# Supplementary material for: Integration of Small RNA and Degradome Sequencing Reveals the Regulatory Network of Al-Induced Programmed Cell Death in Peanut
Source: MDPI journal article supplement (doi:10.3390/ijms23010246), 2021-12-27

### Length distribution of sequencing result (Total)

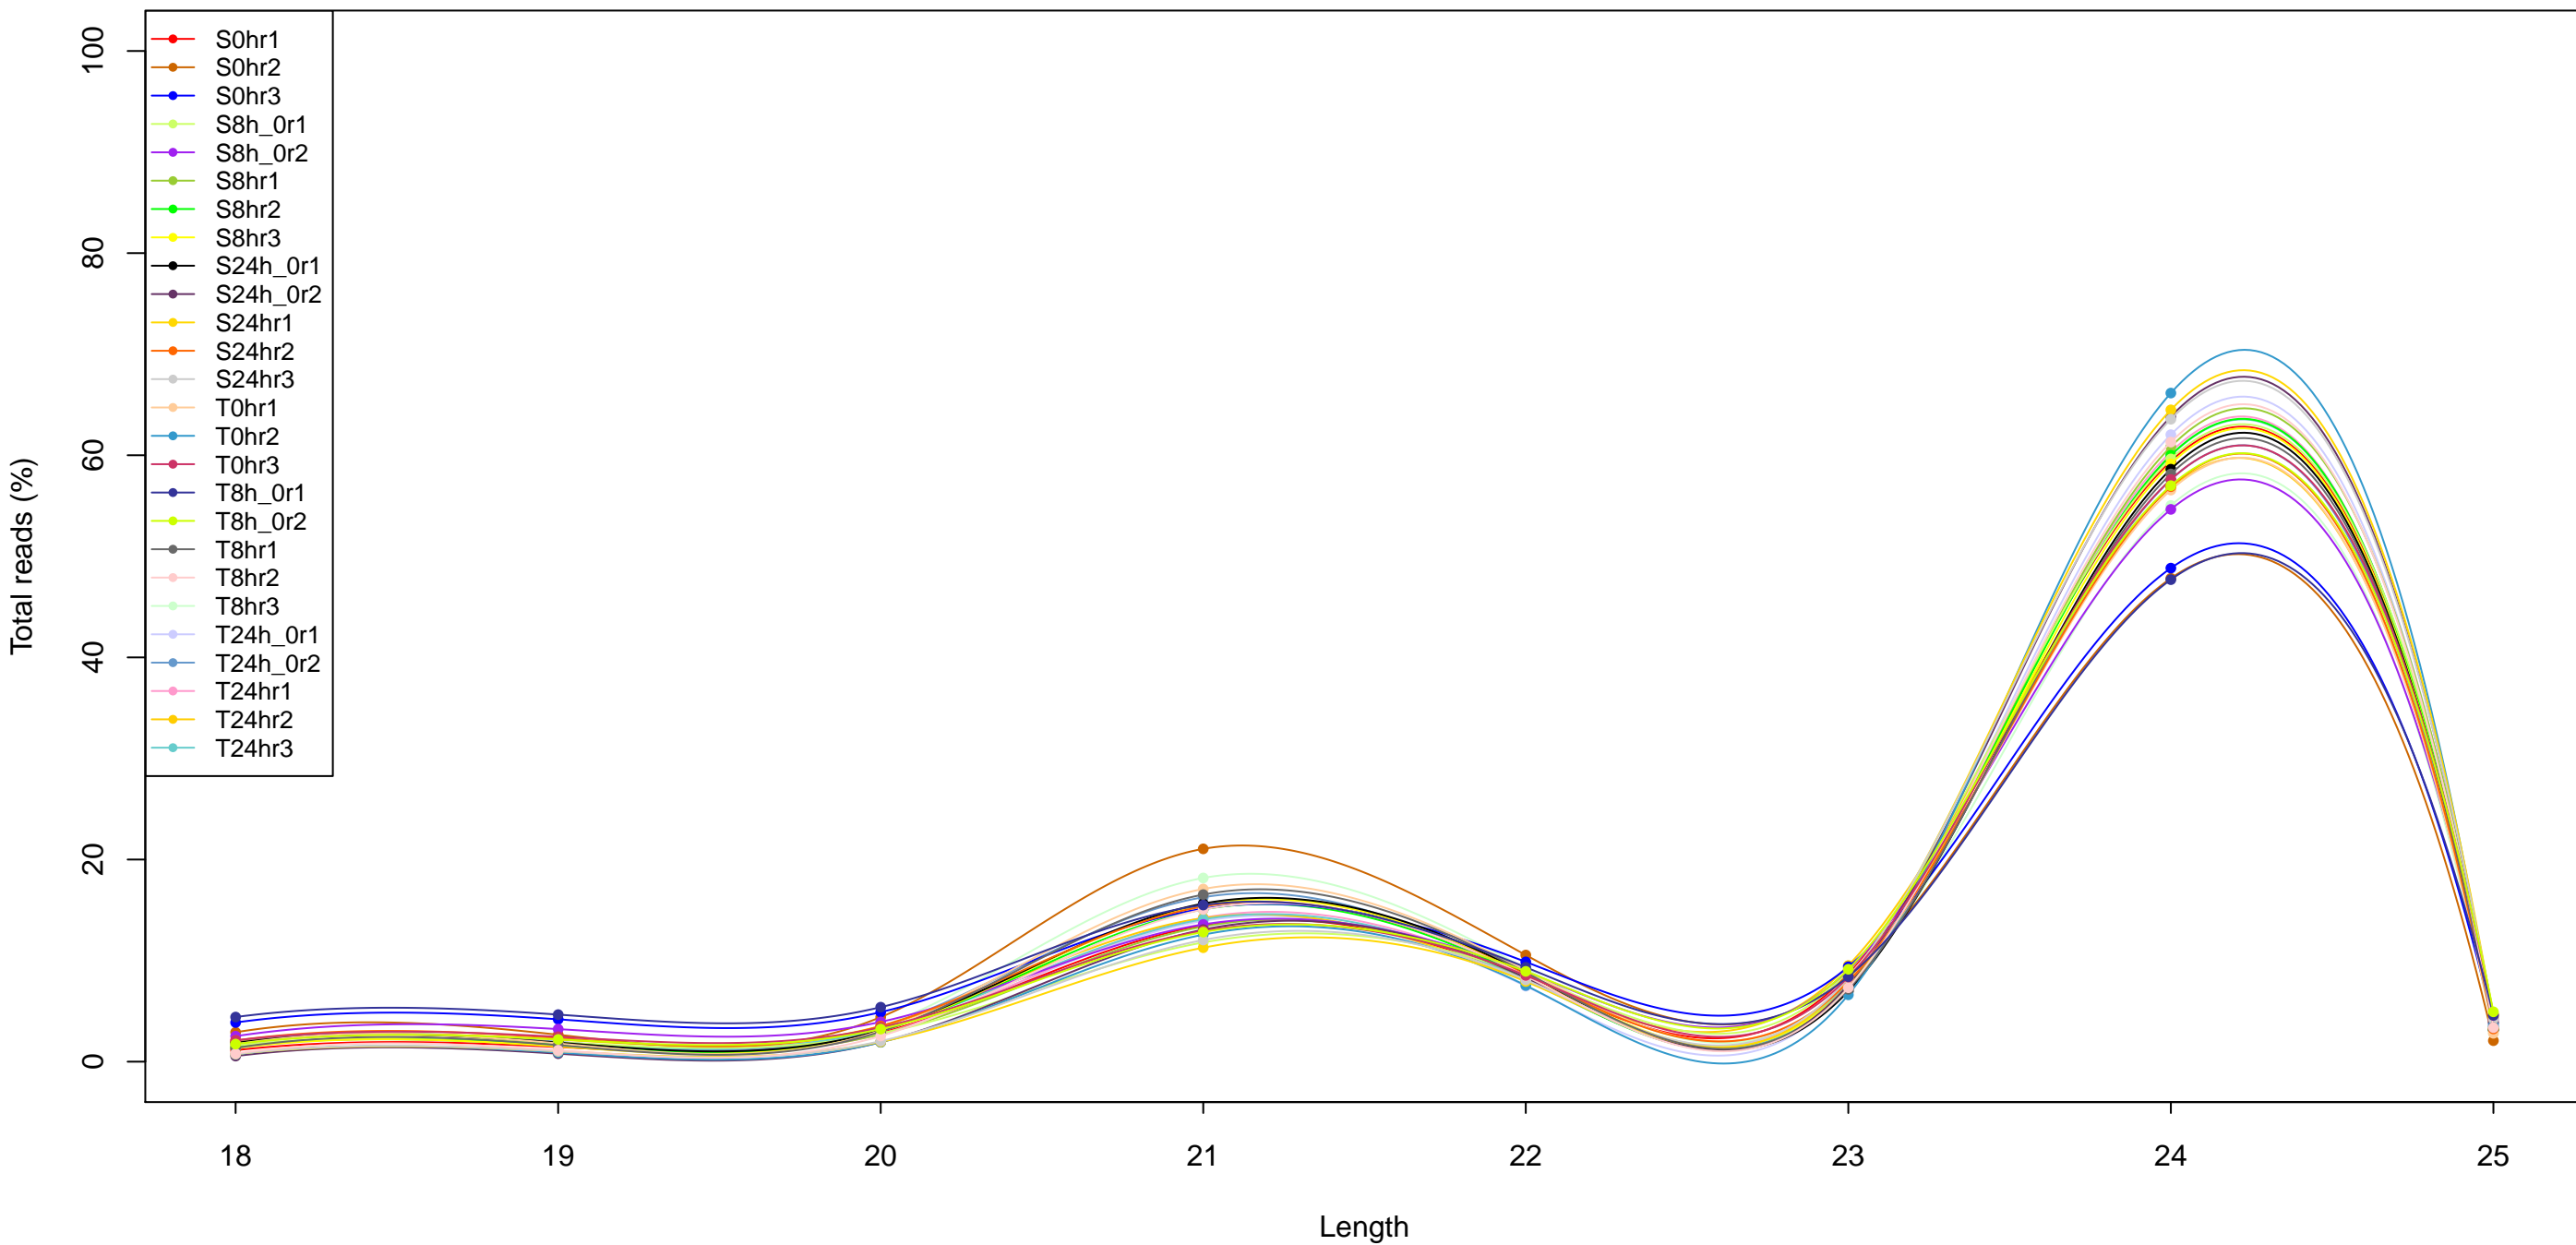

Length distribution of sequencing result (Unique)

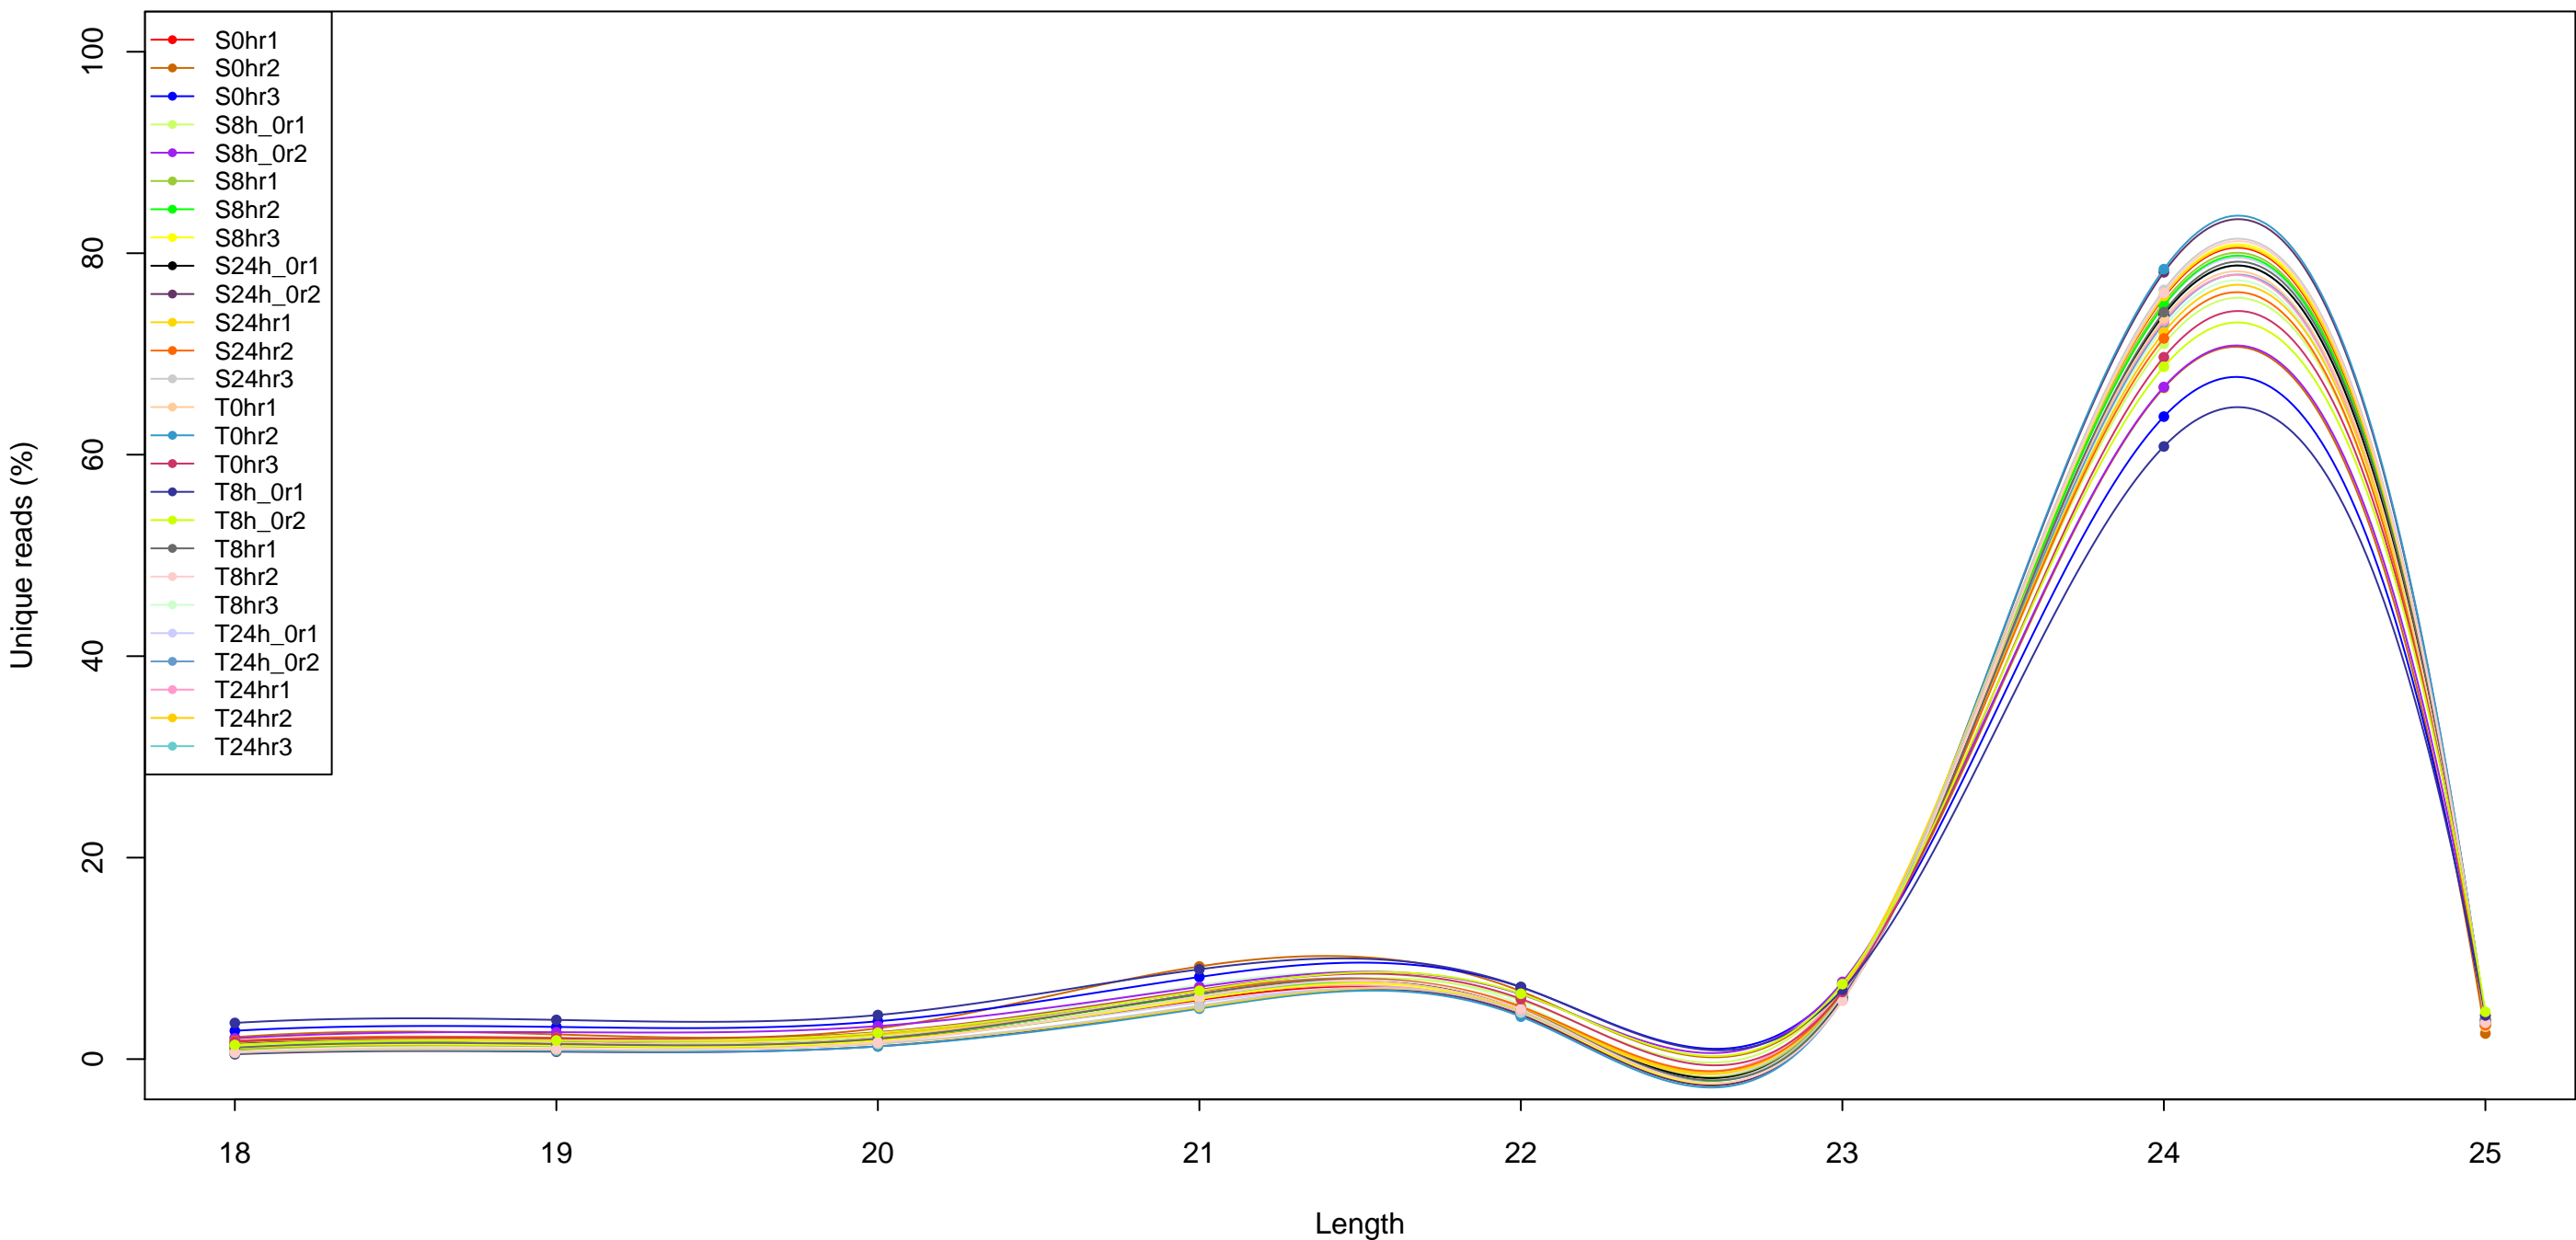

Supplement: s1 [file s1]
