# Supplementary material for: Integration of Small RNA and Degradome Sequencing Reveals the Regulatory Network of Al-Induced Programmed Cell Death in Peanut
Source: Int J Mol Sci. 2021 Dec 27;23(1):246. doi: 10.3390/ijms23010246 (PMC8745729; doi:10.3390/ijms23010246)
Supplement: Supplementary file 1 [file ijms-23-00246-s001.zip]

Archive with 18 entries (18 files):
- Fig S1 The developmental bioinformatics pipeline of data sequencing analysis in this study.pdf
- Fig S2 Length distribution of counts of total and unique sRNA in this study.pdf
- Fig S3 The number of miRNA family members.pdf
- Table S1 Overview of reads from raw data to cleaned sequences.xlsx
- Table S2 All Expressed miRNA.xlsx
- Table S3 Differentially expressed miRNAs under Aluminum Stress.xlsx
- Table S4  Overview of degradome sequences.xlsx
- Table S5-1 The predicted targets of known and novel miRNAs in T0hvsT8hvsT24h.xlsx
- Table S5-2 The predicted targets of known and novel miRNAs in T8hvsT0h.xlsx
- Table S5-3 The predicted targets of known and novel miRNAs in T24hvsT0h.xlsx
- Table S5-4 The predicted targets of known and novel miRNAs in T24hvsT8h.xlsx
- Table S5-5 The predicted targets of known and novel miRNAs in S0hvsS8hvsS24h.xlsx
- Table S5-6 The predicted targets of known and novel miRNAs in S8hvsS0h.xlsx
- Table S5-7 The predicted targets of known and novel miRNAs in S24hvsS0h.xlsx
- Table S5-8 The predicted targets of known and novel miRNAs in S24hvsS8h.xlsx
- Table S6 Identified targets for Al-responsive miRNAs in peanut.xlsx
- Table S7 Differentially expressed miRNAs-mRNA related to aluminum-induced programmed cell death.xlsx
- Table S8 The primers and probes used in this study.xlsx
