# Supplementary material for: Integration of Small RNA and Degradome Sequencing Reveals the Regulatory Network of Al-Induced Programmed Cell Death in Peanut
Source: Int J Mol Sci. 2021 Dec 27;23(1):246. doi: 10.3390/ijms23010246 (PMC8745729; doi:10.3390/ijms23010246)
Supplement: Supplementary file 1 [file ijms-23-00246-s001.zip › Table S1 Overview of reads from raw data to cleaned sequences.xlsx]

## Sheet: Sheet1
Table S1 Overview of reads from raw data to cleaned sequences
Overview of reads from raw data to cleaned sequences.
3ADT&length filter: reads removed due to 3ADT not found and length with <18 nt and >25 nt were removed(for plants); length with<18 and >26 were remove(for animals)
Junk reads:Junk: >=2N, >=7A, >=8C, >=6G, >=7T, >=10Dimer, >=6Trimer, or >=5Tetramer
Rfam:Collection of many common non-coding RNA families except micro RNA; http://rfam.janelia.org
Repeats:Prototypic sequences representing repetitive DNA from different eukaryotic species; http://www.girinst.org/repbase.
Notes:valid reads may not be equal to raw reads - 3ADT&length filter - Junk reads ï¿½C mRNA ï¿½C Rfam - Repeats, because there are overlapped sequences between mRNAï¿½ï¿½Rfam and Repeats, details please refer to _comp_others.txt in fold 2_MappedData.
mRNA_Database:www
		ZH2
		S0hr1				S0hr2				S0hr3				S8h_0r1				S8h_0r2				S8hr1				S8hr2				S8hr3				S24h_0r1				S24h_0r2				S24hr1				S24hr2
lib	type	Total	% of Total	uniq	% of uniq	Total	% of Total	uniq	% of uniq	Total	% of Total	uniq	% of uniq	Total	% of Total	uniq	% of uniq	Total	% of Total	uniq	% of uniq	Total	% of Total	uniq	% of uniq	Total	% of Total	uniq	% of uniq	Total	% of Total	uniq	% of uniq	Total	% of Total	uniq	% of uniq	Total	% of Total	uniq	% of uniq	Total	% of Total	uniq	% of uniq	Total	% of Total	uniq	% of uniq
Raw reads	NA	12536918	100	4288550	100	18436028	100	6904088	100	9378561	100	3297809	100	18538102	100	6429219	100	13408518	100	3876203	100	24715340	100	7800164	100	13464539	100	3967520	100	10416370	100	3646226	100	15405692	100	6294778	100	11512979	100	4261365	100	17478208	100	3489046	100	16635881	100	3912078	100
3ADT&length filter	Sequence type	3967215	31.64	700374	16.33	3897616	21.14	877471	12.71	3052196	32.54	588392	17.84	5153707	27.8	990425	15.41	5126965	38.24	726984	18.76	7501659	30.35	1173001	15.04	5407568	40.16	800492	20.18	3723491	35.75	676593	18.56	1664634	10.81	549695	8.73	3097113	26.9	598715	14.05	8494770	48.6	995425	28.53	8425507	50.65	1057468	27.03
Junk reads	Sequence type	75235	0.6	53285	1.24	142182	0.77	98430	1.43	51779	0.55	38437	1.17	122244	0.66	86287	1.34	56494	0.42	38767	1	168153	0.68	114042	1.46	69243	0.51	48347	1.22	61455	0.59	45653	1.25	127241	0.83	88683	1.41	76916	0.67	55427	1.3	51983	0.3	29896	0.86	57734	0.35	39320	1.01
Rfam	RNA class	550449	4.39	10797	0.25	1126014	6.11	13294	0.19	500896	5.34	9675	0.29	809105	4.36	12191	0.19	684855	5.11	9382	0.24	1428965	5.78	15889	0.2	770928	5.73	10779	0.27	568927	5.46	9324	0.26	735463	4.77	11276	0.18	771680	6.7	9956	0.23	1544744	8.84	17731	0.51	1115115	6.7	12454	0.32
mRNA	RNA class	2452612	19.56	61613	1.44	4198000	22.77	92327	1.34	1929322	20.57	47775	1.45	3801195	20.5	81950	1.27	2649655	19.76	51713	1.33	5770681	23.35	103010	1.32	2657772	19.74	52529	1.32	1977018	18.98	46676	1.28	3685722	23.92	84105	1.34	2459419	21.36	53334	1.25	4749503	27.17	55027	1.58	3822230	22.98	52607	1.34
Repeats	RNA class	10599	0.08	200	0	10897	0.06	245	0	6265	0.07	172	0.01	7357	0.04	220	0	7759	0.06	190	0	13428	0.05	301	0	6082	0.05	186	0	3844	0.04	134	0	8365	0.05	213	0	6775	0.06	169	0	8687	0.05	232	0.01	5051	0.03	161	0
valid reads	Sequence type	6009208	47.93	3471915	80.96	10138535	54.99	5833731	84.5	4320316	46.07	2622009	79.51	9411720	50.77	5268725	81.95	5540829	41.32	3057243	78.87	11198404	45.31	6407247	82.14	5289903	39.29	3064430	77.24	4628520	44.44	2876020	78.88	9883024	64.15	5570340	88.49	5846575	50.78	3552430	83.36	4074704	23.31	2403842	68.9	4284235	25.75	2761076	70.58
rRNA	RNA class	323266	2.58	7803	0.18	594519	3.22	8936	0.13	300312	3.2	6979	0.21	512331	2.76	8398	0.13	316249	2.36	6270	0.16	903942	3.66	11028	0.14	474205	3.52	7514	0.19	309161	2.97	6672	0.18	415906	2.7	7474	0.12	414540	3.6	6922	0.16	1052527	6.02	12892	0.37	806939	4.85	8941	0.23
tRNA	RNA class	191091	1.52	1521	0.04	469361	2.55	2493	0.04	173597	1.85	1424	0.04	245031	1.32	2042	0.03	338684	2.53	1840	0.05	448118	1.81	2805	0.04	260349	1.93	1957	0.05	234190	2.25	1521	0.04	279922	1.82	2309	0.04	329387	2.86	1896	0.04	426376	2.44	3100	0.09	262322	1.58	2168	0.06
snoRNA	RNA class	17866	0.14	498	0.01	29104	0.16	647	0.01	10838	0.12	410	0.01	27927	0.15	622	0.01	15654	0.12	511	0.01	34055	0.14	721	0.01	16744	0.12	484	0.01	12125	0.12	383	0.01	17519	0.11	497	0.01	13637	0.12	449	0.01	14108	0.08	522	0.01	10649	0.06	392	0.01
snRNA	RNA class	1846	0.01	148	0	5524	0.03	335	0	2046	0.02	146	0	5094	0.03	354	0.01	2946	0.02	189	0	5844	0.02	361	0	2564	0.02	191	0	1808	0.02	139	0	4840	0.03	322	0.01	2558	0.02	164	0	6209	0.04	343	0.01	3470	0.02	251	0.01
other Rfam RNA	RNA class	16380	0.13	827	0.02	27506	0.15	883	0.01	14103	0.15	716	0.02	18722	0.1	775	0.01	11322	0.08	572	0.01	37006	0.15	974	0.01	17066	0.13	633	0.02	11643	0.11	609	0.02	17276	0.11	674	0.01	11558	0.1	525	0.01	45524	0.26	874	0.03	31735	0.19	702	0.02
[truncated: 56 more columns]
