# Supplementary material for: Integration of Small RNA and Degradome Sequencing Reveals the Regulatory Network of Al-Induced Programmed Cell Death in Peanut
Source: Int J Mol Sci. 2021 Dec 27;23(1):246. doi: 10.3390/ijms23010246 (PMC8745729; doi:10.3390/ijms23010246)
Supplement: Supplementary file 1 [file ijms-23-00246-s001.zip › Table S2 All Expressed miRNA.xlsx]

## Sheet: Sheet1
Table S2 All Expressed miRNA
Item	Description
Pre-miRNA Index	Pre-miRNA Cluster Index
miRNA_Index	mature miRNA
miR_name	The miR_name is composed of the 1st known miR name in a cluster, a underscore, and a matching annotation: such as
	L-n means the miRNA_seq (detected) is n base less than known rep_miRSeq in the left side;
	R-n means the miRNA_seq (detected) is n base less than known rep_miRSeq in the right side;
	L+n means the miRNA_seq (detected) is n base more than known rep_miRSeq in the left side;
	R+n means the miRNA_seq (detected) is n base more than known rep_miRSeq in the right side;
	2ss5TC13TA means 2 substitution (ss), which are T->C at position 5 and T->A at position 13
	if there is no matching annotation, the miRNA_seq (detected) is exactly same as known rep_miRSeq.
	New discovered 5p/3p sequence has been annotated as p3/p5: which is directly differentiate with the reported sequences,
miR_seq	is a read at 5' or 3' of maximum mapped score in each cluster.
len	miR_seq length
genome ID	Reference Genome Information
strand	strand "+" or "-"
start	pre-miRNA start position
end	Pre-miRNA end position
pre-miRNA_seq	pre-miRNA sequence
#mir/MIR	mapped mir numbers in miRbase, the number in this item eaquals to the sum of mirIDs
mirIDs	is all mirID in a cluster, seprated by ,
rep_mirID	is the representative known mirID
rep_mirSeq	is the representative known mir sequence
rep_miRID	is the representative known miRID
rep_miRSeq	is the representative known miR sequence
type	is 5' or 3', which means the cluster appears at 5' or 3' end
Sequence in miRbase	New, miRNA identified in this study and not reported in miRBase,mainly for new reported 5p or 3p sequence; Diff, confirming miRNA sequences in miRBase, but different sequences are reported in our study; and Yes, confirming miRNA sequences in miRBase.
group	gp1a:Reads were mapped to miRNAs/pre-miRNAs of specific species in miRbase and the pre-miRNAs were further mapped to genome & EST.
	gp1b:Reads were mapped to (except for specific species) miRNAs/pre-miRNAs of selected species in miRbase and the pre-miRNAs were further mapped to genome & EST.
	gp2a:Reads were mapped to miRNAs/pre-miRNAs of selected species in miRbase and the mapped pre-miRNAs were not further mapped to genome, but the reads (and of course the miRNAs of the pre-miRNAs) were mapped to genome. The extended genome sequences from the genome loci may form hairpins.
	gp2b:Reads were mapped to miRNAs/pre-miRNAs of selected species in miRbase and the mapped pre-miRNAs were not further mapped to genome, but the reads (and of course the miRNAs of the pre-miRNAs) were mapped to genome. The extended genome sequences from the genome loci may not form hairpins.
	gp3:Reads were mapped to miRNAs/pre-miRNAs of selected species in miRbase and the mapped pre-miRNAs were not further mapped to genome, and the reads were not mapped to genome, either. but the reads were mapped to the miRNAS(Matures)
	gp4:Reads were not mapped to pre-miRNAs of selected species in miRbase. But the reads were mapped to genome & the extended genome sequences from genome may form hairpins.
SS	Secondary Structure
	Criteria:
	1.number of nucleotides in one bulge in stem : <= 12
	2.number of base pairs in the stem region of the predicted hairpin : >= 16
	3.cutoff of free energy : kCal/mol <= -15
	4.length of hairpin : up and down stems + terminal loop >= 50
	8.number of biased bulges in mature region : <= 2
	10.number of base pairs in the mature region of the predicted hairpin : >= 12
	11.percent of mature in stem : >= 80
hairpinLen	pre-miRNA length
CG%	GC Content
dG	Free energy
MFEI	MFEI = -dG*100/mirLen/CG%. Reference: Cell. Mol. Life Sci. 63 (2006) 246-254.
raw	Raw data; from #reads(all),is the number of reads for isoform at 5' or 3' end.
norm	Normalized data
Expression Level	High:The number of reads in the following reported miRNAs is higher than the average copy of the data set.Medium:The number of reads in the following reported miRNAs is higher than 10 and less than average copy of the data set.Low:The number of reads in the following reported miRNAs is less than 10
Summary of known and predicted miRNA in this study.
Pre-miRNA Index	miRNA_Index	miR_name	miR_seq	len	genomeID	strand	start	end	pre-miRNA_seq	#mir/MIR	mirIDs,	rep_mirID	rep_mirSeq	rep_miRID	rep_miRSeq	type	Sequence in miRbase	group	SS	hairpinLen	CG%	dG	MFEI	T0hr1(raw)	T0hr2(raw)	T0hr3(raw)	T24h_0r1(raw)	T24h_0r2(raw)	T24hr1(raw)	T24hr2(raw)	T24hr3(raw)	T8h_0r1(raw)	T8h_0r2(raw)	T8hr1(raw)	T8hr2(raw)	T8hr3(raw)	S0hr1(raw)	S0hr2(raw)	S0hr3(raw)	S24h_0r1(raw)	S24h_0r2(raw)	S24hr1(raw)	S24hr2(raw)	S24hr3(raw)	S8h_0r1(raw)	S8h_0r2(raw)	S8hr1(raw)	S8hr2(raw)	S8hr3(raw)
1	1	ahy-miR156b-5p_L+1R-2	TTTGACAGAAGATAGAGAGC	20	arahy.Tifrunner.gnm1.Arahy.13	+	130693527	130693564	aacctctggcaataatcTTTGACAGAAGATAGAGAGCt	73	ahy-MIR156b,mtr-MIR156f,mtr-MIR156e,mtr-MIR156h,gma-MIR156d,gma-MIR156m,gma-MIR156c,gma-MIR156j,gma-MIR156i,gma-MIR156l,gma-MIR156g,vun-MIR156b,ptc-MIR156i,ptc-MIR156h,ptc-MIR156j,ptc-MIR156g,ath-MIR157c,ath-MIR157b,ath-MIR157a,ath-MIR156j,mdm-MIR156ab,mdm-MIR156ac,gra-MIR157a,gra-MIR157b,stu-MIR156c,stu-MIR156b,stu-MIR156d,stu-MIR156a,aly-MIR157a,aly-MIR157b,aly-MIR157c,ppe-MIR156h,ppe-MIR156i,p…	ahy-MIR156b	ggaggcactattggtagagttgTTGACAGAAGATAGAGAGCACaaaagatgatatgcatatagatatatatagtctgcattttattcctttgtGCTCTCTAAGCTTCTGTCATCactcttcagcctctatttcta	ahy-miR156b-5p	TTGACAGAAGATAGAGAGCAC	3'	Diff	gp1a	...((((.......((((((....))))))))))....	31	39.5	-5.5	0.4	0	0	0	3.5	0	0	0	0	5.5	0	0	0	0	2.5	5.5	2.5	0	0	0	0	0	3	0	9.5	0	0
2	2	ahy-miR156b-5p	TTGACAGAAGATAGAGAGCAC	21	arahy.Tifrunner.gnm1.Arahy.03	+	136187044	136187247	accgatgaaaccgagggaggggaagggaaaggaagaattgaaggggaagaatggcagaggggttTTGACAGAAGATAGAGAGCACagacgatgatatgcataaattctgcatctcactcttttgtGCTCTCTATTCTTCTGTCATCaccttcgttctcctctttacttccgcgccctcaaccaacctttcattctttcatctct	91	ahy-MIR156b,mtr-MIR156f,mtr-MIR156h,mtr-MIR156e,gma-MIR156m,gma-MIR156c,gma-MIR156j,gma-MIR156l,gma-MIR156g,gma-MIR156d,gma-MIR156i,gma-MIR156e,gma-MIR156r,vun-MIR156b,ptc-MIR156h,ptc-MIR156i,ptc-MIR156j,ptc-MIR156g,ath-MIR157b,ath-MIR157c,ath-MIR157a,ath-MIR157d,ath-MIR156j,mdm-MIR156ab,mdm-MIR156ac,mdm-MIR156aa,mdm-MIR156q,mdm-MIR156s,mdm-MIR156y,mdm-MIR156p,mdm-MIR156r,mdm-MIR156x,mdm-MIR156z,…	ahy-MIR156b	ggaggcactattggtagagttgTTGACAGAAGATAGAGAGCACaaaagatgatatgcatatagatatatatagtctgcattttattcctttgtGCTCTCTAAGCTTCTGTCATCactcttcagcctctatttcta	ahy-miR156b-5p	TTGACAGAAGATAGAGAGCAC	5'	Yes	gp1a	...(((((((..(((((..((..((((...(((((...((((((((.(((((((.....((((..(((((((((((((((((((((((.(((((.(((((.......))))).))).)).)))))))))))))).)))))))))..))))))))))))))))))))))))...))))...))..))))).....)))))))...	198	45.6	-94.7	1	6779.5	5744	6043	9124	5478	1453.5	1131.5	2652	13773	5699	4232.5	4405.5	4241.5	7552	11434	5180	6412	5162.5	2785	3182	4222.5	6383.5	6943.5	11805.5	3257.5	3224
2	3	ahy-miR156b-3p_2ss9AT10GT	GCTCTCTATTCTTCTGTCATC	21	arahy.Tifrunner.gnm1.Arahy.03	+	136187044	136187247	accgatgaaaccgagggaggggaagggaaaggaagaattgaaggggaagaatggcagaggggttTTGACAGAAGATAGAGAGCACagacgatgatatgcataaattctgcatctcactcttttgtGCTCTCTATTCTTCTGTCATCaccttcgttctcctctttacttccgcgccctcaaccaacctttcattctttcatctct	91	ahy-MIR156b,mtr-MIR156f,mtr-MIR156h,mtr-MIR156e,gma-MIR156m,gma-MIR156c,gma-MIR156j,gma-MIR156l,gma-MIR156g,gma-MIR156d,gma-MIR156i,gma-MIR156e,gma-MIR156r,vun-MIR156b,ptc-MIR156h,ptc-MIR156i,ptc-MIR156j,ptc-MIR156g,ath-MIR157b,ath-MIR157c,ath-MIR157a,ath-MIR157d,ath-MIR156j,mdm-MIR156ab,mdm-MIR156ac,mdm-MIR156aa,mdm-MIR156q,mdm-MIR156s,mdm-MIR156y,mdm-MIR156p,mdm-MIR156r,mdm-MIR156x,mdm-MIR156z,…	ahy-MIR156b	ggaggcactattggtagagttgTTGACAGAAGATAGAGAGCACaaaagatgatatgcatatagatatatatagtctgcattttattcctttgtGCTCTCTAAGCTTCTGTCATCactcttcagcctctatttcta	ahy-miR156b-3p	GCTCTCTAAGCTTCTGTCATC	3'	Diff	gp1a	...(((((((..(((((..((..((((...(((((...((((((((.(((((((.....((((..(((((((((((((((((((((((.(((((.(((((.......))))).))).)).)))))))))))))).)))))))))..))))))))))))))))))))))))...))))...))..))))).....)))))))...	198	45.6	-94.7	1	32.5	35	32.5	32.5	19.5	8	0	12.5	77	32	20.5	15.5	18.5	38.5	54	21.5	37.5	32.5	9	9	19	58.5	39	87.5	18	25
3	4	ahy-miR156b-5p_R-1	TTGACAGAAGATAGAGAGCA	20	arahy.Tifrunner.gnm1.Arahy.13	+	139006240	139006443	accgatgaaaccgatgaaggggaagggaaaggaagaattgaaggggaagaatggcagaggggttTTGACAGAAGATAGAGAGCAcagacgatgatatgcatcaattctgcatctcactcttttgtGCTCTCTATTCTTCTGTCATCaccttcgttctcctctttacttccgcgccctcaaccaacctttcatttttccatctct	90	ahy-MIR156b,mtr-MIR156f,mtr-MIR156h,mtr-MIR156e,gma-MIR156m,gma-MIR156c,gma-MIR156j,gma-MIR156e,gma-MIR156l,gma-MIR156g,gma-MIR156d,gma-MIR156i,vun-MIR156b,ptc-MIR156h,ptc-MIR156i,ptc-MIR156j,ptc-MIR156g,ath-MIR157d,ath-MIR156j,ath-MIR157b,ath-MIR157c,ath-MIR157a,mdm-MIR156aa,mdm-MIR156q,mdm-MIR156s,mdm-MIR156y,mdm-MIR156p,mdm-MIR156r,mdm-MIR156x,mdm-MIR156z,mdm-MIR156ab,mdm-MIR156ac,gra-MIR157a,…	ahy-MIR156b	ggaggcactattggtagagttgTTGACAGAAGATAGAGAGCACaaaagatgatatgcatatagatatatatagtctgcattttattcctttgtGCTCTCTAAGCTTCTGTCATCactcttcagcctctatttcta	ahy-miR156b-5p	TTGACAGAAGATAGAGAGCAC	5'	Diff	gp1a	...(((((((..(((((((((..((((...(((((...((((((((.(((((((.....((((..(((((((((((((((((((((((.(((((.(((((.......))))).))).)).)))))))))))))).)))))))))..))))))))))))))))))))))))...)))).......))))))))))))).)))...	198	45.1	-92.8	1	219.5	192.5	192	256	149	39	29.5	76	441	130.5	111	139	123.5	234	468.5	174	177	171	79.5	81.5	128	175.5	231	363.5	127	103.5
3	5	ahy-miR156b-3p_2ss9AT10GT	GCTCTCTATTCTTCTGTCATC	21	arahy.Tifrunner.gnm1.Arahy.13	+	139006240	139006443	accgatgaaaccgatgaaggggaagggaaaggaagaattgaaggggaagaatggcagaggggttTTGACAGAAGATAGAGAGCAcagacgatgatatgcatcaattctgcatctcactcttttgtGCTCTCTATTCTTCTGTCATCaccttcgttctcctctttacttccgcgccctcaaccaacctttcatttttccatctct	90	ahy-MIR156b,mtr-MIR156f,mtr-MIR156h,mtr-MIR156e,gma-MIR156m,gma-MIR156c,gma-MIR156j,gma-MIR156e,gma-MIR156l,gma-MIR156g,gma-MIR156d,gma-MIR156i,vun-MIR156b,ptc-MIR156h,ptc-MIR156i,ptc-MIR156j,ptc-MIR156g,ath-MIR157d,ath-MIR156j,ath-MIR157b,ath-MIR157c,ath-MIR157a,mdm-MIR156aa,mdm-MIR156q,mdm-MIR156s,mdm-MIR156y,mdm-MIR156p,mdm-MIR156r,mdm-MIR156x,mdm-MIR156z,mdm-MIR156ab,mdm-MIR156ac,gra-MIR157a,…	ahy-MIR156b	ggaggcactattggtagagttgTTGACAGAAGATAGAGAGCACaaaagatgatatgcatatagatatatatagtctgcattttattcctttgtGCTCTCTAAGCTTCTGTCATCactcttcagcctctatttcta	ahy-miR156b-3p	GCTCTCTAAGCTTCTGTCATC	3'	Diff	gp1a	...(((((((..(((((((((..((((...(((((...((((((((.(((((((.....((((..(((((((((((((((((((((((.(((((.(((((.......))))).))).)).)))))))))))))).)))))))))..))))))))))))))))))))))))...)))).......))))))))))))).)))...	198	45.1	-92.8	1	32.5	35	32.5	32.5	19.5	8	0	12.5	77	32	20.5	15.5	18.5	38.5	54	21.5	37.5	32.5	9	9	19	58.5	39	87.5	18	25
4	6	ahy-miR156b-5p_R-2	TTGACAGAAGATAGAGAGC	19	arahy.Tifrunner.gnm1.Arahy.08	+	7389509	7389537	atattgtcttTTGACAGAAGATAGAGAGC	73	ahy-MIR156b,mtr-MIR156f,mtr-MIR156e,mtr-MIR156h,gma-MIR156d,gma-MIR156m,gma-MIR156c,gma-MIR156j,gma-MIR156i,gma-MIR156l,gma-MIR156g,vun-MIR156b,ptc-MIR156i,ptc-MIR156h,ptc-MIR156j,ptc-MIR156g,ath-MIR157c,ath-MIR157b,ath-MIR157a,ath-MIR156j,mdm-MIR156ab,mdm-MIR156ac,gra-MIR157a,gra-MIR157b,stu-MIR156c,stu-MIR156b,stu-MIR156d,stu-MIR156a,aly-MIR157a,aly-MIR157b,aly-MIR157c,ppe-MIR156h,ppe-MIR156i,p…	ahy-MIR156b	ggaggcactattggtagagttgTTGACAGAAGATAGAGAGCACaaaagatgatatgcatatagatatatatagtctgcattttattcctttgtGCTCTCTAAGCTTCTGTCATCactcttcagcctctatttcta	ahy-miR156b-5p	TTGACAGAAGATAGAGAGCAC	3'	Diff	gp1a	...((((((((.....)))))))).....	21	34.5	-5	0.5	35.5	37.5	14.5	40	22	6.5	7.5	13	71.5	14.5	16	39.5	9.5	71.5	82.5	32.5	55.5	19.5	21.5	14	26.5	46	49.5	79.5	23	23.5
4	7	ahy-miR156b-5p_R-2	TTGACAGAAGATAGAGAGC	19	arahy.Tifrunner.gnm1.Arahy.19	+	11513914	11513942	atattgtcttTTGACAGAAGATAGAGAGC	72	ahy-MIR156b,mtr-MIR156f,mtr-MIR156h,mtr-MIR156e,gma-MIR156m,gma-MIR156c,gma-MIR156j,gma-MIR156l,gma-MIR156g,gma-MIR156d,gma-MIR156i,vun-MIR156b,ptc-MIR156h,ptc-MIR156i,ptc-MIR156j,ptc-MIR156g,ath-MIR157b,ath-MIR157c,ath-MIR157a,mdm-MIR156ab,mdm-MIR156ac,gra-MIR157a,gra-MIR157b,stu-MIR156b,stu-MIR156a,stu-MIR156c,stu-MIR156d,aly-MIR157c,aly-MIR157a,aly-MIR157b,ppe-MIR156h,ppe-MIR156g,ppe-MIR156i,m…	ahy-MIR156b	ggaggcactattggtagagttgTTGACAGAAGATAGAGAGCACaaaagatgatatgcatatagatatatatagtctgcattttattcctttgtGCTCTCTAAGCTTCTGTCATCactcttcagcctctatttcta	ahy-miR156b-5p	TTGACAGAAGATAGAGAGCAC	3'	Diff	gp1a	...((((((((.....)))))))).....	21	34.5	-5	0.5	35.5	37.5	14.5	40	22	6.5	7.5	13	71.5	14.5	16	39.5	9.5	71.5	82.5	32.5	55.5	19.5	21.5	14	26.5	46	49.5	79.5	23	23.5
5	8	ahy-miR156b-3p	GCTCTCTAAGCTTCTGTCATC	21	arahy.Tifrunner.gnm1.Arahy.15	-	143407452	143407603	attggtagagttgttgACAGAAGATAGAGAGCACAAAagatgatatgcatatagatatatagtcacatacatacacatatggatggatcaaaagccaattgcattttatttctttgtGCTCTCTAAGCTTCTGTCATCactcttcagcctcc	98	ahy-MIR156b,mtr-MIR156f,mtr-MIR156h,mtr-MIR156e,mtr-MIR156g,gma-MIR156m,gma-MIR156c,gma-MIR156j,gma-MIR156l,gma-MIR156g,gma-MIR156d,gma-MIR156i,gma-MIR156e,vun-MIR156b,ptc-MIR156h,ptc-MIR156i,ptc-MIR156j,ptc-MIR156g,ath-MIR157b,ath-MIR157c,ath-MIR157a,ath-MIR157d,ath-MIR156h,mdm-MIR156ab,mdm-MIR156ac,mdm-MIR156aa,mdm-MIR156q,mdm-MIR156s,mdm-MIR156y,mdm-MIR156p,mdm-MIR156r,mdm-MIR156x,mdm-MIR156z,…	ahy-MIR156b	ggaggcactattggtagagttgTTGACAGAAGATAGAGAGCACaaaagatgatatgcatatagatatatatagtctgcattttattcctttgtGCTCTCTAAGCTTCTGTCATCactcttcagcctctatttcta	ahy-miR156b-3p	GCTCTCTAAGCTTCTGTCATC	3'	Yes	gp1a	...(((((((.((.(((((((((.(((((((((((((((((((.(((((............(((.(((.((((....)))).))))))...........))))).)))))).)))))))))))))..))))))))).))))))...)))...	146	36.2	-56.2	1	79	62	60.5	73	41.5	11	5	24.5	140	68.5	40.5	39	42	65	90	29.5	46	54	18.5	11	19	73	63	79.5	30.5	33.5
6	9	ahy-miR156b-5p_1ss1TA	ATGACAGAAGATAGAGAGCAC	21	arahy.Tifrunner.gnm1.Arahy.10	-	104826262	104826349	catgggaattccagatgactggcttgaagagttttgtgattgagATGACAGAAGAGAGAGAGCACaaccagagtctgaaattcccgat	87	ahy-MIR156b,mtr-MIR156a,mtr-MIR156f,mtr-MIR156h,mtr-MIR156e,gma-MIR156m,gma-MIR156c,gma-MIR156j,gma-MIR156e,gma-MIR156l,gma-MIR156g,gma-MIR156d,gma-MIR156i,vun-MIR156b,ptc-MIR156h,ptc-MIR156i,ptc-MIR156j,ptc-MIR156g,ath-MIR157d,ath-MIR157b,ath-MIR157c,ath-MIR157a,mdm-MIR156aa,mdm-MIR156q,mdm-MIR156s,mdm-MIR156y,mdm-MIR156p,mdm-MIR156r,mdm-MIR156x,mdm-MIR156z,mdm-MIR156ab,mdm-MIR156ac,gra-MIR157a,…	ahy-MIR156b	ggaggcactattggtagagttgTTGACAGAAGATAGAGAGCACaaaagatgatatgcatatagatatatatagtctgcattttattcctttgtGCTCTCTAAGCTTCTGTCATCactcttcagcctctatttcta	ahy-miR156b-5p	TTGACAGAAGATAGAGAGCAC	3'	Diff	gp1a	..((((((((.(((((..(((((((......((((((.((....)).))))))......)))).....))).))))).))))))))..	84	44.3	-26.2	0.7	3	3	0	3	3.5	0	0	0	27.5	0	0	3	0	0	5	0	0	3.5	0	0	5.5	3.5	4.5	19	0	0
6	10	ahy-miR156b-5p_1ss1TA	ATGACAGAAGATAGAGAGCAC	21	arahy.Tifrunner.gnm1.Arahy.20	-	129173369	129173456	catgggaattccagatgactggcttgaagagttttgtgattgagATGACAGAAGAGAGAGAGCACaaccagagtctgaaattcccgat	89	ahy-MIR156b,mtr-MIR156a,mtr-MIR156f,mtr-MIR156h,mtr-MIR156e,gma-MIR156w,gma-MIR156m,gma-MIR156c,gma-MIR156j,gma-MIR156e,gma-MIR156l,gma-MIR156g,gma-MIR156d,gma-MIR156i,vun-MIR156b,ptc-MIR156h,ptc-MIR156i,ptc-MIR156j,ptc-MIR156g,ath-MIR157d,ath-MIR157b,ath-MIR157c,ath-MIR157a,mdm-MIR156aa,mdm-MIR156q,mdm-MIR156s,mdm-MIR156y,mdm-MIR156p,mdm-MIR156r,mdm-MIR156x,mdm-MIR156z,mdm-MIR156ab,mdm-MIR156ac,…	ahy-MIR156b	ggaggcactattggtagagttgTTGACAGAAGATAGAGAGCACaaaagatgatatgcatatagatatatatagtctgcattttattcctttgtGCTCTCTAAGCTTCTGTCATCactcttcagcctctatttcta	ahy-miR156b-5p	TTGACAGAAGATAGAGAGCAC	3'	Diff	gp1a	..((((((((.(((((..(((((((......((((((.((....)).))))))......)))).....))).))))).))))))))..	84	44.3	-26.2	0.7	3	3	0	3	3.5	0	0	0	27.5	0	0	3	0	0	5	0	0	3.5	0	0	5.5	3.5	4.5	19	0	0
7	11	ahy-miR156b-5p_L+1	CTTGACAGAAGATAGAGAGCAC	22	arahy.Tifrunner.gnm1.Arahy.06	+	12904858	12904932	ccgagacttggtgccatgttactagatccccatgtttggCTTGACAGAAGAGAGAGAGCACagcttgagtctgct	57	ahy-MIR156b,mtr-MIR156h,mtr-MIR156f,mtr-MIR156e,gma-MIR156j,gma-MIR156i,gma-MIR156d,gma-MIR156m,gma-MIR156l,gma-MIR156g,gma-MIR156c,vun-MIR156b,ptc-MIR156i,ptc-MIR156h,ptc-MIR156j,ptc-MIR156g,ath-MIR157c,ath-MIR157b,ath-MIR157a,mdm-MIR156ab,mdm-MIR156ac,gra-MIR157b,gra-MIR157a,aly-MIR157a,aly-MIR157b,aly-MIR157c,ppe-MIR156h,ppe-MIR156i,vvi-MIR156i,vvi-MIR156f,vvi-MIR156g,nta-MIR156j,nta-MIR156h,n…	ahy-MIR156b	ggaggcactattggtagagttgTTGACAGAAGATAGAGAGCACaaaagatgatatgcatatagatatatatagtctgcattttattcctttgtGCTCTCTAAGCTTCTGTCATCactcttcagcctctatttcta	ahy-miR156b-5p	TTGACAGAAGATAGAGAGCAC	3'	Diff	gp1a	...(((((..(.((..((((.((...((....((((......))))...))...))))))..)))..)))))...	69	50.7	-18.2	0.5	18	12.5	14.5	20.5	17.5	4	3.5	9	35.5	15	13.5	11	11.5	9.5	19	10.5	8	15	4.5	4	7	16	15	20.5	9.5	10
8	12	ahy-miR156a_L+1	TTGACAGAAGAGAGAGAGCAC	21	arahy.Tifrunner.gnm1.Arahy.07	+	872997	873135	cctcgaagagattataaatgTTGACAGAAGAGAGAGAGCACaacccgagaaatggtcaaagaatcttttacctttgttgggagtgtgctctctactcttctgtcatcatctttatctttatttgtatggtatagatctt	4	ahy-MIR156c,ahy-MIR156a,mes-MIR156k,rco-MIR156e,	ahy-MIR156a	gaagagattataaatgtTGACAGAAGAGAGAGAGCACaacccgagaaatggtcaaagaatcttttacctttgttgggagtgtgctctctactcttctgtcatcatctttatcttta	ahy-miR156a	TGACAGAAGAGAGAGAGCAC	5'	Diff	gp1a	......((((((.....(((.(((((((((((((((((((((.(((((.(((.(((.((((...)))).)))))).)))))..)))))))))).))))))))))).)))....))))))....................	113	37.4	-56.3	1.1	34	23	29	40	18	0	10	8	67	16	5	25	23	42	51	21	41	37	16	15	24	34	17	85	30	21
9	13	ahy-miR156b-5p	TTGACAGAAGATAGAGAGCAC	21	arahy.Tifrunner.gnm1.Arahy.05	+	100910170	100910320	ggtagagttgTTGACAGAAGATAGAGAGCACaaaagatgatatgcatatagatatatatagtcacatactacacatatacacatatggatggatcgaaagccaattgcattttattcctttgtGCTCTCTAAGCTTCTGTCATCactcttc	89	ahy-MIR156b,mtr-MIR156f,mtr-MIR156h,mtr-MIR156e,gma-MIR156m,gma-MIR156c,gma-MIR156j,gma-MIR156l,gma-MIR156g,gma-MIR156d,gma-MIR156i,gma-MIR156e,gma-MIR156r,vun-MIR156b,ptc-MIR156h,ptc-MIR156i,ptc-MIR156j,ptc-MIR156g,ath-MIR157b,ath-MIR157c,ath-MIR157a,ath-MIR157d,mdm-MIR156aa,mdm-MIR156q,mdm-MIR156s,mdm-MIR156y,mdm-MIR156p,mdm-MIR156r,mdm-MIR156x,mdm-MIR156z,mdm-MIR156ab,mdm-MIR156ac,gra-MIR157a,…	ahy-MIR156b	ggaggcactattggtagagttgTTGACAGAAGATAGAGAGCACaaaagatgatatgcatatagatatatatagtctgcattttattcctttgtGCTCTCTAAGCTTCTGTCATCactcttcagcctctatttcta	ahy-miR156b-5p	TTGACAGAAGATAGAGAGCAC	5'	Yes	gp1a	...((((.((.(((((((((.(((((((((((((.(((((.(((((....(((.......))).....(((..(((((....)))))..))).............))))).)))))..)))))))))))))..))))))))).))))))..	146	35.8	-53.1	1	6779.5	5744	6043	9124	5478	1453.5	1131.5	2652	13773	5699	4232.5	4405.5	4241.5	7552	11434	5180	6412	5162.5	2785	3182	4222.5	6383.5	6943.5	11805.5	3257.5	3224
9	14	ahy-miR156b-3p	GCTCTCTAAGCTTCTGTCATC	21	arahy.Tifrunner.gnm1.Arahy.05	+	100910170	100910320	ggtagagttgTTGACAGAAGATAGAGAGCACaaaagatgatatgcatatagatatatatagtcacatactacacatatacacatatggatggatcgaaagccaattgcattttattcctttgtGCTCTCTAAGCTTCTGTCATCactcttc	89	ahy-MIR156b,mtr-MIR156f,mtr-MIR156h,mtr-MIR156e,gma-MIR156m,gma-MIR156c,gma-MIR156j,gma-MIR156l,gma-MIR156g,gma-MIR156d,gma-MIR156i,gma-MIR156e,gma-MIR156r,vun-MIR156b,ptc-MIR156h,ptc-MIR156i,ptc-MIR156j,ptc-MIR156g,ath-MIR157b,ath-MIR157c,ath-MIR157a,ath-MIR157d,mdm-MIR156aa,mdm-MIR156q,mdm-MIR156s,mdm-MIR156y,mdm-MIR156p,mdm-MIR156r,mdm-MIR156x,mdm-MIR156z,mdm-MIR156ab,mdm-MIR156ac,gra-MIR157a,…	ahy-MIR156b	ggaggcactattggtagagttgTTGACAGAAGATAGAGAGCACaaaagatgatatgcatatagatatatatagtctgcattttattcctttgtGCTCTCTAAGCTTCTGTCATCactcttcagcctctatttcta	ahy-miR156b-3p	GCTCTCTAAGCTTCTGTCATC	3'	Yes	gp1a	...((((.((.(((((((((.(((((((((((((.(((((.(((((....(((.......))).....(((..(((((....)))))..))).............))))).)))))..)))))))))))))..))))))))).))))))..	146	35.8	-53.1	1	79	62	60.5	73	41.5	11	5	24.5	140	68.5	40.5	39	42	65	90	29.5	46	54	18.5	11	19	73	63	79.5	30.5	33.5
10	15	ahy-miR156b-5p_1ss10GT	TTGACAGAATATAGAGAGCAC	21	arahy.Tifrunner.gnm1.Arahy.04	-	127838436	127838627	tagtcatcattaactgtcatgtatgaggagaggaggtatttaggcgtgttgTTGACAGAAGATAGAGAGCACagatgatgacatgcataaaattagaatgaatatggcattttactcatttgtGCTCTCTATTCTTCTGTCATCAcccttaactttggtctctgtactcatattatatattagttattatga	93	ahy-MIR156b,mtr-MIR156f,mtr-MIR156e,mtr-MIR156h,mtr-MIR156g,gma-MIR156d,gma-MIR156m,gma-MIR156c,gma-MIR156j,gma-MIR156i,gma-MIR156l,gma-MIR156g,gma-MIR156e,vun-MIR156b,ptc-MIR156i,ptc-MIR156h,ptc-MIR156j,ptc-MIR156g,ath-MIR157c,ath-MIR157b,ath-MIR157a,ath-MIR157d,mdm-MIR156aa,mdm-MIR156q,mdm-MIR156s,mdm-MIR156y,mdm-MIR156p,mdm-MIR156r,mdm-MIR156x,mdm-MIR156z,mdm-MIR156ab,mdm-MIR156ac,gra-MIR157a,…	ahy-MIR156b	ggaggcactattggtagagttgTTGACAGAAGATAGAGAGCACaaaagatgatatgcatatagatatatatagtctgcattttattcctttgtGCTCTCTAAGCTTCTGTCATCactcttcagcctctatttcta	ahy-miR156b-5p	TTGACAGAAGATAGAGAGCAC	5'	Diff	gp1a	...((((...((((((....(((((((((((.(((((....(((.(((....(((((((((((((((((((((((((((((.((((.....(((......)))...)))).))).))))))))))))))))).))))))))).))))))..)))))..))))....))))))).......))))))..))))	189	34.4	-67.9	1	15	23	11.5	16.5	0	6	0	0	56	33	8	2.5	5.5	30	39.5	12	35.5	19.5	2.5	3	0	36	23.5	48	5.5	2.5
10	16	ahy-miR156b-3p_R+1_2ss9AT10GT	GCTCTCTATTCTTCTGTCATCT	22	arahy.Tifrunner.gnm1.Arahy.04	-	127838436	127838627	tagtcatcattaactgtcatgtatgaggagaggaggtatttaggcgtgttgTTGACAGAAGATAGAGAGCACagatgatgacatgcataaaattagaatgaatatggcattttactcatttgtGCTCTCTATTCTTCTGTCATCAcccttaactttggtctctgtactcatattatatattagttattatga	93	ahy-MIR156b,mtr-MIR156f,mtr-MIR156e,mtr-MIR156h,mtr-MIR156g,gma-MIR156d,gma-MIR156m,gma-MIR156c,gma-MIR156j,gma-MIR156i,gma-MIR156l,gma-MIR156g,gma-MIR156e,vun-MIR156b,ptc-MIR156i,ptc-MIR156h,ptc-MIR156j,ptc-MIR156g,ath-MIR157c,ath-MIR157b,ath-MIR157a,ath-MIR157d,mdm-MIR156aa,mdm-MIR156q,mdm-MIR156s,mdm-MIR156y,mdm-MIR156p,mdm-MIR156r,mdm-MIR156x,mdm-MIR156z,mdm-MIR156ab,mdm-MIR156ac,gra-MIR157a,…	ahy-MIR156b	ggaggcactattggtagagttgTTGACAGAAGATAGAGAGCACaaaagatgatatgcatatagatatatatagtctgcattttattcctttgtGCTCTCTAAGCTTCTGTCATCactcttcagcctctatttcta	ahy-miR156b-3p	GCTCTCTAAGCTTCTGTCATC	3'	Diff	gp1a	...((((...((((((....(((((((((((.(((((....(((.(((....(((((((((((((((((((((((((((((.((((.....(((......)))...)))).))).))))))))))))))))).))))))))).))))))..)))))..))))....))))))).......))))))..))))	189	34.4	-67.9	1	0	0	2.5	0	0	0	0	0	0	0	0	0	0	0	3	0	0	0	0	0	0	0	0	0	0	0
11	17	ahy-miR156b-5p_R+1	TTGACAGAAGATAGAGAGCACT	22	arahy.Tifrunner.gnm1.Arahy.14	-	142273965	142274157	tagtcatcattaactgtcatgtatgaggagaggaggtatttaggcgtgttgTTGACAGAAGATAGAGAGCACAgatgatgacatgcataaaattagaatgaatatggcattttactcatttgtGCTCTCTATTCTTCTGTCATCAcccttaactttggtctctgtactcatattatatattagttattatgaa	90	ahy-MIR156b,mtr-MIR156f,mtr-MIR156e,mtr-MIR156h,gma-MIR156d,gma-MIR156m,gma-MIR156c,gma-MIR156j,gma-MIR156i,gma-MIR156l,gma-MIR156g,gma-MIR156e,vun-MIR156b,ptc-MIR156i,ptc-MIR156h,ptc-MIR156j,ptc-MIR156g,ptc-MIR156l,ath-MIR157c,ath-MIR157b,ath-MIR157a,ath-MIR157d,mdm-MIR156ab,mdm-MIR156ac,mdm-MIR156aa,mdm-MIR156q,mdm-MIR156s,mdm-MIR156y,mdm-MIR156p,mdm-MIR156r,mdm-MIR156x,mdm-MIR156z,gra-MIR157a,…	ahy-MIR156b	ggaggcactattggtagagttgTTGACAGAAGATAGAGAGCACaaaagatgatatgcatatagatatatatagtctgcattttattcctttgtGCTCTCTAAGCTTCTGTCATCactcttcagcctctatttcta	ahy-miR156b-5p	TTGACAGAAGATAGAGAGCAC	5'	Diff	gp1a	...((((...((((((....(((((((((((.(((((....(((.(((....(((((((((((((((((((((((((((((.((((.....(((......)))...)))).))).))))))))))))))))).))))))))).))))))..)))))..))))....))))))).......))))))..)))).	189	34.2	-68.5	1	221	216.5	185	235.5	130	45	28	58	427	216	117	103	129	287.5	327	103	183.5	159.5	80	101	112	240.5	200.5	243.5	92	94
11	18	ahy-miR156b-3p_R+1_2ss9AT10GT	GCTCTCTATTCTTCTGTCATCT	22	arahy.Tifrunner.gnm1.Arahy.14	-	142273965	142274157	tagtcatcattaactgtcatgtatgaggagaggaggtatttaggcgtgttgTTGACAGAAGATAGAGAGCACAgatgatgacatgcataaaattagaatgaatatggcattttactcatttgtGCTCTCTATTCTTCTGTCATCAcccttaactttggtctctgtactcatattatatattagttattatgaa	90	ahy-MIR156b,mtr-MIR156f,mtr-MIR156e,mtr-MIR156h,gma-MIR156d,gma-MIR156m,gma-MIR156c,gma-MIR156j,gma-MIR156i,gma-MIR156l,gma-MIR156g,gma-MIR156e,vun-MIR156b,ptc-MIR156i,ptc-MIR156h,ptc-MIR156j,ptc-MIR156g,ptc-MIR156l,ath-MIR157c,ath-MIR157b,ath-MIR157a,ath-MIR157d,mdm-MIR156ab,mdm-MIR156ac,mdm-MIR156aa,mdm-MIR156q,mdm-MIR156s,mdm-MIR156y,mdm-MIR156p,mdm-MIR156r,mdm-MIR156x,mdm-MIR156z,gra-MIR157a,…	ahy-MIR156b	ggaggcactattggtagagttgTTGACAGAAGATAGAGAGCACaaaagatgatatgcatatagatatatatagtctgcattttattcctttgtGCTCTCTAAGCTTCTGTCATCactcttcagcctctatttcta	ahy-miR156b-3p	GCTCTCTAAGCTTCTGTCATC	3'	Diff	gp1a	...((((...((((((....(((((((((((.(((((....(((.(((....(((((((((((((((((((((((((((((.((((.....(((......)))...)))).))).))))))))))))))))).))))))))).))))))..)))))..))))....))))))).......))))))..)))).	189	34.2	-68.5	1	0	0	2.5	0	0	0	0	0	0	0	0	0	0	0	3	0	0	0	0	0	0	0	0	0	0	0
12	19	ahy-miR156b-5p_1ss4AG	TTGGCAGAAGATAGAGAGCAC	21	arahy.Tifrunner.gnm1.Arahy.01	-	21150373	21150468	taTTGTCAGAAGATAGAGAGCACagatgatgacatgcataaaattagaataaatatgccattttactcaattatgctctctattctttctgcattc	71	ahy-MIR156b,mtr-MIR156f,mtr-MIR156e,mtr-MIR156h,gma-MIR156d,gma-MIR156m,gma-MIR156c,gma-MIR156j,gma-MIR156i,gma-MIR156l,gma-MIR156g,vun-MIR156b,ptc-MIR156i,ptc-MIR156h,ptc-MIR156j,ptc-MIR156g,ath-MIR157c,ath-MIR157b,ath-MIR157a,mdm-MIR156ab,mdm-MIR156ac,gra-MIR157a,gra-MIR157b,stu-MIR156c,stu-MIR156b,stu-MIR156d,stu-MIR156a,aly-MIR157a,aly-MIR157b,aly-MIR157c,ppe-MIR156h,ppe-MIR156i,ppe-MIR156g,m…	ahy-MIR156b	ggaggcactattggtagagttgTTGACAGAAGATAGAGAGCACaaaagatgatatgcatatagatatatatagtctgcattttattcctttgtGCTCTCTAAGCTTCTGTCATCactcttcagcctctatttcta	ahy-miR156b-5p	TTGACAGAAGATAGAGAGCAC	5'	Diff	gp1a	...((.((((((((((((((((....((((((.(((((((.............)))).))).))).)))....)))))))))))..)))))))...	90	31.2	-25.5	0.9	5	0	0	5	0	0	0	0	0	6	0	0	5	6	5	6	0	0	0	5	0	0	0	7	0	0
13	20	ahy-miR156b-5p_1ss21CT	TTGACAGAAGATAGAGAGCAT	21	arahy.Tifrunner.gnm1.Arahy.06	-	101862999	101863053	TTGACAGAAGATAGAGAGCACaacctgcatcaaaacacccaggtttgccatcaga	77	ahy-MIR156b,mtr-MIR156f,mtr-MIR156h,mtr-MIR156e,gma-MIR156m,gma-MIR156c,gma-MIR156j,gma-MIR156l,gma-MIR156g,gma-MIR156d,gma-MIR156i,gma-MIR156r,gma-MIR156p,gma-MIR156t,vun-MIR156b,ptc-MIR156h,ptc-MIR156i,ptc-MIR156j,ptc-MIR156g,ath-MIR157b,ath-MIR157c,ath-MIR157a,mdm-MIR156ab,mdm-MIR156ac,gra-MIR157a,gra-MIR157b,stu-MIR156b,stu-MIR156a,stu-MIR156c,stu-MIR156d,aly-MIR157c,aly-MIR157a,aly-MIR157b,p…	ahy-MIR156b	ggaggcactattggtagagttgTTGACAGAAGATAGAGAGCACaaaagatgatatgcatatagatatatatagtctgcattttattcctttgtGCTCTCTAAGCTTCTGTCATCactcttcagcctctatttcta	ahy-miR156b-5p	TTGACAGAAGATAGAGAGCAC	5'	Diff	gp1a	.............((..(((.((((((............)))))))))..))...	39	45.5	-10.6	0.4	33.5	24	20	39	19.5	0	4.5	8	60.5	18.5	15.5	23.5	9.5	26	35	27	113.5	29.5	27	18.5	22.5	28.5	59.5	40	12.5	13
14	21	ahy-miR156b-5p_1ss21CT	TTGACAGAAGATAGAGAGCAT	21	arahy.Tifrunner.gnm1.Arahy.16	-	133172046	133172100	TTGACAGAAGATAGAGAGCACaacctgcatcaaagcacccaggtttgccatcaga	77	ahy-MIR156b,mtr-MIR156f,mtr-MIR156h,mtr-MIR156e,gma-MIR156m,gma-MIR156c,gma-MIR156j,gma-MIR156l,gma-MIR156g,gma-MIR156d,gma-MIR156i,gma-MIR156r,gma-MIR156p,gma-MIR156t,vun-MIR156b,ptc-MIR156h,ptc-MIR156i,ptc-MIR156j,ptc-MIR156g,ath-MIR157b,ath-MIR157c,ath-MIR157a,mdm-MIR156ab,mdm-MIR156ac,gra-MIR157a,gra-MIR157b,stu-MIR156b,stu-MIR156a,stu-MIR156c,stu-MIR156d,aly-MIR157c,aly-MIR157a,aly-MIR157b,p…	ahy-MIR156b	ggaggcactattggtagagttgTTGACAGAAGATAGAGAGCACaaaagatgatatgcatatagatatatatagtctgcattttattcctttgtGCTCTCTAAGCTTCTGTCATCactcttcagcctctatttcta	ahy-miR156b-5p	TTGACAGAAGATAGAGAGCAC	5'	Diff	gp1a	.............((..(((.((((((............)))))))))..))...	39	47.3	-10.6	0.4	33.5	24	20	39	19.5	0	4.5	8	60.5	18.5	15.5	23.5	9.5	26	35	27	113.5	29.5	27	18.5	22.5	28.5	59.5	40	12.5	13
15	22	ahy-miR156b-5p_L+1	CTTGACAGAAGATAGAGAGCAC	22	arahy.Tifrunner.gnm1.Arahy.16	-	7023722	7023770	tttggCTTGACAGAAGAGAGAGAGCACagcttgagtctgctacgccggc	57	ahy-MIR156b,mtr-MIR156f,mtr-MIR156h,mtr-MIR156e,gma-MIR156m,gma-MIR156c,gma-MIR156j,gma-MIR156l,gma-MIR156g,gma-MIR156d,gma-MIR156i,vun-MIR156b,ptc-MIR156h,ptc-MIR156i,ptc-MIR156j,ptc-MIR156g,ath-MIR157b,ath-MIR157c,ath-MIR157a,mdm-MIR156ab,mdm-MIR156ac,gra-MIR157a,gra-MIR157b,aly-MIR157c,aly-MIR157a,aly-MIR157b,ppe-MIR156h,ppe-MIR156i,vvi-MIR156f,vvi-MIR156i,vvi-MIR156g,nta-MIR156h,nta-MIR156j,n…	ahy-MIR156b	ggaggcactattggtagagttgTTGACAGAAGATAGAGAGCACaaaagatgatatgcatatagatatatatagtctgcattttattcctttgtGCTCTCTAAGCTTCTGTCATCactcttcagcctctatttcta	ahy-miR156b-5p	TTGACAGAAGATAGAGAGCAC	5'	Diff	gp1a	..((((.(..((((.......((((...))))...))))..).))))..	45	55.1	-11	0.4	18	12.5	14.5	20.5	17.5	4	3.5	9	35.5	15	13.5	11	11.5	9.5	19	10.5	8	15	4.5	4	7	16	15	20.5	9.5	10
16	23	ahy-MIR159-p5_1ss9GT	AGGGTCTTTGTGGGTAGAT	19	arahy.Tifrunner.gnm1.Arahy.19	+	135928714	135928851	AGGGTCTTTGTTGGTAGATactagcttttcactcgtttgcaggtaaaatttaaataagatgtaaatttaattattttttctgtaataagtactttctaatatgaacattatgtattaggtggaatgcttatcaactca	1	ahy-MIR159,	ahy-MIR159	agtggagctccttgaagtccaacagagggtcttggtgggtagattgagctgctaagctatggatcccacagtactacccatatataccccattatgcagtggtagttctgcggattccatatcctgggagcttcattacctttccacagatccttaTTTGGATTGAAGGGAGCTCTAcatagcatcctctttctaat	ahy-MIR159-p5	agggtcttggtgggtagat	5'	New	gp1a	.........(((((((......(((.((((((....((((((..(((((((((((.........))))))..)))))..))))))..........(((((((.........))))))))))))).))))))))))...	126	27.5	-24.5	0.6	0	9	0	0	0	0	0	0	6	6	0	0	0	14	0	0	0	0	0	0	0	23	0	0	0	0
17	24	ahy-MIR159-p5_1ss20CT	AGCTGCTAAGCTATGGATCTC	21	arahy.Tifrunner.gnm1.Arahy.03	+	136409076	136409272	agtggagctccttgaagtccaacagagggtcttggtgggtggattgAGCTGCTAAGCTATGGATCCCacagtactacccatatataccccattatgcagtggtagttctgcggattccatatcctgggagcttcattacctttccacagatccttaTTTGGATTGAAGGGAGCTCTAcatagcatcctctttctaat	1	ahy-MIR159,	ahy-MIR159	agtggagctccttgaagtccaacagagggtcttggtgggtagattgagctgctaagctatggatcccacagtactacccatatataccccattatgcagtggtagttctgcggattccatatcctgggagcttcattacctttccacagatccttaTTTGGATTGAAGGGAGCTCTAcatagcatcctctttctaat	ahy-MIR159-p5	agctgctaagctatggatccc	5'	New	gp1a	.((((((((((((..(((((((..(((((((((((.(((((.((..((((.(((...((((((..((.(((.((((((((((..........))))....)))))).))).))..))))))...))).))))..)))))))..))).))))))))..)))))))..))))))))))))...................	177	46.2	-84.3	0.9	1604	996	1716	1936	969	260	150	289	3477	968	316	882	623	1607	1632	881	1436	1291	533	381	734	1671	1538	1645	883	627
17	25	ahy-miR159	TTTGGATTGAAGGGAGCTCTA	21	arahy.Tifrunner.gnm1.Arahy.03	+	136409076	136409272	agtggagctccttgaagtccaacagagggtcttggtgggtggattgAGCTGCTAAGCTATGGATCCCacagtactacccatatataccccattatgcagtggtagttctgcggattccatatcctgggagcttcattacctttccacagatccttaTTTGGATTGAAGGGAGCTCTAcatagcatcctctttctaat	1	ahy-MIR159,	ahy-MIR159	agtggagctccttgaagtccaacagagggtcttggtgggtagattgagctgctaagctatggatcccacagtactacccatatataccccattatgcagtggtagttctgcggattccatatcctgggagcttcattacctttccacagatccttaTTTGGATTGAAGGGAGCTCTAcatagcatcctctttctaat	ahy-miR159	TTTGGATTGAAGGGAGCTCTA	3'	Yes	gp1a	.((((((((((((..(((((((..(((((((((((.(((((.((..((((.(((...((((((..((.(((.((((((((((..........))))....)))))).))).))..))))))...))).))))..)))))))..))).))))))))..)))))))..))))))))))))...................	177	46.2	-84.3	0.9	171660	103582	140416	181760	123419	26894	24522	39583	256125	89932	56440	97318	68028	135758	172269	99436	155082	120675	65122	50759	63976	163102	161363	129170	117345	99533
18	26	ahy-miR160-5p	TGCCTGGCTCCCTGAATGCCA	21	arahy.Tifrunner.gnm1.Arahy.14	+	8290941	8291066	aaatattcgaattatgtgtcTGCCTGGCTCCCTGAATGCCAtgtaagttagtttgttaagaaaagattaacaaacgtcttatatgGCATGAAGGGAGTCACGCAGGcgattcattttgaaacatat	1	ahy-MIR160,	ahy-MIR160	aaatattcgaattatgtgtcTGCCTGGCTCCCTGAATGCCAtgtaagttagtttgttaagaaaagattaacaaacgtcttatatgGCATGAAGGGAGTCACGCAGGcgattcattttgaaacatat	ahy-miR160-5p	TGCCTGGCTCCCTGAATGCCA	5'	Yes	gp1a	.....((((((.....(((((((.(((((((((..((((((((((((...(((((((((.......)))))))))..))))))))))))..))))))))).)))))))......))))))......	115	37.3	-60.9	1.3	105	57	101	84	81	27	32	108	85	61	70	93	56	52	57	17	176	37	229	105	193	104	247	177	60	53
18	27	ahy-miR160-3p	GCATGAAGGGAGTCACGCAGG	21	arahy.Tifrunner.gnm1.Arahy.14	+	8290941	8291066	aaatattcgaattatgtgtcTGCCTGGCTCCCTGAATGCCAtgtaagttagtttgttaagaaaagattaacaaacgtcttatatgGCATGAAGGGAGTCACGCAGGcgattcattttgaaacatat	1	ahy-MIR160,	ahy-MIR160	aaatattcgaattatgtgtcTGCCTGGCTCCCTGAATGCCAtgtaagttagtttgttaagaaaagattaacaaacgtcttatatgGCATGAAGGGAGTCACGCAGGcgattcattttgaaacatat	ahy-miR160-3p	GCATGAAGGGAGTCACGCAGG	3'	Yes	gp1a	.....((((((.....(((((((.(((((((((..((((((((((((...(((((((((.......)))))))))..))))))))))))..))))))))).)))))))......))))))......	115	37.3	-60.9	1.3	26	16	35	11	13	30	12	74	32	29	71	78	58	35	25	25	57	29	79	31	161	16	82	245	72	52
19	28	ahy-miR167-5p_R+1	TGAAGCTGCCAGCATGATCTTA	22	arahy.Tifrunner.gnm1.Arahy.09	-	110335471	110335588	gatcatgcaccactacaagtTGAAGCTGCCAGCATGATCTTAactttccctctcctatgatttgttggggtgagatcaGATCATGTGGCAGTTTCACCtagttgttggaagcatgaat	1	ahy-MIR167,	ahy-MIR167	gatcatgcaccactacaagtTGAAGCTGCCAGCATGATCTTaactttccctctcctatgatttgttggggtgagatcAGATCATGTGGCAGTTTCACCtagttgttggaagcatgaat	ahy-miR167-5p	TGAAGCTGCCAGCATGATCTT	5'	Diff	gp1a	..((((((.((((.((.((.(((((((((((.((((((((....((((((((..............)))).))))..))))))))))))))))))).)).)).)).))..))))))..	114	44.1	-48.5	0.9	1399	1053	1375	2142	1240	297	246	690	2459	795	1056	896	618	801	1166	533	1491	609	563	435	540	1594	1741	1744	609	774
19	29	ahy-miR167-3p_L-1	GATCATGTGGCAGTTTCACC	20	arahy.Tifrunner.gnm1.Arahy.09	-	110335471	110335588	gatcatgcaccactacaagtTGAAGCTGCCAGCATGATCTTAactttccctctcctatgatttgttggggtgagatcaGATCATGTGGCAGTTTCACCtagttgttggaagcatgaat	1	ahy-MIR167,	ahy-MIR167	gatcatgcaccactacaagtTGAAGCTGCCAGCATGATCTTaactttccctctcctatgatttgttggggtgagatcAGATCATGTGGCAGTTTCACCtagttgttggaagcatgaat	ahy-miR167-3p	AGATCATGTGGCAGTTTCACC	3'	Diff	gp1a	..((((((.((((.((.((.(((((((((((.((((((((....((((((((..............)))).))))..))))))))))))))))))).)).)).)).))..))))))..	114	44.1	-48.5	0.9	335	151	295	502	265	113	75	165	537	174	312	274	208	182	157	90	575	205	199	126	187	390	535	698	348	239
20	30	ahy-miR394	TTGGCATTCTGTCCACCTCC	20	arahy.Tifrunner.gnm1.Arahy.06	+	20015306	20015459	atcatcatgtgggtttagcaaagagttgcttacagagtttaTTGGCATTCTGTCCACCTCCtttcctttctatcttttccttagctgagggaggaggtgggcatgctgccaactgagttctgttgccttctctttgtaaatccctcctgatatc	43	ahy-MIR394,gma-MIR394e,gma-MIR394d,gma-MIR394g,gma-MIR394f,gma-MIR394b,gma-MIR394a,gma-MIR394c,ptc-MIR394a,ptc-MIR394b,ath-MIR394b,ath-MIR394a,mdm-MIR394b,mdm-MIR394a,stu-MIR384,aly-MIR394b,aly-MIR394a,ppe-MIR394a,ppe-MIR394b,mes-MIR394c,mes-MIR394a,mes-MIR394b,vvi-MIR394b,vvi-MIR394a,vvi-MIR394c,nta-MIR394,csi-MIR394b,csi-MIR394a,lus-MIR394a,lus-MIR394b,cme-MIR394a,cme-MIR394b,fve-MIR394,sly-MIR…	ahy-MIR394	aggcattgttccatagccattTTGGCATTCTGTCCACCTCCgatccgatccgattcgggaggtggccagtaggccaaacgggttctgtgaatatgt	ahy-miR394	TTGGCATTCTGTCCACCTCC	5'	Yes	gp1a	...((((...(((....((((((((..((..(((((..(((((((((...(((((((((((((.((((.(((.........)))..)))))))))))))))))...)))))).)))..))))).))...))))))))....)))...))))...	148	44.8	-66.5	1	240	210.5	260.5	274	204	38	35.5	46	663.5	118	58.5	127	101.5	163	202.5	112.5	220	165	97	69	95.5	390.5	233	438	162.5	143.5
21	31	ahy-miR394_1ss20CT	TTGGCATTCTGTCCACCTCT	20	arahy.Tifrunner.gnm1.Arahy.17	-	105846507	105846682	gattgtgtttgttcacgttgggcttaacaaagcgttgcttacagagtttaTTGGCATTCTGTCCACCTCCtccgatcttcattctttttgacatcaaaattcttgggaggtggacatactgccaacagAGTTCTGTTAGCTTCTCTTTGtaaaaactcttcgtgatatatacatgt	43	ahy-MIR394,gma-MIR394e,gma-MIR394d,gma-MIR394g,gma-MIR394f,gma-MIR394b,gma-MIR394a,gma-MIR394c,ptc-MIR394a,ptc-MIR394b,ath-MIR394b,ath-MIR394a,mdm-MIR394b,mdm-MIR394a,stu-MIR384,aly-MIR394b,aly-MIR394a,ppe-MIR394a,ppe-MIR394b,mes-MIR394c,mes-MIR394a,mes-MIR394b,vvi-MIR394b,vvi-MIR394a,vvi-MIR394c,nta-MIR394,csi-MIR394b,csi-MIR394a,lus-MIR394a,lus-MIR394b,cme-MIR394a,cme-MIR394b,fve-MIR394,sly-MIR…	ahy-MIR394	aggcattgttccatagccattTTGGCATTCTGTCCACCTCCgatccgatccgattcgggaggtggccagtaggccaaacgggttctgtgaatatgt	ahy-miR394	TTGGCATTCTGTCCACCTCC	5'	Diff	gp1a	...(((((....(((((..(((....((((((....(((.(((((((((.((((((...((((((((((((..((.......)).(((((....))))).....))))))))))))...)))))).))).)))))).)))....)))))).....)))..)))))...)))))...	170	39.8	-62	0.9	6.5	0	0	0	0	0	0	0	2.5	0	0	0	0	0	0	0	0	0	0	0	0	0	3	3.5	0	0
22	32	ahy-miR394	TTGGCATTCTGTCCACCTCC	20	arahy.Tifrunner.gnm1.Arahy.03	+	136975419	136975582	tggtgccctctagggtttgtcagaggcattgttccatagccattTTGGCATTCTGTCCACCTCCgatccgatccgattcaatccattaatttgtaggaggtggccagtaggccaaacgggttctgtgaatatgtatttgacaaaccccatcttagagggcaagc	43	ahy-MIR394,gma-MIR394d,gma-MIR394f,gma-MIR394b,gma-MIR394e,gma-MIR394g,gma-MIR394a,gma-MIR394c,ptc-MIR394a,ptc-MIR394b,ath-MIR394b,ath-MIR394a,mdm-MIR394a,mdm-MIR394b,stu-MIR384,aly-MIR394b,aly-MIR394a,ppe-MIR394b,ppe-MIR394a,mes-MIR394c,mes-MIR394a,mes-MIR394b,vvi-MIR394b,vvi-MIR394a,vvi-MIR394c,nta-MIR394,csi-MIR394b,csi-MIR394a,lus-MIR394a,lus-MIR394b,cme-MIR394a,cme-MIR394b,fve-MIR394,sly-MIR…	ahy-MIR394	aggcattgttccatagccattTTGGCATTCTGTCCACCTCCgatccgatccgattcgggaggtggccagtaggccaaacgggttctgtgaatatgt	ahy-miR394	TTGGCATTCTGTCCACCTCC	5'	Yes	gp1a	...(((((((((((((((((((((..(((.((((((.((((..((((((...(((.((((((((.....((......))....((......))..)))))))).)))...))))))..)))).)).)))))))..)))))))))))).....)))))))))...	158	48.2	-75.9	1	240	210.5	260.5	274	204	38	35.5	46	663.5	118	58.5	127	101.5	163	202.5	112.5	220	165	97	69	95.5	390.5	233	438	162.5	143.5
23	33	ahy-miR394_L+1	TTTGGCATTCTGTCCACCTCC	21	arahy.Tifrunner.gnm1.Arahy.13	+	139777921	139778084	tggtgccctctagggtttgtcagaggcattgttccatagccatTTTGGCATTCTGTCCACCTCCgatccgatccgattcgattcattaatttgtaggaggtggccagtaggccaaacgggttctgtgaatatgtatttgacaaaccccatcttagagggcaagc	22	ahy-MIR394,gma-MIR394d,gma-MIR394f,gma-MIR394e,ptc-MIR394a,ath-MIR394b,ath-MIR394a,mdm-MIR394a,mdm-MIR394b,aly-MIR394b,aly-MIR394a,ppe-MIR394b,mes-MIR394c,vvi-MIR394a,vvi-MIR394c,nta-MIR394,csi-MIR394b,sly-MIR394,bna-MIR394b,bna-MIR394a,cas-MIR394,ghr-MIR394b,	ahy-MIR394	aggcattgttccatagccattTTGGCATTCTGTCCACCTCCgatccgatccgattcgggaggtggccagtaggccaaacgggttctgtgaatatgt	ahy-miR394	TTGGCATTCTGTCCACCTCC	5'	Diff	gp1a	...(((((((((((((((((((((..(((.((((((.((((..((((((...(((.((((((((....(((......)))...((......))..)))))))).)))...))))))..)))).)).)))))))..)))))))))))).....)))))))))...	158	48.2	-77.8	1	4	4.5	8.5	10.5	2.5	0	0	0	7.5	0	0	0	5	3.5	4.5	0	16	4	2.5	4.5	2.5	6	9.5	6	3.5	5.5
24	34	ahy-miR394_1ss20CT	TTGGCATTCTGTCCACCTCT	20	arahy.Tifrunner.gnm1.Arahy.20	-	11291498	11291642	ttagggtttctcaggtgtcatgttccatagacattTTGGCATTCTGTCCACCTCCattattgttagctgctaacattctttgtagcattcggaggtagccagtatgccaaacaggctctgtgaacttgtctctgagaagcctctt	43	ahy-MIR394,gma-MIR394g,gma-MIR394d,gma-MIR394f,gma-MIR394b,gma-MIR394e,gma-MIR394a,gma-MIR394c,ptc-MIR394a,ptc-MIR394b,ath-MIR394b,ath-MIR394a,mdm-MIR394b,mdm-MIR394a,stu-MIR384,aly-MIR394b,aly-MIR394a,ppe-MIR394a,ppe-MIR394b,mes-MIR394c,mes-MIR394a,mes-MIR394b,vvi-MIR394a,vvi-MIR394b,vvi-MIR394c,nta-MIR394,csi-MIR394b,csi-MIR394a,lus-MIR394b,lus-MIR394a,cme-MIR394a,cme-MIR394b,fve-MIR394,sly-MIR…	ahy-MIR394	aggcattgttccatagccattTTGGCATTCTGTCCACCTCCgatccgatccgattcgggaggtggccagtaggccaaacgggttctgtgaatatgt	ahy-miR394	TTGGCATTCTGTCCACCTCC	5'	Diff	gp1a	...((((((((((((...((.((((.(((((...((((((((.(((...((((((..((....))(((((...........)))))....))))))...))).)))))))).....))))))))).))..))))))))))))...	139	44.1	-54.1	0.8	6.5	0	0	0	0	0	0	0	2.5	0	0	0	0	0	0	0	0	0	0	0	0	0	3	3.5	0	0
25	35	ahy-MIR398-p5_1ss8CA	GAGTGAAACTGAGAACACAAAG	22	arahy.Tifrunner.gnm1.Arahy.19	-	137958040	137958192	tatctcagagGAGTGAAACTGAGAACACAAAGtaaattgtttcggagtttggaatgccataatcacatgcataatgcatttatgcttatgcttgtatatggtacatattttcgaattttaatttaccTTGTGTTCTCAGGTCACCCCTttgag	1	ahy-MIR398,	ahy-MIR398	tatctcagaggagtgaacctgagaacacaaagtaaattgtttcggagtttggaatgccataatcacatgcataatgcatttatgcttatgcttgtatatggtacatattttcgaattttaatttacctTGTGTTCTCAGGTCACCCCTttgag	ahy-MIR398-p5	gagtgaacctgagaacacaaag	5'	New	gp1a	...((((((((.((((..((((((((((((.((((((((.(((((((..((...(((((((...(((.((((((.(((....))))))))).))).)))))))))...)))))))...)))))))).)))))))))))).)))).))))))))	150	35.3	-65.4	1.2	94	0	0	36	12	5	0	80	0	0	10	0	0	0	19	0	43	0	9	82	16	24	89	0	0	21
25	36	ahy-miR398_L+1	TTGTGTTCTCAGGTCACCCCT	21	arahy.Tifrunner.gnm1.Arahy.19	-	137958040	137958192	tatctcagagGAGTGAAACTGAGAACACAAAGtaaattgtttcggagtttggaatgccataatcacatgcataatgcatttatgcttatgcttgtatatggtacatattttcgaattttaatttaccTTGTGTTCTCAGGTCACCCCTttgag	1	ahy-MIR398,	ahy-MIR398	tatctcagaggagtgaacctgagaacacaaagtaaattgtttcggagtttggaatgccataatcacatgcataatgcatttatgcttatgcttgtatatggtacatattttcgaattttaatttacctTGTGTTCTCAGGTCACCCCTttgag	ahy-miR398	TGTGTTCTCAGGTCACCCCT	3'	Diff	gp1a	...((((((((.((((..((((((((((((.((((((((.(((((((..((...(((((((...(((.((((((.(((....))))))))).))).)))))))))...)))))))...)))))))).)))))))))))).)))).))))))))	150	35.3	-65.4	1.2	61	0	5	16	6	0	7	32	0	0	0	0	0	0	0	0	7	0	9	30	18	5	55	0	0	5
26	37	ahy-MIR408-p5_2ss18GT19GT	TGCACTGCCTCTTCCCTTT	19	arahy.Tifrunner.gnm1.Arahy.17	-	124858347	124858493	ccataaccataagtaaagaTGCACTGCCTCTTCCCTTAgacatttttgtatgtactctccaaagtgatgcagatcttggctataattaacaatataagtagcagattgaaggtgaaagattctgtgtgtgtttttgtaaggttgaaa	29	ahy-MIR408,mtr-MIR408,gma-MIR408b,gma-MIR408c,gma-MIR408d,gma-MIR408a,vun-MIR408,ptc-MIR408,ath-MIR408,mdm-MIR408a,mdm-MIR408b,mdm-MIR408d,stu-MIR408b,aly-MIR408,mes-MIR408,vvi-MIR408,nta-MIR408,csi-MIR408,lus-MIR408a,cme-MIR408,fve-MIR408,sly-MIR408,cas-MIR408,cpa-MIR408,rco-MIR408,cca-MIR408,hbr-MIR408b,hbr-MIR408a,dpr-MIR408,	ahy-MIR408	gaagaagagatgacaaagaaCTGGGAACAGGCAGAGCATGAatggaactatcaatagacacattttgttcattgacgctcATGCACTGCCTCTTCCCTGGCtctctctttctttttccttct	ahy-MIR408-p5	TGCACTGCCTCTTCCCTGG	5'	New	gp1a	...(((((.((...(((.(..(((....(((((((((...((..(((((((.((((......)))))))))))...))(((((..............)))))......)))).))).))....)))..).)))...)).)))))...	141	35.4	-29.8	0.6	5.5	4	0	3.5	0	0	0	0	6	0	3	7.5	0	0	4	0	0	0	3.5	0	0	0	0	4	0	0
27	38	ahy-MIR408-p3_2ss18GT19GT	TGCACTGCCTCTTCCCTTT	19	arahy.Tifrunner.gnm1.Arahy.08	-	9319432	9319489	taagagggatcaaggtggccataaccataagtaaagaTGCACTGCCTCTTCCCTTAga	29	ahy-MIR408,mtr-MIR408,gma-MIR408b,gma-MIR408c,gma-MIR408d,gma-MIR408a,vun-MIR408,ptc-MIR408,ath-MIR408,mdm-MIR408a,mdm-MIR408b,mdm-MIR408d,stu-MIR408b,aly-MIR408,mes-MIR408,vvi-MIR408,nta-MIR408,csi-MIR408,lus-MIR408a,cme-MIR408,fve-MIR408,sly-MIR408,cas-MIR408,cpa-MIR408,rco-MIR408,cca-MIR408,hbr-MIR408a,hbr-MIR408b,dpr-MIR408,	ahy-MIR408	gaagaagagatgacaaagaaCTGGGAACAGGCAGAGCATGAatggaactatcaatagacacattttgttcattgacgctcATGCACTGCCTCTTCCCTGGCtctctctttctttttccttct	ahy-MIR408-p3	TGCACTGCCTCTTCCCTGG	3'	New	gp1a	...((((((...(((..(.(((..............)))..)..)))..))))))...	52	44.8	-14.4	0.6	5.5	4	0	3.5	0	0	0	0	6	0	3	7.5	0	0	4	0	0	0	3.5	0	0	0	0	4	0	0
28	39	ahy-miR408-3p_L-1R+1_1	TGCACTGCCTCTTCCCTGGCA	21	arahy.Tifrunner.gnm1.Arahy.19	-	24698267	24698428	ttaagagataaagacaaagctagggatgagatagagcatggatggggctatcaacagaaaagaataatgaagaaagaagctaagaggagaaaagaaagaaatttgttgtggcttcgttcaTGCACTGCCTCTTCCCTGGCTttggctcttttcttctctatt	27	ahy-MIR408,mtr-MIR408,gma-MIR408c,gma-MIR408a,gma-MIR408b,gma-MIR408d,vun-MIR408,ptc-MIR408,ath-MIR408,mdm-MIR408a,stu-MIR408b,aly-MIR408,mes-MIR408,vvi-MIR408,nta-MIR408,csi-MIR408,lus-MIR408a,cme-MIR408,fve-MIR408,sly-MIR408,cas-MIR408,cpa-MIR408,rco-MIR408,cca-MIR408,hbr-MIR408a,hbr-MIR408b,dpr-MIR408,	ahy-MIR408	gaagaagagatgacaaagaaCTGGGAACAGGCAGAGCATGAatggaactatcaatagacacattttgttcattgacgctcATGCACTGCCTCTTCCCTGGCtctctctttctttttccttct	ahy-miR408-3p	ATGCACTGCCTCTTCCCTGGC	3'	Diff	gp1a	...(((((.(((((((((((((((((.(((..((.(((((((((..((((.(((((((...........................................)))))))))))..))))))))).))..))).))))))))))))..)))))...)))))...	156	39.5	-61.512	1	463.5	154	174	184.5	165	238.5	216	446.5	442	101	310.5	501	234.5	114	275	97.5	494.5	64.5	658.5	435.5	373.5	232	264.5	454	347.5	224.5
29	40	ahy-miR408-3p_L-1R+1_2	TGCACTGCCTCTTCCCTGGCT	21	arahy.Tifrunner.gnm1.Arahy.09	-	19224977	19225138	ttaagagataaagacaaagctagggatgagatagagcatggatggggctatcaacagaaaagaataatgaagaaagaagctgagaggagaaaagaaagaaatttgttgcggcttcgttcaTGCACTGCCTCTTCCCTGGCTttggctcttttcttctctatt	29	ahy-MIR408,mtr-MIR408,gma-MIR408b,gma-MIR408c,gma-MIR408d,gma-MIR408a,vun-MIR408,ptc-MIR408,ath-MIR408,mdm-MIR408a,mdm-MIR408b,mdm-MIR408d,stu-MIR408b,aly-MIR408,mes-MIR408,vvi-MIR408,nta-MIR408,csi-MIR408,lus-MIR408a,cme-MIR408,fve-MIR408,sly-MIR408,cas-MIR408,cpa-MIR408,rco-MIR408,cca-MIR408,hbr-MIR408a,hbr-MIR408b,dpr-MIR408,	ahy-MIR408	gaagaagagatgacaaagaaCTGGGAACAGGCAGAGCATGAatggaactatcaatagacacattttgttcattgacgctcATGCACTGCCTCTTCCCTGGCtctctctttctttttccttct	ahy-miR408-3p	ATGCACTGCCTCTTCCCTGGC	3'	Diff	gp1a	...(((((.(((((((((((((((((.(((..((.(((((((((..(((..((((........................((....)).......(((....))))))).)))..))))))))).))..))).))))))))))))..)))))...)))))...	156	40.7	-60.3	0.9	463.5	154	174	184.5	165	238.5	216	446.5	442	101	310.5	501	234.5	114	275	97.5	494.5	64.5	658.5	435.5	373.5	232	264.5	454	347.5	224.5
30	41	ahy-miR3508_2ss20CT21AT	TAGAGGGTCCCCATGTTCTTT	21					aggcaaaattctcctatctttgaggacacaggcgaatcctctattctctcttctgcactgccgcctcgtaaatcactactgtgatgtggtgtgagcaaagaagaaTAGAGGGTCCCCATGTTCTCAtaanttggactgagtnttac	1	ahy-MIR3508,	ahy-MIR3508	aggcaaaattctcctatctttgaggacacaggcgaatcctctattctctcttctgcactgccgcctcgtaaatcactactgtgatgtggtgtgagcaaagaagaaTAGAGGGTCCCCATGTTCTCAtaanttggactgagtnttac	ahy-miR3508	TAGAGGGTCCCCATGTTCTCA	3'	Diff	gp1a	....((.(((((((......((((((((..((.(.((((((((((((.((((...(((.(((((.......(((((....)))))))))))))....)))))))))))))))))))..))))))))......)))..)))).))..	140	44.5	-50.9	0.8	13	0	0	0	5	0	0	0	0	0	0	0	0	0	0	0	0	0	0	0	0	5	7	6	0	0
31	42	ahy-MIR3508-p5	TCTATTCTCTCTTCTGCACTGCC	23	arahy.Tifrunner.gnm1.Arahy.20	-	5012228	5012374	tatctttgaggacacggcgaatccTCTATTCTCTCTTCTGCACTGCCgcctcgtaaatcactactgtgatgttagtgttttttattgggcctaggcccagtggtgtgtagcaaagcagaaTAGAGGGTCCCCATGTTCTCAtagttg	1	ahy-MIR3508,	ahy-MIR3508	aggcaaaattctcctatctttgaggacacaggcgaatcctctattctctcttctgcactgccgcctcgtaaatcactactgtgatgtggtgtgagcaaagaagaaTAGAGGGTCCCCATGTTCTCAtaanttggactgagtnttac	ahy-MIR3508-p5	tctattctctcttctgcactgcc	5'	New	gp1a	...((.((((((((.((.(.((((((((((((((...((((((.(((((.......(((((....)))))...............(((((....))))))))))))))))...)).))))))))))))).)).)))))))).))...	141	46.9	-61.2	0.9	0	3	0	0	0	0	0	0	0	0	0	0	0	0	0	0	0	0	0	0	0	0	0	0	0	0
31	43	ahy-miR3508	TAGAGGGTCCCCATGTTCTCA	21	arahy.Tifrunner.gnm1.Arahy.20	-	5012228	5012374	tatctttgaggacacggcgaatccTCTATTCTCTCTTCTGCACTGCCgcctcgtaaatcactactgtgatgttagtgttttttattgggcctaggcccagtggtgtgtagcaaagcagaaTAGAGGGTCCCCATGTTCTCAtagttg	1	ahy-MIR3508,	ahy-MIR3508	aggcaaaattctcctatctttgaggacacaggcgaatcctctattctctcttctgcactgccgcctcgtaaatcactactgtgatgtggtgtgagcaaagaagaaTAGAGGGTCCCCATGTTCTCAtaanttggactgagtnttac	ahy-miR3508	TAGAGGGTCCCCATGTTCTCA	3'	Yes	gp1a	...((.((((((((.((.(.((((((((((((((...((((((.(((((.......(((((....)))))...............(((((....))))))))))))))))...)).))))))))))))).)).)))))))).))...	141	46.9	-61.2	0.9	2190	298	458.5	522.5	792	755.5	730.5	1115.5	604.5	358.5	805	810.5	366.5	320	495.5	204.5	1865.5	195	1813.5	1402.5	981.5	668.5	1046	607.5	423	544
32	44	ahy-MIR3508-p5	TCTATTCTCTCTTCTGCACTGCC	23	arahy.Tifrunner.gnm1.Arahy.10	-	2838113	2838264	ttctcctatctttgaggacacggcgaatccTCTATTCTCTCTTCTGCACTGCCgcctcgtaaatcactactgtgatagttttttattgggcctaggcccagtggtgtgagcaaagaagaaTAGAGGGTCCCCATGTTCTCAtagttggactg	1	ahy-MIR3508,	ahy-MIR3508	aggcaaaattctcctatctttgaggacacaggcgaatcctctattctctcttctgcactgccgcctcgtaaatcactactgtgatgtggtgtgagcaaagaagaaTAGAGGGTCCCCATGTTCTCAtaanttggactgagtnttac	ahy-MIR3508-p5	tctattctctcttctgcactgcc	5'	New	gp1a	...(((...((.((((((((.((.(.((((((((((((.((((...(((.(((((.......(((((....)))))..........(((((....)))))))))))))....))))))))))))))))).)).)))))))).))..)))...	146	47.4	-62	0.9	0	3	0	0	0	0	0	0	0	0	0	0	0	0	0	0	0	0	0	0	0	0	0	0	0	0
32	45	ahy-miR3508	TAGAGGGTCCCCATGTTCTCA	21	arahy.Tifrunner.gnm1.Arahy.10	-	2838113	2838264	ttctcctatctttgaggacacggcgaatccTCTATTCTCTCTTCTGCACTGCCgcctcgtaaatcactactgtgatagttttttattgggcctaggcccagtggtgtgagcaaagaagaaTAGAGGGTCCCCATGTTCTCAtagttggactg	1	ahy-MIR3508,	ahy-MIR3508	aggcaaaattctcctatctttgaggacacaggcgaatcctctattctctcttctgcactgccgcctcgtaaatcactactgtgatgtggtgtgagcaaagaagaaTAGAGGGTCCCCATGTTCTCAtaanttggactgagtnttac	ahy-miR3508	TAGAGGGTCCCCATGTTCTCA	3'	Yes	gp1a	...(((...((.((((((((.((.(.((((((((((((.((((...(((.(((((.......(((((....)))))..........(((((....)))))))))))))....))))))))))))))))).)).)))))))).))..)))...	146	47.4	-62	0.9	2190	298	458.5	522.5	792	755.5	730.5	1115.5	604.5	358.5	805	810.5	366.5	320	495.5	204.5	1865.5	195	1813.5	1402.5	981.5	668.5	1046	607.5	423	544
33	46	ahy-miR3509-5p_L+1R+1_1ss6TC_1	AATACCTGAGAGCCGTTAGATGAA	24	arahy.Tifrunner.gnm1.Arahy.14	+	906590	906741	aacaaggtgaaaactcaggtgcagtcgacttcacgtgaagttAATACCTGAGAGCCGTTAGATGAAaatttagtcaaattagtcaaatcatttaacggctctcaagtatcaacttcacgtaaagtcaacttcatttgagtttttaccttcaa	1	ahy-MIR3509,	ahy-MIR3509	tcgacttcacgttgaagttgaATACTTGAGAGCCGTTAGATGAtttgattgatttgactaaattttcATCTAACGACTCTCAGATATCAacttcacgtgaagtcaacttcacctgagttttcaccttaatacaaaaatagaattag	ahy-miR3509-5p	ATACTTGAGAGCCGTTAGATGA	5'	Diff	gp1a	...((((((((((((((..((.(((.(((((.((((((((((.((((.(((((((((((((((((....(((((...))))).....))))))))))))))))).)))).)))))))))).))))).))).))..))))))))))))))...	146	36.2	-79	1.4	18	8	23	21	14	0	0	8	27	13	0	11	0	16	19	0	11	7	5	8	8	9	9	13	10	10
34	47	ahy-miR3509-5p_L+1R+1_1ss5CG	AATAGTTGAGAGCCGTTAGATGAA	24	arahy.Tifrunner.gnm1.Arahy.10	+	113503344	113503406	gaagttAATAGTTGAGAGCCGTTAGATGAAaatttagtcaaatcagtctcagttatcaacttt	1	ahy-MIR3509,	ahy-MIR3509	tcgacttcacgttgaagttgaATACTTGAGAGCCGTTAGATGAtttgattgatttgactaaattttcATCTAACGACTCTCAGATATCAacttcacgtgaagtcaacttcacctgagttttcaccttaatacaaaaatagaattag	ahy-miR3509-5p	ATACTTGAGAGCCGTTAGATGA	5'	Diff	gp1a	((((((.(((..(((((...(((.(((.........))).)))...)))))..))).))))))	63	31.7	-12.7	0.6	0	0	0	0	0	0	0	0	3.5	0	0	0	0	0	2.5	0	2.5	0	0	0	3	0	0	0	0	2.5
35	48	ahy-miR3509-5p_L+1R+1_1ss5CG	AATAGTTGAGAGCCGTTAGATGAA	24	arahy.Tifrunner.gnm1.Arahy.10	+	2478311	2478456	taggtgaaaactcaggtgcagttgacttcacgtgaagttAATAGTTGAGAGCCGTTAGATGAAaatttagtcaaataagtcaaattatctaacagctctcagttatcaacttcacgtgaagtcgactgcacctaagtttctataaa	1	ahy-MIR3509,	ahy-MIR3509	tcgacttcacgttgaagttgaATACTTGAGAGCCGTTAGATGAtttgattgatttgactaaattttcATCTAACGACTCTCAGATATCAacttcacgtgaagtcaacttcacctgagttttcaccttaatacaaaaatagaattag	ahy-miR3509-5p	ATACTTGAGAGCCGTTAGATGA	5'	Diff	gp1a	...((..(((((.((((((((((((((((((((((((((.(((..(((((((.(((((((((..(((((......)))))....))))))))).)))))))..))).)))))))))))))))))))))))))).)))))..))...	140	36.3	-80	1.5	0	0	0	0	0	0	0	0	3.5	0	0	0	0	0	2.5	0	2.5	0	0	0	3	0	0	0	0	2.5
36	49	ahy-miR3509-5p_L+1R+1_1ss6TC_2	AATACCTGAGAGCCGTTAGATGAT	24	arahy.Tifrunner.gnm1.Arahy.07	+	7598935	7599155	tattagttaacattttgaattaatattttattttatatttggtggaaattagggtgcagtcgacttcacgtgaagttAATACCTGAGAGCCGTTAGATGATttgactgatttaactaaatttttatctaacggttctcaaatatcaactttatgtgaagtcgacttcacctggattttcacctttatatttttaaaatttagaattaaaaatttactattt	1	ahy-MIR3509,	ahy-MIR3509	tcgacttcacgttgaagttgaATACTTGAGAGCCGTTAGATGAtttgattgatttgactaaattttcATCTAACGACTCTCAGATATCAacttcacgtgaagtcaacttcacctgagttttcaccttaatacaaaaatagaattag	ahy-miR3509-5p	ATACTTGAGAGCCGTTAGATGA	5'	Diff	gp1a	...((((....(((((.((((...((((((...((((...(((((((((..(((((.((((((((((((((((((((.(((..(((((((((((((((((......................)))))))))))))))))..))).)))))))))))))))))))).)))))..)))))))))..))))....))))))....)))).)))))..))))...	215	26.7	-87.4	1.5	18	8	23	21	14	0	0	8	27	13	0	11	0	16	19	0	11	7	5	8	8	9	9	13	10	10
37	50	ahy-MIR3509-p5_1ss20AG	ACTAAATTTTCATCTAACGGCTCT	24	arahy.Tifrunner.gnm1.Arahy.07	+	3120935	3121067	tcgacttcacgtgaagttgatacttgagagccgttagatgatttgattgatttgACTAAATTTTCATCTAACGACTCTcagatatcaACTTCACGTGAAGTCAACTTCACCtgagttttcaccttaatcaaaa	1	ahy-MIR3509,	ahy-MIR3509	tcgacttcacgttgaagttgaATACTTGAGAGCCGTTAGATGAtttgattgatttgactaaattttcATCTAACGACTCTCAGATATCAacttcacgtgaagtcaacttcacctgagttttcaccttaatacaaaaatagaattag	ahy-MIR3509-p5	actaaattttcATCTAACGACTCT	5'	New	gp1a	..((((((((((((((((((((..((((((.((((((((((...((((..........)))).)))))))))).))))))..))))))))))))))))))))...............................	100	36.1	-58.7	1.2	1685	1228	2911	2496	1762	327	114	520	3658	1772	1346	1018	1617	1356	3211	994	2968	1400	526	832	908	2135	948	2807	1005	1072
37	51	ahy-MIR3509-p3_2ss16AG20TG	ACTTCACGTGAAGTCGACTGCACC	24	arahy.Tifrunner.gnm1.Arahy.07	+	3120935	3121067	tcgacttcacgtgaagttgatacttgagagccgttagatgatttgattgatttgACTAAATTTTCATCTAACGACTCTcagatatcaACTTCACGTGAAGTCAACTTCACCtgagttttcaccttaatcaaaa	1	ahy-MIR3509,	ahy-MIR3509	tcgacttcacgttgaagttgaATACTTGAGAGCCGTTAGATGAtttgattgatttgactaaattttcATCTAACGACTCTCAGATATCAacttcacgtgaagtcaacttcacctgagttttcaccttaatacaaaaatagaattag	ahy-MIR3509-p3	acttcacgtgaagtcaacttcacc	3'	New	gp1a	..((((((((((((((((((((..((((((.((((((((((...((((..........)))).)))))))))).))))))..))))))))))))))))))))...............................	100	36.1	-58.7	1.2	4098	3089	6106	5226	3911	636	339	1137	8211	3788	2507	1976	3560	3012	6075	2100	5822	2837	1417	1669	1781	5630	2607	6970	2416	2366
38	52	ahy-miR3509-5p_L+1R+1_1ss13CT	AATACTTGAGAGTCGTTAGATGAT	24					tcgacttcacgttgaagttgaATACTTGAGAGCCGTTAGATGAtttgattgatttgactaaattttcATCTAACGACTCTCAGATATCAacttcacgtgaagtcaacttcacctgagttttcaccttaatacaaaaatagaattag	1	ahy-MIR3509,	ahy-MIR3509	tcgacttcacgttgaagttgaATACTTGAGAGCCGTTAGATGAtttgattgatttgactaaattttcATCTAACGACTCTCAGATATCAacttcacgtgaagtcaacttcacctgagttttcaccttaatacaaaaatagaattag	ahy-miR3509-5p	ATACTTGAGAGCCGTTAGATGA	5'	Diff	gp1a	..(((((((((.((((((((.(((..((((((.((((((((((...((((..........)))).)))))))))).))))))..))))))))))))))))))))..........................................	102	34.2	-51.1	1	0	0	0	0	0	0	0	0	0	0	0	0	0	0	5	0	0	0	0	0	0	0	0	5	0	0
39	53	ahy-MIR3510-p5_1ss22GT	CCATCTTGCGAGACTGAACGAT	22	arahy.Tifrunner.gnm1.Arahy.16	+	698756	698825	caaatggctggtttataCCATCTTGCGAGACTGAACGAGatttggtttaggttggatgagccattagcta	1	ahy-MIR3510,	ahy-MIR3510	caaatggcttggtTTATACCATCTTGCGAGACTGAacgagattttggttttaggttggatgagccattagcta	ahy-MIR3510-p5	CCATCTTGCGAGACTGAacgag	5'	New	gp1a	....((((((((((((.(((.((((...(((..((.....))..))))))).)))))))))))...))))	66	42.9	-19.4	0.6	40	30	45	78	27	5	0	0	106	14	15	6	5	46	57	20	91	16	6	7	15	38	43	69	15	7
40	54	ahy-MIR3511-p5	TCGAGCCGCCAGGGCCATGAA	21	arahy.Tifrunner.gnm1.Arahy.02	+	101803562	101803644	aaTCGAGCCGCCAGGGCCATGAAtgcagaactgttaaaggaaaaagaacaaacaatgttaCTATGGCATCTGGTAAAGCTTgc	1	ahy-MIR3511,	ahy-MIR3511	aatcgagccGCCAGGGCCATGAATGCAGAactgttaaaggaaaaagaacaaacaaTGTTACTATGGCATCTGGTAAagcttgc	ahy-MIR3511-p5	tcgagccGCCAGGGCCATGAA	5'	New	gp1a	...(((((.((((((((((((...(((....((((...........)))).....)))...)))))).))))))...))))).	79	43.4	-23.9	0.7	118	95	122	119	73	22	0	15	282	63	43	91	75	74	122	52	100	85	58	17	40	99	91	144	48	72
40	55	ahy-MIR3511-p3	CTATGGCATCTGGTAAAGCTT	21	arahy.Tifrunner.gnm1.Arahy.02	+	101803562	101803644	aaTCGAGCCGCCAGGGCCATGAAtgcagaactgttaaaggaaaaagaacaaacaatgttaCTATGGCATCTGGTAAAGCTTgc	1	ahy-MIR3511,	ahy-MIR3511	aatcgagccGCCAGGGCCATGAATGCAGAactgttaaaggaaaaagaacaaacaaTGTTACTATGGCATCTGGTAAagcttgc	ahy-MIR3511-p3	CTATGGCATCTGGTAAagctt	3'	New	gp1a	...(((((.((((((((((((...(((....((((...........)))).....)))...)))))).))))))...))))).	79	43.4	-23.9	0.7	0	0	0	0	0	0	0	0	5	0	0	0	0	0	0	0	0	0	0	0	0	0	0	0	0	0
41	56	ahy-miR3512_R+2	CGCAAATGATGACAAATAGACA	22	arahy.Tifrunner.gnm1.Arahy.01	-	111013518	111013659	gttgaattatagttacgatctctgggttcgttattagtgaaactgaggtagtgtgtgaaaaatccatgtttaagcttgcaaatgcagtatttcttactattCGCAAATGATGACAAATAGACAgggacatcagcactctaag	1	ahy-MIR3512,	ahy-MIR3512	gttgaattatagttacgatctctgggttcgttattagtgaaactgaggtagtgtgtgaaaaatccatgtttaagcttgcaaatgcagtatttcttactattCGCAAATGATGACAAATAGAcgggacatcagcactctaag	ahy-miR3512	CGCAAATGATGACAAATAGA	3'	Diff	gp1a	(((((..((....))...((((((...((((((((.(((((..(((((.((..((.((....))))..))...(((.((....)))))...)))))...))))).))))))))........))))))..)))))........	109	36.6	-25.1	0.5	165	134	233	283	193	29	32	106	229	140	102	50	129	95	219	90	183	102	74	103	127	191	110	234	92	99
42	57	ahy-MIR3513-p5_2ss16AC20TG	AGAAATTGTATAAATCCCGGT	21	arahy.Tifrunner.gnm1.Arahy.07	-	35461707	35461774	atAGAAATTGTATAAATCCCGGTtgatgtgttgttggtgttgttaactgtatttgatttgtgcaagtt	1	ahy-MIR3513,	ahy-MIR3513	tattgtctaattgtaatggattTTAATTTCTGAGTTTGTCATCtgaacttctgttgattgtgttctaaatttctgatgttacatgtgttgttggtttgTTGATAAGATAGAAATTGTATaaataccgttgct	ahy-MIR3513-p5	AGAAATTGTATaaataccgtt	5'	New	gp1a	.......(((((((((((.((((((((..............)))))))).....)))))))))))...	58	32.4	-14.6	0.7	31.5	21	42	31.5	32.5	7	0	8.5	64.5	17.5	26	11.5	15	11	14.5	7.5	17.5	15	0	3	6.5	20.5	9.5	24	11.5	7.5
42	58	ahy-MIR3513-p5_2ss16AC20TG	AGAAATTGTATAAATCCCGGT	21	arahy.Tifrunner.gnm1.Arahy.07	-	35480273	35480340	atAGAAATTGTATAAATCCCGGTtgatgtgttgttggtgttgttaactgtatttgatttgtgcaagtt	1	ahy-MIR3513,	ahy-MIR3513	tattgtctaattgtaatggattTTAATTTCTGAGTTTGTCATCtgaacttctgttgattgtgttctaaatttctgatgttacatgtgttgttggtttgTTGATAAGATAGAAATTGTATaaataccgttgct	ahy-MIR3513-p5	AGAAATTGTATaaataccgtt	5'	New	gp1a	.......(((((((((((.((((((((..............)))))))).....)))))))))))...	58	32.4	-14.6	0.7	31.5	21	42	31.5	32.5	7	0	8.5	64.5	17.5	26	11.5	15	11	14.5	7.5	17.5	15	0	3	6.5	20.5	9.5	24	11.5	7.5
43	59	ahy-MIR3513-p5	TGAACTTCTGTTGATTGTGTT	21	arahy.Tifrunner.gnm1.Arahy.07	+	35459994	35460120	tattgtctaattgtaatggattttaatttctgagtttgtcatcTGAACTTCTGTTGATTGTGTTctaaatttctgaTGTTGCATGTGTTGTTGGTTTgttgataagatagaaattgtataaataccg	1	ahy-MIR3513,	ahy-MIR3513	tattgtctaattgtaatggattTTAATTTCTGAGTTTGTCATCtgaacttctgttgattgtgttctaaatttctgatgttacatgtgttgttggtttgTTGATAAGATAGAAATTGTATaaataccgttgct	ahy-MIR3513-p5	tgaacttctgttgattgtgtt	5'	New	gp1a	.................(((((((((((((((..(((((((...(((((.........(((..((.........))....))).........)))))..))))))).)))))))))...)))).)).	109	29.1	-17.2	0.5	255	305	430	494	408	21	30	83	854	262	216	157	164	157	262	105	273	177	46	29	40	209	129	275	58	71
43	60	ahy-MIR3513-p3_1ss5AG	TGTTGCATGTGTTGTTGGTTT	21	arahy.Tifrunner.gnm1.Arahy.07	+	35459994	35460120	tattgtctaattgtaatggattttaatttctgagtttgtcatcTGAACTTCTGTTGATTGTGTTctaaatttctgaTGTTGCATGTGTTGTTGGTTTgttgataagatagaaattgtataaataccg	1	ahy-MIR3513,	ahy-MIR3513	tattgtctaattgtaatggattTTAATTTCTGAGTTTGTCATCtgaacttctgttgattgtgttctaaatttctgatgttacatgtgttgttggtttgTTGATAAGATAGAAATTGTATaaataccgttgct	ahy-MIR3513-p3	tgttacatgtgttgttggttt	3'	New	gp1a	.................(((((((((((((((..(((((((...(((((.........(((..((.........))....))).........)))))..))))))).)))))))))...)))).)).	109	29.1	-17.2	0.5	846	520	1200	1251	968	76	28	218	1767	684	563	491	487	403	772	234	636	440	149	118	132	511	431	576	257	206
44	61	ahy-miR3514-3p	TCACCGTTAATACAGAATCCTT	22	arahy.Tifrunner.gnm1.Arahy.20	+	10375895	10376086	acaatagaaggattctgtataacggttgacatgagtttatctcgtttttaaagatatctttgcatttcatatgagatttaaagtttttattggtaatataaatctcacatgaaatttaaatttatattttaaagttaagataaagtcatgTCACCGTTAATACAGAATCCTTcaattatatttagtcagggg	1	ahy-MIR3514,	ahy-MIR3514	acaatagaAGGATTCTGTATTAACGGTGGAcatgatttatctcgtttttaaagatatctttgcatttcatatgagatttaaagtttttattggtaatataaatctcacatgaaatttaaatttatattttaaagttaagataaagtcatgTCACCGTTAATACAGAATCCTTcaattatatttagtcagggg	ahy-miR3514-3p	TCACCGTTAATACAGAATCCTT	3'	Yes	gp1a	......((((((((((((((((((((.(((((((.(((((((...(((((((((((..(((..(((((((.(((((((((..................))))))))).)))))))..)))..))).))))))))...))))))).))))))))))))).))))))))))))))...................	167	26	-68.9	1.4	7522	7790	10040	10810	8345	1795	1158	2857	15260	7810	5181	4580	5787	7151	9190	4162	7867	7117	2121	2425	2813	7637	5506	12712	3718	3929
45	62	ahy-MIR3515-p5	TCTCTGCACCTTCCTTTTATG	21	arahy.Tifrunner.gnm1.Arahy.15	-	135468654	135468827	ggaggagaatcaataatgttatttctacatttcattttctatactcatTCTCTGCACCTTCCTTTTATGtatgataaaggaaaaaatataaatttttctattattttgTCATAAAAGTGAGGTGTAGAGTaaaaatgtagaaaatgaacggtataaataacattgatgttgaga	1	ahy-MIR3515,	ahy-MIR3515	ggaggagaatcaataatgttatttctacatttcattttctatactcattctctgcaccttccttttatgtatgataaaggaaaaaatataaatttttctattattttgtcataaaagtgaggtgtagagtaaaAATGTAGAAAATGAACGGTATaaataacattgatgttgaga	ahy-MIR3515-p5	tctctgcaccttccttttatg	5'	New	gp1a	.........(((((((((((((((.(((..(((((((((((((......((((((((((..((((((((...(((((..((((((.......))))))..)))))....))))))))..))))))))))......)))))))))))))..))).)))))))))...))))))..	163	26.4	-61.9	1.3	0	0	0	0	0	0	0	0	0	0	0	0	0	0	0	0	0	0	0	0	5	0	6	0	0	0
45	63	ahy-MIR3515-p3	TCATAAAAGTGAGGTGTAGAGT	22	arahy.Tifrunner.gnm1.Arahy.15	-	135468654	135468827	ggaggagaatcaataatgttatttctacatttcattttctatactcatTCTCTGCACCTTCCTTTTATGtatgataaaggaaaaaatataaatttttctattattttgTCATAAAAGTGAGGTGTAGAGTaaaaatgtagaaaatgaacggtataaataacattgatgttgaga	1	ahy-MIR3515,	ahy-MIR3515	ggaggagaatcaataatgttatttctacatttcattttctatactcattctctgcaccttccttttatgtatgataaaggaaaaaatataaatttttctattattttgtcataaaagtgaggtgtagagtaaaAATGTAGAAAATGAACGGTATaaataacattgatgttgaga	ahy-MIR3515-p3	tcataaaagtgaggtgtagagt	3'	New	gp1a	.........(((((((((((((((.(((..(((((((((((((......((((((((((..((((((((...(((((..((((((.......))))))..)))))....))))))))..))))))))))......)))))))))))))..))).)))))))))...))))))..	163	26.4	-61.9	1.3	20	0	12	0	8	0	0	15	0	0	6	0	7	0	5	0	23	0	10	21	17	0	29	0	0	0
46	64	ahy-miR3516_L+1R-1	TGCTGGGTGATATTGACAGAA	21	arahy.Tifrunner.gnm1.Arahy.02	+	101803271	101803319	TGCTGGGTGATATTGACAGAAgtgttcttctccacttctgagtggcccc	1	ahy-MIR3516,	ahy-MIR3516	tGCTGGGTGATATTGACAGAAGtgttcttcctccacttctgaagtgtccccgg	ahy-miR3516	GCTGGGTGATATTGACAGAAG	5'	Diff	gp1a	....((((..((((..((((((((........)))))))))))))))).	44	51	-15.1	0.6	180	130	197	164	119	41	17	52	359	126	85	135	109	170	257	102	179	171	85	61	64	197	133	331	104	95
47	65	ahy-miR3517_R+1	CTGACCACTGTGATCCCGGAAT	22	arahy.Tifrunner.gnm1.Arahy.10	+	113711313	113711387	atctgacccaaggaagtCTGACCACTGTGATCCCGGAATaacctaaggggtaccccctgctcaggctggtcatcg	1	ahy-MIR3517,	ahy-MIR3517	gcgtatctaacccaaggaagtCTGACCACTGTGATCCCGGAAtaacccaaggggtaccccccttccagcgtcaccggtgtcagc	ahy-miR3517	CTGACCACTGTGATCCCGGAA	5'	Diff	gp1a	...(((((......(((((((.((.....(((((((.....))...)))))......)).))))))))))))...	69	56	-20.8	0.5	4	0	7.5	3	3	0	0	0	0	0	0	0	0	0	5	3	2.5	0	0	0	0	2.5	3	4	0	0
48	66	ahy-MIR3517-p5_1	CAAGGAAGTCTGACCACTGTGA	22	arahy.Tifrunner.gnm1.Arahy.06	+	91985416	91985550	CAAGGAAGTCTGACCACTGTGAtcccggaaaaacccatggggtaccctcctgctgaggctggtcatgggcgggtacaccaacgaaataatctccaagaggccccgacccaagtccagcatgaccagggtcagcca	1	ahy-MIR3517,	ahy-MIR3517	gcgtatctaacccaaggaagtCTGACCACTGTGATCCCGGAAtaacccaaggggtaccccccttccagcgtcaccggtgtcagc	ahy-MIR3517-p5	caaggaagtCTGACCACTGTGA	5'	New	gp1a	...((....((((((.(((..(((((((......))..)))))....((.(((((.((((((((..((((.((....))...........(((...))))))).))))..))))))))).)).))))))))))).	131	57.8	-46.4	0.6	0	0	4	3	0	0	0	0	2.5	0	0	3	0	0	4	2.5	0	2.5	0	0	3	0	2.5	5.5	0	0
49	67	ahy-miR3517_L+1	TCTGACCACTGTGATCCCGGAA	22	arahy.Tifrunner.gnm1.Arahy.03	+	127363101	127363239	caaggaagTCTGACCACTGTGATCCCGGAAtaacccaaggggtacccccctgctcaggctggtcatcggctggtacaccaacgaagtaatgtccaagaggtcctgatccaagtccagcgtcaccggtgtcagccccgtc	1	ahy-MIR3517,	ahy-MIR3517	gcgtatctaacccaaggaagtCTGACCACTGTGATCCCGGAAtaacccaaggggtaccccccttccagcgtcaccggtgtcagc	ahy-miR3517	CTGACCACTGTGATCCCGGAA	5'	Diff	gp1a	...((..(.((((.(((((((((...(((........(((((....)))))..(((((((((.(((((..(((....))).))).....)).))....)).)))))......)))...))))).))))))))).))...	133	58.3	-40.1	0.5	0	0	0	3	0	0	0	0	0	0	0	0	0	0	0	0	0	2.5	0	0	3	0	2.5	0	0	0
50	68	ahy-miR3517_L+1R-1	TCTGACCACTGTGATCCCGGA	21	arahy.Tifrunner.gnm1.Arahy.05	+	40028699	40028792	catgatggcagtgatctcctctaggaagcgtggactcccgaagtccgcatcaagcgtatctgacccaaggaagTCTGACCACTGTGATCCCGGA	1	ahy-MIR3517,	ahy-MIR3517	gcgtatctaacccaaggaagtCTGACCACTGTGATCCCGGAAtaacccaaggggtaccccccttccagcgtcaccggtgtcagc	ahy-miR3517	CTGACCACTGTGATCCCGGAA	3'	Diff	gp1a	...(((..(((((...(((....)))...(((((((.....))))))).(((..(...(((......)))..)..))).)))))..))).....	86	55.3	-25.5	0.5	4	0	2.5	3	3	0	0	0	4	0	0	0	0	0	3	0	3.5	0	0	0	0	0	0	3.5	0	0
51	69	ahy-MIR3517-p5_2	CTGTGATCCCGGAATAACCCA	21	arahy.Tifrunner.gnm1.Arahy.12	+	20687526	20687548	CTGTGATCCCGGAATAACCCATG	1	ahy-MIR3517,	ahy-MIR3517	gcgtatctaacccaaggaagtCTGACCACTGTGATCCCGGAAtaacccaaggggtaccccccttccagcgtcaccggtgtcagc	ahy-MIR3517-p5	CTGTGATCCCGGAAtaaccca	5'	New	gp1a	..........((......))...	10	52.2	-1.1	0.1	0	0	4	3	0	0	0	0	2.5	0	0	3	0	0	4	2.5	0	2.5	0	0	3	0	2.5	5.5	0	0
51	70	ahy-MIR3517-p3_1ss21AT	TGTGATCCCGGAATAACCCATG	22	arahy.Tifrunner.gnm1.Arahy.12	+	20687526	20687548	CTGTGATCCCGGAATAACCCATG	1	ahy-MIR3517,	ahy-MIR3517	gcgtatctaacccaaggaagtCTGACCACTGTGATCCCGGAAtaacccaaggggtaccccccttccagcgtcaccggtgtcagc	ahy-MIR3517-p3	TGTGATCCCGGAAtaacccaag	3'	New	gp1a	..........((......))...	10	52.2	-1.1	0.1	0	4	0	0	0	0	0	0	0	0	0	0	0	0	0	0	0	0	0	0	0	0	2.5	3	0	0
52	71	ahy-miR3517	CTGACCACTGTGATCCCGGAA	21					gcgtatctaacccaaggaagtCTGACCACTGTGATCCCGGAAtaacccaaggggtaccccccttccagcgtcaccggtgtcagc	1	ahy-MIR3517,	ahy-MIR3517	gcgtatctaacccaaggaagtCTGACCACTGTGATCCCGGAAtaacccaaggggtaccccccttccagcgtcaccggtgtcagc	ahy-miR3517	CTGACCACTGTGATCCCGGAA	5'	Yes	gp1a	.....................((((.(((((((((...(((........(((((....))))))))...))))).)))))))).	62	58.3	-22.3	0.5	0	0	0	0	0	0	0	0	0	0	0	0	0	0	0	0	0	0	0	0	0	0	0	0	0	6
53	72	ahy-miR3517_R+1	CTGACCACTGTGATCCCGGAAT	22	arahy.Tifrunner.gnm1.Arahy.01	+	76901943	76902079	taaggaagtCTGACCACTGTGATCCCGGAATaacccatggggtaccctcttgctgaggctggtcatgggcgggtacaccaacgaagtaatctccaagaggccccgacccaagtccagcgtgaccagggtcagccacg	1	ahy-MIR3517,	ahy-MIR3517	gcgtatctaacccaaggaagtCTGACCACTGTGATCCCGGAAtaacccaaggggtaccccccttccagcgtcaccggtgtcagc	ahy-miR3517	CTGACCACTGTGATCCCGGAA	5'	Diff	gp1a	...((....((((((.(((..(((((((......))..)))))........((((.((((((((..((((.((....))...........(((...))))))).))))..)))))))).....)))))))))))...	131	58.4	-44.9	0.6	4	0	7.5	3	3	0	0	0	0	0	0	0	0	0	5	3	2.5	0	0	0	0	2.5	3	4	0	0
54	73	ahy-MIR3517-p5_1ss22AT	CTGTGATCCCGGAATAACCCAT	22	arahy.Tifrunner.gnm1.Arahy.19	+	140514422	140514508	tctgactaCTGTGATCCCGGAATAACCCATgggggtaccctcctgctgaggctggtcataggcgggtacaccaacgaagtaatctcc	1	ahy-MIR3517,	ahy-MIR3517	gcgtatctaacccaaggaagtCTGACCACTGTGATCCCGGAAtaacccaaggggtaccccccttccagcgtcaccggtgtcagc	ahy-MIR3517-p5	CTGTGATCCCGGAAtaacccaa	5'	New	gp1a	...((.((((........((......)).(((..((((((.((((.(((......))))))).)))))).)))....)))).))...	81	55.2	-25.5	0.5	3.5	0	0	2.5	0	0	0	0	0	2.5	8.5	0	0	0	0	0	6	0	0	0	0	0	0	4.5	3	0
55	74	ahy-MIR3517-p3_1ss22AT	CTGTGATCCCGGAATAACCCAT	22	arahy.Tifrunner.gnm1.Arahy.20	+	116138225	116138350	tctgggccgacatgtcctcctgcatgatggtggtaatctcctctaaaaactgctgacccccgaagtccgcatcaagcgtatctgaggcaaggaagtctgaccaCTGTGATCCCGGAATAACCCATg	1	ahy-MIR3517,	ahy-MIR3517	gcgtatctaacccaaggaagtCTGACCACTGTGATCCCGGAAtaacccaaggggtaccccccttccagcgtcaccggtgtcagc	ahy-MIR3517-p3	CTGTGATCCCGGAAtaacccaa	3'	New	gp1a	((((((....(((((......)))))(..(((((...(((((........(((.(((.......))).)))....((.........)).))).))....)))))..)...))))))..........	116	53.2	-29.6	0.4	3.5	0	0	2.5	0	0	0	0	0	2.5	8.5	0	0	0	0	0	6	0	0	0	0	0	0	4.5	3	0
56	75	ahy-MIR3517-p5_1	CAAGGAAGTCTGACCACTGTGA	22	arahy.Tifrunner.gnm1.Arahy.19	+	36563998	36564144	tgaggCAAGGAAGTCTGACCACTGTGAtcccagaataacccatggggtaccctcctgctgaggctggtcatgggcgggtacaccaacgaagtaatctccaagaagccccgacccgagtccagcgtccccagggtcagccctgtcacc	1	ahy-MIR3517,	ahy-MIR3517	gcgtatctaacccaaggaagtCTGACCACTGTGATCCCGGAAtaacccaaggggtaccccccttccagcgtcaccggtgtcagc	ahy-MIR3517-p5	caaggaagtCTGACCACTGTGA	5'	New	gp1a	...((((.((....((((((.(((..((((((..........))))))........((((.((((((((..((((.((....))..........((.....)).)))).))))..)))))))).....))))))))))).))))...	141	59.9	-49.9	0.6	0	0	4	3	0	0	0	0	2.5	0	0	3	0	0	4	2.5	0	2.5	0	0	3	0	2.5	5.5	0	0
57	76	ahy-miR3517_L+1R-1	TCTGACCACTGTGATCCCGGA	21	arahy.Tifrunner.gnm1.Arahy.10	+	12360177	12360309	tgaggtctggccacctctgcagggagtcacgtccccctgcatgatggcagtaagctcctctaggaagtgtggactcccgaagtccgcatcaagtgtatctgccccaaggaagTCTGACCACTGTGATCCCGGA	1	ahy-MIR3517,	ahy-MIR3517	gcgtatctaacccaaggaagtCTGACCACTGTGATCCCGGAAtaacccaaggggtaccccccttccagcgtcaccggtgtcagc	ahy-miR3517	CTGACCACTGTGATCCCGGAA	3'	Diff	gp1a	...((((.(((..(((.(((((((..........)))))))....(((((...(((((....))..(((((((((.....)))))))))..)))....)))))...)))..))).)))).(((......))).	116	57.9	-47.1	0.6	4	0	2.5	3	3	0	0	0	4	0	0	0	0	0	3	0	3.5	0	0	0	0	0	0	3.5	0	0
58	77	ahy-MIR3517-p5_1ss21AT	TGTGATCCCGGAATAACCCATG	22	arahy.Tifrunner.gnm1.Arahy.18	+	8733877	8733987	tgccacTGTGATCCCGGAATAACCCATGgagtcccgtcctgctgaggctcgtcatcggcgggtatacaaacaaagtaatgtccaacaggtccggacccaagtccagtgtca	1	ahy-MIR3517,	ahy-MIR3517	gcgtatctaacccaaggaagtCTGACCACTGTGATCCCGGAAtaacccaaggggtaccccccttccagcgtcaccggtgtcagc	ahy-MIR3517-p5	TGTGATCCCGGAAtaacccaag	5'	New	gp1a	.(.(((((.(((...((......)).(((.((((...((((.((..((((((.....)))))).(((.......))).....)).))))...))))))).)))))))).).	109	55	-33.5	0.5	0	4	0	0	0	0	0	0	0	0	0	0	0	0	0	0	0	0	0	0	0	0	2.5	3	0	0
59	78	ahy-MIR3518-p5	CGAGTATCACCAAATGTCACT	21	arahy.Tifrunner.gnm1.Arahy.09	+	1787941	1788083	gtaaCGAGTATCACCAAATGTCACTcttttagatttgtcttattagttaaggagttgcaacttatgaagtaaatcaaaataatatgatgacgagcatagtggaaggataaattaaaagagTGACCTTTGGGGATATTCGTGgc	1	ahy-MIR3518,	ahy-MIR3518	gctaagcgacaataatttgagagataatatgtaacgagtatcaccaaatgtcactcttttagatttgtcttattagttaaggagttgcaacttatgaagtaaaggataaattaaaagagTGACCTTTGGGGATATTCGTGgctcattacttctcaaatta	ahy-MIR3518-p5	cgagtatcaccaaatgtcact	5'	New	gp1a	...(((((((((.(((((.(((((((((((.((((((((((.(((.((...((((....))))...)).)))..........((((........)))).....))))))))))))))))))))).))))).)))))))))...	137	34.3	-46.5	0.9	12	13	0	11	0	0	0	0	8	0	0	0	0	0	0	0	0	0	8	12	10	0	19	0	0	0
59	79	ahy-miR3518	TGACCTTTGGGGATATTCGTG	21	arahy.Tifrunner.gnm1.Arahy.09	+	1787941	1788083	gtaaCGAGTATCACCAAATGTCACTcttttagatttgtcttattagttaaggagttgcaacttatgaagtaaatcaaaataatatgatgacgagcatagtggaaggataaattaaaagagTGACCTTTGGGGATATTCGTGgc	1	ahy-MIR3518,	ahy-MIR3518	gctaagcgacaataatttgagagataatatgtaacgagtatcaccaaatgtcactcttttagatttgtcttattagttaaggagttgcaacttatgaagtaaaggataaattaaaagagTGACCTTTGGGGATATTCGTGgctcattacttctcaaatta	ahy-miR3518	TGACCTTTGGGGATATTCGTG	3'	Yes	gp1a	...(((((((((.(((((.(((((((((((.((((((((((.(((.((...((((....))))...)).)))..........((((........)))).....))))))))))))))))))))).))))).)))))))))...	137	34.3	-46.5	0.9	21	14	15	23	0	0	0	10	17	0	5	0	8	6	8	0	21	0	10	11	21	0	24	11	0	12
60	80	ahy-miR3520-3p_R+3	AAGGGAGACGTTTGAATTATCTTA	24	arahy.Tifrunner.gnm1.Arahy.18	+	48142417	48142484	AAGGGAGACGTTTGAATTATCTTAtcttatcttatttggctaagataagagagacgtttgaattcgaa	1	ahy-MIR3520,	ahy-MIR3520	gacctgggtcctctatttatAGGTGATGGTGAATATCTTATCttatcttatttggttaagatAAGGGAGACGTTTGAATTATCctatggagacatttnaattcgaaagttggtta	ahy-miR3520-3p	AAGGGAGACGTTTGAATTATC	5'	Diff	gp1a	......((.(((..(((..((((.((((((((((......)))))))))))))).)))..)))))...	59	32.4	-16.4	0.7	0	2.5	0	0	0	0	0	0	3	0	0	0	2.5	0	3	0	0	0	0	0	0	0	0	0	0	0
61	81	ahy-miR3520-3p_R+3	AAGGGAGACGTTTGAATTATCTTA	24	arahy.Tifrunner.gnm1.Arahy.06	+	89739409	89739529	AAGGGAGACGTTTGAATTATCTTAtcttatcttatttggctaagataagggagacgtttagctcagttggttaggagctctagtgggctggttccgaaccttctggaaggatgaagcgggt	1	ahy-MIR3520,	ahy-MIR3520	gacctgggtcctctatttatAGGTGATGGTGAATATCTTATCttatcttatttggttaagatAAGGGAGACGTTTGAATTATCctatggagacatttnaattcgaaagttggtta	ahy-miR3520-3p	AAGGGAGACGTTTGAATTATC	5'	Diff	gp1a	........((((....(((((((.((((((((((......))))))))))............((((..((((.((((((..((....)))))))).))))..)))).)))))))))))...	110	44.6	-32.1	0.6	0	2.5	0	0	0	0	0	0	3	0	0	0	2.5	0	3	0	0	0	0	0	0	0	0	0	0	0
62	82	ahy-miR3520-3p_L+2R+1	ATAAGGGAGACGTTTGAATTATCT	24	arahy.Tifrunner.gnm1.Arahy.15	+	13279536	13279617	ATAAGGGAGACGTTTGAATTATCTtatcttatcttatcttatttggctaagataagagagacgtttggattcgaaagttggt	1	ahy-MIR3520,	ahy-MIR3520	gacctgggtcctctatttatAGGTGATGGTGAATATCTTATCttatcttatttggttaagatAAGGGAGACGTTTGAATTATCctatggagacatttnaattcgaaagttggtta	ahy-miR3520-3p	AAGGGAGACGTTTGAATTATC	5'	Diff	gp1a	........(((.((((((((......((((.((((((((((......))))))))))))))......)))))))).)))...	71	32.9	-20.9	0.8	0	2.5	6	3	4	0	0	0	2.5	3	0	3	0	0	8	0	6	0	0	0	0	2.5	2.5	3.5	0	0
62	83	ahy-miR3520-3p_L+2R+1	ATAAGGGAGACGTTTGAATTATCT	24	arahy.Tifrunner.gnm1.Arahy.15	+	13284752	13284833	ATAAGGGAGACGTTTGAATTATCTtatcttatcttatcttatttggctaagataagagagacgtttggattcgaaagttggt	1	ahy-MIR3520,	ahy-MIR3520	gacctgggtcctctatttatAGGTGATGGTGAATATCTTATCttatcttatttggttaagatAAGGGAGACGTTTGAATTATCctatggagacatttnaattcgaaagttggtta	ahy-miR3520-3p	AAGGGAGACGTTTGAATTATC	5'	Diff	gp1a	........(((.((((((((......((((.((((((((((......))))))))))))))......)))))))).)))...	71	32.9	-20.9	0.8	0	2.5	6	3	4	0	0	0	2.5	3	0	3	0	0	8	0	6	0	0	0	0	2.5	2.5	3.5	0	0
1	1	mtr-miR156b-5p	TGACAGAAGAGAGTGAGCAC	20	arahy.Tifrunner.gnm1.Arahy.16	-	149879597	149879695	aagggtggTGACAGAAGAGAGTGAGCACacatggtattttcttgtatgatgttgtttcatacttgaagctatatgtgctcactctcttgctgtcacccc	7	mtr-MIR156c,gma-MIR156v,gma-MIR156y,mdm-MIR156o,stu-MIR156j,stu-MIR156h,cpa-MIR156c,	mtr-MIR156c	ggtggTGACAGAAGAGAGTGAGCACacatggtgttttcttgcacgattatgtttcctgcttgaagctatatgTGCTTACTCTCTATCTGTCACCccac	mtr-miR156b-5p	TGACAGAAGAGAGTGAGCAC	5'	Yes	gp1b	...((.(((((((((((((((((((((((.(((((...(((..((((((.......))))))..)))))))).))))))))))))))).))))))))))	96	43.4	-57.2	1.3	2256.2	1551.5	953.7	2266.6	1110.5	524.8	454.2	752.2	3024.4	1211	1207.2	1432.6	843.3	2436.8	3410.6	1547.6	3325.4	1510.1	1201.1	1127.7	1918.9	1556	3144.6	3282.8	1080.2	1130.1
2	2	gma-miR156a	TGACAGAAGAGAGTGAGCAC	20	arahy.Tifrunner.gnm1.Arahy.01	-	97695432	97695522	agagacTGACAGAAGAGAGTGAGCACacgctctcaggtgattgtatgagggcatgcaattgcgggtgcgTGCTCACTTCTCTATCTGTCAG	2	gma-MIR156u,cpa-MIR156b,	gma-MIR156u	gagagaggcTGACAGAAGAGAGTGAGCACatactagtggagattgtatgagggcatacaattgcgggtgcgtgctcacttctctatctgtcagcttccca	gma-miR156a	TGACAGAAGAGAGTGAGCAC	5'	Yes	gp1b	.....(((((((((((((((((((((.(((((....(..((((((((....))))))))..)))))).))))))))).)))).))))))))	86	51.6	-51.5	1.1	2256.2	1551.5	953.7	2266.6	1110.5	524.8	454.2	752.2	3024.4	1211	1207.2	1432.6	843.3	2436.8	3410.6	1547.6	3325.4	1510.1	1201.1	1127.7	1918.9	1556	3144.6	3282.8	1080.2	1130.1
2	3	gma-MIR156u-p3	TGCTCACTTCTCTATCTGTCAG	22	arahy.Tifrunner.gnm1.Arahy.01	-	97695432	97695522	agagacTGACAGAAGAGAGTGAGCACacgctctcaggtgattgtatgagggcatgcaattgcgggtgcgTGCTCACTTCTCTATCTGTCAG	2	gma-MIR156u,cpa-MIR156b,	gma-MIR156u	gagagaggcTGACAGAAGAGAGTGAGCACatactagtggagattgtatgagggcatacaattgcgggtgcgtgctcacttctctatctgtcagcttccca	gma-MIR156u-p3	tgctcacttctctatctgtcag	3'	New	gp1b	.....(((((((((((((((((((((.(((((....(..((((((((....))))))))..)))))).))))))))).)))).))))))))	86	51.6	-51.5	1.1	47	16	25	29	25	14	0	16	45	23	18	12	28	16	26	0	49	19	13	12	19	30	33	30	13	8
3	4	mtr-miR156b-5p	TGACAGAAGAGAGTGAGCAC	20	arahy.Tifrunner.gnm1.Arahy.08	-	16773913	16774006	ggaggTGACAGAAGAGAGTGAGCACacatagtattttcttgtatggtgtttaatactcgaaactatgtgtGCTCACTCTCTACCTGTCACCcca	2	mtr-MIR156b,fve-MIR156d,	mtr-MIR156b	ggaggTGACAGAAGAGAGTGAGCACacatggtactttcgtgtatgatgtttcattctcgaagctatgtgTGCTCACTCTCTATCTGTCACCccat	mtr-miR156b-5p	TGACAGAAGAGAGTGAGCAC	5'	Yes	gp1b	((.((((((((.((((((((((((((((((((...(((..((((........))))..)))))))))))))))))))))))..)))))))))).	93	43.6	-57.6	1.4	2256.2	1551.5	953.7	2266.6	1110.5	524.8	454.2	752.2	3024.4	1211	1207.2	1432.6	843.3	2436.8	3410.6	1547.6	3325.4	1510.1	1201.1	1127.7	1918.9	1556	3144.6	3282.8	1080.2	1130.1
3	5	mtr-miR156b-3p_L-1_1ss14TC	GCTCACTCTCTACCTGTCACC	21	arahy.Tifrunner.gnm1.Arahy.08	-	16773913	16774006	ggaggTGACAGAAGAGAGTGAGCACacatagtattttcttgtatggtgtttaatactcgaaactatgtgtGCTCACTCTCTACCTGTCACCcca	2	mtr-MIR156b,fve-MIR156d,	mtr-MIR156b	ggaggTGACAGAAGAGAGTGAGCACacatggtactttcgtgtatgatgtttcattctcgaagctatgtgTGCTCACTCTCTATCTGTCACCccat	mtr-miR156b-3p	TGCTCACTCTCTATCTGTCACC	3'	Diff	gp1b	((.((((((((.((((((((((((((((((((...(((..((((........))))..)))))))))))))))))))))))..)))))))))).	93	43.6	-57.6	1.4	33.5	29.5	22	23.5	22.5	16	0	15.5	40.5	22.5	17	16.5	13.5	29.5	50	22	43.5	30	10	16	19	46	50	102.5	15.5	18
4	6	ptc-miR156a	TGACAGAAGAGAGTGAGCAC	20	arahy.Tifrunner.gnm1.Arahy.17	-	133213449	133213547	gtaagggaggTGACAGAAGAGAGTGAGCACacatggtattttcttgtatagtatttaatactcgaaactatgtgtGCTCACTCTCTACCTGTCACCcca	7	ptc-MIR156b,stu-MIR156g,stu-MIR156k,stu-MIR156i,mes-MIR156c,mes-MIR156g,rco-MIR156c,	ptc-MIR156b	gtaagggaggTGACAGAAGAGAGTGAGCACacagggtactttcttgcatgacatccatgcttgaaactttgcgtgctcactctctatctgtcaccccacca	ptc-miR156a	TGACAGAAGAGAGTGAGCAC	5'	Yes	gp1b	.....((.((((((((.((((((((((((((((((((...(((..((((........))))..)))))))))))))))))))))))..)))))))))).	93	42.4	-56.4	1.3	2256.2	1551.5	953.7	2266.6	1110.5	524.8	454.2	752.2	3024.4	1211	1207.2	1432.6	843.3	2436.8	3410.6	1547.6	3325.4	1510.1	1201.1	1127.7	1918.9	1556	3144.6	3282.8	1080.2	1130.1
4	7	stu-miR156g-3p_2ss4TC13TC	GCTCACTCTCTACCTGTCACC	21	arahy.Tifrunner.gnm1.Arahy.17	-	133213449	133213547	gtaagggaggTGACAGAAGAGAGTGAGCACacatggtattttcttgtatagtatttaatactcgaaactatgtgtGCTCACTCTCTACCTGTCACCcca	7	ptc-MIR156b,stu-MIR156g,stu-MIR156k,stu-MIR156i,mes-MIR156c,mes-MIR156g,rco-MIR156c,	stu-MIR156g	TGACAGAAGAGAGTGAGCACacatggtgttttcttgcatgatgtttatatgcttgaaactatgtgtGCTTACTCTCTATCTGTCACC	stu-miR156g-3p	GCTTACTCTCTATCTGTCACC	3'	Diff	gp1b	.....((.((((((((.((((((((((((((((((((...(((..((((........))))..)))))))))))))))))))))))..)))))))))).	93	42.4	-56.4	1.3	33.5	29.5	22	23.5	22.5	16	0	15.5	40.5	22.5	17	16.5	13.5	29.5	50	22	43.5	30	10	16	19	46	50	102.5	15.5	18
5	8	gma-miR156a	TGACAGAAGAGAGTGAGCAC	20	arahy.Tifrunner.gnm1.Arahy.10	+	94596582	94596677	tagaaatTGACAGAAGAGAGTGAGCACacagaagcactcgttataattctataccgttgctcttgcgtGCTCACTTCTCCTTCTGTCAGCTtccag	11	gma-MIR156h,gma-MIR156k,gma-MIR156n,gma-MIR156o,vun-MIR156a,ptc-MIR156c,ptc-MIR156e,mes-MIR156e,mes-MIR156f,cme-MIR156j,rco-MIR156b,	gma-MIR156o	aaatTGACAGAAGAGAGTGAGCACaaagaggcacttgatataaatctatatcactgcttttgtgtgctcactactctttctgtcggtttt	gma-miR156a	TGACAGAAGAGAGTGAGCAC	5'	Yes	gp1b	..(((..((((((((((((((((((((.((..((((..((.((((....)))).)).))))..)).)))))))).))).)))))))))..)))...	91	44.8	-44.3	1	2256.2	1551.5	953.7	2266.6	1110.5	524.8	454.2	752.2	3024.4	1211	1207.2	1432.6	843.3	2436.8	3410.6	1547.6	3325.4	1510.1	1201.1	1127.7	1918.9	1556	3144.6	3282.8	1080.2	1130.1
5	9	ptc-MIR156c-p3_1ss12AC	GCTCACTTCTCCTTCTGTCAGCT	23	arahy.Tifrunner.gnm1.Arahy.10	+	94596582	94596677	tagaaatTGACAGAAGAGAGTGAGCACacagaagcactcgttataattctataccgttgctcttgcgtGCTCACTTCTCCTTCTGTCAGCTtccag	11	gma-MIR156h,gma-MIR156k,gma-MIR156n,gma-MIR156o,vun-MIR156a,ptc-MIR156c,ptc-MIR156e,mes-MIR156e,mes-MIR156f,cme-MIR156j,rco-MIR156b,	ptc-MIR156c	cattagaaacTGACAGAAGAGAGTGAGCACacagaggcatatttgtataaatctataccattgcttttgcgtgctcacttctcattctgtcagcttccag	ptc-MIR156c-p3	gctcacttctcattctgtcagct	3'	New	gp1b	..(((..((((((((((((((((((((.((..((((..((.((((....)))).)).))))..)).)))))))).))).)))))))))..)))...	91	44.8	-44.3	1	230	188	195	160	73	85	42	116	409	204	216	168	118	253	243	95	563	97	165	127	160	273	169	315	118	115
6	10	mtr-miR160a	TGCCTGGCTCCCTGTATGCCA	21	arahy.Tifrunner.gnm1.Arahy.19	-	146931078	146931196	catgcatacatgtgtgtatgTGCCTGGCTCCCTGTATGCCAtttgtagagctcatcgaaatatctatgacctctgtagatgGCGTATGAGGAGCCAAGCATAttccatatacatacatg	4	mtr-MIR160b,mtr-MIR160e,gma-MIR160a,gma-MIR160b,	mtr-MIR160b	gtatgTGCCTGGCTCCCTGTATGCCAtatatgaagctcattgaaaaatcaatgacctttgtggatggcgtatgaggagccaagcatattcc	mtr-miR160a	TGCCTGGCTCCCTGTATGCCA	5'	Yes	gp1b	........(((((((((((((((.(((((((..(((((((((((..((((.((((.((....)).)))).))))..)))))))))))..))))))).)))).......)))))))))))	111	43.7	-58.2	1.1	1601.92	1238	1572.58	1518.75	1099.58	216.667	169.667	312.583	3037.33	739.583	498.833	926.417	779.417	1199.08	1589.58	787.417	2019	1028.25	633.333	513.083	604.5	1939.58	1401.08	1690.5	973.167	831.083
6	11	gma-miR160a-3p	GCGTATGAGGAGCCAAGCATA	21	arahy.Tifrunner.gnm1.Arahy.19	-	146931078	146931196	catgcatacatgtgtgtatgTGCCTGGCTCCCTGTATGCCAtttgtagagctcatcgaaatatctatgacctctgtagatgGCGTATGAGGAGCCAAGCATAttccatatacatacatg	4	mtr-MIR160b,mtr-MIR160e,gma-MIR160a,gma-MIR160b,	gma-MIR160b	atgtgtatgTGCCTGGCTCCCTGTATGCCAtttgcatagttcattgagcatcaatgatctttgtgaatgGCGTATGAGGAGCCAAGCATA	gma-miR160a-3p	GCGTATGAGGAGCCAAGCATA	3'	Yes	gp1b	........(((((((((((((((.(((((((..(((((((((((..((((.((((.((....)).)))).))))..)))))))))))..))))))).)))).......)))))))))))	111	43.7	-58.2	1.1	647	396	724	871	424.5	117.5	92	150.5	1192	568.5	256.5	409.5	318	452	809	403	618.5	506	221.5	196	317	505	631.5	594	421	311.5
7	12	mdm-miR160a	TGCCTGGCTCCCTGTATGCCA	21	arahy.Tifrunner.gnm1.Arahy.09	+	118663215	118663306	gtgtgtatgTGCCTGGCTCCCTGTATGCCAtttgtagagctcatcgaaatatcgataacctctgtagatgGCGTATGAGGAGCCAAGCATAt	9	mdm-MIR160e,mdm-MIR160c,stu-MIR160a,mes-MIR160h,mes-MIR160d,cme-MIR160a,fve-MIR160b,cpa-MIR160c,cpa-MIR160f,	mdm-MIR160c	tatgTGCCTGGCTCCCTGTATGCCAtttgcagagtcccaccgaacagcgatggcctctgtggatggcgtatgaggagccaagcatata	mdm-miR160a	TGCCTGGCTCCCTGTATGCCA	5'	Yes	gp1b	......((((((.(((((((..(((((((((((..((((...(((((....)))))...))))..)))))))))))..))))))).))))))	86	46.7	-48.3	1.1	1601.92	1238	1572.58	1518.75	1099.58	216.667	169.667	312.583	3037.33	739.583	498.833	926.417	779.417	1199.08	1589.58	787.417	2019	1028.25	633.333	513.083	604.5	1939.58	1401.08	1690.5	973.167	831.083
7	13	stu-miR160a-3p	GCGTATGAGGAGCCAAGCATA	21	arahy.Tifrunner.gnm1.Arahy.09	+	118663215	118663306	gtgtgtatgTGCCTGGCTCCCTGTATGCCAtttgtagagctcatcgaaatatcgataacctctgtagatgGCGTATGAGGAGCCAAGCATAt	9	mdm-MIR160e,mdm-MIR160c,stu-MIR160a,mes-MIR160h,mes-MIR160d,cme-MIR160a,fve-MIR160b,cpa-MIR160c,cpa-MIR160f,	stu-MIR160a	TGCCTGGCTCCCTGTATGCCAtttgcaaagctcaccgtaatatatcgatgggccttgttgaatgGCGTATGAGGAGCCAAGCATA	stu-miR160a-3p	GCGTATGAGGAGCCAAGCATA	3'	Yes	gp1b	......((((((.(((((((..(((((((((((..((((...(((((....)))))...))))..)))))))))))..))))))).))))))	86	46.7	-48.3	1.1	647	396	724	871	424.5	117.5	92	150.5	1192	568.5	256.5	409.5	318	452	809	403	618.5	506	221.5	196	317	505	631.5	594	421	311.5
8	14	gma-miR160a-5p	TGCCTGGCTCCCTGTATGCCA	21	arahy.Tifrunner.gnm1.Arahy.16	-	40916328	40916418	tacttggtgTGCCTGGCTCCCTGTATGCCAtttgtagagctcgtcaaaacattgacagcctTAACAAATGGCGTGCGAGGAGccatgcatg	2	gma-MIR160e,gma-MIR160c,	gma-MIR160c	TGCCTGGCTCCCTGTATGCCAtttgcagagcccatcaggacagtgatggccttaacgaatggcgtgcgaggagccatgcatgttgtgcgtt	gma-miR160a-5p	TGCCTGGCTCCCTGTATGCCA	5'	Yes	gp1b	........((((.(((((((..(((((((((((((((.(((.(((((....))))))))))..)))))))))))))..))))))).)))).	82	50.5	-48.9	1.1	1601.92	1238	1572.58	1518.75	1099.58	216.667	169.667	312.583	3037.33	739.583	498.833	926.417	779.417	1199.08	1589.58	787.417	2019	1028.25	633.333	513.083	604.5	1939.58	1401.08	1690.5	973.167	831.083
8	15	gma-MIR160e-p3_1ss5GA	TAACAAATGGCGTGCGAGGAG	21	arahy.Tifrunner.gnm1.Arahy.16	-	40916328	40916418	tacttggtgTGCCTGGCTCCCTGTATGCCAtttgtagagctcgtcaaaacattgacagcctTAACAAATGGCGTGCGAGGAGccatgcatg	2	gma-MIR160e,gma-MIR160c,	gma-MIR160e	tacttggcgTGCCTGGCTCCCTGTATGCCAtttgcagagcccatcaggacagtgatggccttaacgaatggcgtgcgaggagccatgcat	gma-MIR160e-p3	taacgaatggcgtgcgaggag	3'	New	gp1b	........((((.(((((((..(((((((((((((((.(((.(((((....))))))))))..)))))))))))))..))))))).)))).	82	50.5	-48.9	1.1	529	250	487	503	295	60	28	129	876	232	238	336	233	273	605	233	487	328	195	146	130	364	419	591	332	233
9	16	gma-miR160a-5p	TGCCTGGCTCCCTGTATGCCA	21	arahy.Tifrunner.gnm1.Arahy.06	+	29721957	29722042	TGCCTGGCTCCCTGTATGCCAtttgtagagctcgtcaaaacgttgacagccttaacaaatggcgtgcgaggagccatgcatgctgt	1	gma-MIR160d,	gma-MIR160d	TGCCTGGCTCCCTGTATGCCAtttgtagaccccattacaaaggtgatggccttagcaaatggcgtatgaggagtcatgcatgctgtgtttt	gma-miR160a-5p	TGCCTGGCTCCCTGTATGCCA	5'	Yes	gp1b	(((.(((((((..(((((((((((((((.(((.(((((....))))))))))..)))))))))))))..))))))).)))......	80	52.3	-47.3	1.1	1601.92	1238	1572.58	1518.75	1099.58	216.667	169.667	312.583	3037.33	739.583	498.833	926.417	779.417	1199.08	1589.58	787.417	2019	1028.25	633.333	513.083	604.5	1939.58	1401.08	1690.5	973.167	831.083
10	17	gma-MIR162c-p5	GGAGGCAGCGGTTCATCGATC	21	arahy.Tifrunner.gnm1.Arahy.01	+	108768476	108768591	aggtgaagtcactGGAGGCAGCGGTTCATCGATCtcttcctgaatttggctgtggaatcatacacaaagcaagaatcggTCGATAAACCTCTGCATCCAGcgctcactttgcctct	8	gma-MIR162c,gma-MIR162b,vun-MIR162,aau-MIR162,mdm-MIR162a,mdm-MIR162b,mes-MIR162,rco-MIR162,	gma-MIR162c	gagatgaggtgaagtcactggaggcagcggttcatcgatctcttcctgaatttggttgtggaagaacacaaagcaagaatcggTCGATAAACCTCTGCATCCAgcgctcactttgcctc	gma-MIR162c-p5	ggaggcagcggttcatcgatc	5'	New	gp1b	(((..((((..(((((.((((.((((.(((((((..(((.((..((((..((((....))))..)))).)).)))..))))))).)))).)))).))))).....))))..)))..	114	49.1	-45.2	0.8	264	194	262	448	208	27	21	52	862	171	93	139	86	249	337	120	325	157	73	59	92	317	268	281	135	82
10	18	gma-miR162a_R+1	TCGATAAACCTCTGCATCCAG	21	arahy.Tifrunner.gnm1.Arahy.01	+	108768476	108768591	aggtgaagtcactGGAGGCAGCGGTTCATCGATCtcttcctgaatttggctgtggaatcatacacaaagcaagaatcggTCGATAAACCTCTGCATCCAGcgctcactttgcctct	8	gma-MIR162c,gma-MIR162b,vun-MIR162,aau-MIR162,mdm-MIR162a,mdm-MIR162b,mes-MIR162,rco-MIR162,	gma-MIR162b	tgaggtgaagtcactggaggcagcggttcatcgatctcttcctgaatttggttgtggaagaacacaaagcaagaatcggTCGATAAACCTCTGCATCCAgcgctcacttt	gma-miR162a	TCGATAAACCTCTGCATCCA	3'	Diff	gp1b	(((..((((..(((((.((((.((((.(((((((..(((.((..((((..((((....))))..)))).)).)))..))))))).)))).)))).))))).....))))..)))..	114	49.1	-45.2	0.8	2382	2265	2621	3718	2441	601	473	822	5170	1882	1569	1494	1491	2309	3256	1387	3360	1653	1131	1019	1264	2707	2179	4858	1343	1319
11	19	mdm-miR167b	TGAAGCTGCCAGCATGATCTA	21	arahy.Tifrunner.gnm1.Arahy.06	+	16775152	16775259	tcgtgcaccaataacagtTGAAGCTGCCAGCATGATCTAaattttccttgtgttaagtcaaggaaagatcggatcatgtgacagcttcacctgtatatgggatcacga	2	mdm-MIR167d,mdm-MIR167c,	mdm-MIR167c	tagcagtTGAAGCTGCCAGCATGATCTAaacttccctcttggtcaaggaaagatcagatcatgtggtagcttcacctgttg	mdm-miR167b	TGAAGCTGCCAGCATGATCTA	5'	Yes	gp1b	(((((..(((...((((.((((((((...(((((((((...(((((((((........)))))))))...)))))))))..)))))))).))))...)))...)))))	108	42.6	-49.4	1.1	388	275	367	478	289	73	71	151	613	230	243	248	199	293	344	230	406	240	169	139	185	344	403	503	170	226
12	20	gma-miR168a	TCGCTTGGTGCAGGTCGGGAA	21	arahy.Tifrunner.gnm1.Arahy.05	-	2723858	2723982	cactgcgcggtctctaatTCGCTTGGTGCAGGTCGGGAAccgatcttcccgcgcgtaatggatgccgttggcggcggcgaatttggatCCCGCCTTGCATCAACTGAATcggaggccacggtgaa	3	gma-MIR168a,gma-MIR168b,vun-MIR168,	gma-MIR168b	cggtctctaatTCGCTTGGTGCAGGTCGGGAAccggttttcgcgcggaatggaggaacggtcgccggcggcgaattggatcccgccttgcatcaactgaatcggaggccg	gma-miR168a	TCGCTTGGTGCAGGTCGGGAA	5'	Yes	gp1b	(((((...((((((..((((..((((((((((.(((((.((((..(((((((.((((((((...))))).))))))).))).)))).))))).))))))))))..))))..)))))).)))))..	123	60	-65.7	0.9	30032	20951	25159	29732	18205	3889	2785	5375	46131	17087	9821	15581	14602	22797	34917	18412	27112	18885	9481	7169	10386	27803	25880	30601	15030	14089
12	21	gma-MIR168a-p3	CCCGCCTTGCATCAACTGAAT	21	arahy.Tifrunner.gnm1.Arahy.05	-	2723858	2723982	cactgcgcggtctctaatTCGCTTGGTGCAGGTCGGGAAccgatcttcccgcgcgtaatggatgccgttggcggcggcgaatttggatCCCGCCTTGCATCAACTGAATcggaggccacggtgaa	3	gma-MIR168a,gma-MIR168b,vun-MIR168,	gma-MIR168a	cactgtgcggtctctaatTCGCTTGGTGCAGGTCGGGAAccggttttcgcgcggaatggaggagcggtcgccggcgccgaattggatcccgccttgcatcaactgaatcggaggccgcggtgaac	gma-MIR168a-p3	cccgccttgcatcaactgaat	3'	New	gp1b	(((((...((((((..((((..((((((((((.(((((.((((..(((((((.((((((((...))))).))))))).))).)))).))))).))))))))))..))))..)))))).)))))..	123	60	-65.7	0.9	3809	3079	2711	1987	1467	492	292	621	7172	2166	1211	1966	1800	3136	4152	2343	3494	2569	1129	973	1203	4692	3390	4814	2285	2104
13	22	mtr-miR171e-5p	CGATGTTGGTGAGGTTCAATC	21	arahy.Tifrunner.gnm1.Arahy.01	-	98830791	98830885	gaaagCGATGTTGGTGAGGTTCAATCcgaagacggatttacatggtataatccagtaaaatacgatctcagaTTGAGCCGCGCCAATATCACTtt	7	mtr-MIR171e,gma-MIR171k,gma-MIR171l,ptc-MIR171c,ptc-MIR171d,mes-MIR171f,ssl-MIR171b,	mtr-MIR171e	aaagCGATGTTGGTGAGGTTCAATCcgaagacggatttacatgtatagagttgtaaaatacgatctcAGATTGAGCCGCGCCAATATCacttt	mtr-miR171e-5p	CGATGTTGGTGAGGTTCAATC	5'	Yes	gp1b	.((((.((((((((((.(((((((((.((.((((..(((((.(((......))))))))...)).)))).))))))))).)))))))))).))))	94	42.1	-42.4	1.1	242.5	151.5	197.5	397.5	201.5	66	69.5	101	377	116.5	179.5	238	134	206	285	105	473.5	103.5	162	147	154	270	356	246	149	137.5
13	23	gma-miR171k-3p	TTGAGCCGCGCCAATATCACT	21	arahy.Tifrunner.gnm1.Arahy.01	-	98830791	98830885	gaaagCGATGTTGGTGAGGTTCAATCcgaagacggatttacatggtataatccagtaaaatacgatctcagaTTGAGCCGCGCCAATATCACTtt	7	mtr-MIR171e,gma-MIR171k,gma-MIR171l,ptc-MIR171c,ptc-MIR171d,mes-MIR171f,ssl-MIR171b,	gma-MIR171k	gagaaagCGATGTTGGTGAGGTTCAATCcgaagacggatttacatgtagaagcagtaaaatacgatctcagaTTGAGCCGCGCCAATATCACTttatc	gma-miR171k-3p	TTGAGCCGCGCCAATATCACT	3'	Yes	gp1b	.((((.((((((((((.(((((((((.((.((((..(((((.(((......))))))))...)).)))).))))))))).)))))))))).))))	94	42.1	-42.4	1.1	145.5	136	235	270.5	175	9	10	20.5	438.5	124	60.5	55.5	63	163.5	252	83	79	116.75	17.5	19	23.5	126.5	67.25	91	31.5	49
14	24	lja-miR171d-3p	CGATGTTGGTGAGGTTCAATC	21	arahy.Tifrunner.gnm1.Arahy.11	+	145417062	145417158	gaaagCGATGTTGGTGAGGTTCAATCcgaagacggatttacatggtataatccagtaaaatacgatctcagaTTGAGCCGCGCCAATATCACTtttc	1	lja-MIR171d,	lja-MIR171d	gagaaagCGATGTTGGTGAGGTTCAATCtgaagacggatttacatgaagaagcagtaaaatacgatctcagaTTGAGCCGCGCCAATATCACTtttctt	lja-miR171d-3p	CGATGTTGGTGAGGTTCAATC	5'	Yes	gp1b	(((((.((((((((((.(((((((((.((.((((..(((((.(((......))))))))...)).)))).))))))))).)))))))))).))))).	96	42.3	-43.4	1.1	242.5	151.5	197.5	397.5	201.5	66	69.5	101	377	116.5	179.5	238	134	206	285	105	473.5	103.5	162	147	154	270	356	246	149	137.5
14	25	lja-miR171d-5p	TTGAGCCGCGCCAATATCACT	21	arahy.Tifrunner.gnm1.Arahy.11	+	145417062	145417158	gaaagCGATGTTGGTGAGGTTCAATCcgaagacggatttacatggtataatccagtaaaatacgatctcagaTTGAGCCGCGCCAATATCACTtttc	1	lja-MIR171d,	lja-MIR171d	gagaaagCGATGTTGGTGAGGTTCAATCtgaagacggatttacatgaagaagcagtaaaatacgatctcagaTTGAGCCGCGCCAATATCACTtttctt	lja-miR171d-5p	TTGAGCCGCGCCAATATCACT	3'	Yes	gp1b	(((((.((((((((((.(((((((((.((.((((..(((((.(((......))))))))...)).)))).))))))))).)))))))))).))))).	96	42.3	-43.4	1.1	145.5	136	235	270.5	175	9	10	20.5	438.5	124	60.5	55.5	63	163.5	252	83	79	116.75	17.5	19	23.5	126.5	67.25	91	31.5	49
15	26	gma-miR171c-3p	TTGAGCCGTGCCAATATCACA	21	arahy.Tifrunner.gnm1.Arahy.14	-	6158622	6158708	gatattggtacggttcaatcagaaggcagtgctttgatagattctaaagtcctcttatttgaTTGAGCCGTGCCAATATCACAtgtt	2	mtr-MIR171f,gma-MIR171f,	gma-MIR171f	gAGATATTGGTACGGTTCAATCagaaggcagtgctttatgatttcaaagctctcttatttgaTTGAGCCGTGCCAATATCACAtgcaaac	gma-miR171c-3p	TTGAGCCGTGCCAATATCACA	3'	Yes	gp1b	((((((((((((((((((((((((((.((..((((((.....)).))))..))))).))))))))))))))))))))))).......	80	39.1	-43.8	1.3	34	35.5	57	44	41.5	6.5	3.5	11.5	85	28	15.5	14	21	25.5	46.5	18.5	38	27.75	10.5	7.5	9	36	37.75	30	11	11.5
16	27	mdm-miR171f-3p	TTGAGCCGTGCCAATATCACG	21	arahy.Tifrunner.gnm1.Arahy.03	+	13718124	13718220	gtttaacgggatattggtccggttcaataaaaaagcagtgctccaaaatagttaggggcttgttttttgaTTGAGCCGTGCCAATATCACGtgccac	2	mdm-MIR171f,rco-MIR171a,	mdm-MIR171f	cagtttgaacgGGATATTGGTCCGGTTCAATAagaaaacagtgctctaaaagtgcttgagctctgctttttgaTTGAGCCGTGCCAATATCACGtgccactg	mdm-miR171f-3p	TTGAGCCGTGCCAATATCACG	3'	Yes	gp1b	.....(((.((((((((..(((((((((.(((((((((.(((((..........)))))))))))))).)))))))))..)))))))).))).....	87	43.3	-45.5	1.1	0	0	2.5	0	0	0	0	0	3	0	0	0	0	0	0	0	0	0	0	0	0	0	0	3	0	0
17	28	gma-miR171c-3p	TTGAGCCGTGCCAATATCACA	21	arahy.Tifrunner.gnm1.Arahy.01	-	103574826	103574923	ttaataacttgggatattggtacggttcaatcaaaaggcggcactttgtaatacaaaagctccgtgttatttgaTTGAGCCGTGCCAATATCACAtgt	1	gma-MIR171c,	gma-MIR171c	ttaagaacttgAGATATTGGTGCGGTTCAATCagaaggcagtgttttatgatccaaaagctctgtgttatttgaTTGAGCCGTGCCAATATCACAtgttattga	gma-miR171c-3p	TTGAGCCGTGCCAATATCACA	3'	Yes	gp1b	......((.((.(((((((((((((((((((((((..((((..((((........))))..))))....))))))))))))))))))))))).)).))	92	38.8	-44.6	1.2	34	35.5	57	44	41.5	6.5	3.5	11.5	85	28	15.5	14	21	25.5	46.5	18.5	38	27.75	10.5	7.5	9	36	37.75	30	11	11.5
18	29	mes-MIR319b-p5_1ss8GA	ATGGGTGACAATAAGATTTAAT	22	arahy.Tifrunner.gnm1.Arahy.15	-	16645774	16645951	agagagctttcttcagtccactcATGGGTGACAATAAGATTTAATtagctgccgactcattcatccaaatgctgagtgaagagatagatagagagatacactcagtaaatgagtgaatgatgcgggagacaaattgaatcttatgtttcctatacTTGGACTGAAGGGAGCTCCCTtt	2	ptc-MIR319a,mes-MIR319b,	mes-MIR319b	agagagctttcttcagtccactcatgggtggcaataagatttaattagctgccgactcattcatccaaatactgagttaaagggctagctgaggaggttacccagtaaatgagtgaatgaagcgggagacaaattgaatcttaagcttcctgtacTTGGACTGAAGGGAGCTCCCT	mes-MIR319b-p5	atgggtggcaataagatttaat	5'	New	gp1b	((.(((((..((((((((((...(((((..((.(((((((((((((..((.(((..(((((((..((..(((((((((....................)))))))))..))..)))))))..))).))...)))))))))))))))..)))))...))))))))))..))))).))..	176	40.4	-80.8	1.1	124	66	191	189	164	46	19	46	240	107	43	47	148	140	173	76	134.5	209	51	53	175	105	179	136	53	110
18	30	ptc-miR319a_R+1	TTGGACTGAAGGGAGCTCCCT	21	arahy.Tifrunner.gnm1.Arahy.15	-	16645774	16645951	agagagctttcttcagtccactcATGGGTGACAATAAGATTTAATtagctgccgactcattcatccaaatgctgagtgaagagatagatagagagatacactcagtaaatgagtgaatgatgcgggagacaaattgaatcttatgtttcctatacTTGGACTGAAGGGAGCTCCCTtt	2	ptc-MIR319a,mes-MIR319b,	ptc-MIR319a	taatagctaagagagctttcttcagtccactcatgggtggtagtaggatttaattagctgccgactcattcatccaaatactgagttaaaggacaaggagattacccagtaaatgagtgaatgatgcgggagacaaattgaatcctaagcttcctgtacTTGGACTGAAGGGAGCTCCCtttcctttt	ptc-miR319a	TTGGACTGAAGGGAGCTCCC	3'	Diff	gp1b	((.(((((..((((((((((...(((((..((.(((((((((((((..((.(((..(((((((..((..(((((((((....................)))))))))..))..)))))))..))).))...)))))))))))))))..)))))...))))))))))..))))).))..	176	40.4	-80.8	1.1	5774.83	2999	5577	5070.17	3780.5	1233	1072	1030.83	9782.17	2506.33	1108.67	2904.83	3146.83	4789.33	6971.67	3442.5	5739.33	5108	2688.67	1915.83	3514	7434.67	4585.33	6985.67	4177.33	3080.83
19	31	gma-MIR319j-p5	TTAATTAGCTGCCGACTCATT	21	arahy.Tifrunner.gnm1.Arahy.05	+	41236964	41237142	agagagctttcttcagtccactcatgggtgacaataagatTTAATTAGCTGCCGACTCATTcatccaaatgctgagtgaagatatagatagagagatacactcagtaaatgagtgaatgatgcgggagacaaattgaatcttatgtttcctatacTTGGACTGAAGGGAGCTCCCTttt	2	mtr-MIR319b,gma-MIR319j,	gma-MIR319j	aggtaagagagctctcttcagcccactcataggtgataataggatttaattagctgccgactcattcatacacatgctgagtgaattaatgaataatactcagtaaatgagtgaatgatacgggagacaaattgaatcttatgttttctgtacTTGGACTGAAGGGAGCTCCCttttct	gma-MIR319j-p5	ttaattagctgccgactcatt	5'	New	gp1b	((.(((((..((((((((((...(((((..((.(((((((((((((..((.(((..(((((((..((..(((((((((....................)))))))))..))..)))))))..))).))...)))))))))))))))..)))))...))))))))))..))))).))...	176	39.7	-80.8	1.1	0	0	0	0	0	0	0	0	0	0	0	0	0	0	0	0	2.5	0	0	0	0	0	0	0	0	0
19	32	mtr-miR319a-3p_R+1_2	TTGGACTGAAGGGAGCTCCCT	21	arahy.Tifrunner.gnm1.Arahy.05	+	41236964	41237142	agagagctttcttcagtccactcatgggtgacaataagatTTAATTAGCTGCCGACTCATTcatccaaatgctgagtgaagatatagatagagagatacactcagtaaatgagtgaatgatgcgggagacaaattgaatcttatgtttcctatacTTGGACTGAAGGGAGCTCCCTttt	2	mtr-MIR319b,gma-MIR319j,	mtr-MIR319b	taagaGAGCTTTCTTTAGTCCACTCAtgggtgacaataagatttcaattagctgctgactcattcatccaaatgttgagtaaaatatatagaaacatatactcatcaaatgagtgaatgatgcgggagacaaattgaatcttaagtttcctatacTTGGACTGAAGGGAGCTCCCttttc	mtr-miR319a-3p	TTGGACTGAAGGGAGCTCCC	3'	Diff	gp1b	((.(((((..((((((((((...(((((..((.(((((((((((((..((.(((..(((((((..((..(((((((((....................)))))))))..))..)))))))..))).))...)))))))))))))))..)))))...))))))))))..))))).))...	176	39.7	-80.8	1.1	5774.83	2999	5577	5070.17	3780.5	1233	1072	1030.83	9782.17	2506.33	1108.67	2904.83	3146.83	4789.33	6971.67	3442.5	5739.33	5108	2688.67	1915.83	3514	7434.67	4585.33	6985.67	4177.33	3080.83
20	33	gma-MIR319m-p5_1ss5GC	AGCTCCTGACTCATTCATTCA	21	arahy.Tifrunner.gnm1.Arahy.01	+	8541407	8541585	atagtttaagagagcttccttcagtccactcatggacgaataaagggattcgaattAGCTGCTGACTCATTCATTCAaacgcaatagaacacgtgatatgctattgcgaatgtgtgaatgatgcaggagataatttcatccttttttcgtctttgcTTGGACTGAAGGGAGCTCCCTtt	1	gma-MIR319m,	gma-MIR319m	atagtttaagagagcttccttcagtccactcatggatggatagagggtttgaattagctgctgactcattcattcaaacacaatagaacgggtgtcatggtatgctattgtgaatgcctgaatgatgcaggaggtaaagttcatccttttcttgtctgtgcTTGGACTGAAGGGAGCTCCCttttactgt	gma-MIR319m-p5	agctgctgactcattcattca	5'	New	gp1b	.......(((.(((((((((((((((((..((..((((((.((((((((..((((((.((.(((..(((((((..((..((((((((.............))))))))..))..)))))))..))).)).)))))).))))))))))))))..))..))))))))))))))))).))).	171	40.8	-82.8	1.1	0	0	0	0	0	0	0	0	0	0	0	0	0	0	0	0	0	0	0	0	0	0	0	10	0	0
20	34	gma-miR319a_R+1	TTGGACTGAAGGGAGCTCCCT	21	arahy.Tifrunner.gnm1.Arahy.01	+	8541407	8541585	atagtttaagagagcttccttcagtccactcatggacgaataaagggattcgaattAGCTGCTGACTCATTCATTCAaacgcaatagaacacgtgatatgctattgcgaatgtgtgaatgatgcaggagataatttcatccttttttcgtctttgcTTGGACTGAAGGGAGCTCCCTtt	1	gma-MIR319m,	gma-MIR319m	atagtttaagagagcttccttcagtccactcatggatggatagagggtttgaattagctgctgactcattcattcaaacacaatagaacgggtgtcatggtatgctattgtgaatgcctgaatgatgcaggaggtaaagttcatccttttcttgtctgtgcTTGGACTGAAGGGAGCTCCCttttactgt	gma-miR319a	TTGGACTGAAGGGAGCTCCC	3'	Diff	gp1b	.......(((.(((((((((((((((((..((..((((((.((((((((..((((((.((.(((..(((((((..((..((((((((.............))))))))..))..)))))))..))).)).)))))).))))))))))))))..))..))))))))))))))))).))).	171	40.8	-82.8	1.1	5774.83	2999	5577	5070.17	3780.5	1233	1072	1030.83	9782.17	2506.33	1108.67	2904.83	3146.83	4789.33	6971.67	3442.5	5739.33	5108	2688.67	1915.83	3514	7434.67	4585.33	6985.67	4177.33	3080.83
21	35	lja-miR396	TTCCACAGCTTTCTTGAACTG	21	arahy.Tifrunner.gnm1.Arahy.01	+	98773975	98774089	cctctttgtattcTTCCACAGCTTTCTTGAACTGcatctaattgttgcatgcatgccatggcactcttcttcttgcgttgcgGTTCAATAAAGCTGTGGGAAGatacagataggg	1	lja-MIR396,	lja-MIR396	gtcctctttgtattcTTCCACAGCTTTCTTGAACTGcattcaattgcatgcatgccatgacactcttattttgcggttcaataaagctgtgggaagatatagataggg	lja-miR396	TTCCACAGCTTTCTTGAACTG	5'	Yes	gp1b	(((.(((((((..((((((((((((.((((((((((............((((((((....)))..........))))))))))))))).))))))))))))..))))))).))).	114	44.3	-50.6	1	6565	6103	6632	10902	7203	1568	1595	3227	13345	5426	4970	4109	3707	5723	8360	3427	8879	4468	2823	3043	3465	6279	8021	9917	2794	3374
21	36	lja-MIR396-p3	GTTCAATAAAGCTGTGGGAAG	21	arahy.Tifrunner.gnm1.Arahy.01	+	98773975	98774089	cctctttgtattcTTCCACAGCTTTCTTGAACTGcatctaattgttgcatgcatgccatggcactcttcttcttgcgttgcgGTTCAATAAAGCTGTGGGAAGatacagataggg	1	lja-MIR396,	lja-MIR396	gtcctctttgtattcTTCCACAGCTTTCTTGAACTGcattcaattgcatgcatgccatgacactcttattttgcggttcaataaagctgtgggaagatatagataggg	lja-MIR396-p3	gttcaataaagctgtgggaag	3'	New	gp1b	(((.(((((((..((((((((((((.((((((((((............((((((((....)))..........))))))))))))))).))))))))))))..))))))).))).	114	44.3	-50.6	1	4344	3231	3827	7816	4226	735	581	1125	8820	3796	2283	2430	1937	4114	7985	2625	7519	2721	1711	1869	2321	4991	3901	5870	2610	1939
22	37	peu-MIR2916-p5_1ss5AG	TACCGTCCTAGTCTCAACCATA	22	arahy.Tifrunner.gnm1.Arahy.07	-	28939339	28939428	tgggggctcgaagacgatcagaTACCATCCTAGTCTCAACCATAaaCGATGCCGACCAGGGATCAGCGGAtgttgcttttaggactccgc	1	peu-MIR2916,	peu-MIR2916	TGGGGACTCGAAGACGATCATATaccatcctagtctcaaccataaacgatgccgaccagggattggcggatgttgcttctaggagtccgcca	peu-MIR2916-p5	Taccatcctagtctcaaccata	5'	New	gp1b	.((((..(((....)))..........((((((...((((.......(((.((.....)).))).......))))...))))))))))..	57	53.3	-20.1	0.4	2785	3015	1786	5736	2519	4584	8176	9709	5594	1727	4151	5520	2898	2750	5401	2554	4182	3301	15926	9758	15707	3566	2230	10100	5072	2675
22	38	peu-MIR2916-p3_2ss18TC19GA	CGATGCCGACCAGGGATCAGCGGA	24	arahy.Tifrunner.gnm1.Arahy.07	-	28939339	28939428	tgggggctcgaagacgatcagaTACCATCCTAGTCTCAACCATAaaCGATGCCGACCAGGGATCAGCGGAtgttgcttttaggactccgc	1	peu-MIR2916,	peu-MIR2916	TGGGGACTCGAAGACGATCATATaccatcctagtctcaaccataaacgatgccgaccagggattggcggatgttgcttctaggagtccgcca	peu-MIR2916-p3	cgatgccgaccagggattggcgga	3'	New	gp1b	.((((..(((....)))..........((((((...((((.......(((.((.....)).))).......))))...))))))))))..	57	53.3	-20.1	0.4	3097	3798	3716	6210	3284	4915	8827	10365	5984	3066	6139	3867	3745	3146	6379	2769	4176	2753	7096	6909	8732	4929	1717	8695	3646	2426
23	39	gma-MIR5368-p5_1ss6TC	CTGTTCCCTGGGATTGGCT	19	arahy.Tifrunner.gnm1.Arahy.17	+	25486451	25486619	aCTGTTTCCTGGGATTGGCTttgggcttttcctgcgcagcttaggtggagggcgaagaaggcctccttccggggggcccgagccatcaGTGAGATACCACTCTGGAAGAGCTagaattctaaccttgtgccaggacctacgggccaagggacagtctcaggtagacagt	1	gma-MIR5368,	gma-MIR5368	actgtttcctgggattggctttgggctttcctgcacagcttaggtggagggcaaagaagacttccttctgagggggccagagccatcagagagataccactctggacgagctagaattctaaccttgtgccaggacctatgggccgagGGACAGTCTCAGGTAGACAgt	gma-MIR5368-p5	ctgtttcctgggattggct	5'	New	gp1b	(((((((((((((((((.((((((.((..(((((.(((.(..(((((((((((......(((((((.....)))))))....(((..((((......)))).)))....)))....)))).)))).))))))))).....)).))))))..)))))))))).)))))))	169	56.8	-72.6	0.8	0	0	0	9	0	0	35	0	0	0	0	0	0	0	0	0	0	0	0	0	0	0	0	0	0	0
23	40	gma-MIR5368-p3_2ss2AT19CA	GTGAGATACCACTCTGGAAGAGCT	24	arahy.Tifrunner.gnm1.Arahy.17	+	25486451	25486619	aCTGTTTCCTGGGATTGGCTttgggcttttcctgcgcagcttaggtggagggcgaagaaggcctccttccggggggcccgagccatcaGTGAGATACCACTCTGGAAGAGCTagaattctaaccttgtgccaggacctacgggccaagggacagtctcaggtagacagt	1	gma-MIR5368,	gma-MIR5368	actgtttcctgggattggctttgggctttcctgcacagcttaggtggagggcaaagaagacttccttctgagggggccagagccatcagagagataccactctggacgagctagaattctaaccttgtgccaggacctatgggccgagGGACAGTCTCAGGTAGACAgt	gma-MIR5368-p3	gagagataccactctggacgagct	3'	New	gp1b	(((((((((((((((((.((((((.((..(((((.(((.(..(((((((((((......(((((((.....)))))))....(((..((((......)))).)))....)))....)))).)))).))))))))).....)).))))))..)))))))))).)))))))	169	56.8	-72.6	0.8	32	49	97	214	73	76	202	194	108	45	71	53	77	37	48	20	147	26	136	95	161	100	15	92	34	32
24	41	stu-MIR8005c-p3_1ss12AG	TAGGGTTTAGGGTTTAGGGTT	21	arahy.Tifrunner.gnm1.scaffold_57	+	65627	65822	ggttTAGGGTTTAGGGTTTAGGGTTtagggtttagggtttagggttagggtttagggtttagggtttaggtttaggtttagggtttagggtttagggtttagggtttagggtttagggtttagggtttagggtttaggtttagggtttagggtttagggtttagggtttaggtttagggtttagggtttagggttt	1	stu-MIR8005c,	stu-MIR8005c	ggtttagtgtttagaatttaggattaagggtttagggtttagggttagggttcaatgtttggagtttaggatataggatttagggtttaggatttagggtttagggattagagtttaggatttagagtttagggtttagagtttgcgtttaggttttagggtttaggcttttgtTTTAGAGTTTAAGGTTTAGAGTTT	stu-MIR8005c-p3	tagggtttaggatttagggtt	3'	New	gp1b	.......................................................................................................................................................................(((..(.....)..)))............	1	41.8	1.7	0	0	0	0	0	0	0	0	0	2.5	0	0	0	0	0	0	0	0	0	0	0	0	0	0	0	0	0
25	42	stu-MIR8005a-p3_1ss12AG	TAGGGTTTAGGGTTTAGGGTT	21	arahy.Tifrunner.gnm1.Arahy.04	-	3325	3451	tttagggtttagggttttagggtttaggggttTAGGGTTTAGGGTTTAGGGTTtagggtttaggttagggtttagggtttaggggtttagggtttagggtttagggtttagggtttagggtttaggg	1	stu-MIR8005a,	stu-MIR8005a	TTTAGAGTTTAAGGTTTAGAGTTTaaggtttggggtttagggtttagggttaagagtatcatggttagggtttagggtttaggggttaggatatagggtttaggatttagggtttagagtttagggt	stu-MIR8005a-p3	tagggtttaggatttagggtt	3'	New	gp1b	.(((..(.......)..)))...........................................................................................................	1	43.3	-0.4	0	0	0	0	0	0	0	0	0	2.5	0	0	0	0	0	0	0	0	0	0	0	0	0	0	0	0	0
1	1	mtr-miR156j_R+1_1ss12GA	TGACAGAAGAGAGTGAGCACT	21	arahy.Tifrunner.gnm1.Arahy.01	-	97695311	97695498	cactgagatatgtggagtagaggagtgtggagctacagagatggataaaaagagacTGACAGAAGAGAGTGAGCACAcgctctcaggtgattgtatgagggcatgcaattgcgggtgcgtGCTCACTTCTCTATCTGTCAGTtacttgttctcttagcttccttctcttcctccctttctctgtgtct	27	mtr-MIR156j,gma-MIR156u,gma-MIR156a,gma-MIR156q,gma-MIR156s,ptc-MIR156a,ptc-MIR156f,ath-MIR156g,aly-MIR156g,mes-MIR156a,mes-MIR156d,vvi-MIR156d,vvi-MIR156e,nta-MIR156c,nta-MIR156b,lus-MIR156a,lus-MIR156g,cme-MIR156j,cme-MIR156d,fve-MIR156h,bra-MIR156e,bna-MIR156e,cas-MIR156a,cas-MIR156g,cpa-MIR156d,rco-MIR156d,han-MIR156a,	mtr-MIR156j	acatagaaatTGACAGAAGAGGGTGAGCACaaaaaaagtctttagtatataatgtttataccattatttttgtgtgctcatactcttctgacaattttcaatg	mtr-miR156j	TGACAGAAGAGGGTGAGCAC	5'	Diff	gp2a	(((.((((.....((((.(((((((...(((((((.(((((........(((..((((((((((((((((((((((.(((((....(..((((((((....))))))))..)))))).)))))))).))))).)))))))))..)))..)))))))))))))))))))..))))...)))).)))...	185	47.3	-90.3	1	80.5	47	60	129.5	71.5	14.5	12	33	149	44	79.5	56.5	55	66.5	158.5	39.5	114	66.5	49.5	54.5	73	67.5	92.5	145.5	64	52.5
1	2	bra-miR156e-3p_L-1_2ss8CT14TA	GCTCACTTCTCTATCTGTCAGT	22	arahy.Tifrunner.gnm1.Arahy.01	-	97695311	97695498	cactgagatatgtggagtagaggagtgtggagctacagagatggataaaaagagacTGACAGAAGAGAGTGAGCACAcgctctcaggtgattgtatgagggcatgcaattgcgggtgcgtGCTCACTTCTCTATCTGTCAGTtacttgttctcttagcttccttctcttcctccctttctctgtgtct	27	mtr-MIR156j,gma-MIR156u,gma-MIR156a,gma-MIR156q,gma-MIR156s,ptc-MIR156a,ptc-MIR156f,ath-MIR156g,aly-MIR156g,mes-MIR156a,mes-MIR156d,vvi-MIR156d,vvi-MIR156e,nta-MIR156c,nta-MIR156b,lus-MIR156a,lus-MIR156g,cme-MIR156j,cme-MIR156d,fve-MIR156h,bra-MIR156e,bna-MIR156e,cas-MIR156a,cas-MIR156g,cpa-MIR156d,rco-MIR156d,han-MIR156a,	bra-MIR156e	gaaatgcaacagagaaaacTGACAGAAGAGAGTGAGCACttgcaaggcactgttatgtgtcaataactttgcgtgtgcgTGCTCACCTCTCTTTCTGTCAGTtgcctgacttctcgctt	bra-miR156e-3p	TGCTCACCTCTCTTTCTGTCAGT	3'	Diff	gp2a	(((.((((.....((((.(((((((...(((((((.(((((........(((..((((((((((((((((((((((.(((((....(..((((((((....))))))))..)))))).)))))))).))))).)))))))))..)))..)))))))))))))))))))..))))...)))).)))...	185	47.3	-90.3	1	507.5	276	378	305	201	131.5	94	174.5	531	285.5	330.5	202	237	246	346.5	145.5	586.5	254.5	185.5	212.5	247.5	393	462.5	389.5	191.5	202
2	3	mdm-miR156ad	TGACAGAAGAAAGTGAGCAC	20	arahy.Tifrunner.gnm1.Arahy.06	-	111177841	111177946	taaagggtggTGACAGAAGAAAGTGAGCACacatggtgttttcttgtatgatgatgtttcatacttgaagctatatgtGCTCACTCTCTTGCTGTCACCccttaac	19	gma-MIR156q,gma-MIR156s,mdm-MIR156ad,mdm-MIR156ae,stu-MIR156f,aly-MIR156d,mes-MIR156c,mes-MIR156d,nta-MIR156b,nta-MIR156e,lus-MIR156g,cme-MIR156d,fve-MIR156h,bra-MIR156e,bna-MIR156e,cas-MIR156a,cas-MIR156d,cpa-MIR156d,cca-MIR156b,	mdm-MIR156ae	ggtttgkaaagaaggTGACAGAAGAAAGTGAGCACacgtggttcttttcttgcatgaatccatgtcagaagctctatgtgttcattctctatctgtcacctaccatccttaacc	mdm-miR156ad	TGACAGAAGAAAGTGAGCAC	5'	Yes	gp2a	...((((.((((((((((((.((((((((((.(((((...(((..((((((.......))))))..)))))))).)))))))))).)))).))))))))))))...	100	41.5	-54.2	1.2	1771	1640	1000	2792	2226	435.5	343.5	524	2242	1253	630	702	585.5	1132	1556	742.5	1976	982	527.5	405	739	1650	1066	2540.5	661.5	603
2	4	mes-MIR156c-p3_1ss12AT	GCTCACTCTCTTGCTGTCACC	21	arahy.Tifrunner.gnm1.Arahy.06	-	111177841	111177946	taaagggtggTGACAGAAGAAAGTGAGCACacatggtgttttcttgtatgatgatgtttcatacttgaagctatatgtGCTCACTCTCTTGCTGTCACCccttaac	19	gma-MIR156q,gma-MIR156s,mdm-MIR156ad,mdm-MIR156ae,stu-MIR156f,aly-MIR156d,mes-MIR156c,mes-MIR156d,nta-MIR156b,nta-MIR156e,lus-MIR156g,cme-MIR156d,fve-MIR156h,bra-MIR156e,bna-MIR156e,cas-MIR156a,cas-MIR156d,cpa-MIR156d,cca-MIR156b,	mes-MIR156c	ggTGACAGAAGAGAGTGAGCACacatggtattttcttgcatgaattcatgctcgaagctctgcgtgctcactctctagctgtcacc	mes-MIR156c-p3	gctcactctctagctgtcacc	3'	New	gp2a	...((((.((((((((((((.((((((((((.(((((...(((..((((((.......))))))..)))))))).)))))))))).)))).))))))))))))...	100	41.5	-54.2	1.2	267.5	141.5	185.5	295	300	41.5	30.5	50	301	128.5	78	91	118	54.5	109.5	72	158.5	104	52	37.5	56	203	140	255	94	73.5
3	5	mdm-miR156ad_R+1	TGACAGAAGAAAGTGAGCACA	21	arahy.Tifrunner.gnm1.Arahy.16	-	149879652	149879766	aacggtaaagggtggTGACAGAAGAGAGTGAGCACAcatggtattttcttgtatgatgttgtttcatacttgaagctatatgtGCTCACTCTCTTGCTGTCACCccgtaaccatt	14	ath-MIR156g,mdm-MIR156ad,mdm-MIR156ae,aly-MIR156g,aly-MIR156d,mes-MIR156a,mes-MIR156c,nta-MIR156b,nta-MIR156e,cme-MIR156d,fve-MIR156h,cas-MIR156g,cas-MIR156d,cpa-MIR156d,	mdm-MIR156ae	ggtttgkaaagaaggTGACAGAAGAAAGTGAGCACacgtggttcttttcttgcatgaatccatgtcagaagctctatgtgttcattctctatctgtcacctaccatccttaacc	mdm-miR156ad	TGACAGAAGAAAGTGAGCAC	5'	Diff	gp2a	...(((....((.(((((((((((((((((((((((.(((((...(((..((((((.......))))))..)))))))).))))))))))))))).))))))))))...)))...	109	42.6	-61	1.2	365.5	148	252.5	639	497	50	42	132	397.5	138.5	154.5	147.5	133.5	121.5	303.5	142.5	304	207	106	110	169.5	136.5	251.5	426	163.5	122.5
3	4	mes-MIR156c-p3_1ss12AT	GCTCACTCTCTTGCTGTCACC	21	arahy.Tifrunner.gnm1.Arahy.16	-	149879652	149879766	aacggtaaagggtggTGACAGAAGAGAGTGAGCACAcatggtattttcttgtatgatgttgtttcatacttgaagctatatgtGCTCACTCTCTTGCTGTCACCccgtaaccatt	14	ath-MIR156g,mdm-MIR156ad,mdm-MIR156ae,aly-MIR156g,aly-MIR156d,mes-MIR156a,mes-MIR156c,nta-MIR156b,nta-MIR156e,cme-MIR156d,fve-MIR156h,cas-MIR156g,cas-MIR156d,cpa-MIR156d,	mes-MIR156c	ggTGACAGAAGAGAGTGAGCACacatggtattttcttgcatgaattcatgctcgaagctctgcgtgctcactctctagctgtcacc	mes-MIR156c-p3	gctcactctctagctgtcacc	3'	New	gp2a	...(((....((.(((((((((((((((((((((((.(((((...(((..((((((.......))))))..)))))))).))))))))))))))).))))))))))...)))...	109	42.6	-61	1.2	267.5	141.5	185.5	295	300	41.5	30.5	50	301	128.5	78	91	118	54.5	109.5	72	158.5	104	52	37.5	56	203	140	255	94	73.5
4	3	mdm-miR156ad	TGACAGAAGAAAGTGAGCAC	20	arahy.Tifrunner.gnm1.Arahy.17	-	133213503	133213617	aaagggtaagggaggTGACAGAAGAGAGTGAGCACacatggtattttcttgtatagtatttaatactcgaAACTATGTGTGCTCACTCTCTACCtgtcaccccaaactatctctc	16	mtr-MIR156j,gma-MIR156q,gma-MIR156s,mdm-MIR156ae,mdm-MIR156ad,mes-MIR156d,vvi-MIR156e,nta-MIR156b,lus-MIR156g,cme-MIR156d,fve-MIR156h,bra-MIR156e,bna-MIR156e,cas-MIR156a,cpa-MIR156d,cca-MIR156a,	mdm-MIR156ad	ggtttggaaagaaggTGACAGAAGAAAGTGAGCACacgtggttcttttcttgcatgaatccatgtcagaagctctatgtgttcattctctatctgtcacctaccatccttaacc	mdm-miR156ad	TGACAGAAGAAAGTGAGCAC	5'	Yes	gp2a	...(((((..((.((((((((.((((((((((((((((((((...(((..((((........))))..)))))))))))))))))))))))..))))))))))....)))))...	109	41.7	-58.6	1.2	1771	1640	1000	2792	2226	435.5	343.5	524	2242	1253	630	702	585.5	1132	1556	742.5	1976	982	527.5	405	739	1650	1066	2540.5	661.5	603
4	6	cca-MIR156a-p3_1ss23TC	AACTATGTGTGCTCACTCTCTACC	24	arahy.Tifrunner.gnm1.Arahy.17	-	133213503	133213617	aaagggtaagggaggTGACAGAAGAGAGTGAGCACacatggtattttcttgtatagtatttaatactcgaAACTATGTGTGCTCACTCTCTACCtgtcaccccaaactatctctc	16	mtr-MIR156j,gma-MIR156q,gma-MIR156s,mdm-MIR156ae,mdm-MIR156ad,mes-MIR156d,vvi-MIR156e,nta-MIR156b,lus-MIR156g,cme-MIR156d,fve-MIR156h,bra-MIR156e,bna-MIR156e,cas-MIR156a,cpa-MIR156d,cca-MIR156a,	cca-MIR156a	TGACAGAAGAGAGTGAGCACagatgggcttttcttgcatgatattggagggaggtgtactagatgatgatttgtatgcttgaaactatgtgtgctcactctctatccgtcacccacct	cca-MIR156a-p3	aactatgtgtgctcactctctatc	3'	New	gp2a	...(((((..((.((((((((.((((((((((((((((((((...(((..((((........))))..)))))))))))))))))))))))..))))))))))....)))))...	109	41.7	-58.6	1.2	0	0	4	0	0	0	0	0	0	0	0	0	0	0	0	0	0	0	0	0	0	0	0	0	0	0
5	7	nta-miR156a_1ss19AT	TGACAGAAGAGAGTGAGCTC	20	arahy.Tifrunner.gnm1.Arahy.08	-	16773967	16774081	aaagggtaagggaggTGACAGAAGAGAGTGAGCACacatagtattttcttgtatggtgtttaatactcgaAACTATGTGTGCTCACTCTCTACCtgtcaccccaagctatctctc	5	nta-MIR156b,cme-MIR156d,fve-MIR156h,cpa-MIR156d,cca-MIR156a,	nta-MIR156b	ttaaaggaggTGACAGAAGAGAGTGAGCACccatggtgttttcttacatgagatatatattcatgcttgaagctatgcgtgctcactctctatctgtcacccactgttttc	nta-miR156a	TGACAGAAGAGAGTGAGCAC	5'	Diff	gp2a	...(((((..((.((((((((.((((((((((((((((((((...(((..((((........))))..)))))))))))))))))))))))..))))))))))....)))))...	109	43.5	-59.8	1.2	8.5	2.5	0	5.5	3	0	0	0	8.5	0	2.5	4.5	5	5.5	4	4	10.5	9.5	8.5	11	10.5	0	19	6	2.5	6.5
5	6	cca-MIR156a-p3_1ss23TC	AACTATGTGTGCTCACTCTCTACC	24	arahy.Tifrunner.gnm1.Arahy.08	-	16773967	16774081	aaagggtaagggaggTGACAGAAGAGAGTGAGCACacatagtattttcttgtatggtgtttaatactcgaAACTATGTGTGCTCACTCTCTACCtgtcaccccaagctatctctc	5	nta-MIR156b,cme-MIR156d,fve-MIR156h,cpa-MIR156d,cca-MIR156a,	cca-MIR156a	TGACAGAAGAGAGTGAGCACagatgggcttttcttgcatgatattggagggaggtgtactagatgatgatttgtatgcttgaaactatgtgtgctcactctctatccgtcacccacct	cca-MIR156a-p3	aactatgtgtgctcactctctatc	3'	New	gp2a	...(((((..((.((((((((.((((((((((((((((((((...(((..((((........))))..)))))))))))))))))))))))..))))))))))....)))))...	109	43.5	-59.8	1.2	0	0	4	0	0	0	0	0	0	0	0	0	0	0	0	0	0	0	0	0	0	0	0	0	0	0
6	8	ptc-MIR156a-p5	AGACTGACAGAAGAGAGTGAGC	22	arahy.Tifrunner.gnm1.Arahy.11	+	146594184	146594275	AGACTGACAGAAGAGAGTGAGCacacgctctcaggtgattgtatgagggcatgcaattgcgggtgcgtGCTCACTTCTCTATCTGTCAGTta	10	gma-MIR156u,gma-MIR156a,ptc-MIR156a,ptc-MIR156f,vvi-MIR156d,nta-MIR156c,lus-MIR156a,cme-MIR156j,fve-MIR156h,rco-MIR156d,	ptc-MIR156a	aaagaaagacTGACAGAAGAGAGTGAGCACacacgaaagtatatggtatgaaggcattccattgcagggtgtgtgctcacatctcttctgtcagcttccac	ptc-MIR156a-p5	agacTGACAGAAGAGAGTGAGC	5'	New	gp2a	.(((((((((((((((((((((((.(((((....(..((((((((....))))))))..)))))).)))))))).))))).)))))))))).	90	50	-55	1.2	27	16	11.5	54	31.5	5.5	5	9	38.5	16	27.5	6	14	21.5	40.5	6.5	25	16.5	13.5	16.5	14.5	18.5	21.5	45.5	18.5	4.5
6	9	gma-MIR156u-p3_1ss22CT	GCTCACTTCTCTATCTGTCAGT	22	arahy.Tifrunner.gnm1.Arahy.11	+	146594184	146594275	AGACTGACAGAAGAGAGTGAGCacacgctctcaggtgattgtatgagggcatgcaattgcgggtgcgtGCTCACTTCTCTATCTGTCAGTta	10	gma-MIR156u,gma-MIR156a,ptc-MIR156a,ptc-MIR156f,vvi-MIR156d,nta-MIR156c,lus-MIR156a,cme-MIR156j,fve-MIR156h,rco-MIR156d,	gma-MIR156u	gagagaggcTGACAGAAGAGAGTGAGCACatactagtggagattgtatgagggcatacaattgcgggtgcgtgctcacttctctatctgtcagcttccca	gma-MIR156u-p3	gctcacttctctatctgtcagc	3'	New	gp2a	.(((((((((((((((((((((((.(((((....(..((((((((....))))))))..)))))).)))))))).))))).)))))))))).	90	50	-55	1.2	507.5	276	378	305	201	131.5	94	174.5	531	285.5	330.5	202	237	246	346.5	145.5	586.5	254.5	185.5	212.5	247.5	393	462.5	389.5	191.5	202
7	10	mtr-miR156b-5p_L+2	AATGACAGAAGAGAGTGAGCAC	22	arahy.Tifrunner.gnm1.Arahy.16	+	148445241	148445357	taatttggcacatagaaATTGACAGAAGAGAGTGAGCACacagaaaatatattgtataaatttatgcaattttttttgtgTGCTCACTACTCTTTCTGTCAGAttctgtccaaaaat	25	mtr-MIR156i,gma-MIR156o,gma-MIR156h,gma-MIR156k,vun-MIR156a,ath-MIR156a,mdm-MIR156d,mdm-MIR156l,stu-MIR156f,aly-MIR156a,mes-MIR156f,mes-MIR156e,csi-MIR156b,cme-MIR156d,cme-MIR156j,cme-MIR156c,bra-MIR156f,bna-MIR156f,bna-MIR156a,cas-MIR156a,cpa-MIR156a,cpa-MIR156b,rco-MIR156b,han-MIR156b,han-MIR156a,	mtr-MIR156i	gatatTGACAGAAGAGAGTGAGCACatgctgcagtgattgtatgatagcatacaattcttggtgcgTGCTCACTTCTCTTTCTGTCATCttat	mtr-miR156b-5p	TGACAGAAGAGAGTGAGCAC	5'	Diff	gp2a	...(((((...((((((..((((((((((((((((((((((((((((...((((((((....)))))))).))))))))))))))))).))))).))))))..)))))))))))...	111	30.8	-55.1	1.5	5.5	10	0	6	3	0	0	0	3.5	3	4	3.5	0	0	16	3	12	0	9.5	2.5	3.5	0	0	4.5	0	0
7	11	ath-MIR156a-p3_1ss9GA	TGCTCACTACTCTTTCTGTCAGA	23	arahy.Tifrunner.gnm1.Arahy.16	+	148445241	148445357	taatttggcacatagaaATTGACAGAAGAGAGTGAGCACacagaaaatatattgtataaatttatgcaattttttttgtgTGCTCACTACTCTTTCTGTCAGAttctgtccaaaaat	25	mtr-MIR156i,gma-MIR156o,gma-MIR156h,gma-MIR156k,vun-MIR156a,ath-MIR156a,mdm-MIR156d,mdm-MIR156l,stu-MIR156f,aly-MIR156a,mes-MIR156f,mes-MIR156e,csi-MIR156b,cme-MIR156d,cme-MIR156j,cme-MIR156c,bra-MIR156f,bna-MIR156f,bna-MIR156a,cas-MIR156a,cpa-MIR156a,cpa-MIR156b,rco-MIR156b,han-MIR156b,han-MIR156a,	ath-MIR156a	caagagaaacgcaaagaaacTGACAGAAGAGAGTGAGCACacaaaggcaatttgcatatcattgcacttgcttctcttgcgtGCTCACTGCTCTTTCTGTCAGAttccggtgctgatctcttt	ath-MIR156a-p3	tGCTCACTGCTCTTTCTGTCAGA	3'	New	gp2a	...(((((...((((((..((((((((((((((((((((((((((((...((((((((....)))))))).))))))))))))))))).))))).))))))..)))))))))))...	111	30.8	-55.1	1.5	40	5	18	13	9	0	0	5	26	5	5	0	14	7	8	7	6	0	10	5	8	15	6	24	0	9
8	12	ath-miR156h_R+1_1ss5AG	TGACGGAAGAAAGAGAGCACA	21	arahy.Tifrunner.gnm1.Arahy.05	-	37673269	37673423	aataagacacagaattagaatacaagtgagatTGACGGAAGAAAGAGAGCACAtgctgccagacagtcattgttgtgtatctacatgttcttgcagtgcgtgctctctttttttctgtcaatctccaatttatccttcattttttgtgtctttgt	9	gma-MIR156p,gma-MIR156t,ath-MIR156h,aly-MIR156h,ppe-MIR156b,ppe-MIR156a,csi-MIR156g,lus-MIR156d,cas-MIR156h,	ath-MIR156h	atgaaaaatgtTGACAGAAGAAAGAGAGCACaacctgggattagcaaaaagatagttttgcccttgtcgggagtgtgctctctttccttctgccaccatcattgcg	ath-miR156h	TGACAGAAGAAAGAGAGCAC	5'	Diff	gp2a	...(((((((((((...(((...(((((((((((((((((((((((((((((..(((((.((((((((((....))).....)).)).))).)))))..)))))))).)))))))))))))))))..))))....)))...)))))))))))...	149	37.4	-62.6	1.1	520.5	384.5	556.5	864.5	495	139	109	238.5	1059.5	331	279	398	334.5	520	872.5	420.5	982	450	447.5	359	528.5	477.5	602	1080	423.5	351.5
9	12	ath-miR156h_R+1_1ss5AG	TGACGGAAGAAAGAGAGCACA	21	arahy.Tifrunner.gnm1.Arahy.15	+	19794138	19794305	agtagttaataagacacaaaattagaatacaagtgagatTGACGGAAGAAAGAGAGCACAtgctgccagacagtcattgctatgtatctacatgttcttgcagtgcgtgctctctttttttctgtcaatctccagtttatccttcattttttgtctttgttttctcat	9	gma-MIR156p,gma-MIR156t,ath-MIR156h,aly-MIR156h,ppe-MIR156a,ppe-MIR156b,csi-MIR156g,lus-MIR156d,cas-MIR156h,	ath-MIR156h	atgaaaaatgtTGACAGAAGAAAGAGAGCACaacctgggattagcaaaaagatagttttgcccttgtcgggagtgtgctctctttccttctgccaccatcattgcg	ath-miR156h	TGACAGAAGAAAGAGAGCAC	5'	Diff	gp2a	...((..(((((((((.(((((.((.(((.....(((((((((((((((((((((((((..(((((.(((((((...(((...)))...)).)).))).)))))..)))))))).))))))))))))))))).....))).))..))))).)))))).)))..))...	162	36.3	-60	1	520.5	384.5	556.5	864.5	495	139	109	238.5	1059.5	331	279	398	334.5	520	872.5	420.5	982	450	447.5	359	528.5	477.5	602	1080	423.5	351.5
10	13	mdm-MIR156d-p3_1ss12TC	GCTCACTTCTCCTTCTGTCAGCC	23	arahy.Tifrunner.gnm1.Arahy.10	+	94596538	94596712	gttttgcaccctgggctcttgattatttattttctcttggaacatagaaattgacagaagagagtgagcacacagaagcactcgttataattctataccgttgctcttgcgtGCTCACTTCTCCTTCTGTCAGCTtccagtgccggaaaaatgaaaatcaccgcccgtgtgatct	2	mdm-MIR156d,mdm-MIR156l,	mdm-MIR156d	tggactagtagcgagtggtggTGACAGAAGAGAGTGAGCACactcgggcaattgtataaagccatacctttgcgtgatgtgtgctcacttctctttctgtcagccgcacgccgcccyccgccca	mdm-MIR156d-p3	gctcacttctctttctgtcagcc	3'	New	gp2a	...(..(((...((((...(((((.((((((((.((.(((.((...(((..((((((((((((((((((((.((..((((..((.((((....)))).)).))))..)).)))))))).))).)))))))))..)))..)).))))))))))))))))))..)))))))..)...	169	44	-67.5	0.9	4.5	0	0	0	0	0	0	0	0	0	0	0	0	0	0	4	3.5	0	4.5	3	0	0	4	0	2.5	0
11	13	mdm-MIR156d-p3_1ss12TC	GCTCACTTCTCCTTCTGTCAGCC	23	arahy.Tifrunner.gnm1.Arahy.20	+	117270413	117270509	atagaaattgacagaagagagtgagcacacagaagcactcgttataattctataccgttgctcttgcgtGCTCACTTCTCCTTCTGTCAGCTtccag	2	mdm-MIR156d,mdm-MIR156l,	mdm-MIR156d	tggactagtagcgagtggtggTGACAGAAGAGAGTGAGCACactcgggcaattgtataaagccatacctttgcgtgatgtgtgctcacttctctttctgtcagccgcacgccgcccyccgccca	mdm-MIR156d-p3	gctcacttctctttctgtcagcc	3'	New	gp2a	...(((..((((((((((((((((((((.((..((((..((.((((....)))).)).))))..)).)))))))).))).)))))))))..)))...	91	44.3	-44.3	1	4.5	0	0	0	0	0	0	0	0	0	0	0	0	0	0	4	3.5	0	4.5	3	0	0	4	0	2.5	0
12	14	csi-miR156h-5p_2ss15AG20TA	ACAGAAGATAGAGAGCACAAA	21	arahy.Tifrunner.gnm1.Arahy.15	-	143407452	143407603	attggtagagttgttgACAGAAGATAGAGAGCACAAAagatgatatgcatatagatatatagtcacatacatacacatatggatggatcaaaagccaattgcattttatttctttgtGCTCTCTAAGCTTCTGTCATCactcttcagcctcc	98	ahy-MIR156b,mtr-MIR156f,mtr-MIR156h,mtr-MIR156e,mtr-MIR156g,gma-MIR156m,gma-MIR156c,gma-MIR156j,gma-MIR156l,gma-MIR156g,gma-MIR156d,gma-MIR156i,gma-MIR156e,vun-MIR156b,ptc-MIR156h,ptc-MIR156i,ptc-MIR156j,ptc-MIR156g,ath-MIR157b,ath-MIR157c,ath-MIR157a,ath-MIR157d,ath-MIR156h,mdm-MIR156ab,mdm-MIR156ac,mdm-MIR156aa,mdm-MIR156q,mdm-MIR156s,mdm-MIR156y,mdm-MIR156p,mdm-MIR156r,mdm-MIR156x,mdm-MIR156z,…	csi-MIR156h	gaacttttgttgACAGAAGATAGAGAACACATAaattaaaatgccattaatcaaacgcattttaaatctttgtgctctctatattctgtcatcaacgtgca	csi-miR156h-5p	ACAGAAGATAGAGAACACATA	5'	Diff	gp2a	...(((((((.((.(((((((((.(((((((((((((((((((.(((((............(((.(((.((((....)))).))))))...........))))).)))))).)))))))))))))..))))))))).))))))...)))...	146	36.2	-56.2	1	96	50	69	58	45.5	0	0	6.5	164.5	69	60	52	54	81	174	51.5	80.5	58	17.5	22	16	73.5	77	111	34	28.5
13	15	mtr-miR160a_1ss21AG	TGCCTGGCTCCCTGTATGCCG	21	arahy.Tifrunner.gnm1.Arahy.16	-	40916382	40916475	cttggtgTGCCTGGCTCCCTGTATGCCAtttgtagagctcgtcaaaacattgacagccttaacaaatggCGTGCGAGGAGCCATGCATGCtgtc	6	mtr-MIR160d,mtr-MIR160a,mes-MIR160c,vvi-MIR160d,csi-MIR160c,csi-MIR160b,	mtr-MIR160a	agatatatatactaattgcgTGCCTGGCTCCCTGTATGCCAtttgtagagttcatcaagatgttgatgactttaatgaatggcgtgcgaggagccatgcatgttgtgtatattttctat	mtr-miR160a	TGCCTGGCTCCCTGTATGCCA	5'	Diff	gp2a	...((..(((.(((((((..(((((((((((((((.(((.(((((....))))))))))..)))))))))))))..))))))).)))..))...	88	52.1	-53.1	1.1	41	3	12.5	7	3	0	0	0	13.5	0	3	4	3	4.5	0	29	8.5	35	25.5	29.5	32.5	19.5	68.5	4.5	30	33
13	16	csi-miR160c-3p_L-1R+1	CGTGCGAGGAGCCATGCATGC	21	arahy.Tifrunner.gnm1.Arahy.16	-	40916382	40916475	cttggtgTGCCTGGCTCCCTGTATGCCAtttgtagagctcgtcaaaacattgacagccttaacaaatggCGTGCGAGGAGCCATGCATGCtgtc	6	mtr-MIR160d,mtr-MIR160a,mes-MIR160c,vvi-MIR160d,csi-MIR160c,csi-MIR160b,	csi-MIR160c	tgatatatagtaTGCCTGGCTCCCTGTATGCTTtttgcaaagcccatcagaagattggtggtcttggcggataGCGTGCGAGGAGCCATGCATGctaaatttag	csi-miR160c-3p	GCGTGCGAGGAGCCATGCATG	3'	Diff	gp2a	...((..(((.(((((((..(((((((((((((((.(((.(((((....))))))))))..)))))))))))))..))))))).)))..))...	88	52.1	-53.1	1.1	0	0	5	0	0	0	0	0	0	0	0	0	0	0	0	0	0	0	0	0	0	0	0	0	0	0
14	15	mtr-miR160a_1ss21AG	TGCCTGGCTCCCTGTATGCCG	21	arahy.Tifrunner.gnm1.Arahy.19	-	146931150	146931241	tgtatgTGCCTGGCTCCCTGTATGCCAtttgtagagctcatcgaaatatctatgacctctgtagatggCGTATGAGGAGCCAAGCATATTcc	7	mtr-MIR160d,mtr-MIR160a,mdm-MIR160c,mes-MIR160c,csi-MIR160b,csi-MIR160c,eun-MIR160,	mtr-MIR160a	agatatatatactaattgcgTGCCTGGCTCCCTGTATGCCAtttgtagagttcatcaagatgttgatgactttaatgaatggcgtgcgaggagccatgcatgttgtgtatattttctat	mtr-miR160a	TGCCTGGCTCCCTGTATGCCA	5'	Diff	gp2a	...((((((.(((((((..(((((((((((..((((.((((.((....)).)))).))))..)))))))))))..))))))).))))))...	86	46.7	-48.8	1.1	41	3	12.5	7	3	0	0	0	13.5	0	3	4	3	4.5	0	29	8.5	35	25.5	29.5	32.5	19.5	68.5	4.5	30	33
14	17	csi-miR160b-3p_L-1R+2_1ss6CT	CGTATGAGGAGCCAAGCATATA	22	arahy.Tifrunner.gnm1.Arahy.19	-	146931150	146931241	tgtatgTGCCTGGCTCCCTGTATGCCAtttgtagagctcatcgaaatatctatgacctctgtagatggCGTATGAGGAGCCAAGCATATTcc	7	mtr-MIR160d,mtr-MIR160a,mdm-MIR160c,mes-MIR160c,csi-MIR160b,csi-MIR160c,eun-MIR160,	csi-MIR160b	gtttctaaagaaggtgaaattaatgggttaTGCCTGGCTCCCTGTATGCCGcaagcagacgacaatctgccggagattggccgttgctggtgGCGTACGAGGAGCCAAGCATActattcttccttccctttctctttatatgc	csi-miR160b-3p	GCGTACGAGGAGCCAAGCATA	3'	Diff	gp2a	...((((((.(((((((..(((((((((((..((((.((((.((....)).)))).))))..)))))))))))..))))))).))))))...	86	46.7	-48.8	1.1	0	0	0	0	0	0	0	0	0	0	0	0	0	0	0	0	5	0	0	0	0	0	0	0	0	0
15	18	ptc-miR162a_R+1	TCGATAAACCTCTGCATCCAGT	22	arahy.Tifrunner.gnm1.Arahy.01	+	108768452	108768608	tgtgaattagcgtatgaatttgtaaggtgaagtcactggaggcagcggttcatcgatctcttcctgaatttggctgtggaatcatacacaaagcaagaatcggTCGATAAACCTCTGCATCCAGCgctcactttgcctctttttcgtgtttttcttt	4	ptc-MIR162b,bra-MIR162,cas-MIR162a,htu-MIR162a,	ptc-MIR162b	tgagaagacactggaggcagcggttcatcgatcttttcctgaagatttttttgttttacacgaacaacacgaaccgaTCGATAAACCTCTGCATCCAGtgcttccct	ptc-miR162a	TCGATAAACCTCTGCATCCAG	3'	Diff	gp2a	...(((...(((...(((...(((((((((.((..(((((.((((.((((.(((((((..(((.((..((((..((((....))))..)))).)).)))..))))))).)))).)))).))))).)))))))))))...)))..)))....)))...	151	43.3	-52.1	0.8	21	22	21	27	21.5	5.5	3.5	7.5	58.5	8.5	17	20	16	20.5	33.5	11.5	28.5	13.5	5	9.5	7.5	36.5	18	54.5	13	13.5
16	18	ptc-miR162a_R+1	TCGATAAACCTCTGCATCCAGT	22	arahy.Tifrunner.gnm1.Arahy.11	-	132159745	132159932	tttgtgaatttgaatgtgaattagtgtatgaatttgtaaggtgaagtcactggaggcagcggttcatcgatctcttcctgaatttggctgtggaatcatacacaaagcaagaatcggTCGATAAACCTCTGCATCCAGCgctcactttgcctctttctcttttttttctttctttaattatttatttc	4	ptc-MIR162b,bra-MIR162,cas-MIR162a,htu-MIR162a,	ptc-MIR162b	tgagaagacactggaggcagcggttcatcgatcttttcctgaagatttttttgttttacacgaacaacacgaaccgaTCGATAAACCTCTGCATCCAGtgcttccct	ptc-miR162a	TCGATAAACCTCTGCATCCAG	3'	Diff	gp2a	...(((((((((((...(((..((.....(((...(((((((((.((..(((((.((((.((((.(((((((..(((.((..((((..((((....))))..)))).)).)))..))))))).)))).)))).))))).)))))))))))....)))....))..)))....)))))..))))))...	182	37.8	-51.9	0.7	21	22	21	27	21.5	5.5	3.5	7.5	58.5	8.5	17	20	16	20.5	33.5	11.5	28.5	13.5	5	9.5	7.5	36.5	18	54.5	13	13.5
17	19	mtr-miR164a_1ss21AT	TGGAGAAGCAGGGCACGTGCT	21	arahy.Tifrunner.gnm1.Arahy.02	-	99241472	99241589	attgagtgaatagttcttgtTGGAGAAGCAGGGCACGTGCAaaatttttttgatttttatagtcgaaattattttgttgcacgtgttctttttctctaacacggattttttactcttt	78	mtr-MIR164c,mtr-MIR164a,mtr-MIR164b,gma-MIR164e,gma-MIR164j,gma-MIR164f,gma-MIR164h,gma-MIR164c,gma-MIR164i,gma-MIR164g,gma-MIR164d,gma-MIR164a,gma-MIR164b,gma-MIR164k,ptc-MIR164e,ptc-MIR164b,ptc-MIR164c,ptc-MIR164a,ptc-MIR164d,ath-MIR164a,ath-MIR164b,ath-MIR164c,mdm-MIR164c,mdm-MIR164b,mdm-MIR164e,mdm-MIR164f,mdm-MIR164d,mdm-MIR164a,aly-MIR164b,aly-MIR164a,aly-MIR164c,ppe-MIR164c,ppe-MIR164a,ppe…	mtr-MIR164b	caagaTGGAGAAGCAGGGCACGTGCAatactaactcatgaacatacacacatgatggaagtgaatacaaagagaatctacattctcttatgtttcatttttttaattgagttagttcttcatgtgcccctcttccccatcatga	mtr-miR164a	TGGAGAAGCAGGGCACGTGCA	5'	Diff	gp2a	...(((((((.(((((.((((((((((..((..((((((((((((..((((((((.....))))))))..)))...)))))))))..))..)))))))))).))))).)))))))...	112	32.2	-52.2	1.4	85	23	32.5	51.5	26	8	3.5	12.5	57	18.5	14	16.5	11.5	29.5	27.5	65.5	30.5	66.5	58.5	67.5	73.5	39	125	35	53.5	44
18	19	mtr-miR164a_1ss21AT	TGGAGAAGCAGGGCACGTGCT	21	arahy.Tifrunner.gnm1.Arahy.06	-	5306291	5306406	ccttggtgggttggtcttgtTGGAGAAGCAGGGCACGTGCAaacatctctatacctttctctggtggggtctaactgcacgtgttctccttctccaacatgattctcccaccaccc	78	mtr-MIR164c,mtr-MIR164a,mtr-MIR164b,gma-MIR164i,gma-MIR164g,gma-MIR164d,gma-MIR164a,gma-MIR164e,gma-MIR164j,gma-MIR164b,gma-MIR164f,gma-MIR164k,gma-MIR164h,gma-MIR164c,ptc-MIR164e,ptc-MIR164a,ptc-MIR164b,ptc-MIR164c,ptc-MIR164d,ath-MIR164b,ath-MIR164a,ath-MIR164c,mdm-MIR164f,mdm-MIR164d,mdm-MIR164c,mdm-MIR164b,mdm-MIR164e,mdm-MIR164a,aly-MIR164b,aly-MIR164a,aly-MIR164c,ppe-MIR164c,ppe-MIR164a,ppe…	mtr-MIR164b	caagaTGGAGAAGCAGGGCACGTGCAatactaactcatgaacatacacacatgatggaagtgaatacaaagagaatctacattctcttatgtttcatttttttaattgagttagttcttcatgtgcccctcttccccatcatga	mtr-miR164a	TGGAGAAGCAGGGCACGTGCA	5'	Diff	gp2a	...(((((((...(((.(((((((((((.((..((((((((.....((((..(((.......)))))))......))))))))..)).))))))))))).)))...)))))))...	110	52.6	-60.1	1	85	23	32.5	51.5	26	8	3.5	12.5	57	18.5	14	16.5	11.5	29.5	27.5	65.5	30.5	66.5	58.5	67.5	73.5	39	125	35	53.5	44
19	20	mtr-miR164a_1ss19GA	TGGAGAAGCAGGGCACGTACA	21	arahy.Tifrunner.gnm1.Arahy.02	-	99281338	99281454	attgagtgaatagttcttgtTGGAGAAGCAGGGCACGTGCAaaatttttttgattttcataatcaaaattattttttgcacgtgttctttttctccaacacgggtttttcactcttt	68	mtr-MIR164c,mtr-MIR164a,mtr-MIR164b,gma-MIR164e,gma-MIR164j,gma-MIR164f,gma-MIR164h,gma-MIR164c,gma-MIR164i,gma-MIR164g,gma-MIR164d,gma-MIR164a,gma-MIR164b,gma-MIR164k,ptc-MIR164e,ptc-MIR164b,ptc-MIR164c,ptc-MIR164a,ptc-MIR164d,ath-MIR164a,ath-MIR164b,mdm-MIR164c,mdm-MIR164b,mdm-MIR164e,mdm-MIR164f,mdm-MIR164d,aly-MIR164b,aly-MIR164a,ppe-MIR164c,ppe-MIR164a,ppe-MIR164b,mes-MIR164a,mes-MIR164b,mes…	mtr-MIR164b	caagaTGGAGAAGCAGGGCACGTGCAatactaactcatgaacatacacacatgatggaagtgaatacaaagagaatctacattctcttatgtttcatttttttaattgagttagttcttcatgtgcccctcttccccatcatga	mtr-miR164a	TGGAGAAGCAGGGCACGTGCA	5'	Diff	gp2a	...(((((((.((..(.((((((((((..((..(((((((((((...((((((((.....)))))))).....)))))))))))..))..)))))))))).)..)).)))))))...	111	33.3	-57.4	1.5	17.5	0	0	8.5	5	0	0	0	13	0	5	6	0	5	16.5	23	11.5	17	8	8	16	7.5	38	12.5	18	11.5
20	21	mtr-miR164a_R-2	TGGAGAAGCAGGGCACGTG	19	arahy.Tifrunner.gnm1.Arahy.06	+	8325271	8325396	aatggatgagacactccttgtTGGAGAAGCAGGGCACGTGcaaattctcttcacacattcttccgaatgccattgatgaacactttgcacgcgctccccttctccaacacgggtttctcacccctt	77	mtr-MIR164c,mtr-MIR164a,mtr-MIR164b,gma-MIR164e,gma-MIR164j,gma-MIR164f,gma-MIR164h,gma-MIR164c,gma-MIR164i,gma-MIR164g,gma-MIR164d,gma-MIR164a,gma-MIR164b,gma-MIR164k,ptc-MIR164e,ptc-MIR164b,ptc-MIR164c,ptc-MIR164a,ptc-MIR164d,ath-MIR164a,ath-MIR164b,ath-MIR164c,mdm-MIR164c,mdm-MIR164b,mdm-MIR164e,mdm-MIR164f,mdm-MIR164d,aly-MIR164b,aly-MIR164c,aly-MIR164a,ppe-MIR164c,ppe-MIR164a,ppe-MIR164b,mes…	mtr-MIR164b	caagaTGGAGAAGCAGGGCACGTGCAatactaactcatgaacatacacacatgatggaagtgaatacaaagagaatctacattctcttatgtttcatttttttaattgagttagttcttcatgtgcccctcttccccatcatga	mtr-miR164a	TGGAGAAGCAGGGCACGTGCA	5'	Diff	gp2a	...((.(((((.((.((.(((((((((((..((((.((((((((...((.(((..(((((....)))))....))).))....)))))))).))))..))))))))))).)))).))))).))...	120	50	-55.4	0.9	8	8	0	11	0	0	0	0	18	0	0	12	0	6	10	0	5	8	5	0	5	6	11	15	0	6
21	22	mtr-miR164a_1ss5GT	TGGATAAGCAGGGCACGTGCA	21	arahy.Tifrunner.gnm1.Arahy.12	-	116164744	116164864	attgagtgaatagttcttgtTGGAGAAGCAGGGCACGTGCAaattttttttttttaatttttatagtcgaaattgttttctgcacgtgctctttttctccaacacggatttttcactcttt	77	mtr-MIR164c,mtr-MIR164a,mtr-MIR164b,gma-MIR164e,gma-MIR164j,gma-MIR164f,gma-MIR164h,gma-MIR164c,gma-MIR164i,gma-MIR164g,gma-MIR164d,gma-MIR164a,gma-MIR164b,gma-MIR164k,ptc-MIR164e,ptc-MIR164b,ptc-MIR164c,ptc-MIR164a,ptc-MIR164d,ath-MIR164a,ath-MIR164b,ath-MIR164c,mdm-MIR164c,mdm-MIR164b,mdm-MIR164e,mdm-MIR164f,mdm-MIR164d,aly-MIR164b,aly-MIR164a,aly-MIR164c,ppe-MIR164c,ppe-MIR164a,ppe-MIR164b,mes…	mtr-MIR164b	caagaTGGAGAAGCAGGGCACGTGCAatactaactcatgaacatacacacatgatggaagtgaatacaaagagaatctacattctcttatgtttcatttttttaattgagttagttcttcatgtgcccctcttccccatcatga	mtr-miR164a	TGGAGAAGCAGGGCACGTGCA	5'	Diff	gp2a	...(((((((.(((((.((((((((((..((((((((((((..........(((..(((.....)))..)))........))))))))))))..)))))))))).))))).)))))))...	115	33.9	-51.9	1.3	14.5	10.5	3	28	2.5	6	0	2.5	47.5	0	7.5	12	2.5	11.5	31.5	8.5	23	11	0	0	16.5	14	28.5	22.5	4.5	5
22	23	mtr-miR164a_1ss21AC	TGGAGAAGCAGGGCACGTGCC	21	arahy.Tifrunner.gnm1.Arahy.16	-	11625273	11625392	ggatgagaaactccttgtTGGAGAAGCAGGGCACGTGCAaattctcttgacacattcttccgaatgccattgatgaacactttgcacgcgctccccttctccaacacgggtttctcaccc	78	mtr-MIR164c,mtr-MIR164a,mtr-MIR164b,gma-MIR164e,gma-MIR164j,gma-MIR164f,gma-MIR164h,gma-MIR164c,gma-MIR164i,gma-MIR164g,gma-MIR164d,gma-MIR164a,gma-MIR164b,gma-MIR164k,ptc-MIR164e,ptc-MIR164b,ptc-MIR164c,ptc-MIR164a,ptc-MIR164d,ath-MIR164a,ath-MIR164b,ath-MIR164c,mdm-MIR164c,mdm-MIR164b,mdm-MIR164e,mdm-MIR164f,mdm-MIR164d,mdm-MIR164a,aly-MIR164b,aly-MIR164a,aly-MIR164c,ppe-MIR164c,ppe-MIR164a,ppe…	mtr-MIR164b	caagaTGGAGAAGCAGGGCACGTGCAatactaactcatgaacatacacacatgatggaagtgaatacaaagagaatctacattctcttatgtttcatttttttaattgagttagttcttcatgtgcccctcttccccatcatga	mtr-miR164a	TGGAGAAGCAGGGCACGTGCA	5'	Diff	gp2a	((.((((((((.((.(((((((((((..((((.(((((((((((((......(((((....))))).....)).)))...)))))))).))))..))))))))))).)))))))))))).	119	50.8	-57.8	0.9	30.5	15.5	12	29.5	8.5	2.5	0	8.5	31.5	8	6.5	8	5	8	19	18	42	12	16	17.5	24	30.5	40	21	13	13
23	24	mdm-MIR166c-p5_1ss18GA	AATGTTGTCTGGTTCGAAATC	21	arahy.Tifrunner.gnm1.Arahy.02	-	11577795	11577900	agaggttgaggggAATGTTGTCTGGTTCGAAATCattcatcatctcaaatatggtacagcaggataaaaaatgattTCGGACCAGGCTTCATTCCCCtcagctatt	184	mtr-MIR166e,mtr-MIR166g,mtr-MIR166a,mtr-MIR166b,mtr-MIR166c,mtr-MIR166f,gma-MIR166t,gma-MIR166b,gma-MIR166a,gma-MIR166d,gma-MIR166c,gma-MIR166g,gma-MIR166e,gma-MIR166i,gma-MIR166p,gma-MIR166u,gma-MIR166s,gma-MIR166n,gma-MIR166f,gma-MIR166o,gma-MIR166q,gma-MIR166r,gma-MIR166j,gma-MIR166h,gma-MIR166m,gma-MIR166k,lja-MIR166,pvu-MIR166a,ptc-MIR166d,ptc-MIR166a,ptc-MIR166i,ptc-MIR166f,ptc-MIR166l,ptc-…	mdm-MIR166c	agttgtggggaatgttgtctggttcgagatctttcaataaaacttgaagatcgttatcatctgaatgatcTCGGACCAGGCTTCATTCCCCtcaact	mdm-MIR166c-p5	aatgttgtctggttcgagatc	5'	New	gp2a	...((((((((((((((..((((((((((((((((((....((((................))))....))))))))))))))))))..))))))))))))))...	100	41.5	-53.9	1.2	172.5	116	256.5	377	200	24.5	7	64.5	280.5	178	85.5	82	106	245	288	134.5	274.5	160	72.5	49	111.5	110	208	175	80.5	77
23	25	mtr-miR166a_1ss9GT	TCGGACCATGCTTCATTCCCC	21	arahy.Tifrunner.gnm1.Arahy.02	-	11577795	11577900	agaggttgaggggAATGTTGTCTGGTTCGAAATCattcatcatctcaaatatggtacagcaggataaaaaatgattTCGGACCAGGCTTCATTCCCCtcagctatt	184	mtr-MIR166e,mtr-MIR166g,mtr-MIR166a,mtr-MIR166b,mtr-MIR166c,mtr-MIR166f,gma-MIR166t,gma-MIR166b,gma-MIR166a,gma-MIR166d,gma-MIR166c,gma-MIR166g,gma-MIR166e,gma-MIR166i,gma-MIR166p,gma-MIR166u,gma-MIR166s,gma-MIR166n,gma-MIR166f,gma-MIR166o,gma-MIR166q,gma-MIR166r,gma-MIR166j,gma-MIR166h,gma-MIR166m,gma-MIR166k,lja-MIR166,pvu-MIR166a,ptc-MIR166d,ptc-MIR166a,ptc-MIR166i,ptc-MIR166f,ptc-MIR166l,ptc-…	mtr-MIR166a	cagacatacgaaggagttcaggggaatggtgtctgattcgagaccattcgtcacaagtaaacagtagccttgagaatgatcTCGGACCAGGCTTCATTCCCCctagctcatagtatcatgc	mtr-miR166a	TCGGACCAGGCTTCATTCCCC	3'	Diff	gp2a	...((((((((((((((..((((((((((((((((((....((((................))))....))))))))))))))))))..))))))))))))))...	100	41.5	-53.9	1.2	938.5	19905.5	641	801	458	3793	2857.5	103.5	12510.5	16239.5	283	257	308	23853.5	571.5	446	7937	528.5	258	291	272.5	39040	838.5	8643	412	453
24	24	mdm-MIR166c-p5_1ss18GA	AATGTTGTCTGGTTCGAAATC	21	arahy.Tifrunner.gnm1.Arahy.12	-	14952805	14952910	agaggttgaggggAATGTTGTCTGGTTCGAAATCattcatcatctcgaatatgataaggcaggatgaaaagtgattTCGGACCAGGCTTCATTCCCCtcagctatt	187	mtr-MIR166e,mtr-MIR166g,mtr-MIR166a,mtr-MIR166b,mtr-MIR166c,mtr-MIR166f,gma-MIR166t,gma-MIR166b,gma-MIR166a,gma-MIR166d,gma-MIR166c,gma-MIR166g,gma-MIR166e,gma-MIR166i,gma-MIR166p,gma-MIR166u,gma-MIR166s,gma-MIR166n,gma-MIR166f,gma-MIR166o,gma-MIR166q,gma-MIR166r,gma-MIR166m,gma-MIR166j,gma-MIR166h,gma-MIR166k,lja-MIR166,pvu-MIR166a,ptc-MIR166d,ptc-MIR166a,ptc-MIR166i,ptc-MIR166f,ptc-MIR166l,ptc-…	mdm-MIR166c	agttgtggggaatgttgtctggttcgagatctttcaataaaacttgaagatcgttatcatctgaatgatcTCGGACCAGGCTTCATTCCCCtcaact	mdm-MIR166c-p5	aatgttgtctggttcgagatc	5'	New	gp2a	...((((((((((((((..((((((((((((((((((..((((((................))))))..))))))))))))))))))..))))))))))))))...	100	43.4	-59.8	1.3	172.5	116	256.5	377	200	24.5	7	64.5	280.5	178	85.5	82	106	245	288	134.5	274.5	160	72.5	49	111.5	110	208	175	80.5	77
24	25	mtr-miR166a_1ss9GT	TCGGACCATGCTTCATTCCCC	21	arahy.Tifrunner.gnm1.Arahy.12	-	14952805	14952910	agaggttgaggggAATGTTGTCTGGTTCGAAATCattcatcatctcgaatatgataaggcaggatgaaaagtgattTCGGACCAGGCTTCATTCCCCtcagctatt	187	mtr-MIR166e,mtr-MIR166g,mtr-MIR166a,mtr-MIR166b,mtr-MIR166c,mtr-MIR166f,gma-MIR166t,gma-MIR166b,gma-MIR166a,gma-MIR166d,gma-MIR166c,gma-MIR166g,gma-MIR166e,gma-MIR166i,gma-MIR166p,gma-MIR166u,gma-MIR166s,gma-MIR166n,gma-MIR166f,gma-MIR166o,gma-MIR166q,gma-MIR166r,gma-MIR166m,gma-MIR166j,gma-MIR166h,gma-MIR166k,lja-MIR166,pvu-MIR166a,ptc-MIR166d,ptc-MIR166a,ptc-MIR166i,ptc-MIR166f,ptc-MIR166l,ptc-…	mtr-MIR166a	cagacatacgaaggagttcaggggaatggtgtctgattcgagaccattcgtcacaagtaaacagtagccttgagaatgatcTCGGACCAGGCTTCATTCCCCctagctcatagtatcatgc	mtr-miR166a	TCGGACCAGGCTTCATTCCCC	3'	Diff	gp2a	...((((((((((((((..((((((((((((((((((..((((((................))))))..))))))))))))))))))..))))))))))))))...	100	43.4	-59.8	1.3	938.5	19905.5	641	801	458	3793	2857.5	103.5	12510.5	16239.5	283	257	308	23853.5	571.5	446	7937	528.5	258	291	272.5	39040	838.5	8643	412	453
25	26	mtr-miR166a_R-2	TCGGACCAGGCTTCATTCC	19	arahy.Tifrunner.gnm1.Arahy.03	+	118401035	118401235	agagaggatgagttggtggttgaggggaatgttggctggctcgaggcttcaatttggtttgggctTCGGACCAGGCTTCATTCCtctcaaactaactaaactccatcattatattcttctttttcttcttcttcatgaggaaggtggtggctgcttctgctgcaaaggttaaggttgagaGGAATGTTGTCTGGCTCGAGA	178	mtr-MIR166e,mtr-MIR166g,mtr-MIR166b,mtr-MIR166a,mtr-MIR166c,mtr-MIR166f,gma-MIR166l,gma-MIR166m,gma-MIR166t,gma-MIR166b,gma-MIR166a,gma-MIR166d,gma-MIR166c,gma-MIR166r,gma-MIR166g,gma-MIR166e,gma-MIR166i,gma-MIR166p,gma-MIR166u,gma-MIR166s,gma-MIR166n,gma-MIR166j,gma-MIR166f,gma-MIR166k,gma-MIR166h,gma-MIR166o,gma-MIR166q,lja-MIR166,pvu-MIR166a,ptc-MIR166d,ptc-MIR166a,ptc-MIR166i,ptc-MIR166f,ptc-…	mtr-MIR166a	cagacatacgaaggagttcaggggaatggtgtctgattcgagaccattcgtcacaagtaaacagtagccttgagaatgatcTCGGACCAGGCTTCATTCCCCctagctcatagtatcatgc	mtr-miR166a	TCGGACCAGGCTTCATTCCCC	5'	Diff	gp2a	.(((.(((..(((((((..((((((((((((..((((((..(((((((.(((......))))))))))..))).))).)))))))))))))))))))....)))......(((((((((((..((((((((.....))))))))..(..((.......))..).............))))))))))).......)))....	99	46.3	-77.7	0.8	4566	1438.5	3412	3167	1806.5	251	195.5	456	4684.5	1089.5	1245.5	1464.5	1266.5	1765	2590.5	2018	2932	2156	1150	1382.5	1076	2694.5	2899.5	2932	1919	1830
25	27	mtr-miR166e-5p_2ss10GT21GA	GGAATGTTGTCTGGCTCGAGA	21	arahy.Tifrunner.gnm1.Arahy.03	+	118401035	118401235	agagaggatgagttggtggttgaggggaatgttggctggctcgaggcttcaatttggtttgggctTCGGACCAGGCTTCATTCCtctcaaactaactaaactccatcattatattcttctttttcttcttcttcatgaggaaggtggtggctgcttctgctgcaaaggttaaggttgagaGGAATGTTGTCTGGCTCGAGA	178	mtr-MIR166e,mtr-MIR166g,mtr-MIR166b,mtr-MIR166a,mtr-MIR166c,mtr-MIR166f,gma-MIR166l,gma-MIR166m,gma-MIR166t,gma-MIR166b,gma-MIR166a,gma-MIR166d,gma-MIR166c,gma-MIR166r,gma-MIR166g,gma-MIR166e,gma-MIR166i,gma-MIR166p,gma-MIR166u,gma-MIR166s,gma-MIR166n,gma-MIR166j,gma-MIR166f,gma-MIR166k,gma-MIR166h,gma-MIR166o,gma-MIR166q,lja-MIR166,pvu-MIR166a,ptc-MIR166d,ptc-MIR166a,ptc-MIR166i,ptc-MIR166f,ptc-…	mtr-MIR166e	tttgaggGGAATGTTGGCTGGCTCGAGGcttttcagtttcacaaaggaagttcagtcttaattgtatgaactataaggctTCGGACCAGGCTTCATTCCCCtcaaa	mtr-miR166e-5p	GGAATGTTGGCTGGCTCGAGG	3'	Diff	gp2a	.(((.(((..(((((((..((((((((((((..((((((..(((((((.(((......))))))))))..))).))).)))))))))))))))))))....)))......(((((((((((..((((((((.....))))))))..(..((.......))..).............))))))))))).......)))....	99	46.3	-77.7	0.8	248.5	62	127	277.5	130.5	76.5	80.5	140.5	273.5	72	54	138.5	51.5	184	153	149	258	171.5	305.5	229	520	167.5	329.5	269	214	134
26	28	mtr-miR166e-5p_L-1R+1_1ss10GT	GAATGTTGTCTGGCTCGAGGA	21	arahy.Tifrunner.gnm1.Arahy.16	+	23732088	23732226	ggccgggaaagttttgttttgttgagggGAATGTTGTCTGGCTCGAGGAcccttcctttcccttcccttcccttctctaaatgaaataagagtcgTCGGACCAGGCTTCATTCCccccaattactcgctttcaccgatt	180	mtr-MIR166e,mtr-MIR166g,mtr-MIR166b,mtr-MIR166a,mtr-MIR166c,mtr-MIR166f,gma-MIR166l,gma-MIR166m,gma-MIR166t,gma-MIR166b,gma-MIR166a,gma-MIR166d,gma-MIR166c,gma-MIR166r,gma-MIR166g,gma-MIR166e,gma-MIR166i,gma-MIR166p,gma-MIR166u,gma-MIR166s,gma-MIR166n,gma-MIR166j,gma-MIR166f,gma-MIR166k,gma-MIR166h,gma-MIR166o,gma-MIR166q,lja-MIR166,pvu-MIR166a,ptc-MIR166d,ptc-MIR166a,ptc-MIR166i,ptc-MIR166f,ptc-…	mtr-MIR166e	tttgaggGGAATGTTGGCTGGCTCGAGGcttttcagtttcacaaaggaagttcagtcttaattgtatgaactataaggctTCGGACCAGGCTTCATTCCCCtcaaa	mtr-miR166e-5p	GGAATGTTGGCTGGCTCGAGG	5'	Diff	gp2a	...(((((((((...((...((((.((((((((..((((((..(((.(((.(((..((((......................)))).))).))).)))..))))))..)))))))).)))).))..)))))).)))...	133	49.6	-51.3	0.7	273	215	340	469.5	256	59	53	93	653.5	215	118	187	180	276	543.5	196	434	196	136	132	204.5	340	252	413	250	135
26	26	mtr-miR166a_R-2	TCGGACCAGGCTTCATTCC	19	arahy.Tifrunner.gnm1.Arahy.16	+	23732088	23732226	ggccgggaaagttttgttttgttgagggGAATGTTGTCTGGCTCGAGGAcccttcctttcccttcccttcccttctctaaatgaaataagagtcgTCGGACCAGGCTTCATTCCccccaattactcgctttcaccgatt	180	mtr-MIR166e,mtr-MIR166g,mtr-MIR166b,mtr-MIR166a,mtr-MIR166c,mtr-MIR166f,gma-MIR166l,gma-MIR166m,gma-MIR166t,gma-MIR166b,gma-MIR166a,gma-MIR166d,gma-MIR166c,gma-MIR166r,gma-MIR166g,gma-MIR166e,gma-MIR166i,gma-MIR166p,gma-MIR166u,gma-MIR166s,gma-MIR166n,gma-MIR166j,gma-MIR166f,gma-MIR166k,gma-MIR166h,gma-MIR166o,gma-MIR166q,lja-MIR166,pvu-MIR166a,ptc-MIR166d,ptc-MIR166a,ptc-MIR166i,ptc-MIR166f,ptc-…	mtr-MIR166a	cagacatacgaaggagttcaggggaatggtgtctgattcgagaccattcgtcacaagtaaacagtagccttgagaatgatcTCGGACCAGGCTTCATTCCCCctagctcatagtatcatgc	mtr-miR166a	TCGGACCAGGCTTCATTCCCC	3'	Diff	gp2a	...(((((((((...((...((((.((((((((..((((((..(((.(((.(((..((((......................)))).))).))).)))..))))))..)))))))).)))).))..)))))).)))...	133	49.6	-51.3	0.7	4566	1438.5	3412	3167	1806.5	251	195.5	456	4684.5	1089.5	1245.5	1464.5	1266.5	1765	2590.5	2018	2932	2156	1150	1382.5	1076	2694.5	2899.5	2932	1919	1830
27	29	csi-miR166c-5p_L-1R+1_1ss8TC	GGAATGCTGTCTGGTTCGAGA	21	arahy.Tifrunner.gnm1.Arahy.05	+	38067447	38067552	aaggagttgaggGGAATGCTGTCTGGTTCGAGAccattccttccattaaccaatatgcggatggtcagaatgatCTCGGACCAGGCTTCATTCCCcccagctcaaa	159	mtr-MIR166f,mtr-MIR166g,mtr-MIR166a,mtr-MIR166e,gma-MIR166k,gma-MIR166a,gma-MIR166c,gma-MIR166t,gma-MIR166b,gma-MIR166d,gma-MIR166r,gma-MIR166u,gma-MIR166s,gma-MIR166n,gma-MIR166j,gma-MIR166f,gma-MIR166h,gma-MIR166o,gma-MIR166q,gma-MIR166g,gma-MIR166e,gma-MIR166i,gma-MIR166p,gma-MIR166m,lja-MIR166,pvu-MIR166a,ptc-MIR166n,ptc-MIR166o,ptc-MIR166a,ptc-MIR166b,ptc-MIR166j,ptc-MIR166k,ptc-MIR166e,ptc-…	csi-MIR166c	ttcctcctcgatcatacatgaacggttgagGGGAATGTTGTCTGGTTCGAGatcactcgtggacgaattaattaataacttattgtcttttgaatgattTCGGACCAGGCTTCATTCCCCCcaactcagtttaattgc	csi-miR166c-5p	GGGAATGTTGTCTGGTTCGAG	5'	Diff	gp2a	...((((((.((((((((..(((((((((((((.(((((...(((((...(.....)..)))))...))))).)))))))))))))..)))))))).))))))...	100	50	-59.2	1.1	17.5	14.5	17.5	12.5	12	0	0	3.5	45	23.5	6.5	10	5.5	18	27	9	14.5	13	8	5	4	19	23.5	17.5	12	3.5
27	30	mtr-miR166c_L+1R-1_1ss21TC	CTCGGACCAGGCTTCATTCCC	21	arahy.Tifrunner.gnm1.Arahy.05	+	38067447	38067552	aaggagttgaggGGAATGCTGTCTGGTTCGAGAccattccttccattaaccaatatgcggatggtcagaatgatCTCGGACCAGGCTTCATTCCCcccagctcaaa	159	mtr-MIR166f,mtr-MIR166g,mtr-MIR166a,mtr-MIR166e,gma-MIR166k,gma-MIR166a,gma-MIR166c,gma-MIR166t,gma-MIR166b,gma-MIR166d,gma-MIR166r,gma-MIR166u,gma-MIR166s,gma-MIR166n,gma-MIR166j,gma-MIR166f,gma-MIR166h,gma-MIR166o,gma-MIR166q,gma-MIR166g,gma-MIR166e,gma-MIR166i,gma-MIR166p,gma-MIR166m,lja-MIR166,pvu-MIR166a,ptc-MIR166n,ptc-MIR166o,ptc-MIR166a,ptc-MIR166b,ptc-MIR166j,ptc-MIR166k,ptc-MIR166e,ptc-…	mtr-MIR166f	tgtttggaatgaggtttgttccaagatcatcacacatcatgtttcttcttccctttcaataattcttgattaatttatgttcatacatctatatatatatctatatatattatcaagtcattacatgcatgggatgagatattgagagtgatcTCGGACCAGGCTTCATTCCTCacacc	mtr-miR166c	TCGGACCAGGCTTCATTCCTC	3'	Diff	gp2a	...((((((.((((((((..(((((((((((((.(((((...(((((...(.....)..)))))...))))).)))))))))))))..)))))))).))))))...	100	50	-59.2	1.1	543.5	135.5	508	337	187	30	23	59.5	379.5	144.5	240	143.5	178	164.5	276.5	269	493.5	264	168.5	375.5	134	294	368	204.5	256.5	281
28	29	csi-miR166c-5p_L-1R+1_1ss8TC	GGAATGCTGTCTGGTTCGAGA	21	arahy.Tifrunner.gnm1.Arahy.15	-	19366270	19366386	aaggagttgaggGGAATGCTGTCTGGTTCGAGAccattccttccattatctgcatccgaacccatgtgcggatgctcagaatgaTCTCGGACCAGGCTTCATTCCccccagctcaaa	189	mtr-MIR166e,mtr-MIR166g,mtr-MIR166b,mtr-MIR166a,mtr-MIR166c,mtr-MIR166f,mtr-MIR166d,gma-MIR166t,gma-MIR166b,gma-MIR166a,gma-MIR166d,gma-MIR166c,gma-MIR166g,gma-MIR166e,gma-MIR166i,gma-MIR166p,gma-MIR166u,gma-MIR166s,gma-MIR166n,gma-MIR166j,gma-MIR166f,gma-MIR166k,gma-MIR166h,gma-MIR166o,gma-MIR166q,gma-MIR166m,gma-MIR166r,gma-MIR166l,lja-MIR166,pvu-MIR166a,ptc-MIR166d,ptc-MIR166a,ptc-MIR166i,ptc-…	csi-MIR166c	ttcctcctcgatcatacatgaacggttgagGGGAATGTTGTCTGGTTCGAGatcactcgtggacgaattaattaataacttattgtcttttgaatgattTCGGACCAGGCTTCATTCCCCCcaactcagtttaattgc	csi-miR166c-5p	GGGAATGTTGTCTGGTTCGAG	5'	Diff	gp2a	...((((((.((((((((..(((((((((((((.(((((............(((((((.((....)).)))))))...))))).)))))))))))))..)))))))).))))))...	111	52.1	-64.1	1.1	17.5	14.5	17.5	12.5	12	0	0	3.5	45	23.5	6.5	10	5.5	18	27	9	14.5	13	8	5	4	19	23.5	17.5	12	3.5
28	31	mtr-miR166a_L+2R-2_1ss21CT	TCTCGGACCAGGCTTCATTCT	21	arahy.Tifrunner.gnm1.Arahy.15	-	19366270	19366386	aaggagttgaggGGAATGCTGTCTGGTTCGAGAccattccttccattatctgcatccgaacccatgtgcggatgctcagaatgaTCTCGGACCAGGCTTCATTCCccccagctcaaa	189	mtr-MIR166e,mtr-MIR166g,mtr-MIR166b,mtr-MIR166a,mtr-MIR166c,mtr-MIR166f,mtr-MIR166d,gma-MIR166t,gma-MIR166b,gma-MIR166a,gma-MIR166d,gma-MIR166c,gma-MIR166g,gma-MIR166e,gma-MIR166i,gma-MIR166p,gma-MIR166u,gma-MIR166s,gma-MIR166n,gma-MIR166j,gma-MIR166f,gma-MIR166k,gma-MIR166h,gma-MIR166o,gma-MIR166q,gma-MIR166m,gma-MIR166r,gma-MIR166l,lja-MIR166,pvu-MIR166a,ptc-MIR166d,ptc-MIR166a,ptc-MIR166i,ptc-…	mtr-MIR166a	cagacatacgaaggagttcaggggaatggtgtctgattcgagaccattcgtcacaagtaaacagtagccttgagaatgatcTCGGACCAGGCTTCATTCCCCctagctcatagtatcatgc	mtr-miR166a	TCGGACCAGGCTTCATTCCCC	3'	Diff	gp2a	...((((((.((((((((..(((((((((((((.(((((............(((((((.((....)).)))))))...))))).)))))))))))))..)))))))).))))))...	111	52.1	-64.1	1.1	4241	1803	2709	3175	2045	358	229	554	4204	1187	1455	1459	1404	2074	2765.5	2603	3331	2319.5	1627	1700	2192	3938	4617	3913	2260	2437
29	32	gma-miR166i-5p_R+1	GGAATGTCGTCTGGTTCGAGA	21	arahy.Tifrunner.gnm1.Arahy.09	+	95038051	95038165	ttcgagttgaggGGAATGTCGTCTGGTTCGAGAccattcttttgatgaagcataggtcactacgcactcgaaaaaagaatgaTTTCGGACCAGGCTTCATTCCccctaactcaaa	114	mtr-MIR166a,mtr-MIR166e,mtr-MIR166g,gma-MIR166d,gma-MIR166f,gma-MIR166b,gma-MIR166a,gma-MIR166n,gma-MIR166c,gma-MIR166g,gma-MIR166e,gma-MIR166i,gma-MIR166p,gma-MIR166o,gma-MIR166q,gma-MIR166m,gma-MIR166l,gma-MIR166u,lja-MIR166,pvu-MIR166a,ptc-MIR166d,ptc-MIR166a,ptc-MIR166f,ptc-MIR166b,ptc-MIR166h,ptc-MIR166j,ptc-MIR166k,ptc-MIR166g,ptc-MIR166e,ptc-MIR166c,ptc-MIR166m,ptc-MIR166q,ath-MIR166c,ath-…	gma-MIR166i	gttgaggGGAATGTCGTCTGGTTCGAGaccattcatgcaagtagtctcagacatgactcttctgagtgattTCGGACCAGGCTTCATTCCCCtcagc	gma-miR166i-5p	GGAATGTCGTCTGGTTCGAG	5'	Diff	gp2a	...(((((..((((((((..(((((((((((((.(((((((((..(((.((.(((....))).))..)))..))))))))).)))))))))))))..))))))))..)))))...	109	45.2	-59.9	1.2	10	6	0	2.5	0	0	0	0	0	0	0	0	0	0	3	3.5	0	15	0	0	0	3	23	0	0	0
29	33	mtr-miR166a_L+2R-2_2	TTTCGGACCAGGCTTCATTCC	21	arahy.Tifrunner.gnm1.Arahy.09	+	95038051	95038165	ttcgagttgaggGGAATGTCGTCTGGTTCGAGAccattcttttgatgaagcataggtcactacgcactcgaaaaaagaatgaTTTCGGACCAGGCTTCATTCCccctaactcaaa	114	mtr-MIR166a,mtr-MIR166e,mtr-MIR166g,gma-MIR166d,gma-MIR166f,gma-MIR166b,gma-MIR166a,gma-MIR166n,gma-MIR166c,gma-MIR166g,gma-MIR166e,gma-MIR166i,gma-MIR166p,gma-MIR166o,gma-MIR166q,gma-MIR166m,gma-MIR166l,gma-MIR166u,lja-MIR166,pvu-MIR166a,ptc-MIR166d,ptc-MIR166a,ptc-MIR166f,ptc-MIR166b,ptc-MIR166h,ptc-MIR166j,ptc-MIR166k,ptc-MIR166g,ptc-MIR166e,ptc-MIR166c,ptc-MIR166m,ptc-MIR166q,ath-MIR166c,ath-…	mtr-MIR166g	tttgaggGGAATGTTGTCTGGCTCGAGGacgctttcttctcgatctaatgcaaatttgtggtcatggattgtaaagtattcTCGGACCAGGCTTCATTCCCCccaat	mtr-miR166a	TCGGACCAGGCTTCATTCCCC	3'	Diff	gp2a	...(((((..((((((((..(((((((((((((.(((((((((..(((.((.(((....))).))..)))..))))))))).)))))))))))))..))))))))..)))))...	109	45.2	-59.9	1.2	3022.5	1701.5	2797.5	3841	2289	286.5	229	598	3534	1766.5	1233.5	979	1087	2189	2383.5	1298.5	3158.5	1508	820	837	921.5	2458.5	2729	2096.5	946	1224.5
30	32	gma-miR166i-5p_R+1	GGAATGTCGTCTGGTTCGAGA	21	arahy.Tifrunner.gnm1.Arahy.19	+	124871778	124871891	ttctgagttgaggGGAATGTCGTCTGGTTCGAGAccattcttttgatgaagcataggtcactacgtactcgaaagaatgaTTTCGGACCAGGCTTCATTCCccctaactcaaaa	145	mtr-MIR166e,mtr-MIR166g,mtr-MIR166a,gma-MIR166c,gma-MIR166g,gma-MIR166e,gma-MIR166i,gma-MIR166p,gma-MIR166t,gma-MIR166b,gma-MIR166a,gma-MIR166d,gma-MIR166u,gma-MIR166s,gma-MIR166n,gma-MIR166m,gma-MIR166f,gma-MIR166o,gma-MIR166q,lja-MIR166,pvu-MIR166a,ptc-MIR166d,ptc-MIR166f,ptc-MIR166b,ptc-MIR166e,ptc-MIR166a,ptc-MIR166i,ptc-MIR166l,ptc-MIR166h,ptc-MIR166m,ptc-MIR166j,ptc-MIR166k,ptc-MIR166g,ptc-…	gma-MIR166i	gttgaggGGAATGTCGTCTGGTTCGAGaccattcatgcaagtagtctcagacatgactcttctgagtgattTCGGACCAGGCTTCATTCCCCtcagc	gma-miR166i-5p	GGAATGTCGTCTGGTTCGAG	5'	Diff	gp2a	...((((((..((((((((..(((((((((((((.(((((((((((....((.(((....))).))..))))))))))).)))))))))))))..))))))))..))))))...	108	44.7	-60.6	1.2	10	6	0	2.5	0	0	0	0	0	0	0	0	0	0	3	3.5	0	15	0	0	0	3	23	0	0	0
30	33	mtr-miR166a_L+2R-2_2	TTTCGGACCAGGCTTCATTCC	21	arahy.Tifrunner.gnm1.Arahy.19	+	124871778	124871891	ttctgagttgaggGGAATGTCGTCTGGTTCGAGAccattcttttgatgaagcataggtcactacgtactcgaaagaatgaTTTCGGACCAGGCTTCATTCCccctaactcaaaa	145	mtr-MIR166e,mtr-MIR166g,mtr-MIR166a,gma-MIR166c,gma-MIR166g,gma-MIR166e,gma-MIR166i,gma-MIR166p,gma-MIR166t,gma-MIR166b,gma-MIR166a,gma-MIR166d,gma-MIR166u,gma-MIR166s,gma-MIR166n,gma-MIR166m,gma-MIR166f,gma-MIR166o,gma-MIR166q,lja-MIR166,pvu-MIR166a,ptc-MIR166d,ptc-MIR166f,ptc-MIR166b,ptc-MIR166e,ptc-MIR166a,ptc-MIR166i,ptc-MIR166l,ptc-MIR166h,ptc-MIR166m,ptc-MIR166j,ptc-MIR166k,ptc-MIR166g,ptc-…	mtr-MIR166a	cagacatacgaaggagttcaggggaatggtgtctgattcgagaccattcgtcacaagtaaacagtagccttgagaatgatcTCGGACCAGGCTTCATTCCCCctagctcatagtatcatgc	mtr-miR166a	TCGGACCAGGCTTCATTCCCC	3'	Diff	gp2a	...((((((..((((((((..(((((((((((((.(((((((((((....((.(((....))).))..))))))))))).)))))))))))))..))))))))..))))))...	108	44.7	-60.6	1.2	3022.5	1701.5	2797.5	3841	2289	286.5	229	598	3534	1766.5	1233.5	979	1087	2189	2383.5	1298.5	3158.5	1508	820	837	921.5	2458.5	2729	2096.5	946	1224.5
31	34	mtr-miR166e-5p	GGAATGTTGGCTGGCTCGAGG	21	arahy.Tifrunner.gnm1.Arahy.13	+	121515231	121515386	ataaagaagcaaagagtgggttagggtttagagaggatgagttggtggttgaggGGAATGTTGGCTGGCTCGAGGcttcaatttggtttgggcTTCGGACCAGGCTTCATTCCtctcaaactaactaaactccatcattatattcttcttcttctt	146	mtr-MIR166e,mtr-MIR166g,mtr-MIR166b,mtr-MIR166a,mtr-MIR166c,mtr-MIR166f,gma-MIR166e,gma-MIR166t,gma-MIR166b,gma-MIR166a,gma-MIR166d,gma-MIR166c,gma-MIR166r,gma-MIR166l,gma-MIR166u,gma-MIR166s,gma-MIR166n,gma-MIR166m,gma-MIR166j,gma-MIR166f,gma-MIR166k,gma-MIR166h,gma-MIR166o,gma-MIR166q,lja-MIR166,pvu-MIR166a,ptc-MIR166d,ptc-MIR166f,ptc-MIR166b,ptc-MIR166e,ptc-MIR166a,ptc-MIR166i,ptc-MIR166l,ptc-…	mtr-MIR166e	tttgaggGGAATGTTGGCTGGCTCGAGGcttttcagtttcacaaaggaagttcagtcttaattgtatgaactataaggctTCGGACCAGGCTTCATTCCCCtcaaa	mtr-miR166e-5p	GGAATGTTGGCTGGCTCGAGG	5'	Yes	gp2a	...((((((..(((((((......(((.....(((....(((((((..((((((((((((..((((((..(((((((.(((......))))))))))..))).))).)))))))))))))))))))...))).)))....)))))))))))))...	150	43.6	-58.9	0.9	652	228	548.5	763.5	390.5	21.5	22	78.5	1120.5	206	91.5	160.5	138	405	609.5	299	414.5	421	200.5	181.5	266	397	625.5	362	337.5	190
31	35	mtr-miR166a_L+1R-2	CTCGGACCAGGCTTCATTCC	20	arahy.Tifrunner.gnm1.Arahy.13	+	121515231	121515386	ataaagaagcaaagagtgggttagggtttagagaggatgagttggtggttgaggGGAATGTTGGCTGGCTCGAGGcttcaatttggtttgggcTTCGGACCAGGCTTCATTCCtctcaaactaactaaactccatcattatattcttcttcttctt	146	mtr-MIR166e,mtr-MIR166g,mtr-MIR166b,mtr-MIR166a,mtr-MIR166c,mtr-MIR166f,gma-MIR166e,gma-MIR166t,gma-MIR166b,gma-MIR166a,gma-MIR166d,gma-MIR166c,gma-MIR166r,gma-MIR166l,gma-MIR166u,gma-MIR166s,gma-MIR166n,gma-MIR166m,gma-MIR166j,gma-MIR166f,gma-MIR166k,gma-MIR166h,gma-MIR166o,gma-MIR166q,lja-MIR166,pvu-MIR166a,ptc-MIR166d,ptc-MIR166f,ptc-MIR166b,ptc-MIR166e,ptc-MIR166a,ptc-MIR166i,ptc-MIR166l,ptc-…	mtr-MIR166a	cagacatacgaaggagttcaggggaatggtgtctgattcgagaccattcgtcacaagtaaacagtagccttgagaatgatcTCGGACCAGGCTTCATTCCCCctagctcatagtatcatgc	mtr-miR166a	TCGGACCAGGCTTCATTCCCC	3'	Diff	gp2a	...((((((..(((((((......(((.....(((....(((((((..((((((((((((..((((((..(((((((.(((......))))))))))..))).))).)))))))))))))))))))...))).)))....)))))))))))))...	150	43.6	-58.9	0.9	528	251	368	393.5	230.5	55	46.5	68.5	566	210	175.5	201.5	169.5	300.5	346.5	238.5	379.5	255.5	102.5	106	127	423	335	464	200.5	220.5
32	36	mtr-miR166a	TCGGACCAGGCTTCATTCCCC	21	arahy.Tifrunner.gnm1.Arahy.05	+	103223387	103223522	aatgaatgtgagggattgatggtgtggggaatgccgcctgactcgagatgtctaactactcatgtgatgagtttttgtgacaatttcTCGGACCAGGCTTCATTCCCCtcactacgtcttctcttgcctcttcttt	171	mtr-MIR166e,mtr-MIR166g,mtr-MIR166a,mtr-MIR166b,mtr-MIR166c,mtr-MIR166f,gma-MIR166t,gma-MIR166b,gma-MIR166a,gma-MIR166d,gma-MIR166c,gma-MIR166g,gma-MIR166e,gma-MIR166i,gma-MIR166p,gma-MIR166u,gma-MIR166s,gma-MIR166n,gma-MIR166f,gma-MIR166o,gma-MIR166q,gma-MIR166r,gma-MIR166j,gma-MIR166h,gma-MIR166m,gma-MIR166k,lja-MIR166,pvu-MIR166a,ptc-MIR166d,ptc-MIR166a,ptc-MIR166i,ptc-MIR166f,ptc-MIR166l,ptc-…	mtr-MIR166a	cagacatacgaaggagttcaggggaatggtgtctgattcgagaccattcgtcacaagtaaacagtagccttgagaatgatcTCGGACCAGGCTTCATTCCCCctagctcatagtatcatgc	mtr-miR166a	TCGGACCAGGCTTCATTCCCC	3'	Yes	gp2a	...(((.(..(((((..(((((((.((((((((..(((((..(((((((((((((..((((((...))))))..))).))))...))))))..)))))..)))))))).)))..)))).)))))..)...)))...	130	46.3	-58.1	0.9	225887	94510	195528	244958	146470	18292	13752	38906	266317	75859	78659	98203	95542	101779	176731	99145	166874	127188	65449	61154	66565	134949	171406	181610	93732	97330
33	37	gma-miR167a_R+1_1ss9CT	TGAAGCTGTCAGCATGATCTAT	22	arahy.Tifrunner.gnm1.Arahy.06	+	16769995	16770152	gatgtccacaaaggaagaagTGAAGCTGTCAGCATGATCTACcttgcttaattaattaattgctttaatttgtttagctaatataattaattaagtggtaattaataagccactaGATCATGCTGTGACAGCCTCACTctttcctatttggggactta	9	gma-MIR167a,ptc-MIR167b,ptc-MIR167d,ath-MIR167b,aly-MIR167b,csi-MIR167e,cas-MIR167b,ghr-MIR167a,dpr-MIR167b,	gma-MIR167a	gaagttcgcaaaggaaaaagTGAAGCTGCCAGCATGATCTAcctttggttagagagctcaagagtgctaaccctgactaggtcatgctgtgacagcctcactccttcctatttggggac	gma-miR167a	TGAAGCTGCCAGCATGATCTA	5'	Diff	gp2a	...((((.((((((((..(((((.(((((((((((((((((....(((((((((((((((((((...........))).))).)))))))))))))(((.........)))..)))))))))))..)))))).)))))..)))))..))).))))...	152	34.2	-61.6	1.1	0	0	0	0	0	0	0	0	0	0	0	0	0	0	0	0	11	0	0	0	0	0	0	0	0	0
33	38	aly-miR167b-3p_2ss2GA10CG	GATCATGCTGTGACAGCCTCACT	23	arahy.Tifrunner.gnm1.Arahy.06	+	16769995	16770152	gatgtccacaaaggaagaagTGAAGCTGTCAGCATGATCTACcttgcttaattaattaattgctttaatttgtttagctaatataattaattaagtggtaattaataagccactaGATCATGCTGTGACAGCCTCACTctttcctatttggggactta	9	gma-MIR167a,ptc-MIR167b,ptc-MIR167d,ath-MIR167b,aly-MIR167b,csi-MIR167e,cas-MIR167b,ghr-MIR167a,dpr-MIR167b,	aly-MIR167b	atctgcacaacttgttgctcaggtattttgaagacaagtccacaagggaacaagTGAAGCTGCCAGCATGATCTAtctttggttaagagatgaatgtgtaaacatattgcttaaacccaagctaGGTCATGCTCTGACAGCCTCACTccttcctggtttaggaccattcactgataaagcattccacatgccgat	aly-miR167b-3p	GGTCATGCTCTGACAGCCTCACT	3'	Diff	gp2a	...((((.((((((((..(((((.(((((((((((((((((....(((((((((((((((((((...........))).))).)))))))))))))(((.........)))..)))))))))))..)))))).)))))..)))))..))).))))...	152	34.2	-61.6	1.1	90	68	110	142	60	29	15	38	140	69	75	85	80	53	80	38	123	37	47	32	41	60	81	116	27	42
34	39	mtr-miR167b-5p_R+1_1ss2GA	TAAAGCTGCCAGCATGATCTGA	22	arahy.Tifrunner.gnm1.Arahy.06	-	3867253	3867362	cctgcaacagtTAAAGCTGCCAGCATGATCTGAacttattaccttccttcttccttatatttgtgtgtggtggcaagatcaGATCATGTGGGAGCTTCATCtgttgcaat	59	mtr-MIR167b,gma-MIR167g,gma-MIR167j,gma-MIR167c,lja-MIR167,gso-MIR167a,ptc-MIR167e,ptc-MIR167c,ptc-MIR167h,ath-MIR167d,ath-MIR167c,mdm-MIR167c,mdm-MIR167d,mdm-MIR167g,gra-MIR167a,gra-MIR167c,gra-MIR167b,aly-MIR167d,aly-MIR167c,ppe-MIR167c,ppe-MIR167b,mes-MIR167d,mes-MIR167f,mes-MIR167e,mes-MIR167b,mes-MIR167g,mes-MIR167a,vvi-MIR167a,vvi-MIR167c,nta-MIR167a,nta-MIR167c,nta-MIR167b,nta-MIR167d,csi-…	mtr-MIR167b	caatgacagtTGAAGCTGCCAGCATGATCTGtgctttccttcctgtgtatatactttaatttccagctgaatttaaatataaccaaaaaaataaatatgtttggtctaaattttgatcaaacttatatatatttttgcttatgtttaagtctggggtgagtttatttgtggtaagaacaGATCATGTTGGAGCTTCACCtgttaaat	mtr-miR167b-5p	TGAAGCTGCCAGCATGATCTG	5'	Diff	gp2a	..((((((((...(((((.(((.((((((((((.(((..((((.........................))))..))).))))))))))))).)))))...))))))))..	106	42.7	-46.1	1	4219	4753	4642.5	6999.5	3854	726.5	604.5	1136.5	8822	3717.5	3036.5	2961.5	1888	4265.5	7052	3151	5045.5	2513.5	1415.5	1641.5	1677	5681.5	4815	5764.5	2299	2517
34	40	ppe-MIR167c-p3_1ss11TG	GATCATGTGGGAGCTTCATC	20	arahy.Tifrunner.gnm1.Arahy.06	-	3867253	3867362	cctgcaacagtTAAAGCTGCCAGCATGATCTGAacttattaccttccttcttccttatatttgtgtgtggtggcaagatcaGATCATGTGGGAGCTTCATCtgttgcaat	59	mtr-MIR167b,gma-MIR167g,gma-MIR167j,gma-MIR167c,lja-MIR167,gso-MIR167a,ptc-MIR167e,ptc-MIR167c,ptc-MIR167h,ath-MIR167d,ath-MIR167c,mdm-MIR167c,mdm-MIR167d,mdm-MIR167g,gra-MIR167a,gra-MIR167c,gra-MIR167b,aly-MIR167d,aly-MIR167c,ppe-MIR167c,ppe-MIR167b,mes-MIR167d,mes-MIR167f,mes-MIR167e,mes-MIR167b,mes-MIR167g,mes-MIR167a,vvi-MIR167a,vvi-MIR167c,nta-MIR167a,nta-MIR167c,nta-MIR167b,nta-MIR167d,csi-…	ppe-MIR167c	gtcgtcgtgcacttccaactgtTGAAGCTGCCAGCATGATCTGAgctttcttttttataagaaaggctagatcatgtggtagcttcatctgttgactggagcatggtagac	ppe-MIR167c-p3	gatcatgtggtagcttcatc	3'	New	gp2a	..((((((((...(((((.(((.((((((((((.(((..((((.........................))))..))).))))))))))))).)))))...))))))))..	106	42.7	-46.1	1	328	295	277.5	692.5	335.5	69.5	32.5	98.5	742.5	269.5	158	264.5	69.5	278	540.5	317	452.5	322.5	150.5	97	184	315	480.5	267.5	187.5	137
35	39	mtr-miR167b-5p_R+1_1ss2GA	TAAAGCTGCCAGCATGATCTGA	22	arahy.Tifrunner.gnm1.Arahy.16	+	19350959	19351070	acctgcaacagtTAAAGCTGCCAGCATGATCTGAacttattaccttccttcttccttatatttgtgtgtggtggcaagatcaGATCATGTGGGAGCTTCATCtgttgcaatg	43	mtr-MIR167b,gma-MIR167g,gma-MIR167j,lja-MIR167,gso-MIR167a,ptc-MIR167e,ptc-MIR167c,ptc-MIR167h,ath-MIR167d,mdm-MIR167c,mdm-MIR167d,mdm-MIR167g,gra-MIR167c,aly-MIR167d,ppe-MIR167c,ppe-MIR167b,mes-MIR167e,mes-MIR167f,mes-MIR167d,mes-MIR167b,mes-MIR167g,vvi-MIR167c,nta-MIR167d,csi-MIR167a,csi-MIR167d,lus-MIR167i,lus-MIR167b,lus-MIR167a,cme-MIR167f,cme-MIR167d,fve-MIR167d,sly-MIR167b,bna-MIR167d,cpa-…	mtr-MIR167b	caatgacagtTGAAGCTGCCAGCATGATCTGtgctttccttcctgtgtatatactttaatttccagctgaatttaaatataaccaaaaaaataaatatgtttggtctaaattttgatcaaacttatatatatttttgcttatgtttaagtctggggtgagtttatttgtggtaagaacaGATCATGTTGGAGCTTCACCtgttaaat	mtr-miR167b-5p	TGAAGCTGCCAGCATGATCTG	5'	Diff	gp2a	...((((((((...(((((.(((.((((((((((.(((..((((.........................))))..))).))))))))))))).)))))...))))))))...	106	42.9	-46.1	1	4219	4753	4642.5	6999.5	3854	726.5	604.5	1136.5	8822	3717.5	3036.5	2961.5	1888	4265.5	7052	3151	5045.5	2513.5	1415.5	1641.5	1677	5681.5	4815	5764.5	2299	2517
35	40	ppe-MIR167c-p3_1ss11TG	GATCATGTGGGAGCTTCATC	20	arahy.Tifrunner.gnm1.Arahy.16	+	19350959	19351070	acctgcaacagtTAAAGCTGCCAGCATGATCTGAacttattaccttccttcttccttatatttgtgtgtggtggcaagatcaGATCATGTGGGAGCTTCATCtgttgcaatg	43	mtr-MIR167b,gma-MIR167g,gma-MIR167j,lja-MIR167,gso-MIR167a,ptc-MIR167e,ptc-MIR167c,ptc-MIR167h,ath-MIR167d,mdm-MIR167c,mdm-MIR167d,mdm-MIR167g,gra-MIR167c,aly-MIR167d,ppe-MIR167c,ppe-MIR167b,mes-MIR167e,mes-MIR167f,mes-MIR167d,mes-MIR167b,mes-MIR167g,vvi-MIR167c,nta-MIR167d,csi-MIR167a,csi-MIR167d,lus-MIR167i,lus-MIR167b,lus-MIR167a,cme-MIR167f,cme-MIR167d,fve-MIR167d,sly-MIR167b,bna-MIR167d,cpa-…	ppe-MIR167c	gtcgtcgtgcacttccaactgtTGAAGCTGCCAGCATGATCTGAgctttcttttttataagaaaggctagatcatgtggtagcttcatctgttgactggagcatggtagac	ppe-MIR167c-p3	gatcatgtggtagcttcatc	3'	New	gp2a	...((((((((...(((((.(((.((((((((((.(((..((((.........................))))..))).))))))))))))).)))))...))))))))...	106	42.9	-46.1	1	328	295	277.5	692.5	335.5	69.5	32.5	98.5	742.5	269.5	158	264.5	69.5	278	540.5	317	452.5	322.5	150.5	97	184	315	480.5	267.5	187.5	137
36	41	gma-miR167c_R+1	TGAAGCTGCCAGCATGATCTGA	22	arahy.Tifrunner.gnm1.Arahy.09	-	110335526	110335645	tgatcatgcaccactacaagtTGAAGCTGCCAGCATGATCTTAactttccctctcctatgatttgttggggtgagatcagatcatgtggcagtttcacctagttgttggaagcatgaatt	23	gma-MIR167g,gma-MIR167j,lja-MIR167,gso-MIR167a,ptc-MIR167e,mdm-MIR167j,mdm-MIR167a,mdm-MIR167h,mdm-MIR167i,ppe-MIR167c,mes-MIR167d,mes-MIR167f,mes-MIR167e,vvi-MIR167c,csi-MIR167a,lus-MIR167a,cme-MIR167f,cme-MIR167d,fve-MIR167d,cpa-MIR167d,eun-MIR167a,dpr-MIR167c,ctr-MIR167,	gma-MIR167g	cagcagtTGAAGCTGCCAGCATGATCTGagtttaccttctattggtaagaacagatcatgtggctgcttcacctgttg	gma-miR167c	TGAAGCTGCCAGCATGATCTG	5'	Diff	gp2a	...((((((.((((.((.((.(((((((((((.((((((((....((((((((..............)))).))))..))))))))))))))))))).)).)).)).))..))))))...	114	43.3	-48.5	0.9	28.5	20	15.5	26.5	14	0	5	0	27.5	25	25	8	10	14	18	23	24	15	22	23	32	43	79	25	19	32
37	42	mdm-miR167h_R+1	TGAAGCTGCCAGCATGATCTTAT	23	arahy.Tifrunner.gnm1.Arahy.19	+	157637785	157637904	tgatcatgcaccactacaagtTGAAGCTGCCAGCATGATCTTAActttccctctcctatgatttgttggggtgagatcagatcatgtggcagtttcacctagttgttggaagcatgaatt	4	mdm-MIR167j,mdm-MIR167a,mdm-MIR167h,mdm-MIR167i,	mdm-MIR167a	tcatgcactggtagcggtTGAAGCTGCCAGCATGATCTTAtaactcccwacttcgtttagggaagatcAGATCATCTGGCAGTTTCACCtgttactggtagcatga	mdm-miR167h	TGAAGCTGCCAGCATGATCTTA	5'	Diff	gp2a	...((((((.((((.((.((.(((((((((((.((((((((....((((((((..............)))).))))..))))))))))))))))))).)).)).)).))..))))))...	114	43.3	-48.5	0.9	2.5	0	2.5	2.5	0	0	0	0	2.5	0	0	0	0	0	0	0	0	0	0	0	0	0	0	0	0	0
38	43	mtr-miR168b_1ss21AC	TCGCTTGGTGCAGGTCGGGAC	21	arahy.Tifrunner.gnm1.Arahy.05	-	2723777	2723914	ctttctctcactgcgcggtctctaatTCGCTTGGTGCAGGTCGGGAAccgatcttcccgcgcgtaatggatgccgttggcggcggcgaatttggatCCCGCCTTGCATCAACTGAATCggaggccacggtgaagattc	17	mtr-MIR168b,mtr-MIR168c,ath-MIR168a,aly-MIR168a,vvi-MIR168,nta-MIR168d,nta-MIR168a,nta-MIR168b,nta-MIR168c,sly-MIR168b,sly-MIR168a,bra-MIR168a,bna-MIR168a,bra-MIR168b,bra-MIR168c,bna-MIR168b,cas-MIR168,	mtr-MIR168c	ctcacttcgcggtctctaatTCGCTTGGTGCAGGTCGGGAAccactacatccgctgttttcgtagaaaccggcggtgaattggatCCCGCCTTGCATCAACTGAATcggaggccgcggtgaatcta	mtr-miR168b	TCGCTTGGTGCAGGTCGGGAA	5'	Diff	gp2a	...(((.((((((...((((((..((((..((((((((((.(((((.((((..(((((((.((((((((...))))).))))))).))).)))).))))).))))))))))..))))..)))))).)))))))))...	132	58	-68.9	0.9	36	26.5	29	127	20.5	20	0	26.5	40.5	15	8	13	17	15.5	22.5	44.5	36	24.5	7.5	11	29.5	29.5	24.5	24.5	21.5	14.5
38	44	mtr-miR168c-3p_R+1	CCCGCCTTGCATCAACTGAATT	22	arahy.Tifrunner.gnm1.Arahy.05	-	2723777	2723914	ctttctctcactgcgcggtctctaatTCGCTTGGTGCAGGTCGGGAAccgatcttcccgcgcgtaatggatgccgttggcggcggcgaatttggatCCCGCCTTGCATCAACTGAATCggaggccacggtgaagattc	17	mtr-MIR168b,mtr-MIR168c,ath-MIR168a,aly-MIR168a,vvi-MIR168,nta-MIR168d,nta-MIR168a,nta-MIR168b,nta-MIR168c,sly-MIR168b,sly-MIR168a,bra-MIR168a,bna-MIR168a,bra-MIR168b,bra-MIR168c,bna-MIR168b,cas-MIR168,	mtr-MIR168c	ctcacttcgcggtctctaatTCGCTTGGTGCAGGTCGGGAAccactacatccgctgttttcgtagaaaccggcggtgaattggatCCCGCCTTGCATCAACTGAATcggaggccgcggtgaatcta	mtr-miR168c-3p	CCCGCCTTGCATCAACTGAAT	3'	Diff	gp2a	...(((.((((((...((((((..((((..((((((((((.(((((.((((..(((((((.((((((((...))))).))))))).))).)))).))))).))))))))))..))))..)))))).)))))))))...	132	58	-68.9	0.9	65	43.5	42	37	26.5	9	4.5	12	91	37	27.5	32	45	27.5	62	31.5	52	36	26	20	21	62	56	76	48	52
39	43	mtr-miR168b_1ss21AC	TCGCTTGGTGCAGGTCGGGAC	21	arahy.Tifrunner.gnm1.Arahy.15	-	2723777	2723914	ctttctctcactgcgcggtctctaatTCGCTTGGTGCAGGTCGGGAAccgatcttcccgcgcgtaatggatgccgttggcggcggcgaatttggatCCCGCCTTGCATCAACTGAATCggaggccacggtgaagattc	17	mtr-MIR168c,mtr-MIR168b,ath-MIR168a,aly-MIR168a,vvi-MIR168,nta-MIR168d,nta-MIR168a,nta-MIR168b,nta-MIR168c,sly-MIR168b,sly-MIR168a,bra-MIR168a,bna-MIR168a,bra-MIR168b,bra-MIR168c,bna-MIR168b,cas-MIR168,	mtr-MIR168b	aacctctgatTCGCTTGGTGCAGGTCGGGAAccattacatccacagtttccctcggtaaattggatcctgccttgcatcaatcgaatcggaggctgca	mtr-miR168b	TCGCTTGGTGCAGGTCGGGAA	5'	Diff	gp2a	...(((.((((((...((((((..((((..((((((((((.(((((.((((..(((((((.((((((((...))))).))))))).))).)))).))))).))))))))))..))))..)))))).)))))))))...	132	58	-68.9	0.9	36	26.5	29	127	20.5	20	0	26.5	40.5	15	8	13	17	15.5	22.5	44.5	36	24.5	7.5	11	29.5	29.5	24.5	24.5	21.5	14.5
39	44	mtr-miR168c-3p_R+1	CCCGCCTTGCATCAACTGAATT	22	arahy.Tifrunner.gnm1.Arahy.15	-	2723777	2723914	ctttctctcactgcgcggtctctaatTCGCTTGGTGCAGGTCGGGAAccgatcttcccgcgcgtaatggatgccgttggcggcggcgaatttggatCCCGCCTTGCATCAACTGAATCggaggccacggtgaagattc	17	mtr-MIR168c,mtr-MIR168b,ath-MIR168a,aly-MIR168a,vvi-MIR168,nta-MIR168d,nta-MIR168a,nta-MIR168b,nta-MIR168c,sly-MIR168b,sly-MIR168a,bra-MIR168a,bna-MIR168a,bra-MIR168b,bra-MIR168c,bna-MIR168b,cas-MIR168,	mtr-MIR168c	ctcacttcgcggtctctaatTCGCTTGGTGCAGGTCGGGAAccactacatccgctgttttcgtagaaaccggcggtgaattggatCCCGCCTTGCATCAACTGAATcggaggccgcggtgaatcta	mtr-miR168c-3p	CCCGCCTTGCATCAACTGAAT	3'	Diff	gp2a	...(((.((((((...((((((..((((..((((((((((.(((((.((((..(((((((.((((((((...))))).))))))).))).)))).))))).))))))))))..))))..)))))).)))))))))...	132	58	-68.9	0.9	65	43.5	42	37	26.5	9	4.5	12	91	37	27.5	32	45	27.5	62	31.5	52	36	26	20	21	62	56	76	48	52
40	45	mtr-miR169d-5p_1ss9GT	AAGCCAAGTATGACTTGCCGG	21	arahy.Tifrunner.gnm1.Arahy.04	+	30666108	30666276	attggtctaagggtctctcatgaagtggttgaaagtgaaattAAGCCAAGGATGACTTGCCGGcaatcacttgctactaagtgaaattaactttgtttgatttagccGGCAGGTCATCCTGTGGCTATAtttgactttcttcttcttatgtgagattctaatgacctat	4	mtr-MIR169d,gma-MIR169s,gma-MIR169w,gma-MIR169c,	mtr-MIR169d	agatgAAGCCAAGGATGACTTGCCGGtataatagtaatttgccacaaatctagatagctattagctatgtttggatgggcggtgagattaacaaaattacagcagcattgtgattttgttgatgctttaaagtgtagtttttatcaaaattacagtggttcactgtaattatgagaatctcaccgtcaatctaaatatgcatttagtttcatttccGGCAGGTCATCCTTCGGCTATAtt	mtr-miR169d-5p	AAGCCAAGGATGACTTGCCGG	5'	Diff	gp2a	...((((..((..((((.((((.((..(..((((((.((((..(((((((((((((((((((((..(((((((....)))))))((((((......))))))..)))))))))))))))).)))))..)))).))))))..)..)))))).))))..))...))))...	163	39.1	-78.3	1.2	0	3	0	2.5	0	0	0	0	2.5	0	0	0	0	0	0	0	0	0	0	0	0	5	0	0	0	0
40	46	mtr-miR169d-3p_2ss14TG15CT	GGCAGGTCATCCTGTGGCTATA	22	arahy.Tifrunner.gnm1.Arahy.04	+	30666108	30666276	attggtctaagggtctctcatgaagtggttgaaagtgaaattAAGCCAAGGATGACTTGCCGGcaatcacttgctactaagtgaaattaactttgtttgatttagccGGCAGGTCATCCTGTGGCTATAtttgactttcttcttcttatgtgagattctaatgacctat	4	mtr-MIR169d,gma-MIR169s,gma-MIR169w,gma-MIR169c,	mtr-MIR169d	agatgAAGCCAAGGATGACTTGCCGGtataatagtaatttgccacaaatctagatagctattagctatgtttggatgggcggtgagattaacaaaattacagcagcattgtgattttgttgatgctttaaagtgtagtttttatcaaaattacagtggttcactgtaattatgagaatctcaccgtcaatctaaatatgcatttagtttcatttccGGCAGGTCATCCTTCGGCTATAtt	mtr-miR169d-3p	GGCAGGTCATCCTTCGGCTATA	3'	Diff	gp2a	...((((..((..((((.((((.((..(..((((((.((((..(((((((((((((((((((((..(((((((....)))))))((((((......))))))..)))))))))))))))).)))))..)))).))))))..)..)))))).))))..))...))))...	163	39.1	-78.3	1.2	0	0	0	0	0	0	0	0	0	0	0	0	0	0	0	0	0	0	0	0	0	0	2.5	0	0	0
41	47	mtr-miR169d-5p	AAGCCAAGGATGACTTGCCGG	21	arahy.Tifrunner.gnm1.Arahy.14	+	28661570	28661738	ttcggtctgagggtctttcatgaagtggttgaaagtgaaattAAGCCAAGGATGACTTGCCGGcaatcacttgctactaagcaaaattaattttgcttgatttagccGGCAGGTCATCTTGTGGCTATAtttgactttcttcttctcatgtgagactctaatgacctat	4	mtr-MIR169d,gma-MIR169s,gma-MIR169w,gma-MIR169c,	mtr-MIR169d	agatgAAGCCAAGGATGACTTGCCGGtataatagtaatttgccacaaatctagatagctattagctatgtttggatgggcggtgagattaacaaaattacagcagcattgtgattttgttgatgctttaaagtgtagtttttatcaaaattacagtggttcactgtaattatgagaatctcaccgtcaatctaaatatgcatttagtttcatttccGGCAGGTCATCCTTCGGCTATAtt	mtr-miR169d-5p	AAGCCAAGGATGACTTGCCGG	5'	Yes	gp2a	...((((..(((((((..((((.((..(..((((((.((((..((((((((((((((((((((((((((..........(((((((....))))))))))))..)))))))))))))))).)))))..)))).))))))..)..))))))..)))))))...))))...	163	40.2	-79.5	1.2	16	13	14	15.5	11	3	0	6	32.5	8.5	5.5	8.5	10	0	9.5	8	9.5	6.5	5.5	0	4.5	14.5	8.5	20.5	15	0
41	46	mtr-miR169d-3p_2ss14TG15CT	GGCAGGTCATCCTGTGGCTATA	22	arahy.Tifrunner.gnm1.Arahy.14	+	28661570	28661738	ttcggtctgagggtctttcatgaagtggttgaaagtgaaattAAGCCAAGGATGACTTGCCGGcaatcacttgctactaagcaaaattaattttgcttgatttagccGGCAGGTCATCTTGTGGCTATAtttgactttcttcttctcatgtgagactctaatgacctat	4	mtr-MIR169d,gma-MIR169s,gma-MIR169w,gma-MIR169c,	mtr-MIR169d	agatgAAGCCAAGGATGACTTGCCGGtataatagtaatttgccacaaatctagatagctattagctatgtttggatgggcggtgagattaacaaaattacagcagcattgtgattttgttgatgctttaaagtgtagtttttatcaaaattacagtggttcactgtaattatgagaatctcaccgtcaatctaaatatgcatttagtttcatttccGGCAGGTCATCCTTCGGCTATAtt	mtr-miR169d-3p	GGCAGGTCATCCTTCGGCTATA	3'	Diff	gp2a	...((((..(((((((..((((.((..(..((((((.((((..((((((((((((((((((((((((((..........(((((((....))))))))))))..)))))))))))))))).)))))..)))).))))))..)..))))))..)))))))...))))...	163	40.2	-79.5	1.2	0	0	0	0	0	0	0	0	0	0	0	0	0	0	0	0	0	0	0	0	0	0	2.5	0	0	0
42	48	mtr-miR169b_1ss9GT	CAGCCAAGTATGACTTGCCGG	21	arahy.Tifrunner.gnm1.Arahy.09	-	78131098	78131276	acacctaagggaaacttgcatgaagaggcagagtgtgtggtgCAGCCAAGGATGACTTGCCGGcattaaaacatgacatgactctgtttgagttcgtgttagtgttcgactatgaccGGCAAGTTGGCCTTGGCTATAttagactctcttcttctcatgtaagaaccaaacttaggctc	63	mtr-MIR169g,mtr-MIR169b,mtr-MIR169l,gma-MIR169f,gma-MIR169g,gma-MIR169v,gma-MIR169a,gma-MIR169m,gma-MIR169k,gma-MIR169l,vun-MIR169,ptc-MIR169h,ptc-MIR169g,ptc-MIR169f,ptc-MIR169e,ptc-MIR169d,ptc-MIR169p,ptc-MIR169s,ath-MIR169c,ath-MIR169b,mdm-MIR169a,mdm-MIR169g,mdm-MIR169h,mdm-MIR169j,mdm-MIR169i,aly-MIR169c,aly-MIR169b,ppe-MIR169c,ppe-MIR169b,ppe-MIR169a,mes-MIR169c,mes-MIR169e,mes-MIR169b,mes-…	mtr-MIR169l	gcagagagtgtagtaCAGCCAAGGATGACTTGCCGGccggcgttagtgaaggcaaaggcaaatgatcattcatgttcatgcatgcatattctccggccGGCAAGTTTTTCCTTGGCTATAttggactttcttc	mtr-miR169b	CAGCCAAGGATGACTTGCCGG	5'	Diff	gp2a	...((((((((...((((((((.(((((.((((.((.(..(..((((((((..(((((((((((((...(((((((((((((((.....))).)))))))).)))).....))).))))))))))..))))))))..)..).)).)))).)))))))))))))..))...))))))...	173	45.8	-84.2	1	0	0	0	0	0	0	2.5	0	0	2.5	0	0	0	0	0	0	0	0	0	0	0	0	0	0	0	0
42	49	mtr-miR169l-3p_3ss9TG10TG11T-	GGCAAGTTGGCCTTGGCTATA	21	arahy.Tifrunner.gnm1.Arahy.09	-	78131098	78131276	acacctaagggaaacttgcatgaagaggcagagtgtgtggtgCAGCCAAGGATGACTTGCCGGcattaaaacatgacatgactctgtttgagttcgtgttagtgttcgactatgaccGGCAAGTTGGCCTTGGCTATAttagactctcttcttctcatgtaagaaccaaacttaggctc	63	mtr-MIR169g,mtr-MIR169b,mtr-MIR169l,gma-MIR169f,gma-MIR169g,gma-MIR169v,gma-MIR169a,gma-MIR169m,gma-MIR169k,gma-MIR169l,vun-MIR169,ptc-MIR169h,ptc-MIR169g,ptc-MIR169f,ptc-MIR169e,ptc-MIR169d,ptc-MIR169p,ptc-MIR169s,ath-MIR169c,ath-MIR169b,mdm-MIR169a,mdm-MIR169g,mdm-MIR169h,mdm-MIR169j,mdm-MIR169i,aly-MIR169c,aly-MIR169b,ppe-MIR169c,ppe-MIR169b,ppe-MIR169a,mes-MIR169c,mes-MIR169e,mes-MIR169b,mes-…	mtr-MIR169l	gcagagagtgtagtaCAGCCAAGGATGACTTGCCGGccggcgttagtgaaggcaaaggcaaatgatcattcatgttcatgcatgcatattctccggccGGCAAGTTTTTCCTTGGCTATAttggactttcttc	mtr-miR169l-3p	GGCAAGTTTTTCCTTGGCTATA	3'	Diff	gp2a	...((((((((...((((((((.(((((.((((.((.(..(..((((((((..(((((((((((((...(((((((((((((((.....))).)))))))).)))).....))).))))))))))..))))))))..)..).)).)))).)))))))))))))..))...))))))...	173	45.8	-84.2	1	13.5	4.5	14.5	6.5	4	0	0	0	14.5	4.5	2.5	0	2.5	4.5	11.5	3.5	3	3	2.5	0	3	4	13	9	3	3.5
43	48	mtr-miR169b_1ss9GT	CAGCCAAGTATGACTTGCCGG	21	arahy.Tifrunner.gnm1.Arahy.19	-	103332250	103332430	cacgcctaagggaaacttgcatgaagaggcagagtgtgtgatgCAGCCAAGGATGACTTGCCGGcattaaaacatgacatgactctgtttgagttcgtgttcgtgttcgactatgaccGGCAAGTTGGCCTTGGCTATAttagactctcttcttctcatgtaagaaccaaacttaggctcg	63	mtr-MIR169g,mtr-MIR169b,mtr-MIR169l,gma-MIR169g,gma-MIR169v,gma-MIR169f,gma-MIR169a,gma-MIR169m,gma-MIR169k,gma-MIR169l,vun-MIR169,ptc-MIR169h,ptc-MIR169e,ptc-MIR169d,ptc-MIR169g,ptc-MIR169f,ptc-MIR169p,ptc-MIR169s,ath-MIR169b,ath-MIR169c,mdm-MIR169g,mdm-MIR169i,mdm-MIR169a,mdm-MIR169h,mdm-MIR169j,aly-MIR169c,aly-MIR169b,ppe-MIR169c,ppe-MIR169a,ppe-MIR169b,mes-MIR169c,mes-MIR169e,mes-MIR169b,mes-…	mtr-MIR169l	gcagagagtgtagtaCAGCCAAGGATGACTTGCCGGccggcgttagtgaaggcaaaggcaaatgatcattcatgttcatgcatgcatattctccggccGGCAAGTTTTTCCTTGGCTATAttggactttcttc	mtr-miR169b	CAGCCAAGGATGACTTGCCGG	5'	Diff	gp2a	...(((((((((...((((((((.(((((.((((.((.((((..((((((((..(((((((((((((...(((((((((((((((.....))).))))).))))))).....))).))))))))))..))))))))..)))).)).)))).)))))))))))))..))...)))))))...	175	47	-91.9	1.1	0	0	0	0	0	0	2.5	0	0	2.5	0	0	0	0	0	0	0	0	0	0	0	0	0	0	0	0
43	49	mtr-miR169l-3p_3ss9TG10TG11T-	GGCAAGTTGGCCTTGGCTATA	21	arahy.Tifrunner.gnm1.Arahy.19	-	103332250	103332430	cacgcctaagggaaacttgcatgaagaggcagagtgtgtgatgCAGCCAAGGATGACTTGCCGGcattaaaacatgacatgactctgtttgagttcgtgttcgtgttcgactatgaccGGCAAGTTGGCCTTGGCTATAttagactctcttcttctcatgtaagaaccaaacttaggctcg	63	mtr-MIR169g,mtr-MIR169b,mtr-MIR169l,gma-MIR169g,gma-MIR169v,gma-MIR169f,gma-MIR169a,gma-MIR169m,gma-MIR169k,gma-MIR169l,vun-MIR169,ptc-MIR169h,ptc-MIR169e,ptc-MIR169d,ptc-MIR169g,ptc-MIR169f,ptc-MIR169p,ptc-MIR169s,ath-MIR169b,ath-MIR169c,mdm-MIR169g,mdm-MIR169i,mdm-MIR169a,mdm-MIR169h,mdm-MIR169j,aly-MIR169c,aly-MIR169b,ppe-MIR169c,ppe-MIR169a,ppe-MIR169b,mes-MIR169c,mes-MIR169e,mes-MIR169b,mes-…	mtr-MIR169l	gcagagagtgtagtaCAGCCAAGGATGACTTGCCGGccggcgttagtgaaggcaaaggcaaatgatcattcatgttcatgcatgcatattctccggccGGCAAGTTTTTCCTTGGCTATAttggactttcttc	mtr-miR169l-3p	GGCAAGTTTTTCCTTGGCTATA	3'	Diff	gp2a	...(((((((((...((((((((.(((((.((((.((.((((..((((((((..(((((((((((((...(((((((((((((((.....))).))))).))))))).....))).))))))))))..))))))))..)))).)).)))).)))))))))))))..))...)))))))...	175	47	-91.9	1.1	13.5	4.5	14.5	6.5	4	0	0	0	14.5	4.5	2.5	0	2.5	4.5	11.5	3.5	3	3	2.5	0	3	4	13	9	3	3.5
44	47	mtr-miR169d-5p	AAGCCAAGGATGACTTGCCGG	21	arahy.Tifrunner.gnm1.Arahy.14	+	28652143	28652322	tccgatctaagggtctttcatgtagaggtcgaaagcgaaattAAGCCAAGGATGACTTGCCGGcaatgattatatttgctataggaaaggcaagcttcattatttgcgagattatgccGGCAAGTTGTTCTTTGGCTATGttttgctttctttttctcatgtaagactctaatgatctca	4	mtr-MIR169d,mtr-MIR169l,gma-MIR169s,gma-MIR169w,	mtr-MIR169d	agatgAAGCCAAGGATGACTTGCCGGtataatagtaatttgccacaaatctagatagctattagctatgtttggatgggcggtgagattaacaaaattacagcagcattgtgattttgttgatgctttaaagtgtagtttttatcaaaattacagtggttcactgtaattatgagaatctcaccgtcaatctaaatatgcatttagtttcatttccGGCAGGTCATCCTTCGGCTATAtt	mtr-miR169d-5p	AAGCCAAGGATGACTTGCCGG	5'	Yes	gp2a	...((((..((((((((.((((.((((...(((((((((((..(((((((((..(((((((((((.(((((....((((.((((..(((.....)))..))))..))))))))))))))))))))..).))))))))..)))))))))))...)))))))).))))))))...))))...	174	39.4	-79.2	1.1	16	13	14	15.5	11	3	0	6	32.5	8.5	5.5	8.5	10	0	9.5	8	9.5	6.5	5.5	0	4.5	14.5	8.5	20.5	15	0
44	50	mtr-miR169l-3p_2ss13CT22AG	GGCAAGTTTTTCTTTGGCTATG	22	arahy.Tifrunner.gnm1.Arahy.14	+	28652143	28652322	tccgatctaagggtctttcatgtagaggtcgaaagcgaaattAAGCCAAGGATGACTTGCCGGcaatgattatatttgctataggaaaggcaagcttcattatttgcgagattatgccGGCAAGTTGTTCTTTGGCTATGttttgctttctttttctcatgtaagactctaatgatctca	4	mtr-MIR169d,mtr-MIR169l,gma-MIR169s,gma-MIR169w,	mtr-MIR169l	gcagagagtgtagtaCAGCCAAGGATGACTTGCCGGccggcgttagtgaaggcaaaggcaaatgatcattcatgttcatgcatgcatattctccggccGGCAAGTTTTTCCTTGGCTATAttggactttcttc	mtr-miR169l-3p	GGCAAGTTTTTCCTTGGCTATA	3'	Diff	gp2a	...((((..((((((((.((((.((((...(((((((((((..(((((((((..(((((((((((.(((((....((((.((((..(((.....)))..))))..))))))))))))))))))))..).))))))))..)))))))))))...)))))))).))))))))...))))...	174	39.4	-79.2	1.1	0	0	0	0	0	0	0	0	5	6	0	0	0	6	0	0	0	0	0	0	0	7	0	0	0	0
45	51	gma-miR169e_L+3_1ss7CG	TTGAGCGAAGGATGACTTGCCGG	23	arahy.Tifrunner.gnm1.Arahy.01	-	95714900	95715011	tgcatgaagggatagagagagtgtacTTGAGCCAAGGATGACTTGCCGGcatcttcggttaaaagttgccggtgtctccttggctcatgttcgctccttttcctctcatata	18	gma-MIR169h,gma-MIR169e,gma-MIR169p,ptc-MIR169n,ath-MIR169f,ath-MIR169g,ath-MIR169e,ath-MIR169d,aly-MIR169g,aly-MIR169f,aly-MIR169e,aly-MIR169d,mes-MIR169h,vvi-MIR169p,vvi-MIR169o,vvi-MIR169l,cas-MIR169f,cas-MIR169d,	gma-MIR169e	gtcttgcatgaagaggtagagagagtgcttttgAGCCAAGGATGACTTGCCGGcgtaattacgggtattgccagcgagacatccttgttcacttatgctctcttttcactcatataagac	gma-miR169e	AGCCAAGGATGACTTGCCGG	5'	Diff	gp2a	...((((..(((.((((.(((((.((.(((((((((((.(((..(((((((.(((.......))).))))))))))))))))))))).)).))))))))))))..))))...	106	48.2	-58.4	1.1	0	0	3	0	0	0	0	0	3	0	0	0	2.5	0	0	0	0	0	0	0	0	0	0	3	0	0
46	51	gma-miR169e_L+3_1ss7CG	TTGAGCGAAGGATGACTTGCCGG	23	arahy.Tifrunner.gnm1.Arahy.04	+	30485331	30485504	tactcaaatgtcttgcatgaagaggcagagagagtacatgTTGAGCGAAGGATGACTTGCCGGcatcttctgcaaaattaataagcaggagtccactctttgttgttgggtggttgccggcgagacatccttgctcatatttgctctcttttctctcatatgagacttggatta	18	gma-MIR169h,gma-MIR169e,gma-MIR169p,ptc-MIR169n,ath-MIR169f,ath-MIR169g,ath-MIR169e,ath-MIR169d,aly-MIR169g,aly-MIR169f,aly-MIR169e,aly-MIR169d,mes-MIR169h,vvi-MIR169p,vvi-MIR169o,vvi-MIR169l,cas-MIR169f,cas-MIR169d,	gma-MIR169e	gtcttgcatgaagaggtagagagagtgcttttgAGCCAAGGATGACTTGCCGGcgtaattacgggtattgccagcgagacatccttgttcacttatgctctcttttcactcatataagac	gma-miR169e	AGCCAAGGATGACTTGCCGG	5'	Diff	gp2a	...((....(((((..(((.(((((.((((((((((.(((.(((((.(((((((.((((((((((.(((((((...........))))))).((((((.........)))))).)))))))))).))))))))))))))).))))))))))))))))))..)))))...))...	168	44.3	-83.5	1.1	0	0	3	0	0	0	0	0	3	0	0	0	2.5	0	0	0	0	0	0	0	0	0	0	3	0	0
47	52	mtr-miR169b	CAGCCAAGGATGACTTGCCGG	21	arahy.Tifrunner.gnm1.Arahy.04	+	123476330	123476498	tgatcatcttatgttttgcatgtgggaatgagtacatgtttgggCAGCCAAGGATGACTTGCCGGtaaagtttgtttgttcactcaatgtgcgctaactaattgaactggcaagtcgtctctggctacacaaaagcctctttctctcatgctacacattttgatgaaat	59	mtr-MIR169g,mtr-MIR169b,mtr-MIR169l,gma-MIR169f,gma-MIR169g,gma-MIR169v,gma-MIR169a,gma-MIR169m,vun-MIR169,ptc-MIR169h,ptc-MIR169g,ptc-MIR169f,ptc-MIR169e,ptc-MIR169d,ptc-MIR169p,ptc-MIR169s,ath-MIR169c,ath-MIR169b,mdm-MIR169a,mdm-MIR169g,mdm-MIR169h,mdm-MIR169j,mdm-MIR169i,aly-MIR169c,aly-MIR169b,ppe-MIR169c,ppe-MIR169b,ppe-MIR169a,mes-MIR169c,mes-MIR169e,mes-MIR169b,mes-MIR169d,mes-MIR169a,vvi-…	mtr-MIR169l	gcagagagtgtagtaCAGCCAAGGATGACTTGCCGGccggcgttagtgaaggcaaaggcaaatgatcattcatgttcatgcatgcatattctccggccGGCAAGTTTTTCCTTGGCTATAttggactttcttc	mtr-miR169b	CAGCCAAGGATGACTTGCCGG	5'	Yes	gp2a	...(((((..((((...(((((.(((((.(((......((((...(((((..((((((((((((((..((((.(((.(..(((.....)))..).))).))))..))))))))))))))..)))))...))))...))).))))).)))))...))))...)))))...	163	41.4	-70.9	1	10	9	17	5	6	0	0	0	19	0	0	0	0	6	7	6	7	7	0	0	0	10	10	8	6	0
48	53	gma-miR169d_2ss10GA23TA	TGAGCCAAGAATGACTTGCCGGA	23	arahy.Tifrunner.gnm1.Arahy.04	-	30218332	30218495	atccttttatttttcttaatatcaaagtgtctcgcatgaagggagagggagtagattTGAGCCAAGAATGACTTGCCGGAgcttaagctttcggcaaagtctttctggctctaatttattttctttttcaatcatgcaaaacgctatgataaaaatataagtcc	12	gma-MIR169d,ptc-MIR169t,ptc-MIR169n,ath-MIR169f,aly-MIR169f,mes-MIR169k,vvi-MIR169m,vvi-MIR169p,cme-MIR169r,cme-MIR169t,fve-MIR169f,cas-MIR169f,	gma-MIR169d	agattagtggatgTGAGCCAAGGATGACTTGCCGGTtgtataatagcacccggtttaagtccttcttggttcttatttactattctta	gma-miR169d	TGAGCCAAGGATGACTTGCCGGT	5'	Diff	gp2a	...(((.((((((......(((((.(((((...((((((.(..((((..((((((((.((((((.(((.(((((((((((((....)).)))))).))))).))))))))).))))))))..))))..)..))))))...))))).))))))))))).)))...	158	36	-67.3	1.1	284.5	244	381.5	267.5	243.5	53.5	26.5	90	372	255	198	120	168	157.5	306.5	154	187	160	48.5	64.5	64	345.5	121.5	247.5	157	119
49	54	gma-miR169k_L+1R+1_1ss2CG	TGAGCCAAGAATGACTTGCCGGA	23	arahy.Tifrunner.gnm1.Arahy.14	+	28002005	28002166	atccttttattttccaatatcaaagtgtctcgcatgaagggagagggggtagattTGAGCCAAGAATGACTTGCCGGAgcttaagctttcggcaaagtctttctggctctaatttattttctttttcaatcatgtaaaaagctatgataaaaatataagtcc	19	gma-MIR169k,gma-MIR169j,gma-MIR169l,gma-MIR169d,ptc-MIR169t,ptc-MIR169n,ath-MIR169f,aly-MIR169f,mes-MIR169k,mes-MIR169j,mes-MIR169m,mes-MIR169l,mes-MIR169i,vvi-MIR169m,vvi-MIR169p,cme-MIR169r,cme-MIR169t,fve-MIR169f,cas-MIR169f,	gma-MIR169l	gagtgatttgCAGCCAAGAATGACTTGCCGGaatgcatatatatgcattaggtaccaacatatatagttgtattgtataatttCGGGCAAGTTGTTTTTGGCTACatttatctc	gma-miR169k	CAGCCAAGAATGACTTGCCGG	5'	Diff	gp2a	...(((.((((((....(((((.(((.....((((((.(..(((((..(((((((.(((((.((((.(((((((((((((....)).)))))))).))).))))))))).)))))))..)))))..)..)))))).....))).))))))))))).)))...	156	36.4	-62.4	1.1	284.5	244	381.5	267.5	243.5	53.5	26.5	90	372	255	198	120	168	157.5	306.5	154	187	160	48.5	64.5	64	345.5	121.5	247.5	157	119
50	55	gma-miR169e_L+2	TGAGCCAAGGATGACTTGCCGG	22	arahy.Tifrunner.gnm1.Arahy.14	+	28449641	28449806	aatgtcttgcatgaagaggcagagagagtagactTGAGCCAAGGATGACTTGCCGGcggcgtcatctgttgtagaattagcaagatcccttcttattcggtaattgccgcgcgccggcaaggaatctgggctcacttttgctctctttccgctcatacgagactta	10	gma-MIR169h,gma-MIR169e,gma-MIR169d,ath-MIR169f,ath-MIR169g,aly-MIR169g,aly-MIR169f,vvi-MIR169m,vvi-MIR169p,cas-MIR169f,	gma-MIR169e	gtcttgcatgaagaggtagagagagtgcttttgAGCCAAGGATGACTTGCCGGcgtaattacgggtattgccagcgagacatccttgttcacttatgctctcttttcactcatataagac	gma-miR169e	AGCCAAGGATGACTTGCCGG	5'	Diff	gp2a	...((((((.(((.((.((.((((((((((((..((((((..((((..(((((((((((((.((...((((..((((.((.(((....))))).))))..)))))).))).))))))))))..)))).))))))..)))))))))))))).))))).))))))...	160	50	-80.1	1	0	2.5	3.5	0	0	0	0	0	0	0	0	0	0	0	0	0	0	0	0	0	0	0	2.5	0	0	0
51	55	gma-miR169e_L+2	TGAGCCAAGGATGACTTGCCGG	22	arahy.Tifrunner.gnm1.Arahy.14	+	28487827	28487991	caagagtcttggatgaagagatagagagagtacatgtTGAGCCAAGGATGACTTGCCGGccggcattgcatcttctgcgaaagtaggggtgtgctctttgttaagtggttgccggcgagacatccttgctcatatttactctttttctttcatatcagactcctg	10	gma-MIR169h,gma-MIR169e,gma-MIR169d,ath-MIR169f,ath-MIR169g,aly-MIR169g,aly-MIR169f,vvi-MIR169m,vvi-MIR169p,cas-MIR169f,	gma-MIR169e	gtcttgcatgaagaggtagagagagtgcttttgAGCCAAGGATGACTTGCCGGcgtaattacgggtattgccagcgagacatccttgttcacttatgctctcttttcactcatataagac	gma-miR169e	AGCCAAGGATGACTTGCCGG	5'	Diff	gp2a	((.((((((...(((.(((((..(((((((((.(((.((((.((((((((.(((((((((...(((((((((..((((....))))..).)))).........))))...))))))))).))))))))))))))).)))))))))))))))))...)))))).))	165	46.7	-76.3	1	0	2.5	3.5	0	0	0	0	0	0	0	0	0	0	0	0	0	0	0	0	0	0	0	2.5	0	0	0
52	56	mtr-miR171g	CGAGCCGAATCAATATCACTC	21	arahy.Tifrunner.gnm1.Arahy.08	+	7034885	7035063	caaaagtagtacatggcgtggtattgattcggctcatcctaaatttaatcatgttaaattttagaCGAGCCGAATCAATATCACTCttgtttgcttgtttgcacaaatagaactcttcttgtatacatgaaatattaattctgcagaagtaaacaggtGTGATATTGCTTCGGTTCATT	11	mtr-MIR171g,mtr-MIR171h,gma-MIR171b,gma-MIR171h,lja-MIR171c,ptc-MIR171j,ptc-MIR171m,ptc-MIR171l,ppe-MIR171d,csi-MIR171b,ghr-MIR479,	mtr-MIR171h	aagtagacaggagtggtgttgtttctgctcatcttattaaataatgaatgaatgaatgacatttgcttacttataagaCGAGCCGAATCAATATCACTCcagtacacct	mtr-miR171g	CGAGCCGAATCAATATCACTC	5'	Yes	gp2a	...(((((((((((...((((((((((((((((((.((..(((((((((...)))))))))..)).)))))))))))))))))).((((((((((..((((((.((.(((.....(((.((....)).)))...))).)).)))))))))))))))).))).)))))))).........	67	34.1	-60.2	1	118	92	155.5	115	86.5	28	19	28.5	192	77.5	46.5	56.5	74	55.5	123	30.5	85	53.5	42.5	30.5	28	100.5	70	154	41.5	49
52	57	ppe-miR171d-5p_L-1_2ss11GC22AT	GTGATATTGCTTCGGTTCATT	21	arahy.Tifrunner.gnm1.Arahy.08	+	7034885	7035063	caaaagtagtacatggcgtggtattgattcggctcatcctaaatttaatcatgttaaattttagaCGAGCCGAATCAATATCACTCttgtttgcttgtttgcacaaatagaactcttcttgtatacatgaaatattaattctgcagaagtaaacaggtGTGATATTGCTTCGGTTCATT	11	mtr-MIR171g,mtr-MIR171h,gma-MIR171b,gma-MIR171h,lja-MIR171c,ptc-MIR171j,ptc-MIR171m,ptc-MIR171l,ppe-MIR171d,csi-MIR171b,ghr-MIR479,	ppe-MIR171d	caagtagacatggTGTGATATTGGTTCGGTTCATAtcttttatactttttggatatatccatccatccattcatccatccatccatccatcacacttcacgaatcacaaacaaagatgaCGAGCCGAATCAATATCACTCttgtatgcttg	ppe-miR171d-5p	TGTGATATTGGTTCGGTTCATA	3'	Diff	gp2a	...(((((((((((...((((((((((((((((((.((..(((((((((...)))))))))..)).)))))))))))))))))).((((((((((..((((((.((.(((.....(((.((....)).)))...))).)).)))))))))))))))).))).)))))))).........	67	34.1	-60.2	1	30	0	6	7	0	0	0	5	32	0	0	16	18	0	6	0	26	5	5	0	7	0	10	8	0	0
53	58	ptc-MIR171m-p5_1ss17CT	CGTGGTATTGATCCGGTTCATC	22	arahy.Tifrunner.gnm1.Arahy.17	+	120915334	120915447	ctctgcaaaagtagtacatggCGTGGTATTGATCCGGTTCATCttaaatttattaatcatgttaaattttagaCGAGCCGAATCAATATCACTCttgtttgcttgcttgcacag	12	mtr-MIR171g,mtr-MIR171h,gma-MIR171h,gma-MIR171b,gma-MIR171r,lja-MIR171c,ptc-MIR171l,ptc-MIR171j,ptc-MIR171m,ppe-MIR171d,csi-MIR171b,ghr-MIR479,	ptc-MIR171m	gaagcagacatggcgtggtattgatccggctcatcttctgtatttgcatcagaagttcttcgctgaagaCGAGCCGAATCAATATCACTcttgtacgcttc	ptc-MIR171m-p5	cgtggtattgatccggctcatc	5'	New	gp2a	((.(((((((((((.(((.((.(((((((((((.((((((.(((.(((((((..........))))))).))).)))))).))))))))))).)))))))))))..))))).))	114	36.8	-41.3	1	856	671	1179	987	743	276	190	399	1307	601	563	581	542	436	879	285	1136	441	529	492	463	788	517	1008	325	497
53	56	mtr-miR171g	CGAGCCGAATCAATATCACTC	21	arahy.Tifrunner.gnm1.Arahy.17	+	120915334	120915447	ctctgcaaaagtagtacatggCGTGGTATTGATCCGGTTCATCttaaatttattaatcatgttaaattttagaCGAGCCGAATCAATATCACTCttgtttgcttgcttgcacag	12	mtr-MIR171g,mtr-MIR171h,gma-MIR171h,gma-MIR171b,gma-MIR171r,lja-MIR171c,ptc-MIR171l,ptc-MIR171j,ptc-MIR171m,ppe-MIR171d,csi-MIR171b,ghr-MIR479,	mtr-MIR171h	aagtagacaggagtggtgttgtttctgctcatcttattaaataatgaatgaatgaatgacatttgcttacttataagaCGAGCCGAATCAATATCACTCcagtacacct	mtr-miR171g	CGAGCCGAATCAATATCACTC	3'	Yes	gp2a	((.(((((((((((.(((.((.(((((((((((.((((((.(((.(((((((..........))))))).))).)))))).))))))))))).)))))))))))..))))).))	114	36.8	-41.3	1	118	92	155.5	115	86.5	28	19	28.5	192	77.5	46.5	56.5	74	55.5	123	30.5	85	53.5	42.5	30.5	28	100.5	70	154	41.5	49
54	59	mtr-MIR171b-p5	TATTGGCGCGCCTCAATTTGA	21	arahy.Tifrunner.gnm1.Arahy.08	+	31617710	31617801	aactgaggTATTAGCGCGCCTCAATTTGAatacatggttactaggtaatccgtaaccatgtaatttgaTTGAGCCGCGTCAATATCTTAttt	21	mtr-MIR171b,gma-MIR171p,gma-MIR171n,gma-MIR171m,gma-MIR171t,lja-MIR171b,mdm-MIR171b,mdm-MIR171a,mdm-MIR171p,stu-MIR171b,ppe-MIR171h,mes-MIR171a,vvi-MIR171b,csi-MIR171e,csi-MIR171g,lus-MIR171g,lus-MIR171j,cme-MIR171h,fve-MIR171h,sly-MIR171e,ctr-MIR171,	mtr-MIR171b	agcaaggtattggcgcgcctcaatttgaatacatggctataaaaatgcatcatatcagccatgtagttTGATTGAGCCGCGTCAATATCttgtt	mtr-MIR171b-p5	tattggcgcgcctcaatttga	5'	New	gp2a	...(((((((((..((((.((((((..((.(((((((((((..((....))))))))))))).))..)))))).))))..)))))))))...	86	38	-42.1	1.2	16	10.5	18.5	28.5	11.5	0	0	0	23.5	5.5	7	4	4.5	11.5	20	12	5	5	0	3.5	0	25	7	12.5	4.5	6
54	60	gma-miR171n	TTGAGCCGCGTCAATATCTTA	21	arahy.Tifrunner.gnm1.Arahy.08	+	31617710	31617801	aactgaggTATTAGCGCGCCTCAATTTGAatacatggttactaggtaatccgtaaccatgtaatttgaTTGAGCCGCGTCAATATCTTAttt	21	mtr-MIR171b,gma-MIR171p,gma-MIR171n,gma-MIR171m,gma-MIR171t,lja-MIR171b,mdm-MIR171b,mdm-MIR171a,mdm-MIR171p,stu-MIR171b,ppe-MIR171h,mes-MIR171a,vvi-MIR171b,csi-MIR171e,csi-MIR171g,lus-MIR171g,lus-MIR171j,cme-MIR171h,fve-MIR171h,sly-MIR171e,ctr-MIR171,	gma-MIR171n	atacgaattagcacatgacaaattaaggtattggcgtgcctcaatttgaatacatggctattatgacaaatccagccttgtagtttgaTTGAGCCGCGTCAATATCTTAttttgctcttcttttccatctccta	gma-miR171n	TTGAGCCGCGTCAATATCTTA	3'	Yes	gp2a	...(((((((((..((((.((((((..((.(((((((((((..((....))))))))))))).))..)))))).))))..)))))))))...	86	38	-42.1	1.2	141.5	135.5	143	231.5	100	15	12.5	28	161	75.5	85	61.5	73	73.5	166	61.5	64	82	16	23	21	126.5	108.5	90	77	63
55	59	mtr-MIR171b-p5	TATTGGCGCGCCTCAATTTGA	21	arahy.Tifrunner.gnm1.Arahy.18	+	7588498	7588589	aactgaggTATTGGCGCGCCTCAATTTGAatacatggttactaggtaatccgtagccatgtaatttgaTTGAGCCGCGTCAATATCTTAttt	22	mtr-MIR171b,gma-MIR171p,gma-MIR171n,gma-MIR171t,gma-MIR171m,lja-MIR171b,mdm-MIR171b,mdm-MIR171a,mdm-MIR171p,stu-MIR171b,ppe-MIR171h,mes-MIR171a,vvi-MIR171b,csi-MIR171e,csi-MIR171g,lus-MIR171j,lus-MIR171g,lus-MIR171d,cme-MIR171h,fve-MIR171h,sly-MIR171e,ctr-MIR171,	mtr-MIR171b	agcaaggtattggcgcgcctcaatttgaatacatggctataaaaatgcatcatatcagccatgtagttTGATTGAGCCGCGTCAATATCttgtt	mtr-MIR171b-p5	tattggcgcgcctcaatttga	5'	New	gp2a	...(((((((((((((((.(((((((..(.(((((((((((..((....))))))))))))).)..))))))).)))))))))))))))...	86	40.2	-47.2	1.3	16	10.5	18.5	28.5	11.5	0	0	0	23.5	5.5	7	4	4.5	11.5	20	12	5	5	0	3.5	0	25	7	12.5	4.5	6
55	60	gma-miR171n	TTGAGCCGCGTCAATATCTTA	21	arahy.Tifrunner.gnm1.Arahy.18	+	7588498	7588589	aactgaggTATTGGCGCGCCTCAATTTGAatacatggttactaggtaatccgtagccatgtaatttgaTTGAGCCGCGTCAATATCTTAttt	22	mtr-MIR171b,gma-MIR171p,gma-MIR171n,gma-MIR171t,gma-MIR171m,lja-MIR171b,mdm-MIR171b,mdm-MIR171a,mdm-MIR171p,stu-MIR171b,ppe-MIR171h,mes-MIR171a,vvi-MIR171b,csi-MIR171e,csi-MIR171g,lus-MIR171j,lus-MIR171g,lus-MIR171d,cme-MIR171h,fve-MIR171h,sly-MIR171e,ctr-MIR171,	gma-MIR171n	atacgaattagcacatgacaaattaaggtattggcgtgcctcaatttgaatacatggctattatgacaaatccagccttgtagtttgaTTGAGCCGCGTCAATATCTTAttttgctcttcttttccatctccta	gma-miR171n	TTGAGCCGCGTCAATATCTTA	3'	Yes	gp2a	...(((((((((((((((.(((((((..(.(((((((((((..((....))))))))))))).)..))))))).)))))))))))))))...	86	40.2	-47.2	1.3	141.5	135.5	143	231.5	100	15	12.5	28	161	75.5	85	61.5	73	73.5	166	61.5	64	82	16	23	21	126.5	108.5	90	77	63
56	61	nta-miR171a	TATTGGTGCGGTTCAATGAGA	21	arahy.Tifrunner.gnm1.Arahy.08	+	31829202	31829335	catggggtaagagggaccggtttaacgggaTATTGGTGCGGTTCAATGAGAaagcaatgctcaaaatgtttcaagccttgtttttCTATTGAGCCGTGCCAATATCacgtgccactgctcctaaaaacccctta	12	ath-MIR171b,aly-MIR171b,nta-MIR171a,cme-MIR171d,sly-MIR171c,bra-MIR171c,bna-MIR171c,bra-MIR171b,bna-MIR171a,bra-MIR171d,bna-MIR171b,cas-MIR171b,	nta-MIR171a	atacacgagaTATTGGTGCGGTTCAATGAGAaagcagtactcgacaaattttgactctacttttTGATTGAGCCGTGCCAATATCacgtgtagca	nta-miR171a	TATTGGTGCGGTTCAATGAGA	5'	Yes	gp2a	...(((((....((((.((((...(((.((((((((..((((((((((..(((((((.(((..((....))..))).)))))))..))))))))))..)))))))).)))...)))).))))....)))))...	128	45.5	-63.5	1	0	0	0	0	0	0	0	0	2.5	0	0	0	0	0	2.5	0	0	0	0	0	0	0	0	0	0	0
56	62	nta-miR171c_2ss1TC2GT	CTATTGAGCCGTGCCAATATC	21	arahy.Tifrunner.gnm1.Arahy.08	+	31829202	31829335	catggggtaagagggaccggtttaacgggaTATTGGTGCGGTTCAATGAGAaagcaatgctcaaaatgtttcaagccttgtttttCTATTGAGCCGTGCCAATATCacgtgccactgctcctaaaaacccctta	12	ath-MIR171b,aly-MIR171b,nta-MIR171a,cme-MIR171d,sly-MIR171c,bra-MIR171c,bna-MIR171c,bra-MIR171b,bna-MIR171a,bra-MIR171d,bna-MIR171b,cas-MIR171b,	nta-MIR171a	atacacgagaTATTGGTGCGGTTCAATGAGAaagcagtactcgacaaattttgactctacttttTGATTGAGCCGTGCCAATATCacgtgtagca	nta-miR171c	TGATTGAGCCGTGCCAATATC	3'	Diff	gp2a	...(((((....((((.((((...(((.((((((((..((((((((((..(((((((.(((..((....))..))).)))))))..))))))))))..)))))))).)))...)))).))))....)))))...	128	45.5	-63.5	1	0	3.5	6	5	0	0	0	0	2.5	0	0	0	0	0	3	0	2.5	0	0	0	0	3.5	0	0	0	0
57	61	nta-miR171a	TATTGGTGCGGTTCAATGAGA	21	arahy.Tifrunner.gnm1.Arahy.18	+	7869072	7869207	catgggggtaagagggaccggtttaacgggaTATTGGTGCGGTTCAATGAGAaagcaatgctcaaaatgtttcaagccttgtttttCTATTGAGCCGTGCCAATATCacgtgccactgctcctaaaaaccccttaa	12	ath-MIR171b,aly-MIR171b,nta-MIR171a,cme-MIR171d,sly-MIR171c,bra-MIR171c,bna-MIR171c,bra-MIR171d,bna-MIR171b,bra-MIR171b,bna-MIR171a,cas-MIR171b,	nta-MIR171a	atacacgagaTATTGGTGCGGTTCAATGAGAaagcagtactcgacaaattttgactctacttttTGATTGAGCCGTGCCAATATCacgtgtagca	nta-miR171a	TATTGGTGCGGTTCAATGAGA	5'	Yes	gp2a	...((((((....((((.((((...(((.((((((((..((((((((((..(((((((.(((..((....))..))).)))))))..))))))))))..)))))))).)))...)))).))))....))))))...	130	45.6	-64.4	1	0	0	0	0	0	0	0	0	2.5	0	0	0	0	0	2.5	0	0	0	0	0	0	0	0	0	0	0
57	62	nta-miR171c_2ss1TC2GT	CTATTGAGCCGTGCCAATATC	21	arahy.Tifrunner.gnm1.Arahy.18	+	7869072	7869207	catgggggtaagagggaccggtttaacgggaTATTGGTGCGGTTCAATGAGAaagcaatgctcaaaatgtttcaagccttgtttttCTATTGAGCCGTGCCAATATCacgtgccactgctcctaaaaaccccttaa	12	ath-MIR171b,aly-MIR171b,nta-MIR171a,cme-MIR171d,sly-MIR171c,bra-MIR171c,bna-MIR171c,bra-MIR171d,bna-MIR171b,bra-MIR171b,bna-MIR171a,cas-MIR171b,	nta-MIR171a	atacacgagaTATTGGTGCGGTTCAATGAGAaagcagtactcgacaaattttgactctacttttTGATTGAGCCGTGCCAATATCacgtgtagca	nta-miR171c	TGATTGAGCCGTGCCAATATC	3'	Diff	gp2a	...((((((....((((.((((...(((.((((((((..((((((((((..(((((((.(((..((....))..))).)))))))..))))))))))..)))))))).)))...)))).))))....))))))...	130	45.6	-64.4	1	0	3.5	6	5	0	0	0	0	2.5	0	0	0	0	0	3	0	2.5	0	0	0	0	3.5	0	0	0	0
58	63	ptc-miR171a-5p	GGATATTGGTACGGTTCAATC	21	arahy.Tifrunner.gnm1.Arahy.01	-	103574884	103574981	ataacttgGGATATTGGTACGGTTCAATCaaaaggcggcactttgtaatacaaaagctccgtgttatttgattgagccgtgccaatatcacatgtaag	1	ptc-MIR171a,	ptc-MIR171a	tcagagaaaacgGGATATTGGTACGGTTCAATCagaaagtaatgctcccaaaagtatagagtactattgtttgaTTGAGCCGTGCCAATATCACGtacactcat	ptc-miR171a-5p	GGATATTGGTACGGTTCAATC	5'	Yes	gp2a	...((.((.(((((((((((((((((((((((..((((..((((........))))..))))....))))))))))))))))))))))).)).))...	92	39.8	-45.3	1.2	3.5	0	6	3	4	0	0	0	5.5	3	3.5	3	0	0	5	0	3.5	3.5	0	0	0	0	5.5	4	0	0
59	63	ptc-miR171a-5p	GGATATTGGTACGGTTCAATC	21	arahy.Tifrunner.gnm1.Arahy.04	-	4898227	4898322	gatcatgGGATATTGGTACGGTTCAATCagaaagcagtgctttgatagattctaaagtcctcttatttgattgagccgtgccaatatcacatgttt	1	ptc-MIR171a,	ptc-MIR171a	tcagagaaaacgGGATATTGGTACGGTTCAATCagaaagtaatgctcccaaaagtatagagtactattgtttgaTTGAGCCGTGCCAATATCACGtacactcat	ptc-miR171a-5p	GGATATTGGTACGGTTCAATC	5'	Yes	gp2a	...((((.((((((((((((((((((((((((((.((..((((((.....)).))))..))))).))))))))))))))))))))))).))))...	90	38.5	-48	1.3	3.5	0	6	3	4	0	0	0	5.5	3	3.5	3	0	0	5	0	3.5	3.5	0	0	0	0	5.5	4	0	0
60	64	gma-miR171m	TTGAGCCGCGTCAATATCTCA	21	arahy.Tifrunner.gnm1.Arahy.03	+	13534661	13534748	acaaggtattgacgtgcctcaatttgaagacatacttgagacgagataatcaattatgtaatttaaTTGAGCCGCGTCAATATCTCAt	15	gma-MIR171m,gma-MIR171t,mdm-MIR171b,mdm-MIR171a,mdm-MIR171p,stu-MIR171b,ppe-MIR171h,mes-MIR171a,vvi-MIR171b,csi-MIR171e,csi-MIR171g,cme-MIR171h,fve-MIR171h,sly-MIR171e,ctr-MIR171,	gma-MIR171t	gaagtgctgtatgaagcacaaatcaaggtattggcgcgcctcaatttgaagtcatggttaacatgaaacaagccatgtagttttaaTTGAGCCGCGTCAATATCTCAtcttgcactt	gma-miR171m	TTGAGCCGCGTCAATATCTCA	3'	Yes	gp2a	...(((((((((((((.(((((((.....(((((.((((..........)))).))))).....))))))).)))))))))))))...	82	35.2	-33.5	1.1	35.5	14.5	11.5	45	25.5	0	0	10	15	12	17	9.5	15	12.5	22	19	16.5	10	5	7.5	12	18.5	30	21.5	10	21
61	64	gma-miR171m	TTGAGCCGCGTCAATATCTCA	21	arahy.Tifrunner.gnm1.Arahy.13	+	17458644	17458731	acaaggtattgacgtgcctcaatttgaagacatacttgagacaagataatcaattatgtagtttaaTTGAGCCGCGTCAATATCTCAt	22	mtr-MIR171b,gma-MIR171m,gma-MIR171t,gma-MIR171p,gma-MIR171n,lja-MIR171b,mdm-MIR171b,mdm-MIR171a,mdm-MIR171p,stu-MIR171b,ppe-MIR171h,mes-MIR171a,vvi-MIR171b,csi-MIR171e,csi-MIR171g,lus-MIR171d,lus-MIR171j,lus-MIR171g,cme-MIR171h,fve-MIR171h,sly-MIR171e,ctr-MIR171,	gma-MIR171t	gaagtgctgtatgaagcacaaatcaaggtattggcgcgcctcaatttgaagtcatggttaacatgaaacaagccatgtagttttaaTTGAGCCGCGTCAATATCTCAtcttgcactt	gma-miR171m	TTGAGCCGCGTCAATATCTCA	3'	Yes	gp2a	...(((((((((((((.(((((((..(..(((((.((((..........)))).)))))..)..))))))).)))))))))))))...	82	35.2	-34.2	1.1	35.5	14.5	11.5	45	25.5	0	0	10	15	12	17	9.5	15	12.5	22	19	16.5	10	5	7.5	12	18.5	30	21.5	10	21
62	65	ptc-miR171a-5p_1ss12CA	GGATATTGGTAAGGTTCAATC	21	arahy.Tifrunner.gnm1.Arahy.11	+	137947602	137947699	ataacttgGGATATTGGTAAGGTTCAATCagaaggcggcactttgtaatacaaaagctccgtgttatttgattgagccgtgccaatatcacatgtaag	1	ptc-MIR171a,	ptc-MIR171a	tcagagaaaacgGGATATTGGTACGGTTCAATCagaaagtaatgctcccaaaagtatagagtactattgtttgaTTGAGCCGTGCCAATATCACGtacactcat	ptc-miR171a-5p	GGATATTGGTACGGTTCAATC	5'	Diff	gp2a	...((.((.((((((((((.((((((((((((..((((..((((........))))..))))....)))))))))))).)))))))))).)).))...	92	39.8	-39.7	1	0	0	4.5	9	0	0	0	0	3.5	0	4	0	5	0	0	0	3.5	3.5	0	0	0	0	3	4.5	0	3.5
63	66	mtr-miR172c-5p_2ss2TC7TG	GCAGCAGCATCAAGATTCACA	21	arahy.Tifrunner.gnm1.Arahy.08	-	27239019	27239095	gcgggtGCAGCAGCATCAAGATTCACAaaccctgataaattaggaatttatgAGAATCTTGATGATGCTGCATcagc	97	mtr-MIR172b,mtr-MIR172c,mtr-MIR172d,gma-MIR172b,gma-MIR172h,gma-MIR172i,gma-MIR172g,gma-MIR172f,gma-MIR172j,gma-MIR172a,lja-MIR172c,lja-MIR172b,lja-MIR172a,vun-MIR172,aau-MIR172,ptc-MIR172b,ptc-MIR172f,ptc-MIR172a,ptc-MIR172c,ptc-MIR172e,ath-MIR172a,ath-MIR172b,ath-MIR172c,ath-MIR172d,mdm-MIR172e,mdm-MIR172d,mdm-MIR172f,mdm-MIR172p,mdm-MIR172g,mdm-MIR172h,mdm-MIR172b,mdm-MIR172o,mdm-MIR172c,mdm-M…	mtr-MIR172c	tatttgcagatGTAGCATCATCAAGATTCACAtatgaaagtgcaaatggttttgttggattttgatctgatcgatgcaaatctaagttctccataggtcttttgaactgAGAATCTTGATGATGCTGCATcagccataa	mtr-miR172c-5p	GTAGCATCATCAAGATTCACA	5'	Diff	gp2a	((.(((((((((.(((((((((((.((...(((((....)))))......)).))))))))))).))))))))).))	77	42.9	-37	1.1	20	12	10	9	6	0	0	0	37	13	5	11	21	16	13	9	10	8	0	0	0	28	9	46	10	6
63	67	mtr-miR172b_1ss9GT	AGAATCTTTATGATGCTGCAT	21	arahy.Tifrunner.gnm1.Arahy.08	-	27239019	27239095	gcgggtGCAGCAGCATCAAGATTCACAaaccctgataaattaggaatttatgAGAATCTTGATGATGCTGCATcagc	97	mtr-MIR172b,mtr-MIR172c,mtr-MIR172d,gma-MIR172b,gma-MIR172h,gma-MIR172i,gma-MIR172g,gma-MIR172f,gma-MIR172j,gma-MIR172a,lja-MIR172c,lja-MIR172b,lja-MIR172a,vun-MIR172,aau-MIR172,ptc-MIR172b,ptc-MIR172f,ptc-MIR172a,ptc-MIR172c,ptc-MIR172e,ath-MIR172a,ath-MIR172b,ath-MIR172c,ath-MIR172d,mdm-MIR172e,mdm-MIR172d,mdm-MIR172f,mdm-MIR172p,mdm-MIR172g,mdm-MIR172h,mdm-MIR172b,mdm-MIR172o,mdm-MIR172c,mdm-M…	mtr-MIR172c	tatttgcagatGTAGCATCATCAAGATTCACAtatgaaagtgcaaatggttttgttggattttgatctgatcgatgcaaatctaagttctccataggtcttttgaactgAGAATCTTGATGATGCTGCATcagccataa	mtr-miR172b	AGAATCTTGATGATGCTGCAT	3'	Diff	gp2a	((.(((((((((.(((((((((((.((...(((((....)))))......)).))))))))))).))))))))).))	77	42.9	-37	1.1	5	459	25	13	5	118	89	7	317	463	0	5	5	516.5	24	15	115.5	10	0	0	7	737	19.5	237	7	0
64	68	lus-MIR172a-p5	TAGCATCATCAAGATTCACATT	22	arahy.Tifrunner.gnm1.Arahy.08	-	29209554	29209657	agcagtcgttgtttgcggatgTAGCATCATCAAGATTCACATGctgcaacaagtgctagcttatgAGAATCTTGATGATGCTGCATcggccataaacgacttta	93	mtr-MIR172b,mtr-MIR172c,mtr-MIR172d,gma-MIR172b,gma-MIR172h,gma-MIR172g,gma-MIR172f,gma-MIR172j,gma-MIR172a,lja-MIR172c,lja-MIR172b,lja-MIR172a,vun-MIR172,aau-MIR172,ptc-MIR172b,ptc-MIR172f,ptc-MIR172a,ptc-MIR172c,ath-MIR172a,ath-MIR172b,ath-MIR172c,ath-MIR172d,mdm-MIR172e,mdm-MIR172d,mdm-MIR172f,mdm-MIR172p,mdm-MIR172g,mdm-MIR172h,mdm-MIR172b,mdm-MIR172o,mdm-MIR172c,mdm-MIR172n,mdm-MIR172a,mdm-M…	lus-MIR172a	agtcgttgtttgctggcgtagcatcatcaagattcacattccgaactgggatcatgAGAATCTTGATGATGCTGCATtggccatatacgact	lus-MIR172a-p5	tagcatcatcaagattcacatt	5'	New	gp2a	...(((((((....((.(((((((((((((((((((((.(((((((((.....))).)))..))).))))))))))))))))))))).))....)))))))...	98	43.3	-56.4	1.3	0	4	5	9.5	5	0	0	2.5	7.5	5.5	4	5	9.5	0	12	0	0	5.5	3.5	3	4.5	3.5	3	15	3.5	3.5
64	69	mtr-miR172b_1ss4AC	AGACTCTTGATGATGCTGCAT	21	arahy.Tifrunner.gnm1.Arahy.08	-	29209554	29209657	agcagtcgttgtttgcggatgTAGCATCATCAAGATTCACATGctgcaacaagtgctagcttatgAGAATCTTGATGATGCTGCATcggccataaacgacttta	93	mtr-MIR172b,mtr-MIR172c,mtr-MIR172d,gma-MIR172b,gma-MIR172h,gma-MIR172g,gma-MIR172f,gma-MIR172j,gma-MIR172a,lja-MIR172c,lja-MIR172b,lja-MIR172a,vun-MIR172,aau-MIR172,ptc-MIR172b,ptc-MIR172f,ptc-MIR172a,ptc-MIR172c,ath-MIR172a,ath-MIR172b,ath-MIR172c,ath-MIR172d,mdm-MIR172e,mdm-MIR172d,mdm-MIR172f,mdm-MIR172p,mdm-MIR172g,mdm-MIR172h,mdm-MIR172b,mdm-MIR172o,mdm-MIR172c,mdm-MIR172n,mdm-MIR172a,mdm-M…	mtr-MIR172c	tatttgcagatGTAGCATCATCAAGATTCACAtatgaaagtgcaaatggttttgttggattttgatctgatcgatgcaaatctaagttctccataggtcttttgaactgAGAATCTTGATGATGCTGCATcagccataa	mtr-miR172b	AGAATCTTGATGATGCTGCAT	3'	Diff	gp2a	...(((((((....((.(((((((((((((((((((((.(((((((((.....))).)))..))).))))))))))))))))))))).))....)))))))...	98	43.3	-56.4	1.3	6.5	0	0	0	0	0	0	0	8.5	0	0	2.5	0	0	0	2.5	0	3	0	0	0	17.5	0	102	4	4
65	69	mtr-miR172b_1ss4AC	AGACTCTTGATGATGCTGCAT	21	arahy.Tifrunner.gnm1.Arahy.18	-	3232445	3232547	agagtcattatgtgcgggtgcagcagcatcaagattcacaaaccttgataaattaggaatttatgAGAATCTTGATGATGCTGCATcagcaaattatggctac	93	mtr-MIR172b,mtr-MIR172c,mtr-MIR172d,gma-MIR172b,gma-MIR172h,gma-MIR172g,gma-MIR172f,gma-MIR172j,gma-MIR172a,lja-MIR172c,lja-MIR172b,lja-MIR172a,vun-MIR172,aau-MIR172,ptc-MIR172b,ptc-MIR172f,ptc-MIR172a,ptc-MIR172c,ath-MIR172a,ath-MIR172b,ath-MIR172c,ath-MIR172d,mdm-MIR172e,mdm-MIR172d,mdm-MIR172f,mdm-MIR172p,mdm-MIR172g,mdm-MIR172h,mdm-MIR172b,mdm-MIR172o,mdm-MIR172c,mdm-MIR172n,mdm-MIR172a,mdm-M…	mtr-MIR172c	tatttgcagatGTAGCATCATCAAGATTCACAtatgaaagtgcaaatggttttgttggattttgatctgatcgatgcaaatctaagttctccataggtcttttgaactgAGAATCTTGATGATGCTGCATcagccataa	mtr-miR172b	AGAATCTTGATGATGCTGCAT	3'	Diff	gp2a	..((((((....(((.(((((((((.(((((((((((.((...(((((....)))))......)).))))))))))).))))))))).)))....))))))..	99	38.8	-44.4	1.1	6.5	0	0	0	0	0	0	0	8.5	0	0	2.5	0	0	0	2.5	0	3	0	0	0	17.5	0	102	4	4
66	70	mtr-miR172c-5p_L-1R+1	TAGCATCATCAAGATTCACAT	21	arahy.Tifrunner.gnm1.Arahy.13	+	3073125	3073244	agtcgttatttgcggatgTAGCATCATCAAGATTCACATgcaaatgtagaaggttgtgtatgtgggactttctcttttgaagtgAGAATCTTGATGATGCTGCatcggcaataaacgcct	133	mtr-MIR172c,mtr-MIR172b,mtr-MIR172d,gma-MIR172b,gma-MIR172f,gma-MIR172a,gma-MIR172i,gma-MIR172d,gma-MIR172k,gma-MIR172c,gma-MIR172l,gma-MIR172h,gma-MIR172g,gma-MIR172e,gma-MIR172j,lja-MIR172b,lja-MIR172a,lja-MIR172c,vun-MIR172,aau-MIR172,ptc-MIR172b,ptc-MIR172e,ptc-MIR172g,ptc-MIR172f,ptc-MIR172a,ptc-MIR172d,ptc-MIR172c,ptc-MIR172h,ath-MIR172a,ath-MIR172e,ath-MIR172c,ath-MIR172b,ath-MIR172d,mdm-M…	mtr-MIR172c	tatttgcagatGTAGCATCATCAAGATTCACAtatgaaagtgcaaatggttttgttggattttgatctgatcgatgcaaatctaagttctccataggtcttttgaactgAGAATCTTGATGATGCTGCATcagccataa	mtr-miR172c-5p	GTAGCATCATCAAGATTCACA	5'	Diff	gp2a	((.((((..((((.(((((((((((((((((((((.(((.((((...((((((((..........))))))))..))))..))).))))))))))))))))))))).))))..)))).))	120	40.8	-56.4	1.2	42	59	53	93	60	20	20	42.5	124	37	29	38	36	37	82	25	42	54	42	27	107	48	60	174.5	56	35
66	71	mtr-miR172b_R-2	AGAATCTTGATGATGCTGC	19	arahy.Tifrunner.gnm1.Arahy.13	+	3073125	3073244	agtcgttatttgcggatgTAGCATCATCAAGATTCACATgcaaatgtagaaggttgtgtatgtgggactttctcttttgaagtgAGAATCTTGATGATGCTGCatcggcaataaacgcct	133	mtr-MIR172c,mtr-MIR172b,mtr-MIR172d,gma-MIR172b,gma-MIR172f,gma-MIR172a,gma-MIR172i,gma-MIR172d,gma-MIR172k,gma-MIR172c,gma-MIR172l,gma-MIR172h,gma-MIR172g,gma-MIR172e,gma-MIR172j,lja-MIR172b,lja-MIR172a,lja-MIR172c,vun-MIR172,aau-MIR172,ptc-MIR172b,ptc-MIR172e,ptc-MIR172g,ptc-MIR172f,ptc-MIR172a,ptc-MIR172d,ptc-MIR172c,ptc-MIR172h,ath-MIR172a,ath-MIR172e,ath-MIR172c,ath-MIR172b,ath-MIR172d,mdm-M…	mtr-MIR172b	tgtttgcagatgtagcatcatcaagattcatatgtgaatgatgcagagtggaactgctaatatttcaattgatcttttgaaataAGAATCTTGATGATGCTGCATcagccatat	mtr-miR172b	AGAATCTTGATGATGCTGCAT	3'	Diff	gp2a	((.((((..((((.(((((((((((((((((((((.(((.((((...((((((((..........))))))))..))))..))).))))))))))))))))))))).))))..)))).))	120	40.8	-56.4	1.2	8	0	0	6	0	5	0	5	16	0	0	0	0	0	19	0	0	0	0	0	18	5	0	6	0	0
67	72	mtr-miR172d-5p_L-3	GGAGCATCATCAAGATTCACA	21	arahy.Tifrunner.gnm1.Arahy.13	+	132522825	132522942	accagtcactgtttgccggtGGAGCATCATCAAGATTCACAagttctttcacttagcttggtggttagccatgactatgAGAATCTTGATGATGCTGCAGcagcaataaatgactact	109	mtr-MIR172d,mtr-MIR172c,mtr-MIR172b,gma-MIR172d,gma-MIR172c,gma-MIR172e,gma-MIR172b,gma-MIR172f,gma-MIR172a,gma-MIR172h,gma-MIR172g,gma-MIR172j,lja-MIR172a,lja-MIR172b,lja-MIR172c,vun-MIR172,aau-MIR172,ptc-MIR172g,ptc-MIR172b,ptc-MIR172f,ptc-MIR172a,ptc-MIR172c,ath-MIR172c,ath-MIR172d,ath-MIR172a,ath-MIR172b,mdm-MIR172b,mdm-MIR172o,mdm-MIR172c,mdm-MIR172n,mdm-MIR172a,mdm-MIR172m,mdm-MIR172e,mdm-M…	mtr-MIR172d	agtcagtgtttgctAGTGGAGCATCATCAAGATTCACAagctttatagggcttcaaatcaattagcccttcttcatgttatgAGAATCTTGATGATGCTGCAgcagcaattgatgact	mtr-miR172d-5p	AGTGGAGCATCATCAAGATTCACA	5'	Diff	gp2a	...(((((....((((...((.((((((((((((((((.((((((.........))))))(((((((....)))))))..)))))))))))))))).))...))))....)))))...	112	43.2	-45.1	0.9	12.5	7	13	11	2.5	2.5	2.5	4	29.5	9.5	4.5	5	3.5	7	13.5	0	11.5	13.5	3	0	3.5	19	7	19.5	5	4
67	73	mtr-miR172d-3p_R+1	AGAATCTTGATGATGCTGCAG	21	arahy.Tifrunner.gnm1.Arahy.13	+	132522825	132522942	accagtcactgtttgccggtGGAGCATCATCAAGATTCACAagttctttcacttagcttggtggttagccatgactatgAGAATCTTGATGATGCTGCAGcagcaataaatgactact	109	mtr-MIR172d,mtr-MIR172c,mtr-MIR172b,gma-MIR172d,gma-MIR172c,gma-MIR172e,gma-MIR172b,gma-MIR172f,gma-MIR172a,gma-MIR172h,gma-MIR172g,gma-MIR172j,lja-MIR172a,lja-MIR172b,lja-MIR172c,vun-MIR172,aau-MIR172,ptc-MIR172g,ptc-MIR172b,ptc-MIR172f,ptc-MIR172a,ptc-MIR172c,ath-MIR172c,ath-MIR172d,ath-MIR172a,ath-MIR172b,mdm-MIR172b,mdm-MIR172o,mdm-MIR172c,mdm-MIR172n,mdm-MIR172a,mdm-MIR172m,mdm-MIR172e,mdm-M…	mtr-MIR172d	agtcagtgtttgctAGTGGAGCATCATCAAGATTCACAagctttatagggcttcaaatcaattagcccttcttcatgttatgAGAATCTTGATGATGCTGCAgcagcaattgatgact	mtr-miR172d-3p	AGAATCTTGATGATGCTGCA	3'	Diff	gp2a	...(((((....((((...((.((((((((((((((((.((((((.........))))))(((((((....)))))))..)))))))))))))))).))...))))....)))))...	112	43.2	-45.1	0.9	224	104.5	208.5	226.5	144.5	38	32	58.5	504	96	94.5	134.5	133	114.5	316	133	164	172.5	70.5	59	88.5	150	197	272	145.5	110
68	72	mtr-miR172d-5p_L-3	GGAGCATCATCAAGATTCACA	21	arahy.Tifrunner.gnm1.Arahy.17	+	14220641	14220782	accagtcactgtttgccgatGGAGCATCATCAAGATTCACAtagctttagttgattactgcgtgccttgcctttaattttgcttaattaacttcatagatatgAGAATCTTGATGATGCTGCAGcggcaataaatggctatg	38	mtr-MIR172d,gma-MIR172d,gma-MIR172e,gma-MIR172c,lja-MIR172a,ptc-MIR172b,ptc-MIR172g,ath-MIR172c,ath-MIR172d,mdm-MIR172c,mdm-MIR172n,mdm-MIR172a,mdm-MIR172m,mdm-MIR172b,mdm-MIR172o,gra-MIR172b,stu-MIR172d,aly-MIR172d,aly-MIR172c,aly-MIR172f,ppe-MIR172d,mes-MIR172e,mes-MIR172f,vvi-MIR172c,nta-MIR172a,lus-MIR172i,lus-MIR172e,lus-MIR172g,cme-MIR172e,cme-MIR172a,sly-MIR172d,sly-MIR172c,bra-MIR172c,bna…	mtr-MIR172d	agtcagtgtttgctAGTGGAGCATCATCAAGATTCACAagctttatagggcttcaaatcaattagcccttcttcatgttatgAGAATCTTGATGATGCTGCAgcagcaattgatgact	mtr-miR172d-5p	AGTGGAGCATCATCAAGATTCACA	5'	Diff	gp2a	...(((((....((((((.((.((((((((((((((((.((((.((..(((((((((..(((.................))).)))))))))....)).)))).)))))))))))))))).)).))))))....)))))...	136	39.4	-57.8	1	12.5	7	13	11	2.5	2.5	2.5	4	29.5	9.5	4.5	5	3.5	7	13.5	0	11.5	13.5	3	0	3.5	19	7	19.5	5	4
68	74	mtr-miR172d-3p_R+1_1ss9GT	AGAATCTTTATGATGCTGCAG	21	arahy.Tifrunner.gnm1.Arahy.17	+	14220641	14220782	accagtcactgtttgccgatGGAGCATCATCAAGATTCACAtagctttagttgattactgcgtgccttgcctttaattttgcttaattaacttcatagatatgAGAATCTTGATGATGCTGCAGcggcaataaatggctatg	38	mtr-MIR172d,gma-MIR172d,gma-MIR172e,gma-MIR172c,lja-MIR172a,ptc-MIR172b,ptc-MIR172g,ath-MIR172c,ath-MIR172d,mdm-MIR172c,mdm-MIR172n,mdm-MIR172a,mdm-MIR172m,mdm-MIR172b,mdm-MIR172o,gra-MIR172b,stu-MIR172d,aly-MIR172d,aly-MIR172c,aly-MIR172f,ppe-MIR172d,mes-MIR172e,mes-MIR172f,vvi-MIR172c,nta-MIR172a,lus-MIR172i,lus-MIR172e,lus-MIR172g,cme-MIR172e,cme-MIR172a,sly-MIR172d,sly-MIR172c,bra-MIR172c,bna…	mtr-MIR172d	agtcagtgtttgctAGTGGAGCATCATCAAGATTCACAagctttatagggcttcaaatcaattagcccttcttcatgttatgAGAATCTTGATGATGCTGCAgcagcaattgatgact	mtr-miR172d-3p	AGAATCTTGATGATGCTGCA	3'	Diff	gp2a	...(((((....((((((.((.((((((((((((((((.((((.((..(((((((((..(((.................))).)))))))))....)).)))).)))))))))))))))).)).))))))....)))))...	136	39.4	-57.8	1	26	59	24	29	20	23	13	0	133	73	17	15	16	92	18	8	33	16	0	0	7	140	16	50	9	9
69	75	mtr-miR172c-5p_L-1R+2	TAGCATCATCAAGATTCACATT	22	arahy.Tifrunner.gnm1.Arahy.18	-	4892676	4892779	agcagtcgttgtttgcggatgTAGCATCATCAAGATTCACATGctgcaacaagtgctagcttatgAGAATCTTGATGATGCTGCATCggccataaacgacttta	71	mtr-MIR172b,mtr-MIR172c,gma-MIR172b,gma-MIR172h,gma-MIR172g,gma-MIR172f,gma-MIR172j,gma-MIR172a,lja-MIR172c,lja-MIR172b,vun-MIR172,aau-MIR172,ptc-MIR172b,ptc-MIR172f,ptc-MIR172a,ptc-MIR172c,ath-MIR172a,ath-MIR172b,mdm-MIR172e,mdm-MIR172d,mdm-MIR172f,mdm-MIR172p,mdm-MIR172g,mdm-MIR172h,stu-MIR172b,stu-MIR172a,stu-MIR172e,aly-MIR172a,aly-MIR172b,ppe-MIR172a,ppe-MIR172b,mes-MIR172a,mes-MIR172b,mes-M…	mtr-MIR172c	tatttgcagatGTAGCATCATCAAGATTCACAtatgaaagtgcaaatggttttgttggattttgatctgatcgatgcaaatctaagttctccataggtcttttgaactgAGAATCTTGATGATGCTGCATcagccataa	mtr-miR172c-5p	GTAGCATCATCAAGATTCACA	5'	Diff	gp2a	...(((((((....((.(((((((((((((((((((((.(((((((((.....))).)))..))).))))))))))))))))))))).))....)))))))...	98	43.3	-56.4	1.3	0	4	5	9.5	5	0	0	2.5	7.5	5.5	4	5	9.5	0	12	0	0	5.5	3.5	3	4.5	3.5	3	15	3.5	3.5
69	76	mtr-miR172b_R+1	AGAATCTTGATGATGCTGCATT	22	arahy.Tifrunner.gnm1.Arahy.18	-	4892676	4892779	agcagtcgttgtttgcggatgTAGCATCATCAAGATTCACATGctgcaacaagtgctagcttatgAGAATCTTGATGATGCTGCATCggccataaacgacttta	71	mtr-MIR172b,mtr-MIR172c,gma-MIR172b,gma-MIR172h,gma-MIR172g,gma-MIR172f,gma-MIR172j,gma-MIR172a,lja-MIR172c,lja-MIR172b,vun-MIR172,aau-MIR172,ptc-MIR172b,ptc-MIR172f,ptc-MIR172a,ptc-MIR172c,ath-MIR172a,ath-MIR172b,mdm-MIR172e,mdm-MIR172d,mdm-MIR172f,mdm-MIR172p,mdm-MIR172g,mdm-MIR172h,stu-MIR172b,stu-MIR172a,stu-MIR172e,aly-MIR172a,aly-MIR172b,ppe-MIR172a,ppe-MIR172b,mes-MIR172a,mes-MIR172b,mes-M…	mtr-MIR172c	tatttgcagatGTAGCATCATCAAGATTCACAtatgaaagtgcaaatggttttgttggattttgatctgatcgatgcaaatctaagttctccataggtcttttgaactgAGAATCTTGATGATGCTGCATcagccataa	mtr-miR172b	AGAATCTTGATGATGCTGCAT	3'	Diff	gp2a	...(((((((....((.(((((((((((((((((((((.(((((((((.....))).)))..))).))))))))))))))))))))).))....)))))))...	98	43.3	-56.4	1.3	26	12	37	31	23	8	0	9	37	19	18	23.5	12	14	32	20	11	24	0	12	13	17	22	47	29	12
70	77	mtr-miR172b_1ss21TG	AGAATCTTGATGATGCTGCAG	21	arahy.Tifrunner.gnm1.Arahy.03	+	130130959	130131093	ctcagtcactgtttgccggtggagcatcatcaagattcacaagctttgttaattacacctttctttcacttagcttggtgattagccatgactatgAGAATCTTGATGATGCTGCAGcagcaataaatgacttct	108	mtr-MIR172c,mtr-MIR172d,gma-MIR172b,gma-MIR172d,gma-MIR172f,gma-MIR172a,gma-MIR172c,gma-MIR172h,gma-MIR172g,gma-MIR172e,gma-MIR172j,lja-MIR172b,lja-MIR172a,lja-MIR172c,vun-MIR172,aau-MIR172,ptc-MIR172b,ptc-MIR172g,ptc-MIR172f,ptc-MIR172a,ptc-MIR172c,ptc-MIR172h,ath-MIR172a,ath-MIR172c,ath-MIR172b,ath-MIR172d,mdm-MIR172e,mdm-MIR172b,mdm-MIR172o,mdm-MIR172l,mdm-MIR172d,mdm-MIR172f,mdm-MIR172p,mdm-M…	mtr-MIR172c	tatttgcagatGTAGCATCATCAAGATTCACAtatgaaagtgcaaatggttttgttggattttgatctgatcgatgcaaatctaagttctccataggtcttttgaactgAGAATCTTGATGATGCTGCATcagccataa	mtr-miR172b	AGAATCTTGATGATGCTGCAT	3'	Diff	gp2a	...(((((....((((...((.((((((((((((((((.((((....((((((..((((...((.......))...)))))))))).....)).)).)))))))))))))))).))...))))....)))))...	129	40.7	-45.7	0.8	224	104.5	208.5	226.5	144.5	38	32	58.5	504	96	94.5	134.5	133	114.5	316	133	164	172.5	70.5	59	88.5	150	197	272	145.5	110
71	78	mtr-miR172b_L+1R-1	GAGAATCTTGATGATGCTGCA	21	arahy.Tifrunner.gnm1.Arahy.07	+	11788217	11788366	tgtttgccgatggagcatcatcaagattcacatagctttagttgattactgcgtgccttgcctttaattttgcttaattagttaatccaatttccccctttaattaacttgatagatatGAGAATCTTGATGATGCTGCAgcggcaataa	92	mtr-MIR172c,mtr-MIR172d,gma-MIR172b,gma-MIR172h,gma-MIR172g,gma-MIR172f,gma-MIR172j,gma-MIR172a,lja-MIR172c,lja-MIR172b,lja-MIR172a,vun-MIR172,aau-MIR172,ptc-MIR172b,ptc-MIR172f,ptc-MIR172a,ptc-MIR172c,ath-MIR172a,ath-MIR172b,ath-MIR172c,ath-MIR172d,mdm-MIR172e,mdm-MIR172b,mdm-MIR172o,mdm-MIR172d,mdm-MIR172f,mdm-MIR172p,mdm-MIR172c,mdm-MIR172n,mdm-MIR172a,mdm-MIR172m,mdm-MIR172g,mdm-MIR172h,gra-M…	mtr-MIR172c	tatttgcagatGTAGCATCATCAAGATTCACAtatgaaagtgcaaatggttttgttggattttgatctgatcgatgcaaatctaagttctccataggtcttttgaactgAGAATCTTGATGATGCTGCATcagccataa	mtr-miR172b	AGAATCTTGATGATGCTGCAT	3'	Diff	gp2a	...((((((.((.((((((((((((((((.((((.((..(((((((((..(((.....)))..((((((......))))))...................)))))))))....)).)))).)))))))))))))))).)).))))))...	144	36.7	-53.1	1	12	0	8	7	0	0	0	0	18	0	0	6	7	0	6	5	12	5	0	0	0	9	6	24	11	6
72	79	mes-MIR172c-p5	TGCAGCATCATCAAGATTCTC	21	arahy.Tifrunner.gnm1.Arahy.08	+	27239069	27239141	tgaTGCAGCATCATCAAGATTCTCataaattcctaatttatcagggtttgtgaatcttgatgctgctgcaccc	4	mes-MIR172c,vvi-MIR172a,vvi-MIR172b,cme-MIR172f,	mes-MIR172c	agtcgtttattgccgatgcagcatcatcaagattctcacttcaaataactttggttcatggggatgaagagagaaagagagagaggatcaccaccgtgcatttgcatgTGAATCTTGATGATGCTACGCccgcaaacaacgact	mes-MIR172c-p5	tgcagcatcatcaagattctc	5'	New	gp2a	...(((((((.(((((((((..((((((((.(((........)))))))))))))))))))).)))))))...	67	39.7	-32.5	1.1	4	4	4	3.5	7	0	0	0	7	0	0	2.5	3	0	4	0	0	5	0	2.5	0	5	6.5	5.5	0	2.5
73	79	mes-MIR172c-p5	TGCAGCATCATCAAGATTCTC	21	arahy.Tifrunner.gnm1.Arahy.09	+	119592452	119592547	tgaTGCAGCATCATCAAGATTCTCataactaatctctaccatctccatggagctagttagatttgtatatatgtgaatcttgaaggtgctgcacct	4	mes-MIR172c,vvi-MIR172a,vvi-MIR172b,cme-MIR172f,	mes-MIR172c	agtcgtttattgccgatgcagcatcatcaagattctcacttcaaataactttggttcatggggatgaagagagaaagagagagaggatcaccaccgtgcatttgcatgTGAATCTTGATGATGCTACGCccgcaaacaacgact	mes-MIR172c-p5	tgcagcatcatcaagattctc	5'	New	gp2a	...(((((((((.(((((((((.((((((.(((((..((...(((....)))...)).))))).))...)))).))))))))).)))))))))...	90	38.5	-38.8	1	4	4	4	3.5	7	0	0	0	7	0	0	2.5	3	0	4	0	0	5	0	2.5	0	5	6.5	5.5	0	2.5
74	80	mtr-miR319c-5p_L-1R+1_1ss21GA	GAGTTCCTTGCAGCCCAAAAG	21	arahy.Tifrunner.gnm1.Arahy.01	-	106891627	106891736	tatgaaagttgtagaaatggGAGTTCCTTGCAGCCCAAAAGcatgtccatcaagaactccatgctctcttctTTTGGACTGAAGGGAGCTCCTagttcttctctttcacc	36	mtr-MIR319c,gma-MIR319p,gma-MIR319l,gma-MIR319q,gma-MIR319g,gma-MIR319c,vun-MIR319b,pvu-MIR319c,ptc-MIR319e,ptc-MIR319h,ptc-MIR319f,ptc-MIR319g,ath-MIR319c,ath-MIR159b,mdm-MIR319c,mdm-MIR319h,stu-MIR319b,aly-MIR319c,aly-MIR319d,aly-MIR159b,mes-MIR319g,mes-MIR319f,mes-MIR319h,vvi-MIR319e,csi-MIR159d,lus-MIR319b,lus-MIR159c,cme-MIR319d,cme-MIR319c,fve-MIR319,sly-MIR319c,cas-MIR319c,cas-MIR159b,cas-…	mtr-MIR319c	cagaaatgGGAGTTCCTTGCAGCCCAAAGcgccaagtgagaattctactggcaaattatgttTTGGACTGAAGGGAGCTCCCagttctt	mtr-miR319c-5p	GGAGTTCCTTGCAGCCCAAAG	5'	Diff	gp2a	..((((((....((((.((((((((((((.(((.(((((((((((..............)))))).......))))).))).)))))))))))).))))...))))))..	106	44.5	-41.8	0.9	5.5	0	3	0	2.5	0	0	0	7	2.5	0	2.5	0	0	2.5	0	3	0	0	0	0	0	0	0	0	0
74	81	mtr-miR319a-3p_L+1_1ss21CT	TTTGGACTGAAGGGAGCTCCT	21	arahy.Tifrunner.gnm1.Arahy.01	-	106891627	106891736	tatgaaagttgtagaaatggGAGTTCCTTGCAGCCCAAAAGcatgtccatcaagaactccatgctctcttctTTTGGACTGAAGGGAGCTCCTagttcttctctttcacc	36	mtr-MIR319c,gma-MIR319p,gma-MIR319l,gma-MIR319q,gma-MIR319g,gma-MIR319c,vun-MIR319b,pvu-MIR319c,ptc-MIR319e,ptc-MIR319h,ptc-MIR319f,ptc-MIR319g,ath-MIR319c,ath-MIR159b,mdm-MIR319c,mdm-MIR319h,stu-MIR319b,aly-MIR319c,aly-MIR319d,aly-MIR159b,mes-MIR319g,mes-MIR319f,mes-MIR319h,vvi-MIR319e,csi-MIR159d,lus-MIR319b,lus-MIR159c,cme-MIR319d,cme-MIR319c,fve-MIR319,sly-MIR319c,cas-MIR319c,cas-MIR159b,cas-…	mtr-MIR319c	cagaaatgGGAGTTCCTTGCAGCCCAAAGcgccaagtgagaattctactggcaaattatgttTTGGACTGAAGGGAGCTCCCagttctt	mtr-miR319a-3p	TTGGACTGAAGGGAGCTCCC	3'	Diff	gp2a	..((((((....((((.((((((((((((.(((.(((((((((((..............)))))).......))))).))).)))))))))))).))))...))))))..	106	44.5	-41.8	0.9	330	221.5	346.5	309.5	237	61.5	88	90.5	485	127	147	191	134	132	250.5	133	529.5	164.5	236	141.5	129.5	535	624.5	370	175	183
75	80	mtr-miR319c-5p_L-1R+1_1ss21GA	GAGTTCCTTGCAGCCCAAAAG	21	arahy.Tifrunner.gnm1.Arahy.20	+	9197726	9197837	atatgaaagttgtagaaatggGAGTTCCTTGCAGCCCAAAAGcatgtccatcaagaactccatgctctcttgtTTTGGACTGAAGGGAGCTCCTagttcttctctttcacca	36	mtr-MIR319c,gma-MIR319p,gma-MIR319l,gma-MIR319g,gma-MIR319c,gma-MIR319q,vun-MIR319b,pvu-MIR319c,ptc-MIR319g,ptc-MIR319e,ptc-MIR319h,ptc-MIR319f,ath-MIR319c,ath-MIR159b,mdm-MIR319c,mdm-MIR319h,stu-MIR319b,aly-MIR319d,aly-MIR319c,aly-MIR159b,mes-MIR319f,mes-MIR319h,mes-MIR319g,vvi-MIR319e,csi-MIR159d,lus-MIR319b,lus-MIR159c,cme-MIR319c,cme-MIR319d,fve-MIR319,sly-MIR319c,cas-MIR319c,cas-MIR159b,cas-…	mtr-MIR319c	cagaaatgGGAGTTCCTTGCAGCCCAAAGcgccaagtgagaattctactggcaaattatgttTTGGACTGAAGGGAGCTCCCagttctt	mtr-miR319c-5p	GGAGTTCCTTGCAGCCCAAAG	5'	Diff	gp2a	...((((((....((((.((((((((((((.(((.(((((((((((..............)))))).......))))).))).)))))))))))).))))...))))))...	106	43.8	-41.8	0.9	5.5	0	3	0	2.5	0	0	0	7	2.5	0	2.5	0	0	2.5	0	3	0	0	0	0	0	0	0	0	0
75	81	mtr-miR319a-3p_L+1_1ss21CT	TTTGGACTGAAGGGAGCTCCT	21	arahy.Tifrunner.gnm1.Arahy.20	+	9197726	9197837	atatgaaagttgtagaaatggGAGTTCCTTGCAGCCCAAAAGcatgtccatcaagaactccatgctctcttgtTTTGGACTGAAGGGAGCTCCTagttcttctctttcacca	36	mtr-MIR319c,gma-MIR319p,gma-MIR319l,gma-MIR319g,gma-MIR319c,gma-MIR319q,vun-MIR319b,pvu-MIR319c,ptc-MIR319g,ptc-MIR319e,ptc-MIR319h,ptc-MIR319f,ath-MIR319c,ath-MIR159b,mdm-MIR319c,mdm-MIR319h,stu-MIR319b,aly-MIR319d,aly-MIR319c,aly-MIR159b,mes-MIR319f,mes-MIR319h,mes-MIR319g,vvi-MIR319e,csi-MIR159d,lus-MIR319b,lus-MIR159c,cme-MIR319c,cme-MIR319d,fve-MIR319,sly-MIR319c,cas-MIR319c,cas-MIR159b,cas-…	mtr-MIR319c	cagaaatgGGAGTTCCTTGCAGCCCAAAGcgccaagtgagaattctactggcaaattatgttTTGGACTGAAGGGAGCTCCCagttctt	mtr-miR319a-3p	TTGGACTGAAGGGAGCTCCC	3'	Diff	gp2a	...((((((....((((.((((((((((((.(((.(((((((((((..............)))))).......))))).))).)))))))))))).))))...))))))...	106	43.8	-41.8	0.9	330	221.5	346.5	309.5	237	61.5	88	90.5	485	127	147	191	134	132	250.5	133	529.5	164.5	236	141.5	129.5	535	624.5	370	175	183
76	82	amg-MIR319-p5_2ss12TC20CA	AGGAGCTTCCTCCAGTCCAAT	21	arahy.Tifrunner.gnm1.Arahy.07	-	22980621	22980745	agtgaAGGAGCTTCCTCCAGTCCAATtacaaattagaaaaagaagaatattgttttgttaaattaataaaagaaaaaattatacctctttttctatgttgtTGGACTGAAGGGAGCTCCTTCttt	59	mtr-MIR319c,gma-MIR319q,gma-MIR319g,gma-MIR319c,gma-MIR319l,gma-MIR319h,gma-MIR319e,gma-MIR319p,vun-MIR319b,pvu-MIR319c,amg-MIR319,ptc-MIR319f,ptc-MIR319g,ptc-MIR319e,ptc-MIR319h,ptc-MIR159d,ath-MIR319c,ath-MIR319a,ath-MIR159c,ath-MIR159b,mdm-MIR319c,mdm-MIR319h,mdm-MIR159a,mdm-MIR159c,mdm-MIR159b,stu-MIR319b,aly-MIR319c,aly-MIR319d,aly-MIR319a,aly-MIR159c,aly-MIR159b,mes-MIR319g,mes-MIR319f,mes-…	amg-MIR319	aaggagcttccttcagtccactcatggatagggtaaagggtttgaattagctgctgactcattcattcaaacacaatagaacacaggtttcttcaatacaggctattgtgaatgtgtgaatgatgcaggaggtaaatttcatccttttcttgtctttgcTTGGACTGAAGGGAGCTCCCTtt	amg-MIR319-p5	aggagcttccttcagtccact	5'	New	gp2a	...(((((((((((((.((((((((..(((...((((((((((...(((((.((((((((...)))))))).)).....)))...)))))))))))))..)))))))).)))))))))))))...	119	30.4	-51.2	1.3	0	0	0	0	0	0	0	0	4	2.5	0	0	0	0	0	0	0	0	0	0	0	0	0	0	0	0
76	83	gma-miR319c_L-1R+2	TGGACTGAAGGGAGCTCCTTC	21	arahy.Tifrunner.gnm1.Arahy.07	-	22980621	22980745	agtgaAGGAGCTTCCTCCAGTCCAATtacaaattagaaaaagaagaatattgttttgttaaattaataaaagaaaaaattatacctctttttctatgttgtTGGACTGAAGGGAGCTCCTTCttt	59	mtr-MIR319c,gma-MIR319q,gma-MIR319g,gma-MIR319c,gma-MIR319l,gma-MIR319h,gma-MIR319e,gma-MIR319p,vun-MIR319b,pvu-MIR319c,amg-MIR319,ptc-MIR319f,ptc-MIR319g,ptc-MIR319e,ptc-MIR319h,ptc-MIR159d,ath-MIR319c,ath-MIR319a,ath-MIR159c,ath-MIR159b,mdm-MIR319c,mdm-MIR319h,mdm-MIR159a,mdm-MIR159c,mdm-MIR159b,stu-MIR319b,aly-MIR319c,aly-MIR319d,aly-MIR319a,aly-MIR159c,aly-MIR159b,mes-MIR319g,mes-MIR319f,mes-…	gma-MIR319p	gaaatgggagttccttgcagcccaaagcttcaaggatgaaattcttcctgcggttTTGGACTGAAGGGAGCTCCTactt	gma-miR319c	TTGGACTGAAGGGAGCTCCT	3'	Diff	gp2a	...(((((((((((((.((((((((..(((...((((((((((...(((((.((((((((...)))))))).)).....)))...)))))))))))))..)))))))).)))))))))))))...	119	30.4	-51.2	1.3	740	540.5	927	874	616	119.5	112.5	162	1689	488	231.5	448	415	561.5	1009.5	411	687.5	580	349.5	242	285	992.5	778	918	744.5	469
77	82	amg-MIR319-p5_2ss12TC20CA	AGGAGCTTCCTCCAGTCCAAT	21	arahy.Tifrunner.gnm1.Arahy.17	+	33642864	33642989	agtgaAGGAGCTTCCTCCAGTCCAATtacaaattagaaaaagacgaatattgttttgttaaattaataataaaaaaaaactatacctctttttctatgttgtTGGACTGAAGGGAGCTCCTTCttt	38	mtr-MIR319c,gma-MIR319q,gma-MIR319l,gma-MIR319g,gma-MIR319c,gma-MIR319p,vun-MIR319b,pvu-MIR319c,amg-MIR319,ptc-MIR319f,ptc-MIR319g,ptc-MIR319e,ptc-MIR319h,ath-MIR319c,mdm-MIR319h,mdm-MIR319c,stu-MIR319b,aly-MIR319c,aly-MIR319d,mes-MIR319g,mes-MIR319f,mes-MIR319h,mes-MIR319e,mes-MIR319a,vvi-MIR319b,vvi-MIR319e,csi-MIR159d,lus-MIR319b,cme-MIR319d,cme-MIR319c,cme-MIR319b,fve-MIR319,sly-MIR319c,bra-M…	amg-MIR319	aaggagcttccttcagtccactcatggatagggtaaagggtttgaattagctgctgactcattcattcaaacacaatagaacacaggtttcttcaatacaggctattgtgaatgtgtgaatgatgcaggaggtaaatttcatccttttcttgtctttgcTTGGACTGAAGGGAGCTCCCTtt	amg-MIR319-p5	aggagcttccttcagtccact	5'	New	gp2a	...(((((((((((((.((((((((..(((...((((((((((.........((((((((......))))))))............)))))))))))))..)))))))).)))))))))))))...	120	31	-51.9	1.3	0	0	0	0	0	0	0	0	4	2.5	0	0	0	0	0	0	0	0	0	0	0	0	0	0	0	0
77	83	gma-miR319c_L-1R+2	TGGACTGAAGGGAGCTCCTTC	21	arahy.Tifrunner.gnm1.Arahy.17	+	33642864	33642989	agtgaAGGAGCTTCCTCCAGTCCAATtacaaattagaaaaagacgaatattgttttgttaaattaataataaaaaaaaactatacctctttttctatgttgtTGGACTGAAGGGAGCTCCTTCttt	38	mtr-MIR319c,gma-MIR319q,gma-MIR319l,gma-MIR319g,gma-MIR319c,gma-MIR319p,vun-MIR319b,pvu-MIR319c,amg-MIR319,ptc-MIR319f,ptc-MIR319g,ptc-MIR319e,ptc-MIR319h,ath-MIR319c,mdm-MIR319h,mdm-MIR319c,stu-MIR319b,aly-MIR319c,aly-MIR319d,mes-MIR319g,mes-MIR319f,mes-MIR319h,mes-MIR319e,mes-MIR319a,vvi-MIR319b,vvi-MIR319e,csi-MIR159d,lus-MIR319b,cme-MIR319d,cme-MIR319c,cme-MIR319b,fve-MIR319,sly-MIR319c,bra-M…	gma-MIR319p	gaaatgggagttccttgcagcccaaagcttcaaggatgaaattcttcctgcggttTTGGACTGAAGGGAGCTCCTactt	gma-miR319c	TTGGACTGAAGGGAGCTCCT	3'	Diff	gp2a	...(((((((((((((.((((((((..(((...((((((((((.........((((((((......))))))))............)))))))))))))..)))))))).)))))))))))))...	120	31	-51.9	1.3	740	540.5	927	874	616	119.5	112.5	162	1689	488	231.5	448	415	561.5	1009.5	411	687.5	580	349.5	242	285	992.5	778	918	744.5	469
78	84	gma-miR319d_L+1R-2_1ss21TA	TTGGACTGAAGGGGAGCTCCA	21	arahy.Tifrunner.gnm1.Arahy.18	-	131003268	131003425	agggaaagaaaatgaaggggcttctttcagtcctttcatggagaagggattaaagggttgctgaaatatttaagtgtgaatgaagcgggagatattttgcattatcccctttctctgttcTTGGACTGAAGGGGAGCTCCTtctttctgttgcctcca	3	gma-MIR319o,gma-MIR319d,gma-MIR319i,	gma-MIR319i	aagagagtgaaggagcttccttcagcccacgcatgggttcgggggattgaagggttgctgaagcatctgctgactcattcatacacacagaatagtgattcaaattgctaaggtaattgtgtgaatgaagcaggagatattttgcatccctctttctttgtgctTGGACTGAAGGGGAGCTCCTTCtttctgtt	gma-miR319d	TGGACTGAAGGGGAGCTCCTTC	3'	Diff	gp2a	.(((..(((((..((((((((((((((((((((....(..((((((((......(((((((.(((((((((...(((.......)))..))))))))))))..))))))))))))..)....)))))))).)))))))))))))))))....)))...	154	43	-62.4	0.9	119	36	54	53	34	6	7	0	118	40	11	6	5	107	19	55	51	86	88	48	67	75	163	56	77	51
79	85	mtr-miR390_R+1	AAGCTCAGGAGGGATAGCGCCA	22	arahy.Tifrunner.gnm1.Arahy.02	+	91717763	91717906	tatagtgtggaagaatctgtaAAGCTCAGGAGGGATAGCGCCAcgaaagcatcggcgatgatccgttgtttgtgaagagtttttatgctctttgattttctgtagCGCTATCCATCCTGAGTTTCAtgggttcttcacactgct	55	mtr-MIR390,gma-MIR390g,gma-MIR390a,gma-MIR390f,gma-MIR390e,gma-MIR390c,lja-MIR390b,lja-MIR390a,ptc-MIR390a,ptc-MIR390c,ptc-MIR390b,ptc-MIR390d,ath-MIR390b,ath-MIR390a,mdm-MIR390e,mdm-MIR390f,mdm-MIR390c,mdm-MIR390d,mdm-MIR390b,mdm-MIR390a,aly-MIR390b,aly-MIR390a,ppe-MIR390,mes-MIR390b,mes-MIR390,vvi-MIR390,nta-MIR390b,nta-MIR390c,nta-MIR390a,csi-MIR390a,csi-MIR390b,lus-MIR390b,lus-MIR390d,lus-MIR…	mtr-MIR390	ctgttAAGCTCAGGAGGGATAGCGCCatagaatgtcttctttttttggttccattttattgattgatcttctcttgcgctatccatcctgagtttcatgg	mtr-miR390	AAGCTCAGGAGGGATAGCGCC	5'	Diff	gp2a	..((((((.((((((((..(.((((((((((.(((((((((.((..(((((.(((.......))).)))))..(((((((......)))))))........)).))))))))).)))))))))).)..))))))))))))))..	140	44.4	-68.8	1.1	51	34	66	48	26	4	0	8	148.5	17.5	20.5	27.5	30	47	53.5	24	52	52	17	17	18	51	43.5	91	67.5	28.5
79	86	gma-miR390a-3p_R+1	CGCTATCCATCCTGAGTTTCA	21	arahy.Tifrunner.gnm1.Arahy.02	+	91717763	91717906	tatagtgtggaagaatctgtaAAGCTCAGGAGGGATAGCGCCAcgaaagcatcggcgatgatccgttgtttgtgaagagtttttatgctctttgattttctgtagCGCTATCCATCCTGAGTTTCAtgggttcttcacactgct	55	mtr-MIR390,gma-MIR390g,gma-MIR390a,gma-MIR390f,gma-MIR390e,gma-MIR390c,lja-MIR390b,lja-MIR390a,ptc-MIR390a,ptc-MIR390c,ptc-MIR390b,ptc-MIR390d,ath-MIR390b,ath-MIR390a,mdm-MIR390e,mdm-MIR390f,mdm-MIR390c,mdm-MIR390d,mdm-MIR390b,mdm-MIR390a,aly-MIR390b,aly-MIR390a,ppe-MIR390,mes-MIR390b,mes-MIR390,vvi-MIR390,nta-MIR390b,nta-MIR390c,nta-MIR390a,csi-MIR390a,csi-MIR390b,lus-MIR390b,lus-MIR390d,lus-MIR…	gma-MIR390c	tgtaAAGCTCAGGAGGGATAGCGCCatggatgatctcttctccactcttgatcttctcttgCGCTATCCATCCTGAGTTTCatggcttct	gma-miR390a-3p	CGCTATCCATCCTGAGTTTC	3'	Diff	gp2a	..((((((.((((((((..(.((((((((((.(((((((((.((..(((((.(((.......))).)))))..(((((((......)))))))........)).))))))))).)))))))))).)..))))))))))))))..	140	44.4	-68.8	1.1	3	3.5	5	2.5	2.5	0	0	0	16	3.5	0	4.5	0	5.5	7.5	0	9	5	0	0	6	4	5	13	0	0
80	87	mtr-miR390	AAGCTCAGGAGGGATAGCGCC	21	arahy.Tifrunner.gnm1.Arahy.12	+	106270692	106270837	atatagtgtggaagaatctgtaAAGCTCAGGAGGGATAGCGCCacggaagcatcgacgatgatccgttgtttgtgaagagtttttacgctctttgatcttctgtagCGCTATCCATCCTGAGTTTCAtgggttcttcacactgctt	55	mtr-MIR390,gma-MIR390g,gma-MIR390a,gma-MIR390f,gma-MIR390e,gma-MIR390c,lja-MIR390a,lja-MIR390b,ptc-MIR390a,ptc-MIR390b,ptc-MIR390d,ptc-MIR390c,ath-MIR390b,ath-MIR390a,mdm-MIR390a,mdm-MIR390e,mdm-MIR390f,mdm-MIR390c,mdm-MIR390d,mdm-MIR390b,aly-MIR390b,aly-MIR390a,ppe-MIR390,mes-MIR390b,mes-MIR390,vvi-MIR390,nta-MIR390b,nta-MIR390a,nta-MIR390c,csi-MIR390a,csi-MIR390b,lus-MIR390d,lus-MIR390b,lus-MIR…	mtr-MIR390	ctgttAAGCTCAGGAGGGATAGCGCCatagaatgtcttctttttttggttccattttattgattgatcttctcttgcgctatccatcctgagtttcatgg	mtr-miR390	AAGCTCAGGAGGGATAGCGCC	5'	Yes	gp2a	...((((((.((((((((..(.((((((((((.(((((((((.(((((((.(((.((((((...))))))....(((((((......))))))))))))))))).))))))))).)))))))))).)..))))))))))))))...	140	45.2	-74.2	1.1	4408.5	2115	5310	4839.5	3416	412	305.5	778.5	13152	1804	1439.5	2850	3079.5	3376	5011.5	2080	3870.5	3639.5	1211	1106.5	1314.5	3873.5	3964	6299.5	3268.5	2083
80	86	gma-miR390a-3p_R+1	CGCTATCCATCCTGAGTTTCA	21	arahy.Tifrunner.gnm1.Arahy.12	+	106270692	106270837	atatagtgtggaagaatctgtaAAGCTCAGGAGGGATAGCGCCacggaagcatcgacgatgatccgttgtttgtgaagagtttttacgctctttgatcttctgtagCGCTATCCATCCTGAGTTTCAtgggttcttcacactgctt	55	mtr-MIR390,gma-MIR390g,gma-MIR390a,gma-MIR390f,gma-MIR390e,gma-MIR390c,lja-MIR390a,lja-MIR390b,ptc-MIR390a,ptc-MIR390b,ptc-MIR390d,ptc-MIR390c,ath-MIR390b,ath-MIR390a,mdm-MIR390a,mdm-MIR390e,mdm-MIR390f,mdm-MIR390c,mdm-MIR390d,mdm-MIR390b,aly-MIR390b,aly-MIR390a,ppe-MIR390,mes-MIR390b,mes-MIR390,vvi-MIR390,nta-MIR390b,nta-MIR390a,nta-MIR390c,csi-MIR390a,csi-MIR390b,lus-MIR390d,lus-MIR390b,lus-MIR…	gma-MIR390c	tgtaAAGCTCAGGAGGGATAGCGCCatggatgatctcttctccactcttgatcttctcttgCGCTATCCATCCTGAGTTTCatggcttct	gma-miR390a-3p	CGCTATCCATCCTGAGTTTC	3'	Diff	gp2a	...((((((.((((((((..(.((((((((((.(((((((((.(((((((.(((.((((((...))))))....(((((((......))))))))))))))))).))))))))).)))))))))).)..))))))))))))))...	140	45.2	-74.2	1.1	3	3.5	5	2.5	2.5	0	0	0	16	3.5	0	4.5	0	5.5	7.5	0	9	5	0	0	6	4	5	13	0	0
81	88	mtr-miR390_1ss9GT	AAGCTCAGTAGGGATAGCGCC	21	arahy.Tifrunner.gnm1.Arahy.07	-	20514070	20514177	agtagtaaggtagaatctgttAAGCTCAGGAGGGATAGCGCCacatataacacaattcattcgtattggCGCTATCTATCCTGAGTTTCAcggcttcttcttacttta	60	mtr-MIR390,gma-MIR390g,gma-MIR390a,gma-MIR390f,gma-MIR390e,gma-MIR390c,gma-MIR390d,gma-MIR390b,lja-MIR390b,lja-MIR390a,ptc-MIR390a,ptc-MIR390b,ptc-MIR390d,ptc-MIR390c,ath-MIR390b,ath-MIR390a,mdm-MIR390e,mdm-MIR390f,mdm-MIR390c,mdm-MIR390d,mdm-MIR390b,mdm-MIR390a,stu-MIR390,aly-MIR390b,aly-MIR390a,ppe-MIR390,mes-MIR390b,mes-MIR390,vvi-MIR390,nta-MIR390b,nta-MIR390c,nta-MIR390a,csi-MIR390a,csi-MIR3…	mtr-MIR390	ctgttAAGCTCAGGAGGGATAGCGCCatagaatgtcttctttttttggttccattttattgattgatcttctcttgcgctatccatcctgagtttcatgg	mtr-miR390	AAGCTCAGGAGGGATAGCGCC	5'	Diff	gp2a	...(((((((.((((.((((.((((((((((..((((((((((.((((..............))))))))))))))..)))))))))).)))).)))))))))))...	102	40.7	-50.2	1.1	123.5	993	122.5	69.5	48.5	188	147.5	3	1388.5	819.5	21.5	35.5	39.5	1589	75.5	61	437.5	101	44	45.5	43	2283.5	157	650	96	58.5
81	89	gma-miR390a-3p_R+1_1ss8CT	CGCTATCTATCCTGAGTTTCA	21	arahy.Tifrunner.gnm1.Arahy.07	-	20514070	20514177	agtagtaaggtagaatctgttAAGCTCAGGAGGGATAGCGCCacatataacacaattcattcgtattggCGCTATCTATCCTGAGTTTCAcggcttcttcttacttta	60	mtr-MIR390,gma-MIR390g,gma-MIR390a,gma-MIR390f,gma-MIR390e,gma-MIR390c,gma-MIR390d,gma-MIR390b,lja-MIR390b,lja-MIR390a,ptc-MIR390a,ptc-MIR390b,ptc-MIR390d,ptc-MIR390c,ath-MIR390b,ath-MIR390a,mdm-MIR390e,mdm-MIR390f,mdm-MIR390c,mdm-MIR390d,mdm-MIR390b,mdm-MIR390a,stu-MIR390,aly-MIR390b,aly-MIR390a,ppe-MIR390,mes-MIR390b,mes-MIR390,vvi-MIR390,nta-MIR390b,nta-MIR390c,nta-MIR390a,csi-MIR390a,csi-MIR3…	gma-MIR390c	tgtaAAGCTCAGGAGGGATAGCGCCatggatgatctcttctccactcttgatcttctcttgCGCTATCCATCCTGAGTTTCatggcttct	gma-miR390a-3p	CGCTATCCATCCTGAGTTTC	3'	Diff	gp2a	...(((((((.((((.((((.((((((((((..((((((((((.((((..............))))))))))))))..)))))))))).)))).)))))))))))...	102	40.7	-50.2	1.1	12	6	8	5	5	0	0	5.5	16	7	0	0	4	18	12.5	9.5	9.5	17.5	4.5	0	6.5	12	10	19	5.5	4
82	88	mtr-miR390_1ss9GT	AAGCTCAGTAGGGATAGCGCC	21	arahy.Tifrunner.gnm1.Arahy.17	-	25351080	25351187	agtagtaaggtagaatctgttAAGCTCAGGAGGGATAGCGCCacatataacacaattcattcgtattggCGCTATCTATCCTGAGTTTCAcggcttcttcttacttta	60	mtr-MIR390,gma-MIR390g,gma-MIR390a,gma-MIR390f,gma-MIR390e,gma-MIR390c,gma-MIR390d,gma-MIR390b,lja-MIR390a,lja-MIR390b,ptc-MIR390a,ptc-MIR390b,ptc-MIR390d,ptc-MIR390c,ath-MIR390b,ath-MIR390a,mdm-MIR390a,mdm-MIR390e,mdm-MIR390f,mdm-MIR390c,mdm-MIR390d,mdm-MIR390b,stu-MIR390,aly-MIR390b,aly-MIR390a,ppe-MIR390,mes-MIR390b,mes-MIR390,vvi-MIR390,nta-MIR390b,nta-MIR390c,nta-MIR390a,csi-MIR390a,csi-MIR3…	mtr-MIR390	ctgttAAGCTCAGGAGGGATAGCGCCatagaatgtcttctttttttggttccattttattgattgatcttctcttgcgctatccatcctgagtttcatgg	mtr-miR390	AAGCTCAGGAGGGATAGCGCC	5'	Diff	gp2a	...(((((((.((((.((((.((((((((((..((((((((((.((((..............))))))))))))))..)))))))))).)))).)))))))))))...	102	40.7	-50.2	1.1	123.5	993	122.5	69.5	48.5	188	147.5	3	1388.5	819.5	21.5	35.5	39.5	1589	75.5	61	437.5	101	44	45.5	43	2283.5	157	650	96	58.5
82	89	gma-miR390a-3p_R+1_1ss8CT	CGCTATCTATCCTGAGTTTCA	21	arahy.Tifrunner.gnm1.Arahy.17	-	25351080	25351187	agtagtaaggtagaatctgttAAGCTCAGGAGGGATAGCGCCacatataacacaattcattcgtattggCGCTATCTATCCTGAGTTTCAcggcttcttcttacttta	60	mtr-MIR390,gma-MIR390g,gma-MIR390a,gma-MIR390f,gma-MIR390e,gma-MIR390c,gma-MIR390d,gma-MIR390b,lja-MIR390a,lja-MIR390b,ptc-MIR390a,ptc-MIR390b,ptc-MIR390d,ptc-MIR390c,ath-MIR390b,ath-MIR390a,mdm-MIR390a,mdm-MIR390e,mdm-MIR390f,mdm-MIR390c,mdm-MIR390d,mdm-MIR390b,stu-MIR390,aly-MIR390b,aly-MIR390a,ppe-MIR390,mes-MIR390b,mes-MIR390,vvi-MIR390,nta-MIR390b,nta-MIR390c,nta-MIR390a,csi-MIR390a,csi-MIR3…	gma-MIR390c	tgtaAAGCTCAGGAGGGATAGCGCCatggatgatctcttctccactcttgatcttctcttgCGCTATCCATCCTGAGTTTCatggcttct	gma-miR390a-3p	CGCTATCCATCCTGAGTTTC	3'	Diff	gp2a	...(((((((.((((.((((.((((((((((..((((((((((.((((..............))))))))))))))..)))))))))).)))).)))))))))))...	102	40.7	-50.2	1.1	12	6	8	5	5	0	0	5.5	16	7	0	0	4	18	12.5	9.5	9.5	17.5	4.5	0	6.5	12	10	19	5.5	4
83	87	mtr-miR390	AAGCTCAGGAGGGATAGCGCC	21	arahy.Tifrunner.gnm1.Arahy.01	+	7022808	7022933	gatgaagcaagtatggtagaatctataAAGCTCAGGAGGGATAGCGCCaccgcaaaccatacattattatagtggcgctatctatcctgagttttgtggcttcttcttactattacatgtttctac	54	mtr-MIR390,gma-MIR390g,gma-MIR390a,gma-MIR390f,gma-MIR390e,gma-MIR390c,lja-MIR390a,lja-MIR390b,ptc-MIR390a,ptc-MIR390b,ptc-MIR390d,ptc-MIR390c,ath-MIR390b,ath-MIR390a,mdm-MIR390a,mdm-MIR390e,mdm-MIR390f,mdm-MIR390c,mdm-MIR390d,mdm-MIR390b,aly-MIR390b,aly-MIR390a,ppe-MIR390,mes-MIR390b,mes-MIR390,vvi-MIR390,nta-MIR390b,nta-MIR390c,csi-MIR390a,csi-MIR390b,lus-MIR390d,lus-MIR390b,lus-MIR390a,lus-MIR…	mtr-MIR390	ctgttAAGCTCAGGAGGGATAGCGCCatagaatgtcttctttttttggttccattttattgattgatcttctcttgcgctatccatcctgagtttcatgg	mtr-miR390	AAGCTCAGGAGGGATAGCGCC	5'	Yes	gp2a	...((((((.(((((((((((.(((((((((((((((..(((((((((((.....................)))))))))))..))))))))))))))).))))....))))).)).))))))...	120	40.5	-56.7	1.1	4408.5	2115	5310	4839.5	3416	412	305.5	778.5	13152	1804	1439.5	2850	3079.5	3376	5011.5	2080	3870.5	3639.5	1211	1106.5	1314.5	3873.5	3964	6299.5	3268.5	2083
84	90	mtr-miR390_1ss21CA	AAGCTCAGGAGGGATAGCGCA	21	arahy.Tifrunner.gnm1.Arahy.11	-	3711375	3711500	aatgaagcaagtatggtagaatctgtaAAGCTCAGGAGGGATAGCGCCaccacaaaccatacataattatagtgacgctatctatcctgagttttgtggcttcttcttactattacatgtttctac	60	mtr-MIR390,gma-MIR390g,gma-MIR390a,gma-MIR390f,gma-MIR390e,gma-MIR390c,gma-MIR390d,gma-MIR390b,lja-MIR390a,lja-MIR390b,ptc-MIR390a,ptc-MIR390b,ptc-MIR390d,ptc-MIR390c,ath-MIR390b,ath-MIR390a,mdm-MIR390a,mdm-MIR390e,mdm-MIR390f,mdm-MIR390c,mdm-MIR390d,mdm-MIR390b,stu-MIR390,aly-MIR390b,aly-MIR390a,ppe-MIR390,mes-MIR390b,mes-MIR390,vvi-MIR390,nta-MIR390b,nta-MIR390c,nta-MIR390a,csi-MIR390a,csi-MIR3…	mtr-MIR390	ctgttAAGCTCAGGAGGGATAGCGCCatagaatgtcttctttttttggttccattttattgattgatcttctcttgcgctatccatcctgagtttcatgg	mtr-miR390	AAGCTCAGGAGGGATAGCGCC	5'	Diff	gp2a	...((((((.(((((((((((.(..((((((((((((..(((((((.(((.....................))).)))))))..))))))))))))..).))))....))))).)).))))))...	120	38.9	-48.2	1	283	44.5	199.5	132	88	12.5	5.5	13.5	394.5	49.5	46.5	58.5	104	97	103.5	134	104.5	278	130.5	139.5	154	169	419	164.5	253.5	177
85	91	gma-miR391-5p_R-1_2ss16AG21GA	TACGCAGGAGAGATGGCGCTA	21	arahy.Tifrunner.gnm1.Arahy.08	-	28342739	28342911	aagaggggtgctcatacttgatagcattgaaaggtttgcTACGCAGGAGAGATGGCGCTAtcacttgcatccatcctaccatccattggcatggataggagcaaggtctgtcagcgtcatctcttgtgcgtagcgtacctttgcatatgcaaactaaggtagtcatttctaca	6	gma-MIR391,ptc-MIR3627b,mdm-MIR391,mdm-MIR3627a,mdm-MIR3627b,mdm-MIR3627c,	gma-MIR391	aaggtttgcTACGCAGGAGAGATGACGCTGTcccttgcacccatcctagcttcccttgagtaggtaagagcaaggccagccAGCATCATATCTCCTGCATAGtaaacctt	gma-miR391-5p	TACGCAGGAGAGATGACGCTGT	5'	Diff	gp2a	...((..(((....(((((....((((((((((((..((((((((..((((((((((((..(((((((.(((((((..(((.....)))...)))).))))))))...))..))))))))))))..))))))))..)))))).)).))))......)))))..)))..))...	167	46.8	-77.1	1	17	66.5	26.5	36.5	14.5	4.5	3	14	21.5	23.5	23	13.5	22.5	10	34.5	15	22.5	17.5	14.5	18	21.5	16.5	13	44	6.5	11.5
86	91	gma-miR391-5p_R-1_2ss16AG21GA	TACGCAGGAGAGATGGCGCTA	21	arahy.Tifrunner.gnm1.Arahy.18	-	4114162	4114334	aagagggatgctcatacttgatagcattgaaaggtttgcTACGCAGGAGAGATGGCGCTAtcacttgcatccatcctaccatccattggcatgggtaggagcaaggtctgccagcgtcatctcttgtgcgtagcatacctttgcatatgcaaactaaggtactcatttctaca	6	gma-MIR391,ptc-MIR3627b,mdm-MIR391,mdm-MIR3627a,mdm-MIR3627b,mdm-MIR3627c,	gma-MIR391	aaggtttgcTACGCAGGAGAGATGACGCTGTcccttgcacccatcctagcttcccttgagtaggtaagagcaaggccagccAGCATCATATCTCCTGCATAGtaaacctt	gma-miR391-5p	TACGCAGGAGAGATGACGCTGT	5'	Diff	gp2a	...((..(((....(((((....((((((((((((.(((((((((..((((((((((((..(((((((.(((((((..(((.....)))...)))).))))))))...))..))))))))))))..))))))))).)))))).)).))))......)))))..)))..))...	167	46.8	-76.7	0.9	17	66.5	26.5	36.5	14.5	4.5	3	14	21.5	23.5	23	13.5	22.5	10	34.5	15	22.5	17.5	14.5	18	21.5	16.5	13	44	6.5	11.5
87	92	mtr-miR393a_R+1	TCCAAAGGGATCGCATTGATCC	22	arahy.Tifrunner.gnm1.Arahy.07	-	10559353	10559478	actgcaactggaggaggcaTCCAAAGGGATCGCATTGATCCcaaatctcccatctcttcttctctttcttatctttttttgatttgggATCATGCTATCCCTTTGGATTcctcctttggaagcttc	58	mtr-MIR393a,mtr-MIR393b,gma-MIR393g,gma-MIR393c,gma-MIR393e,gma-MIR393a,gma-MIR393d,gma-MIR393f,gma-MIR393i,gma-MIR393j,gma-MIR393h,gma-MIR393k,ptc-MIR393a,ptc-MIR393b,ptc-MIR393c,ath-MIR393b,ath-MIR393a,mdm-MIR393h,mdm-MIR393g,mdm-MIR393a,mdm-MIR393f,mdm-MIR393b,mdm-MIR393c,mdm-MIR393d,mdm-MIR393e,stu-MIR393,aly-MIR393a,aly-MIR393b,ppe-MIR393a,ppe-MIR393b,mes-MIR393b,mes-MIR393a,mes-MIR393c,mes-…	mtr-MIR393b	aggcaTCCAAAGGGATCGCATTGATCccaaatctaattaagtccctagctacttaattaacaacttaatttccttaatatctcataataTTTGGGATCATGCTATCCCTTtggattcat	mtr-miR393a	TCCAAAGGGATCGCATTGATC	5'	Diff	gp2a	...((..(..(((((((.((((((((((((.(((.((((((((((((.................................))))))))))))))).)))))))))))).)))))))..)..))...	120	43.7	-61.798	1.1	12	15.5	14.5	7.5	9	0	0	2.5	18.5	9.5	3	5	4	12.5	4.5	0	11	5	5	2.5	3.5	19	4.5	14	4	4
87	93	ptc-miR393a-3p	ATCATGCTATCCCTTTGGATT	21	arahy.Tifrunner.gnm1.Arahy.07	-	10559353	10559478	actgcaactggaggaggcaTCCAAAGGGATCGCATTGATCCcaaatctcccatctcttcttctctttcttatctttttttgatttgggATCATGCTATCCCTTTGGATTcctcctttggaagcttc	58	mtr-MIR393a,mtr-MIR393b,gma-MIR393g,gma-MIR393c,gma-MIR393e,gma-MIR393a,gma-MIR393d,gma-MIR393f,gma-MIR393i,gma-MIR393j,gma-MIR393h,gma-MIR393k,ptc-MIR393a,ptc-MIR393b,ptc-MIR393c,ath-MIR393b,ath-MIR393a,mdm-MIR393h,mdm-MIR393g,mdm-MIR393a,mdm-MIR393f,mdm-MIR393b,mdm-MIR393c,mdm-MIR393d,mdm-MIR393e,stu-MIR393,aly-MIR393a,aly-MIR393b,ppe-MIR393a,ppe-MIR393b,mes-MIR393b,mes-MIR393a,mes-MIR393c,mes-…	ptc-MIR393b	agaggaggcaTCCAAAGGGATCGCATTGATCccgagtgtccctggccataattttggATCATGCTATCCCTTTGGATTcctcct	ptc-miR393a-3p	ATCATGCTATCCCTTTGGATT	3'	Yes	gp2a	...((..(..(((((((.((((((((((((.(((.((((((((((((.................................))))))))))))))).)))))))))))).)))))))..)..))...	120	43.7	-61.798	1.1	34.5	28.5	43	49.5	31	3	0	6.5	67.5	25.5	18	16.5	13.5	29.5	27	11.5	46	21.5	10.5	6.5	8.5	45.5	34	33.5	15.5	10
88	92	mtr-miR393a_R+1	TCCAAAGGGATCGCATTGATCC	22	arahy.Tifrunner.gnm1.Arahy.17	-	12650972	12651095	actgcaactggaggaggcaTCCAAAGGGATCGCATTGATCCcaaatctcccatctcttcttctctttcttatcgaaatgatttgggATCATGCTATCCCTTTGGATTcctcctttggaagcttc	58	mtr-MIR393a,mtr-MIR393b,gma-MIR393g,gma-MIR393c,gma-MIR393e,gma-MIR393a,gma-MIR393d,gma-MIR393f,gma-MIR393i,gma-MIR393j,gma-MIR393h,gma-MIR393k,ptc-MIR393b,ptc-MIR393a,ptc-MIR393c,ath-MIR393b,ath-MIR393a,mdm-MIR393h,mdm-MIR393g,mdm-MIR393a,mdm-MIR393f,mdm-MIR393b,mdm-MIR393c,mdm-MIR393d,mdm-MIR393e,stu-MIR393,aly-MIR393a,aly-MIR393b,ppe-MIR393a,ppe-MIR393b,mes-MIR393b,mes-MIR393a,mes-MIR393c,mes-…	mtr-MIR393b	aggcaTCCAAAGGGATCGCATTGATCccaaatctaattaagtccctagctacttaattaacaacttaatttccttaatatctcataataTTTGGGATCATGCTATCCCTTtggattcat	mtr-miR393a	TCCAAAGGGATCGCATTGATC	5'	Diff	gp2a	...((..(..(((((((.((((((((((((.(((.((((((((((((...............................))))))))))))))).)))))))))))).)))))))..)..))...	118	45.2	-61.865	1.1	12	15.5	14.5	7.5	9	0	0	2.5	18.5	9.5	3	5	4	12.5	4.5	0	11	5	5	2.5	3.5	19	4.5	14	4	4
88	93	ptc-miR393a-3p	ATCATGCTATCCCTTTGGATT	21	arahy.Tifrunner.gnm1.Arahy.17	-	12650972	12651095	actgcaactggaggaggcaTCCAAAGGGATCGCATTGATCCcaaatctcccatctcttcttctctttcttatcgaaatgatttgggATCATGCTATCCCTTTGGATTcctcctttggaagcttc	58	mtr-MIR393a,mtr-MIR393b,gma-MIR393g,gma-MIR393c,gma-MIR393e,gma-MIR393a,gma-MIR393d,gma-MIR393f,gma-MIR393i,gma-MIR393j,gma-MIR393h,gma-MIR393k,ptc-MIR393b,ptc-MIR393a,ptc-MIR393c,ath-MIR393b,ath-MIR393a,mdm-MIR393h,mdm-MIR393g,mdm-MIR393a,mdm-MIR393f,mdm-MIR393b,mdm-MIR393c,mdm-MIR393d,mdm-MIR393e,stu-MIR393,aly-MIR393a,aly-MIR393b,ppe-MIR393a,ppe-MIR393b,mes-MIR393b,mes-MIR393a,mes-MIR393c,mes-…	ptc-MIR393a	agaggaggcaTCCAAAGGGATCGCATTGATCccaagtgtctgtcccccataattttggATCATGCTATCCCTTTGGATTcctcct	ptc-miR393a-3p	ATCATGCTATCCCTTTGGATT	3'	Yes	gp2a	...((..(..(((((((.((((((((((((.(((.((((((((((((...............................))))))))))))))).)))))))))))).)))))))..)..))...	118	45.2	-61.865	1.1	34.5	28.5	43	49.5	31	3	0	6.5	67.5	25.5	18	16.5	13.5	29.5	27	11.5	46	21.5	10.5	6.5	8.5	45.5	34	33.5	15.5	10
89	94	mtr-miR393a_R-1	TCCAAAGGGATCGCATTGAT	20	arahy.Tifrunner.gnm1.Arahy.05	+	113171413	113171517	ttggaaaaatTCCAAAGGGATCGCATTGATctaattcttattgatgcctatactttcttggaatcatttttattggatcatgcgatctcttaggaatttttcacc	57	mtr-MIR393a,mtr-MIR393b,gma-MIR393j,gma-MIR393g,gma-MIR393c,gma-MIR393e,gma-MIR393a,gma-MIR393i,gma-MIR393h,gma-MIR393k,gma-MIR393d,gma-MIR393f,ptc-MIR393a,ptc-MIR393c,ptc-MIR393b,ath-MIR393b,ath-MIR393a,mdm-MIR393b,mdm-MIR393c,mdm-MIR393d,mdm-MIR393e,mdm-MIR393a,mdm-MIR393f,mdm-MIR393h,mdm-MIR393g,stu-MIR393,aly-MIR393b,aly-MIR393a,ppe-MIR393a,ppe-MIR393b,mes-MIR393b,mes-MIR393d,mes-MIR393a,mes-…	mtr-MIR393b	aggcaTCCAAAGGGATCGCATTGATCccaaatctaattaagtccctagctacttaattaacaacttaatttccttaatatctcataataTTTGGGATCATGCTATCCCTTtggattcat	mtr-miR393a	TCCAAAGGGATCGCATTGATC	5'	Diff	gp2a	...((((((((((.((((((((((((.((((((((......((((.((...........)).)))).....)))))))))))))))))))).))))))))))...	99	33.3	-45.2	1.3	12	7	11	11.5	3.5	0	0	0	20.5	2.5	0	6.5	2.5	0	7.5	2.5	7	8	3	0	3	6.5	10.5	16.5	8	3.5
90	95	mtr-miR393a_1ss21CT	TCCAAAGGGATCGCATTGATT	21	arahy.Tifrunner.gnm1.Arahy.05	-	113054359	113054486	atcttagtgttgttggaaaatTCCAAAGGGATCGCATTGATCtaattcttattgatgcctatactttcttggaatcattttttattggatcatgcgatctcttaggaatttttcaccatctctaaact	57	mtr-MIR393a,mtr-MIR393b,gma-MIR393j,gma-MIR393g,gma-MIR393c,gma-MIR393e,gma-MIR393a,gma-MIR393i,gma-MIR393h,gma-MIR393k,gma-MIR393d,gma-MIR393f,ptc-MIR393a,ptc-MIR393c,ptc-MIR393b,ath-MIR393b,ath-MIR393a,mdm-MIR393b,mdm-MIR393c,mdm-MIR393d,mdm-MIR393e,mdm-MIR393a,mdm-MIR393f,mdm-MIR393h,mdm-MIR393g,stu-MIR393,aly-MIR393b,aly-MIR393a,ppe-MIR393a,ppe-MIR393b,mes-MIR393b,mes-MIR393d,mes-MIR393a,mes-…	mtr-MIR393b	aggcaTCCAAAGGGATCGCATTGATCccaaatctaattaagtccctagctacttaattaacaacttaatttccttaatatctcataataTTTGGGATCATGCTATCCCTTtggattcat	mtr-miR393a	TCCAAAGGGATCGCATTGATC	5'	Diff	gp2a	...((((...((.(((((((((((.((((((((((((.((((((((......((((.((...........)).))))......)))))))))))))))))))).))))))))))).))...))))...	122	32.8	-50	1.2	11.5	0	7.5	2.5	0	0	0	0	14	7.5	0	6	0	0	3.5	0	0	0	0	0	0	0	3.5	2.5	6	0
91	96	mtr-miR393a	TCCAAAGGGATCGCATTGATC	21	arahy.Tifrunner.gnm1.Arahy.15	-	158231836	158231943	tgttggagaatTCCAAAGGGATCGCATTGATCtaattcttattgatgcctatactttcttggaatcattttttattggatcatgcgatctcttaggaatttttcatca	58	mtr-MIR393a,mtr-MIR393b,gma-MIR393j,gma-MIR393g,gma-MIR393c,gma-MIR393e,gma-MIR393a,gma-MIR393i,gma-MIR393h,gma-MIR393k,gma-MIR393d,gma-MIR393f,ptc-MIR393a,ptc-MIR393c,ptc-MIR393b,ath-MIR393b,ath-MIR393a,mdm-MIR393b,mdm-MIR393c,mdm-MIR393d,mdm-MIR393e,mdm-MIR393a,mdm-MIR393f,mdm-MIR393h,mdm-MIR393g,stu-MIR393,aly-MIR393b,aly-MIR393a,ppe-MIR393a,ppe-MIR393b,mes-MIR393b,mes-MIR393d,mes-MIR393a,mes-…	mtr-MIR393b	aggcaTCCAAAGGGATCGCATTGATCccaaatctaattaagtccctagctacttaattaacaacttaatttccttaatatctcataataTTTGGGATCATGCTATCCCTTtggattcat	mtr-miR393a	TCCAAAGGGATCGCATTGATC	5'	Yes	gp2a	.(.(((((((((((.((((((((((((.((((((((......((((.((...........)).))))......)))))))))))))))))))).))))))))))).).	106	33.3	-46.3	1.3	6	2.5	9.5	4	0	0	0	0	9	0	0	4	2.5	2.5	0	0	2.5	3.5	0	0	0	3.5	10	9.5	3.5	0
92	97	gma-MIR395g-p5	AGTTCCTCTGAACACTTCACA	21	arahy.Tifrunner.gnm1.Arahy.03	-	134398272	134398393	gaatgttggctgtttcttggAGTTCCTCTGAACACTTCACAcatgaggcttaattaatgccaataatgagtcctttccatcagTGAAGTGTTTGGGGGAACTTCaggattcaactaacacgg	70	gma-MIR395g,gma-MIR395f,gma-MIR395d,gma-MIR395e,gma-MIR395c,gma-MIR395a,gma-MIR395b,gma-MIR395k,vun-MIR395,ptc-MIR395c,ptc-MIR395b,ptc-MIR395d,ptc-MIR395g,ptc-MIR395h,ptc-MIR395j,ptc-MIR395i,ath-MIR395d,ath-MIR395a,ath-MIR395e,mdm-MIR395i,mdm-MIR395b,mdm-MIR395c,mdm-MIR395e,mdm-MIR395f,mdm-MIR395d,mdm-MIR395h,mdm-MIR395a,mdm-MIR395g,aly-MIR395g,aly-MIR395d,aly-MIR395e,ppe-MIR395e,ppe-MIR395d,ppe-…	gma-MIR395g	ggttgtctcttggagttcctctgaacacttcacacgtgggactagagtagtggtattgtatcctttagatcatagaatagtcctcatcatcaccaagTGAAGTGTTTGGGGGAACTTTtaggtacaac	gma-MIR395g-p5	agttcctctgaacacttcaca	5'	New	gp2a	...((((((.((..((((((((((((((..((((((((((....((((((((.(((.......))))))).)))).......))))))))))..))))))))))))))..)).))))))...	116	42.6	-55	1.1	0	0	3	0	0	0	0	0	4.5	0	0	0	0	0	0	0	0	0	0	0	0	3.5	0	4.5	0	0
92	98	gma-miR395d_1ss21TC	TGAAGTGTTTGGGGGAACTTC	21	arahy.Tifrunner.gnm1.Arahy.03	-	134398272	134398393	gaatgttggctgtttcttggAGTTCCTCTGAACACTTCACAcatgaggcttaattaatgccaataatgagtcctttccatcagTGAAGTGTTTGGGGGAACTTCaggattcaactaacacgg	70	gma-MIR395g,gma-MIR395f,gma-MIR395d,gma-MIR395e,gma-MIR395c,gma-MIR395a,gma-MIR395b,gma-MIR395k,vun-MIR395,ptc-MIR395c,ptc-MIR395b,ptc-MIR395d,ptc-MIR395g,ptc-MIR395h,ptc-MIR395j,ptc-MIR395i,ath-MIR395d,ath-MIR395a,ath-MIR395e,mdm-MIR395i,mdm-MIR395b,mdm-MIR395c,mdm-MIR395e,mdm-MIR395f,mdm-MIR395d,mdm-MIR395h,mdm-MIR395a,mdm-MIR395g,aly-MIR395g,aly-MIR395d,aly-MIR395e,ppe-MIR395e,ppe-MIR395d,ppe-…	gma-MIR395e	gctgtctcttggagttcctctgagcacttcacgaatgacctagttctatttggtattaccctttagatagaatagtcttatataagTGAAGTGTTTGGGGGAACTTTtgggtacaac	gma-miR395d	TGAAGTGTTTGGGGGAACTTT	3'	Diff	gp2a	...((((((.((..((((((((((((((..((((((((((....((((((((.(((.......))))))).)))).......))))))))))..))))))))))))))..)).))))))...	116	42.6	-55	1.1	24.5	10.5	22.5	24.5	13	0	0	3.5	47	16	4.5	4.5	11.5	14	28.5	10	9.5	14	3.5	4	5.5	23.5	20	26	11.5	13
93	97	gma-MIR395g-p5	AGTTCCTCTGAACACTTCACA	21	arahy.Tifrunner.gnm1.Arahy.13	-	137208206	137208327	gaatgttggctgtttcttggAGTTCCTCTGAACACTTCACAcatgaggcttaattaatgccaataatgagtcctttccatcagTGAAGTGTTTGGGGGAACTTCaggattcaactaacacgg	70	gma-MIR395g,gma-MIR395f,gma-MIR395d,gma-MIR395e,gma-MIR395c,gma-MIR395a,gma-MIR395b,gma-MIR395k,vun-MIR395,ptc-MIR395c,ptc-MIR395b,ptc-MIR395d,ptc-MIR395g,ptc-MIR395h,ptc-MIR395j,ptc-MIR395i,ath-MIR395d,ath-MIR395a,ath-MIR395e,mdm-MIR395i,mdm-MIR395b,mdm-MIR395c,mdm-MIR395e,mdm-MIR395f,mdm-MIR395d,mdm-MIR395h,mdm-MIR395a,mdm-MIR395g,aly-MIR395g,aly-MIR395d,aly-MIR395e,ppe-MIR395e,ppe-MIR395d,ppe-…	gma-MIR395g	ggttgtctcttggagttcctctgaacacttcacacgtgggactagagtagtggtattgtatcctttagatcatagaatagtcctcatcatcaccaagTGAAGTGTTTGGGGGAACTTTtaggtacaac	gma-MIR395g-p5	agttcctctgaacacttcaca	5'	New	gp2a	...((((((.((..((((((((((((((..((((((((((....((((((((.(((.......))))))).)))).......))))))))))..))))))))))))))..)).))))))...	116	42.6	-55	1.1	0	0	3	0	0	0	0	0	4.5	0	0	0	0	0	0	0	0	0	0	0	0	3.5	0	4.5	0	0
93	98	gma-miR395d_1ss21TC	TGAAGTGTTTGGGGGAACTTC	21	arahy.Tifrunner.gnm1.Arahy.13	-	137208206	137208327	gaatgttggctgtttcttggAGTTCCTCTGAACACTTCACAcatgaggcttaattaatgccaataatgagtcctttccatcagTGAAGTGTTTGGGGGAACTTCaggattcaactaacacgg	70	gma-MIR395g,gma-MIR395f,gma-MIR395d,gma-MIR395e,gma-MIR395c,gma-MIR395a,gma-MIR395b,gma-MIR395k,vun-MIR395,ptc-MIR395c,ptc-MIR395b,ptc-MIR395d,ptc-MIR395g,ptc-MIR395h,ptc-MIR395j,ptc-MIR395i,ath-MIR395d,ath-MIR395a,ath-MIR395e,mdm-MIR395i,mdm-MIR395b,mdm-MIR395c,mdm-MIR395e,mdm-MIR395f,mdm-MIR395d,mdm-MIR395h,mdm-MIR395a,mdm-MIR395g,aly-MIR395g,aly-MIR395d,aly-MIR395e,ppe-MIR395e,ppe-MIR395d,ppe-…	gma-MIR395e	gctgtctcttggagttcctctgagcacttcacgaatgacctagttctatttggtattaccctttagatagaatagtcttatataagTGAAGTGTTTGGGGGAACTTTtgggtacaac	gma-miR395d	TGAAGTGTTTGGGGGAACTTT	3'	Diff	gp2a	...((((((.((..((((((((((((((..((((((((((....((((((((.(((.......))))))).)))).......))))))))))..))))))))))))))..)).))))))...	116	42.6	-55	1.1	24.5	10.5	22.5	24.5	13	0	0	3.5	47	16	4.5	4.5	11.5	14	28.5	10	9.5	14	3.5	4	5.5	23.5	20	26	11.5	13
94	99	gma-MIR395l-p5	AGTTCCTCTGAACGCTTCATG	21	arahy.Tifrunner.gnm1.Arahy.05	+	18274658	18274775	atttgttggttgtctcctggAGTTCCTCTGAACGCTTCATGcgactgatggtcgtcgtcgacctaatccttacctccaaTGAAGTGTTTGGGGGAACTcttgggtacaacttacatca	129	mtr-MIR395a,mtr-MIR395l,mtr-MIR395n,mtr-MIR395h,mtr-MIR395i,mtr-MIR395j,mtr-MIR395m,mtr-MIR395d,mtr-MIR395o,mtr-MIR395e,mtr-MIR395f,mtr-MIR395c,mtr-MIR395g,gma-MIR395l,gma-MIR395j,gma-MIR395i,gma-MIR395m,gma-MIR395h,gma-MIR395g,gma-MIR395f,gma-MIR395c,gma-MIR395d,gma-MIR395e,gma-MIR395a,gma-MIR395b,gma-MIR395k,vun-MIR395,ptc-MIR395c,ptc-MIR395k,ptc-MIR395b,ptc-MIR395d,ptc-MIR395g,ptc-MIR395h,ptc-…	gma-MIR395l	ttttctgttggctgtcctttggagttcctctgaacgcttcatgttagtgaggggggtagccagtgtaaactggactggtacccattattataagccttcttATGAAGTGTTTGGGGGAACTCttgggttcaact	gma-MIR395l-p5	agttcctctgaacgcttcatg	5'	New	gp2a	...(((..(((((..((..(((((((((..((((((((((......((((((((....)))))..)))..........))))))))))..)))))))))..))..)))))..)))...	112	47.5	-53.2	0.9	0	0	0	0	0	0	0	0	4	0	0	0	0	0	3	0	5	0	2.5	0	0	10	3	28	2.5	0
94	100	mtr-miR395a_L-1R-1	TGAAGTGTTTGGGGGAACT	19	arahy.Tifrunner.gnm1.Arahy.05	+	18274658	18274775	atttgttggttgtctcctggAGTTCCTCTGAACGCTTCATGcgactgatggtcgtcgtcgacctaatccttacctccaaTGAAGTGTTTGGGGGAACTcttgggtacaacttacatca	129	mtr-MIR395a,mtr-MIR395l,mtr-MIR395n,mtr-MIR395h,mtr-MIR395i,mtr-MIR395j,mtr-MIR395m,mtr-MIR395d,mtr-MIR395o,mtr-MIR395e,mtr-MIR395f,mtr-MIR395c,mtr-MIR395g,gma-MIR395l,gma-MIR395j,gma-MIR395i,gma-MIR395m,gma-MIR395h,gma-MIR395g,gma-MIR395f,gma-MIR395c,gma-MIR395d,gma-MIR395e,gma-MIR395a,gma-MIR395b,gma-MIR395k,vun-MIR395,ptc-MIR395c,ptc-MIR395k,ptc-MIR395b,ptc-MIR395d,ptc-MIR395g,ptc-MIR395h,ptc-…	mtr-MIR395c	gagttcctttgaacgcttcatgcatgagaatatctatttggtctaatatccattagaaaagatagtcttttcttctATGAAGTGTTTGGGGGAACTC	mtr-miR395a	ATGAAGTGTTTGGGGGAACTC	3'	Diff	gp2a	...(((..(((((..((..(((((((((..((((((((((......((((((((....)))))..)))..........))))))))))..)))))))))..))..)))))..)))...	112	47.5	-53.2	0.9	0	0	0	0	0	0	0	0	0	0	0	0	0	0	0	0	3.5	0	0	0	0	0	0	9.5	0	0
95	101	gma-MIR395h-p5	AGTTCCTCTGAACGCTTCATG	21	arahy.Tifrunner.gnm1.Arahy.05	+	18314493	18314609	aatttgttggttgtgtcctggAGTTCCTCTGAACGCTTCATGtgaccgagggtcgtcgacctagtccttcctctcaaTGAAGTGTTTGGGGGAACTCttgggtacaacttacaacac	129	mtr-MIR395a,mtr-MIR395l,mtr-MIR395n,mtr-MIR395i,mtr-MIR395j,mtr-MIR395m,mtr-MIR395d,mtr-MIR395o,mtr-MIR395e,mtr-MIR395f,mtr-MIR395c,mtr-MIR395g,mtr-MIR395h,gma-MIR395h,gma-MIR395l,gma-MIR395c,gma-MIR395j,gma-MIR395i,gma-MIR395m,gma-MIR395a,gma-MIR395b,gma-MIR395k,gma-MIR395g,gma-MIR395f,gma-MIR395d,gma-MIR395e,vun-MIR395,ptc-MIR395c,ptc-MIR395k,ptc-MIR395b,ptc-MIR395d,ptc-MIR395g,ptc-MIR395h,ptc-…	gma-MIR395h	ctgttggctgtctcctggagttcctctgaacgcttcatgtgaggggctagctattataaacgttataagccttctttcaATGAAGTGTTTGGGAGAACTCttgggctcaacca	gma-MIR395h-p5	agttcctctgaacgcttcatg	5'	New	gp2a	...((((..(((((..((..(((((((((..((((((((((.(((..(((((................))))))))))))))))))..)))))))))..))..)))))..))))...	111	48.7	-58.4	1	0	0	0	0	0	0	0	0	4	0	0	0	0	0	3	0	5	0	2.5	0	0	10	3	28	2.5	0
95	102	mtr-miR395a_L-1	TGAAGTGTTTGGGGGAACTC	20	arahy.Tifrunner.gnm1.Arahy.05	+	18314493	18314609	aatttgttggttgtgtcctggAGTTCCTCTGAACGCTTCATGtgaccgagggtcgtcgacctagtccttcctctcaaTGAAGTGTTTGGGGGAACTCttgggtacaacttacaacac	129	mtr-MIR395a,mtr-MIR395l,mtr-MIR395n,mtr-MIR395i,mtr-MIR395j,mtr-MIR395m,mtr-MIR395d,mtr-MIR395o,mtr-MIR395e,mtr-MIR395f,mtr-MIR395c,mtr-MIR395g,mtr-MIR395h,gma-MIR395h,gma-MIR395l,gma-MIR395c,gma-MIR395j,gma-MIR395i,gma-MIR395m,gma-MIR395a,gma-MIR395b,gma-MIR395k,gma-MIR395g,gma-MIR395f,gma-MIR395d,gma-MIR395e,vun-MIR395,ptc-MIR395c,ptc-MIR395k,ptc-MIR395b,ptc-MIR395d,ptc-MIR395g,ptc-MIR395h,ptc-…	mtr-MIR395c	gagttcctttgaacgcttcatgcatgagaatatctatttggtctaatatccattagaaaagatagtcttttcttctATGAAGTGTTTGGGGGAACTC	mtr-miR395a	ATGAAGTGTTTGGGGGAACTC	3'	Diff	gp2a	...((((..(((((..((..(((((((((..((((((((((.(((..(((((................))))))))))))))))))..)))))))))..))..)))))..))))...	111	48.7	-58.4	1	23.5	0	3	11.5	13.5	0	0	0	10.5	6.5	0	0	4	8	8	5	13	2.5	5	0	0	9.5	8	33	10	0
96	103	mtr-MIR395g-p5	AGTTCCTCTGAACGCTTCATA	21	arahy.Tifrunner.gnm1.Arahy.05	+	18337156	18337252	tggggtgttccttagAGTTCCTCTGAACGCTTCATAtatatatacacatattattaaatgaaTGAAGTGTTTGGGGGAACTCTtgggtgcaactaac	31	mtr-MIR395a,mtr-MIR395g,gma-MIR395l,gma-MIR395j,gma-MIR395i,gma-MIR395m,gma-MIR395k,ptc-MIR395k,ptc-MIR395e,ptc-MIR395f,ppe-MIR395n,ppe-MIR395m,ppe-MIR395j,ppe-MIR395k,nta-MIR395a,nta-MIR395b,csi-MIR395a,csi-MIR395c,lus-MIR395b,lus-MIR395c,lus-MIR395a,lus-MIR395d,cme-MIR395e,cme-MIR395f,cme-MIR395d,cme-MIR395c,cme-MIR395b,cme-MIR395a,rco-MIR395b,rco-MIR395a,rco-MIR395e,	mtr-MIR395g	gagttcctctgaacgcttcatataagaggttatccatcttcaTTGAAGTGTTTGGGGGAACTC	mtr-MIR395g-p5	agttcctctgaacgcttcata	5'	New	gp2a	(((..((..((..((((((((((..((((((((((..........................))))))))))..))))))))))..))..)).)))..	95	38.1	-39.3	1.1	0	0	0	0	0	0	0	0	0	0	0	0	0	0	0	0	2.5	0	0	0	0	0	0	8	0	0
96	104	mtr-miR395a_L-1R+1_2	TGAAGTGTTTGGGGGAACTCT	21	arahy.Tifrunner.gnm1.Arahy.05	+	18337156	18337252	tggggtgttccttagAGTTCCTCTGAACGCTTCATAtatatatacacatattattaaatgaaTGAAGTGTTTGGGGGAACTCTtgggtgcaactaac	31	mtr-MIR395a,mtr-MIR395g,gma-MIR395l,gma-MIR395j,gma-MIR395i,gma-MIR395m,gma-MIR395k,ptc-MIR395k,ptc-MIR395e,ptc-MIR395f,ppe-MIR395n,ppe-MIR395m,ppe-MIR395j,ppe-MIR395k,nta-MIR395a,nta-MIR395b,csi-MIR395a,csi-MIR395c,lus-MIR395b,lus-MIR395c,lus-MIR395a,lus-MIR395d,cme-MIR395e,cme-MIR395f,cme-MIR395d,cme-MIR395c,cme-MIR395b,cme-MIR395a,rco-MIR395b,rco-MIR395a,rco-MIR395e,	mtr-MIR395a	tttttgttgattgtttcttagagttcctttgaacgcttcatgcatgagaatatgtatttggtctaatatccattagaaaagatagttcttcatcaATGAAGTGTTTGGGGGAACTCttgggttcaaccagcacca	mtr-miR395a	ATGAAGTGTTTGGGGGAACTC	3'	Diff	gp2a	(((..((..((..((((((((((..((((((((((..........................))))))))))..))))))))))..))..)).)))..	95	38.1	-39.3	1.1	15	0	3	6.5	6.5	0	0	0	5	3	0	0	0	2.5	3	0	3	0	5	0	0	3	2.5	9.5	3	0
97	103	mtr-MIR395g-p5	AGTTCCTCTGAACGCTTCATA	21	arahy.Tifrunner.gnm1.Arahy.15	-	38177335	38177455	atttgttggttgtctcctggAGTTCCTCTGAACGCTTCATAcgactgatggtcgtcgtcggcgacctaatccttacttccaatgaagtgtttgggggaactcttgggtacaacttacatca	2	mtr-MIR395g,gma-MIR395k,	mtr-MIR395g	gagttcctctgaacgcttcatataagaggttatccatcttcaTTGAAGTGTTTGGGGGAACTC	mtr-MIR395g-p5	agttcctctgaacgcttcata	5'	New	gp2a	...(((..(((((..((..(((((((((..((((((((((..((..(((((((((.....))))))..)))......))..))))))))))..)))))))))..))..)))))..)))...	115	47.1	-55.1	1	0	0	0	0	0	0	0	0	0	0	0	0	0	0	0	0	2.5	0	0	0	0	0	0	8	0	0
98	105	mtr-miR395a_L+1R-1_1ss21TC	TATGAAGTGTTTGGGGGAACC	21	arahy.Tifrunner.gnm1.Arahy.03	+	134399356	134399470	atcatcgggtggtacctagtgttccctcgaacacttcaacgaccagaactttcagctacgacattctctgtgttcTATGAAGTGTTTGGGGGAACCcttggtatcatttgataaa	23	mtr-MIR395f,mtr-MIR395c,mtr-MIR395i,mtr-MIR395m,mtr-MIR395d,mtr-MIR395a,mtr-MIR395l,mtr-MIR395n,mtr-MIR395h,mtr-MIR395j,mtr-MIR395o,mtr-MIR395e,gma-MIR395l,gma-MIR395i,gma-MIR395m,gma-MIR395k,gma-MIR395f,gma-MIR395j,mdm-MIR395l,mdm-MIR395k,cme-MIR395b,cme-MIR395c,eun-MIR395,	mtr-MIR395e	gagttcctttgaacgcttcatgcatgagaatatctatctatttggtttaaaatccattaggatagatagttcttcttaaATGAAGTGTTTGGGGGAACTC	mtr-miR395a	ATGAAGTGTTTGGGGGAACTC	3'	Diff	gp2a	...(((..((((((((.((.((((((((((((((((((..(((((((....((......)).....)))).)))...)))))))))))))))))).)).))))))))..)))...	109	44.3	-52.9	1	125	58.5	90.5	118.5	58.5	16	12.5	30	221.5	49.5	33	49.5	71.5	68.5	145	71	79.5	69.5	32.5	37.5	43	98	87	180.5	67.5	51
99	105	mtr-miR395a_L+1R-1_1ss21TC	TATGAAGTGTTTGGGGGAACC	21	arahy.Tifrunner.gnm1.Arahy.13	+	137209289	137209403	atcatcgggtggtacctagtgttccctcgaacacttcaacgaccagaactttcagctacaacattctctgtgttcTATGAAGTGTTTGGGGGAACCcttggtatcatttgataaa	23	mtr-MIR395f,mtr-MIR395c,mtr-MIR395i,mtr-MIR395m,mtr-MIR395d,mtr-MIR395a,mtr-MIR395l,mtr-MIR395n,mtr-MIR395h,mtr-MIR395j,mtr-MIR395o,mtr-MIR395e,gma-MIR395l,gma-MIR395i,gma-MIR395m,gma-MIR395k,gma-MIR395f,gma-MIR395j,mdm-MIR395l,mdm-MIR395k,cme-MIR395b,cme-MIR395c,eun-MIR395,	mtr-MIR395e	gagttcctttgaacgcttcatgcatgagaatatctatctatttggtttaaaatccattaggatagatagttcttcttaaATGAAGTGTTTGGGGGAACTC	mtr-miR395a	ATGAAGTGTTTGGGGGAACTC	3'	Diff	gp2a	...(((..((((((((.((.((((((((((((((((((..(((((((...................)))).)))...)))))))))))))))))).)).))))))))..)))...	109	43.5	-52	1	125	58.5	90.5	118.5	58.5	16	12.5	30	221.5	49.5	33	49.5	71.5	68.5	145	71	79.5	69.5	32.5	37.5	43	98	87	180.5	67.5	51
100	106	gma-miR395a_L-1R+1	TGAAGTGTTTGGGGGAACTCC	21	arahy.Tifrunner.gnm1.Arahy.05	+	18328910	18329041	atttgttggttgtctcttggagttcctctgaacgcttcatgtgtgtgctagctagtaaccatttgctataacagatatagtatgttcttcaaaTGAAGTGTTTGGGGGAACTCCacggtgcattcgacattg	66	gma-MIR395c,gma-MIR395a,gma-MIR395b,gma-MIR395k,vun-MIR395,ptc-MIR395c,ptc-MIR395b,ptc-MIR395d,ptc-MIR395g,ptc-MIR395h,ptc-MIR395j,ptc-MIR395i,ath-MIR395d,ath-MIR395a,ath-MIR395e,mdm-MIR395i,mdm-MIR395b,mdm-MIR395c,mdm-MIR395e,mdm-MIR395f,mdm-MIR395d,mdm-MIR395h,mdm-MIR395a,mdm-MIR395g,aly-MIR395g,aly-MIR395d,aly-MIR395e,ppe-MIR395e,ppe-MIR395d,ppe-MIR395i,ppe-MIR395l,ppe-MIR395h,ppe-MIR395c,ppe-…	gma-MIR395b	tccctagagtttccctgaacacttcattaaagggctttattgaaatataatccaaagttagtctataCTGAAGTGTTTGGGGGAACTCctggtga	gma-miR395a	CTGAAGTGTTTGGGGGAACTC	3'	Diff	gp2a	...(((((..(((..(.(((((((((((..(((((((((((((..((((....))))..))).(((((((.....)))))))..........))))))))))..))))))))))).)..)))..)))))...	126	41.7	-54.3	1	30	22	29.5	58.5	42.5	3.5	4	17.5	73	25.5	12.5	21	14.5	30	20.5	13	59.5	17.5	12.5	13.5	3	42	29.5	75.5	20	7
101	107	mtr-miR395a_L-1R+1_1	TGAAGTGTTTGGGGGAACTCC	21	arahy.Tifrunner.gnm1.Arahy.05	+	24447691	24447774	ttccctagagttccccgcagacacttcagatatatatggtctctcgtatatttattcTGAAGTGTTTGGGGGAACTCCtggtag	123	mtr-MIR395a,mtr-MIR395l,mtr-MIR395n,mtr-MIR395i,mtr-MIR395j,mtr-MIR395m,mtr-MIR395d,mtr-MIR395o,mtr-MIR395e,mtr-MIR395f,mtr-MIR395c,mtr-MIR395g,gma-MIR395c,gma-MIR395a,gma-MIR395b,gma-MIR395k,gma-MIR395l,gma-MIR395j,gma-MIR395i,gma-MIR395m,vun-MIR395,ptc-MIR395c,ptc-MIR395b,ptc-MIR395d,ptc-MIR395g,ptc-MIR395h,ptc-MIR395j,ptc-MIR395i,ptc-MIR395k,ptc-MIR395e,ptc-MIR395f,ath-MIR395d,ath-MIR395a,ath-…	mtr-MIR395c	gagttcctttgaacgcttcatgcatgagaatatctatttggtctaatatccattagaaaagatagtcttttcttctATGAAGTGTTTGGGGGAACTC	mtr-miR395a	ATGAAGTGTTTGGGGGAACTC	3'	Diff	gp2a	...((..(((((((((.(((((((((((((.((((((((....))))))))....))))))))))))))))))))))..))...	78	44	-45	1.2	30	22	29.5	58.5	42.5	3.5	4	17.5	73	25.5	12.5	21	14.5	30	20.5	13	59.5	17.5	12.5	13.5	3	42	29.5	75.5	20	7
102	108	mtr-miR396a-5p	TTCCACAGCTTTCTTGAACTT	21	arahy.Tifrunner.gnm1.Arahy.01	-	98780156	98780322	atcagatctgagtcctggtcatgcttTTCCACAGCTTTCTTGAACTTcttgtatgtgcatccatccatctcaacttcttctaagtaagtatgtaattacagtcttatccctacaactaagcaagaagCTCAAGAAAGCTGTGGGAGAatatggcaatttcaggcctt	45	mtr-MIR396a,gma-MIR396c,gma-MIR396g,gma-MIR396b,gma-MIR396f,gma-MIR396d,gma-MIR396k,ptc-MIR396d,ptc-MIR396c,ptc-MIR396e,ptc-MIR396g,ath-MIR396b,mdm-MIR396c,mdm-MIR396d,mdm-MIR396e,stu-MIR396,aly-MIR396b,ppe-MIR396b,ppe-MIR396a,mes-MIR396d,mes-MIR396f,mes-MIR396e,mes-MIR396c,vvi-MIR396b,vvi-MIR396a,nta-MIR396c,nta-MIR396b,csi-MIR396f,csi-MIR396c,csi-MIR396d,lus-MIR396e,lus-MIR396b,cme-MIR396c,cme-…	mtr-MIR396a	tgcttTTCCACAGCTTTCTTGAACTTctttcgtatcttaaatctgttttcaagattaaaagtcctagaaGCTCAAGAAAGCTGTGGGAGAata	mtr-miR396a-5p	TTCCACAGCTTTCTTGAACTT	5'	Yes	gp2a	...((..(((((.....(((((..(((((((((((((((((((.((((((((..(((....)))...................(((((..(((....)))..)))))............)))))))).)))))))))))))))))))..)))))...)))))..)).	163	40.1	-58.4	0.9	1361	1296.5	1243	2617.5	1357	275	227.5	494	2864.5	1215.5	953.5	855	748	1746.5	2306.5	848	1635.5	1118.5	460.5	552.5	679.5	1129.5	1416.5	2013	550.5	629.5
102	109	mtr-miR396a-3p_L-1	CTCAAGAAAGCTGTGGGAGA	20	arahy.Tifrunner.gnm1.Arahy.01	-	98780156	98780322	atcagatctgagtcctggtcatgcttTTCCACAGCTTTCTTGAACTTcttgtatgtgcatccatccatctcaacttcttctaagtaagtatgtaattacagtcttatccctacaactaagcaagaagCTCAAGAAAGCTGTGGGAGAatatggcaatttcaggcctt	45	mtr-MIR396a,gma-MIR396c,gma-MIR396g,gma-MIR396b,gma-MIR396f,gma-MIR396d,gma-MIR396k,ptc-MIR396d,ptc-MIR396c,ptc-MIR396e,ptc-MIR396g,ath-MIR396b,mdm-MIR396c,mdm-MIR396d,mdm-MIR396e,stu-MIR396,aly-MIR396b,ppe-MIR396b,ppe-MIR396a,mes-MIR396d,mes-MIR396f,mes-MIR396e,mes-MIR396c,vvi-MIR396b,vvi-MIR396a,nta-MIR396c,nta-MIR396b,csi-MIR396f,csi-MIR396c,csi-MIR396d,lus-MIR396e,lus-MIR396b,cme-MIR396c,cme-…	mtr-MIR396a	tgcttTTCCACAGCTTTCTTGAACTTctttcgtatcttaaatctgttttcaagattaaaagtcctagaaGCTCAAGAAAGCTGTGGGAGAata	mtr-miR396a-3p	GCTCAAGAAAGCTGTGGGAGA	3'	Diff	gp2a	...((..(((((.....(((((..(((((((((((((((((((.((((((((..(((....)))...................(((((..(((....)))..)))))............)))))))).)))))))))))))))))))..)))))...)))))..)).	163	40.1	-58.4	0.9	498.5	410	407.5	717.5	353.5	71.5	65	124	1045	431	201.5	276.5	209	569	792.5	319	545.5	348	165.5	142	211	425	497	688.5	251	178.5
103	108	mtr-miR396a-5p	TTCCACAGCTTTCTTGAACTT	21	arahy.Tifrunner.gnm1.Arahy.11	+	145486196	145486348	atcagatctgagtcctggtcatgcttTTCCACAGCTTTCTTGAACTTcttgtatgtgcatccatctcaacttcttctaagtaagtatgtaattacagtcttaaccaagaagCTCAAGAAAGCTGTGGGAGAatatggcaatttcaggcctttc	45	mtr-MIR396a,gma-MIR396d,gma-MIR396c,gma-MIR396g,gma-MIR396b,gma-MIR396f,gma-MIR396k,ptc-MIR396d,ptc-MIR396c,ptc-MIR396e,ptc-MIR396g,ath-MIR396b,mdm-MIR396d,mdm-MIR396e,mdm-MIR396c,stu-MIR396,aly-MIR396b,ppe-MIR396b,ppe-MIR396a,mes-MIR396d,mes-MIR396f,mes-MIR396e,mes-MIR396c,vvi-MIR396b,vvi-MIR396a,nta-MIR396c,nta-MIR396b,csi-MIR396c,csi-MIR396f,csi-MIR396d,lus-MIR396e,lus-MIR396b,cme-MIR396c,cme-…	mtr-MIR396a	tgcttTTCCACAGCTTTCTTGAACTTctttcgtatcttaaatctgttttcaagattaaaagtcctagaaGCTCAAGAAAGCTGTGGGAGAata	mtr-miR396a-5p	TTCCACAGCTTTCTTGAACTT	5'	Yes	gp2a	...((..(((((.....(((((..(((((((((((((((((((.(((((((...(((....)))............((((...(((......)))...))))..))))))).)))))))))))))))))))..)))))...)))))..))...	147	39.9	-55.7	0.9	1361	1296.5	1243	2617.5	1357	275	227.5	494	2864.5	1215.5	953.5	855	748	1746.5	2306.5	848	1635.5	1118.5	460.5	552.5	679.5	1129.5	1416.5	2013	550.5	629.5
103	109	mtr-miR396a-3p_L-1	CTCAAGAAAGCTGTGGGAGA	20	arahy.Tifrunner.gnm1.Arahy.11	+	145486196	145486348	atcagatctgagtcctggtcatgcttTTCCACAGCTTTCTTGAACTTcttgtatgtgcatccatctcaacttcttctaagtaagtatgtaattacagtcttaaccaagaagCTCAAGAAAGCTGTGGGAGAatatggcaatttcaggcctttc	45	mtr-MIR396a,gma-MIR396d,gma-MIR396c,gma-MIR396g,gma-MIR396b,gma-MIR396f,gma-MIR396k,ptc-MIR396d,ptc-MIR396c,ptc-MIR396e,ptc-MIR396g,ath-MIR396b,mdm-MIR396d,mdm-MIR396e,mdm-MIR396c,stu-MIR396,aly-MIR396b,ppe-MIR396b,ppe-MIR396a,mes-MIR396d,mes-MIR396f,mes-MIR396e,mes-MIR396c,vvi-MIR396b,vvi-MIR396a,nta-MIR396c,nta-MIR396b,csi-MIR396c,csi-MIR396f,csi-MIR396d,lus-MIR396e,lus-MIR396b,cme-MIR396c,cme-…	mtr-MIR396a	tgcttTTCCACAGCTTTCTTGAACTTctttcgtatcttaaatctgttttcaagattaaaagtcctagaaGCTCAAGAAAGCTGTGGGAGAata	mtr-miR396a-3p	GCTCAAGAAAGCTGTGGGAGA	3'	Diff	gp2a	...((..(((((.....(((((..(((((((((((((((((((.(((((((...(((....)))............((((...(((......)))...))))..))))))).)))))))))))))))))))..)))))...)))))..))...	147	39.9	-55.7	0.9	498.5	410	407.5	717.5	353.5	71.5	65	124	1045	431	201.5	276.5	209	569	792.5	319	545.5	348	165.5	142	211	425	497	688.5	251	178.5
104	110	gma-miR396a-5p_1ss21GA	TTCCACAGCTTTCTTGAACTA	21	arahy.Tifrunner.gnm1.Arahy.11	-	145492393	145492518	catggccctctttgtattcTTCCACAGCTTTCTTGAACTGcatctaattgttgcatgcatgccatggcactcttcttcttgcgttgcggttcAATAAAGCTGTGGGAAGATACagatagggtcaaa	29	gma-MIR396i,gma-MIR396a,aau-MIR396,amg-MIR396,ptc-MIR396b,ptc-MIR396a,ath-MIR396a,mdm-MIR396b,mdm-MIR396a,aly-MIR396a,ppe-MIR396a,mes-MIR396a,mes-MIR396b,vvi-MIR396d,vvi-MIR396a,csi-MIR396b,lus-MIR396c,lus-MIR396a,cme-MIR396e,cme-MIR396b,fve-MIR396c,fve-MIR396a,sly-MIR396a,cas-MIR396a,ghr-MIR396b,ghr-MIR396a,aqc-MIR396a,eun-MIR396a,hbr-MIR396b,	gma-MIR396a	tcatggctctctttgtattcTTCCACAGCTTTCTTGAACTGcatccaaagagttcctttgcatgcatgccatggcactcttactcccaaatcttgttttgcggTTCAATAAAGCTGTGGGAAGatacagatagggtcaac	gma-miR396a-5p	TTCCACAGCTTTCTTGAACTG	5'	Diff	gp2a	..(((((((.(((((((..((((((((((((.((((((((((............((((((((....)))..........))))))))))))))).))))))))))))..))))))).)))))))..	122	44.4	-59	1.1	52	4	11.5	8	9.5	2.5	5	3.5	11	2.5	8.5	5	3	5	5	39.5	12.5	53	47.5	77.5	74.5	12.5	123	12	27	37.5
104	111	gma-MIR396i-p3	AATAAAGCTGTGGGAAGATAC	21	arahy.Tifrunner.gnm1.Arahy.11	-	145492393	145492518	catggccctctttgtattcTTCCACAGCTTTCTTGAACTGcatctaattgttgcatgcatgccatggcactcttcttcttgcgttgcggttcAATAAAGCTGTGGGAAGATACagatagggtcaaa	29	gma-MIR396i,gma-MIR396a,aau-MIR396,amg-MIR396,ptc-MIR396b,ptc-MIR396a,ath-MIR396a,mdm-MIR396b,mdm-MIR396a,aly-MIR396a,ppe-MIR396a,mes-MIR396a,mes-MIR396b,vvi-MIR396d,vvi-MIR396a,csi-MIR396b,lus-MIR396c,lus-MIR396a,cme-MIR396e,cme-MIR396b,fve-MIR396c,fve-MIR396a,sly-MIR396a,cas-MIR396a,ghr-MIR396b,ghr-MIR396a,aqc-MIR396a,eun-MIR396a,hbr-MIR396b,	gma-MIR396i	tggccctctttgtattcTTCCACAGCTTTCTTGAACTGcatccatagagttcctttgcatgcatgccaaggcactcttgctcccacaccttgttttgcggTTCAATAAAGCTGTGGGAAGatacagatagggtca	gma-MIR396i-p3	AATAAAGCTGTGGGAAGatac	3'	New	gp2a	..(((((((.(((((((..((((((((((((.((((((((((............((((((((....)))..........))))))))))))))).))))))))))))..))))))).)))))))..	122	44.4	-59	1.1	76	41.5	99.5	114	47.5	4	0	17	108.5	41	21	24	21	56.5	113	51.5	101	62	22	26.5	34	56	72.5	57.5	32	19
105	111	gma-MIR396i-p3	AATAAAGCTGTGGGAAGATAC	21	arahy.Tifrunner.gnm1.Arahy.01	+	98773968	98774095	atatggccctctttgtattcttccacagctttcttgaactgcatctaattgttgcatgcatgccatggcactcttcttcttgcgttgcggttcAATAAAGCTGTGGGAAGATACagatagggtcaaac	27	gma-MIR396i,gma-MIR396a,aau-MIR396,amg-MIR396,ptc-MIR396b,ptc-MIR396a,ath-MIR396a,mdm-MIR396b,mdm-MIR396a,aly-MIR396a,mes-MIR396a,mes-MIR396b,vvi-MIR396d,csi-MIR396b,lus-MIR396c,lus-MIR396a,cme-MIR396e,cme-MIR396b,fve-MIR396c,fve-MIR396a,sly-MIR396a,cas-MIR396a,ghr-MIR396b,ghr-MIR396a,aqc-MIR396a,eun-MIR396a,hbr-MIR396b,	gma-MIR396i	tggccctctttgtattcTTCCACAGCTTTCTTGAACTGcatccatagagttcctttgcatgcatgccaaggcactcttgctcccacaccttgttttgcggTTCAATAAAGCTGTGGGAAGatacagatagggtca	gma-MIR396i-p3	AATAAAGCTGTGGGAAGatac	3'	New	gp2a	...(((((((.(((((((..((((((((((((.((((((((((............((((((((....)))..........))))))))))))))).))))))))))))..))))))).)))))))...	122	43.8	-59	1.1	76	41.5	99.5	114	47.5	4	0	17	108.5	41	21	24	21	56.5	113	51.5	101	62	22	26.5	34	56	72.5	57.5	32	19
106	112	gma-miR396a-5p_R+1_1ss21GT	TTCCACAGCTTTCTTGAACTTT	22	arahy.Tifrunner.gnm1.Arahy.08	-	47409679	47409787	tttgaaagatcttgttcatgatcTTCCACAGCTTTCTTGAACTGTatgtatgtatttatgtgtatagttcaagaaaactgtgaaaaatcaagggcatgatctcttcctt	20	gma-MIR396e,gma-MIR396h,ath-MIR396b,mdm-MIR396a,aly-MIR396b,ppe-MIR396a,mes-MIR396d,mes-MIR396e,vvi-MIR396c,csi-MIR396a,lus-MIR396e,lus-MIR396b,cme-MIR396d,fve-MIR396d,bra-MIR396,bna-MIR396a,cas-MIR396b,cca-MIR396a,cca-MIR396c,aqc-MIR396b,	gma-MIR396h	gaatggtctttttcgtgatcTTCCACAGCTTTCTTGAACTGtgttgtgtgaggtttctccaagtgaaggtttaagatcccttatgcaacataaattctttgagcacaATTCAAGATAGCTGTGGAAAAtcactgagatgatctcgttc	gma-miR396a-5p	TTCCACAGCTTTCTTGAACTG	5'	Diff	gp2a	...((((((((.((..(.((((.((.(((((.((((((((((((((..((((....))))..)))))))))))))).))))).)).)))).)..)).))))).)))...	103	33	-46	1.3	49.5	30.5	34.5	56.5	46.5	7.5	4.5	14.5	53.5	28.5	41.5	22	23	29.5	56.5	25	38	33	21	34	37.5	30	58	51.5	18.5	21.5
107	112	gma-miR396a-5p_R+1_1ss21GT	TTCCACAGCTTTCTTGAACTTT	22	arahy.Tifrunner.gnm1.Arahy.18	-	130626099	130626207	tttgaaagatcttgttcatgatcTTCCACAGCTTTCTTGAACTGTatgtatgtatttatgtgtatagttcaagaaaactgtgaaaaatcaagggcatgatctcttcctt	20	gma-MIR396e,gma-MIR396h,ath-MIR396b,mdm-MIR396a,aly-MIR396b,mes-MIR396d,mes-MIR396e,vvi-MIR396c,vvi-MIR396a,csi-MIR396a,lus-MIR396e,lus-MIR396b,cme-MIR396d,fve-MIR396d,bra-MIR396,bna-MIR396a,cas-MIR396b,cca-MIR396a,cca-MIR396c,aqc-MIR396b,	gma-MIR396h	gaatggtctttttcgtgatcTTCCACAGCTTTCTTGAACTGtgttgtgtgaggtttctccaagtgaaggtttaagatcccttatgcaacataaattctttgagcacaATTCAAGATAGCTGTGGAAAAtcactgagatgatctcgttc	gma-miR396a-5p	TTCCACAGCTTTCTTGAACTG	5'	Diff	gp2a	...((((((((.((..(.((((.((.(((((.((((((((((((((..((((....))))..)))))))))))))).))))).)).)))).)..)).))))).)))...	103	33	-46	1.3	49.5	30.5	34.5	56.5	46.5	7.5	4.5	14.5	53.5	28.5	41.5	22	23	29.5	56.5	25	38	33	21	34	37.5	30	58	51.5	18.5	21.5
108	113	mtr-miR397-5p	TCATTGAGTGCAGCGTTGATG	21	arahy.Tifrunner.gnm1.Arahy.03	+	126423790	126423909	agctcccacactagaaaagcaTCATTGAGTGCAGCGTTGATGcaaactccagctcagttccttccttgttattgccaTTGACGCTGCATTCAATCATGtttttttggtaatacgggatta	23	mtr-MIR397,gma-MIR397a,gma-MIR397b,ptc-MIR397a,ath-MIR397a,mdm-MIR397a,mdm-MIR397b,aly-MIR397a,aly-MIR397b,ppe-MIR397,mes-MIR397b,vvi-MIR397a,nta-MIR397,csi-MIR397,lus-MIR397b,cme-MIR397,fve-MIR397,bna-MIR397a,bna-MIR397b,cas-MIR397,rco-MIR397,eun-MIR397a,ssl-MIR397,	mtr-MIR397	ttggagaaacaTCATTGAGTGCAGCGTTGATGaaatcttatgtagcatctagctatcttatagatatcaaatattgcatgcttaatttcaTCTACGCTACACTCAATTATGtttttttaa	mtr-miR397-5p	TCATTGAGTGCAGCGTTGATG	5'	Yes	gp2a	...((((..(((((((((((((.((((((((((((((..((((((((....................))..))).)))..)))))))))))))).))))))))))))).....))))...	114	42.5	-47.5	0.9	171	23	34	39	50	53	45	123	50	41	94	62	40	12	42	17	123.5	22	79	56	31	58	64	47	36	25
108	114	gma-MIR397b-p3_1ss12CT	TTGACGCTGCATTCAATCATG	21	arahy.Tifrunner.gnm1.Arahy.03	+	126423790	126423909	agctcccacactagaaaagcaTCATTGAGTGCAGCGTTGATGcaaactccagctcagttccttccttgttattgccaTTGACGCTGCATTCAATCATGtttttttggtaatacgggatta	23	mtr-MIR397,gma-MIR397a,gma-MIR397b,ptc-MIR397a,ath-MIR397a,mdm-MIR397a,mdm-MIR397b,aly-MIR397a,aly-MIR397b,ppe-MIR397,mes-MIR397b,vvi-MIR397a,nta-MIR397,csi-MIR397,lus-MIR397b,cme-MIR397,fve-MIR397,bna-MIR397a,bna-MIR397b,cas-MIR397,rco-MIR397,eun-MIR397a,ssl-MIR397,	gma-MIR397b	ggagaaacaTCATTGAGTGCAGCGTTGATGaagtcctaaatagtaaatagcaactacccctcgtgtttctcaggtagatgcttaaatggtttTATTGACGCTGCACTCAATCAtgttttttt	gma-MIR397b-p3	TTGACGCTGCACTCAATCAtg	3'	New	gp2a	...((((..(((((((((((((.((((((((((((((..((((((((....................))..))).)))..)))))))))))))).))))))))))))).....))))...	114	42.5	-47.5	0.9	2.5	0	0	0	0	0	0	0	0	0	0	0	0	0	0	0	3	0	0	0	0	0	0	0	0	0
109	115	mtr-miR397-5p_1ss21GT	TCATTGAGTGCAGCGTTGATT	21	arahy.Tifrunner.gnm1.Arahy.12	-	117036643	117036747	cacactagaaaagcaTCATTGAGTGCAGCGTTGATGcaaattccagctcagttccttccttgttattgccaTTGACGCTGCATTCAATCATGtttttttggtaat	23	mtr-MIR397,gma-MIR397a,gma-MIR397b,ptc-MIR397a,ath-MIR397a,mdm-MIR397a,mdm-MIR397b,aly-MIR397a,aly-MIR397b,ppe-MIR397,mes-MIR397b,vvi-MIR397a,nta-MIR397,csi-MIR397,lus-MIR397b,cme-MIR397,fve-MIR397,bna-MIR397a,bna-MIR397b,cas-MIR397,rco-MIR397,eun-MIR397a,ssl-MIR397,	mtr-MIR397	ttggagaaacaTCATTGAGTGCAGCGTTGATGaaatcttatgtagcatctagctatcttatagatatcaaatattgcatgcttaatttcaTCTACGCTACACTCAATTATGtttttttaa	mtr-miR397-5p	TCATTGAGTGCAGCGTTGATG	5'	Diff	gp2a	...(((((((((((((.((((((((((((((..(((..(((..(((.............)))..)))..)))..)))))))))))))).)))))))))))))...	99	40	-43.4	1	19	0	0	0	0	0	0	0	0	0	5	0	0	0	0	0	12.5	0	6	0	0	0	6	0	0	0
109	114	gma-MIR397b-p3_1ss12CT	TTGACGCTGCATTCAATCATG	21	arahy.Tifrunner.gnm1.Arahy.12	-	117036643	117036747	cacactagaaaagcaTCATTGAGTGCAGCGTTGATGcaaattccagctcagttccttccttgttattgccaTTGACGCTGCATTCAATCATGtttttttggtaat	23	mtr-MIR397,gma-MIR397a,gma-MIR397b,ptc-MIR397a,ath-MIR397a,mdm-MIR397a,mdm-MIR397b,aly-MIR397a,aly-MIR397b,ppe-MIR397,mes-MIR397b,vvi-MIR397a,nta-MIR397,csi-MIR397,lus-MIR397b,cme-MIR397,fve-MIR397,bna-MIR397a,bna-MIR397b,cas-MIR397,rco-MIR397,eun-MIR397a,ssl-MIR397,	gma-MIR397b	ggagaaacaTCATTGAGTGCAGCGTTGATGaagtcctaaatagtaaatagcaactacccctcgtgtttctcaggtagatgcttaaatggtttTATTGACGCTGCACTCAATCAtgttttttt	gma-MIR397b-p3	TTGACGCTGCACTCAATCAtg	3'	New	gp2a	...(((((((((((((.((((((((((((((..(((..(((..(((.............)))..)))..)))..)))))))))))))).)))))))))))))...	99	40	-43.4	1	2.5	0	0	0	0	0	0	0	0	0	0	0	0	0	0	0	3	0	0	0	0	0	0	0	0	0
110	116	mtr-miR398b	TGTGTTCTCAGGTCGCCCCTG	21	arahy.Tifrunner.gnm1.Arahy.07	-	4028444	4028510	tgactgtggtttgatctgagagcttacattgctcatatcaTGTGTTCTCAGGTCGCCCCTGcgggac	20	mtr-MIR398c,mtr-MIR398b,gma-MIR398d,gma-MIR398c,ptc-MIR398c,ptc-MIR398b,mdm-MIR398b,mdm-MIR398c,ppe-MIR398a,mes-MIR398,vvi-MIR398b,vvi-MIR398c,nta-MIR398,csi-MIR398b,lus-MIR398a,cme-MIR398a,cpa-MIR398,rco-MIR398b,cca-MIR398,aqc-MIR398b,	mtr-MIR398b	ttctacagggtcgacatgagaccacatgaagctatcatatttgtctatgttatccaactcaTGTGTTCTCAGGTCGCCCCTGctgaa	mtr-miR398b	TGTGTTCTCAGGTCGCCCCTG	3'	Yes	gp2a	...((((((..((((((((((((..((((..........))))))))))))))))..)).))))...	61	50.7	-24.5	0.7	201	30	49	51	68	60	66	148	72	51	64	86	48	17	47	17	128	31	159	76	57	76	69	52	53	55
111	117	mdm-miR477b_R-1_2ss1AT20GC	TCTCTCCCTCAAGGGCTTCCA	21	arahy.Tifrunner.gnm1.Arahy.03	-	100376106	100376207	cgtgtagcattcattactcTCTCTCCCTCAAGGGCTTCCAaattgcttcccatgaaacaagtttgaggcctttttgggagggagtatagtgtttgttacttc	10	gma-MIR5036,mdm-MIR477b,mes-MIR477i,mes-MIR477d,nta-MIR477b,csi-MIR477b,fve-MIR11312,fve-MIR477a,aqc-MIR477e,aqc-MIR477b,	mdm-MIR477b	caaggcatttttgttgctcACTCTCCCTCAAGGGCTTCGACcaatgtcagacatgrcgagctcgaagacttggggagagtgaataaaaagtgtcttg	mdm-miR477b	ACTCTCCCTCAAGGGCTTCGAC	5'	Diff	gp2a	...((((((..(((((..(((((((((..(((((((((.((.(((.(((....))).))).)).)))))))))..)))))))))..)))))..))))))...	96	44.1	-46.3	1	5.5	7	5.5	3.5	0	2.5	0	0	10	4	0	0	0	0	3	4.5	0	0	0	0	0	6.5	3	8	0	0
112	117	mdm-miR477b_R-1_2ss1AT20GC	TCTCTCCCTCAAGGGCTTCCA	21	arahy.Tifrunner.gnm1.Arahy.13	-	101648517	101648618	cgtgtagcattcattactcTCTCTCCCTCAAGGGCTTCCAaattgcttcccatgaaacaagtttgaggcctttttgggagggagtatagtgtttgttacttc	10	gma-MIR5036,mdm-MIR477b,mes-MIR477i,mes-MIR477d,nta-MIR477b,csi-MIR477b,fve-MIR477a,fve-MIR11312,aqc-MIR477e,aqc-MIR477b,	mdm-MIR477b	caaggcatttttgttgctcACTCTCCCTCAAGGGCTTCGACcaatgtcagacatgrcgagctcgaagacttggggagagtgaataaaaagtgtcttg	mdm-miR477b	ACTCTCCCTCAAGGGCTTCGAC	5'	Diff	gp2a	...((((((..(((((..(((((((((..(((((((((.((.(((.(((....))).))).)).)))))))))..)))))))))..)))))..))))))...	96	44.1	-46.3	1	5.5	7	5.5	3.5	0	2.5	0	0	10	4	0	0	0	0	3	4.5	0	0	0	0	0	6.5	3	8	0	0
113	118	mes-MIR482b-p5_1ss1GA	AGAAGTTGTAGGAATGGGCGG	21	arahy.Tifrunner.gnm1.Arahy.15	+	153382651	153382815	aaaattataaggaggagagtaaggaatgagagattgagctattAGAAGTTGTAGGAATGGGCGGtttgggatgagtctagtcggataggtatcTTCCCAAAGCCGCCCATTCCGAtgatttctagtggttcttctcttttccttttctttctatttattaataca	4	ppe-MIR482c,mes-MIR482b,eun-MIR482c,hbr-MIR482b,	mes-MIR482b	agatagagagctactggaagttgtaggaatgggcggtttgggaaaaaatcatatacataaatacgataacagattacgtcgaaaatcaaattaagtgtatacaagttttcTTCCCAATGTCGCCCATTCCGAtgatttccagaagctcctccctttc	mes-MIR482b-p5	ggaagttgtaggaatgggcgg	5'	New	gp2a	...((((((((..((((((.((((((.((((((..((((((((((((((..(.((((((((((((((((((.((..(((......)))...)).)))).)))))))))))))).)..)))))))))))))).))))))))))))..)))))).))))).)))...	159	38.8	-78.6	1.2	0	3	3	12.5	9	0	0	0	9	6	0	0	0	3	10.5	0	3	0	0	0	0	2.5	0	9.5	3	0
113	119	mes-miR482b_2ss8TA10TC	TTCCCAAAGCCGCCCATTCCGA	22	arahy.Tifrunner.gnm1.Arahy.15	+	153382651	153382815	aaaattataaggaggagagtaaggaatgagagattgagctattAGAAGTTGTAGGAATGGGCGGtttgggatgagtctagtcggataggtatcTTCCCAAAGCCGCCCATTCCGAtgatttctagtggttcttctcttttccttttctttctatttattaataca	4	ppe-MIR482c,mes-MIR482b,eun-MIR482c,hbr-MIR482b,	mes-MIR482b	agatagagagctactggaagttgtaggaatgggcggtttgggaaaaaatcatatacataaatacgataacagattacgtcgaaaatcaaattaagtgtatacaagttttcTTCCCAATGTCGCCCATTCCGAtgatttccagaagctcctccctttc	mes-miR482b	TTCCCAATGTCGCCCATTCCGA	3'	Diff	gp2a	...((((((((..((((((.((((((.((((((..((((((((((((((..(.((((((((((((((((((.((..(((......)))...)).)))).)))))))))))))).)..)))))))))))))).))))))))))))..)))))).))))).)))...	159	38.8	-78.6	1.2	7	0	8	16	7	0	0	0	5	5	6	0	5	0	10	0	7	8	0	0	0	9	6	11	8	0
114	118	mes-MIR482b-p5_1ss1GA	AGAAGTTGTAGGAATGGGCGG	21	arahy.Tifrunner.gnm1.Arahy.05	-	91294830	91294989	aattataaggaggagagtaaggaatgagagattgaactattAGAAGTTGTAGGAATGGGCGGtttgggatgagtctagtcgaataggtgtcttcccaaaaccgcccattccaataatttctagtggttcttctcttttccttttctttctatttgtatat	4	ppe-MIR482c,mes-MIR482b,eun-MIR482c,hbr-MIR482b,	mes-MIR482b	agatagagagctactggaagttgtaggaatgggcggtttgggaaaaaatcatatacataaatacgataacagattacgtcgaaaatcaaattaagtgtatacaagttttcTTCCCAATGTCGCCCATTCCGAtgatttccagaagctcctccctttc	mes-MIR482b-p5	ggaagttgtaggaatgggcgg	5'	New	gp2a	...((((((..((((((.((((((.((((((..(((((((((((((((((.((((((((((((((((((.((..(((......)))...)).)))).)))))))))))))).))))))))))))))))).))))))))))))..)))))).))))))...	154	37.5	-79.9	1.3	0	3	3	12.5	9	0	0	0	9	6	0	0	0	3	10.5	0	3	0	0	0	0	2.5	0	9.5	3	0
115	120	mtr-miR530_1ss21CA	TGCATTTGCACCTGCACTTTA	21	arahy.Tifrunner.gnm1.Arahy.08	+	29307939	29308103	atataacacatgaagaaactggttcatggcaaaagccaatatgtcgcctttatcTGCATTTGCACCTGCACTTTActtggttttctcaagaagggaggaactgagaagaggtgcaggtacatctgcaggtgaatgccatgttggctgctacttctgatgttgctg	18	mtr-MIR530,gma-MIR530a,gma-MIR530b,gma-MIR530e,gma-MIR530d,gma-MIR530c,ptc-MIR530a,mdm-MIR530b,mdm-MIR530a,mdm-MIR530c,gra-MIR530a,gra-MIR530b,ppe-MIR530,mes-MIR530b,csi-MIR530a,fve-MIR530,sly-MIR530,eun-MIR530,	mtr-MIR530	agcttttatcTGCATTTGCACCTGCACTTTCcctggctgcgtctgtaacatataaacatgtgaattaatttgttttatatataaaataaaataaatttataatatttagtatgaggaaggaccaagggctaggtgcagatgcatatgcagatgaatgcc	mtr-miR530	TGCATTTGCACCTGCACTTTC	5'	Diff	gp2a	...(((((((.((((...........((((...((((((((((..((.((((((((((..((.(((((((((((.((..((((((((.....)))).))))..))..))))))))))).))..)))))))))).)))))))))))))))))))))).)))))...	159	44.2	-67	0.9	4.5	7	4.5	7	4	0	0	2.5	14.5	6	3	3.5	3	0	3	0	5.5	0	0	0	0	7	5.5	9.5	0	0
116	120	mtr-miR530_1ss21CA	TGCATTTGCACCTGCACTTTA	21	arahy.Tifrunner.gnm1.Arahy.18	+	5084152	5084301	actggttcatggcaaaagccaatatgtcgcctttatcTGCATTTGCACCTGCACTTTActtggttttctcaagaagggaggaactgagaagaggtgcaggtacatctgcaggtgaatgccatgttggctgctacttctcatgttgctgaa	18	mtr-MIR530,gma-MIR530e,gma-MIR530a,gma-MIR530d,gma-MIR530c,gma-MIR530b,ptc-MIR530a,mdm-MIR530b,mdm-MIR530a,mdm-MIR530c,gra-MIR530a,gra-MIR530b,ppe-MIR530,mes-MIR530b,csi-MIR530a,fve-MIR530,sly-MIR530,eun-MIR530,	mtr-MIR530	agcttttatcTGCATTTGCACCTGCACTTTCcctggctgcgtctgtaacatataaacatgtgaattaatttgttttatatataaaataaaataaatttataatatttagtatgaggaaggaccaagggctaggtgcagatgcatatgcagatgaatgcc	mtr-miR530	TGCATTTGCACCTGCACTTTC	5'	Diff	gp2a	...(((.(((((....((((((((((..((.((((((((((..((.(((((((((((.((..((((((((.....)))).))))..))..))))))))))).))..)))))))))).))))))))))))........)))))..)))...	144	46	-63.9	0.9	4.5	7	4.5	7	4	0	0	2.5	14.5	6	3	3.5	3	0	3	0	5.5	0	0	0	0	7	5.5	9.5	0	0
117	121	ath-MIR835-p3_2ss1CT19TA	TTGGATTTGTTTGATGGTA	19	arahy.Tifrunner.gnm1.Arahy.02	+	80531978	80532128	cctacctttcgtgtatgttagaataaagtggctatggttttttattttacctcaggcaaatccaattgttgctataTTGGATTTGTTTGATGGTAtgttaagctaaggttgctttaatttgttatctattactactatatggtttggtttg	1	ath-MIR835,	ath-MIR835	tgctcgattcttcagatagaaattctggtcatctttgtgtttaggctttTTCTTGCATATGTTCTTTATCtctattgattgatattgttcaatgagcaacatacttttctcttctacctggatttgtttgatggttttaagaactctgttctttttgacgttttacccaacaatataacttctgttgtagtcatcttctgctgcaacccatccacaaagcttatcatgcaagattaaaccctttctcgatgggttgcaagagaacatcactaaaatagaagtaacattgttggggaaaaacgtcacaaatccaggtattagagaataggatgctgatcgttgaaaataactatctataaagaTGGAGAAGATACGCAAGAAAGagttgtaaacacaaagc	ath-MIR835-p3	ctggatttgtttgatggtt	3'	New	gp2a	...(((..(((((((.((((((.(((((..((..((((((..((...(((((((..((((((((((.........))))))))))..))).))))))..))))))..))..))))).))))............)))))))))...)))...	145	31.8	-43.2	0.9	6	0	0	0	0	0	0	0	0	0	0	0	0	0	12	0	0	0	0	0	0	0	0	0	0	0
118	122	mtr-miR1507-5p_R-1_2ss5TA18AG	AGAGATGTATGGAACGAGAGA	21	arahy.Tifrunner.gnm1.Arahy.01	+	97766104	97766235	tctgttggcgcgctgtttggtAGAGATGTATGGAACGAGAGAtgggaacggtgggtggtggttttttccaccgagttcctttacttccctcCCTCGTTCCATACATCATCTAAcaaacacggtgttaattaa	4	mtr-MIR1507,gma-MIR1507c,lja-MIR1507a,lja-MIR1507b,	mtr-MIR1507	accataaactccaattaatgtggtgttgagtAGAGTTGTATGGAACGAAAGATgggaatttcttgttgaattctattcattcaattttccctcCCTCGTTCCATACATCATCTAGccaatactgtgttaacaattgtctttggt	mtr-miR1507-5p	AGAGTTGTATGGAACGAAAGAT	5'	Diff	gp2a	...(((..(((..((((((.(((((((((((((((((((.((.(((((....(((((((((......))))))....)))....))))))).))))))))))))))).)))).))))))..)))..)))...	126	47	-62.9	1	573	474.5	630.5	784.5	518	117.5	67	210.5	1416	520.5	262.5	362	398.5	1284.5	1303.5	714.5	854.5	739.5	229	177.5	417.5	639.5	727.5	1252	424	318
118	123	mtr-miR1507-3p_1ss22GA	CCTCGTTCCATACATCATCTAA	22	arahy.Tifrunner.gnm1.Arahy.01	+	97766104	97766235	tctgttggcgcgctgtttggtAGAGATGTATGGAACGAGAGAtgggaacggtgggtggtggttttttccaccgagttcctttacttccctcCCTCGTTCCATACATCATCTAAcaaacacggtgttaattaa	4	mtr-MIR1507,gma-MIR1507c,lja-MIR1507a,lja-MIR1507b,	mtr-MIR1507	accataaactccaattaatgtggtgttgagtAGAGTTGTATGGAACGAAAGATgggaatttcttgttgaattctattcattcaattttccctcCCTCGTTCCATACATCATCTAGccaatactgtgttaacaattgtctttggt	mtr-miR1507-3p	CCTCGTTCCATACATCATCTAG	3'	Diff	gp2a	...(((..(((..((((((.(((((((((((((((((((.((.(((((....(((((((((......))))))....)))....))))))).))))))))))))))).)))).))))))..)))..)))...	126	47	-62.9	1	3937.5	3261	4767	5090	3463.5	709	547.5	1183	7499	3228	1951	2273	2642	2913	3836	1796.5	3457.5	2909	1289.5	1230.5	1278.5	3913.5	3168	5210.5	1764	1743
119	122	mtr-miR1507-5p_R-1_2ss5TA18AG	AGAGATGTATGGAACGAGAGA	21	arahy.Tifrunner.gnm1.Arahy.11	-	146531205	146531385	accgaaaccctagatccatgctctctgttgacgcgctgtttggtAGAGATGTATGGAACGAGAGAtgggaacggtgggtggtggttttttccaccgagttcctttacttccctCCCTCGTTCCATACATCATCTAacaaacacggtgttaattaataagttatatgggatccggttttctt	4	mtr-MIR1507,gma-MIR1507c,lja-MIR1507a,lja-MIR1507b,	mtr-MIR1507	accataaactccaattaatgtggtgttgagtAGAGTTGTATGGAACGAAAGATgggaatttcttgttgaattctattcattcaattttccctcCCTCGTTCCATACATCATCTAGccaatactgtgttaacaattgtctttggt	mtr-miR1507-5p	AGAGTTGTATGGAACGAAAGAT	5'	Diff	gp2a	...((((((...(((((..(((....((((((((..((((((.(((((((((((((((((((.((.(((((....(((((((((......))))))....)))....))))))).))))))))))))))).)))).))))))..)))))))).....)))......))))).))))))...	175	45.3	-77.8	0.9	573	474.5	630.5	784.5	518	117.5	67	210.5	1416	520.5	262.5	362	398.5	1284.5	1303.5	714.5	854.5	739.5	229	177.5	417.5	639.5	727.5	1252	424	318
119	124	mtr-miR1507-3p_L+1R-1	CCCTCGTTCCATACATCATCTA	22	arahy.Tifrunner.gnm1.Arahy.11	-	146531205	146531385	accgaaaccctagatccatgctctctgttgacgcgctgtttggtAGAGATGTATGGAACGAGAGAtgggaacggtgggtggtggttttttccaccgagttcctttacttccctCCCTCGTTCCATACATCATCTAacaaacacggtgttaattaataagttatatgggatccggttttctt	4	mtr-MIR1507,gma-MIR1507c,lja-MIR1507a,lja-MIR1507b,	mtr-MIR1507	accataaactccaattaatgtggtgttgagtAGAGTTGTATGGAACGAAAGATgggaatttcttgttgaattctattcattcaattttccctcCCTCGTTCCATACATCATCTAGccaatactgtgttaacaattgtctttggt	mtr-miR1507-3p	CCTCGTTCCATACATCATCTAG	3'	Diff	gp2a	...((((((...(((((..(((....((((((((..((((((.(((((((((((((((((((.((.(((((....(((((((((......))))))....)))....))))))).))))))))))))))).)))).))))))..)))))))).....)))......))))).))))))...	175	45.3	-77.8	0.9	1343.5	1027	1586	1584	1139.5	219	169.5	348	2796	906	563	784	837	778	1028	482.5	1114.5	871	440.5	395.5	445.5	1451.5	1061	1581.5	587	571
120	125	gma-MIR1507a-p5_2ss14GA20GA	AGAGGTGTATGGAATGAGAAA	21	arahy.Tifrunner.gnm1.Arahy.01	+	97768167	97768286	ttgtgagtactatgtttggtAGAGGTGTATGGAATGAAAAAtgggaagggcgttttcggttgagttcatgaacttcctcttTTTCATTCCATACATCATCTatctaacattgtcttaata	10	mtr-MIR1507,gma-MIR1507c,gma-MIR1507b,gso-MIR1507b,gma-MIR1507a,lja-MIR1507a,lja-MIR1507b,vun-MIR1507b,vun-MIR1507a,gso-MIR1507a,	gma-MIR1507a	cagtgtttggcagaggtgtatggagtgagagaagggaaagggtattttccgattctgtcgttactctcttccctcTCTCATTCCATACATCGTCTGAcgaacgtatc	gma-MIR1507a-p5	agaggtgtatggagtgagaga	5'	New	gp2a	...((((.((.(((((.((((((((((((((((((((((((..(((((..(((.(((....)))...)))..)))))..)))))))))))))))))).)))))).))))).))))))...	114	35.8	-51.9	1.2	166.5	87	171.5	309	177.5	22	11.5	42.5	283	119	59.5	86.5	63	220.5	259	118.5	182.5	120	53.5	54	80.5	137	164	151	87	75
120	126	gma-MIR1507b-p3_2ss2CT17GA	TTTCATTCCATACATCATCT	20	arahy.Tifrunner.gnm1.Arahy.01	+	97768167	97768286	ttgtgagtactatgtttggtAGAGGTGTATGGAATGAAAAAtgggaagggcgttttcggttgagttcatgaacttcctcttTTTCATTCCATACATCATCTatctaacattgtcttaata	10	mtr-MIR1507,gma-MIR1507c,gma-MIR1507b,gso-MIR1507b,gma-MIR1507a,lja-MIR1507a,lja-MIR1507b,vun-MIR1507b,vun-MIR1507a,gso-MIR1507a,	gma-MIR1507b	gtttgacagagatgtatggagtgagagaagggaaatgatattttccgatcccatcgttactctcttccctcTCTCATTCCATACATCGTCTGAcgaac	gma-MIR1507b-p3	TCTCATTCCATACATCGTCT	3'	New	gp2a	...((((.((.(((((.((((((((((((((((((((((((..(((((..(((.(((....)))...)))..)))))..)))))))))))))))))).)))))).))))).))))))...	114	35.8	-51.9	1.2	10	6	13.5	17	10.5	0	0	0	31.5	4.5	0	7.5	2.5	16.5	13	7	10	7	6.5	0	0	20.5	14	35.5	3	2.5
121	125	gma-MIR1507a-p5_2ss14GA20GA	AGAGGTGTATGGAATGAGAAA	21	arahy.Tifrunner.gnm1.Arahy.11	-	146528542	146528652	agtactatgtttggtAGAGGTGTATGGAATGAGAAAtgggaagggcgttttcggttgacttcatgaacttccccttTTTCATTCCATACATCATCTatctaacattgtctt	10	mtr-MIR1507,gma-MIR1507c,gma-MIR1507a,gma-MIR1507b,gso-MIR1507b,lja-MIR1507a,lja-MIR1507b,vun-MIR1507b,vun-MIR1507a,gso-MIR1507a,	gma-MIR1507a	cagtgtttggcagaggtgtatggagtgagagaagggaaagggtattttccgattctgtcgttactctcttccctcTCTCATTCCATACATCGTCTGAcgaacgtatc	gma-MIR1507a-p5	agaggtgtatggagtgagaga	5'	New	gp2a	((.((.(((((.((((((((((((((((((((((((.((((((..(((....((....))..)))..)))))).)))))))))))))))))).)))))).))))).)))).	110	38.7	-50.8	1.2	166.5	87	171.5	309	177.5	22	11.5	42.5	283	119	59.5	86.5	63	220.5	259	118.5	182.5	120	53.5	54	80.5	137	164	151	87	75
121	127	gma-MIR1507a-p3_2ss2CT17GA	TTTCATTCCATACATCATCT	20	arahy.Tifrunner.gnm1.Arahy.11	-	146528542	146528652	agtactatgtttggtAGAGGTGTATGGAATGAGAAAtgggaagggcgttttcggttgacttcatgaacttccccttTTTCATTCCATACATCATCTatctaacattgtctt	10	mtr-MIR1507,gma-MIR1507c,gma-MIR1507a,gma-MIR1507b,gso-MIR1507b,lja-MIR1507a,lja-MIR1507b,vun-MIR1507b,vun-MIR1507a,gso-MIR1507a,	gma-MIR1507a	cagtgtttggcagaggtgtatggagtgagagaagggaaagggtattttccgattctgtcgttactctcttccctcTCTCATTCCATACATCGTCTGAcgaacgtatc	gma-MIR1507a-p3	TCTCATTCCATACATCGTCT	3'	New	gp2a	((.((.(((((.((((((((((((((((((((((((.((((((..(((....((....))..)))..)))))).)))))))))))))))))).)))))).))))).)))).	110	38.7	-50.8	1.2	10	6	13.5	17	10.5	0	0	0	31.5	4.5	0	7.5	2.5	16.5	13	7	10	7	6.5	0	0	20.5	14	35.5	3	2.5
122	128	gma-MIR1509b-p5_2ss11AG18GA	TTAATCAAGGGAATCACAGTTG	22	arahy.Tifrunner.gnm1.Arahy.09	+	112546829	112546956	tttgagtataatgattcattccatccttTTAATCAAGGGAATCACAGTTGagttgagtctctctctcgctcagaatctctactgtgttcccttgatcaaatagatgtactggatcacaatcactcctg	3	gma-MIR1509b,gma-MIR1509a,gso-MIR1509a,	gma-MIR1509b	ctgcatctttTTAATCAAGGAAATCACGGTTgagtgtgaaggagagaaagtggcttcagatttccgggttttccttctccactgtgtttccttggttaaagatatgtgc	gma-MIR1509b-p5	TTAATCAAGGAAATCACGGTTg	5'	New	gp2a	...((((((..(((((((...((((..(((.((((((((((.((((((.(((((((((.........))))))...))).)))))))))))))))).)))..))))...)))))))..)).))))...	122	39.1	-47	0.9	7954.5	3953	9100.5	10174	7055	950.5	622	2130	13059.5	4171.5	3963.5	4278.5	4812	5244	9288	4368.5	6976	7366	2198.5	2335.5	2811.5	5231.5	6735.5	11442	4395.5	3805.5
123	128	gma-MIR1509b-p5_2ss11AG18GA	TTAATCAAGGGAATCACAGTTG	22	arahy.Tifrunner.gnm1.Arahy.19	-	155779586	155779701	taatgattcattccatccttTTAATCAAGGGAATCACAGTTGagttgagttgagtctctctcccgctcagaatctctactgtgttcccttgatcaaatagatgtactggatcacaa	3	gma-MIR1509b,gma-MIR1509a,gso-MIR1509a,	gma-MIR1509b	ctgcatctttTTAATCAAGGAAATCACGGTTgagtgtgaaggagagaaagtggcttcagatttccgggttttccttctccactgtgtttccttggttaaagatatgtgc	gma-MIR1509b-p5	TTAATCAAGGAAATCACGGTTg	5'	New	gp2a	...(((((((...((((..(((.((((((((((.((((((.(((((((((.(((.....)))..))))))...))).)))))))))))))))).)))..))))...)))))))...	110	39.7	-47.2	1	7954.5	3953	9100.5	10174	7055	950.5	622	2130	13059.5	4171.5	3963.5	4278.5	4812	5244	9288	4368.5	6976	7366	2198.5	2335.5	2811.5	5231.5	6735.5	11442	4395.5	3805.5
124	129	gma-MIR1511-p5_1	GTGGTATCAGGTCCTGCTTCA	21	arahy.Tifrunner.gnm1.Arahy.03	-	132995686	132995823	gatgcttgggtcgagtggctgctttcGTGGTATCAGGTCCTGCTTCAccaagtgatcttgtgttcaattcccattccaagcacatggttAACCAGGCTCTGATACCATGAtgcgttctcttgcacttcccaaagctta	3	gma-MIR1511,lja-MIR1511,rgl-MIR5139,	gma-MIR1511	tcagccgtggtatcaggtcctgcttcatcaagtggtcttgtgttcaaatccagcctcaagcacatggttAACCAGGCTCTGATACCATGgtgaatataa	gma-MIR1511-p5	gtggtatcaggtcctgcttca	5'	New	gp2a	...(((((((.((((.(..(((..((((((((((((..((((.((.((((.(((..((((................))))))).)))).)).))))..)))))))))))).)))..).)))).....))))).))...	132	48.6	-51.3	0.8	3706	3062	3305	5745	2691	426	427	781	8753	2562	1494	2665	1767	3415	5585	1871	3605	2199	1138	1023	1299	4883	3974	4848	2635	1670
124	130	gma-miR1511_R+1_1	AACCAGGCTCTGATACCATGA	21	arahy.Tifrunner.gnm1.Arahy.03	-	132995686	132995823	gatgcttgggtcgagtggctgctttcGTGGTATCAGGTCCTGCTTCAccaagtgatcttgtgttcaattcccattccaagcacatggttAACCAGGCTCTGATACCATGAtgcgttctcttgcacttcccaaagctta	3	gma-MIR1511,lja-MIR1511,rgl-MIR5139,	gma-MIR1511	tcagccgtggtatcaggtcctgcttcatcaagtggtcttgtgttcaaatccagcctcaagcacatggttAACCAGGCTCTGATACCATGgtgaatataa	gma-miR1511	AACCAGGCTCTGATACCATG	3'	Diff	gp2a	...(((((((.((((.(..(((..((((((((((((..((((.((.((((.(((..((((................))))))).)))).)).))))..)))))))))))).)))..).)))).....))))).))...	132	48.6	-51.3	0.8	62347	52601	65891	88224	58095	10926	9150	16831	121041	43015	29933	43148	36241	62154	81879	35259	71112	49504	30180	25211	31314	74783	63668	92583	39839	35490
125	131	csi-miR1515a_2ss11GA22CA	TCATTTTTGCATGCAATGATCA	22	arahy.Tifrunner.gnm1.Arahy.11	+	14408618	14408750	atagatctgagatcttgcacgcaaaaatgatgtcaattaatgggttctaatttttgcaaacgcatgcagtttcttccaatcgcggaatccattcaattctcaTCATTTTTGCATGCAATGATCCcaattccaa	2	csi-MIR1515a,csi-MIR1515b,	csi-MIR1515a	tcgatttgcaTCATTTTTGCGTGCAATGATCCcgaatttgctctcttactcaactttctttttaatttacaaatattcatgtttattggtttgaaaaatagaaaaaaaaattctaatttttgttaacggggatctggATCATTCACGCAAAAATGATTtgactcgtgagttggc	csi-miR1515a	TCATTTTTGCGTGCAATGATCC	3'	Diff	gp2a	...((..((.(((((((((.((((((((((((..(((((((((((((.......(((....))).((..((......))..)).))))))))).))))..)))))))))))).))))).)))).))..))...	127	36.8	-45.1	0.9	6	0	0	0	0	0	0	0	0	0	0	0	0	0	0	0	0	6	0	0	0	0	5	0	0	0
126	132	mtr-miR2111a-5p_R+3	TAATCTGCATCCTGAGGTTTAGAA	24	arahy.Tifrunner.gnm1.Arahy.04	-	82033748	82033854	tattattgggtcatgatggcgTAATCTGCATCCTGAGGTTTAGAAcaatattttggttgtatctaATCCTTAGGATGCAGATTACGtcttcgttgtcaccaatattt	49	mtr-MIR2111e,mtr-MIR2111a,mtr-MIR2111k,mtr-MIR2111f,mtr-MIR2111b,mtr-MIR2111i,mtr-MIR2111c,mtr-MIR2111d,mtr-MIR2111n,mtr-MIR2111o,mtr-MIR2111j,mtr-MIR2111h,mtr-MIR2111m,mtr-MIR2111g,gma-MIR2111b,gma-MIR2111e,gma-MIR2111a,gma-MIR2111d,gma-MIR2111c,gma-MIR2111f,lja-MIR2111,ptc-MIR2111a,ptc-MIR2111b,ath-MIR2111b,ath-MIR2111a,mdm-MIR2111b,mdm-MIR2111a,aly-MIR2111b,aly-MIR2111a,aly-MIR2111c,ppe-MIR211…	mtr-MIR2111g	atattgggtgaggatgggaTAATCTGCATCCTGAGGTTTAagacaatatttgcgtaatttccaaaaaataaataaattgcgtaatcgtttctaAGCCTCGGAGTGCGGATTATCttttcctatcaccaatgc	mtr-miR2111a-5p	TAATCTGCATCCTGAGGTTTA	5'	Diff	gp2a	...((((((..(((((.(((((((((((((((((((((.((((((((((......))))).))))).))))))))))))))))))))).)))).)...))))))...	101	36.4	-56.1	1.4	5.5	5.5	20	14	8.5	0	0	0	13	5	4.5	8.5	4.5	4	6.5	3	8	5	0	2.5	3	2.5	5.5	9.5	7	3
126	133	gma-miR2111a_2ss1GA7GA	ATCCTTAGGATGCAGATTACG	21	arahy.Tifrunner.gnm1.Arahy.04	-	82033748	82033854	tattattgggtcatgatggcgTAATCTGCATCCTGAGGTTTAGAAcaatattttggttgtatctaATCCTTAGGATGCAGATTACGtcttcgttgtcaccaatattt	49	mtr-MIR2111e,mtr-MIR2111a,mtr-MIR2111k,mtr-MIR2111f,mtr-MIR2111b,mtr-MIR2111i,mtr-MIR2111c,mtr-MIR2111d,mtr-MIR2111n,mtr-MIR2111o,mtr-MIR2111j,mtr-MIR2111h,mtr-MIR2111m,mtr-MIR2111g,gma-MIR2111b,gma-MIR2111e,gma-MIR2111a,gma-MIR2111d,gma-MIR2111c,gma-MIR2111f,lja-MIR2111,ptc-MIR2111a,ptc-MIR2111b,ath-MIR2111b,ath-MIR2111a,mdm-MIR2111b,mdm-MIR2111a,aly-MIR2111b,aly-MIR2111a,aly-MIR2111c,ppe-MIR211…	gma-MIR2111d	gaatgattgctgggtccggattaggTAATCTGCATCCTGAGGTTTAggacaatatcctttgttttgtttctaGTCCTTGGGATGCAGATTACGtcttccttgccagcactgtacaaca	gma-miR2111a	GTCCTTGGGATGCAGATTACG	3'	Diff	gp2a	...((((((..(((((.(((((((((((((((((((((.((((((((((......))))).))))).))))))))))))))))))))).)))).)...))))))...	101	36.4	-56.1	1.4	11	8	8.5	8.5	7	0	0	0	29	3	6.5	6.5	8.5	8.5	12.5	3.5	5.5	4	5	2.5	8.5	0	12	11	2.5	6.5
127	132	mtr-miR2111a-5p_R+3	TAATCTGCATCCTGAGGTTTAGAA	24	arahy.Tifrunner.gnm1.Arahy.14	-	93072291	93072397	tattattgggtcacgatggggTAATCTGCATCCTGAGGTTTAGAAcaatattttggttgtatctaATCCTTAGGATGCAGATTACGtcttcgttatcaccaatattt	49	mtr-MIR2111e,mtr-MIR2111a,mtr-MIR2111k,mtr-MIR2111f,mtr-MIR2111b,mtr-MIR2111i,mtr-MIR2111c,mtr-MIR2111d,mtr-MIR2111n,mtr-MIR2111o,mtr-MIR2111j,mtr-MIR2111h,mtr-MIR2111m,mtr-MIR2111g,gma-MIR2111b,gma-MIR2111e,gma-MIR2111a,gma-MIR2111d,gma-MIR2111c,gma-MIR2111f,lja-MIR2111,ptc-MIR2111a,ptc-MIR2111b,ath-MIR2111b,ath-MIR2111a,mdm-MIR2111b,mdm-MIR2111a,aly-MIR2111b,aly-MIR2111a,aly-MIR2111c,ppe-MIR211…	mtr-MIR2111g	atattgggtgaggatgggaTAATCTGCATCCTGAGGTTTAagacaatatttgcgtaatttccaaaaaataaataaattgcgtaatcgtttctaAGCCTCGGAGTGCGGATTATCttttcctatcaccaatgc	mtr-miR2111a-5p	TAATCTGCATCCTGAGGTTTA	5'	Diff	gp2a	...((((((...((((.(..((((((((((((((((((.((((((((((......))))).))))).))))))))))))))))))..).)))).....))))))...	101	36.4	-51.4	1.3	5.5	5.5	20	14	8.5	0	0	0	13	5	4.5	8.5	4.5	4	6.5	3	8	5	0	2.5	3	2.5	5.5	9.5	7	3
127	133	gma-miR2111a_2ss1GA7GA	ATCCTTAGGATGCAGATTACG	21	arahy.Tifrunner.gnm1.Arahy.14	-	93072291	93072397	tattattgggtcacgatggggTAATCTGCATCCTGAGGTTTAGAAcaatattttggttgtatctaATCCTTAGGATGCAGATTACGtcttcgttatcaccaatattt	49	mtr-MIR2111e,mtr-MIR2111a,mtr-MIR2111k,mtr-MIR2111f,mtr-MIR2111b,mtr-MIR2111i,mtr-MIR2111c,mtr-MIR2111d,mtr-MIR2111n,mtr-MIR2111o,mtr-MIR2111j,mtr-MIR2111h,mtr-MIR2111m,mtr-MIR2111g,gma-MIR2111b,gma-MIR2111e,gma-MIR2111a,gma-MIR2111d,gma-MIR2111c,gma-MIR2111f,lja-MIR2111,ptc-MIR2111a,ptc-MIR2111b,ath-MIR2111b,ath-MIR2111a,mdm-MIR2111b,mdm-MIR2111a,aly-MIR2111b,aly-MIR2111a,aly-MIR2111c,ppe-MIR211…	gma-MIR2111d	gaatgattgctgggtccggattaggTAATCTGCATCCTGAGGTTTAggacaatatcctttgttttgtttctaGTCCTTGGGATGCAGATTACGtcttccttgccagcactgtacaaca	gma-miR2111a	GTCCTTGGGATGCAGATTACG	3'	Diff	gp2a	...((((((...((((.(..((((((((((((((((((.((((((((((......))))).))))).))))))))))))))))))..).)))).....))))))...	101	36.4	-51.4	1.3	11	8	8.5	8.5	7	0	0	0	29	3	6.5	6.5	8.5	8.5	12.5	3.5	5.5	4	5	2.5	8.5	0	12	11	2.5	6.5
128	134	mtr-miR2111a-5p	TAATCTGCATCCTGAGGTTTA	21	arahy.Tifrunner.gnm1.Arahy.14	+	93396808	93396918	tattattggttaaggattagcTAATCTGCATCCTGAGGTTTAaatggcaattagtttgttgcattttagtctttaggctgcagattatcacttcctttttaatcaatgtgg	50	mtr-MIR2111d,mtr-MIR2111e,mtr-MIR2111a,mtr-MIR2111n,mtr-MIR2111o,mtr-MIR2111j,mtr-MIR2111k,mtr-MIR2111f,mtr-MIR2111b,mtr-MIR2111i,mtr-MIR2111c,mtr-MIR2111h,mtr-MIR2111m,mtr-MIR2111g,gma-MIR2111a,gma-MIR2111b,gma-MIR2111e,gma-MIR2111d,gma-MIR2111c,gma-MIR2111f,lja-MIR2111,ptc-MIR2111a,ptc-MIR2111b,ath-MIR2111b,ath-MIR2111a,mdm-MIR2111b,mdm-MIR2111a,aly-MIR2111b,aly-MIR2111a,aly-MIR2111c,ppe-MIR211…	mtr-MIR2111g	atattgggtgaggatgggaTAATCTGCATCCTGAGGTTTAagacaatatttgcgtaatttccaaaaaataaataaattgcgtaatcgtttctaAGCCTCGGAGTGCGGATTATCttttcctatcaccaatgc	mtr-miR2111a-5p	TAATCTGCATCCTGAGGTTTA	5'	Yes	gp2a	...(((((((((((((.....(((((((((.(((((((..((((..(((((......)))))..))))..))))))).))))))))).....))))...)))))))))...	105	33.3	-38.6	1	196	104	219	274	193	24	27	70	403	135	76	131	97	70	110	98	129	110	59	59	78	192	168	180	131	70
129	135	gma-MIR2118a-p5_2ss2AG20GT	GGGAAGAGCTTGAGGAAGTTATG	23	arahy.Tifrunner.gnm1.Arahy.09	-	112977753	112977927	ttcgagagagaagggaaagaGGGAAGAGCTTGAGGAAGTTATGggatatgggaggaccggcaaattagcatagcaaatctcatctgaatttttggatgatatttctatttattTTGCCGATTCCACCCATTCCTAtgatttcctctcgttcctctctttctactcgcctctcccc	11	mtr-MIR2118,gma-MIR2118b,gma-MIR2118a,vun-MIR2118,gso-MIR2218,pvu-MIR2118,ptc-MIR482d,stu-MIR482a,nta-MIR482c,nta-MIR482a,sly-MIR482a,	gma-MIR2118a	aagggaaagggagaagagcttgaggaagtgatgGGAGATGGGAGGGTCGGTAAAGaatatatctgagactcgactcaatctcgatctctctcagtgttgtgttgttttgtttatccttTTGCCGATTCCACCCATTCCTatgatttccttcggttcctctctttccactc	gma-MIR2118a-p5	gagaagagcttgaggaagtgatg	5'	New	gp2a	...(((((.((..((((((((((..((((..(((((((((((((((.(((((.(((.(((((((.(((.((((.((((.(((((..(....)..))))).))))))))))).)))))))..))).))))))))))))))))))))..))))))))))))))..))..)))))...	169	43.4	-85.2	1.1	519.5	262.5	526.5	912	432	75.5	42.5	99.5	792.5	247.5	206.5	175.5	208	399.5	716.5	254.5	600	316	233	204	277.5	391	294	410.5	293	270
129	136	mtr-miR2118_2ss3AG18TG	TTGCCGATTCCACCCATGCCTA	22	arahy.Tifrunner.gnm1.Arahy.09	-	112977753	112977927	ttcgagagagaagggaaagaGGGAAGAGCTTGAGGAAGTTATGggatatgggaggaccggcaaattagcatagcaaatctcatctgaatttttggatgatatttctatttattTTGCCGATTCCACCCATTCCTAtgatttcctctcgttcctctctttctactcgcctctcccc	11	mtr-MIR2118,gma-MIR2118b,gma-MIR2118a,vun-MIR2118,gso-MIR2218,pvu-MIR2118,ptc-MIR482d,stu-MIR482a,nta-MIR482c,nta-MIR482a,sly-MIR482a,	mtr-MIR2118	agagagagaaagggaaagggtgaaagagcttgaggaagttatgggatatgggaggatcggtaaaacagatctaattcatctgaattgaataatttctTTACCGATTCCACCCATTCCTAttatttccttttgttcctctctttccactctcctctccat	mtr-miR2118	TTACCGATTCCACCCATTCCTA	3'	Diff	gp2a	...(((((.((..((((((((((..((((..(((((((((((((((.(((((.(((.(((((((.(((.((((.((((.(((((..(....)..))))).))))))))))).)))))))..))).))))))))))))))))))))..))))))))))))))..))..)))))...	169	43.4	-85.2	1.1	16459	10084	14531	19074	10563.5	2159.5	1240	3659	20474.5	8860	7442	7009	7297	11243	14796	7234.5	14414	9074	4800.5	5632.5	4433	14715	12759	14244.5	6995	7226.5
130	135	gma-MIR2118a-p5_2ss2AG20GT	GGGAAGAGCTTGAGGAAGTTATG	23	arahy.Tifrunner.gnm1.Arahy.19	+	155453149	155453323	gctgagagagaacggaaagaGGGAAGAGCTTGAGGAAGTTATGggatatgggaggaccggcaaattagcatagcaaatctcatctgaatttttggatgatatttctatttattTTGCCGATTCCACCCATGCCTAtgatttcctctcgttcctctctttctactcgcctctcccc	13	mtr-MIR2118,gma-MIR2118b,gma-MIR2118a,vun-MIR2118,gso-MIR2218,pvu-MIR2118,ptc-MIR482d,stu-MIR482a,stu-MIR482c,nta-MIR482c,nta-MIR482a,sly-MIR482d,sly-MIR482a,	gma-MIR2118a	aagggaaagggagaagagcttgaggaagtgatgGGAGATGGGAGGGTCGGTAAAGaatatatctgagactcgactcaatctcgatctctctcagtgttgtgttgttttgtttatccttTTGCCGATTCCACCCATTCCTatgatttccttcggttcctctctttccactc	gma-MIR2118a-p5	gagaagagcttgaggaagtgatg	5'	New	gp2a	...(((((.((..((((((((((..((((..((((((((((((((.((((((.(((.(((((((.(((.((((.((((.(((((..(....)..))))).))))))))))).)))))))..))).))))))))))))))))))))..))))))))))))))..))..)))))...	169	44.6	-84.1	1.1	519.5	262.5	526.5	912	432	75.5	42.5	99.5	792.5	247.5	206.5	175.5	208	399.5	716.5	254.5	600	316	233	204	277.5	391	294	410.5	293	270
130	136	mtr-miR2118_2ss3AG18TG	TTGCCGATTCCACCCATGCCTA	22	arahy.Tifrunner.gnm1.Arahy.19	+	155453149	155453323	gctgagagagaacggaaagaGGGAAGAGCTTGAGGAAGTTATGggatatgggaggaccggcaaattagcatagcaaatctcatctgaatttttggatgatatttctatttattTTGCCGATTCCACCCATGCCTAtgatttcctctcgttcctctctttctactcgcctctcccc	13	mtr-MIR2118,gma-MIR2118b,gma-MIR2118a,vun-MIR2118,gso-MIR2218,pvu-MIR2118,ptc-MIR482d,stu-MIR482a,stu-MIR482c,nta-MIR482c,nta-MIR482a,sly-MIR482d,sly-MIR482a,	mtr-MIR2118	agagagagaaagggaaagggtgaaagagcttgaggaagttatgggatatgggaggatcggtaaaacagatctaattcatctgaattgaataatttctTTACCGATTCCACCCATTCCTAttatttccttttgttcctctctttccactctcctctccat	mtr-miR2118	TTACCGATTCCACCCATTCCTA	3'	Diff	gp2a	...(((((.((..((((((((((..((((..((((((((((((((.((((((.(((.(((((((.(((.((((.((((.(((((..(....)..))))).))))))))))).)))))))..))).))))))))))))))))))))..))))))))))))))..))..)))))...	169	44.6	-84.1	1.1	16459	10084	14531	19074	10563.5	2159.5	1240	3659	20474.5	8860	7442	7009	7297	11243	14796	7234.5	14414	9074	4800.5	5632.5	4433	14715	12759	14244.5	6995	7226.5
131	137	mtr-MIR2592bj-p3_2ss11TC18AT	TTCCCACTGTCCCTGTCT	18	arahy.Tifrunner.gnm1.Arahy.17	+	52491876	52491988	agcgcgggtaaacggcgggagtaactatgactctcttaaggtagccaaatgcctcgtcatctaattagtgacgcgcatgaatggattaacgagaTTCCCACTGTCCCTGTCTa	2	mtr-MIR2592bj,mtr-MIR2592bi,	mtr-MIR2592bj	ccaatatttgaccggaattcccactgttcctgtcaaaagattaaattcttgttaggctgatttaaatgaaggtattgaagtgtcaaggaatggacctcattcttttcacatttgaataccatcatttaatcccaacctaacaagaatttaatcttttgaaTGGAACATTGGGAATGCCGGTcgaatattgg	mtr-MIR2592bj-p3	ttcccactgttcctgtca	3'	New	gp2a	...(((((...((((.(((((..........((((((((..((.....((((..((((((.......)))))).))))...))..)))).))))))))).)))).)))))...	107	48.7	-31	0.6	6	7	0	7	0	0	32	5	12	0	0	5	0	0	16	13	7	0	11	6	7	0	6	12	0	0
132	138	mtr-MIR5204-p5	TCCCTCAAAGGCTTCCAGTA	20	arahy.Tifrunner.gnm1.Arahy.04	-	128158765	128158859	aactcttcatgtTCCCTCAAAGGCTTCCAGTAttcggtagtattcttttataactacttgaatgctggaggcctttgaaggagacttgaagatta	4	mtr-MIR5204,gma-MIR862a,gma-MIR862b,cpa-MIR477,	mtr-MIR5204	aacttttcatgttccctcaaaggcttccagtattcggtcatataattacttgaatGCTGGAAGGTTTTGTAGGAACttgatagctt	mtr-MIR5204-p5	tccctcaaaggcttccagta	5'	New	gp2a	...((((((.((..(((((((((((((((((((((((((((((......)).))))).)))))))))))))))))))).))..)).))))))...	89	38.9	-51	1.4	15	32.5	18	17	6.5	3	0	0	39	3.5	9	10	5.5	11	19	16	7.5	11	7	8	2.5	22	8	33.5	8.5	13.5
133	138	mtr-MIR5204-p5	TCCCTCAAAGGCTTCCAGTA	20	arahy.Tifrunner.gnm1.Arahy.14	-	142594295	142594389	aactcttcatgtTCCCTCAAAGGCTTCCAGTAttcggtagtattcttttataactacttgaatgctggaggcctttgaaggagacttgaagatta	4	mtr-MIR5204,gma-MIR862a,gma-MIR862b,cpa-MIR477,	mtr-MIR5204	aacttttcatgttccctcaaaggcttccagtattcggtcatataattacttgaatGCTGGAAGGTTTTGTAGGAACttgatagctt	mtr-MIR5204-p5	tccctcaaaggcttccagta	5'	New	gp2a	...((((((.((..(((((((((((((((((((((((((((((......)).))))).)))))))))))))))))))).))..)).))))))...	89	38.9	-51	1.4	15	32.5	18	17	6.5	3	0	0	39	3.5	9	10	5.5	11	19	16	7.5	11	7	8	2.5	22	8	33.5	8.5	13.5
134	139	mtr-MIR5206a-p5_2ss20GT21GC	AACCCTCAAAGGCTTCCATTC	21	arahy.Tifrunner.gnm1.Arahy.04	-	128174046	128174223	taagcaccatattattgaatggagaaattatcttctgcAACCCTCAAAGGCTTCCATTCtttgtatgttcaattccattattcaatttgaaaagaaaaaatgaacataaagaatgggagcctttttgggtcgttgaaggctttgctctttgtcttccaatagttaaaataagtgcatg	3	mtr-MIR5206a,mtr-MIR5206b,gma-MIR5037c,	mtr-MIR5206a	aaggccttcagtaaccctcaaaggcttccatggaatcatagcatggcttacggtcagattaatcatatatttgactatagtgatgtgaaaatcATGGGATCCTGTTGGTGGGTTACtgaaagcttt	mtr-MIR5206a-p5	aaccctcaaaggcttccatgg	5'	New	gp2a	...((((...(((((((.(..((((.....(((((..(.((((..((((((((((((((((..((((((((.........(((.....))).........))))))))))))))))))))))))..)))).)..)))))......))))..)....)))))))........))))...	172	33.7	-57.5	1	0	0	0	0	0	0	0	0	5.5	0	0	0	0	0	4.5	6	0	0	0	0	0	2.5	0	8	4	2.5
135	140	mtr-MIR5206b-p5_2ss20GT21GC	AACCCTCAAAGGCTTCCATTC	21	arahy.Tifrunner.gnm1.Arahy.13	+	17182927	17183090	ggcgattattgaatggagaaattatcttctgcAACCCTCAAAGGCTTCCATTCtttgtatgttcaattccattattcaatttggaaagaaaaaatgaacataataaagaaggggagtctttttgggttgttgaaggctttgctctttgaattccaatagttaaa	3	mtr-MIR5206b,mtr-MIR5206a,gma-MIR5037c,	mtr-MIR5206b	gaaggccttcagtaaccctcaaaggcttccatggaatcacatgttatggttagattaatcataactttgaccagtgatgtgaaaaaatcGTGGGATCCGTTGATGGGTTACtgaaagcttt	mtr-MIR5206b-p5	aaccctcaaaggcttccatgg	5'	New	gp2a	...(((((((((((((((......(((((..((((((..((((((((((.(((((((((((((((.(((((..........)))))........))))))).)))))))).))))))))))..))))))..))))).....))))....)))).)))))))...	158	33.5	-56.8	1	0	0	0	0	0	0	0	0	5.5	0	0	0	0	0	4.5	6	0	0	0	0	0	2.5	0	8	4	2.5
136	141	mtr-miR5225a_2ss3AT21AG	TCTGTCGCAGGAGAGATGACGC	22	arahy.Tifrunner.gnm1.Arahy.10	+	107113001	107113143	ctaagaaatatgtgagaggaactTCTGTCGCAGGAGAGATGATGCcttttgctacacactcggcctgctcgactggtcgtgtgtaataggctagtagcaataggaGTCATCTCTCTTCGACAAAAGtccctccactttctgcc	13	mtr-MIR5225b,mtr-MIR5225c,mtr-MIR5225a,gma-MIR5225,ptc-MIR3627b,mdm-MIR391,gra-MIR3267,stu-MIR391,ppe-MIR5225,fve-MIR3627a,fve-MIR3627b,fve-MIR5225,sly-MIR391,	mtr-MIR5225a	tacacggactTCAGTCGCAGGAGAGATGACACcttctgtttctaatggcatggttgcaaccaattttaacaggagttgtcatctttcttcgactgaagtccatatgcat	mtr-miR5225a	TCAGTCGCAGGAGAGATGACAC	5'	Diff	gp2a	...(((((...(((.((((.((((.(((((.(((((((((((..(((.(((((((((((.(((((.........))))).)))).........))))))).)))..)))))))))))))))).)))).))))))))))))...	137	48.3	-67.2	1	1401.5	2397.5	2749	3566.5	2460	505	248	610.5	3065.5	1997.5	2059	1418.5	1635.5	1638	3539	1633.5	1070.5	1331	730	841.5	1083	2979	1167	4532.5	1432.5	1563
136	142	fve-MIR5225-p3_2ss17TA18GA	GTCATCTCTCTTCGACAAAAG	21	arahy.Tifrunner.gnm1.Arahy.10	+	107113001	107113143	ctaagaaatatgtgagaggaactTCTGTCGCAGGAGAGATGATGCcttttgctacacactcggcctgctcgactggtcgtgtgtaataggctagtagcaataggaGTCATCTCTCTTCGACAAAAGtccctccactttctgcc	13	mtr-MIR5225b,mtr-MIR5225c,mtr-MIR5225a,gma-MIR5225,ptc-MIR3627b,mdm-MIR391,gra-MIR3267,stu-MIR391,ppe-MIR5225,fve-MIR3627a,fve-MIR3627b,fve-MIR5225,sly-MIR391,	fve-MIR5225	gatcgacgcgtagggacttCTGTCGTAGGAGAGATGGCGCCaaatgtatgatgattactgattgtatatgatgtttatagctactgtatattcatgcggtgggcgtcatctctcttcgactgaagcccctcggatcgatt	fve-MIR5225-p3	gtcatctctcttcgactgaag	3'	New	gp2a	...(((((...(((.((((.((((.(((((.(((((((((((..(((.(((((((((((.(((((.........))))).)))).........))))))).)))..)))))))))))))))).)))).))))))))))))...	137	48.3	-67.2	1	6.5	10.5	9	11	10	0	0	3	17.5	6.5	8	4.5	7.5	5	7.5	0	0	7.5	0	0	0	16	4.5	29.5	5.5	4.5
137	141	mtr-miR5225a_2ss3AT21AG	TCTGTCGCAGGAGAGATGACGC	22	arahy.Tifrunner.gnm1.Arahy.20	+	132215656	132215803	ctaagaaatgtgtgagaggaactTCTGTCGCAGGAGAGATGACGCcttttgctatacactcgactcggcctggtcgactggtcgtgtgtaattggctagtagcaataggaGTCATCTCTCTTCGACAAAAGtccctccactttctgac	13	mtr-MIR5225b,mtr-MIR5225c,mtr-MIR5225a,gma-MIR5225,ptc-MIR3627b,mdm-MIR391,gra-MIR3267,stu-MIR391,ppe-MIR5225,fve-MIR5225,fve-MIR3627a,fve-MIR3627b,sly-MIR391,	mtr-MIR5225a	tacacggactTCAGTCGCAGGAGAGATGACACcttctgtttctaatggcatggttgcaaccaattttaacaggagttgtcatctttcttcgactgaagtccatatgcat	mtr-miR5225a	TCAGTCGCAGGAGAGATGACAC	5'	Diff	gp2a	...(((((.(((.(((.((.((((.(((((.((((((((((((.(((.(((((((((((.(((((((((...)))))...)))).)))).........))))))).))).))))))))))))))))).)))))))))))))))))...	142	48.6	-70.6	1	1401.5	2397.5	2749	3566.5	2460	505	248	610.5	3065.5	1997.5	2059	1418.5	1635.5	1638	3539	1633.5	1070.5	1331	730	841.5	1083	2979	1167	4532.5	1432.5	1563
137	142	fve-MIR5225-p3_2ss17TA18GA	GTCATCTCTCTTCGACAAAAG	21	arahy.Tifrunner.gnm1.Arahy.20	+	132215656	132215803	ctaagaaatgtgtgagaggaactTCTGTCGCAGGAGAGATGACGCcttttgctatacactcgactcggcctggtcgactggtcgtgtgtaattggctagtagcaataggaGTCATCTCTCTTCGACAAAAGtccctccactttctgac	13	mtr-MIR5225b,mtr-MIR5225c,mtr-MIR5225a,gma-MIR5225,ptc-MIR3627b,mdm-MIR391,gra-MIR3267,stu-MIR391,ppe-MIR5225,fve-MIR5225,fve-MIR3627a,fve-MIR3627b,sly-MIR391,	fve-MIR5225	gatcgacgcgtagggacttCTGTCGTAGGAGAGATGGCGCCaaatgtatgatgattactgattgtatatgatgtttatagctactgtatattcatgcggtgggcgtcatctctcttcgactgaagcccctcggatcgatt	fve-MIR5225-p3	gtcatctctcttcgactgaag	3'	New	gp2a	...(((((.(((.(((.((.((((.(((((.((((((((((((.(((.(((((((((((.(((((((((...)))))...)))).)))).........))))))).))).))))))))))))))))).)))))))))))))))))...	142	48.6	-70.6	1	6.5	10.5	9	11	10	0	0	3	17.5	6.5	8	4.5	7.5	5	7.5	0	0	7.5	0	0	0	16	4.5	29.5	5.5	4.5
138	143	gma-miR6300_R+1_4	GTCGTTGTAGTATAGTGGT	19	arahy.Tifrunner.gnm1.Arahy.20	+	129175356	129175493	aattgtctatgaaacatcaaaGTCGTTGTAGTATAGTGGTgagtattcccgcctgtcacgcgggtgacccgggttcgatccccggcaacggcgcgcttttttatattccaaggctttgggctttttttggggacattt	1	gma-MIR6300,	gma-MIR6300	aggtaaaaatacttaccactatattacaacaacttgtttgtgaaattcaatggtaattttaaataataaatgttttaatattaccgatagcatttgattatatttttgttttaaagttacatttgattatatcgctatcggctataatgtaagtcatattcatccaatatcatgcaacttttttgtatagatatattaatattactcgataatcatcaaGTCGTTGTAGTATAGTGGtaagtattcccgcc	gma-miR6300	GTCGTTGTAGTATAGTGG	5'	Diff	gp2a	...(((((..((((..((((((((.(((.(((((((.((((.((.....((((((.....))))))..(((((.......))))).....)).))))...))))))).)))))))))))...))))....)))))...	132	48.6	-42.4	0.6	1343	1477	800	2584	1076	1079	2652	1888	1617	636	817	1543	641	768	1575	865	1025	1423	1983	791	1996	973	844	2045	922	814
1	1	ptc-miR156g_R+2	TTGACAGAAGATAGAGAGCACTC	23	arahy.Tifrunner.gnm1.Arahy.03	+	141994108	141994247	cggTTGACAGAAGAGAGAGAGCACTCtggaaatcttgagtatcagagcacgtagttgaatcctctacacctgaaaataaagactcaggtaaacaaacaagaaatatcagagagagtgagtttgaatcaatctgttaaaag	15	ptc-MIR156h,ath-MIR157c,stu-MIR156d,aly-MIR157c,nta-MIR156j,nta-MIR156i,sly-MIR156a,bra-MIR157a,bna-MIR156c,bna-MIR156b,cas-MIR157b,cas-MIR157d,rco-MIR156g,cca-MIR156c,bol-MIR157a,	ptc-MIR156h	ggtgatgctgTTGACAGAAGATAGAGAGCACtgacgatgaaatgcatggagcttaattgcatctcactcctttgtgctctctagtcttctgtcatcaccttca	ptc-miR156g	TTGACAGAAGATAGAGAGCAC	5'	Diff	gp2b	...((((((((.((..(((..((((((.((..(((((.............((((.........))))((((((..........)))))).......)))))....))....))))))..)))...))..))))))))...	134	38.6	-28.6	0.5	3.5	0	0	4	0	0	0	0	6.5	3	0	0	4	0	8.5	3	3.5	0	0	0	0	0	3	5	0	0
2	1	ptc-miR156g_R+2	TTGACAGAAGATAGAGAGCACTC	23	arahy.Tifrunner.gnm1.Arahy.13	+	145043557	145043696	cggTTGACAGAAGAGAGAGAGCACTCtggaaatcttgagtatcagagcacgtagttgaatcctctacacctgaaaataaagactcaggtaaacaaacaagaaatatcagagagagtgagtttgaatcaatctgttaaaag	15	ptc-MIR156h,ath-MIR157c,stu-MIR156d,aly-MIR157c,nta-MIR156j,nta-MIR156i,sly-MIR156a,bra-MIR157a,bna-MIR156c,bna-MIR156b,cas-MIR157b,cas-MIR157d,rco-MIR156g,cca-MIR156c,bol-MIR157a,	ptc-MIR156h	ggtgatgctgTTGACAGAAGATAGAGAGCACtgacgatgaaatgcatggagcttaattgcatctcactcctttgtgctctctagtcttctgtcatcaccttca	ptc-miR156g	TTGACAGAAGATAGAGAGCAC	5'	Diff	gp2b	...((((((((.((..(((..((((((.((..(((((.............((((.........))))((((((..........)))))).......)))))....))....))))))..)))...))..))))))))...	134	38.6	-28.6	0.5	3.5	0	0	4	0	0	0	0	6.5	3	0	0	4	0	8.5	3	3.5	0	0	0	0	0	3	5	0	0
3	2	mtr-miR156b-5p_R+2	TGACAGAAGAGAGTGAGCACTT	22	arahy.Tifrunner.gnm1.Arahy.06	+	109924122	109924227	ttttcttttctttccttttcccccaattttttcatcctgggaagtttctaaatttgggaaattattaatttggcacatagaaatTGACAGAAGAGAGTGAGCACAT	9	mtr-MIR156i,mtr-MIR156d,gma-MIR156q,gma-MIR156s,mes-MIR156d,lus-MIR156g,cme-MIR156d,bra-MIR156e,bna-MIR156e,	mtr-MIR156d	gaaatTGACAGAAGAGAGTGAGCACatagacactcggtatagatgtatatcgttgcctttgcgTGCTCACTCATCTTTCTGTCAAAttcc	mtr-miR156b-5p	TGACAGAAGAGAGTGAGCAC	3'	Diff	gp2b	..(((((((((.((..((((.((((............)))).(((((((.......)))))))................))))..)).))))))))).........	95	33	-19.8	0.6	21	0	22	31	15	5	0	10	32	12	13	18	9	19	30	18	26	9	0	5	6	9	12	41	15	10
4	3	csi-MIR156h-p3_1ss17AC	TTGACAGAAGATAGAGCAC	19	arahy.Tifrunner.gnm1.Arahy.12	-	2390469	2390497	atattgtcttTTGACAGAAGATAGAGAAC	1	csi-MIR156h,	csi-MIR156h	gaacttttgttgACAGAAGATAGAGAACACATAaattaaaatgccattaatcaaacgcattttaaatctttgtgctctctatattctgtcatcaacgtgca	csi-MIR156h-p3	ttgACAGAAGATAGAGAAC	3'	New	gp2b	...((((((((.....)))))))).....	21	31	-5	0.6	3	0	0	5	0	0	0	0	6.5	0	0	0	0	4	3.5	0	0	0	0	0	0	0	0	0	0	0
5	3	csi-MIR156h-p3_1ss17AC	TTGACAGAAGATAGAGCAC	19	arahy.Tifrunner.gnm1.Arahy.16	-	148163276	148163304	atattatcttTTGACAGAAGATAGAGAAC	1	csi-MIR156h,	csi-MIR156h	gaacttttgttgACAGAAGATAGAGAACACATAaattaaaatgccattaatcaaacgcattttaaatctttgtgctctctatattctgtcatcaacgtgca	csi-MIR156h-p3	ttgACAGAAGATAGAGAAC	3'	New	gp2b	...((((((((.....)))))))).....	21	27.6	-5	0.6	3	0	0	5	0	0	0	0	6.5	0	0	0	0	4	3.5	0	0	0	0	0	0	0	0	0	0	0
6	4	ath-MIR159b-p5_1ss6AT	TTTGGTTTGAAGGGAGCTCTT	21	arahy.Tifrunner.gnm1.Arahy.02	-	9038454	9038499	taacattacaatTTTGGTTTGAAGGGGGCTCTTTtgagtaatgaag	9	ath-MIR159b,ath-MIR159c,aly-MIR159b,aly-MIR159c,lus-MIR159c,lus-MIR159b,cas-MIR159b,cas-MIR159c,cas-MIR159a,	ath-MIR159b	ggaaGAGCTCCTTGAAGTTCAATGGagggtttagcagggtgaagtaaagctgctaagctatggatcccataagccttatcaaattcaatataattgatgataaggttttttttatggatgccatatctcaggagctttcacttacccctttaatggcttcactcttcTTTGGATTGAAGGGAGCTCTTcatctctc	ath-MIR159b-p5	TTTGGATTGAAGGGAGCTCTT	5'	New	gp2b	...((((((.........(..(((((...)))))..)))))))...	40	34.8	-7.4	0.5	0	0	0	0	0	0	0	0	0	0	0	0	0	0	2.5	0	0	0	0	0	0	0	0	0	0	0
6	5	ath-miR159b-3p_R+1_1ss15AG	TTTGGATTGAAGGGGGCTCTTT	22	arahy.Tifrunner.gnm1.Arahy.02	-	9038454	9038499	taacattacaatTTTGGTTTGAAGGGGGCTCTTTtgagtaatgaag	9	ath-MIR159b,ath-MIR159c,aly-MIR159b,aly-MIR159c,lus-MIR159c,lus-MIR159b,cas-MIR159b,cas-MIR159c,cas-MIR159a,	ath-MIR159b	ggaaGAGCTCCTTGAAGTTCAATGGagggtttagcagggtgaagtaaagctgctaagctatggatcccataagccttatcaaattcaatataattgatgataaggttttttttatggatgccatatctcaggagctttcacttacccctttaatggcttcactcttcTTTGGATTGAAGGGAGCTCTTcatctctc	ath-miR159b-3p	TTTGGATTGAAGGGAGCTCTT	3'	Diff	gp2b	...((((((.........(..(((((...)))))..)))))))...	40	34.8	-7.4	0.5	0	0	0	0	0	0	0	0	2.5	0	0	0	0	0	0	0	0	0	0	0	0	0	0	0	0	0
7	6	mes-miR159a-5p_2ss8GA21CA	AGCTGCTAAGCTATGGATCCA	21	arahy.Tifrunner.gnm1.Arahy.03	+	136409122	136409256	AGCTGCTAAGCTATGGATCCCacagtactacccatatataccccattatgcagtggtagttctgcggattccatatcctgggagcttcattacctttccacagatccttaTTTGGATTGAAGGGAGCTCTACata	29	mtr-MIR159a,gma-MIR159e,gma-MIR159a,pvu-MIR159a,ptc-MIR159b,ptc-MIR159a,ath-MIR159a,mdm-MIR159d,mdm-MIR159f,mdm-MIR159e,aly-MIR159a,ppe-MIR159,mes-MIR159b,mes-MIR159a,vvi-MIR159c,nta-MIR159,csi-MIR159a,lus-MIR159b,cme-MIR159a,fve-MIR159a,fve-MIR159b,sly-MIR159,bra-MIR159a,bna-MIR159,cpa-MIR159a,rco-MIR159,aqc-MIR159,hbr-MIR159a,htu-MIR159a,	mes-MIR159a	tggagctccttgaagtccaatagaggatcttgctgggtagattgAGCTGCTGAGCTATGGATCCCacagccctatctcataataaagactttagtcttcttggataggcttgtggcttgcatatctcaggagcttcattacctcttatgttagatccttgTTTGGATTGAAGGGAGCTCTA	mes-miR159a-5p	AGCTGCTGAGCTATGGATCCC	5'	Diff	gp2b	((((....))))(((((..((.(((.((((((((((..........))))....)))))).))).))..)))))......((((((......((((((....(((((......))))))))))))))))).....	62	44.4	-42.4	0.7	0	0	0	0	0	0	0	0	0	0	0	0	0	0	0	0	0	2.5	0	0	0	0	2.5	0	0	0
7	7	mtr-miR159a_R+1	TTTGGATTGAAGGGAGCTCTAA	22	arahy.Tifrunner.gnm1.Arahy.03	+	136409122	136409256	AGCTGCTAAGCTATGGATCCCacagtactacccatatataccccattatgcagtggtagttctgcggattccatatcctgggagcttcattacctttccacagatccttaTTTGGATTGAAGGGAGCTCTACata	29	mtr-MIR159a,gma-MIR159e,gma-MIR159a,pvu-MIR159a,ptc-MIR159b,ptc-MIR159a,ath-MIR159a,mdm-MIR159d,mdm-MIR159f,mdm-MIR159e,aly-MIR159a,ppe-MIR159,mes-MIR159b,mes-MIR159a,vvi-MIR159c,nta-MIR159,csi-MIR159a,lus-MIR159b,cme-MIR159a,fve-MIR159a,fve-MIR159b,sly-MIR159,bra-MIR159a,bna-MIR159,cpa-MIR159a,rco-MIR159,aqc-MIR159,hbr-MIR159a,htu-MIR159a,	mtr-MIR159a	ggggtggagcttcctttagtccaaatatggatcttgctatgttgatagagctgcttagctatgggtccctcaactctacccatcttgttctttgtggtagttttgtggcttccatatctagggagccttatcacctttagtttaatctttcTTTGGATTGAAGGGAGCTCTAcatcttgctct	mtr-miR159a	TTTGGATTGAAGGGAGCTCTA	3'	Diff	gp2b	((((....))))(((((..((.(((.((((((((((..........))))....)))))).))).))..)))))......((((((......((((((....(((((......))))))))))))))))).....	62	44.4	-42.4	0.7	185	77	208	218	135.5	30	34	57.5	241	85	84	97	102.5	103	196	91	169	124.5	85.5	95	96	124	145.5	177.5	134.5	114
8	6	mes-miR159a-5p_2ss8GA21CA	AGCTGCTAAGCTATGGATCCA	21	arahy.Tifrunner.gnm1.Arahy.13	+	139202578	139202712	AGCTGCTAAGCTATGGATCCCacagtactacccatatataccccattatgcagtggtagttctgcggattccatatcctgggagcttcattacctttcctcagatccttaTTTGGATTGAAGGGAGCTCTAcata	32	mtr-MIR159a,gma-MIR159e,gma-MIR159a,pvu-MIR159a,ptc-MIR159b,ptc-MIR159a,ath-MIR159a,ath-MIR159b,mdm-MIR159d,mdm-MIR159f,mdm-MIR159e,aly-MIR159a,aly-MIR159b,ppe-MIR159,mes-MIR159b,mes-MIR159a,vvi-MIR159c,nta-MIR159,csi-MIR159a,lus-MIR159b,cme-MIR159a,fve-MIR159a,sly-MIR159,bra-MIR159a,bna-MIR159,cas-MIR159b,cas-MIR159c,cpa-MIR159a,rco-MIR159,aqc-MIR159,hbr-MIR159a,htu-MIR159a,	mes-MIR159a	tggagctccttgaagtccaatagaggatcttgctgggtagattgAGCTGCTGAGCTATGGATCCCacagccctatctcataataaagactttagtcttcttggataggcttgtggcttgcatatctcaggagcttcattacctcttatgttagatccttgTTTGGATTGAAGGGAGCTCTA	mes-miR159a-5p	AGCTGCTGAGCTATGGATCCC	5'	Diff	gp2b	((((.(((...((((((..((.(((.((((((((((..........))))....)))))).))).))..))))))...))).))))........((((((..(((((......)))))..)))))).........	86	44.4	-43.2	0.7	0	0	0	0	0	0	0	0	0	0	0	0	0	0	0	0	0	2.5	0	0	0	0	2.5	0	0	0
8	8	mtr-miR159a_1ss21AC	TTTGGATTGAAGGGAGCTCTC	21	arahy.Tifrunner.gnm1.Arahy.13	+	139202578	139202712	AGCTGCTAAGCTATGGATCCCacagtactacccatatataccccattatgcagtggtagttctgcggattccatatcctgggagcttcattacctttcctcagatccttaTTTGGATTGAAGGGAGCTCTAcata	32	mtr-MIR159a,gma-MIR159e,gma-MIR159a,pvu-MIR159a,ptc-MIR159b,ptc-MIR159a,ath-MIR159a,ath-MIR159b,mdm-MIR159d,mdm-MIR159f,mdm-MIR159e,aly-MIR159a,aly-MIR159b,ppe-MIR159,mes-MIR159b,mes-MIR159a,vvi-MIR159c,nta-MIR159,csi-MIR159a,lus-MIR159b,cme-MIR159a,fve-MIR159a,sly-MIR159,bra-MIR159a,bna-MIR159,cas-MIR159b,cas-MIR159c,cpa-MIR159a,rco-MIR159,aqc-MIR159,hbr-MIR159a,htu-MIR159a,	mtr-MIR159a	ggggtggagcttcctttagtccaaatatggatcttgctatgttgatagagctgcttagctatgggtccctcaactctacccatcttgttctttgtggtagttttgtggcttccatatctagggagccttatcacctttagtttaatctttcTTTGGATTGAAGGGAGCTCTAcatcttgctct	mtr-miR159a	TTTGGATTGAAGGGAGCTCTA	3'	Diff	gp2b	((((.(((...((((((..((.(((.((((((((((..........))))....)))))).))).))..))))))...))).))))........((((((..(((((......)))))..)))))).........	86	44.4	-43.2	0.7	503	139.5	372	374	234	50	49	89	462	136.5	144	182	180.5	182	297.5	280	331	366	305.5	280	306.5	306	655.5	346	396	362
9	9	mes-MIR159a-p5_1ss4GC	CTTCCATATCTCAGGAGCTTC	21	arahy.Tifrunner.gnm1.Arahy.05	+	101159666	101159745	CTTCCATATCTCAGGAGCTTCattaccaatgttttgatccttaTTTGGATTGAAGGGAGCTCTTcaccttcatctccttt	43	gma-MIR159e,gma-MIR159a,ptc-MIR159a,ptc-MIR159b,ptc-MIR159d,ath-MIR159b,ath-MIR159c,mdm-MIR159d,mdm-MIR159d,mdm-MIR159d,mdm-MIR159f,mdm-MIR159f,mdm-MIR159f,mdm-MIR159e,mdm-MIR159e,mdm-MIR159e,aly-MIR159b,aly-MIR159c,aly-MIR159a,ppe-MIR159,mes-MIR159b,mes-MIR159a,vvi-MIR159c,nta-MIR159,csi-MIR159a,csi-MIR159a,csi-MIR159a,lus-MIR159c,lus-MIR159b,cme-MIR159a,cme-MIR159b,fve-MIR159a,fve-MIR159b,sly-M…	mes-MIR159a	tggagctccttgaagtccaatagaggatcttgctgggtagattgAGCTGCTGAGCTATGGATCCCacagccctatctcataataaagactttagtcttcttggataggcttgtggcttgcatatctcaggagcttcattacctcttatgttagatccttgTTTGGATTGAAGGGAGCTCTA	mes-MIR159a-p5	cttgcatatctcaggagcttc	5'	New	gp2b	............(((((((((..........(((..((((......))))..))))))))))))................	52	40	-18	0.6	733	686.5	974	1000	578.5	106.5	88	181.5	1988.5	608.5	373.5	421.5	422	984.5	1041	509	674.5	609	243.5	196.5	237	822.5	817	1326	387.5	382.5
9	10	gma-miR159a-3p_1ss21AT	TTTGGATTGAAGGGAGCTCTT	21	arahy.Tifrunner.gnm1.Arahy.05	+	101159666	101159745	CTTCCATATCTCAGGAGCTTCattaccaatgttttgatccttaTTTGGATTGAAGGGAGCTCTTcaccttcatctccttt	43	gma-MIR159e,gma-MIR159a,ptc-MIR159a,ptc-MIR159b,ptc-MIR159d,ath-MIR159b,ath-MIR159c,mdm-MIR159d,mdm-MIR159d,mdm-MIR159d,mdm-MIR159f,mdm-MIR159f,mdm-MIR159f,mdm-MIR159e,mdm-MIR159e,mdm-MIR159e,aly-MIR159b,aly-MIR159c,aly-MIR159a,ppe-MIR159,mes-MIR159b,mes-MIR159a,vvi-MIR159c,nta-MIR159,csi-MIR159a,csi-MIR159a,csi-MIR159a,lus-MIR159c,lus-MIR159b,cme-MIR159a,cme-MIR159b,fve-MIR159a,fve-MIR159b,sly-M…	gma-MIR159a	aattaaaggggattatgaagtgGAGCTCCTTGAAGTCCAATTGaggatcttactgggtgaattgagctgcttagctatggatcccacagttctacccatcaataagtgcttttgtggtagtcttgtggcttccatatctggggagcttcatttgcctttatagtattaaccttcTTTGGATTGAAGGGAGCTCTAcacccttctcttcttttct	gma-miR159a-3p	TTTGGATTGAAGGGAGCTCTA	3'	Diff	gp2b	............(((((((((..........(((..((((......))))..))))))))))))................	52	40	-18	0.6	69515.5	41630	66232.5	80872.5	48720	9117.5	7805.5	14372	107783	39583.5	26182	36264.5	28455	54086.5	76138	42926.5	54952	46468	23812	19909.5	22759.5	62178	68104.5	58263	42219.5	38779
10	11	mtr-MIR159b-p5_2ss16AT21GA	TTTGCATGAATTTGGTGATAAGG	23	arahy.Tifrunner.gnm1.Arahy.06	-	2842922	2843008	TTTGCATGAATTTGGTGATAAGGtcaattgcctttaatctttttggtATTGGAGTGAAGGGAGCGCCAccgaaccattagcttcgtg	4	mtr-MIR159b,gma-MIR159b,gma-MIR159f,gma-MIR156z,	mtr-MIR159b	aacctaatttggggctctccgcactccaagtctaaaaggaggtgatagtttacccttgctgcttgttcatggttacctttgactttgcacattggaaacttaccaaagtcatgggtttgcatgaatttggagatagggttgccttgatctttttgtATTGGAGTGAAGGGAGCTCCAaaattggac	mtr-MIR159b-p5	tttgcatgaatttggagataggg	5'	New	gp2b	....((((((..((((.....(((...((.((((((.(((..........))).)))))).)).))).....)))).....))))))	83	42.5	-18.5	0.5	0	0	0	0	0	0	0	0	0	0	0	0	0	0	0	0	3	0	0	0	0	0	0	0	0	0
10	12	mtr-miR159b_1ss18TG	ATTGGAGTGAAGGGAGCGCCA	21	arahy.Tifrunner.gnm1.Arahy.06	-	2842922	2843008	TTTGCATGAATTTGGTGATAAGGtcaattgcctttaatctttttggtATTGGAGTGAAGGGAGCGCCAccgaaccattagcttcgtg	4	mtr-MIR159b,gma-MIR159b,gma-MIR159f,gma-MIR156z,	mtr-MIR159b	aacctaatttggggctctccgcactccaagtctaaaaggaggtgatagtttacccttgctgcttgttcatggttacctttgactttgcacattggaaacttaccaaagtcatgggtttgcatgaatttggagatagggttgccttgatctttttgtATTGGAGTGAAGGGAGCTCCAaaattggac	mtr-miR159b	ATTGGAGTGAAGGGAGCTCCA	3'	Diff	gp2b	....((((((..((((.....(((...((.((((((.(((..........))).)))))).)).))).....)))).....))))))	83	42.5	-18.5	0.5	0	0	0	0	0	0	0	3.5	3	0	0	3	0	0	0	0	13	0	2.5	0	4.5	0	23.5	2.5	2.5	0
11	11	mtr-MIR159b-p5_2ss16AT21GA	TTTGCATGAATTTGGTGATAAGG	23	arahy.Tifrunner.gnm1.Arahy.16	+	21603092	21603178	TTTGCATGAATTTGGTGATAAGGtcaattgcctttaatctttttggtATTGGAGTGAAGGGAGCGCCAccgaaccattagcttcgtg	4	mtr-MIR159b,gma-MIR159b,gma-MIR159f,gma-MIR156z,	mtr-MIR159b	aacctaatttggggctctccgcactccaagtctaaaaggaggtgatagtttacccttgctgcttgttcatggttacctttgactttgcacattggaaacttaccaaagtcatgggtttgcatgaatttggagatagggttgccttgatctttttgtATTGGAGTGAAGGGAGCTCCAaaattggac	mtr-MIR159b-p5	tttgcatgaatttggagataggg	5'	New	gp2b	....((((((..((((.....(((...((.((((((.(((..........))).)))))).)).))).....)))).....))))))	83	42.5	-18.5	0.5	0	0	0	0	0	0	0	0	0	0	0	0	0	0	0	0	3	0	0	0	0	0	0	0	0	0
11	12	mtr-miR159b_1ss18TG	ATTGGAGTGAAGGGAGCGCCA	21	arahy.Tifrunner.gnm1.Arahy.16	+	21603092	21603178	TTTGCATGAATTTGGTGATAAGGtcaattgcctttaatctttttggtATTGGAGTGAAGGGAGCGCCAccgaaccattagcttcgtg	4	mtr-MIR159b,gma-MIR159b,gma-MIR159f,gma-MIR156z,	mtr-MIR159b	aacctaatttggggctctccgcactccaagtctaaaaggaggtgatagtttacccttgctgcttgttcatggttacctttgactttgcacattggaaacttaccaaagtcatgggtttgcatgaatttggagatagggttgccttgatctttttgtATTGGAGTGAAGGGAGCTCCAaaattggac	mtr-miR159b	ATTGGAGTGAAGGGAGCTCCA	3'	Diff	gp2b	....((((((..((((.....(((...((.((((((.(((..........))).)))))).)).))).....)))).....))))))	83	42.5	-18.5	0.5	0	0	0	0	0	0	0	3.5	3	0	0	3	0	0	0	0	13	0	2.5	0	4.5	0	23.5	2.5	2.5	0
12	13	pvu-miR159a.2_2ss12GC13GA	CTTCCATATCTCAGGAGCTTC	21	arahy.Tifrunner.gnm1.Arahy.15	-	143009022	143009095	CTTCCATATCTCAGGAGCTTCattaccaatggtttgatccttaTTTGGATTGAAGGGAGCTCTTcaccttcatc	42	mtr-MIR159a,gma-MIR159a,gma-MIR159e,pvu-MIR159a,ptc-MIR159b,ptc-MIR159a,ptc-MIR159d,ath-MIR159b,ath-MIR159a,ath-MIR159c,mdm-MIR159d,mdm-MIR159d,mdm-MIR159f,mdm-MIR159f,mdm-MIR159e,mdm-MIR159e,aly-MIR159b,aly-MIR159a,aly-MIR159c,ppe-MIR159,mes-MIR159b,mes-MIR159a,vvi-MIR159c,nta-MIR159,csi-MIR159a,csi-MIR159a,lus-MIR159c,lus-MIR159b,cme-MIR159a,cme-MIR159b,fve-MIR159a,fve-MIR159b,sly-MIR159,bra-MI…	pvu-MIR159a	gtggagctccttgaagtccaattgaggatcttactgggtggattgagctgcttagctatggatcccacagttctacccatcagcatgttttgtggtagtcttgtggCTTCCATATCTGGGGAGCTTCatctgcctctatagtatcatccttcTTTGGATTGAAGGGAGCTCTAc	pvu-miR159a.2	CTTCCATATCTGGGGAGCTTC	5'	Diff	gp2b	............(((((((((...(((...)))(..((((......))))..)..)))))))))..........	52	41.9	-18.8	0.6	733	686.5	974	1000	578.5	106.5	88	181.5	1988.5	608.5	373.5	421.5	422	984.5	1041	509	674.5	609	243.5	196.5	237	822.5	817	1326	387.5	382.5
12	14	mtr-miR159a_1ss21AT	TTTGGATTGAAGGGAGCTCTT	21	arahy.Tifrunner.gnm1.Arahy.15	-	143009022	143009095	CTTCCATATCTCAGGAGCTTCattaccaatggtttgatccttaTTTGGATTGAAGGGAGCTCTTcaccttcatc	42	mtr-MIR159a,gma-MIR159a,gma-MIR159e,pvu-MIR159a,ptc-MIR159b,ptc-MIR159a,ptc-MIR159d,ath-MIR159b,ath-MIR159a,ath-MIR159c,mdm-MIR159d,mdm-MIR159d,mdm-MIR159f,mdm-MIR159f,mdm-MIR159e,mdm-MIR159e,aly-MIR159b,aly-MIR159a,aly-MIR159c,ppe-MIR159,mes-MIR159b,mes-MIR159a,vvi-MIR159c,nta-MIR159,csi-MIR159a,csi-MIR159a,lus-MIR159c,lus-MIR159b,cme-MIR159a,cme-MIR159b,fve-MIR159a,fve-MIR159b,sly-MIR159,bra-MI…	mtr-MIR159a	ggggtggagcttcctttagtccaaatatggatcttgctatgttgatagagctgcttagctatgggtccctcaactctacccatcttgttctttgtggtagttttgtggcttccatatctagggagccttatcacctttagtttaatctttcTTTGGATTGAAGGGAGCTCTAcatcttgctct	mtr-miR159a	TTTGGATTGAAGGGAGCTCTA	3'	Diff	gp2b	............(((((((((...(((...)))(..((((......))))..)..)))))))))..........	52	41.9	-18.8	0.6	69515.5	41630	66232.5	80872.5	48720	9117.5	7805.5	14372	107783	39583.5	26182	36264.5	28455	54086.5	76138	42926.5	54952	46468	23812	19909.5	22759.5	62178	68104.5	58263	42219.5	38779
13	15	ath-miR159b-3p_2ss17CT19CT	TTTGGATTGAAGGGAGTTTTT	21	arahy.Tifrunner.gnm1.Arahy.03	-	15182964	15183020	tcctcatattcttccagcgatacttttatgcttggcTTTGGATTGAAGGGAGTTTCT	8	ath-MIR159c,ath-MIR159b,aly-MIR159c,aly-MIR159b,lus-MIR159c,cas-MIR159a,cas-MIR159b,cas-MIR159c,	ath-MIR159b	ggaaGAGCTCCTTGAAGTTCAATGGagggtttagcagggtgaagtaaagctgctaagctatggatcccataagccttatcaaattcaatataattgatgataaggttttttttatggatgccatatctcaggagctttcacttacccctttaatggcttcactcttcTTTGGATTGAAGGGAGCTCTTcatctctc	ath-miR159b-3p	TTTGGATTGAAGGGAGCTCTT	3'	Diff	gp2b	((((((.((((..(((((.(((....))))).)))....)))))).)))).......	50	40.4	-9	0.4	34.5	13.5	24.5	37	20.5	0	4	7	68	17.5	9	13	19	19.5	45	16	21	22.5	12.5	10.5	13.5	25.5	27	31.5	23.5	12
14	15	ath-miR159b-3p_2ss17CT19CT	TTTGGATTGAAGGGAGTTTTT	21	arahy.Tifrunner.gnm1.Arahy.12	-	72077819	72077898	cTTTGGATTGAAGGGAGTTTCTatttctggactagcgtcaaaggactccttctttagcacgtactccttagcaaccatat	8	ath-MIR159c,ath-MIR159b,aly-MIR159c,aly-MIR159b,lus-MIR159c,cas-MIR159a,cas-MIR159b,cas-MIR159c,	ath-MIR159b	ggaaGAGCTCCTTGAAGTTCAATGGagggtttagcagggtgaagtaaagctgctaagctatggatcccataagccttatcaaattcaatataattgatgataaggttttttttatggatgccatatctcaggagctttcacttacccctttaatggcttcactcttcTTTGGATTGAAGGGAGCTCTTcatctctc	ath-miR159b-3p	TTTGGATTGAAGGGAGCTCTT	5'	Diff	gp2b	...(((.(((.(((((((.((((....)))).....(..((((((....))))))..)....)))))))..))))))...	74	42.5	-17	0.5	34.5	13.5	24.5	37	20.5	0	4	7	68	17.5	9	13	19	19.5	45	16	21	22.5	12.5	10.5	13.5	25.5	27	31.5	23.5	12
15	16	ath-miR159b-3p_L-2_1ss4GT	TTGATTGAAGGGAGCTCTT	19	arahy.Tifrunner.gnm1.Arahy.03	-	67970269	67970300	gagTTGATTGAAGGGAGCCCTTgagttggaag	5	ath-MIR159b,aly-MIR159b,lus-MIR159c,cas-MIR159b,cas-MIR159c,	ath-MIR159b	ggaaGAGCTCCTTGAAGTTCAATGGagggtttagcagggtgaagtaaagctgctaagctatggatcccataagccttatcaaattcaatataattgatgataaggttttttttatggatgccatatctcaggagctttcacttacccctttaatggcttcactcttcTTTGGATTGAAGGGAGCTCTTcatctctc	ath-miR159b-3p	TTTGGATTGAAGGGAGCTCTT	5'	Diff	gp2b	...(..(((.((((....)))).)))..)...	26	50	-9.2	0.6	3	2.5	0	0	0	0	0	0	0	0	0	0	0	3.5	2.5	2.5	0	0	0	0	0	0	0	0	0	4
16	16	ath-miR159b-3p_L-2_1ss4GT	TTGATTGAAGGGAGCTCTT	19	arahy.Tifrunner.gnm1.Arahy.11	-	104500904	104501002	atgtctctctttaattccctttcatatgctatgaattttacattcacaatgagcgagttgttccctaacttgatggggagTTGATTGAAGGGAACTCTT	5	ath-MIR159b,aly-MIR159b,lus-MIR159c,cas-MIR159b,cas-MIR159c,	ath-MIR159b	ggaaGAGCTCCTTGAAGTTCAATGGagggtttagcagggtgaagtaaagctgctaagctatggatcccataagccttatcaaattcaatataattgatgataaggttttttttatggatgccatatctcaggagctttcacttacccctttaatggcttcactcttcTTTGGATTGAAGGGAGCTCTTcatctctc	ath-miR159b-3p	TTTGGATTGAAGGGAGCTCTT	3'	Diff	gp2b	...((((((.((((((((((.((((.((...(((((.....))))))))))).(((((((.....)))))))..))))))))))..)).))))......	90	37.4	-23.8	0.6	3	2.5	0	0	0	0	0	0	0	0	0	0	0	3.5	2.5	2.5	0	0	0	0	0	0	0	0	0	4
17	17	ptc-miR159d_L-1R-1	TTGGATTGAAGGGAGCTCC	19	arahy.Tifrunner.gnm1.Arahy.05	+	99283533	99283598	atccaTTGGATTGAAGGGAGCTCCaattttcacttcttttcttttgttaccttttctcctttgcag	13	ptc-MIR159d,ptc-MIR159a,ptc-MIR159b,ath-MIR159c,mdm-MIR159a,mdm-MIR159c,mdm-MIR159b,aly-MIR159c,cme-MIR159b,fve-MIR159b,fve-MIR159c,cas-MIR159a,cpa-MIR159b,	ptc-MIR159d	ttgtaaatttgggagctttctttggttcaaaatgaggaaagaaagtgggtatactcgtctgcttgttcatggatacctctgggttgcgcaggatatattagttagggctacagcttaagggtttgcatggccaaggagacgttgcctgccttctcctttcgtttCTTGGATTGAAGGGAGCTCCTacatgtatc	ptc-miR159d	CTTGGATTGAAGGGAGCTCCT	5'	Diff	gp2b	...((..(((..(((((.(((........................))).)))))..)))..))...	60	37.9	-11	0.4	42.5	7	27.5	24.5	19.5	0	0	0	85.5	8.5	3	15.5	5	12.5	16.5	27.5	27	35	17.5	9	12	32	62.5	26.5	30	25.5
18	17	ptc-miR159d_L-1R-1	TTGGATTGAAGGGAGCTCC	19	arahy.Tifrunner.gnm1.Arahy.15	-	145843903	145843982	ttagctcatccaTTGGATTGAAGGGAGCTCCaattttcacttcttttcttttgttaccttttttcctttgcagttgcaga	13	ptc-MIR159d,ptc-MIR159b,ptc-MIR159a,ath-MIR159c,mdm-MIR159a,mdm-MIR159c,mdm-MIR159b,aly-MIR159c,cme-MIR159b,fve-MIR159b,fve-MIR159c,cas-MIR159a,cpa-MIR159b,	ptc-MIR159d	ttgtaaatttgggagctttctttggttcaaaatgaggaaagaaagtgggtatactcgtctgcttgttcatggatacctctgggttgcgcaggatatattagttagggctacagcttaagggtttgcatggccaaggagacgttgcctgccttctcctttcgtttCTTGGATTGAAGGGAGCTCCTacatgtatc	ptc-miR159d	CTTGGATTGAAGGGAGCTCCT	5'	Diff	gp2b	...((.....((..(((..(((((.(((........................))).)))))..)))..)).....))...	74	37.5	-14.4	0.5	42.5	7	27.5	24.5	19.5	0	0	0	85.5	8.5	3	15.5	5	12.5	16.5	27.5	27	35	17.5	9	12	32	62.5	26.5	30	25.5
19	18	ptc-miR159d_L-1	TTGGATTGAAGGGAGCTCCT	20	arahy.Tifrunner.gnm1.Arahy.05	-	99283383	99283417	aTTGGATTGAAAGGAGCTCCTtcttcttaaccgca	5	ptc-MIR159d,ath-MIR159c,aly-MIR159c,cme-MIR159b,cas-MIR159a,	ptc-MIR159d	ttgtaaatttgggagctttctttggttcaaaatgaggaaagaaagtgggtatactcgtctgcttgttcatggatacctctgggttgcgcaggatatattagttagggctacagcttaagggtttgcatggccaaggagacgttgcctgccttctcctttcgtttCTTGGATTGAAGGGAGCTCCTacatgtatc	ptc-miR159d	CTTGGATTGAAGGGAGCTCCT	5'	Diff	gp2b	...((.((((((((((...)))))).))))))...	29	42.9	-5.9	0.4	3	0	0	0	0	0	0	0	0	0	0	0	0	0	0	3	0	5.5	0	3	0	2.5	3	0	0	2.5
20	19	mtr-miR159a_2ss19CT21AT	TTTGGATTGAAGGGAGCTTTT	21	arahy.Tifrunner.gnm1.Arahy.07	+	8802505	8802664	ttctggagattaaggttctttctcaggggtttgacaatcaaagatctcttccatggatgacaccaattctcatattcttctagtgacacttctatgctcggcTTTGGATTGAAGGGAGCTTTTgtttttggactaccatcaaaggactcattctccaaca	21	mtr-MIR159a,gma-MIR159a,gma-MIR159e,pvu-MIR159a,ptc-MIR159b,ptc-MIR159a,ath-MIR159a,ath-MIR159b,ath-MIR159c,aly-MIR159a,aly-MIR159b,aly-MIR159c,lus-MIR159c,lus-MIR159b,fve-MIR159b,bra-MIR159a,bna-MIR159,cas-MIR159b,cas-MIR159c,cas-MIR159a,cpa-MIR159a,	mtr-MIR159a	ggggtggagcttcctttagtccaaatatggatcttgctatgttgatagagctgcttagctatgggtccctcaactctacccatcttgttctttgtggtagttttgtggcttccatatctagggagccttatcacctttagtttaatctttcTTTGGATTGAAGGGAGCTCTAcatcttgctct	mtr-miR159a	TTTGGATTGAAGGGAGCTCTA	3'	Diff	gp2b	...((((((....((((((((....((((((..(.((..((((.(((((((..(((......)))..........(((...(((((((......)).)).)))..)))..))))))).))))..)).)..)))).))...))))))))...))))))...	154	40.6	-38.5	0.6	613	342	721.5	733.5	496.5	84	74	168.5	1351	428	310.5	365	380	470	838	343.5	563	522	233	224	267	667	503.5	625	578.5	396.5
21	20	ath-miR159c	TTTGGATTGAAGGGAGCTCCT	21	arahy.Tifrunner.gnm1.Arahy.10	-	6514741	6514816	tctgcTTTGGATTGAAGGGAGCTGCTttgccagcaccatcttcagagacctcctctaacgtatagtcctcagccac	3	ath-MIR159c,aly-MIR159c,cas-MIR159a,	ath-MIR159c	gtgtaacagaaggagctcccttcctccaaaacgaagaggacaagatttgaggaactaaaatgcagaatctaagagttcatgtcttcctcatagagagtgcgcggtgttaaaagcttgaagaaagcacactttaaggggattgcacgacctcttagattctccctctttctctacatatcattctcttctcttcgTTTGGATTGAAGGGAGCTCCTtttcttcttc	ath-miR159c	TTTGGATTGAAGGGAGCTCCT	5'	Yes	gp2b	...(((..((((((...((.((((......)))).))......((((.....))))......))))))..)))...	70	51.3	-19.8	0.5	114.5	19	58	39	42	3	4	6.5	75	13	15	18.5	16	23	29.5	45.5	30	75	48	48	60	33.5	136.5	28.5	41	51.5
22	21	aqc-miR159_L-1	TTGGACTGAAGGGAGCTCTA	20	arahy.Tifrunner.gnm1.Arahy.10	-	11213301	11213424	atcctccttttgttcttccttattgggtgacttactgtttttacccaactcgagatatggaccatctatgtcaacatatgccttttgtgcctacgtcacagctcTTGGAATGAAGGGAGCTCTA	1	aqc-MIR159,	aqc-MIR159	ggagtctttccagcccaaaacagcttcttgatcttcttgaaaacttctgTTTGGACTGAAGGGAGCTCTAa	aqc-miR159	TTTGGACTGAAGGGAGCTCTA	3'	Diff	gp2b	...(((((((..((((......((((((((..........)))))))).....(((((((.....)))))))............((((((....).))))).....))))..))))))).....	116	42.7	-32.2	0.6	0	0	2.5	0	2.5	0	0	0	0	0	0	0	0	0	0	0	0	4	0	0	0	4	0	0	0	0
23	21	aqc-miR159_L-1	TTGGACTGAAGGGAGCTCTA	20	arahy.Tifrunner.gnm1.Arahy.11	+	33775645	33775693	ataagcccctcgtgcctgagccatagctcTTGGAATGAAGGGAGCTCTA	1	aqc-MIR159,	aqc-MIR159	ggagtctttccagcccaaaacagcttcttgatcttcttgaaaacttctgTTTGGACTGAAGGGAGCTCTAa	aqc-miR159	TTTGGACTGAAGGGAGCTCTA	3'	Diff	gp2b	...((((((((((.((.((((....))))..)).))).)))).)))...	43	53.1	-19.6	0.8	0	0	2.5	0	2.5	0	0	0	0	0	0	0	0	0	0	0	0	4	0	0	0	4	0	0	0	0
24	22	vvi-miR159a_L+1_2ss9TG21TG	CCTTGGAGGGAAGGGAGCTCGC	22	arahy.Tifrunner.gnm1.Arahy.11	+	17392257	17392285	gttttcaCCTTGGAGGGAAGGGAGCTCGC	2	vvi-MIR159a,vvi-MIR159b,	vvi-MIR159b	gggcttgtgggagcttctttacactccagaactgaaaggagatactactgctggttcatgaaaacctatggctgcattctctatactgaaattttgtatacaaactatgggtttgcatgaacttggagaagtgtttgcttttatcttttctggcCTTGGAGTGAAGGGAGCTCTCataaccgatc	vvi-miR159a	CTTGGAGTGAAGGGAGCTCTC	3'	Diff	gp2b	(((..(.(((....)))..)..)))....	25	58.6	-5.9	0.3	9.5	7	6.5	12.5	4	0	0	0	19	0	3	7	7.5	4.5	10.5	6.5	6.5	5	8	6	4	11	10.5	6	7.5	0
25	22	vvi-miR159a_L+1_2ss9TG21TG	CCTTGGAGGGAAGGGAGCTCGC	22	arahy.Tifrunner.gnm1.Arahy.11	-	17392990	17393060	caattctcataaaagagtgcgaaagaaccatcggagcgagatgttttcaCCTTGGAGGGAAGGGAGCTCGC	2	vvi-MIR159a,vvi-MIR159b,	vvi-MIR159b	gggcttgtgggagcttctttacactccagaactgaaaggagatactactgctggttcatgaaaacctatggctgcattctctatactgaaattttgtatacaaactatgggtttgcatgaacttggagaagtgtttgcttttatcttttctggcCTTGGAGTGAAGGGAGCTCTCataaccgatc	vvi-miR159a	CTTGGAGTGAAGGGAGCTCTC	3'	Diff	gp2b	..(((((......))))).(((........)))..(((((....((((.((.....))))))....)))))	36	49.3	-14.1	0.4	9.5	7	6.5	12.5	4	0	0	0	19	0	3	7	7.5	4.5	10.5	6.5	6.5	5	8	6	4	11	10.5	6	7.5	0
26	23	lus-miR159b_1ss9GT	TTTGGATTTAAGGGAGCTCTC	21	arahy.Tifrunner.gnm1.Arahy.11	-	99063127	99063179	acaggagacgcatgcttgggtctttataTTTGGATTTAAGCGAGCTCTCtcaa	1	lus-MIR159b,	lus-MIR159b	aagagagctcctttgggtccaaacagagggtgtggatagggtgagatggaagctgctgagctatggattccacaaccccacccttttgattattgatccggtgggttgtggctcgttttgcatatctcaggagcctccgttccctgttttcttctcttccctccTTTGGATTGAAGGGAGCTCTCtt	lus-miR159b	TTTGGATTGAAGGGAGCTCTC	3'	Diff	gp2b	...(((((.((..((((..((((........))))..))))..)))))))...	47	43.4	-18.9	0.8	0	51	0	0	0	17	18	0	56	44	0	0	0	58	0	0	35	0	0	0	0	230	0	31	0	0
27	24	ptc-MIR159d-p5_2ss9GT20CT	CTTGGATTTAAGGGAGCTCT	20	arahy.Tifrunner.gnm1.Arahy.14	+	93497048	93497109	cttggtaattCTTGTATTTAAGGGAGCTCTagtttgagttctagttaggtttcattaccaat	5	ptc-MIR159d,mdm-MIR159a,mdm-MIR159c,mdm-MIR159b,cpa-MIR159b,	ptc-MIR159d	ttgtaaatttgggagctttctttggttcaaaatgaggaaagaaagtgggtatactcgtctgcttgttcatggatacctctgggttgcgcaggatatattagttagggctacagcttaagggtttgcatggccaaggagacgttgcctgccttctcctttcgtttCTTGGATTGAAGGGAGCTCCTacatgtatc	ptc-MIR159d-p5	CTTGGATTGAAGGGAGCTCC	5'	New	gp2b	.((((((((......(..(((.(((((((......)))))))..)))..)...)))))))).	60	33.9	-17.2	0.8	0	0	0	0	0	0	0	0	0	6	0	0	0	7	0	0	0	0	0	0	0	18	0	0	0	0
28	25	ath-miR159c_L-1R+2_1ss20CT	TTGGATTGAAGGGAGCTCTTTT	22	arahy.Tifrunner.gnm1.Arahy.15	-	27810635	27810703	cacggctcTTGGAATGAAGGGAGCTCTTTTtggaaaatcacgtcaagagcttcctcgaccactgcccct	4	ath-MIR159c,aly-MIR159c,lus-MIR159b,cas-MIR159a,	ath-MIR159c	gtgtaacagaaggagctcccttcctccaaaacgaagaggacaagatttgaggaactaaaatgcagaatctaagagttcatgtcttcctcatagagagtgcgcggtgttaaaagcttgaagaaagcacactttaaggggattgcacgacctcttagattctccctctttctctacatatcattctcttctcttcgTTTGGATTGAAGGGAGCTCCTtttcttcttc	ath-miR159c	TTTGGATTGAAGGGAGCTCCT	5'	Diff	gp2b	...(((...(((..((.(((((((((((..((........))..))))))))))))).)))..)))...	63	52.2	-25.4	0.7	45	36	55	64.5	32	5	0	0	92	36	13	37	35	41	67	26	54	40	17	15	15	65	36	51	31	11
29	26	ath-miR159b-3p_1ss7TA	TTTGGAATGAAGGGAGCTCTT	21	arahy.Tifrunner.gnm1.Arahy.15	-	126962756	126962839	tgtgtgtcaacataagcgttttgtgtttaggctacaaccTTTGGAATGAAGGAAGCTCTTtctgaaaaattgtgtcgatacctt	5	ath-MIR159b,aly-MIR159b,lus-MIR159c,cas-MIR159c,cas-MIR159b,	ath-MIR159b	ggaaGAGCTCCTTGAAGTTCAATGGagggtttagcagggtgaagtaaagctgctaagctatggatcccataagccttatcaaattcaatataattgatgataaggttttttttatggatgccatatctcaggagctttcacttacccctttaatggcttcactcttcTTTGGATTGAAGGGAGCTCTTcatctctc	ath-miR159b-3p	TTTGGATTGAAGGGAGCTCTT	3'	Diff	gp2b	...(((((.((((((...((((......(((((....(((((.....))))).))).))....))))..)))))).)))))...	78	38.1	-17.5	0.5	17.5	0	12	29	17.5	0	0	2.5	31.5	4.5	3	20.5	7.5	11	14.5	6	13	6.5	4	3.5	4.5	15	14	24.5	5.5	4.5
30	27	ath-miR159c_1ss19CT	TTTGGATTGAAGGGAGCTTCT	21	arahy.Tifrunner.gnm1.Arahy.16	+	150625107	150625200	ttctatgctcggcTTTGGATTGAAGGGAGCTTCTgtttctggactagcatcaaaggactccttttccagcacgtattcctcagcgaccatatct	8	ath-MIR159c,ath-MIR159b,aly-MIR159c,aly-MIR159b,lus-MIR159c,cas-MIR159a,cas-MIR159b,cas-MIR159c,	ath-MIR159c	gtgtaacagaaggagctcccttcctccaaaacgaagaggacaagatttgaggaactaaaatgcagaatctaagagttcatgtcttcctcatagagagtgcgcggtgttaaaagcttgaagaaagcacactttaaggggattgcacgacctcttagattctccctctttctctacatatcattctcttctcttcgTTTGGATTGAAGGGAGCTCCTtttcttcttc	ath-miR159c	TTTGGATTGAAGGGAGCTCCT	5'	Diff	gp2b	...((((.((.(((..(((..((((....)))).((..(((((........(((((...)))))))))).))....)))..))))).))))...	88	46.8	-20.9	0.5	14.5	14	13	24.5	10	0	0	0	47.5	3.5	6	10.5	10.5	4	24.5	8.5	21	9.5	5.5	10	8	43	18	26	13.5	8.5
31	28	ath-miR159c_2ss3TA20CT	TTAGGATTGAAGGGAGCTCTT	21	arahy.Tifrunner.gnm1.Arahy.18	+	29719334	29719391	ccgaggttggTTAGGATTGAAGGAAGCTCTTtttcagttaaacgcctaccgacttgat	8	ath-MIR159c,ath-MIR159b,aly-MIR159b,aly-MIR159c,lus-MIR159c,cas-MIR159a,cas-MIR159c,cas-MIR159b,	ath-MIR159c	gtgtaacagaaggagctcccttcctccaaaacgaagaggacaagatttgaggaactaaaatgcagaatctaagagttcatgtcttcctcatagagagtgcgcggtgttaaaagcttgaagaaagcacactttaaggggattgcacgacctcttagattctccctctttctctacatatcattctcttctcttcgTTTGGATTGAAGGGAGCTCCTtttcttcttc	ath-miR159c	TTTGGATTGAAGGGAGCTCCT	5'	Diff	gp2b	...((((((((.(((((((((..(.....)..))))))......)))))))))))...	52	44.8	-15.6	0.6	39	5.5	36	66	43.5	0	0	6	91	5.5	16	17.5	15.5	24.5	29.5	13.5	20.5	23	6.5	13	7.5	30.5	31.5	61.5	18.5	25.5
32	29	ath-miR159b-3p_L-1R+1_1ss19CT	TTGGATTGAAGGGAGCTTTTT	21	arahy.Tifrunner.gnm1.Arahy.19	-	24012705	24012834	cgtttgggccacaggtcTTGGAATGAAGGGAGCTTTTTctagaaaattatgtcgaggccttcctcgaccattgtcctttctagcaactcattgtctgtagtcttctcttttttgggccctggtccaattt	10	ath-MIR159b,ath-MIR159c,aly-MIR159b,aly-MIR159c,lus-MIR159c,lus-MIR159b,cas-MIR159b,cas-MIR159c,cas-MIR159a,aqc-MIR159,	ath-MIR159b	ggaaGAGCTCCTTGAAGTTCAATGGagggtttagcagggtgaagtaaagctgctaagctatggatcccataagccttatcaaattcaatataattgatgataaggttttttttatggatgccatatctcaggagctttcacttacccctttaatggcttcactcttcTTTGGATTGAAGGGAGCTCTTcatctctc	ath-miR159b-3p	TTTGGATTGAAGGGAGCTCTT	5'	Diff	gp2b	...((((((((..(((((......((((((((......(((((((...(((((((((....)))))).))).....)))))))..(((((.....)).))).))))))))...))))).))))))))...	124	45.4	-40	0.7	3	2.5	5	7	2.5	0	0	0	18	2.5	2.5	5.5	3	3.5	6	0	4	9.5	0	0	0	0	2.5	0	2.5	3
33	30	mtr-miR159a_R-1_1ss20TC	TTTGGATTGAAGGGAGCTCC	20	arahy.Tifrunner.gnm1.Arahy.19	-	128476496	128476620	cTTTGGATTGAAGGGAGCTGCtttgtcggcaccgtcttcagagacctcctcaacatatagtcctccgccaccatctgaacaatttcttccggtgaaagagacgttcctgcacctcccatcaagag	18	mtr-MIR159a,gma-MIR159a,gma-MIR159e,pvu-MIR159a,ath-MIR159a,ath-MIR159b,ath-MIR159c,aly-MIR159a,aly-MIR159b,aly-MIR159c,lus-MIR159c,lus-MIR159b,fve-MIR159c,bra-MIR159a,bna-MIR159,cas-MIR159b,cas-MIR159c,cas-MIR159a,	mtr-MIR159a	ggggtggagcttcctttagtccaaatatggatcttgctatgttgatagagctgcttagctatgggtccctcaactctacccatcttgttctttgtggtagttttgtggcttccatatctagggagccttatcacctttagtttaatctttcTTTGGATTGAAGGGAGCTCTAcatcttgctct	mtr-miR159a	TTTGGATTGAAGGGAGCTCTA	5'	Diff	gp2b	.......((((.(((((.(((......((...((((((..(((.....))).................((((....(((....)))....))))...))))))..)).))).))))).))))...	115	51.2	-29.9	0.5	763.5	158.5	318	318	310.5	36	30	40	491	76.5	107.5	141	122.5	158.5	138.5	324.5	287.5	504.5	312.5	231	260	363.5	882.5	174.5	536	510
34	31	cme-MIR160c-p5_2ss13AG17AG	AGCCATGCATGTGTAAGT	18	arahy.Tifrunner.gnm1.Arahy.01	+	66790347	66790478	AGCCATGCATGTGTAAGTatgaactaattcagactgtgaaactgcgaatggctcattaaatcagttatagtttgtttgatggtacctactactcggataaccgtagtaattctagagctaatacgtgcaaca	1	cme-MIR160c,	cme-MIR160c	tcatcgtaaTGCCTGGCTCCCTGTATGCCAtttgcaaagcccatcatctaaaaataggtggccttctcgaatggcatgcaaggagccatgcatgtataaatt	cme-MIR160c-p5	agccatgcatgtataaat	5'	New	gp2b	.....(((((((((.(((....((((...(((((((((..((((..((((...))))....))))))))))))).....))))......(((((((....))).))))........))).)))))))))...	124	37.9	-32.6	0.7	4	6	0	2.5	3	6	15.5	6.5	7	0	0	13.5	3.5	2.5	6.5	0	2.5	4.5	18	6.5	15.5	3	2.5	21.5	4	3
35	31	cme-MIR160c-p5_2ss13AG17AG	AGCCATGCATGTGTAAGT	18	arahy.Tifrunner.gnm1.Arahy.01	+	66857160	66857291	AGCCATGCATGTGTAAGTatgaactaattcagactgtgaaactgcgaatggctcattaaatcagttatagtttgtttgatggtacctactactcggataaccgtagtaattctagagctaatacgtgcaaca	1	cme-MIR160c,	cme-MIR160c	tcatcgtaaTGCCTGGCTCCCTGTATGCCAtttgcaaagcccatcatctaaaaataggtggccttctcgaatggcatgcaaggagccatgcatgtataaatt	cme-MIR160c-p5	agccatgcatgtataaat	5'	New	gp2b	.....(((((((((.(((....((((...(((((((((..((((..((((...))))....))))))))))))).....))))......(((((((....))).))))........))).)))))))))...	124	37.9	-32.6	0.7	4	6	0	2.5	3	6	15.5	6.5	7	0	0	13.5	3.5	2.5	6.5	0	2.5	4.5	18	6.5	15.5	3	2.5	21.5	4	3
36	32	htu-miR160a_R+1_1ss14GA	TGCCTGGCTCCCTATATGCCT	21	arahy.Tifrunner.gnm1.Arahy.05	-	115267680	115267707	tgagcaTGCCTGGCTCCCTGTATGCCTg	1	htu-MIR160a,	htu-MIR160a	gcaTGCCTGGCTCCCTGTATGCCtcctgcaggaaaacaactgctgggggtatgagggttgactgaaaaggacggtggaagggcaaaaccgtct	htu-miR160a	TGCCTGGCTCCCTGTATGCC	3'	Diff	gp2b	...((((((..((...)).))))))...	22	60.7	-7.4	0.4	16.5	3.5	2.5	16.5	7	0	0	0	11.5	3	0	0	6	3	9.5	6.5	10.5	8	4.5	5.5	10	11	20.5	15.5	8	6.5
37	33	htu-miR160a_R+1	TGCCTGGCTCCCTGTATGCCT	21	arahy.Tifrunner.gnm1.Arahy.08	+	28779334	28779365	TGCCTGGCTCCCTGTATGCCTgcaggagcatt	1	htu-MIR160a,	htu-MIR160a	gcaTGCCTGGCTCCCTGTATGCCtcctgcaggaaaacaactgctgggggtatgagggttgactgaaaaggacggtggaagggcaaaaccgtct	htu-miR160a	TGCCTGGCTCCCTGTATGCC	5'	Diff	gp2b	......(((.((((((....)))))))))...	23	59.4	-11.5	0.6	62.5	38.5	48	61	53.5	11	5	11.5	116	28	28.5	31	29.5	48.5	59.5	30.5	67.5	51	29	25.5	44	65.5	74.5	71	30	45
38	33	htu-miR160a_R+1	TGCCTGGCTCCCTGTATGCCT	21	arahy.Tifrunner.gnm1.Arahy.18	+	4502032	4502063	TGCCTGGCTCCCTGTATGCCTgcaggagcatt	1	htu-MIR160a,	htu-MIR160a	gcaTGCCTGGCTCCCTGTATGCCtcctgcaggaaaacaactgctgggggtatgagggttgactgaaaaggacggtggaagggcaaaaccgtct	htu-miR160a	TGCCTGGCTCCCTGTATGCC	5'	Diff	gp2b	......(((.((((((....)))))))))...	23	59.4	-11.5	0.6	62.5	38.5	48	61	53.5	11	5	11.5	116	28	28.5	31	29.5	48.5	59.5	30.5	67.5	51	29	25.5	44	65.5	74.5	71	30	45
39	34	csi-miR160c-5p_R+1	TGCCTGGCTCCCTGTATGCTTT	22	arahy.Tifrunner.gnm1.Arahy.09	+	118837647	118837691	TGCCTGGCTCCCTGTATGCCTTgaagatcttgaatggtggagaat	1	csi-MIR160c,	csi-MIR160c	tgatatatagtaTGCCTGGCTCCCTGTATGCTTtttgcaaagcccatcagaagattggtggtcttggcggataGCGTGCGAGGAGCCATGCATGctaaatttag	csi-miR160c-5p	TGCCTGGCTCCCTGTATGCTT	5'	Diff	gp2b	.......((((......(((((.((....)).)).)))))))...	35	48.9	-6.1	0.3	0	0	2.5	6	4.5	0	0	0	0	0	0	0	0	0	3	0	2.5	0	0	0	0	3	3	4	2.5	0
40	35	csi-miR160c-5p	TGCCTGGCTCCCTGTATGCTT	21	arahy.Tifrunner.gnm1.Arahy.15	-	160316406	160316489	tcagatggagacagatcaagaagttgagcaTGCCTGGCTCCCTGTATGCCTgcaatactgttattctcttgaatgttcatcaat	1	csi-MIR160c,	csi-MIR160c	tgatatatagtaTGCCTGGCTCCCTGTATGCTTtttgcaaagcccatcagaagattggtggtcttggcggataGCGTGCGAGGAGCCATGCATGctaaatttag	csi-miR160c-5p	TGCCTGGCTCCCTGTATGCTT	5'	Yes	gp2b	...((((..((((..((((((.(...(((((((..(((.........))).)))....))))...))))))).))))))))...	78	42.9	-21.5	0.6	4	3.5	0	3.5	0	0	0	0	5	0	0	0	3	0	3	2.5	3	2.5	0	0	0	2.5	4	5	2.5	2.5
41	36	csi-miR160c-5p_2ss14GA20TC	TGCCTGGCTCCCTATATGCCT	21	arahy.Tifrunner.gnm1.Arahy.19	-	146578045	146578123	atccatcaagaatgtggaaatcttgcggagcgagcccgaattgatgggcaTGCCTGGCTCCCTGTATGCCTtgatgatc	2	csi-MIR160c,htu-MIR160a,	csi-MIR160c	tgatatatagtaTGCCTGGCTCCCTGTATGCTTtttgcaaagcccatcagaagattggtggtcttggcggataGCGTGCGAGGAGCCATGCATGctaaatttag	csi-miR160c-5p	TGCCTGGCTCCCTGTATGCTT	3'	Diff	gp2b	...(((((((.(((..(.........(((((.((((((......))))).....).))))))..)))..)))))))...	73	51.9	-24.7	0.6	16.5	3.5	2.5	16.5	7	0	0	0	11.5	3	0	0	6	3	9.5	6.5	10.5	8	4.5	5.5	10	11	20.5	15.5	8	6.5
42	37	mtr-miR164a_R-3	TGGAGAAGCAGGGCACGT	18	arahy.Tifrunner.gnm1.Arahy.01	+	110960707	110960857	ggaacatcaattggatTGGAGAAGCAGGGCACGTaaggcgattcgtcatggatggtgtcgaaagagggcgaggtctccgtcaagggaggtagaccggaagaatccaattcggttcggaaagtgtcgagcctcatgattccagagatgtgaa	77	mtr-MIR164c,mtr-MIR164a,mtr-MIR164b,gma-MIR164i,gma-MIR164g,gma-MIR164d,gma-MIR164a,gma-MIR164e,gma-MIR164j,gma-MIR164b,gma-MIR164f,gma-MIR164k,gma-MIR164h,gma-MIR164c,ptc-MIR164e,ptc-MIR164a,ptc-MIR164b,ptc-MIR164c,ptc-MIR164d,ath-MIR164b,ath-MIR164a,ath-MIR164c,mdm-MIR164f,mdm-MIR164d,mdm-MIR164c,mdm-MIR164b,mdm-MIR164e,aly-MIR164c,aly-MIR164b,aly-MIR164a,ppe-MIR164c,ppe-MIR164a,ppe-MIR164b,mes…	mtr-MIR164b	caagaTGGAGAAGCAGGGCACGTGCAatactaactcatgaacatacacacatgatggaagtgaatacaaagagaatctacattctcttatgtttcatttttttaattgagttagttcttcatgtgcccctcttccccatcatga	mtr-miR164a	TGGAGAAGCAGGGCACGTGCA	5'	Diff	gp2b	...(((((..(((((...(((..((..(((((......(((..((...(((((.((.((....))..))..(((((((.((....)))).)))))......)))))...))..)))....)))))..))))).....))))).)))))...	145	51.7	-44	0.6	2.5	5.5	0	3	0	0	0	0	7.5	3	0	3	0	4	2.5	3	0	0	0	0	0	6	7.5	6	3.5	0
43	37	mtr-miR164a_R-3	TGGAGAAGCAGGGCACGT	18	arahy.Tifrunner.gnm1.Arahy.08	+	51201444	51201472	TGGAGAAGCAGGGCACGTaaggtgctgta	77	mtr-MIR164c,mtr-MIR164a,mtr-MIR164b,gma-MIR164i,gma-MIR164g,gma-MIR164d,gma-MIR164a,gma-MIR164e,gma-MIR164j,gma-MIR164b,gma-MIR164f,gma-MIR164k,gma-MIR164h,gma-MIR164c,ptc-MIR164e,ptc-MIR164a,ptc-MIR164b,ptc-MIR164c,ptc-MIR164d,ath-MIR164b,ath-MIR164a,ath-MIR164c,mdm-MIR164f,mdm-MIR164d,mdm-MIR164c,mdm-MIR164b,mdm-MIR164e,aly-MIR164c,aly-MIR164b,aly-MIR164a,ppe-MIR164c,ppe-MIR164a,ppe-MIR164b,mes…	mtr-MIR164b	caagaTGGAGAAGCAGGGCACGTGCAatactaactcatgaacatacacacatgatggaagtgaatacaaagagaatctacattctcttatgtttcatttttttaattgagttagttcttcatgtgcccctcttccccatcatga	mtr-miR164a	TGGAGAAGCAGGGCACGTGCA	5'	Diff	gp2b	...........(((((.....)))))...	15	55.2	-6.1	0.4	2.5	5.5	0	3	0	0	0	0	7.5	3	0	3	0	4	2.5	3	0	0	0	0	0	6	7.5	6	3.5	0
44	38	mtr-miR164a	TGGAGAAGCAGGGCACGTGCA	21	arahy.Tifrunner.gnm1.Arahy.02	+	92621346	92621430	aTGGAGAAGCAGGGCACGTGCAatactaactcatgaagagatcattaataatatgagtgttttttttctatttcaccaacctaaa	68	mtr-MIR164c,mtr-MIR164a,mtr-MIR164b,gma-MIR164i,gma-MIR164g,gma-MIR164d,gma-MIR164a,gma-MIR164e,gma-MIR164j,gma-MIR164b,gma-MIR164f,gma-MIR164k,gma-MIR164h,gma-MIR164c,ptc-MIR164e,ptc-MIR164a,ptc-MIR164b,ptc-MIR164c,ptc-MIR164d,ath-MIR164b,ath-MIR164a,mdm-MIR164f,mdm-MIR164d,mdm-MIR164c,mdm-MIR164b,mdm-MIR164e,aly-MIR164b,aly-MIR164a,ppe-MIR164c,ppe-MIR164a,ppe-MIR164b,mes-MIR164b,mes-MIR164c,mes…	mtr-MIR164b	caagaTGGAGAAGCAGGGCACGTGCAatactaactcatgaacatacacacatgatggaagtgaatacaaagagaatctacattctcttatgtttcatttttttaattgagttagttcttcatgtgcccctcttccccatcatga	mtr-miR164a	TGGAGAAGCAGGGCACGTGCA	5'	Yes	gp2b	((((((((..(..((((............(((.....))).((((.......))))))))..)))))))))..............	71	34.1	-12.1	0.4	3596.5	2666.5	2823.5	4643.5	2709.5	708.5	534	1205	5245.5	2037.5	1524.5	1829	1370	2668	3917.5	2055.5	3165.5	2191.5	1526	1346	1405.5	3373	3202.5	4220	2118.5	1494
45	38	mtr-miR164a	TGGAGAAGCAGGGCACGTGCA	21	arahy.Tifrunner.gnm1.Arahy.12	+	107457285	107457327	agggtgcatgctgagcaagaTGGAGAAGCAGGGCACGTGCAat	77	mtr-MIR164c,mtr-MIR164a,mtr-MIR164b,gma-MIR164i,gma-MIR164g,gma-MIR164d,gma-MIR164a,gma-MIR164e,gma-MIR164j,gma-MIR164b,gma-MIR164f,gma-MIR164k,gma-MIR164h,gma-MIR164c,ptc-MIR164e,ptc-MIR164a,ptc-MIR164b,ptc-MIR164c,ptc-MIR164d,ath-MIR164b,ath-MIR164a,ath-MIR164c,mdm-MIR164f,mdm-MIR164d,mdm-MIR164c,mdm-MIR164b,mdm-MIR164e,aly-MIR164b,aly-MIR164a,aly-MIR164c,ppe-MIR164c,ppe-MIR164a,ppe-MIR164b,mes…	mtr-MIR164b	caagaTGGAGAAGCAGGGCACGTGCAatactaactcatgaacatacacacatgatggaagtgaatacaaagagaatctacattctcttatgtttcatttttttaattgagttagttcttcatgtgcccctcttccccatcatga	mtr-miR164a	TGGAGAAGCAGGGCACGTGCA	3'	Yes	gp2b	...((((.((((..............))))..)))).......	33	55.8	-10.3	0.4	3596.5	2666.5	2823.5	4643.5	2709.5	708.5	534	1205	5245.5	2037.5	1524.5	1829	1370	2668	3917.5	2055.5	3165.5	2191.5	1526	1346	1405.5	3373	3202.5	4220	2118.5	1494
46	39	mtr-MIR164b-p5_2	TCATGTGCCCCTCTTCCCCAT	21	arahy.Tifrunner.gnm1.Arahy.04	+	105451327	105451392	TCATGTGCCCCTCTTCCCCATcatgatgacagcacctgaaatattatagcatttggaaatgggaaa	5	mtr-MIR164b,gma-MIR164i,mdm-MIR164f,mdm-MIR164e,ppe-MIR164a,	mtr-MIR164b	caagaTGGAGAAGCAGGGCACGTGCAatactaactcatgaacatacacacatgatggaagtgaatacaaagagaatctacattctcttatgtttcatttttttaattgagttagttcttcatgtgcccctcttccccatcatga	mtr-MIR164b-p5	tcatgtgcccctcttccccat	5'	New	gp2b	........(((..((((.....((((((.(((...)))...)))))).......))))..)))...	55	42.4	-9.9	0.4	16.5	13.5	20.5	25	10	0	0	0	31.5	18.5	10	8.5	6.5	12	12	8	15	9.5	0	4	0	20.5	18.5	20	7	5
47	40	mtr-MIR164b-p5_1	CATGTGCCCCTCTTCCCCATC	21	arahy.Tifrunner.gnm1.Arahy.04	+	105451328	105451392	CATGTGCCCCTCTTCCCCATCatgatgacagcacctgaaatattatagcatttggaaatgggaaa	5	mtr-MIR164b,gma-MIR164i,mdm-MIR164f,mdm-MIR164e,ppe-MIR164a,	mtr-MIR164b	caagaTGGAGAAGCAGGGCACGTGCAatactaactcatgaacatacacacatgatggaagtgaatacaaagagaatctacattctcttatgtttcatttttttaattgagttagttcttcatgtgcccctcttccccatcatga	mtr-MIR164b-p5	catgtgcccctcttccccatc	5'	New	gp2b	.......(((..((((.....((((((.(((...)))...)))))).......))))..)))...	55	43.1	-9.9	0.4	16.5	13.5	20.5	25	10	0	0	0	31.5	18.5	10	8.5	6.5	12	12	8	15	9.5	0	4	0	20.5	18.5	20	7	5
48	40	mtr-MIR164b-p5_1	CATGTGCCCCTCTTCCCCATC	21	arahy.Tifrunner.gnm1.Arahy.14	+	115911432	115911490	agttagttcttCATGTGCCCCTCTTCCCCATCatgatgacagcacctgaaatattatag	5	mtr-MIR164b,gma-MIR164i,mdm-MIR164f,mdm-MIR164e,ppe-MIR164a,	mtr-MIR164b	caagaTGGAGAAGCAGGGCACGTGCAatactaactcatgaacatacacacatgatggaagtgaatacaaagagaatctacattctcttatgtttcatttttttaattgagttagttcttcatgtgcccctcttccccatcatga	mtr-MIR164b-p5	catgtgcccctcttccccatc	5'	New	gp2b	...((((..((((.((((...((.((........)).))..)))).))))..))))...	53	42.4	-9.7	0.4	16.5	13.5	20.5	25	10	0	0	0	31.5	18.5	10	8.5	6.5	12	12	8	15	9.5	0	4	0	20.5	18.5	20	7	5
49	41	mtr-MIR164b-p5_3	TCATGTGCCCCTCTTCCCCATC	22	arahy.Tifrunner.gnm1.Arahy.12	+	107457601	107457646	agttagttctTCATGTGCCCCTCTTCCCCATCatgacctgctgcac	5	mtr-MIR164b,gma-MIR164i,mdm-MIR164f,mdm-MIR164e,ppe-MIR164a,	mtr-MIR164b	caagaTGGAGAAGCAGGGCACGTGCAatactaactcatgaacatacacacatgatggaagtgaatacaaagagaatctacattctcttatgtttcatttttttaattgagttagttcttcatgtgcccctcttccccatcatga	mtr-MIR164b-p5	tcatgtgcccctcttccccatc	5'	New	gp2b	.(.((((...(((((((...........)).)))))...)))))..	43	52.2	-5.6	0.2	16.5	13.5	20.5	25	10	0	0	0	31.5	18.5	10	8.5	6.5	12	12	8	15	9.5	0	4	0	20.5	18.5	20	7	5
50	42	mtr-miR166g-5p_1ss9GT	GGAATGTTTTCTGGCTCGAGG	21	arahy.Tifrunner.gnm1.Arahy.06	-	1985275	1985398	ggccgggaaagttttgttttgttgaggGGAATGTTGTCTGGCTCGAGGacccttcccttctctaaatgaaataagagtcgTCGGACCAGGCTTCATTCCccccaattactcgctttcaccgatt	182	mtr-MIR166g,mtr-MIR166e,mtr-MIR166b,mtr-MIR166a,mtr-MIR166c,mtr-MIR166f,mtr-MIR166d,gma-MIR166b,gma-MIR166a,gma-MIR166c,gma-MIR166l,gma-MIR166u,gma-MIR166n,gma-MIR166m,gma-MIR166o,gma-MIR166q,gma-MIR166t,gma-MIR166d,gma-MIR166r,gma-MIR166g,gma-MIR166e,gma-MIR166i,gma-MIR166p,gma-MIR166s,gma-MIR166j,gma-MIR166f,gma-MIR166k,gma-MIR166h,lja-MIR166,pvu-MIR166a,ptc-MIR166a,ptc-MIR166j,ptc-MIR166k,ptc-…	mtr-MIR166g	tttgaggGGAATGTTGTCTGGCTCGAGGacgctttcttctcgatctaatgcaaatttgtggtcatggattgtaaagtattcTCGGACCAGGCTTCATTCCCCccaat	mtr-miR166g-5p	GGAATGTTGTCTGGCTCGAGG	5'	Diff	gp2b	...(((((((((...((...((((.((((((((..((((((..(((.(((.(((...(((.......)))..))).))).)))..))))))..)))))))).)))).))..)))))).)))...	118	49.2	-53	0.9	571.5	1342	344.5	564.5	244	278.5	219	21.5	1752	1299	41	109.5	87.5	1871.5	486	240.5	733.5	370	142.5	120	196.5	2394.5	646	702.5	318	171.5
50	43	mtr-miR166a_R-2_1ss9GT	TCGGACCATGCTTCATTCC	19	arahy.Tifrunner.gnm1.Arahy.06	-	1985275	1985398	ggccgggaaagttttgttttgttgaggGGAATGTTGTCTGGCTCGAGGacccttcccttctctaaatgaaataagagtcgTCGGACCAGGCTTCATTCCccccaattactcgctttcaccgatt	182	mtr-MIR166g,mtr-MIR166e,mtr-MIR166b,mtr-MIR166a,mtr-MIR166c,mtr-MIR166f,mtr-MIR166d,gma-MIR166b,gma-MIR166a,gma-MIR166c,gma-MIR166l,gma-MIR166u,gma-MIR166n,gma-MIR166m,gma-MIR166o,gma-MIR166q,gma-MIR166t,gma-MIR166d,gma-MIR166r,gma-MIR166g,gma-MIR166e,gma-MIR166i,gma-MIR166p,gma-MIR166s,gma-MIR166j,gma-MIR166f,gma-MIR166k,gma-MIR166h,lja-MIR166,pvu-MIR166a,ptc-MIR166a,ptc-MIR166j,ptc-MIR166k,ptc-…	mtr-MIR166a	cagacatacgaaggagttcaggggaatggtgtctgattcgagaccattcgtcacaagtaaacagtagccttgagaatgatcTCGGACCAGGCTTCATTCCCCctagctcatagtatcatgc	mtr-miR166a	TCGGACCAGGCTTCATTCCCC	3'	Diff	gp2b	...(((((((((...((...((((.((((((((..((((((..(((.(((.(((...(((.......)))..))).))).)))..))))))..)))))))).)))).))..)))))).)))...	118	49.2	-53	0.9	232	273.5	156	246	139.5	38.5	38	37	398.5	181	60.5	71.5	75.5	371	159.5	114.5	245	133.5	53.5	66	81.5	643	194	302.5	98.5	120
51	44	mtr-miR166e-5p_2ss8TC10GT	GGAATGTCGTCTGGCTCGAGG	21	arahy.Tifrunner.gnm1.Arahy.08	-	48198182	48198318	tatgcaaaggttatcggttgagaGGAATGTCGTCTGGCTCGAGGtcatataggccgttatcatttagatatttttgtgataacgaccttgttgattcTCGGACCAGGCTTCATTCCCCtcacccaacattttgcttc	188	mtr-MIR166e,mtr-MIR166g,mtr-MIR166b,mtr-MIR166a,mtr-MIR166c,mtr-MIR166f,gma-MIR166t,gma-MIR166b,gma-MIR166d,gma-MIR166r,gma-MIR166e,gma-MIR166u,gma-MIR166s,gma-MIR166n,gma-MIR166j,gma-MIR166f,gma-MIR166k,gma-MIR166h,gma-MIR166o,gma-MIR166q,gma-MIR166a,gma-MIR166c,gma-MIR166g,gma-MIR166i,gma-MIR166p,gma-MIR166m,gma-MIR166l,lja-MIR166,pvu-MIR166a,ptc-MIR166d,ptc-MIR166i,ptc-MIR166f,ptc-MIR166l,ptc-…	mtr-MIR166e	tttgaggGGAATGTTGGCTGGCTCGAGGcttttcagtttcacaaaggaagttcagtcttaattgtatgaactataaggctTCGGACCAGGCTTCATTCCCCtcaaa	mtr-miR166e-5p	GGAATGTTGGCTGGCTCGAGG	5'	Diff	gp2b	...(((((((((...((.((((.((((((..((((((..((((((((...(((.(((((((((..((....))..))))))))).)))...)))).))))..))))))..)))))).)))).))))).))))))...	131	43.8	-59.2	1	320.5	129.5	212.5	362	155.5	4.5	8	9	640.5	116	14	63	56	185	334	112.5	102	188	24.5	13.5	18.5	228	302.5	111	122	66.5
51	45	mtr-miR166a_1ss21CA	TCGGACCAGGCTTCATTCCCA	21	arahy.Tifrunner.gnm1.Arahy.08	-	48198182	48198318	tatgcaaaggttatcggttgagaGGAATGTCGTCTGGCTCGAGGtcatataggccgttatcatttagatatttttgtgataacgaccttgttgattcTCGGACCAGGCTTCATTCCCCtcacccaacattttgcttc	188	mtr-MIR166e,mtr-MIR166g,mtr-MIR166b,mtr-MIR166a,mtr-MIR166c,mtr-MIR166f,gma-MIR166t,gma-MIR166b,gma-MIR166d,gma-MIR166r,gma-MIR166e,gma-MIR166u,gma-MIR166s,gma-MIR166n,gma-MIR166j,gma-MIR166f,gma-MIR166k,gma-MIR166h,gma-MIR166o,gma-MIR166q,gma-MIR166a,gma-MIR166c,gma-MIR166g,gma-MIR166i,gma-MIR166p,gma-MIR166m,gma-MIR166l,lja-MIR166,pvu-MIR166a,ptc-MIR166d,ptc-MIR166i,ptc-MIR166f,ptc-MIR166l,ptc-…	mtr-MIR166a	cagacatacgaaggagttcaggggaatggtgtctgattcgagaccattcgtcacaagtaaacagtagccttgagaatgatcTCGGACCAGGCTTCATTCCCCctagctcatagtatcatgc	mtr-miR166a	TCGGACCAGGCTTCATTCCCC	3'	Diff	gp2b	...(((((((((...((.((((.((((((..((((((..((((((((...(((.(((((((((..((....))..))))))))).)))...)))).))))..))))))..)))))).)))).))))).))))))...	131	43.8	-59.2	1	6328	1819.5	2967	2920.5	2234	350.5	279	521	4480.5	1137.5	1302	1372	1444.5	2338	2333	3889.5	3265	4908.5	2908	3230.5	3991.5	4409	8183.5	3868.5	3526.5	4214.5
52	46	mtr-miR166e-5p_2ss9GT10GT	GGAATGTTTTCTGGCTCGAGG	21	arahy.Tifrunner.gnm1.Arahy.18	-	132438808	132438922	atcggttgagaGGAATGTTGTCTGGCTCGAGGtcgtataggccgttatcatttagatattttcgtgataacgaccttagtgattcTCGGACCAGGCTTCATTCCCCtcacccaac	189	mtr-MIR166e,mtr-MIR166g,mtr-MIR166b,mtr-MIR166a,mtr-MIR166c,mtr-MIR166f,mtr-MIR166d,gma-MIR166a,gma-MIR166c,gma-MIR166m,gma-MIR166t,gma-MIR166b,gma-MIR166d,gma-MIR166r,gma-MIR166e,gma-MIR166u,gma-MIR166s,gma-MIR166n,gma-MIR166j,gma-MIR166f,gma-MIR166k,gma-MIR166h,gma-MIR166o,gma-MIR166q,gma-MIR166g,gma-MIR166i,gma-MIR166p,gma-MIR166l,lja-MIR166,pvu-MIR166a,ptc-MIR166a,ptc-MIR166j,ptc-MIR166k,ptc-…	mtr-MIR166e	tttgaggGGAATGTTGGCTGGCTCGAGGcttttcagtttcacaaaggaagttcagtcttaattgtatgaactataaggctTCGGACCAGGCTTCATTCCCCtcaaa	mtr-miR166e-5p	GGAATGTTGGCTGGCTCGAGG	5'	Diff	gp2b	...((.((((.((((((..((((((..((((((((...(((.(((((((((...((.....))))))))))).)))...)))).))))..))))))..)))))).)))).))...	109	47	-52.5	1	571.5	1342	344.5	564.5	244	278.5	219	21.5	1752	1299	41	109.5	87.5	1871.5	486	240.5	733.5	370	142.5	120	196.5	2394.5	646	702.5	318	171.5
52	45	mtr-miR166a_1ss21CA	TCGGACCAGGCTTCATTCCCA	21	arahy.Tifrunner.gnm1.Arahy.18	-	132438808	132438922	atcggttgagaGGAATGTTGTCTGGCTCGAGGtcgtataggccgttatcatttagatattttcgtgataacgaccttagtgattcTCGGACCAGGCTTCATTCCCCtcacccaac	189	mtr-MIR166e,mtr-MIR166g,mtr-MIR166b,mtr-MIR166a,mtr-MIR166c,mtr-MIR166f,mtr-MIR166d,gma-MIR166a,gma-MIR166c,gma-MIR166m,gma-MIR166t,gma-MIR166b,gma-MIR166d,gma-MIR166r,gma-MIR166e,gma-MIR166u,gma-MIR166s,gma-MIR166n,gma-MIR166j,gma-MIR166f,gma-MIR166k,gma-MIR166h,gma-MIR166o,gma-MIR166q,gma-MIR166g,gma-MIR166i,gma-MIR166p,gma-MIR166l,lja-MIR166,pvu-MIR166a,ptc-MIR166a,ptc-MIR166j,ptc-MIR166k,ptc-…	mtr-MIR166a	cagacatacgaaggagttcaggggaatggtgtctgattcgagaccattcgtcacaagtaaacagtagccttgagaatgatcTCGGACCAGGCTTCATTCCCCctagctcatagtatcatgc	mtr-miR166a	TCGGACCAGGCTTCATTCCCC	3'	Diff	gp2b	...((.((((.((((((..((((((..((((((((...(((.(((((((((...((.....))))))))))).)))...)))).))))..))))))..)))))).)))).))...	109	47	-52.5	1	6328	1819.5	2967	2920.5	2234	350.5	279	521	4480.5	1137.5	1302	1372	1444.5	2338	2333	3889.5	3265	4908.5	2908	3230.5	3991.5	4409	8183.5	3868.5	3526.5	4214.5
53	47	mtr-miR166e-5p_2ss10GT11CT	GGAATGTTGTTTGGCTCGAGG	21	arahy.Tifrunner.gnm1.Arahy.10	+	6288065	6288184	aatgggagattgaggttgatgGGAATGTTGTTTGGCTCGAGGtcacttattgagtagttatataccctttatagtgagatcTCGGACCAGGCTTCATTCCCGtcgacttgatctctctcg	184	mtr-MIR166b,mtr-MIR166e,mtr-MIR166g,mtr-MIR166a,mtr-MIR166c,mtr-MIR166f,gma-MIR166j,gma-MIR166h,gma-MIR166t,gma-MIR166b,gma-MIR166a,gma-MIR166d,gma-MIR166c,gma-MIR166r,gma-MIR166g,gma-MIR166e,gma-MIR166i,gma-MIR166p,gma-MIR166u,gma-MIR166s,gma-MIR166n,gma-MIR166m,gma-MIR166f,gma-MIR166k,gma-MIR166o,gma-MIR166q,lja-MIR166,pvu-MIR166a,ptc-MIR166d,ptc-MIR166a,ptc-MIR166i,ptc-MIR166f,ptc-MIR166l,ptc-…	mtr-MIR166e	tttgaggGGAATGTTGGCTGGCTCGAGGcttttcagtttcacaaaggaagttcagtcttaattgtatgaactataaggctTCGGACCAGGCTTCATTCCCCtcaaa	mtr-miR166e-5p	GGAATGTTGGCTGGCTCGAGG	5'	Diff	gp2b	...((((((((.(((((((((((((((..(..(((..((((((((((......(((......))).......)))))..)))))..)))..)..)))))))))))))))))))))))...	114	45	-55.3	1	2747	1721	2804	4318	2406	320.5	289	424.5	6084	1711.5	996.5	1367.5	949.5	3272.5	3861	1751.5	3048.5	2121	575	585	757	3700.5	2451.5	2467	1827	1204
53	48	mtr-miR166b_2ss20TC21AG	TCGGACCAGGCTTCATTCCCG	21	arahy.Tifrunner.gnm1.Arahy.10	+	6288065	6288184	aatgggagattgaggttgatgGGAATGTTGTTTGGCTCGAGGtcacttattgagtagttatataccctttatagtgagatcTCGGACCAGGCTTCATTCCCGtcgacttgatctctctcg	184	mtr-MIR166b,mtr-MIR166e,mtr-MIR166g,mtr-MIR166a,mtr-MIR166c,mtr-MIR166f,gma-MIR166j,gma-MIR166h,gma-MIR166t,gma-MIR166b,gma-MIR166a,gma-MIR166d,gma-MIR166c,gma-MIR166r,gma-MIR166g,gma-MIR166e,gma-MIR166i,gma-MIR166p,gma-MIR166u,gma-MIR166s,gma-MIR166n,gma-MIR166m,gma-MIR166f,gma-MIR166k,gma-MIR166o,gma-MIR166q,lja-MIR166,pvu-MIR166a,ptc-MIR166d,ptc-MIR166a,ptc-MIR166i,ptc-MIR166f,ptc-MIR166l,ptc-…	mtr-MIR166b	gttgatgggaatgttgtttggctcgaggtaataactaactcaatttctttgtctttgaaagcttttctttgtttcactctttttgattcttagaaagttgaaactaagtgagctttaaaggtttgattttgatgtgtgattatcTCGGACCAGGCTTCATTCCTAccaac	mtr-miR166b	TCGGACCAGGCTTCATTCCTA	3'	Diff	gp2b	...((((((((.(((((((((((((((..(..(((..((((((((((......(((......))).......)))))..)))))..)))..)..)))))))))))))))))))))))...	114	45	-55.3	1	22367	14976	24062	24174	15369.5	2983	2266	3739.5	41632	12218	8498	11753.5	11984	18938	21661	11125.5	19401.5	14178	5177	5147.5	6305	25869.5	15908	28624.5	9962	10980.5
54	49	mtr-miR166g-5p_1ss11CT	GGAATGTTGTTTGGCTCGAGG	21	arahy.Tifrunner.gnm1.Arahy.20	+	11507522	11507641	aatgggagattgaggttgatgGGAATGTTGTTTGGCTCGAGGtcacttattgagtagttgtataccctttataatgagatcTCGGACCAGGCTTCATTCCCGtcgacttgatctctctcg	184	mtr-MIR166b,mtr-MIR166g,mtr-MIR166a,mtr-MIR166c,mtr-MIR166f,mtr-MIR166e,gma-MIR166j,gma-MIR166h,gma-MIR166t,gma-MIR166b,gma-MIR166d,gma-MIR166u,gma-MIR166s,gma-MIR166n,gma-MIR166f,gma-MIR166k,gma-MIR166o,gma-MIR166q,gma-MIR166a,gma-MIR166c,gma-MIR166r,gma-MIR166g,gma-MIR166e,gma-MIR166i,gma-MIR166p,gma-MIR166m,lja-MIR166,pvu-MIR166a,ptc-MIR166h,ptc-MIR166m,ptc-MIR166q,ptc-MIR166n,ptc-MIR166g,ptc-…	mtr-MIR166g	tttgaggGGAATGTTGTCTGGCTCGAGGacgctttcttctcgatctaatgcaaatttgtggtcatggattgtaaagtattcTCGGACCAGGCTTCATTCCCCccaat	mtr-miR166g-5p	GGAATGTTGTCTGGCTCGAGG	5'	Diff	gp2b	...((((((((.(((((((((((((((..(..(((..(((((((((((...)))).((((((.......))))))..)))))))..)))..)..)))))))))))))))))))))))...	114	45	-54.8	1	2747	1721	2804	4318	2406	320.5	289	424.5	6084	1711.5	996.5	1367.5	949.5	3272.5	3861	1751.5	3048.5	2121	575	585	757	3700.5	2451.5	2467	1827	1204
54	48	mtr-miR166b_2ss20TC21AG	TCGGACCAGGCTTCATTCCCG	21	arahy.Tifrunner.gnm1.Arahy.20	+	11507522	11507641	aatgggagattgaggttgatgGGAATGTTGTTTGGCTCGAGGtcacttattgagtagttgtataccctttataatgagatcTCGGACCAGGCTTCATTCCCGtcgacttgatctctctcg	184	mtr-MIR166b,mtr-MIR166g,mtr-MIR166a,mtr-MIR166c,mtr-MIR166f,mtr-MIR166e,gma-MIR166j,gma-MIR166h,gma-MIR166t,gma-MIR166b,gma-MIR166d,gma-MIR166u,gma-MIR166s,gma-MIR166n,gma-MIR166f,gma-MIR166k,gma-MIR166o,gma-MIR166q,gma-MIR166a,gma-MIR166c,gma-MIR166r,gma-MIR166g,gma-MIR166e,gma-MIR166i,gma-MIR166p,gma-MIR166m,lja-MIR166,pvu-MIR166a,ptc-MIR166h,ptc-MIR166m,ptc-MIR166q,ptc-MIR166n,ptc-MIR166g,ptc-…	mtr-MIR166b	gttgatgggaatgttgtttggctcgaggtaataactaactcaatttctttgtctttgaaagcttttctttgtttcactctttttgattcttagaaagttgaaactaagtgagctttaaaggtttgattttgatgtgtgattatcTCGGACCAGGCTTCATTCCTAccaac	mtr-miR166b	TCGGACCAGGCTTCATTCCTA	3'	Diff	gp2b	...((((((((.(((((((((((((((..(..(((..(((((((((((...)))).((((((.......))))))..)))))))..)))..)..)))))))))))))))))))))))...	114	45	-54.8	1	22367	14976	24062	24174	15369.5	2983	2266	3739.5	41632	12218	8498	11753.5	11984	18938	21661	11125.5	19401.5	14178	5177	5147.5	6305	25869.5	15908	28624.5	9962	10980.5
55	50	mtr-MIR166g-p5	TGAGGGGAATGTTGTCTGGCT	21	arahy.Tifrunner.gnm1.Arahy.12	+	5659185	5659224	tttgtctttTGAGGGGAATGTTGTCTGGCTCGAGGaccct	59	mtr-MIR166g,gma-MIR166b,gma-MIR166a,gma-MIR166n,gma-MIR166m,gma-MIR166c,gma-MIR166l,gma-MIR166o,gma-MIR166u,gma-MIR166q,pvu-MIR166a,ptc-MIR166a,ptc-MIR166j,ptc-MIR166k,ptc-MIR166q,ptc-MIR166c,ath-MIR165a,mdm-MIR166a,mdm-MIR166h,mdm-MIR166g,stu-MIR166a,aly-MIR166c,aly-MIR166a,aly-MIR166d,aly-MIR165a,ppe-MIR166d,ppe-MIR166e,mes-MIR166d,mes-MIR166f,mes-MIR166a,mes-MIR166g,vvi-MIR166c,vvi-MIR166e,nta…	mtr-MIR166g	tttgaggGGAATGTTGTCTGGCTCGAGGacgctttcttctcgatctaatgcaaatttgtggtcatggattgtaaagtattcTCGGACCAGGCTTCATTCCCCccaat	mtr-MIR166g-p5	tgaggGGAATGTTGTCTGGCT	5'	New	gp2b	...(((.(((((((((.......)))..)))))))))...	34	50	-8.4	0.4	0	0	0	0	2.5	0	0	0	2.5	0	0	0	0	3	3.5	0	3	0	0	0	0	0	2.5	3	0	0
55	51	mtr-miR166g-5p	GGAATGTTGTCTGGCTCGAGG	21	arahy.Tifrunner.gnm1.Arahy.12	+	5659185	5659224	tttgtctttTGAGGGGAATGTTGTCTGGCTCGAGGaccct	59	mtr-MIR166g,gma-MIR166b,gma-MIR166a,gma-MIR166n,gma-MIR166m,gma-MIR166c,gma-MIR166l,gma-MIR166o,gma-MIR166u,gma-MIR166q,pvu-MIR166a,ptc-MIR166a,ptc-MIR166j,ptc-MIR166k,ptc-MIR166q,ptc-MIR166c,ath-MIR165a,mdm-MIR166a,mdm-MIR166h,mdm-MIR166g,stu-MIR166a,aly-MIR166c,aly-MIR166a,aly-MIR166d,aly-MIR165a,ppe-MIR166d,ppe-MIR166e,mes-MIR166d,mes-MIR166f,mes-MIR166a,mes-MIR166g,vvi-MIR166c,vvi-MIR166e,nta…	mtr-MIR166g	tttgaggGGAATGTTGTCTGGCTCGAGGacgctttcttctcgatctaatgcaaatttgtggtcatggattgtaaagtattcTCGGACCAGGCTTCATTCCCCccaat	mtr-miR166g-5p	GGAATGTTGTCTGGCTCGAGG	3'	Yes	gp2b	...(((.(((((((((.......)))..)))))))))...	34	50	-8.4	0.4	5744.5	2815	5544	9291.5	5513	690.5	510	1443	10066	2696	1778.5	2963	2341	3653.5	7390.5	3228.5	5749	3846	2173	1791	2733.5	3846	5036	5654	3836	2096
56	51	mtr-miR166g-5p	GGAATGTTGTCTGGCTCGAGG	21	arahy.Tifrunner.gnm1.Arahy.02	+	4609083	4609137	tgaggaagctttgtcttttgaggGGAATGTTGTCTGGCTCGAGGaccctttcatc	59	mtr-MIR166g,gma-MIR166b,gma-MIR166a,gma-MIR166n,gma-MIR166m,gma-MIR166c,gma-MIR166l,gma-MIR166o,gma-MIR166u,gma-MIR166q,pvu-MIR166a,ptc-MIR166a,ptc-MIR166j,ptc-MIR166k,ptc-MIR166q,ptc-MIR166c,ath-MIR165a,mdm-MIR166a,mdm-MIR166h,mdm-MIR166g,stu-MIR166a,aly-MIR166c,aly-MIR166a,aly-MIR166d,aly-MIR165a,ppe-MIR166d,ppe-MIR166e,mes-MIR166d,mes-MIR166f,mes-MIR166a,mes-MIR166g,vvi-MIR166c,vvi-MIR166e,nta…	mtr-MIR166g	tttgaggGGAATGTTGTCTGGCTCGAGGacgctttcttctcgatctaatgcaaatttgtggtcatggattgtaaagtattcTCGGACCAGGCTTCATTCCCCccaat	mtr-miR166g-5p	GGAATGTTGTCTGGCTCGAGG	3'	Yes	gp2b	...(((((....(((.(((((((((.......)))..))))))))).)))))...	49	49.1	-11.8	0.4	5744.5	2815	5544	9291.5	5513	690.5	510	1443	10066	2696	1778.5	2963	2341	3653.5	7390.5	3228.5	5749	3846	2173	1791	2733.5	3846	5036	5654	3836	2096
57	52	mtr-MIR166g-p5_2ss9GT20CT	AGGGGAATTTTGTCTGGCTT	20	arahy.Tifrunner.gnm1.Arahy.03	+	47599997	47600072	catgtgAGGGGAATTTTGTCTGGCGTgtgagtacgcacagtaccatgcgtatgcatgatgacctatttttcactaa	38	mtr-MIR166g,gma-MIR166a,gma-MIR166c,ptc-MIR166a,ptc-MIR166j,ptc-MIR166k,ptc-MIR166c,mdm-MIR166a,mdm-MIR166h,mdm-MIR166g,aly-MIR166a,ppe-MIR166d,ppe-MIR166e,mes-MIR166d,mes-MIR166f,mes-MIR166a,mes-MIR166g,vvi-MIR166c,vvi-MIR166e,nta-MIR166d,nta-MIR166a,nta-MIR166b,nta-MIR166e,nta-MIR166f,csi-MIR166a,csi-MIR166e,lus-MIR166h,lus-MIR166i,lus-MIR166g,cme-MIR166b,cme-MIR166c,cme-MIR166f,fve-MIR166e,sly…	mtr-MIR166g	tttgaggGGAATGTTGTCTGGCTCGAGGacgctttcttctcgatctaatgcaaatttgtggtcatggattgtaaagtattcTCGGACCAGGCTTCATTCCCCccaat	mtr-MIR166g-p5	aggGGAATGTTGTCTGGCTC	5'	New	gp2b	...(((((((..((..(((...(((..((.((((.....))))))..)))..)))..))..))).....))))...	70	44.7	-23.9	0.7	0	0	0	0	0	0	0	0	2.5	0	0	0	0	6	0	0	0	0	0	0	0	5	0	0	0	0
58	53	ptc-MIR166n-p5_2ss16AG18GA	AATGAAGTTTGATCCGAAATC	21	arahy.Tifrunner.gnm1.Arahy.06	+	93060848	93060908	aaaggagggtgtctggAATGAAGTTTGATCCGAAATCattgtctctctcatctgatccata	6	gma-MIR166k,ptc-MIR166n,ptc-MIR166o,vvi-MIR166a,lus-MIR166e,lus-MIR166f,	ptc-MIR166n	aaggggtgtttggaatgaagtttgatccaagatccttgtctctcccgttaacttagtctctgttaccgttaggtattcattactgagtgtatttgcagcccccttgtctgattttagcatcatgagagtaggaagtgctggtgatcatagggtttggttcaagatccatttgactcttctctttatatctctcctgtgtcctagctggtaatctgtagtagtcttaattatcccttacttcttgttaatttttaggtttgatcttgcaagtaattatatttggaaaatatcataaaatgatcTCGGACCAGGCTTCATTCCTTacaccttg	ptc-MIR166n-p5	aatgaagtttgatccaagatc	5'	New	gp2b	...((((((((...(((..((....((((.....))))...))..))))))))..)))...	55	41	-10.8	0.4	48	40	70.5	83.5	47	11.5	5	15	76	46	20.5	12	15.5	53	85	29	52	43.5	11	10.5	24.5	50	39.5	38	23	14
59	53	ptc-MIR166n-p5_2ss16AG18GA	AATGAAGTTTGATCCGAAATC	21	arahy.Tifrunner.gnm1.Arahy.16	+	123734174	123734238	tgtctggAATGAAGTTTGATCCGAAATCattgtctctctcatctgaatcatattctttttccttt	6	gma-MIR166k,ptc-MIR166n,ptc-MIR166o,vvi-MIR166a,lus-MIR166f,lus-MIR166e,	ptc-MIR166n	aaggggtgtttggaatgaagtttgatccaagatccttgtctctcccgttaacttagtctctgttaccgttaggtattcattactgagtgtatttgcagcccccttgtctgattttagcatcatgagagtaggaagtgctggtgatcatagggtttggttcaagatccatttgactcttctctttatatctctcctgtgtcctagctggtaatctgtagtagtcttaattatcccttacttcttgttaatttttaggtttgatcttgcaagtaattatatttggaaaatatcataaaatgatcTCGGACCAGGCTTCATTCCTTacaccttg	ptc-MIR166n-p5	aatgaagtttgatccaagatc	5'	New	gp2b	.....((((.((((..(((((.((.................)).).))))....))))))))...	57	33.8	-6	0.3	48	40	70.5	83.5	47	11.5	5	15	76	46	20.5	12	15.5	53	85	29	52	43.5	11	10.5	24.5	50	39.5	38	23	14
60	54	mtr-miR166b_L+2R-2	TCTCGGACCAGGCTTCATTCC	21	arahy.Tifrunner.gnm1.Arahy.06	+	93061160	93061245	atttatatgaatatggatggtgggggattgattatattgaTCTCGGACCAGGCTTCATTCCtcacacctacctttcctatatataa	70	mtr-MIR166b,mtr-MIR166a,mtr-MIR166c,mtr-MIR166f,mtr-MIR166g,gma-MIR166t,gma-MIR166b,gma-MIR166n,gma-MIR166j,gma-MIR166d,gma-MIR166f,gma-MIR166k,gma-MIR166h,gma-MIR166o,gma-MIR166u,gma-MIR166q,gma-MIR166s,pvu-MIR166a,ptc-MIR166m,ptc-MIR166h,ptc-MIR166q,ptc-MIR166n,ptc-MIR166g,ptc-MIR166o,ath-MIR166d,ath-MIR166c,ath-MIR166g,mdm-MIR166c,mdm-MIR166b,gra-MIR166c,stu-MIR166b,aly-MIR166c,aly-MIR166d,aly…	mtr-MIR166b	gttgatgggaatgttgtttggctcgaggtaataactaactcaatttctttgtctttgaaagcttttctttgtttcactctttttgattcttagaaagttgaaactaagtgagctttaaaggtttgattttgatgtgtgattatcTCGGACCAGGCTTCATTCCTAccaac	mtr-miR166b	TCGGACCAGGCTTCATTCCTA	3'	Diff	gp2b	...((((((.....((..(((((((((.(((.....(((.((...)).)))...))).))))).))))..)).....))))))...	80	37.2	-20.6	0.6	149882	87576.5	121350	134707	90376	16909	13401.5	25443.5	183026	61344.5	58973.5	62279	60144	92680	112302	74028.5	134802	71454	47361.5	38240.5	48875	149851	129558	144762	66100	66479
61	55	mtr-MIR166g-p5_1ss20CT	AGGGGAATGTTGTCTGGCTT	20	arahy.Tifrunner.gnm1.Arahy.09	-	59005788	59005882	AGGGGAATGTTGACTGGCTTctccgtgagtatgcaccaaataagtagggtgagatccaccatgttggatgacttatgggtgctgggcagcatgta	38	mtr-MIR166g,gma-MIR166a,gma-MIR166c,ptc-MIR166a,ptc-MIR166j,ptc-MIR166k,ptc-MIR166c,mdm-MIR166h,mdm-MIR166a,mdm-MIR166g,aly-MIR166a,ppe-MIR166e,ppe-MIR166d,mes-MIR166d,mes-MIR166f,mes-MIR166a,mes-MIR166g,vvi-MIR166c,vvi-MIR166e,nta-MIR166d,nta-MIR166b,nta-MIR166f,nta-MIR166a,nta-MIR166e,csi-MIR166a,csi-MIR166e,lus-MIR166h,lus-MIR166g,lus-MIR166i,cme-MIR166c,cme-MIR166f,cme-MIR166b,fve-MIR166e,sly…	mtr-MIR166g	tttgaggGGAATGTTGTCTGGCTCGAGGacgctttcttctcgatctaatgcaaatttgtggtcatggattgtaaagtattcTCGGACCAGGCTTCATTCCCCccaat	mtr-MIR166g-p5	aggGGAATGTTGTCTGGCTC	5'	New	gp2b	......((((((.(..((..(.((((((((...((((..........))))..(((((......))))).))))))))).))..).))))))...	86	49.5	-31	0.7	6.5	0	0	0	0	0	0	0	11.5	2.5	3.5	4.5	0	9.5	13	7.5	4.5	4.5	0	0	5	3.5	8.5	6.5	0	0
62	56	gma-miR166p_L+2R-1	CCTCGGACCAGGCTTCATTCC	21	arahy.Tifrunner.gnm1.Arahy.10	+	72109354	72109397	CCTCGGACCAGGCTTCATTCCcctcaatcacagcttctttcaat	16	gma-MIR166r,ptc-MIR166i,ptc-MIR166l,mdm-MIR166j,mdm-MIR166d,ppe-MIR166c,mes-MIR166j,mes-MIR166c,vvi-MIR166d,lus-MIR166a,lus-MIR166c,lus-MIR166d,rco-MIR166a,aqc-MIR166a,eun-MIR166,hbr-MIR166a,	gma-MIR166r	cacgtcttgaggggaatgcagtgtggtccaaggagatgatatatcacttcaccatactcatatcttcacaaactcatcagattcagatgtaataataatttgtaatatatgcatattatgtctccTCGGACCAGGCTTCATTCCCttcaattaca	gma-miR166p	TCGGACCAGGCTTCATTCCC	5'	Diff	gp2b	....(((..(((((.................)))))..)))...	37	50	-3.2	0.1	40.5	17.5	28	33	27	3.5	0	7.5	51.5	17	18.5	15	17	36	36.5	19.5	28.5	18.5	15	15.5	18.5	35	35	39.5	18.5	18
63	57	mtr-miR166a_1ss21CT	TCGGACCAGGCTTCATTCCCT	21	arahy.Tifrunner.gnm1.Arahy.15	-	139215948	139216075	aatgaatgtgagggattgagggtgtggggaatgccgcctggctcgagatgtctaagtcatgtgatgagtttttgtgacaatttcTCGGACCAGGCTTCATTCCCTtcactccgtcttctctcgtctct	179	mtr-MIR166e,mtr-MIR166g,mtr-MIR166b,mtr-MIR166a,mtr-MIR166c,mtr-MIR166f,gma-MIR166r,gma-MIR166t,gma-MIR166b,gma-MIR166a,gma-MIR166d,gma-MIR166c,gma-MIR166g,gma-MIR166e,gma-MIR166i,gma-MIR166p,gma-MIR166u,gma-MIR166s,gma-MIR166n,gma-MIR166j,gma-MIR166m,gma-MIR166f,gma-MIR166k,gma-MIR166h,gma-MIR166o,gma-MIR166q,lja-MIR166,pvu-MIR166a,ptc-MIR166q,ptc-MIR166n,ptc-MIR166o,ptc-MIR166d,ptc-MIR166a,ptc-…	mtr-MIR166a	cagacatacgaaggagttcaggggaatggtgtctgattcgagaccattcgtcacaagtaaacagtagccttgagaatgatcTCGGACCAGGCTTCATTCCCCctagctcatagtatcatgc	mtr-miR166a	TCGGACCAGGCTTCATTCCCC	3'	Diff	gp2b	.........((((((....(((((..(((((((..((((((..(((((.......(((((..((.....))..)))))....)))))..))))))..)))))))..))).))....))))))......	113	49.2	-54.6	0.9	1120.5	654	702	768.5	482	107.5	105.5	140.5	1111.5	478	308.5	282.5	343	812.5	624.5	542	883.5	592	412.5	398.5	543	1559	1202	915	503	629.5
64	58	mtr-miR166a_L+2R-2_1	TCTCGGACCAGGCTTCATTCC	21	arahy.Tifrunner.gnm1.Arahy.16	+	123734460	123734560	gcatgagatttatatgaatatggatggtgggggattgattatattgaTCTCGGACCAGGCTTCATTCCtcacacctacctttcctatatataatgttacaa	70	mtr-MIR166g,mtr-MIR166b,mtr-MIR166a,mtr-MIR166c,mtr-MIR166f,gma-MIR166t,gma-MIR166b,gma-MIR166d,gma-MIR166u,gma-MIR166s,gma-MIR166n,gma-MIR166j,gma-MIR166f,gma-MIR166k,gma-MIR166h,gma-MIR166o,gma-MIR166q,pvu-MIR166a,ptc-MIR166h,ptc-MIR166m,ptc-MIR166q,ptc-MIR166n,ptc-MIR166g,ptc-MIR166o,ath-MIR166c,ath-MIR166d,ath-MIR166g,mdm-MIR166c,mdm-MIR166b,gra-MIR166c,stu-MIR166b,aly-MIR166d,aly-MIR166g,aly…	mtr-MIR166a	cagacatacgaaggagttcaggggaatggtgtctgattcgagaccattcgtcacaagtaaacagtagccttgagaatgatcTCGGACCAGGCTTCATTCCCCctagctcatagtatcatgc	mtr-miR166a	TCGGACCAGGCTTCATTCCCC	3'	Diff	gp2b	...(((.(((((((((.....((..(((((((((.(((.....(((.((...)).)))...))).))))).))))..)).....)))))).))).)))...	95	37.6	-22.2	0.6	149882	87576.5	121350	134707	90376	16909	13401.5	25443.5	183026	61344.5	58973.5	62279	60144	92680	112302	74028.5	134802	71454	47361.5	38240.5	48875	149851	129558	144762	66100	66479
65	59	cme-MIR166i-p3_2ss9GT18CT	TCGGACCATGCTTCATTTT	19	arahy.Tifrunner.gnm1.Arahy.19	+	142405661	142405680	cTCGGAGCATGCTTCATTTT	1	cme-MIR166i,	cme-MIR166i	tgaggagaatggaaactggttcgagaacgtttgtatggatgaacataaaaagagagtctttcatccgaacgatcTCGGACCAGGCTTCATTCTCgccagct	cme-MIR166i-p3	TCGGACCAGGCTTCATTCT	3'	New	gp2b	...((((....)))).....	12	45	-3.4	0.4	0	13	0	0	0	0	0	0	14	11	0	0	0	19	0	0	0	0	0	0	0	26	0	7	0	0
66	60	mtr-miR166a_R+1	TCGGACCAGGCTTCATTCCCCA	22	arahy.Tifrunner.gnm1.Arahy.20	-	89489263	89489306	ccTCGGACCAGGCTTCATTCCCCTcaatcacagcttcttccaat	108	mtr-MIR166e,mtr-MIR166g,mtr-MIR166b,mtr-MIR166a,mtr-MIR166c,mtr-MIR166f,gma-MIR166r,gma-MIR166g,gma-MIR166e,gma-MIR166i,gma-MIR166p,gma-MIR166u,gma-MIR166t,gma-MIR166b,gma-MIR166d,gma-MIR166s,gma-MIR166n,gma-MIR166j,gma-MIR166f,gma-MIR166k,gma-MIR166h,gma-MIR166o,gma-MIR166q,pvu-MIR166a,ptc-MIR166d,ptc-MIR166i,ptc-MIR166f,ptc-MIR166l,ptc-MIR166h,ptc-MIR166m,ptc-MIR166q,ptc-MIR166n,ptc-MIR166g,ptc…	mtr-MIR166a	cagacatacgaaggagttcaggggaatggtgtctgattcgagaccattcgtcacaagtaaacagtagccttgagaatgatcTCGGACCAGGCTTCATTCCCCctagctcatagtatcatgc	mtr-miR166a	TCGGACCAGGCTTCATTCCCC	5'	Diff	gp2b	....(((..(((((.................)))))..)))...	37	52.3	-6.1	0.3	141.5	39	75	75	58	9	2.5	22	197.5	42	48.5	38	45	65	79	86	83.5	98.5	71	93	98.5	86.5	162	139.5	86.5	102
67	61	mtr-miR167b-5p_R+2_1ss21GA	TGAAGCTGCCAGCATGATCTAAT	23	arahy.Tifrunner.gnm1.Arahy.06	+	16748687	16748825	tcaatatataattcatcgtgcaccaataacagtTGAAGCTGCCAGCATGATCTAAAtttttcttgtattaagtcaaggaaagatcgGATCATGTGACAGCTTCACCtgtatatgggatcacgaaagaaatgtatgtgta	20	mtr-MIR167b,ptc-MIR167b,ptc-MIR167d,ath-MIR167a,ath-MIR167b,aly-MIR167a,aly-MIR167b,vvi-MIR167b,csi-MIR167e,lus-MIR167d,bra-MIR167d,bna-MIR167b,bra-MIR167b,bra-MIR167c,bna-MIR167a,cas-MIR167a,cas-MIR167b,ghr-MIR167a,eun-MIR167c,dpr-MIR167b,	mtr-MIR167b	caatgacagtTGAAGCTGCCAGCATGATCTGtgctttccttcctgtgtatatactttaatttccagctgaatttaaatataaccaaaaaaataaatatgtttggtctaaattttgatcaaacttatatatatttttgcttatgtttaagtctggggtgagtttatttgtggtaagaacaGATCATGTTGGAGCTTCACCtgttaaat	mtr-miR167b-5p	TGAAGCTGCCAGCATGATCTG	5'	Diff	gp2b	...(((((((.(((.(((((..(((...((((.((((((((...(((((((((...(((((((((........)))))))))...)))))))))..)))))))).))))...)))...)))))..))).)))))))...	133	36	-53.2	1.1	3.5	3	7.5	0	2.5	0	0	2.5	9	0	0	0	3	0	0	0	0	0	0	0	0	2.5	0	3	0	0
67	62	eun-miR167c-3p_L-4_1ss14GA	GATCATGTGACAGCTTCACC	20	arahy.Tifrunner.gnm1.Arahy.06	+	16748687	16748825	tcaatatataattcatcgtgcaccaataacagtTGAAGCTGCCAGCATGATCTAAAtttttcttgtattaagtcaaggaaagatcgGATCATGTGACAGCTTCACCtgtatatgggatcacgaaagaaatgtatgtgta	20	mtr-MIR167b,ptc-MIR167b,ptc-MIR167d,ath-MIR167a,ath-MIR167b,aly-MIR167a,aly-MIR167b,vvi-MIR167b,csi-MIR167e,lus-MIR167d,bra-MIR167d,bna-MIR167b,bra-MIR167b,bra-MIR167c,bna-MIR167a,cas-MIR167a,cas-MIR167b,ghr-MIR167a,eun-MIR167c,dpr-MIR167b,	eun-MIR167c	atcagtTGAAGCTGCCAGCGTGATCTCAacttccctggtctcatgaaggaaagATCAGATCATGTGGCAGCTTCACCtgtt	eun-miR167c-3p	ATCAGATCATGTGGCAGCTTCACC	3'	Diff	gp2b	...(((((((.(((.(((((..(((...((((.((((((((...(((((((((...(((((((((........)))))))))...)))))))))..)))))))).))))...)))...)))))..))).)))))))...	133	36	-53.2	1.1	51	19	43	78.5	32	9	4.5	7	63.5	18	10	19	22	27.5	26.5	23	41.5	34.5	16	7	16	16	46	72	21	26.5
68	61	mtr-miR167b-5p_R+2_1ss21GA	TGAAGCTGCCAGCATGATCTAAT	23	arahy.Tifrunner.gnm1.Arahy.06	+	16775125	16775283	ttatatcgtatgtcactatataattcatcgtgcaccaataacagtTGAAGCTGCCAGCATGATCTAAAttttccttgtgttaagtcaaggaaagatcgGATCATGTGACAGCTTCACCtgtatatgggatcacgaaagaaatgtatgtgtatgatgatt	20	mtr-MIR167b,ptc-MIR167b,ptc-MIR167d,ath-MIR167a,ath-MIR167b,aly-MIR167a,aly-MIR167b,vvi-MIR167b,csi-MIR167e,lus-MIR167d,bra-MIR167d,bna-MIR167b,bra-MIR167b,bra-MIR167c,bna-MIR167a,cas-MIR167a,cas-MIR167b,ghr-MIR167a,eun-MIR167c,dpr-MIR167b,	mtr-MIR167b	caatgacagtTGAAGCTGCCAGCATGATCTGtgctttccttcctgtgtatatactttaatttccagctgaatttaaatataaccaaaaaaataaatatgtttggtctaaattttgatcaaacttatatatatttttgcttatgtttaagtctggggtgagtttatttgtggtaagaacaGATCATGTTGGAGCTTCACCtgttaaat	mtr-miR167b-5p	TGAAGCTGCCAGCATGATCTG	5'	Diff	gp2b	...(((((((...(((.(((((.(((.(((((..(((...((((.((((((((...(((((((((...(((((((((........)))))))))...)))))))))..)))))))).))))...)))...)))))..))).)))))))))))))))...	153	36.5	-60.9	1	3.5	3	7.5	0	2.5	0	0	2.5	9	0	0	0	3	0	0	0	0	0	0	0	0	2.5	0	3	0	0
68	62	eun-miR167c-3p_L-4_1ss14GA	GATCATGTGACAGCTTCACC	20	arahy.Tifrunner.gnm1.Arahy.06	+	16775125	16775283	ttatatcgtatgtcactatataattcatcgtgcaccaataacagtTGAAGCTGCCAGCATGATCTAAAttttccttgtgttaagtcaaggaaagatcgGATCATGTGACAGCTTCACCtgtatatgggatcacgaaagaaatgtatgtgtatgatgatt	20	mtr-MIR167b,ptc-MIR167b,ptc-MIR167d,ath-MIR167a,ath-MIR167b,aly-MIR167a,aly-MIR167b,vvi-MIR167b,csi-MIR167e,lus-MIR167d,bra-MIR167d,bna-MIR167b,bra-MIR167b,bra-MIR167c,bna-MIR167a,cas-MIR167a,cas-MIR167b,ghr-MIR167a,eun-MIR167c,dpr-MIR167b,	eun-MIR167c	atcagtTGAAGCTGCCAGCGTGATCTCAacttccctggtctcatgaaggaaagATCAGATCATGTGGCAGCTTCACCtgtt	eun-miR167c-3p	ATCAGATCATGTGGCAGCTTCACC	3'	Diff	gp2b	...(((((((...(((.(((((.(((.(((((..(((...((((.((((((((...(((((((((...(((((((((........)))))))))...)))))))))..)))))))).))))...)))...)))))..))).)))))))))))))))...	153	36.5	-60.9	1	51	19	43	78.5	32	9	4.5	7	63.5	18	10	19	22	27.5	26.5	23	41.5	34.5	16	7	16	16	46	72	21	26.5
69	63	mtr-miR167b-5p_R+1	TGAAGCTGCCAGCATGATCTGG	22	arahy.Tifrunner.gnm1.Arahy.04	+	37618932	37619001	tcaagcttccgttcttctcatcttctatctatgttggtttgagaggtTGAAGCTGCCAGCATGATCTGGt	38	mtr-MIR167b,gma-MIR167c,gma-MIR167g,gma-MIR167j,gma-MIR167a,lja-MIR167,gso-MIR167a,ptc-MIR167e,ath-MIR167d,gra-MIR167a,gra-MIR167b,aly-MIR167d,ppe-MIR167c,mes-MIR167a,mes-MIR167d,mes-MIR167f,mes-MIR167e,vvi-MIR167a,nta-MIR167a,nta-MIR167c,nta-MIR167b,csi-MIR167c,csi-MIR167a,lus-MIR167g,lus-MIR167i,lus-MIR167f,lus-MIR167c,cme-MIR167f,cme-MIR167d,cme-MIR167a,bna-MIR167d,cpa-MIR167d,rco-MIR167c,cca-…	mtr-MIR167b	caatgacagtTGAAGCTGCCAGCATGATCTGtgctttccttcctgtgtatatactttaatttccagctgaatttaaatataaccaaaaaaataaatatgtttggtctaaattttgatcaaacttatatatatttttgcttatgtttaagtctggggtgagtttatttgtggtaagaacaGATCATGTTGGAGCTTCACCtgttaaat	mtr-miR167b-5p	TGAAGCTGCCAGCATGATCTG	3'	Diff	gp2b	...((((((....(((((((....(((.......)))..)))))))..))))))(((((......)))))	51	44.3	-20.7	0.7	209	150.5	221	218.5	152	27	22	50.5	268.5	175	124	91.5	91	173.5	249	96	218	125	33	39.5	37.5	213	192.5	138	107	93
70	63	mtr-miR167b-5p_R+1	TGAAGCTGCCAGCATGATCTGG	22	arahy.Tifrunner.gnm1.Arahy.14	+	36058694	36058754	tTGAAGCTGCCAGCATGATCTGGtaatttaccaaactcgctctagatcgccttatcattaa	38	mtr-MIR167b,gma-MIR167c,gma-MIR167g,gma-MIR167j,gma-MIR167a,lja-MIR167,gso-MIR167a,ptc-MIR167e,ath-MIR167d,gra-MIR167a,gra-MIR167b,aly-MIR167d,ppe-MIR167c,mes-MIR167a,mes-MIR167f,mes-MIR167d,mes-MIR167e,vvi-MIR167a,nta-MIR167a,nta-MIR167c,nta-MIR167b,csi-MIR167c,csi-MIR167a,lus-MIR167g,lus-MIR167i,lus-MIR167f,lus-MIR167c,cme-MIR167f,cme-MIR167d,cme-MIR167a,bna-MIR167d,cpa-MIR167d,rco-MIR167c,cca-…	mtr-MIR167b	caatgacagtTGAAGCTGCCAGCATGATCTGtgctttccttcctgtgtatatactttaatttccagctgaatttaaatataaccaaaaaaataaatatgtttggtctaaattttgatcaaacttatatatatttttgcttatgtttaagtctggggtgagtttatttgtggtaagaacaGATCATGTTGGAGCTTCACCtgttaaat	mtr-miR167b-5p	TGAAGCTGCCAGCATGATCTG	5'	Diff	gp2b	.(((.((.....))..(((((((..................)))))))......)))....	32	41	-8.9	0.4	209	150.5	221	218.5	152	27	22	50.5	268.5	175	124	91.5	91	173.5	249	96	218	125	33	39.5	37.5	213	192.5	138	107	93
71	64	csi-miR167c-3p_1ss10TA	AGGTCATCTAGCAGCTTCAAT	21	arahy.Tifrunner.gnm1.Arahy.04	+	37619319	37619372	attttgagtttttagattatggttccatatcAGGTCATCTAGCAGCTTCAATca	5	nta-MIR167a,nta-MIR167c,nta-MIR167b,csi-MIR167c,sly-MIR167b,	csi-MIR167c	tttgagagatTGAAGCTGCCAGCATGATCTGgtaatcaacctttttgtatatatatatatatattaattccttatagtttttagatttaatttcttttaattagatccatggtttcaattctattgaataaatggtggggttttatattttcgtgcaattattaagaggatagatggaatagcgcctttaaatccaatcacttttttagttttattttgatcttttttgccccctaaaattaagggtaaaggttaatatgtgagagagttttagggtgtgatttattagcttcgtagatgaatggttccatcAGGTCATCTTGCAGCTTCAATtactcatt	csi-miR167c-3p	AGGTCATCTTGCAGCTTCAAT	3'	Diff	gp2b	...(((((((..(((((..((((.....))))....)))))..)))).)))...	48	33.3	-8.6	0.5	323	332	312.5	636	277.5	37.5	28	56.5	791.5	293.5	184.5	189.5	119	309	583	188	357.5	196	75	62	69.5	373	349	394.5	176	133.5
72	64	csi-miR167c-3p_1ss10TA	AGGTCATCTAGCAGCTTCAAT	21	arahy.Tifrunner.gnm1.Arahy.14	+	36059029	36059096	agagggtaattttgagtttttagattatggttccatatcAGGTCATCTAGCAGCTTCAATcactcaat	5	nta-MIR167a,nta-MIR167c,nta-MIR167b,csi-MIR167c,sly-MIR167b,	csi-MIR167c	tttgagagatTGAAGCTGCCAGCATGATCTGgtaatcaacctttttgtatatatatatatatattaattccttatagtttttagatttaatttcttttaattagatccatggtttcaattctattgaataaatggtggggttttatattttcgtgcaattattaagaggatagatggaatagcgcctttaaatccaatcacttttttagttttattttgatcttttttgccccctaaaattaagggtaaaggttaatatgtgagagagttttagggtgtgatttattagcttcgtagatgaatggttccatcAGGTCATCTTGCAGCTTCAATtactcatt	csi-miR167c-3p	AGGTCATCTTGCAGCTTCAAT	3'	Diff	gp2b	...((((.(((..(((((..(((((..((((.....))))....)))))..))))).))).))))...	62	35.3	-12.1	0.5	323	332	312.5	636	277.5	37.5	28	56.5	791.5	293.5	184.5	189.5	119	309	583	188	357.5	196	75	62	69.5	373	349	394.5	176	133.5
73	65	mtr-miR169b_1ss9GA	CAGCCAAGAATGACTTGCCGG	21	arahy.Tifrunner.gnm1.Arahy.04	+	29879324	29879485	ttttagagcactcgcaaaaaagatagagagttgattgCAGCCAAGAATGACTTGCCGGaataatatataaaataagtagttatagtacttgtttaaattataattttGGCAAGCTGTTCTTGGCTACAtttgtctctcttctcttaatgcaaggctctataa	18	mtr-MIR169b,gma-MIR169k,gma-MIR169j,gma-MIR169l,gma-MIR169u,ptc-MIR169f,ath-MIR169c,aly-MIR169c,mes-MIR169k,mes-MIR169l,mes-MIR169m,mes-MIR169a,nta-MIR169a,nta-MIR169k,nta-MIR169c,nta-MIR169i,cpa-MIR169,rco-MIR169a,	mtr-MIR169b	gagtgCAGCCAAGGATGACTTGCCGGtaatatatctaattccttggtttcttccggcaagttgttcttgactacatt	mtr-miR169b	CAGCCAAGGATGACTTGCCGG	5'	Diff	gp2b	...((((((.((.(((...((((.((((((..((.((.((((((((((..((((((..(((.(((....(((((((((.......)))))))))....))).)))..))))))..)))))))))).)).))..))))))..))))..))).))))))))...	156	32.7	-63.7	1.2	285	190	250.5	340	210.5	35.5	41.5	86	508	214.5	87.5	108	95	187.5	212	102	175	138	65.5	49.5	61.5	207	217	189.5	109.5	77
73	66	mes-MIR169a-p3	GGCAAGCTGTTCTTGGCTACA	21	arahy.Tifrunner.gnm1.Arahy.04	+	29879324	29879485	ttttagagcactcgcaaaaaagatagagagttgattgCAGCCAAGAATGACTTGCCGGaataatatataaaataagtagttatagtacttgtttaaattataattttGGCAAGCTGTTCTTGGCTACAtttgtctctcttctcttaatgcaaggctctataa	18	mtr-MIR169b,gma-MIR169k,gma-MIR169j,gma-MIR169l,gma-MIR169u,ptc-MIR169f,ath-MIR169c,aly-MIR169c,mes-MIR169k,mes-MIR169l,mes-MIR169m,mes-MIR169a,nta-MIR169a,nta-MIR169k,nta-MIR169c,nta-MIR169i,cpa-MIR169,rco-MIR169a,	mes-MIR169a	atgCAGCCAAGGATGACTTGCCGGcgtttgcttagtgacctatctagatttggcatatacctcaagccggcaagctgttcttggctacat	mes-MIR169a-p3	ggcaagctgttcttggctaca	3'	New	gp2b	...((((((.((.(((...((((.((((((..((.((.((((((((((..((((((..(((.(((....(((((((((.......)))))))))....))).)))..))))))..)))))))))).)).))..))))))..))))..))).))))))))...	156	32.7	-63.7	1.2	10	0	0	0	0	0	0	0	23	0	0	7	5	6	0	6	0	0	0	0	0	7	0	8	8	0
74	65	mtr-miR169b_1ss9GA	CAGCCAAGAATGACTTGCCGG	21	arahy.Tifrunner.gnm1.Arahy.14	-	28268136	28268308	tttggttttagagcactcgcaaaaaggatagagagttgattgCAGCCAAGAATGACTTGCCGGaataatatatgaaataagtagttatagtacttgtttaaattataattttggcaagttgttcttgactacatttgcctctcttctcttaatgcaaggctctataaatctca	16	mtr-MIR169b,gma-MIR169k,gma-MIR169j,gma-MIR169l,gma-MIR169u,ptc-MIR169f,ath-MIR169c,aly-MIR169c,mes-MIR169m,mes-MIR169k,mes-MIR169l,nta-MIR169a,nta-MIR169k,nta-MIR169c,nta-MIR169i,cpa-MIR169,	mtr-MIR169b	gagtgCAGCCAAGGATGACTTGCCGGtaatatatctaattccttggtttcttccggcaagttgttcttgactacatt	mtr-miR169b	CAGCCAAGGATGACTTGCCGG	5'	Diff	gp2b	...(((((((((((.((.(((..((((..((((((..((.((.((.((((((..(((((((..(((.(((....(((((((((.......)))))))))....))).)))..)))))))..)))))).)).)).))..))))))..))))..))).)))))))).)))))...	167	33.5	-66.4	1.1	285	190	250.5	340	210.5	35.5	41.5	86	508	214.5	87.5	108	95	187.5	212	102	175	138	65.5	49.5	61.5	207	217	189.5	109.5	77
75	67	ppe-MIR169k-p3_2ss12AC20CA	TGTTCTTGGCTCTGTTGGGAT	21	arahy.Tifrunner.gnm1.Arahy.01	-	104694971	104695040	gttctgtaacattctgtaattgcctctgaTGTTCTTGGCTCTGTTGGGATtgctggaatcgttacagttg	2	ppe-MIR169k,ppe-MIR169l,	ppe-MIR169k	caaagcattgcatggaaaagaatagagtctaactGAGCCAAGGATGAATTGCCGGcattgtatattacccctcaaaatgcaatctatatttgtcgaccggcaatttgttcttggctatgttgggctctcttcgttccatgcaatgccatg	ppe-MIR169k-p3	tgttcttggctatgttgggct	3'	New	gp2b	...((((((((((((((((((.((...((.((.....))))....)))))))).))))).)))))))...	64	42.9	-18.6	0.6	33	11.5	43.5	44	36.5	3	0	10	66.5	20	10.5	23.5	22	21	45.5	25.5	47	20.5	14.5	14.5	13	28.5	29.5	41	29	23
76	68	ppe-MIR169l-p3_2ss12AC20CA	TGTTCTTGGCTCTGTTGGGAT	21	arahy.Tifrunner.gnm1.Arahy.16	-	25955149	25955256	agtcaatcgtgcctggcaaccataatcaccaccatttctgaactcttattgttctgtaacaccctgtaatggtccttgaTGTTCTTGGCTCTGTTGGGTTtgttggaa	2	ppe-MIR169l,ppe-MIR169k,	ppe-MIR169l	tttttctaaagcattgcatggaaaagaatagagtctaactGAGCCAAGGATGAATTGCCGGcatcgtatattacgcctcaaaatgcaatctatatttgttgaccggcaatttgttcttggctatgttgggctctcttcgttccatgcaatgccatgaaaga	ppe-MIR169l-p3	tgttcttggctatgttgggct	3'	New	gp2b	..(((((...(((..(((.(((..((((..((((((...((((.......)))).............))))))...)))).....)))...)))..)))..)))))..	104	43.5	-23.6	0.5	33	11.5	43.5	44	36.5	3	0	10	66.5	20	10.5	23.5	22	21	45.5	25.5	47	20.5	14.5	14.5	13	28.5	29.5	41	29	23
77	69	gma-miR172g_R+1_1ss9AT	GCAGCACCTTCAAGATTCACA	21	arahy.Tifrunner.gnm1.Arahy.09	-	119592365	119592492	cacagtcgttgattgcaggtGCAGCACCTTCAAGATTCACAtatatacaaatctaactagctccatggagatggtagagattagttatgAGAATCTTGATGATGCTGCATcagcaataaatgattaat	11	gma-MIR172g,lja-MIR172c,stu-MIR172b,aly-MIR172b,nta-MIR172a,csi-MIR172a,cme-MIR172d,sly-MIR172c,bra-MIR172a,bol-MIR172a,bna-MIR172a,	gma-MIR172g	gcaggtGCAGCACCATCAAGATTCACatgcaatttacaccctataagagatttttgacaaaatttctttcctaggagagttttgacttgAGAATCTTGATGATGCTGCATcagc	gma-miR172g	GCAGCACCATCAAGATTCAC	5'	Diff	gp2b	...(((((((.(((((.(((((((((...(((((((((.((((...((.(((((.((((.(((....))).))))..))))).)))))).)))))))))...))))))))).))))).)))))))...	122	37.5	-53.2	1.1	15.5	25	50	31.5	59	7	4	38.5	53.5	33.5	22	34	39.5	23	20.5	16.5	13.5	58	45	25.5	57	23.5	40	107.5	32.5	42
77	70	gma-miR172a_1ss21TA	AGAATCTTGATGATGCTGCAA	21	arahy.Tifrunner.gnm1.Arahy.09	-	119592365	119592492	cacagtcgttgattgcaggtGCAGCACCTTCAAGATTCACAtatatacaaatctaactagctccatggagatggtagagattagttatgAGAATCTTGATGATGCTGCATcagcaataaatgattaat	11	gma-MIR172g,lja-MIR172c,stu-MIR172b,aly-MIR172b,nta-MIR172a,csi-MIR172a,cme-MIR172d,sly-MIR172c,bra-MIR172a,bol-MIR172a,bna-MIR172a,	gma-MIR172g	gcaggtGCAGCACCATCAAGATTCACatgcaatttacaccctataagagatttttgacaaaatttctttcctaggagagttttgacttgAGAATCTTGATGATGCTGCATcagc	gma-miR172a	AGAATCTTGATGATGCTGCAT	3'	Diff	gp2b	...(((((((.(((((.(((((((((...(((((((((.((((...((.(((((.((((.(((....))).))))..))))).)))))).)))))))))...))))))))).))))).)))))))...	122	37.5	-53.2	1.1	4	0	2.5	0	0	0	0	0	2.5	0	0	0	4	2.5	0	2.5	3	6	0	0	0	0	0	6	3	3.5
78	71	gma-miR172h-5p_2ss7GC9AT	GCAGCACCTTCAAGATTCACA	21	arahy.Tifrunner.gnm1.Arahy.19	+	143940156	143940283	cacagtcgttgattgcaggtGCAGCACCTTCAAGATTCACAtatatacaaatctaactagttccatggagatggtagagattagttatgAGAATCTTGATGATGCTGCATcagcaataaatgattaat	93	mtr-MIR172c,mtr-MIR172b,gma-MIR172b,gma-MIR172f,gma-MIR172a,gma-MIR172h,gma-MIR172g,gma-MIR172j,gma-MIR172i,gma-MIR172k,gma-MIR172l,lja-MIR172b,lja-MIR172c,vun-MIR172,aau-MIR172,ptc-MIR172b,ptc-MIR172f,ptc-MIR172a,ptc-MIR172c,ptc-MIR172e,ptc-MIR172d,ath-MIR172a,ath-MIR172b,ath-MIR172e,mdm-MIR172e,mdm-MIR172d,mdm-MIR172f,mdm-MIR172p,mdm-MIR172g,mdm-MIR172h,mdm-MIR172i,mdm-MIR172j,mdm-MIR172k,gra-M…	gma-MIR172i	gcaggtGCAGCAGCATCAAGATTCACAccgcctaatttgctaggacttcaggactgcacacgcttaattatacatacatatatacatatatgttagctctttgtggagtgcggaataaagttctattttagatgtgGGAATCTTGATGATGCTGCATcagc	gma-miR172h-5p	GCAGCAGCATCAAGATTCACA	5'	Diff	gp2b	...(((((((.(((((.(((((((((...(((((((((.((((...((.(((((.((((..((....))..))))..))))).)))))).)))))))))...))))))))).))))).)))))))...	122	36.7	-50.3	1.1	15.5	25	50	31.5	59	7	4	38.5	53.5	33.5	22	34	39.5	23	20.5	16.5	13.5	58	45	25.5	57	23.5	40	107.5	32.5	42
78	72	mtr-miR172b	AGAATCTTGATGATGCTGCAT	21	arahy.Tifrunner.gnm1.Arahy.19	+	143940156	143940283	cacagtcgttgattgcaggtGCAGCACCTTCAAGATTCACAtatatacaaatctaactagttccatggagatggtagagattagttatgAGAATCTTGATGATGCTGCATcagcaataaatgattaat	93	mtr-MIR172c,mtr-MIR172b,gma-MIR172b,gma-MIR172f,gma-MIR172a,gma-MIR172h,gma-MIR172g,gma-MIR172j,gma-MIR172i,gma-MIR172k,gma-MIR172l,lja-MIR172b,lja-MIR172c,vun-MIR172,aau-MIR172,ptc-MIR172b,ptc-MIR172f,ptc-MIR172a,ptc-MIR172c,ptc-MIR172e,ptc-MIR172d,ath-MIR172a,ath-MIR172b,ath-MIR172e,mdm-MIR172e,mdm-MIR172d,mdm-MIR172f,mdm-MIR172p,mdm-MIR172g,mdm-MIR172h,mdm-MIR172i,mdm-MIR172j,mdm-MIR172k,gra-M…	mtr-MIR172b	tgtttgcagatgtagcatcatcaagattcatatgtgaatgatgcagagtggaactgctaatatttcaattgatcttttgaaataAGAATCTTGATGATGCTGCATcagccatat	mtr-miR172b	AGAATCTTGATGATGCTGCAT	3'	Yes	gp2b	...(((((((.(((((.(((((((((...(((((((((.((((...((.(((((.((((..((....))..))))..))))).)))))).)))))))))...))))))))).))))).)))))))...	122	36.7	-50.3	1.1	894	540.5	1088.5	1168	801	143.5	113.5	309	1831.5	559.5	480	563.5	555.5	541	1363	627	641	914	277.5	297.5	445.5	669.5	842.5	1359.5	614	511
79	72	mtr-miR172b	AGAATCTTGATGATGCTGCAT	21	arahy.Tifrunner.gnm1.Arahy.03	+	1288320	1288365	atggatgtaccaataatagtgAGAATCTTGATGATGCTGCATcggc	91	mtr-MIR172b,mtr-MIR172c,gma-MIR172b,gma-MIR172h,gma-MIR172g,gma-MIR172f,gma-MIR172j,gma-MIR172a,gma-MIR172l,gma-MIR172i,gma-MIR172k,lja-MIR172c,lja-MIR172b,vun-MIR172,aau-MIR172,ptc-MIR172b,ptc-MIR172f,ptc-MIR172a,ptc-MIR172c,ptc-MIR172d,ptc-MIR172e,ath-MIR172a,ath-MIR172b,ath-MIR172e,mdm-MIR172e,mdm-MIR172d,mdm-MIR172f,mdm-MIR172p,mdm-MIR172g,mdm-MIR172h,mdm-MIR172i,mdm-MIR172j,mdm-MIR172k,gra-M…	mtr-MIR172c	tatttgcagatGTAGCATCATCAAGATTCACAtatgaaagtgcaaatggttttgttggattttgatctgatcgatgcaaatctaagttctccataggtcttttgaactgAGAATCTTGATGATGCTGCATcagccataa	mtr-miR172b	AGAATCTTGATGATGCTGCAT	3'	Yes	gp2b	...((((((.((...((...(.....)...))..)).))))))...	40	41.3	-5.9	0.3	894	540.5	1088.5	1168	801	143.5	113.5	309	1831.5	559.5	480	563.5	555.5	541	1363	627	641	914	277.5	297.5	445.5	669.5	842.5	1359.5	614	511
80	73	mtr-miR172c-5p	GTAGCATCATCAAGATTCACA	21	arahy.Tifrunner.gnm1.Arahy.03	+	31212149	31212280	ctgttgttgtgtattttcttgaattttagagtgattttctctctatgttattactattgctctgtttgcttgtttgatatatatacaatcgatatttgtgaatGTAGCATCATCAAGATTCACAtacaaatg	20	mtr-MIR172c,mtr-MIR172b,gma-MIR172b,gma-MIR172f,gma-MIR172a,lja-MIR172b,vun-MIR172,aau-MIR172,ppe-MIR172a,nta-MIR172h,nta-MIR172e,nta-MIR172f,nta-MIR172i,nta-MIR172c,nta-MIR172d,lus-MIR172a,sly-MIR172b,eun-MIR172c,eun-MIR172a,ssl-MIR172,	mtr-MIR172c	tatttgcagatGTAGCATCATCAAGATTCACAtatgaaagtgcaaatggttttgttggattttgatctgatcgatgcaaatctaagttctccataggtcttttgaactgAGAATCTTGATGATGCTGCATcagccataa	mtr-miR172c-5p	GTAGCATCATCAAGATTCACA	3'	Yes	gp2b	...((((((((.....((((((....(((((.(.....).)))))............((((..(((..(..(((((((.........))))).))..)..)))..))))...))))))..)))).))))...	126	28.8	-27.3	0.7	71.5	62	83	55	41.5	24	17.5	45	179	105.5	46.5	53.5	71.5	96	146.5	66	58.5	120.5	27	23	58	125.5	73.5	334	95	49
81	73	mtr-miR172c-5p	GTAGCATCATCAAGATTCACA	21	arahy.Tifrunner.gnm1.Arahy.07	+	77273488	77273580	tagatGTAGCATCATCAAGATTCACAtgcaaatgtagaagcttgtgtatgtgggactttctgttttgaagtgagaatcttaatgctgcataga	20	mtr-MIR172c,mtr-MIR172b,gma-MIR172b,gma-MIR172f,gma-MIR172a,lja-MIR172b,vun-MIR172,aau-MIR172,ppe-MIR172a,nta-MIR172d,nta-MIR172h,nta-MIR172e,nta-MIR172f,nta-MIR172i,nta-MIR172c,lus-MIR172a,sly-MIR172b,eun-MIR172c,eun-MIR172a,ssl-MIR172,	mtr-MIR172c	tatttgcagatGTAGCATCATCAAGATTCACAtatgaaagtgcaaatggttttgttggattttgatctgatcgatgcaaatctaagttctccataggtcttttgaactgAGAATCTTGATGATGCTGCATcagccataa	mtr-miR172c-5p	GTAGCATCATCAAGATTCACA	5'	Yes	gp2b	...(((((((((....(((((((.(((...((..((((((((..(....)..)).).)))))..))...))).))))))).)))))))))...	87	36.6	-26.8	0.8	71.5	62	83	55	41.5	24	17.5	45	179	105.5	46.5	53.5	71.5	96	146.5	66	58.5	120.5	27	23	58	125.5	73.5	334	95	49
82	74	nta-MIR172e-p3_2ss15CG19TA	ATTGGAACGATACAGAGAA	19	arahy.Tifrunner.gnm1.Arahy.04	+	6525805	6525956	catgttcagtttctcttcttgactcggtaaagttccacatcgggtagtatcacgtccctctgacagaatatatggcagagggagcaagaaaggcttgtcccttcggggacatccgataaaATTGGAACGATACAGAGAAgattagcatggcc	2	nta-MIR172e,nta-MIR172f,	nta-MIR172e	gtttgcagatgtagcatcatcaagattcacataaaaaacgcatggtgatgagctgatgaaatgacattaatggccaaggcagctttctgaaggtgAGAATCTTGATGATGCTGCATcagcaataaacgactacctgatttatcattatgccattggaacgatacacagataattagcataattcatgtgcaagaatgccacgggtacatggtatggttcaattgatacagtcgttgtttgcgggtgtagcatcatcaagattcacatgaaaaggcaaggtgaaatgaaattaattaagagccatggctttttgaaggtgAGAATCTTGATGATGCTGCATcagcaataa	nta-MIR172e-p3	attggaacgatacacagat	3'	New	gp2b	((((((...(((((((..........(((..((((((.(((((...........((((((((.((.......)).))))))))............((((((....)))))).))))).....))))))..))))))))))...))))))...	149	46.7	-54.1	0.8	8	14	16.5	26	20.5	6	8	19	40.5	10	13	32.5	14	7.5	52	20.5	23.5	25.5	26	16.5	44	10	30	28.5	13	18
83	75	nta-MIR172e-p5_2ss14CG18TA	TTGGAACGATACAGAGAA	18	arahy.Tifrunner.gnm1.Arahy.04	+	6529565	6529659	aaTTGGAACGATACAGAGAAgattagcatggcccctgcgcaaggatgacacgcacaaatcgagaaatggtccaaatttttttttcccctccatcc	2	nta-MIR172e,nta-MIR172f,	nta-MIR172e	gtttgcagatgtagcatcatcaagattcacataaaaaacgcatggtgatgagctgatgaaatgacattaatggccaaggcagctttctgaaggtgAGAATCTTGATGATGCTGCATcagcaataaacgactacctgatttatcattatgccattggaacgatacacagataattagcataattcatgtgcaagaatgccacgggtacatggtatggttcaattgatacagtcgttgtttgcgggtgtagcatcatcaagattcacatgaaaaggcaaggtgaaatgaaattaattaagagccatggctttttgaaggtgAGAATCTTGATGATGCTGCATcagcaataa	nta-MIR172e-p5	ttggaacgatacacagat	5'	New	gp2b	...((((..((...((((((((((.((.((...(((.....)))....)).))....((((.....))))...))))))))))))...))))...	89	45.3	-12.2	0.3	13	27.5	18	29	16.5	16	22	23	75	15	13.5	40	14.5	15	80	29.5	32.5	46	49.5	26.5	75	27.5	48	24.5	13	25.5
84	76	gma-miR172b-5p_L-1R+3	TAGCATCATCAAGATTCACATG	22	arahy.Tifrunner.gnm1.Arahy.13	+	33124592	33124632	TAGCATCATCAAGATTCACATGcaaatgtagaagcttgtgt	12	gma-MIR172b,gma-MIR172f,gma-MIR172a,lja-MIR172b,vun-MIR172,aau-MIR172,nta-MIR172h,nta-MIR172e,nta-MIR172f,nta-MIR172c,eun-MIR172c,ssl-MIR172,	gma-MIR172a	ttaacagtcgttatttgcggatGTAGCATCATCAAGATTCACatgcaagcgcaggtggtgggtgggacttgatgcaatctaagtgctgtgccagccaagccataggtcttttggaactgAGAATCTTGATGATGCTGCATcagccataaacgacttcac	gma-miR172b-5p	GTAGCATCATCAAGATTCAC	5'	Diff	gp2b	......((.((((.(((((((....)))).))).)))))).	34	36.6	-8	0.5	3.5	0	0	4	0	0	0	3	4	0	0	0	0	3.5	3.5	0	0	3	0	0	3	2.5	2.5	3.5	0	0
85	77	lja-miR172a_R+1	AGAATCTTGATGATGCTGCAGT	22	arahy.Tifrunner.gnm1.Arahy.13	+	56524461	56524495	agccatgattatgAGAATCTTGATGATGCTGCAGC	3	lja-MIR172a,gra-MIR172b,cme-MIR172e,	lja-MIR172a	gctggtggagcatcatcaagattcacaagctttaaggggtggattgtgtttggggtggtccctaattgctccatatcaatttgctctttgatttgAGAATCTTGATGATGCTGCAGtagc	lja-miR172a	AGAATCTTGATGATGCTGCAG	3'	Diff	gp2b	.(((((.((((.(.....).)))).)))..))...	31	42.9	-4.7	0.3	8.5	4.5	8	11	7	2.5	0	3.5	24.5	5	10.5	10.5	10	4	13.5	4	4	9	0	0	5	6.5	5.5	6.5	4	2.5
86	77	lja-miR172a_R+1	AGAATCTTGATGATGCTGCAGT	22	arahy.Tifrunner.gnm1.Arahy.18	-	114580782	114580911	aaaagtataacaagactcattgatacttactgctcatgctgtacaatctttttactatgttaattacaccttttttttcacttagcttggtgattagccatgactatgAGAATCTTGATGATGCTGCAGT	4	lja-MIR172a,gra-MIR172b,csi-MIR172a,cme-MIR172e,	lja-MIR172a	gctggtggagcatcatcaagattcacaagctttaaggggtggattgtgtttggggtggtccctaattgctccatatcaatttgctctttgatttgAGAATCTTGATGATGCTGCAGtagc	lja-miR172a	AGAATCTTGATGATGCTGCAG	3'	Diff	gp2b	...(((((..((((((((((.(((...(((.((....)).)))..))).......(((((((((..((((..................)))))))))).)))...)))))..)))))...))))).....	122	33.1	-23.1	0.5	8.5	4.5	8	11	7	2.5	0	3.5	24.5	5	10.5	10.5	10	4	13.5	4	4	9	0	0	5	6.5	5.5	6.5	4	2.5
87	78	nta-MIR172e-p5_2ss15CG19TA	ATTGGAACGATACAGAGAA	19	arahy.Tifrunner.gnm1.Arahy.13	+	140834505	140834585	ATTGGAACGATACAGAGAAtattagcatggcccttacacaaggatgacccgtgcaaatcgagaaaaaaatgtttggtgaga	2	nta-MIR172e,nta-MIR172f,	nta-MIR172e	gtttgcagatgtagcatcatcaagattcacataaaaaacgcatggtgatgagctgatgaaatgacattaatggccaaggcagctttctgaaggtgAGAATCTTGATGATGCTGCATcagcaataaacgactacctgatttatcattatgccattggaacgatacacagataattagcataattcatgtgcaagaatgccacgggtacatggtatggttcaattgatacagtcgttgtttgcgggtgtagcatcatcaagattcacatgaaaaggcaaggtgaaatgaaattaattaagagccatggctttttgaaggtgAGAATCTTGATGATGCTGCATcagcaataa	nta-MIR172e-p5	attggaacgatacacagat	5'	New	gp2b	........................((((((.((((....)))).....))))))..((((((.........))))))....	1	40.7	-11	0.3	8	14	16.5	26	20.5	6	8	19	40.5	10	13	32.5	14	7.5	52	20.5	23.5	25.5	26	16.5	44	10	30	28.5	13	18
88	79	nta-MIR172e-p3_2ss14CG18TA	TTGGAACGATACAGAGAA	18	arahy.Tifrunner.gnm1.Arahy.14	+	8006001	8006031	acatccgataaaaTTGGAACGATACAGAGAA	2	nta-MIR172e,nta-MIR172f,	nta-MIR172e	gtttgcagatgtagcatcatcaagattcacataaaaaacgcatggtgatgagctgatgaaatgacattaatggccaaggcagctttctgaaggtgAGAATCTTGATGATGCTGCATcagcaataaacgactacctgatttatcattatgccattggaacgatacacagataattagcataattcatgtgcaagaatgccacgggtacatggtatggttcaattgatacagtcgttgtttgcgggtgtagcatcatcaagattcacatgaaaaggcaaggtgaaatgaaattaattaagagccatggctttttgaaggtgAGAATCTTGATGATGCTGCATcagcaataa	nta-MIR172e-p3	ttggaacgatacacagat	3'	New	gp2b	...((((((...)))))).............	15	35.5	-3.6	0.3	13	27.5	18	29	16.5	16	22	23	75	15	13.5	40	14.5	15	80	29.5	32.5	46	49.5	26.5	75	27.5	48	24.5	13	25.5
89	80	mtr-miR172c-5p_1ss21AC	GTAGCATCATCAAGATTCACC	21	arahy.Tifrunner.gnm1.Arahy.17	-	19182430	19182553	attgtgtactttcttggattttggagtgattctctctctatgttattattgttgctctgtttgcttacttgatatatatacagtcgattatgtttatgaagGTAGCATCATCAAGATTCACAta	18	mtr-MIR172c,gma-MIR172b,gma-MIR172f,gma-MIR172a,lja-MIR172b,vun-MIR172,aau-MIR172,ppe-MIR172a,nta-MIR172d,nta-MIR172h,nta-MIR172e,nta-MIR172f,nta-MIR172i,nta-MIR172c,lus-MIR172a,eun-MIR172c,eun-MIR172a,ssl-MIR172,	mtr-MIR172c	tatttgcagatGTAGCATCATCAAGATTCACAtatgaaagtgcaaatggttttgttggattttgatctgatcgatgcaaatctaagttctccataggtcttttgaactgAGAATCTTGATGATGCTGCATcagccataa	mtr-miR172c-5p	GTAGCATCATCAAGATTCACA	3'	Diff	gp2b	..((((.....((((((.....((((..((....................))..))))...((((..(((.(((.(((((........))))).))).)))..))))...))))))..))))..	120	31.5	-24.6	0.6	0	0	0	0	0	0	0	0	2.5	0	0	0	0	0	0	0	0	7	0	0	0	0	0	0	0	0
90	81	gma-MIR319d-p5_1ss2TA	AACTGCTGACTCATTCATACACA	23	arahy.Tifrunner.gnm1.Arahy.10	+	78642200	78642335	AACTGCTGACTCATTCATACACActaacagtagggttaattaaatgatgctaatactactgtaattgtgtgaatgaagcgggagatattttgcattatcctctttctctgtgcTTGGACTGAAGGGGAGCTCCTtc	5	gma-MIR319d,gma-MIR319i,gma-MIR319o,mdm-MIR319d,cme-MIR319c,	gma-MIR319d	agagtgaaggagcttcctttagcccacacatggttaggggattaaagggttgctgaagtatctgctgactcattcatacacatagaatagtgattcaaattgctaaggtaattgtgtgaatgaagcaggggacattttgcatccttctttctatgtgctTGGACTGAAGGGGAGCTCCTTCtttctgttg	gma-MIR319d-p5	atctgctgactcattcatacaca	5'	New	gp2b	..((.(((..(((((((((((.....(((((((..(((............)))..)))))))...)))))))))))..))).)).......((....((((((((.(((......)))..))))))))))......	82	39.7	-38.8	0.7	0	0	0	2.5	0	0	0	0	2.5	0	0	0	0	2.5	0	0	0	0	0	0	0	0	0	0	0	0
90	82	gma-miR319d_L+1R-2	TTGGACTGAAGGGGAGCTCCT	21	arahy.Tifrunner.gnm1.Arahy.10	+	78642200	78642335	AACTGCTGACTCATTCATACACActaacagtagggttaattaaatgatgctaatactactgtaattgtgtgaatgaagcgggagatattttgcattatcctctttctctgtgcTTGGACTGAAGGGGAGCTCCTtc	5	gma-MIR319d,gma-MIR319i,gma-MIR319o,mdm-MIR319d,cme-MIR319c,	gma-MIR319o	gagagtgaaggagcttccttcagcccatgcatggattcaagggattaaagggttgctggagtatctgctgactcattcatacacacacagtacgtagtgctttcaaattgctagtgtaattgtgtgaatgaagcaggtgatattttgcacccctcttttctctgtgctTGGACTGAAGGGGAGCTCCTTCtttct	gma-miR319d	TGGACTGAAGGGGAGCTCCTTC	3'	Diff	gp2b	..((.(((..(((((((((((.....(((((((..(((............)))..)))))))...)))))))))))..))).)).......((....((((((((.(((......)))..))))))))))......	82	39.7	-38.8	0.7	1157	579	1188	1540	810	147.5	165.5	237.5	1958	507	268.5	404	507	745.5	1096.5	422	794.5	715	346.5	251.5	362.5	524.5	855.5	826	553	398
91	81	gma-MIR319d-p5_1ss2TA	AACTGCTGACTCATTCATACACA	23	arahy.Tifrunner.gnm1.Arahy.20	+	100921480	100921615	AACTGCTGACTCATTCATACACActaacagtagggttaattaaatgatgctaatactactgtaattgtgtgaatgaagcgggagatattttgcattatcctctttctctgtgcTTGGACTGAAGGGGAGCTCCTtc	5	gma-MIR319d,gma-MIR319i,gma-MIR319o,mdm-MIR319d,cme-MIR319c,	gma-MIR319d	agagtgaaggagcttcctttagcccacacatggttaggggattaaagggttgctgaagtatctgctgactcattcatacacatagaatagtgattcaaattgctaaggtaattgtgtgaatgaagcaggggacattttgcatccttctttctatgtgctTGGACTGAAGGGGAGCTCCTTCtttctgttg	gma-MIR319d-p5	atctgctgactcattcatacaca	5'	New	gp2b	..((.(((..(((((((((((.....(((((((..(((............)))..)))))))...)))))))))))..))).)).......((....((((((((.(((......)))..))))))))))......	82	39.7	-38.8	0.7	0	0	0	2.5	0	0	0	0	2.5	0	0	0	0	2.5	0	0	0	0	0	0	0	0	0	0	0	0
91	82	gma-miR319d_L+1R-2	TTGGACTGAAGGGGAGCTCCT	21	arahy.Tifrunner.gnm1.Arahy.20	+	100921480	100921615	AACTGCTGACTCATTCATACACActaacagtagggttaattaaatgatgctaatactactgtaattgtgtgaatgaagcgggagatattttgcattatcctctttctctgtgcTTGGACTGAAGGGGAGCTCCTtc	5	gma-MIR319d,gma-MIR319i,gma-MIR319o,mdm-MIR319d,cme-MIR319c,	gma-MIR319o	gagagtgaaggagcttccttcagcccatgcatggattcaagggattaaagggttgctggagtatctgctgactcattcatacacacacagtacgtagtgctttcaaattgctagtgtaattgtgtgaatgaagcaggtgatattttgcacccctcttttctctgtgctTGGACTGAAGGGGAGCTCCTTCtttct	gma-miR319d	TGGACTGAAGGGGAGCTCCTTC	3'	Diff	gp2b	..((.(((..(((((((((((.....(((((((..(((............)))..)))))))...)))))))))))..))).)).......((....((((((((.(((......)))..))))))))))......	82	39.7	-38.8	0.7	1157	579	1188	1540	810	147.5	165.5	237.5	1958	507	268.5	404	507	745.5	1096.5	422	794.5	715	346.5	251.5	362.5	524.5	855.5	826	553	398
92	83	gma-MIR319k-p3_1ss18GA	TGTGAATGATGCAGGAGATA	20	arahy.Tifrunner.gnm1.Arahy.01	+	8541411	8541587	tttaagagagcttccttcagtccactcatggacgaataaagggattcgaattagctgctgactcattcattcaaacgcaatagaacacgtgatatgctattgcgaatgTGTGAATGATGCAGGAGATAatttcatccttttttcgtctttgcttggactgaagggagctccctttca	18	mtr-MIR319a,gma-MIR319k,gma-MIR319i,aau-MIR319,amg-MIR319,ptc-MIR319f,ptc-MIR319g,ptc-MIR319c,ath-MIR319c,mdm-MIR319e,mdm-MIR319g,mdm-MIR319f,mes-MIR319h,mes-MIR319c,sly-MIR319b,cas-MIR319c,rco-MIR319c,cca-MIR319,	gma-MIR319k	agtttaagagagcttccttcagtccactcatggatgggtagagggtttgaattagctgctgactcattcattcaaacacaatagaattagtatcatggtatgctattgtgaatgtgtgaatgatgcaggaggtaaagttcatccttttcttgtctttgcTTGGACTGAAGGGAGCTCCCttttact	gma-MIR319k-p3	tgtgaatgatgcaggaggta	3'	New	gp2b	...(((.(((((((((((((((((..((..((((((.((((((((..((((((.((.(((..(((((((..((..((((((((.............))))))))..))..)))))))..))).)).)))))).))))))))))))))..))..))))))))))))))))).)))...	171	41.2	-82.8	1.1	6	0	14	19	0	0	0	0	24.5	0	0	0	0	12	18.5	6	0	10	0	0	0	6	30.5	24	14	5
93	84	mtr-MIR319a-p5_1ss18GA	TGTGAATGATGCAGGAGAT	19	arahy.Tifrunner.gnm1.Arahy.02	-	83590959	83590988	TGTGAATGAAGCAGGAGATgttcctgtaga	17	mtr-MIR319a,gma-MIR319i,gma-MIR319k,aau-MIR319,amg-MIR319,ptc-MIR319c,ptc-MIR319f,ptc-MIR319g,ath-MIR319c,mdm-MIR319e,mdm-MIR319g,mdm-MIR319f,mes-MIR319c,mes-MIR319h,sly-MIR319b,cas-MIR319c,rco-MIR319c,	mtr-MIR319a	attattagaaatagatgaagAGAGCTTCCTTCAGTCCACTCatggaagggtaaggggtttgaattacctgctgactcattgattcaaacacaatagacaattatggggttatgctattgtgaatgtgtgaatgatgcaggaggtgaatttcttccttttcttctttgcTTGGACTGAAGGGAGCTCCCtttttctatttataaatta	mtr-MIR319a-p5	tgtgaatgatgcaggaggt	5'	New	gp2b	..........(((((((...)))))))...	17	43.3	-7.3	0.6	0	0	0	0	0	0	0	0	4.5	0	0	0	0	3	3.5	0	0	0	0	0	0	0	3.5	7	0	0
94	85	gma-MIR319p-p3_2ss18CT19CT	TTGGACTGAAGGGAGCTTTT	20	arahy.Tifrunner.gnm1.Arahy.04	-	21995573	21995697	ttttcccttctgtccttgtccttgaggctacttactctccttgctcaattctgcatatggcccttgggtctcaacataagccttctgtgcttgagctacaactcTTGGAATGAAGGGAGCTTTTt	34	gma-MIR319p,gma-MIR319q,gma-MIR319l,gma-MIR319g,gma-MIR319c,vun-MIR319b,pvu-MIR319c,ptc-MIR319e,ptc-MIR319h,ptc-MIR319f,ptc-MIR319g,ath-MIR159b,ath-MIR319c,mdm-MIR319h,mdm-MIR319c,stu-MIR319b,aly-MIR159b,aly-MIR319c,aly-MIR319d,mes-MIR319g,mes-MIR319f,mes-MIR319h,vvi-MIR319e,csi-MIR159d,lus-MIR159c,cme-MIR319d,cme-MIR319c,fve-MIR319,sly-MIR319c,cas-MIR159c,cas-MIR159b,cas-MIR319c,rco-MIR319d,aqc-…	gma-MIR319p	gaaatgggagttccttgcagcccaaagcttcaaggatgaaattcttcctgcggttTTGGACTGAAGGGAGCTCCTactt	gma-MIR319p-p3	TTGGACTGAAGGGAGCTCCT	3'	New	gp2b	..((((((((..(((........(((........))).....((((((....(((((.(((...((........))...)))...)))))))))))..........)))..))))))))......	117	45.6	-34.3	0.6	6	0	3.5	2.5	2.5	0	0	0	22	0	0	5	0	7	7.5	0	0	8.5	0	0	2.5	11.5	5	11.5	10.5	0
95	86	pvu-miR319c_2ss6CT19CT	TTGGATTGAAGGGAGCTCTTT	21	arahy.Tifrunner.gnm1.Arahy.09	-	11187520	11187657	caaggatgccttctctccttcctgttcttgtttctgaagtgacttactttctttgctcaactctggatatggctattgtgaatcaacataaacattttgggcttgagccacaactcTTGGATTGAAGGGATCTCTTTc	29	gma-MIR319g,gma-MIR319c,gma-MIR319q,gma-MIR319l,vun-MIR319b,pvu-MIR319c,ptc-MIR159d,ptc-MIR319g,ptc-MIR319f,ath-MIR159b,ath-MIR159c,ath-MIR319c,mdm-MIR319h,aly-MIR159b,aly-MIR159c,aly-MIR319d,aly-MIR319c,mes-MIR319g,csi-MIR159a,lus-MIR159c,lus-MIR159b,cme-MIR319d,fve-MIR159c,sly-MIR319c,cas-MIR159b,cas-MIR159c,cas-MIR159a,cas-MIR319c,rco-MIR319d,	pvu-MIR319c	gagagtgaaggagcttccctcagcccattcatggatacaaaagattgggttgcaaaattaaccactaactcattcacacaatagtattcagttagggtgatgctctttttgctataatatgattgtgtgaatgaagtgatgcatacatattgtgtgaccctctttctctgagcTTGGACTGAAGGGAGCTCCTTctttctgttg	pvu-miR319c	TTGGACTGAAGGGAGCTCCTT	3'	Diff	gp2b	.((((((.(((((..(((.....(((.........((((((...))))))....((((((..(..((.(((..(((.((......)))))..)))))..)..))))))...)))....)))..))))).))).)))..	135	41.3	-34.6	0.6	107.5	83	112.5	121	69.5	14	9.5	20.5	194.5	49	28.5	56	49.5	76.5	115	70.5	93.5	73.5	31	34	35.5	96.5	81	90.5	73.5	54.5
96	87	mtr-miR319a-3p_R+1_1	TTGGACTGAAGGGAGCTCCCA	21	arahy.Tifrunner.gnm1.Arahy.11	-	2306413	2306498	attgttcatatttcatatatttgataatcaaagggttataaataaaatataatgttctttacTTGGACTGAAGGGAGCTCCCTttc	41	mtr-MIR319c,gma-MIR319e,gma-MIR319h,gma-MIR319g,gma-MIR319c,gma-MIR319q,vun-MIR319b,pvu-MIR319c,ptc-MIR319d,ptc-MIR319c,ptc-MIR319b,ptc-MIR319g,ptc-MIR319f,ath-MIR319a,mdm-MIR319c,mdm-MIR319h,aly-MIR319a,aly-MIR319b,ppe-MIR319a,mes-MIR319c,mes-MIR319d,mes-MIR319a,mes-MIR319e,mes-MIR319h,mes-MIR319g,vvi-MIR319b,vvi-MIR319g,nta-MIR319a,csi-MIR159c,lus-MIR319b,cme-MIR319b,cme-MIR319c,sly-MIR319c,cas…	mtr-MIR319c	cagaaatgGGAGTTCCTTGCAGCCCAAAGcgccaagtgagaattctactggcaaattatgttTTGGACTGAAGGGAGCTCCCagttctt	mtr-miR319a-3p	TTGGACTGAAGGGAGCTCCC	3'	Diff	gp2b	.......((((((....((((((.(((((....)))))))))))))))))...((((.......)))).((((((....)))))).	16	27.9	-14	0.6	5774.83	2999	5577	5070.17	3780.5	1233	1072	1030.83	9782.17	2506.33	1108.67	2904.83	3146.83	4789.33	6971.67	3442.5	5739.33	5108	2688.67	1915.83	3514	7434.67	4585.33	6985.67	4177.33	3080.83
97	87	mtr-miR319a-3p_R+1_1	TTGGACTGAAGGGAGCTCCCA	21	arahy.Tifrunner.gnm1.Arahy.15	-	16645774	16645809	acTTGGACTGAAGGGAGCTCCCTttttttgttcttc	43	mtr-MIR319a,mtr-MIR319c,gma-MIR319b,gma-MIR319h,gma-MIR319e,gma-MIR319q,gma-MIR319g,gma-MIR319c,vun-MIR319b,pvu-MIR319c,ptc-MIR319d,ptc-MIR319c,ptc-MIR319b,ptc-MIR319f,ptc-MIR319g,ath-MIR319a,mdm-MIR319h,mdm-MIR319c,aly-MIR319a,aly-MIR319b,ppe-MIR319a,mes-MIR319c,mes-MIR319d,mes-MIR319e,mes-MIR319a,mes-MIR319g,mes-MIR319h,vvi-MIR319b,vvi-MIR319g,nta-MIR319a,csi-MIR159c,lus-MIR319b,cme-MIR319b,cme…	mtr-MIR319c	cagaaatgGGAGTTCCTTGCAGCCCAAAGcgccaagtgagaattctactggcaaattatgttTTGGACTGAAGGGAGCTCCCagttctt	mtr-miR319a-3p	TTGGACTGAAGGGAGCTCCC	5'	Diff	gp2b	....((((.((((((....))))))....))))...	29	44.4	-9.6	0.6	5774.83	2999	5577	5070.17	3780.5	1233	1072	1030.83	9782.17	2506.33	1108.67	2904.83	3146.83	4789.33	6971.67	3442.5	5739.33	5108	2688.67	1915.83	3514	7434.67	4585.33	6985.67	4177.33	3080.83
98	88	pvu-miR319c_R+1_2ss6CT19CT	TTGGATTGAAGGGAGCTCTTTC	22	arahy.Tifrunner.gnm1.Arahy.13	-	143829929	143829999	cTTGGAATGAAGGGAGCTCTTTCttgaaaattgcgtcgagaccttccttgaccgttgccccttctacctgc	26	gma-MIR319q,gma-MIR319g,gma-MIR319c,gma-MIR319l,vun-MIR319b,pvu-MIR319c,ptc-MIR319f,ptc-MIR319g,ptc-MIR159d,ath-MIR319c,ath-MIR159b,ath-MIR159c,aly-MIR159b,aly-MIR319c,aly-MIR319d,aly-MIR159c,mes-MIR319g,csi-MIR159a,lus-MIR159c,lus-MIR159b,cme-MIR319d,fve-MIR159c,cas-MIR319c,cas-MIR159c,cas-MIR159a,rco-MIR319d,	pvu-MIR319c	gagagtgaaggagcttccctcagcccattcatggatacaaaagattgggttgcaaaattaaccactaactcattcacacaatagtattcagttagggtgatgctctttttgctataatatgattgtgtgaatgaagtgatgcatacatattgtgtgaccctctttctctgagcTTGGACTGAAGGGAGCTCCTTctttctgttg	pvu-miR319c	TTGGACTGAAGGGAGCTCCTT	5'	Diff	gp2b	...((...((((((.((((......))....((.((((((......))))))))..))))))))..))...	65	50.7	-19.2	0.5	0	0	0	3.5	2.5	0	0	0	0	0	0	0	0	4	3.5	0	0	0	0	0	0	0	0	2.5	4	0
99	89	gma-MIR319p-p5_2ss18CT19CT	TTGGACTGAAGGGAGCTTTT	20	arahy.Tifrunner.gnm1.Arahy.18	+	94670151	94670214	TTGGACTGAAGGAAGCTTTTtcactcttgttccctcctaatatgagcacatctccttccttgta	34	gma-MIR319p,gma-MIR319q,gma-MIR319l,gma-MIR319g,gma-MIR319c,vun-MIR319b,pvu-MIR319c,ptc-MIR319e,ptc-MIR319h,ptc-MIR319f,ptc-MIR319g,ath-MIR319c,ath-MIR159b,mdm-MIR319h,mdm-MIR319c,stu-MIR319b,aly-MIR319c,aly-MIR319d,aly-MIR159b,mes-MIR319g,mes-MIR319f,mes-MIR319h,vvi-MIR319e,csi-MIR159d,lus-MIR159c,cme-MIR319d,cme-MIR319c,fve-MIR319,sly-MIR319c,cas-MIR319c,cas-MIR159c,cas-MIR159b,rco-MIR319d,aqc-…	gma-MIR319p	gaaatgggagttccttgcagcccaaagcttcaaggatgaaattcttcctgcggttTTGGACTGAAGGGAGCTCCTactt	gma-MIR319p-p5	TTGGACTGAAGGGAGCTCCT	5'	New	gp2b	........(((((((........(((.((((.......)))).)))........)))))))...	53	42.2	-10.2	0.4	6	0	3.5	2.5	2.5	0	0	0	22	0	0	5	0	7	7.5	0	0	8.5	0	0	2.5	11.5	5	11.5	10.5	0
100	90	lus-MIR319b-p5_2ss5AC18GC	AATGCGGGCTCCTTTCAC	18	arahy.Tifrunner.gnm1.scaffold_22	+	163879	163930	gAATGCGGGCTCCTTTCACttgaatgaattcttttcttcggaggctgcaagg	1	lus-MIR319b,	lus-MIR319b	gctctgtgaagaagaaatgtgcagaaatgagggctcctttcagcctaaaaactacaggttttctcagacaagatcctgtttcttTTGGACTGAAGGGAGCTCCCagttcttcagtttctttcatctgc	lus-MIR319b-p5	aatgagggctcctttcag	5'	New	gp2b	...(((((.((((.(((....))).(((.....)))...)))).)))))...	46	48.1	-15.6	0.6	2.5	0	0	0	0	0	0	0	5	0	0	0	0	5	3	3	0	0	0	0	0	0	3.5	4	0	0
101	90	lus-MIR319b-p5_2ss5AC18GC	AATGCGGGCTCCTTTCAC	18	arahy.Tifrunner.gnm1.scaffold_22	+	1547228	1547257	AATGCGGGCTCCTTTCACttgagtgaattc	1	lus-MIR319b,	lus-MIR319b	gctctgtgaagaagaaatgtgcagaaatgagggctcctttcagcctaaaaactacaggttttctcagacaagatcctgtttcttTTGGACTGAAGGGAGCTCCCagttcttcagtttctttcatctgc	lus-MIR319b-p5	aatgagggctcctttcag	5'	New	gp2b	.............(((((....)))))...	14	46.7	-4	0.3	2.5	0	0	0	0	0	0	0	5	0	0	0	0	5	3	3	0	0	0	0	0	0	3.5	4	0	0
102	91	ptc-miR394a-5p_R+1	TTGGCATTCTGTCCACCTCCT	21	arahy.Tifrunner.gnm1.Arahy.08	+	3185532	3185710	gattgtgtttgttcacgttgggcttaacaaagcgttgtttacagagtttaTTGGCATTCTGTCCACCTCCTccgatcttcgttctttttgacaccaaaattcttggggaggtggacatactgccaacagAGCTCTGTTAGCTTCTCTTTGtaaaaatccttcgtgatatatacatatat	14	ptc-MIR394b,ath-MIR394b,ath-MIR394a,mdm-MIR394b,mdm-MIR394a,aly-MIR394b,aly-MIR394a,ppe-MIR394a,cme-MIR394a,fve-MIR394,sly-MIR394,bna-MIR394a,cas-MIR394,ssl-MIR394,	ptc-MIR394b	tcatgtggatttagcaaagggtttcttacagagtttaTTGGCATTCTGTCCACCTCCtatctttagaaattagaatatctctttcatatggaggtgggcatactgccaaccgagctCTGTTGGTCTCTCTTTGTAAaaccctcgtga	ptc-miR394a-5p	TTGGCATTCTGTCCACCTCC	5'	Diff	gp2b	...(((((.((((((((..((..((.((((((....(((.(((((((((.((((((...(((((((((((.((((..........(((((....)))))...)))))))))))))))...))))))..))))))))).)))....))))))..))..))..))))).))).)))))...	173	40.2	-67.7	0.9	0	0	0	2.5	0	0	0	0	4.5	0	0	0	0	0	0	0	0	0	0	0	0	3.5	0	6	0	0
102	92	mdm-MIR394a-p3_1ss10GA	AGCTCTGTTAGCTTCTCTTTG	21	arahy.Tifrunner.gnm1.Arahy.08	+	3185532	3185710	gattgtgtttgttcacgttgggcttaacaaagcgttgtttacagagtttaTTGGCATTCTGTCCACCTCCTccgatcttcgttctttttgacaccaaaattcttggggaggtggacatactgccaacagAGCTCTGTTAGCTTCTCTTTGtaaaaatccttcgtgatatatacatatat	14	ptc-MIR394b,ath-MIR394b,ath-MIR394a,mdm-MIR394b,mdm-MIR394a,aly-MIR394b,aly-MIR394a,ppe-MIR394a,cme-MIR394a,fve-MIR394,sly-MIR394,bna-MIR394a,cas-MIR394,ssl-MIR394,	mdm-MIR394a	tcacgtgggttttgcaaagagtttcttacagagttctTTGGCATTCTGTCCACCTCCcccctctctctgtgtgtctgtggctcaatggatggaggtgggcatactgccaacagagctctgttggcttctctttgtaaaacccccgtga	mdm-MIR394a-p3	agctctgttggcttctctttg	3'	New	gp2b	...(((((.((((((((..((..((.((((((....(((.(((((((((.((((((...(((((((((((.((((..........(((((....)))))...)))))))))))))))...))))))..))))))))).)))....))))))..))..))..))))).))).)))))...	173	40.2	-67.7	0.9	0	0	3.5	0	0	0	0	0	0	0	0	0	0	0	0	0	2.5	0	0	0	0	0	0	0	0	0
103	93	mtr-miR395g_1ss14GA	TTGAAGTGTTTGGAGGAACTC	21	arahy.Tifrunner.gnm1.Arahy.03	+	134388174	134388307	catctggtgttccctagagttcccctgatcacttcattaagagatctcttttttcattttctacaaagattcaatcattcatcattctttcttcctaTTGAAGTGTTTGGAGGAACTCctggaatcaccggtga	7	mtr-MIR395g,aly-MIR395i,lus-MIR395e,cme-MIR395c,cme-MIR395b,cca-MIR395b,cca-MIR395c,	mtr-MIR395g	gagttcctctgaacgcttcatataagaggttatccatcttcaTTGAAGTGTTTGGGGGAACTC	mtr-miR395g	TTGAAGTGTTTGGGGGAACTC	3'	Diff	gp2b	((.((((((((((...(((((((.(..(.(((((((.((.((((.......)))).........(((((................))))).....)).))))))).)..).)))))))..)))).)))))))).	133	38.8	-40.4	0.8	0	0	0	4	0	0	0	0	0	0	0	0	0	0	0	0	3	2.5	0	0	0	0	0	3.5	3	0
104	93	mtr-miR395g_1ss14GA	TTGAAGTGTTTGGAGGAACTC	21	arahy.Tifrunner.gnm1.Arahy.13	+	137199452	137199586	catctggtgttccctagagttcccctgatcacttcattaagagatctctttttttcattttcttcaaagattcaatttttcatcattctttcttcctaTTGAAGTGTTTGGAGGAACTCctggaatcaccggtga	7	mtr-MIR395g,aly-MIR395i,lus-MIR395e,cme-MIR395c,cme-MIR395b,cca-MIR395b,cca-MIR395c,	mtr-MIR395g	gagttcctctgaacgcttcatataagaggttatccatcttcaTTGAAGTGTTTGGGGGAACTC	mtr-miR395g	TTGAAGTGTTTGGGGGAACTC	3'	Diff	gp2b	((.((((((((((...(((((((.(..(.(((((((.((.((((........)))).........(((((................))))).....)).))))))).)..).)))))))..)))).)))))))).	134	37.8	-40.7	0.8	0	0	0	4	0	0	0	0	0	0	0	0	0	0	0	0	3	2.5	0	0	0	0	0	3.5	3	0
[truncated: 2,238 more rows]
[truncated: 27 more columns]
