# Supplementary material for: Integration of Small RNA and Degradome Sequencing Reveals the Regulatory Network of Al-Induced Programmed Cell Death in Peanut
Source: Int J Mol Sci. 2021 Dec 27;23(1):246. doi: 10.3390/ijms23010246 (PMC8745729; doi:10.3390/ijms23010246)
Supplement: Supplementary file 1 [file ijms-23-00246-s001.zip › Table S3 Differentially expressed miRNAs under Aluminum Stress.xlsx]

## Sheet: Sheet1
Table S3 Differentially expressed miRNAs under Aluminum Stress
T0hvsT8h
family	miR_name	miR_seq	up/down	log2(fold_change)	T0h(mean)	T8h(mean)	Expression level
MIR160	ahy-miR160-3p	GCATGAAGGGAGTCACGCAGG	up	2.26835	17.1575	82.6599	middle
MIR172	lja-miR172a_R+1	AGAATCTTGATGATGCTGCAGT	up	1.39474	4.71298	12.3924	middle
MIR2916	peu-MIR2916-p5_1ss5AG	TACCGTCCTAGTCTCAACCATA	up	1.44155	1839.33	4995.87	high
MIR6300	gma-MIR6300-p3_1ss8AG	TAGTGGTGAGTATTCCCGCC	up	2.3354	1.86467	9.41087	middle
MIR6300	gma-MIR6300-p5_1ss12AG	AGTATAGTGGTGAGTATTCCCGCC	up	1.95673	2.54003	9.8599	middle
MIR6300	gma-miR6300_R+3	GTCGTTGTAGTATAGTGGTGA	up	1.10798	10.8221	23.3263	middle
	PC-3p-78662_117	ACACAGAGAGAATGAATAAGGACC	up	2.55065	1.49187	8.74088	middle
	PC-3p-84529_105	ACTGACTGCACCTGAGTTTTCATC	down	-2.87413	14.1572	1.93098	middle
	PC-5p-169221_34	TAGTCCTGTTATTATAAATCCGCT	up	1.96295	2.43448	9.49106	middle
	PC-5p-81127_112	ATATCCAATCTGGCCCTGAGCTTT	down	-2.33122	11.6607	2.31717	middle
T8hvsT8h_0
family	miR_name	miR_seq	up/down	log2(fold_change)	T8h_0(mean)	T8h(mean)	Expression level
MIR160	ahy-miR160-3p	GCATGAAGGGAGTCACGCAGG	up	2.0598	19.826	82.6599	middle
MIR319	gma-miR319d_L+1R-2_1ss21TA	TTGGACTGAAGGGGAGCTCCA	down	-2.1506	40.0754	9.02574	middle
MIR6300	gma-MIR6300-p3_1ss8AG	TAGTGGTGAGTATTCCCGCC	up	2.60109	1.55104	9.41087	middle
MIR6300	gma-MIR6300-p5_1ss12AG	AGTATAGTGGTGAGTATTCCCGCC	up	2.7508	1.46488	9.8599	middle
	PC-3p-40048_280	ATACCCTAAATGATGTCGTTG	down	-1.81494	17.2256	4.8958	middle
	PC-5p-2836_4089	TGTCGCAGGAGAAATAGCACC	up	5.10788	2.51449	86.7114	middle
	PC-5p-362_25410	AGGACACGGCGAATCCTCTATT	up	2.14938	152.396	676.086	high
T0hvsT24h
family	miR_name	miR_seq	up/down	log2(fold_change)	T0h(mean)	T24h(mean)	Expression level
MIR10420	gma-miR10420_L+1R-2	ACCTGAACCATCATTTTT	up	2.38477	98.21	512.913	middle
MIR10420	gma-miR10420_R-1_1ss5AG	CCTGGACCATCATTTTTT	up	1.4149	9.37839	25.0066	middle
MIR11096	lja-MIR11096a-p3_2ss11GT21GC	TAATTTTGAATTTTGGGGACC	down	-2.62379	13.666	2.21719	middle
MIR11096	lja-MIR11096a-p5_2ss11GT21GC	TAATTTTGAATTTTGGGGACC	down	-2.62379	13.666	2.21719	middle
MIR156	csi-miR156h-5p_2ss15AG20TA	ACAGAAGATAGAGAGCACAAA	down	-3.34391	48.7766	4.80391	middle
MIR159	ath-miR159c_L-1R+2_1ss20CT	TTGGATTGAAGGGAGCTCTTTT	down	-2.35341	31.0758	6.08102	middle
MIR166	mtr-miR166e-5p_2ss10GT21GA	GGAATGTTGTCTGGCTCGAGA	up	1.75826	95.9744	324.672	middle
MIR166	mtr-miR166e-5p_2ss8TC10GT	GGAATGTCGTCTGGCTCGAGG	down	-2.57729	148.157	24.8245	middle
MIR167	ahy-miR167-3p_L-1	GATCATGTGGCAGTTTCACC	up	1.12192	173.886	378.439	middle
MIR171	lja-miR171d-5p	TTGAGCCGCGCCAATATCACT	down	-1.48626	117.589	41.9717	middle
MIR171	gma-miR171k-3p	TTGAGCCGCGCCAATATCACT	down	-1.48626	117.589	41.9717	middle
MIR172	mtr-miR172c-5p_L-1R+1	TAGCATCATCAAGATTCACAT	up	1.24497	36.9111	87.4843	middle
MIR172	nta-MIR172e-p3_2ss15CG19TA	ATTGGAACGATACAGAGAA	up	1.90065	9.11654	34.0394	middle
MIR172	nta-MIR172e-p5_2ss15CG19TA	ATTGGAACGATACAGAGAA	up	1.90065	9.11654	34.0394	middle
MIR2592	mtr-MIR2592bj-p5_2ss12TC19AT	ATTCCCACTGTCCCTGTCTA	up	3.09536	4.12623	35.2654	middle
MIR3508	ahy-miR3508	TAGAGGGTCCCCATGTTCTCA	up	2.17793	641.526	2902.94	high
MIR390	mtr-miR390_R+1	AAGCTCAGGAGGGATAGCGCCA	down	-1.65382	33.9126	10.7773	middle
MIR393	mtr-miR393a_R+1	TCCAAAGGGATCGCATTGATCC	down	-2.43831	10.0144	1.84766	middle
MIR395	gma-miR395d_1ss21TC	TGAAGTGTTTGGGGGAACTTC	down	-2.29986	12.7372	2.58672	middle
MIR397	mtr-miR397-5p	TCATTGAGTGCAGCGTTGATG	up	2.19136	49.6569	226.801	middle
MIR398	mtr-miR398b	TGTGTTCTCAGGTCGCCCCTG	up	2.23403	61.0333	287.129	middle
MIR408	ahy-miR408-3p_L-1R+1_1	TGCACTGCCTCTTCCCTGGCA	up	2.43504	178.068	962.957	middle
MIR408	ahy-miR408-3p_L-1R+1_2	TGCACTGCCTCTTCCCTGGCT	up	2.43504	178.068	962.957	middle
MIR482	gma-miR482a-3p_L-2_1ss14GA	TTCCCAATTCCACCCATTCCTA	down	-1.04465	44649.4	21644.4	high
MIR530	eun-MIR530-p3_2ss3AT17CA	GATGAAGAACGTAGCGAA	up	3.46251	7.34357	80.9519	middle
MIR530	eun-MIR530-p5_2ss3AT17CA	GATGAAGAACGTAGCGAA	up	3.46251	7.34357	80.9519	middle
MIR6300	gma-MIR6300-p3	TAGTGGTAAGTATTCCCGCC	up	3.33612	14.7356	148.813	middle
MIR6300	gma-MIR6300-p3_1ss13CT	GTGGTAAGTATTTCCGCC	up	3.68345	2.89899	37.2458	middle
MIR6300	gma-MIR6300-p3_1ss15CT	TAGTGGTAAGTATTTCCGCC	up	3.10438	4.43999	38.185	middle
MIR6300	gma-MIR6300-p5_1ss12AG	AGTATAGTGGTGAGTATTCCCGCC	up	2.98297	2.54003	20.0818	middle
MIR6300	gma-MIR6300-p5_1ss13CT	GTGGTAAGTATTTCCGCC	up	3.68345	2.89899	37.2458	middle
MIR6300	gma-MIR6300-p5_1ss16CT	ATAGTGGTAAGTATTTCCGCC	up	3.29658	1.63246	16.0403	middle
MIR6300	gma-miR6300_R+7_1	GTCGTTGTAGTATAGTGGTAAGTAT	up	2.96883	6.3637	49.8214	middle
MIR6300	gma-miR6300_R+7_2	GTCGTTGTAGTATAGTGGTGAGTAT	up	2.96883	6.3637	49.8214	middle
MIR6478	ptc-MIR6478-p5_1ss6CT	CCGACTTTAGCTCAGTTGGT	up	1.22093	9.54863	22.2576	middle
MIR6478	ptc-miR6478_1ss21GA	CCGACCTTAGCTCAGTTGGTA	up	2.30764	70.647	349.755	middle
MIR6478	ptc-miR6478_R-1_1ss20TA	CCGACCTTAGCTCAGTTGGA	up	2.24937	2.46846	11.7369	middle
MIR6478	ptc-miR6478_R-1_1ss6CT	CCGACTTTAGCTCAGTTGGT	up	1.22093	9.54863	22.2576	middle
MIR6478	ptc-miR6478_R+2_1ss21GA	CCGACCTTAGCTCAGTTGGTAGA	up	1.96396	142.963	557.747	middle
	PC-3p-12725_949	TTCCCGTCGACTTGATCTCTC	down	-2.28348	32.6796	6.71247	middle
	PC-3p-21315_564	TTCTTGGGCCATTCGAGTAGG	down	-1.97694	58.8509	14.9498	middle
	PC-3p-27183_435	TTTATGATTGCTCCAAAGGTGA	down	-1.6259	44.5236	14.4259	middle
	PC-3p-2995_3874	ACTGTGTTCCCTTGATCAAAT	down	-1.1455	86.5376	39.1177	middle
	PC-3p-3290_3536	CTAGATTCTGGTGCACTGACC	down	-2.02126	155.342	38.2675	middle
	PC-3p-36353_314	ATATTCCATAGCATTTCATGTAGA	down	-3.33598	18.6575	1.84766	middle
	PC-3p-57239_181	AAAGTTCGATTGCACCTGAGTTTT	down	-2.20201	17.0029	3.69531	middle
	PC-5p-19976_605	TTGATAAATGGGAGAGTTTCC	up	1.56262	12.7065	37.5337	middle
	PC-5p-2836_4089	TGTCGCAGGAGAAATAGCACC	up	4.1031	29.0872	499.873	middle
	PC-5p-362_25410	AGGACACGGCGAATCCTCTATT	up	2.91591	251.973	1901.64	high
	PC-5p-46965_232	AACGACAATTGTACTCACGGAAGA	down	-2.72945	17.1552	2.58672	middle
	PC-5p-5063_2348	CTAGGGATGAGATAGAGCATG	up	2.62088	32.6165	200.632	middle
T24hvsT24h_0
family	miR_name	miR_seq	up/down	log2(fold_change)	T24h_0(mean)	T24h(mean)	Expression level
MIR10420	gma-miR10420_L+1R-2	ACCTGAACCATCATTTTT	up	2.08488	120.902	512.913	middle
MIR10420	gma-miR10420_R-1_1ss5AG	CCTGGACCATCATTTTTT	up	1.19849	10.8962	25.0066	middle
MIR10423	gma-MIR10423-p5_1ss3AC	CTCTCAATGAAAGCACCA	up	1.06644	13.1898	27.6229	middle
MIR11096	lja-MIR11096a-p3_2ss11GT21GC	TAATTTTGAATTTTGGGGACC	down	-2.81071	15.5565	2.21719	middle
MIR11096	lja-MIR11096a-p5_2ss11GT21GC	TAATTTTGAATTTTGGGGACC	down	-2.81071	15.5565	2.21719	middle
MIR156	bra-miR156e-3p_L-1_2ss8CT14TA	GCTCACTTCTCTATCTGTCAGT	up	1.49185	155.777	438.123	middle
MIR156	csi-miR156h-5p_2ss15AG20TA	ACAGAAGATAGAGAGCACAAA	down	-2.75787	32.4935	4.80391	middle
MIR156	gma-MIR156u-p3_1ss22CT	GCTCACTTCTCTATCTGTCAGT	up	1.49185	155.777	438.123	middle
MIR159	ath-miR159b-3p_1ss7TA	TTTGGAATGAAGGGAGCTCTT	down	-2.93968	14.1759	1.84766	middle
MIR159	ath-miR159c_2ss3TA20CT	TTAGGATTGAAGGGAGCTCTT	down	-2.92642	33.711	4.43438	middle
MIR166	mtr-miR166e-5p	GGAATGTTGGCTGGCTCGAGG	down	-1.5367	345.516	119.09	middle
MIR166	mtr-miR166e-5p_2ss10GT21GA	GGAATGTTGTCTGGCTCGAGA	up	1.42312	121.072	324.672	middle
MIR171	lja-miR171d-5p	TTGAGCCGCGCCAATATCACT	down	-1.70531	136.869	41.9717	middle
MIR171	gma-miR171k-3p	TTGAGCCGCGCCAATATCACT	down	-1.70531	136.869	41.9717	middle
MIR172	mtr-miR172c-5p	GTAGCATCATCAAGATTCACA	up	1.58078	30.1633	90.228	middle
MIR2111	lja-miR2111-3p_2ss10AC20CT	GTCCTTAGGCTGCAGATTATC	down	-1.09521	21.2907	9.96552	middle
MIR2592	mtr-MIR2592ay-p5_2ss6AG17CG_1	GAGTCGGGTTGTTTGGGA	up	3.30351	1.50482	14.8572	middle
MIR2592	mtr-MIR2592ay-p5_2ss6AG17CG_2	GAGTCGGGTTGTTTGGGAA	up	3.30351	1.50482	14.8572	middle
MIR2592	mtr-MIR2592bj-p5_2ss12TC19AT	ATTCCCACTGTCCCTGTCTA	up	2.78282	5.12434	35.2654	middle
MIR3508	ahy-miR3508	TAGAGGGTCCCCATGTTCTCA	up	2.71071	443.439	2902.94	high
MIR3513	ahy-MIR3513-p3_1ss5AG	TGTTGCATGTGTTGTTGGTTT	down	-1.2229	695.57	297.997	middle
MIR397	mtr-miR397-5p	TCATTGAGTGCAGCGTTGATG	up	2.94249	29.5032	226.801	middle
MIR398	mtr-miR398b	TGTGTTCTCAGGTCGCCCCTG	up	2.85766	39.6127	287.129	middle
MIR408	ahy-miR408-3p_L-1R+1_1	TGCACTGCCTCTTCCCTGGCA	up	3.1123	111.355	962.957	middle
MIR408	ahy-miR408-3p_L-1R+1_2	TGCACTGCCTCTTCCCTGGCT	up	3.1123	111.355	962.957	middle
MIR530	eun-MIR530-p3_2ss3AT17CA	GATGAAGAACGTAGCGAA	up	4.05402	4.87354	80.9519	middle
MIR530	eun-MIR530-p5_2ss3AT17CA	GATGAAGAACGTAGCGAA	up	4.05402	4.87354	80.9519	middle
MIR6300	gma-MIR6300-p3	TAGTGGTAAGTATTCCCGCC	up	2.48062	26.6625	148.813	middle
MIR6300	gma-MIR6300-p3_1ss13CT	GTGGTAAGTATTTCCGCC	up	3.45949	3.38584	37.2458	middle
MIR6300	gma-MIR6300-p3_1ss15CT	TAGTGGTAAGTATTTCCGCC	up	3.27595	3.94214	38.185	middle
MIR6300	gma-MIR6300-p5_1ss12AG	AGTATAGTGGTGAGTATTCCCGCC	up	2.67882	3.13615	20.0818	middle
MIR6300	gma-MIR6300-p5_1ss13CT	GTGGTAAGTATTTCCGCC	up	3.45949	3.38584	37.2458	middle
MIR6300	gma-miR6300_R+5_1	GTCGTTGTAGTATAGTGGTAAGT	up	1.31657	100.895	251.303	middle
MIR6300	gma-miR6300_R+5_2	GTCGTTGTAGTATAGTGGTGAGT	up	1.31657	100.895	251.303	middle
MIR6300	gma-miR6300_R+7_1	GTCGTTGTAGTATAGTGGTAAGTAT	up	3.10567	5.78781	49.8214	middle
MIR6300	gma-miR6300_R+7_2	GTCGTTGTAGTATAGTGGTGAGTAT	up	3.10567	5.78781	49.8214	middle
MIR6478	ptc-miR6478_1ss21GA	CCGACCTTAGCTCAGTTGGTA	up	1.74973	104.002	349.755	middle
MIR6478	ptc-miR6478_R-1_1ss20TA	CCGACCTTAGCTCAGTTGGA	up	1.56072	3.97861	11.7369	middle
MIR6478	ptc-miR6478_R+2_1ss21GA	CCGACCTTAGCTCAGTTGGTAGA	up	1.60494	183.359	557.747	middle
MIR8175	ath-miR8175_L+4	GTTCGATCCCCGGCAACGGCGCCA	up	1.22583	5.41273	12.6598	middle
	PC-3p-12725_949	TTCCCGTCGACTTGATCTCTC	down	-1.87722	24.6594	6.71247	middle
	PC-3p-21315_564	TTCTTGGGCCATTCGAGTAGG	down	-2.34837	76.1317	14.9498	middle
	PC-3p-27183_435	TTTATGATTGCTCCAAAGGTGA	down	-2.02937	58.8903	14.4259	middle
	PC-3p-2995_3874	ACTGTGTTCCCTTGATCAAAT	down	-1.34583	99.4277	39.1177	middle
	PC-3p-31909_365	ATGAAATGGTACTCGATCGCAACA	down	-2.61332	27.1343	4.43438	middle
	PC-3p-36353_314	ATATTCCATAGCATTTCATGTAGA	down	-3.31921	18.4418	1.84766	middle
	PC-3p-77308_120	AAACTCTCCCATTTATCAACC	up	2.96295	1.18331	9.22646	middle
	PC-5p-19976_605	TTGATAAATGGGAGAGTTTCC	up	1.5935	12.4374	37.5337	middle
	PC-5p-2836_4089	TGTCGCAGGAGAAATAGCACC	up	5.1638	13.9445	499.873	middle
	PC-5p-362_25410	AGGACACGGCGAATCCTCTATT	up	3.07985	224.907	1901.64	high
T8hvsT24h
family	miR_name	miR_seq	up/down	log2(fold_change)	T8h(mean)	T24h(mean)	Expression level
MIR10420	gma-miR10420_L+1R-2	ACCTGAACCATCATTTTT	up	1.44596	188.264	512.913	middle
MIR11096	lja-MIR11096a-p3_2ss11GT21GC	TAATTTTGAATTTTGGGGACC	down	-2.8341	15.8108	2.21719	middle
MIR11096	lja-MIR11096a-p5_2ss11GT21GC	TAATTTTGAATTTTGGGGACC	down	-2.8341	15.8108	2.21719	middle
MIR156	csi-miR156h-5p_2ss15AG20TA	ACAGAAGATAGAGAGCACAAA	down	-3.79439	66.6529	4.80391	middle
MIR166	mtr-miR166e-5p_2ss10GT21GA	GGAATGTTGTCTGGCTCGAGA	up	1.77469	94.8876	324.672	middle
MIR172	mtr-miR172c-5p_L-1R+1	TAGCATCATCAAGATTCACAT	up	1.10121	40.7787	87.4843	middle
MIR2592	mtr-MIR2592bj-p5_2ss12TC19AT	ATTCCCACTGTCCCTGTCTA	up	2.82315	4.98305	35.2654	middle
MIR3508	ahy-miR3508	TAGAGGGTCCCCATGTTCTCA	up	1.86384	797.567	2902.94	high
MIR397	mtr-miR397-5p	TCATTGAGTGCAGCGTTGATG	up	1.50286	80.0275	226.801	middle
MIR398	mtr-miR398b	TGTGTTCTCAGGTCGCCCCTG	up	1.86842	78.6367	287.129	middle
MIR408	ahy-miR408-3p_L-1R+1_1	TGCACTGCCTCTTCCCTGGCA	up	1.22134	412.996	962.957	middle
MIR408	ahy-miR408-3p_L-1R+1_2	TGCACTGCCTCTTCCCTGGCT	up	1.22134	412.996	962.957	middle
MIR530	eun-MIR530-p3_2ss3AT17CA	GATGAAGAACGTAGCGAA	up	2.88152	10.985	80.9519	middle
MIR530	eun-MIR530-p5_2ss3AT17CA	GATGAAGAACGTAGCGAA	up	2.88152	10.985	80.9519	middle
MIR6300	gma-MIR6300-p3	TAGTGGTAAGTATTCCCGCC	up	2.10654	34.555	148.813	middle
MIR6300	gma-MIR6300-p3_1ss13CT	GTGGTAAGTATTTCCGCC	up	2.43693	6.87839	37.2458	middle
MIR6300	gma-MIR6300-p3_1ss15CT	TAGTGGTAAGTATTTCCGCC	up	2.05001	9.22103	38.185	middle
MIR6300	gma-MIR6300-p5_1ss13CT	GTGGTAAGTATTTCCGCC	up	2.43693	6.87839	37.2458	middle
MIR6300	gma-MIR6300-p5_1ss16CT	ATAGTGGTAAGTATTTCCGCC	up	2.16157	3.58522	16.0403	middle
MIR6300	gma-MIR6300-p5_1ss18CT	GTATAGTGGTAAGTATTTCCGCC	up	2.91719	2.69712	20.3733	middle
MIR6478	ptc-miR6478_1ss21GA	CCGACCTTAGCTCAGTTGGTA	up	1.69673	107.894	349.755	middle
MIR6478	ptc-miR6478_R+2_1ss21GA	CCGACCTTAGCTCAGTTGGTAGA	up	1.23067	237.667	557.747	middle
	PC-3p-21315_564	TTCTTGGGCCATTCGAGTAGG	down	-2.09185	63.73	14.9498	middle
	PC-3p-24641_483	AGAGAGATGCATGCTTTGAAAGTT	down	-2.37652	46.054	8.86875	middle
	PC-3p-27183_435	TTTATGATTGCTCCAAAGGTGA	down	-1.78806	49.8201	14.4259	middle
	PC-5p-2836_4089	TGTCGCAGGAGAAATAGCACC	up	2.52727	86.7114	499.873	middle
	PC-5p-362_25410	AGGACACGGCGAATCCTCTATT	up	1.49197	676.086	1901.64	high
S0hvsS8h
family	miR_name	miR_seq	up/down	log2(fold_change)	S0h(mean)	S8h(mean)	Expression level
MIR160	ahy-miR160-3p	GCATGAAGGGAGTCACGCAGG	up	1.88903	24.1298	89.3736	middle
MIR160	ahy-miR160-5p	TGCCTGGCTCCCTGAATGCCA	up	1.23515	31.5124	74.182	middle
MIR167	ahy-miR167-3p_L-1	GATCATGTGGCAGTTTCACC	up	1.59789	114.603	346.903	middle
MIR171	lja-miR171d-5p	TTGAGCCGCGCCAATATCACT	down	-1.37644	123.958	47.7445	middle
MIR171	gma-miR171k-3p	TTGAGCCGCGCCAATATCACT	down	-1.37644	123.958	47.7445	middle
MIR172	mtr-miR172b_L+1R-1	GAGAATCTTGATGATGCTGCA	up	1.79337	3.06208	10.6139	middle
MIR172	gma-miR172g_R+1_1ss9AT	GCAGCACCTTCAAGATTCACA	up	1.52401	16.6245	47.8105	middle
MIR172	gma-miR172h-5p_2ss7GC9AT	GCAGCACCTTCAAGATTCACA	up	1.52401	16.6245	47.8105	middle
MIR6300	gma-miR6300_L+2	AAGTCGTTGTAGTATAGTGG	up	2.29348	0.635806	3.11696	middle
	PC-3p-28359_415	GTTAATGATCACCATGGCTGA	down	-1.30615	29.8621	12.0762	middle
	PC-3p-46954_232	AAAGTTGACTGCACCTGAGTTTCT	up	1.95235	3.06208	11.8504	middle
	PC-5p-19976_605	TTGATAAATGGGAGAGTTTCC	up	1.2057	10.6463	24.5556	middle
	PC-5p-85555_103	AGTGTAGTCGACTTTATGTGAAGT	down	-2.91662	6.19385	0.820297	middle
S8h_0vsS8h
family	miR_name	miR_seq	up/down	log2(fold_change)	S8h_0(mean)	S8h(mean)	Expression level
MIR10420	gma-miR10420_R-1_1ss2CT	CTTGAACCATCATTTTTT	up	1.17091	3.65482	8.22898	middle
MIR172	mtr-miR172b_L+1R-1	GAGAATCTTGATGATGCTGCA	up	1.11128	4.913	10.6139	middle
MIR2916	peu-MIR2916-p5_1ss5AG	TACCGTCCTAGTCTCAACCATA	up	1.30886	1895.51	4696.06	high
MIR6300	gma-miR6300_L-1R+1_1	TCGTTGTAGTATAGTGGC	up	1.03473	22.352	45.7932	middle
MIR6300	gma-miR6300_L-1R+1_2	TCGTTGTAGTATAGTGGT	up	1.03473	22.352	45.7932	middle
MIR9410	bol-MIR9410-p3_2ss5TG18TA_1	CTTTGCAGACGACTTAAA	up	1.33305	2.17443	5.47813	middle
MIR9410	bol-MIR9410-p3_2ss5TG18TA_2	CTTTGCAGACGACTTAAAT	up	1.33305	2.17443	5.47813	middle
MIR9410	bol-MIR9410-p3_2ss5TG18TA_3	CTTTGCAGACGACTTAAATA	up	1.33305	2.17443	5.47813	middle
MIR9410	bol-MIR9410-p5_2ss5TG18TA_1	CTTTGCAGACGACTTAAA	up	1.33305	2.17443	5.47813	middle
MIR9410	bol-MIR9410-p5_2ss5TG18TA_2	CTTTGCAGACGACTTAAAT	up	1.33305	2.17443	5.47813	middle
MIR9410	bol-MIR9410-p5_2ss5TG18TA_3	CTTTGCAGACGACTTAAATA	up	1.33305	2.17443	5.47813	middle
S0hvsS24h
family	miR_name	miR_seq	up/down	log2(fold_change)	S0h(mean)	S24h(mean)	Expression level
MIR10420	gma-miR10420_L+1R-2	ACCTGAACCATCATTTTT	up	1.92938	146.152	556.68	middle
MIR11096	lja-MIR11096a-p3_2ss11GT21GC	TAATTTTGAATTTTGGGGACC	down	-1.17093	15.9472	7.08268	middle
MIR11096	lja-MIR11096a-p5_2ss11GT21GC	TAATTTTGAATTTTGGGGACC	down	-1.17093	15.9472	7.08268	middle
MIR1507	mtr-miR1507-5p_R-1_2ss5TA18AG	AGAGATGTATGGAACGAGAGA	down	-1.03918	875.617	426.08	middle
MIR1511	lja-miR1511-3p_R-3_1ss20GA	AACCAGGCTCTGATACCATAA	up	2.42013	7.40007	39.6065	middle
MIR1511	gma-miR1511_1ss20GA	AACCAGGCTCTGATACCATA	up	3.60168	0.986064	11.9707	middle
MIR156	nta-miR156a_1ss19AT	TGACAGAAGAGAGTGAGCTC	up	2.06887	3.83298	16.0815	middle
MIR156	ahy-miR156b-5p_1ss10GT	TTGACAGAATATAGAGAGCAC	down	-2.6939	20.2467	3.12902	middle
MIR156	mtr-miR156b-5p_R+2	TGACAGAAGAGAGTGAGCACTT	down	-1.61573	17.8302	5.818	middle
MIR156	csi-miR156h-5p_2ss15AG20TA	ACAGAAGATAGAGAGCACAAA	down	-1.30781	74.4343	30.0665	middle
MIR159	mtr-miR159a_1ss21AC	TTTGGATTGAAGGGAGCTCTC	up	1.14529	215.067	475.708	middle
MIR159	ath-miR159c	TTTGGATTGAAGGGAGCTCCT	up	1.47809	29.6978	82.7322	middle
MIR160	ahy-miR160-5p	TGCCTGGCTCCCTGAATGCCA	up	3.13427	31.5124	276.688	middle
MIR164	mtr-miR164a_1ss21AC	TGGAGAAGCAGGGCACGTGCC	up	1.24904	12.7747	30.3633	middle
MIR166	mtr-miR166a_R+1	TCGGACCAGGCTTCATTCCCCA	up	1.07855	66.3374	140.099	middle
MIR166	mtr-miR166e-5p_2ss10GT11CT	GGAATGTTGTTTGGCTCGAGG	down	-1.1811	2301.76	1015.11	high
MIR166	mtr-miR166e-5p_2ss10GT21GA	GGAATGTTGTCTGGCTCGAGA	up	1.98809	137.703	546.284	middle
MIR166	mtr-miR166e-5p_2ss8TC10GT	GGAATGTCGTCTGGCTCGAGG	down	-2.38585	156.465	29.9367	middle
MIR166	mtr-miR166g-5p_1ss11CT	GGAATGTTGTTTGGCTCGAGG	down	-1.1811	2301.76	1015.11	high
MIR167	ahy-miR167-3p_L-1	GATCATGTGGCAGTTTCACC	up	1.2378	114.603	270.277	middle
MIR167	mtr-miR167b-5p_R+1	TGAAGCTGCCAGCATGATCTGG	down	-1.1548	131.32	58.9792	middle
MIR167	csi-miR167c-3p_1ss10TA	AGGTCATCTAGCAGCTTCAAT	down	-1.27293	265.941	110.051	middle
MIR167	gma-miR167c_R+1	TGAAGCTGCCAGCATGATCTGA	up	1.32411	16.2327	40.6433	middle
MIR171	lja-miR171d-5p	TTGAGCCGCGCCAATATCACT	down	-1.9616	123.958	31.8254	middle
MIR171	gma-miR171k-3p	TTGAGCCGCGCCAATATCACT	down	-1.9616	123.958	31.8254	middle
MIR171	ptc-MIR171m-p5_1ss17CT	CGTGGTATTGATCCGGTTCATC	up	1.01718	393.269	795.961	middle
MIR171	gma-miR171n	TTGAGCCGCGTCAATATCTTA	down	-1.21574	74.8408	32.2228	middle
MIR172	gma-miR172g_R+1_1ss9AT	GCAGCACCTTCAAGATTCACA	up	1.99554	16.6245	66.2931	middle
MIR172	gma-miR172h-5p_2ss7GC9AT	GCAGCACCTTCAAGATTCACA	up	1.99554	16.6245	66.2931	middle
MIR2592	mtr-MIR2592bj-p5_2ss12TC19AT	ATTCCCACTGTCCCTGTCTA	up	2.14973	6.51222	28.8976	middle
MIR2603	mtr-MIR2603-p3_2ss9AC17AC	GTCCCTGCCCTTTGTACA	up	3.84869	4.86469	70.0852	middle
MIR2916	peu-MIR2916-p3_2ss18TC19GA	CGATGCCGACCAGGGATCAGCGGA	up	1.9474	3125.35	12053.9	high
MIR2916	peu-MIR2916-p5_1ss5AG	TACCGTCCTAGTCTCAACCATA	up	2.98447	2752.82	21786.8	high
MIR3508	ahy-miR3508	TAGAGGGTCCCCATGTTCTCA	up	3.13006	259.611	2272.83	high
MIR3510	ahy-MIR3510-p5_1ss22GT	CCATCTTGCGAGACTGAACGAT	down	-1.09904	31.0281	14.4847	middle
MIR3513	ahy-MIR3513-p5	TGAACTTCTGTTGATTGTGTT	down	-1.12364	132.645	60.8754	middle
MIR3518	ahy-miR3518	TGACCTTTGGGGATATTCGTG	up	2.80774	3.12088	21.852	middle
MIR3630	vvi-miR3630-3p_L-1_2ss2TA21AG	ATGGGAATCTCTCTGATGCGC	up	3.77913	1.18328	16.2449	middle
MIR3630	vvi-miR3630-3p_L-2_1ss21AG	TGGGAATCTCTCTGATGCGC	up	2.89533	3.35262	24.9439	middle
MIR3630	vvi-MIR3630-p5_2ss1TA20AG	ATGGGAATCTCTCTGATGCG	up	2.39596	1.18078	6.21478	middle
MIR390	mtr-miR390_1ss21CA	AAGCTCAGGAGGGATAGCGCA	up	1.19631	98.6144	225.977	middle
MIR396	gma-miR396a-5p_1ss21GA	TTCCACAGCTTTCTTGAACTA	up	2.5801	17.8778	106.906	middle
MIR408	ahy-miR408-3p_L-1R+1_1	TGCACTGCCTCTTCCCTGGCA	up	2.71657	120.097	789.411	middle
MIR408	ahy-miR408-3p_L-1R+1_2	TGCACTGCCTCTTCCCTGGCT	up	2.71657	120.097	789.411	middle
MIR5368	gma-MIR5368-p3_2ss2AT19CA	GTGAGATACCACTCTGGAAGAGCT	up	2.9354	26.8917	205.713	middle
MIR6300	gma-MIR6300-p3	TAGTGGTAAGTATTCCCGCC	up	3.79752	8.85117	123.075	middle
MIR6300	gma-MIR6300-p3_1ss13CT	GTGGTAAGTATTTCCGCC	up	3.76032	3.0481	41.3047	middle
MIR6300	gma-MIR6300-p3_1ss15CT	TAGTGGTAAGTATTTCCGCC	up	5.43311	0.694837	30.0202	middle
MIR6300	gma-MIR6300-p5_1ss13AG	TAGTATAGTGGTGAGTATTCCCGCC	up	3.63619	1.08995	13.5522	middle
MIR6300	gma-MIR6300-p5_1ss13CT	GTGGTAAGTATTTCCGCC	up	3.76032	3.0481	41.3047	middle
MIR6300	gma-miR6300_1ss18GA	GTCGTTGTAGTATAGTGA	up	3.92274	7.88851	119.635	middle
MIR6300	gma-miR6300_1ss18GT	GTCGTTGTAGTATAGTGT	up	3.23365	5.91638	55.6523	middle
MIR6300	gma-miR6300_L-1R+1_1	TCGTTGTAGTATAGTGGC	up	2.1165	31.8405	138.073	middle
MIR6300	gma-miR6300_L-1R+1_2	TCGTTGTAGTATAGTGGT	up	2.1165	31.8405	138.073	middle
MIR6300	gma-miR6300_L+2	AAGTCGTTGTAGTATAGTGG	up	3.73568	0.635806	8.46985	middle
MIR6300	gma-miR6300_R+3	GTCGTTGTAGTATAGTGGTGA	up	2.03993	9.39467	38.6333	middle
MIR6300	gma-miR6300_R+4	GTCGTTGTAGTATAGTGGTGAG	up	1.21446	12.8894	29.9105	middle
MIR6300	gma-miR6300_R+7_1	GTCGTTGTAGTATAGTGGTAAGTAT	up	1.38771	8.5797	22.4499	middle
MIR6300	gma-miR6300_R+7_2	GTCGTTGTAGTATAGTGGTGAGTAT	up	1.38771	8.5797	22.4499	middle
MIR6478	ptc-miR6478_2ss20TC21GA	CCGACCTTAGCTCAGTTGGCA	up	2.9613	4.94338	38.5004	middle
MIR6478	ptc-miR6478_R+2_1ss21GA	CCGACCTTAGCTCAGTTGGTAGA	up	1.29878	191.02	469.948	middle
MIR9410	bol-MIR9410-p3_2ss5TG18TA_1	CTTTGCAGACGACTTAAA	up	2.00547	4.49592	18.052	middle
MIR9410	bol-MIR9410-p3_2ss5TG18TA_2	CTTTGCAGACGACTTAAAT	up	2.00547	4.49592	18.052	middle
MIR9410	bol-MIR9410-p3_2ss5TG18TA_3	CTTTGCAGACGACTTAAATA	up	2.00547	4.49592	18.052	middle
MIR9410	bol-MIR9410-p5_2ss4TG17TA	TTTGCAGACGACTTAAATA	up	1.58852	2.88564	8.6783	middle
MIR9410	bol-MIR9410-p5_2ss5TG18TA_1	CTTTGCAGACGACTTAAA	up	2.00547	4.49592	18.052	middle
MIR9410	bol-MIR9410-p5_2ss5TG18TA_2	CTTTGCAGACGACTTAAAT	up	2.00547	4.49592	18.052	middle
MIR9410	bol-MIR9410-p5_2ss5TG18TA_3	CTTTGCAGACGACTTAAATA	up	2.00547	4.49592	18.052	middle
	PC-3p-26143_454	AGAGAACTTGATTACATTCGTAAT	up	4.18586	8.78498	159.886	middle
	PC-3p-36353_314	ATATTCCATAGCATTTCATGTAGA	down	-1.42775	26.7409	9.93986	middle
	PC-3p-42652_261	TGATAATCGTTGTTTTAGACC	down	-2.22519	13.935	2.98028	middle
	PC-3p-6886_1744	ATCAAGATGGTAAATGTTATTAGA	up	1.89425	35.0507	130.293	middle
	PC-5p-19976_605	TTGATAAATGGGAGAGTTTCC	up	1.50207	10.6463	30.1555	middle
	PC-5p-2836_4089	TGTCGCAGGAGAAATAGCACC	up	7.80034	3.46957	773.411	middle
	PC-5p-362_25410	AGGACACGGCGAATCCTCTATT	up	3.48995	161.081	1809.77	high
	PC-5p-42120_265	TAAGCGTCTTTATCTGAGTGGCCT	down	-1.64466	10.0275	3.20703	middle
	PC-5p-5063_2348	CTAGGGATGAGATAGAGCATG	up	3.10268	27.1781	233.464	middle
S24h_0vsS24h
family	miR_name	miR_seq	up/down	log2(fold_change)	S24h_0(mean)	S24h(mean)	Expression level
MIR10420	gma-miR10420_L+1R-2	ACCTGAACCATCATTTTT	up	2.21019	120.302	556.68	middle
MIR11096	lja-MIR11096a-p3_2ss11GT21GC	TAATTTTGAATTTTGGGGACC	down	-1.32515	17.7463	7.08268	middle
MIR11096	lja-MIR11096a-p5_2ss11GT21GC	TAATTTTGAATTTTGGGGACC	down	-1.32515	17.7463	7.08268	middle
MIR156	ath-MIR156a-p3_1ss9GA	TGCTCACTACTCTTTCTGTCAGA	up	2.7652	1.78385	12.1273	middle
MIR156	nta-miR156a_1ss19AT	TGACAGAAGAGAGTGAGCTC	up	1.10687	7.46664	16.0815	middle
MIR156	ahy-miR156b-5p_1ss10GT	TTGACAGAATATAGAGAGCAC	down	-2.63769	19.4729	3.12902	middle
MIR160	ahy-miR160-5p	TGCCTGGCTCCCTGAATGCCA	up	1.99841	69.2484	276.688	middle
MIR167	mtr-miR167b-5p_R+1	TGAAGCTGCCAGCATGATCTGG	down	-1.0484	121.983	58.9792	middle
MIR167	gma-miR167c_R+1	TGAAGCTGCCAGCATGATCTGA	up	1.53803	13.9958	40.6433	middle
MIR172	mtr-miR172d-3p_R+1_1ss9GT	AGAATCTTTATGATGCTGCAG	down	-2.37124	17.1289	3.31066	middle
MIR2592	mtr-MIR2592bj-p3_2ss11TC18AT	TTCCCACTGTCCCTGTCT	up	2.6192	2.08115	12.7868	middle
MIR2592	mtr-MIR2592bj-p5_2ss12TC19AT	ATTCCCACTGTCCCTGTCTA	up	2.69596	4.45961	28.8976	middle
MIR2603	mtr-MIR2603-p3_2ss9AC17AC	GTCCCTGCCCTTTGTACA	up	3.15522	7.86701	70.0852	middle
MIR2916	peu-MIR2916-p3_2ss18TC19GA	CGATGCCGACCAGGGATCAGCGGA	up	2.26911	2500.67	12053.9	high
MIR2916	peu-MIR2916-p5_1ss5AG	TACCGTCCTAGTCTCAACCATA	up	2.98433	2753.08	21786.8	high
MIR3513	ahy-MIR3513-p5	TGAACTTCTGTTGATTGTGTT	down	-1.41311	162.118	60.8754	middle
MIR3630	vvi-miR3630-3p_L-1_2ss2TA21AG	ATGGGAATCTCTCTGATGCGC	up	4.44996	0.743269	16.2449	middle
MIR3630	vvi-miR3630-3p_L-2_1ss21AG	TGGGAATCTCTCTGATGCGC	up	2.4329	4.61943	24.9439	middle
MIR6300	gma-MIR6300-p3	TAGTGGTAAGTATTCCCGCC	up	2.65406	19.5532	123.075	middle
MIR6300	gma-MIR6300-p3_1ss15CT	TAGTGGTAAGTATTTCCGCC	up	2.79985	4.31096	30.0202	middle
MIR6300	gma-MIR6300-p5_1ss16CT	ATAGTGGTAAGTATTTCCGCC	up	3.18487	2.52711	22.9808	middle
MIR6300	gma-MIR6300-p5_1ss18CT	GTATAGTGGTAAGTATTTCCGCC	up	2.71295	2.37846	15.5946	middle
MIR6300	gma-miR6300_1ss18GA	GTCGTTGTAGTATAGTGA	up	3.86117	8.23247	119.635	middle
MIR6300	gma-miR6300_1ss18GT	GTCGTTGTAGTATAGTGT	up	3.75704	4.11624	55.6523	middle
MIR6300	gma-miR6300_R+7_1	GTCGTTGTAGTATAGTGGTAAGTAT	up	1.75921	6.63195	22.4499	middle
MIR6300	gma-miR6300_R+7_2	GTCGTTGTAGTATAGTGGTGAGTAT	up	1.75921	6.63195	22.4499	middle
MIR6478	ptc-miR6478_1ss21GA	CCGACCTTAGCTCAGTTGGTA	up	1.43139	100.176	270.182	middle
MIR6478	ptc-miR6478_R+2_1ss21GA	CCGACCTTAGCTCAGTTGGTAGA	up	1.41797	175.872	469.948	middle
MIR9410	bol-MIR9410-p3_2ss5TG18TA_1	CTTTGCAGACGACTTAAA	up	2.51082	3.16732	18.052	middle
MIR9410	bol-MIR9410-p3_2ss5TG18TA_2	CTTTGCAGACGACTTAAAT	up	2.51082	3.16732	18.052	middle
MIR9410	bol-MIR9410-p3_2ss5TG18TA_3	CTTTGCAGACGACTTAAATA	up	2.51082	3.16732	18.052	middle
MIR9410	bol-MIR9410-p5_2ss5TG18TA_1	CTTTGCAGACGACTTAAA	up	2.51082	3.16732	18.052	middle
MIR9410	bol-MIR9410-p5_2ss5TG18TA_2	CTTTGCAGACGACTTAAAT	up	2.51082	3.16732	18.052	middle
MIR9410	bol-MIR9410-p5_2ss5TG18TA_3	CTTTGCAGACGACTTAAATA	up	2.51082	3.16732	18.052	middle
	PC-3p-26143_454	AGAGAACTTGATTACATTCGTAAT	up	2.51513	27.9692	159.886	middle
	PC-3p-34949_329	ATCATATAGTAACACGTGTCAGCC	down	-2.43712	12.8065	2.36476	middle
	PC-3p-37852_299	AGAGTTGACTGCACCTGAGTTTTT	down	-2.45444	22.8689	4.1724	middle
	PC-3p-5339_2232	CTGGAGGCCTTTGAAGGAGAC	up	1.67458	18.8325	60.1184	middle
	PC-3p-6886_1744	ATCAAGATGGTAAATGTTATTAGA	up	1.1043	60.6028	130.293	middle
	PC-5p-19976_605	TTGATAAATGGGAGAGTTTCC	up	1.6748	9.44497	30.1555	middle
	PC-5p-2836_4089	TGTCGCAGGAGAAATAGCACC	up	5.95275	12.4869	773.411	middle
	PC-5p-30369_386	TGAAAGTTAGTAGTTGGTACC	down	-2.09568	22.8461	5.34504	middle
	PC-5p-5063_2348	CTAGGGATGAGATAGAGCATG	up	2.20831	50.5188	233.464	middle
S8hvsS24h
family	miR_name	miR_seq	up/down	log2(fold_change)	S8h(mean)	S24h(mean)	Expression level
MIR10420	gma-miR10420_L+1R-2	ACCTGAACCATCATTTTT	up	1.44741	204.123	556.68	middle
MIR11096	lja-MIR11096a-p3_2ss11GT21GC	TAATTTTGAATTTTGGGGACC	down	-1.00768	14.241	7.08268	middle
MIR11096	lja-MIR11096a-p5_2ss11GT21GC	TAATTTTGAATTTTGGGGACC	down	-1.00768	14.241	7.08268	middle
MIR1515	csi-miR1515a_R-1	TCATTTTTGCGTGCAATGATC	down	-1.11577	43.6761	20.1541	middle
MIR156	nta-miR156a_1ss19AT	TGACAGAAGAGAGTGAGCTC	up	1.77079	4.71267	16.0815	middle
MIR156	ahy-miR156b-5p_1ss21CT	TTGACAGAAGATAGAGAGCAT	up	1.10464	16.8102	36.1497	middle
MIR156	mtr-miR156b-5p_R+2	TGACAGAAGAGAGTGAGCACTT	down	-1.51375	16.6134	5.818	middle
MIR164	mtr-miR164a_1ss21AC	TGGAGAAGCAGGGCACGTGCC	up	1.12941	13.8792	30.3633	middle
MIR164	mtr-miR164a_1ss21AT	TGGAGAAGCAGGGCACGTGCT	up	1.25424	44.5925	106.372	middle
MIR2592	mtr-MIR2592bj-p3_2ss11TC18AT	TTCCCACTGTCCCTGTCT	up	2.69933	1.96871	12.7868	middle
MIR2592	mtr-MIR2592bj-p5_2ss12TC19AT	ATTCCCACTGTCCCTGTCTA	up	1.82727	8.14328	28.8976	middle
MIR2603	mtr-MIR2603-p3_2ss9AC17AC	GTCCCTGCCCTTTGTACA	up	3.2181	7.53149	70.0852	middle
MIR2916	peu-MIR2916-p3_2ss18TC19GA	CGATGCCGACCAGGGATCAGCGGA	up	1.65496	3827.67	12053.9	high
MIR2916	peu-MIR2916-p5_1ss5AG	TACCGTCCTAGTCTCAACCATA	up	2.21393	4696.06	21786.8	high
MIR3630	vvi-miR3630-3p_L-1_2ss2TA21AG	ATGGGAATCTCTCTGATGCGC	up	1.54745	5.55761	16.2449	middle
MIR3630	vvi-miR3630-3p_L-2_1ss21AG	TGGGAATCTCTCTGATGCGC	up	1.49254	8.86475	24.9439	middle
MIR395	gma-miR395d_1ss21TC	TGAAGTGTTTGGGGGAACTTC	down	-1.04307	14.1412	6.86266	middle
MIR396	gma-miR396a-5p_1ss21GA	TTCCACAGCTTTCTTGAACTA	up	1.92467	28.1589	106.906	middle
MIR5368	gma-MIR5368-p3_2ss2AT19CA	GTGAGATACCACTCTGGAAGAGCT	up	2.30871	41.5213	205.713	middle
MIR6300	gma-MIR6300-p3	TAGTGGTAAGTATTCCCGCC	up	1.75195	36.5409	123.075	middle
MIR6300	gma-MIR6300-p3_1ss15CT	TAGTGGTAAGTATTTCCGCC	up	1.56987	10.112	30.0202	middle
MIR6300	gma-MIR6300-p5_1ss16CT	ATAGTGGTAAGTATTTCCGCC	up	2.90733	3.06318	22.9808	middle
MIR6300	gma-miR6300_1ss18GA	GTCGTTGTAGTATAGTGA	up	3.6174	9.7479	119.635	middle
MIR6300	gma-miR6300_1ss18GT	GTCGTTGTAGTATAGTGT	up	2.9261	7.32215	55.6523	middle
MIR6300	gma-miR6300_L+2	AAGTCGTTGTAGTATAGTGG	up	1.4422	3.11696	8.46985	middle
MIR6478	ptc-MIR6478-p5_1ss6CT	CCGACTTTAGCTCAGTTGGT	up	1.63521	10.0665	31.2696	middle
MIR6478	ptc-miR6478_R-1_1ss6CT	CCGACTTTAGCTCAGTTGGT	up	1.63521	10.0665	31.2696	middle
MIR6478	ptc-miR6478_R-2_1ss6CT	CCGACTTTAGCTCAGTTGG	up	2.54093	3.51588	20.4612	middle
MIR6478	ptc-miR6478_R+2_1ss21GA	CCGACCTTAGCTCAGTTGGTAGA	up	1.30376	190.361	469.948	middle
MIR9410	bol-MIR9410-p3_2ss5TG18TA_1	CTTTGCAGACGACTTAAA	up	1.7204	5.47813	18.052	middle
MIR9410	bol-MIR9410-p3_2ss5TG18TA_2	CTTTGCAGACGACTTAAAT	up	1.7204	5.47813	18.052	middle
MIR9410	bol-MIR9410-p3_2ss5TG18TA_3	CTTTGCAGACGACTTAAATA	up	1.7204	5.47813	18.052	middle
MIR9410	bol-MIR9410-p5_2ss5TG18TA_1	CTTTGCAGACGACTTAAA	up	1.7204	5.47813	18.052	middle
MIR9410	bol-MIR9410-p5_2ss5TG18TA_2	CTTTGCAGACGACTTAAAT	up	1.7204	5.47813	18.052	middle
MIR9410	bol-MIR9410-p5_2ss5TG18TA_3	CTTTGCAGACGACTTAAATA	up	1.7204	5.47813	18.052	middle
	PC-3p-177416_31	CAAAAGACAATAAGGCTTCTTC	up	2.99629	2.2148	17.6729	middle
	PC-3p-26143_454	AGAGAACTTGATTACATTCGTAAT	up	2.84267	22.2885	159.886	middle
	PC-3p-3290_3536	CTAGATTCTGGTGCACTGACC	down	-1.56867	91.8442	30.9625	middle
	PC-3p-34949_329	ATCATATAGTAACACGTGTCAGCC	down	-2.87771	17.3806	2.36476	middle
	PC-3p-46954_232	AAAGTTGACTGCACCTGAGTTTCT	down	-2.32517	11.8504	2.36476	middle
	PC-5p-2836_4089	TGTCGCAGGAGAAATAGCACC	up	3.5838	64.5027	773.411	middle
	PC-5p-362_25410	AGGACACGGCGAATCCTCTATT	up	1.8664	496.342	1809.77	high
	PC-5p-5063_2348	CTAGGGATGAGATAGAGCATG	up	1.49059	83.0824	233.464	middle
	PC-5p-85555_103	AGTGTAGTCGACTTTATGTGAAGT	up	3.66312	0.820297	10.3915	middle
