# Supplementary material for: Integration of Small RNA and Degradome Sequencing Reveals the Regulatory Network of Al-Induced Programmed Cell Death in Peanut
Source: Int J Mol Sci. 2021 Dec 27;23(1):246. doi: 10.3390/ijms23010246 (PMC8745729; doi:10.3390/ijms23010246)
Supplement: Supplementary file 1 [file ijms-23-00246-s001.zip › Table S4 Overview of degradome sequences.xlsx]

## Sheet: Sheet1
Table S4 Overview of degradome sequences
Sample	S0h(number)	S0h(ratio)	S8h(number)	S8h(ratio)	S24h(number)	S24h(ratio)	T0h(number)	T0h(ratio)	T8h(number)	T8h(ratio)	T24h(number)	T24h(ratio)
Raw Reads	14018835	/	13370939	/	15461770	/	10839565	/	13085073	/	12882693	/
Unique Raw Reads	5619429	/	5259302	/	6711238	/	4409759	/	5643257	/	6229840	/
reads < 15nt after removing 3 adaptor	96442	0.69%	90959	0.68%	107991	0.70%	75226	0.69%	97446	0.74%	95846	0.74%
Mappable Reads	13922393	99.31%	13279980	99.32%	15353779	99.30%	10764339	99.31%	12987627	99.26%	12786847	99.26%
Unique reads < 15nt after removing 3 adaptor	42354	0.75%	40135	0.76%	49110	0.73%	33937	0.77%	43022	0.76%	45233	0.73%
Unique Mappable Reads	5577075	99.25%	5219167	99.24%	6662128	99.27%	4375822	99.23%	5600235	99.24%	6184607	99.27%
Mapped Reads	10049748	71.69%	9915998	74.16%	10647631	68.86%	8050261	74.27%	9373314	71.63%	8530935	66.22%
Unique Mapped Reads	3685479	65.58%	3483395	66.23%	4131650	61.56%	2947185	66.83%	3653903	64.75%	3734996	59.95%
Number of input Transcript	67110	/	67110	/	67110	/	67110	/	67110	/	67110	/
Number of Coverd Transcript	56198	83.74%	56194	83.73%	57039	84.99%	55502	82.70%	56539	84.25%	56744	84.55%
