# Supplementary material for: Integration of Small RNA and Degradome Sequencing Reveals the Regulatory Network of Al-Induced Programmed Cell Death in Peanut
Source: Int J Mol Sci. 2021 Dec 27;23(1):246. doi: 10.3390/ijms23010246 (PMC8745729; doi:10.3390/ijms23010246)
Supplement: Supplementary file 1 [file ijms-23-00246-s001.zip › Table S5-1 The predicted targets of known and novel miRNAs in T0hvsT8hvsT24h.xlsx]

## Sheet: R0hvsR8hvsR24h
Table S5-1 The predicted targets of known and novel miRNAs in T0hvsT8hvsT24h
Item	Description
TStart	Start position of mRNA and miRNA alignment region
TStop	End position of mRNA and miRNA alignment region
TSlice	Degradation site
AllenScore	Penalty score of mismatched bases between the miRNA and its target (the lower the value, the better)
Paired	Paired position (format is miRNA (5 '- 3'), mRNA (3 '- 5'), " ;" for segmentation.)
Unpaired	Unpaired position
Structure	Secondary structure
DegradomeCategory	Category 0:over one raw read at the position, abundance at the position is equal to the maximum on the transcript, and there is only one maximum on the transcript
	Category 1:over one raw read at the position, abundance at the position is equal to the maximum on the transcript, and there is more than one maximum position on the transcript
	Category 2:over one raw read at the position, abundance at position is less than the maximum but higher than the median for the transcript
	Category 3:over one raw read at the position, abundance at the position is equal to or less than the median for the transcript
	Category 4:only one raw read at the position
Query	Transcript	TStart	TStop	TSlice	MFEperfect	MFEsite	MFEratio	AllenScore	Paired	Unpaired	Structure	Sequence	DegradomeRawReads(R0h)	DegradomeNormReads(R0h)	DegradomeCategory(R0h)	DegradomePval(R0h)	Tplot_file_path(R0h)	DegradomeRawReads(R8h)	DegradomeNormReads(R8h)	DegradomeCategory(R8h)	DegradomePval(R8h)	Tplot_file_path(R8h)	DegradomeRawReads(R24h)	DegradomeNormReads(R24h)	DegradomeCategory(R24h)	DegradomePval(R24h)	Tplot_file_path(R24h)	T0h	T8h	T24h	pvalue	qvalue	significant	GO	KEGG
PC-3p-100264_81	BGI_novel_T006108	274	296	289	-52.3	-35.4	0.676864	9.5	1-7,296-290;10-14,289-285;15-23,283-275	8-9,x-x[BULq];x-x,284-284[BULt];24-24,274-274[UP3]	.(((((((((.(((((--(((((((&)))))))..)))))-))))))))).	AGCUGCAGGCUCAGGU--GGGCUAA&UUGGCCUUAGCCUG-GCCUGUAGCC	0	0	NA	NA	NA	1	32.684	4	0.883765	Output/R8h/cleaveLand_result/t_plot/PC-3p-100264_81_BGI_novel_T006108_289_TPlot.pdf	0	0	NA	NA	NA	0	32.684	0	6.3879e-15	9.59436e-15	yes	GO:0097159(organic cyclic compound binding);GO:1901363(heterocyclic compound binding);GO:0005488(binding);GO:0003676(nucleic acid binding);GO:0003677(DNA binding)	NA
PC-3p-100264_81	BGI_novel_T007846	2931	2962	2953	-52.3	-35.8	0.684512	10.5	1-14,2962-2949;15-16,2946-2945;17-18,2943-2942;19-24,2936-2931	x-x,2948-2947[BULt];x-x,2944-2944[BULt];x-x,2941-2937[BULt]	((((((.....((.((..((((((((((((((&))))))))))))))--))-))-----))))))	GGCUAUGAAAUGGAGCAUCAGGCUGAGGCCAG&UUGGCCUUAGCCUG--GC-CU-----GUAGCC	0	0	NA	NA	NA	1	32.684	4	0.747311	Output/R8h/cleaveLand_result/t_plot/PC-3p-100264_81_BGI_novel_T007846_2953_TPlot.pdf	0	0	NA	NA	NA	0	32.684	0	6.3879e-15	9.59436e-15	yes	GO:0044238(primary metabolic process);GO:0044260(cellular macromolecule metabolic process);GO:0043231(intracellular membrane-bounded organelle);GO:0016311(dephosphorylation);GO:0043226(organelle);GO:0005622(intracellular);GO:0044267(cellular protein metabolic process);GO:0043412(macromolecule modification);GO:0005623(cell);GO:0004721(phosphoprotein phosphatase activity);GO:0003824(catalytic activ…	ko03013(RNA transport);ko03040(Spliceosome);ko03015(mRNA surveillance pathway)
PC-3p-100264_81	BGI_novel_T007848	2913	2944	2935	-52.3	-35.8	0.684512	10.5	1-14,2944-2931;15-16,2928-2927;17-18,2925-2924;19-24,2918-2913	x-x,2930-2929[BULt];x-x,2926-2926[BULt];x-x,2923-2919[BULt]	((((((.....((.((..((((((((((((((&))))))))))))))--))-))-----))))))	GGCUAUGAAAUGGAGCAUCAGGCUGAGGCCAG&UUGGCCUUAGCCUG--GC-CU-----GUAGCC	0	0	NA	NA	NA	1	32.684	4	0.741642	Output/R8h/cleaveLand_result/t_plot/PC-3p-100264_81_BGI_novel_T007848_2935_TPlot.pdf	0	0	NA	NA	NA	0	32.684	0	6.3879e-15	9.59436e-15	yes	GO:0044238(primary metabolic process);GO:0044260(cellular macromolecule metabolic process);GO:0043231(intracellular membrane-bounded organelle);GO:0016311(dephosphorylation);GO:0043226(organelle);GO:0005622(intracellular);GO:0044267(cellular protein metabolic process);GO:0043412(macromolecule modification);GO:0005623(cell);GO:0004721(phosphoprotein phosphatase activity);GO:0003824(catalytic activ…	ko03013(RNA transport);ko03040(Spliceosome);ko03015(mRNA surveillance pathway)
PC-3p-100264_81	BGI_novel_T011713	1250	1273	1264	-52.3	-34.3	0.655832	11	4-6,1270-1268;8-20,1266-1254;22-23,1252-1251	1-3,1273-1271[UP5];7-7,1267-1267[SIL];21-21,1253-1253[SIL];24-24,1250-1250[UP3]	.((.(((((((((((((.(((...&...))).))))))))))))).)).	CGCGGCAGGUCAGGCUGCGGCAUA&UUGGCCUUAGCCUGGCCUGUAGCC	0	0	NA	NA	NA	1	32.684	4	0.981972	Output/R8h/cleaveLand_result/t_plot/PC-3p-100264_81_BGI_novel_T011713_1264_TPlot.pdf	0	0	NA	NA	NA	0	32.684	0	6.3879e-15	9.59436e-15	yes	GO:0006810(transport);GO:0044425(membrane part);GO:0032559(adenyl ribonucleotide binding);GO:0022857(transmembrane transporter activity);GO:0017076(purine nucleotide binding);GO:0097367(carbohydrate derivative binding);GO:1901363(heterocyclic compound binding);GO:0042626(ATPase activity, coupled to transmembrane movement of substances);GO:0032553(ribonucleotide binding);GO:0000166(nucleotide bind…	ko02010(ABC transporters)
PC-3p-100264_81	XM_016079214.2	1633	1659	1650	-52.3	-34.8	0.665392	10.5	3-14,1657-1646;15-18,1644-1641;19-23,1638-1634	1-2,1659-1658[UP5];x-x,1645-1645[BULt];x-x,1640-1639[BULt];24-24,1633-1633[UP3]	.(((((..((((.((((((((((((..&..))))))))))))-))))--))))).	UGCUGCCCAGGCACAGGUUGAGGCUGU&UUGGCCUUAGCCUG-GCCU--GUAGCC	0	0	NA	NA	NA	1	32.684	4	0.944107	Output/R8h/cleaveLand_result/t_plot/PC-3p-100264_81_XM_016079214.2_1650_TPlot.pdf	0	0	NA	NA	NA	0	32.684	0	6.3879e-15	9.59436e-15	yes	GO:0051640(organelle localization);GO:0051649(establishment of localization in cell);GO:0019750(chloroplast localization);GO:0051179(localization);GO:0051234(establishment of localization);GO:0005829(cytosol);GO:0005623(cell);GO:0009904(chloroplast accumulation movement);GO:0009987(cellular process);GO:0051644(plastid localization);GO:0044444(cytoplasmic part);GO:0016043(cellular component organi…	NA
PC-3p-100264_81	XM_016079281.2	2048	2074	2065	-52.3	-34.8	0.665392	10.5	3-14,2072-2061;15-18,2059-2056;19-23,2053-2049	1-2,2074-2073[UP5];x-x,2060-2060[BULt];x-x,2055-2054[BULt];24-24,2048-2048[UP3]	.(((((..((((.((((((((((((..&..))))))))))))-))))--))))).	UGCUGCCCAGGCACAGGUUGAGGCUGU&UUGGCCUUAGCCUG-GCCU--GUAGCC	0	0	NA	NA	NA	0	0	NA	NA	NA	1	32.4181	4	0.952889	Output/R24h/cleaveLand_result/t_plot/PC-3p-100264_81_XM_016079281.2_2065_TPlot.pdf	0	0	32.4181	8.3342e-15	9.59436e-15	yes	GO:0051640(organelle localization);GO:0051649(establishment of localization in cell);GO:0019750(chloroplast localization);GO:0051179(localization);GO:0051234(establishment of localization);GO:0005829(cytosol);GO:0005623(cell);GO:0009904(chloroplast accumulation movement);GO:0009987(cellular process);GO:0051644(plastid localization);GO:0044444(cytoplasmic part);GO:0016043(cellular component organi…	NA
PC-3p-100264_81	XM_016080384.2	663	687	677	-52.3	-35.6	0.680688	11.5	2-4,686-684;7-23,680-664	1-1,687-687[UP5];5-6,683-681[AILt];24-24,663-663[UP3]	.(((((((((((((((((...(((.&.)))-..))))))))))))))))).	AGCUGCGGGCCGGGCUGAACUCCGC&UUGG-CCUUAGCCUGGCCUGUAGCC	0	0	NA	NA	NA	1	32.684	4	0.854891	Output/R8h/cleaveLand_result/t_plot/PC-3p-100264_81_XM_016080384.2_677_TPlot.pdf	0	0	NA	NA	NA	0	32.684	0	6.3879e-15	9.59436e-15	yes	GO:1901363(heterocyclic compound binding);GO:0005524(ATP binding);GO:0030554(adenyl nucleotide binding);GO:0043168(anion binding);GO:0043167(ion binding);GO:0035639(purine ribonucleoside triphosphate binding);GO:0005488(binding);GO:0097367(carbohydrate derivative binding);GO:0017076(purine nucleotide binding);GO:1901265(nucleoside phosphate binding);GO:0032555(purine ribonucleotide binding);GO:00…	ko04144(Endocytosis)
PC-3p-100264_81	XM_016082553.2	1429	1452	1443	-52.3	-34.7	0.66348	9	2-8,1451-1445;10-13,1443-1440;16-20,1437-1433;22-24,1431-1429	1-1,1452-1452[UP5];9-9,1444-1444[SIL];14-15,1439-1438[SIL];21-21,1432-1432[SIL]	(((.(((((..((((.(((((((.&.))))))).))))..))))).)))	GGCCGCGGGAAAGGCCGGGGCCAU&UUGGCCUUAGCCUGGCCUGUAGCC	0	0	NA	NA	NA	0	0	NA	NA	NA	1	32.4181	4	0.962558	Output/R24h/cleaveLand_result/t_plot/PC-3p-100264_81_XM_016082553.2_1443_TPlot.pdf	0	0	32.4181	8.3342e-15	9.59436e-15	yes	GO:0005215(transporter activity);GO:0022857(transmembrane transporter activity);GO:0015291(secondary active transmembrane transporter activity);GO:0006811(ion transport);GO:0006817(phosphate ion transport);GO:0051234(establishment of localization);GO:0031224(intrinsic component of membrane);GO:0055085(transmembrane transport);GO:0016020(membrane);GO:0015698(inorganic anion transport);GO:0022804(a…	NA
PC-3p-100264_81	XM_016082554.2	1544	1567	1558	-52.3	-34.7	0.66348	9	2-8,1566-1560;10-13,1558-1555;16-20,1552-1548;22-24,1546-1544	1-1,1567-1567[UP5];9-9,1559-1559[SIL];14-15,1554-1553[SIL];21-21,1547-1547[SIL]	(((.(((((..((((.(((((((.&.))))))).))))..))))).)))	GGCCGCGGGAAAGGCCGGGGCCAU&UUGGCCUUAGCCUGGCCUGUAGCC	0	0	NA	NA	NA	0	0	NA	NA	NA	1	32.4181	4	0.966621	Output/R24h/cleaveLand_result/t_plot/PC-3p-100264_81_XM_016082554.2_1558_TPlot.pdf	0	0	32.4181	8.3342e-15	9.59436e-15	yes	GO:0005215(transporter activity);GO:0022857(transmembrane transporter activity);GO:0015291(secondary active transmembrane transporter activity);GO:0006811(ion transport);GO:0006817(phosphate ion transport);GO:0051234(establishment of localization);GO:0031224(intrinsic component of membrane);GO:0055085(transmembrane transport);GO:0016020(membrane);GO:0015698(inorganic anion transport);GO:0022804(a…	NA
PC-3p-100264_81	XM_016083974.2	1332	1355	1346	-52.3	-34.3	0.655832	11	4-6,1352-1350;8-20,1348-1336;22-23,1334-1333	1-3,1355-1353[UP5];7-7,1349-1349[SIL];21-21,1335-1335[SIL];24-24,1332-1332[UP3]	.((.(((((((((((((.(((...&...))).))))))))))))).)).	CGCGGCAGGUCAGGCUGCGGCAUA&UUGGCCUUAGCCUGGCCUGUAGCC	0	0	NA	NA	NA	0	0	NA	NA	NA	1	32.4181	4	0.985062	Output/R24h/cleaveLand_result/t_plot/PC-3p-100264_81_XM_016083974.2_1346_TPlot.pdf	0	0	32.4181	8.3342e-15	9.59436e-15	yes	GO:0006810(transport);GO:0044425(membrane part);GO:0032559(adenyl ribonucleotide binding);GO:0022857(transmembrane transporter activity);GO:0017076(purine nucleotide binding);GO:0097367(carbohydrate derivative binding);GO:1901363(heterocyclic compound binding);GO:0042626(ATPase activity, coupled to transmembrane movement of substances);GO:0032553(ribonucleotide binding);GO:0000166(nucleotide bind…	ko02010(ABC transporters)
PC-3p-100264_81	XM_016087415.2	1036	1058	1050	-52.3	-34.3	0.655832	9.5	2-8,1057-1051;11-12,1049-1048;14-23,1046-1037	1-1,1058-1058[UP5];9-10,1050-1050[AILq];13-13,1047-1047[SIL];24-24,1036-1036[UP3]	.((((((((((.((.-(((((((.&.)))))))..)).)))))))))).	AGCUGCGGGCUUGGG-GAGGCCAU&UUGGCCUUAGCCUGGCCUGUAGCC	0	0	NA	NA	NA	0	0	NA	NA	NA	6	194.508	2	0.755288	Output/R24h/cleaveLand_result/t_plot/PC-3p-100264_81_XM_016087415.2_1050_TPlot.pdf	0	0	194.508	3.3159e-85	2.69709e-83	yes	NA	ko00750(Vitamin B6 metabolism)
PC-3p-100264_81	XM_016087442.2	244	267	258	-52.3	-35.4	0.676864	9	3-8,265-260;10-15,258-253;16-19,251-248;22-24,246-244	1-2,267-266[UP5];9-9,259-259[SIL];x-x,252-252[BULt];20-21,247-247[AILq]	(((.-((((.((((((.((((((..&..)))))).))))))-))))..)))	GGCC-CAGGCCCAGGCCGAGGCCCA&UUGGCCUUAGCCUGG-CCUGUAGCC	0	0	NA	NA	NA	1	32.684	4	0.881157	Output/R8h/cleaveLand_result/t_plot/PC-3p-100264_81_XM_016087442.2_258_TPlot.pdf	0	0	NA	NA	NA	0	32.684	0	6.3879e-15	9.59436e-15	yes	NA	NA
PC-3p-100264_81	XM_016088174.2	1080	1104	1095	-52.3	-34.7	0.66348	7	1-14,1104-1091;15-19,1089-1085;21-21,1083-1083;23-24,1081-1080	x-x,1090-1090[BULt];20-20,1084-1084[SIL];22-22,1082-1082[SIL]	((.(.(((((.((((((((((((((&))))))))))))))-))))).).))	GGGUCUAGGCGUAGGUUGAGGCCGA&UUGGCCUUAGCCUG-GCCUGUAGCC	0	0	NA	NA	NA	2	65.368	2	0.659656	Output/R8h/cleaveLand_result/t_plot/PC-3p-100264_81_XM_016088174.2_1095_TPlot.pdf	0	0	NA	NA	NA	0	65.368	0	4.0777e-29	2.60335e-28	yes	GO:0005488(binding);GO:0016021(integral component of membrane);GO:0035639(purine ribonucleoside triphosphate binding);GO:0006464(cellular protein modification process);GO:0004672(protein kinase activity);GO:0006793(phosphorus metabolic process);GO:0016773(phosphotransferase activity, alcohol group as acceptor);GO:0000166(nucleotide binding);GO:0006807(nitrogen compound metabolic process);GO:00717…	NA
PC-3p-100264_81	XM_016095616.2	565	589	580	-52.3	-36.1	0.690249	9.5	1-8,589-582;11-18,579-572;20-23,569-566	9-10,581-580[SIL];19-19,571-570[AILt];24-24,565-565[UP3]	.((((..((((((((..((((((((&))))))))..))))))))-.)))).	AGCUAAAGGGCCAGGAGGAGGCCGA&UUGGCCUUAGCCUGGCCU-GUAGCC	0	0	NA	NA	NA	1	32.684	4	0.677463	Output/R8h/cleaveLand_result/t_plot/PC-3p-100264_81_XM_016095616.2_580_TPlot.pdf	0	0	NA	NA	NA	0	32.684	0	6.3879e-15	9.59436e-15	yes	GO:0071704(organic substance metabolic process);GO:0090304(nucleic acid metabolic process);GO:0006396(RNA processing);GO:0008152(metabolic process);GO:0044237(cellular metabolic process);GO:0043170(macromolecule metabolic process);GO:0044260(cellular macromolecule metabolic process);GO:0034641(cellular nitrogen compound metabolic process);GO:0006725(cellular aromatic compound metabolic process);G…	ko03040(Spliceosome);ko03018(RNA degradation)
PC-3p-100264_81	XM_016098671.2	589	612	603	-52.3	-34.3	0.655832	5.5	1-12,612-601;14-16,600-598;17-18,596-595;20-20,593-593;22-24,591-589	13-13,x-x[BULq];x-x,597-597[BULt];19-19,594-594[SIL];21-21,592-592[SIL]	(((.(.((.(((-((((((((((((&)))))))))))).)))-)).).)))	GGCAAGAGAGCU-GGCUGAGGCCAA&UUGGCCUUAGCCUGGC-CUGUAGCC	1	39.6024	4	0.966088	Output/R0h/cleaveLand_result/t_plot/PC-3p-100264_81_XM_016098671.2_603_TPlot.pdf	0	0	NA	NA	NA	0	0	NA	NA	NA	39.6024	0	0	6.3194e-18	1.52182e-17	yes	GO:0016021(integral component of membrane);GO:0031224(intrinsic component of membrane);GO:0044425(membrane part);GO:0016020(membrane)	NA
PC-3p-100264_81	XM_016099540.2	7816	7840	7830	-52.3	-34.1	0.652008	9	1-5,7840-7836;6-14,7834-7826;16-21,7824-7819;23-24,7817-7816	x-x,7835-7835[BULt];15-15,7825-7825[SIL];22-22,7818-7818[SIL]	((.((((((.(((((((((.(((((&)))))-))))))))).)))))).))	GGGUGCAGGGCAGGUUGAGUGUUAG&UUGGC-CUUAGCCUGGCCUGUAGCC	0	0	NA	NA	NA	1	32.684	4	0.990735	Output/R8h/cleaveLand_result/t_plot/PC-3p-100264_81_XM_016099540.2_7830_TPlot.pdf	0	0	NA	NA	NA	0	32.684	0	6.3879e-15	9.59436e-15	yes	NA	NA
PC-3p-100264_81	XM_016100348.2	746	775	761	-52.3	-35.8	0.684512	15.5	2-7,774-769;8-9,763-762;11-14,760-757;15-24,755-746	1-1,775-775[UP5];x-x,768-764[BULt];10-10,761-761[SIL];x-x,756-756[BULt]	((((((((((.((((.((.....((((((.&.))))))-----)).))))-))))))))))	GGCUGCGGGUACAGGGUACUGGAAGGCCAC&UUGGCCU-----UAGCCUG-GCCUGUAGCC	5	198.012	2	0.279403	Output/R0h/cleaveLand_result/t_plot/PC-3p-100264_81_XM_016100348.2_761_TPlot.pdf	3	98.052	3	0.121212	Output/R8h/cleaveLand_result/t_plot/PC-3p-100264_81_XM_016100348.2_761_TPlot.pdf	0	0	NA	NA	NA	198.012	98.052	0	7.213e-44	1.65025e-42	yes	GO:0071704(organic substance metabolic process);GO:0044271(cellular nitrogen compound biosynthetic process);GO:1901360(organic cyclic compound metabolic process);GO:0044260(cellular macromolecule metabolic process);GO:0034654(nucleobase-containing compound biosynthetic process);GO:0008152(metabolic process);GO:0034641(cellular nitrogen compound metabolic process);GO:0009059(macromolecule biosynth…	ko03015(mRNA surveillance pathway);ko03018(RNA degradation);ko04120(Ubiquitin mediated proteolysis);ko00561(Glycerolipid metabolism);ko03013(RNA transport);ko01100(Metabolic pathways);ko04141(Protein processing in endoplasmic reticulum)
PC-3p-100264_81	XM_016102022.2	1217	1240	1231	-52.3	-34	0.650096	7.5	2-9,1239-1232;11-20,1230-1221;22-23,1219-1218	1-1,1240-1240[UP5];10-10,1231-1231[SIL];21-21,1220-1220[SIL];24-24,1217-1217[UP3]	.((.((((((((((.((((((((.&.)))))))).)))))))))).)).	UGUAGCAGGUCAGGAUAGGGCCAU&UUGGCCUUAGCCUGGCCUGUAGCC	0	0	NA	NA	NA	0	0	NA	NA	NA	1	32.4181	4	0.99404	Output/R24h/cleaveLand_result/t_plot/PC-3p-100264_81_XM_016102022.2_1231_TPlot.pdf	0	0	32.4181	8.3342e-15	9.59436e-15	yes	NA	ko00511(Other glycan degradation)
PC-3p-100264_81	XM_016102023.2	1229	1252	1243	-52.3	-34	0.650096	7.5	2-9,1251-1244;11-20,1242-1233;22-23,1231-1230	1-1,1252-1252[UP5];10-10,1243-1243[SIL];21-21,1232-1232[SIL];24-24,1229-1229[UP3]	.((.((((((((((.((((((((.&.)))))))).)))))))))).)).	UGUAGCAGGUCAGGAUAGGGCCAU&UUGGCCUUAGCCUGGCCUGUAGCC	0	0	NA	NA	NA	0	0	NA	NA	NA	2	64.8361	2	0.81365	Output/R24h/cleaveLand_result/t_plot/PC-3p-100264_81_XM_016102023.2_1243_TPlot.pdf	0	0	64.8361	6.941e-29	3.45403e-28	yes	NA	ko00511(Other glycan degradation)
PC-3p-100264_81	XM_016103586.2	1592	1615	1607	-52.3	-34.38	0.657361	7.5	1-8,1615-1608;10-15,1607-1602;16-17,1600-1599;21-24,1595-1592	9-9,x-x[BULq];x-x,1601-1601[BULt];18-20,1598-1596[SIL]	((((...((.((((((-((((((((&)))))))).))))))-))...))))	GGCUUGUGGUCCGGGC-AGGGCCAA&UUGGCCUUAGCCUGG-CCUGUAGCC	0	0	NA	NA	NA	0	0	NA	NA	NA	1	32.4181	4	0.979395	Output/R24h/cleaveLand_result/t_plot/PC-3p-100264_81_XM_016103586.2_1607_TPlot.pdf	0	0	32.4181	8.3342e-15	9.59436e-15	yes	GO:0003824(catalytic activity);GO:0005886(plasma membrane);GO:0005623(cell);GO:0001871(pattern binding);GO:0044464(cell part);GO:0016021(integral component of membrane);GO:0030246(carbohydrate binding);GO:0016798(hydrolase activity, acting on glycosyl bonds);GO:0044425(membrane part);GO:0044459(plasma membrane part);GO:0030247(polysaccharide binding);GO:0071704(organic substance metabolic process…	ko00500(Starch and sucrose metabolism)
PC-3p-100264_81	XM_016112933.2	620	646	636	-52.3	-34.2	0.65392	12	3-7,644-640;10-13,636-633;14-20,630-624;22-24,622-620	1-2,646-645[UP5];8-9,639-637[AILt];x-x,632-631[BULt];21-21,623-623[SIL]	(((.(((((((..((((...(((((..&..)))))-..))))--))))))).)))	GGCCACAGGCCCCAGGCCCUAGGCCCC&UUGGCCU-UAGCCU--GGCCUGUAGCC	0	0	NA	NA	NA	1	32.684	4	0.986489	Output/R8h/cleaveLand_result/t_plot/PC-3p-100264_81_XM_016112933.2_636_TPlot.pdf	0	0	NA	NA	NA	0	32.684	0	6.3879e-15	9.59436e-15	yes	NA	NA
PC-3p-100264_81	XM_016113267.2	2913	2944	2935	-52.3	-35.8	0.684512	10.5	1-14,2944-2931;15-16,2928-2927;17-18,2925-2924;19-24,2918-2913	x-x,2930-2929[BULt];x-x,2926-2926[BULt];x-x,2923-2919[BULt]	((((((.....((.((..((((((((((((((&))))))))))))))--))-))-----))))))	GGCUAUGAAAUGGAGCAUCAGGCUGAGGCCAG&UUGGCCUUAGCCUG--GC-CU-----GUAGCC	1	39.6024	4	0.72401	Output/R0h/cleaveLand_result/t_plot/PC-3p-100264_81_XM_016113267.2_2935_TPlot.pdf	0	0	NA	NA	NA	0	0	NA	NA	NA	39.6024	0	0	6.3194e-18	1.52182e-17	yes	GO:0044238(primary metabolic process);GO:0044260(cellular macromolecule metabolic process);GO:0043231(intracellular membrane-bounded organelle);GO:0016311(dephosphorylation);GO:0043226(organelle);GO:0005622(intracellular);GO:0044267(cellular protein metabolic process);GO:0043412(macromolecule modification);GO:0005623(cell);GO:0004721(phosphoprotein phosphatase activity);GO:0003824(catalytic activ…	ko03013(RNA transport);ko03040(Spliceosome);ko03015(mRNA surveillance pathway)
PC-3p-100264_81	XM_016114588.2	476	499	490	-52.3	-34.6	0.661568	8.5	1-11,499-489;12-13,487-486;15-18,484-481;22-24,478-476	x-x,488-488[BULt];14-14,485-485[SIL];19-21,480-479[AILq]	(((..-((((.((.(((((((((((&)))))))))))-)).))))...)))	GGCGA-GGGCGGGCGUUAAGGCCAG&UUGGCCUUAGC-CUGGCCUGUAGCC	0	0	NA	NA	NA	1	32.684	4	0.963333	Output/R8h/cleaveLand_result/t_plot/PC-3p-100264_81_XM_016114588.2_490_TPlot.pdf	1	32.4181	4	0.967379	Output/R24h/cleaveLand_result/t_plot/PC-3p-100264_81_XM_016114588.2_490_TPlot.pdf	0	32.684	32.4181	8.5335e-08	8.81903e-08	yes	GO:0046395(carboxylic acid catabolic process);GO:0045548(phenylalanine ammonia-lyase activity);GO:0003824(catalytic activity);GO:0044424(intracellular part);GO:0016840(carbon-nitrogen lyase activity);GO:0009698(phenylpropanoid metabolic process);GO:0006807(nitrogen compound metabolic process);GO:0008152(metabolic process);GO:1901564(organonitrogen compound metabolic process);GO:0009063(cellular a…	ko01100(Metabolic pathways);ko00360(Phenylalanine metabolism);ko00940(Phenylpropanoid biosynthesis);ko01110(Biosynthesis of secondary metabolites)
PC-3p-100264_81	XM_016117981.2	481	505	495	-52.3	-34	0.650096	9	3-6,503-500;7-13,498-492;14-19,490-485;21-24,484-481	1-2,505-504[UP5];x-x,499-499[BULt];x-x,491-491[BULt];20-20,x-x[BULq]	((((-((((((.(((((((.((((..&..))))-)))))))-)))))).))))	GGUU-CGGGCCGAGGCUAACGGCUCC&UUGGCC-UUAGCCU-GGCCUGUAGCC	0	0	NA	NA	NA	1	32.684	4	0.993646	Output/R8h/cleaveLand_result/t_plot/PC-3p-100264_81_XM_016117981.2_495_TPlot.pdf	0	0	NA	NA	NA	0	32.684	0	6.3879e-15	9.59436e-15	yes	GO:0005488(binding);GO:0097159(organic cyclic compound binding);GO:1901363(heterocyclic compound binding)	ko03040(Spliceosome)
PC-3p-100264_81	XM_016117982.2	482	506	496	-52.3	-34	0.650096	9	3-6,504-501;7-13,499-493;14-19,491-486;21-24,485-482	1-2,506-505[UP5];x-x,500-500[BULt];x-x,492-492[BULt];20-20,x-x[BULq]	((((-((((((.(((((((.((((..&..))))-)))))))-)))))).))))	GGUU-CGGGCCGAGGCUAACGGCUCC&UUGGCC-UUAGCCU-GGCCUGUAGCC	1	39.6024	4	0.984046	Output/R0h/cleaveLand_result/t_plot/PC-3p-100264_81_XM_016117982.2_496_TPlot.pdf	1	32.684	4	0.993208	Output/R8h/cleaveLand_result/t_plot/PC-3p-100264_81_XM_016117982.2_496_TPlot.pdf	0	0	NA	NA	NA	39.6024	32.684	0	8.6245e-09	9.35023e-09	yes	GO:0005488(binding);GO:0097159(organic cyclic compound binding);GO:1901363(heterocyclic compound binding)	ko03040(Spliceosome)
PC-3p-100264_81	XM_021127228.1	482	506	496	-52.3	-34	0.650096	9	3-6,504-501;7-13,499-493;14-19,491-486;21-24,485-482	1-2,506-505[UP5];x-x,500-500[BULt];x-x,492-492[BULt];20-20,x-x[BULq]	((((-((((((.(((((((.((((..&..))))-)))))))-)))))).))))	GGUU-CGGGCCGAGGCUAACGGCUCC&UUGGCC-UUAGCCU-GGCCUGUAGCC	2	79.2048	2	0.714971	Output/R0h/cleaveLand_result/t_plot/PC-3p-100264_81_XM_021127228.1_496_TPlot.pdf	0	0	NA	NA	NA	0	0	NA	NA	NA	79.2048	0	0	3.9892e-35	3.86508e-34	yes	GO:0005488(binding);GO:0097159(organic cyclic compound binding);GO:1901363(heterocyclic compound binding)	ko03040(Spliceosome)
PC-3p-101862_79	BGI_novel_T011691	1063	1086	1077	-45.4	-31.2	0.687225	8	1-1,1086-1086;3-4,1084-1083;6-15,1081-1072;18-24,1069-1063	2-2,1085-1085[SIL];5-5,1082-1082[SIL];16-17,1071-1070[SIL]	(((((((..((((((((((.((.(&).)).))))))))))..)))))))	GGGUGGAGGUGGGUGCAGUGGAGU&AGUCGACUGCACCUGAAUUCACCU	0	0	NA	NA	NA	1	32.684	4	0.631538	Output/R8h/cleaveLand_result/t_plot/PC-3p-101862_79_BGI_novel_T011691_1077_TPlot.pdf	0	0	NA	NA	NA	0	32.684	0	6.3879e-15	9.59436e-15	yes	NA	ko00860(Porphyrin and chlorophyll metabolism);ko00053(Ascorbate and aldarate metabolism);ko00040(Pentose and glucuronate interconversions);ko01110(Biosynthesis of secondary metabolites);ko01100(Metabolic pathways);ko00906(Carotenoid biosynthesis)
PC-3p-101862_79	XM_016078856.2	822	843	834	-45.4	-29.9	0.65859	5	2-13,842-831;15-18,829-826;21-24,825-822	1-1,843-843[UP5];14-14,830-830[SIL];19-20,x-x[BULq]	((((--((((.((((((((((((.&.)))))))))))).))))..))))	AGGU--AUUCUGGUGCAGUUGACA&AGUCGACUGCACCUGAAUUCACCU	0	0	NA	NA	NA	1	32.684	4	0.83051	Output/R8h/cleaveLand_result/t_plot/PC-3p-101862_79_XM_016078856.2_834_TPlot.pdf	0	0	NA	NA	NA	0	32.684	0	6.3879e-15	9.59436e-15	yes	GO:0005737(cytoplasm);GO:0016740(transferase activity);GO:0005623(cell);GO:0044444(cytoplasmic part);GO:0005982(starch metabolic process);GO:0044249(cellular biosynthetic process);GO:0043231(intracellular membrane-bounded organelle);GO:0009501(amyloplast);GO:0046527(glucosyltransferase activity);GO:0009507(chloroplast);GO:0009987(cellular process);GO:0009250(glucan biosynthetic process);GO:004442…	ko01110(Biosynthesis of secondary metabolites);ko00500(Starch and sucrose metabolism);ko01100(Metabolic pathways)
PC-3p-101862_79	XM_016096771.2	852	878	866	-45.4	-31.5	0.693833	14	1-4,878-875;7-8,872-871;9-23,867-853	5-6,874-873[SIL];x-x,870-868[BULt];24-24,852-852[UP3]	.(((((((((((((((...((..((((&))))..))---))))))))))))))).	CGGUGGAUUCGGGUGCUGCGGAGGGCU&AGUCGACU---GCACCUGAAUUCACCU	0	0	NA	NA	NA	0	0	NA	NA	NA	2	64.8361	2	0.277783	Output/R24h/cleaveLand_result/t_plot/PC-3p-101862_79_XM_016096771.2_866_TPlot.pdf	0	0	64.8361	6.941e-29	3.45403e-28	yes	GO:0044260(cellular macromolecule metabolic process);GO:0006470(protein dephosphorylation);GO:1901564(organonitrogen compound metabolic process);GO:0006807(nitrogen compound metabolic process);GO:0008152(metabolic process);GO:0006796(phosphate-containing compound metabolic process);GO:0016787(hydrolase activity);GO:0009987(cellular process);GO:0044237(cellular metabolic process);GO:0044238(primar…	NA
PC-3p-101862_79	XM_021139518.1	1868	1893	1884	-45.4	-40	0.881057	3	1-16,1893-1878;18-24,1874-1868	17-17,1877-1875[AILt]	(((((((...((((((((((((((((&))))))))))))))))--.)))))))	AGGUGAAAACUCAGGUGCAGUCGACU&AGUCGACUGCACCUGA--AUUCACCU	0	0	NA	NA	NA	0	0	NA	NA	NA	1	32.4181	4	0.0449041	Output/R24h/cleaveLand_result/t_plot/PC-3p-101862_79_XM_021139518.1_1884_TPlot.pdf	0	0	32.4181	8.3342e-15	9.59436e-15	yes	GO:0046872(metal ion binding);GO:0019748(secondary metabolic process);GO:0046906(tetrapyrrole binding);GO:0020037(heme binding);GO:0016491(oxidoreductase activity);GO:0016709(oxidoreductase activity, acting on paired donors, with incorporation or reduction of molecular oxygen, NAD(P)H as one donor, and incorporation of one atom of oxygen);GO:0016021(integral component of membrane);GO:0044550(seco…	ko01110(Biosynthesis of secondary metabolites);ko00380(Tryptophan metabolism);ko00591(Linoleic acid metabolism);ko00232(Caffeine metabolism);ko01100(Metabolic pathways)
PC-3p-104925_76	XM_016089742.2	1478	1501	1492	-36.9	-24.9	0.674797	12.5	5-14,1497-1488;16-22,1486-1480	1-4,1501-1498[UP5];15-15,1487-1487[SIL];23-24,1479-1478[UP3]	..(((((((.((((((((((....&....)))))))))).)))))))..	UCGCUCAGGAACGGUCGAUUGCCG&AUGAAAUUGACUGUACCUGAGUUU	0	0	NA	NA	NA	1	32.684	4	0.937549	Output/R8h/cleaveLand_result/t_plot/PC-3p-104925_76_XM_016089742.2_1492_TPlot.pdf	0	0	NA	NA	NA	0	32.684	0	6.3879e-15	9.59436e-15	yes	NA	NA
PC-3p-104925_76	XM_016095692.2	1297	1321	1312	-36.9	-25	0.677507	6	1-17,1321-1305;18-22,1303-1299	x-x,1304-1304[BULt];23-24,1298-1297[UP3]	..(((((.(((((((((((((((((&)))))))))))))))))-)))))..	AUAUUUAUGGUACAGUUGAUUUCAU&AUGAAAUUGACUGUACC-UGAGUUU	0	0	NA	NA	NA	0	0	NA	NA	NA	1	32.4181	4	0.921908	Output/R24h/cleaveLand_result/t_plot/PC-3p-104925_76_XM_016095692.2_1312_TPlot.pdf	0	0	32.4181	8.3342e-15	9.59436e-15	yes	GO:0046910(pectinesterase inhibitor activity);GO:0030312(external encapsulating structure);GO:0045490(pectin catabolic process);GO:0016052(carbohydrate catabolic process);GO:0009987(cellular process);GO:0016788(hydrolase activity, acting on ester bonds);GO:0009056(catabolic process);GO:0030599(pectinesterase activity);GO:0043086(negative regulation of catalytic activity);GO:0044238(primary metabo…	ko00040(Pentose and glucuronate interconversions);ko01100(Metabolic pathways)
PC-3p-104925_76	XM_016095988.2	1407	1430	1421	-36.9	-25.3	0.685637	16	8-24,1423-1407	1-7,1430-1424[UP5]	(((((((((((((((((.......&.......)))))))))))))))))	GGGCUCAGGUAUGGUCAGAGCUGG&AUGAAAUUGACUGUACCUGAGUUU	0	0	NA	NA	NA	2	65.368	2	0.544288	Output/R8h/cleaveLand_result/t_plot/PC-3p-104925_76_XM_016095988.2_1421_TPlot.pdf	0	0	NA	NA	NA	0	65.368	0	4.0777e-29	2.60335e-28	yes	GO:0032774(RNA biosynthetic process);GO:0043231(intracellular membrane-bounded organelle);GO:0005849(mRNA cleavage factor complex);GO:0044422(organelle part);GO:0006351(transcription, DNA-templated);GO:0034641(cellular nitrogen compound metabolic process);GO:0006397(mRNA processing);GO:0043175(RNA polymerase core enzyme binding);GO:0005488(binding);GO:0044446(intracellular organelle part);GO:0043…	ko03015(mRNA surveillance pathway)
PC-3p-104925_76	XM_021127277.1	108	136	127	-36.9	-26.8	0.726287	16	2-11,135-126;12-21,120-111	1-1,136-136[UP5];x-x,125-121[BULt];22-24,110-108[UP3]	...((((((((((.....((((((((((.&.))))))))))-----))))))))))...	UGCCUCAGGUACGGUUACGUCAGUUUCAA&AUGAAAUUGAC-----UGUACCUGAGUUU	0	0	NA	NA	NA	0	0	NA	NA	NA	1	32.4181	4	0.847971	Output/R24h/cleaveLand_result/t_plot/PC-3p-104925_76_XM_021127277.1_127_TPlot.pdf	0	0	32.4181	8.3342e-15	9.59436e-15	yes	GO:0009987(cellular process);GO:0071704(organic substance metabolic process);GO:1903047(mitotic cell cycle process);GO:0051716(cellular response to stimulus);GO:0032559(adenyl ribonucleotide binding);GO:0005488(binding);GO:0005622(intracellular);GO:0005524(ATP binding);GO:0022402(cell cycle process);GO:0044237(cellular metabolic process);GO:0006974(cellular response to DNA damage stimulus);GO:000…	NA
PC-3p-105086_75	XM_016088691.2	1028	1053	1043	-41.8	-27.2	0.650718	7	1-3,1053-1051;4-16,1049-1037;17-19,1035-1033;21-23,1031-1029	x-x,1050-1050[BULt];x-x,1036-1036[BULt];20-20,1032-1032[SIL];24-24,1028-1028[UP3]	.(((.(((.(((((((((((((.(((&)))-)))))))))))))-))).))).	UACUAAGGUUGUAGUUGACUUCAAUG&CGU-GAAGUCGACUACA-CCUAAGUU	2	79.2048	2	0.225452	Output/R0h/cleaveLand_result/t_plot/PC-3p-105086_75_XM_016088691.2_1043_TPlot.pdf	0	0	NA	NA	NA	2	64.8361	2	0.293996	Output/R24h/cleaveLand_result/t_plot/PC-3p-105086_75_XM_016088691.2_1043_TPlot.pdf	79.2048	0	64.8361	7.822e-17	1.85572e-16	yes	GO:0034641(cellular nitrogen compound metabolic process);GO:0046483(heterocycle metabolic process);GO:0006366(transcription from RNA polymerase II promoter);GO:0009058(biosynthetic process);GO:0006367(transcription initiation from RNA polymerase II promoter);GO:0003723(RNA binding);GO:0009059(macromolecule biosynthetic process);GO:1901576(organic substance biosynthetic process);GO:0003677(DNA bin…	ko03022(Basal transcription factors)
PC-3p-1060_9765	XM_016079474.2	1989	2009	2000	-37	-25.5	0.689189	8	1-5,2009-2005;7-8,2003-2002;10-19,2000-1991	6-6,2004-2004[SIL];9-9,2001-2001[SIL];20-21,1990-1989[UP3]	..((((((((((.((.(((((&))))).)).))))))))))..	UUGCUGUUCUUUGGAUGUAGG&CCUAUUUCGGAAGAACAGCCA	1	39.6024	4	0.629584	Output/R0h/cleaveLand_result/t_plot/PC-3p-1060_9765_XM_016079474.2_2000_TPlot.pdf	0	0	NA	NA	NA	0	0	NA	NA	NA	39.6024	0	0	6.3194e-18	1.52182e-17	yes	GO:0097367(carbohydrate derivative binding);GO:0031984(organelle subcompartment);GO:0016021(integral component of membrane);GO:0043229(intracellular organelle);GO:0044425(membrane part);GO:0043226(organelle);GO:1901265(nucleoside phosphate binding);GO:0005488(binding);GO:0031224(intrinsic component of membrane);GO:0055114(oxidation-reduction process);GO:0005622(intracellular);GO:0016653(oxidoredu…	NA
PC-3p-1060_9765	XM_016082100.2	414	442	425	-37	-26.1	0.705405	18.5	1-6,442-437;7-8,429-428;9-21,426-414	x-x,436-430[BULt];x-x,427-427[BULt]	(((((((((((((.((.......((((((&))))))-------))-)))))))))))))	UGGCUGUUUUUCCUGAAUCACUGGAUGGG&CCUAUU-------UC-GGAAGAACAGCCA	1	39.6024	4	0.344921	Output/R0h/cleaveLand_result/t_plot/PC-3p-1060_9765_XM_016082100.2_425_TPlot.pdf	0	0	NA	NA	NA	1	32.4181	4	0.410423	Output/R24h/cleaveLand_result/t_plot/PC-3p-1060_9765_XM_016082100.2_425_TPlot.pdf	39.6024	0	32.4181	8.8481e-09	9.41666e-09	yes	NA	NA
PC-3p-1060_9765	XM_016086384.2	388	408	399	-37	-24.74	0.668649	11	1-10,408-399;16-20,393-389	11-15,398-394[SIL];21-21,388-388[UP3]	.(((((.....((((((((((&)))))))))).....))))).	AGGCUGACAUGCCGGAGUGGG&CCUAUUUCGGAAGAACAGCCA	0	0	NA	NA	NA	0	0	NA	NA	NA	1	32.4181	4	0.951794	Output/R24h/cleaveLand_result/t_plot/PC-3p-1060_9765_XM_016086384.2_399_TPlot.pdf	0	0	32.4181	8.3342e-15	9.59436e-15	yes	GO:0071704(organic substance metabolic process);GO:0009987(cellular process);GO:0009310(amine catabolic process);GO:0019439(aromatic compound catabolic process);GO:0042430(indole-containing compound metabolic process);GO:0016811(hydrolase activity, acting on carbon-nitrogen (but not peptide) bonds, in linear amides);GO:0016787(hydrolase activity);GO:0009074(aromatic amino acid family catabolic pr…	NA
PC-3p-1060_9765	XM_016087079.2	440	461	452	-37	-24.8	0.67027	9	1-4,461-458;7-13,455-449;15-19,446-442	5-6,457-456[SIL];14-14,448-447[AILt];20-21,441-440[UP3]	..(((((..(((((((..((((&))))..)))))))-.)))))..	CAGCUGUGGCUUCCGAUUUGGG&CCUAUUUCGGAAG-AACAGCCA	0	0	NA	NA	NA	1	32.684	4	0.923747	Output/R8h/cleaveLand_result/t_plot/PC-3p-1060_9765_XM_016087079.2_452_TPlot.pdf	0	0	NA	NA	NA	0	32.684	0	6.3879e-15	9.59436e-15	yes	GO:0016740(transferase activity);GO:0009987(cellular process);GO:0006644(phospholipid metabolic process);GO:0008152(metabolic process);GO:0090407(organophosphate biosynthetic process);GO:0006657(CDP-choline pathway);GO:1901576(organic substance biosynthetic process);GO:0006629(lipid metabolic process);GO:0019637(organophosphate metabolic process);GO:0003824(catalytic activity);GO:0046486(glycerol…	ko00564(Glycerophospholipid metabolism);ko01100(Metabolic pathways)
PC-3p-1060_9765	XM_016088364.2	2584	2604	2595	-37	-24.7	0.667568	8	1-2,2604-2603;5-14,2600-2591;16-20,2589-2585	3-4,2602-2601[SIL];15-15,2590-2590[SIL];21-21,2584-2584[UP3]	.(((((.((((((((((..((&))..)))))))))).))))).	AGGCUGAUCUUCUGGAAAUGG&CCUAUUUCGGAAGAACAGCCA	0	0	NA	NA	NA	1	32.684	4	0.953197	Output/R8h/cleaveLand_result/t_plot/PC-3p-1060_9765_XM_016088364.2_2595_TPlot.pdf	0	0	NA	NA	NA	0	32.684	0	6.3879e-15	9.59436e-15	yes	NA	NA
PC-3p-1060_9765	XM_016091536.2	1282	1303	1293	-37	-25	0.675676	8	1-4,1303-1300;6-18,1297-1285;20-20,1283-1283	5-5,1299-1298[AILt];19-19,1284-1284[SIL];21-21,1282-1282[UP3]	.(.(((((((((((((..((((&))))-.))))))))))))).).	AGCCUGUUCUUCCGGAUUUGGG&CCUA-UUUCGGAAGAACAGCCA	0	0	NA	NA	NA	1	32.684	4	0.875765	Output/R8h/cleaveLand_result/t_plot/PC-3p-1060_9765_XM_016091536.2_1293_TPlot.pdf	0	0	NA	NA	NA	0	32.684	0	6.3879e-15	9.59436e-15	yes	GO:0005623(cell);GO:0005622(intracellular);GO:0044464(cell part);GO:0044424(intracellular part)	NA
PC-3p-1060_9765	XM_016096293.2	943	968	954	-37	-24.6	0.664865	13	2-7,967-962;8-17,956-947;19-21,945-943	1-1,968-968[UP5];x-x,961-957[BULt];18-18,946-946[SIL]	(((.((((((((((.....((((((.&.))))))-----)))))))))).)))	UGGGUGUUCUUCCGCGGCAAAAUGGA&CCUAUUU-----CGGAAGAACAGCCA	0	0	NA	NA	NA	0	0	NA	NA	NA	1	32.4181	4	0.973472	Output/R24h/cleaveLand_result/t_plot/PC-3p-1060_9765_XM_016096293.2_954_TPlot.pdf	0	0	32.4181	8.3342e-15	9.59436e-15	yes	GO:0031224(intrinsic component of membrane);GO:0016021(integral component of membrane);GO:0044425(membrane part);GO:0016020(membrane)	NA
PC-3p-1060_9765	XM_016101782.2	488	511	501	-37	-25.78	0.696757	7	1-9,511-503;10-13,501-498;16-21,493-488	x-x,502-502[BULt];14-15,497-494[AILt]	((((((....((((.(((((((((&)))))))))-))))--..))))))	UGGCUGGCGGCUUCUUGAAAUAGG&CCUAUUUCG-GAAG--AACAGCCA	2	79.2048	3	0.0548494	Output/R0h/cleaveLand_result/t_plot/PC-3p-1060_9765_XM_016101782.2_501_TPlot.pdf	2	65.368	3	0.0838736	Output/R8h/cleaveLand_result/t_plot/PC-3p-1060_9765_XM_016101782.2_501_TPlot.pdf	2	64.8361	3	0.0780633	Output/R24h/cleaveLand_result/t_plot/PC-3p-1060_9765_XM_016101782.2_501_TPlot.pdf	79.2048	65.368	64.8361	0.38642	0.388887	yes	NA	NA
PC-3p-1060_9765	XM_016102697.2	455	475	466	-37	-25.3	0.683784	7	3-19,473-457	1-2,475-474[UP5];20-21,456-455[UP3]	..(((((((((((((((((..&..)))))))))))))))))..	AUGCUGUUCUUCUGAAAUGUU&CCUAUUUCGGAAGAACAGCCA	3	118.807	2	0.30688	Output/R0h/cleaveLand_result/t_plot/PC-3p-1060_9765_XM_016102697.2_466_TPlot.pdf	0	0	NA	NA	NA	0	0	NA	NA	NA	118.807	0	0	2.5157e-52	6.74078e-51	yes	NA	ko00511(Other glycan degradation)
PC-3p-1060_9765	XM_016102850.2	1199	1221	1212	-37	-24.9	0.672973	5.5	2-17,1220-1205;18-20,1202-1200	1-1,1221-1221[UP5];x-x,1204-1203[BULt];21-21,1199-1199[UP3]	.(((..((((((((((((((((.&.))))))))))))))))--))).	AGGCCCUGUUUUUCUGAAAUAGA&CCUAUUUCGGAAGAACA--GCCA	1	39.6024	4	0.870158	Output/R0h/cleaveLand_result/t_plot/PC-3p-1060_9765_XM_016102850.2_1212_TPlot.pdf	1	32.684	4	0.914801	Output/R8h/cleaveLand_result/t_plot/PC-3p-1060_9765_XM_016102850.2_1212_TPlot.pdf	1	32.4181	4	0.921908	Output/R24h/cleaveLand_result/t_plot/PC-3p-1060_9765_XM_016102850.2_1212_TPlot.pdf	39.6024	32.684	32.4181	0.62164	0.621776	yes	GO:0006807(nitrogen compound metabolic process);GO:0030554(adenyl nucleotide binding);GO:0008152(metabolic process);GO:0016773(phosphotransferase activity, alcohol group as acceptor);GO:0043167(ion binding);GO:0071704(organic substance metabolic process);GO:0032559(adenyl ribonucleotide binding);GO:1901564(organonitrogen compound metabolic process);GO:0044260(cellular macromolecule metabolic proc…	ko03008(Ribosome biogenesis in eukaryotes)
PC-3p-1060_9765	XM_016107234.2	196	219	206	-37	-24.18	0.653514	13	1-8,219-212;10-14,206-202;16-21,201-196	9-9,211-207[AILt];15-15,x-x[BULq]	((((((-(((((.....((((((((&))))))))----.))))).))))))	UGGCUG-UCUUCAUGGGGAGAUGGG&CCUAUUUC----GGAAGAACAGCCA	1	39.6024	4	0.982185	Output/R0h/cleaveLand_result/t_plot/PC-3p-1060_9765_XM_016107234.2_206_TPlot.pdf	0	0	NA	NA	NA	0	0	NA	NA	NA	39.6024	0	0	6.3194e-18	1.52182e-17	yes	NA	ko04626(Plant-pathogen interaction)
PC-3p-1060_9765	XM_016109283.2	1202	1225	1215	-37	-25.1	0.678378	10	1-3,1225-1223;5-16,1220-1209;18-20,1205-1203	4-4,1222-1221[AILt];17-17,1208-1206[AILt];21-21,1202-1202[UP3]	.(((...((((((((((((..(((&)))-.))))))))))))--.))).	CGGCGACGUUCUUCCGGAGAGAGG&CCU-AUUUCGGAAGAAC--AGCCA	0	0	NA	NA	NA	0	0	NA	NA	NA	2	64.8361	2	0.458287	Output/R24h/cleaveLand_result/t_plot/PC-3p-1060_9765_XM_016109283.2_1215_TPlot.pdf	0	0	64.8361	6.941e-29	3.45403e-28	yes	NA	ko03015(mRNA surveillance pathway)
PC-3p-1060_9765	XM_016109435.2	238	264	255	-37	-24.44	0.660541	20	1-3,264-262;5-10,260-255;13-21,246-238	4-4,261-261[SIL];11-12,254-247[AILt]	(((((((((........((((((.(((&))).))))))------..)))))))))	UGGCUGUUCAUGUCCCGCCGAAGGGGG&CCUAUUUCGG------AAGAACAGCCA	0	0	NA	NA	NA	0	0	NA	NA	NA	1	32.4181	4	0.978916	Output/R24h/cleaveLand_result/t_plot/PC-3p-1060_9765_XM_016109435.2_255_TPlot.pdf	0	0	32.4181	8.3342e-15	9.59436e-15	yes	NA	NA
PC-3p-1060_9765	XM_021139545.1	475	495	486	-37	-25.3	0.683784	7	3-19,493-477	1-2,495-494[UP5];20-21,476-475[UP3]	..(((((((((((((((((..&..)))))))))))))))))..	AUGCUGUUCUUCUGAAAUGUU&CCUAUUUCGGAAGAACAGCCA	1	39.6024	4	0.680264	Output/R0h/cleaveLand_result/t_plot/PC-3p-1060_9765_XM_021139545.1_486_TPlot.pdf	0	0	NA	NA	NA	0	0	NA	NA	NA	39.6024	0	0	6.3194e-18	1.52182e-17	yes	NA	ko00511(Other glycan degradation)
PC-3p-1060_9765	XM_021139724.1	821	843	834	-37	-24.9	0.672973	5.5	2-17,842-827;18-20,824-822	1-1,843-843[UP5];x-x,826-825[BULt];21-21,821-821[UP3]	.(((..((((((((((((((((.&.))))))))))))))))--))).	AGGCCCUGUUUUUCUGAAAUAGA&CCUAUUUCGGAAGAACA--GCCA	1	39.6024	4	0.867747	Output/R0h/cleaveLand_result/t_plot/PC-3p-1060_9765_XM_021139724.1_834_TPlot.pdf	0	0	NA	NA	NA	0	0	NA	NA	NA	39.6024	0	0	6.3194e-18	1.52182e-17	yes	GO:0006807(nitrogen compound metabolic process);GO:0030554(adenyl nucleotide binding);GO:0008152(metabolic process);GO:0016773(phosphotransferase activity, alcohol group as acceptor);GO:0043167(ion binding);GO:0071704(organic substance metabolic process);GO:0032559(adenyl ribonucleotide binding);GO:1901564(organonitrogen compound metabolic process);GO:0044260(cellular macromolecule metabolic proc…	ko03008(Ribosome biogenesis in eukaryotes)
PC-3p-1060_9765	XM_021142435.1	239	265	256	-37	-24.44	0.660541	20	1-3,265-263;5-10,261-256;13-21,247-239	4-4,262-262[SIL];11-12,255-248[AILt]	(((((((((........((((((.(((&))).))))))------..)))))))))	UGGCUGUUCAUGUCCCGCCGAAGGGGG&CCUAUUUCGG------AAGAACAGCCA	0	0	NA	NA	NA	0	0	NA	NA	NA	1	32.4181	4	0.979395	Output/R24h/cleaveLand_result/t_plot/PC-3p-1060_9765_XM_021142435.1_256_TPlot.pdf	0	0	32.4181	8.3342e-15	9.59436e-15	yes	NA	NA
PC-3p-107728_73	XM_016082672.2	616	637	630	-47.1	-30.8	0.653928	12.5	4-7,634-631;10-23,630-617	1-3,637-635[UP5];8-9,x-x[BULq];24-24,616-616[UP3]	.((((((((((((((--((((...&...))))..)))))))))))))).	GUCGGGUGCAGCGGC--CGUGGUU&UCACAUGAAGUCGCUGCACCUGAG	1	39.6024	4	0.805403	Output/R0h/cleaveLand_result/t_plot/PC-3p-107728_73_XM_016082672.2_630_TPlot.pdf	0	0	NA	NA	NA	0	0	NA	NA	NA	39.6024	0	0	6.3194e-18	1.52182e-17	yes	GO:0016829(lyase activity);GO:0016836(hydro-lyase activity);GO:0008152(metabolic process);GO:0016835(carbon-oxygen lyase activity);GO:0003824(catalytic activity)	ko01110(Biosynthesis of secondary metabolites);ko01210(2-Oxocarboxylic acid metabolism);ko01100(Metabolic pathways);ko01230(Biosynthesis of amino acids);ko00660(C5-Branched dibasic acid metabolism);ko00290(Valine, leucine and isoleucine biosynthesis)
PC-3p-107728_73	XM_016096585.2	695	719	710	-47.1	-34.9	0.740977	5.5	1-11,719-709;13-24,706-695	12-12,708-707[AILt]	((((((((((((..(((((((((((&)))))))))))-.))))))))))))	UUUAGGUGCAGUUAACUUCAUGUGA&UCACAUGAAGU-CGCUGCACCUGAG	0	0	NA	NA	NA	0	0	NA	NA	NA	1	32.4181	4	0.36836	Output/R24h/cleaveLand_result/t_plot/PC-3p-107728_73_XM_016096585.2_710_TPlot.pdf	0	0	32.4181	8.3342e-15	9.59436e-15	yes	NA	NA
PC-3p-107728_73	XM_021132348.1	622	643	636	-47.1	-30.8	0.653928	12.5	4-7,640-637;10-23,636-623	1-3,643-641[UP5];8-9,x-x[BULq];24-24,622-622[UP3]	.((((((((((((((--((((...&...))))..)))))))))))))).	GUCGGGUGCAGCGGC--CGUGGUU&UCACAUGAAGUCGCUGCACCUGAG	0	0	NA	NA	NA	1	32.684	4	0.837867	Output/R8h/cleaveLand_result/t_plot/PC-3p-107728_73_XM_021132348.1_636_TPlot.pdf	0	0	NA	NA	NA	0	32.684	0	6.3879e-15	9.59436e-15	yes	GO:0016829(lyase activity);GO:0016836(hydro-lyase activity);GO:0008152(metabolic process);GO:0016835(carbon-oxygen lyase activity);GO:0003824(catalytic activity)	ko01110(Biosynthesis of secondary metabolites);ko01210(2-Oxocarboxylic acid metabolism);ko01100(Metabolic pathways);ko01230(Biosynthesis of amino acids);ko00660(C5-Branched dibasic acid metabolism);ko00290(Valine, leucine and isoleucine biosynthesis)
PC-3p-107728_73	XM_021132349.1	622	643	636	-47.1	-30.8	0.653928	12.5	4-7,640-637;10-23,636-623	1-3,643-641[UP5];8-9,x-x[BULq];24-24,622-622[UP3]	.((((((((((((((--((((...&...))))..)))))))))))))).	GUCGGGUGCAGCGGC--CGUGGUU&UCACAUGAAGUCGCUGCACCUGAG	0	0	NA	NA	NA	2	65.368	2	0.482453	Output/R8h/cleaveLand_result/t_plot/PC-3p-107728_73_XM_021132349.1_636_TPlot.pdf	0	0	NA	NA	NA	0	65.368	0	4.0777e-29	2.60335e-28	yes	GO:0016829(lyase activity);GO:0016836(hydro-lyase activity);GO:0008152(metabolic process);GO:0016835(carbon-oxygen lyase activity);GO:0003824(catalytic activity)	ko01110(Biosynthesis of secondary metabolites);ko01210(2-Oxocarboxylic acid metabolism);ko01100(Metabolic pathways);ko01230(Biosynthesis of amino acids);ko00660(C5-Branched dibasic acid metabolism);ko00290(Valine, leucine and isoleucine biosynthesis)
PC-3p-108384_72	BGI_novel_T001417	1747	1772	1761	-45.2	-31.04	0.686726	13.5	2-6,1771-1767;11-24,1760-1747	1-1,1772-1772[UP5];7-10,1766-1761[AILt]	((((((((((((((......(((((.&.)))))--....))))))))))))))	GAACUCAGGUGCAGAACAUCCCAUGG&ACAUGG--UCGACUGCACCUGAGUUU	0	0	NA	NA	NA	0	0	NA	NA	NA	1	32.4181	4	0.644322	Output/R24h/cleaveLand_result/t_plot/PC-3p-108384_72_BGI_novel_T001417_1761_TPlot.pdf	0	0	32.4181	8.3342e-15	9.59436e-15	yes	GO:0051252(regulation of RNA metabolic process);GO:0080090(regulation of primary metabolic process);GO:0040029(regulation of gene expression, epigenetic);GO:0036094(small molecule binding);GO:0010556(regulation of macromolecule biosynthetic process);GO:0008094(DNA-dependent ATPase activity);GO:0043167(ion binding);GO:0005634(nucleus);GO:0016043(cellular component organization);GO:0050789(regulati…	NA
PC-3p-108384_72	BGI_novel_T005413	329	353	344	-45.2	-32.1	0.710177	8.5	2-3,352-351;5-11,349-343;13-20,341-334;21-23,332-330	1-1,353-353[UP5];4-4,350-350[SIL];12-12,342-342[SIL];x-x,333-333[BULt];24-24,329-329[UP3]	.(((.((((((((.(((((((.((.&.)).))))))).))))))))-))).	UGACUUCAGGUGCUGUCGGCCUUGG&ACAUGGUCGACUGCACCUGA-GUUU	0	0	NA	NA	NA	0	0	NA	NA	NA	1	32.4181	4	0.449686	Output/R24h/cleaveLand_result/t_plot/PC-3p-108384_72_BGI_novel_T005413_344_TPlot.pdf	0	0	32.4181	8.3342e-15	9.59436e-15	yes	GO:0006807(nitrogen compound metabolic process);GO:1901566(organonitrogen compound biosynthetic process);GO:1901265(nucleoside phosphate binding);GO:0019202(amino acid kinase activity);GO:0016310(phosphorylation);GO:0006560(proline metabolic process);GO:1901564(organonitrogen compound metabolic process);GO:0005623(cell);GO:0016903(oxidoreductase activity, acting on the aldehyde or oxo group of do…	ko01230(Biosynthesis of amino acids);ko01100(Metabolic pathways);ko00330(Arginine and proline metabolism);ko01110(Biosynthesis of secondary metabolites)
PC-3p-108384_72	XM_016082672.2	612	635	627	-45.2	-33.7	0.745575	9	2-9,634-627;11-20,626-617;21-22,615-614	1-1,635-635[UP5];10-10,x-x[BULq];x-x,616-616[BULt];23-24,613-612[UP3]	..((.((((((((((-((((((((.&.)))))))).))))))))))-))..	GCGCGUCGGGUGCAG-CGGCCGUGG&ACAUGGUCGACUGCACCUGA-GUUU	0	0	NA	NA	NA	1	32.684	4	0.372447	Output/R8h/cleaveLand_result/t_plot/PC-3p-108384_72_XM_016082672.2_627_TPlot.pdf	0	0	NA	NA	NA	0	32.684	0	6.3879e-15	9.59436e-15	yes	GO:0016829(lyase activity);GO:0016836(hydro-lyase activity);GO:0008152(metabolic process);GO:0016835(carbon-oxygen lyase activity);GO:0003824(catalytic activity)	ko01110(Biosynthesis of secondary metabolites);ko01210(2-Oxocarboxylic acid metabolism);ko01100(Metabolic pathways);ko01230(Biosynthesis of amino acids);ko00660(C5-Branched dibasic acid metabolism);ko00290(Valine, leucine and isoleucine biosynthesis)
PC-3p-108384_72	XM_016082917.2	1369	1393	1384	-45.2	-31.6	0.699115	8	2-10,1392-1384;11-19,1382-1374;21-22,1372-1371	1-1,1393-1393[UP5];x-x,1383-1383[BULt];20-20,1373-1373[SIL];23-24,1370-1369[UP3]	..((.(((((((((.(((((((((.&.)))))))))-))))))))).))..	UUACACAGGUGCAGCUUGACCGUGC&ACAUGGUCGA-CUGCACCUGAGUUU	0	0	NA	NA	NA	1	32.684	4	0.519137	Output/R8h/cleaveLand_result/t_plot/PC-3p-108384_72_XM_016082917.2_1384_TPlot.pdf	0	0	NA	NA	NA	0	32.684	0	6.3879e-15	9.59436e-15	yes	GO:0008152(metabolic process);GO:0031966(mitochondrial membrane);GO:0044429(mitochondrial part);GO:0044260(cellular macromolecule metabolic process);GO:0044464(cell part);GO:0071704(organic substance metabolic process);GO:0015833(peptide transport);GO:0005488(binding);GO:0006627(protein processing involved in protein targeting to mitochondrion);GO:0007005(mitochondrion organization);GO:0046907(in…	NA
PC-3p-108384_72	XM_016106127.2	916	938	930	-45.2	-29.4	0.650442	10.5	2-6,937-933;8-8,932-932;11-24,929-916	1-1,938-938[UP5];7-7,x-x[BULq];9-10,931-930[SIL]	((((((((((((((..(-(((((.&.))))).)..))))))))))))))	GAACUCGGGUGUGGGAG-CUAUGG&ACAUGGUCGACUGCACCUGAGUUU	0	0	NA	NA	NA	1	32.684	4	0.920287	Output/R8h/cleaveLand_result/t_plot/PC-3p-108384_72_XM_016106127.2_930_TPlot.pdf	0	0	NA	NA	NA	0	32.684	0	6.3879e-15	9.59436e-15	yes	GO:0070011(peptidase activity, acting on L-amino acid peptides);GO:0004252(serine-type endopeptidase activity);GO:0008152(metabolic process);GO:0019538(protein metabolic process);GO:1901564(organonitrogen compound metabolic process);GO:0004175(endopeptidase activity);GO:0006508(proteolysis);GO:0006807(nitrogen compound metabolic process);GO:0003824(catalytic activity);GO:0008233(peptidase activit…	NA
PC-3p-108384_72	XM_021132348.1	618	641	633	-45.2	-33.7	0.745575	9	2-9,640-633;11-20,632-623;21-22,621-620	1-1,641-641[UP5];10-10,x-x[BULq];x-x,622-622[BULt];23-24,619-618[UP3]	..((.((((((((((-((((((((.&.)))))))).))))))))))-))..	GCGCGUCGGGUGCAG-CGGCCGUGG&ACAUGGUCGACUGCACCUGA-GUUU	0	0	NA	NA	NA	1	32.684	4	0.358368	Output/R8h/cleaveLand_result/t_plot/PC-3p-108384_72_XM_021132348.1_633_TPlot.pdf	0	0	NA	NA	NA	0	32.684	0	6.3879e-15	9.59436e-15	yes	GO:0016829(lyase activity);GO:0016836(hydro-lyase activity);GO:0008152(metabolic process);GO:0016835(carbon-oxygen lyase activity);GO:0003824(catalytic activity)	ko01110(Biosynthesis of secondary metabolites);ko01210(2-Oxocarboxylic acid metabolism);ko01100(Metabolic pathways);ko01230(Biosynthesis of amino acids);ko00660(C5-Branched dibasic acid metabolism);ko00290(Valine, leucine and isoleucine biosynthesis)
PC-3p-108384_72	XM_021132349.1	618	641	633	-45.2	-33.7	0.745575	9	2-9,640-633;11-20,632-623;21-22,621-620	1-1,641-641[UP5];10-10,x-x[BULq];x-x,622-622[BULt];23-24,619-618[UP3]	..((.((((((((((-((((((((.&.)))))))).))))))))))-))..	GCGCGUCGGGUGCAG-CGGCCGUGG&ACAUGGUCGACUGCACCUGA-GUUU	0	0	NA	NA	NA	2	65.368	2	0.126044	Output/R8h/cleaveLand_result/t_plot/PC-3p-108384_72_XM_021132349.1_633_TPlot.pdf	1	32.4181	4	0.338663	Output/R24h/cleaveLand_result/t_plot/PC-3p-108384_72_XM_021132349.1_633_TPlot.pdf	0	65.368	32.4181	5.8362e-15	9.59436e-15	yes	GO:0016829(lyase activity);GO:0016836(hydro-lyase activity);GO:0008152(metabolic process);GO:0016835(carbon-oxygen lyase activity);GO:0003824(catalytic activity)	ko01110(Biosynthesis of secondary metabolites);ko01210(2-Oxocarboxylic acid metabolism);ko01100(Metabolic pathways);ko01230(Biosynthesis of amino acids);ko00660(C5-Branched dibasic acid metabolism);ko00290(Valine, leucine and isoleucine biosynthesis)
PC-3p-110122_70	BGI_novel_T001319	3358	3384	3370	-32.1	-21.8	0.679128	16.5	1-5,3384-3380;6-17,3374-3363;19-21,3361-3359	x-x,3379-3375[BULt];18-18,3362-3362[SIL];22-22,3358-3358[UP3]	.(((.((((((((((((.....(((((&)))))-----)))))))))))).))).	CGGCCAAGUUGGCGAGAUGGAAGUCCU&AGGAU-----UCUUGUUAACUUUGCUU	0	0	NA	NA	NA	3	98.052	2	0.988186	Output/R8h/cleaveLand_result/t_plot/PC-3p-110122_70_BGI_novel_T001319_3370_TPlot.pdf	0	0	NA	NA	NA	0	98.052	0	2.6011e-43	4.90923e-42	yes	GO:0032555(purine ribonucleotide binding);GO:0017076(purine nucleotide binding);GO:0005319(lipid transporter activity);GO:0016192(vesicle-mediated transport);GO:0004012(phospholipid-translocating ATPase activity);GO:0048194(Golgi vesicle budding);GO:0005622(intracellular);GO:0005623(cell);GO:0036094(small molecule binding);GO:0035639(purine ribonucleoside triphosphate binding);GO:0046872(metal io…	NA
PC-3p-110122_70	BGI_novel_T001367	1556	1582	1573	-32.1	-24.8	0.772586	13.5	2-10,1581-1573;11-22,1567-1556	1-1,1582-1582[UP5];x-x,1572-1568[BULt]	((((((((((((.....(((((((((.&.)))))))))-----))))))))))))	AGGCAAAGUUGAGGGCUCAAGGAUCCC&AGGAUUCUUG-----UUAACUUUGCUU	1	39.6024	4	0.554793	Output/R0h/cleaveLand_result/t_plot/PC-3p-110122_70_BGI_novel_T001367_1573_TPlot.pdf	0	0	NA	NA	NA	0	0	NA	NA	NA	39.6024	0	0	6.3194e-18	1.52182e-17	yes	NA	ko03015(mRNA surveillance pathway)
PC-3p-110122_70	BGI_novel_T003031	1596	1621	1612	-32.1	-21.16	0.65919	13.5	2-12,1620-1610;15-22,1603-1596	1-1,1621-1621[UP5];13-14,1609-1604[AILt]	((((((((......(((((((((((.&.)))))))))))----..))))))))	AAGCAGAGAGGGUGAGCAAGAAUUCA&AGGAUUCUUGUU----AACUUUGCUU	0	0	NA	NA	NA	0	0	NA	NA	NA	1	32.4181	4	1	Output/R24h/cleaveLand_result/t_plot/PC-3p-110122_70_BGI_novel_T003031_1612_TPlot.pdf	0	0	32.4181	8.3342e-15	9.59436e-15	yes	NA	ko03013(RNA transport)
PC-3p-110122_70	BGI_novel_T003099	1232	1263	1253	-32.1	-21.4	0.666667	23.5	1-7,1263-1257;8-12,1255-1251;13-22,1241-1232	x-x,1256-1256[BULt];x-x,1250-1242[BULt]	((((((((((.........(((((.(((((((&)))))))-)))))---------))))))))))	GAGCAAAGUUCCAAUGCGAGACGGCGAAUCCU&AGGAUUC-UUGUU---------AACUUUGCUU	0	0	NA	NA	NA	0	0	NA	NA	NA	1	32.4181	4	1	Output/R24h/cleaveLand_result/t_plot/PC-3p-110122_70_BGI_novel_T003099_1253_TPlot.pdf	0	0	32.4181	8.3342e-15	9.59436e-15	yes	GO:0032501(multicellular organismal process);GO:0044260(cellular macromolecule metabolic process);GO:0006796(phosphate-containing compound metabolic process);GO:0043412(macromolecule modification);GO:0044425(membrane part);GO:0006793(phosphorus metabolic process);GO:0003824(catalytic activity);GO:0044267(cellular protein metabolic process);GO:0005886(plasma membrane);GO:1901363(heterocyclic compo…	NA
PC-3p-110122_70	BGI_novel_T003525	1802	1823	1814	-32.1	-27.6	0.859813	4	1-2,1823-1822;4-22,1820-1802	3-3,1821-1821[SIL]	(((((((((((((((((((.((&)).)))))))))))))))))))	GAGUAAAGUUGACAAGAAUGCU&AGGAUUCUUGUUAACUUUGCUU	0	0	NA	NA	NA	1	32.684	4	0.216557	Output/R8h/cleaveLand_result/t_plot/PC-3p-110122_70_BGI_novel_T003525_1814_TPlot.pdf	0	0	NA	NA	NA	0	32.684	0	6.3879e-15	9.59436e-15	yes	GO:0003677(DNA binding);GO:0043232(intracellular non-membrane-bounded organelle);GO:0005524(ATP binding);GO:0097159(organic cyclic compound binding);GO:0004003(ATP-dependent DNA helicase activity);GO:0043140(ATP-dependent 3'-5' DNA helicase activity);GO:0006139(nucleobase-containing compound metabolic process);GO:0035639(purine ribonucleoside triphosphate binding);GO:0043170(macromolecule metabol…	ko03440(Homologous recombination)
PC-3p-110122_70	BGI_novel_T004138	2156	2179	2170	-32.1	-21.1	0.657321	9.5	2-14,2178-2166;15-17,2164-2162;19-21,2159-2157	1-1,2179-2179[UP5];x-x,2165-2165[BULt];18-18,2161-2160[AILt];22-22,2156-2156[UP3]	.(((..(((.(((((((((((((.&.)))))))))))))-)))-.))).	UAGCUUAGGUUUGGCAGGAGUCCC&AGGAUUCUUGUUAA-CUU-UGCUU	1	39.6024	4	1	Output/R0h/cleaveLand_result/t_plot/PC-3p-110122_70_BGI_novel_T004138_2170_TPlot.pdf	0	0	NA	NA	NA	0	0	NA	NA	NA	39.6024	0	0	6.3194e-18	1.52182e-17	yes	GO:0051179(localization);GO:0008324(cation transmembrane transporter activity);GO:0005623(cell);GO:0006811(ion transport);GO:0015672(monovalent inorganic cation transport);GO:0015293(symporter activity);GO:0005355(glucose transmembrane transporter activity);GO:0044459(plasma membrane part);GO:0071944(cell periphery);GO:0071702(organic substance transport);GO:0015075(ion transmembrane transporter …	ko00190(Oxidative phosphorylation);ko00500(Starch and sucrose metabolism);ko01100(Metabolic pathways)
PC-3p-110122_70	BGI_novel_T006260	889	911	901	-32.1	-21.6	0.672897	11	2-3,910-909;4-9,907-902;11-20,900-891	1-1,911-911[UP5];x-x,908-908[BULt];10-10,901-901[SIL];21-22,890-889[UP3]	..((((((((((.((((((.((.&.))-)))))).))))))))))..	AUGCAAAGUUGAGGAGAGUACUA&AGG-AUUCUUGUUAACUUUGCUU	0	0	NA	NA	NA	1	32.684	4	1	Output/R8h/cleaveLand_result/t_plot/PC-3p-110122_70_BGI_novel_T006260_901_TPlot.pdf	0	0	NA	NA	NA	0	32.684	0	6.3879e-15	9.59436e-15	yes	GO:0044238(primary metabolic process);GO:0016311(dephosphorylation);GO:0046488(phosphatidylinositol metabolic process);GO:0003824(catalytic activity);GO:0046839(phospholipid dephosphorylation);GO:0009987(cellular process);GO:0030258(lipid modification);GO:0006650(glycerophospholipid metabolic process);GO:0016787(hydrolase activity);GO:0046856(phosphatidylinositol dephosphorylation);GO:0008152(met…	ko01100(Metabolic pathways);ko00562(Inositol phosphate metabolism);ko04070(Phosphatidylinositol signaling system)
PC-3p-110122_70	BGI_novel_T007328	4048	4069	4060	-32.1	-21.6	0.672897	8.5	1-4,4069-4066;6-19,4064-4051	5-5,4065-4065[SIL];20-22,4050-4048[UP3]	...((((((((((((((.((((&)))).))))))))))))))...	GAACAGAGUUGAUGAGACUCCU&AGGAUUCUUGUUAACUUUGCUU	0	0	NA	NA	NA	0	0	NA	NA	NA	1	32.4181	4	1	Output/R24h/cleaveLand_result/t_plot/PC-3p-110122_70_BGI_novel_T007328_4060_TPlot.pdf	0	0	32.4181	8.3342e-15	9.59436e-15	yes	GO:0044424(intracellular part);GO:0005634(nucleus);GO:0005623(cell);GO:0005488(binding);GO:0003682(chromatin binding);GO:0043231(intracellular membrane-bounded organelle);GO:0043229(intracellular organelle);GO:0043227(membrane-bounded organelle);GO:0043226(organelle);GO:0044464(cell part);GO:0005622(intracellular)	NA
PC-3p-110122_70	BGI_novel_T012165	1163	1183	1174	-32.1	-20.9	0.65109	9	1-9,1183-1175;11-16,1173-1168;19-20,1166-1165	10-10,1174-1174[SIL];17-18,1167-1167[AILq];21-22,1164-1163[UP3]	..((.-((((((.(((((((((&))))))))).))))))..))..	ACGUU-GGUUGAGGAGAAUCCU&AGGAUUCUUGUUAACUUUGCUU	0	0	NA	NA	NA	0	0	NA	NA	NA	1	32.4181	4	1	Output/R24h/cleaveLand_result/t_plot/PC-3p-110122_70_BGI_novel_T012165_1174_TPlot.pdf	0	0	32.4181	8.3342e-15	9.59436e-15	yes	GO:0008152(metabolic process);GO:0046483(heterocycle metabolic process);GO:0006807(nitrogen compound metabolic process);GO:0006725(cellular aromatic compound metabolic process);GO:0009987(cellular process);GO:0043170(macromolecule metabolic process);GO:0006139(nucleobase-containing compound metabolic process);GO:1901360(organic cyclic compound metabolic process);GO:0090304(nucleic acid metabolic …	NA
PC-3p-110122_70	BGI_novel_T012465	1434	1457	1448	-32.1	-22	0.685358	9	1-12,1457-1446;15-18,1443-1440;19-21,1437-1435	13-14,1445-1444[SIL];x-x,1439-1438[BULt];22-22,1434-1434[UP3]	.(((..((((..((((((((((((&))))))))))))..))))--))).	CAGCCUGGAGGCGGCAGGAAUCCU&AGGAUUCUUGUUAACUUU--GCUU	0	0	NA	NA	NA	1	32.684	4	0.999976	Output/R8h/cleaveLand_result/t_plot/PC-3p-110122_70_BGI_novel_T012465_1448_TPlot.pdf	0	0	NA	NA	NA	0	32.684	0	6.3879e-15	9.59436e-15	yes	GO:0016020(membrane);GO:0051234(establishment of localization);GO:0044425(membrane part);GO:0055085(transmembrane transport);GO:0051179(localization);GO:0006810(transport);GO:0031224(intrinsic component of membrane);GO:0016021(integral component of membrane)	NA
PC-3p-110122_70	BGI_novel_T012512	1587	1609	1600	-32.1	-23.2	0.722741	4.5	1-14,1609-1596;15-22,1594-1587	x-x,1595-1595[BULt]	((((((((.((((((((((((((&))))))))))))))-))))))))	AAGCAAGGAUUAACAAGGAUUUU&AGGAUUCUUGUUAA-CUUUGCUU	3	118.807	2	0.663296	Output/R0h/cleaveLand_result/t_plot/PC-3p-110122_70_BGI_novel_T012512_1600_TPlot.pdf	0	0	NA	NA	NA	0	0	NA	NA	NA	118.807	0	0	2.5157e-52	6.74078e-51	yes	GO:0006518(peptide metabolic process);GO:0016875(ligase activity, forming carbon-oxygen bonds);GO:0043043(peptide biosynthetic process);GO:0036094(small molecule binding);GO:0044249(cellular biosynthetic process);GO:0043168(anion binding);GO:0009058(biosynthetic process);GO:0043038(amino acid activation);GO:0044281(small molecule metabolic process);GO:1901576(organic substance biosynthetic proces…	ko00970(Aminoacyl-tRNA biosynthesis)
PC-3p-110122_70	BGI_novel_T013110	325	346	337	-32.1	-23.48	0.731464	8	2-11,345-336;15-21,332-326	1-1,346-346[UP5];12-14,335-333[SIL];22-22,325-325[UP3]	.(((((((...((((((((((.&.))))))))))...))))))).	CAGCAAAGCUUGCGAGAAUCCC&AGGAUUCUUGUUAACUUUGCUU	1	39.6024	4	0.951904	Output/R0h/cleaveLand_result/t_plot/PC-3p-110122_70_BGI_novel_T013110_337_TPlot.pdf	0	0	NA	NA	NA	0	0	NA	NA	NA	39.6024	0	0	6.3194e-18	1.52182e-17	yes	GO:0006605(protein targeting);GO:0015031(protein transport);GO:0044464(cell part);GO:0005488(binding);GO:0006613(cotranslational protein targeting to membrane);GO:0051649(establishment of localization in cell);GO:0071705(nitrogen compound transport);GO:0072594(establishment of protein localization to organelle);GO:0006810(transport);GO:0005622(intracellular);GO:0006612(protein targeting to membra…	ko03060(Protein export)
PC-3p-110122_70	XM_016076143.2	699	721	711	-32.1	-21.7	0.676012	11.5	2-4,720-718;6-20,715-701	1-1,721-721[UP5];5-5,717-716[AILt];21-22,700-699[UP3]	..(((((((((((((((..(((.&.)))-.)))))))))))))))..	AUGCAGAGUUGACAGGGCUUUCG&AGGA-UUCUUGUUAACUUUGCUU	1	39.6024	4	0.999994	Output/R0h/cleaveLand_result/t_plot/PC-3p-110122_70_XM_016076143.2_711_TPlot.pdf	0	0	NA	NA	NA	0	0	NA	NA	NA	39.6024	0	0	6.3194e-18	1.52182e-17	yes	GO:0016787(hydrolase activity);GO:0003824(catalytic activity)	NA
PC-3p-110122_70	XM_016078063.2	41	62	53	-32.1	-21.4	0.666667	7.5	2-8,61-55;10-12,53-51;15-22,48-41	1-1,62-62[UP5];9-9,54-54[SIL];13-14,50-49[SIL]	((((((((..(((.(((((((.&.))))))).)))..))))))))	GAGCAAAGCGAAUUGGAAUCCC&AGGAUUCUUGUUAACUUUGCUU	0	0	NA	NA	NA	0	0	NA	NA	NA	1	32.4181	4	1	Output/R24h/cleaveLand_result/t_plot/PC-3p-110122_70_XM_016078063.2_53_TPlot.pdf	0	0	32.4181	8.3342e-15	9.59436e-15	yes	GO:0022618(ribonucleoprotein complex assembly);GO:0005622(intracellular);GO:0016070(RNA metabolic process);GO:0044422(organelle part);GO:0005634(nucleus);GO:0071826(ribonucleoprotein complex subunit organization);GO:0005687(U4 snRNP);GO:0034622(cellular macromolecular complex assembly);GO:0005686(U2 snRNP);GO:0034641(cellular nitrogen compound metabolic process);GO:0005682(U5 snRNP);GO:0044464(ce…	ko03040(Spliceosome)
PC-3p-110122_70	XM_016078791.2	835	858	849	-32.1	-22.4	0.697819	8	2-10,857-849;11-12,846-845;15-22,842-835	1-1,858-858[UP5];x-x,848-847[BULt];13-14,844-843[SIL]	((((((((..((..(((((((((.&.)))))))))--))..))))))))	AAGCAAAGGCAAACCAGGAAUCCA&AGGAUUCUUG--UUAACUUUGCUU	0	0	NA	NA	NA	0	0	NA	NA	NA	1	32.4181	4	0.999831	Output/R24h/cleaveLand_result/t_plot/PC-3p-110122_70_XM_016078791.2_849_TPlot.pdf	0	0	32.4181	8.3342e-15	9.59436e-15	yes	GO:0016746(transferase activity, transferring acyl groups);GO:0016740(transferase activity);GO:0003824(catalytic activity);GO:0016747(transferase activity, transferring acyl groups other than amino-acyl groups)	NA
PC-3p-110122_70	XM_016078998.1	1566	1588	1579	-32.1	-21.3	0.663551	8	1-2,1588-1587;5-15,1584-1574;16-22,1572-1566	3-4,1586-1585[SIL];x-x,1573-1573[BULt]	(((((((.(((((((((((..((&))..)))))))))))-)))))))	AAGCAGGUGUUGACAAGAGAACU&AGGAUUCUUGUUAAC-UUUGCUU	0	0	NA	NA	NA	1	32.684	4	1	Output/R8h/cleaveLand_result/t_plot/PC-3p-110122_70_XM_016078998.1_1579_TPlot.pdf	0	0	NA	NA	NA	0	32.684	0	6.3879e-15	9.59436e-15	yes	GO:0051179(localization);GO:0022406(membrane docking);GO:0006810(transport);GO:0051640(organelle localization);GO:0051641(cellular localization);GO:0032940(secretion by cell);GO:0051234(establishment of localization);GO:0048278(vesicle docking);GO:0009987(cellular process);GO:0140056(organelle localization by membrane tethering);GO:0006904(vesicle docking involved in exocytosis);GO:0046903(secret…	ko04144(Endocytosis)
PC-3p-110122_70	XM_016079227.2	1805	1825	1817	-32.1	-21.2	0.660436	10	2-3,1824-1823;5-9,1822-1818;11-22,1816-1805	1-1,1825-1825[UP5];4-4,x-x[BULq];10-10,1817-1817[SIL]	((((((((((((.(((((-((.&.)).))))).))))))))))))	AGGCAAGGUUGAGGAGAG-CUG&AGGAUUCUUGUUAACUUUGCUU	2	79.2048	3	0.739197	Output/R0h/cleaveLand_result/t_plot/PC-3p-110122_70_XM_016079227.2_1817_TPlot.pdf	0	0	NA	NA	NA	1	32.4181	4	1	Output/R24h/cleaveLand_result/t_plot/PC-3p-110122_70_XM_016079227.2_1817_TPlot.pdf	79.2048	0	32.4181	3.1075e-19	1.30585e-18	yes	GO:0005623(cell);GO:0065007(biological regulation);GO:0050789(regulation of biological process);GO:0009987(cellular process);GO:0065008(regulation of biological quality);GO:0050794(regulation of cellular process);GO:0042592(homeostatic process);GO:0019725(cellular homeostasis);GO:0045454(cell redox homeostasis)	NA
PC-3p-110122_70	XM_016079967.2	1016	1037	1028	-32.1	-22.3	0.694704	9.5	3-9,1035-1029;11-21,1027-1017	1-2,1037-1036[UP5];10-10,1028-1028[SIL];22-22,1016-1016[UP3]	.(((((((((((.(((((((..&..))))))).))))))))))).	CAGUAGGGUUAGGGAGAAUCGC&AGGAUUCUUGUUAACUUUGCUU	1	39.6024	4	0.999385	Output/R0h/cleaveLand_result/t_plot/PC-3p-110122_70_XM_016079967.2_1028_TPlot.pdf	6	196.104	2	0.950652	Output/R8h/cleaveLand_result/t_plot/PC-3p-110122_70_XM_016079967.2_1028_TPlot.pdf	10	324.181	2	0.952279	Output/R24h/cleaveLand_result/t_plot/PC-3p-110122_70_XM_016079967.2_1028_TPlot.pdf	39.6024	196.104	324.181	5.2559e-48	1.27933e-46	yes	GO:0008270(zinc ion binding);GO:0019538(protein metabolic process);GO:0032446(protein modification by small protein conjugation);GO:0046872(metal ion binding);GO:0061659(ubiquitin-like protein ligase activity);GO:1901564(organonitrogen compound metabolic process);GO:0043632(modification-dependent macromolecule catabolic process);GO:0044257(cellular protein catabolic process);GO:0042787(protein ub…	NA
PC-3p-110122_70	XM_016080200.2	370	390	382	-32.1	-21.3	0.663551	9	2-3,389-388;5-11,387-381;13-21,379-371	1-1,390-390[UP5];4-4,x-x[BULq];12-12,380-380[SIL];22-22,370-370[UP3]	.(((((((((.(((((((-((.&.)).))))))).))))))))).	UGGCAAGGUUUACAAGGG-CCA&AGGAUUCUUGUUAACUUUGCUU	1	39.6024	4	1	Output/R0h/cleaveLand_result/t_plot/PC-3p-110122_70_XM_016080200.2_382_TPlot.pdf	0	0	NA	NA	NA	0	0	NA	NA	NA	39.6024	0	0	6.3194e-18	1.52182e-17	yes	GO:0006468(protein phosphorylation);GO:0032553(ribonucleotide binding);GO:0009987(cellular process);GO:0097159(organic cyclic compound binding);GO:0043167(ion binding);GO:0019538(protein metabolic process);GO:0018193(peptidyl-amino acid modification);GO:0043168(anion binding);GO:0000166(nucleotide binding);GO:0032555(purine ribonucleotide binding);GO:0016772(transferase activity, transferring pho…	NA
PC-3p-110122_70	XM_016080239.2	1999	2020	2011	-32.1	-21.6	0.672897	9.5	3-22,2018-1999	1-2,2020-2019[UP5]	((((((((((((((((((((..&..))))))))))))))))))))	AGGUGGGGUUAGCAAGGGUUGC&AGGAUUCUUGUUAACUUUGCUU	1	39.6024	4	0.999997	Output/R0h/cleaveLand_result/t_plot/PC-3p-110122_70_XM_016080239.2_2011_TPlot.pdf	0	0	NA	NA	NA	2	64.8361	2	0.994563	Output/R24h/cleaveLand_result/t_plot/PC-3p-110122_70_XM_016080239.2_2011_TPlot.pdf	39.6024	0	64.8361	4.7251e-14	5.31115e-14	yes	GO:0044464(cell part);GO:0043227(membrane-bounded organelle);GO:0043229(intracellular organelle);GO:0044424(intracellular part);GO:0005545(1-phosphatidylinositol binding);GO:0005543(phospholipid binding);GO:0043168(anion binding);GO:0043623(cellular protein complex assembly);GO:0097708(intracellular vesicle);GO:0070271(protein complex biogenesis);GO:0016043(cellular component organization);GO:006…	NA
PC-3p-110122_70	XM_016080239.2	557	577	568	-32.1	-22.4	0.697819	8.5	1-12,577-566;15-20,564-559	13-14,565-565[AILq];21-22,558-557[UP3]	..((((((.-((((((((((((&))))))))))))..))))))..	ACGCAGAGG-GAUGAGGAUCCU&AGGAUUCUUGUUAACUUUGCUU	0	0	NA	NA	NA	2	65.368	2	0.938689	Output/R8h/cleaveLand_result/t_plot/PC-3p-110122_70_XM_016080239.2_568_TPlot.pdf	0	0	NA	NA	NA	0	65.368	0	4.0777e-29	2.60335e-28	yes	GO:0044464(cell part);GO:0043227(membrane-bounded organelle);GO:0043229(intracellular organelle);GO:0044424(intracellular part);GO:0005545(1-phosphatidylinositol binding);GO:0005543(phospholipid binding);GO:0043168(anion binding);GO:0043623(cellular protein complex assembly);GO:0097708(intracellular vesicle);GO:0070271(protein complex biogenesis);GO:0016043(cellular component organization);GO:006…	NA
PC-3p-110122_70	XM_016081021.2	548	569	561	-32.1	-20.9	0.65109	9	2-5,568-565;7-12,564-559;13-21,557-549	1-1,569-569[UP5];6-6,x-x[BULq];x-x,558-558[BULt];22-22,548-548[UP3]	.(((((((((.((((((-((((.&.)))).))))))-))))))))).	UGGUAAAGUUGGACGAG-AUCCA&AGGAUUCUUGUU-AACUUUGCUU	2	79.2048	2	0.998908	Output/R0h/cleaveLand_result/t_plot/PC-3p-110122_70_XM_016081021.2_561_TPlot.pdf	0	0	NA	NA	NA	0	0	NA	NA	NA	79.2048	0	0	3.9892e-35	3.86508e-34	yes	NA	NA
PC-3p-110122_70	XM_016081466.2	234	254	245	-32.1	-22.4	0.697819	8	2-13,253-242;15-21,241-235	1-1,254-254[UP5];14-14,x-x[BULq];22-22,234-234[UP3]	.(((((((-((((((((((((.&.)))))))))))).))))))).	UGGCAGAG-UGAUAGGAAUCUC&AGGAUUCUUGUUAACUUUGCUU	1	39.6024	4	0.998892	Output/R0h/cleaveLand_result/t_plot/PC-3p-110122_70_XM_016081466.2_245_TPlot.pdf	1	32.684	4	0.999728	Output/R8h/cleaveLand_result/t_plot/PC-3p-110122_70_XM_016081466.2_245_TPlot.pdf	3	97.2542	3	0.528496	Output/R24h/cleaveLand_result/t_plot/PC-3p-110122_70_XM_016081466.2_245_TPlot.pdf	39.6024	32.684	97.2542	2.1932e-10	2.43504e-10	yes	GO:0004659(prenyltransferase activity);GO:0043227(membrane-bounded organelle);GO:0009507(chloroplast);GO:0005737(cytoplasm);GO:0043229(intracellular organelle);GO:0003824(catalytic activity);GO:0005623(cell);GO:0044424(intracellular part);GO:0044444(cytoplasmic part);GO:0016765(transferase activity, transferring alkyl or aryl (other than methyl) groups);GO:0009536(plastid);GO:0005622(intracellula…	ko01110(Biosynthesis of secondary metabolites);ko00130(Ubiquinone and other terpenoid-quinone biosynthesis);ko01100(Metabolic pathways)
PC-3p-110122_70	XM_016081532.2	1302	1325	1316	-32.1	-21.6	0.672897	8	2-10,1324-1316;11-19,1313-1305	1-1,1325-1325[UP5];x-x,1315-1314[BULt];20-22,1304-1302[UP3]	...(((((((((..(((((((((.&.)))))))))--)))))))))...	UAACAAAGUUAAGUCAAGAAUCCG&AGGAUUCUUG--UUAACUUUGCUU	1	39.6024	4	0.999998	Output/R0h/cleaveLand_result/t_plot/PC-3p-110122_70_XM_016081532.2_1316_TPlot.pdf	0	0	NA	NA	NA	0	0	NA	NA	NA	39.6024	0	0	6.3194e-18	1.52182e-17	yes	GO:0016772(transferase activity, transferring phosphorus-containing groups);GO:0050789(regulation of biological process);GO:0005488(binding);GO:0031326(regulation of cellular biosynthetic process);GO:2000112(regulation of cellular macromolecule biosynthetic process);GO:0010468(regulation of gene expression);GO:0005524(ATP binding);GO:0036211(protein modification process);GO:0044260(cellular macro…	ko04075(Plant hormone signal transduction);ko04016(MAPK signaling pathway - plant)
PC-3p-110122_70	XM_016081818.2	145	166	157	-32.1	-21.1	0.657321	8.5	2-4,165-163;6-21,161-146	1-1,166-166[UP5];5-5,162-162[SIL];22-22,145-145[UP3]	.((((((((((((((((.(((.&.))).)))))))))))))))).	CAGUGGAGUUAAUGGGAUUCCC&AGGAUUCUUGUUAACUUUGCUU	0	0	NA	NA	NA	1	32.684	4	1	Output/R8h/cleaveLand_result/t_plot/PC-3p-110122_70_XM_016081818.2_157_TPlot.pdf	0	0	NA	NA	NA	0	32.684	0	6.3879e-15	9.59436e-15	yes	NA	ko04016(MAPK signaling pathway - plant);ko04626(Plant-pathogen interaction)
PC-3p-110122_70	XM_016082316.2	2024	2043	2034	-32.1	-21.4	0.666667	7.5	2-16,2042-2028;19-21,2027-2025	1-1,2043-2043[UP5];17-18,x-x[BULq];22-22,2024-2024[UP3]	.(((--(((((((((((((((.&.)))))))))))))))..))).	UAGU--AGUUAACGGGGAUCCA&AGGAUUCUUGUUAACUUUGCUU	1	39.6024	4	1	Output/R0h/cleaveLand_result/t_plot/PC-3p-110122_70_XM_016082316.2_2034_TPlot.pdf	0	0	NA	NA	NA	0	0	NA	NA	NA	39.6024	0	0	6.3194e-18	1.52182e-17	yes	NA	ko03013(RNA transport)
PC-3p-110122_70	XM_016082486.2	1327	1347	1339	-32.1	-22.8	0.71028	10.5	2-8,1346-1340;11-21,1338-1328	1-1,1347-1347[UP5];9-10,1339-1339[AILq];22-22,1327-1327[UP3]	.(((((((((((.-(((((((.&.)))))))..))))))))))).	UGGCGAGGUUGAG-GGAGUCCC&AGGAUUCUUGUUAACUUUGCUU	0	0	NA	NA	NA	0	0	NA	NA	NA	1	32.4181	4	0.99788	Output/R24h/cleaveLand_result/t_plot/PC-3p-110122_70_XM_016082486.2_1339_TPlot.pdf	0	0	32.4181	8.3342e-15	9.59436e-15	yes	GO:0003677(DNA binding);GO:0009987(cellular process);GO:0051301(cell division);GO:0097159(organic cyclic compound binding);GO:0003676(nucleic acid binding);GO:1901363(heterocyclic compound binding);GO:0005488(binding)	ko03040(Spliceosome)
PC-3p-110122_70	XM_016082670.2	500	523	512	-32.1	-25.9	0.806854	6.5	1-3,523-521;4-21,518-501	x-x,520-519[BULt];22-22,500-500[UP3]	.((((((((((((((((((..(((&)))--)))))))))))))))))).	UGGCGAGGUUAACAAGAAUGACCU&AGG--AUUCUUGUUAACUUUGCUU	0	0	NA	NA	NA	0	0	NA	NA	NA	3	97.2542	2	0.209123	Output/R24h/cleaveLand_result/t_plot/PC-3p-110122_70_XM_016082670.2_512_TPlot.pdf	0	0	97.2542	5.7766e-43	9.1307e-42	yes	GO:0003824(catalytic activity);GO:0015399(primary active transmembrane transporter activity);GO:0005773(vacuole);GO:0016817(hydrolase activity, acting on acid anhydrides);GO:0031090(organelle membrane);GO:0005623(cell);GO:0098805(whole membrane);GO:0043227(membrane-bounded organelle);GO:0016462(pyrophosphatase activity);GO:0005794(Golgi apparatus);GO:0016020(membrane);GO:0043492(ATPase activity, …	ko00190(Oxidative phosphorylation);ko04145(Phagosome);ko01100(Metabolic pathways)
PC-3p-110122_70	XM_016083344.2	875	897	888	-32.1	-21.6	0.672897	7	2-5,896-893;7-15,891-883;16-21,881-876	1-1,897-897[UP5];6-6,892-892[SIL];x-x,882-882[BULt];22-22,875-875[UP3]	.((((((.(((((((((.((((.&.)))).)))))))))-)))))).	CAGUAGAUGUUGACAAGUAUCCA&AGGAUUCUUGUUAAC-UUUGCUU	2	79.2048	2	0.981353	Output/R0h/cleaveLand_result/t_plot/PC-3p-110122_70_XM_016083344.2_888_TPlot.pdf	0	0	NA	NA	NA	0	0	NA	NA	NA	79.2048	0	0	3.9892e-35	3.86508e-34	yes	GO:0044464(cell part);GO:0044260(cellular macromolecule metabolic process);GO:0009059(macromolecule biosynthetic process);GO:0005737(cytoplasm);GO:0008152(metabolic process);GO:0043038(amino acid activation);GO:0044238(primary metabolic process);GO:0043043(peptide biosynthetic process);GO:0043039(tRNA aminoacylation);GO:0016874(ligase activity);GO:1901564(organonitrogen compound metabolic process…	ko00970(Aminoacyl-tRNA biosynthesis)
PC-3p-110122_70	XM_016083881.2	2238	2258	2250	-32.1	-21.1	0.657321	9.5	2-6,2257-2253;10-22,2250-2238	1-1,2258-2258[UP5];7-9,2252-2251[AILq]	(((((((((((((..-(((((.&.)))))...)))))))))))))	AAGCGAAGUUGGCCA-AAUCCA&AGGAUUCUUGUUAACUUUGCUU	0	0	NA	NA	NA	1	32.684	4	1	Output/R8h/cleaveLand_result/t_plot/PC-3p-110122_70_XM_016083881.2_2250_TPlot.pdf	0	0	NA	NA	NA	0	32.684	0	6.3879e-15	9.59436e-15	yes	NA	NA
PC-3p-110122_70	XM_016084270.2	318	339	330	-32.1	-26.5	0.825545	6	2-4,338-336;7-22,333-318	1-1,339-339[UP5];5-6,335-334[SIL]	((((((((((((((((..(((.&.)))..))))))))))))))))	GAGCAAGGUUAACAAGCCUCCA&AGGAUUCUUGUUAACUUUGCUU	2	79.2048	3	0.0305497	Output/R0h/cleaveLand_result/t_plot/PC-3p-110122_70_XM_016084270.2_330_TPlot.pdf	0	0	NA	NA	NA	1	32.4181	4	0.396723	Output/R24h/cleaveLand_result/t_plot/PC-3p-110122_70_XM_016084270.2_330_TPlot.pdf	79.2048	0	32.4181	3.1075e-19	1.30585e-18	yes	GO:0003735(structural constituent of ribosome);GO:0043228(non-membrane-bounded organelle);GO:0071704(organic substance metabolic process);GO:0006518(peptide metabolic process);GO:0043232(intracellular non-membrane-bounded organelle);GO:0043043(peptide biosynthetic process);GO:0022625(cytosolic large ribosomal subunit);GO:0022626(cytosolic ribosome);GO:0044237(cellular metabolic process);GO:000519…	ko03010(Ribosome)
PC-3p-110122_70	XM_016085529.1	57	78	69	-32.1	-22.58	0.703427	9	1-11,78-68;15-22,64-57	12-14,67-65[SIL]	((((((((...(((((((((((&)))))))))))...))))))))	GAGCAGAGCCCGCAGGAGUCUU&AGGAUUCUUGUUAACUUUGCUU	0	0	NA	NA	NA	1	32.684	4	0.999193	Output/R8h/cleaveLand_result/t_plot/PC-3p-110122_70_XM_016085529.1_69_TPlot.pdf	1	32.4181	4	0.999373	Output/R24h/cleaveLand_result/t_plot/PC-3p-110122_70_XM_016085529.1_69_TPlot.pdf	0	32.684	32.4181	8.5335e-08	8.81903e-08	yes	GO:0031326(regulation of cellular biosynthetic process);GO:0043231(intracellular membrane-bounded organelle);GO:0051252(regulation of RNA metabolic process);GO:0005488(binding);GO:0044424(intracellular part);GO:0043565(sequence-specific DNA binding);GO:0051171(regulation of nitrogen compound metabolic process);GO:1903506(regulation of nucleic acid-templated transcription);GO:0050794(regulation of…	NA
PC-3p-110122_70	XM_016085670.2	391	413	404	-32.1	-21.8	0.679128	7	2-3,412-411;5-13,409-401;14-20,399-393	1-1,413-413[UP5];4-4,410-410[SIL];x-x,400-400[BULt];21-22,392-391[UP3]	..(((((((.(((((((((.((.&.)).)))))))))-)))))))..	UCGCGAGGUAUAACAAGAAACCA&AGGAUUCUUGUUA-ACUUUGCUU	1	39.6024	4	0.999983	Output/R0h/cleaveLand_result/t_plot/PC-3p-110122_70_XM_016085670.2_404_TPlot.pdf	2	65.368	3	0.730081	Output/R8h/cleaveLand_result/t_plot/PC-3p-110122_70_XM_016085670.2_404_TPlot.pdf	0	0	NA	NA	NA	39.6024	65.368	0	3.4877e-14	3.94452e-14	yes	GO:0043227(membrane-bounded organelle);GO:0003676(nucleic acid binding);GO:0000786(nucleosome);GO:1901363(heterocyclic compound binding);GO:0044815(DNA packaging complex);GO:0046983(protein dimerization activity);GO:0097159(organic cyclic compound binding);GO:0043231(intracellular membrane-bounded organelle);GO:0044424(intracellular part);GO:0043228(non-membrane-bounded organelle);GO:0032991(macr…	NA
PC-3p-110122_70	XM_016086542.2	1576	1598	1589	-32.1	-23.2	0.722741	4.5	1-14,1598-1585;15-22,1583-1576	x-x,1584-1584[BULt]	((((((((.((((((((((((((&))))))))))))))-))))))))	AAGCAAGGAUUAACAAGGAUUUU&AGGAUUCUUGUUAA-CUUUGCUU	3	118.807	2	0.693631	Output/R0h/cleaveLand_result/t_plot/PC-3p-110122_70_XM_016086542.2_1589_TPlot.pdf	0	0	NA	NA	NA	0	0	NA	NA	NA	118.807	0	0	2.5157e-52	6.74078e-51	yes	GO:0006518(peptide metabolic process);GO:0016875(ligase activity, forming carbon-oxygen bonds);GO:0043043(peptide biosynthetic process);GO:0036094(small molecule binding);GO:0044249(cellular biosynthetic process);GO:0043168(anion binding);GO:0009058(biosynthetic process);GO:0043038(amino acid activation);GO:0044281(small molecule metabolic process);GO:1901576(organic substance biosynthetic proces…	ko00970(Aminoacyl-tRNA biosynthesis)
PC-3p-110122_70	XM_016086828.2	251	270	262	-32.1	-22.5	0.700935	6	2-8,269-263;10-17,262-255;19-22,254-251	1-1,270-270[UP5];9-9,x-x[BULq];18-18,x-x[BULq]	((((-((((((((-(((((((.&.))))))).)))))))).))))	GAGC-GAGUUAAC-GGAAUCCG&AGGAUUCUUGUUAACUUUGCUU	3	118.807	2	0.851172	Output/R0h/cleaveLand_result/t_plot/PC-3p-110122_70_XM_016086828.2_262_TPlot.pdf	2	65.368	3	0.52819	Output/R8h/cleaveLand_result/t_plot/PC-3p-110122_70_XM_016086828.2_262_TPlot.pdf	0	0	NA	NA	NA	118.807	65.368	0	8.9414e-26	4.32609e-25	yes	GO:0009813(flavonoid biosynthetic process);GO:0009058(biosynthetic process);GO:0009812(flavonoid metabolic process);GO:0016872(intramolecular lyase activity);GO:0003824(catalytic activity);GO:0045430(chalcone isomerase activity);GO:1901576(organic substance biosynthetic process);GO:0016853(isomerase activity);GO:0008152(metabolic process);GO:0071704(organic substance metabolic process)	ko01100(Metabolic pathways);ko01110(Biosynthesis of secondary metabolites);ko00941(Flavonoid biosynthesis)
PC-3p-110122_70	XM_016087198.2	1609	1630	1620	-32.1	-20.9	0.65109	6.5	1-8,1630-1623;9-17,1621-1613;19-20,1612-1611	x-x,1622-1622[BULt];18-18,x-x[BULq];21-22,1610-1609[UP3]	..((-(((((((((.((((((((&))))))))-))))))))).))..	UUGC-AGGUUAAUACAGAAUCCU&AGGAUUCU-UGUUAACUUUGCUU	0	0	NA	NA	NA	0	0	NA	NA	NA	1	32.4181	4	1	Output/R24h/cleaveLand_result/t_plot/PC-3p-110122_70_XM_016087198.2_1620_TPlot.pdf	0	0	32.4181	8.3342e-15	9.59436e-15	yes	GO:0043167(ion binding);GO:0003676(nucleic acid binding);GO:0046872(metal ion binding);GO:0005488(binding);GO:0097159(organic cyclic compound binding);GO:0043169(cation binding);GO:1901363(heterocyclic compound binding)	NA
PC-3p-110122_70	XM_016087637.2	2197	2221	2212	-32.1	-21.2	0.660436	10.5	2-17,2220-2205;18-21,2201-2198	1-1,2221-2221[UP5];x-x,2204-2202[BULt];22-22,2197-2197[UP3]	.((((...((((((((((((((((.&.))))))))))))))))---)))).	UAGUACUGGGGUUGGCAAGAGUCUC&AGGAUUCUUGUUAACUU---UGCUU	0	0	NA	NA	NA	1	32.684	4	1	Output/R8h/cleaveLand_result/t_plot/PC-3p-110122_70_XM_016087637.2_2212_TPlot.pdf	0	0	NA	NA	NA	0	32.684	0	6.3879e-15	9.59436e-15	yes	GO:2000112(regulation of cellular macromolecule biosynthetic process);GO:0044464(cell part);GO:0051246(regulation of protein metabolic process);GO:0044248(cellular catabolic process);GO:0043228(non-membrane-bounded organelle);GO:0005737(cytoplasm);GO:0019439(aromatic compound catabolic process);GO:0006139(nucleobase-containing compound metabolic process);GO:0043170(macromolecule metabolic process…	ko03018(RNA degradation)
PC-3p-110122_70	XM_016087838.2	1542	1565	1553	-32.1	-20.9	0.65109	9	1-5,1565-1561;6-18,1557-1545;20-22,1544-1542	x-x,1560-1558[BULt];19-19,x-x[BULq]	(((-(((((((((((((...(((((&)))))---))))))))))))).)))	GAG-AAGGUUAACAGGAAAUAUCCU&AGGAU---UCUUGUUAACUUUGCUU	0	0	NA	NA	NA	1	32.684	4	1	Output/R8h/cleaveLand_result/t_plot/PC-3p-110122_70_XM_016087838.2_1553_TPlot.pdf	6	194.508	2	0.99993	Output/R24h/cleaveLand_result/t_plot/PC-3p-110122_70_XM_016087838.2_1553_TPlot.pdf	0	32.684	194.508	6.0851e-63	2.92802e-61	yes	GO:0030880(RNA polymerase complex);GO:0005622(intracellular);GO:1901564(organonitrogen compound metabolic process);GO:0043234(protein complex);GO:0044451(nucleoplasm part);GO:2001141(regulation of RNA biosynthetic process);GO:0008152(metabolic process);GO:0009891(positive regulation of biosynthetic process);GO:0006357(regulation of transcription from RNA polymerase II promoter);GO:0008023(transcr…	NA
PC-3p-110122_70	XM_016087939.2	547	566	559	-32.1	-21.6	0.672897	9.5	2-8,565-559;11-20,558-549	1-1,566-566[UP5];9-10,x-x[BULq];21-22,548-547[UP3]	..((((((((((--(((((((.&.)))))))..))))))))))..	CCGCAAGGUUGA--AGAGUCCG&AGGAUUCUUGUUAACUUUGCUU	2	79.2048	2	0.976715	Output/R0h/cleaveLand_result/t_plot/PC-3p-110122_70_XM_016087939.2_559_TPlot.pdf	0	0	NA	NA	NA	0	0	NA	NA	NA	79.2048	0	0	3.9892e-35	3.86508e-34	yes	GO:0006807(nitrogen compound metabolic process);GO:0010467(gene expression);GO:0003723(RNA binding);GO:0043043(peptide biosynthetic process);GO:0003676(nucleic acid binding);GO:0065007(biological regulation);GO:1901564(organonitrogen compound metabolic process);GO:0044249(cellular biosynthetic process);GO:0043227(membrane-bounded organelle);GO:0009987(cellular process);GO:0044238(primary metaboli…	NA
PC-3p-110122_70	XM_016088321.2	791	813	803	-32.1	-21.4	0.666667	10	2-3,812-811;4-4,809-809;6-8,807-805;10-22,803-791	1-1,813-813[UP5];x-x,810-810[BULt];5-5,808-808[SIL];9-9,804-804[SIL]	(((((((((((((.(((.(.((.&.))-).))).)))))))))))))	AGGCAGAGUUAGCUGGAUUACCA&AGG-AUUCUUGUUAACUUUGCUU	0	0	NA	NA	NA	1	32.684	4	1	Output/R8h/cleaveLand_result/t_plot/PC-3p-110122_70_XM_016088321.2_803_TPlot.pdf	0	0	NA	NA	NA	0	32.684	0	6.3879e-15	9.59436e-15	yes	GO:0004175(endopeptidase activity);GO:0019538(protein metabolic process);GO:0003824(catalytic activity);GO:0044425(membrane part);GO:0006508(proteolysis);GO:0046872(metal ion binding);GO:0070011(peptidase activity, acting on L-amino acid peptides);GO:0016787(hydrolase activity);GO:0034641(cellular nitrogen compound metabolic process);GO:0043170(macromolecule metabolic process);GO:0008237(metallop…	NA
PC-3p-110122_70	XM_016089517.2	567	588	579	-32.1	-21.9	0.682243	6.5	1-3,588-586;5-12,584-577;15-21,574-568	4-4,585-585[SIL];13-14,576-575[SIL];22-22,567-567[UP3]	.(((((((..((((((((.(((&))).))))))))..))))))).	UGGCAAAGAGAACGAGAACCCU&AGGAUUCUUGUUAACUUUGCUU	0	0	NA	NA	NA	0	0	NA	NA	NA	4	129.672	2	0.984895	Output/R24h/cleaveLand_result/t_plot/PC-3p-110122_70_XM_016089517.2_579_TPlot.pdf	0	0	129.672	4.8042e-57	1.62433e-55	yes	GO:0044282(small molecule catabolic process);GO:0009987(cellular process);GO:0071704(organic substance metabolic process);GO:0016790(thiolester hydrolase activity);GO:0006081(cellular aldehyde metabolic process);GO:0016787(hydrolase activity);GO:0006089(lactate metabolic process);GO:1901575(organic substance catabolic process);GO:0008152(metabolic process);GO:0042180(cellular ketone metabolic pro…	ko00620(Pyruvate metabolism)
PC-3p-110122_70	XM_016090846.2	196	216	207	-32.1	-21.2	0.660436	9	2-2,215-215;5-13,212-204;15-22,203-196	1-1,216-216[UP5];3-4,214-213[SIL];14-14,x-x[BULq]	((((((((-(((((((((..(.&.)..))))))))).))))))))	GGGCGAGG-UGACAAGAAGACG&AGGAUUCUUGUUAACUUUGCUU	0	0	NA	NA	NA	1	32.684	4	1	Output/R8h/cleaveLand_result/t_plot/PC-3p-110122_70_XM_016090846.2_207_TPlot.pdf	0	0	NA	NA	NA	0	32.684	0	6.3879e-15	9.59436e-15	yes	GO:0032991(macromolecular complex);GO:0044464(cell part);GO:1990904(ribonucleoprotein complex);GO:0044444(cytoplasmic part);GO:0043229(intracellular organelle);GO:0005623(cell);GO:0030529(intracellular ribonucleoprotein complex);GO:0043226(organelle);GO:0005840(ribosome);GO:0043228(non-membrane-bounded organelle);GO:0005622(intracellular);GO:0043232(intracellular non-membrane-bounded organelle);G…	NA
PC-3p-110122_70	XM_016091670.2	969	990	981	-32.1	-27.6	0.859813	4	1-2,990-989;4-22,987-969	3-3,988-988[SIL]	(((((((((((((((((((.((&)).)))))))))))))))))))	GAGUAAAGUUGACAAGAAUGCU&AGGAUUCUUGUUAACUUUGCUU	1	39.6024	4	0.136819	Output/R0h/cleaveLand_result/t_plot/PC-3p-110122_70_XM_016091670.2_981_TPlot.pdf	0	0	NA	NA	NA	0	0	NA	NA	NA	39.6024	0	0	6.3194e-18	1.52182e-17	yes	NA	ko03440(Homologous recombination)
PC-3p-110122_70	XM_016095903.2	675	698	687	-32.1	-21.2	0.660436	12.5	2-5,697-694;6-19,691-678	1-1,698-698[UP5];x-x,693-692[BULt];20-22,677-675[UP3]	...((((((((((((((..((((.&.))))--))))))))))))))...	CCUCAGAGUUGACGGGAAGGUCCG&AGGAU--UCUUGUUAACUUUGCUU	1	39.6024	4	1	Output/R0h/cleaveLand_result/t_plot/PC-3p-110122_70_XM_016095903.2_687_TPlot.pdf	0	0	NA	NA	NA	3	97.2542	2	0.99939	Output/R24h/cleaveLand_result/t_plot/PC-3p-110122_70_XM_016095903.2_687_TPlot.pdf	39.6024	0	97.2542	1.696e-23	7.69733e-23	yes	GO:0031226(intrinsic component of plasma membrane);GO:0050789(regulation of biological process);GO:0005886(plasma membrane);GO:0007165(signal transduction);GO:0044464(cell part);GO:0006952(defense response);GO:0030054(cell junction);GO:0046658(anchored component of plasma membrane);GO:0050896(response to stimulus);GO:0005911(cell-cell junction);GO:0065007(biological regulation);GO:0016020(membran…	NA
PC-3p-110122_70	XM_016096360.2	1173	1200	1191	-32.1	-21.6	0.672897	19.5	2-8,1199-1193;10-11,1191-1190;12-22,1183-1173	1-1,1200-1200[UP5];9-9,1192-1192[SIL];x-x,1189-1184[BULt]	(((((((((((......((.(((((((.&.))))))).))------)))))))))))	GAGCGGAGUUGGAGGAAGCCGGAAUCCG&AGGAUUCUUGU------UAACUUUGCUU	0	0	NA	NA	NA	1	32.684	4	1	Output/R8h/cleaveLand_result/t_plot/PC-3p-110122_70_XM_016096360.2_1191_TPlot.pdf	0	0	NA	NA	NA	0	32.684	0	6.3879e-15	9.59436e-15	yes	NA	NA
PC-3p-110122_70	XM_016096535.2	608	630	621	-32.1	-22.7	0.707165	5	1-12,630-619;14-15,617-616;17-22,613-608	13-13,618-618[SIL];16-16,615-614[AILt]	((((((..((.((((((((((((&)))))))))))).))-.))))))	AAGCAAUUGUAGAUAAGAAUCCU&AGGAUUCUUGUUAAC-UUUGCUU	0	0	NA	NA	NA	1	32.684	4	0.99843	Output/R8h/cleaveLand_result/t_plot/PC-3p-110122_70_XM_016096535.2_621_TPlot.pdf	0	0	NA	NA	NA	0	32.684	0	6.3879e-15	9.59436e-15	yes	GO:0098796(membrane protein complex);GO:0031982(vesicle);GO:0042886(amide transport);GO:0005798(Golgi-associated vesicle);GO:0030660(Golgi-associated vesicle membrane);GO:0030663(COPI-coated vesicle membrane);GO:0030126(COPI vesicle coat);GO:0005198(structural molecule activity);GO:0071702(organic substance transport);GO:0006886(intracellular protein transport);GO:0043234(protein complex);GO:0071…	NA
PC-3p-110122_70	XM_016097141.2	1595	1617	1608	-32.1	-21.6	0.672897	9	3-10,1615-1608;11-16,1606-1601;18-22,1599-1595	1-2,1617-1616[UP5];x-x,1607-1607[BULt];17-17,1600-1600[SIL]	(((((.((((((.((((((((..&..))))))))-)))))).)))))	AGGCAUGGUUGAUCGAGAAUCAU&AGGAUUCUUG-UUAACUUUGCUU	0	0	NA	NA	NA	2	65.368	2	0.995042	Output/R8h/cleaveLand_result/t_plot/PC-3p-110122_70_XM_016097141.2_1608_TPlot.pdf	0	0	NA	NA	NA	0	65.368	0	4.0777e-29	2.60335e-28	yes	GO:0000166(nucleotide binding);GO:0016628(oxidoreductase activity, acting on the CH-CH group of donors, NAD or NADP as acceptor);GO:0048037(cofactor binding);GO:0016021(integral component of membrane);GO:0043168(anion binding);GO:0016020(membrane);GO:1901265(nucleoside phosphate binding);GO:0005488(binding);GO:0008202(steroid metabolic process);GO:0016614(oxidoreductase activity, acting on CH-OH …	ko01100(Metabolic pathways);ko01110(Biosynthesis of secondary metabolites);ko00100(Steroid biosynthesis)
PC-3p-110122_70	XM_016097900.2	1247	1271	1262	-32.1	-22.4	0.697819	5.5	2-13,1270-1259;14-16,1257-1255;17-21,1252-1248	1-1,1271-1271[UP5];x-x,1258-1258[BULt];x-x,1254-1253[BULt];22-22,1247-1247[UP3]	.(((((..(((.((((((((((((.&.))))))))))))-)))--))))).	CAGCGAUCAGUGUAACAAGAAUCCC&AGGAUUCUUGUUA-ACU--UUGCUU	0	0	NA	NA	NA	0	0	NA	NA	NA	1	32.4181	4	0.999806	Output/R24h/cleaveLand_result/t_plot/PC-3p-110122_70_XM_016097900.2_1262_TPlot.pdf	0	0	32.4181	8.3342e-15	9.59436e-15	yes	NA	NA
PC-3p-110122_70	XM_016097901.2	1216	1240	1231	-32.1	-22.4	0.697819	5.5	2-13,1239-1228;14-16,1226-1224;17-21,1221-1217	1-1,1240-1240[UP5];x-x,1227-1227[BULt];x-x,1223-1222[BULt];22-22,1216-1216[UP3]	.(((((..(((.((((((((((((.&.))))))))))))-)))--))))).	CAGCGAUCAGUGUAACAAGAAUCCC&AGGAUUCUUGUUA-ACU--UUGCUU	0	0	NA	NA	NA	0	0	NA	NA	NA	2	64.8361	2	0.948137	Output/R24h/cleaveLand_result/t_plot/PC-3p-110122_70_XM_016097901.2_1231_TPlot.pdf	0	0	64.8361	6.941e-29	3.45403e-28	yes	NA	NA
PC-3p-110122_70	XM_016099306.2	1864	1885	1876	-32.1	-27.6	0.859813	4	1-2,1885-1884;4-22,1882-1864	3-3,1883-1883[SIL]	(((((((((((((((((((.((&)).)))))))))))))))))))	GAGUAAAGUUGACAAGAAUGCU&AGGAUUCUUGUUAACUUUGCUU	0	0	NA	NA	NA	0	0	NA	NA	NA	2	64.8361	1	0.00223066	Output/R24h/cleaveLand_result/t_plot/PC-3p-110122_70_XM_016099306.2_1876_TPlot.pdf	0	0	64.8361	6.941e-29	3.45403e-28	yes	GO:0003677(DNA binding);GO:0043232(intracellular non-membrane-bounded organelle);GO:0005524(ATP binding);GO:0097159(organic cyclic compound binding);GO:0004003(ATP-dependent DNA helicase activity);GO:0043140(ATP-dependent 3'-5' DNA helicase activity);GO:0006139(nucleobase-containing compound metabolic process);GO:0035639(purine ribonucleoside triphosphate binding);GO:0043170(macromolecule metabol…	ko03440(Homologous recombination)
PC-3p-110122_70	XM_016100048.2	1786	1807	1798	-32.1	-25.8	0.803738	6.5	1-21,1807-1787	22-22,1786-1786[UP3]	.(((((((((((((((((((((&))))))))))))))))))))).	CAGCGAAGUUGAUGGGAAUCUU&AGGAUUCUUGUUAACUUUGCUU	0	0	NA	NA	NA	1	32.684	4	0.519137	Output/R8h/cleaveLand_result/t_plot/PC-3p-110122_70_XM_016100048.2_1798_TPlot.pdf	0	0	NA	NA	NA	0	32.684	0	6.3879e-15	9.59436e-15	yes	GO:0005515(protein binding);GO:0043168(anion binding);GO:0031406(carboxylic acid binding);GO:0046983(protein dimerization activity);GO:0036094(small molecule binding);GO:0043167(ion binding);GO:0005488(binding);GO:0008152(metabolic process);GO:0043177(organic acid binding);GO:0016597(amino acid binding)	ko01110(Biosynthesis of secondary metabolites);ko04016(MAPK signaling pathway - plant);ko01100(Metabolic pathways);ko00860(Porphyrin and chlorophyll metabolism);ko04075(Plant hormone signal transduction)
PC-3p-110122_70	XM_016100282.2	2373	2393	2385	-32.1	-21.8	0.679128	8	2-9,2392-2385;11-22,2384-2373	1-1,2393-2393[UP5];10-10,x-x[BULq]	((((((((((((-((((((((.&.)))))))).))))))))))))	AGGCAAGGUUAG-AGGAGUUCA&AGGAUUCUUGUUAACUUUGCUU	0	0	NA	NA	NA	1	32.684	4	0.999998	Output/R8h/cleaveLand_result/t_plot/PC-3p-110122_70_XM_016100282.2_2385_TPlot.pdf	0	0	NA	NA	NA	0	32.684	0	6.3879e-15	9.59436e-15	yes	GO:0005509(calcium ion binding);GO:0016491(oxidoreductase activity);GO:0016020(membrane);GO:0043169(cation binding);GO:0005488(binding);GO:0098754(detoxification);GO:0016651(oxidoreductase activity, acting on NAD(P)H);GO:0098869(cellular oxidant detoxification);GO:0004601(peroxidase activity);GO:0050896(response to stimulus);GO:0042221(response to chemical);GO:0046872(metal ion binding);GO:001668…	ko04626(Plant-pathogen interaction);ko04016(MAPK signaling pathway - plant)
PC-3p-110122_70	XM_016101237.2	1813	1831	1823	-32.1	-21.2	0.660436	9	2-8,1830-1824;10-11,1823-1822;14-22,1821-1813	1-1,1831-1831[UP5];9-9,x-x[BULq];12-13,x-x[BULq]	(((((((((--((-(((((((.&.))))))).))..)))))))))	GAGCAAGGU--GC-AGAGUCCG&AGGAUUCUUGUUAACUUUGCUU	0	0	NA	NA	NA	1	32.684	4	1	Output/R8h/cleaveLand_result/t_plot/PC-3p-110122_70_XM_016101237.2_1823_TPlot.pdf	0	0	NA	NA	NA	0	32.684	0	6.3879e-15	9.59436e-15	yes	GO:0031224(intrinsic component of membrane);GO:0006796(phosphate-containing compound metabolic process);GO:0043170(macromolecule metabolic process);GO:0044238(primary metabolic process);GO:0009987(cellular process);GO:0005524(ATP binding);GO:1901564(organonitrogen compound metabolic process);GO:0032555(purine ribonucleotide binding);GO:0005488(binding);GO:0030554(adenyl nucleotide binding);GO:001…	NA
PC-3p-110122_70	XM_016101943.2	325	345	337	-32.1	-22.1	0.688474	7	2-5,344-341;7-12,340-335;15-21,332-326	1-1,345-345[UP5];6-6,x-x[BULq];13-14,334-333[SIL];22-22,325-325[UP3]	.(((((((..((((((-((((.&.)))).))))))..))))))).	CGGCAAGGGCAACAAG-AUCCG&AGGAUUCUUGUUAACUUUGCUU	4	158.41	2	0.922289	Output/R0h/cleaveLand_result/t_plot/PC-3p-110122_70_XM_016101943.2_337_TPlot.pdf	4	130.736	2	0.96803	Output/R8h/cleaveLand_result/t_plot/PC-3p-110122_70_XM_016101943.2_337_TPlot.pdf	5	162.09	2	0.969234	Output/R24h/cleaveLand_result/t_plot/PC-3p-110122_70_XM_016101943.2_337_TPlot.pdf	158.41	130.736	162.09	0.14182	0.142933	yes	GO:0016020(membrane);GO:0044425(membrane part);GO:0016021(integral component of membrane);GO:0031224(intrinsic component of membrane)	ko00190(Oxidative phosphorylation);ko01100(Metabolic pathways)
PC-3p-110122_70	XM_016102412.2	874	897	888	-32.1	-24.2	0.753894	6	2-18,896-880;19-22,877-874	1-1,897-897[UP5];x-x,879-878[BULt]	((((..(((((((((((((((((.&.)))))))))))))))))--))))	AAGCUGAAAGUUGGCAAGAAUCUG&AGGAUUCUUGUUAACUUU--GCUU	0	0	NA	NA	NA	1	32.684	4	0.844904	Output/R8h/cleaveLand_result/t_plot/PC-3p-110122_70_XM_016102412.2_888_TPlot.pdf	0	0	NA	NA	NA	0	32.684	0	6.3879e-15	9.59436e-15	yes	GO:0003824(catalytic activity);GO:0008152(metabolic process)	ko01110(Biosynthesis of secondary metabolites);ko00130(Ubiquinone and other terpenoid-quinone biosynthesis);ko01100(Metabolic pathways)
PC-3p-110122_70	XM_016103212.2	100	124	115	-32.1	-21.8	0.679128	8.5	2-3,123-122;5-15,120-110;16-22,106-100	1-1,124-124[UP5];4-4,121-121[SIL];x-x,109-107[BULt]	(((((((...(((((((((((.((.&.)).)))))))))))---)))))))	GAGCGAGCCCGUUAGCAAGAAGCCG&AGGAUUCUUGUUAAC---UUUGCUU	1	39.6024	4	0.999978	Output/R0h/cleaveLand_result/t_plot/PC-3p-110122_70_XM_016103212.2_115_TPlot.pdf	0	0	NA	NA	NA	1	32.4181	4	0.999998	Output/R24h/cleaveLand_result/t_plot/PC-3p-110122_70_XM_016103212.2_115_TPlot.pdf	39.6024	0	32.4181	8.8481e-09	9.41666e-09	yes	GO:0031224(intrinsic component of membrane);GO:0016020(membrane);GO:0044425(membrane part);GO:0016021(integral component of membrane)	NA
PC-3p-110122_70	XM_016103562.2	841	861	852	-32.1	-22.1	0.688474	7.5	1-7,861-855;10-12,852-850;15-22,848-841	8-9,854-853[SIL];13-14,849-849[AILq]	((((((((.-(((..(((((((&)))))))..)))..))))))))	AAGCAAGGG-AACUUGAGUCCU&AGGAUUCUUGUUAACUUUGCUU	2	79.2048	2	0.927702	Output/R0h/cleaveLand_result/t_plot/PC-3p-110122_70_XM_016103562.2_852_TPlot.pdf	0	0	NA	NA	NA	0	0	NA	NA	NA	79.2048	0	0	3.9892e-35	3.86508e-34	yes	GO:0031325(positive regulation of cellular metabolic process);GO:0019222(regulation of metabolic process);GO:0009057(macromolecule catabolic process);GO:0045899(positive regulation of RNA polymerase II transcriptional preinitiation complex assembly);GO:0060255(regulation of macromolecule metabolic process);GO:1903362(regulation of cellular protein catabolic process);GO:0003824(catalytic activity)…	ko04141(Protein processing in endoplasmic reticulum)
PC-3p-110122_70	XM_016103986.2	654	675	666	-32.1	-21.2	0.660436	7	1-2,675-674;4-19,672-657	3-3,673-673[SIL];20-22,656-654[UP3]	...((((((((((((((((.((&)).))))))))))))))))...	UUCCAAAGUUAGCAAGAAUGUU&AGGAUUCUUGUUAACUUUGCUU	1	39.6024	4	1	Output/R0h/cleaveLand_result/t_plot/PC-3p-110122_70_XM_016103986.2_666_TPlot.pdf	0	0	NA	NA	NA	0	0	NA	NA	NA	39.6024	0	0	6.3194e-18	1.52182e-17	yes	NA	NA
PC-3p-110122_70	XM_016105061.2	634	657	646	-32.1	-26	0.809969	6.5	1-3,657-655;4-21,652-635	x-x,654-653[BULt];22-22,634-634[UP3]	.((((((((((((((((((..(((&)))--)))))))))))))))))).	CGGCGAGGUUAACAAGAAUGACCU&AGG--AUUCUUGUUAACUUUGCUU	2	79.2048	2	0.139252	Output/R0h/cleaveLand_result/t_plot/PC-3p-110122_70_XM_016105061.2_646_TPlot.pdf	0	0	NA	NA	NA	0	0	NA	NA	NA	79.2048	0	0	3.9892e-35	3.86508e-34	yes	GO:0043492(ATPase activity, coupled to movement of substances);GO:0043229(intracellular organelle);GO:0051234(establishment of localization);GO:0017111(nucleoside-triphosphatase activity);GO:0042623(ATPase activity, coupled);GO:0043231(intracellular membrane-bounded organelle);GO:0044422(organelle part);GO:0098805(whole membrane);GO:0044437(vacuolar part);GO:0044464(cell part);GO:0005773(vacuole)…	ko04145(Phagosome);ko01100(Metabolic pathways);ko00190(Oxidative phosphorylation)
PC-3p-110122_70	XM_016105066.2	400	423	412	-32.1	-26	0.809969	6.5	1-3,423-421;4-21,418-401	x-x,420-419[BULt];22-22,400-400[UP3]	.((((((((((((((((((..(((&)))--)))))))))))))))))).	CGGCGAGGUUAACAAGAAUGACCU&AGG--AUUCUUGUUAACUUUGCUU	1	39.6024	4	0.402473	Output/R0h/cleaveLand_result/t_plot/PC-3p-110122_70_XM_016105066.2_412_TPlot.pdf	0	0	NA	NA	NA	0	0	NA	NA	NA	39.6024	0	0	6.3194e-18	1.52182e-17	yes	GO:0043492(ATPase activity, coupled to movement of substances);GO:0043229(intracellular organelle);GO:0051234(establishment of localization);GO:0017111(nucleoside-triphosphatase activity);GO:0042623(ATPase activity, coupled);GO:0043231(intracellular membrane-bounded organelle);GO:0044422(organelle part);GO:0098805(whole membrane);GO:0044437(vacuolar part);GO:0044464(cell part);GO:0005773(vacuole)…	ko04145(Phagosome);ko01100(Metabolic pathways);ko00190(Oxidative phosphorylation)
PC-3p-110122_70	XM_016105930.2	1381	1402	1393	-32.1	-23.5	0.732087	9	2-2,1401-1401;5-21,1398-1382	1-1,1402-1402[UP5];3-4,1400-1399[SIL];22-22,1381-1381[UP3]	.(((((((((((((((((..(.&.)..))))))))))))))))).	UGGCAAGGUUAACAGGAGCACA&AGGAUUCUUGUUAACUUUGCUU	0	0	NA	NA	NA	1	32.684	4	0.967903	Output/R8h/cleaveLand_result/t_plot/PC-3p-110122_70_XM_016105930.2_1393_TPlot.pdf	0	0	NA	NA	NA	0	32.684	0	6.3879e-15	9.59436e-15	yes	GO:0016021(integral component of membrane);GO:0031224(intrinsic component of membrane);GO:0044425(membrane part);GO:0016020(membrane)	ko03013(RNA transport);ko03008(Ribosome biogenesis in eukaryotes)
PC-3p-110122_70	XM_016105931.2	1386	1407	1398	-32.1	-23.5	0.732087	9	2-2,1406-1406;5-21,1403-1387	1-1,1407-1407[UP5];3-4,1405-1404[SIL];22-22,1386-1386[UP3]	.(((((((((((((((((..(.&.)..))))))))))))))))).	UGGCAAGGUUAACAGGAGCACA&AGGAUUCUUGUUAACUUUGCUU	1	39.6024	4	0.925218	Output/R0h/cleaveLand_result/t_plot/PC-3p-110122_70_XM_016105931.2_1398_TPlot.pdf	3	98.052	2	0.651927	Output/R8h/cleaveLand_result/t_plot/PC-3p-110122_70_XM_016105931.2_1398_TPlot.pdf	0	0	NA	NA	NA	39.6024	98.052	0	9.3205e-24	4.28717e-23	yes	GO:0016021(integral component of membrane);GO:0031224(intrinsic component of membrane);GO:0044425(membrane part);GO:0016020(membrane)	ko03013(RNA transport);ko03008(Ribosome biogenesis in eukaryotes)
PC-3p-110122_70	XM_016105946.2	632	654	644	-32.1	-22.4	0.697819	13.5	2-9,653-646;14-22,640-632	1-1,654-654[UP5];10-13,645-641[AILt]	(((((((((.....((((((((.&.))))))))-....)))))))))	GAGCGAGGUGUUAAGAGAGUCCG&AGGAUUCUU-GUUAACUUUGCUU	2	79.2048	3	0.414034	Output/R0h/cleaveLand_result/t_plot/PC-3p-110122_70_XM_016105946.2_644_TPlot.pdf	2	65.368	3	0.563959	Output/R8h/cleaveLand_result/t_plot/PC-3p-110122_70_XM_016105946.2_644_TPlot.pdf	0	0	NA	NA	NA	79.2048	65.368	0	7.4316e-17	1.77155e-16	yes	GO:0043167(ion binding);GO:0071704(organic substance metabolic process);GO:0004619(phosphoglycerate mutase activity);GO:0044424(intracellular part);GO:0008152(metabolic process);GO:1901575(organic substance catabolic process);GO:0044282(small molecule catabolic process);GO:0016868(intramolecular transferase activity, phosphotransferases);GO:0046914(transition metal ion binding);GO:0009056(catabol…	ko01230(Biosynthesis of amino acids);ko01110(Biosynthesis of secondary metabolites);ko00260(Glycine, serine and threonine metabolism);ko01200(Carbon metabolism);ko00010(Glycolysis / Gluconeogenesis);ko01100(Metabolic pathways)
PC-3p-110122_70	XM_016105947.2	632	654	644	-32.1	-22.4	0.697819	13.5	2-9,653-646;14-22,640-632	1-1,654-654[UP5];10-13,645-641[AILt]	(((((((((.....((((((((.&.))))))))-....)))))))))	GAGCGAGGUGUUAAGAGAGUCCG&AGGAUUCUU-GUUAACUUUGCUU	4	158.41	2	0.868289	Output/R0h/cleaveLand_result/t_plot/PC-3p-110122_70_XM_016105947.2_644_TPlot.pdf	3	98.052	2	0.934906	Output/R8h/cleaveLand_result/t_plot/PC-3p-110122_70_XM_016105947.2_644_TPlot.pdf	0	0	NA	NA	NA	158.41	98.052	0	3.3527e-33	3.06272e-32	yes	GO:0043167(ion binding);GO:0071704(organic substance metabolic process);GO:0004619(phosphoglycerate mutase activity);GO:0044424(intracellular part);GO:0008152(metabolic process);GO:1901575(organic substance catabolic process);GO:0044282(small molecule catabolic process);GO:0016868(intramolecular transferase activity, phosphotransferases);GO:0046914(transition metal ion binding);GO:0009056(catabol…	ko01230(Biosynthesis of amino acids);ko01110(Biosynthesis of secondary metabolites);ko00260(Glycine, serine and threonine metabolism);ko01200(Carbon metabolism);ko00010(Glycolysis / Gluconeogenesis);ko01100(Metabolic pathways)
PC-3p-110122_70	XM_016107246.2	648	670	661	-32.1	-22.32	0.695327	9	1-11,670-660;15-22,655-648	12-14,659-656[AILt]	((((((((....(((((((((((&)))))))))))-...))))))))	AGGUAGGGAGAUACAAGAGUCCU&AGGAUUCUUGU-UAACUUUGCUU	0	0	NA	NA	NA	0	0	NA	NA	NA	1	32.4181	4	0.999895	Output/R24h/cleaveLand_result/t_plot/PC-3p-110122_70_XM_016107246.2_661_TPlot.pdf	0	0	32.4181	8.3342e-15	9.59436e-15	yes	GO:1901566(organonitrogen compound biosynthetic process);GO:0016866(intramolecular transferase activity);GO:0044238(primary metabolic process);GO:1901564(organonitrogen compound metabolic process);GO:0006807(nitrogen compound metabolic process);GO:0046394(carboxylic acid biosynthetic process);GO:0043648(dicarboxylic acid metabolic process);GO:0009073(aromatic amino acid family biosynthetic proces…	ko01110(Biosynthesis of secondary metabolites);ko00400(Phenylalanine, tyrosine and tryptophan biosynthesis);ko01230(Biosynthesis of amino acids);ko01100(Metabolic pathways)
PC-3p-110122_70	XM_016107966.2	1031	1051	1042	-32.1	-21	0.654206	8.5	2-12,1050-1040;15-19,1038-1034	1-1,1051-1051[UP5];13-14,1039-1039[AILq];20-22,1033-1031[UP3]	...(((((.-(((((((((((.&.)))))))))))..)))))...	UCACAGAGG-AGCAAGAGUCCA&AGGAUUCUUGUUAACUUUGCUU	1	39.6024	4	1	Output/R0h/cleaveLand_result/t_plot/PC-3p-110122_70_XM_016107966.2_1042_TPlot.pdf	0	0	NA	NA	NA	2	64.8361	2	0.999859	Output/R24h/cleaveLand_result/t_plot/PC-3p-110122_70_XM_016107966.2_1042_TPlot.pdf	39.6024	0	64.8361	4.7251e-14	5.31115e-14	yes	GO:0046914(transition metal ion binding);GO:0008152(metabolic process);GO:0043169(cation binding);GO:0046872(metal ion binding);GO:0044425(membrane part);GO:0046906(tetrapyrrole binding);GO:0043167(ion binding);GO:0016705(oxidoreductase activity, acting on paired donors, with incorporation or reduction of molecular oxygen);GO:0004497(monooxygenase activity);GO:0020037(heme binding);GO:0016491(oxi…	ko00906(Carotenoid biosynthesis)
PC-3p-110122_70	XM_016108166.2	1130	1151	1142	-32.1	-22.1	0.688474	5	1-2,1151-1150;4-12,1148-1140;14-22,1138-1130	3-3,1149-1149[SIL];13-13,1139-1139[SIL]	(((((((((.(((((((((.((&)).))))))))).)))))))))	AAGUGAAGUGAACAAGAGUGCU&AGGAUUCUUGUUAACUUUGCUU	0	0	NA	NA	NA	1	32.684	4	0.999965	Output/R8h/cleaveLand_result/t_plot/PC-3p-110122_70_XM_016108166.2_1142_TPlot.pdf	0	0	NA	NA	NA	0	32.684	0	6.3879e-15	9.59436e-15	yes	GO:0044424(intracellular part);GO:0000003(reproduction);GO:0035825(homologous recombination);GO:0006139(nucleobase-containing compound metabolic process);GO:0071704(organic substance metabolic process);GO:0051304(chromosome separation);GO:0033554(cellular response to stress);GO:0050896(response to stimulus);GO:0044464(cell part);GO:0097159(organic cyclic compound binding);GO:0006996(organelle org…	ko03420(Nucleotide excision repair)
PC-3p-110122_70	XM_016108342.2	2085	2105	2096	-32.1	-21	0.654206	5.5	2-2,2104-2104;4-12,2102-2094;15-22,2092-2085	1-1,2105-2105[UP5];3-3,2103-2103[SIL];13-14,2093-2093[AILq]	((((((((.-(((((((((.(.&.).)))))))))..))))))))	AAGCAGAGA-AACAAGAAUGCA&AGGAUUCUUGUUAACUUUGCUU	0	0	NA	NA	NA	1	32.684	4	1	Output/R8h/cleaveLand_result/t_plot/PC-3p-110122_70_XM_016108342.2_2096_TPlot.pdf	1	32.4181	4	1	Output/R24h/cleaveLand_result/t_plot/PC-3p-110122_70_XM_016108342.2_2096_TPlot.pdf	0	32.684	32.4181	8.5335e-08	8.81903e-08	yes	GO:0016021(integral component of membrane);GO:0043492(ATPase activity, coupled to movement of substances);GO:0035639(purine ribonucleoside triphosphate binding);GO:0070838(divalent metal ion transport);GO:0005887(integral component of plasma membrane);GO:0034220(ion transmembrane transport);GO:0022804(active transmembrane transporter activity);GO:0070588(calcium ion transmembrane transport);GO:00…	NA
PC-3p-110122_70	XM_016108554.2	459	483	475	-32.1	-21.8	0.679128	8	1-3,483-481;5-14,480-471;15-22,466-459	4-4,x-x[BULq];x-x,470-467[BULt]	((((((((....((((((((((-(((&))).))))))))))----))))))))	GAGCAAGGGAAUUUAGCAAGAA-CCU&AGGAUUCUUGUUAA----CUUUGCUU	0	0	NA	NA	NA	2	65.368	2	0.989038	Output/R8h/cleaveLand_result/t_plot/PC-3p-110122_70_XM_016108554.2_475_TPlot.pdf	0	0	NA	NA	NA	0	65.368	0	4.0777e-29	2.60335e-28	yes	GO:0043227(membrane-bounded organelle);GO:0043229(intracellular organelle);GO:0043226(organelle);GO:0016020(membrane);GO:0044464(cell part);GO:0043231(intracellular membrane-bounded organelle);GO:0044424(intracellular part);GO:0012505(endomembrane system);GO:0031224(intrinsic component of membrane);GO:0044444(cytoplasmic part);GO:0044425(membrane part);GO:0005737(cytoplasm);GO:0005794(Golgi appar…	ko00040(Pentose and glucuronate interconversions);ko01100(Metabolic pathways)
PC-3p-110122_70	XM_016109136.2	1097	1117	1108	-32.1	-25.1	0.781931	4	1-13,1117-1105;15-18,1104-1101;20-22,1099-1097	14-14,x-x[BULq];19-19,1100-1100[SIL]	(((.((((-(((((((((((((&))))))))))))).)))).)))	GAGGGAAG-UAGCAAGAAUCCU&AGGAUUCUUGUUAACUUUGCUU	0	0	NA	NA	NA	2	65.368	2	0.241896	Output/R8h/cleaveLand_result/t_plot/PC-3p-110122_70_XM_016109136.2_1108_TPlot.pdf	0	0	NA	NA	NA	0	65.368	0	4.0777e-29	2.60335e-28	yes	GO:0032555(purine ribonucleotide binding);GO:0072524(pyridine-containing compound metabolic process);GO:0043167(ion binding);GO:0046496(nicotinamide nucleotide metabolic process);GO:0055082(cellular chemical homeostasis);GO:0019637(organophosphate metabolic process);GO:0055086(nucleobase-containing small molecule metabolic process);GO:0016773(phosphotransferase activity, alcohol group as acceptor…	ko00500(Starch and sucrose metabolism);ko00052(Galactose metabolism);ko01100(Metabolic pathways);ko00051(Fructose and mannose metabolism);ko00010(Glycolysis / Gluconeogenesis);ko00520(Amino sugar and nucleotide sugar metabolism);ko01110(Biosynthesis of secondary metabolites);ko01200(Carbon metabolism)
PC-3p-110122_70	XM_016109308.2	2476	2499	2490	-32.1	-21.24	0.661682	13	2-10,2498-2490;15-21,2483-2477	1-1,2499-2499[UP5];11-14,2489-2484[AILt];22-22,2476-2476[UP3]	.(((((((......(((((((((.&.)))))))))--....))))))).	CAGCAAAGAAAUUUCAAGAGUCCA&AGGAUUCUUG--UUAACUUUGCUU	0	0	NA	NA	NA	4	130.736	2	0.999073	Output/R8h/cleaveLand_result/t_plot/PC-3p-110122_70_XM_016109308.2_2490_TPlot.pdf	0	0	NA	NA	NA	0	130.736	0	1.658e-57	6.39043e-56	yes	NA	NA
PC-3p-110122_70	XM_016110193.2	800	821	812	-32.1	-22.48	0.700312	9	2-15,820-807;19-21,803-801	1-1,821-821[UP5];16-18,806-804[SIL];22-22,800-800[UP3]	.(((...((((((((((((((.&.))))))))))))))...))).	UGGUUAUGUUGGCAAGAGUCCA&AGGAUUCUUGUUAACUUUGCUU	0	0	NA	NA	NA	0	0	NA	NA	NA	1	32.4181	4	0.999744	Output/R24h/cleaveLand_result/t_plot/PC-3p-110122_70_XM_016110193.2_812_TPlot.pdf	0	0	32.4181	8.3342e-15	9.59436e-15	yes	GO:0016020(membrane);GO:0031224(intrinsic component of membrane);GO:0044425(membrane part);GO:0016021(integral component of membrane)	NA
PC-3p-110122_70	XM_016111589.2	857	878	870	-32.1	-21.2	0.660436	8.5	1-3,878-876;5-9,875-871;11-14,869-866;15-22,864-857	4-4,x-x[BULq];10-10,870-870[SIL];x-x,865-865[BULt]	((((((((.((((.(((((-(((&))).))))).))))-))))))))	GAGCAAAGUUUGAGGAGGA-CCU&AGGAUUCUUGUUAA-CUUUGCUU	1	39.6024	4	1	Output/R0h/cleaveLand_result/t_plot/PC-3p-110122_70_XM_016111589.2_870_TPlot.pdf	0	0	NA	NA	NA	0	0	NA	NA	NA	39.6024	0	0	6.3194e-18	1.52182e-17	yes	GO:1901265(nucleoside phosphate binding);GO:0008152(metabolic process);GO:0016491(oxidoreductase activity);GO:0036094(small molecule binding);GO:0005488(binding);GO:0003824(catalytic activity);GO:0097159(organic cyclic compound binding);GO:0048037(cofactor binding);GO:0055114(oxidation-reduction process);GO:0000166(nucleotide binding);GO:0016614(oxidoreductase activity, acting on CH-OH group of d…	ko01200(Carbon metabolism);ko00630(Glyoxylate and dicarboxylate metabolism);ko01100(Metabolic pathways)
PC-3p-110122_70	XM_016112239.1	1752	1774	1764	-32.1	-22.5	0.700935	8	1-8,1774-1767;9-21,1765-1753	x-x,1766-1766[BULt];22-22,1752-1752[UP3]	.(((((((((((((.((((((((&))))))))-))))))))))))).	CAGUGAAGUUGACAGGGGAUCUU&AGGAUUCU-UGUUAACUUUGCUU	1	39.6024	4	0.998339	Output/R0h/cleaveLand_result/t_plot/PC-3p-110122_70_XM_016112239.1_1764_TPlot.pdf	1	32.684	4	0.999557	Output/R8h/cleaveLand_result/t_plot/PC-3p-110122_70_XM_016112239.1_1764_TPlot.pdf	0	0	NA	NA	NA	39.6024	32.684	0	8.6245e-09	9.35023e-09	yes	GO:0042651(thylakoid membrane);GO:0016020(membrane);GO:0042221(response to chemical);GO:0044436(thylakoid part);GO:0006950(response to stress);GO:0000304(response to singlet oxygen);GO:0005623(cell);GO:0009579(thylakoid);GO:1901700(response to oxygen-containing compound);GO:0044464(cell part);GO:0050896(response to stimulus);GO:0044424(intracellular part);GO:0000302(response to reactive oxygen sp…	ko03018(RNA degradation)
PC-3p-110122_70	XM_016113208.2	307	328	319	-32.1	-26.4	0.82243	6	2-4,327-325;7-22,322-307	1-1,328-328[UP5];5-6,324-323[SIL]	((((((((((((((((..(((.&.)))..))))))))))))))))	GAGCAAGGUUAACAAGCCUCCG&AGGAUUCUUGUUAACUUUGCUU	2	79.2048	3	0.0319159	Output/R0h/cleaveLand_result/t_plot/PC-3p-110122_70_XM_016113208.2_319_TPlot.pdf	0	0	NA	NA	NA	1	32.4181	4	0.410423	Output/R24h/cleaveLand_result/t_plot/PC-3p-110122_70_XM_016113208.2_319_TPlot.pdf	79.2048	0	32.4181	3.1075e-19	1.30585e-18	yes	GO:0009058(biosynthetic process);GO:0009987(cellular process);GO:0006518(peptide metabolic process);GO:0043603(cellular amide metabolic process);GO:0010467(gene expression);GO:1901564(organonitrogen compound metabolic process);GO:0043228(non-membrane-bounded organelle);GO:0030529(intracellular ribonucleoprotein complex);GO:0044237(cellular metabolic process);GO:0032991(macromolecular complex);GO:…	ko03010(Ribosome)
PC-3p-110122_70	XM_016114359.2	1087	1111	1100	-32.1	-21.2	0.660436	10.5	1-8,1111-1104;9-12,1101-1098;14-22,1095-1087	x-x,1103-1102[BULt];13-13,1097-1096[AILt]	(((((((((..((((..((((((((&))))))))--))))-.)))))))))	AAGCAGAGUGAAGCAGCAGAGUCUU&AGGAUUCU--UGUU-AACUUUGCUU	0	0	NA	NA	NA	0	0	NA	NA	NA	1	32.4181	4	1	Output/R24h/cleaveLand_result/t_plot/PC-3p-110122_70_XM_016114359.2_1100_TPlot.pdf	0	0	32.4181	8.3342e-15	9.59436e-15	yes	GO:0016020(membrane)	NA
PC-3p-110122_70	XM_016114360.2	1084	1108	1097	-32.1	-21.2	0.660436	10.5	1-8,1108-1101;9-12,1098-1095;14-22,1092-1084	x-x,1100-1099[BULt];13-13,1094-1093[AILt]	(((((((((..((((..((((((((&))))))))--))))-.)))))))))	AAGCAGAGUGAAGCAGCAGAGUCUU&AGGAUUCU--UGUU-AACUUUGCUU	0	0	NA	NA	NA	0	0	NA	NA	NA	1	32.4181	4	1	Output/R24h/cleaveLand_result/t_plot/PC-3p-110122_70_XM_016114360.2_1097_TPlot.pdf	0	0	32.4181	8.3342e-15	9.59436e-15	yes	GO:0016020(membrane)	NA
PC-3p-110122_70	XM_016114512.2	420	439	430	-32.1	-21.3	0.663551	7.5	2-9,438-431;11-12,429-428;15-22,427-420	1-1,439-439[UP5];10-10,430-430[SIL];13-14,x-x[BULq]	((((((((--((.((((((((.&.)))))))).))..))))))))	GAGCGAGG--GAGAAGAAUCCG&AGGAUUCUUGUUAACUUUGCUU	1	39.6024	4	1	Output/R0h/cleaveLand_result/t_plot/PC-3p-110122_70_XM_016114512.2_430_TPlot.pdf	0	0	NA	NA	NA	0	0	NA	NA	NA	39.6024	0	0	6.3194e-18	1.52182e-17	yes	GO:0071704(organic substance metabolic process);GO:0036094(small molecule binding);GO:0006464(cellular protein modification process);GO:1901363(heterocyclic compound binding);GO:0016740(transferase activity);GO:0016301(kinase activity);GO:0035639(purine ribonucleoside triphosphate binding);GO:0043170(macromolecule metabolic process);GO:0036211(protein modification process);GO:0016310(phosphorylat…	NA
PC-3p-110122_70	XM_016115839.2	883	903	894	-32.1	-21.7	0.676012	9	2-9,902-895;11-12,893-892;15-22,890-883	1-1,903-903[UP5];10-10,894-894[SIL];13-14,891-891[AILq]	((((((((.-((.((((((((.&.)))))))).))..))))))))	AGGCGAAGG-AAGGGGAGUCCG&AGGAUUCUUGUUAACUUUGCUU	1	39.6024	4	0.999994	Output/R0h/cleaveLand_result/t_plot/PC-3p-110122_70_XM_016115839.2_894_TPlot.pdf	0	0	NA	NA	NA	0	0	NA	NA	NA	39.6024	0	0	6.3194e-18	1.52182e-17	yes	NA	NA
PC-3p-110122_70	XM_016117331.2	1094	1118	1105	-32.1	-20.9	0.65109	15	2-5,1117-1114;6-11,1109-1104;13-21,1103-1095	1-1,1118-1118[UP5];x-x,1113-1110[BULt];12-12,x-x[BULq];22-22,1094-1094[UP3]	.(((((((((-((((((....((((.&.))))----)))))).))))))))).	UAGCAAAGUU-GCAGGACAAGGUCCC&AGGAU----UCUUGUUAACUUUGCUU	0	0	NA	NA	NA	1	32.684	4	1	Output/R8h/cleaveLand_result/t_plot/PC-3p-110122_70_XM_016117331.2_1105_TPlot.pdf	0	0	NA	NA	NA	0	32.684	0	6.3879e-15	9.59436e-15	yes	GO:0044425(membrane part);GO:0016021(integral component of membrane);GO:0016020(membrane);GO:0031224(intrinsic component of membrane)	ko04626(Plant-pathogen interaction)
PC-3p-110122_70	XM_016117788.2	452	474	465	-32.1	-23.9	0.744548	9	2-4,473-471;6-19,469-456;20-22,454-452	1-1,474-474[UP5];5-5,470-470[SIL];x-x,455-455[BULt]	(((.((((((((((((((.(((.&.))).))))))))))))))-)))	GAGACAGAGUUGGCGAGGCUCCA&AGGAUUCUUGUUAACUUUG-CUU	0	0	NA	NA	NA	1	32.684	4	0.872978	Output/R8h/cleaveLand_result/t_plot/PC-3p-110122_70_XM_016117788.2_465_TPlot.pdf	1	32.4181	4	0.881918	Output/R24h/cleaveLand_result/t_plot/PC-3p-110122_70_XM_016117788.2_465_TPlot.pdf	0	32.684	32.4181	8.5335e-08	8.81903e-08	yes	GO:0016020(membrane)	NA
PC-3p-110122_70	XM_016118277.2	310	332	323	-32.1	-22	0.685358	6	1-13,332-320;15-15,318-318;16-22,316-310	14-14,319-319[SIL];x-x,317-317[BULt]	(((((((.(.(((((((((((((&))))))))))))).)-)))))))	AAGCAAAUGGUAGCAGGAGUUCU&AGGAUUCUUGUUAAC-UUUGCUU	0	0	NA	NA	NA	1	32.684	4	0.999988	Output/R8h/cleaveLand_result/t_plot/PC-3p-110122_70_XM_016118277.2_323_TPlot.pdf	0	0	NA	NA	NA	0	32.684	0	6.3879e-15	9.59436e-15	yes	GO:0006605(protein targeting);GO:0022857(transmembrane transporter activity);GO:0055085(transmembrane transport);GO:0071806(protein transmembrane transport);GO:0071705(nitrogen compound transport);GO:0033036(macromolecule localization);GO:0006886(intracellular protein transport);GO:0022884(macromolecule transmembrane transporter activity);GO:0042886(amide transport);GO:0008320(protein transmembra…	ko03060(Protein export);ko04141(Protein processing in endoplasmic reticulum);ko04145(Phagosome)
PC-3p-110122_70	XM_021125471.1	898	925	916	-32.1	-21.3	0.663551	12.5	2-10,924-916;13-17,913-909;18-22,902-898	1-1,925-925[UP5];11-12,915-914[SIL];x-x,908-903[BULt]	(((((......(((((..(((((((((.&.)))))))))..)))))------)))))	AAGCAUACAUUGAGUUCUCAGGAAUCCA&AGGAUUCUUGUUAACUU------UGCUU	0	0	NA	NA	NA	1	32.684	4	1	Output/R8h/cleaveLand_result/t_plot/PC-3p-110122_70_XM_021125471.1_916_TPlot.pdf	0	0	NA	NA	NA	0	32.684	0	6.3879e-15	9.59436e-15	yes	GO:1901564(organonitrogen compound metabolic process);GO:0046394(carboxylic acid biosynthetic process);GO:0008652(cellular amino acid biosynthetic process);GO:0030170(pyridoxal phosphate binding);GO:0048037(cofactor binding);GO:1901363(heterocyclic compound binding);GO:0018130(heterocycle biosynthetic process);GO:1901362(organic cyclic compound biosynthetic process);GO:1901605(alpha-amino acid me…	ko01230(Biosynthesis of amino acids);ko00960(Tropane, piperidine and pyridine alkaloid biosynthesis);ko00340(Histidine metabolism);ko00400(Phenylalanine, tyrosine and tryptophan biosynthesis);ko00360(Phenylalanine metabolism);ko01100(Metabolic pathways);ko00350(Tyrosine metabolism);ko01110(Biosynthesis of secondary metabolites)
PC-3p-110122_70	XM_021128342.1	378	398	389	-32.1	-23.2	0.722741	6.5	1-3,398-396;5-13,394-386;15-22,385-378	4-4,395-395[SIL];14-14,x-x[BULq]	((((((((-(((((((((.(((&))).))))))))).))))))))	AAGCAAGG-UGGCGAGAAGCCU&AGGAUUCUUGUUAACUUUGCUU	1	39.6024	4	0.982509	Output/R0h/cleaveLand_result/t_plot/PC-3p-110122_70_XM_021128342.1_389_TPlot.pdf	0	0	NA	NA	NA	0	0	NA	NA	NA	39.6024	0	0	6.3194e-18	1.52182e-17	yes	NA	ko03013(RNA transport)
PC-3p-110122_70	XM_021130255.1	1920	1939	1931	-32.1	-21.08	0.656698	8.5	2-9,1938-1931;14-22,1928-1920	1-1,1939-1939[UP5];10-13,1930-1929[AILq]	(((((((((..--((((((((.&.))))))))....)))))))))	AAGCAAGGUCA--AAGAAUCCA&AGGAUUCUUGUUAACUUUGCUU	0	0	NA	NA	NA	2	65.368	1	0.380836	Output/R8h/cleaveLand_result/t_plot/PC-3p-110122_70_XM_021130255.1_1931_TPlot.pdf	0	0	NA	NA	NA	0	65.368	0	4.0777e-29	2.60335e-28	yes	GO:0043167(ion binding);GO:0044238(primary metabolic process);GO:0019318(hexose metabolic process);GO:0043170(macromolecule metabolic process);GO:0008270(zinc ion binding);GO:0036211(protein modification process);GO:0044237(cellular metabolic process);GO:0006013(mannose metabolic process);GO:1901135(carbohydrate derivative metabolic process);GO:0016787(hydrolase activity);GO:0005996(monosaccharid…	ko00511(Other glycan degradation)
PC-3p-110122_70	XM_021131353.1	1241	1263	1254	-32.1	-23.2	0.722741	4.5	1-14,1263-1250;15-22,1248-1241	x-x,1249-1249[BULt]	((((((((.((((((((((((((&))))))))))))))-))))))))	AAGCAAGGAUUAACAAGGAUUUU&AGGAUUCUUGUUAA-CUUUGCUU	2	79.2048	2	0.674331	Output/R0h/cleaveLand_result/t_plot/PC-3p-110122_70_XM_021131353.1_1254_TPlot.pdf	1	32.684	4	0.988687	Output/R8h/cleaveLand_result/t_plot/PC-3p-110122_70_XM_021131353.1_1254_TPlot.pdf	0	0	NA	NA	NA	79.2048	32.684	0	3.556e-19	1.45865e-18	yes	GO:0006518(peptide metabolic process);GO:0016875(ligase activity, forming carbon-oxygen bonds);GO:0043043(peptide biosynthetic process);GO:0036094(small molecule binding);GO:0044249(cellular biosynthetic process);GO:0043168(anion binding);GO:0009058(biosynthetic process);GO:0043038(amino acid activation);GO:0044281(small molecule metabolic process);GO:1901576(organic substance biosynthetic proces…	ko00970(Aminoacyl-tRNA biosynthesis)
PC-3p-110122_70	XM_021132330.1	2337	2357	2349	-32.1	-21.1	0.657321	9.5	2-6,2356-2352;10-22,2349-2337	1-1,2357-2357[UP5];7-9,2351-2350[AILq]	(((((((((((((..-(((((.&.)))))...)))))))))))))	AAGCGAAGUUGGCCA-AAUCCA&AGGAUUCUUGUUAACUUUGCUU	0	0	NA	NA	NA	0	0	NA	NA	NA	1	32.4181	4	1	Output/R24h/cleaveLand_result/t_plot/PC-3p-110122_70_XM_021132330.1_2349_TPlot.pdf	0	0	32.4181	8.3342e-15	9.59436e-15	yes	NA	NA
PC-3p-110122_70	XM_021133349.1	678	702	693	-32.1	-23.6	0.735202	8	1-18,702-685;19-22,681-678	x-x,684-682[BULt]	((((...((((((((((((((((((&))))))))))))))))))---))))	AAGUGAUGAAGUUGAUGAGGAUCCU&AGGAUUCUUGUUAACUUU---GCUU	0	0	NA	NA	NA	0	0	NA	NA	NA	1	32.4181	4	0.928764	Output/R24h/cleaveLand_result/t_plot/PC-3p-110122_70_XM_021133349.1_693_TPlot.pdf	0	0	32.4181	8.3342e-15	9.59436e-15	yes	GO:0031326(regulation of cellular biosynthetic process);GO:0009058(biosynthetic process);GO:1901360(organic cyclic compound metabolic process);GO:0080090(regulation of primary metabolic process);GO:0005634(nucleus);GO:0046483(heterocycle metabolic process);GO:0060255(regulation of macromolecule metabolic process);GO:0044260(cellular macromolecule metabolic process);GO:0044464(cell part);GO:200114…	ko00051(Fructose and mannose metabolism);ko00230(Purine metabolism);ko01110(Biosynthesis of secondary metabolites);ko01100(Metabolic pathways);ko00500(Starch and sucrose metabolism)
PC-3p-110122_70	XM_021134278.1	2346	2367	2358	-32.1	-22.3	0.694704	10	2-8,2366-2360;10-11,2358-2357;14-21,2354-2347	1-1,2367-2367[UP5];9-9,2359-2359[SIL];12-13,2356-2355[SIL];22-22,2346-2346[UP3]	.((((((((..((.(((((((.&.))))))).))..)))))))).	CAGCAGGGUGUGCCGGAAUCCA&AGGAUUCUUGUUAACUUUGCUU	0	0	NA	NA	NA	0	0	NA	NA	NA	1	32.4181	4	0.999905	Output/R24h/cleaveLand_result/t_plot/PC-3p-110122_70_XM_021134278.1_2358_TPlot.pdf	0	0	32.4181	8.3342e-15	9.59436e-15	yes	GO:0032555(purine ribonucleotide binding);GO:0003824(catalytic activity);GO:0006811(ion transport);GO:0004012(phospholipid-translocating ATPase activity);GO:0031224(intrinsic component of membrane);GO:0006820(anion transport);GO:0006810(transport);GO:0016020(membrane);GO:0000287(magnesium ion binding);GO:0071702(organic substance transport);GO:0009987(cellular process);GO:0006869(lipid transport)…	NA
PC-3p-110122_70	XM_021139282.1	851	872	864	-32.1	-21.4	0.666667	5.5	2-8,871-865;10-18,864-856;19-22,854-851	1-1,872-872[UP5];9-9,x-x[BULq];x-x,855-855[BULt]	((((.(((((((((-(((((((.&.))))))).)))))))))-))))	AAGCUGAAGUUAAC-AGAAUCUC&AGGAUUCUUGUUAACUUU-GCUU	4	158.41	2	0.98824	Output/R0h/cleaveLand_result/t_plot/PC-3p-110122_70_XM_021139282.1_864_TPlot.pdf	1	32.684	4	1	Output/R8h/cleaveLand_result/t_plot/PC-3p-110122_70_XM_021139282.1_864_TPlot.pdf	0	0	NA	NA	NA	158.41	32.684	0	2.0239e-48	4.93158e-47	yes	GO:0005515(protein binding);GO:0008092(cytoskeletal protein binding);GO:0071840(cellular component organization or biogenesis);GO:0009987(cellular process);GO:0015631(tubulin binding);GO:0008017(microtubule binding);GO:0005488(binding);GO:0016043(cellular component organization);GO:0007010(cytoskeleton organization);GO:0006996(organelle organization)	ko03013(RNA transport)
PC-3p-110122_70	XM_021141082.1	821	843	833	-32.1	-22.3	0.694704	9.5	2-2,842-842;5-22,838-821	1-1,843-843[UP5];3-4,841-839[AILt]	((((((((((((((((((...(.&.)-..))))))))))))))))))	GAGUGAAGUUGACAAGAAGCACA&AG-GAUUCUUGUUAACUUUGCUU	0	0	NA	NA	NA	0	0	NA	NA	NA	1	32.4181	4	0.999922	Output/R24h/cleaveLand_result/t_plot/PC-3p-110122_70_XM_021141082.1_833_TPlot.pdf	0	0	32.4181	8.3342e-15	9.59436e-15	yes	GO:0043933(macromolecular complex subunit organization);GO:0044464(cell part);GO:0006461(protein complex assembly);GO:0022607(cellular component assembly);GO:0009987(cellular process);GO:0005829(cytosol);GO:0071840(cellular component organization or biogenesis);GO:0044424(intracellular part);GO:0005622(intracellular);GO:0044085(cellular component biogenesis);GO:0034622(cellular macromolecular com…	NA
PC-3p-110122_70	XM_021141085.1	821	843	833	-32.1	-22.3	0.694704	9.5	2-2,842-842;5-22,838-821	1-1,843-843[UP5];3-4,841-839[AILt]	((((((((((((((((((...(.&.)-..))))))))))))))))))	GAGUGAAGUUGACAAGAAGCACA&AG-GAUUCUUGUUAACUUUGCUU	1	39.6024	4	0.999407	Output/R0h/cleaveLand_result/t_plot/PC-3p-110122_70_XM_021141085.1_833_TPlot.pdf	0	0	NA	NA	NA	0	0	NA	NA	NA	39.6024	0	0	6.3194e-18	1.52182e-17	yes	GO:0043933(macromolecular complex subunit organization);GO:0044464(cell part);GO:0006461(protein complex assembly);GO:0022607(cellular component assembly);GO:0009987(cellular process);GO:0005829(cytosol);GO:0071840(cellular component organization or biogenesis);GO:0044424(intracellular part);GO:0005622(intracellular);GO:0044085(cellular component biogenesis);GO:0034622(cellular macromolecular com…	NA
PC-3p-110122_70	XM_021141158.1	809	831	821	-32.1	-23.3	0.725857	9	2-4,830-828;6-22,825-809	1-1,831-831[UP5];5-5,827-826[AILt]	(((((((((((((((((..(((.&.)))-.)))))))))))))))))	AAGCGAGGUUAGCAAGGUUUUCA&AGGA-UUCUUGUUAACUUUGCUU	0	0	NA	NA	NA	0	0	NA	NA	NA	1	32.4181	4	0.98757	Output/R24h/cleaveLand_result/t_plot/PC-3p-110122_70_XM_021141158.1_821_TPlot.pdf	0	0	32.4181	8.3342e-15	9.59436e-15	yes	GO:0022857(transmembrane transporter activity);GO:0006865(amino acid transport);GO:0044464(cell part);GO:0071702(organic substance transport);GO:0008514(organic anion transmembrane transporter activity);GO:0016021(integral component of membrane);GO:0005623(cell);GO:0006811(ion transport);GO:0015075(ion transmembrane transporter activity);GO:0015849(organic acid transport);GO:0003333(amino acid tr…	NA
PC-3p-110122_70	XM_021142149.1	446	470	462	-32.1	-21.8	0.679128	8	1-3,470-468;5-14,467-458;15-22,453-446	4-4,x-x[BULq];x-x,457-454[BULt]	((((((((....((((((((((-(((&))).))))))))))----))))))))	GAGCAAGGGAAUUUAGCAAGAA-CCU&AGGAUUCUUGUUAA----CUUUGCUU	0	0	NA	NA	NA	1	32.684	4	0.999998	Output/R8h/cleaveLand_result/t_plot/PC-3p-110122_70_XM_021142149.1_462_TPlot.pdf	0	0	NA	NA	NA	0	32.684	0	6.3879e-15	9.59436e-15	yes	GO:0043227(membrane-bounded organelle);GO:0043229(intracellular organelle);GO:0043226(organelle);GO:0016020(membrane);GO:0044464(cell part);GO:0043231(intracellular membrane-bounded organelle);GO:0044424(intracellular part);GO:0012505(endomembrane system);GO:0031224(intrinsic component of membrane);GO:0044444(cytoplasmic part);GO:0044425(membrane part);GO:0005737(cytoplasm);GO:0005794(Golgi appar…	ko00040(Pentose and glucuronate interconversions);ko01100(Metabolic pathways)
PC-3p-110122_70	XM_021143346.1	4314	4335	4326	-32.1	-21.6	0.672897	8.5	1-4,4335-4332;6-19,4330-4317	5-5,4331-4331[SIL];20-22,4316-4314[UP3]	...((((((((((((((.((((&)))).))))))))))))))...	GAACAGAGUUGAUGAGACUCCU&AGGAUUCUUGUUAACUUUGCUU	0	0	NA	NA	NA	0	0	NA	NA	NA	1	32.4181	4	1	Output/R24h/cleaveLand_result/t_plot/PC-3p-110122_70_XM_021143346.1_4326_TPlot.pdf	0	0	32.4181	8.3342e-15	9.59436e-15	yes	GO:0044424(intracellular part);GO:0005634(nucleus);GO:0005623(cell);GO:0005488(binding);GO:0003682(chromatin binding);GO:0043231(intracellular membrane-bounded organelle);GO:0043229(intracellular organelle);GO:0043227(membrane-bounded organelle);GO:0043226(organelle);GO:0044464(cell part);GO:0005622(intracellular)	NA
PC-3p-110421_70	BGI_novel_T013771	406	436	420	-39	-27.2	0.697436	18	1-7,436-430;8-12,422-418;15-24,415-406	x-x,429-423[BULt];13-14,417-416[SIL]	((((((((((..(((((.......(((((((&)))))))-------)))))..))))))))))	AGUCGUCAAAGACAGUCAAACGCCGCUCGUG&UACGAGU-------GACUGAAUUUGAUGACU	0	0	NA	NA	NA	1	32.684	4	0.298821	Output/R8h/cleaveLand_result/t_plot/PC-3p-110421_70_BGI_novel_T013771_420_TPlot.pdf	0	0	NA	NA	NA	0	32.684	0	6.3879e-15	9.59436e-15	yes	GO:0031224(intrinsic component of membrane);GO:0003824(catalytic activity);GO:0044425(membrane part);GO:1901363(heterocyclic compound binding);GO:0005488(binding);GO:0043167(ion binding);GO:0017076(purine nucleotide binding);GO:0016021(integral component of membrane);GO:0097159(organic cyclic compound binding);GO:0032553(ribonucleotide binding);GO:0000166(nucleotide binding);GO:0016787(hydrolase …	NA
PC-3p-110421_70	BGI_novel_T013772	406	436	420	-39	-27.2	0.697436	18	1-7,436-430;8-12,422-418;15-24,415-406	x-x,429-423[BULt];13-14,417-416[SIL]	((((((((((..(((((.......(((((((&)))))))-------)))))..))))))))))	AGUCGUCAAAGACAGUCAAACGCCGCUCGUG&UACGAGU-------GACUGAAUUUGAUGACU	0	0	NA	NA	NA	1	32.684	4	0.28309	Output/R8h/cleaveLand_result/t_plot/PC-3p-110421_70_BGI_novel_T013772_420_TPlot.pdf	0	0	NA	NA	NA	0	32.684	0	6.3879e-15	9.59436e-15	yes	GO:0031224(intrinsic component of membrane);GO:0003824(catalytic activity);GO:0044425(membrane part);GO:1901363(heterocyclic compound binding);GO:0005488(binding);GO:0043167(ion binding);GO:0017076(purine nucleotide binding);GO:0016021(integral component of membrane);GO:0097159(organic cyclic compound binding);GO:0032553(ribonucleotide binding);GO:0000166(nucleotide binding);GO:0016787(hydrolase …	NA
PC-3p-110421_70	XM_016096251.2	336	367	350	-39	-25.52	0.654359	23.5	3-7,365-361;10-24,350-336	1-2,367-366[UP5];8-9,360-351[AILt]	(((((((((((((((..........(((((..&..)))))--------..)))))))))))))))	AGUCAUCAAGUUCAGGAACAGCUAGACUCGAU&UACGAGU--------GACUGAAUUUGAUGACU	0	0	NA	NA	NA	1	32.684	4	0.677463	Output/R8h/cleaveLand_result/t_plot/PC-3p-110421_70_XM_016096251.2_350_TPlot.pdf	0	0	NA	NA	NA	0	32.684	0	6.3879e-15	9.59436e-15	yes	NA	ko04144(Endocytosis)
PC-3p-110421_70	XM_016104157.2	603	624	615	-39	-27.6	0.707692	4.5	1-17,624-608;20-24,607-603	18-19,x-x[BULq]	(((((--(((((((((((((((((&)))))))))))))))))..)))))	GGUCG--AAAUUCAGUCACUUGUG&UACGAGUGACUGAAUUUGAUGACU	4	158.41	2	0.069655	Output/R0h/cleaveLand_result/t_plot/PC-3p-110421_70_XM_016104157.2_615_TPlot.pdf	1	32.684	4	0.250562	Output/R8h/cleaveLand_result/t_plot/PC-3p-110421_70_XM_016104157.2_615_TPlot.pdf	3	97.2542	3	0.0260697	Output/R24h/cleaveLand_result/t_plot/PC-3p-110421_70_XM_016104157.2_615_TPlot.pdf	158.41	32.684	97.2542	1.3748e-18	5.61616e-18	yes	NA	NA
PC-3p-110421_70	XM_016107410.2	564	587	578	-39	-25.4	0.651282	10.5	4-16,584-572;18-24,570-564	1-3,587-585[UP5];17-17,571-571[SIL]	(((((((.(((((((((((((...&...))))))))))))).)))))))	AGUUAUCUGGUUCGGUUGCUCUCU&UACGAGUGACUGAAUUUGAUGACU	0	0	NA	NA	NA	0	0	NA	NA	NA	1	32.4181	4	0.770119	Output/R24h/cleaveLand_result/t_plot/PC-3p-110421_70_XM_016107410.2_578_TPlot.pdf	0	0	32.4181	8.3342e-15	9.59436e-15	yes	GO:0071556(integral component of lumenal side of endoplasmic reticulum membrane);GO:0006518(peptide metabolic process);GO:0098827(endoplasmic reticulum subcompartment);GO:0097708(intracellular vesicle);GO:0043603(cellular amide metabolic process);GO:0004175(endopeptidase activity);GO:0016787(hydrolase activity);GO:0031984(organelle subcompartment);GO:0098553(lumenal side of endoplasmic reticulum …	NA
PC-3p-110421_70	XM_021138029.1	2126	2149	2140	-39	-28.1	0.720513	10.5	5-23,2145-2127	1-4,2149-2146[UP5];24-24,2126-2126[UP3]	.(((((((((((((((((((....&....))))))))))))))))))).	UGUCAUCAGAUUUGGUCACUGCAG&UACGAGUGACUGAAUUUGAUGACU	0	0	NA	NA	NA	2	65.368	1	0.000857209	Output/R8h/cleaveLand_result/t_plot/PC-3p-110421_70_XM_021138029.1_2140_TPlot.pdf	0	0	NA	NA	NA	0	65.368	0	4.0777e-29	2.60335e-28	yes	GO:0016301(kinase activity);GO:0017111(nucleoside-triphosphatase activity);GO:0097159(organic cyclic compound binding);GO:0016787(hydrolase activity);GO:0008152(metabolic process);GO:0051301(cell division);GO:0016462(pyrophosphatase activity);GO:0097367(carbohydrate derivative binding);GO:0016772(transferase activity, transferring phosphorus-containing groups);GO:0032555(purine ribonucleotide bin…	ko01100(Metabolic pathways);ko04141(Protein processing in endoplasmic reticulum);ko00510(N-Glycan biosynthesis)
PC-3p-110449_70	BGI_novel_T006116	973	996	987	-37.9	-29.2	0.770449	5	1-13,996-984;15-24,982-973	14-14,983-983[SIL]	((((((((((.(((((((((((((&))))))))))))).))))))))))	GGUGUAAUUGUCUUUAUGUGAAGU&AUUUUACAUGAAGUCGAUUGCACC	0	0	NA	NA	NA	2	65.368	2	0.269742	Output/R8h/cleaveLand_result/t_plot/PC-3p-110449_70_BGI_novel_T006116_987_TPlot.pdf	2	64.8361	2	0.272297	Output/R24h/cleaveLand_result/t_plot/PC-3p-110449_70_BGI_novel_T006116_987_TPlot.pdf	0	65.368	64.8361	7.2768e-15	9.59436e-15	yes	GO:0008152(metabolic process)	NA
PC-3p-110449_70	BGI_novel_T006117	1132	1155	1146	-37.9	-29.2	0.770449	5	1-13,1155-1143;15-24,1141-1132	14-14,1142-1142[SIL]	((((((((((.(((((((((((((&))))))))))))).))))))))))	GGUGUAAUUGUCUUUAUGUGAAGU&AUUUUACAUGAAGUCGAUUGCACC	0	0	NA	NA	NA	0	0	NA	NA	NA	2	64.8361	2	0.277783	Output/R24h/cleaveLand_result/t_plot/PC-3p-110449_70_BGI_novel_T006117_1146_TPlot.pdf	0	0	64.8361	6.941e-29	3.45403e-28	yes	GO:0008152(metabolic process)	NA
PC-3p-110449_70	XM_016107444.2	403	428	419	-37.9	-25.58	0.674934	12	1-4,428-425;7-15,422-414;18-24,409-403	5-6,424-423[SIL];16-17,413-410[AILt]	(((((((....(((((((((..((((&))))..)))))))))--..)))))))	GGUGCGAGGAGGGCUUCGUGGAGGAU&AUUUUACAUGAAGUC--GAUUGCACC	0	0	NA	NA	NA	2	65.368	3	0.254323	Output/R8h/cleaveLand_result/t_plot/PC-3p-110449_70_XM_016107444.2_419_TPlot.pdf	0	0	NA	NA	NA	0	65.368	0	4.0777e-29	2.60335e-28	yes	GO:0005515(protein binding);GO:0005488(binding);GO:0019904(protein domain specific binding)	NA
PC-3p-110449_70	XM_016107445.2	368	393	384	-37.9	-25.58	0.674934	12	1-4,393-390;7-15,387-379;18-24,374-368	5-6,389-388[SIL];16-17,378-375[AILt]	(((((((....(((((((((..((((&))))..)))))))))--..)))))))	GGUGCGAGGAGGGCUUCGUGGAGGAU&AUUUUACAUGAAGUC--GAUUGCACC	0	0	NA	NA	NA	4	130.736	2	0.630449	Output/R8h/cleaveLand_result/t_plot/PC-3p-110449_70_XM_016107445.2_384_TPlot.pdf	2	64.8361	3	0.236813	Output/R24h/cleaveLand_result/t_plot/PC-3p-110449_70_XM_016107445.2_384_TPlot.pdf	0	130.736	64.8361	3.3989e-29	2.60335e-28	yes	GO:0005515(protein binding);GO:0005488(binding);GO:0019904(protein domain specific binding)	NA
PC-3p-110449_70	XM_016108540.2	384	413	404	-37.9	-27.3	0.720317	17	6-18,408-396;19-24,389-384	1-5,413-409[UP5];x-x,395-390[BULt]	((((((......(((((((((((((.....&.....)))))))))))))------))))))	GGUGCGUCGCUCGUCGACUUCGUGUUCCUC&AUUUUACAUGAAGUCGAU------UGCACC	0	0	NA	NA	NA	2	65.368	3	0.142129	Output/R8h/cleaveLand_result/t_plot/PC-3p-110449_70_XM_016108540.2_404_TPlot.pdf	0	0	NA	NA	NA	0	65.368	0	4.0777e-29	2.60335e-28	yes	GO:0005740(mitochondrial envelope);GO:0022900(electron transport chain);GO:0019866(organelle inner membrane);GO:0019752(carboxylic acid metabolic process);GO:0044237(cellular metabolic process);GO:0000104(succinate dehydrogenase activity);GO:0043436(oxoacid metabolic process);GO:0050662(coenzyme binding);GO:0044429(mitochondrial part);GO:1901363(heterocyclic compound binding);GO:0031090(organelle…	ko01200(Carbon metabolism);ko00190(Oxidative phosphorylation);ko01100(Metabolic pathways);ko00020(Citrate cycle (TCA cycle));ko01110(Biosynthesis of secondary metabolites)
PC-3p-110449_70	XM_021141904.1	1494	1517	1508	-37.9	-29.2	0.770449	5	1-13,1517-1505;15-24,1503-1494	14-14,1504-1504[SIL]	((((((((((.(((((((((((((&))))))))))))).))))))))))	GGUGUAAUUGUCUUUAUGUGAAGU&AUUUUACAUGAAGUCGAUUGCACC	0	0	NA	NA	NA	1	32.684	4	0.597342	Output/R8h/cleaveLand_result/t_plot/PC-3p-110449_70_XM_021141904.1_1508_TPlot.pdf	0	0	NA	NA	NA	0	32.684	0	6.3879e-15	9.59436e-15	yes	GO:0008152(metabolic process)	NA
PC-3p-110481_70	BGI_novel_T003273	2041	2064	2056	-42.3	-28.1	0.664303	7.5	2-8,2063-2057;10-16,2056-2050;17-23,2048-2042	1-1,2064-2064[UP5];9-9,x-x[BULq];x-x,2049-2049[BULt];24-24,2041-2041[UP3]	.(((((((.(((((((-(((((((.&.))))))).)))))))-))))))).	CUUCAGGUAGCAGAUG-UUUUGCGC&ACGUAAAAUCGUCUGC-ACCUGAGU	0	0	NA	NA	NA	0	0	NA	NA	NA	4	129.672	1	0.0181452	Output/R24h/cleaveLand_result/t_plot/PC-3p-110481_70_BGI_novel_T003273_2056_TPlot.pdf	0	0	129.672	4.8042e-57	1.62433e-55	yes	GO:0016043(cellular component organization);GO:0032502(developmental process);GO:0048856(anatomical structure development);GO:0048869(cellular developmental process);GO:0009987(cellular process);GO:0009653(anatomical structure morphogenesis);GO:0071840(cellular component organization or biogenesis);GO:0000902(cell morphogenesis);GO:0032989(cellular component morphogenesis)	ko03040(Spliceosome)
PC-3p-110481_70	XM_016076506.2	1467	1491	1482	-42.3	-27.8	0.65721	9	2-4,1490-1488;7-15,1485-1477;16-24,1475-1467	1-1,1491-1491[UP5];5-6,1487-1486[SIL];x-x,1476-1476[BULt]	(((((((((.(((((((((..(((.&.)))..)))))))))-)))))))))	GCUUAGGUGAUGGACGGUUGAACGA&ACGUAAAAUCGUCUG-CACCUGAGU	0	0	NA	NA	NA	0	0	NA	NA	NA	1	32.4181	4	0.697154	Output/R24h/cleaveLand_result/t_plot/PC-3p-110481_70_XM_016076506.2_1482_TPlot.pdf	0	0	32.4181	8.3342e-15	9.59436e-15	yes	GO:0009057(macromolecule catabolic process);GO:0036211(protein modification process);GO:0032553(ribonucleotide binding);GO:0036094(small molecule binding);GO:0005737(cytoplasm);GO:0016740(transferase activity);GO:0008152(metabolic process);GO:0016874(ligase activity);GO:0044424(intracellular part);GO:0044238(primary metabolic process);GO:0030163(protein catabolic process);GO:0043226(organelle);GO…	ko04120(Ubiquitin mediated proteolysis)
PC-3p-110481_70	XM_016098458.2	1723	1746	1738	-42.3	-28.1	0.664303	7.5	2-8,1745-1739;10-16,1738-1732;17-23,1730-1724	1-1,1746-1746[UP5];9-9,x-x[BULq];x-x,1731-1731[BULt];24-24,1723-1723[UP3]	.(((((((.(((((((-(((((((.&.))))))).)))))))-))))))).	CUUCAGGUAGCAGAUG-UUUUGCGC&ACGUAAAAUCGUCUGC-ACCUGAGU	0	0	NA	NA	NA	0	0	NA	NA	NA	1	32.4181	4	0.618946	Output/R24h/cleaveLand_result/t_plot/PC-3p-110481_70_XM_016098458.2_1738_TPlot.pdf	0	0	32.4181	8.3342e-15	9.59436e-15	yes	GO:0016043(cellular component organization);GO:0032502(developmental process);GO:0048856(anatomical structure development);GO:0048869(cellular developmental process);GO:0009987(cellular process);GO:0009653(anatomical structure morphogenesis);GO:0071840(cellular component organization or biogenesis);GO:0000902(cell morphogenesis);GO:0032989(cellular component morphogenesis)	ko03040(Spliceosome)
PC-3p-110481_70	XM_016098459.2	1710	1733	1725	-42.3	-28.1	0.664303	7.5	2-8,1732-1726;10-16,1725-1719;17-23,1717-1711	1-1,1733-1733[UP5];9-9,x-x[BULq];x-x,1718-1718[BULt];24-24,1710-1710[UP3]	.(((((((.(((((((-(((((((.&.))))))).)))))))-))))))).	CUUCAGGUAGCAGAUG-UUUUGCGC&ACGUAAAAUCGUCUGC-ACCUGAGU	0	0	NA	NA	NA	0	0	NA	NA	NA	1	32.4181	4	0.55247	Output/R24h/cleaveLand_result/t_plot/PC-3p-110481_70_XM_016098459.2_1725_TPlot.pdf	0	0	32.4181	8.3342e-15	9.59436e-15	yes	GO:0016043(cellular component organization);GO:0032502(developmental process);GO:0048856(anatomical structure development);GO:0048869(cellular developmental process);GO:0009987(cellular process);GO:0009653(anatomical structure morphogenesis);GO:0071840(cellular component organization or biogenesis);GO:0000902(cell morphogenesis);GO:0032989(cellular component morphogenesis)	ko03040(Spliceosome)
PC-3p-110481_70	XM_016107171.2	466	489	480	-42.3	-29.4	0.695035	8	3-13,487-477;15-22,475-468	1-2,489-488[UP5];14-14,476-476[SIL];23-24,467-466[UP3]	..((((((((.(((((((((((..&..))))))))))).))))))))..	AAUCAGGUGCUGAUGAUUUUGCCC&ACGUAAAAUCGUCUGCACCUGAGU	0	0	NA	NA	NA	1	32.684	4	0.267006	Output/R8h/cleaveLand_result/t_plot/PC-3p-110481_70_XM_016107171.2_480_TPlot.pdf	0	0	NA	NA	NA	0	32.684	0	6.3879e-15	9.59436e-15	yes	GO:1901363(heterocyclic compound binding);GO:0044260(cellular macromolecule metabolic process);GO:0044267(cellular protein metabolic process);GO:0019538(protein metabolic process);GO:0009058(biosynthetic process);GO:0006413(translational initiation);GO:0043170(macromolecule metabolic process);GO:0044238(primary metabolic process);GO:0044249(cellular biosynthetic process);GO:0043603(cellular amide…	ko03022(Basal transcription factors)
PC-3p-110481_70	XM_016107172.2	381	404	395	-42.3	-29.4	0.695035	8	3-13,402-392;15-22,390-383	1-2,404-403[UP5];14-14,391-391[SIL];23-24,382-381[UP3]	..((((((((.(((((((((((..&..))))))))))).))))))))..	AAUCAGGUGCUGAUGAUUUUGCCC&ACGUAAAAUCGUCUGCACCUGAGU	0	0	NA	NA	NA	2	65.368	2	0.0790337	Output/R8h/cleaveLand_result/t_plot/PC-3p-110481_70_XM_016107172.2_395_TPlot.pdf	0	0	NA	NA	NA	0	65.368	0	4.0777e-29	2.60335e-28	yes	GO:1901363(heterocyclic compound binding);GO:0044260(cellular macromolecule metabolic process);GO:0044267(cellular protein metabolic process);GO:0019538(protein metabolic process);GO:0009058(biosynthetic process);GO:0006413(translational initiation);GO:0043170(macromolecule metabolic process);GO:0044238(primary metabolic process);GO:0044249(cellular biosynthetic process);GO:0043603(cellular amide…	ko03022(Basal transcription factors)
PC-3p-110481_70	XM_016116985.2	1601	1624	1615	-42.3	-27.6	0.652482	17.5	10-24,1615-1601	1-9,1624-1616[UP5]	(((((((((((((((.........&.........)))))))))))))))	AUUCAGGUGCAGACGUUAAAGUAA&ACGUAAAAUCGUCUGCACCUGAGU	0	0	NA	NA	NA	0	0	NA	NA	NA	3	97.2542	2	0.360149	Output/R24h/cleaveLand_result/t_plot/PC-3p-110481_70_XM_016116985.2_1615_TPlot.pdf	0	0	97.2542	5.7766e-43	9.1307e-42	yes	GO:0004672(protein kinase activity);GO:0006793(phosphorus metabolic process);GO:1901265(nucleoside phosphate binding);GO:0006468(protein phosphorylation);GO:0018209(peptidyl-serine modification);GO:0005622(intracellular);GO:0051716(cellular response to stimulus);GO:0006796(phosphate-containing compound metabolic process);GO:0005623(cell);GO:0043168(anion binding);GO:0007154(cell communication);GO…	NA
PC-3p-110481_70	XM_021127639.1	1470	1494	1485	-42.3	-27.8	0.65721	9	2-4,1493-1491;7-15,1488-1480;16-24,1478-1470	1-1,1494-1494[UP5];5-6,1490-1489[SIL];x-x,1479-1479[BULt]	(((((((((.(((((((((..(((.&.)))..)))))))))-)))))))))	GCUUAGGUGAUGGACGGUUGAACGA&ACGUAAAAUCGUCUG-CACCUGAGU	0	0	NA	NA	NA	0	0	NA	NA	NA	2	64.8361	2	0.335473	Output/R24h/cleaveLand_result/t_plot/PC-3p-110481_70_XM_021127639.1_1485_TPlot.pdf	0	0	64.8361	6.941e-29	3.45403e-28	yes	GO:0009057(macromolecule catabolic process);GO:0036211(protein modification process);GO:0032553(ribonucleotide binding);GO:0036094(small molecule binding);GO:0005737(cytoplasm);GO:0016740(transferase activity);GO:0008152(metabolic process);GO:0016874(ligase activity);GO:0044424(intracellular part);GO:0044238(primary metabolic process);GO:0030163(protein catabolic process);GO:0043226(organelle);GO…	ko04120(Ubiquitin mediated proteolysis)
PC-3p-113847_67	BGI_novel_T006595	1547	1571	1562	-42.2	-36	0.853081	3	1-7,1571-1565;9-17,1563-1555;18-24,1553-1547	8-8,1564-1564[SIL];x-x,1554-1554[BULt]	(((((((.(((((((((.(((((((&))))))).)))))))))-)))))))	AACUCAGCUGCAGUCGACUUCACGU&ACGUGAAAUCGACUGCA-CUGAGUU	0	0	NA	NA	NA	1	32.684	4	0.18101	Output/R8h/cleaveLand_result/t_plot/PC-3p-113847_67_BGI_novel_T006595_1562_TPlot.pdf	0	0	NA	NA	NA	0	32.684	0	6.3879e-15	9.59436e-15	yes	NA	NA
PC-3p-114045_66	XM_016076521.2	1082	1109	1097	-37.3	-24.4	0.654155	11	1-6,1109-1104;7-13,1100-1094;14-15,1092-1091;17-24,1089-1082	x-x,1103-1101[BULt];x-x,1093-1093[BULt];16-16,1090-1090[SIL]	((((((((.((.(((((((...((((((&))))))---)))))))-)).))))))))	AGUCAGGGGUUCGUCUUGUUCGUGGCAU&AUGCUA---AUAAGAC-AAGUUCUGACU	0	0	NA	NA	NA	0	0	NA	NA	NA	1	32.4181	4	0.928764	Output/R24h/cleaveLand_result/t_plot/PC-3p-114045_66_XM_016076521.2_1097_TPlot.pdf	0	0	32.4181	8.3342e-15	9.59436e-15	yes	GO:0016491(oxidoreductase activity);GO:0003824(catalytic activity);GO:0055114(oxidation-reduction process);GO:0008152(metabolic process)	NA
PC-3p-114045_66	XM_021129892.1	125	149	140	-37.3	-25	0.670241	8.5	1-4,149-146;6-8,144-142;10-22,140-128;23-24,126-125	5-5,145-145[SIL];9-9,141-141[SIL];x-x,127-127[BULt]	((.(((((((((((((.(((.((((&)))).))).)))))))))))))-))	GGCUCGGAGCUUGUCUCGUUCGCGU&AUGCUAAUAAGACAAGUUCUGA-CU	0	0	NA	NA	NA	0	0	NA	NA	NA	1	32.4181	4	0.854798	Output/R24h/cleaveLand_result/t_plot/PC-3p-114045_66_XM_021129892.1_140_TPlot.pdf	0	0	32.4181	8.3342e-15	9.59436e-15	yes	NA	NA
PC-3p-114614_66	BGI_novel_T008593	1630	1653	1644	-37.3	-25.4	0.680965	16	8-18,1646-1636;20-24,1634-1630	1-7,1653-1647[UP5];19-19,1635-1635[SIL]	(((((.(((((((((((.......&.......))))))))))).)))))	ACUCUGGUGAUGGUGUCACUCAUG&AUGUAAAGAUAUCAUCACGAGAGU	0	0	NA	NA	NA	0	0	NA	NA	NA	1	32.4181	4	0.423813	Output/R24h/cleaveLand_result/t_plot/PC-3p-114614_66_BGI_novel_T008593_1644_TPlot.pdf	0	0	32.4181	8.3342e-15	9.59436e-15	yes	GO:0097367(carbohydrate derivative binding);GO:0044464(cell part);GO:0050789(regulation of biological process);GO:0051130(positive regulation of cellular component organization);GO:0036094(small molecule binding);GO:0044430(cytoskeletal part);GO:0030029(actin filament-based process);GO:0044089(positive regulation of cellular component biogenesis);GO:0043228(non-membrane-bounded organelle);GO:0033…	NA
PC-3p-114614_66	XM_016083347.2	756	779	770	-37.3	-27.6	0.739946	9.5	4-6,776-774;8-24,772-756	1-3,779-777[UP5];7-7,773-773[SIL]	(((((((((((((((((.(((...&...))).)))))))))))))))))	GCUCUCGUGAUGAUGUUGUUAAUA&AUGUAAAGAUAUCAUCACGAGAGU	4	158.41	2	0.0219704	Output/R0h/cleaveLand_result/t_plot/PC-3p-114614_66_XM_016083347.2_770_TPlot.pdf	1	32.684	4	0.084924	Output/R8h/cleaveLand_result/t_plot/PC-3p-114614_66_XM_016083347.2_770_TPlot.pdf	2	64.8361	2	0.029819	Output/R24h/cleaveLand_result/t_plot/PC-3p-114614_66_XM_016083347.2_770_TPlot.pdf	158.41	32.684	64.8361	1.9067e-22	8.61937e-22	yes	GO:1901576(organic substance biosynthetic process);GO:0006497(protein lipidation);GO:0009987(cellular process);GO:0042158(lipoprotein biosynthetic process);GO:0009058(biosynthetic process);GO:0044260(cellular macromolecule metabolic process);GO:1901566(organonitrogen compound biosynthetic process);GO:0008152(metabolic process);GO:0043412(macromolecule modification);GO:0034645(cellular macromolecu…	NA
PC-3p-114614_66	XM_016084219.2	1864	1888	1878	-37.3	-25.6	0.686327	11.5	2-4,1887-1885;9-24,1879-1864	1-1,1888-1888[UP5];5-8,1884-1880[AILt]	((((((((((((((((.....(((.&.)))-....))))))))))))))))	ACUCUUGUGAUGAUAUGAUGGACAG&AUGU-AAAGAUAUCAUCACGAGAGU	1	39.6024	4	0.294913	Output/R0h/cleaveLand_result/t_plot/PC-3p-114614_66_XM_016084219.2_1878_TPlot.pdf	0	0	NA	NA	NA	0	0	NA	NA	NA	39.6024	0	0	6.3194e-18	1.52182e-17	yes	NA	NA
PC-3p-114614_66	XM_016086824.2	1920	1947	1934	-37.3	-25.06	0.67185	16	2-5,1946-1943;8-23,1936-1921	1-1,1947-1947[UP5];6-7,1942-1937[AILt];24-24,1920-1920[UP3]	.((((((((((((((((......((((.&.))))----..)))))))))))))))).	UCUCUUGUGGUGAUGUCAAAAGGUACAC&AUGUA----AAGAUAUCAUCACGAGAGU	1	39.6024	4	0.622709	Output/R0h/cleaveLand_result/t_plot/PC-3p-114614_66_XM_016086824.2_1934_TPlot.pdf	0	0	NA	NA	NA	0	0	NA	NA	NA	39.6024	0	0	6.3194e-18	1.52182e-17	yes	GO:0022604(regulation of cell morphogenesis);GO:0017076(purine nucleotide binding);GO:0018193(peptidyl-amino acid modification);GO:0007267(cell-cell signaling);GO:0050793(regulation of developmental process);GO:0006796(phosphate-containing compound metabolic process);GO:0003824(catalytic activity);GO:0018209(peptidyl-serine modification);GO:0006464(cellular protein modification process);GO:006500…	NA
PC-3p-114614_66	XM_016087566.2	429	452	443	-37.3	-29.9	0.801609	5.5	3-11,450-442;13-24,440-429	1-2,452-451[UP5];12-12,441-441[SIL]	((((((((((((.(((((((((..&..))))))))).))))))))))))	ACUCUUGUGAUGUUAUCUUUACUG&AUGUAAAGAUAUCAUCACGAGAGU	0	0	NA	NA	NA	0	0	NA	NA	NA	1	32.4181	4	0.0449041	Output/R24h/cleaveLand_result/t_plot/PC-3p-114614_66_XM_016087566.2_443_TPlot.pdf	0	0	32.4181	8.3342e-15	9.59436e-15	yes	GO:0034641(cellular nitrogen compound metabolic process);GO:0090304(nucleic acid metabolic process);GO:0008152(metabolic process);GO:0016787(hydrolase activity);GO:0046914(transition metal ion binding);GO:0003676(nucleic acid binding);GO:0046483(heterocycle metabolic process);GO:0043167(ion binding);GO:1901363(heterocyclic compound binding);GO:0043170(macromolecule metabolic process);GO:1901360(o…	ko00020(Citrate cycle (TCA cycle));ko01110(Biosynthesis of secondary metabolites);ko00190(Oxidative phosphorylation);ko01200(Carbon metabolism);ko01100(Metabolic pathways)
PC-3p-114614_66	XM_016105787.2	1400	1423	1414	-37.3	-29.6	0.793566	8	2-5,1422-1419;8-24,1416-1400	1-1,1423-1423[UP5];6-7,1418-1417[SIL]	(((((((((((((((((..((((.&.))))..)))))))))))))))))	GCUCUCGUGGUGAUGUCACUAUAC&AUGUAAAGAUAUCAUCACGAGAGU	0	0	NA	NA	NA	0	0	NA	NA	NA	1	32.4181	4	0.0665943	Output/R24h/cleaveLand_result/t_plot/PC-3p-114614_66_XM_016105787.2_1414_TPlot.pdf	0	0	32.4181	8.3342e-15	9.59436e-15	yes	GO:0044425(membrane part);GO:0031224(intrinsic component of membrane);GO:0046872(metal ion binding);GO:0005509(calcium ion binding);GO:0016020(membrane);GO:0043167(ion binding);GO:0005488(binding);GO:0016021(integral component of membrane);GO:0043169(cation binding)	NA
PC-3p-114614_66	XM_016114267.2	973	996	987	-37.3	-25.2	0.675603	8.5	3-5,994-992;8-17,989-980;19-24,978-973	1-2,996-995[UP5];6-7,991-990[SIL];18-18,979-979[SIL]	((((((.((((((((((..(((..&..)))..)))))))))).))))))	GCUCUCAUGAUGAUAUCACUACUC&AUGUAAAGAUAUCAUCACGAGAGU	0	0	NA	NA	NA	2	65.368	2	0.241896	Output/R8h/cleaveLand_result/t_plot/PC-3p-114614_66_XM_016114267.2_987_TPlot.pdf	0	0	NA	NA	NA	0	65.368	0	4.0777e-29	2.60335e-28	yes	NA	NA
PC-3p-114614_66	XM_021125110.1	1630	1653	1644	-37.3	-25.4	0.680965	16	8-18,1646-1636;20-24,1634-1630	1-7,1653-1647[UP5];19-19,1635-1635[SIL]	(((((.(((((((((((.......&.......))))))))))).)))))	ACUCUGGUGAUGGUGUCACUCAUG&AUGUAAAGAUAUCAUCACGAGAGU	0	0	NA	NA	NA	0	0	NA	NA	NA	1	32.4181	4	0.436898	Output/R24h/cleaveLand_result/t_plot/PC-3p-114614_66_XM_021125110.1_1644_TPlot.pdf	0	0	32.4181	8.3342e-15	9.59436e-15	yes	GO:0097367(carbohydrate derivative binding);GO:0044464(cell part);GO:0050789(regulation of biological process);GO:0051130(positive regulation of cellular component organization);GO:0036094(small molecule binding);GO:0044430(cytoskeletal part);GO:0030029(actin filament-based process);GO:0044089(positive regulation of cellular component biogenesis);GO:0043228(non-membrane-bounded organelle);GO:0033…	NA
PC-3p-114614_66	XM_021125111.1	1589	1612	1603	-37.3	-25.4	0.680965	16	8-18,1605-1595;20-24,1593-1589	1-7,1612-1606[UP5];19-19,1594-1594[SIL]	(((((.(((((((((((.......&.......))))))))))).)))))	ACUCUGGUGAUGGUGUCACUCAUG&AUGUAAAGAUAUCAUCACGAGAGU	1	39.6024	4	0.332762	Output/R0h/cleaveLand_result/t_plot/PC-3p-114614_66_XM_021125111.1_1603_TPlot.pdf	0	0	NA	NA	NA	0	0	NA	NA	NA	39.6024	0	0	6.3194e-18	1.52182e-17	yes	GO:0097367(carbohydrate derivative binding);GO:0044464(cell part);GO:0050789(regulation of biological process);GO:0051130(positive regulation of cellular component organization);GO:0036094(small molecule binding);GO:0044430(cytoskeletal part);GO:0030029(actin filament-based process);GO:0044089(positive regulation of cellular component biogenesis);GO:0043228(non-membrane-bounded organelle);GO:0033…	NA
PC-3p-114792_66	BGI_novel_T001355	264	291	282	-48.5	-32.9	0.678351	10.5	2-4,290-288;7-14,285-278;15-18,274-271;19-24,269-264	1-1,291-291[UP5];5-6,287-286[SIL];x-x,277-275[BULt];x-x,270-270[BULt]	((((((.((((...((((((((..(((.&.)))..))))))))---))))-))))))	GGUGCGAGUCGGAAGCUUCAGGGAGAGA&ACUUCACCUGAAGU---CGAC-CGCACC	0	0	NA	NA	NA	1	32.684	4	0.497318	Output/R8h/cleaveLand_result/t_plot/PC-3p-114792_66_BGI_novel_T001355_282_TPlot.pdf	0	0	NA	NA	NA	0	32.684	0	6.3879e-15	9.59436e-15	yes	GO:2000112(regulation of cellular macromolecule biosynthetic process);GO:0044464(cell part);GO:0051246(regulation of protein metabolic process);GO:0044248(cellular catabolic process);GO:0043228(non-membrane-bounded organelle);GO:0005737(cytoplasm);GO:0019439(aromatic compound catabolic process);GO:0006139(nucleobase-containing compound metabolic process);GO:0043170(macromolecule metabolic process…	ko03018(RNA degradation)
PC-3p-114792_66	BGI_novel_T002926	2070	2096	2085	-48.5	-32.8	0.676289	8.5	1-5,2096-2092;6-9,2090-2087;11-21,2084-2074;22-24,2072-2070	x-x,2091-2091[BULt];10-10,2086-2085[AILt];x-x,2073-2073[BULt]	(((.(((((((((((..((((.(((((&)))))-))))-.)))))))))))-)))	GGUGGCGGUCGAUUUGGAGGUAGGAGU&ACUUC-ACCU-GAAGUCGACCGC-ACC	0	0	NA	NA	NA	0	0	NA	NA	NA	2	64.8361	2	0.226877	Output/R24h/cleaveLand_result/t_plot/PC-3p-114792_66_BGI_novel_T002926_2085_TPlot.pdf	0	0	64.8361	6.941e-29	3.45403e-28	yes	GO:1901265(nucleoside phosphate binding);GO:0097159(organic cyclic compound binding);GO:1901363(heterocyclic compound binding);GO:0005488(binding);GO:0000166(nucleotide binding);GO:0036094(small molecule binding);GO:0003676(nucleic acid binding)	NA
PC-3p-114792_66	BGI_novel_T002927	2067	2093	2082	-48.5	-32.8	0.676289	8.5	1-5,2093-2089;6-9,2087-2084;11-21,2081-2071;22-24,2069-2067	x-x,2088-2088[BULt];10-10,2083-2082[AILt];x-x,2070-2070[BULt]	(((.(((((((((((..((((.(((((&)))))-))))-.)))))))))))-)))	GGUGGCGGUCGAUUUGGAGGUAGGAGU&ACUUC-ACCU-GAAGUCGACCGC-ACC	0	0	NA	NA	NA	1	32.684	4	0.569629	Output/R8h/cleaveLand_result/t_plot/PC-3p-114792_66_BGI_novel_T002927_2082_TPlot.pdf	1	32.4181	4	0.582273	Output/R24h/cleaveLand_result/t_plot/PC-3p-114792_66_BGI_novel_T002927_2082_TPlot.pdf	0	32.684	32.4181	8.5335e-08	8.81903e-08	yes	GO:1901265(nucleoside phosphate binding);GO:0097159(organic cyclic compound binding);GO:1901363(heterocyclic compound binding);GO:0005488(binding);GO:0000166(nucleotide binding);GO:0036094(small molecule binding);GO:0003676(nucleic acid binding)	NA
PC-3p-114792_66	XM_016089737.2	1607	1637	1622	-48.5	-34.5	0.71134	15	1-7,1637-1631;8-22,1624-1610;23-24,1608-1607	x-x,1630-1625[BULt];x-x,1609-1609[BULt]	((.(((((((((((((((......(((((((&)))))))------)))))))))))))))-))	GGUUGUGGUUGACUUCAGUCAUUUGUGAGGU&ACUUCAC------CUGAAGUCGACCGCA-CC	0	0	NA	NA	NA	1	32.684	4	0.250562	Output/R8h/cleaveLand_result/t_plot/PC-3p-114792_66_XM_016089737.2_1622_TPlot.pdf	2	64.8361	2	0.0937009	Output/R24h/cleaveLand_result/t_plot/PC-3p-114792_66_XM_016089737.2_1622_TPlot.pdf	0	32.684	64.8361	9.0915e-15	1.03633e-14	yes	GO:0009059(macromolecule biosynthetic process);GO:0071704(organic substance metabolic process);GO:0009058(biosynthetic process);GO:0071840(cellular component organization or biogenesis);GO:0044264(cellular polysaccharide metabolic process);GO:0005976(polysaccharide metabolic process);GO:0071555(cell wall organization);GO:0009987(cellular process);GO:0044425(membrane part);GO:0071554(cell wall org…	NA
PC-3p-114792_66	XM_016097166.2	2067	2093	2082	-48.5	-32.8	0.676289	8.5	1-5,2093-2089;6-9,2087-2084;11-21,2081-2071;22-24,2069-2067	x-x,2088-2088[BULt];10-10,2083-2082[AILt];x-x,2070-2070[BULt]	(((.(((((((((((..((((.(((((&)))))-))))-.)))))))))))-)))	GGUGGCGGUCGAUUUGGAGGUAGGAGU&ACUUC-ACCU-GAAGUCGACCGC-ACC	0	0	NA	NA	NA	0	0	NA	NA	NA	3	97.2542	2	0.255586	Output/R24h/cleaveLand_result/t_plot/PC-3p-114792_66_XM_016097166.2_2082_TPlot.pdf	0	0	97.2542	5.7766e-43	9.1307e-42	yes	GO:1901265(nucleoside phosphate binding);GO:0097159(organic cyclic compound binding);GO:1901363(heterocyclic compound binding);GO:0005488(binding);GO:0000166(nucleotide binding);GO:0036094(small molecule binding);GO:0003676(nucleic acid binding)	NA
PC-3p-114792_66	XM_016097167.2	1935	1961	1950	-48.5	-32.8	0.676289	8.5	1-5,1961-1957;6-9,1955-1952;11-21,1949-1939;22-24,1937-1935	x-x,1956-1956[BULt];10-10,1951-1950[AILt];x-x,1938-1938[BULt]	(((.(((((((((((..((((.(((((&)))))-))))-.)))))))))))-)))	GGUGGCGGUCGAUUUGGAGGUAGGAGU&ACUUC-ACCU-GAAGUCGACCGC-ACC	0	0	NA	NA	NA	0	0	NA	NA	NA	3	97.2542	2	0.238491	Output/R24h/cleaveLand_result/t_plot/PC-3p-114792_66_XM_016097167.2_1950_TPlot.pdf	0	0	97.2542	5.7766e-43	9.1307e-42	yes	GO:1901265(nucleoside phosphate binding);GO:0097159(organic cyclic compound binding);GO:1901363(heterocyclic compound binding);GO:0005488(binding);GO:0000166(nucleotide binding);GO:0036094(small molecule binding);GO:0003676(nucleic acid binding)	NA
PC-3p-114792_66	XM_021128836.1	264	291	282	-48.5	-32.9	0.678351	10.5	2-4,290-288;7-14,285-278;15-18,274-271;19-24,269-264	1-1,291-291[UP5];5-6,287-286[SIL];x-x,277-275[BULt];x-x,270-270[BULt]	((((((.((((...((((((((..(((.&.)))..))))))))---))))-))))))	GGUGCGAGUCGGAAGCUUCAGGGAGAGA&ACUUCACCUGAAGU---CGAC-CGCACC	0	0	NA	NA	NA	0	0	NA	NA	NA	1	32.4181	4	0.474397	Output/R24h/cleaveLand_result/t_plot/PC-3p-114792_66_XM_021128836.1_282_TPlot.pdf	0	0	32.4181	8.3342e-15	9.59436e-15	yes	GO:2000112(regulation of cellular macromolecule biosynthetic process);GO:0044464(cell part);GO:0051246(regulation of protein metabolic process);GO:0044248(cellular catabolic process);GO:0043228(non-membrane-bounded organelle);GO:0005737(cytoplasm);GO:0019439(aromatic compound catabolic process);GO:0006139(nucleobase-containing compound metabolic process);GO:0043170(macromolecule metabolic process…	ko03018(RNA degradation)
PC-3p-114792_66	XM_021137498.1	2046	2072	2061	-48.5	-32.8	0.676289	8.5	1-5,2072-2068;6-9,2066-2063;11-21,2060-2050;22-24,2048-2046	x-x,2067-2067[BULt];10-10,2062-2061[AILt];x-x,2049-2049[BULt]	(((.(((((((((((..((((.(((((&)))))-))))-.)))))))))))-)))	GGUGGCGGUCGAUUUGGAGGUAGGAGU&ACUUC-ACCU-GAAGUCGACCGC-ACC	0	0	NA	NA	NA	0	0	NA	NA	NA	3	97.2542	2	0.232706	Output/R24h/cleaveLand_result/t_plot/PC-3p-114792_66_XM_021137498.1_2061_TPlot.pdf	0	0	97.2542	5.7766e-43	9.1307e-42	yes	GO:1901265(nucleoside phosphate binding);GO:0097159(organic cyclic compound binding);GO:1901363(heterocyclic compound binding);GO:0005488(binding);GO:0000166(nucleotide binding);GO:0036094(small molecule binding);GO:0003676(nucleic acid binding)	NA
PC-3p-114792_66	XM_021137499.1	2043	2069	2058	-48.5	-32.8	0.676289	8.5	1-5,2069-2065;6-9,2063-2060;11-21,2057-2047;22-24,2045-2043	x-x,2064-2064[BULt];10-10,2059-2058[AILt];x-x,2046-2046[BULt]	(((.(((((((((((..((((.(((((&)))))-))))-.)))))))))))-)))	GGUGGCGGUCGAUUUGGAGGUAGGAGU&ACUUC-ACCU-GAAGUCGACCGC-ACC	0	0	NA	NA	NA	0	0	NA	NA	NA	1	32.4181	4	0.601031	Output/R24h/cleaveLand_result/t_plot/PC-3p-114792_66_XM_021137499.1_2058_TPlot.pdf	0	0	32.4181	8.3342e-15	9.59436e-15	yes	GO:1901265(nucleoside phosphate binding);GO:0097159(organic cyclic compound binding);GO:1901363(heterocyclic compound binding);GO:0005488(binding);GO:0000166(nucleotide binding);GO:0036094(small molecule binding);GO:0003676(nucleic acid binding)	NA
PC-3p-115095_65	BGI_novel_T001871	1403	1428	1416	-39.4	-26.4	0.670051	11	2-8,1427-1421;9-20,1417-1406;22-23,1404-1403	1-1,1428-1428[UP5];x-x,1420-1418[BULt];21-21,1405-1405[SIL]	((.((((((((((((...(((((((.&.)))))))---)))))))))))).))	GAGAUGGAUUGGACCUAUCUCCGGUC&AAUCGGAG---GGUCCAAUUUGUGUU	0	0	NA	NA	NA	1	32.684	4	0.985236	Output/R8h/cleaveLand_result/t_plot/PC-3p-115095_65_BGI_novel_T001871_1416_TPlot.pdf	0	0	NA	NA	NA	0	32.684	0	6.3879e-15	9.59436e-15	yes	NA	NA
PC-3p-115095_65	BGI_novel_T001873	1448	1473	1461	-39.4	-26.4	0.670051	11	2-8,1472-1466;9-20,1462-1451;22-23,1449-1448	1-1,1473-1473[UP5];x-x,1465-1463[BULt];21-21,1450-1450[SIL]	((.((((((((((((...(((((((.&.)))))))---)))))))))))).))	GAGAUGGAUUGGACCUAUCUCCGGUC&AAUCGGAG---GGUCCAAUUUGUGUU	0	0	NA	NA	NA	0	0	NA	NA	NA	1	32.4181	4	0.983244	Output/R24h/cleaveLand_result/t_plot/PC-3p-115095_65_BGI_novel_T001873_1461_TPlot.pdf	0	0	32.4181	8.3342e-15	9.59436e-15	yes	NA	NA
PC-3p-115095_65	XM_016082637.2	1625	1647	1638	-39.4	-26	0.659898	7.5	3-4,1645-1644;6-23,1642-1625	1-2,1647-1646[UP5];5-5,1643-1643[SIL]	((((((((((((((((((.((..&..)).))))))))))))))))))	AACAUAAAUUGGACUCUUAGAGA&AAUCGGAGGGUCCAAUUUGUGUU	0	0	NA	NA	NA	0	0	NA	NA	NA	1	32.4181	4	0.997831	Output/R24h/cleaveLand_result/t_plot/PC-3p-115095_65_XM_016082637.2_1638_TPlot.pdf	0	0	32.4181	8.3342e-15	9.59436e-15	yes	GO:0003824(catalytic activity);GO:0016747(transferase activity, transferring acyl groups other than amino-acyl groups);GO:0016740(transferase activity);GO:0016746(transferase activity, transferring acyl groups)	ko00940(Phenylpropanoid biosynthesis);ko00945(Stilbenoid, diarylheptanoid and gingerol biosynthesis);ko00941(Flavonoid biosynthesis);ko01100(Metabolic pathways);ko01110(Biosynthesis of secondary metabolites)
PC-3p-115095_65	XM_016086346.2	1533	1555	1546	-39.4	-26.6	0.675127	6.5	2-18,1554-1538;21-23,1535-1533	1-1,1555-1555[UP5];19-20,1537-1536[SIL]	(((..(((((((((((((((((.&.)))))))))))))))))..)))	GACCAAGGUUGGAUCCUUCGAUG&AAUCGGAGGGUCCAAUUUGUGUU	3	118.807	2	0.557986	Output/R0h/cleaveLand_result/t_plot/PC-3p-115095_65_XM_016086346.2_1546_TPlot.pdf	0	0	NA	NA	NA	2	64.8361	2	0.67127	Output/R24h/cleaveLand_result/t_plot/PC-3p-115095_65_XM_016086346.2_1546_TPlot.pdf	118.807	0	64.8361	7.8198e-26	3.80356e-25	yes	GO:1901576(organic substance biosynthetic process);GO:0016053(organic acid biosynthetic process);GO:0009987(cellular process);GO:0008652(cellular amino acid biosynthetic process);GO:0016614(oxidoreductase activity, acting on CH-OH group of donors);GO:1901607(alpha-amino acid biosynthetic process);GO:0006520(cellular amino acid metabolic process);GO:0009069(serine family amino acid metabolic proce…	ko01230(Biosynthesis of amino acids);ko01100(Metabolic pathways);ko01200(Carbon metabolism);ko00260(Glycine, serine and threonine metabolism)
PC-3p-115095_65	XM_016086355.2	854	880	871	-39.4	-28.7	0.728426	6.5	1-14,880-867;15-23,862-854	x-x,866-863[BULt]	(((((((((....((((((((((((((&))))))))))))))----)))))))))	AAUAUAAGUGGGAUGGAUCCUCCGAUU&AAUCGGAGGGUCCA----AUUUGUGUU	1	39.6024	4	0.642962	Output/R0h/cleaveLand_result/t_plot/PC-3p-115095_65_XM_016086355.2_871_TPlot.pdf	1	32.684	4	0.711331	Output/R8h/cleaveLand_result/t_plot/PC-3p-115095_65_XM_016086355.2_871_TPlot.pdf	0	0	NA	NA	NA	39.6024	32.684	0	8.6245e-09	9.35023e-09	yes	NA	NA
PC-3p-115095_65	XM_016088755.2	1759	1781	1772	-39.4	-30.3	0.769036	10	5-17,1777-1765;19-22,1763-1760	1-4,1781-1778[UP5];18-18,1764-1764[SIL];23-23,1759-1759[UP3]	.((((.(((((((((((((....&....))))))))))))).)))).	UGCACCAGUUGGACCCUCCAAUG&AAUCGGAGGGUCCAAUUUGUGUU	1	39.6024	4	0.152548	Output/R0h/cleaveLand_result/t_plot/PC-3p-115095_65_XM_016088755.2_1772_TPlot.pdf	0	0	NA	NA	NA	0	0	NA	NA	NA	39.6024	0	0	6.3194e-18	1.52182e-17	yes	GO:0044237(cellular metabolic process);GO:0009987(cellular process);GO:0006793(phosphorus metabolic process);GO:0016772(transferase activity, transferring phosphorus-containing groups);GO:0016301(kinase activity);GO:0016310(phosphorylation);GO:0008152(metabolic process);GO:0006796(phosphate-containing compound metabolic process);GO:0016740(transferase activity);GO:0003824(catalytic activity);GO:0…	NA
PC-3p-115095_65	XM_016091321.2	324	346	337	-39.4	-27.9	0.708122	7.5	4-17,343-330;19-19,328-328;21-23,326-324	1-3,346-344[UP5];18-18,329-329[SIL];20-20,327-327[SIL]	(((.(.((((((((((((((...&...)))))))))))))).).)))	AACCCCGAUUGGACCCUCCGCCU&AAUCGGAGGGUCCAAUUUGUGUU	0	0	NA	NA	NA	0	0	NA	NA	NA	1	32.4181	4	0.804265	Output/R24h/cleaveLand_result/t_plot/PC-3p-115095_65_XM_016091321.2_337_TPlot.pdf	0	0	32.4181	8.3342e-15	9.59436e-15	yes	GO:0008270(zinc ion binding);GO:0006012(galactose metabolic process);GO:0043167(ion binding);GO:0008152(metabolic process);GO:0043169(cation binding);GO:0046872(metal ion binding);GO:0019318(hexose metabolic process);GO:0016740(transferase activity);GO:0003824(catalytic activity);GO:0070569(uridylyltransferase activity);GO:0016772(transferase activity, transferring phosphorus-containing groups);G…	ko01100(Metabolic pathways);ko00520(Amino sugar and nucleotide sugar metabolism);ko00052(Galactose metabolism)
PC-3p-115095_65	XM_016092063.2	914	936	927	-39.4	-25.7	0.652284	8.5	1-4,936-933;6-15,931-922;18-20,919-917	5-5,932-932[SIL];16-17,921-920[SIL];21-23,916-914[UP3]	...(((..((((((((((.((((&)))).))))))))))..)))...	UGAGCAUCUUGGACCCUUGGAUU&AAUCGGAGGGUCCAAUUUGUGUU	1	39.6024	4	0.998399	Output/R0h/cleaveLand_result/t_plot/PC-3p-115095_65_XM_016092063.2_927_TPlot.pdf	0	0	NA	NA	NA	0	0	NA	NA	NA	39.6024	0	0	6.3194e-18	1.52182e-17	yes	GO:0072528(pyrimidine-containing compound biosynthetic process);GO:0006139(nucleobase-containing compound metabolic process);GO:1901293(nucleoside phosphate biosynthetic process);GO:0006221(pyrimidine nucleotide biosynthetic process);GO:0097159(organic cyclic compound binding);GO:0005622(intracellular);GO:0016772(transferase activity, transferring phosphorus-containing groups);GO:0034641(cellular…	ko00240(Pyrimidine metabolism);ko01100(Metabolic pathways)
PC-3p-115095_65	XM_016095082.2	319	343	334	-39.4	-27.2	0.690355	9	2-5,342-339;7-16,337-328;17-23,325-319	1-1,343-343[UP5];6-6,338-338[SIL];x-x,327-326[BULt]	(((((((..((((((((((.((((.&.)))).))))))))))--)))))))	GGCGCAAAGGUUGGGCCUUGCGAUC&AAUCGGAGGGUCCAAU--UUGUGUU	0	0	NA	NA	NA	1	32.684	4	0.898253	Output/R8h/cleaveLand_result/t_plot/PC-3p-115095_65_XM_016095082.2_334_TPlot.pdf	0	0	NA	NA	NA	0	32.684	0	6.3879e-15	9.59436e-15	yes	GO:0043231(intracellular membrane-bounded organelle);GO:0044424(intracellular part);GO:0043169(cation binding);GO:0005634(nucleus);GO:0003676(nucleic acid binding);GO:0010468(regulation of gene expression);GO:2000112(regulation of cellular macromolecule biosynthetic process);GO:0005623(cell);GO:0044464(cell part);GO:2001141(regulation of RNA biosynthetic process);GO:0065007(biological regulation)…	NA
PC-3p-115095_65	XM_016095084.2	365	389	380	-39.4	-27.2	0.690355	9	2-5,388-385;7-16,383-374;17-23,371-365	1-1,389-389[UP5];6-6,384-384[SIL];x-x,373-372[BULt]	(((((((..((((((((((.((((.&.)))).))))))))))--)))))))	GGCGCAAAGGUUGGGCCUUGCGAUC&AAUCGGAGGGUCCAAU--UUGUGUU	0	0	NA	NA	NA	1	32.684	4	0.883765	Output/R8h/cleaveLand_result/t_plot/PC-3p-115095_65_XM_016095084.2_380_TPlot.pdf	0	0	NA	NA	NA	0	32.684	0	6.3879e-15	9.59436e-15	yes	GO:0043231(intracellular membrane-bounded organelle);GO:0044424(intracellular part);GO:0043169(cation binding);GO:0005634(nucleus);GO:0003676(nucleic acid binding);GO:0010468(regulation of gene expression);GO:2000112(regulation of cellular macromolecule biosynthetic process);GO:0005623(cell);GO:0044464(cell part);GO:2001141(regulation of RNA biosynthetic process);GO:0065007(biological regulation)…	NA
PC-3p-115095_65	XM_016095087.2	319	343	334	-39.4	-27.2	0.690355	9	2-5,342-339;7-16,337-328;17-23,325-319	1-1,343-343[UP5];6-6,338-338[SIL];x-x,327-326[BULt]	(((((((..((((((((((.((((.&.)))).))))))))))--)))))))	GGCGCAAAGGUUGGGCCUUGCGAUC&AAUCGGAGGGUCCAAU--UUGUGUU	1	39.6024	4	0.835089	Output/R0h/cleaveLand_result/t_plot/PC-3p-115095_65_XM_016095087.2_334_TPlot.pdf	0	0	NA	NA	NA	0	0	NA	NA	NA	39.6024	0	0	6.3194e-18	1.52182e-17	yes	GO:0043231(intracellular membrane-bounded organelle);GO:0044424(intracellular part);GO:0043169(cation binding);GO:0005634(nucleus);GO:0003676(nucleic acid binding);GO:0010468(regulation of gene expression);GO:2000112(regulation of cellular macromolecule biosynthetic process);GO:0005623(cell);GO:0044464(cell part);GO:2001141(regulation of RNA biosynthetic process);GO:0065007(biological regulation)…	NA
PC-3p-115095_65	XM_016095093.2	457	481	472	-39.4	-25.98	0.659391	11.5	4-13,478-469;16-22,464-458	1-3,481-479[UP5];14-15,468-465[AILt];23-23,457-457[UP3]	.(((((((....((((((((((...&...))))))))))--..))))))).	UACACAAGGGCAGGACCCUCUGUUU&AAUCGGAGGGUCC--AAUUUGUGUU	2	79.2048	3	0.334735	Output/R0h/cleaveLand_result/t_plot/PC-3p-115095_65_XM_016095093.2_472_TPlot.pdf	0	0	NA	NA	NA	0	0	NA	NA	NA	79.2048	0	0	3.9892e-35	3.86508e-34	yes	GO:0019222(regulation of metabolic process);GO:0000079(regulation of cyclin-dependent protein serine/threonine kinase activity);GO:0050790(regulation of catalytic activity);GO:0051174(regulation of phosphorus metabolic process);GO:1904029(regulation of cyclin-dependent protein kinase activity);GO:0051171(regulation of nitrogen compound metabolic process);GO:0031399(regulation of protein modificat…	ko01110(Biosynthesis of secondary metabolites);ko00630(Glyoxylate and dicarboxylate metabolism);ko01200(Carbon metabolism);ko01210(2-Oxocarboxylic acid metabolism);ko01100(Metabolic pathways);ko01230(Biosynthesis of amino acids);ko00020(Citrate cycle (TCA cycle))
PC-3p-115095_65	XM_016099628.2	3356	3377	3368	-39.4	-27	0.685279	9.5	4-14,3374-3364;16-18,3363-3361;20-23,3359-3356	1-3,3377-3375[UP5];15-15,x-x[BULq];19-19,3360-3360[SIL]	((((.(((-(((((((((((...&...))))))))))).))).))))	GACAGAGG-UGGACCCUCUGGAG&AAUCGGAGGGUCCAAUUUGUGUU	0	0	NA	NA	NA	0	0	NA	NA	NA	1	32.4181	4	0.933508	Output/R24h/cleaveLand_result/t_plot/PC-3p-115095_65_XM_016099628.2_3368_TPlot.pdf	0	0	32.4181	8.3342e-15	9.59436e-15	yes	GO:0003723(RNA binding);GO:0097159(organic cyclic compound binding);GO:1901363(heterocyclic compound binding);GO:0005488(binding);GO:0003676(nucleic acid binding)	ko03013(RNA transport);ko03015(mRNA surveillance pathway)
PC-3p-115095_65	XM_016100746.2	234	256	247	-39.4	-28.7	0.728426	9	5-14,252-243;16-23,241-234	1-4,256-253[UP5];15-15,242-242[SIL]	((((((((.((((((((((....&....)))))))))).))))))))	AACACAAAAUGGAUCCUCCUCCU&AAUCGGAGGGUCCAAUUUGUGUU	0	0	NA	NA	NA	0	0	NA	NA	NA	1	32.4181	4	0.730015	Output/R24h/cleaveLand_result/t_plot/PC-3p-115095_65_XM_016100746.2_247_TPlot.pdf	0	0	32.4181	8.3342e-15	9.59436e-15	yes	GO:1901564(organonitrogen compound metabolic process);GO:0003824(catalytic activity);GO:0019752(carboxylic acid metabolic process);GO:0009987(cellular process);GO:0006082(organic acid metabolic process);GO:0016740(transferase activity);GO:0044238(primary metabolic process);GO:0043436(oxoacid metabolic process);GO:0004084(branched-chain-amino-acid transaminase activity);GO:0016769(transferase acti…	ko00270(Cysteine and methionine metabolism);ko01110(Biosynthesis of secondary metabolites);ko00770(Pantothenate and CoA biosynthesis);ko01210(2-Oxocarboxylic acid metabolism);ko01100(Metabolic pathways);ko00280(Valine, leucine and isoleucine degradation);ko00290(Valine, leucine and isoleucine biosynthesis);ko01230(Biosynthesis of amino acids)
PC-3p-115095_65	XM_016101439.2	333	354	345	-39.4	-28.8	0.730964	7	1-13,354-342;17-21,339-335	14-16,341-340[AILq];22-23,334-333[UP3]	..(((((..-(((((((((((((&)))))))))))))...)))))..	GCCACGGCG-GGGCCCUCCGAUU&AAUCGGAGGGUCCAAUUUGUGUU	0	0	NA	NA	NA	1	32.684	4	0.691463	Output/R8h/cleaveLand_result/t_plot/PC-3p-115095_65_XM_016101439.2_345_TPlot.pdf	1	32.4181	4	0.704032	Output/R24h/cleaveLand_result/t_plot/PC-3p-115095_65_XM_016101439.2_345_TPlot.pdf	0	32.684	32.4181	8.5335e-08	8.81903e-08	yes	GO:0008270(zinc ion binding);GO:0043167(ion binding);GO:0031224(intrinsic component of membrane);GO:0044425(membrane part);GO:0005488(binding);GO:0046872(metal ion binding);GO:0043169(cation binding);GO:0016021(integral component of membrane);GO:0016020(membrane);GO:0046914(transition metal ion binding)	ko04141(Protein processing in endoplasmic reticulum)
PC-3p-115095_65	XM_016101888.2	1573	1603	1590	-39.4	-27	0.685279	14.5	2-9,1602-1595;10-15,1590-1585;16-23,1580-1573	1-1,1603-1603[UP5];x-x,1594-1591[BULt];x-x,1584-1581[BULt]	((((((((....((((((....((((((((.&.))))))))----))))))----))))))))	GACACAGGAGACUUGGACUAUACCUCCGAUC&AAUCGGAGG----GUCCAA----UUUGUGUU	2	79.2048	2	0.469076	Output/R0h/cleaveLand_result/t_plot/PC-3p-115095_65_XM_016101888.2_1590_TPlot.pdf	0	0	NA	NA	NA	0	0	NA	NA	NA	79.2048	0	0	3.9892e-35	3.86508e-34	yes	GO:0005975(carbohydrate metabolic process);GO:0004553(hydrolase activity, hydrolyzing O-glycosyl compounds);GO:0008152(metabolic process);GO:0044238(primary metabolic process);GO:0005576(extracellular region);GO:0009987(cellular process);GO:0071555(cell wall organization);GO:0016043(cellular component organization);GO:0071554(cell wall organization or biogenesis);GO:0071840(cellular component org…	ko01100(Metabolic pathways);ko00040(Pentose and glucuronate interconversions)
PC-3p-115095_65	XM_016105533.2	254	278	269	-39.4	-26.1	0.662437	10	3-6,276-273;8-17,271-262;18-23,259-254	1-2,278-277[UP5];7-7,272-272[SIL];x-x,261-260[BULt]	((((((..((((((((((.((((..&..)))).))))))))))--))))))	GACACAAAGAUUGGAUCCGUCGACU&AAUCGGAGGGUCCAAUU--UGUGUU	0	0	NA	NA	NA	0	0	NA	NA	NA	1	32.4181	4	0.997676	Output/R24h/cleaveLand_result/t_plot/PC-3p-115095_65_XM_016105533.2_269_TPlot.pdf	0	0	32.4181	8.3342e-15	9.59436e-15	yes	GO:0043167(ion binding);GO:0097159(organic cyclic compound binding);GO:1901681(sulfur compound binding);GO:0046872(metal ion binding);GO:0016831(carboxy-lyase activity);GO:0016830(carbon-carbon lyase activity);GO:0043168(anion binding);GO:0000287(magnesium ion binding);GO:0019842(vitamin binding);GO:0050662(coenzyme binding);GO:0003824(catalytic activity);GO:0043169(cation binding);GO:0036094(sma…	ko01110(Biosynthesis of secondary metabolites);ko00010(Glycolysis / Gluconeogenesis);ko01100(Metabolic pathways)
PC-3p-115095_65	XM_016108308.2	308	332	322	-39.4	-25.9	0.65736	9.5	3-8,330-325;9-13,323-319;16-19,316-313;20-23,311-308	1-2,332-331[UP5];x-x,324-324[BULt];14-15,318-317[SIL];x-x,312-312[BULt]	((((.((((..(((((.((((((..&..))))))-)))))..))))-))))	GGCGUCAAAGAGGACCUCUCCGAGC&AAUCGGAG-GGUCCAAUUUG-UGUU	1	39.6024	4	0.995347	Output/R0h/cleaveLand_result/t_plot/PC-3p-115095_65_XM_016108308.2_322_TPlot.pdf	0	0	NA	NA	NA	0	0	NA	NA	NA	39.6024	0	0	6.3194e-18	1.52182e-17	yes	NA	NA
PC-3p-115095_65	XM_016108425.2	1002	1024	1015	-39.4	-25.7	0.652284	12.5	6-9,1019-1016;11-23,1014-1002	1-5,1024-1020[UP5];10-10,1015-1015[SIL]	(((((((((((((.((((.....&.....)))).)))))))))))))	GACACAAAUUGGAGUCUCGUAUG&AAUCGGAGGGUCCAAUUUGUGUU	1	39.6024	4	0.998539	Output/R0h/cleaveLand_result/t_plot/PC-3p-115095_65_XM_016108425.2_1015_TPlot.pdf	0	0	NA	NA	NA	4	129.672	2	0.931894	Output/R24h/cleaveLand_result/t_plot/PC-3p-115095_65_XM_016108425.2_1015_TPlot.pdf	39.6024	0	129.672	1.0209e-34	9.72237e-34	yes	GO:0008194(UDP-glycosyltransferase activity);GO:0016758(transferase activity, transferring hexosyl groups);GO:0042285(xylosyltransferase activity);GO:0044038(cell wall macromolecule biosynthetic process);GO:0005976(polysaccharide metabolic process);GO:0009059(macromolecule biosynthetic process);GO:0005975(carbohydrate metabolic process);GO:0016763(transferase activity, transferring pentosyl group…	NA
PC-3p-115095_65	XM_016108471.2	799	823	814	-39.4	-27.1	0.687817	7.5	2-4,822-820;6-11,818-813;12-15,811-808;16-23,806-799	1-1,823-823[UP5];5-5,819-819[SIL];x-x,812-812[BULt];x-x,807-807[BULt]	((((((((.((((.((((((.(((.&.))).))))))-))))-))))))))	GACACAAACUUGGCACCCUUGGAUC&AAUCGGAGGGU-CCAA-UUUGUGUU	0	0	NA	NA	NA	0	0	NA	NA	NA	1	32.4181	4	0.923681	Output/R24h/cleaveLand_result/t_plot/PC-3p-115095_65_XM_016108471.2_814_TPlot.pdf	0	0	32.4181	8.3342e-15	9.59436e-15	yes	GO:0005576(extracellular region);GO:0043167(ion binding);GO:0004601(peroxidase activity);GO:0098754(detoxification);GO:0016209(antioxidant activity);GO:0006979(response to oxidative stress);GO:0042743(hydrogen peroxide metabolic process);GO:0016491(oxidoreductase activity);GO:0005488(binding);GO:0009056(catabolic process);GO:0003824(catalytic activity);GO:0046906(tetrapyrrole binding);GO:0098869(…	ko00940(Phenylpropanoid biosynthesis);ko01100(Metabolic pathways);ko01110(Biosynthesis of secondary metabolites)
PC-3p-115095_65	XM_021134214.1	1549	1571	1562	-39.4	-30.3	0.769036	10	5-17,1567-1555;19-22,1553-1550	1-4,1571-1568[UP5];18-18,1554-1554[SIL];23-23,1549-1549[UP3]	.((((.(((((((((((((....&....))))))))))))).)))).	UGCACCAGUUGGACCCUCCAAUG&AAUCGGAGGGUCCAAUUUGUGUU	1	39.6024	4	0.167992	Output/R0h/cleaveLand_result/t_plot/PC-3p-115095_65_XM_021134214.1_1562_TPlot.pdf	0	0	NA	NA	NA	0	0	NA	NA	NA	39.6024	0	0	6.3194e-18	1.52182e-17	yes	GO:0044237(cellular metabolic process);GO:0009987(cellular process);GO:0006793(phosphorus metabolic process);GO:0016772(transferase activity, transferring phosphorus-containing groups);GO:0016301(kinase activity);GO:0016310(phosphorylation);GO:0008152(metabolic process);GO:0006796(phosphate-containing compound metabolic process);GO:0016740(transferase activity);GO:0003824(catalytic activity);GO:0…	NA
PC-3p-115095_65	XM_021135221.1	1793	1818	1806	-39.4	-26.4	0.670051	11	2-8,1817-1811;9-20,1807-1796;22-23,1794-1793	1-1,1818-1818[UP5];x-x,1810-1808[BULt];21-21,1795-1795[SIL]	((.((((((((((((...(((((((.&.)))))))---)))))))))))).))	GAGAUGGAUUGGACCUAUCUCCGGUC&AAUCGGAG---GGUCCAAUUUGUGUU	0	0	NA	NA	NA	0	0	NA	NA	NA	1	32.4181	4	0.987852	Output/R24h/cleaveLand_result/t_plot/PC-3p-115095_65_XM_021135221.1_1806_TPlot.pdf	0	0	32.4181	8.3342e-15	9.59436e-15	yes	NA	NA
PC-3p-115095_65	XM_021135595.1	879	899	890	-39.4	-26.9	0.682741	7	2-10,898-890;12-14,889-887;16-22,886-880	1-1,899-899[UP5];11-11,x-x[BULq];15-15,x-x[BULq];23-23,879-879[UP3]	.(((((((-(((-(((((((((.&.))))))))).))).))))))).	UGCACAAG-UGG-CCCUUCGAUG&AAUCGGAGGGUCCAAUUUGUGUU	0	0	NA	NA	NA	1	32.684	4	0.937549	Output/R8h/cleaveLand_result/t_plot/PC-3p-115095_65_XM_021135595.1_890_TPlot.pdf	0	0	NA	NA	NA	0	32.684	0	6.3879e-15	9.59436e-15	yes	GO:0003824(catalytic activity);GO:0055114(oxidation-reduction process);GO:0016491(oxidoreductase activity);GO:0008152(metabolic process)	ko00790(Folate biosynthesis);ko00561(Glycerolipid metabolism);ko01100(Metabolic pathways);ko00040(Pentose and glucuronate interconversions);ko00051(Fructose and mannose metabolism);ko00052(Galactose metabolism)
PC-3p-115095_65	XM_021138446.1	288	310	301	-39.4	-26.12	0.662944	10	3-11,308-300;12-14,298-296;19-23,292-288	1-2,310-309[UP5];x-x,299-299[BULt];15-18,295-293[AILq]	(((((...-(((.(((((((((..&..)))))))))-)))....)))))	AACACUGG-UGGCACCCUCCGGCA&AAUCGGAGGGU-CCAAUUUGUGUU	0	0	NA	NA	NA	0	0	NA	NA	NA	1	32.4181	4	0.996059	Output/R24h/cleaveLand_result/t_plot/PC-3p-115095_65_XM_021138446.1_301_TPlot.pdf	0	0	32.4181	8.3342e-15	9.59436e-15	yes	NA	ko03050(Proteasome)
PC-3p-115095_65	XM_021138495.1	3237	3258	3249	-39.4	-27	0.685279	9.5	4-14,3255-3245;16-18,3244-3242;20-23,3240-3237	1-3,3258-3256[UP5];15-15,x-x[BULq];19-19,3241-3241[SIL]	((((.(((-(((((((((((...&...))))))))))).))).))))	GACAGAGG-UGGACCCUCUGGAG&AAUCGGAGGGUCCAAUUUGUGUU	0	0	NA	NA	NA	1	32.684	4	0.923747	Output/R8h/cleaveLand_result/t_plot/PC-3p-115095_65_XM_021138495.1_3249_TPlot.pdf	0	0	NA	NA	NA	0	32.684	0	6.3879e-15	9.59436e-15	yes	GO:0003723(RNA binding);GO:0097159(organic cyclic compound binding);GO:1901363(heterocyclic compound binding);GO:0005488(binding);GO:0003676(nucleic acid binding)	ko03013(RNA transport);ko03015(mRNA surveillance pathway)
PC-3p-115095_65	XM_021138496.1	3172	3193	3184	-39.4	-27	0.685279	9.5	4-14,3190-3180;16-18,3179-3177;20-23,3175-3172	1-3,3193-3191[UP5];15-15,x-x[BULq];19-19,3176-3176[SIL]	((((.(((-(((((((((((...&...))))))))))).))).))))	GACAGAGG-UGGACCCUCUGGAG&AAUCGGAGGGUCCAAUUUGUGUU	0	0	NA	NA	NA	1	32.684	4	0.922036	Output/R8h/cleaveLand_result/t_plot/PC-3p-115095_65_XM_021138496.1_3184_TPlot.pdf	1	32.4181	4	0.928764	Output/R24h/cleaveLand_result/t_plot/PC-3p-115095_65_XM_021138496.1_3184_TPlot.pdf	0	32.684	32.4181	8.5335e-08	8.81903e-08	yes	GO:0003723(RNA binding);GO:0097159(organic cyclic compound binding);GO:1901363(heterocyclic compound binding);GO:0005488(binding);GO:0003676(nucleic acid binding)	ko03013(RNA transport);ko03015(mRNA surveillance pathway)
PC-3p-116071_65	BGI_novel_T001056	1573	1596	1587	-37.3	-24.54	0.657909	13	1-3,1596-1594;9-24,1588-1573	4-8,1593-1589[SIL]	((((((((((((((((.....(((&))).....))))))))))))))))	AGUUUAAGGGGCUAGUUGAUGUGU&AUAAAAAUACUGGCCUCUUAGACU	1	39.6024	4	0.642962	Output/R0h/cleaveLand_result/t_plot/PC-3p-116071_65_BGI_novel_T001056_1587_TPlot.pdf	0	0	NA	NA	NA	0	0	NA	NA	NA	39.6024	0	0	6.3194e-18	1.52182e-17	yes	GO:0006412(translation);GO:0043170(macromolecule metabolic process);GO:0005737(cytoplasm);GO:0044271(cellular nitrogen compound biosynthetic process);GO:0034645(cellular macromolecule biosynthetic process);GO:0044422(organelle part);GO:0043604(amide biosynthetic process);GO:0006810(transport);GO:0005740(mitochondrial envelope);GO:0005215(transporter activity);GO:0005743(mitochondrial inner membra…	NA
PC-3p-116071_65	XM_016081948.2	924	947	938	-37.3	-24.54	0.657909	13	1-3,947-945;9-24,939-924	4-8,944-940[SIL]	((((((((((((((((.....(((&))).....))))))))))))))))	AGUUUAAGGGGCUAGUUGAUGUGU&AUAAAAAUACUGGCCUCUUAGACU	1	39.6024	4	0.649468	Output/R0h/cleaveLand_result/t_plot/PC-3p-116071_65_XM_016081948.2_938_TPlot.pdf	0	0	NA	NA	NA	0	0	NA	NA	NA	39.6024	0	0	6.3194e-18	1.52182e-17	yes	GO:0006412(translation);GO:0043170(macromolecule metabolic process);GO:0005737(cytoplasm);GO:0044271(cellular nitrogen compound biosynthetic process);GO:0034645(cellular macromolecule biosynthetic process);GO:0044422(organelle part);GO:0043604(amide biosynthetic process);GO:0006810(transport);GO:0005740(mitochondrial envelope);GO:0005215(transporter activity);GO:0005743(mitochondrial inner membra…	NA
PC-3p-116071_65	XM_016096891.2	330	351	342	-37.3	-24.6	0.659517	11.5	6-18,346-334;21-24,333-330	1-5,351-347[UP5];19-20,x-x[BULq]	((((--(((((((((((((.....&.....)))))))))))))..))))	AGUU--AGAGGCCAGUAUUAUUUU&AUAAAAAUACUGGCCUCUUAGACU	0	0	NA	NA	NA	2	65.368	2	0.33745	Output/R8h/cleaveLand_result/t_plot/PC-3p-116071_65_XM_016096891.2_342_TPlot.pdf	0	0	NA	NA	NA	0	65.368	0	4.0777e-29	2.60335e-28	yes	GO:0005618(cell wall);GO:0044444(cytoplasmic part);GO:0004565(beta-galactosidase activity);GO:0044464(cell part);GO:0005737(cytoplasm);GO:0015925(galactosidase activity);GO:0030312(external encapsulating structure);GO:0030246(carbohydrate binding);GO:0016787(hydrolase activity);GO:0016798(hydrolase activity, acting on glycosyl bonds);GO:0005623(cell);GO:0043227(membrane-bounded organelle);GO:0003…	ko00600(Sphingolipid metabolism);ko00604(Glycosphingolipid biosynthesis - ganglio series);ko01100(Metabolic pathways);ko00531(Glycosaminoglycan degradation);ko00511(Other glycan degradation);ko00052(Galactose metabolism)
PC-3p-116071_65	XM_016102029.2	849	872	863	-37.3	-26.4	0.707775	12.5	6-18,867-855;20-23,853-850	1-5,872-868[UP5];19-19,854-854[SIL];24-24,849-849[UP3]	.((((.(((((((((((((.....&.....))))))))))))).)))).	CGUUUCAGAGGCCAGUGUUGUGUA&AUAAAAAUACUGGCCUCUUAGACU	1	39.6024	4	0.152548	Output/R0h/cleaveLand_result/t_plot/PC-3p-116071_65_XM_016102029.2_863_TPlot.pdf	0	0	NA	NA	NA	0	0	NA	NA	NA	39.6024	0	0	6.3194e-18	1.52182e-17	yes	GO:0046903(secretion);GO:0051640(organelle localization);GO:0006904(vesicle docking involved in exocytosis);GO:0051234(establishment of localization);GO:0048278(vesicle docking);GO:0032940(secretion by cell);GO:0006887(exocytosis);GO:0009987(cellular process);GO:0140056(organelle localization by membrane tethering);GO:0016192(vesicle-mediated transport);GO:0051641(cellular localization);GO:002240…	NA
PC-3p-117208_64	BGI_novel_T002867	368	392	383	-39.9	-26	0.651629	16	8-14,385-379;15-24,377-368	1-7,392-386[UP5];x-x,378-378[BULt]	((((((((((.(((((((.......&.......)))))))-))))))))))	GUUGAUGGCUAGAGGGUCAAUUAGA&AUUUAACGACUCUC-GGCUAUCAAC	0	0	NA	NA	NA	1	32.684	4	0.981154	Output/R8h/cleaveLand_result/t_plot/PC-3p-117208_64_BGI_novel_T002867_383_TPlot.pdf	0	0	NA	NA	NA	0	32.684	0	6.3879e-15	9.59436e-15	yes	GO:0005840(ribosome);GO:0030529(intracellular ribonucleoprotein complex);GO:0005622(intracellular);GO:0032991(macromolecular complex);GO:0005737(cytoplasm);GO:1990904(ribonucleoprotein complex);GO:0043232(intracellular non-membrane-bounded organelle);GO:0044424(intracellular part);GO:0043229(intracellular organelle);GO:0005623(cell);GO:0044444(cytoplasmic part);GO:0043226(organelle);GO:0044464(ce…	ko03010(Ribosome)
PC-3p-117208_64	BGI_novel_T011301	2558	2584	2575	-39.9	-26.5	0.66416	9	1-2,2584-2583;5-11,2580-2574;12-18,2572-2566;19-24,2563-2558	3-4,2582-2581[SIL];x-x,2573-2573[BULt];x-x,2565-2564[BULt]	((((((..(((((((.(((((((..((&))..)))))))-)))))))--))))))	GUUGAUGAAGCCGAGAAGUUGUUUUAU&AUUUAACGACU-CUCGGCU--AUCAAC	0	0	NA	NA	NA	0	0	NA	NA	NA	1	32.4181	4	0.947155	Output/R24h/cleaveLand_result/t_plot/PC-3p-117208_64_BGI_novel_T011301_2575_TPlot.pdf	0	0	32.4181	8.3342e-15	9.59436e-15	yes	NA	NA
PC-3p-117208_64	BGI_novel_T011360	1213	1238	1229	-39.9	-26.1	0.654135	9.5	1-6,1238-1233;9-15,1230-1224;16-24,1221-1213	7-8,1232-1231[SIL];x-x,1223-1222[BULt]	(((((((((..(((((((..((((((&))))))..)))))))--)))))))))	GUUGAUGGCGACGAGGGUGAUUGGAU&AUUUAACGACUCUCG--GCUAUCAAC	1	39.6024	4	0.956929	Output/R0h/cleaveLand_result/t_plot/PC-3p-117208_64_BGI_novel_T011360_1229_TPlot.pdf	0	0	NA	NA	NA	0	0	NA	NA	NA	39.6024	0	0	6.3194e-18	1.52182e-17	yes	GO:0016070(RNA metabolic process);GO:0032501(multicellular organismal process);GO:0044424(intracellular part);GO:0048229(gametophyte development);GO:0006139(nucleobase-containing compound metabolic process);GO:0010467(gene expression);GO:0034641(cellular nitrogen compound metabolic process);GO:0008152(metabolic process);GO:0006396(RNA processing);GO:1901360(organic cyclic compound metabolic proce…	ko03008(Ribosome biogenesis in eukaryotes)
PC-3p-117208_64	XM_016086718.2	235	258	250	-39.9	-27.4	0.686717	7.5	2-8,257-251;10-18,250-242;20-24,239-235	1-1,258-258[UP5];9-9,x-x[BULq];19-19,241-240[AILt]	(((((..(((((((((-(((((((.&.))))))).)))))))))-.)))))	GUUGAGCAGCUGAGGG-CGUUGAAG&AUUUAACGACUCUCGGCU-AUCAAC	1	39.6024	4	0.852318	Output/R0h/cleaveLand_result/t_plot/PC-3p-117208_64_XM_016086718.2_250_TPlot.pdf	1	32.684	4	0.900485	Output/R8h/cleaveLand_result/t_plot/PC-3p-117208_64_XM_016086718.2_250_TPlot.pdf	0	0	NA	NA	NA	39.6024	32.684	0	8.6245e-09	9.35023e-09	yes	GO:0032991(macromolecular complex);GO:0005488(binding);GO:0016272(prefoldin complex);GO:0009987(cellular process);GO:0043234(protein complex);GO:0051082(unfolded protein binding);GO:0006457(protein folding);GO:0005515(protein binding)	NA
PC-3p-117208_64	XM_016087891.2	1647	1670	1661	-39.9	-32.9	0.824561	2.5	1-16,1670-1655;18-24,1653-1647	17-17,1654-1654[SIL]	(((((((.((((((((((((((((&)))))))))))))))).)))))))	GUUGAUAUCUGAGAGUCGUUAGAU&AUUUAACGACUCUCGGCUAUCAAC	1	39.6024	4	0.241088	Output/R0h/cleaveLand_result/t_plot/PC-3p-117208_64_XM_016087891.2_1661_TPlot.pdf	6	196.104	2	0.106198	Output/R8h/cleaveLand_result/t_plot/PC-3p-117208_64_XM_016087891.2_1661_TPlot.pdf	3	97.2542	2	0.107316	Output/R24h/cleaveLand_result/t_plot/PC-3p-117208_64_XM_016087891.2_1661_TPlot.pdf	39.6024	196.104	97.2542	3.0452e-25	1.42625e-24	yes	GO:0006807(nitrogen compound metabolic process);GO:0006508(proteolysis);GO:0044238(primary metabolic process);GO:0019538(protein metabolic process);GO:0030163(protein catabolic process);GO:1901564(organonitrogen compound metabolic process);GO:0008233(peptidase activity);GO:0003824(catalytic activity);GO:0004175(endopeptidase activity);GO:0070001(aspartic-type peptidase activity);GO:1901565(organo…	ko03010(Ribosome)
PC-3p-117208_64	XM_016100506.2	717	741	732	-39.9	-26.3	0.659148	16	7-14,735-728;15-21,726-720	1-6,741-736[UP5];x-x,727-727[BULt];22-24,719-717[UP3]	...(((((((.((((((((......&......))))))))-)))))))...	UUCGGUGGCCGGAGAGUCGGGACUC&AUUUAACGACUCUC-GGCUAUCAAC	0	0	NA	NA	NA	0	0	NA	NA	NA	1	32.4181	4	0.952889	Output/R24h/cleaveLand_result/t_plot/PC-3p-117208_64_XM_016100506.2_732_TPlot.pdf	0	0	32.4181	8.3342e-15	9.59436e-15	yes	GO:0016020(membrane);GO:0016021(integral component of membrane);GO:0016740(transferase activity);GO:0032259(methylation);GO:0008168(methyltransferase activity);GO:0044425(membrane part);GO:0008152(metabolic process);GO:0016741(transferase activity, transferring one-carbon groups);GO:0031224(intrinsic component of membrane);GO:0003824(catalytic activity)	NA
PC-3p-117208_64	XM_016102742.2	1314	1337	1328	-39.9	-27.4	0.686717	9.5	1-3,1337-1335;5-19,1333-1319	4-4,1334-1334[SIL];20-24,1318-1314[UP3]	.....(((((((((((((((.(((&))).))))))))))))))).....	CGUCUUGGCCGAGGGUCGUUUGAU&AUUUAACGACUCUCGGCUAUCAAC	4	158.41	3	0.138852	Output/R0h/cleaveLand_result/t_plot/PC-3p-117208_64_XM_016102742.2_1328_TPlot.pdf	4	130.736	3	0.207167	Output/R8h/cleaveLand_result/t_plot/PC-3p-117208_64_XM_016102742.2_1328_TPlot.pdf	1	32.4181	4	0.912403	Output/R24h/cleaveLand_result/t_plot/PC-3p-117208_64_XM_016102742.2_1328_TPlot.pdf	158.41	130.736	32.4181	1.7138e-18	6.99475e-18	yes	GO:0004013(adenosylhomocysteinase activity);GO:0034641(cellular nitrogen compound metabolic process);GO:0044281(small molecule metabolic process);GO:0044238(primary metabolic process);GO:0009116(nucleoside metabolic process);GO:0006534(cysteine metabolic process);GO:0071704(organic substance metabolic process);GO:0046128(purine ribonucleoside metabolic process);GO:0019752(carboxylic acid metaboli…	ko00270(Cysteine and methionine metabolism);ko01100(Metabolic pathways)
PC-3p-117208_64	XM_016115853.2	891	918	909	-39.9	-26.6	0.666667	12	3-13,916-906;14-23,901-892	1-2,918-917[UP5];x-x,905-902[BULt];24-24,891-891[UP3]	.((((((((((....(((((((((((..&..)))))))))))----)))))))))).	CUUGGUGGCCGGAAAAGGGUUGUUGAGA&AUUUAACGACUCU----CGGCUAUCAAC	0	0	NA	NA	NA	2	65.368	2	0.598736	Output/R8h/cleaveLand_result/t_plot/PC-3p-117208_64_XM_016115853.2_909_TPlot.pdf	0	0	NA	NA	NA	0	65.368	0	4.0777e-29	2.60335e-28	yes	GO:0044248(cellular catabolic process);GO:0009987(cellular process);GO:0098754(detoxification);GO:0042221(response to chemical);GO:0043167(ion binding);GO:0016684(oxidoreductase activity, acting on peroxide as acceptor);GO:0055114(oxidation-reduction process);GO:0004601(peroxidase activity);GO:0016209(antioxidant activity);GO:0006950(response to stress);GO:0098869(cellular oxidant detoxification)…	ko01100(Metabolic pathways);ko00940(Phenylpropanoid biosynthesis);ko01110(Biosynthesis of secondary metabolites)
PC-3p-117208_64	XM_021132296.1	1145	1170	1161	-39.9	-26.1	0.654135	9.5	1-6,1170-1165;9-15,1162-1156;16-24,1153-1145	7-8,1164-1163[SIL];x-x,1155-1154[BULt]	(((((((((..(((((((..((((((&))))))..)))))))--)))))))))	GUUGAUGGCGACGAGGGUGAUUGGAU&AUUUAACGACUCUCG--GCUAUCAAC	2	79.2048	0	0.0348428	Output/R0h/cleaveLand_result/t_plot/PC-3p-117208_64_XM_021132296.1_1161_TPlot.pdf	0	0	NA	NA	NA	0	0	NA	NA	NA	79.2048	0	0	3.9892e-35	3.86508e-34	yes	GO:0016070(RNA metabolic process);GO:0032501(multicellular organismal process);GO:0044424(intracellular part);GO:0048229(gametophyte development);GO:0006139(nucleobase-containing compound metabolic process);GO:0010467(gene expression);GO:0034641(cellular nitrogen compound metabolic process);GO:0008152(metabolic process);GO:0006396(RNA processing);GO:1901360(organic cyclic compound metabolic proce…	ko03008(Ribosome biogenesis in eukaryotes)
PC-3p-117208_64	XM_021137405.1	412	436	427	-39.9	-26	0.651629	16	8-14,429-423;15-24,421-412	1-7,436-430[UP5];x-x,422-422[BULt]	((((((((((.(((((((.......&.......)))))))-))))))))))	GUUGAUGGCUAGAGGGUCAAUUAGA&AUUUAACGACUCUC-GGCUAUCAAC	0	0	NA	NA	NA	1	32.684	4	0.981972	Output/R8h/cleaveLand_result/t_plot/PC-3p-117208_64_XM_021137405.1_427_TPlot.pdf	0	0	NA	NA	NA	0	32.684	0	6.3879e-15	9.59436e-15	yes	GO:0005840(ribosome);GO:0030529(intracellular ribonucleoprotein complex);GO:0005622(intracellular);GO:0032991(macromolecular complex);GO:0005737(cytoplasm);GO:1990904(ribonucleoprotein complex);GO:0043232(intracellular non-membrane-bounded organelle);GO:0044424(intracellular part);GO:0043229(intracellular organelle);GO:0005623(cell);GO:0044444(cytoplasmic part);GO:0043226(organelle);GO:0044464(ce…	ko03010(Ribosome)
PC-3p-117669_63	BGI_novel_T000210	1595	1616	1608	-38.4	-25.2	0.65625	8.5	3-7,1614-1610;9-13,1609-1605;15-24,1604-1595	1-2,1616-1615[UP5];8-8,x-x[BULq];14-14,x-x[BULq]	((((((((((-(((((-(((((..&..))))).))))).))))))))))	GGUGAAGUUG-CUUCA-GUGGACC&AUUUCAUAUGAAGUCGACUUCACC	0	0	NA	NA	NA	0	0	NA	NA	NA	1	32.4181	4	0.927108	Output/R24h/cleaveLand_result/t_plot/PC-3p-117669_63_BGI_novel_T000210_1608_TPlot.pdf	0	0	32.4181	8.3342e-15	9.59436e-15	yes	NA	NA
PC-3p-117669_63	XM_016081484.2	1194	1219	1209	-38.4	-26.1	0.679688	11.5	3-5,1217-1215;6-9,1213-1210;11-14,1208-1205;15-24,1203-1194	1-2,1219-1218[UP5];x-x,1214-1214[BULt];10-10,1209-1209[SIL];x-x,1204-1204[BULt]	((((((((((.((((.((((.(((..&..)))-)))).))))-))))))))))	GGUGAGGUCGUACUUGGUGUCGGAUG&AUUUC-AUAUGAAGU-CGACUUCACC	0	0	NA	NA	NA	1	32.684	4	0.806377	Output/R8h/cleaveLand_result/t_plot/PC-3p-117669_63_XM_016081484.2_1209_TPlot.pdf	0	0	NA	NA	NA	0	32.684	0	6.3879e-15	9.59436e-15	yes	GO:0016747(transferase activity, transferring acyl groups other than amino-acyl groups);GO:0003824(catalytic activity);GO:0016740(transferase activity);GO:0016746(transferase activity, transferring acyl groups)	NA
PC-3p-117669_63	XM_016088865.2	313	336	327	-38.4	-29.58	0.770312	8	1-5,336-332;9-24,328-313	6-8,331-329[SIL]	((((((((((((((((...(((((&)))))...))))))))))))))))	GGUGAAGUUGGCUUCAGAAGAGAU&AUUUCAUAUGAAGUCGACUUCACC	0	0	NA	NA	NA	2	65.368	2	0.139029	Output/R8h/cleaveLand_result/t_plot/PC-3p-117669_63_XM_016088865.2_327_TPlot.pdf	0	0	NA	NA	NA	0	65.368	0	4.0777e-29	2.60335e-28	yes	NA	NA
PC-3p-117669_63	XM_016089974.2	952	976	966	-38.4	-30.3	0.789062	7.5	1-7,976-970;9-15,967-961;17-24,959-952	8-8,969-968[AILt];16-16,960-960[SIL]	((((((((.(((((((..(((((((&)))))))-.))))))).))))))))	GGUGAAGUGGGCUUCAAGAUGGGAU&AUUUCAU-AUGAAGUCGACUUCACC	1	39.6024	4	0.254918	Output/R0h/cleaveLand_result/t_plot/PC-3p-117669_63_XM_016089974.2_966_TPlot.pdf	0	0	NA	NA	NA	0	0	NA	NA	NA	39.6024	0	0	6.3194e-18	1.52182e-17	yes	GO:0016020(membrane);GO:0031224(intrinsic component of membrane);GO:0044425(membrane part);GO:0016021(integral component of membrane)	NA
PC-3p-117669_63	XM_016095241.2	2256	2280	2271	-38.4	-25	0.651042	6.5	1-11,2280-2270;14-16,2267-2265;17-24,2263-2256	12-13,2269-2268[SIL];x-x,2264-2264[BULt]	((((((((.(((..(((((((((((&)))))))))))..)))-))))))))	GGUGAGGUAUGGAAUCAUAUGAGAU&AUUUCAUAUGAAGUCG-ACUUCACC	0	0	NA	NA	NA	0	0	NA	NA	NA	1	32.4181	4	0.951794	Output/R24h/cleaveLand_result/t_plot/PC-3p-117669_63_XM_016095241.2_2271_TPlot.pdf	0	0	32.4181	8.3342e-15	9.59436e-15	yes	GO:0017111(nucleoside-triphosphatase activity);GO:0003824(catalytic activity);GO:0016462(pyrophosphatase activity);GO:0016887(ATPase activity);GO:0042623(ATPase activity, coupled);GO:0016818(hydrolase activity, acting on acid anhydrides, in phosphorus-containing anhydrides);GO:0016817(hydrolase activity, acting on acid anhydrides);GO:0008568(microtubule-severing ATPase activity);GO:0016787(hydrol…	ko01100(Metabolic pathways);ko00500(Starch and sucrose metabolism)
PC-3p-117669_63	XM_016096850.2	532	555	546	-38.4	-27.4	0.713542	9.5	3-10,553-546;13-24,543-532	1-2,555-554[UP5];11-12,545-544[SIL]	((((((((((((..((((((((..&..))))))))..))))))))))))	GGUGGGGUUGACAACAUAUGGAUU&AUUUCAUAUGAAGUCGACUUCACC	0	0	NA	NA	NA	3	98.052	2	0.375957	Output/R8h/cleaveLand_result/t_plot/PC-3p-117669_63_XM_016096850.2_546_TPlot.pdf	0	0	NA	NA	NA	0	98.052	0	2.6011e-43	4.90923e-42	yes	GO:0008152(metabolic process);GO:0043414(macromolecule methylation);GO:1990259(histone-glutamine methyltransferase activity);GO:0034470(ncRNA processing);GO:0043628(ncRNA 3'-end processing);GO:0018364(peptidyl-glutamine methylation);GO:0031167(rRNA methylation);GO:0042054(histone methyltransferase activity);GO:0031974(membrane-enclosed lumen);GO:0019538(protein metabolic process);GO:0043144(snoRN…	ko03008(Ribosome biogenesis in eukaryotes)
PC-3p-117669_63	XM_016100780.2	218	239	231	-38.4	-25.5	0.664062	7.5	3-7,237-233;9-15,232-226;17-24,225-218	1-2,239-238[UP5];8-8,x-x[BULq];16-16,x-x[BULq]	((((((((-(((((((-(((((..&..))))).))))))).))))))))	GGUGGAGU-GACUUCA-AUGGAUC&AUUUCAUAUGAAGUCGACUUCACC	0	0	NA	NA	NA	0	0	NA	NA	NA	2	64.8361	2	0.534379	Output/R24h/cleaveLand_result/t_plot/PC-3p-117669_63_XM_016100780.2_231_TPlot.pdf	0	0	64.8361	6.941e-29	3.45403e-28	yes	GO:0022857(transmembrane transporter activity);GO:0008643(carbohydrate transport);GO:0015145(monosaccharide transmembrane transporter activity);GO:0046323(glucose import);GO:0051234(establishment of localization);GO:0016020(membrane);GO:0008324(cation transmembrane transporter activity);GO:0006811(ion transport);GO:0008645(hexose transport);GO:0015149(hexose transmembrane transporter activity);GO…	ko01100(Metabolic pathways);ko00500(Starch and sucrose metabolism)
PC-3p-117669_63	XM_021131035.1	1601	1623	1614	-38.4	-25.6	0.666667	9	4-13,1620-1611;15-24,1610-1601	1-3,1623-1621[UP5];14-14,x-x[BULq]	((((((((((-((((((((((...&...)))))))))).))))))))))	GGUGAAGUUG-UUUUAUGUGAUUC&AUUUCAUAUGAAGUCGACUUCACC	1	39.6024	4	0.812431	Output/R0h/cleaveLand_result/t_plot/PC-3p-117669_63_XM_021131035.1_1614_TPlot.pdf	0	0	NA	NA	NA	0	0	NA	NA	NA	39.6024	0	0	6.3194e-18	1.52182e-17	yes	GO:0044464(cell part);GO:0016407(acetyltransferase activity);GO:0031974(membrane-enclosed lumen);GO:0044444(cytoplasmic part);GO:0044429(mitochondrial part);GO:0009987(cellular process);GO:0005759(mitochondrial matrix);GO:0044237(cellular metabolic process);GO:0044281(small molecule metabolic process);GO:0016747(transferase activity, transferring acyl groups other than amino-acyl groups);GO:00197…	ko01110(Biosynthesis of secondary metabolites);ko00010(Glycolysis / Gluconeogenesis);ko01200(Carbon metabolism);ko01100(Metabolic pathways);ko00020(Citrate cycle (TCA cycle));ko00620(Pyruvate metabolism)
PC-3p-117903_63	XM_016089668.2	221	245	236	-31.1	-20.6	0.662379	10.5	4-10,242-236;12-23,233-222	1-3,245-243[UP5];11-11,235-234[AILt];24-24,221-221[UP3]	.((((((((((((..(((((((...&...)))))))-.)))))))))))).	UGUGUUCUGAUUAGAUUUAAUCACU&AACGAUUAAA-AUAAUUAGAACACC	0	0	NA	NA	NA	1	32.684	4	0.588309	Output/R8h/cleaveLand_result/t_plot/PC-3p-117903_63_XM_016089668.2_236_TPlot.pdf	0	0	NA	NA	NA	0	32.684	0	6.3879e-15	9.59436e-15	yes	NA	NA
PC-3p-117903_63	XM_016115252.2	772	795	786	-31.1	-24.1	0.77492	8.5	3-15,793-781;18-24,778-772	1-2,795-794[UP5];16-17,780-779[SIL]	(((((((..(((((((((((((..&..)))))))))))))..)))))))	GGUGUUCCUGUUGUUUUGGUCGAG&AACGAUUAAAAUAAUUAGAACACC	0	0	NA	NA	NA	0	0	NA	NA	NA	1	32.4181	4	0.0877918	Output/R24h/cleaveLand_result/t_plot/PC-3p-117903_63_XM_016115252.2_786_TPlot.pdf	0	0	32.4181	8.3342e-15	9.59436e-15	yes	GO:1901265(nucleoside phosphate binding);GO:0098588(bounding membrane of organelle);GO:0005488(binding);GO:0043227(membrane-bounded organelle);GO:0022857(transmembrane transporter activity);GO:0044446(intracellular organelle part);GO:0009507(chloroplast);GO:0071702(organic substance transport);GO:0044422(organelle part);GO:0097367(carbohydrate derivative binding);GO:0005515(protein binding);GO:00…	NA
PC-3p-118336_63	XM_016111193.2	12249	12274	12265	-43	-31.7	0.737209	9.5	4-19,12271-12256;20-24,12253-12249	1-3,12274-12272[UP5];x-x,12255-12254[BULt]	(((((..((((((((((((((((...&...))))))))))))))))--)))))	GCUCAGUGGUGCAGUUGAUUUGACAU&AAAUCAAGUCGACUGCACC--UGAGU	5	198.012	2	0.100146	Output/R0h/cleaveLand_result/t_plot/PC-3p-118336_63_XM_016111193.2_12265_TPlot.pdf	0	0	NA	NA	NA	2	64.8361	2	0.133934	Output/R24h/cleaveLand_result/t_plot/PC-3p-118336_63_XM_016111193.2_12265_TPlot.pdf	198.012	0	64.8361	3.0132e-51	8.02677e-50	yes	GO:0022618(ribonucleoprotein complex assembly);GO:0005524(ATP binding);GO:0005488(binding);GO:0022607(cellular component assembly);GO:0032559(adenyl ribonucleotide binding);GO:0016887(ATPase activity);GO:0005634(nucleus);GO:0032553(ribonucleotide binding);GO:0035639(purine ribonucleoside triphosphate binding);GO:0044085(cellular component biogenesis);GO:0036094(small molecule binding);GO:0071826(…	ko03008(Ribosome biogenesis in eukaryotes)
PC-3p-118336_63	XM_016113770.2	1641	1664	1654	-43	-29.2	0.67907	5.5	1-6,1664-1659;7-18,1657-1646;20-24,1645-1641	x-x,1658-1658[BULt];19-19,x-x[BULq]	(((((-((((((((((((.((((((&))))))-)))))))))))).)))))	GCUCA-GUGCAGUUGAUUCUGAUUU&AAAUCA-AGUCGACUGCACCUGAGU	0	0	NA	NA	NA	1	32.684	4	0.579072	Output/R8h/cleaveLand_result/t_plot/PC-3p-118336_63_XM_016113770.2_1654_TPlot.pdf	1	32.4181	4	0.591759	Output/R24h/cleaveLand_result/t_plot/PC-3p-118336_63_XM_016113770.2_1654_TPlot.pdf	0	32.684	32.4181	8.5335e-08	8.81903e-08	yes	GO:0070011(peptidase activity, acting on L-amino acid peptides);GO:0008233(peptidase activity);GO:1901564(organonitrogen compound metabolic process);GO:0044238(primary metabolic process);GO:0019538(protein metabolic process);GO:0003824(catalytic activity);GO:0006807(nitrogen compound metabolic process);GO:0016021(integral component of membrane);GO:0016787(hydrolase activity);GO:0004180(carboxypep…	NA
PC-3p-119396_62	BGI_novel_T011434	421	441	433	-37.9	-24.7	0.651715	6	2-6,440-436;8-11,435-432;14-24,431-421	1-1,441-441[UP5];7-7,x-x[BULq];12-13,x-x[BULq]	(((((((((((--((((-(((((.&.))))).))))..)))))))))))	AUUGGUUCAGU--GGUU-GGAUUC&AAAUCCGAACCAAACUGAACCAAU	1	39.6024	4	0.961429	Output/R0h/cleaveLand_result/t_plot/PC-3p-119396_62_BGI_novel_T011434_433_TPlot.pdf	0	0	NA	NA	NA	2	64.8361	2	0.738039	Output/R24h/cleaveLand_result/t_plot/PC-3p-119396_62_BGI_novel_T011434_433_TPlot.pdf	39.6024	0	64.8361	4.7251e-14	5.31115e-14	yes	GO:0003824(catalytic activity);GO:0016788(hydrolase activity, acting on ester bonds);GO:0016787(hydrolase activity);GO:0043167(ion binding);GO:0004722(protein serine/threonine phosphatase activity);GO:0005488(binding);GO:0004721(phosphoprotein phosphatase activity);GO:0016791(phosphatase activity);GO:0042578(phosphoric ester hydrolase activity);GO:0043169(cation binding);GO:0046872(metal ion bind…	NA
PC-3p-119396_62	XM_016077837.2	472	495	485	-37.9	-27	0.712401	7	2-8,494-488;10-18,485-477;20-24,476-472	1-1,495-495[UP5];9-9,487-486[AILt];19-19,x-x[BULq]	(((((-(((((((((..(((((((.&.)))))))-.))))))))).)))))	AUUGG-UCAGUUUGGAGUCGGGUUC&AAAUCCGA-ACCAAACUGAACCAAU	1	39.6024	4	0.554793	Output/R0h/cleaveLand_result/t_plot/PC-3p-119396_62_XM_016077837.2_485_TPlot.pdf	3	98.052	3	0.0918639	Output/R8h/cleaveLand_result/t_plot/PC-3p-119396_62_XM_016077837.2_485_TPlot.pdf	2	64.8361	3	0.0855263	Output/R24h/cleaveLand_result/t_plot/PC-3p-119396_62_XM_016077837.2_485_TPlot.pdf	39.6024	98.052	64.8361	2.9512e-06	3.02858e-06	yes	GO:0036094(small molecule binding);GO:0005515(protein binding);GO:0005488(binding);GO:0006457(protein folding);GO:0032553(ribonucleotide binding);GO:0043168(anion binding);GO:0032559(adenyl ribonucleotide binding);GO:0006950(response to stress);GO:0043167(ion binding);GO:0000166(nucleotide binding);GO:0009987(cellular process);GO:0017076(purine nucleotide binding);GO:0097159(organic cyclic compou…	ko04141(Protein processing in endoplasmic reticulum);ko04626(Plant-pathogen interaction)
PC-3p-119396_62	XM_016079227.2	247	271	262	-37.9	-25	0.659631	10.5	4-6,268-266;8-16,264-256;18-23,253-248	1-3,271-269[UP5];7-7,265-265[SIL];17-17,255-254[AILt];24-24,247-247[UP3]	.((((((..(((((((((.(((...&...))).)))))))))-.)))))).	UUUGGUUGUGGUUUGGUUGGGAGAA&AAAUCCGAACCAAACU-GAACCAAU	1	39.6024	4	0.946293	Output/R0h/cleaveLand_result/t_plot/PC-3p-119396_62_XM_016079227.2_262_TPlot.pdf	3	98.052	2	0.6958	Output/R8h/cleaveLand_result/t_plot/PC-3p-119396_62_XM_016079227.2_262_TPlot.pdf	2	64.8361	3	0.276086	Output/R24h/cleaveLand_result/t_plot/PC-3p-119396_62_XM_016079227.2_262_TPlot.pdf	39.6024	98.052	64.8361	2.9512e-06	3.02858e-06	yes	GO:0005623(cell);GO:0065007(biological regulation);GO:0050789(regulation of biological process);GO:0009987(cellular process);GO:0065008(regulation of biological quality);GO:0050794(regulation of cellular process);GO:0042592(homeostatic process);GO:0019725(cellular homeostasis);GO:0045454(cell redox homeostasis)	NA
PC-3p-119396_62	XM_016080366.2	2374	2396	2387	-37.9	-28.5	0.751979	7	3-12,2394-2385;15-16,2383-2382;18-24,2380-2374	1-2,2396-2395[UP5];13-14,2384-2384[AILq];17-17,2381-2381[SIL]	(((((((.((.-((((((((((..&..))))))))))..)).)))))))	GUUGGUUGGGG-UGGUUCGGAUGG&AAAUCCGAACCAAACUGAACCAAU	0	0	NA	NA	NA	0	0	NA	NA	NA	1	32.4181	4	0.30757	Output/R24h/cleaveLand_result/t_plot/PC-3p-119396_62_XM_016080366.2_2387_TPlot.pdf	0	0	32.4181	8.3342e-15	9.59436e-15	yes	GO:0003824(catalytic activity)	ko00052(Galactose metabolism)
PC-3p-119396_62	XM_016080625.2	1250	1273	1264	-37.9	-28.7	0.757256	10.5	4-11,1270-1263;14-22,1260-1252	1-3,1273-1271[UP5];12-13,1262-1261[SIL];23-24,1251-1250[UP3]	..(((((((((..((((((((...&...))))))))..)))))))))..	GAUGGUUCGGUGCGGUUCGGAAAA&AAAUCCGAACCAAACUGAACCAAU	1	39.6024	4	0.241088	Output/R0h/cleaveLand_result/t_plot/PC-3p-119396_62_XM_016080625.2_1264_TPlot.pdf	0	0	NA	NA	NA	0	0	NA	NA	NA	39.6024	0	0	6.3194e-18	1.52182e-17	yes	NA	NA
PC-3p-119396_62	XM_016083813.2	2220	2243	2234	-37.9	-26.4	0.69657	9	3-7,2241-2237;9-16,2235-2228;18-21,2226-2223	1-2,2243-2242[UP5];8-8,2236-2236[SIL];17-17,2227-2227[SIL];22-24,2222-2220[UP3]	...((((.((((((((.(((((..&..))))).)))))))).))))...	CGCGGUUGAGUUUGGUGCGGAUCA&AAAUCCGAACCAAACUGAACCAAU	2	79.2048	2	0.27539	Output/R0h/cleaveLand_result/t_plot/PC-3p-119396_62_XM_016083813.2_2234_TPlot.pdf	0	0	NA	NA	NA	0	0	NA	NA	NA	79.2048	0	0	3.9892e-35	3.86508e-34	yes	GO:0003824(catalytic activity);GO:0043170(macromolecule metabolic process);GO:0008233(peptidase activity);GO:0006807(nitrogen compound metabolic process);GO:0019538(protein metabolic process);GO:0016787(hydrolase activity);GO:0008152(metabolic process);GO:0004252(serine-type endopeptidase activity);GO:0071704(organic substance metabolic process);GO:0004175(endopeptidase activity);GO:0070011(pepti…	ko00520(Amino sugar and nucleotide sugar metabolism);ko01100(Metabolic pathways);ko04146(Peroxisome)
PC-3p-119396_62	XM_016103004.2	512	534	525	-37.9	-24.9	0.656992	12	6-13,529-522;15-22,521-514	1-5,534-530[UP5];14-14,x-x[BULq];23-24,513-512[UP3]	..((((((((-((((((((.....&.....)))))))).))))))))..	CAUGGUUCAG-UUGGUUCGUAGUU&AAAUCCGAACCAAACUGAACCAAU	0	0	NA	NA	NA	0	0	NA	NA	NA	3	97.2542	2	0.702072	Output/R24h/cleaveLand_result/t_plot/PC-3p-119396_62_XM_016103004.2_525_TPlot.pdf	0	0	97.2542	5.7766e-43	9.1307e-42	yes	NA	NA
PC-3p-119396_62	XM_016110937.2	1096	1120	1111	-37.9	-25.1	0.662269	10.5	3-12,1118-1109;13-17,1107-1103;19-21,1101-1099	1-2,1120-1119[UP5];x-x,1108-1108[BULt];18-18,1102-1102[SIL];22-24,1098-1096[UP3]	...(((.(((((.((((((((((..&..))))))))))-))))).)))...	AUAGGUCCGGUUCUGGUUCGGGUCG&AAAUCCGAACCA-AACUGAACCAAU	0	0	NA	NA	NA	4	130.736	2	0.654523	Output/R8h/cleaveLand_result/t_plot/PC-3p-119396_62_XM_016110937.2_1111_TPlot.pdf	3	97.2542	2	0.658592	Output/R24h/cleaveLand_result/t_plot/PC-3p-119396_62_XM_016110937.2_1111_TPlot.pdf	0	130.736	97.2542	4.3923e-27	2.1543e-26	yes	GO:0005488(binding);GO:0046872(metal ion binding);GO:0043167(ion binding);GO:0043169(cation binding)	NA
PC-3p-119396_62	XM_016112868.2	2671	2694	2685	-37.9	-25.9	0.683377	8.5	1-12,2694-2683;15-16,2680-2679;18-21,2677-2674	13-14,2682-2681[SIL];17-17,2678-2678[SIL];22-24,2673-2671[UP3]	...((((.((..((((((((((((&))))))))))))..)).))))...	AGGGGUUGGGGAUGGUUUGGGUUU&AAAUCCGAACCAAACUGAACCAAU	0	0	NA	NA	NA	1	32.684	4	0.88881	Output/R8h/cleaveLand_result/t_plot/PC-3p-119396_62_XM_016112868.2_2685_TPlot.pdf	0	0	NA	NA	NA	0	32.684	0	6.3879e-15	9.59436e-15	yes	GO:0044237(cellular metabolic process);GO:0005623(cell);GO:0019219(regulation of nucleobase-containing compound metabolic process);GO:0043226(organelle);GO:0009719(response to endogenous stimulus);GO:0010556(regulation of macromolecule biosynthetic process);GO:0005634(nucleus);GO:0090304(nucleic acid metabolic process);GO:0043231(intracellular membrane-bounded organelle);GO:0050896(response to st…	ko04075(Plant hormone signal transduction)
PC-3p-119396_62	XM_021126165.1	2666	2689	2680	-37.9	-25.9	0.683377	8.5	1-12,2689-2678;15-16,2675-2674;18-21,2672-2669	13-14,2677-2676[SIL];17-17,2673-2673[SIL];22-24,2668-2666[UP3]	...((((.((..((((((((((((&))))))))))))..)).))))...	AGGGGUUGGGGAUGGUUUGGGUUU&AAAUCCGAACCAAACUGAACCAAU	0	0	NA	NA	NA	1	32.684	4	0.878491	Output/R8h/cleaveLand_result/t_plot/PC-3p-119396_62_XM_021126165.1_2680_TPlot.pdf	0	0	NA	NA	NA	0	32.684	0	6.3879e-15	9.59436e-15	yes	GO:0044237(cellular metabolic process);GO:0005623(cell);GO:0019219(regulation of nucleobase-containing compound metabolic process);GO:0043226(organelle);GO:0009719(response to endogenous stimulus);GO:0010556(regulation of macromolecule biosynthetic process);GO:0005634(nucleus);GO:0090304(nucleic acid metabolic process);GO:0043231(intracellular membrane-bounded organelle);GO:0050896(response to st…	ko04075(Plant hormone signal transduction)
PC-3p-119396_62	XM_021126166.1	2619	2642	2633	-37.9	-25.9	0.683377	8.5	1-12,2642-2631;15-16,2628-2627;18-21,2625-2622	13-14,2630-2629[SIL];17-17,2626-2626[SIL];22-24,2621-2619[UP3]	...((((.((..((((((((((((&))))))))))))..)).))))...	AGGGGUUGGGGAUGGUUUGGGUUU&AAAUCCGAACCAAACUGAACCAAU	0	0	NA	NA	NA	1	32.684	4	0.89125	Output/R8h/cleaveLand_result/t_plot/PC-3p-119396_62_XM_021126166.1_2633_TPlot.pdf	0	0	NA	NA	NA	0	32.684	0	6.3879e-15	9.59436e-15	yes	GO:0044237(cellular metabolic process);GO:0005623(cell);GO:0019219(regulation of nucleobase-containing compound metabolic process);GO:0043226(organelle);GO:0009719(response to endogenous stimulus);GO:0010556(regulation of macromolecule biosynthetic process);GO:0005634(nucleus);GO:0090304(nucleic acid metabolic process);GO:0043231(intracellular membrane-bounded organelle);GO:0050896(response to st…	ko04075(Plant hormone signal transduction)
PC-3p-119826_61	XM_016080561.2	1018	1040	1032	-43.2	-28.52	0.660185	12	1-3,1040-1038;8-11,1034-1031;14-24,1028-1018	4-7,1037-1035[AILq];12-13,1030-1029[SIL]	(((((((((((..((((...-(((&)))....))))..)))))))))))	CUCAGGUGCAGCAGAGUCCG-GUG&CACGUAAAUUCGACUGCACCUGAG	1	39.6024	4	0.708355	Output/R0h/cleaveLand_result/t_plot/PC-3p-119826_61_XM_016080561.2_1032_TPlot.pdf	0	0	NA	NA	NA	0	0	NA	NA	NA	39.6024	0	0	6.3194e-18	1.52182e-17	yes	GO:0043170(macromolecule metabolic process);GO:0010033(response to organic substance);GO:0071367(cellular response to brassinosteroid stimulus);GO:0009741(response to brassinosteroid);GO:0016311(dephosphorylation);GO:0071407(cellular response to organic cyclic compound);GO:1901564(organonitrogen compound metabolic process);GO:0006807(nitrogen compound metabolic process);GO:0043412(macromolecule m…	NA
PC-3p-120365_61	BGI_novel_T005394	1030	1052	1043	-34.5	-22.7	0.657971	11.5	5-10,1048-1043;12-22,1042-1032	1-4,1052-1049[UP5];11-11,x-x[BULq];23-24,1031-1030[UP3]	..(((((((((((-((((((....&....)))))).)))))))))))..	AUUGUGUUGAUUC-CAGUUCUUCC&AAAUGAACUGAGAAUUAACACACA	0	0	NA	NA	NA	1	32.684	4	0.550101	Output/R8h/cleaveLand_result/t_plot/PC-3p-120365_61_BGI_novel_T005394_1043_TPlot.pdf	0	0	NA	NA	NA	0	32.684	0	6.3879e-15	9.59436e-15	yes	GO:0044267(cellular protein metabolic process);GO:1901564(organonitrogen compound metabolic process);GO:2000112(regulation of cellular macromolecule biosynthetic process);GO:0019538(protein metabolic process);GO:0050896(response to stimulus);GO:0043412(macromolecule modification);GO:0035556(intracellular signal transduction);GO:0016310(phosphorylation);GO:0044444(cytoplasmic part);GO:0003824(cata…	ko04075(Plant hormone signal transduction);ko04016(MAPK signaling pathway - plant)
PC-3p-120365_61	XM_016105009.2	1028	1050	1041	-34.5	-22.7	0.657971	11.5	5-10,1046-1041;12-22,1040-1030	1-4,1050-1047[UP5];11-11,x-x[BULq];23-24,1029-1028[UP3]	..(((((((((((-((((((....&....)))))).)))))))))))..	AUUGUGUUGAUUC-CAGUUCUUCC&AAAUGAACUGAGAAUUAACACACA	0	0	NA	NA	NA	1	32.684	4	0.540008	Output/R8h/cleaveLand_result/t_plot/PC-3p-120365_61_XM_016105009.2_1041_TPlot.pdf	0	0	NA	NA	NA	0	32.684	0	6.3879e-15	9.59436e-15	yes	GO:0044267(cellular protein metabolic process);GO:1901564(organonitrogen compound metabolic process);GO:2000112(regulation of cellular macromolecule biosynthetic process);GO:0019538(protein metabolic process);GO:0050896(response to stimulus);GO:0043412(macromolecule modification);GO:0035556(intracellular signal transduction);GO:0016310(phosphorylation);GO:0044444(cytoplasmic part);GO:0003824(cata…	ko04075(Plant hormone signal transduction);ko04016(MAPK signaling pathway - plant)
PC-3p-121413_60	BGI_novel_T001059	711	730	721	-32.3	-24.8	0.767802	3.5	1-19,730-712	20-20,711-711[UP3]	.(((((((((((((((((((&))))))))))))))))))).	CAGUUUUCUUUGUGUGAAAA&UUUUCACACGGAGAAGACUA	0	0	NA	NA	NA	0	0	NA	NA	NA	2	64.8361	3	0.0260697	Output/R24h/cleaveLand_result/t_plot/PC-3p-121413_60_BGI_novel_T001059_721_TPlot.pdf	0	0	64.8361	6.941e-29	3.45403e-28	yes	GO:0006952(defense response);GO:0006950(response to stress);GO:0050896(response to stimulus);GO:0009607(response to biotic stimulus)	NA
PC-3p-121413_60	BGI_novel_T001064	596	615	606	-32.3	-24.8	0.767802	3.5	1-19,615-597	20-20,596-596[UP3]	.(((((((((((((((((((&))))))))))))))))))).	CAGUUUUCUUUGUGUGAAAA&UUUUCACACGGAGAAGACUA	1	39.6024	4	0.167992	Output/R0h/cleaveLand_result/t_plot/PC-3p-121413_60_BGI_novel_T001064_606_TPlot.pdf	0	0	NA	NA	NA	0	0	NA	NA	NA	39.6024	0	0	6.3194e-18	1.52182e-17	yes	GO:0006950(response to stress);GO:0009607(response to biotic stimulus);GO:0006952(defense response);GO:0050896(response to stimulus)	NA
PC-3p-121413_60	BGI_novel_T001065	596	615	606	-32.3	-24.8	0.767802	3.5	1-19,615-597	20-20,596-596[UP3]	.(((((((((((((((((((&))))))))))))))))))).	CAGUUUUCUUUGUGUGAAAA&UUUUCACACGGAGAAGACUA	1	39.6024	4	0.268496	Output/R0h/cleaveLand_result/t_plot/PC-3p-121413_60_BGI_novel_T001065_606_TPlot.pdf	0	0	NA	NA	NA	0	0	NA	NA	NA	39.6024	0	0	6.3194e-18	1.52182e-17	yes	GO:0050896(response to stimulus);GO:0009607(response to biotic stimulus);GO:0006952(defense response);GO:0006950(response to stress)	NA
PC-3p-121413_60	BGI_novel_T001066	603	622	613	-32.3	-24.8	0.767802	3.5	1-19,622-604	20-20,603-603[UP3]	.(((((((((((((((((((&))))))))))))))))))).	CAGUUUUCUUUGUGUGAAAA&UUUUCACACGGAGAAGACUA	1	39.6024	4	0.152548	Output/R0h/cleaveLand_result/t_plot/PC-3p-121413_60_BGI_novel_T001066_613_TPlot.pdf	0	0	NA	NA	NA	0	0	NA	NA	NA	39.6024	0	0	6.3194e-18	1.52182e-17	yes	GO:0050896(response to stimulus);GO:0009607(response to biotic stimulus);GO:0006952(defense response);GO:0006950(response to stress)	NA
PC-3p-121413_60	BGI_novel_T001067	603	622	613	-32.3	-24.8	0.767802	3.5	1-19,622-604	20-20,603-603[UP3]	.(((((((((((((((((((&))))))))))))))))))).	CAGUUUUCUUUGUGUGAAAA&UUUUCACACGGAGAAGACUA	0	0	NA	NA	NA	0	0	NA	NA	NA	1	32.4181	4	0.29148	Output/R24h/cleaveLand_result/t_plot/PC-3p-121413_60_BGI_novel_T001067_613_TPlot.pdf	0	0	32.4181	8.3342e-15	9.59436e-15	yes	GO:0050896(response to stimulus);GO:0009607(response to biotic stimulus);GO:0006952(defense response);GO:0006950(response to stress)	NA
PC-3p-121413_60	BGI_novel_T002717	573	592	583	-32.3	-22.1	0.684211	5.5	1-11,592-582;13-14,580-579;16-20,577-573	12-12,581-581[SIL];15-15,578-578[SIL]	(((((.((.(((((((((((&))))))))))).)).)))))	UGGUCAUCGCUGUGUGGAAA&UUUUCACACGGAGAAGACUA	0	0	NA	NA	NA	1	32.684	4	0.993785	Output/R8h/cleaveLand_result/t_plot/PC-3p-121413_60_BGI_novel_T002717_583_TPlot.pdf	0	0	NA	NA	NA	0	32.684	0	6.3879e-15	9.59436e-15	yes	GO:0071704(organic substance metabolic process);GO:0000166(nucleotide binding);GO:0097159(organic cyclic compound binding);GO:0005622(intracellular);GO:0043231(intracellular membrane-bounded organelle);GO:0090304(nucleic acid metabolic process);GO:0030554(adenyl nucleotide binding);GO:0046483(heterocycle metabolic process);GO:0005524(ATP binding);GO:0006260(DNA replication);GO:0017076(purine nucl…	ko03410(Base excision repair);ko03420(Nucleotide excision repair);ko03030(DNA replication);ko03430(Mismatch repair)
PC-3p-121413_60	BGI_novel_T003807	673	693	684	-32.3	-21.3	0.659443	5.5	1-7,693-687;9-16,685-678;17-20,676-673	8-8,686-686[SIL];x-x,677-677[BULt]	((((.((((((((.(((((((&))))))).))))))))-))))	UAGUACUUCUUCGAGUGAGAG&UUUUCACACGGAGAAG-ACUA	1	39.6024	4	0.999646	Output/R0h/cleaveLand_result/t_plot/PC-3p-121413_60_BGI_novel_T003807_684_TPlot.pdf	0	0	NA	NA	NA	0	0	NA	NA	NA	39.6024	0	0	6.3194e-18	1.52182e-17	yes	GO:0016818(hydrolase activity, acting on acid anhydrides, in phosphorus-containing anhydrides);GO:0043170(macromolecule metabolic process);GO:1901363(heterocyclic compound binding);GO:0044464(cell part);GO:0004386(helicase activity);GO:1901360(organic cyclic compound metabolic process);GO:0006807(nitrogen compound metabolic process);GO:0005622(intracellular);GO:0032555(purine ribonucleotide bindi…	NA
PC-3p-121413_60	BGI_novel_T003808	673	693	684	-32.3	-21.3	0.659443	5.5	1-7,693-687;9-16,685-678;17-20,676-673	8-8,686-686[SIL];x-x,677-677[BULt]	((((.((((((((.(((((((&))))))).))))))))-))))	UAGUACUUCUUCGAGUGAGAG&UUUUCACACGGAGAAG-ACUA	1	39.6024	4	0.999439	Output/R0h/cleaveLand_result/t_plot/PC-3p-121413_60_BGI_novel_T003808_684_TPlot.pdf	0	0	NA	NA	NA	0	0	NA	NA	NA	39.6024	0	0	6.3194e-18	1.52182e-17	yes	GO:0016818(hydrolase activity, acting on acid anhydrides, in phosphorus-containing anhydrides);GO:0043170(macromolecule metabolic process);GO:1901363(heterocyclic compound binding);GO:0044464(cell part);GO:0004386(helicase activity);GO:1901360(organic cyclic compound metabolic process);GO:0006807(nitrogen compound metabolic process);GO:0005622(intracellular);GO:0032555(purine ribonucleotide bindi…	NA
PC-3p-121413_60	BGI_novel_T006686	813	832	823	-32.3	-22.6	0.69969	8.5	4-14,829-819;16-18,817-815	1-3,832-830[UP5];15-15,818-818[SIL];19-20,814-813[UP3]	..(((.(((((((((((...&...))))))))))).)))..	CUGUUGUCUCCGUGUGAUCU&UUUUCACACGGAGAAGACUA	0	0	NA	NA	NA	0	0	NA	NA	NA	1	32.4181	4	0.962558	Output/R24h/cleaveLand_result/t_plot/PC-3p-121413_60_BGI_novel_T006686_823_TPlot.pdf	0	0	32.4181	8.3342e-15	9.59436e-15	yes	GO:0006399(tRNA metabolic process);GO:0016891(endoribonuclease activity, producing 5'-phosphomonoesters);GO:0046483(heterocycle metabolic process);GO:0016787(hydrolase activity);GO:0071704(organic substance metabolic process);GO:0042780(tRNA 3'-end processing);GO:0090304(nucleic acid metabolic process);GO:0034414(tRNA 3'-trailer cleavage, endonucleolytic);GO:0016788(hydrolase activity, acting on …	ko03013(RNA transport)
PC-3p-121413_60	BGI_novel_T007919	550	571	562	-32.3	-21.5	0.665635	7.5	2-12,570-560;15-17,556-554;18-20,552-550	1-1,571-571[UP5];13-14,559-557[AILt];x-x,553-553[BULt]	(((.(((...(((((((((((.&.)))))))))))-..)))-)))	UGGAUCUGGAUCCGUGUGAGAU&UUUUCACACGGA-GAAGA-CUA	0	0	NA	NA	NA	1	32.684	4	0.999787	Output/R8h/cleaveLand_result/t_plot/PC-3p-121413_60_BGI_novel_T007919_562_TPlot.pdf	0	0	NA	NA	NA	0	32.684	0	6.3879e-15	9.59436e-15	yes	GO:0045454(cell redox homeostasis);GO:0050794(regulation of cellular process);GO:0019725(cellular homeostasis);GO:0050789(regulation of biological process);GO:0005623(cell);GO:0042592(homeostatic process);GO:0065007(biological regulation);GO:0009987(cellular process);GO:0065008(regulation of biological quality)	NA
PC-3p-121413_60	BGI_novel_T009415	1145	1167	1158	-32.3	-23.6	0.73065	10	4-14,1164-1154;15-18,1150-1147	1-3,1167-1165[UP5];x-x,1153-1151[BULt];19-20,1146-1145[UP3]	..((((...(((((((((((...&...)))))))))))---))))..	UCGUCUCAGUCUCCGUGUGACCU&UUUUCACACGGAGA---AGACUA	0	0	NA	NA	NA	1	32.684	4	0.758279	Output/R8h/cleaveLand_result/t_plot/PC-3p-121413_60_BGI_novel_T009415_1158_TPlot.pdf	0	0	NA	NA	NA	0	32.684	0	6.3879e-15	9.59436e-15	yes	GO:0005975(carbohydrate metabolic process);GO:0004649(poly(ADP-ribose) glycohydrolase activity);GO:0071704(organic substance metabolic process);GO:0003824(catalytic activity);GO:0008152(metabolic process);GO:0004553(hydrolase activity, hydrolyzing O-glycosyl compounds);GO:0044238(primary metabolic process);GO:0016798(hydrolase activity, acting on glycosyl bonds);GO:0016787(hydrolase activity)	NA
PC-3p-121413_60	BGI_novel_T011181	867	890	877	-32.3	-22.8	0.705882	12	1-7,890-884;8-19,879-868	x-x,883-880[BULt];20-20,867-867[UP3]	.((((((((((((....(((((((&)))))))----)))))))))))).	GGGUCUUCUUCGUGAGGGUGAAGG&UUUUCAC----ACGGAGAAGACUA	0	0	NA	NA	NA	0	0	NA	NA	NA	1	32.4181	4	0.927108	Output/R24h/cleaveLand_result/t_plot/PC-3p-121413_60_BGI_novel_T011181_877_TPlot.pdf	0	0	32.4181	8.3342e-15	9.59436e-15	yes	GO:0030554(adenyl nucleotide binding);GO:0043170(macromolecule metabolic process);GO:0036094(small molecule binding);GO:1901564(organonitrogen compound metabolic process);GO:0000166(nucleotide binding);GO:1901363(heterocyclic compound binding);GO:0032553(ribonucleotide binding);GO:0097367(carbohydrate derivative binding);GO:0035639(purine ribonucleoside triphosphate binding);GO:1901265(nucleoside…	ko01100(Metabolic pathways)
PC-3p-121413_60	XM_016076477.2	184	204	195	-32.3	-21.9	0.678019	8	2-12,203-193;13-15,191-189;17-18,187-186	1-1,204-204[UP5];x-x,192-192[BULt];16-16,188-188[SIL];19-20,185-184[UP3]	..((.(((.(((((((((((.&.)))))))))))-))).))..	UUGUGUUCUUCCGUGUGGAGC&UUUUCACACGGA-GAAGACUA	0	0	NA	NA	NA	2	65.368	3	0.420341	Output/R8h/cleaveLand_result/t_plot/PC-3p-121413_60_XM_016076477.2_195_TPlot.pdf	1	32.4181	4	0.99672	Output/R24h/cleaveLand_result/t_plot/PC-3p-121413_60_XM_016076477.2_195_TPlot.pdf	0	65.368	32.4181	5.8362e-15	9.59436e-15	yes	NA	NA
PC-3p-121413_60	XM_016078294.1	105	124	116	-32.3	-21	0.650155	8	3-7,122-118;9-15,117-111;16-18,109-107	1-2,124-123[UP5];8-8,x-x[BULq];x-x,110-110[BULt];19-20,106-105[UP3]	..(((.(((((((-(((((..&..))))).)))))))-)))..	CCGUCUUUCUCCG-GUGAACC&UUUUCACACGGAGAA-GACUA	0	0	NA	NA	NA	1	32.684	4	0.999981	Output/R8h/cleaveLand_result/t_plot/PC-3p-121413_60_XM_016078294.1_116_TPlot.pdf	0	0	NA	NA	NA	0	32.684	0	6.3879e-15	9.59436e-15	yes	NA	ko00970(Aminoacyl-tRNA biosynthesis)
PC-3p-121413_60	XM_016080261.2	1867	1886	1877	-32.3	-22.9	0.708978	10	5-13,1882-1874;16-19,1871-1868	1-4,1886-1883[UP5];14-15,1873-1872[SIL];20-20,1867-1867[UP3]	.((((..(((((((((....&....)))))))))..)))).	CAGUCGGCUCCGUGUGUCCU&UUUUCACACGGAGAAGACUA	1	39.6024	4	0.862792	Output/R0h/cleaveLand_result/t_plot/PC-3p-121413_60_XM_016080261.2_1877_TPlot.pdf	1	32.684	4	0.908937	Output/R8h/cleaveLand_result/t_plot/PC-3p-121413_60_XM_016080261.2_1877_TPlot.pdf	2	64.8361	2	0.558404	Output/R24h/cleaveLand_result/t_plot/PC-3p-121413_60_XM_016080261.2_1877_TPlot.pdf	39.6024	32.684	64.8361	0.0018997	0.00192232	yes	GO:0009987(cellular process);GO:0005623(cell);GO:1901265(nucleoside phosphate binding);GO:0016020(membrane);GO:0071944(cell periphery);GO:0016818(hydrolase activity, acting on acid anhydrides, in phosphorus-containing anhydrides);GO:0008568(microtubule-severing ATPase activity);GO:1901363(heterocyclic compound binding);GO:0016887(ATPase activity);GO:0032555(purine ribonucleotide binding);GO:00325…	ko04141(Protein processing in endoplasmic reticulum)
PC-3p-121413_60	XM_016080540.2	642	661	652	-32.3	-24.2	0.749226	5.5	2-8,660-654;10-20,652-642	1-1,661-661[UP5];9-9,653-653[SIL]	(((((((((((.(((((((.&.))))))).)))))))))))	UGGUCUUCUCUUUGUGGAAC&UUUUCACACGGAGAAGACUA	0	0	NA	NA	NA	2	65.368	2	0.212987	Output/R8h/cleaveLand_result/t_plot/PC-3p-121413_60_XM_016080540.2_652_TPlot.pdf	0	0	NA	NA	NA	0	65.368	0	4.0777e-29	2.60335e-28	yes	GO:0016747(transferase activity, transferring acyl groups other than amino-acyl groups);GO:0016746(transferase activity, transferring acyl groups);GO:0003824(catalytic activity);GO:0016740(transferase activity)	ko00943(Isoflavonoid biosynthesis);ko00944(Flavone and flavonol biosynthesis);ko00330(Arginine and proline metabolism)
PC-3p-121413_60	XM_016081466.2	1219	1238	1229	-32.3	-22.3	0.690402	5	2-10,1237-1229;12-20,1227-1219	1-1,1238-1238[UP5];11-11,1228-1228[SIL]	(((((((((.(((((((((.&.))))))))).)))))))))	UGGUUUUCUACGUGUGGAAC&UUUUCACACGGAGAAGACUA	0	0	NA	NA	NA	7	228.788	2	0.76059	Output/R8h/cleaveLand_result/t_plot/PC-3p-121413_60_XM_016081466.2_1229_TPlot.pdf	4	129.672	2	0.764375	Output/R24h/cleaveLand_result/t_plot/PC-3p-121413_60_XM_016081466.2_1229_TPlot.pdf	0	228.788	129.672	1.4069e-48	3.52976e-47	yes	GO:0004659(prenyltransferase activity);GO:0043227(membrane-bounded organelle);GO:0009507(chloroplast);GO:0005737(cytoplasm);GO:0043229(intracellular organelle);GO:0003824(catalytic activity);GO:0005623(cell);GO:0044424(intracellular part);GO:0044444(cytoplasmic part);GO:0016765(transferase activity, transferring alkyl or aryl (other than methyl) groups);GO:0009536(plastid);GO:0005622(intracellula…	ko01110(Biosynthesis of secondary metabolites);ko00130(Ubiquinone and other terpenoid-quinone biosynthesis);ko01100(Metabolic pathways)
PC-3p-121413_60	XM_016086460.1	1149	1170	1159	-32.3	-22	0.681115	8	2-6,1169-1165;7-8,1163-1162;9-19,1160-1150	1-1,1170-1170[UP5];x-x,1164-1164[BULt];x-x,1161-1161[BULt];20-20,1149-1149[UP3]	.(((((((((((.((.(((((.&.)))))-))-))))))))))).	GGGUUUUCUCCGAUGAUGAGAG&UUUUCA-CA-CGGAGAAGACUA	3	118.807	2	0.744936	Output/R0h/cleaveLand_result/t_plot/PC-3p-121413_60_XM_016086460.1_1159_TPlot.pdf	7	228.788	2	0.841379	Output/R8h/cleaveLand_result/t_plot/PC-3p-121413_60_XM_016086460.1_1159_TPlot.pdf	4	129.672	2	0.844602	Output/R24h/cleaveLand_result/t_plot/PC-3p-121413_60_XM_016086460.1_1159_TPlot.pdf	118.807	228.788	129.672	9.368e-11	1.0438e-10	yes	NA	NA
PC-3p-121413_60	XM_016093315.2	663	681	673	-32.3	-22.2	0.687307	6.5	2-5,680-677;7-11,676-672;13-19,670-664	1-1,681-681[UP5];6-6,x-x[BULq];12-12,671-671[SIL];20-20,663-663[UP3]	.(((((((.(((((-((((.&.)))).))))).))))))).	AGGUCUUCCCCGUG-GAAAU&UUUUCACACGGAGAAGACUA	0	0	NA	NA	NA	1	32.684	4	0.987637	Output/R8h/cleaveLand_result/t_plot/PC-3p-121413_60_XM_016093315.2_673_TPlot.pdf	0	0	NA	NA	NA	0	32.684	0	6.3879e-15	9.59436e-15	yes	GO:0016020(membrane);GO:0031224(intrinsic component of membrane);GO:0044425(membrane part);GO:0016021(integral component of membrane)	NA
PC-3p-121413_60	XM_016095001.2	653	672	663	-32.3	-21.7	0.671827	12	6-18,667-655	1-5,672-668[UP5];19-20,654-653[UP3]	..(((((((((((((.....&.....)))))))))))))..	CUGUCUUCUCUGUGUUCCUC&UUUUCACACGGAGAAGACUA	1	39.6024	4	0.996952	Output/R0h/cleaveLand_result/t_plot/PC-3p-121413_60_XM_016095001.2_663_TPlot.pdf	0	0	NA	NA	NA	1	32.4181	4	0.99928	Output/R24h/cleaveLand_result/t_plot/PC-3p-121413_60_XM_016095001.2_663_TPlot.pdf	39.6024	0	32.4181	8.8481e-09	9.41666e-09	yes	GO:0016020(membrane);GO:0031224(intrinsic component of membrane);GO:0016021(integral component of membrane);GO:0044425(membrane part)	NA
PC-3p-121413_60	XM_016096963.2	1334	1352	1344	-32.3	-21.5	0.665635	8	2-5,1351-1348;7-17,1347-1337	1-1,1352-1352[UP5];6-6,x-x[BULq];18-20,1336-1334[UP3]	...(((((((((((-((((.&.)))).)))))))))))...	UUCUCUUCUCCGUG-GGAGC&UUUUCACACGGAGAAGACUA	1	39.6024	4	0.998951	Output/R0h/cleaveLand_result/t_plot/PC-3p-121413_60_XM_016096963.2_1344_TPlot.pdf	0	0	NA	NA	NA	0	0	NA	NA	NA	39.6024	0	0	6.3194e-18	1.52182e-17	yes	GO:0016020(membrane);GO:0015075(ion transmembrane transporter activity);GO:0005623(cell);GO:0031224(intrinsic component of membrane);GO:0055085(transmembrane transport);GO:0016021(integral component of membrane);GO:0015112(nitrate transmembrane transporter activity);GO:0006811(ion transport);GO:0005886(plasma membrane);GO:0015706(nitrate transport);GO:0008509(anion transmembrane transporter activ…	ko00910(Nitrogen metabolism)
PC-3p-121413_60	XM_016097602.2	799	819	809	-32.3	-21.6	0.668731	9	2-6,818-814;7-9,812-810;11-18,808-801	1-1,819-819[UP5];x-x,813-813[BULt];10-10,809-809[SIL];19-20,800-799[UP3]	..((((((((.(((.(((((.&.)))))-))).))))))))..	GCGUCUUCUCGGUGCUGAGGU&UUUUCA-CACGGAGAAGACUA	2	79.2048	2	0.851996	Output/R0h/cleaveLand_result/t_plot/PC-3p-121413_60_XM_016097602.2_809_TPlot.pdf	2	65.368	2	0.923826	Output/R8h/cleaveLand_result/t_plot/PC-3p-121413_60_XM_016097602.2_809_TPlot.pdf	0	0	NA	NA	NA	79.2048	65.368	0	7.4316e-17	1.77155e-16	yes	GO:0044283(small molecule biosynthetic process);GO:0009308(amine metabolic process);GO:0046219(indolalkylamine biosynthetic process);GO:0046483(heterocycle metabolic process);GO:0016835(carbon-oxygen lyase activity);GO:0006568(tryptophan metabolic process);GO:0006725(cellular aromatic compound metabolic process);GO:0071704(organic substance metabolic process);GO:0046394(carboxylic acid biosynthet…	ko01100(Metabolic pathways);ko00260(Glycine, serine and threonine metabolism);ko01230(Biosynthesis of amino acids);ko01110(Biosynthesis of secondary metabolites);ko00400(Phenylalanine, tyrosine and tryptophan biosynthesis)
PC-3p-121413_60	XM_016101719.2	2431	2450	2441	-32.3	-24.5	0.758514	4.5	1-8,2450-2443;10-20,2441-2431	9-9,2442-2442[SIL]	(((((((((((.((((((((&)))))))).)))))))))))	UGGUUUUCUCCUUGUGAGAG&UUUUCACACGGAGAAGACUA	1	39.6024	4	0.402473	Output/R0h/cleaveLand_result/t_plot/PC-3p-121413_60_XM_016101719.2_2441_TPlot.pdf	3	98.052	2	0.189069	Output/R8h/cleaveLand_result/t_plot/PC-3p-121413_60_XM_016101719.2_2441_TPlot.pdf	0	0	NA	NA	NA	39.6024	98.052	0	9.3205e-24	4.28717e-23	yes	GO:0003825(alpha,alpha-trehalose-phosphate synthase (UDP-forming) activity);GO:0016791(phosphatase activity);GO:0005984(disaccharide metabolic process);GO:0005975(carbohydrate metabolic process);GO:0034637(cellular carbohydrate biosynthetic process);GO:0016051(carbohydrate biosynthetic process);GO:0006796(phosphate-containing compound metabolic process);GO:0004805(trehalose-phosphatase activity);…	ko01100(Metabolic pathways);ko00500(Starch and sucrose metabolism)
PC-3p-121413_60	XM_016101722.2	2346	2365	2356	-32.3	-24.5	0.758514	4.5	1-8,2365-2358;10-20,2356-2346	9-9,2357-2357[SIL]	(((((((((((.((((((((&)))))))).)))))))))))	UGGUUUUCUCCUUGUGAGAG&UUUUCACACGGAGAAGACUA	0	0	NA	NA	NA	0	0	NA	NA	NA	1	32.4181	4	0.486334	Output/R24h/cleaveLand_result/t_plot/PC-3p-121413_60_XM_016101722.2_2356_TPlot.pdf	0	0	32.4181	8.3342e-15	9.59436e-15	yes	GO:0003825(alpha,alpha-trehalose-phosphate synthase (UDP-forming) activity);GO:0016791(phosphatase activity);GO:0005984(disaccharide metabolic process);GO:0005975(carbohydrate metabolic process);GO:0034637(cellular carbohydrate biosynthetic process);GO:0016051(carbohydrate biosynthetic process);GO:0006796(phosphate-containing compound metabolic process);GO:0004805(trehalose-phosphatase activity);…	ko01100(Metabolic pathways);ko00500(Starch and sucrose metabolism)
PC-3p-121413_60	XM_016103125.2	552	572	562	-32.3	-21.1	0.653251	11	4-7,569-566;9-20,563-552	1-3,572-570[UP5];8-8,565-564[AILt]	((((((((((((..((((...&...))))-.))))))))))))	UGGUUUUCUCCGCCGUGGCCU&UUUUCAC-ACGGAGAAGACUA	0	0	NA	NA	NA	0	0	NA	NA	NA	1	32.4181	4	0.999979	Output/R24h/cleaveLand_result/t_plot/PC-3p-121413_60_XM_016103125.2_562_TPlot.pdf	0	0	32.4181	8.3342e-15	9.59436e-15	yes	GO:0016020(membrane);GO:0016021(integral component of membrane);GO:0044425(membrane part);GO:0031224(intrinsic component of membrane)	NA
PC-3p-121413_60	XM_016105533.2	417	441	427	-32.3	-22.1	0.684211	17	4-7,438-435;8-18,429-419	1-3,441-439[UP5];x-x,434-430[BULt];19-20,418-417[UP3]	..(((((((((((.....((((...&...))))-----)))))))))))..	ACGUCUUCUCCGUCCCCGGUGACUU&UUUUCAC-----ACGGAGAAGACUA	0	0	NA	NA	NA	2	65.368	3	0.403601	Output/R8h/cleaveLand_result/t_plot/PC-3p-121413_60_XM_016105533.2_427_TPlot.pdf	0	0	NA	NA	NA	0	65.368	0	4.0777e-29	2.60335e-28	yes	GO:0043167(ion binding);GO:0097159(organic cyclic compound binding);GO:1901681(sulfur compound binding);GO:0046872(metal ion binding);GO:0016831(carboxy-lyase activity);GO:0016830(carbon-carbon lyase activity);GO:0043168(anion binding);GO:0000287(magnesium ion binding);GO:0019842(vitamin binding);GO:0050662(coenzyme binding);GO:0003824(catalytic activity);GO:0043169(cation binding);GO:0036094(sma…	ko01110(Biosynthesis of secondary metabolites);ko00010(Glycolysis / Gluconeogenesis);ko01100(Metabolic pathways)
PC-3p-121413_60	XM_016108783.2	11107	11125	11116	-32.3	-22.2	0.687307	7.5	4-16,11122-11110;18-19,11109-11108	1-3,11125-11123[UP5];17-17,x-x[BULq];20-20,11107-11107[UP3]	.((-(((((((((((((...&...))))))))))))).)).	CAG-CUUUUCCGUGUGAUGA&UUUUCACACGGAGAAGACUA	0	0	NA	NA	NA	1	32.684	4	0.988173	Output/R8h/cleaveLand_result/t_plot/PC-3p-121413_60_XM_016108783.2_11116_TPlot.pdf	0	0	NA	NA	NA	0	32.684	0	6.3879e-15	9.59436e-15	yes	GO:0006725(cellular aromatic compound metabolic process);GO:0046483(heterocycle metabolic process);GO:1990234(transferase complex);GO:0018205(peptidyl-lysine modification);GO:0006281(DNA repair);GO:0044424(intracellular part);GO:0016570(histone modification);GO:0071840(cellular component organization or biogenesis);GO:0006793(phosphorus metabolic process);GO:0016772(transferase activity, transfer…	NA
PC-3p-121413_60	XM_016109676.2	991	1009	1001	-32.3	-22.1	0.684211	7	1-9,1009-1001;12-19,999-992	10-11,1000-1000[AILq];20-20,991-991[UP3]	.((((((((.-(((((((((&)))))))))..)))))))).	AAGUCUUCUG-GUGUGGAGA&UUUUCACACGGAGAAGACUA	0	0	NA	NA	NA	0	0	NA	NA	NA	1	32.4181	4	0.994563	Output/R24h/cleaveLand_result/t_plot/PC-3p-121413_60_XM_016109676.2_1001_TPlot.pdf	0	0	32.4181	8.3342e-15	9.59436e-15	yes	GO:0006399(tRNA metabolic process);GO:0016891(endoribonuclease activity, producing 5'-phosphomonoesters);GO:0046483(heterocycle metabolic process);GO:0016787(hydrolase activity);GO:0071704(organic substance metabolic process);GO:0042780(tRNA 3'-end processing);GO:0090304(nucleic acid metabolic process);GO:0034414(tRNA 3'-trailer cleavage, endonucleolytic);GO:0016788(hydrolase activity, acting on …	ko03013(RNA transport)
PC-3p-121413_60	XM_016117363.2	2811	2829	2821	-32.3	-21.8	0.674923	6.5	1-7,2829-2823;9-18,2822-2813	8-8,x-x[BULq];19-20,2812-2811[UP3]	..((((((((((-(((((((&))))))).))))))))))..	CUGUCUUUUCUG-GUGAGAA&UUUUCACACGGAGAAGACUA	1	39.6024	4	0.995833	Output/R0h/cleaveLand_result/t_plot/PC-3p-121413_60_XM_016117363.2_2821_TPlot.pdf	0	0	NA	NA	NA	0	0	NA	NA	NA	39.6024	0	0	6.3194e-18	1.52182e-17	yes	NA	ko04144(Endocytosis)
PC-3p-121413_60	XM_021125706.1	3673	3696	3683	-32.3	-21.78	0.674303	13.5	2-8,3695-3689;10-19,3683-3674	1-1,3696-3696[UP5];9-9,3688-3684[AILt];20-20,3673-3673[UP3]	.((((((((((.....(((((((.&.)))))))----.)))))))))).	GGGUCUUCUCCACCUAUGUGGAAU&UUUUCACA----CGGAGAAGACUA	0	0	NA	NA	NA	0	0	NA	NA	NA	1	32.4181	4	0.999029	Output/R24h/cleaveLand_result/t_plot/PC-3p-121413_60_XM_021125706.1_3683_TPlot.pdf	0	0	32.4181	8.3342e-15	9.59436e-15	yes	GO:0018130(heterocycle biosynthetic process);GO:0016817(hydrolase activity, acting on acid anhydrides);GO:0044464(cell part);GO:0043227(membrane-bounded organelle);GO:0043226(organelle);GO:0032991(macromolecular complex);GO:0033554(cellular response to stress);GO:0097367(carbohydrate derivative binding);GO:0044260(cellular macromolecule metabolic process);GO:0071840(cellular component organizatio…	NA
PC-3p-121413_60	XM_021140877.1	1411	1430	1421	-32.3	-23.7	0.733746	6	2-17,1429-1414	1-1,1430-1430[UP5];18-20,1413-1411[UP3]	...((((((((((((((((.&.))))))))))))))))...	UGAUCUUCUUCGUGUGAAGU&UUUUCACACGGAGAAGACUA	1	39.6024	4	0.655856	Output/R0h/cleaveLand_result/t_plot/PC-3p-121413_60_XM_021140877.1_1421_TPlot.pdf	0	0	NA	NA	NA	0	0	NA	NA	NA	39.6024	0	0	6.3194e-18	1.52182e-17	yes	GO:0008276(protein methyltransferase activity);GO:0016278(lysine N-methyltransferase activity);GO:0018026(peptidyl-lysine monomethylation);GO:0009987(cellular process);GO:1901564(organonitrogen compound metabolic process);GO:0006464(cellular protein modification process);GO:0044238(primary metabolic process);GO:0036211(protein modification process);GO:0043170(macromolecule metabolic process);GO:0…	ko00310(Lysine degradation)
PC-3p-122043_60	XM_016082554.2	1567	1590	1581	-37.3	-26.4	0.707775	8.5	1-9,1590-1582;11-18,1580-1573;20-23,1571-1568	10-10,1581-1581[SIL];19-19,1572-1572[SIL];24-24,1567-1567[UP3]	.((((.((((((((.(((((((((&))))))))).)))))))).)))).	UUGUGGGUGCGUUCGGGUUCUUGU&AUAGGAACUGGAACGUACAUAUAU	0	0	NA	NA	NA	0	0	NA	NA	NA	1	32.4181	4	0.338663	Output/R24h/cleaveLand_result/t_plot/PC-3p-122043_60_XM_016082554.2_1581_TPlot.pdf	0	0	32.4181	8.3342e-15	9.59436e-15	yes	GO:0005215(transporter activity);GO:0022857(transmembrane transporter activity);GO:0015291(secondary active transmembrane transporter activity);GO:0006811(ion transport);GO:0006817(phosphate ion transport);GO:0051234(establishment of localization);GO:0031224(intrinsic component of membrane);GO:0055085(transmembrane transport);GO:0016020(membrane);GO:0015698(inorganic anion transport);GO:0022804(a…	NA
PC-3p-122748_59	BGI_novel_T007568	816	840	831	-43.4	-28.7	0.66129	8.5	2-11,839-830;12-16,828-824;19-23,821-817	1-1,840-840[UP5];x-x,829-829[BULt];17-18,823-822[SIL];24-24,816-816[UP3]	.(((((..(((((.((((((((((.&.))))))))))-)))))..))))).	UGGGAUGAAGGUGAUAGUGGACUUG&AAAGUCCACUG-CACCUGAGUUUCU	0	0	NA	NA	NA	1	32.684	4	0.983865	Output/R8h/cleaveLand_result/t_plot/PC-3p-122748_59_BGI_novel_T007568_831_TPlot.pdf	0	0	NA	NA	NA	0	32.684	0	6.3879e-15	9.59436e-15	yes	GO:0044877(macromolecular complex binding);GO:0004338(glucan exo-1,3-beta-glucosidase activity);GO:0007010(cytoskeleton organization);GO:0030029(actin filament-based process);GO:0005488(binding);GO:0006996(organelle organization);GO:0030036(actin cytoskeleton organization);GO:0032403(protein complex binding);GO:0008152(metabolic process);GO:0016798(hydrolase activity, acting on glycosyl bonds);GO…	ko04626(Plant-pathogen interaction);ko00500(Starch and sucrose metabolism);ko04016(MAPK signaling pathway - plant)
PC-3p-122748_59	BGI_novel_T007569	2610	2634	2625	-43.4	-28.7	0.66129	8.5	2-11,2633-2624;12-16,2622-2618;19-23,2615-2611	1-1,2634-2634[UP5];x-x,2623-2623[BULt];17-18,2617-2616[SIL];24-24,2610-2610[UP3]	.(((((..(((((.((((((((((.&.))))))))))-)))))..))))).	UGGGAUGAAGGUGAUAGUGGACUUG&AAAGUCCACUG-CACCUGAGUUUCU	0	0	NA	NA	NA	2	65.368	2	0.753314	Output/R8h/cleaveLand_result/t_plot/PC-3p-122748_59_BGI_novel_T007569_2625_TPlot.pdf	0	0	NA	NA	NA	0	65.368	0	4.0777e-29	2.60335e-28	yes	GO:0044877(macromolecular complex binding);GO:0004338(glucan exo-1,3-beta-glucosidase activity);GO:0007010(cytoskeleton organization);GO:0030029(actin filament-based process);GO:0005488(binding);GO:0006996(organelle organization);GO:0030036(actin cytoskeleton organization);GO:0032403(protein complex binding);GO:0008152(metabolic process);GO:0016798(hydrolase activity, acting on glycosyl bonds);GO…	ko04626(Plant-pathogen interaction);ko00500(Starch and sucrose metabolism);ko04016(MAPK signaling pathway - plant)
PC-3p-122748_59	XM_016076239.2	1529	1554	1545	-43.4	-28.5	0.656682	8	3-12,1552-1543;15-18,1540-1537;19-22,1535-1532;23-24,1530-1529	1-2,1554-1553[UP5];13-14,1542-1541[SIL];x-x,1536-1536[BULt];x-x,1531-1531[BULt]	((.((((.((((..((((((((((..&..))))))))))..))))-))))-))	AGAAAACAUCAGAGGCAGUGGGCUAU&AAAGUCCACUGCACCUGA-GUUU-CU	0	0	NA	NA	NA	1	32.684	4	0.989875	Output/R8h/cleaveLand_result/t_plot/PC-3p-122748_59_XM_016076239.2_1545_TPlot.pdf	0	0	NA	NA	NA	0	32.684	0	6.3879e-15	9.59436e-15	yes	GO:1901360(organic cyclic compound metabolic process);GO:0006520(cellular amino acid metabolic process);GO:0044238(primary metabolic process);GO:0046483(heterocycle metabolic process);GO:0043170(macromolecule metabolic process);GO:0034641(cellular nitrogen compound metabolic process);GO:0043043(peptide biosynthetic process);GO:0032559(adenyl ribonucleotide binding);GO:0035639(purine ribonucleosid…	ko00970(Aminoacyl-tRNA biosynthesis)
PC-3p-122748_59	XM_016085420.2	287	311	302	-43.4	-28.42	0.654839	10	3-11,309-301;15-24,296-287	1-2,311-310[UP5];12-14,300-297[AILt]	((((((((((....(((((((((..&..)))))))))-...))))))))))	GGGAACUCAGUACUCAGUGGACUCU&AAAGUCCACUG-CACCUGAGUUUCU	2	79.2048	3	0.25528	Output/R0h/cleaveLand_result/t_plot/PC-3p-122748_59_XM_016085420.2_302_TPlot.pdf	0	0	NA	NA	NA	0	0	NA	NA	NA	79.2048	0	0	3.9892e-35	3.86508e-34	yes	GO:0016791(phosphatase activity);GO:0006793(phosphorus metabolic process);GO:0042578(phosphoric ester hydrolase activity);GO:0009987(cellular process);GO:0006796(phosphate-containing compound metabolic process);GO:0016311(dephosphorylation);GO:0003993(acid phosphatase activity);GO:0016787(hydrolase activity);GO:0008152(metabolic process);GO:0016788(hydrolase activity, acting on ester bonds);GO:00…	ko03010(Ribosome);ko04016(MAPK signaling pathway - plant)
PC-3p-122748_59	XM_016090370.2	476	498	489	-43.4	-31.32	0.721659	5.5	2-15,497-484;20-24,480-476	1-1,498-498[UP5];16-19,483-481[AILq]	(((((...-((((((((((((((.&.))))))))))))))....)))))	AGAGAAAU-GGUGCAGUGGACUUA&AAAGUCCACUGCACCUGAGUUUCU	0	0	NA	NA	NA	2	65.368	2	0.291281	Output/R8h/cleaveLand_result/t_plot/PC-3p-122748_59_XM_016090370.2_489_TPlot.pdf	0	0	NA	NA	NA	0	65.368	0	4.0777e-29	2.60335e-28	yes	GO:1905368(peptidase complex);GO:0005623(cell);GO:0000502(proteasome complex);GO:0005622(intracellular);GO:0044464(cell part);GO:0043234(protein complex);GO:1902494(catalytic complex);GO:1905369(endopeptidase complex);GO:0044424(intracellular part);GO:0032991(macromolecular complex)	ko03050(Proteasome)
PC-3p-122748_59	XM_016093321.2	472	495	485	-43.4	-29.5	0.679724	6	2-6,494-490;7-12,488-483;14-16,482-480;18-24,478-472	1-1,495-495[UP5];x-x,489-489[BULt];13-13,x-x[BULq];17-17,479-479[SIL]	(((((((.(((-((((((.(((((.&.)))))-)))))).))).)))))))	AGAAACUGAGG-GCAGUGAGAUUUG&AAAGUC-CACUGCACCUGAGUUUCU	1	39.6024	4	0.893939	Output/R0h/cleaveLand_result/t_plot/PC-3p-122748_59_XM_016093321.2_485_TPlot.pdf	0	0	NA	NA	NA	0	0	NA	NA	NA	39.6024	0	0	6.3194e-18	1.52182e-17	yes	GO:0030554(adenyl nucleotide binding);GO:0035639(purine ribonucleoside triphosphate binding);GO:0032559(adenyl ribonucleotide binding);GO:1901363(heterocyclic compound binding);GO:0005524(ATP binding);GO:0017076(purine nucleotide binding);GO:1901265(nucleoside phosphate binding);GO:0032555(purine ribonucleotide binding);GO:0043168(anion binding);GO:0036094(small molecule binding);GO:0005488(bindi…	ko03420(Nucleotide excision repair)
PC-3p-122748_59	XM_016093396.2	1388	1413	1404	-43.4	-29	0.668203	10	5-13,1409-1401;14-19,1399-1394;20-24,1392-1388	1-4,1413-1410[UP5];x-x,1400-1400[BULt];x-x,1393-1393[BULt]	(((((.((((((.(((((((((....&....)))))))))-))))))-)))))	AGAGAGUUCAGGCUGCAGUGGAAGAA&AAAGUCCACUGCA-CCUGAG-UUUCU	1	39.6024	4	0.94112	Output/R0h/cleaveLand_result/t_plot/PC-3p-122748_59_XM_016093396.2_1404_TPlot.pdf	0	0	NA	NA	NA	0	0	NA	NA	NA	39.6024	0	0	6.3194e-18	1.52182e-17	yes	NA	ko03013(RNA transport)
PC-3p-122748_59	XM_016103177.2	1106	1128	1119	-43.4	-32	0.737327	8.5	4-16,1125-1113;19-24,1111-1106	1-3,1128-1126[UP5];17-18,1112-1112[AILq]	((((((.-(((((((((((((...&...)))))))))))))..))))))	GGAAAUG-GGGUGCAGUGGACAAU&AAAGUCCACUGCACCUGAGUUUCU	0	0	NA	NA	NA	2	65.368	2	0.269742	Output/R8h/cleaveLand_result/t_plot/PC-3p-122748_59_XM_016103177.2_1119_TPlot.pdf	0	0	NA	NA	NA	0	65.368	0	4.0777e-29	2.60335e-28	yes	GO:0016787(hydrolase activity);GO:0070011(peptidase activity, acting on L-amino acid peptides);GO:0003824(catalytic activity);GO:0006508(proteolysis);GO:0004175(endopeptidase activity);GO:0019538(protein metabolic process);GO:0008152(metabolic process);GO:1901564(organonitrogen compound metabolic process);GO:0070001(aspartic-type peptidase activity);GO:0006807(nitrogen compound metabolic process)…	ko03010(Ribosome)
PC-3p-122748_59	XM_016112388.2	867	891	882	-43.4	-28.7	0.66129	8.5	2-11,890-881;12-16,879-875;19-23,872-868	1-1,891-891[UP5];x-x,880-880[BULt];17-18,874-873[SIL];24-24,867-867[UP3]	.(((((..(((((.((((((((((.&.))))))))))-)))))..))))).	UGGGAUGAAGGUGAUAGUGGACUUG&AAAGUCCACUG-CACCUGAGUUUCU	0	0	NA	NA	NA	1	32.684	4	0.982755	Output/R8h/cleaveLand_result/t_plot/PC-3p-122748_59_XM_016112388.2_882_TPlot.pdf	0	0	NA	NA	NA	0	32.684	0	6.3879e-15	9.59436e-15	yes	GO:0044877(macromolecular complex binding);GO:0004338(glucan exo-1,3-beta-glucosidase activity);GO:0007010(cytoskeleton organization);GO:0030029(actin filament-based process);GO:0005488(binding);GO:0006996(organelle organization);GO:0030036(actin cytoskeleton organization);GO:0032403(protein complex binding);GO:0008152(metabolic process);GO:0016798(hydrolase activity, acting on glycosyl bonds);GO…	ko04626(Plant-pathogen interaction);ko00500(Starch and sucrose metabolism);ko04016(MAPK signaling pathway - plant)
PC-3p-122748_59	XM_016115598.2	465	489	479	-43.4	-30.6	0.705069	12	4-9,486-481;11-16,478-473;18-24,471-465	1-3,489-487[UP5];10-10,480-479[AILt];17-17,472-472[SIL]	(((((((.((((((..((((((...&...))))))-.)))))).)))))))	AGGAACUGGGGUGUUCGUGGACAGA&AAAGUCCAC-UGCACCUGAGUUUCU	0	0	NA	NA	NA	0	0	NA	NA	NA	1	32.4181	4	0.864467	Output/R24h/cleaveLand_result/t_plot/PC-3p-122748_59_XM_016115598.2_479_TPlot.pdf	0	0	32.4181	8.3342e-15	9.59436e-15	yes	GO:0048037(cofactor binding);GO:0016903(oxidoreductase activity, acting on the aldehyde or oxo group of donors);GO:0005996(monosaccharide metabolic process);GO:0051287(NAD binding);GO:0016491(oxidoreductase activity);GO:0050662(coenzyme binding);GO:0005488(binding);GO:1901265(nucleoside phosphate binding);GO:1901363(heterocyclic compound binding);GO:0006006(glucose metabolic process);GO:0071704(o…	ko01100(Metabolic pathways);ko00710(Carbon fixation in photosynthetic organisms);ko01200(Carbon metabolism)
PC-3p-122748_59	XM_016117041.2	886	917	908	-43.4	-29.1	0.670507	16.5	4-16,914-902;18-18,900-900;19-23,891-887	1-3,917-915[UP5];17-17,901-901[SIL];x-x,899-892[BULt];24-24,886-886[UP3]	.(((((........(.(((((((((((((...&...))))))))))))).)--------))))).	CGGAGCAGCACGUGUGGGGUGCAGUGGACGCA&AAAGUCCACUGCACCUGA--------GUUUCU	0	0	NA	NA	NA	0	0	NA	NA	NA	1	32.4181	4	0.965845	Output/R24h/cleaveLand_result/t_plot/PC-3p-122748_59_XM_016117041.2_908_TPlot.pdf	0	0	32.4181	8.3342e-15	9.59436e-15	yes	NA	ko04120(Ubiquitin mediated proteolysis);ko01100(Metabolic pathways);ko00040(Pentose and glucuronate interconversions)
PC-3p-122748_59	XM_021131017.1	1561	1587	1576	-43.4	-29	0.668203	11.5	3-3,1585-1585;5-8,1583-1580;9-13,1577-1573;14-23,1571-1562	1-2,1587-1586[UP5];4-4,1584-1584[SIL];x-x,1579-1578[BULt];x-x,1572-1572[BULt];24-24,1561-1561[UP3]	.((((((((((.(((((..((((.(..&..).))))--)))))-)))))))))).	UGAAGCUCAGGAUGCAGCAUGGAGUCC&AAAGUCCA--CUGCA-CCUGAGUUUCU	1	39.6024	4	0.945296	Output/R0h/cleaveLand_result/t_plot/PC-3p-122748_59_XM_021131017.1_1576_TPlot.pdf	1	32.684	4	0.96997	Output/R8h/cleaveLand_result/t_plot/PC-3p-122748_59_XM_021131017.1_1576_TPlot.pdf	0	0	NA	NA	NA	39.6024	32.684	0	8.6245e-09	9.35023e-09	yes	GO:0044260(cellular macromolecule metabolic process);GO:0006468(protein phosphorylation);GO:0051716(cellular response to stimulus);GO:0006796(phosphate-containing compound metabolic process);GO:0006464(cellular protein modification process);GO:0016310(phosphorylation);GO:0007154(cell communication);GO:0035639(purine ribonucleoside triphosphate binding);GO:0016772(transferase activity, transferrin…	NA
PC-3p-122748_59	XM_021139634.1	1076	1109	1100	-43.4	-30.4	0.700461	19	2-10,1108-1100;11-15,1092-1088;16-24,1084-1076	1-1,1109-1109[UP5];x-x,1099-1093[BULt];x-x,1087-1085[BULt]	(((((((((...(((((.......(((((((((.&.)))))))))-------)))))---)))))))))	GGGAACUCAAAUGGUGCUGUAAAUAGUGGACUUG&AAAGUCCACU-------GCACC---UGAGUUUCU	0	0	NA	NA	NA	0	0	NA	NA	NA	1	32.4181	4	0.889781	Output/R24h/cleaveLand_result/t_plot/PC-3p-122748_59_XM_021139634.1_1100_TPlot.pdf	0	0	32.4181	8.3342e-15	9.59436e-15	yes	GO:1901564(organonitrogen compound metabolic process);GO:0044260(cellular macromolecule metabolic process);GO:0043170(macromolecule metabolic process);GO:0044238(primary metabolic process);GO:0003824(catalytic activity);GO:0071840(cellular component organization or biogenesis);GO:0019538(protein metabolic process);GO:0006355(regulation of transcription, DNA-templated);GO:0043231(intracellular mem…	NA
PC-3p-122855_59	BGI_novel_T010542	1077	1100	1091	-35.8	-25.1	0.701117	14	7-13,1094-1088;16-23,1085-1078	1-6,1100-1095[UP5];14-15,1087-1086[SIL];24-24,1077-1077[UP3]	.((((((((..(((((((......&......)))))))..)))))))).	CACAAAUCGGAUGGUCCGAAUUGA&AUAAAACGGACCAUACGAUUUGUA	1	39.6024	4	0.281826	Output/R0h/cleaveLand_result/t_plot/PC-3p-122855_59_BGI_novel_T010542_1091_TPlot.pdf	0	0	NA	NA	NA	0	0	NA	NA	NA	39.6024	0	0	6.3194e-18	1.52182e-17	yes	GO:0016020(membrane);GO:0019867(outer membrane)	NA
PC-3p-122855_59	XM_016079371.2	1780	1803	1794	-35.8	-25.6	0.715084	16.5	8-23,1796-1781	1-7,1803-1797[UP5];24-24,1780-1780[UP3]	.((((((((((((((((.......&.......)))))))))))))))).	AGCAGGUUGUGUGGUCCAACAGGU&AUAAAACGGACCAUACGAUUUGUA	1	39.6024	4	0.104477	Output/R0h/cleaveLand_result/t_plot/PC-3p-122855_59_XM_016079371.2_1794_TPlot.pdf	0	0	NA	NA	NA	0	0	NA	NA	NA	39.6024	0	0	6.3194e-18	1.52182e-17	yes	GO:0004683(calmodulin-dependent protein kinase activity);GO:0005516(calmodulin binding);GO:0046777(protein autophosphorylation);GO:0071229(cellular response to acid chemical);GO:0044238(primary metabolic process);GO:0043231(intracellular membrane-bounded organelle);GO:0004674(protein serine/threonine kinase activity);GO:0001101(response to acid chemical);GO:0065007(biological regulation);GO:00442…	ko04626(Plant-pathogen interaction)
PC-3p-122855_59	XM_016103523.2	682	705	696	-35.8	-25.1	0.701117	5.5	1-21,705-685	22-24,684-682[UP3]	...(((((((((((((((((((((&)))))))))))))))))))))...	AGAAAAUUGUAUGGUUUGUUUUAU&AUAAAACGGACCAUACGAUUUGUA	1	39.6024	4	0.332762	Output/R0h/cleaveLand_result/t_plot/PC-3p-122855_59_XM_016103523.2_696_TPlot.pdf	2	65.368	3	0.0470383	Output/R8h/cleaveLand_result/t_plot/PC-3p-122855_59_XM_016103523.2_696_TPlot.pdf	0	0	NA	NA	NA	39.6024	65.368	0	3.4877e-14	3.94452e-14	yes	NA	NA
PC-3p-122855_59	XM_021137877.1	1277	1301	1292	-35.8	-24	0.670391	12	5-12,1297-1290;13-21,1288-1280	1-4,1301-1298[UP5];x-x,1289-1289[BULt];22-24,1279-1277[UP3]	...(((((((((.((((((((....&....))))))))-)))))))))...	UGAAAAUCGUAUCGGUCCGUUCAAG&AUAAAACGGACC-AUACGAUUUGUA	0	0	NA	NA	NA	0	0	NA	NA	NA	1	32.4181	4	0.531429	Output/R24h/cleaveLand_result/t_plot/PC-3p-122855_59_XM_021137877.1_1292_TPlot.pdf	0	0	32.4181	8.3342e-15	9.59436e-15	yes	GO:0044281(small molecule metabolic process);GO:0016491(oxidoreductase activity);GO:0044464(cell part);GO:0044424(intracellular part);GO:0036094(small molecule binding);GO:0065007(biological regulation);GO:0048037(cofactor binding);GO:1901575(organic substance catabolic process);GO:0030258(lipid modification);GO:0052890(oxidoreductase activity, acting on the CH-CH group of donors, with a flavin a…	ko01212(Fatty acid metabolism);ko00592(alpha-Linolenic acid metabolism);ko01100(Metabolic pathways);ko01110(Biosynthesis of secondary metabolites);ko01040(Biosynthesis of unsaturated fatty acids);ko04146(Peroxisome);ko00071(Fatty acid degradation)
PC-3p-122855_59	XM_021139917.1	666	689	680	-35.8	-25.1	0.701117	5.5	1-21,689-669	22-24,668-666[UP3]	...(((((((((((((((((((((&)))))))))))))))))))))...	AGAAAAUUGUAUGGUUUGUUUUAU&AUAAAACGGACCAUACGAUUUGUA	0	0	NA	NA	NA	1	32.684	4	0.343973	Output/R8h/cleaveLand_result/t_plot/PC-3p-122855_59_XM_021139917.1_680_TPlot.pdf	0	0	NA	NA	NA	0	32.684	0	6.3879e-15	9.59436e-15	yes	NA	NA
PC-3p-12333_982	BGI_novel_T000429	1532	1555	1546	-42.7	-29.6	0.693208	12	4-23,1552-1533	1-3,1555-1553[UP5];24-24,1532-1532[UP3]	.((((((((((((((((((((...&...)))))))))))))))))))).	GCAGCAGCUGGUGGAGUUCAGGCU&UUGUUGGGCUUUAUCAGUUGCUGG	0	0	NA	NA	NA	0	0	NA	NA	NA	2	64.8361	0	0.0401918	Output/R24h/cleaveLand_result/t_plot/PC-3p-12333_982_BGI_novel_T000429_1546_TPlot.pdf	0	0	64.8361	6.941e-29	3.45403e-28	yes	NA	ko00480(Glutathione metabolism);ko01100(Metabolic pathways);ko00270(Cysteine and methionine metabolism);ko00190(Oxidative phosphorylation)
PC-3p-12333_982	BGI_novel_T000945	1915	1938	1929	-42.7	-33.3	0.779859	11	4-24,1935-1915	1-3,1938-1936[UP5]	(((((((((((((((((((((...&...)))))))))))))))))))))	CUGGCAGCUGGUGGGGCCCAGAAU&UUGUUGGGCUUUAUCAGUUGCUGG	0	0	NA	NA	NA	0	0	NA	NA	NA	1	32.4181	4	0.0665943	Output/R24h/cleaveLand_result/t_plot/PC-3p-12333_982_BGI_novel_T000945_1929_TPlot.pdf	0	0	32.4181	8.3342e-15	9.59436e-15	yes	NA	NA
PC-3p-12333_982	BGI_novel_T001667	2201	2224	2215	-42.7	-28.3	0.662763	8	2-15,2223-2210;16-20,2208-2204;22-24,2203-2201	1-1,2224-2224[UP5];x-x,2209-2209[BULt];21-21,x-x[BULq]	(((-(((((.((((((((((((((.&.))))))))))))))-))))).)))	CCA-CAGCUCGGUGGGGUCCAACAU&UUGUUGGGCUUUAUC-AGUUGCUGG	0	0	NA	NA	NA	0	0	NA	NA	NA	1	32.4181	4	0.999968	Output/R24h/cleaveLand_result/t_plot/PC-3p-12333_982_BGI_novel_T001667_2215_TPlot.pdf	0	0	32.4181	8.3342e-15	9.59436e-15	yes	GO:0016491(oxidoreductase activity);GO:0003824(catalytic activity);GO:0019748(secondary metabolic process);GO:0051213(dioxygenase activity);GO:0008152(metabolic process)	ko04144(Endocytosis);ko01100(Metabolic pathways);ko01230(Biosynthesis of amino acids);ko01110(Biosynthesis of secondary metabolites);ko00710(Carbon fixation in photosynthetic organisms);ko00520(Amino sugar and nucleotide sugar metabolism);ko00010(Glycolysis / Gluconeogenesis);ko01200(Carbon metabolism);ko00130(Ubiquinone and other terpenoid-quinone biosynthesis)
PC-3p-12333_982	BGI_novel_T001902	1420	1444	1435	-42.7	-31.9	0.747073	7	1-9,1444-1436;12-16,1433-1429;18-24,1426-1420	10-11,1435-1434[SIL];17-17,1428-1427[AILt]	(((((((..(((((..(((((((((&)))))))))..)))))-.)))))))	CCAGCAGGAUGGUAUUGCCCAACAA&UUGUUGGGCUUUAUCA-GUUGCUGG	0	0	NA	NA	NA	1	32.684	4	0.462721	Output/R8h/cleaveLand_result/t_plot/PC-3p-12333_982_BGI_novel_T001902_1435_TPlot.pdf	0	0	NA	NA	NA	0	32.684	0	6.3879e-15	9.59436e-15	yes	GO:0016887(ATPase activity);GO:0030554(adenyl nucleotide binding);GO:0005886(plasma membrane);GO:0016020(membrane);GO:0071944(cell periphery);GO:0016462(pyrophosphatase activity);GO:0044425(membrane part);GO:0016817(hydrolase activity, acting on acid anhydrides);GO:0043492(ATPase activity, coupled to movement of substances);GO:0005215(transporter activity);GO:0097159(organic cyclic compound bindi…	ko02010(ABC transporters)
PC-3p-12333_982	BGI_novel_T002722	1645	1671	1662	-42.7	-28.2	0.660422	11.5	2-5,1670-1667;7-11,1665-1661;13-18,1660-1655;19-24,1650-1645	1-1,1671-1671[UP5];6-6,1666-1666[SIL];12-12,x-x[BULq];x-x,1654-1651[BULt]	((((((....((((((-(((((.((((.&.)))).))))).))))))----))))))	CCAGCACUUGGCUGAU-AAGCUGGACAU&UUGUUGGGCUUUAUCAGU----UGCUGG	0	0	NA	NA	NA	1	32.684	4	0.999982	Output/R8h/cleaveLand_result/t_plot/PC-3p-12333_982_BGI_novel_T002722_1662_TPlot.pdf	0	0	NA	NA	NA	0	32.684	0	6.3879e-15	9.59436e-15	yes	GO:0016887(ATPase activity);GO:0017111(nucleoside-triphosphatase activity);GO:0097159(organic cyclic compound binding);GO:0097367(carbohydrate derivative binding);GO:1901265(nucleoside phosphate binding);GO:0032555(purine ribonucleotide binding);GO:0043168(anion binding);GO:0032553(ribonucleotide binding);GO:0032559(adenyl ribonucleotide binding);GO:0035639(purine ribonucleoside triphosphate bind…	NA
PC-3p-12333_982	BGI_novel_T002788	892	920	906	-42.7	-28.2	0.660422	15.5	2-7,919-914;8-19,908-897;21-24,895-892	1-1,920-920[UP5];x-x,913-909[BULt];20-20,896-896[SIL]	((((.((((((((((((.....((((((.&.))))))-----)))))))))))).))))	CCAGGAAUUGAUGAGGUUUGCUCCAACAC&UUGUUGG-----GCUUUAUCAGUUGCUGG	1	39.6024	4	0.999859	Output/R0h/cleaveLand_result/t_plot/PC-3p-12333_982_BGI_novel_T002788_906_TPlot.pdf	0	0	NA	NA	NA	0	0	NA	NA	NA	39.6024	0	0	6.3194e-18	1.52182e-17	yes	GO:0072655(establishment of protein localization to mitochondrion);GO:0031224(intrinsic component of membrane);GO:0070727(cellular macromolecule localization);GO:0032555(purine ribonucleotide binding);GO:0006886(intracellular protein transport);GO:0043226(organelle);GO:1901265(nucleoside phosphate binding);GO:0044429(mitochondrial part);GO:0015031(protein transport);GO:0044237(cellular metabolic …	NA
PC-3p-12333_982	BGI_novel_T009373	1027	1052	1043	-42.7	-27.8	0.651054	7	1-5,1052-1048;7-15,1046-1038;17-24,1034-1027	6-6,1047-1047[SIL];16-16,1037-1035[AILt]	((((((((...(((((((((.(((((&))))).)))))))))--.))))))))	CUAGCAACAAAGAUAAAGCUGAACAG&UUGUUGGGCUUUAUC--AGUUGCUGG	0	0	NA	NA	NA	0	0	NA	NA	NA	3	97.2542	2	0.985234	Output/R24h/cleaveLand_result/t_plot/PC-3p-12333_982_BGI_novel_T009373_1043_TPlot.pdf	0	0	97.2542	5.7766e-43	9.1307e-42	yes	NA	ko00071(Fatty acid degradation);ko01100(Metabolic pathways);ko04146(Peroxisome);ko01212(Fatty acid metabolism);ko00061(Fatty acid biosynthesis)
PC-3p-12333_982	BGI_novel_T010676	1292	1315	1306	-42.7	-28.3	0.662763	9.5	1-5,1315-1311;7-12,1309-1304;14-22,1302-1294;24-24,1292-1292	6-6,1310-1310[SIL];13-13,1303-1303[SIL];23-23,1293-1293[SIL]	(.(((((((((.((((((.(((((&))))).)))))).))))))))).)	CGGGCGGCUGAGGGAGUCGGACAA&UUGUUGGGCUUUAUCAGUUGCUGG	1	39.6024	4	0.999721	Output/R0h/cleaveLand_result/t_plot/PC-3p-12333_982_BGI_novel_T010676_1306_TPlot.pdf	0	0	NA	NA	NA	0	0	NA	NA	NA	39.6024	0	0	6.3194e-18	1.52182e-17	yes	GO:0016740(transferase activity);GO:0016758(transferase activity, transferring hexosyl groups);GO:0003824(catalytic activity);GO:0008194(UDP-glycosyltransferase activity);GO:0016757(transferase activity, transferring glycosyl groups);GO:0008375(acetylglucosaminyltransferase activity);GO:0016020(membrane)	NA
PC-3p-12333_982	BGI_novel_T011034	632	655	646	-42.7	-28.5	0.667447	13	3-5,653-651;7-23,649-633	1-2,655-654[UP5];6-6,650-650[SIL];24-24,632-632[UP3]	.(((((((((((((((((.(((..&..))).))))))))))))))))).	GCAGCAGCUGGUGGAGUUGGAUCC&UUGUUGGGCUUUAUCAGUUGCUGG	1	39.6024	4	0.999373	Output/R0h/cleaveLand_result/t_plot/PC-3p-12333_982_BGI_novel_T011034_646_TPlot.pdf	0	0	NA	NA	NA	0	0	NA	NA	NA	39.6024	0	0	6.3194e-18	1.52182e-17	yes	GO:0044464(cell part);GO:0005623(cell);GO:0003824(catalytic activity);GO:0006950(response to stress);GO:0016491(oxidoreductase activity);GO:0043167(ion binding);GO:0055114(oxidation-reduction process);GO:0006979(response to oxidative stress);GO:0046914(transition metal ion binding);GO:0005737(cytoplasm);GO:0033554(cellular response to stress);GO:0051716(cellular response to stimulus);GO:0070887(c…	NA
PC-3p-12333_982	BGI_novel_T011294	556	579	570	-42.7	-28.8	0.674473	11	1-4,579-576;6-6,574-574;8-9,572-571;12-24,568-556	5-5,575-575[SIL];7-7,573-573[SIL];10-11,570-569[SIL]	(((((((((((((..((.(.((((&)))).).))..)))))))))))))	CCGGCGACUGGUACUGCGCCGCAG&UUGUUGGGCUUUAUCAGUUGCUGG	0	0	NA	NA	NA	1	32.684	4	0.999382	Output/R8h/cleaveLand_result/t_plot/PC-3p-12333_982_BGI_novel_T011294_570_TPlot.pdf	0	0	NA	NA	NA	0	32.684	0	6.3879e-15	9.59436e-15	yes	GO:0046914(transition metal ion binding);GO:0008270(zinc ion binding);GO:0043169(cation binding);GO:0043167(ion binding);GO:0005488(binding);GO:0046872(metal ion binding)	ko03022(Basal transcription factors)
PC-3p-12333_982	BGI_novel_T011295	1022	1045	1036	-42.7	-28.8	0.674473	11	1-4,1045-1042;6-6,1040-1040;8-9,1038-1037;12-24,1034-1022	5-5,1041-1041[SIL];7-7,1039-1039[SIL];10-11,1036-1035[SIL]	(((((((((((((..((.(.((((&)))).).))..)))))))))))))	CCGGCGACUGGUACUGCGCCGCAG&UUGUUGGGCUUUAUCAGUUGCUGG	0	0	NA	NA	NA	1	32.684	4	0.999505	Output/R8h/cleaveLand_result/t_plot/PC-3p-12333_982_BGI_novel_T011295_1036_TPlot.pdf	0	0	NA	NA	NA	0	32.684	0	6.3879e-15	9.59436e-15	yes	GO:0046914(transition metal ion binding);GO:0008270(zinc ion binding);GO:0043169(cation binding);GO:0043167(ion binding);GO:0005488(binding);GO:0046872(metal ion binding)	ko03022(Basal transcription factors)
PC-3p-12333_982	BGI_novel_T012638	886	913	901	-42.7	-28.5	0.667447	12.5	2-6,912-908;7-15,904-896;16-23,894-887	1-1,913-913[UP5];x-x,907-905[BULt];x-x,895-895[BULt];24-24,886-886[UP3]	.((((((((.(((((((((...(((((.&.)))))---)))))))))-)))))))).	GCAGCAGCUCGAUAAGGCUGCUCAGCAG&UUGUUG---GGCUUUAUC-AGUUGCUGG	0	0	NA	NA	NA	0	0	NA	NA	NA	1	32.4181	4	0.999885	Output/R24h/cleaveLand_result/t_plot/PC-3p-12333_982_BGI_novel_T012638_901_TPlot.pdf	0	0	32.4181	8.3342e-15	9.59436e-15	yes	NA	ko04075(Plant hormone signal transduction)
PC-3p-12333_982	XM_016077957.2	2854	2878	2868	-42.7	-28.76	0.673536	8	1-7,2878-2872;8-12,2870-2866;17-24,2861-2854	x-x,2871-2871[BULt];13-16,2865-2862[SIL]	((((((((....(((((.(((((((&)))))))-)))))....))))))))	CCAGCAACACCAGAAGCACCAGCAA&UUGUUGG-GCUUUAUCAGUUGCUGG	0	0	NA	NA	NA	2	65.368	3	0.531279	Output/R8h/cleaveLand_result/t_plot/PC-3p-12333_982_XM_016077957.2_2868_TPlot.pdf	0	0	NA	NA	NA	0	65.368	0	4.0777e-29	2.60335e-28	yes	GO:0032555(purine ribonucleotide binding);GO:1901265(nucleoside phosphate binding);GO:0043168(anion binding);GO:0005524(ATP binding);GO:0008152(metabolic process);GO:0030554(adenyl nucleotide binding);GO:0035639(purine ribonucleoside triphosphate binding);GO:0016628(oxidoreductase activity, acting on the CH-CH group of donors, NAD or NADP as acceptor);GO:0055114(oxidation-reduction process);GO:00…	NA
PC-3p-12333_982	XM_016080996.2	1475	1499	1490	-42.7	-28.2	0.660422	11	2-3,1498-1497;5-11,1495-1489;13-16,1486-1483;18-24,1481-1475	1-1,1499-1499[UP5];4-4,1496-1496[SIL];12-12,1488-1487[AILt];17-17,1482-1482[SIL]	(((((((.((((..(((((((.((.&.)).)))))))-.)))).)))))))	CCAGCGGGUGAUCUAGGCCCAUUAG&UUGUUGGGCUU-UAUCAGUUGCUGG	0	0	NA	NA	NA	1	32.684	4	0.999967	Output/R8h/cleaveLand_result/t_plot/PC-3p-12333_982_XM_016080996.2_1490_TPlot.pdf	0	0	NA	NA	NA	0	32.684	0	6.3879e-15	9.59436e-15	yes	GO:0016616(oxidoreductase activity, acting on the CH-OH group of donors, NAD or NADP as acceptor);GO:0043167(ion binding);GO:0019752(carboxylic acid metabolic process);GO:0005488(binding);GO:0044281(small molecule metabolic process);GO:0009082(branched-chain amino acid biosynthetic process);GO:0009081(branched-chain amino acid metabolic process);GO:0044249(cellular biosynthetic process);GO:000657…	ko01110(Biosynthesis of secondary metabolites);ko00770(Pantothenate and CoA biosynthesis);ko01210(2-Oxocarboxylic acid metabolism);ko00290(Valine, leucine and isoleucine biosynthesis);ko01100(Metabolic pathways);ko01230(Biosynthesis of amino acids)
PC-3p-12333_982	XM_016081364.2	1688	1711	1702	-42.7	-28.4	0.665105	9	2-4,1710-1708;6-16,1706-1696;18-22,1694-1690	1-1,1711-1711[UP5];5-5,1707-1707[SIL];17-17,1695-1695[SIL];23-24,1689-1688[UP3]	..(((((.(((((((((((.(((.&.))).))))))))))).)))))..	UAAGCAAGUGAUGAAGCCUCGCAU&UUGUUGGGCUUUAUCAGUUGCUGG	0	0	NA	NA	NA	0	0	NA	NA	NA	1	32.4181	4	0.999934	Output/R24h/cleaveLand_result/t_plot/PC-3p-12333_982_XM_016081364.2_1702_TPlot.pdf	0	0	32.4181	8.3342e-15	9.59436e-15	yes	GO:0044464(cell part);GO:0050896(response to stimulus);GO:0055044(symplast);GO:0030915(Smc5-Smc6 complex);GO:0005911(cell-cell junction);GO:0005694(chromosome);GO:0016043(cellular component organization);GO:0006725(cellular aromatic compound metabolic process);GO:0006996(organelle organization);GO:0006139(nucleobase-containing compound metabolic process);GO:0009987(cellular process);GO:0009506(pl…	NA
PC-3p-12333_982	XM_016081730.2	524	547	538	-42.7	-28.5	0.667447	13	3-5,545-543;7-23,541-525	1-2,547-546[UP5];6-6,542-542[SIL];24-24,524-524[UP3]	.(((((((((((((((((.(((..&..))).))))))))))))))))).	GCAGCAGCUGGUGGAGUUGGAUCC&UUGUUGGGCUUUAUCAGUUGCUGG	1	39.6024	4	0.999189	Output/R0h/cleaveLand_result/t_plot/PC-3p-12333_982_XM_016081730.2_538_TPlot.pdf	0	0	NA	NA	NA	0	0	NA	NA	NA	39.6024	0	0	6.3194e-18	1.52182e-17	yes	GO:0005737(cytoplasm);GO:0005829(cytosol);GO:0005623(cell);GO:0043167(ion binding);GO:0008152(metabolic process);GO:0008270(zinc ion binding);GO:0005488(binding);GO:0005622(intracellular);GO:0016491(oxidoreductase activity);GO:0003824(catalytic activity);GO:0044464(cell part);GO:0046914(transition metal ion binding);GO:0044444(cytoplasmic part);GO:0055114(oxidation-reduction process);GO:0044424(i…	NA
PC-3p-12333_982	XM_016082088.2	1530	1556	1547	-42.7	-28.7	0.672131	17	3-10,1554-1547;14-23,1540-1531	1-2,1556-1555[UP5];11-13,1546-1541[AILt];24-24,1530-1530[UP3]	.((((((((((......((((((((..&..))))))))---...)))))))))).	GUAGCAGCUGAGAACAUAGCCCGACUC&UUGUUGGGCU---UUAUCAGUUGCUGG	0	0	NA	NA	NA	0	0	NA	NA	NA	1	32.4181	4	0.999787	Output/R24h/cleaveLand_result/t_plot/PC-3p-12333_982_XM_016082088.2_1547_TPlot.pdf	0	0	32.4181	8.3342e-15	9.59436e-15	yes	GO:0006082(organic acid metabolic process);GO:0071704(organic substance metabolic process);GO:0044237(cellular metabolic process);GO:0016054(organic acid catabolic process);GO:0006575(cellular modified amino acid metabolic process);GO:0044248(cellular catabolic process);GO:0044273(sulfur compound catabolic process);GO:0046395(carboxylic acid catabolic process);GO:0009987(cellular process);GO:0009…	ko00900(Terpenoid backbone biosynthesis)
PC-3p-12333_982	XM_016082582.2	568	591	582	-42.7	-28.8	0.674473	11	1-4,591-588;6-6,586-586;8-9,584-583;12-24,580-568	5-5,587-587[SIL];7-7,585-585[SIL];10-11,582-581[SIL]	(((((((((((((..((.(.((((&)))).).))..)))))))))))))	CCGGCGACUGGUACUGCGCCGCAG&UUGUUGGGCUUUAUCAGUUGCUGG	1	39.6024	4	0.997966	Output/R0h/cleaveLand_result/t_plot/PC-3p-12333_982_XM_016082582.2_582_TPlot.pdf	1	32.684	4	0.999434	Output/R8h/cleaveLand_result/t_plot/PC-3p-12333_982_XM_016082582.2_582_TPlot.pdf	0	0	NA	NA	NA	39.6024	32.684	0	8.6245e-09	9.35023e-09	yes	GO:0046914(transition metal ion binding);GO:0008270(zinc ion binding);GO:0043169(cation binding);GO:0043167(ion binding);GO:0005488(binding);GO:0046872(metal ion binding)	ko03022(Basal transcription factors)
PC-3p-12333_982	XM_016083797.2	438	464	455	-42.7	-30.3	0.709602	11.5	1-11,464-454;12-19,450-443;21-24,441-438	x-x,453-451[BULt];20-20,442-442[SIL]	((((.((((((((...(((((((((((&)))))))))))---)))))))).))))	CCAGGAGCUGGUGGACAGGUCCAACAG&UUGUUGGGCUU---UAUCAGUUGCUGG	0	0	NA	NA	NA	2	65.368	3	0.193154	Output/R8h/cleaveLand_result/t_plot/PC-3p-12333_982_XM_016083797.2_455_TPlot.pdf	1	32.4181	4	0.894731	Output/R24h/cleaveLand_result/t_plot/PC-3p-12333_982_XM_016083797.2_455_TPlot.pdf	0	65.368	32.4181	5.8362e-15	9.59436e-15	yes	GO:0009719(response to endogenous stimulus);GO:0042221(response to chemical);GO:0009725(response to hormone);GO:0050896(response to stimulus);GO:0010033(response to organic substance);GO:0009733(response to auxin)	ko04075(Plant hormone signal transduction)
PC-3p-12333_982	XM_016084109.2	591	618	609	-42.7	-28.6	0.669789	11	3-17,616-602;18-24,597-591	1-2,618-617[UP5];x-x,601-598[BULt]	(((((((....(((((((((((((((..&..)))))))))))))))----)))))))	CCAGCAAUGCCCUGAUAAGGUUCAAUGG&UUGUUGGGCUUUAUCAG----UUGCUGG	0	0	NA	NA	NA	0	0	NA	NA	NA	3	97.2542	2	0.94234	Output/R24h/cleaveLand_result/t_plot/PC-3p-12333_982_XM_016084109.2_609_TPlot.pdf	0	0	97.2542	5.7766e-43	9.1307e-42	yes	GO:0003824(catalytic activity);GO:0016757(transferase activity, transferring glycosyl groups);GO:0016740(transferase activity)	ko00052(Galactose metabolism)
PC-3p-12333_982	XM_016085532.2	1966	1993	1981	-42.7	-29.1	0.681499	10	1-6,1993-1988;7-13,1984-1978;14-24,1976-1966	x-x,1987-1985[BULt];x-x,1977-1977[BULt]	(((((((((((.(((((((...((((((&))))))---)))))))-)))))))))))	UCAGCAACUGGUUGAAGCUGGUCAACAA&UUGUUG---GGCUUUA-UCAGUUGCUGG	1	39.6024	4	0.993755	Output/R0h/cleaveLand_result/t_plot/PC-3p-12333_982_XM_016085532.2_1981_TPlot.pdf	0	0	NA	NA	NA	0	0	NA	NA	NA	39.6024	0	0	6.3194e-18	1.52182e-17	yes	GO:0006810(transport);GO:0051234(establishment of localization);GO:0005623(cell);GO:0099568(cytoplasmic region);GO:0044464(cell part);GO:0043234(protein complex);GO:0032940(secretion by cell);GO:0044448(cell cortex part);GO:0099023(tethering complex);GO:0032991(macromolecular complex);GO:0009987(cellular process);GO:0044444(cytoplasmic part);GO:0016192(vesicle-mediated transport);GO:0005622(intra…	NA
PC-3p-12333_982	XM_016086990.2	1618	1642	1633	-42.7	-28.8	0.674473	9	3-16,1640-1627;18-24,1624-1618	1-2,1642-1641[UP5];17-17,1626-1625[AILt]	(((((((..((((((((((((((..&..))))))))))))))-.)))))))	UCAGCAGGAUGAUAAGGCUCAGCCU&UUGUUGGGCUUUAUCA-GUUGCUGG	0	0	NA	NA	NA	1	32.684	4	0.999526	Output/R8h/cleaveLand_result/t_plot/PC-3p-12333_982_XM_016086990.2_1633_TPlot.pdf	0	0	NA	NA	NA	0	32.684	0	6.3879e-15	9.59436e-15	yes	GO:0032549(ribonucleoside binding);GO:1901265(nucleoside phosphate binding);GO:0017111(nucleoside-triphosphatase activity);GO:0036094(small molecule binding);GO:0044249(cellular biosynthetic process);GO:0044238(primary metabolic process);GO:1901564(organonitrogen compound metabolic process);GO:0017076(purine nucleotide binding);GO:0003924(GTPase activity);GO:1901363(heterocyclic compound binding)…	ko03013(RNA transport)
PC-3p-12333_982	XM_016089538.2	1030	1058	1044	-42.7	-28.1	0.65808	14.5	1-2,1058-1057;4-8,1055-1051;9-23,1045-1031	3-3,1056-1056[SIL];x-x,1050-1046[BULt];24-24,1030-1030[UP3]	.(((((((((((((((.....(((((.((&)).)))))-----))))))))))))))).	GCAGCAAUUGAUGAAGGUUUACCCAAGAA&UUGUUGGG-----CUUUAUCAGUUGCUGG	0	0	NA	NA	NA	2	65.368	2	0.977846	Output/R8h/cleaveLand_result/t_plot/PC-3p-12333_982_XM_016089538.2_1044_TPlot.pdf	0	0	NA	NA	NA	0	65.368	0	4.0777e-29	2.60335e-28	yes	GO:0016705(oxidoreductase activity, acting on paired donors, with incorporation or reduction of molecular oxygen);GO:0055114(oxidation-reduction process);GO:0043167(ion binding);GO:1901363(heterocyclic compound binding);GO:0043169(cation binding);GO:0044425(membrane part);GO:0046872(metal ion binding);GO:0016020(membrane);GO:0046906(tetrapyrrole binding);GO:0016491(oxidoreductase activity);GO:009…	NA
PC-3p-12333_982	XM_016089564.2	368	391	382	-42.7	-29.2	0.683841	6.5	2-12,390-380;15-20,377-372;23-24,369-368	1-1,391-391[UP5];13-14,379-378[SIL];21-22,371-370[SIL]	((..((((((..(((((((((((.&.)))))))))))..))))))..))	CCCUCAGCUGUGAAAGCCCAGCAU&UUGUUGGGCUUUAUCAGUUGCUGG	0	0	NA	NA	NA	1	32.684	4	0.997384	Output/R8h/cleaveLand_result/t_plot/PC-3p-12333_982_XM_016089564.2_382_TPlot.pdf	0	0	NA	NA	NA	0	32.684	0	6.3879e-15	9.59436e-15	yes	NA	NA
PC-3p-12333_982	XM_016089734.2	285	309	300	-42.7	-28.1	0.65808	8.5	3-16,307-294;18-21,292-289;22-24,287-285	1-2,309-308[UP5];17-17,293-293[SIL];x-x,288-288[BULt]	(((.((((.((((((((((((((..&..)))))))))))))).))))-)))	CUAUGUAGGUGAUGAAGCCCAAUCC&UUGUUGGGCUUUAUCAGUUGC-UGG	2	79.2048	3	0.504564	Output/R0h/cleaveLand_result/t_plot/PC-3p-12333_982_XM_016089734.2_300_TPlot.pdf	0	0	NA	NA	NA	0	0	NA	NA	NA	79.2048	0	0	3.9892e-35	3.86508e-34	yes	GO:0005524(ATP binding);GO:0035639(purine ribonucleoside triphosphate binding);GO:0017076(purine nucleotide binding);GO:0032553(ribonucleotide binding);GO:0032555(purine ribonucleotide binding);GO:1901265(nucleoside phosphate binding);GO:0097367(carbohydrate derivative binding);GO:0097159(organic cyclic compound binding);GO:0005488(binding);GO:1901363(heterocyclic compound binding);GO:0043167(ion…	NA
PC-3p-12333_982	XM_016089735.2	333	357	348	-42.7	-28.1	0.65808	8.5	3-16,355-342;18-21,340-337;22-24,335-333	1-2,357-356[UP5];17-17,341-341[SIL];x-x,336-336[BULt]	(((.((((.((((((((((((((..&..)))))))))))))).))))-)))	CUAUGUAGGUGAUGAAGCCCAAUCC&UUGUUGGGCUUUAUCAGUUGC-UGG	2	79.2048	2	0.939137	Output/R0h/cleaveLand_result/t_plot/PC-3p-12333_982_XM_016089735.2_348_TPlot.pdf	1	32.684	4	0.999986	Output/R8h/cleaveLand_result/t_plot/PC-3p-12333_982_XM_016089735.2_348_TPlot.pdf	0	0	NA	NA	NA	79.2048	32.684	0	3.556e-19	1.45865e-18	yes	GO:0017076(purine nucleotide binding);GO:0000166(nucleotide binding);GO:1901363(heterocyclic compound binding);GO:0032553(ribonucleotide binding);GO:0043167(ion binding);GO:0030554(adenyl nucleotide binding);GO:0043168(anion binding);GO:0005488(binding);GO:1901265(nucleoside phosphate binding);GO:0097367(carbohydrate derivative binding);GO:0032559(adenyl ribonucleotide binding);GO:0036094(small m…	NA
PC-3p-12333_982	XM_016089736.2	335	359	350	-42.7	-28.1	0.65808	8.5	3-16,357-344;18-21,342-339;22-24,337-335	1-2,359-358[UP5];17-17,343-343[SIL];x-x,338-338[BULt]	(((.((((.((((((((((((((..&..)))))))))))))).))))-)))	CUAUGUAGGUGAUGAAGCCCAAUCC&UUGUUGGGCUUUAUCAGUUGC-UGG	1	39.6024	4	0.9999	Output/R0h/cleaveLand_result/t_plot/PC-3p-12333_982_XM_016089736.2_350_TPlot.pdf	1	32.684	4	0.999985	Output/R8h/cleaveLand_result/t_plot/PC-3p-12333_982_XM_016089736.2_350_TPlot.pdf	0	0	NA	NA	NA	39.6024	32.684	0	8.6245e-09	9.35023e-09	yes	GO:0017076(purine nucleotide binding);GO:0000166(nucleotide binding);GO:1901363(heterocyclic compound binding);GO:0032553(ribonucleotide binding);GO:0043167(ion binding);GO:0030554(adenyl nucleotide binding);GO:0043168(anion binding);GO:0005488(binding);GO:1901265(nucleoside phosphate binding);GO:0097367(carbohydrate derivative binding);GO:0032559(adenyl ribonucleotide binding);GO:0036094(small m…	NA
PC-3p-12333_982	XM_016095046.2	919	942	933	-42.7	-30.4	0.711944	9	1-18,942-925;20-22,923-921	19-19,924-924[SIL];23-24,920-919[UP3]	..(((.((((((((((((((((((&)))))))))))))))))).)))..	GAAGCCGCUGGUGAAGUCCGGCGA&UUGUUGGGCUUUAUCAGUUGCUGG	0	0	NA	NA	NA	1	32.684	4	0.758279	Output/R8h/cleaveLand_result/t_plot/PC-3p-12333_982_XM_016095046.2_933_TPlot.pdf	0	0	NA	NA	NA	0	32.684	0	6.3879e-15	9.59436e-15	yes	GO:0008168(methyltransferase activity);GO:0003824(catalytic activity);GO:0016741(transferase activity, transferring one-carbon groups);GO:0008152(metabolic process);GO:0016740(transferase activity);GO:0032259(methylation);GO:0016021(integral component of membrane);GO:0044425(membrane part);GO:0031224(intrinsic component of membrane);GO:0016020(membrane)	NA
PC-3p-12333_982	XM_016096512.2	2143	2166	2157	-42.7	-28.5	0.667447	6.5	2-3,2165-2164;5-14,2162-2153;17-24,2150-2143	1-1,2166-2166[UP5];4-4,2163-2163[SIL];15-16,2152-2151[SIL]	((((((((..((((((((((.((.&.)).))))))))))..))))))))	CCGGCAACCAAUAAAGCCUAUCAC&UUGUUGGGCUUUAUCAGUUGCUGG	1	39.6024	4	0.999313	Output/R0h/cleaveLand_result/t_plot/PC-3p-12333_982_XM_016096512.2_2157_TPlot.pdf	1	32.684	4	0.999847	Output/R8h/cleaveLand_result/t_plot/PC-3p-12333_982_XM_016096512.2_2157_TPlot.pdf	1	32.4181	4	0.999888	Output/R24h/cleaveLand_result/t_plot/PC-3p-12333_982_XM_016096512.2_2157_TPlot.pdf	39.6024	32.684	32.4181	0.62164	0.621776	yes	GO:0090304(nucleic acid metabolic process);GO:0044428(nuclear part);GO:0034660(ncRNA metabolic process);GO:0043414(macromolecule methylation);GO:1990904(ribonucleoprotein complex);GO:0031974(membrane-enclosed lumen);GO:0001510(RNA methylation);GO:0043412(macromolecule modification);GO:0046483(heterocycle metabolic process);GO:0016070(RNA metabolic process);GO:0016741(transferase activity, transfe…	NA
PC-3p-12333_982	XM_016097021.2	344	370	361	-42.7	-30.2	0.70726	10.5	2-5,369-366;7-18,364-353;19-23,349-345	1-1,370-370[UP5];6-6,365-365[SIL];x-x,352-350[BULt];24-24,344-344[UP3]	.(((((...((((((((((((.((((.&.)))).))))))))))))---))))).	ACAGCAUCAGCUGAUGAAGCUGAGCAU&UUGUUGGGCUUUAUCAGU---UGCUGG	0	0	NA	NA	NA	0	0	NA	NA	NA	1	32.4181	4	0.951794	Output/R24h/cleaveLand_result/t_plot/PC-3p-12333_982_XM_016097021.2_361_TPlot.pdf	0	0	32.4181	8.3342e-15	9.59436e-15	yes	GO:0020037(heme binding);GO:0046906(tetrapyrrole binding);GO:0009055(electron transfer activity);GO:1901363(heterocyclic compound binding);GO:0005488(binding);GO:0097159(organic cyclic compound binding)	ko01100(Metabolic pathways);ko00190(Oxidative phosphorylation)
PC-3p-12333_982	XM_016101716.2	568	595	585	-42.7	-31.5	0.737705	7	1-7,595-589;8-17,587-578;18-20,575-573;21-24,571-568	x-x,588-588[BULt];x-x,577-576[BULt];x-x,572-572[BULt]	((((.(((..((((((((((.(((((((&)))))))-))))))))))--)))-))))	CCAGACAAUUCUGAUGAAGCACCAGCAA&UUGUUGG-GCUUUAUCAG--UUG-CUGG	0	0	NA	NA	NA	1	32.684	4	0.597342	Output/R8h/cleaveLand_result/t_plot/PC-3p-12333_982_XM_016101716.2_585_TPlot.pdf	0	0	NA	NA	NA	0	32.684	0	6.3879e-15	9.59436e-15	yes	GO:0043229(intracellular organelle);GO:2000112(regulation of cellular macromolecule biosynthetic process);GO:0003677(DNA binding);GO:0050789(regulation of biological process);GO:0010468(regulation of gene expression);GO:0044464(cell part);GO:0051171(regulation of nitrogen compound metabolic process);GO:0006355(regulation of transcription, DNA-templated);GO:0019219(regulation of nucleobase-contain…	NA
PC-3p-12333_982	XM_016102403.2	1638	1663	1655	-42.7	-29.7	0.69555	8.5	1-8,1663-1656;10-18,1655-1647;19-23,1643-1639	9-9,x-x[BULq];x-x,1646-1644[BULt];24-24,1638-1638[UP3]	.(((((...(((((((((-((((((((&)))))))).)))))))))---))))).	GCAGCAUAUGCUGAUGAA-CCCAGCAA&UUGUUGGGCUUUAUCAGU---UGCUGG	1	39.6024	4	0.9635	Output/R0h/cleaveLand_result/t_plot/PC-3p-12333_982_XM_016102403.2_1655_TPlot.pdf	0	0	NA	NA	NA	0	0	NA	NA	NA	39.6024	0	0	6.3194e-18	1.52182e-17	yes	GO:0030276(clathrin binding);GO:0030135(coated vesicle);GO:0005622(intracellular);GO:0070271(protein complex biogenesis);GO:0005737(cytoplasm);GO:0022607(cellular component assembly);GO:0006461(protein complex assembly);GO:0044464(cell part);GO:0005488(binding);GO:0043933(macromolecular complex subunit organization);GO:0044085(cellular component biogenesis);GO:0065003(macromolecular complex assem…	NA
PC-3p-12333_982	XM_016102607.2	810	833	824	-42.7	-28.8	0.674473	8	1-6,833-828;8-13,826-821;15-24,819-810	7-7,827-827[SIL];14-14,820-820[SIL]	((((((((((.((((((.((((((&)))))).)))))).))))))))))	CUGGCAGCUGUUGAGGCACAGCAG&UUGUUGGGCUUUAUCAGUUGCUGG	0	0	NA	NA	NA	1	32.684	4	0.999515	Output/R8h/cleaveLand_result/t_plot/PC-3p-12333_982_XM_016102607.2_824_TPlot.pdf	2	64.8361	2	0.925982	Output/R24h/cleaveLand_result/t_plot/PC-3p-12333_982_XM_016102607.2_824_TPlot.pdf	0	32.684	64.8361	9.0915e-15	1.03633e-14	yes	NA	ko04144(Endocytosis)
PC-3p-12333_982	XM_016104994.2	601	623	615	-42.7	-29.5	0.690867	7.5	2-5,622-619;8-23,617-602	1-1,623-623[UP5];6-7,618-618[AILq];24-24,601-601[UP3]	.((((((((((((((((.-((((.&.))))..)))))))))))))))).	ACAGCAACUGGUAAAGCA-AGCAC&UUGUUGGGCUUUAUCAGUUGCUGG	2	79.2048	2	0.75054	Output/R0h/cleaveLand_result/t_plot/PC-3p-12333_982_XM_016104994.2_615_TPlot.pdf	0	0	NA	NA	NA	0	0	NA	NA	NA	79.2048	0	0	3.9892e-35	3.86508e-34	yes	GO:0005488(binding);GO:1901363(heterocyclic compound binding);GO:0003676(nucleic acid binding);GO:0097159(organic cyclic compound binding)	ko03013(RNA transport);ko03008(Ribosome biogenesis in eukaryotes)
PC-3p-12333_982	XM_016104995.2	603	625	617	-42.7	-29.5	0.690867	7.5	2-5,624-621;8-23,619-604	1-1,625-625[UP5];6-7,620-620[AILq];24-24,603-603[UP3]	.((((((((((((((((.-((((.&.))))..)))))))))))))))).	ACAGCAACUGGUAAAGCA-AGCAC&UUGUUGGGCUUUAUCAGUUGCUGG	0	0	NA	NA	NA	1	32.684	4	0.996185	Output/R8h/cleaveLand_result/t_plot/PC-3p-12333_982_XM_016104995.2_617_TPlot.pdf	0	0	NA	NA	NA	0	32.684	0	6.3879e-15	9.59436e-15	yes	GO:0005488(binding);GO:1901363(heterocyclic compound binding);GO:0003676(nucleic acid binding);GO:0097159(organic cyclic compound binding)	ko03013(RNA transport);ko03008(Ribosome biogenesis in eukaryotes)
PC-3p-12333_982	XM_016107701.2	597	622	613	-42.7	-27.8	0.651054	7	1-5,622-618;7-15,616-608;17-24,604-597	6-6,617-617[SIL];16-16,607-605[AILt]	((((((((...(((((((((.(((((&))))).)))))))))--.))))))))	CUAGCAACAAAGAUAAAGCUGAACAG&UUGUUGGGCUUUAUC--AGUUGCUGG	2	79.2048	2	0.956142	Output/R0h/cleaveLand_result/t_plot/PC-3p-12333_982_XM_016107701.2_613_TPlot.pdf	0	0	NA	NA	NA	0	0	NA	NA	NA	79.2048	0	0	3.9892e-35	3.86508e-34	yes	NA	NA
PC-3p-12333_982	XM_016111496.2	723	747	738	-42.7	-27.8	0.651054	7	2-2,746-746;4-14,744-734;17-18,731-730;19-24,728-723	1-1,747-747[UP5];3-3,745-745[SIL];15-16,733-732[SIL];x-x,729-729[BULt]	((((((.((..(((((((((((.(.&.).)))))))))))..))-))))))	CCAGCAGACCCAUGAAGCCCAAGAU&UUGUUGGGCUUUAUCAGU-UGCUGG	1	39.6024	4	0.999969	Output/R0h/cleaveLand_result/t_plot/PC-3p-12333_982_XM_016111496.2_738_TPlot.pdf	0	0	NA	NA	NA	1	32.4181	4	0.999998	Output/R24h/cleaveLand_result/t_plot/PC-3p-12333_982_XM_016111496.2_738_TPlot.pdf	39.6024	0	32.4181	8.8481e-09	9.41666e-09	yes	GO:0016021(integral component of membrane);GO:0044425(membrane part);GO:0031224(intrinsic component of membrane);GO:0016020(membrane)	NA
PC-3p-12333_982	XM_016113065.2	1815	1837	1829	-42.7	-27.96	0.654801	12	2-9,1836-1829;17-24,1822-1815	1-1,1837-1837[UP5];10-16,1828-1823[AILq]	((((((((......-((((((((.&.)))))))).......))))))))	CCAGCAACAAUCUU-GCCCAGCAC&UUGUUGGGCUUUAUCAGUUGCUGG	0	0	NA	NA	NA	0	0	NA	NA	NA	2	64.8361	2	0.982159	Output/R24h/cleaveLand_result/t_plot/PC-3p-12333_982_XM_016113065.2_1829_TPlot.pdf	0	0	64.8361	6.941e-29	3.45403e-28	yes	NA	ko04136(Autophagy - other)
PC-3p-12333_982	XM_016113888.2	570	593	584	-42.7	-30.4	0.711944	5.5	1-6,593-588;8-18,586-576;21-24,573-570	7-7,587-587[SIL];19-20,575-574[SIL]	((((..(((((((((((.((((((&)))))).)))))))))))..))))	CCAGGCAUUGAUAAAGCGCAACGA&UUGUUGGGCUUUAUCAGUUGCUGG	0	0	NA	NA	NA	1	32.684	4	0.735846	Output/R8h/cleaveLand_result/t_plot/PC-3p-12333_982_XM_016113888.2_584_TPlot.pdf	0	0	NA	NA	NA	0	32.684	0	6.3879e-15	9.59436e-15	yes	NA	ko03022(Basal transcription factors);ko03420(Nucleotide excision repair)
PC-3p-12333_982	XM_016117396.2	1293	1314	1307	-42.7	-30	0.702576	11.5	2-8,1313-1307;12-24,1305-1293	1-1,1314-1314[UP5];9-11,1306-1306[AILq]	(((((((((((((.--(((((((.&.)))))))...)))))))))))))	CCGGCGGCUGAUGC--CCCGGCAG&UUGUUGGGCUUUAUCAGUUGCUGG	5	198.012	2	0.562868	Output/R0h/cleaveLand_result/t_plot/PC-3p-12333_982_XM_016117396.2_1307_TPlot.pdf	2	65.368	3	0.278421	Output/R8h/cleaveLand_result/t_plot/PC-3p-12333_982_XM_016117396.2_1307_TPlot.pdf	2	64.8361	3	0.261226	Output/R24h/cleaveLand_result/t_plot/PC-3p-12333_982_XM_016117396.2_1307_TPlot.pdf	198.012	65.368	64.8361	4.1961e-24	1.95408e-23	yes	NA	NA
PC-3p-12333_982	XM_021128694.1	1198	1222	1213	-42.7	-27.9	0.653396	9	2-10,1221-1213;13-17,1211-1207;19-24,1203-1198	1-1,1222-1222[UP5];11-12,1212-1212[AILq];18-18,1206-1204[AILt]	((((((...(((((.-(((((((((.&.)))))))))..)))))--.))))))	CCAGCACAUCUGAUC-AGCCCAAUAU&UUGUUGGGCUUUAUCAG--UUGCUGG	0	0	NA	NA	NA	1	32.684	4	0.999993	Output/R8h/cleaveLand_result/t_plot/PC-3p-12333_982_XM_021128694.1_1213_TPlot.pdf	0	0	NA	NA	NA	0	32.684	0	6.3879e-15	9.59436e-15	yes	NA	NA
PC-3p-12333_982	XM_021129277.1	3634	3656	3647	-42.7	-29.9	0.700234	7.5	1-11,3656-3646;13-24,3645-3634	12-12,x-x[BULq]	((((((((((((-(((((((((((&))))))))))).))))))))))))	CCGGCAACUGGU-AGGCCUAGUAG&UUGUUGGGCUUUAUCAGUUGCUGG	1	39.6024	4	0.942193	Output/R0h/cleaveLand_result/t_plot/PC-3p-12333_982_XM_021129277.1_3647_TPlot.pdf	0	0	NA	NA	NA	0	0	NA	NA	NA	39.6024	0	0	6.3194e-18	1.52182e-17	yes	GO:0005623(cell);GO:0060255(regulation of macromolecule metabolic process);GO:0019219(regulation of nucleobase-containing compound metabolic process);GO:0044260(cellular macromolecule metabolic process);GO:0050789(regulation of biological process);GO:0019538(protein metabolic process);GO:0005737(cytoplasm);GO:2000112(regulation of cellular macromolecule biosynthetic process);GO:0044444(cytoplasmi…	ko00480(Glutathione metabolism);ko04016(MAPK signaling pathway - plant);ko04075(Plant hormone signal transduction)
PC-3p-12333_982	XM_021129278.1	2461	2483	2474	-42.7	-29.9	0.700234	7.5	1-11,2483-2473;13-24,2472-2461	12-12,x-x[BULq]	((((((((((((-(((((((((((&))))))))))).))))))))))))	CCGGCAACUGGU-AGGCCUAGUAG&UUGUUGGGCUUUAUCAGUUGCUGG	0	0	NA	NA	NA	0	0	NA	NA	NA	1	32.4181	4	0.974663	Output/R24h/cleaveLand_result/t_plot/PC-3p-12333_982_XM_021129278.1_2474_TPlot.pdf	0	0	32.4181	8.3342e-15	9.59436e-15	yes	GO:0005623(cell);GO:0060255(regulation of macromolecule metabolic process);GO:0019219(regulation of nucleobase-containing compound metabolic process);GO:0044260(cellular macromolecule metabolic process);GO:0050789(regulation of biological process);GO:0019538(protein metabolic process);GO:0005737(cytoplasm);GO:2000112(regulation of cellular macromolecule biosynthetic process);GO:0044444(cytoplasmi…	ko00480(Glutathione metabolism);ko04016(MAPK signaling pathway - plant);ko04075(Plant hormone signal transduction)
PC-3p-12333_982	XM_021131518.1	1527	1551	1542	-42.7	-28.8	0.674473	9	3-16,1549-1536;18-24,1533-1527	1-2,1551-1550[UP5];17-17,1535-1534[AILt]	(((((((..((((((((((((((..&..))))))))))))))-.)))))))	UCAGCAGGAUGAUAAGGCUCAGCCU&UUGUUGGGCUUUAUCA-GUUGCUGG	2	79.2048	2	0.850343	Output/R0h/cleaveLand_result/t_plot/PC-3p-12333_982_XM_021131518.1_1542_TPlot.pdf	0	0	NA	NA	NA	0	0	NA	NA	NA	79.2048	0	0	3.9892e-35	3.86508e-34	yes	GO:0032549(ribonucleoside binding);GO:1901265(nucleoside phosphate binding);GO:0017111(nucleoside-triphosphatase activity);GO:0036094(small molecule binding);GO:0044249(cellular biosynthetic process);GO:0044238(primary metabolic process);GO:1901564(organonitrogen compound metabolic process);GO:0017076(purine nucleotide binding);GO:0003924(GTPase activity);GO:1901363(heterocyclic compound binding)…	ko03013(RNA transport)
PC-3p-12333_982	XM_021131735.1	592	619	610	-42.7	-28.6	0.669789	11	3-17,617-603;18-24,598-592	1-2,619-618[UP5];x-x,602-599[BULt]	(((((((....(((((((((((((((..&..)))))))))))))))----)))))))	CCAGCAAUGCCCUGAUAAGGUUCAAUGG&UUGUUGGGCUUUAUCAG----UUGCUGG	0	0	NA	NA	NA	1	32.684	4	0.999782	Output/R8h/cleaveLand_result/t_plot/PC-3p-12333_982_XM_021131735.1_610_TPlot.pdf	1	32.4181	4	0.999838	Output/R24h/cleaveLand_result/t_plot/PC-3p-12333_982_XM_021131735.1_610_TPlot.pdf	0	32.684	32.4181	8.5335e-08	8.81903e-08	yes	GO:0003824(catalytic activity);GO:0016757(transferase activity, transferring glycosyl groups);GO:0016740(transferase activity)	ko00052(Galactose metabolism)
PC-3p-12333_982	XM_021135001.1	1342	1365	1356	-42.7	-28.3	0.662763	8	2-15,1364-1351;16-20,1349-1345;22-24,1344-1342	1-1,1365-1365[UP5];x-x,1350-1350[BULt];21-21,x-x[BULq]	(((-(((((.((((((((((((((.&.))))))))))))))-))))).)))	CCA-CAGCUCGGUGGGGUCCAACAU&UUGUUGGGCUUUAUC-AGUUGCUGG	0	0	NA	NA	NA	0	0	NA	NA	NA	1	32.4181	4	0.999959	Output/R24h/cleaveLand_result/t_plot/PC-3p-12333_982_XM_021135001.1_1356_TPlot.pdf	0	0	32.4181	8.3342e-15	9.59436e-15	yes	GO:0016491(oxidoreductase activity);GO:0003824(catalytic activity);GO:0019748(secondary metabolic process);GO:0051213(dioxygenase activity);GO:0008152(metabolic process)	ko04144(Endocytosis);ko01100(Metabolic pathways);ko01230(Biosynthesis of amino acids);ko01110(Biosynthesis of secondary metabolites);ko00710(Carbon fixation in photosynthetic organisms);ko00520(Amino sugar and nucleotide sugar metabolism);ko00010(Glycolysis / Gluconeogenesis);ko01200(Carbon metabolism);ko00130(Ubiquinone and other terpenoid-quinone biosynthesis)
PC-3p-12333_982	XM_021137289.1	1032	1060	1046	-42.7	-28.2	0.660422	15.5	2-7,1059-1054;8-19,1048-1037;21-24,1035-1032	1-1,1060-1060[UP5];x-x,1053-1049[BULt];20-20,1036-1036[SIL]	((((.((((((((((((.....((((((.&.))))))-----)))))))))))).))))	CCAGGAAUUGAUGAGGUUUGCUCCAACAC&UUGUUGG-----GCUUUAUCAGUUGCUGG	0	0	NA	NA	NA	1	32.684	4	0.999964	Output/R8h/cleaveLand_result/t_plot/PC-3p-12333_982_XM_021137289.1_1046_TPlot.pdf	0	0	NA	NA	NA	0	32.684	0	6.3879e-15	9.59436e-15	yes	GO:0072655(establishment of protein localization to mitochondrion);GO:0031224(intrinsic component of membrane);GO:0070727(cellular macromolecule localization);GO:0032555(purine ribonucleotide binding);GO:0006886(intracellular protein transport);GO:0043226(organelle);GO:1901265(nucleoside phosphate binding);GO:0044429(mitochondrial part);GO:0015031(protein transport);GO:0044237(cellular metabolic …	NA
PC-3p-12333_982	XM_021139381.1	477	501	492	-42.7	-30.2	0.70726	8	1-10,501-492;12-16,490-486;18-22,484-480;23-24,478-477	11-11,491-491[SIL];17-17,485-485[SIL];x-x,479-479[BULt]	((.(((((.(((((.((((((((((&)))))))))).))))).)))))-))	CCAAGCAAGUGAUAUGGCUCAGCGA&UUGUUGGGCUUUAUCAGUUGCU-GG	1	39.6024	4	0.887922	Output/R0h/cleaveLand_result/t_plot/PC-3p-12333_982_XM_021139381.1_492_TPlot.pdf	0	0	NA	NA	NA	0	0	NA	NA	NA	39.6024	0	0	6.3194e-18	1.52182e-17	yes	GO:0034715(pICln-Sm protein complex);GO:0008152(metabolic process);GO:0090304(nucleic acid metabolic process);GO:1990234(transferase complex);GO:0022613(ribonucleoprotein complex biogenesis);GO:0006397(mRNA processing);GO:1901360(organic cyclic compound metabolic process);GO:0071826(ribonucleoprotein complex subunit organization);GO:0022607(cellular component assembly);GO:0016070(RNA metabolic pr…	ko03013(RNA transport)
PC-3p-123460_58	XM_016076439.2	706	720	711	-38.7	-25.5	0.658915	3.5	11-23,719-707	10-10,720-720[SIL];24-24,706-706[UP3]	.(((((((((((((.&.))))))))))))).	CGUCAGGCCCUCCGU&AAAUACAAAUCGGAG	1	39.6024	4	0.78666	Output/R0h/cleaveLand_result/t_plot/PC-3p-123460_58_XM_016076439.2_711_TPlot.pdf	0	0	NA	NA	NA	0	0	NA	NA	NA	39.6024	0	0	6.3194e-18	1.52182e-17	yes	GO:0051234(establishment of localization);GO:1901564(organonitrogen compound metabolic process);GO:0006518(peptide metabolic process);GO:0010467(gene expression);GO:0044238(primary metabolic process);GO:0043604(amide biosynthetic process);GO:0044249(cellular biosynthetic process);GO:0051179(localization);GO:0044260(cellular macromolecule metabolic process);GO:0031224(intrinsic component of membra…	NA
PC-3p-123460_58	XM_016103768.2	1857	1881	1871	-38.7	-28.1	0.726098	11.5	1-6,1881-1876;11-24,1870-1857	7-10,1875-1871[AILt]	((((((((((((((.....((((((&))))))-....))))))))))))))	AGUCAGGCCUUCCGUUAUGGUAUUU&AAAUAC-AAAUCGGAGGGUCUGAUU	0	0	NA	NA	NA	1	32.684	4	0.47451	Output/R8h/cleaveLand_result/t_plot/PC-3p-123460_58_XM_016103768.2_1871_TPlot.pdf	0	0	NA	NA	NA	0	32.684	0	6.3879e-15	9.59436e-15	yes	GO:0043229(intracellular organelle);GO:0044437(vacuolar part);GO:0043227(membrane-bounded organelle);GO:0005774(vacuolar membrane);GO:0044464(cell part);GO:0044424(intracellular part);GO:0044446(intracellular organelle part);GO:0005773(vacuole);GO:0098588(bounding membrane of organelle);GO:0044444(cytoplasmic part);GO:0044422(organelle part);GO:0031090(organelle membrane);GO:0005623(cell);GO:0016…	NA
PC-3p-123460_58	XM_016116560.2	1911	1934	1925	-38.7	-25.5	0.658915	14.5	6-8,1929-1927;10-21,1925-1914	1-5,1934-1930[UP5];9-9,1926-1926[SIL];22-24,1913-1911[UP3]	...((((((((((((.(((.....&.....))).))))))))))))...	AUCCAGAUCCUCCGAAUUGGGCAG&AAAUACAAAUCGGAGGGUCUGAUU	0	0	NA	NA	NA	0	0	NA	NA	NA	1	32.4181	4	0.837125	Output/R24h/cleaveLand_result/t_plot/PC-3p-123460_58_XM_016116560.2_1925_TPlot.pdf	0	0	32.4181	8.3342e-15	9.59436e-15	yes	GO:0031224(intrinsic component of membrane);GO:0044425(membrane part);GO:0016020(membrane);GO:0016021(integral component of membrane)	ko01100(Metabolic pathways);ko00600(Sphingolipid metabolism)
PC-3p-123460_58	XM_016117292.2	1880	1903	1894	-38.7	-25.5	0.658915	14.5	6-8,1898-1896;10-21,1894-1883	1-5,1903-1899[UP5];9-9,1895-1895[SIL];22-24,1882-1880[UP3]	...((((((((((((.(((.....&.....))).))))))))))))...	AUCCAGAUCCUCCGAGUUGGACAG&AAAUACAAAUCGGAGGGUCUGAUU	0	0	NA	NA	NA	2	65.368	2	0.462717	Output/R8h/cleaveLand_result/t_plot/PC-3p-123460_58_XM_016117292.2_1894_TPlot.pdf	0	0	NA	NA	NA	0	65.368	0	4.0777e-29	2.60335e-28	yes	GO:0016020(membrane);GO:0016021(integral component of membrane);GO:0031224(intrinsic component of membrane);GO:0044425(membrane part)	ko01100(Metabolic pathways);ko00600(Sphingolipid metabolism)
PC-3p-123460_58	XM_021127629.1	718	732	723	-38.7	-25.5	0.658915	3.5	11-23,731-719	10-10,732-732[SIL];24-24,718-718[UP3]	.(((((((((((((.&.))))))))))))).	CGUCAGGCCCUCCGU&AAAUACAAAUCGGAG	1	39.6024	4	0.774558	Output/R0h/cleaveLand_result/t_plot/PC-3p-123460_58_XM_021127629.1_723_TPlot.pdf	0	0	NA	NA	NA	0	0	NA	NA	NA	39.6024	0	0	6.3194e-18	1.52182e-17	yes	GO:0051234(establishment of localization);GO:1901564(organonitrogen compound metabolic process);GO:0006518(peptide metabolic process);GO:0010467(gene expression);GO:0044238(primary metabolic process);GO:0043604(amide biosynthetic process);GO:0044249(cellular biosynthetic process);GO:0051179(localization);GO:0044260(cellular macromolecule metabolic process);GO:0031224(intrinsic component of membra…	NA
PC-3p-123460_58	XM_021140428.1	452	476	467	-38.7	-25.2	0.651163	7.5	1-3,476-474;5-18,472-459;19-22,457-454	4-4,473-473[SIL];x-x,458-458[BULt];23-24,453-452[UP3]	..((((.((((((((((((((.(((&))).))))))))))))))-))))..	GCUCAGCAUCCUCUGGUUUGUUUUU&AAAUACAAAUCGGAGGGU-CUGAUU	1	39.6024	4	0.819205	Output/R0h/cleaveLand_result/t_plot/PC-3p-123460_58_XM_021140428.1_467_TPlot.pdf	0	0	NA	NA	NA	0	0	NA	NA	NA	39.6024	0	0	6.3194e-18	1.52182e-17	yes	NA	NA
PC-3p-124350_58	BGI_novel_T003600	789	811	802	-36.6	-25.8	0.704918	8	4-12,808-800;14-19,799-794;21-24,792-789	1-3,811-809[UP5];13-13,x-x[BULq];20-20,793-793[SIL]	((((.((((((-(((((((((...&...))))))))).)))))).))))	GGUAUAUCCGC-AUCCGAUCUCAG&AUAAGAUCGGAUUGUGGAUUUAUC	0	0	NA	NA	NA	1	32.684	4	0.216557	Output/R8h/cleaveLand_result/t_plot/PC-3p-124350_58_BGI_novel_T003600_802_TPlot.pdf	0	0	NA	NA	NA	0	32.684	0	6.3879e-15	9.59436e-15	yes	NA	ko03420(Nucleotide excision repair);ko03430(Mismatch repair);ko03030(DNA replication);ko03440(Homologous recombination)
PC-3p-124350_58	BGI_novel_T003933	229	251	242	-36.6	-24.2	0.661202	9	4-12,248-240;14-22,239-231	1-3,251-249[UP5];13-13,x-x[BULq];23-24,230-229[UP3]	..(((((((((-(((((((((...&...))))))))).)))))))))..	UCUAAAUCCAC-AUCUGAUCUAAG&AUAAGAUCGGAUUGUGGAUUUAUC	0	0	NA	NA	NA	1	32.684	4	0.851636	Output/R8h/cleaveLand_result/t_plot/PC-3p-124350_58_BGI_novel_T003933_242_TPlot.pdf	0	0	NA	NA	NA	0	32.684	0	6.3879e-15	9.59436e-15	yes	NA	NA
PC-3p-124350_58	XM_016082326.1	297	321	312	-36.6	-24.6	0.672131	13	7-21,315-301;23-24,298-297	1-6,321-316[UP5];22-22,300-299[AILt]	((..(((((((((((((((......&......)))))))))))))))-.))	GAGCAAAUCCACAAUCCGAACACCU&AUAAGAUCGGAUUGUGGAUUU-AUC	0	0	NA	NA	NA	0	0	NA	NA	NA	1	32.4181	4	0.636057	Output/R24h/cleaveLand_result/t_plot/PC-3p-124350_58_XM_016082326.1_312_TPlot.pdf	0	0	32.4181	8.3342e-15	9.59436e-15	yes	NA	NA
PC-3p-124350_58	XM_016088092.2	300	323	314	-36.6	-24.4	0.666667	12.5	5-21,319-303;24-24,300-300	1-4,323-320[UP5];22-23,302-301[SIL]	(..(((((((((((((((((....&....)))))))))))))))))..)	GUGAGGUCCACGGUUCGAUCCCAC&AUAAGAUCGGAUUGUGGAUUUAUC	1	39.6024	4	0.601307	Output/R0h/cleaveLand_result/t_plot/PC-3p-124350_58_XM_016088092.2_314_TPlot.pdf	1	32.684	4	0.670227	Output/R8h/cleaveLand_result/t_plot/PC-3p-124350_58_XM_016088092.2_314_TPlot.pdf	1	32.4181	4	0.682916	Output/R24h/cleaveLand_result/t_plot/PC-3p-124350_58_XM_016088092.2_314_TPlot.pdf	39.6024	32.684	32.4181	0.62164	0.621776	yes	GO:0046872(metal ion binding);GO:0009636(response to toxic substance);GO:0006979(response to oxidative stress);GO:0009664(plant-type cell wall organization);GO:0042743(hydrogen peroxide metabolic process);GO:0005488(binding);GO:0050896(response to stimulus);GO:0005618(cell wall);GO:0009505(plant-type cell wall);GO:0016043(cellular component organization);GO:0071554(cell wall organization or bioge…	ko00940(Phenylpropanoid biosynthesis);ko01100(Metabolic pathways);ko01110(Biosynthesis of secondary metabolites)
PC-3p-124350_58	XM_016091002.2	894	917	908	-36.6	-24.3	0.663934	6	1-6,917-912;8-21,910-897;23-24,895-894	7-7,911-911[SIL];22-22,896-896[SIL]	((.((((((((((((((.((((((&)))))).)))))))))))))).))	GAAAGGUUCAUAAUCCGUUCUUGU&AUAAGAUCGGAUUGUGGAUUUAUC	0	0	NA	NA	NA	1	32.684	4	0.698233	Output/R8h/cleaveLand_result/t_plot/PC-3p-124350_58_XM_016091002.2_908_TPlot.pdf	0	0	NA	NA	NA	0	32.684	0	6.3879e-15	9.59436e-15	yes	GO:0043167(ion binding);GO:0016021(integral component of membrane);GO:0098662(inorganic cation transmembrane transport);GO:0072509(divalent inorganic cation transmembrane transporter activity);GO:0016462(pyrophosphatase activity);GO:0015662(ATPase activity, coupled to transmembrane movement of ions, phosphorylative mechanism);GO:1901265(nucleoside phosphate binding);GO:0035639(purine ribonucleosi…	NA
PC-3p-124350_58	XM_016092863.2	534	560	551	-36.6	-24.3	0.663934	15	4-12,557-549;13-21,545-537	1-3,560-558[UP5];x-x,548-546[BULt];22-24,536-534[UP3]	...(((((((((...(((((((((...&...)))))))))---)))))))))...	UCCAAGUCCGCAAUCAUCCGAUCUACA&AUAAGAUCGGAU---UGUGGAUUUAUC	5	198.012	2	0.314537	Output/R0h/cleaveLand_result/t_plot/PC-3p-124350_58_XM_016092863.2_551_TPlot.pdf	0	0	NA	NA	NA	0	0	NA	NA	NA	198.012	0	0	9.9729e-87	9.0813e-85	yes	NA	NA
PC-3p-124350_58	XM_016095321.2	265	288	279	-36.6	-25.3	0.691257	12	6-23,283-266	1-5,288-284[UP5];24-24,265-265[UP3]	.((((((((((((((((((.....&.....)))))))))))))))))).	AAUGGAUCCACAAUCUGAUGCAGU&AUAAGAUCGGAUUGUGGAUUUAUC	2	79.2048	2	0.176658	Output/R0h/cleaveLand_result/t_plot/PC-3p-124350_58_XM_016095321.2_279_TPlot.pdf	0	0	NA	NA	NA	1	32.4181	4	0.55247	Output/R24h/cleaveLand_result/t_plot/PC-3p-124350_58_XM_016095321.2_279_TPlot.pdf	79.2048	0	32.4181	3.1075e-19	1.30585e-18	yes	GO:0016791(phosphatase activity);GO:0044237(cellular metabolic process);GO:0006807(nitrogen compound metabolic process);GO:0071704(organic substance metabolic process);GO:1901564(organonitrogen compound metabolic process);GO:0006464(cellular protein modification process);GO:0043170(macromolecule metabolic process);GO:0016311(dephosphorylation);GO:0016787(hydrolase activity);GO:0004721(phosphoprot…	NA
PC-3p-124350_58	XM_021124513.1	1064	1099	1086	-36.6	-23.9	0.653005	27	1-6,1099-1094;7-10,1089-1086;11-24,1077-1064	x-x,1093-1090[BULt];x-x,1085-1078[BULt]	((((((((((((((........((((....((((((&))))))----))))--------))))))))))))))	GAUGAGUCCACAAUGCCAGCUCCCGGGUGUUCUUGU&AUAAGA----UCGG--------AUUGUGGAUUUAUC	0	0	NA	NA	NA	1	32.684	4	0.872978	Output/R8h/cleaveLand_result/t_plot/PC-3p-124350_58_XM_021124513.1_1086_TPlot.pdf	0	0	NA	NA	NA	0	32.684	0	6.3879e-15	9.59436e-15	yes	NA	NA
PC-3p-124350_58	XM_021138832.1	929	951	942	-36.6	-24.3	0.663934	9.5	4-12,948-940;14-22,939-931	1-3,951-949[UP5];13-13,x-x[BULq];23-24,930-929[UP3]	..(((((((((-(((((((((...&...))))))))).)))))))))..	UCUGAAUCCAC-AUCUGAUCUAAG&AUAAGAUCGGAUUGUGGAUUUAUC	0	0	NA	NA	NA	1	32.684	4	0.818845	Output/R8h/cleaveLand_result/t_plot/PC-3p-124350_58_XM_021138832.1_942_TPlot.pdf	0	0	NA	NA	NA	0	32.684	0	6.3879e-15	9.59436e-15	yes	NA	NA
PC-3p-124677_58	XM_016092951.2	4410	4431	4422	-43.7	-29.6	0.677346	8	2-4,4430-4428;7-12,4425-4420;15-24,4419-4410	1-1,4431-4431[UP5];5-6,4427-4426[SIL];13-14,x-x[BULq]	((((((((((--((((((..(((.&.)))..))))))..))))))))))	GGUGCAGAAG--GGAACGGACGAG&AUCGGACGUUCCGAUUUCUGUACC	1	39.6024	4	0.268496	Output/R0h/cleaveLand_result/t_plot/PC-3p-124677_58_XM_016092951.2_4422_TPlot.pdf	3	98.052	2	0.119478	Output/R8h/cleaveLand_result/t_plot/PC-3p-124677_58_XM_016092951.2_4422_TPlot.pdf	0	0	NA	NA	NA	39.6024	98.052	0	9.3205e-24	4.28717e-23	yes	GO:0005515(protein binding);GO:0016772(transferase activity, transferring phosphorus-containing groups);GO:0003779(actin binding);GO:0006796(phosphate-containing compound metabolic process);GO:0009987(cellular process);GO:0016740(transferase activity);GO:0016301(kinase activity);GO:0016310(phosphorylation);GO:0006793(phosphorus metabolic process);GO:0003824(catalytic activity);GO:0005488(binding)…	NA
PC-3p-124677_58	XM_016093018.2	666	692	682	-43.7	-28.5	0.652174	8	2-8,691-685;9-16,683-676;17-21,674-670;22-24,668-666	1-1,692-692[UP5];x-x,684-684[BULt];x-x,675-675[BULt];x-x,669-669[BULt]	(((.(((((.((((((((.(((((((.&.)))))))-))))))))-)))))-)))	GGUCACAGAUAAUCGGGAGUGUCUGAA&AUCGGACG-UUCCGAUU-UCUGU-ACC	0	0	NA	NA	NA	1	32.684	4	0.826708	Output/R8h/cleaveLand_result/t_plot/PC-3p-124677_58_XM_016093018.2_682_TPlot.pdf	1	32.4181	4	0.837125	Output/R24h/cleaveLand_result/t_plot/PC-3p-124677_58_XM_016093018.2_682_TPlot.pdf	0	32.684	32.4181	8.5335e-08	8.81903e-08	yes	GO:0051649(establishment of localization in cell);GO:0005622(intracellular);GO:0005623(cell);GO:0010605(negative regulation of macromolecule metabolic process);GO:0051172(negative regulation of nitrogen compound metabolic process);GO:0070727(cellular macromolecule localization);GO:0065007(biological regulation);GO:0006612(protein targeting to membrane);GO:0070972(protein localization to endoplasm…	ko03060(Protein export)
PC-3p-124677_58	XM_016108371.2	1505	1536	1527	-43.7	-28.6	0.654462	14	2-3,1535-1534;5-15,1532-1522;16-24,1513-1505	1-1,1536-1536[UP5];4-4,1533-1533[SIL];x-x,1521-1514[BULt]	(((((((((........(((((((((((.((.&.)).)))))))))))--------)))))))))	GGUACAGGGUGGUUAUUAUCGGAAUGUUGGAA&AUCGGACGUUCCGAU--------UUCUGUACC	0	0	NA	NA	NA	1	32.684	4	0.778807	Output/R8h/cleaveLand_result/t_plot/PC-3p-124677_58_XM_016108371.2_1527_TPlot.pdf	0	0	NA	NA	NA	0	32.684	0	6.3879e-15	9.59436e-15	yes	GO:0006820(anion transport);GO:0051234(establishment of localization);GO:0015098(molybdate ion transmembrane transporter activity);GO:0022857(transmembrane transporter activity);GO:0051179(localization);GO:0008509(anion transmembrane transporter activity);GO:0006811(ion transport);GO:0015075(ion transmembrane transporter activity);GO:0031224(intrinsic component of membrane);GO:0015698(inorganic a…	NA
PC-3p-127107_56	BGI_novel_T000049	3506	3529	3519	-36.6	-24.4	0.666667	10	1-5,3529-3525;6-11,3523-3518;12-19,3515-3508	x-x,3524-3524[BULt];x-x,3517-3516[BULt];20-21,3507-3506[UP3]	..((((((((..((((((.(((((&)))))-))))))--))))))))..	GUUGGUUCCAGAAGGUUCUUUGGA&UCUAA-GAGCCU--UGGAACCAUA	2	79.2048	2	0.880819	Output/R0h/cleaveLand_result/t_plot/PC-3p-127107_56_BGI_novel_T000049_3519_TPlot.pdf	0	0	NA	NA	NA	0	0	NA	NA	NA	79.2048	0	0	3.9892e-35	3.86508e-34	yes	NA	NA
PC-3p-127107_56	BGI_novel_T000220	1878	1898	1889	-36.6	-27.1	0.740437	11	6-20,1893-1879	1-5,1898-1894[UP5];21-21,1878-1878[UP3]	.(((((((((((((((.....&.....))))))))))))))).	AAUGGUUCCAAGGUUCAAAAU&UCUAAGAGCCUUGGAACCAUA	2	79.2048	2	0.287363	Output/R0h/cleaveLand_result/t_plot/PC-3p-127107_56_BGI_novel_T000220_1889_TPlot.pdf	1	32.684	4	0.741642	Output/R8h/cleaveLand_result/t_plot/PC-3p-127107_56_BGI_novel_T000220_1889_TPlot.pdf	3	97.2542	2	0.369761	Output/R24h/cleaveLand_result/t_plot/PC-3p-127107_56_BGI_novel_T000220_1889_TPlot.pdf	79.2048	32.684	97.2542	1.2173e-07	1.25706e-07	yes	GO:0016705(oxidoreductase activity, acting on paired donors, with incorporation or reduction of molecular oxygen);GO:0046872(metal ion binding);GO:0043167(ion binding);GO:0016021(integral component of membrane);GO:0046906(tetrapyrrole binding);GO:0008152(metabolic process);GO:0016020(membrane);GO:0044425(membrane part);GO:0031224(intrinsic component of membrane);GO:0004497(monooxygenase activity)…	ko00906(Carotenoid biosynthesis)
PC-3p-127107_56	BGI_novel_T001990	448	468	459	-36.6	-24.4	0.666667	8.5	1-3,468-466;5-18,464-451	4-4,465-465[SIL];19-21,450-448[UP3]	...((((((((((((((.(((&))).))))))))))))))...	CGAGGUUUCGGGGUUCUCAGA&UCUAAGAGCCUUGGAACCAUA	0	0	NA	NA	NA	1	32.684	4	0.999801	Output/R8h/cleaveLand_result/t_plot/PC-3p-127107_56_BGI_novel_T001990_459_TPlot.pdf	0	0	NA	NA	NA	0	32.684	0	6.3879e-15	9.59436e-15	yes	GO:0016021(integral component of membrane);GO:0031224(intrinsic component of membrane);GO:0044425(membrane part);GO:0016020(membrane)	NA
PC-3p-127107_56	BGI_novel_T003945	523	541	532	-36.6	-25.5	0.696721	8	2-10,540-532;13-20,531-524	1-1,541-541[UP5];11-12,x-x[BULq];21-21,523-523[UP3]	.((((((((--(((((((((.&.)))))))))..)))))))).	AGUGGUUCU--GGCUCUUGGU&UCUAAGAGCCUUGGAACCAUA	0	0	NA	NA	NA	0	0	NA	NA	NA	1	32.4181	4	0.978916	Output/R24h/cleaveLand_result/t_plot/PC-3p-127107_56_BGI_novel_T003945_532_TPlot.pdf	0	0	32.4181	8.3342e-15	9.59436e-15	yes	GO:0043229(intracellular organelle);GO:0043226(organelle);GO:0046914(transition metal ion binding);GO:0032259(methylation);GO:0016741(transferase activity, transferring one-carbon groups);GO:0008270(zinc ion binding);GO:0005623(cell);GO:0008168(methyltransferase activity);GO:0044424(intracellular part);GO:0005622(intracellular);GO:0046872(metal ion binding);GO:0003824(catalytic activity);GO:00081…	ko00310(Lysine degradation)
PC-3p-127107_56	BGI_novel_T008904	2588	2611	2599	-36.6	-26.3	0.718579	11	1-3,2611-2609;4-6,2604-2602;8-20,2601-2589	x-x,2608-2605[BULt];7-7,x-x[BULq];21-21,2588-2588[UP3]	.(((((((((((((-(((....(((&)))----))).))))))))))))).	GAUGGUUCCAAGGC-CUUCCCAAGA&UCU----AAGAGCCUUGGAACCAUA	1	39.6024	4	0.841044	Output/R0h/cleaveLand_result/t_plot/PC-3p-127107_56_BGI_novel_T008904_2599_TPlot.pdf	0	0	NA	NA	NA	5	162.09	2	0.530841	Output/R24h/cleaveLand_result/t_plot/PC-3p-127107_56_BGI_novel_T008904_2599_TPlot.pdf	39.6024	0	162.09	7.3966e-47	1.74465e-45	yes	NA	NA
PC-3p-127107_56	BGI_novel_T011647	1390	1411	1402	-36.6	-23.9	0.653005	9	1-7,1411-1405;9-14,1403-1398;15-19,1396-1392	8-8,1404-1404[SIL];x-x,1397-1397[BULt];20-21,1391-1390[UP3]	..(((((.((((((.(((((((&))))))).))))))-)))))..	CUUGGUUCCCGGGGGUUUUGGA&UCUAAGAGCCUUGG-AACCAUA	0	0	NA	NA	NA	1	32.684	4	0.999999	Output/R8h/cleaveLand_result/t_plot/PC-3p-127107_56_BGI_novel_T011647_1402_TPlot.pdf	0	0	NA	NA	NA	0	32.684	0	6.3879e-15	9.59436e-15	yes	GO:0009987(cellular process);GO:0006520(cellular amino acid metabolic process);GO:0006725(cellular aromatic compound metabolic process);GO:0034654(nucleobase-containing compound biosynthetic process);GO:0006807(nitrogen compound metabolic process);GO:0032559(adenyl ribonucleotide binding);GO:0034641(cellular nitrogen compound metabolic process);GO:1901137(carbohydrate derivative biosynthetic proc…	ko01100(Metabolic pathways);ko00240(Pyrimidine metabolism)
PC-3p-127107_56	BGI_novel_T013890	1210	1233	1223	-36.6	-25.1	0.685792	8	1-3,1233-1231;4-14,1229-1219;15-18,1216-1213	x-x,1230-1230[BULt];x-x,1218-1217[BULt];19-21,1212-1210[UP3]	...((((..(((((((((((.(((&)))-)))))))))))--))))...	AACGGUUUGCCGAGGCUCUUAAGA&UCU-AAGAGCCUUGG--AACCAUA	0	0	NA	NA	NA	1	32.684	4	0.99456	Output/R8h/cleaveLand_result/t_plot/PC-3p-127107_56_BGI_novel_T013890_1223_TPlot.pdf	1	32.4181	4	0.995476	Output/R24h/cleaveLand_result/t_plot/PC-3p-127107_56_BGI_novel_T013890_1223_TPlot.pdf	0	32.684	32.4181	8.5335e-08	8.81903e-08	yes	GO:0016787(hydrolase activity);GO:0031224(intrinsic component of membrane);GO:0044425(membrane part);GO:0016021(integral component of membrane);GO:0008152(metabolic process);GO:0016020(membrane);GO:0003824(catalytic activity)	ko00900(Terpenoid backbone biosynthesis)
PC-3p-127107_56	XM_016077050.2	1586	1605	1597	-36.6	-25.3	0.691257	6	1-9,1605-1597;11-14,1596-1593;17-21,1590-1586	10-10,x-x[BULq];15-16,1592-1591[SIL]	(((((..((((-(((((((((&))))))))).))))..)))))	UAUGGGACCGA-GCUCUUGGA&UCUAAGAGCCUUGGAACCAUA	0	0	NA	NA	NA	0	0	NA	NA	NA	1	32.4181	4	0.988128	Output/R24h/cleaveLand_result/t_plot/PC-3p-127107_56_XM_016077050.2_1597_TPlot.pdf	0	0	32.4181	8.3342e-15	9.59436e-15	yes	GO:0044237(cellular metabolic process);GO:0006099(tricarboxylic acid cycle);GO:0019752(carboxylic acid metabolic process);GO:0016740(transferase activity);GO:0072350(tricarboxylic acid metabolic process);GO:0046912(transferase activity, transferring acyl groups, acyl groups converted into alkyl on transfer);GO:0071704(organic substance metabolic process);GO:0044238(primary metabolic process);GO:0…	ko01210(2-Oxocarboxylic acid metabolism);ko00020(Citrate cycle (TCA cycle));ko01200(Carbon metabolism);ko01230(Biosynthesis of amino acids);ko01110(Biosynthesis of secondary metabolites);ko01100(Metabolic pathways);ko00630(Glyoxylate and dicarboxylate metabolism)
PC-3p-127107_56	XM_016077051.2	1664	1683	1675	-36.6	-25.3	0.691257	6	1-9,1683-1675;11-14,1674-1671;17-21,1668-1664	10-10,x-x[BULq];15-16,1670-1669[SIL]	(((((..((((-(((((((((&))))))))).))))..)))))	UAUGGGACCGA-GCUCUUGGA&UCUAAGAGCCUUGGAACCAUA	1	39.6024	4	0.970185	Output/R0h/cleaveLand_result/t_plot/PC-3p-127107_56_XM_016077051.2_1675_TPlot.pdf	1	32.684	4	0.98556	Output/R8h/cleaveLand_result/t_plot/PC-3p-127107_56_XM_016077051.2_1675_TPlot.pdf	1	32.4181	4	0.98757	Output/R24h/cleaveLand_result/t_plot/PC-3p-127107_56_XM_016077051.2_1675_TPlot.pdf	39.6024	32.684	32.4181	0.62164	0.621776	yes	GO:0044237(cellular metabolic process);GO:0006099(tricarboxylic acid cycle);GO:0019752(carboxylic acid metabolic process);GO:0016740(transferase activity);GO:0072350(tricarboxylic acid metabolic process);GO:0046912(transferase activity, transferring acyl groups, acyl groups converted into alkyl on transfer);GO:0071704(organic substance metabolic process);GO:0044238(primary metabolic process);GO:0…	ko01210(2-Oxocarboxylic acid metabolism);ko00020(Citrate cycle (TCA cycle));ko01200(Carbon metabolism);ko01230(Biosynthesis of amino acids);ko01110(Biosynthesis of secondary metabolites);ko01100(Metabolic pathways);ko00630(Glyoxylate and dicarboxylate metabolism)
PC-3p-127107_56	XM_016078484.2	1117	1137	1128	-36.6	-25.9	0.70765	7	1-3,1137-1135;6-15,1132-1123;17-21,1121-1117	4-5,1134-1133[SIL];16-16,1122-1122[SIL]	(((((.((((((((((..(((&)))..)))))))))).)))))	UGUGGAUCCAAGGCUUGAAGG&UCUAAGAGCCUUGGAACCAUA	1	39.6024	4	0.887922	Output/R0h/cleaveLand_result/t_plot/PC-3p-127107_56_XM_016078484.2_1128_TPlot.pdf	0	0	NA	NA	NA	0	0	NA	NA	NA	39.6024	0	0	6.3194e-18	1.52182e-17	yes	GO:0044260(cellular macromolecule metabolic process);GO:0008152(metabolic process);GO:0016740(transferase activity);GO:0032555(purine ribonucleotide binding);GO:0016773(phosphotransferase activity, alcohol group as acceptor);GO:0038023(signaling receptor activity);GO:1901363(heterocyclic compound binding);GO:0032553(ribonucleotide binding);GO:0005488(binding);GO:0043168(anion binding);GO:0004871(…	NA
PC-3p-127107_56	XM_016079665.2	358	379	370	-36.6	-24.6	0.672131	9	1-4,379-376;7-10,373-370;11-19,368-360	5-6,375-374[SIL];x-x,369-369[BULt];20-21,359-358[UP3]	..(((((((((.((((..((((&))))..))))-)))))))))..	GCUGGUUCCAAUGGCUACUGGA&UCUAAGAGCC-UUGGAACCAUA	1	39.6024	4	0.997417	Output/R0h/cleaveLand_result/t_plot/PC-3p-127107_56_XM_016079665.2_370_TPlot.pdf	0	0	NA	NA	NA	0	0	NA	NA	NA	39.6024	0	0	6.3194e-18	1.52182e-17	yes	GO:0004175(endopeptidase activity);GO:0008152(metabolic process);GO:0043231(intracellular membrane-bounded organelle);GO:0071704(organic substance metabolic process);GO:0005623(cell);GO:0044248(cellular catabolic process);GO:0043229(intracellular organelle);GO:0010467(gene expression);GO:0005737(cytoplasm);GO:0070011(peptidase activity, acting on L-amino acid peptides);GO:0044424(intracellular pa…	NA
PC-3p-127107_56	XM_016079850.2	964	985	976	-36.6	-24.5	0.669399	5	1-12,985-974;14-17,971-968;19-21,966-964	13-13,973-972[AILt];18-18,967-967[SIL]	(((.((((..((((((((((((&))))))))))))-.)))).)))	UAUAGUUCUGGAGGCUCUUAGA&UCUAAGAGCCUU-GGAACCAUA	0	0	NA	NA	NA	0	0	NA	NA	NA	1	32.4181	4	0.99967	Output/R24h/cleaveLand_result/t_plot/PC-3p-127107_56_XM_016079850.2_976_TPlot.pdf	0	0	32.4181	8.3342e-15	9.59436e-15	yes	GO:0009987(cellular process);GO:0015301(anion:anion antiporter activity);GO:0006839(mitochondrial transport);GO:0005623(cell);GO:0022804(active transmembrane transporter activity);GO:0031966(mitochondrial membrane);GO:0008509(anion transmembrane transporter activity);GO:0031967(organelle envelope);GO:0005743(mitochondrial inner membrane);GO:0051649(establishment of localization in cell);GO:007184…	NA
PC-3p-127107_56	XM_016081719.2	866	887	878	-36.6	-24.3	0.663934	6.5	1-5,887-883;7-14,881-874;15-18,872-869	6-6,882-882[SIL];x-x,873-873[BULt];19-21,868-866[UP3]	...((((.((((((((.(((((&))))).))))))))-))))...	CGGGGUUAUCAAGGCUGUUAGA&UCUAAGAGCCUUGG-AACCAUA	1	39.6024	4	0.999611	Output/R0h/cleaveLand_result/t_plot/PC-3p-127107_56_XM_016081719.2_878_TPlot.pdf	0	0	NA	NA	NA	0	0	NA	NA	NA	39.6024	0	0	6.3194e-18	1.52182e-17	yes	GO:1901265(nucleoside phosphate binding);GO:1901363(heterocyclic compound binding);GO:0043168(anion binding);GO:0015399(primary active transmembrane transporter activity);GO:0016462(pyrophosphatase activity);GO:0022804(active transmembrane transporter activity);GO:0005524(ATP binding);GO:0042623(ATPase activity, coupled);GO:0003824(catalytic activity);GO:0016887(ATPase activity);GO:0042910(xenobi…	ko00920(Sulfur metabolism);ko02010(ABC transporters);ko03018(RNA degradation)
PC-3p-127107_56	XM_016083821.2	1390	1411	1402	-36.6	-23.9	0.653005	9	1-7,1411-1405;9-14,1403-1398;15-19,1396-1392	8-8,1404-1404[SIL];x-x,1397-1397[BULt];20-21,1391-1390[UP3]	..(((((.((((((.(((((((&))))))).))))))-)))))..	CUUGGUUCCCGGGGGUUUUGGA&UCUAAGAGCCUUGG-AACCAUA	0	0	NA	NA	NA	1	32.684	4	0.999999	Output/R8h/cleaveLand_result/t_plot/PC-3p-127107_56_XM_016083821.2_1402_TPlot.pdf	0	0	NA	NA	NA	0	32.684	0	6.3879e-15	9.59436e-15	yes	GO:0009987(cellular process);GO:0006520(cellular amino acid metabolic process);GO:0006725(cellular aromatic compound metabolic process);GO:0034654(nucleobase-containing compound biosynthetic process);GO:0006807(nitrogen compound metabolic process);GO:0032559(adenyl ribonucleotide binding);GO:0034641(cellular nitrogen compound metabolic process);GO:1901137(carbohydrate derivative biosynthetic proc…	ko01100(Metabolic pathways);ko00240(Pyrimidine metabolism)
PC-3p-127107_56	XM_016084542.2	742	765	753	-36.6	-24.6	0.672131	11	1-6,765-760;7-7,756-756;9-18,754-745	x-x,759-757[BULt];8-8,755-755[SIL];19-21,744-742[UP3]	...((((((((((.(...((((((&))))))---).))))))))))...	CAGGGUUCCAAGGGUGGACUUAGA&UCUAAG---AGCCUUGGAACCAUA	0	0	NA	NA	NA	2	65.368	2	0.908837	Output/R8h/cleaveLand_result/t_plot/PC-3p-127107_56_XM_016084542.2_753_TPlot.pdf	0	0	NA	NA	NA	0	65.368	0	4.0777e-29	2.60335e-28	yes	NA	ko00195(Photosynthesis);ko01100(Metabolic pathways)
PC-3p-127107_56	XM_016085235.2	1284	1306	1295	-36.6	-23.8	0.650273	10	1-4,1306-1303;5-13,1300-1292;16-20,1289-1285	x-x,1302-1301[BULt];14-15,1291-1290[SIL];21-21,1284-1284[UP3]	.(((((..(((((((((..((((&))))--)))))))))..))))).	GAUGGUGACAGGGUUCUGAUGGA&UCUA--AGAGCCUUGGAACCAUA	0	0	NA	NA	NA	0	0	NA	NA	NA	1	32.4181	4	1	Output/R24h/cleaveLand_result/t_plot/PC-3p-127107_56_XM_016085235.2_1295_TPlot.pdf	0	0	32.4181	8.3342e-15	9.59436e-15	yes	NA	NA
PC-3p-127107_56	XM_016086001.2	1528	1548	1538	-36.6	-25.3	0.691257	7.5	1-7,1548-1542;8-11,1540-1537;13-18,1536-1531	x-x,1541-1541[BULt];12-12,x-x[BULq];19-21,1530-1528[UP3]	...((((((-((((.(((((((&)))))))-)))).))))))...	UUCGGUUCC-AGGCUUCUUAGG&UCUAAGA-GCCUUGGAACCAUA	1	39.6024	4	0.974264	Output/R0h/cleaveLand_result/t_plot/PC-3p-127107_56_XM_016086001.2_1538_TPlot.pdf	0	0	NA	NA	NA	0	0	NA	NA	NA	39.6024	0	0	6.3194e-18	1.52182e-17	yes	GO:0005694(chromosome);GO:0000280(nuclear division);GO:0000228(nuclear chromosome);GO:0051321(meiotic cell cycle);GO:0031981(nuclear lumen);GO:0070013(intracellular organelle lumen);GO:0005623(cell);GO:0031974(membrane-enclosed lumen);GO:0009987(cellular process);GO:0044424(intracellular part);GO:0043227(membrane-bounded organelle);GO:0030983(mismatched DNA binding);GO:0022402(cell cycle process)…	ko03430(Mismatch repair)
PC-3p-127107_56	XM_016086845.2	624	643	635	-36.6	-25.2	0.688525	6.5	1-3,643-641;7-21,638-624	4-6,640-639[AILq]	(((((((((((((((..-(((&)))...)))))))))))))))	UAUGGUUUCAAGGCUGA-AGA&UCUAAGAGCCUUGGAACCAUA	0	0	NA	NA	NA	1	32.684	4	0.992578	Output/R8h/cleaveLand_result/t_plot/PC-3p-127107_56_XM_016086845.2_635_TPlot.pdf	3	97.2542	2	0.812234	Output/R24h/cleaveLand_result/t_plot/PC-3p-127107_56_XM_016086845.2_635_TPlot.pdf	0	32.684	97.2542	2.7524e-25	1.29044e-24	yes	GO:0018108(peptidyl-tyrosine phosphorylation);GO:0006468(protein phosphorylation);GO:0006807(nitrogen compound metabolic process);GO:0071704(organic substance metabolic process);GO:1901265(nucleoside phosphate binding);GO:0005524(ATP binding);GO:0035639(purine ribonucleoside triphosphate binding);GO:0032559(adenyl ribonucleotide binding);GO:0003824(catalytic activity);GO:0006464(cellular protein …	ko04626(Plant-pathogen interaction)
PC-3p-127107_56	XM_016086846.2	674	693	685	-36.6	-25.2	0.688525	6.5	1-3,693-691;7-21,688-674	4-6,690-689[AILq]	(((((((((((((((..-(((&)))...)))))))))))))))	UAUGGUUUCAAGGCUGA-AGA&UCUAAGAGCCUUGGAACCAUA	1	39.6024	4	0.979737	Output/R0h/cleaveLand_result/t_plot/PC-3p-127107_56_XM_016086846.2_685_TPlot.pdf	0	0	NA	NA	NA	2	64.8361	2	0.798999	Output/R24h/cleaveLand_result/t_plot/PC-3p-127107_56_XM_016086846.2_685_TPlot.pdf	39.6024	0	64.8361	4.7251e-14	5.31115e-14	yes	GO:0018108(peptidyl-tyrosine phosphorylation);GO:0006468(protein phosphorylation);GO:0006807(nitrogen compound metabolic process);GO:0071704(organic substance metabolic process);GO:1901265(nucleoside phosphate binding);GO:0005524(ATP binding);GO:0035639(purine ribonucleoside triphosphate binding);GO:0032559(adenyl ribonucleotide binding);GO:0003824(catalytic activity);GO:0006464(cellular protein …	ko04626(Plant-pathogen interaction)
PC-3p-127107_56	XM_016087079.2	666	687	677	-36.6	-26.5	0.724044	7	1-7,687-681;8-15,679-672;17-18,670-669	x-x,680-680[BULt];16-16,671-671[SIL];19-21,668-666[UP3]	...((.((((((((.(((((((&)))))))-)))))))).))...	ACAGGGUCCAAGGCUUCUUGGA&UCUAAGA-GCCUUGGAACCAUA	1	39.6024	4	0.805403	Output/R0h/cleaveLand_result/t_plot/PC-3p-127107_56_XM_016087079.2_677_TPlot.pdf	1	32.684	4	0.86119	Output/R8h/cleaveLand_result/t_plot/PC-3p-127107_56_XM_016087079.2_677_TPlot.pdf	0	0	NA	NA	NA	39.6024	32.684	0	8.6245e-09	9.35023e-09	yes	GO:0016740(transferase activity);GO:0009987(cellular process);GO:0006644(phospholipid metabolic process);GO:0008152(metabolic process);GO:0090407(organophosphate biosynthetic process);GO:0006657(CDP-choline pathway);GO:1901576(organic substance biosynthetic process);GO:0006629(lipid metabolic process);GO:0019637(organophosphate metabolic process);GO:0003824(catalytic activity);GO:0046486(glycerol…	ko00564(Glycerophospholipid metabolism);ko01100(Metabolic pathways)
PC-3p-127107_56	XM_016090403.2	806	829	819	-36.6	-24.2	0.661202	10	2-6,828-824;7-11,822-818;12-18,815-809	1-1,829-829[UP5];x-x,823-823[BULt];x-x,817-816[BULt];19-21,808-806[UP3]	...(((((((..(((((.(((((.&.)))))-)))))--)))))))...	UGCGGUUCCAAAAGGCUACUUAGC&UCUAAG-AGCCU--UGGAACCAUA	1	39.6024	4	0.999893	Output/R0h/cleaveLand_result/t_plot/PC-3p-127107_56_XM_016090403.2_819_TPlot.pdf	0	0	NA	NA	NA	0	0	NA	NA	NA	39.6024	0	0	6.3194e-18	1.52182e-17	yes	GO:0009719(response to endogenous stimulus);GO:0050896(response to stimulus);GO:0010033(response to organic substance);GO:0042221(response to chemical);GO:0009725(response to hormone);GO:0009733(response to auxin)	ko04075(Plant hormone signal transduction)
PC-3p-127107_56	XM_016092749.2	455	478	469	-36.6	-23.8	0.650273	8.5	1-7,478-472;9-13,470-466;14-20,462-456	8-8,471-471[SIL];x-x,465-463[BULt];21-21,455-455[UP3]	.(((((((...(((((.(((((((&))))))).)))))---))))))).	GGUGGUUCUGUCAAGGGUUUUGGA&UCUAAGAGCCUUG---GAACCAUA	0	0	NA	NA	NA	1	32.684	4	0.999999	Output/R8h/cleaveLand_result/t_plot/PC-3p-127107_56_XM_016092749.2_469_TPlot.pdf	0	0	NA	NA	NA	0	32.684	0	6.3879e-15	9.59436e-15	yes	GO:0032774(RNA biosynthetic process);GO:0090304(nucleic acid metabolic process);GO:1901576(organic substance biosynthetic process);GO:0034654(nucleobase-containing compound biosynthetic process);GO:0043170(macromolecule metabolic process);GO:0006139(nucleobase-containing compound metabolic process);GO:0018130(heterocycle biosynthetic process);GO:0034641(cellular nitrogen compound metabolic proces…	NA
PC-3p-127107_56	XM_016093482.2	392	418	408	-36.6	-24.6	0.672131	12	1-3,418-416;5-15,413-403;16-19,397-394	4-4,415-414[AILt];x-x,402-398[BULt];20-21,393-392[UP3]	..((((.....(((((((((((..(((&)))-.)))))))))))-----))))..	CCUGGUUCCUUUCCGAGGCUCUGAAGA&UCU-AAGAGCCUUGGA-----ACCAUA	1	39.6024	4	0.997687	Output/R0h/cleaveLand_result/t_plot/PC-3p-127107_56_XM_016093482.2_408_TPlot.pdf	0	0	NA	NA	NA	0	0	NA	NA	NA	39.6024	0	0	6.3194e-18	1.52182e-17	yes	GO:0008152(metabolic process);GO:0003954(NADH dehydrogenase activity);GO:0016491(oxidoreductase activity);GO:0003824(catalytic activity);GO:0050136(NADH dehydrogenase (quinone) activity);GO:0008137(NADH dehydrogenase (ubiquinone) activity);GO:0016655(oxidoreductase activity, acting on NAD(P)H, quinone or similar compound as acceptor);GO:0016651(oxidoreductase activity, acting on NAD(P)H);GO:00551…	ko01100(Metabolic pathways);ko00190(Oxidative phosphorylation)
PC-3p-127107_56	XM_016093528.1	799	820	812	-36.6	-24.1	0.65847	10	1-6,820-815;8-10,814-812;11-18,809-802	7-7,x-x[BULq];x-x,811-810[BULt];19-21,801-799[UP3]	...((((((((..(((-((((((&)))))).)))--))))))))...	UGGGGUUCCAACUGGC-CUUGGA&UCUAAGAGCC--UUGGAACCAUA	0	0	NA	NA	NA	1	32.684	4	0.999987	Output/R8h/cleaveLand_result/t_plot/PC-3p-127107_56_XM_016093528.1_812_TPlot.pdf	0	0	NA	NA	NA	0	32.684	0	6.3879e-15	9.59436e-15	yes	GO:0008152(metabolic process);GO:0043167(ion binding);GO:0034308(primary alcohol metabolic process);GO:0005488(binding);GO:0055114(oxidation-reduction process);GO:0016491(oxidoreductase activity);GO:0006067(ethanol metabolic process);GO:0043169(cation binding);GO:0006069(ethanol oxidation);GO:0046872(metal ion binding);GO:0016614(oxidoreductase activity, acting on CH-OH group of donors);GO:000827…	ko01200(Carbon metabolism);ko01110(Biosynthesis of secondary metabolites);ko00350(Tyrosine metabolism);ko00071(Fatty acid degradation);ko00010(Glycolysis / Gluconeogenesis);ko01100(Metabolic pathways)
PC-3p-127107_56	XM_016094771.2	79	100	91	-36.6	-24.2	0.661202	11	6-15,95-86;16-21,84-79	1-5,100-96[UP5];x-x,85-85[BULt]	((((((.((((((((((.....&.....))))))))))-))))))	UAUGGUCUCCAAGGUUCAAAAU&UCUAAGAGCCUUGGA-ACCAUA	1	39.6024	4	0.999889	Output/R0h/cleaveLand_result/t_plot/PC-3p-127107_56_XM_016094771.2_91_TPlot.pdf	0	0	NA	NA	NA	0	0	NA	NA	NA	39.6024	0	0	6.3194e-18	1.52182e-17	yes	NA	NA
PC-3p-127107_56	XM_016098109.2	1269	1289	1280	-36.6	-24.5	0.669399	12.5	6-19,1284-1271	1-5,1289-1285[UP5];20-21,1270-1269[UP3]	..((((((((((((((.....&.....))))))))))))))..	UUUGGUUCUGAGGCUCCGUGG&UCUAAGAGCCUUGGAACCAUA	0	0	NA	NA	NA	0	0	NA	NA	NA	4	129.672	2	0.934423	Output/R24h/cleaveLand_result/t_plot/PC-3p-127107_56_XM_016098109.2_1280_TPlot.pdf	0	0	129.672	4.8042e-57	1.62433e-55	yes	GO:0044424(intracellular part);GO:0005737(cytoplasm);GO:0005622(intracellular);GO:0044464(cell part);GO:0005623(cell)	NA
PC-3p-127107_56	XM_016101201.2	1664	1693	1676	-36.6	-24.6	0.672131	20	1-7,1693-1687;8-12,1678-1674;13-21,1672-1664	x-x,1686-1679[BULt];x-x,1673-1673[BULt]	(((((((((.(((((........(((((((&)))))))--------)))))-)))))))))	UAUGGUUCCUAAGGUGGUUAAGUUCUUGGA&UCUAAGA--------GCCUU-GGAACCAUA	0	0	NA	NA	NA	0	0	NA	NA	NA	2	64.8361	2	0.918945	Output/R24h/cleaveLand_result/t_plot/PC-3p-127107_56_XM_016101201.2_1676_TPlot.pdf	0	0	64.8361	6.941e-29	3.45403e-28	yes	GO:0003824(catalytic activity);GO:0008152(metabolic process)	ko00940(Phenylpropanoid biosynthesis);ko00130(Ubiquinone and other terpenoid-quinone biosynthesis);ko01100(Metabolic pathways);ko01110(Biosynthesis of secondary metabolites);ko00360(Phenylalanine metabolism)
PC-3p-127107_56	XM_016101576.2	698	719	710	-36.6	-24	0.655738	6	1-2,719-718;4-14,716-706;15-19,704-700	3-3,717-717[SIL];x-x,705-705[BULt];20-21,699-698[UP3]	..(((((.(((((((((((.((&)).)))))))))))-)))))..	GUUGGUUGCUAAGGCUCUUCGG&UCUAAGAGCCUUGG-AACCAUA	0	0	NA	NA	NA	2	65.368	2	0.984062	Output/R8h/cleaveLand_result/t_plot/PC-3p-127107_56_XM_016101576.2_710_TPlot.pdf	0	0	NA	NA	NA	0	65.368	0	4.0777e-29	2.60335e-28	yes	GO:1901564(organonitrogen compound metabolic process);GO:0003824(catalytic activity);GO:0016740(transferase activity);GO:0009308(amine metabolic process);GO:0006595(polyamine metabolic process);GO:0044237(cellular metabolic process);GO:0008152(metabolic process);GO:0009987(cellular process);GO:0006576(cellular biogenic amine metabolic process);GO:0034641(cellular nitrogen compound metabolic proce…	ko00330(Arginine and proline metabolism);ko00410(beta-Alanine metabolism);ko00480(Glutathione metabolism);ko00270(Cysteine and methionine metabolism);ko01100(Metabolic pathways)
PC-3p-127107_56	XM_016102252.2	771	792	782	-36.6	-24.1	0.65847	10.5	3-8,790-785;9-14,783-778;17-20,775-772	1-2,792-791[UP5];x-x,784-784[BULt];15-16,777-776[SIL];21-21,771-771[UP3]	.((((..((((((.((((((..&..))))))-))))))..)))).	GGUGGGCCCAGGGCCUCUUGAU&UCUAAGAG-CCUUGGAACCAUA	1	39.6024	4	0.999904	Output/R0h/cleaveLand_result/t_plot/PC-3p-127107_56_XM_016102252.2_782_TPlot.pdf	0	0	NA	NA	NA	0	0	NA	NA	NA	39.6024	0	0	6.3194e-18	1.52182e-17	yes	GO:1900409(positive regulation of cellular response to oxidative stress);GO:1901033(positive regulation of response to reactive oxygen species);GO:0050789(regulation of biological process);GO:1902882(regulation of response to oxidative stress);GO:0044444(cytoplasmic part);GO:0043167(ion binding);GO:0043085(positive regulation of catalytic activity);GO:0005739(mitochondrion);GO:1902884(positive re…	NA
PC-3p-127107_56	XM_016102483.2	248	269	260	-36.6	-24.2	0.661202	8.5	2-12,268-258;13-15,256-254;17-21,252-248	1-1,269-269[UP5];x-x,257-257[BULt];16-16,253-253[SIL]	(((((.(((.(((((((((((.&.)))))))))))-))).)))))	UGUGGGUCCUGGGGUUCUUGGU&UCUAAGAGCCUU-GGAACCAUA	0	0	NA	NA	NA	1	32.684	4	0.999961	Output/R8h/cleaveLand_result/t_plot/PC-3p-127107_56_XM_016102483.2_260_TPlot.pdf	0	0	NA	NA	NA	0	32.684	0	6.3879e-15	9.59436e-15	yes	NA	NA
PC-3p-127107_56	XM_016102639.1	966	991	982	-36.6	-25.5	0.696721	14	1-11,991-981;12-17,976-971;18-19,969-968	x-x,980-977[BULt];x-x,970-970[BULt];20-21,967-966[UP3]	..((.((((((....(((((((((((&)))))))))))----))))))-))..	CUUGUGUUCCGGCGGGGGCUCUUGGA&UCUAAGAGCCU----UGGAAC-CAUA	0	0	NA	NA	NA	3	98.052	2	0.719842	Output/R8h/cleaveLand_result/t_plot/PC-3p-127107_56_XM_016102639.1_982_TPlot.pdf	4	129.672	2	0.723787	Output/R24h/cleaveLand_result/t_plot/PC-3p-127107_56_XM_016102639.1_982_TPlot.pdf	0	98.052	129.672	6.9673e-27	3.41068e-26	yes	NA	ko04016(MAPK signaling pathway - plant);ko04626(Plant-pathogen interaction)
PC-3p-127107_56	XM_016102914.2	1855	1875	1866	-36.6	-26	0.710383	8.5	1-3,1875-1873;6-15,1870-1861;17-20,1859-1856	4-5,1872-1871[SIL];16-16,1860-1860[SIL];21-21,1855-1855[UP3]	.((((.((((((((((..(((&)))..)))))))))).)))).	AGUGGAUCCAAGGCUUGGGGA&UCUAAGAGCCUUGGAACCAUA	0	0	NA	NA	NA	1	32.684	4	0.922036	Output/R8h/cleaveLand_result/t_plot/PC-3p-127107_56_XM_016102914.2_1866_TPlot.pdf	1	32.4181	4	0.928764	Output/R24h/cleaveLand_result/t_plot/PC-3p-127107_56_XM_016102914.2_1866_TPlot.pdf	0	32.684	32.4181	8.5335e-08	8.81903e-08	yes	GO:0006464(cellular protein modification process);GO:0016740(transferase activity);GO:0035639(purine ribonucleoside triphosphate binding);GO:1901564(organonitrogen compound metabolic process);GO:0043412(macromolecule modification);GO:0016020(membrane);GO:0032553(ribonucleotide binding);GO:1901363(heterocyclic compound binding);GO:0008152(metabolic process);GO:0016773(phosphotransferase activity, …	ko04626(Plant-pathogen interaction)
PC-3p-127107_56	XM_016103236.2	670	690	681	-36.6	-24.4	0.666667	15	8-20,683-671	1-7,690-684[UP5];21-21,670-670[UP3]	.(((((((((((((.......&.......))))))))))))).	CAUGGUUCCGAGGCGGAUCCG&UCUAAGAGCCUUGGAACCAUA	1	39.6024	4	0.999338	Output/R0h/cleaveLand_result/t_plot/PC-3p-127107_56_XM_016103236.2_681_TPlot.pdf	2	65.368	3	0.581731	Output/R8h/cleaveLand_result/t_plot/PC-3p-127107_56_XM_016103236.2_681_TPlot.pdf	0	0	NA	NA	NA	39.6024	65.368	0	3.4877e-14	3.94452e-14	yes	NA	NA
PC-3p-127107_56	XM_016104137.2	545	566	556	-36.6	-24.3	0.663934	7	1-7,566-560;9-9,558-558;10-18,556-548	8-8,559-559[SIL];x-x,557-557[BULt];19-21,547-545[UP3]	...(((((((((.(.(((((((&))))))).)-)))))))))...	CAGGGUUCCAAGAGAUCUUAGA&UCUAAGAGC-CUUGGAACCAUA	3	118.807	3	0.462336	Output/R0h/cleaveLand_result/t_plot/PC-3p-127107_56_XM_016104137.2_556_TPlot.pdf	14	457.576	3	0.618487	Output/R8h/cleaveLand_result/t_plot/PC-3p-127107_56_XM_016104137.2_556_TPlot.pdf	10	324.181	3	0.59101	Output/R24h/cleaveLand_result/t_plot/PC-3p-127107_56_XM_016104137.2_556_TPlot.pdf	118.807	457.576	324.181	7.1469e-43	1.12888e-41	yes	GO:0050896(response to stimulus)	NA
PC-3p-127107_56	XM_016104195.2	386	408	397	-36.6	-27.4	0.748634	6	2-3,407-406;4-8,404-400;9-20,398-387	1-1,408-408[UP5];x-x,405-405[BULt];x-x,399-399[BULt];21-21,386-386[UP3]	.((((((((((((.(((((.((.&.))-)))))-)))))))))))).	GAUGGUUCCAAGGCCUCUUCAGC&UCU-AAGAG-CCUUGGAACCAUA	1	39.6024	4	0.655856	Output/R0h/cleaveLand_result/t_plot/PC-3p-127107_56_XM_016104195.2_397_TPlot.pdf	0	0	NA	NA	NA	0	0	NA	NA	NA	39.6024	0	0	6.3194e-18	1.52182e-17	yes	GO:0050896(response to stimulus)	NA
PC-3p-127107_56	XM_016104539.2	328	348	339	-36.6	-23.8	0.650273	14.5	7-20,342-329	1-6,348-343[UP5];21-21,328-328[UP3]	.((((((((((((((......&......)))))))))))))).	AGUGGUUCCAGGGUUAACGCC&UCUAAGAGCCUUGGAACCAUA	1	39.6024	4	0.999993	Output/R0h/cleaveLand_result/t_plot/PC-3p-127107_56_XM_016104539.2_339_TPlot.pdf	0	0	NA	NA	NA	0	0	NA	NA	NA	39.6024	0	0	6.3194e-18	1.52182e-17	yes	GO:0044425(membrane part);GO:0016020(membrane);GO:0016021(integral component of membrane);GO:0031224(intrinsic component of membrane)	NA
PC-3p-127107_56	XM_016107227.2	2192	2213	2203	-36.6	-23.8	0.650273	5.5	1-5,2213-2209;6-8,2207-2205;10-21,2203-2192	x-x,2208-2208[BULt];9-9,2204-2204[SIL]	((((((((((((.(((.(((((&)))))-))).))))))))))))	UAUGGUUUCAAGACUCAUUGGA&UCUAA-GAGCCUUGGAACCAUA	0	0	NA	NA	NA	1	32.684	4	1	Output/R8h/cleaveLand_result/t_plot/PC-3p-127107_56_XM_016107227.2_2203_TPlot.pdf	1	32.4181	4	1	Output/R24h/cleaveLand_result/t_plot/PC-3p-127107_56_XM_016107227.2_2203_TPlot.pdf	0	32.684	32.4181	8.5335e-08	8.81903e-08	yes	GO:0000166(nucleotide binding);GO:0005488(binding);GO:0097159(organic cyclic compound binding);GO:1901363(heterocyclic compound binding);GO:1901265(nucleoside phosphate binding);GO:0043170(macromolecule metabolic process);GO:0008152(metabolic process);GO:0036094(small molecule binding);GO:0006807(nitrogen compound metabolic process);GO:1901564(organonitrogen compound metabolic process);GO:0019538…	NA
PC-3p-127107_56	XM_016107255.2	959	978	969	-36.6	-24.5	0.669399	12	6-11,973-968;13-20,967-960	1-5,978-974[UP5];12-12,x-x[BULq];21-21,959-959[UP3]	.((((((((-((((((.....&.....)))))).)))))))).	CAUGGUUCC-AGGCUCGUCUU&UCUAAGAGCCUUGGAACCAUA	0	0	NA	NA	NA	0	0	NA	NA	NA	1	32.4181	4	0.99975	Output/R24h/cleaveLand_result/t_plot/PC-3p-127107_56_XM_016107255.2_969_TPlot.pdf	0	0	32.4181	8.3342e-15	9.59436e-15	yes	GO:0006793(phosphorus metabolic process);GO:0032555(purine ribonucleotide binding);GO:0016740(transferase activity);GO:0008152(metabolic process);GO:1901363(heterocyclic compound binding);GO:0016310(phosphorylation);GO:0006796(phosphate-containing compound metabolic process);GO:0006468(protein phosphorylation);GO:0035639(purine ribonucleoside triphosphate binding);GO:1901265(nucleoside phosphate …	NA
PC-3p-127107_56	XM_016107834.2	1538	1562	1552	-36.6	-23.9	0.653005	7.5	1-3,1562-1560;4-14,1558-1548;15-20,1544-1539	x-x,1559-1559[BULt];x-x,1547-1545[BULt];21-21,1538-1538[UP3]	.((((((...(((((((((((.(((&)))-)))))))))))---)))))).	GAUGGUUUUGCUGAGGCUCUUGAGA&UCU-AAGAGCCUUGG---AACCAUA	1	39.6024	4	0.999989	Output/R0h/cleaveLand_result/t_plot/PC-3p-127107_56_XM_016107834.2_1552_TPlot.pdf	0	0	NA	NA	NA	0	0	NA	NA	NA	39.6024	0	0	6.3194e-18	1.52182e-17	yes	GO:0030312(external encapsulating structure);GO:0046556(alpha-L-arabinofuranosidase activity);GO:0044424(intracellular part);GO:0071704(organic substance metabolic process);GO:0016020(membrane);GO:0043226(organelle);GO:0016787(hydrolase activity);GO:0016052(carbohydrate catabolic process);GO:0003824(catalytic activity);GO:0044238(primary metabolic process);GO:0000272(polysaccharide catabolic proc…	ko01100(Metabolic pathways);ko00520(Amino sugar and nucleotide sugar metabolism)
PC-3p-127107_56	XM_016111551.2	801	830	820	-36.6	-25.7	0.702186	22.5	1-4,830-827;6-11,824-819;12-21,810-801	5-5,826-825[AILt];x-x,818-811[BULt]	((((((((((........((((((..((((&))))-.))))))--------))))))))))	UGUGGUUCCAGAACCGCAGGGCUCGGUGGA&UCUA-AGAGCCU--------UGGAACCAUA	2	79.2048	3	0.184937	Output/R0h/cleaveLand_result/t_plot/PC-3p-127107_56_XM_016111551.2_820_TPlot.pdf	0	0	NA	NA	NA	0	0	NA	NA	NA	79.2048	0	0	3.9892e-35	3.86508e-34	yes	GO:0097159(organic cyclic compound binding);GO:0003676(nucleic acid binding);GO:1901363(heterocyclic compound binding);GO:0005488(binding);GO:0003677(DNA binding)	NA
PC-3p-127107_56	XM_016114373.2	1813	1837	1827	-36.6	-24	0.655738	10.5	2-5,1836-1833;7-15,1830-1822;16-21,1818-1813	1-1,1837-1837[UP5];6-6,1832-1831[AILt];x-x,1821-1819[BULt]	((((((...(((((((((..((((.&.))))-.)))))))))---))))))	UGUGGUUAAUCCAGGGCUGGUUGGG&UCUAA-GAGCCUUGGA---ACCAUA	3	118.807	2	0.952596	Output/R0h/cleaveLand_result/t_plot/PC-3p-127107_56_XM_016114373.2_1827_TPlot.pdf	1	32.684	4	0.999995	Output/R8h/cleaveLand_result/t_plot/PC-3p-127107_56_XM_016114373.2_1827_TPlot.pdf	0	0	NA	NA	NA	118.807	32.684	0	4.006e-33	3.60477e-32	yes	NA	ko03015(mRNA surveillance pathway)
PC-3p-127107_56	XM_016114429.2	175	196	187	-36.6	-24.3	0.663934	8	1-3,196-194;6-9,192-189;10-10,187-187;11-21,185-175	4-5,193-193[AILq];x-x,188-188[BULt];x-x,186-186[BULt]	(((((((((((.(.((((.-(((&)))..))))-)-)))))))))))	UAUGGUUCCAACGAGCUCG-AGA&UCUAAGAGC-C-UUGGAACCAUA	0	0	NA	NA	NA	0	0	NA	NA	NA	2	64.8361	2	0.964476	Output/R24h/cleaveLand_result/t_plot/PC-3p-127107_56_XM_016114429.2_187_TPlot.pdf	0	0	64.8361	6.941e-29	3.45403e-28	yes	GO:0005524(ATP binding);GO:0032553(ribonucleotide binding);GO:0043167(ion binding);GO:1901265(nucleoside phosphate binding);GO:0000166(nucleotide binding);GO:0043169(cation binding);GO:0003824(catalytic activity);GO:0043168(anion binding);GO:0016787(hydrolase activity);GO:0016020(membrane);GO:0035639(purine ribonucleoside triphosphate binding);GO:0032559(adenyl ribonucleotide binding);GO:0031224(…	NA
PC-3p-127107_56	XM_016116888.2	2437	2460	2448	-36.6	-26.3	0.718579	11	1-3,2460-2458;4-6,2453-2451;8-20,2450-2438	x-x,2457-2454[BULt];7-7,x-x[BULq];21-21,2437-2437[UP3]	.(((((((((((((-(((....(((&)))----))).))))))))))))).	GAUGGUUCCAAGGC-CUUCCCAAGA&UCU----AAGAGCCUUGGAACCAUA	2	79.2048	2	0.435629	Output/R0h/cleaveLand_result/t_plot/PC-3p-127107_56_XM_016116888.2_2448_TPlot.pdf	3	98.052	2	0.537415	Output/R8h/cleaveLand_result/t_plot/PC-3p-127107_56_XM_016116888.2_2448_TPlot.pdf	3	97.2542	2	0.541373	Output/R24h/cleaveLand_result/t_plot/PC-3p-127107_56_XM_016116888.2_2448_TPlot.pdf	79.2048	98.052	97.2542	0.2889	0.291001	yes	NA	NA
PC-3p-127107_56	XM_021125451.1	2050	2071	2062	-36.6	-24.4	0.666667	12	6-13,2066-2059;14-19,2057-2052	1-5,2071-2067[UP5];x-x,2058-2058[BULt];20-21,2051-2050[UP3]	..((((((.((((((((.....&.....))))))))-))))))..	UCUGGUUCACAAGGCUCAUCUA&UCUAAGAGCCUUG-GAACCAUA	1	39.6024	4	0.999274	Output/R0h/cleaveLand_result/t_plot/PC-3p-127107_56_XM_021125451.1_2062_TPlot.pdf	0	0	NA	NA	NA	0	0	NA	NA	NA	39.6024	0	0	6.3194e-18	1.52182e-17	yes	GO:0044425(membrane part);GO:0016020(membrane);GO:0016021(integral component of membrane);GO:0031224(intrinsic component of membrane)	NA
PC-3p-127107_56	XM_021138549.1	180	200	191	-36.6	-23.9	0.653005	8	1-4,200-197;6-14,195-187;17-18,184-183	5-5,196-196[SIL];15-16,186-185[SIL];19-21,182-180[UP3]	...((..(((((((((.((((&)))).)))))))))..))...	GCCGGGACCAAGGCUUCUAGA&UCUAAGAGCCUUGGAACCAUA	0	0	NA	NA	NA	0	0	NA	NA	NA	1	32.4181	4	0.999999	Output/R24h/cleaveLand_result/t_plot/PC-3p-127107_56_XM_021138549.1_191_TPlot.pdf	0	0	32.4181	8.3342e-15	9.59436e-15	yes	GO:0036211(protein modification process);GO:0031418(L-ascorbic acid binding);GO:0043167(ion binding);GO:0016021(integral component of membrane);GO:0071704(organic substance metabolic process);GO:0003824(catalytic activity);GO:0043170(macromolecule metabolic process);GO:0006807(nitrogen compound metabolic process);GO:0016705(oxidoreductase activity, acting on paired donors, with incorporation or r…	ko01100(Metabolic pathways);ko00330(Arginine and proline metabolism)
PC-3p-127107_56	XM_021139693.1	1856	1876	1867	-36.6	-26	0.710383	8.5	1-3,1876-1874;6-15,1871-1862;17-20,1860-1857	4-5,1873-1872[SIL];16-16,1861-1861[SIL];21-21,1856-1856[UP3]	.((((.((((((((((..(((&)))..)))))))))).)))).	AGUGGAUCCAAGGCUUGGGGA&UCUAAGAGCCUUGGAACCAUA	0	0	NA	NA	NA	1	32.684	4	0.923747	Output/R8h/cleaveLand_result/t_plot/PC-3p-127107_56_XM_021139693.1_1867_TPlot.pdf	1	32.4181	4	0.930381	Output/R24h/cleaveLand_result/t_plot/PC-3p-127107_56_XM_021139693.1_1867_TPlot.pdf	0	32.684	32.4181	8.5335e-08	8.81903e-08	yes	GO:0006464(cellular protein modification process);GO:0016740(transferase activity);GO:0035639(purine ribonucleoside triphosphate binding);GO:1901564(organonitrogen compound metabolic process);GO:0043412(macromolecule modification);GO:0016020(membrane);GO:0032553(ribonucleotide binding);GO:1901363(heterocyclic compound binding);GO:0008152(metabolic process);GO:0016773(phosphotransferase activity, …	ko04626(Plant-pathogen interaction)
PC-3p-127107_56	XM_021140420.1	689	712	701	-36.6	-24.98	0.682514	12	1-4,712-709;7-10,704-701;11-20,699-690	5-6,708-705[AILt];x-x,700-700[BULt];21-21,689-689[UP3]	.((((((((((.((((....((((&))))--..))))-)))))))))).	GAUGGUUCCAAGGGCUGAGGUGGA&UCUA--AGAGCC-UUGGAACCAUA	0	0	NA	NA	NA	0	0	NA	NA	NA	1	32.4181	4	0.997333	Output/R24h/cleaveLand_result/t_plot/PC-3p-127107_56_XM_021140420.1_701_TPlot.pdf	0	0	32.4181	8.3342e-15	9.59436e-15	yes	NA	NA
PC-3p-127107_56	XM_021143610.1	731	751	743	-36.6	-23.9	0.653005	5.5	1-4,751-748;6-15,747-738;16-21,736-731	5-5,x-x[BULq];x-x,737-737[BULt]	((((((.((((((((((-((((&)))).))))))))))-))))))	UAUGGUGUUCAAGGUUC-UGGA&UCUAAGAGCCUUGGA-ACCAUA	0	0	NA	NA	NA	0	0	NA	NA	NA	1	32.4181	4	0.999999	Output/R24h/cleaveLand_result/t_plot/PC-3p-127107_56_XM_021143610.1_743_TPlot.pdf	0	0	32.4181	8.3342e-15	9.59436e-15	yes	GO:0043226(organelle);GO:1901360(organic cyclic compound metabolic process);GO:0043170(macromolecule metabolic process);GO:0036094(small molecule binding);GO:0097159(organic cyclic compound binding);GO:0005488(binding);GO:0050794(regulation of cellular process);GO:0016070(RNA metabolic process);GO:0044238(primary metabolic process);GO:1901363(heterocyclic compound binding);GO:0044260(cellular mac…	NA
PC-3p-12725_949	BGI_novel_T002425	1025	1045	1036	-39.4	-28	0.71066	9	4-9,1042-1037;11-21,1035-1025	1-3,1045-1043[UP5];10-10,1036-1036[SIL]	(((((((((((.((((((...&...)))))).)))))))))))	GAGGGAUCGAGACGGCGGUGC&UUCCCGUCGACUUGAUCUCUC	1	39.6024	4	0.529539	Output/R0h/cleaveLand_result/t_plot/PC-3p-12725_949_BGI_novel_T002425_1036_TPlot.pdf	0	0	NA	NA	NA	0	0	NA	NA	NA	39.6024	0	0	6.3194e-18	1.52182e-17	yes	NA	NA
PC-3p-12725_949	BGI_novel_T003024	1029	1050	1042	-39.4	-29.3	0.743655	6	1-9,1050-1042;11-18,1041-1034;19-21,1031-1029	10-10,x-x[BULq];x-x,1033-1032[BULt]	(((..((((((((-(((((((((&))))))))).))))))))--)))	GAGGUGGAUCAAG-CGGCGGGAG&UUCCCGUCGACUUGAUCU--CUC	0	0	NA	NA	NA	1	32.684	4	0.28309	Output/R8h/cleaveLand_result/t_plot/PC-3p-12725_949_BGI_novel_T003024_1042_TPlot.pdf	0	0	NA	NA	NA	0	32.684	0	6.3879e-15	9.59436e-15	yes	GO:0097159(organic cyclic compound binding);GO:0003676(nucleic acid binding);GO:0003723(RNA binding);GO:0005488(binding);GO:0036094(small molecule binding);GO:1901363(heterocyclic compound binding);GO:0000166(nucleotide binding);GO:1901265(nucleoside phosphate binding)	ko03040(Spliceosome)
PC-3p-12725_949	BGI_novel_T011978	542	563	553	-39.4	-26.1	0.662437	8	1-4,563-560;6-8,557-555;11-21,552-542	5-5,559-558[AILt];9-10,554-553[SIL]	(((((((((((..(((..((((&))))-.)))..)))))))))))	GAGAGAUCAAGAAGACUUGGAA&UUCC-CGUCGACUUGAUCUCUC	1	39.6024	4	0.99789	Output/R0h/cleaveLand_result/t_plot/PC-3p-12725_949_BGI_novel_T011978_553_TPlot.pdf	0	0	NA	NA	NA	0	0	NA	NA	NA	39.6024	0	0	6.3194e-18	1.52182e-17	yes	NA	ko00052(Galactose metabolism)
PC-3p-12725_949	BGI_novel_T011980	450	471	461	-39.4	-26.1	0.662437	8	1-4,471-468;6-8,465-463;11-21,460-450	5-5,467-466[AILt];9-10,462-461[SIL]	(((((((((((..(((..((((&))))-.)))..)))))))))))	GAGAGAUCAAGAAGACUUGGAA&UUCC-CGUCGACUUGAUCUCUC	0	0	NA	NA	NA	1	32.684	4	0.999557	Output/R8h/cleaveLand_result/t_plot/PC-3p-12725_949_BGI_novel_T011980_461_TPlot.pdf	0	0	NA	NA	NA	0	32.684	0	6.3879e-15	9.59436e-15	yes	NA	ko00052(Galactose metabolism)
PC-3p-12725_949	BGI_novel_T013847	750	779	770	-39.4	-27.2	0.690355	22.5	1-5,779-775;7-12,773-768;13-21,758-750	6-6,774-774[SIL];x-x,767-759[BULt]	(((((((((.........((((((.(((((&))))).))))))---------)))))))))	GGGAGAUCACACCAUCAUGGUCGGAGGGAA&UUCCCGUCGACU---------UGAUCUCUC	0	0	NA	NA	NA	0	0	NA	NA	NA	1	32.4181	4	0.927108	Output/R24h/cleaveLand_result/t_plot/PC-3p-12725_949_BGI_novel_T013847_770_TPlot.pdf	0	0	32.4181	8.3342e-15	9.59436e-15	yes	GO:0003824(catalytic activity);GO:0044260(cellular macromolecule metabolic process);GO:0043169(cation binding);GO:0043170(macromolecule metabolic process);GO:0009056(catabolic process);GO:0032446(protein modification by small protein conjugation);GO:0008152(metabolic process);GO:0036211(protein modification process);GO:0071704(organic substance metabolic process);GO:0051603(proteolysis involved i…	NA
PC-3p-12725_949	XM_016078066.2	984	1004	995	-39.4	-26.2	0.664975	8	2-4,1003-1001;5-8,999-996;10-21,995-984	1-1,1004-1004[UP5];x-x,1000-1000[BULt];9-9,x-x[BULq]	((((((((((((-((((.(((.&.)))-)))).))))))))))))	GAGGGGUCAGGU-GAUGAGGAC&UUCC-CGUCGACUUGAUCUCUC	1	39.6024	4	0.996952	Output/R0h/cleaveLand_result/t_plot/PC-3p-12725_949_XM_016078066.2_995_TPlot.pdf	2	65.368	3	0.498353	Output/R8h/cleaveLand_result/t_plot/PC-3p-12725_949_XM_016078066.2_995_TPlot.pdf	0	0	NA	NA	NA	39.6024	65.368	0	3.4877e-14	3.94452e-14	yes	GO:0043168(anion binding);GO:0046872(metal ion binding);GO:0044434(chloroplast part);GO:0097367(carbohydrate derivative binding);GO:0009408(response to heat);GO:0043227(membrane-bounded organelle);GO:0009628(response to abiotic stimulus);GO:0031975(envelope);GO:0005488(binding);GO:0017076(purine nucleotide binding);GO:0005515(protein binding);GO:0031072(heat shock protein binding);GO:0005524(ATP …	NA
PC-3p-12725_949	XM_016086021.2	183	203	194	-39.4	-29.6	0.751269	5	1-10,203-194;12-19,192-185	11-11,193-193[SIL];20-21,184-183[UP3]	..((((((((.((((((((((&)))))))))).))))))))..	ACGGGAUCGACUCGACGGGAA&UUCCCGUCGACUUGAUCUCUC	0	0	NA	NA	NA	0	0	NA	NA	NA	2	64.8361	2	0.0658454	Output/R24h/cleaveLand_result/t_plot/PC-3p-12725_949_XM_016086021.2_194_TPlot.pdf	0	0	64.8361	6.941e-29	3.45403e-28	yes	GO:0015630(microtubule cytoskeleton);GO:0005856(cytoskeleton);GO:0019001(guanyl nucleotide binding);GO:0099080(supramolecular complex);GO:0043226(organelle);GO:0007017(microtubule-based process);GO:0036094(small molecule binding);GO:0043228(non-membrane-bounded organelle);GO:0032555(purine ribonucleotide binding);GO:0016817(hydrolase activity, acting on acid anhydrides);GO:0044430(cytoskeletal pa…	ko04145(Phagosome)
PC-3p-12725_949	XM_016096771.2	1252	1273	1264	-39.4	-27.9	0.708122	6	1-13,1273-1261;15-17,1259-1257;18-21,1255-1252	14-14,1260-1260[SIL];x-x,1256-1256[BULt]	((((.(((.(((((((((((((&))))))))))))).)))-))))	GGGAUGAUGGGGUUGAUGGGAA&UUCCCGUCGACUUGAUC-UCUC	0	0	NA	NA	NA	3	98.052	2	0.327457	Output/R8h/cleaveLand_result/t_plot/PC-3p-12725_949_XM_016096771.2_1264_TPlot.pdf	0	0	NA	NA	NA	0	98.052	0	2.6011e-43	4.90923e-42	yes	GO:0044260(cellular macromolecule metabolic process);GO:0006470(protein dephosphorylation);GO:1901564(organonitrogen compound metabolic process);GO:0006807(nitrogen compound metabolic process);GO:0008152(metabolic process);GO:0006796(phosphate-containing compound metabolic process);GO:0016787(hydrolase activity);GO:0009987(cellular process);GO:0044237(cellular metabolic process);GO:0044238(primar…	NA
PC-3p-12725_949	XM_016100475.2	589	610	601	-39.4	-27.6	0.700508	7.5	1-8,610-603;10-12,601-599;13-20,597-590	9-9,602-602[SIL];x-x,598-598[BULt];21-21,589-589[UP3]	.((((((((.(((.((((((((&)))))))).)))-)))))))).	UAGAGGUCACAGUGGAUGGGGA&UUCCCGUCGACU-UGAUCUCUC	0	0	NA	NA	NA	1	32.684	4	0.86119	Output/R8h/cleaveLand_result/t_plot/PC-3p-12725_949_XM_016100475.2_601_TPlot.pdf	0	0	NA	NA	NA	0	32.684	0	6.3879e-15	9.59436e-15	yes	GO:0044042(glucan metabolic process);GO:0008270(zinc ion binding);GO:0016740(transferase activity);GO:0033692(cellular polysaccharide biosynthetic process);GO:0071554(cell wall organization or biogenesis);GO:0043170(macromolecule metabolic process);GO:0000271(polysaccharide biosynthetic process);GO:0046914(transition metal ion binding);GO:0044464(cell part);GO:0031224(intrinsic component of membr…	NA
PC-3p-12725_949	XM_016100476.1	137	158	149	-39.4	-27.6	0.700508	7.5	1-8,158-151;10-12,149-147;13-20,145-138	9-9,150-150[SIL];x-x,146-146[BULt];21-21,137-137[UP3]	.((((((((.(((.((((((((&)))))))).)))-)))))))).	UAGAGGUCACAGUGGAUGGGGA&UUCCCGUCGACU-UGAUCUCUC	2	79.2048	2	0.393375	Output/R0h/cleaveLand_result/t_plot/PC-3p-12725_949_XM_016100476.1_149_TPlot.pdf	2	65.368	2	0.490142	Output/R8h/cleaveLand_result/t_plot/PC-3p-12725_949_XM_016100476.1_149_TPlot.pdf	0	0	NA	NA	NA	79.2048	65.368	0	7.4316e-17	1.77155e-16	yes	GO:0044042(glucan metabolic process);GO:0008270(zinc ion binding);GO:0016740(transferase activity);GO:0033692(cellular polysaccharide biosynthetic process);GO:0071554(cell wall organization or biogenesis);GO:0043170(macromolecule metabolic process);GO:0000271(polysaccharide biosynthetic process);GO:0046914(transition metal ion binding);GO:0044464(cell part);GO:0031224(intrinsic component of membr…	NA
PC-3p-12725_949	XM_016101277.2	410	430	421	-39.4	-32.6	0.827411	3	1-3,430-428;5-21,426-410	4-4,427-427[SIL]	(((((((((((((((((.(((&))).)))))))))))))))))	GGGAGAUCAAGUCGACGAGAG&UUCCCGUCGACUUGAUCUCUC	0	0	NA	NA	NA	1	32.684	4	0.0219427	Output/R8h/cleaveLand_result/t_plot/PC-3p-12725_949_XM_016101277.2_421_TPlot.pdf	0	0	NA	NA	NA	0	32.684	0	6.3879e-15	9.59436e-15	yes	GO:0008233(peptidase activity);GO:0008236(serine-type peptidase activity);GO:0070011(peptidase activity, acting on L-amino acid peptides);GO:0044238(primary metabolic process);GO:0004175(endopeptidase activity);GO:0016787(hydrolase activity);GO:1901564(organonitrogen compound metabolic process);GO:0004252(serine-type endopeptidase activity);GO:0071704(organic substance metabolic process);GO:00038…	ko00330(Arginine and proline metabolism)
PC-3p-12725_949	XM_016102010.2	667	688	679	-39.4	-27.9	0.708122	6.5	1-10,688-679;11-11,677-677;13-19,675-669	x-x,678-678[BULt];12-12,676-676[SIL];20-21,668-667[UP3]	..(((((((.(.((((((((((&))))))))))-).)))))))..	UCGGGAUCACGUUCGACGGGAA&UUCCCGUCGA-CUUGAUCUCUC	0	0	NA	NA	NA	1	32.684	4	0.729919	Output/R8h/cleaveLand_result/t_plot/PC-3p-12725_949_XM_016102010.2_679_TPlot.pdf	4	129.672	2	0.360149	Output/R24h/cleaveLand_result/t_plot/PC-3p-12725_949_XM_016102010.2_679_TPlot.pdf	0	32.684	129.672	3.1518e-37	4.41136e-36	yes	NA	ko00500(Starch and sucrose metabolism);ko00940(Phenylpropanoid biosynthesis);ko00460(Cyanoamino acid metabolism);ko01100(Metabolic pathways);ko01110(Biosynthesis of secondary metabolites);ko04626(Plant-pathogen interaction);ko04016(MAPK signaling pathway - plant)
PC-3p-12725_949	XM_016102124.2	332	353	344	-39.4	-26	0.659898	7	1-3,353-351;4-9,349-344;11-15,343-339;17-21,336-332	x-x,350-350[BULt];10-10,x-x[BULq];16-16,338-337[AILt]	(((((..(((((-((((((.(((&)))-)))))).)))))-.)))))	GAGAGUCUCAAG-CGGCGGAGAA&UUC-CCGUCGACUUGA-UCUCUC	1	39.6024	4	0.998892	Output/R0h/cleaveLand_result/t_plot/PC-3p-12725_949_XM_016102124.2_344_TPlot.pdf	0	0	NA	NA	NA	1	32.4181	4	0.999796	Output/R24h/cleaveLand_result/t_plot/PC-3p-12725_949_XM_016102124.2_344_TPlot.pdf	39.6024	0	32.4181	8.8481e-09	9.41666e-09	yes	NA	NA
PC-3p-12725_949	XM_016103754.2	815	835	826	-39.4	-26.8	0.680203	5.5	1-10,835-826;12-19,825-818;20-21,816-815	11-11,x-x[BULq];x-x,817-817[BULt]	((.((((((((-((((((((((&)))))))))).))))))))-))	GAUGAGGUCGA-UUGACGGGAG&UUCCCGUCGACUUGAUCUC-UC	2	79.2048	2	0.674331	Output/R0h/cleaveLand_result/t_plot/PC-3p-12725_949_XM_016103754.2_826_TPlot.pdf	0	0	NA	NA	NA	1	32.4181	4	0.990345	Output/R24h/cleaveLand_result/t_plot/PC-3p-12725_949_XM_016103754.2_826_TPlot.pdf	79.2048	0	32.4181	3.1075e-19	1.30585e-18	yes	NA	NA
PC-3p-12725_949	XM_016104814.2	1706	1728	1718	-39.4	-26.9	0.682741	8.5	1-3,1728-1726;4-10,1724-1718;11-19,1716-1708	x-x,1725-1725[BULt];x-x,1717-1717[BULt];20-21,1707-1706[UP3]	..(((((((((.(((((((.(((&)))-)))))))-)))))))))..	CUGGGGUCGAGUUCGACGGCGGA&UUC-CCGUCGA-CUUGAUCUCUC	1	39.6024	4	0.965459	Output/R0h/cleaveLand_result/t_plot/PC-3p-12725_949_XM_016104814.2_1718_TPlot.pdf	0	0	NA	NA	NA	0	0	NA	NA	NA	39.6024	0	0	6.3194e-18	1.52182e-17	yes	GO:0010252(auxin homeostasis);GO:0048878(chemical homeostasis);GO:0060918(auxin transport);GO:0005886(plasma membrane);GO:0065007(biological regulation);GO:0048583(regulation of response to stimulus);GO:0031224(intrinsic component of membrane);GO:0022857(transmembrane transporter activity);GO:0044444(cytoplasmic part);GO:0005215(transporter activity);GO:0051179(localization);GO:0050794(regulation…	NA
PC-3p-12725_949	XM_016104862.2	399	421	410	-39.4	-27.4	0.695431	9.5	1-4,421-418;6-21,414-399	5-5,417-415[AILt]	((((((((((((((((...((((&))))--.))))))))))))))))	GGGAGGUCGGGUUGACACAGGAA&UUCC--CGUCGACUUGAUCUCUC	0	0	NA	NA	NA	0	0	NA	NA	NA	1	32.4181	4	0.908284	Output/R24h/cleaveLand_result/t_plot/PC-3p-12725_949_XM_016104862.2_410_TPlot.pdf	0	0	32.4181	8.3342e-15	9.59436e-15	yes	NA	NA
PC-3p-12725_949	XM_016104966.2	105	126	116	-39.4	-26.2	0.664975	11	2-8,125-119;11-13,115-113;16-21,110-105	1-1,126-126[UP5];9-10,118-116[AILt];14-15,112-111[SIL]	((((((..(((...(((((((.&.)))))))-..)))..))))))	GAGAGGGAGAGGGAGGCGGGAG&UUCCCGUC-GACUUGAUCUCUC	1	39.6024	4	0.995347	Output/R0h/cleaveLand_result/t_plot/PC-3p-12725_949_XM_016104966.2_116_TPlot.pdf	0	0	NA	NA	NA	0	0	NA	NA	NA	39.6024	0	0	6.3194e-18	1.52182e-17	yes	GO:1901990(regulation of mitotic cell cycle phase transition);GO:0065007(biological regulation);GO:0050794(regulation of cellular process);GO:0043231(intracellular membrane-bounded organelle);GO:0051128(regulation of cellular component organization);GO:0044464(cell part);GO:0043229(intracellular organelle);GO:0044424(intracellular part);GO:0051783(regulation of nuclear division);GO:0043226(organe…	NA
PC-3p-12725_949	XM_016108390.2	1230	1248	1241	-39.4	-27.1	0.687817	8.5	3-6,1246-1243;8-9,1242-1241;11-21,1240-1230	1-2,1248-1247[UP5];7-7,x-x[BULq];10-10,x-x[BULq]	(((((((((((-((-((((..&..)))).)).)))))))))))	GAGAGGUCAGG-CG-CGGGCA&UUCCCGUCGACUUGAUCUCUC	0	0	NA	NA	NA	4	130.736	2	0.624875	Output/R8h/cleaveLand_result/t_plot/PC-3p-12725_949_XM_016108390.2_1241_TPlot.pdf	1	32.4181	4	0.950674	Output/R24h/cleaveLand_result/t_plot/PC-3p-12725_949_XM_016108390.2_1241_TPlot.pdf	0	130.736	32.4181	9.6762e-38	1.39181e-36	yes	GO:0048471(perinuclear region of cytoplasm);GO:0009816(defense response to bacterium, incompatible interaction);GO:0031348(negative regulation of defense response);GO:0065007(biological regulation);GO:0043227(membrane-bounded organelle);GO:0009605(response to external stimulus);GO:0043207(response to external biotic stimulus);GO:0045087(innate immune response);GO:0048519(negative regulation of bi…	ko00514(Other types of O-glycan biosynthesis)
PC-3p-12725_949	XM_016112267.2	1112	1134	1124	-39.4	-26.6	0.675127	7	2-3,1133-1132;4-6,1130-1128;8-15,1126-1119;16-21,1117-1112	1-1,1134-1134[UP5];x-x,1131-1131[BULt];7-7,1127-1127[SIL];x-x,1118-1118[BULt]	((((((.((((((((.(((.((.&.))-))).))))))))-))))))	GAGAGACUCAAGUUGUCGGAGAU&UUC-CCGUCGACUUGA-UCUCUC	1	39.6024	4	0.991463	Output/R0h/cleaveLand_result/t_plot/PC-3p-12725_949_XM_016112267.2_1124_TPlot.pdf	1	32.684	4	0.996806	Output/R8h/cleaveLand_result/t_plot/PC-3p-12725_949_XM_016112267.2_1124_TPlot.pdf	0	0	NA	NA	NA	39.6024	32.684	0	8.6245e-09	9.35023e-09	yes	GO:0003824(catalytic activity);GO:0005488(binding);GO:0050662(coenzyme binding);GO:0048037(cofactor binding)	ko00040(Pentose and glucuronate interconversions);ko04120(Ubiquitin mediated proteolysis);ko01100(Metabolic pathways)
PC-3p-12725_949	XM_016112522.2	463	484	474	-39.4	-28.3	0.718274	5.5	1-8,484-477;9-13,475-471;16-21,468-463	x-x,476-476[BULt];14-15,470-469[SIL]	((((((..(((((.((((((((&))))))))-)))))..))))))	GAGAGGAGAAGUCAGGCGGGAA&UUCCCGUC-GACUUGAUCUCUC	2	79.2048	2	0.158163	Output/R0h/cleaveLand_result/t_plot/PC-3p-12725_949_XM_016112522.2_474_TPlot.pdf	0	0	NA	NA	NA	2	64.8361	2	0.209123	Output/R24h/cleaveLand_result/t_plot/PC-3p-12725_949_XM_016112522.2_474_TPlot.pdf	79.2048	0	64.8361	7.822e-17	1.85572e-16	yes	GO:0019222(regulation of metabolic process);GO:0031323(regulation of cellular metabolic process);GO:0043226(organelle);GO:0044464(cell part);GO:0060255(regulation of macromolecule metabolic process);GO:0003677(DNA binding);GO:0043231(intracellular membrane-bounded organelle);GO:0003676(nucleic acid binding);GO:0005488(binding);GO:2000112(regulation of cellular macromolecule biosynthetic process);…	ko04016(MAPK signaling pathway - plant)
PC-3p-12725_949	XM_016112605.2	1789	1810	1801	-39.4	-29	0.736041	5.5	1-8,1810-1803;10-14,1801-1797;16-21,1794-1789	9-9,1802-1802[SIL];15-15,1796-1795[AILt]	((((((..(((((.((((((((&)))))))).)))))-.))))))	GAGAGACCCAAGUGGAUGGGAG&UUCCCGUCGACUUG-AUCUCUC	0	0	NA	NA	NA	1	32.684	4	0.329255	Output/R8h/cleaveLand_result/t_plot/PC-3p-12725_949_XM_016112605.2_1801_TPlot.pdf	0	0	NA	NA	NA	0	32.684	0	6.3879e-15	9.59436e-15	yes	GO:0043229(intracellular organelle);GO:0009987(cellular process);GO:0009056(catabolic process);GO:0044424(intracellular part);GO:0043231(intracellular membrane-bounded organelle);GO:0044237(cellular metabolic process);GO:0043226(organelle);GO:0044248(cellular catabolic process);GO:0006914(autophagy);GO:0005622(intracellular);GO:0005623(cell);GO:0044464(cell part);GO:0061919(process utilizing auto…	NA
PC-3p-12725_949	XM_016114539.2	781	802	792	-39.4	-25.9	0.65736	7.5	1-3,802-800;4-16,798-786;18-20,784-782	x-x,799-799[BULt];17-17,785-785[SIL];21-21,781-781[UP3]	.(((.(((((((((((((.(((&)))-))))))))))))).))).	UGGAAGUCGGGUCGGCGGUGAA&UUC-CCGUCGACUUGAUCUCUC	1	39.6024	4	0.999287	Output/R0h/cleaveLand_result/t_plot/PC-3p-12725_949_XM_016114539.2_792_TPlot.pdf	0	0	NA	NA	NA	1	32.4181	4	0.999883	Output/R24h/cleaveLand_result/t_plot/PC-3p-12725_949_XM_016114539.2_792_TPlot.pdf	39.6024	0	32.4181	8.8481e-09	9.41666e-09	yes	GO:0003824(catalytic activity);GO:0008152(metabolic process);GO:0055114(oxidation-reduction process);GO:0016491(oxidoreductase activity)	ko01100(Metabolic pathways);ko00740(Riboflavin metabolism);ko01110(Biosynthesis of secondary metabolites)
PC-3p-12725_949	XM_016115111.2	1024	1046	1037	-39.4	-25.7	0.652284	8.5	1-11,1046-1036;14-18,1032-1028;19-20,1026-1025	12-13,1035-1033[AILt];x-x,1027-1027[BULt];21-21,1024-1024[UP3]	.((.(((((...(((((((((((&)))))))))))-..)))))-)).	CGGAAGAUCCUCGUCGGCGGGAA&UUCCCGUCGAC-UUGAUCU-CUC	0	0	NA	NA	NA	0	0	NA	NA	NA	1	32.4181	4	0.999967	Output/R24h/cleaveLand_result/t_plot/PC-3p-12725_949_XM_016115111.2_1037_TPlot.pdf	0	0	32.4181	8.3342e-15	9.59436e-15	yes	GO:0006508(proteolysis);GO:0043170(macromolecule metabolic process);GO:0070011(peptidase activity, acting on L-amino acid peptides);GO:1901565(organonitrogen compound catabolic process);GO:0030163(protein catabolic process);GO:1901564(organonitrogen compound metabolic process);GO:0044238(primary metabolic process);GO:0006807(nitrogen compound metabolic process);GO:0008152(metabolic process);GO:00…	ko03010(Ribosome)
PC-3p-12725_949	XM_016116059.2	957	981	969	-39.4	-26.94	0.683756	10.5	1-9,981-973;11-15,968-964;16-21,962-957	10-10,972-969[AILt];x-x,963-963[BULt]	((((((.(((((....(((((((((&)))))))))---.)))))-))))))	GAGGGGCUCGAGAACGCGACGGGAA&UUCCCGUCG---ACUUGA-UCUCUC	3	118.807	2	0.629957	Output/R0h/cleaveLand_result/t_plot/PC-3p-12725_949_XM_016116059.2_969_TPlot.pdf	2	65.368	3	0.324306	Output/R8h/cleaveLand_result/t_plot/PC-3p-12725_949_XM_016116059.2_969_TPlot.pdf	0	0	NA	NA	NA	118.807	65.368	0	8.9414e-26	4.32609e-25	yes	GO:1901575(organic substance catabolic process);GO:0016787(hydrolase activity);GO:0071555(cell wall organization);GO:0016021(integral component of membrane);GO:0000272(polysaccharide catabolic process);GO:0010393(galacturonan metabolic process);GO:0045490(pectin catabolic process);GO:0016020(membrane);GO:0050790(regulation of catalytic activity);GO:0042545(cell wall modification);GO:0005976(polys…	ko00040(Pentose and glucuronate interconversions);ko01100(Metabolic pathways)
PC-3p-12725_949	XM_016117149.2	1434	1455	1445	-39.4	-25.8	0.654822	8	1-3,1455-1453;4-9,1451-1446;11-20,1444-1435	x-x,1452-1452[BULt];10-10,1445-1445[SIL];21-21,1434-1434[UP3]	.((((((((((.((((((.(((&)))-)))))).)))))))))).	CGGAGAUUAGGGCGGCGGUGAA&UUC-CCGUCGACUUGAUCUCUC	0	0	NA	NA	NA	4	130.736	2	0.959378	Output/R8h/cleaveLand_result/t_plot/PC-3p-12725_949_XM_016117149.2_1445_TPlot.pdf	0	0	NA	NA	NA	0	130.736	0	1.658e-57	6.39043e-56	yes	GO:0034357(photosynthetic membrane);GO:0031967(organelle envelope);GO:0071704(organic substance metabolic process);GO:0044281(small molecule metabolic process);GO:0005506(iron ion binding);GO:0044464(cell part);GO:0044283(small molecule biosynthetic process);GO:0046394(carboxylic acid biosynthetic process);GO:1901576(organic substance biosynthetic process);GO:0005622(intracellular);GO:0008152(met…	ko01100(Metabolic pathways);ko01110(Biosynthesis of secondary metabolites);ko00592(alpha-Linolenic acid metabolism)
PC-3p-12725_949	XM_021124859.1	892	915	904	-39.4	-25.8	0.654822	7	2-3,914-913;4-8,911-907;9-16,905-898;17-21,896-892	1-1,915-915[UP5];x-x,912-912[BULt];x-x,906-906[BULt];x-x,897-897[BULt]	(((((.((((((((.(((((.((.&.))-)))))-))))))))-)))))	GAGAGCAUUGAGUCAGACGGAGAU&UUC-CCGUC-GACUUGAU-CUCUC	0	0	NA	NA	NA	1	32.684	4	0.999888	Output/R8h/cleaveLand_result/t_plot/PC-3p-12725_949_XM_021124859.1_904_TPlot.pdf	0	0	NA	NA	NA	0	32.684	0	6.3879e-15	9.59436e-15	yes	NA	NA
PC-3p-12725_949	XM_021134825.1	629	650	641	-39.4	-26	0.659898	9.5	2-11,649-640;14-19,636-631	1-1,650-650[UP5];12-13,639-637[AILt];20-21,630-629[UP3]	..((((((...((((((((((.&.))))))))))-..))))))..	CCGGGAUCCAUGUCGAUGGGAU&UUCCCGUCGAC-UUGAUCUCUC	2	79.2048	2	0.865331	Output/R0h/cleaveLand_result/t_plot/PC-3p-12725_949_XM_021134825.1_641_TPlot.pdf	0	0	NA	NA	NA	0	0	NA	NA	NA	79.2048	0	0	3.9892e-35	3.86508e-34	yes	GO:0032787(monocarboxylic acid metabolic process);GO:0044422(organelle part);GO:0008152(metabolic process);GO:0006090(pyruvate metabolic process);GO:0009532(plastid stroma);GO:0043226(organelle);GO:0044237(cellular metabolic process);GO:0006732(coenzyme metabolic process);GO:0006082(organic acid metabolic process);GO:0009526(plastid envelope);GO:0055114(oxidation-reduction process);GO:0035384(thi…	ko00010(Glycolysis / Gluconeogenesis);ko01110(Biosynthesis of secondary metabolites);ko00620(Pyruvate metabolism);ko00020(Citrate cycle (TCA cycle));ko01100(Metabolic pathways);ko01200(Carbon metabolism)
PC-3p-12725_949	XM_021135928.1	1134	1154	1145	-39.4	-28	0.71066	9	4-9,1151-1146;11-21,1144-1134	1-3,1154-1152[UP5];10-10,1145-1145[SIL]	(((((((((((.((((((...&...)))))).)))))))))))	GAGGGAUCGAGACGGCGGUGC&UUCCCGUCGACUUGAUCUCUC	1	39.6024	4	0.608573	Output/R0h/cleaveLand_result/t_plot/PC-3p-12725_949_XM_021135928.1_1145_TPlot.pdf	0	0	NA	NA	NA	0	0	NA	NA	NA	39.6024	0	0	6.3194e-18	1.52182e-17	yes	NA	NA
PC-3p-12911_938	BGI_novel_T001351	1396	1406	1397	-28.7	-19.4	0.675958	3	12-21,1405-1396	11-11,1406-1406[SIL]	((((((((((.&.))))))))))	GCUGAGCUGCG&UUUUUAAUUAA	1	39.6024	4	0.999998	Output/R0h/cleaveLand_result/t_plot/PC-3p-12911_938_BGI_novel_T001351_1397_TPlot.pdf	0	0	NA	NA	NA	0	0	NA	NA	NA	39.6024	0	0	6.3194e-18	1.52182e-17	yes	NA	ko04070(Phosphatidylinositol signaling system);ko01100(Metabolic pathways);ko01110(Biosynthesis of secondary metabolites);ko00564(Glycerophospholipid metabolism);ko00561(Glycerolipid metabolism)
PC-3p-12911_938	BGI_novel_T002206	1008	1028	1019	-28.7	-18.9	0.658537	17.5	9-21,1020-1008	1-8,1028-1021[UP5]	(((((((((((((........&........)))))))))))))	GUUGGGCUGCUUGCUCCGGAU&UUUUUAAUUAAGUAGCUCAGC	0	0	NA	NA	NA	1	32.684	4	1	Output/R8h/cleaveLand_result/t_plot/PC-3p-12911_938_BGI_novel_T002206_1019_TPlot.pdf	0	0	NA	NA	NA	0	32.684	0	6.3879e-15	9.59436e-15	yes	GO:0019438(aromatic compound biosynthetic process);GO:1901137(carbohydrate derivative biosynthetic process);GO:0009265(2'-deoxyribonucleotide biosynthetic process);GO:0044249(cellular biosynthetic process);GO:0009211(pyrimidine deoxyribonucleoside triphosphate metabolic process);GO:0009139(pyrimidine nucleoside diphosphate biosynthetic process);GO:0097159(organic cyclic compound binding);GO:00181…	ko00240(Pyrimidine metabolism);ko01100(Metabolic pathways)
PC-3p-12911_938	BGI_novel_T002252	1249	1269	1260	-28.7	-19.6	0.682927	7.5	2-12,1268-1258;14-21,1256-1249	1-1,1269-1269[UP5];13-13,1257-1257[SIL]	((((((((.(((((((((((.&.))))))))))).))))))))	GUUGAGCUUUUUAGUUGGAGC&UUUUUAAUUAAGUAGCUCAGC	0	0	NA	NA	NA	1	32.684	4	0.999994	Output/R8h/cleaveLand_result/t_plot/PC-3p-12911_938_BGI_novel_T002252_1260_TPlot.pdf	0	0	NA	NA	NA	0	32.684	0	6.3879e-15	9.59436e-15	yes	GO:0097159(organic cyclic compound binding);GO:1901265(nucleoside phosphate binding);GO:0005488(binding);GO:0000166(nucleotide binding);GO:1901363(heterocyclic compound binding);GO:0036094(small molecule binding)	ko03040(Spliceosome);ko04144(Endocytosis);ko04141(Protein processing in endoplasmic reticulum)
PC-3p-12911_938	BGI_novel_T004127	1589	1610	1600	-28.7	-18.7	0.651568	13	2-9,1609-1602;14-21,1596-1589	1-1,1610-1610[UP5];10-13,1601-1597[AILt]	((((((((.....((((((((.&.))))))))-....))))))))	GCUGAGCUUGGAGAGUUGAAGC&UUUUUAAUU-AAGUAGCUCAGC	0	0	NA	NA	NA	1	32.684	4	1	Output/R8h/cleaveLand_result/t_plot/PC-3p-12911_938_BGI_novel_T004127_1600_TPlot.pdf	1	32.4181	4	1	Output/R24h/cleaveLand_result/t_plot/PC-3p-12911_938_BGI_novel_T004127_1600_TPlot.pdf	0	32.684	32.4181	8.5335e-08	8.81903e-08	yes	GO:0003723(RNA binding);GO:0097159(organic cyclic compound binding);GO:0003676(nucleic acid binding);GO:1901265(nucleoside phosphate binding);GO:0000166(nucleotide binding);GO:0005488(binding);GO:0036094(small molecule binding);GO:1901363(heterocyclic compound binding)	ko03013(RNA transport);ko03040(Spliceosome);ko03015(mRNA surveillance pathway)
PC-3p-12911_938	BGI_novel_T004463	1169	1195	1186	-28.7	-19.2	0.66899	13.5	1-10,1195-1186;11-17,1181-1175;18-21,1172-1169	x-x,1185-1182[BULt];x-x,1174-1173[BULt]	((((..(((((((....((((((((((&))))))))))----)))))))--))))	GCUGCAAGCUGCUGUCCUAGUUAGAGA&UUUUUAAUUA----AGUAGCU--CAGC	0	0	NA	NA	NA	0	0	NA	NA	NA	1	32.4181	4	1	Output/R24h/cleaveLand_result/t_plot/PC-3p-12911_938_BGI_novel_T004463_1186_TPlot.pdf	0	0	32.4181	8.3342e-15	9.59436e-15	yes	GO:0015031(protein transport);GO:0051641(cellular localization);GO:0006614(SRP-dependent cotranslational protein targeting to membrane);GO:0034613(cellular protein localization);GO:0046907(intracellular transport);GO:0044424(intracellular part);GO:0045047(protein targeting to ER);GO:0071702(organic substance transport);GO:0005622(intracellular);GO:0072599(establishment of protein localization to …	ko03060(Protein export)
PC-3p-12911_938	BGI_novel_T006280	815	835	826	-28.7	-18.8	0.655052	15.5	8-16,828-820;18-21,818-815	1-7,835-829[UP5];17-17,819-819[SIL]	((((.(((((((((.......&.......))))))))).))))	GCUGUGCUGCUUGACAACGAA&UUUUUAAUUAAGUAGCUCAGC	0	0	NA	NA	NA	0	0	NA	NA	NA	1	32.4181	4	1	Output/R24h/cleaveLand_result/t_plot/PC-3p-12911_938_BGI_novel_T006280_826_TPlot.pdf	0	0	32.4181	8.3342e-15	9.59436e-15	yes	GO:0043168(anion binding);GO:0003824(catalytic activity);GO:0032549(ribonucleoside binding);GO:0043232(intracellular non-membrane-bounded organelle);GO:0005198(structural molecule activity);GO:0016818(hydrolase activity, acting on acid anhydrides, in phosphorus-containing anhydrides);GO:0044424(intracellular part);GO:1901265(nucleoside phosphate binding);GO:0032553(ribonucleotide binding);GO:0044…	ko04145(Phagosome)
PC-3p-12911_938	BGI_novel_T006663	949	960	951	-28.7	-19.5	0.679443	4	11-21,959-949	10-10,960-960[SIL]	(((((((((((.&.)))))))))))	GCUGGGCUGCUC&UUUUUAAUUAAG	0	0	NA	NA	NA	1	32.684	4	0.999998	Output/R8h/cleaveLand_result/t_plot/PC-3p-12911_938_BGI_novel_T006663_951_TPlot.pdf	0	0	NA	NA	NA	0	32.684	0	6.3879e-15	9.59436e-15	yes	GO:0031365(N-terminal protein amino acid modification);GO:0004596(peptide alpha-N-acetyltransferase activity);GO:0043543(protein acylation);GO:0044424(intracellular part);GO:0031248(protein acetyltransferase complex);GO:0006464(cellular protein modification process);GO:0003824(catalytic activity);GO:0032991(macromolecular complex);GO:0016410(N-acyltransferase activity);GO:0016407(acetyltransferas…	NA
PC-3p-12911_938	BGI_novel_T007390	1160	1180	1171	-28.7	-19.5	0.679443	6.5	1-6,1180-1175;8-9,1173-1172;11-21,1170-1160	7-7,1174-1174[SIL];10-10,1171-1171[SIL]	(((((((((((.((.((((((&)))))).)).)))))))))))	GCUGAGUUACUCAAAUGGAAA&UUUUUAAUUAAGUAGCUCAGC	1	39.6024	4	0.999986	Output/R0h/cleaveLand_result/t_plot/PC-3p-12911_938_BGI_novel_T007390_1171_TPlot.pdf	0	0	NA	NA	NA	0	0	NA	NA	NA	39.6024	0	0	6.3194e-18	1.52182e-17	yes	GO:0005622(intracellular);GO:0007154(cell communication);GO:0044464(cell part);GO:0051345(positive regulation of hydrolase activity);GO:0043085(positive regulation of catalytic activity);GO:0050896(response to stimulus);GO:0065007(biological regulation);GO:0050794(regulation of cellular process);GO:0005623(cell);GO:0007264(small GTPase mediated signal transduction);GO:0065009(regulation of molecu…	NA
PC-3p-12911_938	BGI_novel_T007391	1120	1140	1131	-28.7	-19.5	0.679443	6.5	1-6,1140-1135;8-9,1133-1132;11-21,1130-1120	7-7,1134-1134[SIL];10-10,1131-1131[SIL]	(((((((((((.((.((((((&)))))).)).)))))))))))	GCUGAGUUACUCAAAUGGAAA&UUUUUAAUUAAGUAGCUCAGC	1	39.6024	4	0.99999	Output/R0h/cleaveLand_result/t_plot/PC-3p-12911_938_BGI_novel_T007391_1131_TPlot.pdf	0	0	NA	NA	NA	0	0	NA	NA	NA	39.6024	0	0	6.3194e-18	1.52182e-17	yes	GO:0005622(intracellular);GO:0007154(cell communication);GO:0044464(cell part);GO:0051345(positive regulation of hydrolase activity);GO:0043085(positive regulation of catalytic activity);GO:0050896(response to stimulus);GO:0065007(biological regulation);GO:0050794(regulation of cellular process);GO:0005623(cell);GO:0007264(small GTPase mediated signal transduction);GO:0065009(regulation of molecu…	NA
PC-3p-12911_938	BGI_novel_T007598	601	621	612	-28.7	-18.94	0.65993	15	1-6,621-616;12-21,610-601	7-11,615-611[SIL]	((((((((((.....((((((&)))))).....))))))))))	GCUGAGCUAUGUCAGUGGGGA&UUUUUAAUUAAGUAGCUCAGC	0	0	NA	NA	NA	1	32.684	4	1	Output/R8h/cleaveLand_result/t_plot/PC-3p-12911_938_BGI_novel_T007598_612_TPlot.pdf	0	0	NA	NA	NA	0	32.684	0	6.3879e-15	9.59436e-15	yes	GO:0044085(cellular component biogenesis);GO:0071704(organic substance metabolic process);GO:0019538(protein metabolic process);GO:0010556(regulation of macromolecule biosynthetic process);GO:0097159(organic cyclic compound binding);GO:0043170(macromolecule metabolic process);GO:0044260(cellular macromolecule metabolic process);GO:0034645(cellular macromolecule biosynthetic process);GO:0044237(ce…	ko03013(RNA transport)
PC-3p-12911_938	BGI_novel_T008262	1688	1708	1699	-28.7	-19.7	0.686411	10	5-18,1704-1691	1-4,1708-1705[UP5];19-21,1690-1688[UP3]	...((((((((((((((....&....))))))))))))))...	UUCGAGCUACUUAAUUAUUGA&UUUUUAAUUAAGUAGCUCAGC	0	0	NA	NA	NA	1	32.684	4	0.999986	Output/R8h/cleaveLand_result/t_plot/PC-3p-12911_938_BGI_novel_T008262_1699_TPlot.pdf	0	0	NA	NA	NA	0	32.684	0	6.3879e-15	9.59436e-15	yes	GO:0035639(purine ribonucleoside triphosphate binding);GO:0016462(pyrophosphatase activity);GO:0016818(hydrolase activity, acting on acid anhydrides, in phosphorus-containing anhydrides);GO:0005515(protein binding);GO:0097367(carbohydrate derivative binding);GO:0032555(purine ribonucleotide binding);GO:0016787(hydrolase activity);GO:0032559(adenyl ribonucleotide binding);GO:0006928(movement of ce…	ko00260(Glycine, serine and threonine metabolism);ko01100(Metabolic pathways)
PC-3p-12911_938	BGI_novel_T010483	1402	1424	1414	-28.7	-18.7	0.651568	8.5	2-9,1423-1416;11-12,1413-1412;13-21,1410-1402	1-1,1424-1424[UP5];10-10,1415-1414[AILt];x-x,1411-1411[BULt]	(((((((((.((..((((((((.&.))))))))-.))-)))))))))	GCUGAGUUAUCUGAAGUUAAAAG&UUUUUAAUU-AAG-UAGCUCAGC	0	0	NA	NA	NA	0	0	NA	NA	NA	1	32.4181	4	1	Output/R24h/cleaveLand_result/t_plot/PC-3p-12911_938_BGI_novel_T010483_1414_TPlot.pdf	0	0	32.4181	8.3342e-15	9.59436e-15	yes	GO:0071704(organic substance metabolic process);GO:1901564(organonitrogen compound metabolic process);GO:0044237(cellular metabolic process);GO:0003824(catalytic activity);GO:0019538(protein metabolic process);GO:0009987(cellular process);GO:0044267(cellular protein metabolic process);GO:0042578(phosphoric ester hydrolase activity);GO:0006470(protein dephosphorylation);GO:0006464(cellular protein…	NA
PC-3p-12911_938	BGI_novel_T011351	702	727	718	-28.7	-20.3	0.707317	7	1-12,727-716;13-17,714-710;18-21,705-702	x-x,715-715[BULt];x-x,709-706[BULt]	((((....(((((.((((((((((((&))))))))))))-)))))----))))	GCUGGAACAGCUAUCUUAAUUAAGAA&UUUUUAAUUAAG-UAGCU----CAGC	1	39.6024	4	0.996658	Output/R0h/cleaveLand_result/t_plot/PC-3p-12911_938_BGI_novel_T011351_718_TPlot.pdf	0	0	NA	NA	NA	0	0	NA	NA	NA	39.6024	0	0	6.3194e-18	1.52182e-17	yes	GO:0005737(cytoplasm);GO:0043229(intracellular organelle);GO:0016020(membrane);GO:0005777(peroxisome);GO:0006996(organelle organization);GO:0044464(cell part);GO:0043231(intracellular membrane-bounded organelle);GO:0016043(cellular component organization);GO:0071840(cellular component organization or biogenesis);GO:0043226(organelle);GO:0005623(cell);GO:0044444(cytoplasmic part);GO:0044424(intrac…	ko04146(Peroxisome)
PC-3p-12911_938	BGI_novel_T012313	1060	1079	1071	-28.7	-19.8	0.689895	9	1-7,1079-1073;10-21,1071-1060	8-9,1072-1072[AILq]	((((((((((((.-(((((((&)))))))..))))))))))))	GCUGAGUUGCUUC-UUGGGGA&UUUUUAAUUAAGUAGCUCAGC	0	0	NA	NA	NA	2	65.368	2	0.959681	Output/R8h/cleaveLand_result/t_plot/PC-3p-12911_938_BGI_novel_T012313_1071_TPlot.pdf	0	0	NA	NA	NA	0	65.368	0	4.0777e-29	2.60335e-28	yes	GO:0005694(chromosome);GO:0000280(nuclear division);GO:0000228(nuclear chromosome);GO:0051321(meiotic cell cycle);GO:0031981(nuclear lumen);GO:0070013(intracellular organelle lumen);GO:0005623(cell);GO:0031974(membrane-enclosed lumen);GO:0009987(cellular process);GO:0044424(intracellular part);GO:0043227(membrane-bounded organelle);GO:0030983(mismatched DNA binding);GO:0022402(cell cycle process)…	ko03430(Mismatch repair)
PC-3p-12911_938	BGI_novel_T012479	841	864	855	-28.7	-19.9	0.69338	9	3-16,862-849;17-21,845-841	1-2,864-863[UP5];x-x,848-846[BULt]	(((((...((((((((((((((..&..))))))))))))))---)))))	GCUGAUCGGUUGCUUAAUUGGAUC&UUUUUAAUUAAGUAGC---UCAGC	1	39.6024	4	0.999418	Output/R0h/cleaveLand_result/t_plot/PC-3p-12911_938_BGI_novel_T012479_855_TPlot.pdf	0	0	NA	NA	NA	0	0	NA	NA	NA	39.6024	0	0	6.3194e-18	1.52182e-17	yes	GO:0050794(regulation of cellular process);GO:0016972(thiol oxidase activity);GO:0065008(regulation of biological quality);GO:0042592(homeostatic process);GO:0055114(oxidation-reduction process);GO:0031224(intrinsic component of membrane);GO:0016020(membrane);GO:0016021(integral component of membrane);GO:0009987(cellular process);GO:0065007(biological regulation);GO:0050789(regulation of biologic…	NA
PC-3p-12911_938	XM_016076656.2	820	840	831	-28.7	-20.2	0.703833	7	2-5,839-836;8-13,833-828;15-21,826-820	1-1,840-840[UP5];6-7,835-834[SIL];14-14,827-827[SIL]	(((((((.((((((..((((.&.))))..)))))).)))))))	GCUGAGCAACUUAAGAAGAAG&UUUUUAAUUAAGUAGCUCAGC	2	79.2048	2	0.838242	Output/R0h/cleaveLand_result/t_plot/PC-3p-12911_938_XM_016076656.2_831_TPlot.pdf	0	0	NA	NA	NA	0	0	NA	NA	NA	79.2048	0	0	3.9892e-35	3.86508e-34	yes	GO:0046872(metal ion binding);GO:0051234(establishment of localization);GO:0006811(ion transport);GO:0005488(binding);GO:0030001(metal ion transport);GO:0051179(localization);GO:0006810(transport);GO:0043169(cation binding);GO:0043167(ion binding);GO:0006812(cation transport)	NA
PC-3p-12911_938	XM_016079084.2	753	775	765	-28.7	-20.1	0.700348	11.5	1-8,775-768;11-16,764-759;17-21,757-753	9-10,767-765[AILt];x-x,758-758[BULt]	(((((.((((((...((((((((&))))))))-..))))))-)))))	GCUGGUGCUACUGCUGUUGAGGA&UUUUUAAU-UAAGUAGC-UCAGC	1	39.6024	4	0.998716	Output/R0h/cleaveLand_result/t_plot/PC-3p-12911_938_XM_016079084.2_765_TPlot.pdf	0	0	NA	NA	NA	0	0	NA	NA	NA	39.6024	0	0	6.3194e-18	1.52182e-17	yes	GO:0016684(oxidoreductase activity, acting on peroxide as acceptor);GO:0003824(catalytic activity);GO:1901363(heterocyclic compound binding);GO:0016491(oxidoreductase activity);GO:0042221(response to chemical);GO:0009636(response to toxic substance);GO:1990748(cellular detoxification);GO:0098754(detoxification);GO:0004601(peroxidase activity);GO:0050896(response to stimulus);GO:0046906(tetrapyrro…	ko00053(Ascorbate and aldarate metabolism);ko00480(Glutathione metabolism)
PC-3p-12911_938	XM_016079933.2	608	629	620	-28.7	-18.9	0.658537	8	2-18,628-612;19-21,610-608	1-1,629-629[UP5];x-x,611-611[BULt]	(((.(((((((((((((((((.&.)))))))))))))))))-)))	GUUGGGGUUGCUUGGUUAAGGG&UUUUUAAUUAAGUAGCUC-AGC	1	39.6024	4	1	Output/R0h/cleaveLand_result/t_plot/PC-3p-12911_938_XM_016079933.2_620_TPlot.pdf	0	0	NA	NA	NA	0	0	NA	NA	NA	39.6024	0	0	6.3194e-18	1.52182e-17	yes	GO:0003676(nucleic acid binding);GO:0005488(binding);GO:0097159(organic cyclic compound binding);GO:1901363(heterocyclic compound binding);GO:0003723(RNA binding)	NA
PC-3p-12911_938	XM_016081194.2	3907	3928	3918	-28.7	-21.9	0.763066	9	3-8,3926-3921;10-21,3918-3907	1-2,3928-3927[UP5];9-9,3920-3919[AILt]	((((((((((((..((((((..&..))))))-.))))))))))))	GCUGGGCUGCUUCCAUUAGAUU&UUUUUAAU-UAAGUAGCUCAGC	1	39.6024	4	0.444852	Output/R0h/cleaveLand_result/t_plot/PC-3p-12911_938_XM_016081194.2_3918_TPlot.pdf	0	0	NA	NA	NA	0	0	NA	NA	NA	39.6024	0	0	6.3194e-18	1.52182e-17	yes	GO:0006189('de novo' IMP biosynthetic process);GO:0006753(nucleoside phosphate metabolic process);GO:0016879(ligase activity, forming carbon-nitrogen bonds);GO:0009167(purine ribonucleoside monophosphate metabolic process);GO:0009161(ribonucleoside monophosphate metabolic process);GO:1901137(carbohydrate derivative biosynthetic process);GO:0006793(phosphorus metabolic process);GO:0009126(purine n…	ko01110(Biosynthesis of secondary metabolites);ko01100(Metabolic pathways);ko00230(Purine metabolism)
PC-3p-12911_938	XM_016082824.2	714	739	730	-28.7	-20.3	0.707317	7	1-12,739-728;13-17,726-722;18-21,717-714	x-x,727-727[BULt];x-x,721-718[BULt]	((((....(((((.((((((((((((&))))))))))))-)))))----))))	GCUGGAACAGCUAUCUUAAUUAAGAA&UUUUUAAUUAAG-UAGCU----CAGC	1	39.6024	4	0.995833	Output/R0h/cleaveLand_result/t_plot/PC-3p-12911_938_XM_016082824.2_730_TPlot.pdf	0	0	NA	NA	NA	0	0	NA	NA	NA	39.6024	0	0	6.3194e-18	1.52182e-17	yes	GO:0005737(cytoplasm);GO:0043229(intracellular organelle);GO:0016020(membrane);GO:0005777(peroxisome);GO:0006996(organelle organization);GO:0044464(cell part);GO:0043231(intracellular membrane-bounded organelle);GO:0016043(cellular component organization);GO:0071840(cellular component organization or biogenesis);GO:0043226(organelle);GO:0005623(cell);GO:0044444(cytoplasmic part);GO:0044424(intrac…	ko04146(Peroxisome)
PC-3p-12911_938	XM_016083411.2	2109	2119	2110	-28.7	-19.3	0.672474	2	12-21,2118-2109	11-11,2119-2119[SIL]	((((((((((.&.))))))))))	GCUGAGCUACA&UUUUUAAUUAA	1	39.6024	4	0.999999	Output/R0h/cleaveLand_result/t_plot/PC-3p-12911_938_XM_016083411.2_2110_TPlot.pdf	0	0	NA	NA	NA	1	32.4181	4	1	Output/R24h/cleaveLand_result/t_plot/PC-3p-12911_938_XM_016083411.2_2110_TPlot.pdf	39.6024	0	32.4181	8.8481e-09	9.41666e-09	yes	GO:0043933(macromolecular complex subunit organization);GO:0071840(cellular component organization or biogenesis);GO:0005819(spindle);GO:0005737(cytoplasm);GO:0097435(supramolecular fiber organization);GO:0007010(cytoskeleton organization);GO:0099081(supramolecular polymer);GO:0065003(macromolecular complex assembly);GO:0000922(spindle pole);GO:0044430(cytoskeletal part);GO:0005815(microtubule or…	NA
PC-3p-12911_938	XM_016084585.2	997	1019	1009	-28.7	-20.4	0.710801	8.5	2-9,1018-1011;11-17,1008-1002;18-21,1000-997	1-1,1019-1019[UP5];10-10,1010-1009[AILt];x-x,1001-1001[BULt]	((((.(((((((..((((((((.&.))))))))-.)))))))-))))	GCUGCAGCUGCUGCAAUUAGGAU&UUUUUAAUU-AAGUAGCU-CAGC	0	0	NA	NA	NA	0	0	NA	NA	NA	3	97.2542	2	0.864392	Output/R24h/cleaveLand_result/t_plot/PC-3p-12911_938_XM_016084585.2_1009_TPlot.pdf	0	0	97.2542	5.7766e-43	9.1307e-42	yes	GO:0004124(cysteine synthase activity);GO:1901564(organonitrogen compound metabolic process);GO:0006535(cysteine biosynthetic process from serine);GO:0044272(sulfur compound biosynthetic process);GO:0019752(carboxylic acid metabolic process);GO:0006807(nitrogen compound metabolic process);GO:0016829(lyase activity);GO:0044283(small molecule biosynthetic process);GO:0044281(small molecule metaboli…	ko00270(Cysteine and methionine metabolism);ko01200(Carbon metabolism);ko01110(Biosynthesis of secondary metabolites);ko01100(Metabolic pathways);ko01230(Biosynthesis of amino acids);ko00920(Sulfur metabolism)
PC-3p-12911_938	XM_016084586.2	1019	1041	1031	-28.7	-20.4	0.710801	8.5	2-9,1040-1033;11-17,1030-1024;18-21,1022-1019	1-1,1041-1041[UP5];10-10,1032-1031[AILt];x-x,1023-1023[BULt]	((((.(((((((..((((((((.&.))))))))-.)))))))-))))	GCUGCAGCUGCUGCAAUUAGGAU&UUUUUAAUU-AAGUAGCU-CAGC	0	0	NA	NA	NA	0	0	NA	NA	NA	1	32.4181	4	0.997831	Output/R24h/cleaveLand_result/t_plot/PC-3p-12911_938_XM_016084586.2_1031_TPlot.pdf	0	0	32.4181	8.3342e-15	9.59436e-15	yes	GO:0004124(cysteine synthase activity);GO:1901564(organonitrogen compound metabolic process);GO:0006535(cysteine biosynthetic process from serine);GO:0044272(sulfur compound biosynthetic process);GO:0019752(carboxylic acid metabolic process);GO:0006807(nitrogen compound metabolic process);GO:0016829(lyase activity);GO:0044283(small molecule biosynthetic process);GO:0044281(small molecule metaboli…	ko00270(Cysteine and methionine metabolism);ko01200(Carbon metabolism);ko01110(Biosynthesis of secondary metabolites);ko01100(Metabolic pathways);ko01230(Biosynthesis of amino acids);ko00920(Sulfur metabolism)
PC-3p-12911_938	XM_016085137.2	551	571	562	-28.7	-18.7	0.651568	13.5	7-19,565-553	1-6,571-566[UP5];20-21,552-551[UP3]	..(((((((((((((......&......)))))))))))))..	UGUGAGCUGCUUAAUGAAGUA&UUUUUAAUUAAGUAGCUCAGC	0	0	NA	NA	NA	1	32.684	4	1	Output/R8h/cleaveLand_result/t_plot/PC-3p-12911_938_XM_016085137.2_562_TPlot.pdf	0	0	NA	NA	NA	0	32.684	0	6.3879e-15	9.59436e-15	yes	GO:0044281(small molecule metabolic process);GO:0046174(polyol catabolic process);GO:0005737(cytoplasm);GO:0016491(oxidoreductase activity);GO:0044424(intracellular part);GO:0005622(intracellular);GO:0044248(cellular catabolic process);GO:0046164(alcohol catabolic process);GO:0044237(cellular metabolic process);GO:0044464(cell part);GO:0046872(metal ion binding);GO:0006066(alcohol metabolic proce…	ko00562(Inositol phosphate metabolism);ko00053(Ascorbate and aldarate metabolism)
PC-3p-12911_938	XM_016085812.2	1084	1103	1095	-28.7	-22	0.766551	9	1-8,1103-1096;12-21,1093-1084	9-11,1095-1094[AILq]	((((((((((..-((((((((&))))))))...))))))))))	GCUGAGCUACCU-AUUGAGGA&UUUUUAAUUAAGUAGCUCAGC	0	0	NA	NA	NA	0	0	NA	NA	NA	1	32.4181	4	0.486334	Output/R24h/cleaveLand_result/t_plot/PC-3p-12911_938_XM_016085812.2_1095_TPlot.pdf	0	0	32.4181	8.3342e-15	9.59436e-15	yes	GO:0009126(purine nucleoside monophosphate metabolic process);GO:1901564(organonitrogen compound metabolic process);GO:0044281(small molecule metabolic process);GO:0006725(cellular aromatic compound metabolic process);GO:0006796(phosphate-containing compound metabolic process);GO:0006091(generation of precursor metabolites and energy);GO:0000287(magnesium ion binding);GO:0006753(nucleoside phosph…	ko01100(Metabolic pathways);ko00620(Pyruvate metabolism);ko00010(Glycolysis / Gluconeogenesis);ko01200(Carbon metabolism);ko01230(Biosynthesis of amino acids);ko00230(Purine metabolism);ko01110(Biosynthesis of secondary metabolites)
PC-3p-12911_938	XM_016086230.2	841	864	855	-28.7	-19.9	0.69338	9	3-16,862-849;17-21,845-841	1-2,864-863[UP5];x-x,848-846[BULt]	(((((...((((((((((((((..&..))))))))))))))---)))))	GCUGAUCGGUUGCUUAAUUGGAUC&UUUUUAAUUAAGUAGC---UCAGC	1	39.6024	4	0.999362	Output/R0h/cleaveLand_result/t_plot/PC-3p-12911_938_XM_016086230.2_855_TPlot.pdf	0	0	NA	NA	NA	0	0	NA	NA	NA	39.6024	0	0	6.3194e-18	1.52182e-17	yes	GO:0050794(regulation of cellular process);GO:0016972(thiol oxidase activity);GO:0065008(regulation of biological quality);GO:0042592(homeostatic process);GO:0055114(oxidation-reduction process);GO:0031224(intrinsic component of membrane);GO:0016020(membrane);GO:0016021(integral component of membrane);GO:0009987(cellular process);GO:0065007(biological regulation);GO:0050789(regulation of biologic…	NA
PC-3p-12911_938	XM_016086461.2	3691	3712	3702	-28.7	-18.9	0.658537	10.5	1-6,3712-3707;9-21,3703-3691	7-8,3706-3704[AILt]	(((((((((((((...((((((&))))))-..)))))))))))))	GUUGAGCUAUUUAUUGUGAGGA&UUUUUA-AUUAAGUAGCUCAGC	1	39.6024	4	1	Output/R0h/cleaveLand_result/t_plot/PC-3p-12911_938_XM_016086461.2_3702_TPlot.pdf	0	0	NA	NA	NA	0	0	NA	NA	NA	39.6024	0	0	6.3194e-18	1.52182e-17	yes	GO:0071704(organic substance metabolic process);GO:0044389(ubiquitin-like protein ligase binding);GO:0019538(protein metabolic process);GO:0005622(intracellular);GO:0003824(catalytic activity);GO:0016740(transferase activity);GO:0044424(intracellular part);GO:0036211(protein modification process);GO:0019899(enzyme binding);GO:0031625(ubiquitin protein ligase binding);GO:0070647(protein modificati…	ko04120(Ubiquitin mediated proteolysis)
PC-3p-12911_938	XM_016086511.1	815	837	828	-28.7	-21.3	0.74216	10	4-16,834-822;17-21,819-815	1-3,837-835[UP5];x-x,821-820[BULt]	(((((..(((((((((((((...&...)))))))))))))--)))))	GCUGAUAGCUACUUGGUUAGCUC&UUUUUAAUUAAGUAGC--UCAGC	3	118.807	3	0.0875919	Output/R0h/cleaveLand_result/t_plot/PC-3p-12911_938_XM_016086511.1_828_TPlot.pdf	5	163.42	2	0.385229	Output/R8h/cleaveLand_result/t_plot/PC-3p-12911_938_XM_016086511.1_828_TPlot.pdf	6	194.508	2	0.388554	Output/R24h/cleaveLand_result/t_plot/PC-3p-12911_938_XM_016086511.1_828_TPlot.pdf	118.807	163.42	194.508	0.00011024	0.000112539	yes	GO:0043167(ion binding);GO:0008270(zinc ion binding);GO:0052747(sinapyl alcohol dehydrogenase activity);GO:0008152(metabolic process);GO:0016616(oxidoreductase activity, acting on the CH-OH group of donors, NAD or NADP as acceptor);GO:0043169(cation binding);GO:0016614(oxidoreductase activity, acting on CH-OH group of donors);GO:0046914(transition metal ion binding);GO:0016491(oxidoreductase acti…	ko01100(Metabolic pathways);ko00940(Phenylpropanoid biosynthesis);ko01110(Biosynthesis of secondary metabolites)
PC-3p-12911_938	XM_016086958.2	559	579	570	-28.7	-19.7	0.686411	17	9-21,571-559	1-8,579-572[UP5]	(((((((((((((........&........)))))))))))))	GUUGAGCUGCUUGUGGACCAA&UUUUUAAUUAAGUAGCUCAGC	0	0	NA	NA	NA	1	32.684	4	0.99999	Output/R8h/cleaveLand_result/t_plot/PC-3p-12911_938_XM_016086958.2_570_TPlot.pdf	0	0	NA	NA	NA	0	32.684	0	6.3879e-15	9.59436e-15	yes	GO:0070085(glycosylation);GO:0006807(nitrogen compound metabolic process);GO:0043412(macromolecule modification);GO:0005623(cell);GO:0044446(intracellular organelle part);GO:0016020(membrane);GO:0016758(transferase activity, transferring hexosyl groups);GO:0032580(Golgi cisterna membrane);GO:1901566(organonitrogen compound biosynthetic process);GO:0044422(organelle part);GO:0043231(intracellular …	ko01100(Metabolic pathways)
PC-3p-12911_938	XM_016087626.2	497	518	509	-28.7	-20.2	0.703833	8.5	1-5,518-514;7-18,512-501;20-21,498-497	6-6,513-513[SIL];19-19,500-499[AILt]	((..((((((((((((.(((((&))))).))))))))))))-.))	GCCGGAGCUGCUUGAUGAGGGA&UUUUUAAUUAAGUAGCUC-AGC	0	0	NA	NA	NA	0	0	NA	NA	NA	1	32.4181	4	0.999401	Output/R24h/cleaveLand_result/t_plot/PC-3p-12911_938_XM_016087626.2_509_TPlot.pdf	0	0	32.4181	8.3342e-15	9.59436e-15	yes	NA	NA
PC-3p-12911_938	XM_016088695.2	1039	1059	1050	-28.7	-19.6	0.682927	16.5	9-21,1051-1039	1-8,1059-1052[UP5]	(((((((((((((........&........)))))))))))))	GCUGAGUUACUUGCAGAUGAG&UUUUUAAUUAAGUAGCUCAGC	2	79.2048	2	0.953894	Output/R0h/cleaveLand_result/t_plot/PC-3p-12911_938_XM_016088695.2_1050_TPlot.pdf	0	0	NA	NA	NA	0	0	NA	NA	NA	79.2048	0	0	3.9892e-35	3.86508e-34	yes	GO:0032301(MutSalpha complex);GO:0043234(protein complex);GO:1990391(DNA repair complex);GO:0006139(nucleobase-containing compound metabolic process);GO:0007127(meiosis I);GO:0005694(chromosome);GO:0006310(DNA recombination);GO:0019219(regulation of nucleobase-containing compound metabolic process);GO:0043228(non-membrane-bounded organelle);GO:0006725(cellular aromatic compound metabolic process)…	ko03430(Mismatch repair)
PC-3p-12911_938	XM_016090522.2	2043	2064	2055	-28.7	-21.9	0.763066	7	1-3,2064-2062;6-19,2059-2046;20-21,2044-2043	4-5,2061-2060[SIL];x-x,2045-2045[BULt]	((.((((((((((((((..(((&)))..))))))))))))))-))	GCUUGAGCUACUUGAUUUUGAA&UUUUUAAUUAAGUAGCUCA-GC	0	0	NA	NA	NA	1	32.684	4	0.559973	Output/R8h/cleaveLand_result/t_plot/PC-3p-12911_938_XM_016090522.2_2055_TPlot.pdf	0	0	NA	NA	NA	0	32.684	0	6.3879e-15	9.59436e-15	yes	GO:0055114(oxidation-reduction process);GO:0044464(cell part);GO:0043231(intracellular membrane-bounded organelle);GO:0043227(membrane-bounded organelle);GO:0016628(oxidoreductase activity, acting on the CH-CH group of donors, NAD or NADP as acceptor);GO:0008152(metabolic process);GO:0005488(binding);GO:0043229(intracellular organelle);GO:0003677(DNA binding);GO:0003824(catalytic activity);GO:009…	NA
PC-3p-12911_938	XM_016095046.2	1310	1329	1320	-28.7	-20.4	0.710801	6	1-12,1329-1318;15-21,1316-1310	13-14,1317-1317[AILq]	(((((((.-((((((((((((&))))))))))))..)))))))	GCUGAGCC-UUUGAUUGAAGA&UUUUUAAUUAAGUAGCUCAGC	3	118.807	2	0.775522	Output/R0h/cleaveLand_result/t_plot/PC-3p-12911_938_XM_016095046.2_1320_TPlot.pdf	0	0	NA	NA	NA	0	0	NA	NA	NA	118.807	0	0	2.5157e-52	6.74078e-51	yes	GO:0008168(methyltransferase activity);GO:0003824(catalytic activity);GO:0016741(transferase activity, transferring one-carbon groups);GO:0008152(metabolic process);GO:0016740(transferase activity);GO:0032259(methylation);GO:0016021(integral component of membrane);GO:0044425(membrane part);GO:0031224(intrinsic component of membrane);GO:0016020(membrane)	NA
PC-3p-12911_938	XM_016096014.2	978	1002	993	-28.7	-19.3	0.672474	11	1-6,1002-997;9-16,994-987;17-21,982-978	7-8,996-995[SIL];x-x,986-983[BULt]	(((((....((((((((..((((((&))))))..))))))))----)))))	GCUGGUAUUGCUGCUUAUGUGAAGA&UUUUUAAUUAAGUAGC----UCAGC	0	0	NA	NA	NA	0	0	NA	NA	NA	1	32.4181	4	1	Output/R24h/cleaveLand_result/t_plot/PC-3p-12911_938_XM_016096014.2_993_TPlot.pdf	0	0	32.4181	8.3342e-15	9.59436e-15	yes	GO:0008652(cellular amino acid biosynthetic process);GO:1901605(alpha-amino acid metabolic process);GO:0019842(vitamin binding);GO:0006520(cellular amino acid metabolic process);GO:1901576(organic substance biosynthetic process);GO:0005488(binding);GO:0043168(anion binding);GO:0044238(primary metabolic process);GO:0009097(isoleucine biosynthetic process);GO:1901607(alpha-amino acid biosynthetic p…	ko01100(Metabolic pathways);ko00260(Glycine, serine and threonine metabolism);ko01200(Carbon metabolism);ko01110(Biosynthesis of secondary metabolites);ko01230(Biosynthesis of amino acids);ko00290(Valine, leucine and isoleucine biosynthesis)
PC-3p-12911_938	XM_016096457.2	1794	1819	1810	-28.7	-18.8	0.655052	12	2-13,1818-1807;14-21,1801-1794	1-1,1819-1819[UP5];x-x,1806-1802[BULt]	((((((((.....((((((((((((.&.))))))))))))-----))))))))	GUUGGGCUUCAGUACUUGGUUGAGGC&UUUUUAAUUAAGU-----AGCUCAGC	0	0	NA	NA	NA	3	98.052	3	0.913572	Output/R8h/cleaveLand_result/t_plot/PC-3p-12911_938_XM_016096457.2_1810_TPlot.pdf	2	64.8361	3	0.896867	Output/R24h/cleaveLand_result/t_plot/PC-3p-12911_938_XM_016096457.2_1810_TPlot.pdf	0	98.052	64.8361	1.2804e-20	5.64196e-20	yes	GO:0016830(carbon-carbon lyase activity);GO:0009445(putrescine metabolic process);GO:0009056(catabolic process);GO:0003824(catalytic activity);GO:0044237(cellular metabolic process);GO:0006596(polyamine biosynthetic process);GO:0006595(polyamine metabolic process);GO:0006525(arginine metabolic process);GO:0044281(small molecule metabolic process);GO:0044249(cellular biosynthetic process);GO:19015…	ko01100(Metabolic pathways);ko00330(Arginine and proline metabolism)
PC-3p-12911_938	XM_016097338.2	895	920	907	-28.7	-19.66	0.685017	15.5	1-6,920-915;9-14,908-903;15-21,901-895	7-8,914-909[AILt];x-x,902-902[BULt]	(((((((.((((((......((((((&))))))----..))))))-)))))))	GCUGAGCUUGCUUAUGUGGGUGAAGA&UUUUUA----AUUAAGUA-GCUCAGC	1	39.6024	4	0.99994	Output/R0h/cleaveLand_result/t_plot/PC-3p-12911_938_XM_016097338.2_907_TPlot.pdf	0	0	NA	NA	NA	0	0	NA	NA	NA	39.6024	0	0	6.3194e-18	1.52182e-17	yes	GO:0005355(glucose transmembrane transporter activity);GO:0005215(transporter activity);GO:1904659(glucose transmembrane transport);GO:0015749(monosaccharide transport);GO:0005623(cell);GO:0055085(transmembrane transport);GO:0015144(carbohydrate transmembrane transporter activity);GO:0005402(cation:sugar symporter activity);GO:0015294(solute:cation symporter activity);GO:0015075(ion transmembrane…	NA
PC-3p-12911_938	XM_016100158.2	988	1008	999	-28.7	-19.04	0.663415	12.5	1-5,1008-1004;11-21,998-988	6-10,1003-999[SIL]	(((((((((((.....(((((&))))).....)))))))))))	GCUGAGUUACUCGAAGGAGAA&UUUUUAAUUAAGUAGCUCAGC	0	0	NA	NA	NA	0	0	NA	NA	NA	2	64.8361	3	0.839062	Output/R24h/cleaveLand_result/t_plot/PC-3p-12911_938_XM_016100158.2_999_TPlot.pdf	0	0	64.8361	6.941e-29	3.45403e-28	yes	NA	NA
PC-3p-12911_938	XM_016101256.2	736	757	747	-28.7	-18.7	0.651568	13	2-9,756-749;14-21,743-736	1-1,757-757[UP5];10-13,748-744[AILt]	((((((((.....((((((((.&.))))))))-....))))))))	GCUGAGCUUGGAGAGUUGAAGC&UUUUUAAUU-AAGUAGCUCAGC	1	39.6024	4	1	Output/R0h/cleaveLand_result/t_plot/PC-3p-12911_938_XM_016101256.2_747_TPlot.pdf	0	0	NA	NA	NA	0	0	NA	NA	NA	39.6024	0	0	6.3194e-18	1.52182e-17	yes	GO:0003723(RNA binding);GO:0097159(organic cyclic compound binding);GO:0003676(nucleic acid binding);GO:1901265(nucleoside phosphate binding);GO:0000166(nucleotide binding);GO:0005488(binding);GO:0036094(small molecule binding);GO:1901363(heterocyclic compound binding)	ko03013(RNA transport);ko03040(Spliceosome);ko03015(mRNA surveillance pathway)
PC-3p-12911_938	XM_016102597.2	186	210	201	-28.7	-18.9	0.658537	8	2-17,209-194;18-20,189-187	1-1,210-210[UP5];x-x,193-190[BULt];21-21,186-186[UP3]	.(((....((((((((((((((((.&.))))))))))))))))----))).	CCUGUACUAGCUACUUAAUUAGGAC&UUUUUAAUUAAGUAGCU----CAGC	0	0	NA	NA	NA	1	32.684	4	1	Output/R8h/cleaveLand_result/t_plot/PC-3p-12911_938_XM_016102597.2_201_TPlot.pdf	0	0	NA	NA	NA	0	32.684	0	6.3879e-15	9.59436e-15	yes	NA	ko04122(Sulfur relay system)
PC-3p-12911_938	XM_016103522.2	1860	1880	1871	-28.7	-19.2	0.66899	16.5	9-21,1872-1860	1-8,1880-1873[UP5]	(((((((((((((........&........)))))))))))))	GCUGGGCUAUUUAUGGAAUUC&UUUUUAAUUAAGUAGCUCAGC	1	39.6024	4	1	Output/R0h/cleaveLand_result/t_plot/PC-3p-12911_938_XM_016103522.2_1871_TPlot.pdf	0	0	NA	NA	NA	0	0	NA	NA	NA	39.6024	0	0	6.3194e-18	1.52182e-17	yes	GO:1901565(organonitrogen compound catabolic process);GO:0044238(primary metabolic process);GO:0006508(proteolysis);GO:0019787(ubiquitin-like protein transferase activity);GO:0036211(protein modification process);GO:0005622(intracellular);GO:0009987(cellular process);GO:0019941(modification-dependent protein catabolic process);GO:0044248(cellular catabolic process);GO:0016740(transferase activity…	ko04120(Ubiquitin mediated proteolysis);ko04144(Endocytosis)
PC-3p-12911_938	XM_016103644.2	154	176	165	-28.7	-19.26	0.67108	14	1-6,176-171;10-21,165-154	7-9,170-166[AILt]	((((((((((((.....((((((&))))))--...))))))))))))	GCUGAGUUGCUUCUUUGUGGGAA&UUUUUA--AUUAAGUAGCUCAGC	2	79.2048	2	0.987976	Output/R0h/cleaveLand_result/t_plot/PC-3p-12911_938_XM_016103644.2_165_TPlot.pdf	0	0	NA	NA	NA	0	0	NA	NA	NA	79.2048	0	0	3.9892e-35	3.86508e-34	yes	GO:0004672(protein kinase activity);GO:0016772(transferase activity, transferring phosphorus-containing groups);GO:0050896(response to stimulus);GO:0005623(cell);GO:0043231(intracellular membrane-bounded organelle);GO:0043168(anion binding);GO:0032555(purine ribonucleotide binding);GO:0032553(ribonucleotide binding);GO:0006796(phosphate-containing compound metabolic process);GO:0019538(protein me…	NA
PC-3p-12911_938	XM_016103878.2	530	550	541	-28.7	-19	0.662021	13	6-11,545-540;14-21,537-530	1-5,550-546[UP5];12-13,539-538[SIL]	((((((((..((((((.....&.....))))))..))))))))	GCUGAGCUUAUUGAUUCCGUU&UUUUUAAUUAAGUAGCUCAGC	3	118.807	2	0.994626	Output/R0h/cleaveLand_result/t_plot/PC-3p-12911_938_XM_016103878.2_541_TPlot.pdf	5	163.42	2	0.999127	Output/R8h/cleaveLand_result/t_plot/PC-3p-12911_938_XM_016103878.2_541_TPlot.pdf	0	0	NA	NA	NA	118.807	163.42	0	1.1414e-33	1.06961e-32	yes	GO:0097367(carbohydrate derivative binding);GO:0005200(structural constituent of cytoskeleton);GO:0016817(hydrolase activity, acting on acid anhydrides);GO:0016462(pyrophosphatase activity);GO:0032553(ribonucleotide binding);GO:0001883(purine nucleoside binding);GO:0005737(cytoplasm);GO:0017111(nucleoside-triphosphatase activity);GO:0044464(cell part);GO:0005622(intracellular);GO:0005874(microtub…	ko04145(Phagosome)
PC-3p-12911_938	XM_016106384.2	213	235	225	-28.7	-21.5	0.749129	9.5	1-9,235-227;11-16,224-219;17-21,217-213	10-10,226-225[AILt];x-x,218-218[BULt]	(((((.((((((..(((((((((&)))))))))-.))))))-)))))	GCUGAGGCUGCUAGGAUUAGGGA&UUUUUAAUU-AAGUAGC-UCAGC	0	0	NA	NA	NA	1	32.684	4	0.684541	Output/R8h/cleaveLand_result/t_plot/PC-3p-12911_938_XM_016106384.2_225_TPlot.pdf	0	0	NA	NA	NA	0	32.684	0	6.3879e-15	9.59436e-15	yes	GO:0009987(cellular process);GO:0061919(process utilizing autophagic mechanism);GO:0006914(autophagy);GO:0008152(metabolic process);GO:0009056(catabolic process);GO:0044248(cellular catabolic process);GO:0044237(cellular metabolic process)	ko04136(Autophagy - other)
PC-3p-12911_938	XM_016106983.2	53	77	68	-28.7	-19.3	0.672474	11	1-10,77-68;11-19,64-56;20-21,54-53	x-x,67-65[BULt];x-x,55-55[BULt]	((.(((((((((...((((((((((&))))))))))---)))))))))-))	GUGUGAGCUGCUUUUUAGUUGAGAA&UUUUUAAUUA---AGUAGCUCA-GC	1	39.6024	4	0.999999	Output/R0h/cleaveLand_result/t_plot/PC-3p-12911_938_XM_016106983.2_68_TPlot.pdf	0	0	NA	NA	NA	0	0	NA	NA	NA	39.6024	0	0	6.3194e-18	1.52182e-17	yes	GO:0016491(oxidoreductase activity);GO:0055114(oxidation-reduction process);GO:0003824(catalytic activity);GO:0008152(metabolic process)	ko00750(Vitamin B6 metabolism);ko01100(Metabolic pathways)
PC-3p-12911_938	XM_016108132.2	1637	1658	1649	-28.7	-21.2	0.738676	12	5-18,1654-1641;19-21,1639-1637	1-4,1658-1655[UP5];x-x,1640-1640[BULt]	(((.((((((((((((((....&....))))))))))))))-)))	GCUAGGGCUGCUUGGUUGUCUG&UUUUUAAUUAAGUAGCUC-AGC	0	0	NA	NA	NA	1	32.684	4	0.814781	Output/R8h/cleaveLand_result/t_plot/PC-3p-12911_938_XM_016108132.2_1649_TPlot.pdf	1	32.4181	4	0.825504	Output/R24h/cleaveLand_result/t_plot/PC-3p-12911_938_XM_016108132.2_1649_TPlot.pdf	0	32.684	32.4181	8.5335e-08	8.81903e-08	yes	GO:0005777(peroxisome);GO:0003997(acyl-CoA oxidase activity);GO:0016042(lipid catabolic process);GO:0009987(cellular process);GO:0050662(coenzyme binding);GO:1901575(organic substance catabolic process);GO:0072329(monocarboxylic acid catabolic process);GO:0044255(cellular lipid metabolic process);GO:0016627(oxidoreductase activity, acting on the CH-CH group of donors);GO:0019395(fatty acid oxidat…	ko00071(Fatty acid degradation);ko01110(Biosynthesis of secondary metabolites);ko01040(Biosynthesis of unsaturated fatty acids);ko01212(Fatty acid metabolism);ko00592(alpha-Linolenic acid metabolism);ko01100(Metabolic pathways);ko04146(Peroxisome)
PC-3p-12911_938	XM_016109009.2	1020	1040	1031	-28.7	-19.5	0.679443	7	3-12,1038-1029;14-17,1028-1025;18-21,1023-1020	1-2,1040-1039[UP5];13-13,x-x[BULq];x-x,1024-1024[BULt]	((((.((((-((((((((((..&..)))))))))).))))-))))	GCUGAAGCU-CUUAAUUGGACA&UUUUUAAUUAAGUAGCU-CAGC	0	0	NA	NA	NA	1	32.684	4	0.999999	Output/R8h/cleaveLand_result/t_plot/PC-3p-12911_938_XM_016109009.2_1031_TPlot.pdf	1	32.4181	4	0.999999	Output/R24h/cleaveLand_result/t_plot/PC-3p-12911_938_XM_016109009.2_1031_TPlot.pdf	0	32.684	32.4181	8.5335e-08	8.81903e-08	yes	NA	ko04626(Plant-pathogen interaction)
PC-3p-12911_938	XM_016109458.2	2330	2354	2340	-28.7	-19.6	0.682927	12.5	1-8,2354-2347;9-16,2341-2334;18-21,2333-2330	x-x,2346-2342[BULt];17-17,x-x[BULq]	((((-((((((((.....((((((((&))))))))-----)))))))).))))	GCUG-GCUGCUUAGAGAAGUUAAAAA&UUUUUAAU-----UAAGUAGCUCAGC	3	118.807	2	0.958281	Output/R0h/cleaveLand_result/t_plot/PC-3p-12911_938_XM_016109458.2_2340_TPlot.pdf	0	0	NA	NA	NA	0	0	NA	NA	NA	118.807	0	0	2.5157e-52	6.74078e-51	yes	GO:0097159(organic cyclic compound binding);GO:0030554(adenyl nucleotide binding);GO:0036094(small molecule binding);GO:0005524(ATP binding);GO:0017076(purine nucleotide binding);GO:0032555(purine ribonucleotide binding);GO:1901363(heterocyclic compound binding);GO:0035639(purine ribonucleoside triphosphate binding);GO:1901265(nucleoside phosphate binding);GO:0003824(catalytic activity);GO:003255…	ko03440(Homologous recombination)
PC-3p-12911_938	XM_016112573.2	596	616	607	-28.7	-18.94	0.65993	15	1-6,616-611;12-21,605-596	7-11,610-606[SIL]	((((((((((.....((((((&)))))).....))))))))))	GCUGAGCUAUGUCAGUGGGGA&UUUUUAAUUAAGUAGCUCAGC	0	0	NA	NA	NA	1	32.684	4	1	Output/R8h/cleaveLand_result/t_plot/PC-3p-12911_938_XM_016112573.2_607_TPlot.pdf	0	0	NA	NA	NA	0	32.684	0	6.3879e-15	9.59436e-15	yes	GO:0044085(cellular component biogenesis);GO:0071704(organic substance metabolic process);GO:0019538(protein metabolic process);GO:0010556(regulation of macromolecule biosynthetic process);GO:0097159(organic cyclic compound binding);GO:0043170(macromolecule metabolic process);GO:0044260(cellular macromolecule metabolic process);GO:0034645(cellular macromolecule biosynthetic process);GO:0044237(ce…	ko03013(RNA transport)
PC-3p-12911_938	XM_016113512.1	874	894	885	-28.7	-19.1	0.665505	12	6-19,889-876	1-5,894-890[UP5];20-21,875-874[UP3]	..((((((((((((((.....&.....))))))))))))))..	UGUGAGCUACUUGAUUCCAUC&UUUUUAAUUAAGUAGCUCAGC	0	0	NA	NA	NA	1	32.684	4	1	Output/R8h/cleaveLand_result/t_plot/PC-3p-12911_938_XM_016113512.1_885_TPlot.pdf	0	0	NA	NA	NA	0	32.684	0	6.3879e-15	9.59436e-15	yes	GO:0043167(ion binding);GO:1901575(organic substance catabolic process);GO:0005623(cell);GO:0061630(ubiquitin protein ligase activity);GO:0071704(organic substance metabolic process);GO:0006807(nitrogen compound metabolic process);GO:0043161(proteasome-mediated ubiquitin-dependent protein catabolic process);GO:0009057(macromolecule catabolic process);GO:0043227(membrane-bounded organelle);GO:0016…	NA
PC-3p-12911_938	XM_016114808.2	1645	1665	1656	-28.7	-20	0.696864	16	9-21,1657-1645	1-8,1665-1658[UP5]	(((((((((((((........&........)))))))))))))	GCUGAGUUGCUUAUGGAUUUC&UUUUUAAUUAAGUAGCUCAGC	0	0	NA	NA	NA	0	0	NA	NA	NA	1	32.4181	4	0.999831	Output/R24h/cleaveLand_result/t_plot/PC-3p-12911_938_XM_016114808.2_1656_TPlot.pdf	0	0	32.4181	8.3342e-15	9.59436e-15	yes	GO:0008270(zinc ion binding);GO:0043167(ion binding);GO:0046914(transition metal ion binding);GO:0043169(cation binding);GO:0005488(binding);GO:0046872(metal ion binding)	NA
PC-3p-12911_938	XM_016115678.2	1381	1402	1393	-28.7	-18.9	0.658537	8	2-6,1401-1397;8-17,1395-1386;18-21,1384-1381	1-1,1402-1402[UP5];7-7,1396-1396[SIL];x-x,1385-1385[BULt]	((((.((((((((((.(((((.&.))))).))))))))))-))))	GCUGAAGUUGCUUGAGUGGAAC&UUUUUAAUUAAGUAGCU-CAGC	2	79.2048	3	0.759342	Output/R0h/cleaveLand_result/t_plot/PC-3p-12911_938_XM_016115678.2_1393_TPlot.pdf	1	32.684	4	1	Output/R8h/cleaveLand_result/t_plot/PC-3p-12911_938_XM_016115678.2_1393_TPlot.pdf	0	0	NA	NA	NA	79.2048	32.684	0	3.556e-19	1.45865e-18	yes	GO:0016020(membrane);GO:0051179(localization);GO:0031224(intrinsic component of membrane);GO:0051234(establishment of localization);GO:0044425(membrane part);GO:0006810(transport);GO:0016021(integral component of membrane)	NA
PC-3p-12911_938	XM_016115841.2	209	219	210	-28.7	-19.6	0.682927	2	12-21,218-209	11-11,219-219[SIL]	((((((((((.&.))))))))))	GCUGAGCUACA&UUUUUAAUUAA	1	39.6024	4	0.999971	Output/R0h/cleaveLand_result/t_plot/PC-3p-12911_938_XM_016115841.2_210_TPlot.pdf	0	0	NA	NA	NA	1	32.4181	4	0.999998	Output/R24h/cleaveLand_result/t_plot/PC-3p-12911_938_XM_016115841.2_210_TPlot.pdf	39.6024	0	32.4181	8.8481e-09	9.41666e-09	yes	NA	NA
PC-3p-12911_938	XM_016116515.2	1065	1086	1076	-28.7	-19.22	0.669686	12	1-4,1086-1083;8-10,1078-1076;12-21,1074-1065	5-7,1082-1079[AILt];11-11,1075-1075[SIL]	((((((((((.(((....((((&))))-...))).))))))))))	GCUGAGCUACCUGAGACUGAAA&UUUU-UAAUUAAGUAGCUCAGC	0	0	NA	NA	NA	0	0	NA	NA	NA	1	32.4181	4	1	Output/R24h/cleaveLand_result/t_plot/PC-3p-12911_938_XM_016116515.2_1076_TPlot.pdf	0	0	32.4181	8.3342e-15	9.59436e-15	yes	GO:1902493(acetyltransferase complex);GO:0044451(nucleoplasm part);GO:0005623(cell);GO:0005654(nucleoplasm);GO:0005634(nucleus);GO:0043233(organelle lumen);GO:0031974(membrane-enclosed lumen);GO:0044422(organelle part);GO:0043229(intracellular organelle);GO:0044424(intracellular part);GO:0044446(intracellular organelle part);GO:0043226(organelle);GO:0031248(protein acetyltransferase complex);GO:0…	NA
PC-3p-12911_938	XM_016117918.2	344	364	355	-28.7	-22.88	0.797213	8.5	1-5,364-360;9-21,356-344	6-8,359-357[SIL]	(((((((((((((...(((((&)))))...)))))))))))))	GCUGGGCUACUUACAGAGAGA&UUUUUAAUUAAGUAGCUCAGC	1	39.6024	4	0.254918	Output/R0h/cleaveLand_result/t_plot/PC-3p-12911_938_XM_016117918.2_355_TPlot.pdf	0	0	NA	NA	NA	0	0	NA	NA	NA	39.6024	0	0	6.3194e-18	1.52182e-17	yes	GO:0008270(zinc ion binding);GO:0043169(cation binding);GO:0043167(ion binding);GO:0046872(metal ion binding);GO:0046914(transition metal ion binding);GO:0005488(binding)	NA
PC-3p-12911_938	XM_021127199.1	1914	1924	1915	-28.7	-19.3	0.672474	3	12-21,1923-1914	11-11,1924-1924[SIL]	((((((((((.&.))))))))))	GCUGAGCUGCA&UUUUUAAUUAA	0	0	NA	NA	NA	1	32.684	4	1	Output/R8h/cleaveLand_result/t_plot/PC-3p-12911_938_XM_021127199.1_1915_TPlot.pdf	0	0	NA	NA	NA	0	32.684	0	6.3879e-15	9.59436e-15	yes	GO:0004386(helicase activity);GO:0042623(ATPase activity, coupled);GO:0097367(carbohydrate derivative binding);GO:0043227(membrane-bounded organelle);GO:0017076(purine nucleotide binding);GO:0030554(adenyl nucleotide binding);GO:0005488(binding);GO:0043226(organelle);GO:0032555(purine ribonucleotide binding);GO:0016887(ATPase activity);GO:0016462(pyrophosphatase activity);GO:0005524(ATP binding);…	NA
PC-3p-12911_938	XM_021127209.1	385	405	396	-28.7	-22.88	0.797213	8.5	1-5,405-401;9-21,397-385	6-8,400-398[SIL]	(((((((((((((...(((((&)))))...)))))))))))))	GCUGGGCUACUUACAGAGAGA&UUUUUAAUUAAGUAGCUCAGC	0	0	NA	NA	NA	0	0	NA	NA	NA	2	64.8361	2	0.107316	Output/R24h/cleaveLand_result/t_plot/PC-3p-12911_938_XM_021127209.1_396_TPlot.pdf	0	0	64.8361	6.941e-29	3.45403e-28	yes	GO:0008270(zinc ion binding);GO:0043169(cation binding);GO:0043167(ion binding);GO:0046872(metal ion binding);GO:0046914(transition metal ion binding);GO:0005488(binding)	NA
PC-3p-12911_938	XM_021128747.1	753	775	765	-28.7	-20.1	0.700348	11.5	1-8,775-768;11-16,764-759;17-21,757-753	9-10,767-765[AILt];x-x,758-758[BULt]	(((((.((((((...((((((((&))))))))-..))))))-)))))	GCUGGUGCUACUGCUGUUGAGGA&UUUUUAAU-UAAGUAGC-UCAGC	1	39.6024	4	0.998276	Output/R0h/cleaveLand_result/t_plot/PC-3p-12911_938_XM_021128747.1_765_TPlot.pdf	0	0	NA	NA	NA	1	32.4181	4	0.999647	Output/R24h/cleaveLand_result/t_plot/PC-3p-12911_938_XM_021128747.1_765_TPlot.pdf	39.6024	0	32.4181	8.8481e-09	9.41666e-09	yes	GO:0016684(oxidoreductase activity, acting on peroxide as acceptor);GO:0003824(catalytic activity);GO:1901363(heterocyclic compound binding);GO:0016491(oxidoreductase activity);GO:0042221(response to chemical);GO:0009636(response to toxic substance);GO:1990748(cellular detoxification);GO:0098754(detoxification);GO:0004601(peroxidase activity);GO:0050896(response to stimulus);GO:0046906(tetrapyrro…	ko00053(Ascorbate and aldarate metabolism);ko00480(Glutathione metabolism)
PC-3p-12911_938	XM_021128748.1	753	775	765	-28.7	-20.1	0.700348	11.5	1-8,775-768;11-16,764-759;17-21,757-753	9-10,767-765[AILt];x-x,758-758[BULt]	(((((.((((((...((((((((&))))))))-..))))))-)))))	GCUGGUGCUACUGCUGUUGAGGA&UUUUUAAU-UAAGUAGC-UCAGC	1	39.6024	4	0.997966	Output/R0h/cleaveLand_result/t_plot/PC-3p-12911_938_XM_021128748.1_765_TPlot.pdf	0	0	NA	NA	NA	0	0	NA	NA	NA	39.6024	0	0	6.3194e-18	1.52182e-17	yes	GO:0016684(oxidoreductase activity, acting on peroxide as acceptor);GO:0003824(catalytic activity);GO:1901363(heterocyclic compound binding);GO:0016491(oxidoreductase activity);GO:0042221(response to chemical);GO:0009636(response to toxic substance);GO:1990748(cellular detoxification);GO:0098754(detoxification);GO:0004601(peroxidase activity);GO:0050896(response to stimulus);GO:0046906(tetrapyrro…	ko00053(Ascorbate and aldarate metabolism);ko00480(Glutathione metabolism)
PC-3p-12911_938	XM_021130240.1	1126	1146	1137	-28.7	-20	0.696864	15.5	9-21,1138-1126	1-8,1146-1139[UP5]	(((((((((((((........&........)))))))))))))	GCUGAGUUACUUAUCCAAAAG&UUUUUAAUUAAGUAGCUCAGC	0	0	NA	NA	NA	0	0	NA	NA	NA	1	32.4181	4	0.999834	Output/R24h/cleaveLand_result/t_plot/PC-3p-12911_938_XM_021130240.1_1137_TPlot.pdf	0	0	32.4181	8.3342e-15	9.59436e-15	yes	NA	NA
PC-3p-12911_938	XM_021132052.1	824	844	835	-28.7	-19.6	0.682927	16.5	9-21,836-824	1-8,844-837[UP5]	(((((((((((((........&........)))))))))))))	GCUGAGUUACUUGCUGCUGCC&UUUUUAAUUAAGUAGCUCAGC	1	39.6024	4	0.999965	Output/R0h/cleaveLand_result/t_plot/PC-3p-12911_938_XM_021132052.1_835_TPlot.pdf	0	0	NA	NA	NA	0	0	NA	NA	NA	39.6024	0	0	6.3194e-18	1.52182e-17	yes	GO:0033036(macromolecule localization);GO:0043231(intracellular membrane-bounded organelle);GO:0033365(protein localization to organelle);GO:0071705(nitrogen compound transport);GO:0043227(membrane-bounded organelle);GO:0071702(organic substance transport);GO:0008565(protein transporter activity);GO:0005737(cytoplasm);GO:0015031(protein transport);GO:0051234(establishment of localization);GO:0034…	NA
PC-3p-12911_938	XM_021137257.1	2281	2301	2292	-28.7	-19.5	0.679443	7.5	2-5,2300-2297;8-13,2294-2289;15-21,2287-2281	1-1,2301-2301[UP5];6-7,2296-2295[SIL];14-14,2288-2288[SIL]	(((((((.((((((..((((.&.))))..)))))).)))))))	GCUGAGCAGCUUAAGGGAAAU&UUUUUAAUUAAGUAGCUCAGC	0	0	NA	NA	NA	1	32.684	4	0.999999	Output/R8h/cleaveLand_result/t_plot/PC-3p-12911_938_XM_021137257.1_2292_TPlot.pdf	0	0	NA	NA	NA	0	32.684	0	6.3879e-15	9.59436e-15	yes	GO:0017111(nucleoside-triphosphatase activity);GO:0003824(catalytic activity);GO:0044424(intracellular part);GO:0008092(cytoskeletal protein binding);GO:0032991(macromolecular complex);GO:0006928(movement of cell or subcellular component);GO:0016818(hydrolase activity, acting on acid anhydrides, in phosphorus-containing anhydrides);GO:0007018(microtubule-based movement);GO:1990939(ATP-dependent m…	NA
PC-3p-12911_938	XM_021137571.1	901	926	913	-28.7	-19.66	0.685017	15.5	1-6,926-921;9-14,914-909;15-21,907-901	7-8,920-915[AILt];x-x,908-908[BULt]	(((((((.((((((......((((((&))))))----..))))))-)))))))	GCUGAGCUUGCUUAUGUGGGUGAAGA&UUUUUA----AUUAAGUA-GCUCAGC	1	39.6024	4	0.999939	Output/R0h/cleaveLand_result/t_plot/PC-3p-12911_938_XM_021137571.1_913_TPlot.pdf	0	0	NA	NA	NA	0	0	NA	NA	NA	39.6024	0	0	6.3194e-18	1.52182e-17	yes	GO:0005355(glucose transmembrane transporter activity);GO:0005215(transporter activity);GO:1904659(glucose transmembrane transport);GO:0015749(monosaccharide transport);GO:0005623(cell);GO:0055085(transmembrane transport);GO:0015144(carbohydrate transmembrane transporter activity);GO:0005402(cation:sugar symporter activity);GO:0015294(solute:cation symporter activity);GO:0015075(ion transmembrane…	NA
PC-3p-12911_938	XM_021137572.1	799	824	811	-28.7	-19.66	0.685017	15.5	1-6,824-819;9-14,812-807;15-21,805-799	7-8,818-813[AILt];x-x,806-806[BULt]	(((((((.((((((......((((((&))))))----..))))))-)))))))	GCUGAGCUUGCUUAUGUGGGUGAAGA&UUUUUA----AUUAAGUA-GCUCAGC	1	39.6024	4	0.999943	Output/R0h/cleaveLand_result/t_plot/PC-3p-12911_938_XM_021137572.1_811_TPlot.pdf	0	0	NA	NA	NA	0	0	NA	NA	NA	39.6024	0	0	6.3194e-18	1.52182e-17	yes	GO:0005355(glucose transmembrane transporter activity);GO:0005215(transporter activity);GO:1904659(glucose transmembrane transport);GO:0015749(monosaccharide transport);GO:0005623(cell);GO:0055085(transmembrane transport);GO:0015144(carbohydrate transmembrane transporter activity);GO:0005402(cation:sugar symporter activity);GO:0015294(solute:cation symporter activity);GO:0015075(ion transmembrane…	NA
[truncated: 22,337 more rows]
