# Supplementary material for: Integration of Small RNA and Degradome Sequencing Reveals the Regulatory Network of Al-Induced Programmed Cell Death in Peanut
Source: Int J Mol Sci. 2021 Dec 27;23(1):246. doi: 10.3390/ijms23010246 (PMC8745729; doi:10.3390/ijms23010246)
Supplement: Supplementary file 1 [file ijms-23-00246-s001.zip › Table S5-2 The predicted targets of known and novel miRNAs in T8hvsT0h.xlsx]

## Sheet: R0hvsR8h
Table S5-2 The predicted targets of known and novel miRNAs in T8hvsT0h
Item	Description
TStart	Start position of mRNA and miRNA alignment region
TStop	End position of mRNA and miRNA alignment region
TSlice	Degradation site
AllenScore	Penalty score of mismatched bases between the miRNA and its target (the lower the value, the better)
Paired	Paired position (format is miRNA (5 '- 3'), mRNA (3 '- 5'), " ;" for segmentation.)
Unpaired	Unpaired position
Structure	Secondary structure
DegradomeCategory	Category 0:over one raw read at the position, abundance at the position is equal to the maximum on the transcript, and there is only one maximum on the transcript
	Category 1:over one raw read at the position, abundance at the position is equal to the maximum on the transcript, and there is more than one maximum position on the transcript
	Category 2:over one raw read at the position, abundance at position is less than the maximum but higher than the median for the transcript
	Category 3:over one raw read at the position, abundance at the position is equal to or less than the median for the transcript
	Category 4:only one raw read at the position
Query	Transcript	TStart	TStop	TSlice	MFEperfect	MFEsite	MFEratio	AllenScore	Paired	Unpaired	Structure	Sequence	DegradomeRawReads(R8h)	DegradomeNormReads(R8h)	DegradomeCategory(R8h)	DegradomePval(R8h)	Tplot_file_path(R8h)	DegradomeRawReads(R0h)	DegradomeNormReads(R0h)	DegradomeCategory(R0h)	DegradomePval(R0h)	Tplot_file_path(R0h)	T8h	T0h	log2(fold_change)	regulation	pvalue	qvalue	significant	GO	KEGG
PC-3p-100264_81	BGI_novel_T006108	274	296	289	-52.3	-35.4	0.676864	9.5	1-7,296-290;10-14,289-285;15-23,283-275	8-9,x-x[BULq];x-x,284-284[BULt];24-24,274-274[UP3]	.(((((((((.(((((--(((((((&)))))))..)))))-))))))))).	AGCUGCAGGCUCAGGU--GGGCUAA&UUGGCCUUAGCCUG-GCCUGUAGCC	1	32.684	4	0.883765	Output/R8h/cleaveLand_result/t_plot/PC-3p-100264_81_BGI_novel_T006108_289_TPlot.pdf	0	0	NA	NA	NA	32.684	0	Inf	up	1.084e-08	1.2485e-08	yes	GO:0097159(organic cyclic compound binding);GO:1901363(heterocyclic compound binding);GO:0005488(binding);GO:0003676(nucleic acid binding);GO:0003677(DNA binding)	NA
PC-3p-100264_81	BGI_novel_T007846	2931	2962	2953	-52.3	-35.8	0.684512	10.5	1-14,2962-2949;15-16,2946-2945;17-18,2943-2942;19-24,2936-2931	x-x,2948-2947[BULt];x-x,2944-2944[BULt];x-x,2941-2937[BULt]	((((((.....((.((..((((((((((((((&))))))))))))))--))-))-----))))))	GGCUAUGAAAUGGAGCAUCAGGCUGAGGCCAG&UUGGCCUUAGCCUG--GC-CU-----GUAGCC	1	32.684	4	0.747311	Output/R8h/cleaveLand_result/t_plot/PC-3p-100264_81_BGI_novel_T007846_2953_TPlot.pdf	0	0	NA	NA	NA	32.684	0	Inf	up	1.084e-08	1.2485e-08	yes	GO:0044238(primary metabolic process);GO:0044260(cellular macromolecule metabolic process);GO:0043231(intracellular membrane-bounded organelle);GO:0016311(dephosphorylation);GO:0043226(organelle);GO:0005622(intracellular);GO:0044267(cellular protein metabolic process);GO:0043412(macromolecule modification);GO:0005623(cell);GO:0004721(phosphoprotein phosphatase activity);GO:0003824(catalytic activ…	ko03013(RNA transport);ko03040(Spliceosome);ko03015(mRNA surveillance pathway)
PC-3p-100264_81	BGI_novel_T007848	2913	2944	2935	-52.3	-35.8	0.684512	10.5	1-14,2944-2931;15-16,2928-2927;17-18,2925-2924;19-24,2918-2913	x-x,2930-2929[BULt];x-x,2926-2926[BULt];x-x,2923-2919[BULt]	((((((.....((.((..((((((((((((((&))))))))))))))--))-))-----))))))	GGCUAUGAAAUGGAGCAUCAGGCUGAGGCCAG&UUGGCCUUAGCCUG--GC-CU-----GUAGCC	1	32.684	4	0.741642	Output/R8h/cleaveLand_result/t_plot/PC-3p-100264_81_BGI_novel_T007848_2935_TPlot.pdf	0	0	NA	NA	NA	32.684	0	Inf	up	1.084e-08	1.2485e-08	yes	GO:0044238(primary metabolic process);GO:0044260(cellular macromolecule metabolic process);GO:0043231(intracellular membrane-bounded organelle);GO:0016311(dephosphorylation);GO:0043226(organelle);GO:0005622(intracellular);GO:0044267(cellular protein metabolic process);GO:0043412(macromolecule modification);GO:0005623(cell);GO:0004721(phosphoprotein phosphatase activity);GO:0003824(catalytic activ…	ko03013(RNA transport);ko03040(Spliceosome);ko03015(mRNA surveillance pathway)
PC-3p-100264_81	BGI_novel_T011713	1250	1273	1264	-52.3	-34.3	0.655832	11	4-6,1270-1268;8-20,1266-1254;22-23,1252-1251	1-3,1273-1271[UP5];7-7,1267-1267[SIL];21-21,1253-1253[SIL];24-24,1250-1250[UP3]	.((.(((((((((((((.(((...&...))).))))))))))))).)).	CGCGGCAGGUCAGGCUGCGGCAUA&UUGGCCUUAGCCUGGCCUGUAGCC	1	32.684	4	0.981972	Output/R8h/cleaveLand_result/t_plot/PC-3p-100264_81_BGI_novel_T011713_1264_TPlot.pdf	0	0	NA	NA	NA	32.684	0	Inf	up	1.084e-08	1.2485e-08	yes	GO:0006810(transport);GO:0044425(membrane part);GO:0032559(adenyl ribonucleotide binding);GO:0022857(transmembrane transporter activity);GO:0017076(purine nucleotide binding);GO:0097367(carbohydrate derivative binding);GO:1901363(heterocyclic compound binding);GO:0042626(ATPase activity, coupled to transmembrane movement of substances);GO:0032553(ribonucleotide binding);GO:0000166(nucleotide bind…	ko02010(ABC transporters)
PC-3p-100264_81	XM_016079214.2	1633	1659	1650	-52.3	-34.8	0.665392	10.5	3-14,1657-1646;15-18,1644-1641;19-23,1638-1634	1-2,1659-1658[UP5];x-x,1645-1645[BULt];x-x,1640-1639[BULt];24-24,1633-1633[UP3]	.(((((..((((.((((((((((((..&..))))))))))))-))))--))))).	UGCUGCCCAGGCACAGGUUGAGGCUGU&UUGGCCUUAGCCUG-GCCU--GUAGCC	1	32.684	4	0.944107	Output/R8h/cleaveLand_result/t_plot/PC-3p-100264_81_XM_016079214.2_1650_TPlot.pdf	0	0	NA	NA	NA	32.684	0	Inf	up	1.084e-08	1.2485e-08	yes	GO:0051640(organelle localization);GO:0051649(establishment of localization in cell);GO:0019750(chloroplast localization);GO:0051179(localization);GO:0051234(establishment of localization);GO:0005829(cytosol);GO:0005623(cell);GO:0009904(chloroplast accumulation movement);GO:0009987(cellular process);GO:0051644(plastid localization);GO:0044444(cytoplasmic part);GO:0016043(cellular component organi…	NA
PC-3p-100264_81	XM_016080384.2	663	687	677	-52.3	-35.6	0.680688	11.5	2-4,686-684;7-23,680-664	1-1,687-687[UP5];5-6,683-681[AILt];24-24,663-663[UP3]	.(((((((((((((((((...(((.&.)))-..))))))))))))))))).	AGCUGCGGGCCGGGCUGAACUCCGC&UUGG-CCUUAGCCUGGCCUGUAGCC	1	32.684	4	0.854891	Output/R8h/cleaveLand_result/t_plot/PC-3p-100264_81_XM_016080384.2_677_TPlot.pdf	0	0	NA	NA	NA	32.684	0	Inf	up	1.084e-08	1.2485e-08	yes	GO:1901363(heterocyclic compound binding);GO:0005524(ATP binding);GO:0030554(adenyl nucleotide binding);GO:0043168(anion binding);GO:0043167(ion binding);GO:0035639(purine ribonucleoside triphosphate binding);GO:0005488(binding);GO:0097367(carbohydrate derivative binding);GO:0017076(purine nucleotide binding);GO:1901265(nucleoside phosphate binding);GO:0032555(purine ribonucleotide binding);GO:00…	ko04144(Endocytosis)
PC-3p-100264_81	XM_016087442.2	244	267	258	-52.3	-35.4	0.676864	9	3-8,265-260;10-15,258-253;16-19,251-248;22-24,246-244	1-2,267-266[UP5];9-9,259-259[SIL];x-x,252-252[BULt];20-21,247-247[AILq]	(((.-((((.((((((.((((((..&..)))))).))))))-))))..)))	GGCC-CAGGCCCAGGCCGAGGCCCA&UUGGCCUUAGCCUGG-CCUGUAGCC	1	32.684	4	0.881157	Output/R8h/cleaveLand_result/t_plot/PC-3p-100264_81_XM_016087442.2_258_TPlot.pdf	0	0	NA	NA	NA	32.684	0	Inf	up	1.084e-08	1.2485e-08	yes	NA	NA
PC-3p-100264_81	XM_016088174.2	1080	1104	1095	-52.3	-34.7	0.66348	7	1-14,1104-1091;15-19,1089-1085;21-21,1083-1083;23-24,1081-1080	x-x,1090-1090[BULt];20-20,1084-1084[SIL];22-22,1082-1082[SIL]	((.(.(((((.((((((((((((((&))))))))))))))-))))).).))	GGGUCUAGGCGUAGGUUGAGGCCGA&UUGGCCUUAGCCUG-GCCUGUAGCC	2	65.368	2	0.659656	Output/R8h/cleaveLand_result/t_plot/PC-3p-100264_81_XM_016088174.2_1095_TPlot.pdf	0	0	NA	NA	NA	65.368	0	Inf	up	6.2072e-16	2.71719e-15	yes	GO:0005488(binding);GO:0016021(integral component of membrane);GO:0035639(purine ribonucleoside triphosphate binding);GO:0006464(cellular protein modification process);GO:0004672(protein kinase activity);GO:0006793(phosphorus metabolic process);GO:0016773(phosphotransferase activity, alcohol group as acceptor);GO:0000166(nucleotide binding);GO:0006807(nitrogen compound metabolic process);GO:00717…	NA
PC-3p-100264_81	XM_016095616.2	565	589	580	-52.3	-36.1	0.690249	9.5	1-8,589-582;11-18,579-572;20-23,569-566	9-10,581-580[SIL];19-19,571-570[AILt];24-24,565-565[UP3]	.((((..((((((((..((((((((&))))))))..))))))))-.)))).	AGCUAAAGGGCCAGGAGGAGGCCGA&UUGGCCUUAGCCUGGCCU-GUAGCC	1	32.684	4	0.677463	Output/R8h/cleaveLand_result/t_plot/PC-3p-100264_81_XM_016095616.2_580_TPlot.pdf	0	0	NA	NA	NA	32.684	0	Inf	up	1.084e-08	1.2485e-08	yes	GO:0071704(organic substance metabolic process);GO:0090304(nucleic acid metabolic process);GO:0006396(RNA processing);GO:0008152(metabolic process);GO:0044237(cellular metabolic process);GO:0043170(macromolecule metabolic process);GO:0044260(cellular macromolecule metabolic process);GO:0034641(cellular nitrogen compound metabolic process);GO:0006725(cellular aromatic compound metabolic process);G…	ko03040(Spliceosome);ko03018(RNA degradation)
PC-3p-100264_81	XM_016098671.2	589	612	603	-52.3	-34.3	0.655832	5.5	1-12,612-601;14-16,600-598;17-18,596-595;20-20,593-593;22-24,591-589	13-13,x-x[BULq];x-x,597-597[BULt];19-19,594-594[SIL];21-21,592-592[SIL]	(((.(.((.(((-((((((((((((&)))))))))))).)))-)).).)))	GGCAAGAGAGCU-GGCUGAGGCCAA&UUGGCCUUAGCCUGGC-CUGUAGCC	0	0	NA	NA	NA	1	39.6024	4	0.966088	Output/R0h/cleaveLand_result/t_plot/PC-3p-100264_81_XM_016098671.2_603_TPlot.pdf	0	39.6024	-Inf	down	3.1118e-10	6.0287e-10	yes	GO:0016021(integral component of membrane);GO:0031224(intrinsic component of membrane);GO:0044425(membrane part);GO:0016020(membrane)	NA
PC-3p-100264_81	XM_016099540.2	7816	7840	7830	-52.3	-34.1	0.652008	9	1-5,7840-7836;6-14,7834-7826;16-21,7824-7819;23-24,7817-7816	x-x,7835-7835[BULt];15-15,7825-7825[SIL];22-22,7818-7818[SIL]	((.((((((.(((((((((.(((((&)))))-))))))))).)))))).))	GGGUGCAGGGCAGGUUGAGUGUUAG&UUGGC-CUUAGCCUGGCCUGUAGCC	1	32.684	4	0.990735	Output/R8h/cleaveLand_result/t_plot/PC-3p-100264_81_XM_016099540.2_7830_TPlot.pdf	0	0	NA	NA	NA	32.684	0	Inf	up	1.084e-08	1.2485e-08	yes	NA	NA
PC-3p-100264_81	XM_016100348.2	746	775	761	-52.3	-35.8	0.684512	15.5	2-7,774-769;8-9,763-762;11-14,760-757;15-24,755-746	1-1,775-775[UP5];x-x,768-764[BULt];10-10,761-761[SIL];x-x,756-756[BULt]	((((((((((.((((.((.....((((((.&.))))))-----)).))))-))))))))))	GGCUGCGGGUACAGGGUACUGGAAGGCCAC&UUGGCCU-----UAGCCUG-GCCUGUAGCC	3	98.052	3	0.121212	Output/R8h/cleaveLand_result/t_plot/PC-3p-100264_81_XM_016100348.2_761_TPlot.pdf	5	198.012	2	0.279403	Output/R0h/cleaveLand_result/t_plot/PC-3p-100264_81_XM_016100348.2_761_TPlot.pdf	98.052	198.012	-1.01397	down	6.2527e-09	1.20439e-08	yes	GO:0071704(organic substance metabolic process);GO:0044271(cellular nitrogen compound biosynthetic process);GO:1901360(organic cyclic compound metabolic process);GO:0044260(cellular macromolecule metabolic process);GO:0034654(nucleobase-containing compound biosynthetic process);GO:0008152(metabolic process);GO:0034641(cellular nitrogen compound metabolic process);GO:0009059(macromolecule biosynth…	ko03015(mRNA surveillance pathway);ko03018(RNA degradation);ko04120(Ubiquitin mediated proteolysis);ko00561(Glycerolipid metabolism);ko03013(RNA transport);ko01100(Metabolic pathways);ko04141(Protein processing in endoplasmic reticulum)
PC-3p-100264_81	XM_016112933.2	620	646	636	-52.3	-34.2	0.65392	12	3-7,644-640;10-13,636-633;14-20,630-624;22-24,622-620	1-2,646-645[UP5];8-9,639-637[AILt];x-x,632-631[BULt];21-21,623-623[SIL]	(((.(((((((..((((...(((((..&..)))))-..))))--))))))).)))	GGCCACAGGCCCCAGGCCCUAGGCCCC&UUGGCCU-UAGCCU--GGCCUGUAGCC	1	32.684	4	0.986489	Output/R8h/cleaveLand_result/t_plot/PC-3p-100264_81_XM_016112933.2_636_TPlot.pdf	0	0	NA	NA	NA	32.684	0	Inf	up	1.084e-08	1.2485e-08	yes	NA	NA
PC-3p-100264_81	XM_016113267.2	2913	2944	2935	-52.3	-35.8	0.684512	10.5	1-14,2944-2931;15-16,2928-2927;17-18,2925-2924;19-24,2918-2913	x-x,2930-2929[BULt];x-x,2926-2926[BULt];x-x,2923-2919[BULt]	((((((.....((.((..((((((((((((((&))))))))))))))--))-))-----))))))	GGCUAUGAAAUGGAGCAUCAGGCUGAGGCCAG&UUGGCCUUAGCCUG--GC-CU-----GUAGCC	0	0	NA	NA	NA	1	39.6024	4	0.72401	Output/R0h/cleaveLand_result/t_plot/PC-3p-100264_81_XM_016113267.2_2935_TPlot.pdf	0	39.6024	-Inf	down	3.1118e-10	6.0287e-10	yes	GO:0044238(primary metabolic process);GO:0044260(cellular macromolecule metabolic process);GO:0043231(intracellular membrane-bounded organelle);GO:0016311(dephosphorylation);GO:0043226(organelle);GO:0005622(intracellular);GO:0044267(cellular protein metabolic process);GO:0043412(macromolecule modification);GO:0005623(cell);GO:0004721(phosphoprotein phosphatase activity);GO:0003824(catalytic activ…	ko03013(RNA transport);ko03040(Spliceosome);ko03015(mRNA surveillance pathway)
PC-3p-100264_81	XM_016114588.2	476	499	490	-52.3	-34.6	0.661568	8.5	1-11,499-489;12-13,487-486;15-18,484-481;22-24,478-476	x-x,488-488[BULt];14-14,485-485[SIL];19-21,480-479[AILq]	(((..-((((.((.(((((((((((&)))))))))))-)).))))...)))	GGCGA-GGGCGGGCGUUAAGGCCAG&UUGGCCUUAGC-CUGGCCUGUAGCC	1	32.684	4	0.963333	Output/R8h/cleaveLand_result/t_plot/PC-3p-100264_81_XM_016114588.2_490_TPlot.pdf	0	0	NA	NA	NA	32.684	0	Inf	up	1.084e-08	1.2485e-08	yes	GO:0046395(carboxylic acid catabolic process);GO:0045548(phenylalanine ammonia-lyase activity);GO:0003824(catalytic activity);GO:0044424(intracellular part);GO:0016840(carbon-nitrogen lyase activity);GO:0009698(phenylpropanoid metabolic process);GO:0006807(nitrogen compound metabolic process);GO:0008152(metabolic process);GO:1901564(organonitrogen compound metabolic process);GO:0009063(cellular a…	ko01100(Metabolic pathways);ko00360(Phenylalanine metabolism);ko00940(Phenylpropanoid biosynthesis);ko01110(Biosynthesis of secondary metabolites)
PC-3p-100264_81	XM_016117981.2	481	505	495	-52.3	-34	0.650096	9	3-6,503-500;7-13,498-492;14-19,490-485;21-24,484-481	1-2,505-504[UP5];x-x,499-499[BULt];x-x,491-491[BULt];20-20,x-x[BULq]	((((-((((((.(((((((.((((..&..))))-)))))))-)))))).))))	GGUU-CGGGCCGAGGCUAACGGCUCC&UUGGCC-UUAGCCU-GGCCUGUAGCC	1	32.684	4	0.993646	Output/R8h/cleaveLand_result/t_plot/PC-3p-100264_81_XM_016117981.2_495_TPlot.pdf	0	0	NA	NA	NA	32.684	0	Inf	up	1.084e-08	1.2485e-08	yes	GO:0005488(binding);GO:0097159(organic cyclic compound binding);GO:1901363(heterocyclic compound binding)	ko03040(Spliceosome)
PC-3p-100264_81	XM_016117982.2	482	506	496	-52.3	-34	0.650096	9	3-6,504-501;7-13,499-493;14-19,491-486;21-24,485-482	1-2,506-505[UP5];x-x,500-500[BULt];x-x,492-492[BULt];20-20,x-x[BULq]	((((-((((((.(((((((.((((..&..))))-)))))))-)))))).))))	GGUU-CGGGCCGAGGCUAACGGCUCC&UUGGCC-UUAGCCU-GGCCUGUAGCC	1	32.684	4	0.993208	Output/R8h/cleaveLand_result/t_plot/PC-3p-100264_81_XM_016117982.2_496_TPlot.pdf	1	39.6024	4	0.984046	Output/R0h/cleaveLand_result/t_plot/PC-3p-100264_81_XM_016117982.2_496_TPlot.pdf	32.684	39.6024	-0.277003	down	0.4158	0.417305	yes	GO:0005488(binding);GO:0097159(organic cyclic compound binding);GO:1901363(heterocyclic compound binding)	ko03040(Spliceosome)
PC-3p-100264_81	XM_021127228.1	482	506	496	-52.3	-34	0.650096	9	3-6,504-501;7-13,499-493;14-19,491-486;21-24,485-482	1-2,506-505[UP5];x-x,500-500[BULt];x-x,492-492[BULt];20-20,x-x[BULq]	((((-((((((.(((((((.((((..&..))))-)))))))-)))))).))))	GGUU-CGGGCCGAGGCUAACGGCUCC&UUGGCC-UUAGCCU-GGCCUGUAGCC	0	0	NA	NA	NA	2	79.2048	2	0.714971	Output/R0h/cleaveLand_result/t_plot/PC-3p-100264_81_XM_021127228.1_496_TPlot.pdf	0	79.2048	-Inf	down	5.5905e-19	3.89431e-18	yes	GO:0005488(binding);GO:0097159(organic cyclic compound binding);GO:1901363(heterocyclic compound binding)	ko03040(Spliceosome)
PC-3p-101862_79	BGI_novel_T011691	1063	1086	1077	-45.4	-31.2	0.687225	8	1-1,1086-1086;3-4,1084-1083;6-15,1081-1072;18-24,1069-1063	2-2,1085-1085[SIL];5-5,1082-1082[SIL];16-17,1071-1070[SIL]	(((((((..((((((((((.((.(&).)).))))))))))..)))))))	GGGUGGAGGUGGGUGCAGUGGAGU&AGUCGACUGCACCUGAAUUCACCU	1	32.684	4	0.631538	Output/R8h/cleaveLand_result/t_plot/PC-3p-101862_79_BGI_novel_T011691_1077_TPlot.pdf	0	0	NA	NA	NA	32.684	0	Inf	up	1.084e-08	1.2485e-08	yes	NA	ko00860(Porphyrin and chlorophyll metabolism);ko00053(Ascorbate and aldarate metabolism);ko00040(Pentose and glucuronate interconversions);ko01110(Biosynthesis of secondary metabolites);ko01100(Metabolic pathways);ko00906(Carotenoid biosynthesis)
PC-3p-101862_79	XM_016078856.2	822	843	834	-45.4	-29.9	0.65859	5	2-13,842-831;15-18,829-826;21-24,825-822	1-1,843-843[UP5];14-14,830-830[SIL];19-20,x-x[BULq]	((((--((((.((((((((((((.&.)))))))))))).))))..))))	AGGU--AUUCUGGUGCAGUUGACA&AGUCGACUGCACCUGAAUUCACCU	1	32.684	4	0.83051	Output/R8h/cleaveLand_result/t_plot/PC-3p-101862_79_XM_016078856.2_834_TPlot.pdf	0	0	NA	NA	NA	32.684	0	Inf	up	1.084e-08	1.2485e-08	yes	GO:0005737(cytoplasm);GO:0016740(transferase activity);GO:0005623(cell);GO:0044444(cytoplasmic part);GO:0005982(starch metabolic process);GO:0044249(cellular biosynthetic process);GO:0043231(intracellular membrane-bounded organelle);GO:0009501(amyloplast);GO:0046527(glucosyltransferase activity);GO:0009507(chloroplast);GO:0009987(cellular process);GO:0009250(glucan biosynthetic process);GO:004442…	ko01110(Biosynthesis of secondary metabolites);ko00500(Starch and sucrose metabolism);ko01100(Metabolic pathways)
PC-3p-104925_76	XM_016089742.2	1478	1501	1492	-36.9	-24.9	0.674797	12.5	5-14,1497-1488;16-22,1486-1480	1-4,1501-1498[UP5];15-15,1487-1487[SIL];23-24,1479-1478[UP3]	..(((((((.((((((((((....&....)))))))))).)))))))..	UCGCUCAGGAACGGUCGAUUGCCG&AUGAAAUUGACUGUACCUGAGUUU	1	32.684	4	0.937549	Output/R8h/cleaveLand_result/t_plot/PC-3p-104925_76_XM_016089742.2_1492_TPlot.pdf	0	0	NA	NA	NA	32.684	0	Inf	up	1.084e-08	1.2485e-08	yes	NA	NA
PC-3p-104925_76	XM_016095988.2	1407	1430	1421	-36.9	-25.3	0.685637	16	8-24,1423-1407	1-7,1430-1424[UP5]	(((((((((((((((((.......&.......)))))))))))))))))	GGGCUCAGGUAUGGUCAGAGCUGG&AUGAAAUUGACUGUACCUGAGUUU	2	65.368	2	0.544288	Output/R8h/cleaveLand_result/t_plot/PC-3p-104925_76_XM_016095988.2_1421_TPlot.pdf	0	0	NA	NA	NA	65.368	0	Inf	up	6.2072e-16	2.71719e-15	yes	GO:0032774(RNA biosynthetic process);GO:0043231(intracellular membrane-bounded organelle);GO:0005849(mRNA cleavage factor complex);GO:0044422(organelle part);GO:0006351(transcription, DNA-templated);GO:0034641(cellular nitrogen compound metabolic process);GO:0006397(mRNA processing);GO:0043175(RNA polymerase core enzyme binding);GO:0005488(binding);GO:0044446(intracellular organelle part);GO:0043…	ko03015(mRNA surveillance pathway)
PC-3p-105086_75	XM_016088691.2	1028	1053	1043	-41.8	-27.2	0.650718	7	1-3,1053-1051;4-16,1049-1037;17-19,1035-1033;21-23,1031-1029	x-x,1050-1050[BULt];x-x,1036-1036[BULt];20-20,1032-1032[SIL];24-24,1028-1028[UP3]	.(((.(((.(((((((((((((.(((&)))-)))))))))))))-))).))).	UACUAAGGUUGUAGUUGACUUCAAUG&CGU-GAAGUCGACUACA-CCUAAGUU	0	0	NA	NA	NA	2	79.2048	2	0.225452	Output/R0h/cleaveLand_result/t_plot/PC-3p-105086_75_XM_016088691.2_1043_TPlot.pdf	0	79.2048	-Inf	down	5.5905e-19	3.89431e-18	yes	GO:0034641(cellular nitrogen compound metabolic process);GO:0046483(heterocycle metabolic process);GO:0006366(transcription from RNA polymerase II promoter);GO:0009058(biosynthetic process);GO:0006367(transcription initiation from RNA polymerase II promoter);GO:0003723(RNA binding);GO:0009059(macromolecule biosynthetic process);GO:1901576(organic substance biosynthetic process);GO:0003677(DNA bin…	ko03022(Basal transcription factors)
PC-3p-1060_9765	XM_016079474.2	1989	2009	2000	-37	-25.5	0.689189	8	1-5,2009-2005;7-8,2003-2002;10-19,2000-1991	6-6,2004-2004[SIL];9-9,2001-2001[SIL];20-21,1990-1989[UP3]	..((((((((((.((.(((((&))))).)).))))))))))..	UUGCUGUUCUUUGGAUGUAGG&CCUAUUUCGGAAGAACAGCCA	0	0	NA	NA	NA	1	39.6024	4	0.629584	Output/R0h/cleaveLand_result/t_plot/PC-3p-1060_9765_XM_016079474.2_2000_TPlot.pdf	0	39.6024	-Inf	down	3.1118e-10	6.0287e-10	yes	GO:0097367(carbohydrate derivative binding);GO:0031984(organelle subcompartment);GO:0016021(integral component of membrane);GO:0043229(intracellular organelle);GO:0044425(membrane part);GO:0043226(organelle);GO:1901265(nucleoside phosphate binding);GO:0005488(binding);GO:0031224(intrinsic component of membrane);GO:0055114(oxidation-reduction process);GO:0005622(intracellular);GO:0016653(oxidoredu…	NA
PC-3p-1060_9765	XM_016082100.2	414	442	425	-37	-26.1	0.705405	18.5	1-6,442-437;7-8,429-428;9-21,426-414	x-x,436-430[BULt];x-x,427-427[BULt]	(((((((((((((.((.......((((((&))))))-------))-)))))))))))))	UGGCUGUUUUUCCUGAAUCACUGGAUGGG&CCUAUU-------UC-GGAAGAACAGCCA	0	0	NA	NA	NA	1	39.6024	4	0.344921	Output/R0h/cleaveLand_result/t_plot/PC-3p-1060_9765_XM_016082100.2_425_TPlot.pdf	0	39.6024	-Inf	down	3.1118e-10	6.0287e-10	yes	NA	NA
PC-3p-1060_9765	XM_016087079.2	440	461	452	-37	-24.8	0.67027	9	1-4,461-458;7-13,455-449;15-19,446-442	5-6,457-456[SIL];14-14,448-447[AILt];20-21,441-440[UP3]	..(((((..(((((((..((((&))))..)))))))-.)))))..	CAGCUGUGGCUUCCGAUUUGGG&CCUAUUUCGGAAG-AACAGCCA	1	32.684	4	0.923747	Output/R8h/cleaveLand_result/t_plot/PC-3p-1060_9765_XM_016087079.2_452_TPlot.pdf	0	0	NA	NA	NA	32.684	0	Inf	up	1.084e-08	1.2485e-08	yes	GO:0016740(transferase activity);GO:0009987(cellular process);GO:0006644(phospholipid metabolic process);GO:0008152(metabolic process);GO:0090407(organophosphate biosynthetic process);GO:0006657(CDP-choline pathway);GO:1901576(organic substance biosynthetic process);GO:0006629(lipid metabolic process);GO:0019637(organophosphate metabolic process);GO:0003824(catalytic activity);GO:0046486(glycerol…	ko00564(Glycerophospholipid metabolism);ko01100(Metabolic pathways)
PC-3p-1060_9765	XM_016088364.2	2584	2604	2595	-37	-24.7	0.667568	8	1-2,2604-2603;5-14,2600-2591;16-20,2589-2585	3-4,2602-2601[SIL];15-15,2590-2590[SIL];21-21,2584-2584[UP3]	.(((((.((((((((((..((&))..)))))))))).))))).	AGGCUGAUCUUCUGGAAAUGG&CCUAUUUCGGAAGAACAGCCA	1	32.684	4	0.953197	Output/R8h/cleaveLand_result/t_plot/PC-3p-1060_9765_XM_016088364.2_2595_TPlot.pdf	0	0	NA	NA	NA	32.684	0	Inf	up	1.084e-08	1.2485e-08	yes	NA	NA
PC-3p-1060_9765	XM_016091536.2	1282	1303	1293	-37	-25	0.675676	8	1-4,1303-1300;6-18,1297-1285;20-20,1283-1283	5-5,1299-1298[AILt];19-19,1284-1284[SIL];21-21,1282-1282[UP3]	.(.(((((((((((((..((((&))))-.))))))))))))).).	AGCCUGUUCUUCCGGAUUUGGG&CCUA-UUUCGGAAGAACAGCCA	1	32.684	4	0.875765	Output/R8h/cleaveLand_result/t_plot/PC-3p-1060_9765_XM_016091536.2_1293_TPlot.pdf	0	0	NA	NA	NA	32.684	0	Inf	up	1.084e-08	1.2485e-08	yes	GO:0005623(cell);GO:0005622(intracellular);GO:0044464(cell part);GO:0044424(intracellular part)	NA
PC-3p-1060_9765	XM_016101782.2	488	511	501	-37	-25.78	0.696757	7	1-9,511-503;10-13,501-498;16-21,493-488	x-x,502-502[BULt];14-15,497-494[AILt]	((((((....((((.(((((((((&)))))))))-))))--..))))))	UGGCUGGCGGCUUCUUGAAAUAGG&CCUAUUUCG-GAAG--AACAGCCA	2	65.368	3	0.0838736	Output/R8h/cleaveLand_result/t_plot/PC-3p-1060_9765_XM_016101782.2_501_TPlot.pdf	2	79.2048	3	0.0548494	Output/R0h/cleaveLand_result/t_plot/PC-3p-1060_9765_XM_016101782.2_501_TPlot.pdf	65.368	79.2048	-0.277003	down	0.24981	0.262584	yes	NA	NA
PC-3p-1060_9765	XM_016102697.2	455	475	466	-37	-25.3	0.683784	7	3-19,473-457	1-2,475-474[UP5];20-21,456-455[UP3]	..(((((((((((((((((..&..)))))))))))))))))..	AUGCUGUUCUUCUGAAAUGUU&CCUAUUUCGGAAGAACAGCCA	0	0	NA	NA	NA	3	118.807	2	0.30688	Output/R0h/cleaveLand_result/t_plot/PC-3p-1060_9765_XM_016102697.2_466_TPlot.pdf	0	118.807	-Inf	down	1.1501e-27	2.01922e-26	yes	NA	ko00511(Other glycan degradation)
PC-3p-1060_9765	XM_016102850.2	1199	1221	1212	-37	-24.9	0.672973	5.5	2-17,1220-1205;18-20,1202-1200	1-1,1221-1221[UP5];x-x,1204-1203[BULt];21-21,1199-1199[UP3]	.(((..((((((((((((((((.&.))))))))))))))))--))).	AGGCCCUGUUUUUCUGAAAUAGA&CCUAUUUCGGAAGAACA--GCCA	1	32.684	4	0.914801	Output/R8h/cleaveLand_result/t_plot/PC-3p-1060_9765_XM_016102850.2_1212_TPlot.pdf	1	39.6024	4	0.870158	Output/R0h/cleaveLand_result/t_plot/PC-3p-1060_9765_XM_016102850.2_1212_TPlot.pdf	32.684	39.6024	-0.277003	down	0.4158	0.417305	yes	GO:0006807(nitrogen compound metabolic process);GO:0030554(adenyl nucleotide binding);GO:0008152(metabolic process);GO:0016773(phosphotransferase activity, alcohol group as acceptor);GO:0043167(ion binding);GO:0071704(organic substance metabolic process);GO:0032559(adenyl ribonucleotide binding);GO:1901564(organonitrogen compound metabolic process);GO:0044260(cellular macromolecule metabolic proc…	ko03008(Ribosome biogenesis in eukaryotes)
PC-3p-1060_9765	XM_016107234.2	196	219	206	-37	-24.18	0.653514	13	1-8,219-212;10-14,206-202;16-21,201-196	9-9,211-207[AILt];15-15,x-x[BULq]	((((((-(((((.....((((((((&))))))))----.))))).))))))	UGGCUG-UCUUCAUGGGGAGAUGGG&CCUAUUUC----GGAAGAACAGCCA	0	0	NA	NA	NA	1	39.6024	4	0.982185	Output/R0h/cleaveLand_result/t_plot/PC-3p-1060_9765_XM_016107234.2_206_TPlot.pdf	0	39.6024	-Inf	down	3.1118e-10	6.0287e-10	yes	NA	ko04626(Plant-pathogen interaction)
PC-3p-1060_9765	XM_021139545.1	475	495	486	-37	-25.3	0.683784	7	3-19,493-477	1-2,495-494[UP5];20-21,476-475[UP3]	..(((((((((((((((((..&..)))))))))))))))))..	AUGCUGUUCUUCUGAAAUGUU&CCUAUUUCGGAAGAACAGCCA	0	0	NA	NA	NA	1	39.6024	4	0.680264	Output/R0h/cleaveLand_result/t_plot/PC-3p-1060_9765_XM_021139545.1_486_TPlot.pdf	0	39.6024	-Inf	down	3.1118e-10	6.0287e-10	yes	NA	ko00511(Other glycan degradation)
PC-3p-1060_9765	XM_021139724.1	821	843	834	-37	-24.9	0.672973	5.5	2-17,842-827;18-20,824-822	1-1,843-843[UP5];x-x,826-825[BULt];21-21,821-821[UP3]	.(((..((((((((((((((((.&.))))))))))))))))--))).	AGGCCCUGUUUUUCUGAAAUAGA&CCUAUUUCGGAAGAACA--GCCA	0	0	NA	NA	NA	1	39.6024	4	0.867747	Output/R0h/cleaveLand_result/t_plot/PC-3p-1060_9765_XM_021139724.1_834_TPlot.pdf	0	39.6024	-Inf	down	3.1118e-10	6.0287e-10	yes	GO:0006807(nitrogen compound metabolic process);GO:0030554(adenyl nucleotide binding);GO:0008152(metabolic process);GO:0016773(phosphotransferase activity, alcohol group as acceptor);GO:0043167(ion binding);GO:0071704(organic substance metabolic process);GO:0032559(adenyl ribonucleotide binding);GO:1901564(organonitrogen compound metabolic process);GO:0044260(cellular macromolecule metabolic proc…	ko03008(Ribosome biogenesis in eukaryotes)
PC-3p-107728_73	XM_016082672.2	616	637	630	-47.1	-30.8	0.653928	12.5	4-7,634-631;10-23,630-617	1-3,637-635[UP5];8-9,x-x[BULq];24-24,616-616[UP3]	.((((((((((((((--((((...&...))))..)))))))))))))).	GUCGGGUGCAGCGGC--CGUGGUU&UCACAUGAAGUCGCUGCACCUGAG	0	0	NA	NA	NA	1	39.6024	4	0.805403	Output/R0h/cleaveLand_result/t_plot/PC-3p-107728_73_XM_016082672.2_630_TPlot.pdf	0	39.6024	-Inf	down	3.1118e-10	6.0287e-10	yes	GO:0016829(lyase activity);GO:0016836(hydro-lyase activity);GO:0008152(metabolic process);GO:0016835(carbon-oxygen lyase activity);GO:0003824(catalytic activity)	ko01110(Biosynthesis of secondary metabolites);ko01210(2-Oxocarboxylic acid metabolism);ko01100(Metabolic pathways);ko01230(Biosynthesis of amino acids);ko00660(C5-Branched dibasic acid metabolism);ko00290(Valine, leucine and isoleucine biosynthesis)
PC-3p-107728_73	XM_021132348.1	622	643	636	-47.1	-30.8	0.653928	12.5	4-7,640-637;10-23,636-623	1-3,643-641[UP5];8-9,x-x[BULq];24-24,622-622[UP3]	.((((((((((((((--((((...&...))))..)))))))))))))).	GUCGGGUGCAGCGGC--CGUGGUU&UCACAUGAAGUCGCUGCACCUGAG	1	32.684	4	0.837867	Output/R8h/cleaveLand_result/t_plot/PC-3p-107728_73_XM_021132348.1_636_TPlot.pdf	0	0	NA	NA	NA	32.684	0	Inf	up	1.084e-08	1.2485e-08	yes	GO:0016829(lyase activity);GO:0016836(hydro-lyase activity);GO:0008152(metabolic process);GO:0016835(carbon-oxygen lyase activity);GO:0003824(catalytic activity)	ko01110(Biosynthesis of secondary metabolites);ko01210(2-Oxocarboxylic acid metabolism);ko01100(Metabolic pathways);ko01230(Biosynthesis of amino acids);ko00660(C5-Branched dibasic acid metabolism);ko00290(Valine, leucine and isoleucine biosynthesis)
PC-3p-107728_73	XM_021132349.1	622	643	636	-47.1	-30.8	0.653928	12.5	4-7,640-637;10-23,636-623	1-3,643-641[UP5];8-9,x-x[BULq];24-24,622-622[UP3]	.((((((((((((((--((((...&...))))..)))))))))))))).	GUCGGGUGCAGCGGC--CGUGGUU&UCACAUGAAGUCGCUGCACCUGAG	2	65.368	2	0.482453	Output/R8h/cleaveLand_result/t_plot/PC-3p-107728_73_XM_021132349.1_636_TPlot.pdf	0	0	NA	NA	NA	65.368	0	Inf	up	6.2072e-16	2.71719e-15	yes	GO:0016829(lyase activity);GO:0016836(hydro-lyase activity);GO:0008152(metabolic process);GO:0016835(carbon-oxygen lyase activity);GO:0003824(catalytic activity)	ko01110(Biosynthesis of secondary metabolites);ko01210(2-Oxocarboxylic acid metabolism);ko01100(Metabolic pathways);ko01230(Biosynthesis of amino acids);ko00660(C5-Branched dibasic acid metabolism);ko00290(Valine, leucine and isoleucine biosynthesis)
PC-3p-108384_72	XM_016082672.2	612	635	627	-45.2	-33.7	0.745575	9	2-9,634-627;11-20,626-617;21-22,615-614	1-1,635-635[UP5];10-10,x-x[BULq];x-x,616-616[BULt];23-24,613-612[UP3]	..((.((((((((((-((((((((.&.)))))))).))))))))))-))..	GCGCGUCGGGUGCAG-CGGCCGUGG&ACAUGGUCGACUGCACCUGA-GUUU	1	32.684	4	0.372447	Output/R8h/cleaveLand_result/t_plot/PC-3p-108384_72_XM_016082672.2_627_TPlot.pdf	0	0	NA	NA	NA	32.684	0	Inf	up	1.084e-08	1.2485e-08	yes	GO:0016829(lyase activity);GO:0016836(hydro-lyase activity);GO:0008152(metabolic process);GO:0016835(carbon-oxygen lyase activity);GO:0003824(catalytic activity)	ko01110(Biosynthesis of secondary metabolites);ko01210(2-Oxocarboxylic acid metabolism);ko01100(Metabolic pathways);ko01230(Biosynthesis of amino acids);ko00660(C5-Branched dibasic acid metabolism);ko00290(Valine, leucine and isoleucine biosynthesis)
PC-3p-108384_72	XM_016082917.2	1369	1393	1384	-45.2	-31.6	0.699115	8	2-10,1392-1384;11-19,1382-1374;21-22,1372-1371	1-1,1393-1393[UP5];x-x,1383-1383[BULt];20-20,1373-1373[SIL];23-24,1370-1369[UP3]	..((.(((((((((.(((((((((.&.)))))))))-))))))))).))..	UUACACAGGUGCAGCUUGACCGUGC&ACAUGGUCGA-CUGCACCUGAGUUU	1	32.684	4	0.519137	Output/R8h/cleaveLand_result/t_plot/PC-3p-108384_72_XM_016082917.2_1384_TPlot.pdf	0	0	NA	NA	NA	32.684	0	Inf	up	1.084e-08	1.2485e-08	yes	GO:0008152(metabolic process);GO:0031966(mitochondrial membrane);GO:0044429(mitochondrial part);GO:0044260(cellular macromolecule metabolic process);GO:0044464(cell part);GO:0071704(organic substance metabolic process);GO:0015833(peptide transport);GO:0005488(binding);GO:0006627(protein processing involved in protein targeting to mitochondrion);GO:0007005(mitochondrion organization);GO:0046907(in…	NA
PC-3p-108384_72	XM_016106127.2	916	938	930	-45.2	-29.4	0.650442	10.5	2-6,937-933;8-8,932-932;11-24,929-916	1-1,938-938[UP5];7-7,x-x[BULq];9-10,931-930[SIL]	((((((((((((((..(-(((((.&.))))).)..))))))))))))))	GAACUCGGGUGUGGGAG-CUAUGG&ACAUGGUCGACUGCACCUGAGUUU	1	32.684	4	0.920287	Output/R8h/cleaveLand_result/t_plot/PC-3p-108384_72_XM_016106127.2_930_TPlot.pdf	0	0	NA	NA	NA	32.684	0	Inf	up	1.084e-08	1.2485e-08	yes	GO:0070011(peptidase activity, acting on L-amino acid peptides);GO:0004252(serine-type endopeptidase activity);GO:0008152(metabolic process);GO:0019538(protein metabolic process);GO:1901564(organonitrogen compound metabolic process);GO:0004175(endopeptidase activity);GO:0006508(proteolysis);GO:0006807(nitrogen compound metabolic process);GO:0003824(catalytic activity);GO:0008233(peptidase activit…	NA
PC-3p-108384_72	XM_021132348.1	618	641	633	-45.2	-33.7	0.745575	9	2-9,640-633;11-20,632-623;21-22,621-620	1-1,641-641[UP5];10-10,x-x[BULq];x-x,622-622[BULt];23-24,619-618[UP3]	..((.((((((((((-((((((((.&.)))))))).))))))))))-))..	GCGCGUCGGGUGCAG-CGGCCGUGG&ACAUGGUCGACUGCACCUGA-GUUU	1	32.684	4	0.358368	Output/R8h/cleaveLand_result/t_plot/PC-3p-108384_72_XM_021132348.1_633_TPlot.pdf	0	0	NA	NA	NA	32.684	0	Inf	up	1.084e-08	1.2485e-08	yes	GO:0016829(lyase activity);GO:0016836(hydro-lyase activity);GO:0008152(metabolic process);GO:0016835(carbon-oxygen lyase activity);GO:0003824(catalytic activity)	ko01110(Biosynthesis of secondary metabolites);ko01210(2-Oxocarboxylic acid metabolism);ko01100(Metabolic pathways);ko01230(Biosynthesis of amino acids);ko00660(C5-Branched dibasic acid metabolism);ko00290(Valine, leucine and isoleucine biosynthesis)
PC-3p-108384_72	XM_021132349.1	618	641	633	-45.2	-33.7	0.745575	9	2-9,640-633;11-20,632-623;21-22,621-620	1-1,641-641[UP5];10-10,x-x[BULq];x-x,622-622[BULt];23-24,619-618[UP3]	..((.((((((((((-((((((((.&.)))))))).))))))))))-))..	GCGCGUCGGGUGCAG-CGGCCGUGG&ACAUGGUCGACUGCACCUGA-GUUU	2	65.368	2	0.126044	Output/R8h/cleaveLand_result/t_plot/PC-3p-108384_72_XM_021132349.1_633_TPlot.pdf	0	0	NA	NA	NA	65.368	0	Inf	up	6.2072e-16	2.71719e-15	yes	GO:0016829(lyase activity);GO:0016836(hydro-lyase activity);GO:0008152(metabolic process);GO:0016835(carbon-oxygen lyase activity);GO:0003824(catalytic activity)	ko01110(Biosynthesis of secondary metabolites);ko01210(2-Oxocarboxylic acid metabolism);ko01100(Metabolic pathways);ko01230(Biosynthesis of amino acids);ko00660(C5-Branched dibasic acid metabolism);ko00290(Valine, leucine and isoleucine biosynthesis)
PC-3p-110122_70	BGI_novel_T001319	3358	3384	3370	-32.1	-21.8	0.679128	16.5	1-5,3384-3380;6-17,3374-3363;19-21,3361-3359	x-x,3379-3375[BULt];18-18,3362-3362[SIL];22-22,3358-3358[UP3]	.(((.((((((((((((.....(((((&)))))-----)))))))))))).))).	CGGCCAAGUUGGCGAGAUGGAAGUCCU&AGGAU-----UCUUGUUAACUUUGCUU	3	98.052	2	0.988186	Output/R8h/cleaveLand_result/t_plot/PC-3p-110122_70_BGI_novel_T001319_3370_TPlot.pdf	0	0	NA	NA	NA	98.052	0	Inf	up	4.0654e-23	4.95325e-22	yes	GO:0032555(purine ribonucleotide binding);GO:0017076(purine nucleotide binding);GO:0005319(lipid transporter activity);GO:0016192(vesicle-mediated transport);GO:0004012(phospholipid-translocating ATPase activity);GO:0048194(Golgi vesicle budding);GO:0005622(intracellular);GO:0005623(cell);GO:0036094(small molecule binding);GO:0035639(purine ribonucleoside triphosphate binding);GO:0046872(metal io…	NA
PC-3p-110122_70	BGI_novel_T001367	1556	1582	1573	-32.1	-24.8	0.772586	13.5	2-10,1581-1573;11-22,1567-1556	1-1,1582-1582[UP5];x-x,1572-1568[BULt]	((((((((((((.....(((((((((.&.)))))))))-----))))))))))))	AGGCAAAGUUGAGGGCUCAAGGAUCCC&AGGAUUCUUG-----UUAACUUUGCUU	0	0	NA	NA	NA	1	39.6024	4	0.554793	Output/R0h/cleaveLand_result/t_plot/PC-3p-110122_70_BGI_novel_T001367_1573_TPlot.pdf	0	39.6024	-Inf	down	3.1118e-10	6.0287e-10	yes	NA	ko03015(mRNA surveillance pathway)
PC-3p-110122_70	BGI_novel_T003525	1802	1823	1814	-32.1	-27.6	0.859813	4	1-2,1823-1822;4-22,1820-1802	3-3,1821-1821[SIL]	(((((((((((((((((((.((&)).)))))))))))))))))))	GAGUAAAGUUGACAAGAAUGCU&AGGAUUCUUGUUAACUUUGCUU	1	32.684	4	0.216557	Output/R8h/cleaveLand_result/t_plot/PC-3p-110122_70_BGI_novel_T003525_1814_TPlot.pdf	0	0	NA	NA	NA	32.684	0	Inf	up	1.084e-08	1.2485e-08	yes	GO:0003677(DNA binding);GO:0043232(intracellular non-membrane-bounded organelle);GO:0005524(ATP binding);GO:0097159(organic cyclic compound binding);GO:0004003(ATP-dependent DNA helicase activity);GO:0043140(ATP-dependent 3'-5' DNA helicase activity);GO:0006139(nucleobase-containing compound metabolic process);GO:0035639(purine ribonucleoside triphosphate binding);GO:0043170(macromolecule metabol…	ko03440(Homologous recombination)
PC-3p-110122_70	BGI_novel_T004138	2156	2179	2170	-32.1	-21.1	0.657321	9.5	2-14,2178-2166;15-17,2164-2162;19-21,2159-2157	1-1,2179-2179[UP5];x-x,2165-2165[BULt];18-18,2161-2160[AILt];22-22,2156-2156[UP3]	.(((..(((.(((((((((((((.&.)))))))))))))-)))-.))).	UAGCUUAGGUUUGGCAGGAGUCCC&AGGAUUCUUGUUAA-CUU-UGCUU	0	0	NA	NA	NA	1	39.6024	4	1	Output/R0h/cleaveLand_result/t_plot/PC-3p-110122_70_BGI_novel_T004138_2170_TPlot.pdf	0	39.6024	-Inf	down	3.1118e-10	6.0287e-10	yes	GO:0051179(localization);GO:0008324(cation transmembrane transporter activity);GO:0005623(cell);GO:0006811(ion transport);GO:0015672(monovalent inorganic cation transport);GO:0015293(symporter activity);GO:0005355(glucose transmembrane transporter activity);GO:0044459(plasma membrane part);GO:0071944(cell periphery);GO:0071702(organic substance transport);GO:0015075(ion transmembrane transporter …	ko00190(Oxidative phosphorylation);ko00500(Starch and sucrose metabolism);ko01100(Metabolic pathways)
PC-3p-110122_70	BGI_novel_T006260	889	911	901	-32.1	-21.6	0.672897	11	2-3,910-909;4-9,907-902;11-20,900-891	1-1,911-911[UP5];x-x,908-908[BULt];10-10,901-901[SIL];21-22,890-889[UP3]	..((((((((((.((((((.((.&.))-)))))).))))))))))..	AUGCAAAGUUGAGGAGAGUACUA&AGG-AUUCUUGUUAACUUUGCUU	1	32.684	4	1	Output/R8h/cleaveLand_result/t_plot/PC-3p-110122_70_BGI_novel_T006260_901_TPlot.pdf	0	0	NA	NA	NA	32.684	0	Inf	up	1.084e-08	1.2485e-08	yes	GO:0044238(primary metabolic process);GO:0016311(dephosphorylation);GO:0046488(phosphatidylinositol metabolic process);GO:0003824(catalytic activity);GO:0046839(phospholipid dephosphorylation);GO:0009987(cellular process);GO:0030258(lipid modification);GO:0006650(glycerophospholipid metabolic process);GO:0016787(hydrolase activity);GO:0046856(phosphatidylinositol dephosphorylation);GO:0008152(met…	ko01100(Metabolic pathways);ko00562(Inositol phosphate metabolism);ko04070(Phosphatidylinositol signaling system)
PC-3p-110122_70	BGI_novel_T012465	1434	1457	1448	-32.1	-22	0.685358	9	1-12,1457-1446;15-18,1443-1440;19-21,1437-1435	13-14,1445-1444[SIL];x-x,1439-1438[BULt];22-22,1434-1434[UP3]	.(((..((((..((((((((((((&))))))))))))..))))--))).	CAGCCUGGAGGCGGCAGGAAUCCU&AGGAUUCUUGUUAACUUU--GCUU	1	32.684	4	0.999976	Output/R8h/cleaveLand_result/t_plot/PC-3p-110122_70_BGI_novel_T012465_1448_TPlot.pdf	0	0	NA	NA	NA	32.684	0	Inf	up	1.084e-08	1.2485e-08	yes	GO:0016020(membrane);GO:0051234(establishment of localization);GO:0044425(membrane part);GO:0055085(transmembrane transport);GO:0051179(localization);GO:0006810(transport);GO:0031224(intrinsic component of membrane);GO:0016021(integral component of membrane)	NA
PC-3p-110122_70	BGI_novel_T012512	1587	1609	1600	-32.1	-23.2	0.722741	4.5	1-14,1609-1596;15-22,1594-1587	x-x,1595-1595[BULt]	((((((((.((((((((((((((&))))))))))))))-))))))))	AAGCAAGGAUUAACAAGGAUUUU&AGGAUUCUUGUUAA-CUUUGCUU	0	0	NA	NA	NA	3	118.807	2	0.663296	Output/R0h/cleaveLand_result/t_plot/PC-3p-110122_70_BGI_novel_T012512_1600_TPlot.pdf	0	118.807	-Inf	down	1.1501e-27	2.01922e-26	yes	GO:0006518(peptide metabolic process);GO:0016875(ligase activity, forming carbon-oxygen bonds);GO:0043043(peptide biosynthetic process);GO:0036094(small molecule binding);GO:0044249(cellular biosynthetic process);GO:0043168(anion binding);GO:0009058(biosynthetic process);GO:0043038(amino acid activation);GO:0044281(small molecule metabolic process);GO:1901576(organic substance biosynthetic proces…	ko00970(Aminoacyl-tRNA biosynthesis)
PC-3p-110122_70	BGI_novel_T013110	325	346	337	-32.1	-23.48	0.731464	8	2-11,345-336;15-21,332-326	1-1,346-346[UP5];12-14,335-333[SIL];22-22,325-325[UP3]	.(((((((...((((((((((.&.))))))))))...))))))).	CAGCAAAGCUUGCGAGAAUCCC&AGGAUUCUUGUUAACUUUGCUU	0	0	NA	NA	NA	1	39.6024	4	0.951904	Output/R0h/cleaveLand_result/t_plot/PC-3p-110122_70_BGI_novel_T013110_337_TPlot.pdf	0	39.6024	-Inf	down	3.1118e-10	6.0287e-10	yes	GO:0006605(protein targeting);GO:0015031(protein transport);GO:0044464(cell part);GO:0005488(binding);GO:0006613(cotranslational protein targeting to membrane);GO:0051649(establishment of localization in cell);GO:0071705(nitrogen compound transport);GO:0072594(establishment of protein localization to organelle);GO:0006810(transport);GO:0005622(intracellular);GO:0006612(protein targeting to membra…	ko03060(Protein export)
PC-3p-110122_70	XM_016076143.2	699	721	711	-32.1	-21.7	0.676012	11.5	2-4,720-718;6-20,715-701	1-1,721-721[UP5];5-5,717-716[AILt];21-22,700-699[UP3]	..(((((((((((((((..(((.&.)))-.)))))))))))))))..	AUGCAGAGUUGACAGGGCUUUCG&AGGA-UUCUUGUUAACUUUGCUU	0	0	NA	NA	NA	1	39.6024	4	0.999994	Output/R0h/cleaveLand_result/t_plot/PC-3p-110122_70_XM_016076143.2_711_TPlot.pdf	0	39.6024	-Inf	down	3.1118e-10	6.0287e-10	yes	GO:0016787(hydrolase activity);GO:0003824(catalytic activity)	NA
PC-3p-110122_70	XM_016078998.1	1566	1588	1579	-32.1	-21.3	0.663551	8	1-2,1588-1587;5-15,1584-1574;16-22,1572-1566	3-4,1586-1585[SIL];x-x,1573-1573[BULt]	(((((((.(((((((((((..((&))..)))))))))))-)))))))	AAGCAGGUGUUGACAAGAGAACU&AGGAUUCUUGUUAAC-UUUGCUU	1	32.684	4	1	Output/R8h/cleaveLand_result/t_plot/PC-3p-110122_70_XM_016078998.1_1579_TPlot.pdf	0	0	NA	NA	NA	32.684	0	Inf	up	1.084e-08	1.2485e-08	yes	GO:0051179(localization);GO:0022406(membrane docking);GO:0006810(transport);GO:0051640(organelle localization);GO:0051641(cellular localization);GO:0032940(secretion by cell);GO:0051234(establishment of localization);GO:0048278(vesicle docking);GO:0009987(cellular process);GO:0140056(organelle localization by membrane tethering);GO:0006904(vesicle docking involved in exocytosis);GO:0046903(secret…	ko04144(Endocytosis)
PC-3p-110122_70	XM_016079227.2	1805	1825	1817	-32.1	-21.2	0.660436	10	2-3,1824-1823;5-9,1822-1818;11-22,1816-1805	1-1,1825-1825[UP5];4-4,x-x[BULq];10-10,1817-1817[SIL]	((((((((((((.(((((-((.&.)).))))).))))))))))))	AGGCAAGGUUGAGGAGAG-CUG&AGGAUUCUUGUUAACUUUGCUU	0	0	NA	NA	NA	2	79.2048	3	0.739197	Output/R0h/cleaveLand_result/t_plot/PC-3p-110122_70_XM_016079227.2_1817_TPlot.pdf	0	79.2048	-Inf	down	5.5905e-19	3.89431e-18	yes	GO:0005623(cell);GO:0065007(biological regulation);GO:0050789(regulation of biological process);GO:0009987(cellular process);GO:0065008(regulation of biological quality);GO:0050794(regulation of cellular process);GO:0042592(homeostatic process);GO:0019725(cellular homeostasis);GO:0045454(cell redox homeostasis)	NA
PC-3p-110122_70	XM_016079967.2	1016	1037	1028	-32.1	-22.3	0.694704	9.5	3-9,1035-1029;11-21,1027-1017	1-2,1037-1036[UP5];10-10,1028-1028[SIL];22-22,1016-1016[UP3]	.(((((((((((.(((((((..&..))))))).))))))))))).	CAGUAGGGUUAGGGAGAAUCGC&AGGAUUCUUGUUAACUUUGCUU	6	196.104	2	0.950652	Output/R8h/cleaveLand_result/t_plot/PC-3p-110122_70_XM_016079967.2_1028_TPlot.pdf	1	39.6024	4	0.999385	Output/R0h/cleaveLand_result/t_plot/PC-3p-110122_70_XM_016079967.2_1028_TPlot.pdf	196.104	39.6024	2.30796	up	2.1018e-24	3.51295e-23	yes	GO:0008270(zinc ion binding);GO:0019538(protein metabolic process);GO:0032446(protein modification by small protein conjugation);GO:0046872(metal ion binding);GO:0061659(ubiquitin-like protein ligase activity);GO:1901564(organonitrogen compound metabolic process);GO:0043632(modification-dependent macromolecule catabolic process);GO:0044257(cellular protein catabolic process);GO:0042787(protein ub…	NA
PC-3p-110122_70	XM_016080200.2	370	390	382	-32.1	-21.3	0.663551	9	2-3,389-388;5-11,387-381;13-21,379-371	1-1,390-390[UP5];4-4,x-x[BULq];12-12,380-380[SIL];22-22,370-370[UP3]	.(((((((((.(((((((-((.&.)).))))))).))))))))).	UGGCAAGGUUUACAAGGG-CCA&AGGAUUCUUGUUAACUUUGCUU	0	0	NA	NA	NA	1	39.6024	4	1	Output/R0h/cleaveLand_result/t_plot/PC-3p-110122_70_XM_016080200.2_382_TPlot.pdf	0	39.6024	-Inf	down	3.1118e-10	6.0287e-10	yes	GO:0006468(protein phosphorylation);GO:0032553(ribonucleotide binding);GO:0009987(cellular process);GO:0097159(organic cyclic compound binding);GO:0043167(ion binding);GO:0019538(protein metabolic process);GO:0018193(peptidyl-amino acid modification);GO:0043168(anion binding);GO:0000166(nucleotide binding);GO:0032555(purine ribonucleotide binding);GO:0016772(transferase activity, transferring pho…	NA
PC-3p-110122_70	XM_016080239.2	1999	2020	2011	-32.1	-21.6	0.672897	9.5	3-22,2018-1999	1-2,2020-2019[UP5]	((((((((((((((((((((..&..))))))))))))))))))))	AGGUGGGGUUAGCAAGGGUUGC&AGGAUUCUUGUUAACUUUGCUU	0	0	NA	NA	NA	1	39.6024	4	0.999997	Output/R0h/cleaveLand_result/t_plot/PC-3p-110122_70_XM_016080239.2_2011_TPlot.pdf	0	39.6024	-Inf	down	3.1118e-10	6.0287e-10	yes	GO:0044464(cell part);GO:0043227(membrane-bounded organelle);GO:0043229(intracellular organelle);GO:0044424(intracellular part);GO:0005545(1-phosphatidylinositol binding);GO:0005543(phospholipid binding);GO:0043168(anion binding);GO:0043623(cellular protein complex assembly);GO:0097708(intracellular vesicle);GO:0070271(protein complex biogenesis);GO:0016043(cellular component organization);GO:006…	NA
PC-3p-110122_70	XM_016080239.2	557	577	568	-32.1	-22.4	0.697819	8.5	1-12,577-566;15-20,564-559	13-14,565-565[AILq];21-22,558-557[UP3]	..((((((.-((((((((((((&))))))))))))..))))))..	ACGCAGAGG-GAUGAGGAUCCU&AGGAUUCUUGUUAACUUUGCUU	2	65.368	2	0.938689	Output/R8h/cleaveLand_result/t_plot/PC-3p-110122_70_XM_016080239.2_568_TPlot.pdf	0	0	NA	NA	NA	65.368	0	Inf	up	6.2072e-16	2.71719e-15	yes	GO:0044464(cell part);GO:0043227(membrane-bounded organelle);GO:0043229(intracellular organelle);GO:0044424(intracellular part);GO:0005545(1-phosphatidylinositol binding);GO:0005543(phospholipid binding);GO:0043168(anion binding);GO:0043623(cellular protein complex assembly);GO:0097708(intracellular vesicle);GO:0070271(protein complex biogenesis);GO:0016043(cellular component organization);GO:006…	NA
PC-3p-110122_70	XM_016081021.2	548	569	561	-32.1	-20.9	0.65109	9	2-5,568-565;7-12,564-559;13-21,557-549	1-1,569-569[UP5];6-6,x-x[BULq];x-x,558-558[BULt];22-22,548-548[UP3]	.(((((((((.((((((-((((.&.)))).))))))-))))))))).	UGGUAAAGUUGGACGAG-AUCCA&AGGAUUCUUGUU-AACUUUGCUU	0	0	NA	NA	NA	2	79.2048	2	0.998908	Output/R0h/cleaveLand_result/t_plot/PC-3p-110122_70_XM_016081021.2_561_TPlot.pdf	0	79.2048	-Inf	down	5.5905e-19	3.89431e-18	yes	NA	NA
PC-3p-110122_70	XM_016081466.2	234	254	245	-32.1	-22.4	0.697819	8	2-13,253-242;15-21,241-235	1-1,254-254[UP5];14-14,x-x[BULq];22-22,234-234[UP3]	.(((((((-((((((((((((.&.)))))))))))).))))))).	UGGCAGAG-UGAUAGGAAUCUC&AGGAUUCUUGUUAACUUUGCUU	1	32.684	4	0.999728	Output/R8h/cleaveLand_result/t_plot/PC-3p-110122_70_XM_016081466.2_245_TPlot.pdf	1	39.6024	4	0.998892	Output/R0h/cleaveLand_result/t_plot/PC-3p-110122_70_XM_016081466.2_245_TPlot.pdf	32.684	39.6024	-0.277003	down	0.4158	0.417305	yes	GO:0004659(prenyltransferase activity);GO:0043227(membrane-bounded organelle);GO:0009507(chloroplast);GO:0005737(cytoplasm);GO:0043229(intracellular organelle);GO:0003824(catalytic activity);GO:0005623(cell);GO:0044424(intracellular part);GO:0044444(cytoplasmic part);GO:0016765(transferase activity, transferring alkyl or aryl (other than methyl) groups);GO:0009536(plastid);GO:0005622(intracellula…	ko01110(Biosynthesis of secondary metabolites);ko00130(Ubiquinone and other terpenoid-quinone biosynthesis);ko01100(Metabolic pathways)
PC-3p-110122_70	XM_016081532.2	1302	1325	1316	-32.1	-21.6	0.672897	8	2-10,1324-1316;11-19,1313-1305	1-1,1325-1325[UP5];x-x,1315-1314[BULt];20-22,1304-1302[UP3]	...(((((((((..(((((((((.&.)))))))))--)))))))))...	UAACAAAGUUAAGUCAAGAAUCCG&AGGAUUCUUG--UUAACUUUGCUU	0	0	NA	NA	NA	1	39.6024	4	0.999998	Output/R0h/cleaveLand_result/t_plot/PC-3p-110122_70_XM_016081532.2_1316_TPlot.pdf	0	39.6024	-Inf	down	3.1118e-10	6.0287e-10	yes	GO:0016772(transferase activity, transferring phosphorus-containing groups);GO:0050789(regulation of biological process);GO:0005488(binding);GO:0031326(regulation of cellular biosynthetic process);GO:2000112(regulation of cellular macromolecule biosynthetic process);GO:0010468(regulation of gene expression);GO:0005524(ATP binding);GO:0036211(protein modification process);GO:0044260(cellular macro…	ko04075(Plant hormone signal transduction);ko04016(MAPK signaling pathway - plant)
PC-3p-110122_70	XM_016081818.2	145	166	157	-32.1	-21.1	0.657321	8.5	2-4,165-163;6-21,161-146	1-1,166-166[UP5];5-5,162-162[SIL];22-22,145-145[UP3]	.((((((((((((((((.(((.&.))).)))))))))))))))).	CAGUGGAGUUAAUGGGAUUCCC&AGGAUUCUUGUUAACUUUGCUU	1	32.684	4	1	Output/R8h/cleaveLand_result/t_plot/PC-3p-110122_70_XM_016081818.2_157_TPlot.pdf	0	0	NA	NA	NA	32.684	0	Inf	up	1.084e-08	1.2485e-08	yes	NA	ko04016(MAPK signaling pathway - plant);ko04626(Plant-pathogen interaction)
PC-3p-110122_70	XM_016082316.2	2024	2043	2034	-32.1	-21.4	0.666667	7.5	2-16,2042-2028;19-21,2027-2025	1-1,2043-2043[UP5];17-18,x-x[BULq];22-22,2024-2024[UP3]	.(((--(((((((((((((((.&.)))))))))))))))..))).	UAGU--AGUUAACGGGGAUCCA&AGGAUUCUUGUUAACUUUGCUU	0	0	NA	NA	NA	1	39.6024	4	1	Output/R0h/cleaveLand_result/t_plot/PC-3p-110122_70_XM_016082316.2_2034_TPlot.pdf	0	39.6024	-Inf	down	3.1118e-10	6.0287e-10	yes	NA	ko03013(RNA transport)
PC-3p-110122_70	XM_016083344.2	875	897	888	-32.1	-21.6	0.672897	7	2-5,896-893;7-15,891-883;16-21,881-876	1-1,897-897[UP5];6-6,892-892[SIL];x-x,882-882[BULt];22-22,875-875[UP3]	.((((((.(((((((((.((((.&.)))).)))))))))-)))))).	CAGUAGAUGUUGACAAGUAUCCA&AGGAUUCUUGUUAAC-UUUGCUU	0	0	NA	NA	NA	2	79.2048	2	0.981353	Output/R0h/cleaveLand_result/t_plot/PC-3p-110122_70_XM_016083344.2_888_TPlot.pdf	0	79.2048	-Inf	down	5.5905e-19	3.89431e-18	yes	GO:0044464(cell part);GO:0044260(cellular macromolecule metabolic process);GO:0009059(macromolecule biosynthetic process);GO:0005737(cytoplasm);GO:0008152(metabolic process);GO:0043038(amino acid activation);GO:0044238(primary metabolic process);GO:0043043(peptide biosynthetic process);GO:0043039(tRNA aminoacylation);GO:0016874(ligase activity);GO:1901564(organonitrogen compound metabolic process…	ko00970(Aminoacyl-tRNA biosynthesis)
PC-3p-110122_70	XM_016083881.2	2238	2258	2250	-32.1	-21.1	0.657321	9.5	2-6,2257-2253;10-22,2250-2238	1-1,2258-2258[UP5];7-9,2252-2251[AILq]	(((((((((((((..-(((((.&.)))))...)))))))))))))	AAGCGAAGUUGGCCA-AAUCCA&AGGAUUCUUGUUAACUUUGCUU	1	32.684	4	1	Output/R8h/cleaveLand_result/t_plot/PC-3p-110122_70_XM_016083881.2_2250_TPlot.pdf	0	0	NA	NA	NA	32.684	0	Inf	up	1.084e-08	1.2485e-08	yes	NA	NA
PC-3p-110122_70	XM_016084270.2	318	339	330	-32.1	-26.5	0.825545	6	2-4,338-336;7-22,333-318	1-1,339-339[UP5];5-6,335-334[SIL]	((((((((((((((((..(((.&.)))..))))))))))))))))	GAGCAAGGUUAACAAGCCUCCA&AGGAUUCUUGUUAACUUUGCUU	0	0	NA	NA	NA	2	79.2048	3	0.0305497	Output/R0h/cleaveLand_result/t_plot/PC-3p-110122_70_XM_016084270.2_330_TPlot.pdf	0	79.2048	-Inf	down	5.5905e-19	3.89431e-18	yes	GO:0003735(structural constituent of ribosome);GO:0043228(non-membrane-bounded organelle);GO:0071704(organic substance metabolic process);GO:0006518(peptide metabolic process);GO:0043232(intracellular non-membrane-bounded organelle);GO:0043043(peptide biosynthetic process);GO:0022625(cytosolic large ribosomal subunit);GO:0022626(cytosolic ribosome);GO:0044237(cellular metabolic process);GO:000519…	ko03010(Ribosome)
PC-3p-110122_70	XM_016085529.1	57	78	69	-32.1	-22.58	0.703427	9	1-11,78-68;15-22,64-57	12-14,67-65[SIL]	((((((((...(((((((((((&)))))))))))...))))))))	GAGCAGAGCCCGCAGGAGUCUU&AGGAUUCUUGUUAACUUUGCUU	1	32.684	4	0.999193	Output/R8h/cleaveLand_result/t_plot/PC-3p-110122_70_XM_016085529.1_69_TPlot.pdf	0	0	NA	NA	NA	32.684	0	Inf	up	1.084e-08	1.2485e-08	yes	GO:0031326(regulation of cellular biosynthetic process);GO:0043231(intracellular membrane-bounded organelle);GO:0051252(regulation of RNA metabolic process);GO:0005488(binding);GO:0044424(intracellular part);GO:0043565(sequence-specific DNA binding);GO:0051171(regulation of nitrogen compound metabolic process);GO:1903506(regulation of nucleic acid-templated transcription);GO:0050794(regulation of…	NA
PC-3p-110122_70	XM_016085670.2	391	413	404	-32.1	-21.8	0.679128	7	2-3,412-411;5-13,409-401;14-20,399-393	1-1,413-413[UP5];4-4,410-410[SIL];x-x,400-400[BULt];21-22,392-391[UP3]	..(((((((.(((((((((.((.&.)).)))))))))-)))))))..	UCGCGAGGUAUAACAAGAAACCA&AGGAUUCUUGUUA-ACUUUGCUU	2	65.368	3	0.730081	Output/R8h/cleaveLand_result/t_plot/PC-3p-110122_70_XM_016085670.2_404_TPlot.pdf	1	39.6024	4	0.999983	Output/R0h/cleaveLand_result/t_plot/PC-3p-110122_70_XM_016085670.2_404_TPlot.pdf	65.368	39.6024	0.722997	up	0.011907	0.0127886	yes	GO:0043227(membrane-bounded organelle);GO:0003676(nucleic acid binding);GO:0000786(nucleosome);GO:1901363(heterocyclic compound binding);GO:0044815(DNA packaging complex);GO:0046983(protein dimerization activity);GO:0097159(organic cyclic compound binding);GO:0043231(intracellular membrane-bounded organelle);GO:0044424(intracellular part);GO:0043228(non-membrane-bounded organelle);GO:0032991(macr…	NA
PC-3p-110122_70	XM_016086542.2	1576	1598	1589	-32.1	-23.2	0.722741	4.5	1-14,1598-1585;15-22,1583-1576	x-x,1584-1584[BULt]	((((((((.((((((((((((((&))))))))))))))-))))))))	AAGCAAGGAUUAACAAGGAUUUU&AGGAUUCUUGUUAA-CUUUGCUU	0	0	NA	NA	NA	3	118.807	2	0.693631	Output/R0h/cleaveLand_result/t_plot/PC-3p-110122_70_XM_016086542.2_1589_TPlot.pdf	0	118.807	-Inf	down	1.1501e-27	2.01922e-26	yes	GO:0006518(peptide metabolic process);GO:0016875(ligase activity, forming carbon-oxygen bonds);GO:0043043(peptide biosynthetic process);GO:0036094(small molecule binding);GO:0044249(cellular biosynthetic process);GO:0043168(anion binding);GO:0009058(biosynthetic process);GO:0043038(amino acid activation);GO:0044281(small molecule metabolic process);GO:1901576(organic substance biosynthetic proces…	ko00970(Aminoacyl-tRNA biosynthesis)
PC-3p-110122_70	XM_016086828.2	251	270	262	-32.1	-22.5	0.700935	6	2-8,269-263;10-17,262-255;19-22,254-251	1-1,270-270[UP5];9-9,x-x[BULq];18-18,x-x[BULq]	((((-((((((((-(((((((.&.))))))).)))))))).))))	GAGC-GAGUUAAC-GGAAUCCG&AGGAUUCUUGUUAACUUUGCUU	2	65.368	3	0.52819	Output/R8h/cleaveLand_result/t_plot/PC-3p-110122_70_XM_016086828.2_262_TPlot.pdf	3	118.807	2	0.851172	Output/R0h/cleaveLand_result/t_plot/PC-3p-110122_70_XM_016086828.2_262_TPlot.pdf	65.368	118.807	-0.861965	down	8.22e-05	9.10902e-05	yes	GO:0009813(flavonoid biosynthetic process);GO:0009058(biosynthetic process);GO:0009812(flavonoid metabolic process);GO:0016872(intramolecular lyase activity);GO:0003824(catalytic activity);GO:0045430(chalcone isomerase activity);GO:1901576(organic substance biosynthetic process);GO:0016853(isomerase activity);GO:0008152(metabolic process);GO:0071704(organic substance metabolic process)	ko01100(Metabolic pathways);ko01110(Biosynthesis of secondary metabolites);ko00941(Flavonoid biosynthesis)
PC-3p-110122_70	XM_016087637.2	2197	2221	2212	-32.1	-21.2	0.660436	10.5	2-17,2220-2205;18-21,2201-2198	1-1,2221-2221[UP5];x-x,2204-2202[BULt];22-22,2197-2197[UP3]	.((((...((((((((((((((((.&.))))))))))))))))---)))).	UAGUACUGGGGUUGGCAAGAGUCUC&AGGAUUCUUGUUAACUU---UGCUU	1	32.684	4	1	Output/R8h/cleaveLand_result/t_plot/PC-3p-110122_70_XM_016087637.2_2212_TPlot.pdf	0	0	NA	NA	NA	32.684	0	Inf	up	1.084e-08	1.2485e-08	yes	GO:2000112(regulation of cellular macromolecule biosynthetic process);GO:0044464(cell part);GO:0051246(regulation of protein metabolic process);GO:0044248(cellular catabolic process);GO:0043228(non-membrane-bounded organelle);GO:0005737(cytoplasm);GO:0019439(aromatic compound catabolic process);GO:0006139(nucleobase-containing compound metabolic process);GO:0043170(macromolecule metabolic process…	ko03018(RNA degradation)
PC-3p-110122_70	XM_016087838.2	1542	1565	1553	-32.1	-20.9	0.65109	9	1-5,1565-1561;6-18,1557-1545;20-22,1544-1542	x-x,1560-1558[BULt];19-19,x-x[BULq]	(((-(((((((((((((...(((((&)))))---))))))))))))).)))	GAG-AAGGUUAACAGGAAAUAUCCU&AGGAU---UCUUGUUAACUUUGCUU	1	32.684	4	1	Output/R8h/cleaveLand_result/t_plot/PC-3p-110122_70_XM_016087838.2_1553_TPlot.pdf	0	0	NA	NA	NA	32.684	0	Inf	up	1.084e-08	1.2485e-08	yes	GO:0030880(RNA polymerase complex);GO:0005622(intracellular);GO:1901564(organonitrogen compound metabolic process);GO:0043234(protein complex);GO:0044451(nucleoplasm part);GO:2001141(regulation of RNA biosynthetic process);GO:0008152(metabolic process);GO:0009891(positive regulation of biosynthetic process);GO:0006357(regulation of transcription from RNA polymerase II promoter);GO:0008023(transcr…	NA
PC-3p-110122_70	XM_016087939.2	547	566	559	-32.1	-21.6	0.672897	9.5	2-8,565-559;11-20,558-549	1-1,566-566[UP5];9-10,x-x[BULq];21-22,548-547[UP3]	..((((((((((--(((((((.&.)))))))..))))))))))..	CCGCAAGGUUGA--AGAGUCCG&AGGAUUCUUGUUAACUUUGCUU	0	0	NA	NA	NA	2	79.2048	2	0.976715	Output/R0h/cleaveLand_result/t_plot/PC-3p-110122_70_XM_016087939.2_559_TPlot.pdf	0	79.2048	-Inf	down	5.5905e-19	3.89431e-18	yes	GO:0006807(nitrogen compound metabolic process);GO:0010467(gene expression);GO:0003723(RNA binding);GO:0043043(peptide biosynthetic process);GO:0003676(nucleic acid binding);GO:0065007(biological regulation);GO:1901564(organonitrogen compound metabolic process);GO:0044249(cellular biosynthetic process);GO:0043227(membrane-bounded organelle);GO:0009987(cellular process);GO:0044238(primary metaboli…	NA
PC-3p-110122_70	XM_016088321.2	791	813	803	-32.1	-21.4	0.666667	10	2-3,812-811;4-4,809-809;6-8,807-805;10-22,803-791	1-1,813-813[UP5];x-x,810-810[BULt];5-5,808-808[SIL];9-9,804-804[SIL]	(((((((((((((.(((.(.((.&.))-).))).)))))))))))))	AGGCAGAGUUAGCUGGAUUACCA&AGG-AUUCUUGUUAACUUUGCUU	1	32.684	4	1	Output/R8h/cleaveLand_result/t_plot/PC-3p-110122_70_XM_016088321.2_803_TPlot.pdf	0	0	NA	NA	NA	32.684	0	Inf	up	1.084e-08	1.2485e-08	yes	GO:0004175(endopeptidase activity);GO:0019538(protein metabolic process);GO:0003824(catalytic activity);GO:0044425(membrane part);GO:0006508(proteolysis);GO:0046872(metal ion binding);GO:0070011(peptidase activity, acting on L-amino acid peptides);GO:0016787(hydrolase activity);GO:0034641(cellular nitrogen compound metabolic process);GO:0043170(macromolecule metabolic process);GO:0008237(metallop…	NA
PC-3p-110122_70	XM_016090846.2	196	216	207	-32.1	-21.2	0.660436	9	2-2,215-215;5-13,212-204;15-22,203-196	1-1,216-216[UP5];3-4,214-213[SIL];14-14,x-x[BULq]	((((((((-(((((((((..(.&.)..))))))))).))))))))	GGGCGAGG-UGACAAGAAGACG&AGGAUUCUUGUUAACUUUGCUU	1	32.684	4	1	Output/R8h/cleaveLand_result/t_plot/PC-3p-110122_70_XM_016090846.2_207_TPlot.pdf	0	0	NA	NA	NA	32.684	0	Inf	up	1.084e-08	1.2485e-08	yes	GO:0032991(macromolecular complex);GO:0044464(cell part);GO:1990904(ribonucleoprotein complex);GO:0044444(cytoplasmic part);GO:0043229(intracellular organelle);GO:0005623(cell);GO:0030529(intracellular ribonucleoprotein complex);GO:0043226(organelle);GO:0005840(ribosome);GO:0043228(non-membrane-bounded organelle);GO:0005622(intracellular);GO:0043232(intracellular non-membrane-bounded organelle);G…	NA
PC-3p-110122_70	XM_016091670.2	969	990	981	-32.1	-27.6	0.859813	4	1-2,990-989;4-22,987-969	3-3,988-988[SIL]	(((((((((((((((((((.((&)).)))))))))))))))))))	GAGUAAAGUUGACAAGAAUGCU&AGGAUUCUUGUUAACUUUGCUU	0	0	NA	NA	NA	1	39.6024	4	0.136819	Output/R0h/cleaveLand_result/t_plot/PC-3p-110122_70_XM_016091670.2_981_TPlot.pdf	0	39.6024	-Inf	down	3.1118e-10	6.0287e-10	yes	NA	ko03440(Homologous recombination)
PC-3p-110122_70	XM_016095903.2	675	698	687	-32.1	-21.2	0.660436	12.5	2-5,697-694;6-19,691-678	1-1,698-698[UP5];x-x,693-692[BULt];20-22,677-675[UP3]	...((((((((((((((..((((.&.))))--))))))))))))))...	CCUCAGAGUUGACGGGAAGGUCCG&AGGAU--UCUUGUUAACUUUGCUU	0	0	NA	NA	NA	1	39.6024	4	1	Output/R0h/cleaveLand_result/t_plot/PC-3p-110122_70_XM_016095903.2_687_TPlot.pdf	0	39.6024	-Inf	down	3.1118e-10	6.0287e-10	yes	GO:0031226(intrinsic component of plasma membrane);GO:0050789(regulation of biological process);GO:0005886(plasma membrane);GO:0007165(signal transduction);GO:0044464(cell part);GO:0006952(defense response);GO:0030054(cell junction);GO:0046658(anchored component of plasma membrane);GO:0050896(response to stimulus);GO:0005911(cell-cell junction);GO:0065007(biological regulation);GO:0016020(membran…	NA
PC-3p-110122_70	XM_016096360.2	1173	1200	1191	-32.1	-21.6	0.672897	19.5	2-8,1199-1193;10-11,1191-1190;12-22,1183-1173	1-1,1200-1200[UP5];9-9,1192-1192[SIL];x-x,1189-1184[BULt]	(((((((((((......((.(((((((.&.))))))).))------)))))))))))	GAGCGGAGUUGGAGGAAGCCGGAAUCCG&AGGAUUCUUGU------UAACUUUGCUU	1	32.684	4	1	Output/R8h/cleaveLand_result/t_plot/PC-3p-110122_70_XM_016096360.2_1191_TPlot.pdf	0	0	NA	NA	NA	32.684	0	Inf	up	1.084e-08	1.2485e-08	yes	NA	NA
PC-3p-110122_70	XM_016096535.2	608	630	621	-32.1	-22.7	0.707165	5	1-12,630-619;14-15,617-616;17-22,613-608	13-13,618-618[SIL];16-16,615-614[AILt]	((((((..((.((((((((((((&)))))))))))).))-.))))))	AAGCAAUUGUAGAUAAGAAUCCU&AGGAUUCUUGUUAAC-UUUGCUU	1	32.684	4	0.99843	Output/R8h/cleaveLand_result/t_plot/PC-3p-110122_70_XM_016096535.2_621_TPlot.pdf	0	0	NA	NA	NA	32.684	0	Inf	up	1.084e-08	1.2485e-08	yes	GO:0098796(membrane protein complex);GO:0031982(vesicle);GO:0042886(amide transport);GO:0005798(Golgi-associated vesicle);GO:0030660(Golgi-associated vesicle membrane);GO:0030663(COPI-coated vesicle membrane);GO:0030126(COPI vesicle coat);GO:0005198(structural molecule activity);GO:0071702(organic substance transport);GO:0006886(intracellular protein transport);GO:0043234(protein complex);GO:0071…	NA
PC-3p-110122_70	XM_016097141.2	1595	1617	1608	-32.1	-21.6	0.672897	9	3-10,1615-1608;11-16,1606-1601;18-22,1599-1595	1-2,1617-1616[UP5];x-x,1607-1607[BULt];17-17,1600-1600[SIL]	(((((.((((((.((((((((..&..))))))))-)))))).)))))	AGGCAUGGUUGAUCGAGAAUCAU&AGGAUUCUUG-UUAACUUUGCUU	2	65.368	2	0.995042	Output/R8h/cleaveLand_result/t_plot/PC-3p-110122_70_XM_016097141.2_1608_TPlot.pdf	0	0	NA	NA	NA	65.368	0	Inf	up	6.2072e-16	2.71719e-15	yes	GO:0000166(nucleotide binding);GO:0016628(oxidoreductase activity, acting on the CH-CH group of donors, NAD or NADP as acceptor);GO:0048037(cofactor binding);GO:0016021(integral component of membrane);GO:0043168(anion binding);GO:0016020(membrane);GO:1901265(nucleoside phosphate binding);GO:0005488(binding);GO:0008202(steroid metabolic process);GO:0016614(oxidoreductase activity, acting on CH-OH …	ko01100(Metabolic pathways);ko01110(Biosynthesis of secondary metabolites);ko00100(Steroid biosynthesis)
PC-3p-110122_70	XM_016100048.2	1786	1807	1798	-32.1	-25.8	0.803738	6.5	1-21,1807-1787	22-22,1786-1786[UP3]	.(((((((((((((((((((((&))))))))))))))))))))).	CAGCGAAGUUGAUGGGAAUCUU&AGGAUUCUUGUUAACUUUGCUU	1	32.684	4	0.519137	Output/R8h/cleaveLand_result/t_plot/PC-3p-110122_70_XM_016100048.2_1798_TPlot.pdf	0	0	NA	NA	NA	32.684	0	Inf	up	1.084e-08	1.2485e-08	yes	GO:0005515(protein binding);GO:0043168(anion binding);GO:0031406(carboxylic acid binding);GO:0046983(protein dimerization activity);GO:0036094(small molecule binding);GO:0043167(ion binding);GO:0005488(binding);GO:0008152(metabolic process);GO:0043177(organic acid binding);GO:0016597(amino acid binding)	ko01110(Biosynthesis of secondary metabolites);ko04016(MAPK signaling pathway - plant);ko01100(Metabolic pathways);ko00860(Porphyrin and chlorophyll metabolism);ko04075(Plant hormone signal transduction)
PC-3p-110122_70	XM_016100282.2	2373	2393	2385	-32.1	-21.8	0.679128	8	2-9,2392-2385;11-22,2384-2373	1-1,2393-2393[UP5];10-10,x-x[BULq]	((((((((((((-((((((((.&.)))))))).))))))))))))	AGGCAAGGUUAG-AGGAGUUCA&AGGAUUCUUGUUAACUUUGCUU	1	32.684	4	0.999998	Output/R8h/cleaveLand_result/t_plot/PC-3p-110122_70_XM_016100282.2_2385_TPlot.pdf	0	0	NA	NA	NA	32.684	0	Inf	up	1.084e-08	1.2485e-08	yes	GO:0005509(calcium ion binding);GO:0016491(oxidoreductase activity);GO:0016020(membrane);GO:0043169(cation binding);GO:0005488(binding);GO:0098754(detoxification);GO:0016651(oxidoreductase activity, acting on NAD(P)H);GO:0098869(cellular oxidant detoxification);GO:0004601(peroxidase activity);GO:0050896(response to stimulus);GO:0042221(response to chemical);GO:0046872(metal ion binding);GO:001668…	ko04626(Plant-pathogen interaction);ko04016(MAPK signaling pathway - plant)
PC-3p-110122_70	XM_016101237.2	1813	1831	1823	-32.1	-21.2	0.660436	9	2-8,1830-1824;10-11,1823-1822;14-22,1821-1813	1-1,1831-1831[UP5];9-9,x-x[BULq];12-13,x-x[BULq]	(((((((((--((-(((((((.&.))))))).))..)))))))))	GAGCAAGGU--GC-AGAGUCCG&AGGAUUCUUGUUAACUUUGCUU	1	32.684	4	1	Output/R8h/cleaveLand_result/t_plot/PC-3p-110122_70_XM_016101237.2_1823_TPlot.pdf	0	0	NA	NA	NA	32.684	0	Inf	up	1.084e-08	1.2485e-08	yes	GO:0031224(intrinsic component of membrane);GO:0006796(phosphate-containing compound metabolic process);GO:0043170(macromolecule metabolic process);GO:0044238(primary metabolic process);GO:0009987(cellular process);GO:0005524(ATP binding);GO:1901564(organonitrogen compound metabolic process);GO:0032555(purine ribonucleotide binding);GO:0005488(binding);GO:0030554(adenyl nucleotide binding);GO:001…	NA
PC-3p-110122_70	XM_016101943.2	325	345	337	-32.1	-22.1	0.688474	7	2-5,344-341;7-12,340-335;15-21,332-326	1-1,345-345[UP5];6-6,x-x[BULq];13-14,334-333[SIL];22-22,325-325[UP3]	.(((((((..((((((-((((.&.)))).))))))..))))))).	CGGCAAGGGCAACAAG-AUCCG&AGGAUUCUUGUUAACUUUGCUU	4	130.736	2	0.96803	Output/R8h/cleaveLand_result/t_plot/PC-3p-110122_70_XM_016101943.2_337_TPlot.pdf	4	158.41	2	0.922289	Output/R0h/cleaveLand_result/t_plot/PC-3p-110122_70_XM_016101943.2_337_TPlot.pdf	130.736	158.41	-0.277003	down	0.10362	0.110863	yes	GO:0016020(membrane);GO:0044425(membrane part);GO:0016021(integral component of membrane);GO:0031224(intrinsic component of membrane)	ko00190(Oxidative phosphorylation);ko01100(Metabolic pathways)
PC-3p-110122_70	XM_016102412.2	874	897	888	-32.1	-24.2	0.753894	6	2-18,896-880;19-22,877-874	1-1,897-897[UP5];x-x,879-878[BULt]	((((..(((((((((((((((((.&.)))))))))))))))))--))))	AAGCUGAAAGUUGGCAAGAAUCUG&AGGAUUCUUGUUAACUUU--GCUU	1	32.684	4	0.844904	Output/R8h/cleaveLand_result/t_plot/PC-3p-110122_70_XM_016102412.2_888_TPlot.pdf	0	0	NA	NA	NA	32.684	0	Inf	up	1.084e-08	1.2485e-08	yes	GO:0003824(catalytic activity);GO:0008152(metabolic process)	ko01110(Biosynthesis of secondary metabolites);ko00130(Ubiquinone and other terpenoid-quinone biosynthesis);ko01100(Metabolic pathways)
PC-3p-110122_70	XM_016103212.2	100	124	115	-32.1	-21.8	0.679128	8.5	2-3,123-122;5-15,120-110;16-22,106-100	1-1,124-124[UP5];4-4,121-121[SIL];x-x,109-107[BULt]	(((((((...(((((((((((.((.&.)).)))))))))))---)))))))	GAGCGAGCCCGUUAGCAAGAAGCCG&AGGAUUCUUGUUAAC---UUUGCUU	0	0	NA	NA	NA	1	39.6024	4	0.999978	Output/R0h/cleaveLand_result/t_plot/PC-3p-110122_70_XM_016103212.2_115_TPlot.pdf	0	39.6024	-Inf	down	3.1118e-10	6.0287e-10	yes	GO:0031224(intrinsic component of membrane);GO:0016020(membrane);GO:0044425(membrane part);GO:0016021(integral component of membrane)	NA
PC-3p-110122_70	XM_016103562.2	841	861	852	-32.1	-22.1	0.688474	7.5	1-7,861-855;10-12,852-850;15-22,848-841	8-9,854-853[SIL];13-14,849-849[AILq]	((((((((.-(((..(((((((&)))))))..)))..))))))))	AAGCAAGGG-AACUUGAGUCCU&AGGAUUCUUGUUAACUUUGCUU	0	0	NA	NA	NA	2	79.2048	2	0.927702	Output/R0h/cleaveLand_result/t_plot/PC-3p-110122_70_XM_016103562.2_852_TPlot.pdf	0	79.2048	-Inf	down	5.5905e-19	3.89431e-18	yes	GO:0031325(positive regulation of cellular metabolic process);GO:0019222(regulation of metabolic process);GO:0009057(macromolecule catabolic process);GO:0045899(positive regulation of RNA polymerase II transcriptional preinitiation complex assembly);GO:0060255(regulation of macromolecule metabolic process);GO:1903362(regulation of cellular protein catabolic process);GO:0003824(catalytic activity)…	ko04141(Protein processing in endoplasmic reticulum)
PC-3p-110122_70	XM_016103986.2	654	675	666	-32.1	-21.2	0.660436	7	1-2,675-674;4-19,672-657	3-3,673-673[SIL];20-22,656-654[UP3]	...((((((((((((((((.((&)).))))))))))))))))...	UUCCAAAGUUAGCAAGAAUGUU&AGGAUUCUUGUUAACUUUGCUU	0	0	NA	NA	NA	1	39.6024	4	1	Output/R0h/cleaveLand_result/t_plot/PC-3p-110122_70_XM_016103986.2_666_TPlot.pdf	0	39.6024	-Inf	down	3.1118e-10	6.0287e-10	yes	NA	NA
PC-3p-110122_70	XM_016105061.2	634	657	646	-32.1	-26	0.809969	6.5	1-3,657-655;4-21,652-635	x-x,654-653[BULt];22-22,634-634[UP3]	.((((((((((((((((((..(((&)))--)))))))))))))))))).	CGGCGAGGUUAACAAGAAUGACCU&AGG--AUUCUUGUUAACUUUGCUU	0	0	NA	NA	NA	2	79.2048	2	0.139252	Output/R0h/cleaveLand_result/t_plot/PC-3p-110122_70_XM_016105061.2_646_TPlot.pdf	0	79.2048	-Inf	down	5.5905e-19	3.89431e-18	yes	GO:0043492(ATPase activity, coupled to movement of substances);GO:0043229(intracellular organelle);GO:0051234(establishment of localization);GO:0017111(nucleoside-triphosphatase activity);GO:0042623(ATPase activity, coupled);GO:0043231(intracellular membrane-bounded organelle);GO:0044422(organelle part);GO:0098805(whole membrane);GO:0044437(vacuolar part);GO:0044464(cell part);GO:0005773(vacuole)…	ko04145(Phagosome);ko01100(Metabolic pathways);ko00190(Oxidative phosphorylation)
PC-3p-110122_70	XM_016105066.2	400	423	412	-32.1	-26	0.809969	6.5	1-3,423-421;4-21,418-401	x-x,420-419[BULt];22-22,400-400[UP3]	.((((((((((((((((((..(((&)))--)))))))))))))))))).	CGGCGAGGUUAACAAGAAUGACCU&AGG--AUUCUUGUUAACUUUGCUU	0	0	NA	NA	NA	1	39.6024	4	0.402473	Output/R0h/cleaveLand_result/t_plot/PC-3p-110122_70_XM_016105066.2_412_TPlot.pdf	0	39.6024	-Inf	down	3.1118e-10	6.0287e-10	yes	GO:0043492(ATPase activity, coupled to movement of substances);GO:0043229(intracellular organelle);GO:0051234(establishment of localization);GO:0017111(nucleoside-triphosphatase activity);GO:0042623(ATPase activity, coupled);GO:0043231(intracellular membrane-bounded organelle);GO:0044422(organelle part);GO:0098805(whole membrane);GO:0044437(vacuolar part);GO:0044464(cell part);GO:0005773(vacuole)…	ko04145(Phagosome);ko01100(Metabolic pathways);ko00190(Oxidative phosphorylation)
PC-3p-110122_70	XM_016105930.2	1381	1402	1393	-32.1	-23.5	0.732087	9	2-2,1401-1401;5-21,1398-1382	1-1,1402-1402[UP5];3-4,1400-1399[SIL];22-22,1381-1381[UP3]	.(((((((((((((((((..(.&.)..))))))))))))))))).	UGGCAAGGUUAACAGGAGCACA&AGGAUUCUUGUUAACUUUGCUU	1	32.684	4	0.967903	Output/R8h/cleaveLand_result/t_plot/PC-3p-110122_70_XM_016105930.2_1393_TPlot.pdf	0	0	NA	NA	NA	32.684	0	Inf	up	1.084e-08	1.2485e-08	yes	GO:0016021(integral component of membrane);GO:0031224(intrinsic component of membrane);GO:0044425(membrane part);GO:0016020(membrane)	ko03013(RNA transport);ko03008(Ribosome biogenesis in eukaryotes)
PC-3p-110122_70	XM_016105931.2	1386	1407	1398	-32.1	-23.5	0.732087	9	2-2,1406-1406;5-21,1403-1387	1-1,1407-1407[UP5];3-4,1405-1404[SIL];22-22,1386-1386[UP3]	.(((((((((((((((((..(.&.)..))))))))))))))))).	UGGCAAGGUUAACAGGAGCACA&AGGAUUCUUGUUAACUUUGCUU	3	98.052	2	0.651927	Output/R8h/cleaveLand_result/t_plot/PC-3p-110122_70_XM_016105931.2_1398_TPlot.pdf	1	39.6024	4	0.925218	Output/R0h/cleaveLand_result/t_plot/PC-3p-110122_70_XM_016105931.2_1398_TPlot.pdf	98.052	39.6024	1.30796	up	6.2938e-07	7.14036e-07	yes	GO:0016021(integral component of membrane);GO:0031224(intrinsic component of membrane);GO:0044425(membrane part);GO:0016020(membrane)	ko03013(RNA transport);ko03008(Ribosome biogenesis in eukaryotes)
PC-3p-110122_70	XM_016105946.2	632	654	644	-32.1	-22.4	0.697819	13.5	2-9,653-646;14-22,640-632	1-1,654-654[UP5];10-13,645-641[AILt]	(((((((((.....((((((((.&.))))))))-....)))))))))	GAGCGAGGUGUUAAGAGAGUCCG&AGGAUUCUU-GUUAACUUUGCUU	2	65.368	3	0.563959	Output/R8h/cleaveLand_result/t_plot/PC-3p-110122_70_XM_016105946.2_644_TPlot.pdf	2	79.2048	3	0.414034	Output/R0h/cleaveLand_result/t_plot/PC-3p-110122_70_XM_016105946.2_644_TPlot.pdf	65.368	79.2048	-0.277003	down	0.24981	0.262584	yes	GO:0043167(ion binding);GO:0071704(organic substance metabolic process);GO:0004619(phosphoglycerate mutase activity);GO:0044424(intracellular part);GO:0008152(metabolic process);GO:1901575(organic substance catabolic process);GO:0044282(small molecule catabolic process);GO:0016868(intramolecular transferase activity, phosphotransferases);GO:0046914(transition metal ion binding);GO:0009056(catabol…	ko01230(Biosynthesis of amino acids);ko01110(Biosynthesis of secondary metabolites);ko00260(Glycine, serine and threonine metabolism);ko01200(Carbon metabolism);ko00010(Glycolysis / Gluconeogenesis);ko01100(Metabolic pathways)
PC-3p-110122_70	XM_016105947.2	632	654	644	-32.1	-22.4	0.697819	13.5	2-9,653-646;14-22,640-632	1-1,654-654[UP5];10-13,645-641[AILt]	(((((((((.....((((((((.&.))))))))-....)))))))))	GAGCGAGGUGUUAAGAGAGUCCG&AGGAUUCUU-GUUAACUUUGCUU	3	98.052	2	0.934906	Output/R8h/cleaveLand_result/t_plot/PC-3p-110122_70_XM_016105947.2_644_TPlot.pdf	4	158.41	2	0.868289	Output/R0h/cleaveLand_result/t_plot/PC-3p-110122_70_XM_016105947.2_644_TPlot.pdf	98.052	158.41	-0.69204	down	0.00016378	0.000181052	yes	GO:0043167(ion binding);GO:0071704(organic substance metabolic process);GO:0004619(phosphoglycerate mutase activity);GO:0044424(intracellular part);GO:0008152(metabolic process);GO:1901575(organic substance catabolic process);GO:0044282(small molecule catabolic process);GO:0016868(intramolecular transferase activity, phosphotransferases);GO:0046914(transition metal ion binding);GO:0009056(catabol…	ko01230(Biosynthesis of amino acids);ko01110(Biosynthesis of secondary metabolites);ko00260(Glycine, serine and threonine metabolism);ko01200(Carbon metabolism);ko00010(Glycolysis / Gluconeogenesis);ko01100(Metabolic pathways)
PC-3p-110122_70	XM_016107966.2	1031	1051	1042	-32.1	-21	0.654206	8.5	2-12,1050-1040;15-19,1038-1034	1-1,1051-1051[UP5];13-14,1039-1039[AILq];20-22,1033-1031[UP3]	...(((((.-(((((((((((.&.)))))))))))..)))))...	UCACAGAGG-AGCAAGAGUCCA&AGGAUUCUUGUUAACUUUGCUU	0	0	NA	NA	NA	1	39.6024	4	1	Output/R0h/cleaveLand_result/t_plot/PC-3p-110122_70_XM_016107966.2_1042_TPlot.pdf	0	39.6024	-Inf	down	3.1118e-10	6.0287e-10	yes	GO:0046914(transition metal ion binding);GO:0008152(metabolic process);GO:0043169(cation binding);GO:0046872(metal ion binding);GO:0044425(membrane part);GO:0046906(tetrapyrrole binding);GO:0043167(ion binding);GO:0016705(oxidoreductase activity, acting on paired donors, with incorporation or reduction of molecular oxygen);GO:0004497(monooxygenase activity);GO:0020037(heme binding);GO:0016491(oxi…	ko00906(Carotenoid biosynthesis)
PC-3p-110122_70	XM_016108166.2	1130	1151	1142	-32.1	-22.1	0.688474	5	1-2,1151-1150;4-12,1148-1140;14-22,1138-1130	3-3,1149-1149[SIL];13-13,1139-1139[SIL]	(((((((((.(((((((((.((&)).))))))))).)))))))))	AAGUGAAGUGAACAAGAGUGCU&AGGAUUCUUGUUAACUUUGCUU	1	32.684	4	0.999965	Output/R8h/cleaveLand_result/t_plot/PC-3p-110122_70_XM_016108166.2_1142_TPlot.pdf	0	0	NA	NA	NA	32.684	0	Inf	up	1.084e-08	1.2485e-08	yes	GO:0044424(intracellular part);GO:0000003(reproduction);GO:0035825(homologous recombination);GO:0006139(nucleobase-containing compound metabolic process);GO:0071704(organic substance metabolic process);GO:0051304(chromosome separation);GO:0033554(cellular response to stress);GO:0050896(response to stimulus);GO:0044464(cell part);GO:0097159(organic cyclic compound binding);GO:0006996(organelle org…	ko03420(Nucleotide excision repair)
PC-3p-110122_70	XM_016108342.2	2085	2105	2096	-32.1	-21	0.654206	5.5	2-2,2104-2104;4-12,2102-2094;15-22,2092-2085	1-1,2105-2105[UP5];3-3,2103-2103[SIL];13-14,2093-2093[AILq]	((((((((.-(((((((((.(.&.).)))))))))..))))))))	AAGCAGAGA-AACAAGAAUGCA&AGGAUUCUUGUUAACUUUGCUU	1	32.684	4	1	Output/R8h/cleaveLand_result/t_plot/PC-3p-110122_70_XM_016108342.2_2096_TPlot.pdf	0	0	NA	NA	NA	32.684	0	Inf	up	1.084e-08	1.2485e-08	yes	GO:0016021(integral component of membrane);GO:0043492(ATPase activity, coupled to movement of substances);GO:0035639(purine ribonucleoside triphosphate binding);GO:0070838(divalent metal ion transport);GO:0005887(integral component of plasma membrane);GO:0034220(ion transmembrane transport);GO:0022804(active transmembrane transporter activity);GO:0070588(calcium ion transmembrane transport);GO:00…	NA
PC-3p-110122_70	XM_016108554.2	459	483	475	-32.1	-21.8	0.679128	8	1-3,483-481;5-14,480-471;15-22,466-459	4-4,x-x[BULq];x-x,470-467[BULt]	((((((((....((((((((((-(((&))).))))))))))----))))))))	GAGCAAGGGAAUUUAGCAAGAA-CCU&AGGAUUCUUGUUAA----CUUUGCUU	2	65.368	2	0.989038	Output/R8h/cleaveLand_result/t_plot/PC-3p-110122_70_XM_016108554.2_475_TPlot.pdf	0	0	NA	NA	NA	65.368	0	Inf	up	6.2072e-16	2.71719e-15	yes	GO:0043227(membrane-bounded organelle);GO:0043229(intracellular organelle);GO:0043226(organelle);GO:0016020(membrane);GO:0044464(cell part);GO:0043231(intracellular membrane-bounded organelle);GO:0044424(intracellular part);GO:0012505(endomembrane system);GO:0031224(intrinsic component of membrane);GO:0044444(cytoplasmic part);GO:0044425(membrane part);GO:0005737(cytoplasm);GO:0005794(Golgi appar…	ko00040(Pentose and glucuronate interconversions);ko01100(Metabolic pathways)
PC-3p-110122_70	XM_016109136.2	1097	1117	1108	-32.1	-25.1	0.781931	4	1-13,1117-1105;15-18,1104-1101;20-22,1099-1097	14-14,x-x[BULq];19-19,1100-1100[SIL]	(((.((((-(((((((((((((&))))))))))))).)))).)))	GAGGGAAG-UAGCAAGAAUCCU&AGGAUUCUUGUUAACUUUGCUU	2	65.368	2	0.241896	Output/R8h/cleaveLand_result/t_plot/PC-3p-110122_70_XM_016109136.2_1108_TPlot.pdf	0	0	NA	NA	NA	65.368	0	Inf	up	6.2072e-16	2.71719e-15	yes	GO:0032555(purine ribonucleotide binding);GO:0072524(pyridine-containing compound metabolic process);GO:0043167(ion binding);GO:0046496(nicotinamide nucleotide metabolic process);GO:0055082(cellular chemical homeostasis);GO:0019637(organophosphate metabolic process);GO:0055086(nucleobase-containing small molecule metabolic process);GO:0016773(phosphotransferase activity, alcohol group as acceptor…	ko00500(Starch and sucrose metabolism);ko00052(Galactose metabolism);ko01100(Metabolic pathways);ko00051(Fructose and mannose metabolism);ko00010(Glycolysis / Gluconeogenesis);ko00520(Amino sugar and nucleotide sugar metabolism);ko01110(Biosynthesis of secondary metabolites);ko01200(Carbon metabolism)
PC-3p-110122_70	XM_016109308.2	2476	2499	2490	-32.1	-21.24	0.661682	13	2-10,2498-2490;15-21,2483-2477	1-1,2499-2499[UP5];11-14,2489-2484[AILt];22-22,2476-2476[UP3]	.(((((((......(((((((((.&.)))))))))--....))))))).	CAGCAAAGAAAUUUCAAGAGUCCA&AGGAUUCUUG--UUAACUUUGCUU	4	130.736	2	0.999073	Output/R8h/cleaveLand_result/t_plot/PC-3p-110122_70_XM_016109308.2_2490_TPlot.pdf	0	0	NA	NA	NA	130.736	0	Inf	up	2.8161e-30	6.66857e-29	yes	NA	NA
PC-3p-110122_70	XM_016111589.2	857	878	870	-32.1	-21.2	0.660436	8.5	1-3,878-876;5-9,875-871;11-14,869-866;15-22,864-857	4-4,x-x[BULq];10-10,870-870[SIL];x-x,865-865[BULt]	((((((((.((((.(((((-(((&))).))))).))))-))))))))	GAGCAAAGUUUGAGGAGGA-CCU&AGGAUUCUUGUUAA-CUUUGCUU	0	0	NA	NA	NA	1	39.6024	4	1	Output/R0h/cleaveLand_result/t_plot/PC-3p-110122_70_XM_016111589.2_870_TPlot.pdf	0	39.6024	-Inf	down	3.1118e-10	6.0287e-10	yes	GO:1901265(nucleoside phosphate binding);GO:0008152(metabolic process);GO:0016491(oxidoreductase activity);GO:0036094(small molecule binding);GO:0005488(binding);GO:0003824(catalytic activity);GO:0097159(organic cyclic compound binding);GO:0048037(cofactor binding);GO:0055114(oxidation-reduction process);GO:0000166(nucleotide binding);GO:0016614(oxidoreductase activity, acting on CH-OH group of d…	ko01200(Carbon metabolism);ko00630(Glyoxylate and dicarboxylate metabolism);ko01100(Metabolic pathways)
PC-3p-110122_70	XM_016112239.1	1752	1774	1764	-32.1	-22.5	0.700935	8	1-8,1774-1767;9-21,1765-1753	x-x,1766-1766[BULt];22-22,1752-1752[UP3]	.(((((((((((((.((((((((&))))))))-))))))))))))).	CAGUGAAGUUGACAGGGGAUCUU&AGGAUUCU-UGUUAACUUUGCUU	1	32.684	4	0.999557	Output/R8h/cleaveLand_result/t_plot/PC-3p-110122_70_XM_016112239.1_1764_TPlot.pdf	1	39.6024	4	0.998339	Output/R0h/cleaveLand_result/t_plot/PC-3p-110122_70_XM_016112239.1_1764_TPlot.pdf	32.684	39.6024	-0.277003	down	0.4158	0.417305	yes	GO:0042651(thylakoid membrane);GO:0016020(membrane);GO:0042221(response to chemical);GO:0044436(thylakoid part);GO:0006950(response to stress);GO:0000304(response to singlet oxygen);GO:0005623(cell);GO:0009579(thylakoid);GO:1901700(response to oxygen-containing compound);GO:0044464(cell part);GO:0050896(response to stimulus);GO:0044424(intracellular part);GO:0000302(response to reactive oxygen sp…	ko03018(RNA degradation)
PC-3p-110122_70	XM_016113208.2	307	328	319	-32.1	-26.4	0.82243	6	2-4,327-325;7-22,322-307	1-1,328-328[UP5];5-6,324-323[SIL]	((((((((((((((((..(((.&.)))..))))))))))))))))	GAGCAAGGUUAACAAGCCUCCG&AGGAUUCUUGUUAACUUUGCUU	0	0	NA	NA	NA	2	79.2048	3	0.0319159	Output/R0h/cleaveLand_result/t_plot/PC-3p-110122_70_XM_016113208.2_319_TPlot.pdf	0	79.2048	-Inf	down	5.5905e-19	3.89431e-18	yes	GO:0009058(biosynthetic process);GO:0009987(cellular process);GO:0006518(peptide metabolic process);GO:0043603(cellular amide metabolic process);GO:0010467(gene expression);GO:1901564(organonitrogen compound metabolic process);GO:0043228(non-membrane-bounded organelle);GO:0030529(intracellular ribonucleoprotein complex);GO:0044237(cellular metabolic process);GO:0032991(macromolecular complex);GO:…	ko03010(Ribosome)
PC-3p-110122_70	XM_016114512.2	420	439	430	-32.1	-21.3	0.663551	7.5	2-9,438-431;11-12,429-428;15-22,427-420	1-1,439-439[UP5];10-10,430-430[SIL];13-14,x-x[BULq]	((((((((--((.((((((((.&.)))))))).))..))))))))	GAGCGAGG--GAGAAGAAUCCG&AGGAUUCUUGUUAACUUUGCUU	0	0	NA	NA	NA	1	39.6024	4	1	Output/R0h/cleaveLand_result/t_plot/PC-3p-110122_70_XM_016114512.2_430_TPlot.pdf	0	39.6024	-Inf	down	3.1118e-10	6.0287e-10	yes	GO:0071704(organic substance metabolic process);GO:0036094(small molecule binding);GO:0006464(cellular protein modification process);GO:1901363(heterocyclic compound binding);GO:0016740(transferase activity);GO:0016301(kinase activity);GO:0035639(purine ribonucleoside triphosphate binding);GO:0043170(macromolecule metabolic process);GO:0036211(protein modification process);GO:0016310(phosphorylat…	NA
PC-3p-110122_70	XM_016115839.2	883	903	894	-32.1	-21.7	0.676012	9	2-9,902-895;11-12,893-892;15-22,890-883	1-1,903-903[UP5];10-10,894-894[SIL];13-14,891-891[AILq]	((((((((.-((.((((((((.&.)))))))).))..))))))))	AGGCGAAGG-AAGGGGAGUCCG&AGGAUUCUUGUUAACUUUGCUU	0	0	NA	NA	NA	1	39.6024	4	0.999994	Output/R0h/cleaveLand_result/t_plot/PC-3p-110122_70_XM_016115839.2_894_TPlot.pdf	0	39.6024	-Inf	down	3.1118e-10	6.0287e-10	yes	NA	NA
PC-3p-110122_70	XM_016117331.2	1094	1118	1105	-32.1	-20.9	0.65109	15	2-5,1117-1114;6-11,1109-1104;13-21,1103-1095	1-1,1118-1118[UP5];x-x,1113-1110[BULt];12-12,x-x[BULq];22-22,1094-1094[UP3]	.(((((((((-((((((....((((.&.))))----)))))).))))))))).	UAGCAAAGUU-GCAGGACAAGGUCCC&AGGAU----UCUUGUUAACUUUGCUU	1	32.684	4	1	Output/R8h/cleaveLand_result/t_plot/PC-3p-110122_70_XM_016117331.2_1105_TPlot.pdf	0	0	NA	NA	NA	32.684	0	Inf	up	1.084e-08	1.2485e-08	yes	GO:0044425(membrane part);GO:0016021(integral component of membrane);GO:0016020(membrane);GO:0031224(intrinsic component of membrane)	ko04626(Plant-pathogen interaction)
PC-3p-110122_70	XM_016117788.2	452	474	465	-32.1	-23.9	0.744548	9	2-4,473-471;6-19,469-456;20-22,454-452	1-1,474-474[UP5];5-5,470-470[SIL];x-x,455-455[BULt]	(((.((((((((((((((.(((.&.))).))))))))))))))-)))	GAGACAGAGUUGGCGAGGCUCCA&AGGAUUCUUGUUAACUUUG-CUU	1	32.684	4	0.872978	Output/R8h/cleaveLand_result/t_plot/PC-3p-110122_70_XM_016117788.2_465_TPlot.pdf	0	0	NA	NA	NA	32.684	0	Inf	up	1.084e-08	1.2485e-08	yes	GO:0016020(membrane)	NA
PC-3p-110122_70	XM_016118277.2	310	332	323	-32.1	-22	0.685358	6	1-13,332-320;15-15,318-318;16-22,316-310	14-14,319-319[SIL];x-x,317-317[BULt]	(((((((.(.(((((((((((((&))))))))))))).)-)))))))	AAGCAAAUGGUAGCAGGAGUUCU&AGGAUUCUUGUUAAC-UUUGCUU	1	32.684	4	0.999988	Output/R8h/cleaveLand_result/t_plot/PC-3p-110122_70_XM_016118277.2_323_TPlot.pdf	0	0	NA	NA	NA	32.684	0	Inf	up	1.084e-08	1.2485e-08	yes	GO:0006605(protein targeting);GO:0022857(transmembrane transporter activity);GO:0055085(transmembrane transport);GO:0071806(protein transmembrane transport);GO:0071705(nitrogen compound transport);GO:0033036(macromolecule localization);GO:0006886(intracellular protein transport);GO:0022884(macromolecule transmembrane transporter activity);GO:0042886(amide transport);GO:0008320(protein transmembra…	ko03060(Protein export);ko04141(Protein processing in endoplasmic reticulum);ko04145(Phagosome)
PC-3p-110122_70	XM_021125471.1	898	925	916	-32.1	-21.3	0.663551	12.5	2-10,924-916;13-17,913-909;18-22,902-898	1-1,925-925[UP5];11-12,915-914[SIL];x-x,908-903[BULt]	(((((......(((((..(((((((((.&.)))))))))..)))))------)))))	AAGCAUACAUUGAGUUCUCAGGAAUCCA&AGGAUUCUUGUUAACUU------UGCUU	1	32.684	4	1	Output/R8h/cleaveLand_result/t_plot/PC-3p-110122_70_XM_021125471.1_916_TPlot.pdf	0	0	NA	NA	NA	32.684	0	Inf	up	1.084e-08	1.2485e-08	yes	GO:1901564(organonitrogen compound metabolic process);GO:0046394(carboxylic acid biosynthetic process);GO:0008652(cellular amino acid biosynthetic process);GO:0030170(pyridoxal phosphate binding);GO:0048037(cofactor binding);GO:1901363(heterocyclic compound binding);GO:0018130(heterocycle biosynthetic process);GO:1901362(organic cyclic compound biosynthetic process);GO:1901605(alpha-amino acid me…	ko01230(Biosynthesis of amino acids);ko00960(Tropane, piperidine and pyridine alkaloid biosynthesis);ko00340(Histidine metabolism);ko00400(Phenylalanine, tyrosine and tryptophan biosynthesis);ko00360(Phenylalanine metabolism);ko01100(Metabolic pathways);ko00350(Tyrosine metabolism);ko01110(Biosynthesis of secondary metabolites)
PC-3p-110122_70	XM_021128342.1	378	398	389	-32.1	-23.2	0.722741	6.5	1-3,398-396;5-13,394-386;15-22,385-378	4-4,395-395[SIL];14-14,x-x[BULq]	((((((((-(((((((((.(((&))).))))))))).))))))))	AAGCAAGG-UGGCGAGAAGCCU&AGGAUUCUUGUUAACUUUGCUU	0	0	NA	NA	NA	1	39.6024	4	0.982509	Output/R0h/cleaveLand_result/t_plot/PC-3p-110122_70_XM_021128342.1_389_TPlot.pdf	0	39.6024	-Inf	down	3.1118e-10	6.0287e-10	yes	NA	ko03013(RNA transport)
PC-3p-110122_70	XM_021130255.1	1920	1939	1931	-32.1	-21.08	0.656698	8.5	2-9,1938-1931;14-22,1928-1920	1-1,1939-1939[UP5];10-13,1930-1929[AILq]	(((((((((..--((((((((.&.))))))))....)))))))))	AAGCAAGGUCA--AAGAAUCCA&AGGAUUCUUGUUAACUUUGCUU	2	65.368	1	0.380836	Output/R8h/cleaveLand_result/t_plot/PC-3p-110122_70_XM_021130255.1_1931_TPlot.pdf	0	0	NA	NA	NA	65.368	0	Inf	up	6.2072e-16	2.71719e-15	yes	GO:0043167(ion binding);GO:0044238(primary metabolic process);GO:0019318(hexose metabolic process);GO:0043170(macromolecule metabolic process);GO:0008270(zinc ion binding);GO:0036211(protein modification process);GO:0044237(cellular metabolic process);GO:0006013(mannose metabolic process);GO:1901135(carbohydrate derivative metabolic process);GO:0016787(hydrolase activity);GO:0005996(monosaccharid…	ko00511(Other glycan degradation)
PC-3p-110122_70	XM_021131353.1	1241	1263	1254	-32.1	-23.2	0.722741	4.5	1-14,1263-1250;15-22,1248-1241	x-x,1249-1249[BULt]	((((((((.((((((((((((((&))))))))))))))-))))))))	AAGCAAGGAUUAACAAGGAUUUU&AGGAUUCUUGUUAA-CUUUGCUU	1	32.684	4	0.988687	Output/R8h/cleaveLand_result/t_plot/PC-3p-110122_70_XM_021131353.1_1254_TPlot.pdf	2	79.2048	2	0.674331	Output/R0h/cleaveLand_result/t_plot/PC-3p-110122_70_XM_021131353.1_1254_TPlot.pdf	32.684	79.2048	-1.277	down	1.092e-05	1.21603e-05	yes	GO:0006518(peptide metabolic process);GO:0016875(ligase activity, forming carbon-oxygen bonds);GO:0043043(peptide biosynthetic process);GO:0036094(small molecule binding);GO:0044249(cellular biosynthetic process);GO:0043168(anion binding);GO:0009058(biosynthetic process);GO:0043038(amino acid activation);GO:0044281(small molecule metabolic process);GO:1901576(organic substance biosynthetic proces…	ko00970(Aminoacyl-tRNA biosynthesis)
PC-3p-110122_70	XM_021139282.1	851	872	864	-32.1	-21.4	0.666667	5.5	2-8,871-865;10-18,864-856;19-22,854-851	1-1,872-872[UP5];9-9,x-x[BULq];x-x,855-855[BULt]	((((.(((((((((-(((((((.&.))))))).)))))))))-))))	AAGCUGAAGUUAAC-AGAAUCUC&AGGAUUCUUGUUAACUUU-GCUU	1	32.684	4	1	Output/R8h/cleaveLand_result/t_plot/PC-3p-110122_70_XM_021139282.1_864_TPlot.pdf	4	158.41	2	0.98824	Output/R0h/cleaveLand_result/t_plot/PC-3p-110122_70_XM_021139282.1_864_TPlot.pdf	32.684	158.41	-2.277	down	9.4249e-20	1.09066e-18	yes	GO:0005515(protein binding);GO:0008092(cytoskeletal protein binding);GO:0071840(cellular component organization or biogenesis);GO:0009987(cellular process);GO:0015631(tubulin binding);GO:0008017(microtubule binding);GO:0005488(binding);GO:0016043(cellular component organization);GO:0007010(cytoskeleton organization);GO:0006996(organelle organization)	ko03013(RNA transport)
PC-3p-110122_70	XM_021141085.1	821	843	833	-32.1	-22.3	0.694704	9.5	2-2,842-842;5-22,838-821	1-1,843-843[UP5];3-4,841-839[AILt]	((((((((((((((((((...(.&.)-..))))))))))))))))))	GAGUGAAGUUGACAAGAAGCACA&AG-GAUUCUUGUUAACUUUGCUU	0	0	NA	NA	NA	1	39.6024	4	0.999407	Output/R0h/cleaveLand_result/t_plot/PC-3p-110122_70_XM_021141085.1_833_TPlot.pdf	0	39.6024	-Inf	down	3.1118e-10	6.0287e-10	yes	GO:0043933(macromolecular complex subunit organization);GO:0044464(cell part);GO:0006461(protein complex assembly);GO:0022607(cellular component assembly);GO:0009987(cellular process);GO:0005829(cytosol);GO:0071840(cellular component organization or biogenesis);GO:0044424(intracellular part);GO:0005622(intracellular);GO:0044085(cellular component biogenesis);GO:0034622(cellular macromolecular com…	NA
PC-3p-110122_70	XM_021142149.1	446	470	462	-32.1	-21.8	0.679128	8	1-3,470-468;5-14,467-458;15-22,453-446	4-4,x-x[BULq];x-x,457-454[BULt]	((((((((....((((((((((-(((&))).))))))))))----))))))))	GAGCAAGGGAAUUUAGCAAGAA-CCU&AGGAUUCUUGUUAA----CUUUGCUU	1	32.684	4	0.999998	Output/R8h/cleaveLand_result/t_plot/PC-3p-110122_70_XM_021142149.1_462_TPlot.pdf	0	0	NA	NA	NA	32.684	0	Inf	up	1.084e-08	1.2485e-08	yes	GO:0043227(membrane-bounded organelle);GO:0043229(intracellular organelle);GO:0043226(organelle);GO:0016020(membrane);GO:0044464(cell part);GO:0043231(intracellular membrane-bounded organelle);GO:0044424(intracellular part);GO:0012505(endomembrane system);GO:0031224(intrinsic component of membrane);GO:0044444(cytoplasmic part);GO:0044425(membrane part);GO:0005737(cytoplasm);GO:0005794(Golgi appar…	ko00040(Pentose and glucuronate interconversions);ko01100(Metabolic pathways)
PC-3p-110421_70	BGI_novel_T013771	406	436	420	-39	-27.2	0.697436	18	1-7,436-430;8-12,422-418;15-24,415-406	x-x,429-423[BULt];13-14,417-416[SIL]	((((((((((..(((((.......(((((((&)))))))-------)))))..))))))))))	AGUCGUCAAAGACAGUCAAACGCCGCUCGUG&UACGAGU-------GACUGAAUUUGAUGACU	1	32.684	4	0.298821	Output/R8h/cleaveLand_result/t_plot/PC-3p-110421_70_BGI_novel_T013771_420_TPlot.pdf	0	0	NA	NA	NA	32.684	0	Inf	up	1.084e-08	1.2485e-08	yes	GO:0031224(intrinsic component of membrane);GO:0003824(catalytic activity);GO:0044425(membrane part);GO:1901363(heterocyclic compound binding);GO:0005488(binding);GO:0043167(ion binding);GO:0017076(purine nucleotide binding);GO:0016021(integral component of membrane);GO:0097159(organic cyclic compound binding);GO:0032553(ribonucleotide binding);GO:0000166(nucleotide binding);GO:0016787(hydrolase …	NA
PC-3p-110421_70	BGI_novel_T013772	406	436	420	-39	-27.2	0.697436	18	1-7,436-430;8-12,422-418;15-24,415-406	x-x,429-423[BULt];13-14,417-416[SIL]	((((((((((..(((((.......(((((((&)))))))-------)))))..))))))))))	AGUCGUCAAAGACAGUCAAACGCCGCUCGUG&UACGAGU-------GACUGAAUUUGAUGACU	1	32.684	4	0.28309	Output/R8h/cleaveLand_result/t_plot/PC-3p-110421_70_BGI_novel_T013772_420_TPlot.pdf	0	0	NA	NA	NA	32.684	0	Inf	up	1.084e-08	1.2485e-08	yes	GO:0031224(intrinsic component of membrane);GO:0003824(catalytic activity);GO:0044425(membrane part);GO:1901363(heterocyclic compound binding);GO:0005488(binding);GO:0043167(ion binding);GO:0017076(purine nucleotide binding);GO:0016021(integral component of membrane);GO:0097159(organic cyclic compound binding);GO:0032553(ribonucleotide binding);GO:0000166(nucleotide binding);GO:0016787(hydrolase …	NA
PC-3p-110421_70	XM_016096251.2	336	367	350	-39	-25.52	0.654359	23.5	3-7,365-361;10-24,350-336	1-2,367-366[UP5];8-9,360-351[AILt]	(((((((((((((((..........(((((..&..)))))--------..)))))))))))))))	AGUCAUCAAGUUCAGGAACAGCUAGACUCGAU&UACGAGU--------GACUGAAUUUGAUGACU	1	32.684	4	0.677463	Output/R8h/cleaveLand_result/t_plot/PC-3p-110421_70_XM_016096251.2_350_TPlot.pdf	0	0	NA	NA	NA	32.684	0	Inf	up	1.084e-08	1.2485e-08	yes	NA	ko04144(Endocytosis)
PC-3p-110421_70	XM_016104157.2	603	624	615	-39	-27.6	0.707692	4.5	1-17,624-608;20-24,607-603	18-19,x-x[BULq]	(((((--(((((((((((((((((&)))))))))))))))))..)))))	GGUCG--AAAUUCAGUCACUUGUG&UACGAGUGACUGAAUUUGAUGACU	1	32.684	4	0.250562	Output/R8h/cleaveLand_result/t_plot/PC-3p-110421_70_XM_016104157.2_615_TPlot.pdf	4	158.41	2	0.069655	Output/R0h/cleaveLand_result/t_plot/PC-3p-110421_70_XM_016104157.2_615_TPlot.pdf	32.684	158.41	-2.277	down	9.4249e-20	1.09066e-18	yes	NA	NA
PC-3p-110421_70	XM_021138029.1	2126	2149	2140	-39	-28.1	0.720513	10.5	5-23,2145-2127	1-4,2149-2146[UP5];24-24,2126-2126[UP3]	.(((((((((((((((((((....&....))))))))))))))))))).	UGUCAUCAGAUUUGGUCACUGCAG&UACGAGUGACUGAAUUUGAUGACU	2	65.368	1	0.000857209	Output/R8h/cleaveLand_result/t_plot/PC-3p-110421_70_XM_021138029.1_2140_TPlot.pdf	0	0	NA	NA	NA	65.368	0	Inf	up	6.2072e-16	2.71719e-15	yes	GO:0016301(kinase activity);GO:0017111(nucleoside-triphosphatase activity);GO:0097159(organic cyclic compound binding);GO:0016787(hydrolase activity);GO:0008152(metabolic process);GO:0051301(cell division);GO:0016462(pyrophosphatase activity);GO:0097367(carbohydrate derivative binding);GO:0016772(transferase activity, transferring phosphorus-containing groups);GO:0032555(purine ribonucleotide bin…	ko01100(Metabolic pathways);ko04141(Protein processing in endoplasmic reticulum);ko00510(N-Glycan biosynthesis)
PC-3p-110449_70	BGI_novel_T006116	973	996	987	-37.9	-29.2	0.770449	5	1-13,996-984;15-24,982-973	14-14,983-983[SIL]	((((((((((.(((((((((((((&))))))))))))).))))))))))	GGUGUAAUUGUCUUUAUGUGAAGU&AUUUUACAUGAAGUCGAUUGCACC	2	65.368	2	0.269742	Output/R8h/cleaveLand_result/t_plot/PC-3p-110449_70_BGI_novel_T006116_987_TPlot.pdf	0	0	NA	NA	NA	65.368	0	Inf	up	6.2072e-16	2.71719e-15	yes	GO:0008152(metabolic process)	NA
PC-3p-110449_70	XM_016107444.2	403	428	419	-37.9	-25.58	0.674934	12	1-4,428-425;7-15,422-414;18-24,409-403	5-6,424-423[SIL];16-17,413-410[AILt]	(((((((....(((((((((..((((&))))..)))))))))--..)))))))	GGUGCGAGGAGGGCUUCGUGGAGGAU&AUUUUACAUGAAGUC--GAUUGCACC	2	65.368	3	0.254323	Output/R8h/cleaveLand_result/t_plot/PC-3p-110449_70_XM_016107444.2_419_TPlot.pdf	0	0	NA	NA	NA	65.368	0	Inf	up	6.2072e-16	2.71719e-15	yes	GO:0005515(protein binding);GO:0005488(binding);GO:0019904(protein domain specific binding)	NA
PC-3p-110449_70	XM_016107445.2	368	393	384	-37.9	-25.58	0.674934	12	1-4,393-390;7-15,387-379;18-24,374-368	5-6,389-388[SIL];16-17,378-375[AILt]	(((((((....(((((((((..((((&))))..)))))))))--..)))))))	GGUGCGAGGAGGGCUUCGUGGAGGAU&AUUUUACAUGAAGUC--GAUUGCACC	4	130.736	2	0.630449	Output/R8h/cleaveLand_result/t_plot/PC-3p-110449_70_XM_016107445.2_384_TPlot.pdf	0	0	NA	NA	NA	130.736	0	Inf	up	2.8161e-30	6.66857e-29	yes	GO:0005515(protein binding);GO:0005488(binding);GO:0019904(protein domain specific binding)	NA
PC-3p-110449_70	XM_016108540.2	384	413	404	-37.9	-27.3	0.720317	17	6-18,408-396;19-24,389-384	1-5,413-409[UP5];x-x,395-390[BULt]	((((((......(((((((((((((.....&.....)))))))))))))------))))))	GGUGCGUCGCUCGUCGACUUCGUGUUCCUC&AUUUUACAUGAAGUCGAU------UGCACC	2	65.368	3	0.142129	Output/R8h/cleaveLand_result/t_plot/PC-3p-110449_70_XM_016108540.2_404_TPlot.pdf	0	0	NA	NA	NA	65.368	0	Inf	up	6.2072e-16	2.71719e-15	yes	GO:0005740(mitochondrial envelope);GO:0022900(electron transport chain);GO:0019866(organelle inner membrane);GO:0019752(carboxylic acid metabolic process);GO:0044237(cellular metabolic process);GO:0000104(succinate dehydrogenase activity);GO:0043436(oxoacid metabolic process);GO:0050662(coenzyme binding);GO:0044429(mitochondrial part);GO:1901363(heterocyclic compound binding);GO:0031090(organelle…	ko01200(Carbon metabolism);ko00190(Oxidative phosphorylation);ko01100(Metabolic pathways);ko00020(Citrate cycle (TCA cycle));ko01110(Biosynthesis of secondary metabolites)
PC-3p-110449_70	XM_021141904.1	1494	1517	1508	-37.9	-29.2	0.770449	5	1-13,1517-1505;15-24,1503-1494	14-14,1504-1504[SIL]	((((((((((.(((((((((((((&))))))))))))).))))))))))	GGUGUAAUUGUCUUUAUGUGAAGU&AUUUUACAUGAAGUCGAUUGCACC	1	32.684	4	0.597342	Output/R8h/cleaveLand_result/t_plot/PC-3p-110449_70_XM_021141904.1_1508_TPlot.pdf	0	0	NA	NA	NA	32.684	0	Inf	up	1.084e-08	1.2485e-08	yes	GO:0008152(metabolic process)	NA
PC-3p-110481_70	XM_016107171.2	466	489	480	-42.3	-29.4	0.695035	8	3-13,487-477;15-22,475-468	1-2,489-488[UP5];14-14,476-476[SIL];23-24,467-466[UP3]	..((((((((.(((((((((((..&..))))))))))).))))))))..	AAUCAGGUGCUGAUGAUUUUGCCC&ACGUAAAAUCGUCUGCACCUGAGU	1	32.684	4	0.267006	Output/R8h/cleaveLand_result/t_plot/PC-3p-110481_70_XM_016107171.2_480_TPlot.pdf	0	0	NA	NA	NA	32.684	0	Inf	up	1.084e-08	1.2485e-08	yes	GO:1901363(heterocyclic compound binding);GO:0044260(cellular macromolecule metabolic process);GO:0044267(cellular protein metabolic process);GO:0019538(protein metabolic process);GO:0009058(biosynthetic process);GO:0006413(translational initiation);GO:0043170(macromolecule metabolic process);GO:0044238(primary metabolic process);GO:0044249(cellular biosynthetic process);GO:0043603(cellular amide…	ko03022(Basal transcription factors)
PC-3p-110481_70	XM_016107172.2	381	404	395	-42.3	-29.4	0.695035	8	3-13,402-392;15-22,390-383	1-2,404-403[UP5];14-14,391-391[SIL];23-24,382-381[UP3]	..((((((((.(((((((((((..&..))))))))))).))))))))..	AAUCAGGUGCUGAUGAUUUUGCCC&ACGUAAAAUCGUCUGCACCUGAGU	2	65.368	2	0.0790337	Output/R8h/cleaveLand_result/t_plot/PC-3p-110481_70_XM_016107172.2_395_TPlot.pdf	0	0	NA	NA	NA	65.368	0	Inf	up	6.2072e-16	2.71719e-15	yes	GO:1901363(heterocyclic compound binding);GO:0044260(cellular macromolecule metabolic process);GO:0044267(cellular protein metabolic process);GO:0019538(protein metabolic process);GO:0009058(biosynthetic process);GO:0006413(translational initiation);GO:0043170(macromolecule metabolic process);GO:0044238(primary metabolic process);GO:0044249(cellular biosynthetic process);GO:0043603(cellular amide…	ko03022(Basal transcription factors)
PC-3p-113847_67	BGI_novel_T006595	1547	1571	1562	-42.2	-36	0.853081	3	1-7,1571-1565;9-17,1563-1555;18-24,1553-1547	8-8,1564-1564[SIL];x-x,1554-1554[BULt]	(((((((.(((((((((.(((((((&))))))).)))))))))-)))))))	AACUCAGCUGCAGUCGACUUCACGU&ACGUGAAAUCGACUGCA-CUGAGUU	1	32.684	4	0.18101	Output/R8h/cleaveLand_result/t_plot/PC-3p-113847_67_BGI_novel_T006595_1562_TPlot.pdf	0	0	NA	NA	NA	32.684	0	Inf	up	1.084e-08	1.2485e-08	yes	NA	NA
PC-3p-114614_66	XM_016083347.2	756	779	770	-37.3	-27.6	0.739946	9.5	4-6,776-774;8-24,772-756	1-3,779-777[UP5];7-7,773-773[SIL]	(((((((((((((((((.(((...&...))).)))))))))))))))))	GCUCUCGUGAUGAUGUUGUUAAUA&AUGUAAAGAUAUCAUCACGAGAGU	1	32.684	4	0.084924	Output/R8h/cleaveLand_result/t_plot/PC-3p-114614_66_XM_016083347.2_770_TPlot.pdf	4	158.41	2	0.0219704	Output/R0h/cleaveLand_result/t_plot/PC-3p-114614_66_XM_016083347.2_770_TPlot.pdf	32.684	158.41	-2.277	down	9.4249e-20	1.09066e-18	yes	GO:1901576(organic substance biosynthetic process);GO:0006497(protein lipidation);GO:0009987(cellular process);GO:0042158(lipoprotein biosynthetic process);GO:0009058(biosynthetic process);GO:0044260(cellular macromolecule metabolic process);GO:1901566(organonitrogen compound biosynthetic process);GO:0008152(metabolic process);GO:0043412(macromolecule modification);GO:0034645(cellular macromolecu…	NA
PC-3p-114614_66	XM_016084219.2	1864	1888	1878	-37.3	-25.6	0.686327	11.5	2-4,1887-1885;9-24,1879-1864	1-1,1888-1888[UP5];5-8,1884-1880[AILt]	((((((((((((((((.....(((.&.)))-....))))))))))))))))	ACUCUUGUGAUGAUAUGAUGGACAG&AUGU-AAAGAUAUCAUCACGAGAGU	0	0	NA	NA	NA	1	39.6024	4	0.294913	Output/R0h/cleaveLand_result/t_plot/PC-3p-114614_66_XM_016084219.2_1878_TPlot.pdf	0	39.6024	-Inf	down	3.1118e-10	6.0287e-10	yes	NA	NA
PC-3p-114614_66	XM_016086824.2	1920	1947	1934	-37.3	-25.06	0.67185	16	2-5,1946-1943;8-23,1936-1921	1-1,1947-1947[UP5];6-7,1942-1937[AILt];24-24,1920-1920[UP3]	.((((((((((((((((......((((.&.))))----..)))))))))))))))).	UCUCUUGUGGUGAUGUCAAAAGGUACAC&AUGUA----AAGAUAUCAUCACGAGAGU	0	0	NA	NA	NA	1	39.6024	4	0.622709	Output/R0h/cleaveLand_result/t_plot/PC-3p-114614_66_XM_016086824.2_1934_TPlot.pdf	0	39.6024	-Inf	down	3.1118e-10	6.0287e-10	yes	GO:0022604(regulation of cell morphogenesis);GO:0017076(purine nucleotide binding);GO:0018193(peptidyl-amino acid modification);GO:0007267(cell-cell signaling);GO:0050793(regulation of developmental process);GO:0006796(phosphate-containing compound metabolic process);GO:0003824(catalytic activity);GO:0018209(peptidyl-serine modification);GO:0006464(cellular protein modification process);GO:006500…	NA
PC-3p-114614_66	XM_016114267.2	973	996	987	-37.3	-25.2	0.675603	8.5	3-5,994-992;8-17,989-980;19-24,978-973	1-2,996-995[UP5];6-7,991-990[SIL];18-18,979-979[SIL]	((((((.((((((((((..(((..&..)))..)))))))))).))))))	GCUCUCAUGAUGAUAUCACUACUC&AUGUAAAGAUAUCAUCACGAGAGU	2	65.368	2	0.241896	Output/R8h/cleaveLand_result/t_plot/PC-3p-114614_66_XM_016114267.2_987_TPlot.pdf	0	0	NA	NA	NA	65.368	0	Inf	up	6.2072e-16	2.71719e-15	yes	NA	NA
PC-3p-114614_66	XM_021125111.1	1589	1612	1603	-37.3	-25.4	0.680965	16	8-18,1605-1595;20-24,1593-1589	1-7,1612-1606[UP5];19-19,1594-1594[SIL]	(((((.(((((((((((.......&.......))))))))))).)))))	ACUCUGGUGAUGGUGUCACUCAUG&AUGUAAAGAUAUCAUCACGAGAGU	0	0	NA	NA	NA	1	39.6024	4	0.332762	Output/R0h/cleaveLand_result/t_plot/PC-3p-114614_66_XM_021125111.1_1603_TPlot.pdf	0	39.6024	-Inf	down	3.1118e-10	6.0287e-10	yes	GO:0097367(carbohydrate derivative binding);GO:0044464(cell part);GO:0050789(regulation of biological process);GO:0051130(positive regulation of cellular component organization);GO:0036094(small molecule binding);GO:0044430(cytoskeletal part);GO:0030029(actin filament-based process);GO:0044089(positive regulation of cellular component biogenesis);GO:0043228(non-membrane-bounded organelle);GO:0033…	NA
PC-3p-114792_66	BGI_novel_T001355	264	291	282	-48.5	-32.9	0.678351	10.5	2-4,290-288;7-14,285-278;15-18,274-271;19-24,269-264	1-1,291-291[UP5];5-6,287-286[SIL];x-x,277-275[BULt];x-x,270-270[BULt]	((((((.((((...((((((((..(((.&.)))..))))))))---))))-))))))	GGUGCGAGUCGGAAGCUUCAGGGAGAGA&ACUUCACCUGAAGU---CGAC-CGCACC	1	32.684	4	0.497318	Output/R8h/cleaveLand_result/t_plot/PC-3p-114792_66_BGI_novel_T001355_282_TPlot.pdf	0	0	NA	NA	NA	32.684	0	Inf	up	1.084e-08	1.2485e-08	yes	GO:2000112(regulation of cellular macromolecule biosynthetic process);GO:0044464(cell part);GO:0051246(regulation of protein metabolic process);GO:0044248(cellular catabolic process);GO:0043228(non-membrane-bounded organelle);GO:0005737(cytoplasm);GO:0019439(aromatic compound catabolic process);GO:0006139(nucleobase-containing compound metabolic process);GO:0043170(macromolecule metabolic process…	ko03018(RNA degradation)
PC-3p-114792_66	BGI_novel_T002927	2067	2093	2082	-48.5	-32.8	0.676289	8.5	1-5,2093-2089;6-9,2087-2084;11-21,2081-2071;22-24,2069-2067	x-x,2088-2088[BULt];10-10,2083-2082[AILt];x-x,2070-2070[BULt]	(((.(((((((((((..((((.(((((&)))))-))))-.)))))))))))-)))	GGUGGCGGUCGAUUUGGAGGUAGGAGU&ACUUC-ACCU-GAAGUCGACCGC-ACC	1	32.684	4	0.569629	Output/R8h/cleaveLand_result/t_plot/PC-3p-114792_66_BGI_novel_T002927_2082_TPlot.pdf	0	0	NA	NA	NA	32.684	0	Inf	up	1.084e-08	1.2485e-08	yes	GO:1901265(nucleoside phosphate binding);GO:0097159(organic cyclic compound binding);GO:1901363(heterocyclic compound binding);GO:0005488(binding);GO:0000166(nucleotide binding);GO:0036094(small molecule binding);GO:0003676(nucleic acid binding)	NA
PC-3p-114792_66	XM_016089737.2	1607	1637	1622	-48.5	-34.5	0.71134	15	1-7,1637-1631;8-22,1624-1610;23-24,1608-1607	x-x,1630-1625[BULt];x-x,1609-1609[BULt]	((.(((((((((((((((......(((((((&)))))))------)))))))))))))))-))	GGUUGUGGUUGACUUCAGUCAUUUGUGAGGU&ACUUCAC------CUGAAGUCGACCGCA-CC	1	32.684	4	0.250562	Output/R8h/cleaveLand_result/t_plot/PC-3p-114792_66_XM_016089737.2_1622_TPlot.pdf	0	0	NA	NA	NA	32.684	0	Inf	up	1.084e-08	1.2485e-08	yes	GO:0009059(macromolecule biosynthetic process);GO:0071704(organic substance metabolic process);GO:0009058(biosynthetic process);GO:0071840(cellular component organization or biogenesis);GO:0044264(cellular polysaccharide metabolic process);GO:0005976(polysaccharide metabolic process);GO:0071555(cell wall organization);GO:0009987(cellular process);GO:0044425(membrane part);GO:0071554(cell wall org…	NA
PC-3p-115095_65	BGI_novel_T001871	1403	1428	1416	-39.4	-26.4	0.670051	11	2-8,1427-1421;9-20,1417-1406;22-23,1404-1403	1-1,1428-1428[UP5];x-x,1420-1418[BULt];21-21,1405-1405[SIL]	((.((((((((((((...(((((((.&.)))))))---)))))))))))).))	GAGAUGGAUUGGACCUAUCUCCGGUC&AAUCGGAG---GGUCCAAUUUGUGUU	1	32.684	4	0.985236	Output/R8h/cleaveLand_result/t_plot/PC-3p-115095_65_BGI_novel_T001871_1416_TPlot.pdf	0	0	NA	NA	NA	32.684	0	Inf	up	1.084e-08	1.2485e-08	yes	NA	NA
PC-3p-115095_65	XM_016086346.2	1533	1555	1546	-39.4	-26.6	0.675127	6.5	2-18,1554-1538;21-23,1535-1533	1-1,1555-1555[UP5];19-20,1537-1536[SIL]	(((..(((((((((((((((((.&.)))))))))))))))))..)))	GACCAAGGUUGGAUCCUUCGAUG&AAUCGGAGGGUCCAAUUUGUGUU	0	0	NA	NA	NA	3	118.807	2	0.557986	Output/R0h/cleaveLand_result/t_plot/PC-3p-115095_65_XM_016086346.2_1546_TPlot.pdf	0	118.807	-Inf	down	1.1501e-27	2.01922e-26	yes	GO:1901576(organic substance biosynthetic process);GO:0016053(organic acid biosynthetic process);GO:0009987(cellular process);GO:0008652(cellular amino acid biosynthetic process);GO:0016614(oxidoreductase activity, acting on CH-OH group of donors);GO:1901607(alpha-amino acid biosynthetic process);GO:0006520(cellular amino acid metabolic process);GO:0009069(serine family amino acid metabolic proce…	ko01230(Biosynthesis of amino acids);ko01100(Metabolic pathways);ko01200(Carbon metabolism);ko00260(Glycine, serine and threonine metabolism)
PC-3p-115095_65	XM_016086355.2	854	880	871	-39.4	-28.7	0.728426	6.5	1-14,880-867;15-23,862-854	x-x,866-863[BULt]	(((((((((....((((((((((((((&))))))))))))))----)))))))))	AAUAUAAGUGGGAUGGAUCCUCCGAUU&AAUCGGAGGGUCCA----AUUUGUGUU	1	32.684	4	0.711331	Output/R8h/cleaveLand_result/t_plot/PC-3p-115095_65_XM_016086355.2_871_TPlot.pdf	1	39.6024	4	0.642962	Output/R0h/cleaveLand_result/t_plot/PC-3p-115095_65_XM_016086355.2_871_TPlot.pdf	32.684	39.6024	-0.277003	down	0.4158	0.417305	yes	NA	NA
PC-3p-115095_65	XM_016088755.2	1759	1781	1772	-39.4	-30.3	0.769036	10	5-17,1777-1765;19-22,1763-1760	1-4,1781-1778[UP5];18-18,1764-1764[SIL];23-23,1759-1759[UP3]	.((((.(((((((((((((....&....))))))))))))).)))).	UGCACCAGUUGGACCCUCCAAUG&AAUCGGAGGGUCCAAUUUGUGUU	0	0	NA	NA	NA	1	39.6024	4	0.152548	Output/R0h/cleaveLand_result/t_plot/PC-3p-115095_65_XM_016088755.2_1772_TPlot.pdf	0	39.6024	-Inf	down	3.1118e-10	6.0287e-10	yes	GO:0044237(cellular metabolic process);GO:0009987(cellular process);GO:0006793(phosphorus metabolic process);GO:0016772(transferase activity, transferring phosphorus-containing groups);GO:0016301(kinase activity);GO:0016310(phosphorylation);GO:0008152(metabolic process);GO:0006796(phosphate-containing compound metabolic process);GO:0016740(transferase activity);GO:0003824(catalytic activity);GO:0…	NA
PC-3p-115095_65	XM_016092063.2	914	936	927	-39.4	-25.7	0.652284	8.5	1-4,936-933;6-15,931-922;18-20,919-917	5-5,932-932[SIL];16-17,921-920[SIL];21-23,916-914[UP3]	...(((..((((((((((.((((&)))).))))))))))..)))...	UGAGCAUCUUGGACCCUUGGAUU&AAUCGGAGGGUCCAAUUUGUGUU	0	0	NA	NA	NA	1	39.6024	4	0.998399	Output/R0h/cleaveLand_result/t_plot/PC-3p-115095_65_XM_016092063.2_927_TPlot.pdf	0	39.6024	-Inf	down	3.1118e-10	6.0287e-10	yes	GO:0072528(pyrimidine-containing compound biosynthetic process);GO:0006139(nucleobase-containing compound metabolic process);GO:1901293(nucleoside phosphate biosynthetic process);GO:0006221(pyrimidine nucleotide biosynthetic process);GO:0097159(organic cyclic compound binding);GO:0005622(intracellular);GO:0016772(transferase activity, transferring phosphorus-containing groups);GO:0034641(cellular…	ko00240(Pyrimidine metabolism);ko01100(Metabolic pathways)
PC-3p-115095_65	XM_016095082.2	319	343	334	-39.4	-27.2	0.690355	9	2-5,342-339;7-16,337-328;17-23,325-319	1-1,343-343[UP5];6-6,338-338[SIL];x-x,327-326[BULt]	(((((((..((((((((((.((((.&.)))).))))))))))--)))))))	GGCGCAAAGGUUGGGCCUUGCGAUC&AAUCGGAGGGUCCAAU--UUGUGUU	1	32.684	4	0.898253	Output/R8h/cleaveLand_result/t_plot/PC-3p-115095_65_XM_016095082.2_334_TPlot.pdf	0	0	NA	NA	NA	32.684	0	Inf	up	1.084e-08	1.2485e-08	yes	GO:0043231(intracellular membrane-bounded organelle);GO:0044424(intracellular part);GO:0043169(cation binding);GO:0005634(nucleus);GO:0003676(nucleic acid binding);GO:0010468(regulation of gene expression);GO:2000112(regulation of cellular macromolecule biosynthetic process);GO:0005623(cell);GO:0044464(cell part);GO:2001141(regulation of RNA biosynthetic process);GO:0065007(biological regulation)…	NA
PC-3p-115095_65	XM_016095084.2	365	389	380	-39.4	-27.2	0.690355	9	2-5,388-385;7-16,383-374;17-23,371-365	1-1,389-389[UP5];6-6,384-384[SIL];x-x,373-372[BULt]	(((((((..((((((((((.((((.&.)))).))))))))))--)))))))	GGCGCAAAGGUUGGGCCUUGCGAUC&AAUCGGAGGGUCCAAU--UUGUGUU	1	32.684	4	0.883765	Output/R8h/cleaveLand_result/t_plot/PC-3p-115095_65_XM_016095084.2_380_TPlot.pdf	0	0	NA	NA	NA	32.684	0	Inf	up	1.084e-08	1.2485e-08	yes	GO:0043231(intracellular membrane-bounded organelle);GO:0044424(intracellular part);GO:0043169(cation binding);GO:0005634(nucleus);GO:0003676(nucleic acid binding);GO:0010468(regulation of gene expression);GO:2000112(regulation of cellular macromolecule biosynthetic process);GO:0005623(cell);GO:0044464(cell part);GO:2001141(regulation of RNA biosynthetic process);GO:0065007(biological regulation)…	NA
PC-3p-115095_65	XM_016095087.2	319	343	334	-39.4	-27.2	0.690355	9	2-5,342-339;7-16,337-328;17-23,325-319	1-1,343-343[UP5];6-6,338-338[SIL];x-x,327-326[BULt]	(((((((..((((((((((.((((.&.)))).))))))))))--)))))))	GGCGCAAAGGUUGGGCCUUGCGAUC&AAUCGGAGGGUCCAAU--UUGUGUU	0	0	NA	NA	NA	1	39.6024	4	0.835089	Output/R0h/cleaveLand_result/t_plot/PC-3p-115095_65_XM_016095087.2_334_TPlot.pdf	0	39.6024	-Inf	down	3.1118e-10	6.0287e-10	yes	GO:0043231(intracellular membrane-bounded organelle);GO:0044424(intracellular part);GO:0043169(cation binding);GO:0005634(nucleus);GO:0003676(nucleic acid binding);GO:0010468(regulation of gene expression);GO:2000112(regulation of cellular macromolecule biosynthetic process);GO:0005623(cell);GO:0044464(cell part);GO:2001141(regulation of RNA biosynthetic process);GO:0065007(biological regulation)…	NA
PC-3p-115095_65	XM_016095093.2	457	481	472	-39.4	-25.98	0.659391	11.5	4-13,478-469;16-22,464-458	1-3,481-479[UP5];14-15,468-465[AILt];23-23,457-457[UP3]	.(((((((....((((((((((...&...))))))))))--..))))))).	UACACAAGGGCAGGACCCUCUGUUU&AAUCGGAGGGUCC--AAUUUGUGUU	0	0	NA	NA	NA	2	79.2048	3	0.334735	Output/R0h/cleaveLand_result/t_plot/PC-3p-115095_65_XM_016095093.2_472_TPlot.pdf	0	79.2048	-Inf	down	5.5905e-19	3.89431e-18	yes	GO:0019222(regulation of metabolic process);GO:0000079(regulation of cyclin-dependent protein serine/threonine kinase activity);GO:0050790(regulation of catalytic activity);GO:0051174(regulation of phosphorus metabolic process);GO:1904029(regulation of cyclin-dependent protein kinase activity);GO:0051171(regulation of nitrogen compound metabolic process);GO:0031399(regulation of protein modificat…	ko01110(Biosynthesis of secondary metabolites);ko00630(Glyoxylate and dicarboxylate metabolism);ko01200(Carbon metabolism);ko01210(2-Oxocarboxylic acid metabolism);ko01100(Metabolic pathways);ko01230(Biosynthesis of amino acids);ko00020(Citrate cycle (TCA cycle))
PC-3p-115095_65	XM_016101439.2	333	354	345	-39.4	-28.8	0.730964	7	1-13,354-342;17-21,339-335	14-16,341-340[AILq];22-23,334-333[UP3]	..(((((..-(((((((((((((&)))))))))))))...)))))..	GCCACGGCG-GGGCCCUCCGAUU&AAUCGGAGGGUCCAAUUUGUGUU	1	32.684	4	0.691463	Output/R8h/cleaveLand_result/t_plot/PC-3p-115095_65_XM_016101439.2_345_TPlot.pdf	0	0	NA	NA	NA	32.684	0	Inf	up	1.084e-08	1.2485e-08	yes	GO:0008270(zinc ion binding);GO:0043167(ion binding);GO:0031224(intrinsic component of membrane);GO:0044425(membrane part);GO:0005488(binding);GO:0046872(metal ion binding);GO:0043169(cation binding);GO:0016021(integral component of membrane);GO:0016020(membrane);GO:0046914(transition metal ion binding)	ko04141(Protein processing in endoplasmic reticulum)
PC-3p-115095_65	XM_016101888.2	1573	1603	1590	-39.4	-27	0.685279	14.5	2-9,1602-1595;10-15,1590-1585;16-23,1580-1573	1-1,1603-1603[UP5];x-x,1594-1591[BULt];x-x,1584-1581[BULt]	((((((((....((((((....((((((((.&.))))))))----))))))----))))))))	GACACAGGAGACUUGGACUAUACCUCCGAUC&AAUCGGAGG----GUCCAA----UUUGUGUU	0	0	NA	NA	NA	2	79.2048	2	0.469076	Output/R0h/cleaveLand_result/t_plot/PC-3p-115095_65_XM_016101888.2_1590_TPlot.pdf	0	79.2048	-Inf	down	5.5905e-19	3.89431e-18	yes	GO:0005975(carbohydrate metabolic process);GO:0004553(hydrolase activity, hydrolyzing O-glycosyl compounds);GO:0008152(metabolic process);GO:0044238(primary metabolic process);GO:0005576(extracellular region);GO:0009987(cellular process);GO:0071555(cell wall organization);GO:0016043(cellular component organization);GO:0071554(cell wall organization or biogenesis);GO:0071840(cellular component org…	ko01100(Metabolic pathways);ko00040(Pentose and glucuronate interconversions)
PC-3p-115095_65	XM_016108308.2	308	332	322	-39.4	-25.9	0.65736	9.5	3-8,330-325;9-13,323-319;16-19,316-313;20-23,311-308	1-2,332-331[UP5];x-x,324-324[BULt];14-15,318-317[SIL];x-x,312-312[BULt]	((((.((((..(((((.((((((..&..))))))-)))))..))))-))))	GGCGUCAAAGAGGACCUCUCCGAGC&AAUCGGAG-GGUCCAAUUUG-UGUU	0	0	NA	NA	NA	1	39.6024	4	0.995347	Output/R0h/cleaveLand_result/t_plot/PC-3p-115095_65_XM_016108308.2_322_TPlot.pdf	0	39.6024	-Inf	down	3.1118e-10	6.0287e-10	yes	NA	NA
PC-3p-115095_65	XM_016108425.2	1002	1024	1015	-39.4	-25.7	0.652284	12.5	6-9,1019-1016;11-23,1014-1002	1-5,1024-1020[UP5];10-10,1015-1015[SIL]	(((((((((((((.((((.....&.....)))).)))))))))))))	GACACAAAUUGGAGUCUCGUAUG&AAUCGGAGGGUCCAAUUUGUGUU	0	0	NA	NA	NA	1	39.6024	4	0.998539	Output/R0h/cleaveLand_result/t_plot/PC-3p-115095_65_XM_016108425.2_1015_TPlot.pdf	0	39.6024	-Inf	down	3.1118e-10	6.0287e-10	yes	GO:0008194(UDP-glycosyltransferase activity);GO:0016758(transferase activity, transferring hexosyl groups);GO:0042285(xylosyltransferase activity);GO:0044038(cell wall macromolecule biosynthetic process);GO:0005976(polysaccharide metabolic process);GO:0009059(macromolecule biosynthetic process);GO:0005975(carbohydrate metabolic process);GO:0016763(transferase activity, transferring pentosyl group…	NA
PC-3p-115095_65	XM_021134214.1	1549	1571	1562	-39.4	-30.3	0.769036	10	5-17,1567-1555;19-22,1553-1550	1-4,1571-1568[UP5];18-18,1554-1554[SIL];23-23,1549-1549[UP3]	.((((.(((((((((((((....&....))))))))))))).)))).	UGCACCAGUUGGACCCUCCAAUG&AAUCGGAGGGUCCAAUUUGUGUU	0	0	NA	NA	NA	1	39.6024	4	0.167992	Output/R0h/cleaveLand_result/t_plot/PC-3p-115095_65_XM_021134214.1_1562_TPlot.pdf	0	39.6024	-Inf	down	3.1118e-10	6.0287e-10	yes	GO:0044237(cellular metabolic process);GO:0009987(cellular process);GO:0006793(phosphorus metabolic process);GO:0016772(transferase activity, transferring phosphorus-containing groups);GO:0016301(kinase activity);GO:0016310(phosphorylation);GO:0008152(metabolic process);GO:0006796(phosphate-containing compound metabolic process);GO:0016740(transferase activity);GO:0003824(catalytic activity);GO:0…	NA
PC-3p-115095_65	XM_021135595.1	879	899	890	-39.4	-26.9	0.682741	7	2-10,898-890;12-14,889-887;16-22,886-880	1-1,899-899[UP5];11-11,x-x[BULq];15-15,x-x[BULq];23-23,879-879[UP3]	.(((((((-(((-(((((((((.&.))))))))).))).))))))).	UGCACAAG-UGG-CCCUUCGAUG&AAUCGGAGGGUCCAAUUUGUGUU	1	32.684	4	0.937549	Output/R8h/cleaveLand_result/t_plot/PC-3p-115095_65_XM_021135595.1_890_TPlot.pdf	0	0	NA	NA	NA	32.684	0	Inf	up	1.084e-08	1.2485e-08	yes	GO:0003824(catalytic activity);GO:0055114(oxidation-reduction process);GO:0016491(oxidoreductase activity);GO:0008152(metabolic process)	ko00790(Folate biosynthesis);ko00561(Glycerolipid metabolism);ko01100(Metabolic pathways);ko00040(Pentose and glucuronate interconversions);ko00051(Fructose and mannose metabolism);ko00052(Galactose metabolism)
PC-3p-115095_65	XM_021138495.1	3237	3258	3249	-39.4	-27	0.685279	9.5	4-14,3255-3245;16-18,3244-3242;20-23,3240-3237	1-3,3258-3256[UP5];15-15,x-x[BULq];19-19,3241-3241[SIL]	((((.(((-(((((((((((...&...))))))))))).))).))))	GACAGAGG-UGGACCCUCUGGAG&AAUCGGAGGGUCCAAUUUGUGUU	1	32.684	4	0.923747	Output/R8h/cleaveLand_result/t_plot/PC-3p-115095_65_XM_021138495.1_3249_TPlot.pdf	0	0	NA	NA	NA	32.684	0	Inf	up	1.084e-08	1.2485e-08	yes	GO:0003723(RNA binding);GO:0097159(organic cyclic compound binding);GO:1901363(heterocyclic compound binding);GO:0005488(binding);GO:0003676(nucleic acid binding)	ko03013(RNA transport);ko03015(mRNA surveillance pathway)
PC-3p-115095_65	XM_021138496.1	3172	3193	3184	-39.4	-27	0.685279	9.5	4-14,3190-3180;16-18,3179-3177;20-23,3175-3172	1-3,3193-3191[UP5];15-15,x-x[BULq];19-19,3176-3176[SIL]	((((.(((-(((((((((((...&...))))))))))).))).))))	GACAGAGG-UGGACCCUCUGGAG&AAUCGGAGGGUCCAAUUUGUGUU	1	32.684	4	0.922036	Output/R8h/cleaveLand_result/t_plot/PC-3p-115095_65_XM_021138496.1_3184_TPlot.pdf	0	0	NA	NA	NA	32.684	0	Inf	up	1.084e-08	1.2485e-08	yes	GO:0003723(RNA binding);GO:0097159(organic cyclic compound binding);GO:1901363(heterocyclic compound binding);GO:0005488(binding);GO:0003676(nucleic acid binding)	ko03013(RNA transport);ko03015(mRNA surveillance pathway)
PC-3p-116071_65	BGI_novel_T001056	1573	1596	1587	-37.3	-24.54	0.657909	13	1-3,1596-1594;9-24,1588-1573	4-8,1593-1589[SIL]	((((((((((((((((.....(((&))).....))))))))))))))))	AGUUUAAGGGGCUAGUUGAUGUGU&AUAAAAAUACUGGCCUCUUAGACU	0	0	NA	NA	NA	1	39.6024	4	0.642962	Output/R0h/cleaveLand_result/t_plot/PC-3p-116071_65_BGI_novel_T001056_1587_TPlot.pdf	0	39.6024	-Inf	down	3.1118e-10	6.0287e-10	yes	GO:0006412(translation);GO:0043170(macromolecule metabolic process);GO:0005737(cytoplasm);GO:0044271(cellular nitrogen compound biosynthetic process);GO:0034645(cellular macromolecule biosynthetic process);GO:0044422(organelle part);GO:0043604(amide biosynthetic process);GO:0006810(transport);GO:0005740(mitochondrial envelope);GO:0005215(transporter activity);GO:0005743(mitochondrial inner membra…	NA
PC-3p-116071_65	XM_016081948.2	924	947	938	-37.3	-24.54	0.657909	13	1-3,947-945;9-24,939-924	4-8,944-940[SIL]	((((((((((((((((.....(((&))).....))))))))))))))))	AGUUUAAGGGGCUAGUUGAUGUGU&AUAAAAAUACUGGCCUCUUAGACU	0	0	NA	NA	NA	1	39.6024	4	0.649468	Output/R0h/cleaveLand_result/t_plot/PC-3p-116071_65_XM_016081948.2_938_TPlot.pdf	0	39.6024	-Inf	down	3.1118e-10	6.0287e-10	yes	GO:0006412(translation);GO:0043170(macromolecule metabolic process);GO:0005737(cytoplasm);GO:0044271(cellular nitrogen compound biosynthetic process);GO:0034645(cellular macromolecule biosynthetic process);GO:0044422(organelle part);GO:0043604(amide biosynthetic process);GO:0006810(transport);GO:0005740(mitochondrial envelope);GO:0005215(transporter activity);GO:0005743(mitochondrial inner membra…	NA
PC-3p-116071_65	XM_016096891.2	330	351	342	-37.3	-24.6	0.659517	11.5	6-18,346-334;21-24,333-330	1-5,351-347[UP5];19-20,x-x[BULq]	((((--(((((((((((((.....&.....)))))))))))))..))))	AGUU--AGAGGCCAGUAUUAUUUU&AUAAAAAUACUGGCCUCUUAGACU	2	65.368	2	0.33745	Output/R8h/cleaveLand_result/t_plot/PC-3p-116071_65_XM_016096891.2_342_TPlot.pdf	0	0	NA	NA	NA	65.368	0	Inf	up	6.2072e-16	2.71719e-15	yes	GO:0005618(cell wall);GO:0044444(cytoplasmic part);GO:0004565(beta-galactosidase activity);GO:0044464(cell part);GO:0005737(cytoplasm);GO:0015925(galactosidase activity);GO:0030312(external encapsulating structure);GO:0030246(carbohydrate binding);GO:0016787(hydrolase activity);GO:0016798(hydrolase activity, acting on glycosyl bonds);GO:0005623(cell);GO:0043227(membrane-bounded organelle);GO:0003…	ko00600(Sphingolipid metabolism);ko00604(Glycosphingolipid biosynthesis - ganglio series);ko01100(Metabolic pathways);ko00531(Glycosaminoglycan degradation);ko00511(Other glycan degradation);ko00052(Galactose metabolism)
PC-3p-116071_65	XM_016102029.2	849	872	863	-37.3	-26.4	0.707775	12.5	6-18,867-855;20-23,853-850	1-5,872-868[UP5];19-19,854-854[SIL];24-24,849-849[UP3]	.((((.(((((((((((((.....&.....))))))))))))).)))).	CGUUUCAGAGGCCAGUGUUGUGUA&AUAAAAAUACUGGCCUCUUAGACU	0	0	NA	NA	NA	1	39.6024	4	0.152548	Output/R0h/cleaveLand_result/t_plot/PC-3p-116071_65_XM_016102029.2_863_TPlot.pdf	0	39.6024	-Inf	down	3.1118e-10	6.0287e-10	yes	GO:0046903(secretion);GO:0051640(organelle localization);GO:0006904(vesicle docking involved in exocytosis);GO:0051234(establishment of localization);GO:0048278(vesicle docking);GO:0032940(secretion by cell);GO:0006887(exocytosis);GO:0009987(cellular process);GO:0140056(organelle localization by membrane tethering);GO:0016192(vesicle-mediated transport);GO:0051641(cellular localization);GO:002240…	NA
PC-3p-117208_64	BGI_novel_T002867	368	392	383	-39.9	-26	0.651629	16	8-14,385-379;15-24,377-368	1-7,392-386[UP5];x-x,378-378[BULt]	((((((((((.(((((((.......&.......)))))))-))))))))))	GUUGAUGGCUAGAGGGUCAAUUAGA&AUUUAACGACUCUC-GGCUAUCAAC	1	32.684	4	0.981154	Output/R8h/cleaveLand_result/t_plot/PC-3p-117208_64_BGI_novel_T002867_383_TPlot.pdf	0	0	NA	NA	NA	32.684	0	Inf	up	1.084e-08	1.2485e-08	yes	GO:0005840(ribosome);GO:0030529(intracellular ribonucleoprotein complex);GO:0005622(intracellular);GO:0032991(macromolecular complex);GO:0005737(cytoplasm);GO:1990904(ribonucleoprotein complex);GO:0043232(intracellular non-membrane-bounded organelle);GO:0044424(intracellular part);GO:0043229(intracellular organelle);GO:0005623(cell);GO:0044444(cytoplasmic part);GO:0043226(organelle);GO:0044464(ce…	ko03010(Ribosome)
PC-3p-117208_64	BGI_novel_T011360	1213	1238	1229	-39.9	-26.1	0.654135	9.5	1-6,1238-1233;9-15,1230-1224;16-24,1221-1213	7-8,1232-1231[SIL];x-x,1223-1222[BULt]	(((((((((..(((((((..((((((&))))))..)))))))--)))))))))	GUUGAUGGCGACGAGGGUGAUUGGAU&AUUUAACGACUCUCG--GCUAUCAAC	0	0	NA	NA	NA	1	39.6024	4	0.956929	Output/R0h/cleaveLand_result/t_plot/PC-3p-117208_64_BGI_novel_T011360_1229_TPlot.pdf	0	39.6024	-Inf	down	3.1118e-10	6.0287e-10	yes	GO:0016070(RNA metabolic process);GO:0032501(multicellular organismal process);GO:0044424(intracellular part);GO:0048229(gametophyte development);GO:0006139(nucleobase-containing compound metabolic process);GO:0010467(gene expression);GO:0034641(cellular nitrogen compound metabolic process);GO:0008152(metabolic process);GO:0006396(RNA processing);GO:1901360(organic cyclic compound metabolic proce…	ko03008(Ribosome biogenesis in eukaryotes)
PC-3p-117208_64	XM_016086718.2	235	258	250	-39.9	-27.4	0.686717	7.5	2-8,257-251;10-18,250-242;20-24,239-235	1-1,258-258[UP5];9-9,x-x[BULq];19-19,241-240[AILt]	(((((..(((((((((-(((((((.&.))))))).)))))))))-.)))))	GUUGAGCAGCUGAGGG-CGUUGAAG&AUUUAACGACUCUCGGCU-AUCAAC	1	32.684	4	0.900485	Output/R8h/cleaveLand_result/t_plot/PC-3p-117208_64_XM_016086718.2_250_TPlot.pdf	1	39.6024	4	0.852318	Output/R0h/cleaveLand_result/t_plot/PC-3p-117208_64_XM_016086718.2_250_TPlot.pdf	32.684	39.6024	-0.277003	down	0.4158	0.417305	yes	GO:0032991(macromolecular complex);GO:0005488(binding);GO:0016272(prefoldin complex);GO:0009987(cellular process);GO:0043234(protein complex);GO:0051082(unfolded protein binding);GO:0006457(protein folding);GO:0005515(protein binding)	NA
PC-3p-117208_64	XM_016087891.2	1647	1670	1661	-39.9	-32.9	0.824561	2.5	1-16,1670-1655;18-24,1653-1647	17-17,1654-1654[SIL]	(((((((.((((((((((((((((&)))))))))))))))).)))))))	GUUGAUAUCUGAGAGUCGUUAGAU&AUUUAACGACUCUCGGCUAUCAAC	6	196.104	2	0.106198	Output/R8h/cleaveLand_result/t_plot/PC-3p-117208_64_XM_016087891.2_1661_TPlot.pdf	1	39.6024	4	0.241088	Output/R0h/cleaveLand_result/t_plot/PC-3p-117208_64_XM_016087891.2_1661_TPlot.pdf	196.104	39.6024	2.30796	up	2.1018e-24	3.51295e-23	yes	GO:0006807(nitrogen compound metabolic process);GO:0006508(proteolysis);GO:0044238(primary metabolic process);GO:0019538(protein metabolic process);GO:0030163(protein catabolic process);GO:1901564(organonitrogen compound metabolic process);GO:0008233(peptidase activity);GO:0003824(catalytic activity);GO:0004175(endopeptidase activity);GO:0070001(aspartic-type peptidase activity);GO:1901565(organo…	ko03010(Ribosome)
PC-3p-117208_64	XM_016102742.2	1314	1337	1328	-39.9	-27.4	0.686717	9.5	1-3,1337-1335;5-19,1333-1319	4-4,1334-1334[SIL];20-24,1318-1314[UP3]	.....(((((((((((((((.(((&))).))))))))))))))).....	CGUCUUGGCCGAGGGUCGUUUGAU&AUUUAACGACUCUCGGCUAUCAAC	4	130.736	3	0.207167	Output/R8h/cleaveLand_result/t_plot/PC-3p-117208_64_XM_016102742.2_1328_TPlot.pdf	4	158.41	3	0.138852	Output/R0h/cleaveLand_result/t_plot/PC-3p-117208_64_XM_016102742.2_1328_TPlot.pdf	130.736	158.41	-0.277003	down	0.10362	0.110863	yes	GO:0004013(adenosylhomocysteinase activity);GO:0034641(cellular nitrogen compound metabolic process);GO:0044281(small molecule metabolic process);GO:0044238(primary metabolic process);GO:0009116(nucleoside metabolic process);GO:0006534(cysteine metabolic process);GO:0071704(organic substance metabolic process);GO:0046128(purine ribonucleoside metabolic process);GO:0019752(carboxylic acid metaboli…	ko00270(Cysteine and methionine metabolism);ko01100(Metabolic pathways)
PC-3p-117208_64	XM_016115853.2	891	918	909	-39.9	-26.6	0.666667	12	3-13,916-906;14-23,901-892	1-2,918-917[UP5];x-x,905-902[BULt];24-24,891-891[UP3]	.((((((((((....(((((((((((..&..)))))))))))----)))))))))).	CUUGGUGGCCGGAAAAGGGUUGUUGAGA&AUUUAACGACUCU----CGGCUAUCAAC	2	65.368	2	0.598736	Output/R8h/cleaveLand_result/t_plot/PC-3p-117208_64_XM_016115853.2_909_TPlot.pdf	0	0	NA	NA	NA	65.368	0	Inf	up	6.2072e-16	2.71719e-15	yes	GO:0044248(cellular catabolic process);GO:0009987(cellular process);GO:0098754(detoxification);GO:0042221(response to chemical);GO:0043167(ion binding);GO:0016684(oxidoreductase activity, acting on peroxide as acceptor);GO:0055114(oxidation-reduction process);GO:0004601(peroxidase activity);GO:0016209(antioxidant activity);GO:0006950(response to stress);GO:0098869(cellular oxidant detoxification)…	ko01100(Metabolic pathways);ko00940(Phenylpropanoid biosynthesis);ko01110(Biosynthesis of secondary metabolites)
PC-3p-117208_64	XM_021132296.1	1145	1170	1161	-39.9	-26.1	0.654135	9.5	1-6,1170-1165;9-15,1162-1156;16-24,1153-1145	7-8,1164-1163[SIL];x-x,1155-1154[BULt]	(((((((((..(((((((..((((((&))))))..)))))))--)))))))))	GUUGAUGGCGACGAGGGUGAUUGGAU&AUUUAACGACUCUCG--GCUAUCAAC	0	0	NA	NA	NA	2	79.2048	0	0.0348428	Output/R0h/cleaveLand_result/t_plot/PC-3p-117208_64_XM_021132296.1_1161_TPlot.pdf	0	79.2048	-Inf	down	5.5905e-19	3.89431e-18	yes	GO:0016070(RNA metabolic process);GO:0032501(multicellular organismal process);GO:0044424(intracellular part);GO:0048229(gametophyte development);GO:0006139(nucleobase-containing compound metabolic process);GO:0010467(gene expression);GO:0034641(cellular nitrogen compound metabolic process);GO:0008152(metabolic process);GO:0006396(RNA processing);GO:1901360(organic cyclic compound metabolic proce…	ko03008(Ribosome biogenesis in eukaryotes)
PC-3p-117208_64	XM_021137405.1	412	436	427	-39.9	-26	0.651629	16	8-14,429-423;15-24,421-412	1-7,436-430[UP5];x-x,422-422[BULt]	((((((((((.(((((((.......&.......)))))))-))))))))))	GUUGAUGGCUAGAGGGUCAAUUAGA&AUUUAACGACUCUC-GGCUAUCAAC	1	32.684	4	0.981972	Output/R8h/cleaveLand_result/t_plot/PC-3p-117208_64_XM_021137405.1_427_TPlot.pdf	0	0	NA	NA	NA	32.684	0	Inf	up	1.084e-08	1.2485e-08	yes	GO:0005840(ribosome);GO:0030529(intracellular ribonucleoprotein complex);GO:0005622(intracellular);GO:0032991(macromolecular complex);GO:0005737(cytoplasm);GO:1990904(ribonucleoprotein complex);GO:0043232(intracellular non-membrane-bounded organelle);GO:0044424(intracellular part);GO:0043229(intracellular organelle);GO:0005623(cell);GO:0044444(cytoplasmic part);GO:0043226(organelle);GO:0044464(ce…	ko03010(Ribosome)
PC-3p-117669_63	XM_016081484.2	1194	1219	1209	-38.4	-26.1	0.679688	11.5	3-5,1217-1215;6-9,1213-1210;11-14,1208-1205;15-24,1203-1194	1-2,1219-1218[UP5];x-x,1214-1214[BULt];10-10,1209-1209[SIL];x-x,1204-1204[BULt]	((((((((((.((((.((((.(((..&..)))-)))).))))-))))))))))	GGUGAGGUCGUACUUGGUGUCGGAUG&AUUUC-AUAUGAAGU-CGACUUCACC	1	32.684	4	0.806377	Output/R8h/cleaveLand_result/t_plot/PC-3p-117669_63_XM_016081484.2_1209_TPlot.pdf	0	0	NA	NA	NA	32.684	0	Inf	up	1.084e-08	1.2485e-08	yes	GO:0016747(transferase activity, transferring acyl groups other than amino-acyl groups);GO:0003824(catalytic activity);GO:0016740(transferase activity);GO:0016746(transferase activity, transferring acyl groups)	NA
PC-3p-117669_63	XM_016088865.2	313	336	327	-38.4	-29.58	0.770312	8	1-5,336-332;9-24,328-313	6-8,331-329[SIL]	((((((((((((((((...(((((&)))))...))))))))))))))))	GGUGAAGUUGGCUUCAGAAGAGAU&AUUUCAUAUGAAGUCGACUUCACC	2	65.368	2	0.139029	Output/R8h/cleaveLand_result/t_plot/PC-3p-117669_63_XM_016088865.2_327_TPlot.pdf	0	0	NA	NA	NA	65.368	0	Inf	up	6.2072e-16	2.71719e-15	yes	NA	NA
PC-3p-117669_63	XM_016089974.2	952	976	966	-38.4	-30.3	0.789062	7.5	1-7,976-970;9-15,967-961;17-24,959-952	8-8,969-968[AILt];16-16,960-960[SIL]	((((((((.(((((((..(((((((&)))))))-.))))))).))))))))	GGUGAAGUGGGCUUCAAGAUGGGAU&AUUUCAU-AUGAAGUCGACUUCACC	0	0	NA	NA	NA	1	39.6024	4	0.254918	Output/R0h/cleaveLand_result/t_plot/PC-3p-117669_63_XM_016089974.2_966_TPlot.pdf	0	39.6024	-Inf	down	3.1118e-10	6.0287e-10	yes	GO:0016020(membrane);GO:0031224(intrinsic component of membrane);GO:0044425(membrane part);GO:0016021(integral component of membrane)	NA
PC-3p-117669_63	XM_016096850.2	532	555	546	-38.4	-27.4	0.713542	9.5	3-10,553-546;13-24,543-532	1-2,555-554[UP5];11-12,545-544[SIL]	((((((((((((..((((((((..&..))))))))..))))))))))))	GGUGGGGUUGACAACAUAUGGAUU&AUUUCAUAUGAAGUCGACUUCACC	3	98.052	2	0.375957	Output/R8h/cleaveLand_result/t_plot/PC-3p-117669_63_XM_016096850.2_546_TPlot.pdf	0	0	NA	NA	NA	98.052	0	Inf	up	4.0654e-23	4.95325e-22	yes	GO:0008152(metabolic process);GO:0043414(macromolecule methylation);GO:1990259(histone-glutamine methyltransferase activity);GO:0034470(ncRNA processing);GO:0043628(ncRNA 3'-end processing);GO:0018364(peptidyl-glutamine methylation);GO:0031167(rRNA methylation);GO:0042054(histone methyltransferase activity);GO:0031974(membrane-enclosed lumen);GO:0019538(protein metabolic process);GO:0043144(snoRN…	ko03008(Ribosome biogenesis in eukaryotes)
PC-3p-117669_63	XM_021131035.1	1601	1623	1614	-38.4	-25.6	0.666667	9	4-13,1620-1611;15-24,1610-1601	1-3,1623-1621[UP5];14-14,x-x[BULq]	((((((((((-((((((((((...&...)))))))))).))))))))))	GGUGAAGUUG-UUUUAUGUGAUUC&AUUUCAUAUGAAGUCGACUUCACC	0	0	NA	NA	NA	1	39.6024	4	0.812431	Output/R0h/cleaveLand_result/t_plot/PC-3p-117669_63_XM_021131035.1_1614_TPlot.pdf	0	39.6024	-Inf	down	3.1118e-10	6.0287e-10	yes	GO:0044464(cell part);GO:0016407(acetyltransferase activity);GO:0031974(membrane-enclosed lumen);GO:0044444(cytoplasmic part);GO:0044429(mitochondrial part);GO:0009987(cellular process);GO:0005759(mitochondrial matrix);GO:0044237(cellular metabolic process);GO:0044281(small molecule metabolic process);GO:0016747(transferase activity, transferring acyl groups other than amino-acyl groups);GO:00197…	ko01110(Biosynthesis of secondary metabolites);ko00010(Glycolysis / Gluconeogenesis);ko01200(Carbon metabolism);ko01100(Metabolic pathways);ko00020(Citrate cycle (TCA cycle));ko00620(Pyruvate metabolism)
PC-3p-117903_63	XM_016089668.2	221	245	236	-31.1	-20.6	0.662379	10.5	4-10,242-236;12-23,233-222	1-3,245-243[UP5];11-11,235-234[AILt];24-24,221-221[UP3]	.((((((((((((..(((((((...&...)))))))-.)))))))))))).	UGUGUUCUGAUUAGAUUUAAUCACU&AACGAUUAAA-AUAAUUAGAACACC	1	32.684	4	0.588309	Output/R8h/cleaveLand_result/t_plot/PC-3p-117903_63_XM_016089668.2_236_TPlot.pdf	0	0	NA	NA	NA	32.684	0	Inf	up	1.084e-08	1.2485e-08	yes	NA	NA
PC-3p-118336_63	XM_016111193.2	12249	12274	12265	-43	-31.7	0.737209	9.5	4-19,12271-12256;20-24,12253-12249	1-3,12274-12272[UP5];x-x,12255-12254[BULt]	(((((..((((((((((((((((...&...))))))))))))))))--)))))	GCUCAGUGGUGCAGUUGAUUUGACAU&AAAUCAAGUCGACUGCACC--UGAGU	0	0	NA	NA	NA	5	198.012	2	0.100146	Output/R0h/cleaveLand_result/t_plot/PC-3p-118336_63_XM_016111193.2_12265_TPlot.pdf	0	198.012	-Inf	down	5.6156e-45	3.34138e-43	yes	GO:0022618(ribonucleoprotein complex assembly);GO:0005524(ATP binding);GO:0005488(binding);GO:0022607(cellular component assembly);GO:0032559(adenyl ribonucleotide binding);GO:0016887(ATPase activity);GO:0005634(nucleus);GO:0032553(ribonucleotide binding);GO:0035639(purine ribonucleoside triphosphate binding);GO:0044085(cellular component biogenesis);GO:0036094(small molecule binding);GO:0071826(…	ko03008(Ribosome biogenesis in eukaryotes)
PC-3p-118336_63	XM_016113770.2	1641	1664	1654	-43	-29.2	0.67907	5.5	1-6,1664-1659;7-18,1657-1646;20-24,1645-1641	x-x,1658-1658[BULt];19-19,x-x[BULq]	(((((-((((((((((((.((((((&))))))-)))))))))))).)))))	GCUCA-GUGCAGUUGAUUCUGAUUU&AAAUCA-AGUCGACUGCACCUGAGU	1	32.684	4	0.579072	Output/R8h/cleaveLand_result/t_plot/PC-3p-118336_63_XM_016113770.2_1654_TPlot.pdf	0	0	NA	NA	NA	32.684	0	Inf	up	1.084e-08	1.2485e-08	yes	GO:0070011(peptidase activity, acting on L-amino acid peptides);GO:0008233(peptidase activity);GO:1901564(organonitrogen compound metabolic process);GO:0044238(primary metabolic process);GO:0019538(protein metabolic process);GO:0003824(catalytic activity);GO:0006807(nitrogen compound metabolic process);GO:0016021(integral component of membrane);GO:0016787(hydrolase activity);GO:0004180(carboxypep…	NA
PC-3p-119396_62	BGI_novel_T011434	421	441	433	-37.9	-24.7	0.651715	6	2-6,440-436;8-11,435-432;14-24,431-421	1-1,441-441[UP5];7-7,x-x[BULq];12-13,x-x[BULq]	(((((((((((--((((-(((((.&.))))).))))..)))))))))))	AUUGGUUCAGU--GGUU-GGAUUC&AAAUCCGAACCAAACUGAACCAAU	0	0	NA	NA	NA	1	39.6024	4	0.961429	Output/R0h/cleaveLand_result/t_plot/PC-3p-119396_62_BGI_novel_T011434_433_TPlot.pdf	0	39.6024	-Inf	down	3.1118e-10	6.0287e-10	yes	GO:0003824(catalytic activity);GO:0016788(hydrolase activity, acting on ester bonds);GO:0016787(hydrolase activity);GO:0043167(ion binding);GO:0004722(protein serine/threonine phosphatase activity);GO:0005488(binding);GO:0004721(phosphoprotein phosphatase activity);GO:0016791(phosphatase activity);GO:0042578(phosphoric ester hydrolase activity);GO:0043169(cation binding);GO:0046872(metal ion bind…	NA
PC-3p-119396_62	XM_016077837.2	472	495	485	-37.9	-27	0.712401	7	2-8,494-488;10-18,485-477;20-24,476-472	1-1,495-495[UP5];9-9,487-486[AILt];19-19,x-x[BULq]	(((((-(((((((((..(((((((.&.)))))))-.))))))))).)))))	AUUGG-UCAGUUUGGAGUCGGGUUC&AAAUCCGA-ACCAAACUGAACCAAU	3	98.052	3	0.0918639	Output/R8h/cleaveLand_result/t_plot/PC-3p-119396_62_XM_016077837.2_485_TPlot.pdf	1	39.6024	4	0.554793	Output/R0h/cleaveLand_result/t_plot/PC-3p-119396_62_XM_016077837.2_485_TPlot.pdf	98.052	39.6024	1.30796	up	6.2938e-07	7.14036e-07	yes	GO:0036094(small molecule binding);GO:0005515(protein binding);GO:0005488(binding);GO:0006457(protein folding);GO:0032553(ribonucleotide binding);GO:0043168(anion binding);GO:0032559(adenyl ribonucleotide binding);GO:0006950(response to stress);GO:0043167(ion binding);GO:0000166(nucleotide binding);GO:0009987(cellular process);GO:0017076(purine nucleotide binding);GO:0097159(organic cyclic compou…	ko04141(Protein processing in endoplasmic reticulum);ko04626(Plant-pathogen interaction)
PC-3p-119396_62	XM_016079227.2	247	271	262	-37.9	-25	0.659631	10.5	4-6,268-266;8-16,264-256;18-23,253-248	1-3,271-269[UP5];7-7,265-265[SIL];17-17,255-254[AILt];24-24,247-247[UP3]	.((((((..(((((((((.(((...&...))).)))))))))-.)))))).	UUUGGUUGUGGUUUGGUUGGGAGAA&AAAUCCGAACCAAACU-GAACCAAU	3	98.052	2	0.6958	Output/R8h/cleaveLand_result/t_plot/PC-3p-119396_62_XM_016079227.2_262_TPlot.pdf	1	39.6024	4	0.946293	Output/R0h/cleaveLand_result/t_plot/PC-3p-119396_62_XM_016079227.2_262_TPlot.pdf	98.052	39.6024	1.30796	up	6.2938e-07	7.14036e-07	yes	GO:0005623(cell);GO:0065007(biological regulation);GO:0050789(regulation of biological process);GO:0009987(cellular process);GO:0065008(regulation of biological quality);GO:0050794(regulation of cellular process);GO:0042592(homeostatic process);GO:0019725(cellular homeostasis);GO:0045454(cell redox homeostasis)	NA
PC-3p-119396_62	XM_016080625.2	1250	1273	1264	-37.9	-28.7	0.757256	10.5	4-11,1270-1263;14-22,1260-1252	1-3,1273-1271[UP5];12-13,1262-1261[SIL];23-24,1251-1250[UP3]	..(((((((((..((((((((...&...))))))))..)))))))))..	GAUGGUUCGGUGCGGUUCGGAAAA&AAAUCCGAACCAAACUGAACCAAU	0	0	NA	NA	NA	1	39.6024	4	0.241088	Output/R0h/cleaveLand_result/t_plot/PC-3p-119396_62_XM_016080625.2_1264_TPlot.pdf	0	39.6024	-Inf	down	3.1118e-10	6.0287e-10	yes	NA	NA
PC-3p-119396_62	XM_016083813.2	2220	2243	2234	-37.9	-26.4	0.69657	9	3-7,2241-2237;9-16,2235-2228;18-21,2226-2223	1-2,2243-2242[UP5];8-8,2236-2236[SIL];17-17,2227-2227[SIL];22-24,2222-2220[UP3]	...((((.((((((((.(((((..&..))))).)))))))).))))...	CGCGGUUGAGUUUGGUGCGGAUCA&AAAUCCGAACCAAACUGAACCAAU	0	0	NA	NA	NA	2	79.2048	2	0.27539	Output/R0h/cleaveLand_result/t_plot/PC-3p-119396_62_XM_016083813.2_2234_TPlot.pdf	0	79.2048	-Inf	down	5.5905e-19	3.89431e-18	yes	GO:0003824(catalytic activity);GO:0043170(macromolecule metabolic process);GO:0008233(peptidase activity);GO:0006807(nitrogen compound metabolic process);GO:0019538(protein metabolic process);GO:0016787(hydrolase activity);GO:0008152(metabolic process);GO:0004252(serine-type endopeptidase activity);GO:0071704(organic substance metabolic process);GO:0004175(endopeptidase activity);GO:0070011(pepti…	ko00520(Amino sugar and nucleotide sugar metabolism);ko01100(Metabolic pathways);ko04146(Peroxisome)
PC-3p-119396_62	XM_016110937.2	1096	1120	1111	-37.9	-25.1	0.662269	10.5	3-12,1118-1109;13-17,1107-1103;19-21,1101-1099	1-2,1120-1119[UP5];x-x,1108-1108[BULt];18-18,1102-1102[SIL];22-24,1098-1096[UP3]	...(((.(((((.((((((((((..&..))))))))))-))))).)))...	AUAGGUCCGGUUCUGGUUCGGGUCG&AAAUCCGAACCA-AACUGAACCAAU	4	130.736	2	0.654523	Output/R8h/cleaveLand_result/t_plot/PC-3p-119396_62_XM_016110937.2_1111_TPlot.pdf	0	0	NA	NA	NA	130.736	0	Inf	up	2.8161e-30	6.66857e-29	yes	GO:0005488(binding);GO:0046872(metal ion binding);GO:0043167(ion binding);GO:0043169(cation binding)	NA
PC-3p-119396_62	XM_016112868.2	2671	2694	2685	-37.9	-25.9	0.683377	8.5	1-12,2694-2683;15-16,2680-2679;18-21,2677-2674	13-14,2682-2681[SIL];17-17,2678-2678[SIL];22-24,2673-2671[UP3]	...((((.((..((((((((((((&))))))))))))..)).))))...	AGGGGUUGGGGAUGGUUUGGGUUU&AAAUCCGAACCAAACUGAACCAAU	1	32.684	4	0.88881	Output/R8h/cleaveLand_result/t_plot/PC-3p-119396_62_XM_016112868.2_2685_TPlot.pdf	0	0	NA	NA	NA	32.684	0	Inf	up	1.084e-08	1.2485e-08	yes	GO:0044237(cellular metabolic process);GO:0005623(cell);GO:0019219(regulation of nucleobase-containing compound metabolic process);GO:0043226(organelle);GO:0009719(response to endogenous stimulus);GO:0010556(regulation of macromolecule biosynthetic process);GO:0005634(nucleus);GO:0090304(nucleic acid metabolic process);GO:0043231(intracellular membrane-bounded organelle);GO:0050896(response to st…	ko04075(Plant hormone signal transduction)
PC-3p-119396_62	XM_021126165.1	2666	2689	2680	-37.9	-25.9	0.683377	8.5	1-12,2689-2678;15-16,2675-2674;18-21,2672-2669	13-14,2677-2676[SIL];17-17,2673-2673[SIL];22-24,2668-2666[UP3]	...((((.((..((((((((((((&))))))))))))..)).))))...	AGGGGUUGGGGAUGGUUUGGGUUU&AAAUCCGAACCAAACUGAACCAAU	1	32.684	4	0.878491	Output/R8h/cleaveLand_result/t_plot/PC-3p-119396_62_XM_021126165.1_2680_TPlot.pdf	0	0	NA	NA	NA	32.684	0	Inf	up	1.084e-08	1.2485e-08	yes	GO:0044237(cellular metabolic process);GO:0005623(cell);GO:0019219(regulation of nucleobase-containing compound metabolic process);GO:0043226(organelle);GO:0009719(response to endogenous stimulus);GO:0010556(regulation of macromolecule biosynthetic process);GO:0005634(nucleus);GO:0090304(nucleic acid metabolic process);GO:0043231(intracellular membrane-bounded organelle);GO:0050896(response to st…	ko04075(Plant hormone signal transduction)
PC-3p-119396_62	XM_021126166.1	2619	2642	2633	-37.9	-25.9	0.683377	8.5	1-12,2642-2631;15-16,2628-2627;18-21,2625-2622	13-14,2630-2629[SIL];17-17,2626-2626[SIL];22-24,2621-2619[UP3]	...((((.((..((((((((((((&))))))))))))..)).))))...	AGGGGUUGGGGAUGGUUUGGGUUU&AAAUCCGAACCAAACUGAACCAAU	1	32.684	4	0.89125	Output/R8h/cleaveLand_result/t_plot/PC-3p-119396_62_XM_021126166.1_2633_TPlot.pdf	0	0	NA	NA	NA	32.684	0	Inf	up	1.084e-08	1.2485e-08	yes	GO:0044237(cellular metabolic process);GO:0005623(cell);GO:0019219(regulation of nucleobase-containing compound metabolic process);GO:0043226(organelle);GO:0009719(response to endogenous stimulus);GO:0010556(regulation of macromolecule biosynthetic process);GO:0005634(nucleus);GO:0090304(nucleic acid metabolic process);GO:0043231(intracellular membrane-bounded organelle);GO:0050896(response to st…	ko04075(Plant hormone signal transduction)
PC-3p-119826_61	XM_016080561.2	1018	1040	1032	-43.2	-28.52	0.660185	12	1-3,1040-1038;8-11,1034-1031;14-24,1028-1018	4-7,1037-1035[AILq];12-13,1030-1029[SIL]	(((((((((((..((((...-(((&)))....))))..)))))))))))	CUCAGGUGCAGCAGAGUCCG-GUG&CACGUAAAUUCGACUGCACCUGAG	0	0	NA	NA	NA	1	39.6024	4	0.708355	Output/R0h/cleaveLand_result/t_plot/PC-3p-119826_61_XM_016080561.2_1032_TPlot.pdf	0	39.6024	-Inf	down	3.1118e-10	6.0287e-10	yes	GO:0043170(macromolecule metabolic process);GO:0010033(response to organic substance);GO:0071367(cellular response to brassinosteroid stimulus);GO:0009741(response to brassinosteroid);GO:0016311(dephosphorylation);GO:0071407(cellular response to organic cyclic compound);GO:1901564(organonitrogen compound metabolic process);GO:0006807(nitrogen compound metabolic process);GO:0043412(macromolecule m…	NA
PC-3p-120365_61	BGI_novel_T005394	1030	1052	1043	-34.5	-22.7	0.657971	11.5	5-10,1048-1043;12-22,1042-1032	1-4,1052-1049[UP5];11-11,x-x[BULq];23-24,1031-1030[UP3]	..(((((((((((-((((((....&....)))))).)))))))))))..	AUUGUGUUGAUUC-CAGUUCUUCC&AAAUGAACUGAGAAUUAACACACA	1	32.684	4	0.550101	Output/R8h/cleaveLand_result/t_plot/PC-3p-120365_61_BGI_novel_T005394_1043_TPlot.pdf	0	0	NA	NA	NA	32.684	0	Inf	up	1.084e-08	1.2485e-08	yes	GO:0044267(cellular protein metabolic process);GO:1901564(organonitrogen compound metabolic process);GO:2000112(regulation of cellular macromolecule biosynthetic process);GO:0019538(protein metabolic process);GO:0050896(response to stimulus);GO:0043412(macromolecule modification);GO:0035556(intracellular signal transduction);GO:0016310(phosphorylation);GO:0044444(cytoplasmic part);GO:0003824(cata…	ko04075(Plant hormone signal transduction);ko04016(MAPK signaling pathway - plant)
PC-3p-120365_61	XM_016105009.2	1028	1050	1041	-34.5	-22.7	0.657971	11.5	5-10,1046-1041;12-22,1040-1030	1-4,1050-1047[UP5];11-11,x-x[BULq];23-24,1029-1028[UP3]	..(((((((((((-((((((....&....)))))).)))))))))))..	AUUGUGUUGAUUC-CAGUUCUUCC&AAAUGAACUGAGAAUUAACACACA	1	32.684	4	0.540008	Output/R8h/cleaveLand_result/t_plot/PC-3p-120365_61_XM_016105009.2_1041_TPlot.pdf	0	0	NA	NA	NA	32.684	0	Inf	up	1.084e-08	1.2485e-08	yes	GO:0044267(cellular protein metabolic process);GO:1901564(organonitrogen compound metabolic process);GO:2000112(regulation of cellular macromolecule biosynthetic process);GO:0019538(protein metabolic process);GO:0050896(response to stimulus);GO:0043412(macromolecule modification);GO:0035556(intracellular signal transduction);GO:0016310(phosphorylation);GO:0044444(cytoplasmic part);GO:0003824(cata…	ko04075(Plant hormone signal transduction);ko04016(MAPK signaling pathway - plant)
PC-3p-121413_60	BGI_novel_T001064	596	615	606	-32.3	-24.8	0.767802	3.5	1-19,615-597	20-20,596-596[UP3]	.(((((((((((((((((((&))))))))))))))))))).	CAGUUUUCUUUGUGUGAAAA&UUUUCACACGGAGAAGACUA	0	0	NA	NA	NA	1	39.6024	4	0.167992	Output/R0h/cleaveLand_result/t_plot/PC-3p-121413_60_BGI_novel_T001064_606_TPlot.pdf	0	39.6024	-Inf	down	3.1118e-10	6.0287e-10	yes	GO:0006950(response to stress);GO:0009607(response to biotic stimulus);GO:0006952(defense response);GO:0050896(response to stimulus)	NA
PC-3p-121413_60	BGI_novel_T001065	596	615	606	-32.3	-24.8	0.767802	3.5	1-19,615-597	20-20,596-596[UP3]	.(((((((((((((((((((&))))))))))))))))))).	CAGUUUUCUUUGUGUGAAAA&UUUUCACACGGAGAAGACUA	0	0	NA	NA	NA	1	39.6024	4	0.268496	Output/R0h/cleaveLand_result/t_plot/PC-3p-121413_60_BGI_novel_T001065_606_TPlot.pdf	0	39.6024	-Inf	down	3.1118e-10	6.0287e-10	yes	GO:0050896(response to stimulus);GO:0009607(response to biotic stimulus);GO:0006952(defense response);GO:0006950(response to stress)	NA
PC-3p-121413_60	BGI_novel_T001066	603	622	613	-32.3	-24.8	0.767802	3.5	1-19,622-604	20-20,603-603[UP3]	.(((((((((((((((((((&))))))))))))))))))).	CAGUUUUCUUUGUGUGAAAA&UUUUCACACGGAGAAGACUA	0	0	NA	NA	NA	1	39.6024	4	0.152548	Output/R0h/cleaveLand_result/t_plot/PC-3p-121413_60_BGI_novel_T001066_613_TPlot.pdf	0	39.6024	-Inf	down	3.1118e-10	6.0287e-10	yes	GO:0050896(response to stimulus);GO:0009607(response to biotic stimulus);GO:0006952(defense response);GO:0006950(response to stress)	NA
PC-3p-121413_60	BGI_novel_T002717	573	592	583	-32.3	-22.1	0.684211	5.5	1-11,592-582;13-14,580-579;16-20,577-573	12-12,581-581[SIL];15-15,578-578[SIL]	(((((.((.(((((((((((&))))))))))).)).)))))	UGGUCAUCGCUGUGUGGAAA&UUUUCACACGGAGAAGACUA	1	32.684	4	0.993785	Output/R8h/cleaveLand_result/t_plot/PC-3p-121413_60_BGI_novel_T002717_583_TPlot.pdf	0	0	NA	NA	NA	32.684	0	Inf	up	1.084e-08	1.2485e-08	yes	GO:0071704(organic substance metabolic process);GO:0000166(nucleotide binding);GO:0097159(organic cyclic compound binding);GO:0005622(intracellular);GO:0043231(intracellular membrane-bounded organelle);GO:0090304(nucleic acid metabolic process);GO:0030554(adenyl nucleotide binding);GO:0046483(heterocycle metabolic process);GO:0005524(ATP binding);GO:0006260(DNA replication);GO:0017076(purine nucl…	ko03410(Base excision repair);ko03420(Nucleotide excision repair);ko03030(DNA replication);ko03430(Mismatch repair)
PC-3p-121413_60	BGI_novel_T003807	673	693	684	-32.3	-21.3	0.659443	5.5	1-7,693-687;9-16,685-678;17-20,676-673	8-8,686-686[SIL];x-x,677-677[BULt]	((((.((((((((.(((((((&))))))).))))))))-))))	UAGUACUUCUUCGAGUGAGAG&UUUUCACACGGAGAAG-ACUA	0	0	NA	NA	NA	1	39.6024	4	0.999646	Output/R0h/cleaveLand_result/t_plot/PC-3p-121413_60_BGI_novel_T003807_684_TPlot.pdf	0	39.6024	-Inf	down	3.1118e-10	6.0287e-10	yes	GO:0016818(hydrolase activity, acting on acid anhydrides, in phosphorus-containing anhydrides);GO:0043170(macromolecule metabolic process);GO:1901363(heterocyclic compound binding);GO:0044464(cell part);GO:0004386(helicase activity);GO:1901360(organic cyclic compound metabolic process);GO:0006807(nitrogen compound metabolic process);GO:0005622(intracellular);GO:0032555(purine ribonucleotide bindi…	NA
PC-3p-121413_60	BGI_novel_T003808	673	693	684	-32.3	-21.3	0.659443	5.5	1-7,693-687;9-16,685-678;17-20,676-673	8-8,686-686[SIL];x-x,677-677[BULt]	((((.((((((((.(((((((&))))))).))))))))-))))	UAGUACUUCUUCGAGUGAGAG&UUUUCACACGGAGAAG-ACUA	0	0	NA	NA	NA	1	39.6024	4	0.999439	Output/R0h/cleaveLand_result/t_plot/PC-3p-121413_60_BGI_novel_T003808_684_TPlot.pdf	0	39.6024	-Inf	down	3.1118e-10	6.0287e-10	yes	GO:0016818(hydrolase activity, acting on acid anhydrides, in phosphorus-containing anhydrides);GO:0043170(macromolecule metabolic process);GO:1901363(heterocyclic compound binding);GO:0044464(cell part);GO:0004386(helicase activity);GO:1901360(organic cyclic compound metabolic process);GO:0006807(nitrogen compound metabolic process);GO:0005622(intracellular);GO:0032555(purine ribonucleotide bindi…	NA
PC-3p-121413_60	BGI_novel_T007919	550	571	562	-32.3	-21.5	0.665635	7.5	2-12,570-560;15-17,556-554;18-20,552-550	1-1,571-571[UP5];13-14,559-557[AILt];x-x,553-553[BULt]	(((.(((...(((((((((((.&.)))))))))))-..)))-)))	UGGAUCUGGAUCCGUGUGAGAU&UUUUCACACGGA-GAAGA-CUA	1	32.684	4	0.999787	Output/R8h/cleaveLand_result/t_plot/PC-3p-121413_60_BGI_novel_T007919_562_TPlot.pdf	0	0	NA	NA	NA	32.684	0	Inf	up	1.084e-08	1.2485e-08	yes	GO:0045454(cell redox homeostasis);GO:0050794(regulation of cellular process);GO:0019725(cellular homeostasis);GO:0050789(regulation of biological process);GO:0005623(cell);GO:0042592(homeostatic process);GO:0065007(biological regulation);GO:0009987(cellular process);GO:0065008(regulation of biological quality)	NA
PC-3p-121413_60	BGI_novel_T009415	1145	1167	1158	-32.3	-23.6	0.73065	10	4-14,1164-1154;15-18,1150-1147	1-3,1167-1165[UP5];x-x,1153-1151[BULt];19-20,1146-1145[UP3]	..((((...(((((((((((...&...)))))))))))---))))..	UCGUCUCAGUCUCCGUGUGACCU&UUUUCACACGGAGA---AGACUA	1	32.684	4	0.758279	Output/R8h/cleaveLand_result/t_plot/PC-3p-121413_60_BGI_novel_T009415_1158_TPlot.pdf	0	0	NA	NA	NA	32.684	0	Inf	up	1.084e-08	1.2485e-08	yes	GO:0005975(carbohydrate metabolic process);GO:0004649(poly(ADP-ribose) glycohydrolase activity);GO:0071704(organic substance metabolic process);GO:0003824(catalytic activity);GO:0008152(metabolic process);GO:0004553(hydrolase activity, hydrolyzing O-glycosyl compounds);GO:0044238(primary metabolic process);GO:0016798(hydrolase activity, acting on glycosyl bonds);GO:0016787(hydrolase activity)	NA
PC-3p-121413_60	XM_016076477.2	184	204	195	-32.3	-21.9	0.678019	8	2-12,203-193;13-15,191-189;17-18,187-186	1-1,204-204[UP5];x-x,192-192[BULt];16-16,188-188[SIL];19-20,185-184[UP3]	..((.(((.(((((((((((.&.)))))))))))-))).))..	UUGUGUUCUUCCGUGUGGAGC&UUUUCACACGGA-GAAGACUA	2	65.368	3	0.420341	Output/R8h/cleaveLand_result/t_plot/PC-3p-121413_60_XM_016076477.2_195_TPlot.pdf	0	0	NA	NA	NA	65.368	0	Inf	up	6.2072e-16	2.71719e-15	yes	NA	NA
PC-3p-121413_60	XM_016078294.1	105	124	116	-32.3	-21	0.650155	8	3-7,122-118;9-15,117-111;16-18,109-107	1-2,124-123[UP5];8-8,x-x[BULq];x-x,110-110[BULt];19-20,106-105[UP3]	..(((.(((((((-(((((..&..))))).)))))))-)))..	CCGUCUUUCUCCG-GUGAACC&UUUUCACACGGAGAA-GACUA	1	32.684	4	0.999981	Output/R8h/cleaveLand_result/t_plot/PC-3p-121413_60_XM_016078294.1_116_TPlot.pdf	0	0	NA	NA	NA	32.684	0	Inf	up	1.084e-08	1.2485e-08	yes	NA	ko00970(Aminoacyl-tRNA biosynthesis)
PC-3p-121413_60	XM_016080261.2	1867	1886	1877	-32.3	-22.9	0.708978	10	5-13,1882-1874;16-19,1871-1868	1-4,1886-1883[UP5];14-15,1873-1872[SIL];20-20,1867-1867[UP3]	.((((..(((((((((....&....)))))))))..)))).	CAGUCGGCUCCGUGUGUCCU&UUUUCACACGGAGAAGACUA	1	32.684	4	0.908937	Output/R8h/cleaveLand_result/t_plot/PC-3p-121413_60_XM_016080261.2_1877_TPlot.pdf	1	39.6024	4	0.862792	Output/R0h/cleaveLand_result/t_plot/PC-3p-121413_60_XM_016080261.2_1877_TPlot.pdf	32.684	39.6024	-0.277003	down	0.4158	0.417305	yes	GO:0009987(cellular process);GO:0005623(cell);GO:1901265(nucleoside phosphate binding);GO:0016020(membrane);GO:0071944(cell periphery);GO:0016818(hydrolase activity, acting on acid anhydrides, in phosphorus-containing anhydrides);GO:0008568(microtubule-severing ATPase activity);GO:1901363(heterocyclic compound binding);GO:0016887(ATPase activity);GO:0032555(purine ribonucleotide binding);GO:00325…	ko04141(Protein processing in endoplasmic reticulum)
PC-3p-121413_60	XM_016080540.2	642	661	652	-32.3	-24.2	0.749226	5.5	2-8,660-654;10-20,652-642	1-1,661-661[UP5];9-9,653-653[SIL]	(((((((((((.(((((((.&.))))))).)))))))))))	UGGUCUUCUCUUUGUGGAAC&UUUUCACACGGAGAAGACUA	2	65.368	2	0.212987	Output/R8h/cleaveLand_result/t_plot/PC-3p-121413_60_XM_016080540.2_652_TPlot.pdf	0	0	NA	NA	NA	65.368	0	Inf	up	6.2072e-16	2.71719e-15	yes	GO:0016747(transferase activity, transferring acyl groups other than amino-acyl groups);GO:0016746(transferase activity, transferring acyl groups);GO:0003824(catalytic activity);GO:0016740(transferase activity)	ko00943(Isoflavonoid biosynthesis);ko00944(Flavone and flavonol biosynthesis);ko00330(Arginine and proline metabolism)
PC-3p-121413_60	XM_016081466.2	1219	1238	1229	-32.3	-22.3	0.690402	5	2-10,1237-1229;12-20,1227-1219	1-1,1238-1238[UP5];11-11,1228-1228[SIL]	(((((((((.(((((((((.&.))))))))).)))))))))	UGGUUUUCUACGUGUGGAAC&UUUUCACACGGAGAAGACUA	7	228.788	2	0.76059	Output/R8h/cleaveLand_result/t_plot/PC-3p-121413_60_XM_016081466.2_1229_TPlot.pdf	0	0	NA	NA	NA	228.788	0	Inf	up	1.0813e-51	7.40306e-50	yes	GO:0004659(prenyltransferase activity);GO:0043227(membrane-bounded organelle);GO:0009507(chloroplast);GO:0005737(cytoplasm);GO:0043229(intracellular organelle);GO:0003824(catalytic activity);GO:0005623(cell);GO:0044424(intracellular part);GO:0044444(cytoplasmic part);GO:0016765(transferase activity, transferring alkyl or aryl (other than methyl) groups);GO:0009536(plastid);GO:0005622(intracellula…	ko01110(Biosynthesis of secondary metabolites);ko00130(Ubiquinone and other terpenoid-quinone biosynthesis);ko01100(Metabolic pathways)
PC-3p-121413_60	XM_016086460.1	1149	1170	1159	-32.3	-22	0.681115	8	2-6,1169-1165;7-8,1163-1162;9-19,1160-1150	1-1,1170-1170[UP5];x-x,1164-1164[BULt];x-x,1161-1161[BULt];20-20,1149-1149[UP3]	.(((((((((((.((.(((((.&.)))))-))-))))))))))).	GGGUUUUCUCCGAUGAUGAGAG&UUUUCA-CA-CGGAGAAGACUA	7	228.788	2	0.841379	Output/R8h/cleaveLand_result/t_plot/PC-3p-121413_60_XM_016086460.1_1159_TPlot.pdf	3	118.807	2	0.744936	Output/R0h/cleaveLand_result/t_plot/PC-3p-121413_60_XM_016086460.1_1159_TPlot.pdf	228.788	118.807	0.94539	up	3.6452e-09	7.03377e-09	yes	NA	NA
PC-3p-121413_60	XM_016093315.2	663	681	673	-32.3	-22.2	0.687307	6.5	2-5,680-677;7-11,676-672;13-19,670-664	1-1,681-681[UP5];6-6,x-x[BULq];12-12,671-671[SIL];20-20,663-663[UP3]	.(((((((.(((((-((((.&.)))).))))).))))))).	AGGUCUUCCCCGUG-GAAAU&UUUUCACACGGAGAAGACUA	1	32.684	4	0.987637	Output/R8h/cleaveLand_result/t_plot/PC-3p-121413_60_XM_016093315.2_673_TPlot.pdf	0	0	NA	NA	NA	32.684	0	Inf	up	1.084e-08	1.2485e-08	yes	GO:0016020(membrane);GO:0031224(intrinsic component of membrane);GO:0044425(membrane part);GO:0016021(integral component of membrane)	NA
PC-3p-121413_60	XM_016095001.2	653	672	663	-32.3	-21.7	0.671827	12	6-18,667-655	1-5,672-668[UP5];19-20,654-653[UP3]	..(((((((((((((.....&.....)))))))))))))..	CUGUCUUCUCUGUGUUCCUC&UUUUCACACGGAGAAGACUA	0	0	NA	NA	NA	1	39.6024	4	0.996952	Output/R0h/cleaveLand_result/t_plot/PC-3p-121413_60_XM_016095001.2_663_TPlot.pdf	0	39.6024	-Inf	down	3.1118e-10	6.0287e-10	yes	GO:0016020(membrane);GO:0031224(intrinsic component of membrane);GO:0016021(integral component of membrane);GO:0044425(membrane part)	NA
PC-3p-121413_60	XM_016096963.2	1334	1352	1344	-32.3	-21.5	0.665635	8	2-5,1351-1348;7-17,1347-1337	1-1,1352-1352[UP5];6-6,x-x[BULq];18-20,1336-1334[UP3]	...(((((((((((-((((.&.)))).)))))))))))...	UUCUCUUCUCCGUG-GGAGC&UUUUCACACGGAGAAGACUA	0	0	NA	NA	NA	1	39.6024	4	0.998951	Output/R0h/cleaveLand_result/t_plot/PC-3p-121413_60_XM_016096963.2_1344_TPlot.pdf	0	39.6024	-Inf	down	3.1118e-10	6.0287e-10	yes	GO:0016020(membrane);GO:0015075(ion transmembrane transporter activity);GO:0005623(cell);GO:0031224(intrinsic component of membrane);GO:0055085(transmembrane transport);GO:0016021(integral component of membrane);GO:0015112(nitrate transmembrane transporter activity);GO:0006811(ion transport);GO:0005886(plasma membrane);GO:0015706(nitrate transport);GO:0008509(anion transmembrane transporter activ…	ko00910(Nitrogen metabolism)
PC-3p-121413_60	XM_016097602.2	799	819	809	-32.3	-21.6	0.668731	9	2-6,818-814;7-9,812-810;11-18,808-801	1-1,819-819[UP5];x-x,813-813[BULt];10-10,809-809[SIL];19-20,800-799[UP3]	..((((((((.(((.(((((.&.)))))-))).))))))))..	GCGUCUUCUCGGUGCUGAGGU&UUUUCA-CACGGAGAAGACUA	2	65.368	2	0.923826	Output/R8h/cleaveLand_result/t_plot/PC-3p-121413_60_XM_016097602.2_809_TPlot.pdf	2	79.2048	2	0.851996	Output/R0h/cleaveLand_result/t_plot/PC-3p-121413_60_XM_016097602.2_809_TPlot.pdf	65.368	79.2048	-0.277003	down	0.24981	0.262584	yes	GO:0044283(small molecule biosynthetic process);GO:0009308(amine metabolic process);GO:0046219(indolalkylamine biosynthetic process);GO:0046483(heterocycle metabolic process);GO:0016835(carbon-oxygen lyase activity);GO:0006568(tryptophan metabolic process);GO:0006725(cellular aromatic compound metabolic process);GO:0071704(organic substance metabolic process);GO:0046394(carboxylic acid biosynthet…	ko01100(Metabolic pathways);ko00260(Glycine, serine and threonine metabolism);ko01230(Biosynthesis of amino acids);ko01110(Biosynthesis of secondary metabolites);ko00400(Phenylalanine, tyrosine and tryptophan biosynthesis)
PC-3p-121413_60	XM_016101719.2	2431	2450	2441	-32.3	-24.5	0.758514	4.5	1-8,2450-2443;10-20,2441-2431	9-9,2442-2442[SIL]	(((((((((((.((((((((&)))))))).)))))))))))	UGGUUUUCUCCUUGUGAGAG&UUUUCACACGGAGAAGACUA	3	98.052	2	0.189069	Output/R8h/cleaveLand_result/t_plot/PC-3p-121413_60_XM_016101719.2_2441_TPlot.pdf	1	39.6024	4	0.402473	Output/R0h/cleaveLand_result/t_plot/PC-3p-121413_60_XM_016101719.2_2441_TPlot.pdf	98.052	39.6024	1.30796	up	6.2938e-07	7.14036e-07	yes	GO:0003825(alpha,alpha-trehalose-phosphate synthase (UDP-forming) activity);GO:0016791(phosphatase activity);GO:0005984(disaccharide metabolic process);GO:0005975(carbohydrate metabolic process);GO:0034637(cellular carbohydrate biosynthetic process);GO:0016051(carbohydrate biosynthetic process);GO:0006796(phosphate-containing compound metabolic process);GO:0004805(trehalose-phosphatase activity);…	ko01100(Metabolic pathways);ko00500(Starch and sucrose metabolism)
PC-3p-121413_60	XM_016105533.2	417	441	427	-32.3	-22.1	0.684211	17	4-7,438-435;8-18,429-419	1-3,441-439[UP5];x-x,434-430[BULt];19-20,418-417[UP3]	..(((((((((((.....((((...&...))))-----)))))))))))..	ACGUCUUCUCCGUCCCCGGUGACUU&UUUUCAC-----ACGGAGAAGACUA	2	65.368	3	0.403601	Output/R8h/cleaveLand_result/t_plot/PC-3p-121413_60_XM_016105533.2_427_TPlot.pdf	0	0	NA	NA	NA	65.368	0	Inf	up	6.2072e-16	2.71719e-15	yes	GO:0043167(ion binding);GO:0097159(organic cyclic compound binding);GO:1901681(sulfur compound binding);GO:0046872(metal ion binding);GO:0016831(carboxy-lyase activity);GO:0016830(carbon-carbon lyase activity);GO:0043168(anion binding);GO:0000287(magnesium ion binding);GO:0019842(vitamin binding);GO:0050662(coenzyme binding);GO:0003824(catalytic activity);GO:0043169(cation binding);GO:0036094(sma…	ko01110(Biosynthesis of secondary metabolites);ko00010(Glycolysis / Gluconeogenesis);ko01100(Metabolic pathways)
PC-3p-121413_60	XM_016108783.2	11107	11125	11116	-32.3	-22.2	0.687307	7.5	4-16,11122-11110;18-19,11109-11108	1-3,11125-11123[UP5];17-17,x-x[BULq];20-20,11107-11107[UP3]	.((-(((((((((((((...&...))))))))))))).)).	CAG-CUUUUCCGUGUGAUGA&UUUUCACACGGAGAAGACUA	1	32.684	4	0.988173	Output/R8h/cleaveLand_result/t_plot/PC-3p-121413_60_XM_016108783.2_11116_TPlot.pdf	0	0	NA	NA	NA	32.684	0	Inf	up	1.084e-08	1.2485e-08	yes	GO:0006725(cellular aromatic compound metabolic process);GO:0046483(heterocycle metabolic process);GO:1990234(transferase complex);GO:0018205(peptidyl-lysine modification);GO:0006281(DNA repair);GO:0044424(intracellular part);GO:0016570(histone modification);GO:0071840(cellular component organization or biogenesis);GO:0006793(phosphorus metabolic process);GO:0016772(transferase activity, transfer…	NA
PC-3p-121413_60	XM_016117363.2	2811	2829	2821	-32.3	-21.8	0.674923	6.5	1-7,2829-2823;9-18,2822-2813	8-8,x-x[BULq];19-20,2812-2811[UP3]	..((((((((((-(((((((&))))))).))))))))))..	CUGUCUUUUCUG-GUGAGAA&UUUUCACACGGAGAAGACUA	0	0	NA	NA	NA	1	39.6024	4	0.995833	Output/R0h/cleaveLand_result/t_plot/PC-3p-121413_60_XM_016117363.2_2821_TPlot.pdf	0	39.6024	-Inf	down	3.1118e-10	6.0287e-10	yes	NA	ko04144(Endocytosis)
PC-3p-121413_60	XM_021140877.1	1411	1430	1421	-32.3	-23.7	0.733746	6	2-17,1429-1414	1-1,1430-1430[UP5];18-20,1413-1411[UP3]	...((((((((((((((((.&.))))))))))))))))...	UGAUCUUCUUCGUGUGAAGU&UUUUCACACGGAGAAGACUA	0	0	NA	NA	NA	1	39.6024	4	0.655856	Output/R0h/cleaveLand_result/t_plot/PC-3p-121413_60_XM_021140877.1_1421_TPlot.pdf	0	39.6024	-Inf	down	3.1118e-10	6.0287e-10	yes	GO:0008276(protein methyltransferase activity);GO:0016278(lysine N-methyltransferase activity);GO:0018026(peptidyl-lysine monomethylation);GO:0009987(cellular process);GO:1901564(organonitrogen compound metabolic process);GO:0006464(cellular protein modification process);GO:0044238(primary metabolic process);GO:0036211(protein modification process);GO:0043170(macromolecule metabolic process);GO:0…	ko00310(Lysine degradation)
PC-3p-122748_59	BGI_novel_T007568	816	840	831	-43.4	-28.7	0.66129	8.5	2-11,839-830;12-16,828-824;19-23,821-817	1-1,840-840[UP5];x-x,829-829[BULt];17-18,823-822[SIL];24-24,816-816[UP3]	.(((((..(((((.((((((((((.&.))))))))))-)))))..))))).	UGGGAUGAAGGUGAUAGUGGACUUG&AAAGUCCACUG-CACCUGAGUUUCU	1	32.684	4	0.983865	Output/R8h/cleaveLand_result/t_plot/PC-3p-122748_59_BGI_novel_T007568_831_TPlot.pdf	0	0	NA	NA	NA	32.684	0	Inf	up	1.084e-08	1.2485e-08	yes	GO:0044877(macromolecular complex binding);GO:0004338(glucan exo-1,3-beta-glucosidase activity);GO:0007010(cytoskeleton organization);GO:0030029(actin filament-based process);GO:0005488(binding);GO:0006996(organelle organization);GO:0030036(actin cytoskeleton organization);GO:0032403(protein complex binding);GO:0008152(metabolic process);GO:0016798(hydrolase activity, acting on glycosyl bonds);GO…	ko04626(Plant-pathogen interaction);ko00500(Starch and sucrose metabolism);ko04016(MAPK signaling pathway - plant)
PC-3p-122748_59	BGI_novel_T007569	2610	2634	2625	-43.4	-28.7	0.66129	8.5	2-11,2633-2624;12-16,2622-2618;19-23,2615-2611	1-1,2634-2634[UP5];x-x,2623-2623[BULt];17-18,2617-2616[SIL];24-24,2610-2610[UP3]	.(((((..(((((.((((((((((.&.))))))))))-)))))..))))).	UGGGAUGAAGGUGAUAGUGGACUUG&AAAGUCCACUG-CACCUGAGUUUCU	2	65.368	2	0.753314	Output/R8h/cleaveLand_result/t_plot/PC-3p-122748_59_BGI_novel_T007569_2625_TPlot.pdf	0	0	NA	NA	NA	65.368	0	Inf	up	6.2072e-16	2.71719e-15	yes	GO:0044877(macromolecular complex binding);GO:0004338(glucan exo-1,3-beta-glucosidase activity);GO:0007010(cytoskeleton organization);GO:0030029(actin filament-based process);GO:0005488(binding);GO:0006996(organelle organization);GO:0030036(actin cytoskeleton organization);GO:0032403(protein complex binding);GO:0008152(metabolic process);GO:0016798(hydrolase activity, acting on glycosyl bonds);GO…	ko04626(Plant-pathogen interaction);ko00500(Starch and sucrose metabolism);ko04016(MAPK signaling pathway - plant)
PC-3p-122748_59	XM_016076239.2	1529	1554	1545	-43.4	-28.5	0.656682	8	3-12,1552-1543;15-18,1540-1537;19-22,1535-1532;23-24,1530-1529	1-2,1554-1553[UP5];13-14,1542-1541[SIL];x-x,1536-1536[BULt];x-x,1531-1531[BULt]	((.((((.((((..((((((((((..&..))))))))))..))))-))))-))	AGAAAACAUCAGAGGCAGUGGGCUAU&AAAGUCCACUGCACCUGA-GUUU-CU	1	32.684	4	0.989875	Output/R8h/cleaveLand_result/t_plot/PC-3p-122748_59_XM_016076239.2_1545_TPlot.pdf	0	0	NA	NA	NA	32.684	0	Inf	up	1.084e-08	1.2485e-08	yes	GO:1901360(organic cyclic compound metabolic process);GO:0006520(cellular amino acid metabolic process);GO:0044238(primary metabolic process);GO:0046483(heterocycle metabolic process);GO:0043170(macromolecule metabolic process);GO:0034641(cellular nitrogen compound metabolic process);GO:0043043(peptide biosynthetic process);GO:0032559(adenyl ribonucleotide binding);GO:0035639(purine ribonucleosid…	ko00970(Aminoacyl-tRNA biosynthesis)
PC-3p-122748_59	XM_016085420.2	287	311	302	-43.4	-28.42	0.654839	10	3-11,309-301;15-24,296-287	1-2,311-310[UP5];12-14,300-297[AILt]	((((((((((....(((((((((..&..)))))))))-...))))))))))	GGGAACUCAGUACUCAGUGGACUCU&AAAGUCCACUG-CACCUGAGUUUCU	0	0	NA	NA	NA	2	79.2048	3	0.25528	Output/R0h/cleaveLand_result/t_plot/PC-3p-122748_59_XM_016085420.2_302_TPlot.pdf	0	79.2048	-Inf	down	5.5905e-19	3.89431e-18	yes	GO:0016791(phosphatase activity);GO:0006793(phosphorus metabolic process);GO:0042578(phosphoric ester hydrolase activity);GO:0009987(cellular process);GO:0006796(phosphate-containing compound metabolic process);GO:0016311(dephosphorylation);GO:0003993(acid phosphatase activity);GO:0016787(hydrolase activity);GO:0008152(metabolic process);GO:0016788(hydrolase activity, acting on ester bonds);GO:00…	ko03010(Ribosome);ko04016(MAPK signaling pathway - plant)
PC-3p-122748_59	XM_016090370.2	476	498	489	-43.4	-31.32	0.721659	5.5	2-15,497-484;20-24,480-476	1-1,498-498[UP5];16-19,483-481[AILq]	(((((...-((((((((((((((.&.))))))))))))))....)))))	AGAGAAAU-GGUGCAGUGGACUUA&AAAGUCCACUGCACCUGAGUUUCU	2	65.368	2	0.291281	Output/R8h/cleaveLand_result/t_plot/PC-3p-122748_59_XM_016090370.2_489_TPlot.pdf	0	0	NA	NA	NA	65.368	0	Inf	up	6.2072e-16	2.71719e-15	yes	GO:1905368(peptidase complex);GO:0005623(cell);GO:0000502(proteasome complex);GO:0005622(intracellular);GO:0044464(cell part);GO:0043234(protein complex);GO:1902494(catalytic complex);GO:1905369(endopeptidase complex);GO:0044424(intracellular part);GO:0032991(macromolecular complex)	ko03050(Proteasome)
PC-3p-122748_59	XM_016093321.2	472	495	485	-43.4	-29.5	0.679724	6	2-6,494-490;7-12,488-483;14-16,482-480;18-24,478-472	1-1,495-495[UP5];x-x,489-489[BULt];13-13,x-x[BULq];17-17,479-479[SIL]	(((((((.(((-((((((.(((((.&.)))))-)))))).))).)))))))	AGAAACUGAGG-GCAGUGAGAUUUG&AAAGUC-CACUGCACCUGAGUUUCU	0	0	NA	NA	NA	1	39.6024	4	0.893939	Output/R0h/cleaveLand_result/t_plot/PC-3p-122748_59_XM_016093321.2_485_TPlot.pdf	0	39.6024	-Inf	down	3.1118e-10	6.0287e-10	yes	GO:0030554(adenyl nucleotide binding);GO:0035639(purine ribonucleoside triphosphate binding);GO:0032559(adenyl ribonucleotide binding);GO:1901363(heterocyclic compound binding);GO:0005524(ATP binding);GO:0017076(purine nucleotide binding);GO:1901265(nucleoside phosphate binding);GO:0032555(purine ribonucleotide binding);GO:0043168(anion binding);GO:0036094(small molecule binding);GO:0005488(bindi…	ko03420(Nucleotide excision repair)
PC-3p-122748_59	XM_016093396.2	1388	1413	1404	-43.4	-29	0.668203	10	5-13,1409-1401;14-19,1399-1394;20-24,1392-1388	1-4,1413-1410[UP5];x-x,1400-1400[BULt];x-x,1393-1393[BULt]	(((((.((((((.(((((((((....&....)))))))))-))))))-)))))	AGAGAGUUCAGGCUGCAGUGGAAGAA&AAAGUCCACUGCA-CCUGAG-UUUCU	0	0	NA	NA	NA	1	39.6024	4	0.94112	Output/R0h/cleaveLand_result/t_plot/PC-3p-122748_59_XM_016093396.2_1404_TPlot.pdf	0	39.6024	-Inf	down	3.1118e-10	6.0287e-10	yes	NA	ko03013(RNA transport)
PC-3p-122748_59	XM_016103177.2	1106	1128	1119	-43.4	-32	0.737327	8.5	4-16,1125-1113;19-24,1111-1106	1-3,1128-1126[UP5];17-18,1112-1112[AILq]	((((((.-(((((((((((((...&...)))))))))))))..))))))	GGAAAUG-GGGUGCAGUGGACAAU&AAAGUCCACUGCACCUGAGUUUCU	2	65.368	2	0.269742	Output/R8h/cleaveLand_result/t_plot/PC-3p-122748_59_XM_016103177.2_1119_TPlot.pdf	0	0	NA	NA	NA	65.368	0	Inf	up	6.2072e-16	2.71719e-15	yes	GO:0016787(hydrolase activity);GO:0070011(peptidase activity, acting on L-amino acid peptides);GO:0003824(catalytic activity);GO:0006508(proteolysis);GO:0004175(endopeptidase activity);GO:0019538(protein metabolic process);GO:0008152(metabolic process);GO:1901564(organonitrogen compound metabolic process);GO:0070001(aspartic-type peptidase activity);GO:0006807(nitrogen compound metabolic process)…	ko03010(Ribosome)
PC-3p-122748_59	XM_016112388.2	867	891	882	-43.4	-28.7	0.66129	8.5	2-11,890-881;12-16,879-875;19-23,872-868	1-1,891-891[UP5];x-x,880-880[BULt];17-18,874-873[SIL];24-24,867-867[UP3]	.(((((..(((((.((((((((((.&.))))))))))-)))))..))))).	UGGGAUGAAGGUGAUAGUGGACUUG&AAAGUCCACUG-CACCUGAGUUUCU	1	32.684	4	0.982755	Output/R8h/cleaveLand_result/t_plot/PC-3p-122748_59_XM_016112388.2_882_TPlot.pdf	0	0	NA	NA	NA	32.684	0	Inf	up	1.084e-08	1.2485e-08	yes	GO:0044877(macromolecular complex binding);GO:0004338(glucan exo-1,3-beta-glucosidase activity);GO:0007010(cytoskeleton organization);GO:0030029(actin filament-based process);GO:0005488(binding);GO:0006996(organelle organization);GO:0030036(actin cytoskeleton organization);GO:0032403(protein complex binding);GO:0008152(metabolic process);GO:0016798(hydrolase activity, acting on glycosyl bonds);GO…	ko04626(Plant-pathogen interaction);ko00500(Starch and sucrose metabolism);ko04016(MAPK signaling pathway - plant)
PC-3p-122748_59	XM_021131017.1	1561	1587	1576	-43.4	-29	0.668203	11.5	3-3,1585-1585;5-8,1583-1580;9-13,1577-1573;14-23,1571-1562	1-2,1587-1586[UP5];4-4,1584-1584[SIL];x-x,1579-1578[BULt];x-x,1572-1572[BULt];24-24,1561-1561[UP3]	.((((((((((.(((((..((((.(..&..).))))--)))))-)))))))))).	UGAAGCUCAGGAUGCAGCAUGGAGUCC&AAAGUCCA--CUGCA-CCUGAGUUUCU	1	32.684	4	0.96997	Output/R8h/cleaveLand_result/t_plot/PC-3p-122748_59_XM_021131017.1_1576_TPlot.pdf	1	39.6024	4	0.945296	Output/R0h/cleaveLand_result/t_plot/PC-3p-122748_59_XM_021131017.1_1576_TPlot.pdf	32.684	39.6024	-0.277003	down	0.4158	0.417305	yes	GO:0044260(cellular macromolecule metabolic process);GO:0006468(protein phosphorylation);GO:0051716(cellular response to stimulus);GO:0006796(phosphate-containing compound metabolic process);GO:0006464(cellular protein modification process);GO:0016310(phosphorylation);GO:0007154(cell communication);GO:0035639(purine ribonucleoside triphosphate binding);GO:0016772(transferase activity, transferrin…	NA
PC-3p-122855_59	BGI_novel_T010542	1077	1100	1091	-35.8	-25.1	0.701117	14	7-13,1094-1088;16-23,1085-1078	1-6,1100-1095[UP5];14-15,1087-1086[SIL];24-24,1077-1077[UP3]	.((((((((..(((((((......&......)))))))..)))))))).	CACAAAUCGGAUGGUCCGAAUUGA&AUAAAACGGACCAUACGAUUUGUA	0	0	NA	NA	NA	1	39.6024	4	0.281826	Output/R0h/cleaveLand_result/t_plot/PC-3p-122855_59_BGI_novel_T010542_1091_TPlot.pdf	0	39.6024	-Inf	down	3.1118e-10	6.0287e-10	yes	GO:0016020(membrane);GO:0019867(outer membrane)	NA
PC-3p-122855_59	XM_016079371.2	1780	1803	1794	-35.8	-25.6	0.715084	16.5	8-23,1796-1781	1-7,1803-1797[UP5];24-24,1780-1780[UP3]	.((((((((((((((((.......&.......)))))))))))))))).	AGCAGGUUGUGUGGUCCAACAGGU&AUAAAACGGACCAUACGAUUUGUA	0	0	NA	NA	NA	1	39.6024	4	0.104477	Output/R0h/cleaveLand_result/t_plot/PC-3p-122855_59_XM_016079371.2_1794_TPlot.pdf	0	39.6024	-Inf	down	3.1118e-10	6.0287e-10	yes	GO:0004683(calmodulin-dependent protein kinase activity);GO:0005516(calmodulin binding);GO:0046777(protein autophosphorylation);GO:0071229(cellular response to acid chemical);GO:0044238(primary metabolic process);GO:0043231(intracellular membrane-bounded organelle);GO:0004674(protein serine/threonine kinase activity);GO:0001101(response to acid chemical);GO:0065007(biological regulation);GO:00442…	ko04626(Plant-pathogen interaction)
PC-3p-122855_59	XM_016103523.2	682	705	696	-35.8	-25.1	0.701117	5.5	1-21,705-685	22-24,684-682[UP3]	...(((((((((((((((((((((&)))))))))))))))))))))...	AGAAAAUUGUAUGGUUUGUUUUAU&AUAAAACGGACCAUACGAUUUGUA	2	65.368	3	0.0470383	Output/R8h/cleaveLand_result/t_plot/PC-3p-122855_59_XM_016103523.2_696_TPlot.pdf	1	39.6024	4	0.332762	Output/R0h/cleaveLand_result/t_plot/PC-3p-122855_59_XM_016103523.2_696_TPlot.pdf	65.368	39.6024	0.722997	up	0.011907	0.0127886	yes	NA	NA
PC-3p-122855_59	XM_021139917.1	666	689	680	-35.8	-25.1	0.701117	5.5	1-21,689-669	22-24,668-666[UP3]	...(((((((((((((((((((((&)))))))))))))))))))))...	AGAAAAUUGUAUGGUUUGUUUUAU&AUAAAACGGACCAUACGAUUUGUA	1	32.684	4	0.343973	Output/R8h/cleaveLand_result/t_plot/PC-3p-122855_59_XM_021139917.1_680_TPlot.pdf	0	0	NA	NA	NA	32.684	0	Inf	up	1.084e-08	1.2485e-08	yes	NA	NA
PC-3p-12333_982	BGI_novel_T001902	1420	1444	1435	-42.7	-31.9	0.747073	7	1-9,1444-1436;12-16,1433-1429;18-24,1426-1420	10-11,1435-1434[SIL];17-17,1428-1427[AILt]	(((((((..(((((..(((((((((&)))))))))..)))))-.)))))))	CCAGCAGGAUGGUAUUGCCCAACAA&UUGUUGGGCUUUAUCA-GUUGCUGG	1	32.684	4	0.462721	Output/R8h/cleaveLand_result/t_plot/PC-3p-12333_982_BGI_novel_T001902_1435_TPlot.pdf	0	0	NA	NA	NA	32.684	0	Inf	up	1.084e-08	1.2485e-08	yes	GO:0016887(ATPase activity);GO:0030554(adenyl nucleotide binding);GO:0005886(plasma membrane);GO:0016020(membrane);GO:0071944(cell periphery);GO:0016462(pyrophosphatase activity);GO:0044425(membrane part);GO:0016817(hydrolase activity, acting on acid anhydrides);GO:0043492(ATPase activity, coupled to movement of substances);GO:0005215(transporter activity);GO:0097159(organic cyclic compound bindi…	ko02010(ABC transporters)
PC-3p-12333_982	BGI_novel_T002722	1645	1671	1662	-42.7	-28.2	0.660422	11.5	2-5,1670-1667;7-11,1665-1661;13-18,1660-1655;19-24,1650-1645	1-1,1671-1671[UP5];6-6,1666-1666[SIL];12-12,x-x[BULq];x-x,1654-1651[BULt]	((((((....((((((-(((((.((((.&.)))).))))).))))))----))))))	CCAGCACUUGGCUGAU-AAGCUGGACAU&UUGUUGGGCUUUAUCAGU----UGCUGG	1	32.684	4	0.999982	Output/R8h/cleaveLand_result/t_plot/PC-3p-12333_982_BGI_novel_T002722_1662_TPlot.pdf	0	0	NA	NA	NA	32.684	0	Inf	up	1.084e-08	1.2485e-08	yes	GO:0016887(ATPase activity);GO:0017111(nucleoside-triphosphatase activity);GO:0097159(organic cyclic compound binding);GO:0097367(carbohydrate derivative binding);GO:1901265(nucleoside phosphate binding);GO:0032555(purine ribonucleotide binding);GO:0043168(anion binding);GO:0032553(ribonucleotide binding);GO:0032559(adenyl ribonucleotide binding);GO:0035639(purine ribonucleoside triphosphate bind…	NA
PC-3p-12333_982	BGI_novel_T002788	892	920	906	-42.7	-28.2	0.660422	15.5	2-7,919-914;8-19,908-897;21-24,895-892	1-1,920-920[UP5];x-x,913-909[BULt];20-20,896-896[SIL]	((((.((((((((((((.....((((((.&.))))))-----)))))))))))).))))	CCAGGAAUUGAUGAGGUUUGCUCCAACAC&UUGUUGG-----GCUUUAUCAGUUGCUGG	0	0	NA	NA	NA	1	39.6024	4	0.999859	Output/R0h/cleaveLand_result/t_plot/PC-3p-12333_982_BGI_novel_T002788_906_TPlot.pdf	0	39.6024	-Inf	down	3.1118e-10	6.0287e-10	yes	GO:0072655(establishment of protein localization to mitochondrion);GO:0031224(intrinsic component of membrane);GO:0070727(cellular macromolecule localization);GO:0032555(purine ribonucleotide binding);GO:0006886(intracellular protein transport);GO:0043226(organelle);GO:1901265(nucleoside phosphate binding);GO:0044429(mitochondrial part);GO:0015031(protein transport);GO:0044237(cellular metabolic …	NA
PC-3p-12333_982	BGI_novel_T010676	1292	1315	1306	-42.7	-28.3	0.662763	9.5	1-5,1315-1311;7-12,1309-1304;14-22,1302-1294;24-24,1292-1292	6-6,1310-1310[SIL];13-13,1303-1303[SIL];23-23,1293-1293[SIL]	(.(((((((((.((((((.(((((&))))).)))))).))))))))).)	CGGGCGGCUGAGGGAGUCGGACAA&UUGUUGGGCUUUAUCAGUUGCUGG	0	0	NA	NA	NA	1	39.6024	4	0.999721	Output/R0h/cleaveLand_result/t_plot/PC-3p-12333_982_BGI_novel_T010676_1306_TPlot.pdf	0	39.6024	-Inf	down	3.1118e-10	6.0287e-10	yes	GO:0016740(transferase activity);GO:0016758(transferase activity, transferring hexosyl groups);GO:0003824(catalytic activity);GO:0008194(UDP-glycosyltransferase activity);GO:0016757(transferase activity, transferring glycosyl groups);GO:0008375(acetylglucosaminyltransferase activity);GO:0016020(membrane)	NA
PC-3p-12333_982	BGI_novel_T011034	632	655	646	-42.7	-28.5	0.667447	13	3-5,653-651;7-23,649-633	1-2,655-654[UP5];6-6,650-650[SIL];24-24,632-632[UP3]	.(((((((((((((((((.(((..&..))).))))))))))))))))).	GCAGCAGCUGGUGGAGUUGGAUCC&UUGUUGGGCUUUAUCAGUUGCUGG	0	0	NA	NA	NA	1	39.6024	4	0.999373	Output/R0h/cleaveLand_result/t_plot/PC-3p-12333_982_BGI_novel_T011034_646_TPlot.pdf	0	39.6024	-Inf	down	3.1118e-10	6.0287e-10	yes	GO:0044464(cell part);GO:0005623(cell);GO:0003824(catalytic activity);GO:0006950(response to stress);GO:0016491(oxidoreductase activity);GO:0043167(ion binding);GO:0055114(oxidation-reduction process);GO:0006979(response to oxidative stress);GO:0046914(transition metal ion binding);GO:0005737(cytoplasm);GO:0033554(cellular response to stress);GO:0051716(cellular response to stimulus);GO:0070887(c…	NA
PC-3p-12333_982	BGI_novel_T011294	556	579	570	-42.7	-28.8	0.674473	11	1-4,579-576;6-6,574-574;8-9,572-571;12-24,568-556	5-5,575-575[SIL];7-7,573-573[SIL];10-11,570-569[SIL]	(((((((((((((..((.(.((((&)))).).))..)))))))))))))	CCGGCGACUGGUACUGCGCCGCAG&UUGUUGGGCUUUAUCAGUUGCUGG	1	32.684	4	0.999382	Output/R8h/cleaveLand_result/t_plot/PC-3p-12333_982_BGI_novel_T011294_570_TPlot.pdf	0	0	NA	NA	NA	32.684	0	Inf	up	1.084e-08	1.2485e-08	yes	GO:0046914(transition metal ion binding);GO:0008270(zinc ion binding);GO:0043169(cation binding);GO:0043167(ion binding);GO:0005488(binding);GO:0046872(metal ion binding)	ko03022(Basal transcription factors)
PC-3p-12333_982	BGI_novel_T011295	1022	1045	1036	-42.7	-28.8	0.674473	11	1-4,1045-1042;6-6,1040-1040;8-9,1038-1037;12-24,1034-1022	5-5,1041-1041[SIL];7-7,1039-1039[SIL];10-11,1036-1035[SIL]	(((((((((((((..((.(.((((&)))).).))..)))))))))))))	CCGGCGACUGGUACUGCGCCGCAG&UUGUUGGGCUUUAUCAGUUGCUGG	1	32.684	4	0.999505	Output/R8h/cleaveLand_result/t_plot/PC-3p-12333_982_BGI_novel_T011295_1036_TPlot.pdf	0	0	NA	NA	NA	32.684	0	Inf	up	1.084e-08	1.2485e-08	yes	GO:0046914(transition metal ion binding);GO:0008270(zinc ion binding);GO:0043169(cation binding);GO:0043167(ion binding);GO:0005488(binding);GO:0046872(metal ion binding)	ko03022(Basal transcription factors)
PC-3p-12333_982	XM_016077957.2	2854	2878	2868	-42.7	-28.76	0.673536	8	1-7,2878-2872;8-12,2870-2866;17-24,2861-2854	x-x,2871-2871[BULt];13-16,2865-2862[SIL]	((((((((....(((((.(((((((&)))))))-)))))....))))))))	CCAGCAACACCAGAAGCACCAGCAA&UUGUUGG-GCUUUAUCAGUUGCUGG	2	65.368	3	0.531279	Output/R8h/cleaveLand_result/t_plot/PC-3p-12333_982_XM_016077957.2_2868_TPlot.pdf	0	0	NA	NA	NA	65.368	0	Inf	up	6.2072e-16	2.71719e-15	yes	GO:0032555(purine ribonucleotide binding);GO:1901265(nucleoside phosphate binding);GO:0043168(anion binding);GO:0005524(ATP binding);GO:0008152(metabolic process);GO:0030554(adenyl nucleotide binding);GO:0035639(purine ribonucleoside triphosphate binding);GO:0016628(oxidoreductase activity, acting on the CH-CH group of donors, NAD or NADP as acceptor);GO:0055114(oxidation-reduction process);GO:00…	NA
PC-3p-12333_982	XM_016080996.2	1475	1499	1490	-42.7	-28.2	0.660422	11	2-3,1498-1497;5-11,1495-1489;13-16,1486-1483;18-24,1481-1475	1-1,1499-1499[UP5];4-4,1496-1496[SIL];12-12,1488-1487[AILt];17-17,1482-1482[SIL]	(((((((.((((..(((((((.((.&.)).)))))))-.)))).)))))))	CCAGCGGGUGAUCUAGGCCCAUUAG&UUGUUGGGCUU-UAUCAGUUGCUGG	1	32.684	4	0.999967	Output/R8h/cleaveLand_result/t_plot/PC-3p-12333_982_XM_016080996.2_1490_TPlot.pdf	0	0	NA	NA	NA	32.684	0	Inf	up	1.084e-08	1.2485e-08	yes	GO:0016616(oxidoreductase activity, acting on the CH-OH group of donors, NAD or NADP as acceptor);GO:0043167(ion binding);GO:0019752(carboxylic acid metabolic process);GO:0005488(binding);GO:0044281(small molecule metabolic process);GO:0009082(branched-chain amino acid biosynthetic process);GO:0009081(branched-chain amino acid metabolic process);GO:0044249(cellular biosynthetic process);GO:000657…	ko01110(Biosynthesis of secondary metabolites);ko00770(Pantothenate and CoA biosynthesis);ko01210(2-Oxocarboxylic acid metabolism);ko00290(Valine, leucine and isoleucine biosynthesis);ko01100(Metabolic pathways);ko01230(Biosynthesis of amino acids)
PC-3p-12333_982	XM_016081730.2	524	547	538	-42.7	-28.5	0.667447	13	3-5,545-543;7-23,541-525	1-2,547-546[UP5];6-6,542-542[SIL];24-24,524-524[UP3]	.(((((((((((((((((.(((..&..))).))))))))))))))))).	GCAGCAGCUGGUGGAGUUGGAUCC&UUGUUGGGCUUUAUCAGUUGCUGG	0	0	NA	NA	NA	1	39.6024	4	0.999189	Output/R0h/cleaveLand_result/t_plot/PC-3p-12333_982_XM_016081730.2_538_TPlot.pdf	0	39.6024	-Inf	down	3.1118e-10	6.0287e-10	yes	GO:0005737(cytoplasm);GO:0005829(cytosol);GO:0005623(cell);GO:0043167(ion binding);GO:0008152(metabolic process);GO:0008270(zinc ion binding);GO:0005488(binding);GO:0005622(intracellular);GO:0016491(oxidoreductase activity);GO:0003824(catalytic activity);GO:0044464(cell part);GO:0046914(transition metal ion binding);GO:0044444(cytoplasmic part);GO:0055114(oxidation-reduction process);GO:0044424(i…	NA
PC-3p-12333_982	XM_016082582.2	568	591	582	-42.7	-28.8	0.674473	11	1-4,591-588;6-6,586-586;8-9,584-583;12-24,580-568	5-5,587-587[SIL];7-7,585-585[SIL];10-11,582-581[SIL]	(((((((((((((..((.(.((((&)))).).))..)))))))))))))	CCGGCGACUGGUACUGCGCCGCAG&UUGUUGGGCUUUAUCAGUUGCUGG	1	32.684	4	0.999434	Output/R8h/cleaveLand_result/t_plot/PC-3p-12333_982_XM_016082582.2_582_TPlot.pdf	1	39.6024	4	0.997966	Output/R0h/cleaveLand_result/t_plot/PC-3p-12333_982_XM_016082582.2_582_TPlot.pdf	32.684	39.6024	-0.277003	down	0.4158	0.417305	yes	GO:0046914(transition metal ion binding);GO:0008270(zinc ion binding);GO:0043169(cation binding);GO:0043167(ion binding);GO:0005488(binding);GO:0046872(metal ion binding)	ko03022(Basal transcription factors)
PC-3p-12333_982	XM_016083797.2	438	464	455	-42.7	-30.3	0.709602	11.5	1-11,464-454;12-19,450-443;21-24,441-438	x-x,453-451[BULt];20-20,442-442[SIL]	((((.((((((((...(((((((((((&)))))))))))---)))))))).))))	CCAGGAGCUGGUGGACAGGUCCAACAG&UUGUUGGGCUU---UAUCAGUUGCUGG	2	65.368	3	0.193154	Output/R8h/cleaveLand_result/t_plot/PC-3p-12333_982_XM_016083797.2_455_TPlot.pdf	0	0	NA	NA	NA	65.368	0	Inf	up	6.2072e-16	2.71719e-15	yes	GO:0009719(response to endogenous stimulus);GO:0042221(response to chemical);GO:0009725(response to hormone);GO:0050896(response to stimulus);GO:0010033(response to organic substance);GO:0009733(response to auxin)	ko04075(Plant hormone signal transduction)
PC-3p-12333_982	XM_016085532.2	1966	1993	1981	-42.7	-29.1	0.681499	10	1-6,1993-1988;7-13,1984-1978;14-24,1976-1966	x-x,1987-1985[BULt];x-x,1977-1977[BULt]	(((((((((((.(((((((...((((((&))))))---)))))))-)))))))))))	UCAGCAACUGGUUGAAGCUGGUCAACAA&UUGUUG---GGCUUUA-UCAGUUGCUGG	0	0	NA	NA	NA	1	39.6024	4	0.993755	Output/R0h/cleaveLand_result/t_plot/PC-3p-12333_982_XM_016085532.2_1981_TPlot.pdf	0	39.6024	-Inf	down	3.1118e-10	6.0287e-10	yes	GO:0006810(transport);GO:0051234(establishment of localization);GO:0005623(cell);GO:0099568(cytoplasmic region);GO:0044464(cell part);GO:0043234(protein complex);GO:0032940(secretion by cell);GO:0044448(cell cortex part);GO:0099023(tethering complex);GO:0032991(macromolecular complex);GO:0009987(cellular process);GO:0044444(cytoplasmic part);GO:0016192(vesicle-mediated transport);GO:0005622(intra…	NA
PC-3p-12333_982	XM_016086990.2	1618	1642	1633	-42.7	-28.8	0.674473	9	3-16,1640-1627;18-24,1624-1618	1-2,1642-1641[UP5];17-17,1626-1625[AILt]	(((((((..((((((((((((((..&..))))))))))))))-.)))))))	UCAGCAGGAUGAUAAGGCUCAGCCU&UUGUUGGGCUUUAUCA-GUUGCUGG	1	32.684	4	0.999526	Output/R8h/cleaveLand_result/t_plot/PC-3p-12333_982_XM_016086990.2_1633_TPlot.pdf	0	0	NA	NA	NA	32.684	0	Inf	up	1.084e-08	1.2485e-08	yes	GO:0032549(ribonucleoside binding);GO:1901265(nucleoside phosphate binding);GO:0017111(nucleoside-triphosphatase activity);GO:0036094(small molecule binding);GO:0044249(cellular biosynthetic process);GO:0044238(primary metabolic process);GO:1901564(organonitrogen compound metabolic process);GO:0017076(purine nucleotide binding);GO:0003924(GTPase activity);GO:1901363(heterocyclic compound binding)…	ko03013(RNA transport)
PC-3p-12333_982	XM_016089538.2	1030	1058	1044	-42.7	-28.1	0.65808	14.5	1-2,1058-1057;4-8,1055-1051;9-23,1045-1031	3-3,1056-1056[SIL];x-x,1050-1046[BULt];24-24,1030-1030[UP3]	.(((((((((((((((.....(((((.((&)).)))))-----))))))))))))))).	GCAGCAAUUGAUGAAGGUUUACCCAAGAA&UUGUUGGG-----CUUUAUCAGUUGCUGG	2	65.368	2	0.977846	Output/R8h/cleaveLand_result/t_plot/PC-3p-12333_982_XM_016089538.2_1044_TPlot.pdf	0	0	NA	NA	NA	65.368	0	Inf	up	6.2072e-16	2.71719e-15	yes	GO:0016705(oxidoreductase activity, acting on paired donors, with incorporation or reduction of molecular oxygen);GO:0055114(oxidation-reduction process);GO:0043167(ion binding);GO:1901363(heterocyclic compound binding);GO:0043169(cation binding);GO:0044425(membrane part);GO:0046872(metal ion binding);GO:0016020(membrane);GO:0046906(tetrapyrrole binding);GO:0016491(oxidoreductase activity);GO:009…	NA
PC-3p-12333_982	XM_016089564.2	368	391	382	-42.7	-29.2	0.683841	6.5	2-12,390-380;15-20,377-372;23-24,369-368	1-1,391-391[UP5];13-14,379-378[SIL];21-22,371-370[SIL]	((..((((((..(((((((((((.&.)))))))))))..))))))..))	CCCUCAGCUGUGAAAGCCCAGCAU&UUGUUGGGCUUUAUCAGUUGCUGG	1	32.684	4	0.997384	Output/R8h/cleaveLand_result/t_plot/PC-3p-12333_982_XM_016089564.2_382_TPlot.pdf	0	0	NA	NA	NA	32.684	0	Inf	up	1.084e-08	1.2485e-08	yes	NA	NA
PC-3p-12333_982	XM_016089734.2	285	309	300	-42.7	-28.1	0.65808	8.5	3-16,307-294;18-21,292-289;22-24,287-285	1-2,309-308[UP5];17-17,293-293[SIL];x-x,288-288[BULt]	(((.((((.((((((((((((((..&..)))))))))))))).))))-)))	CUAUGUAGGUGAUGAAGCCCAAUCC&UUGUUGGGCUUUAUCAGUUGC-UGG	0	0	NA	NA	NA	2	79.2048	3	0.504564	Output/R0h/cleaveLand_result/t_plot/PC-3p-12333_982_XM_016089734.2_300_TPlot.pdf	0	79.2048	-Inf	down	5.5905e-19	3.89431e-18	yes	GO:0005524(ATP binding);GO:0035639(purine ribonucleoside triphosphate binding);GO:0017076(purine nucleotide binding);GO:0032553(ribonucleotide binding);GO:0032555(purine ribonucleotide binding);GO:1901265(nucleoside phosphate binding);GO:0097367(carbohydrate derivative binding);GO:0097159(organic cyclic compound binding);GO:0005488(binding);GO:1901363(heterocyclic compound binding);GO:0043167(ion…	NA
PC-3p-12333_982	XM_016089735.2	333	357	348	-42.7	-28.1	0.65808	8.5	3-16,355-342;18-21,340-337;22-24,335-333	1-2,357-356[UP5];17-17,341-341[SIL];x-x,336-336[BULt]	(((.((((.((((((((((((((..&..)))))))))))))).))))-)))	CUAUGUAGGUGAUGAAGCCCAAUCC&UUGUUGGGCUUUAUCAGUUGC-UGG	1	32.684	4	0.999986	Output/R8h/cleaveLand_result/t_plot/PC-3p-12333_982_XM_016089735.2_348_TPlot.pdf	2	79.2048	2	0.939137	Output/R0h/cleaveLand_result/t_plot/PC-3p-12333_982_XM_016089735.2_348_TPlot.pdf	32.684	79.2048	-1.277	down	1.092e-05	1.21603e-05	yes	GO:0017076(purine nucleotide binding);GO:0000166(nucleotide binding);GO:1901363(heterocyclic compound binding);GO:0032553(ribonucleotide binding);GO:0043167(ion binding);GO:0030554(adenyl nucleotide binding);GO:0043168(anion binding);GO:0005488(binding);GO:1901265(nucleoside phosphate binding);GO:0097367(carbohydrate derivative binding);GO:0032559(adenyl ribonucleotide binding);GO:0036094(small m…	NA
PC-3p-12333_982	XM_016089736.2	335	359	350	-42.7	-28.1	0.65808	8.5	3-16,357-344;18-21,342-339;22-24,337-335	1-2,359-358[UP5];17-17,343-343[SIL];x-x,338-338[BULt]	(((.((((.((((((((((((((..&..)))))))))))))).))))-)))	CUAUGUAGGUGAUGAAGCCCAAUCC&UUGUUGGGCUUUAUCAGUUGC-UGG	1	32.684	4	0.999985	Output/R8h/cleaveLand_result/t_plot/PC-3p-12333_982_XM_016089736.2_350_TPlot.pdf	1	39.6024	4	0.9999	Output/R0h/cleaveLand_result/t_plot/PC-3p-12333_982_XM_016089736.2_350_TPlot.pdf	32.684	39.6024	-0.277003	down	0.4158	0.417305	yes	GO:0017076(purine nucleotide binding);GO:0000166(nucleotide binding);GO:1901363(heterocyclic compound binding);GO:0032553(ribonucleotide binding);GO:0043167(ion binding);GO:0030554(adenyl nucleotide binding);GO:0043168(anion binding);GO:0005488(binding);GO:1901265(nucleoside phosphate binding);GO:0097367(carbohydrate derivative binding);GO:0032559(adenyl ribonucleotide binding);GO:0036094(small m…	NA
PC-3p-12333_982	XM_016095046.2	919	942	933	-42.7	-30.4	0.711944	9	1-18,942-925;20-22,923-921	19-19,924-924[SIL];23-24,920-919[UP3]	..(((.((((((((((((((((((&)))))))))))))))))).)))..	GAAGCCGCUGGUGAAGUCCGGCGA&UUGUUGGGCUUUAUCAGUUGCUGG	1	32.684	4	0.758279	Output/R8h/cleaveLand_result/t_plot/PC-3p-12333_982_XM_016095046.2_933_TPlot.pdf	0	0	NA	NA	NA	32.684	0	Inf	up	1.084e-08	1.2485e-08	yes	GO:0008168(methyltransferase activity);GO:0003824(catalytic activity);GO:0016741(transferase activity, transferring one-carbon groups);GO:0008152(metabolic process);GO:0016740(transferase activity);GO:0032259(methylation);GO:0016021(integral component of membrane);GO:0044425(membrane part);GO:0031224(intrinsic component of membrane);GO:0016020(membrane)	NA
PC-3p-12333_982	XM_016096512.2	2143	2166	2157	-42.7	-28.5	0.667447	6.5	2-3,2165-2164;5-14,2162-2153;17-24,2150-2143	1-1,2166-2166[UP5];4-4,2163-2163[SIL];15-16,2152-2151[SIL]	((((((((..((((((((((.((.&.)).))))))))))..))))))))	CCGGCAACCAAUAAAGCCUAUCAC&UUGUUGGGCUUUAUCAGUUGCUGG	1	32.684	4	0.999847	Output/R8h/cleaveLand_result/t_plot/PC-3p-12333_982_XM_016096512.2_2157_TPlot.pdf	1	39.6024	4	0.999313	Output/R0h/cleaveLand_result/t_plot/PC-3p-12333_982_XM_016096512.2_2157_TPlot.pdf	32.684	39.6024	-0.277003	down	0.4158	0.417305	yes	GO:0090304(nucleic acid metabolic process);GO:0044428(nuclear part);GO:0034660(ncRNA metabolic process);GO:0043414(macromolecule methylation);GO:1990904(ribonucleoprotein complex);GO:0031974(membrane-enclosed lumen);GO:0001510(RNA methylation);GO:0043412(macromolecule modification);GO:0046483(heterocycle metabolic process);GO:0016070(RNA metabolic process);GO:0016741(transferase activity, transfe…	NA
PC-3p-12333_982	XM_016101716.2	568	595	585	-42.7	-31.5	0.737705	7	1-7,595-589;8-17,587-578;18-20,575-573;21-24,571-568	x-x,588-588[BULt];x-x,577-576[BULt];x-x,572-572[BULt]	((((.(((..((((((((((.(((((((&)))))))-))))))))))--)))-))))	CCAGACAAUUCUGAUGAAGCACCAGCAA&UUGUUGG-GCUUUAUCAG--UUG-CUGG	1	32.684	4	0.597342	Output/R8h/cleaveLand_result/t_plot/PC-3p-12333_982_XM_016101716.2_585_TPlot.pdf	0	0	NA	NA	NA	32.684	0	Inf	up	1.084e-08	1.2485e-08	yes	GO:0043229(intracellular organelle);GO:2000112(regulation of cellular macromolecule biosynthetic process);GO:0003677(DNA binding);GO:0050789(regulation of biological process);GO:0010468(regulation of gene expression);GO:0044464(cell part);GO:0051171(regulation of nitrogen compound metabolic process);GO:0006355(regulation of transcription, DNA-templated);GO:0019219(regulation of nucleobase-contain…	NA
PC-3p-12333_982	XM_016102403.2	1638	1663	1655	-42.7	-29.7	0.69555	8.5	1-8,1663-1656;10-18,1655-1647;19-23,1643-1639	9-9,x-x[BULq];x-x,1646-1644[BULt];24-24,1638-1638[UP3]	.(((((...(((((((((-((((((((&)))))))).)))))))))---))))).	GCAGCAUAUGCUGAUGAA-CCCAGCAA&UUGUUGGGCUUUAUCAGU---UGCUGG	0	0	NA	NA	NA	1	39.6024	4	0.9635	Output/R0h/cleaveLand_result/t_plot/PC-3p-12333_982_XM_016102403.2_1655_TPlot.pdf	0	39.6024	-Inf	down	3.1118e-10	6.0287e-10	yes	GO:0030276(clathrin binding);GO:0030135(coated vesicle);GO:0005622(intracellular);GO:0070271(protein complex biogenesis);GO:0005737(cytoplasm);GO:0022607(cellular component assembly);GO:0006461(protein complex assembly);GO:0044464(cell part);GO:0005488(binding);GO:0043933(macromolecular complex subunit organization);GO:0044085(cellular component biogenesis);GO:0065003(macromolecular complex assem…	NA
PC-3p-12333_982	XM_016102607.2	810	833	824	-42.7	-28.8	0.674473	8	1-6,833-828;8-13,826-821;15-24,819-810	7-7,827-827[SIL];14-14,820-820[SIL]	((((((((((.((((((.((((((&)))))).)))))).))))))))))	CUGGCAGCUGUUGAGGCACAGCAG&UUGUUGGGCUUUAUCAGUUGCUGG	1	32.684	4	0.999515	Output/R8h/cleaveLand_result/t_plot/PC-3p-12333_982_XM_016102607.2_824_TPlot.pdf	0	0	NA	NA	NA	32.684	0	Inf	up	1.084e-08	1.2485e-08	yes	NA	ko04144(Endocytosis)
PC-3p-12333_982	XM_016104994.2	601	623	615	-42.7	-29.5	0.690867	7.5	2-5,622-619;8-23,617-602	1-1,623-623[UP5];6-7,618-618[AILq];24-24,601-601[UP3]	.((((((((((((((((.-((((.&.))))..)))))))))))))))).	ACAGCAACUGGUAAAGCA-AGCAC&UUGUUGGGCUUUAUCAGUUGCUGG	0	0	NA	NA	NA	2	79.2048	2	0.75054	Output/R0h/cleaveLand_result/t_plot/PC-3p-12333_982_XM_016104994.2_615_TPlot.pdf	0	79.2048	-Inf	down	5.5905e-19	3.89431e-18	yes	GO:0005488(binding);GO:1901363(heterocyclic compound binding);GO:0003676(nucleic acid binding);GO:0097159(organic cyclic compound binding)	ko03013(RNA transport);ko03008(Ribosome biogenesis in eukaryotes)
PC-3p-12333_982	XM_016104995.2	603	625	617	-42.7	-29.5	0.690867	7.5	2-5,624-621;8-23,619-604	1-1,625-625[UP5];6-7,620-620[AILq];24-24,603-603[UP3]	.((((((((((((((((.-((((.&.))))..)))))))))))))))).	ACAGCAACUGGUAAAGCA-AGCAC&UUGUUGGGCUUUAUCAGUUGCUGG	1	32.684	4	0.996185	Output/R8h/cleaveLand_result/t_plot/PC-3p-12333_982_XM_016104995.2_617_TPlot.pdf	0	0	NA	NA	NA	32.684	0	Inf	up	1.084e-08	1.2485e-08	yes	GO:0005488(binding);GO:1901363(heterocyclic compound binding);GO:0003676(nucleic acid binding);GO:0097159(organic cyclic compound binding)	ko03013(RNA transport);ko03008(Ribosome biogenesis in eukaryotes)
PC-3p-12333_982	XM_016107701.2	597	622	613	-42.7	-27.8	0.651054	7	1-5,622-618;7-15,616-608;17-24,604-597	6-6,617-617[SIL];16-16,607-605[AILt]	((((((((...(((((((((.(((((&))))).)))))))))--.))))))))	CUAGCAACAAAGAUAAAGCUGAACAG&UUGUUGGGCUUUAUC--AGUUGCUGG	0	0	NA	NA	NA	2	79.2048	2	0.956142	Output/R0h/cleaveLand_result/t_plot/PC-3p-12333_982_XM_016107701.2_613_TPlot.pdf	0	79.2048	-Inf	down	5.5905e-19	3.89431e-18	yes	NA	NA
PC-3p-12333_982	XM_016111496.2	723	747	738	-42.7	-27.8	0.651054	7	2-2,746-746;4-14,744-734;17-18,731-730;19-24,728-723	1-1,747-747[UP5];3-3,745-745[SIL];15-16,733-732[SIL];x-x,729-729[BULt]	((((((.((..(((((((((((.(.&.).)))))))))))..))-))))))	CCAGCAGACCCAUGAAGCCCAAGAU&UUGUUGGGCUUUAUCAGU-UGCUGG	0	0	NA	NA	NA	1	39.6024	4	0.999969	Output/R0h/cleaveLand_result/t_plot/PC-3p-12333_982_XM_016111496.2_738_TPlot.pdf	0	39.6024	-Inf	down	3.1118e-10	6.0287e-10	yes	GO:0016021(integral component of membrane);GO:0044425(membrane part);GO:0031224(intrinsic component of membrane);GO:0016020(membrane)	NA
PC-3p-12333_982	XM_016113888.2	570	593	584	-42.7	-30.4	0.711944	5.5	1-6,593-588;8-18,586-576;21-24,573-570	7-7,587-587[SIL];19-20,575-574[SIL]	((((..(((((((((((.((((((&)))))).)))))))))))..))))	CCAGGCAUUGAUAAAGCGCAACGA&UUGUUGGGCUUUAUCAGUUGCUGG	1	32.684	4	0.735846	Output/R8h/cleaveLand_result/t_plot/PC-3p-12333_982_XM_016113888.2_584_TPlot.pdf	0	0	NA	NA	NA	32.684	0	Inf	up	1.084e-08	1.2485e-08	yes	NA	ko03022(Basal transcription factors);ko03420(Nucleotide excision repair)
PC-3p-12333_982	XM_016117396.2	1293	1314	1307	-42.7	-30	0.702576	11.5	2-8,1313-1307;12-24,1305-1293	1-1,1314-1314[UP5];9-11,1306-1306[AILq]	(((((((((((((.--(((((((.&.)))))))...)))))))))))))	CCGGCGGCUGAUGC--CCCGGCAG&UUGUUGGGCUUUAUCAGUUGCUGG	2	65.368	3	0.278421	Output/R8h/cleaveLand_result/t_plot/PC-3p-12333_982_XM_016117396.2_1307_TPlot.pdf	5	198.012	2	0.562868	Output/R0h/cleaveLand_result/t_plot/PC-3p-12333_982_XM_016117396.2_1307_TPlot.pdf	65.368	198.012	-1.59893	down	2.988e-16	2.0038e-15	yes	NA	NA
PC-3p-12333_982	XM_021128694.1	1198	1222	1213	-42.7	-27.9	0.653396	9	2-10,1221-1213;13-17,1211-1207;19-24,1203-1198	1-1,1222-1222[UP5];11-12,1212-1212[AILq];18-18,1206-1204[AILt]	((((((...(((((.-(((((((((.&.)))))))))..)))))--.))))))	CCAGCACAUCUGAUC-AGCCCAAUAU&UUGUUGGGCUUUAUCAG--UUGCUGG	1	32.684	4	0.999993	Output/R8h/cleaveLand_result/t_plot/PC-3p-12333_982_XM_021128694.1_1213_TPlot.pdf	0	0	NA	NA	NA	32.684	0	Inf	up	1.084e-08	1.2485e-08	yes	NA	NA
PC-3p-12333_982	XM_021129277.1	3634	3656	3647	-42.7	-29.9	0.700234	7.5	1-11,3656-3646;13-24,3645-3634	12-12,x-x[BULq]	((((((((((((-(((((((((((&))))))))))).))))))))))))	CCGGCAACUGGU-AGGCCUAGUAG&UUGUUGGGCUUUAUCAGUUGCUGG	0	0	NA	NA	NA	1	39.6024	4	0.942193	Output/R0h/cleaveLand_result/t_plot/PC-3p-12333_982_XM_021129277.1_3647_TPlot.pdf	0	39.6024	-Inf	down	3.1118e-10	6.0287e-10	yes	GO:0005623(cell);GO:0060255(regulation of macromolecule metabolic process);GO:0019219(regulation of nucleobase-containing compound metabolic process);GO:0044260(cellular macromolecule metabolic process);GO:0050789(regulation of biological process);GO:0019538(protein metabolic process);GO:0005737(cytoplasm);GO:2000112(regulation of cellular macromolecule biosynthetic process);GO:0044444(cytoplasmi…	ko00480(Glutathione metabolism);ko04016(MAPK signaling pathway - plant);ko04075(Plant hormone signal transduction)
PC-3p-12333_982	XM_021131518.1	1527	1551	1542	-42.7	-28.8	0.674473	9	3-16,1549-1536;18-24,1533-1527	1-2,1551-1550[UP5];17-17,1535-1534[AILt]	(((((((..((((((((((((((..&..))))))))))))))-.)))))))	UCAGCAGGAUGAUAAGGCUCAGCCU&UUGUUGGGCUUUAUCA-GUUGCUGG	0	0	NA	NA	NA	2	79.2048	2	0.850343	Output/R0h/cleaveLand_result/t_plot/PC-3p-12333_982_XM_021131518.1_1542_TPlot.pdf	0	79.2048	-Inf	down	5.5905e-19	3.89431e-18	yes	GO:0032549(ribonucleoside binding);GO:1901265(nucleoside phosphate binding);GO:0017111(nucleoside-triphosphatase activity);GO:0036094(small molecule binding);GO:0044249(cellular biosynthetic process);GO:0044238(primary metabolic process);GO:1901564(organonitrogen compound metabolic process);GO:0017076(purine nucleotide binding);GO:0003924(GTPase activity);GO:1901363(heterocyclic compound binding)…	ko03013(RNA transport)
PC-3p-12333_982	XM_021131735.1	592	619	610	-42.7	-28.6	0.669789	11	3-17,617-603;18-24,598-592	1-2,619-618[UP5];x-x,602-599[BULt]	(((((((....(((((((((((((((..&..)))))))))))))))----)))))))	CCAGCAAUGCCCUGAUAAGGUUCAAUGG&UUGUUGGGCUUUAUCAG----UUGCUGG	1	32.684	4	0.999782	Output/R8h/cleaveLand_result/t_plot/PC-3p-12333_982_XM_021131735.1_610_TPlot.pdf	0	0	NA	NA	NA	32.684	0	Inf	up	1.084e-08	1.2485e-08	yes	GO:0003824(catalytic activity);GO:0016757(transferase activity, transferring glycosyl groups);GO:0016740(transferase activity)	ko00052(Galactose metabolism)
PC-3p-12333_982	XM_021137289.1	1032	1060	1046	-42.7	-28.2	0.660422	15.5	2-7,1059-1054;8-19,1048-1037;21-24,1035-1032	1-1,1060-1060[UP5];x-x,1053-1049[BULt];20-20,1036-1036[SIL]	((((.((((((((((((.....((((((.&.))))))-----)))))))))))).))))	CCAGGAAUUGAUGAGGUUUGCUCCAACAC&UUGUUGG-----GCUUUAUCAGUUGCUGG	1	32.684	4	0.999964	Output/R8h/cleaveLand_result/t_plot/PC-3p-12333_982_XM_021137289.1_1046_TPlot.pdf	0	0	NA	NA	NA	32.684	0	Inf	up	1.084e-08	1.2485e-08	yes	GO:0072655(establishment of protein localization to mitochondrion);GO:0031224(intrinsic component of membrane);GO:0070727(cellular macromolecule localization);GO:0032555(purine ribonucleotide binding);GO:0006886(intracellular protein transport);GO:0043226(organelle);GO:1901265(nucleoside phosphate binding);GO:0044429(mitochondrial part);GO:0015031(protein transport);GO:0044237(cellular metabolic …	NA
PC-3p-12333_982	XM_021139381.1	477	501	492	-42.7	-30.2	0.70726	8	1-10,501-492;12-16,490-486;18-22,484-480;23-24,478-477	11-11,491-491[SIL];17-17,485-485[SIL];x-x,479-479[BULt]	((.(((((.(((((.((((((((((&)))))))))).))))).)))))-))	CCAAGCAAGUGAUAUGGCUCAGCGA&UUGUUGGGCUUUAUCAGUUGCU-GG	0	0	NA	NA	NA	1	39.6024	4	0.887922	Output/R0h/cleaveLand_result/t_plot/PC-3p-12333_982_XM_021139381.1_492_TPlot.pdf	0	39.6024	-Inf	down	3.1118e-10	6.0287e-10	yes	GO:0034715(pICln-Sm protein complex);GO:0008152(metabolic process);GO:0090304(nucleic acid metabolic process);GO:1990234(transferase complex);GO:0022613(ribonucleoprotein complex biogenesis);GO:0006397(mRNA processing);GO:1901360(organic cyclic compound metabolic process);GO:0071826(ribonucleoprotein complex subunit organization);GO:0022607(cellular component assembly);GO:0016070(RNA metabolic pr…	ko03013(RNA transport)
PC-3p-123460_58	XM_016076439.2	706	720	711	-38.7	-25.5	0.658915	3.5	11-23,719-707	10-10,720-720[SIL];24-24,706-706[UP3]	.(((((((((((((.&.))))))))))))).	CGUCAGGCCCUCCGU&AAAUACAAAUCGGAG	0	0	NA	NA	NA	1	39.6024	4	0.78666	Output/R0h/cleaveLand_result/t_plot/PC-3p-123460_58_XM_016076439.2_711_TPlot.pdf	0	39.6024	-Inf	down	3.1118e-10	6.0287e-10	yes	GO:0051234(establishment of localization);GO:1901564(organonitrogen compound metabolic process);GO:0006518(peptide metabolic process);GO:0010467(gene expression);GO:0044238(primary metabolic process);GO:0043604(amide biosynthetic process);GO:0044249(cellular biosynthetic process);GO:0051179(localization);GO:0044260(cellular macromolecule metabolic process);GO:0031224(intrinsic component of membra…	NA
PC-3p-123460_58	XM_016103768.2	1857	1881	1871	-38.7	-28.1	0.726098	11.5	1-6,1881-1876;11-24,1870-1857	7-10,1875-1871[AILt]	((((((((((((((.....((((((&))))))-....))))))))))))))	AGUCAGGCCUUCCGUUAUGGUAUUU&AAAUAC-AAAUCGGAGGGUCUGAUU	1	32.684	4	0.47451	Output/R8h/cleaveLand_result/t_plot/PC-3p-123460_58_XM_016103768.2_1871_TPlot.pdf	0	0	NA	NA	NA	32.684	0	Inf	up	1.084e-08	1.2485e-08	yes	GO:0043229(intracellular organelle);GO:0044437(vacuolar part);GO:0043227(membrane-bounded organelle);GO:0005774(vacuolar membrane);GO:0044464(cell part);GO:0044424(intracellular part);GO:0044446(intracellular organelle part);GO:0005773(vacuole);GO:0098588(bounding membrane of organelle);GO:0044444(cytoplasmic part);GO:0044422(organelle part);GO:0031090(organelle membrane);GO:0005623(cell);GO:0016…	NA
PC-3p-123460_58	XM_016117292.2	1880	1903	1894	-38.7	-25.5	0.658915	14.5	6-8,1898-1896;10-21,1894-1883	1-5,1903-1899[UP5];9-9,1895-1895[SIL];22-24,1882-1880[UP3]	...((((((((((((.(((.....&.....))).))))))))))))...	AUCCAGAUCCUCCGAGUUGGACAG&AAAUACAAAUCGGAGGGUCUGAUU	2	65.368	2	0.462717	Output/R8h/cleaveLand_result/t_plot/PC-3p-123460_58_XM_016117292.2_1894_TPlot.pdf	0	0	NA	NA	NA	65.368	0	Inf	up	6.2072e-16	2.71719e-15	yes	GO:0016020(membrane);GO:0016021(integral component of membrane);GO:0031224(intrinsic component of membrane);GO:0044425(membrane part)	ko01100(Metabolic pathways);ko00600(Sphingolipid metabolism)
PC-3p-123460_58	XM_021127629.1	718	732	723	-38.7	-25.5	0.658915	3.5	11-23,731-719	10-10,732-732[SIL];24-24,718-718[UP3]	.(((((((((((((.&.))))))))))))).	CGUCAGGCCCUCCGU&AAAUACAAAUCGGAG	0	0	NA	NA	NA	1	39.6024	4	0.774558	Output/R0h/cleaveLand_result/t_plot/PC-3p-123460_58_XM_021127629.1_723_TPlot.pdf	0	39.6024	-Inf	down	3.1118e-10	6.0287e-10	yes	GO:0051234(establishment of localization);GO:1901564(organonitrogen compound metabolic process);GO:0006518(peptide metabolic process);GO:0010467(gene expression);GO:0044238(primary metabolic process);GO:0043604(amide biosynthetic process);GO:0044249(cellular biosynthetic process);GO:0051179(localization);GO:0044260(cellular macromolecule metabolic process);GO:0031224(intrinsic component of membra…	NA
PC-3p-123460_58	XM_021140428.1	452	476	467	-38.7	-25.2	0.651163	7.5	1-3,476-474;5-18,472-459;19-22,457-454	4-4,473-473[SIL];x-x,458-458[BULt];23-24,453-452[UP3]	..((((.((((((((((((((.(((&))).))))))))))))))-))))..	GCUCAGCAUCCUCUGGUUUGUUUUU&AAAUACAAAUCGGAGGGU-CUGAUU	0	0	NA	NA	NA	1	39.6024	4	0.819205	Output/R0h/cleaveLand_result/t_plot/PC-3p-123460_58_XM_021140428.1_467_TPlot.pdf	0	39.6024	-Inf	down	3.1118e-10	6.0287e-10	yes	NA	NA
PC-3p-124350_58	BGI_novel_T003600	789	811	802	-36.6	-25.8	0.704918	8	4-12,808-800;14-19,799-794;21-24,792-789	1-3,811-809[UP5];13-13,x-x[BULq];20-20,793-793[SIL]	((((.((((((-(((((((((...&...))))))))).)))))).))))	GGUAUAUCCGC-AUCCGAUCUCAG&AUAAGAUCGGAUUGUGGAUUUAUC	1	32.684	4	0.216557	Output/R8h/cleaveLand_result/t_plot/PC-3p-124350_58_BGI_novel_T003600_802_TPlot.pdf	0	0	NA	NA	NA	32.684	0	Inf	up	1.084e-08	1.2485e-08	yes	NA	ko03420(Nucleotide excision repair);ko03430(Mismatch repair);ko03030(DNA replication);ko03440(Homologous recombination)
PC-3p-124350_58	BGI_novel_T003933	229	251	242	-36.6	-24.2	0.661202	9	4-12,248-240;14-22,239-231	1-3,251-249[UP5];13-13,x-x[BULq];23-24,230-229[UP3]	..(((((((((-(((((((((...&...))))))))).)))))))))..	UCUAAAUCCAC-AUCUGAUCUAAG&AUAAGAUCGGAUUGUGGAUUUAUC	1	32.684	4	0.851636	Output/R8h/cleaveLand_result/t_plot/PC-3p-124350_58_BGI_novel_T003933_242_TPlot.pdf	0	0	NA	NA	NA	32.684	0	Inf	up	1.084e-08	1.2485e-08	yes	NA	NA
PC-3p-124350_58	XM_016088092.2	300	323	314	-36.6	-24.4	0.666667	12.5	5-21,319-303;24-24,300-300	1-4,323-320[UP5];22-23,302-301[SIL]	(..(((((((((((((((((....&....)))))))))))))))))..)	GUGAGGUCCACGGUUCGAUCCCAC&AUAAGAUCGGAUUGUGGAUUUAUC	1	32.684	4	0.670227	Output/R8h/cleaveLand_result/t_plot/PC-3p-124350_58_XM_016088092.2_314_TPlot.pdf	1	39.6024	4	0.601307	Output/R0h/cleaveLand_result/t_plot/PC-3p-124350_58_XM_016088092.2_314_TPlot.pdf	32.684	39.6024	-0.277003	down	0.4158	0.417305	yes	GO:0046872(metal ion binding);GO:0009636(response to toxic substance);GO:0006979(response to oxidative stress);GO:0009664(plant-type cell wall organization);GO:0042743(hydrogen peroxide metabolic process);GO:0005488(binding);GO:0050896(response to stimulus);GO:0005618(cell wall);GO:0009505(plant-type cell wall);GO:0016043(cellular component organization);GO:0071554(cell wall organization or bioge…	ko00940(Phenylpropanoid biosynthesis);ko01100(Metabolic pathways);ko01110(Biosynthesis of secondary metabolites)
PC-3p-124350_58	XM_016091002.2	894	917	908	-36.6	-24.3	0.663934	6	1-6,917-912;8-21,910-897;23-24,895-894	7-7,911-911[SIL];22-22,896-896[SIL]	((.((((((((((((((.((((((&)))))).)))))))))))))).))	GAAAGGUUCAUAAUCCGUUCUUGU&AUAAGAUCGGAUUGUGGAUUUAUC	1	32.684	4	0.698233	Output/R8h/cleaveLand_result/t_plot/PC-3p-124350_58_XM_016091002.2_908_TPlot.pdf	0	0	NA	NA	NA	32.684	0	Inf	up	1.084e-08	1.2485e-08	yes	GO:0043167(ion binding);GO:0016021(integral component of membrane);GO:0098662(inorganic cation transmembrane transport);GO:0072509(divalent inorganic cation transmembrane transporter activity);GO:0016462(pyrophosphatase activity);GO:0015662(ATPase activity, coupled to transmembrane movement of ions, phosphorylative mechanism);GO:1901265(nucleoside phosphate binding);GO:0035639(purine ribonucleosi…	NA
PC-3p-124350_58	XM_016092863.2	534	560	551	-36.6	-24.3	0.663934	15	4-12,557-549;13-21,545-537	1-3,560-558[UP5];x-x,548-546[BULt];22-24,536-534[UP3]	...(((((((((...(((((((((...&...)))))))))---)))))))))...	UCCAAGUCCGCAAUCAUCCGAUCUACA&AUAAGAUCGGAU---UGUGGAUUUAUC	0	0	NA	NA	NA	5	198.012	2	0.314537	Output/R0h/cleaveLand_result/t_plot/PC-3p-124350_58_XM_016092863.2_551_TPlot.pdf	0	198.012	-Inf	down	5.6156e-45	3.34138e-43	yes	NA	NA
PC-3p-124350_58	XM_016095321.2	265	288	279	-36.6	-25.3	0.691257	12	6-23,283-266	1-5,288-284[UP5];24-24,265-265[UP3]	.((((((((((((((((((.....&.....)))))))))))))))))).	AAUGGAUCCACAAUCUGAUGCAGU&AUAAGAUCGGAUUGUGGAUUUAUC	0	0	NA	NA	NA	2	79.2048	2	0.176658	Output/R0h/cleaveLand_result/t_plot/PC-3p-124350_58_XM_016095321.2_279_TPlot.pdf	0	79.2048	-Inf	down	5.5905e-19	3.89431e-18	yes	GO:0016791(phosphatase activity);GO:0044237(cellular metabolic process);GO:0006807(nitrogen compound metabolic process);GO:0071704(organic substance metabolic process);GO:1901564(organonitrogen compound metabolic process);GO:0006464(cellular protein modification process);GO:0043170(macromolecule metabolic process);GO:0016311(dephosphorylation);GO:0016787(hydrolase activity);GO:0004721(phosphoprot…	NA
PC-3p-124350_58	XM_021124513.1	1064	1099	1086	-36.6	-23.9	0.653005	27	1-6,1099-1094;7-10,1089-1086;11-24,1077-1064	x-x,1093-1090[BULt];x-x,1085-1078[BULt]	((((((((((((((........((((....((((((&))))))----))))--------))))))))))))))	GAUGAGUCCACAAUGCCAGCUCCCGGGUGUUCUUGU&AUAAGA----UCGG--------AUUGUGGAUUUAUC	1	32.684	4	0.872978	Output/R8h/cleaveLand_result/t_plot/PC-3p-124350_58_XM_021124513.1_1086_TPlot.pdf	0	0	NA	NA	NA	32.684	0	Inf	up	1.084e-08	1.2485e-08	yes	NA	NA
PC-3p-124350_58	XM_021138832.1	929	951	942	-36.6	-24.3	0.663934	9.5	4-12,948-940;14-22,939-931	1-3,951-949[UP5];13-13,x-x[BULq];23-24,930-929[UP3]	..(((((((((-(((((((((...&...))))))))).)))))))))..	UCUGAAUCCAC-AUCUGAUCUAAG&AUAAGAUCGGAUUGUGGAUUUAUC	1	32.684	4	0.818845	Output/R8h/cleaveLand_result/t_plot/PC-3p-124350_58_XM_021138832.1_942_TPlot.pdf	0	0	NA	NA	NA	32.684	0	Inf	up	1.084e-08	1.2485e-08	yes	NA	NA
PC-3p-124677_58	XM_016092951.2	4410	4431	4422	-43.7	-29.6	0.677346	8	2-4,4430-4428;7-12,4425-4420;15-24,4419-4410	1-1,4431-4431[UP5];5-6,4427-4426[SIL];13-14,x-x[BULq]	((((((((((--((((((..(((.&.)))..))))))..))))))))))	GGUGCAGAAG--GGAACGGACGAG&AUCGGACGUUCCGAUUUCUGUACC	3	98.052	2	0.119478	Output/R8h/cleaveLand_result/t_plot/PC-3p-124677_58_XM_016092951.2_4422_TPlot.pdf	1	39.6024	4	0.268496	Output/R0h/cleaveLand_result/t_plot/PC-3p-124677_58_XM_016092951.2_4422_TPlot.pdf	98.052	39.6024	1.30796	up	6.2938e-07	7.14036e-07	yes	GO:0005515(protein binding);GO:0016772(transferase activity, transferring phosphorus-containing groups);GO:0003779(actin binding);GO:0006796(phosphate-containing compound metabolic process);GO:0009987(cellular process);GO:0016740(transferase activity);GO:0016301(kinase activity);GO:0016310(phosphorylation);GO:0006793(phosphorus metabolic process);GO:0003824(catalytic activity);GO:0005488(binding)…	NA
PC-3p-124677_58	XM_016093018.2	666	692	682	-43.7	-28.5	0.652174	8	2-8,691-685;9-16,683-676;17-21,674-670;22-24,668-666	1-1,692-692[UP5];x-x,684-684[BULt];x-x,675-675[BULt];x-x,669-669[BULt]	(((.(((((.((((((((.(((((((.&.)))))))-))))))))-)))))-)))	GGUCACAGAUAAUCGGGAGUGUCUGAA&AUCGGACG-UUCCGAUU-UCUGU-ACC	1	32.684	4	0.826708	Output/R8h/cleaveLand_result/t_plot/PC-3p-124677_58_XM_016093018.2_682_TPlot.pdf	0	0	NA	NA	NA	32.684	0	Inf	up	1.084e-08	1.2485e-08	yes	GO:0051649(establishment of localization in cell);GO:0005622(intracellular);GO:0005623(cell);GO:0010605(negative regulation of macromolecule metabolic process);GO:0051172(negative regulation of nitrogen compound metabolic process);GO:0070727(cellular macromolecule localization);GO:0065007(biological regulation);GO:0006612(protein targeting to membrane);GO:0070972(protein localization to endoplasm…	ko03060(Protein export)
PC-3p-124677_58	XM_016108371.2	1505	1536	1527	-43.7	-28.6	0.654462	14	2-3,1535-1534;5-15,1532-1522;16-24,1513-1505	1-1,1536-1536[UP5];4-4,1533-1533[SIL];x-x,1521-1514[BULt]	(((((((((........(((((((((((.((.&.)).)))))))))))--------)))))))))	GGUACAGGGUGGUUAUUAUCGGAAUGUUGGAA&AUCGGACGUUCCGAU--------UUCUGUACC	1	32.684	4	0.778807	Output/R8h/cleaveLand_result/t_plot/PC-3p-124677_58_XM_016108371.2_1527_TPlot.pdf	0	0	NA	NA	NA	32.684	0	Inf	up	1.084e-08	1.2485e-08	yes	GO:0006820(anion transport);GO:0051234(establishment of localization);GO:0015098(molybdate ion transmembrane transporter activity);GO:0022857(transmembrane transporter activity);GO:0051179(localization);GO:0008509(anion transmembrane transporter activity);GO:0006811(ion transport);GO:0015075(ion transmembrane transporter activity);GO:0031224(intrinsic component of membrane);GO:0015698(inorganic a…	NA
PC-3p-127107_56	BGI_novel_T000049	3506	3529	3519	-36.6	-24.4	0.666667	10	1-5,3529-3525;6-11,3523-3518;12-19,3515-3508	x-x,3524-3524[BULt];x-x,3517-3516[BULt];20-21,3507-3506[UP3]	..((((((((..((((((.(((((&)))))-))))))--))))))))..	GUUGGUUCCAGAAGGUUCUUUGGA&UCUAA-GAGCCU--UGGAACCAUA	0	0	NA	NA	NA	2	79.2048	2	0.880819	Output/R0h/cleaveLand_result/t_plot/PC-3p-127107_56_BGI_novel_T000049_3519_TPlot.pdf	0	79.2048	-Inf	down	5.5905e-19	3.89431e-18	yes	NA	NA
PC-3p-127107_56	BGI_novel_T000220	1878	1898	1889	-36.6	-27.1	0.740437	11	6-20,1893-1879	1-5,1898-1894[UP5];21-21,1878-1878[UP3]	.(((((((((((((((.....&.....))))))))))))))).	AAUGGUUCCAAGGUUCAAAAU&UCUAAGAGCCUUGGAACCAUA	1	32.684	4	0.741642	Output/R8h/cleaveLand_result/t_plot/PC-3p-127107_56_BGI_novel_T000220_1889_TPlot.pdf	2	79.2048	2	0.287363	Output/R0h/cleaveLand_result/t_plot/PC-3p-127107_56_BGI_novel_T000220_1889_TPlot.pdf	32.684	79.2048	-1.277	down	1.092e-05	1.21603e-05	yes	GO:0016705(oxidoreductase activity, acting on paired donors, with incorporation or reduction of molecular oxygen);GO:0046872(metal ion binding);GO:0043167(ion binding);GO:0016021(integral component of membrane);GO:0046906(tetrapyrrole binding);GO:0008152(metabolic process);GO:0016020(membrane);GO:0044425(membrane part);GO:0031224(intrinsic component of membrane);GO:0004497(monooxygenase activity)…	ko00906(Carotenoid biosynthesis)
PC-3p-127107_56	BGI_novel_T001990	448	468	459	-36.6	-24.4	0.666667	8.5	1-3,468-466;5-18,464-451	4-4,465-465[SIL];19-21,450-448[UP3]	...((((((((((((((.(((&))).))))))))))))))...	CGAGGUUUCGGGGUUCUCAGA&UCUAAGAGCCUUGGAACCAUA	1	32.684	4	0.999801	Output/R8h/cleaveLand_result/t_plot/PC-3p-127107_56_BGI_novel_T001990_459_TPlot.pdf	0	0	NA	NA	NA	32.684	0	Inf	up	1.084e-08	1.2485e-08	yes	GO:0016021(integral component of membrane);GO:0031224(intrinsic component of membrane);GO:0044425(membrane part);GO:0016020(membrane)	NA
PC-3p-127107_56	BGI_novel_T008904	2588	2611	2599	-36.6	-26.3	0.718579	11	1-3,2611-2609;4-6,2604-2602;8-20,2601-2589	x-x,2608-2605[BULt];7-7,x-x[BULq];21-21,2588-2588[UP3]	.(((((((((((((-(((....(((&)))----))).))))))))))))).	GAUGGUUCCAAGGC-CUUCCCAAGA&UCU----AAGAGCCUUGGAACCAUA	0	0	NA	NA	NA	1	39.6024	4	0.841044	Output/R0h/cleaveLand_result/t_plot/PC-3p-127107_56_BGI_novel_T008904_2599_TPlot.pdf	0	39.6024	-Inf	down	3.1118e-10	6.0287e-10	yes	NA	NA
PC-3p-127107_56	BGI_novel_T011647	1390	1411	1402	-36.6	-23.9	0.653005	9	1-7,1411-1405;9-14,1403-1398;15-19,1396-1392	8-8,1404-1404[SIL];x-x,1397-1397[BULt];20-21,1391-1390[UP3]	..(((((.((((((.(((((((&))))))).))))))-)))))..	CUUGGUUCCCGGGGGUUUUGGA&UCUAAGAGCCUUGG-AACCAUA	1	32.684	4	0.999999	Output/R8h/cleaveLand_result/t_plot/PC-3p-127107_56_BGI_novel_T011647_1402_TPlot.pdf	0	0	NA	NA	NA	32.684	0	Inf	up	1.084e-08	1.2485e-08	yes	GO:0009987(cellular process);GO:0006520(cellular amino acid metabolic process);GO:0006725(cellular aromatic compound metabolic process);GO:0034654(nucleobase-containing compound biosynthetic process);GO:0006807(nitrogen compound metabolic process);GO:0032559(adenyl ribonucleotide binding);GO:0034641(cellular nitrogen compound metabolic process);GO:1901137(carbohydrate derivative biosynthetic proc…	ko01100(Metabolic pathways);ko00240(Pyrimidine metabolism)
PC-3p-127107_56	BGI_novel_T013890	1210	1233	1223	-36.6	-25.1	0.685792	8	1-3,1233-1231;4-14,1229-1219;15-18,1216-1213	x-x,1230-1230[BULt];x-x,1218-1217[BULt];19-21,1212-1210[UP3]	...((((..(((((((((((.(((&)))-)))))))))))--))))...	AACGGUUUGCCGAGGCUCUUAAGA&UCU-AAGAGCCUUGG--AACCAUA	1	32.684	4	0.99456	Output/R8h/cleaveLand_result/t_plot/PC-3p-127107_56_BGI_novel_T013890_1223_TPlot.pdf	0	0	NA	NA	NA	32.684	0	Inf	up	1.084e-08	1.2485e-08	yes	GO:0016787(hydrolase activity);GO:0031224(intrinsic component of membrane);GO:0044425(membrane part);GO:0016021(integral component of membrane);GO:0008152(metabolic process);GO:0016020(membrane);GO:0003824(catalytic activity)	ko00900(Terpenoid backbone biosynthesis)
PC-3p-127107_56	XM_016077051.2	1664	1683	1675	-36.6	-25.3	0.691257	6	1-9,1683-1675;11-14,1674-1671;17-21,1668-1664	10-10,x-x[BULq];15-16,1670-1669[SIL]	(((((..((((-(((((((((&))))))))).))))..)))))	UAUGGGACCGA-GCUCUUGGA&UCUAAGAGCCUUGGAACCAUA	1	32.684	4	0.98556	Output/R8h/cleaveLand_result/t_plot/PC-3p-127107_56_XM_016077051.2_1675_TPlot.pdf	1	39.6024	4	0.970185	Output/R0h/cleaveLand_result/t_plot/PC-3p-127107_56_XM_016077051.2_1675_TPlot.pdf	32.684	39.6024	-0.277003	down	0.4158	0.417305	yes	GO:0044237(cellular metabolic process);GO:0006099(tricarboxylic acid cycle);GO:0019752(carboxylic acid metabolic process);GO:0016740(transferase activity);GO:0072350(tricarboxylic acid metabolic process);GO:0046912(transferase activity, transferring acyl groups, acyl groups converted into alkyl on transfer);GO:0071704(organic substance metabolic process);GO:0044238(primary metabolic process);GO:0…	ko01210(2-Oxocarboxylic acid metabolism);ko00020(Citrate cycle (TCA cycle));ko01200(Carbon metabolism);ko01230(Biosynthesis of amino acids);ko01110(Biosynthesis of secondary metabolites);ko01100(Metabolic pathways);ko00630(Glyoxylate and dicarboxylate metabolism)
PC-3p-127107_56	XM_016078484.2	1117	1137	1128	-36.6	-25.9	0.70765	7	1-3,1137-1135;6-15,1132-1123;17-21,1121-1117	4-5,1134-1133[SIL];16-16,1122-1122[SIL]	(((((.((((((((((..(((&)))..)))))))))).)))))	UGUGGAUCCAAGGCUUGAAGG&UCUAAGAGCCUUGGAACCAUA	0	0	NA	NA	NA	1	39.6024	4	0.887922	Output/R0h/cleaveLand_result/t_plot/PC-3p-127107_56_XM_016078484.2_1128_TPlot.pdf	0	39.6024	-Inf	down	3.1118e-10	6.0287e-10	yes	GO:0044260(cellular macromolecule metabolic process);GO:0008152(metabolic process);GO:0016740(transferase activity);GO:0032555(purine ribonucleotide binding);GO:0016773(phosphotransferase activity, alcohol group as acceptor);GO:0038023(signaling receptor activity);GO:1901363(heterocyclic compound binding);GO:0032553(ribonucleotide binding);GO:0005488(binding);GO:0043168(anion binding);GO:0004871(…	NA
PC-3p-127107_56	XM_016079665.2	358	379	370	-36.6	-24.6	0.672131	9	1-4,379-376;7-10,373-370;11-19,368-360	5-6,375-374[SIL];x-x,369-369[BULt];20-21,359-358[UP3]	..(((((((((.((((..((((&))))..))))-)))))))))..	GCUGGUUCCAAUGGCUACUGGA&UCUAAGAGCC-UUGGAACCAUA	0	0	NA	NA	NA	1	39.6024	4	0.997417	Output/R0h/cleaveLand_result/t_plot/PC-3p-127107_56_XM_016079665.2_370_TPlot.pdf	0	39.6024	-Inf	down	3.1118e-10	6.0287e-10	yes	GO:0004175(endopeptidase activity);GO:0008152(metabolic process);GO:0043231(intracellular membrane-bounded organelle);GO:0071704(organic substance metabolic process);GO:0005623(cell);GO:0044248(cellular catabolic process);GO:0043229(intracellular organelle);GO:0010467(gene expression);GO:0005737(cytoplasm);GO:0070011(peptidase activity, acting on L-amino acid peptides);GO:0044424(intracellular pa…	NA
PC-3p-127107_56	XM_016081719.2	866	887	878	-36.6	-24.3	0.663934	6.5	1-5,887-883;7-14,881-874;15-18,872-869	6-6,882-882[SIL];x-x,873-873[BULt];19-21,868-866[UP3]	...((((.((((((((.(((((&))))).))))))))-))))...	CGGGGUUAUCAAGGCUGUUAGA&UCUAAGAGCCUUGG-AACCAUA	0	0	NA	NA	NA	1	39.6024	4	0.999611	Output/R0h/cleaveLand_result/t_plot/PC-3p-127107_56_XM_016081719.2_878_TPlot.pdf	0	39.6024	-Inf	down	3.1118e-10	6.0287e-10	yes	GO:1901265(nucleoside phosphate binding);GO:1901363(heterocyclic compound binding);GO:0043168(anion binding);GO:0015399(primary active transmembrane transporter activity);GO:0016462(pyrophosphatase activity);GO:0022804(active transmembrane transporter activity);GO:0005524(ATP binding);GO:0042623(ATPase activity, coupled);GO:0003824(catalytic activity);GO:0016887(ATPase activity);GO:0042910(xenobi…	ko00920(Sulfur metabolism);ko02010(ABC transporters);ko03018(RNA degradation)
PC-3p-127107_56	XM_016083821.2	1390	1411	1402	-36.6	-23.9	0.653005	9	1-7,1411-1405;9-14,1403-1398;15-19,1396-1392	8-8,1404-1404[SIL];x-x,1397-1397[BULt];20-21,1391-1390[UP3]	..(((((.((((((.(((((((&))))))).))))))-)))))..	CUUGGUUCCCGGGGGUUUUGGA&UCUAAGAGCCUUGG-AACCAUA	1	32.684	4	0.999999	Output/R8h/cleaveLand_result/t_plot/PC-3p-127107_56_XM_016083821.2_1402_TPlot.pdf	0	0	NA	NA	NA	32.684	0	Inf	up	1.084e-08	1.2485e-08	yes	GO:0009987(cellular process);GO:0006520(cellular amino acid metabolic process);GO:0006725(cellular aromatic compound metabolic process);GO:0034654(nucleobase-containing compound biosynthetic process);GO:0006807(nitrogen compound metabolic process);GO:0032559(adenyl ribonucleotide binding);GO:0034641(cellular nitrogen compound metabolic process);GO:1901137(carbohydrate derivative biosynthetic proc…	ko01100(Metabolic pathways);ko00240(Pyrimidine metabolism)
PC-3p-127107_56	XM_016084542.2	742	765	753	-36.6	-24.6	0.672131	11	1-6,765-760;7-7,756-756;9-18,754-745	x-x,759-757[BULt];8-8,755-755[SIL];19-21,744-742[UP3]	...((((((((((.(...((((((&))))))---).))))))))))...	CAGGGUUCCAAGGGUGGACUUAGA&UCUAAG---AGCCUUGGAACCAUA	2	65.368	2	0.908837	Output/R8h/cleaveLand_result/t_plot/PC-3p-127107_56_XM_016084542.2_753_TPlot.pdf	0	0	NA	NA	NA	65.368	0	Inf	up	6.2072e-16	2.71719e-15	yes	NA	ko00195(Photosynthesis);ko01100(Metabolic pathways)
PC-3p-127107_56	XM_016086001.2	1528	1548	1538	-36.6	-25.3	0.691257	7.5	1-7,1548-1542;8-11,1540-1537;13-18,1536-1531	x-x,1541-1541[BULt];12-12,x-x[BULq];19-21,1530-1528[UP3]	...((((((-((((.(((((((&)))))))-)))).))))))...	UUCGGUUCC-AGGCUUCUUAGG&UCUAAGA-GCCUUGGAACCAUA	0	0	NA	NA	NA	1	39.6024	4	0.974264	Output/R0h/cleaveLand_result/t_plot/PC-3p-127107_56_XM_016086001.2_1538_TPlot.pdf	0	39.6024	-Inf	down	3.1118e-10	6.0287e-10	yes	GO:0005694(chromosome);GO:0000280(nuclear division);GO:0000228(nuclear chromosome);GO:0051321(meiotic cell cycle);GO:0031981(nuclear lumen);GO:0070013(intracellular organelle lumen);GO:0005623(cell);GO:0031974(membrane-enclosed lumen);GO:0009987(cellular process);GO:0044424(intracellular part);GO:0043227(membrane-bounded organelle);GO:0030983(mismatched DNA binding);GO:0022402(cell cycle process)…	ko03430(Mismatch repair)
PC-3p-127107_56	XM_016086845.2	624	643	635	-36.6	-25.2	0.688525	6.5	1-3,643-641;7-21,638-624	4-6,640-639[AILq]	(((((((((((((((..-(((&)))...)))))))))))))))	UAUGGUUUCAAGGCUGA-AGA&UCUAAGAGCCUUGGAACCAUA	1	32.684	4	0.992578	Output/R8h/cleaveLand_result/t_plot/PC-3p-127107_56_XM_016086845.2_635_TPlot.pdf	0	0	NA	NA	NA	32.684	0	Inf	up	1.084e-08	1.2485e-08	yes	GO:0018108(peptidyl-tyrosine phosphorylation);GO:0006468(protein phosphorylation);GO:0006807(nitrogen compound metabolic process);GO:0071704(organic substance metabolic process);GO:1901265(nucleoside phosphate binding);GO:0005524(ATP binding);GO:0035639(purine ribonucleoside triphosphate binding);GO:0032559(adenyl ribonucleotide binding);GO:0003824(catalytic activity);GO:0006464(cellular protein …	ko04626(Plant-pathogen interaction)
PC-3p-127107_56	XM_016086846.2	674	693	685	-36.6	-25.2	0.688525	6.5	1-3,693-691;7-21,688-674	4-6,690-689[AILq]	(((((((((((((((..-(((&)))...)))))))))))))))	UAUGGUUUCAAGGCUGA-AGA&UCUAAGAGCCUUGGAACCAUA	0	0	NA	NA	NA	1	39.6024	4	0.979737	Output/R0h/cleaveLand_result/t_plot/PC-3p-127107_56_XM_016086846.2_685_TPlot.pdf	0	39.6024	-Inf	down	3.1118e-10	6.0287e-10	yes	GO:0018108(peptidyl-tyrosine phosphorylation);GO:0006468(protein phosphorylation);GO:0006807(nitrogen compound metabolic process);GO:0071704(organic substance metabolic process);GO:1901265(nucleoside phosphate binding);GO:0005524(ATP binding);GO:0035639(purine ribonucleoside triphosphate binding);GO:0032559(adenyl ribonucleotide binding);GO:0003824(catalytic activity);GO:0006464(cellular protein …	ko04626(Plant-pathogen interaction)
PC-3p-127107_56	XM_016087079.2	666	687	677	-36.6	-26.5	0.724044	7	1-7,687-681;8-15,679-672;17-18,670-669	x-x,680-680[BULt];16-16,671-671[SIL];19-21,668-666[UP3]	...((.((((((((.(((((((&)))))))-)))))))).))...	ACAGGGUCCAAGGCUUCUUGGA&UCUAAGA-GCCUUGGAACCAUA	1	32.684	4	0.86119	Output/R8h/cleaveLand_result/t_plot/PC-3p-127107_56_XM_016087079.2_677_TPlot.pdf	1	39.6024	4	0.805403	Output/R0h/cleaveLand_result/t_plot/PC-3p-127107_56_XM_016087079.2_677_TPlot.pdf	32.684	39.6024	-0.277003	down	0.4158	0.417305	yes	GO:0016740(transferase activity);GO:0009987(cellular process);GO:0006644(phospholipid metabolic process);GO:0008152(metabolic process);GO:0090407(organophosphate biosynthetic process);GO:0006657(CDP-choline pathway);GO:1901576(organic substance biosynthetic process);GO:0006629(lipid metabolic process);GO:0019637(organophosphate metabolic process);GO:0003824(catalytic activity);GO:0046486(glycerol…	ko00564(Glycerophospholipid metabolism);ko01100(Metabolic pathways)
PC-3p-127107_56	XM_016090403.2	806	829	819	-36.6	-24.2	0.661202	10	2-6,828-824;7-11,822-818;12-18,815-809	1-1,829-829[UP5];x-x,823-823[BULt];x-x,817-816[BULt];19-21,808-806[UP3]	...(((((((..(((((.(((((.&.)))))-)))))--)))))))...	UGCGGUUCCAAAAGGCUACUUAGC&UCUAAG-AGCCU--UGGAACCAUA	0	0	NA	NA	NA	1	39.6024	4	0.999893	Output/R0h/cleaveLand_result/t_plot/PC-3p-127107_56_XM_016090403.2_819_TPlot.pdf	0	39.6024	-Inf	down	3.1118e-10	6.0287e-10	yes	GO:0009719(response to endogenous stimulus);GO:0050896(response to stimulus);GO:0010033(response to organic substance);GO:0042221(response to chemical);GO:0009725(response to hormone);GO:0009733(response to auxin)	ko04075(Plant hormone signal transduction)
PC-3p-127107_56	XM_016092749.2	455	478	469	-36.6	-23.8	0.650273	8.5	1-7,478-472;9-13,470-466;14-20,462-456	8-8,471-471[SIL];x-x,465-463[BULt];21-21,455-455[UP3]	.(((((((...(((((.(((((((&))))))).)))))---))))))).	GGUGGUUCUGUCAAGGGUUUUGGA&UCUAAGAGCCUUG---GAACCAUA	1	32.684	4	0.999999	Output/R8h/cleaveLand_result/t_plot/PC-3p-127107_56_XM_016092749.2_469_TPlot.pdf	0	0	NA	NA	NA	32.684	0	Inf	up	1.084e-08	1.2485e-08	yes	GO:0032774(RNA biosynthetic process);GO:0090304(nucleic acid metabolic process);GO:1901576(organic substance biosynthetic process);GO:0034654(nucleobase-containing compound biosynthetic process);GO:0043170(macromolecule metabolic process);GO:0006139(nucleobase-containing compound metabolic process);GO:0018130(heterocycle biosynthetic process);GO:0034641(cellular nitrogen compound metabolic proces…	NA
PC-3p-127107_56	XM_016093482.2	392	418	408	-36.6	-24.6	0.672131	12	1-3,418-416;5-15,413-403;16-19,397-394	4-4,415-414[AILt];x-x,402-398[BULt];20-21,393-392[UP3]	..((((.....(((((((((((..(((&)))-.)))))))))))-----))))..	CCUGGUUCCUUUCCGAGGCUCUGAAGA&UCU-AAGAGCCUUGGA-----ACCAUA	0	0	NA	NA	NA	1	39.6024	4	0.997687	Output/R0h/cleaveLand_result/t_plot/PC-3p-127107_56_XM_016093482.2_408_TPlot.pdf	0	39.6024	-Inf	down	3.1118e-10	6.0287e-10	yes	GO:0008152(metabolic process);GO:0003954(NADH dehydrogenase activity);GO:0016491(oxidoreductase activity);GO:0003824(catalytic activity);GO:0050136(NADH dehydrogenase (quinone) activity);GO:0008137(NADH dehydrogenase (ubiquinone) activity);GO:0016655(oxidoreductase activity, acting on NAD(P)H, quinone or similar compound as acceptor);GO:0016651(oxidoreductase activity, acting on NAD(P)H);GO:00551…	ko01100(Metabolic pathways);ko00190(Oxidative phosphorylation)
PC-3p-127107_56	XM_016093528.1	799	820	812	-36.6	-24.1	0.65847	10	1-6,820-815;8-10,814-812;11-18,809-802	7-7,x-x[BULq];x-x,811-810[BULt];19-21,801-799[UP3]	...((((((((..(((-((((((&)))))).)))--))))))))...	UGGGGUUCCAACUGGC-CUUGGA&UCUAAGAGCC--UUGGAACCAUA	1	32.684	4	0.999987	Output/R8h/cleaveLand_result/t_plot/PC-3p-127107_56_XM_016093528.1_812_TPlot.pdf	0	0	NA	NA	NA	32.684	0	Inf	up	1.084e-08	1.2485e-08	yes	GO:0008152(metabolic process);GO:0043167(ion binding);GO:0034308(primary alcohol metabolic process);GO:0005488(binding);GO:0055114(oxidation-reduction process);GO:0016491(oxidoreductase activity);GO:0006067(ethanol metabolic process);GO:0043169(cation binding);GO:0006069(ethanol oxidation);GO:0046872(metal ion binding);GO:0016614(oxidoreductase activity, acting on CH-OH group of donors);GO:000827…	ko01200(Carbon metabolism);ko01110(Biosynthesis of secondary metabolites);ko00350(Tyrosine metabolism);ko00071(Fatty acid degradation);ko00010(Glycolysis / Gluconeogenesis);ko01100(Metabolic pathways)
PC-3p-127107_56	XM_016094771.2	79	100	91	-36.6	-24.2	0.661202	11	6-15,95-86;16-21,84-79	1-5,100-96[UP5];x-x,85-85[BULt]	((((((.((((((((((.....&.....))))))))))-))))))	UAUGGUCUCCAAGGUUCAAAAU&UCUAAGAGCCUUGGA-ACCAUA	0	0	NA	NA	NA	1	39.6024	4	0.999889	Output/R0h/cleaveLand_result/t_plot/PC-3p-127107_56_XM_016094771.2_91_TPlot.pdf	0	39.6024	-Inf	down	3.1118e-10	6.0287e-10	yes	NA	NA
PC-3p-127107_56	XM_016101576.2	698	719	710	-36.6	-24	0.655738	6	1-2,719-718;4-14,716-706;15-19,704-700	3-3,717-717[SIL];x-x,705-705[BULt];20-21,699-698[UP3]	..(((((.(((((((((((.((&)).)))))))))))-)))))..	GUUGGUUGCUAAGGCUCUUCGG&UCUAAGAGCCUUGG-AACCAUA	2	65.368	2	0.984062	Output/R8h/cleaveLand_result/t_plot/PC-3p-127107_56_XM_016101576.2_710_TPlot.pdf	0	0	NA	NA	NA	65.368	0	Inf	up	6.2072e-16	2.71719e-15	yes	GO:1901564(organonitrogen compound metabolic process);GO:0003824(catalytic activity);GO:0016740(transferase activity);GO:0009308(amine metabolic process);GO:0006595(polyamine metabolic process);GO:0044237(cellular metabolic process);GO:0008152(metabolic process);GO:0009987(cellular process);GO:0006576(cellular biogenic amine metabolic process);GO:0034641(cellular nitrogen compound metabolic proce…	ko00330(Arginine and proline metabolism);ko00410(beta-Alanine metabolism);ko00480(Glutathione metabolism);ko00270(Cysteine and methionine metabolism);ko01100(Metabolic pathways)
PC-3p-127107_56	XM_016102252.2	771	792	782	-36.6	-24.1	0.65847	10.5	3-8,790-785;9-14,783-778;17-20,775-772	1-2,792-791[UP5];x-x,784-784[BULt];15-16,777-776[SIL];21-21,771-771[UP3]	.((((..((((((.((((((..&..))))))-))))))..)))).	GGUGGGCCCAGGGCCUCUUGAU&UCUAAGAG-CCUUGGAACCAUA	0	0	NA	NA	NA	1	39.6024	4	0.999904	Output/R0h/cleaveLand_result/t_plot/PC-3p-127107_56_XM_016102252.2_782_TPlot.pdf	0	39.6024	-Inf	down	3.1118e-10	6.0287e-10	yes	GO:1900409(positive regulation of cellular response to oxidative stress);GO:1901033(positive regulation of response to reactive oxygen species);GO:0050789(regulation of biological process);GO:1902882(regulation of response to oxidative stress);GO:0044444(cytoplasmic part);GO:0043167(ion binding);GO:0043085(positive regulation of catalytic activity);GO:0005739(mitochondrion);GO:1902884(positive re…	NA
PC-3p-127107_56	XM_016102483.2	248	269	260	-36.6	-24.2	0.661202	8.5	2-12,268-258;13-15,256-254;17-21,252-248	1-1,269-269[UP5];x-x,257-257[BULt];16-16,253-253[SIL]	(((((.(((.(((((((((((.&.)))))))))))-))).)))))	UGUGGGUCCUGGGGUUCUUGGU&UCUAAGAGCCUU-GGAACCAUA	1	32.684	4	0.999961	Output/R8h/cleaveLand_result/t_plot/PC-3p-127107_56_XM_016102483.2_260_TPlot.pdf	0	0	NA	NA	NA	32.684	0	Inf	up	1.084e-08	1.2485e-08	yes	NA	NA
PC-3p-127107_56	XM_016102639.1	966	991	982	-36.6	-25.5	0.696721	14	1-11,991-981;12-17,976-971;18-19,969-968	x-x,980-977[BULt];x-x,970-970[BULt];20-21,967-966[UP3]	..((.((((((....(((((((((((&)))))))))))----))))))-))..	CUUGUGUUCCGGCGGGGGCUCUUGGA&UCUAAGAGCCU----UGGAAC-CAUA	3	98.052	2	0.719842	Output/R8h/cleaveLand_result/t_plot/PC-3p-127107_56_XM_016102639.1_982_TPlot.pdf	0	0	NA	NA	NA	98.052	0	Inf	up	4.0654e-23	4.95325e-22	yes	NA	ko04016(MAPK signaling pathway - plant);ko04626(Plant-pathogen interaction)
PC-3p-127107_56	XM_016102914.2	1855	1875	1866	-36.6	-26	0.710383	8.5	1-3,1875-1873;6-15,1870-1861;17-20,1859-1856	4-5,1872-1871[SIL];16-16,1860-1860[SIL];21-21,1855-1855[UP3]	.((((.((((((((((..(((&)))..)))))))))).)))).	AGUGGAUCCAAGGCUUGGGGA&UCUAAGAGCCUUGGAACCAUA	1	32.684	4	0.922036	Output/R8h/cleaveLand_result/t_plot/PC-3p-127107_56_XM_016102914.2_1866_TPlot.pdf	0	0	NA	NA	NA	32.684	0	Inf	up	1.084e-08	1.2485e-08	yes	GO:0006464(cellular protein modification process);GO:0016740(transferase activity);GO:0035639(purine ribonucleoside triphosphate binding);GO:1901564(organonitrogen compound metabolic process);GO:0043412(macromolecule modification);GO:0016020(membrane);GO:0032553(ribonucleotide binding);GO:1901363(heterocyclic compound binding);GO:0008152(metabolic process);GO:0016773(phosphotransferase activity, …	ko04626(Plant-pathogen interaction)
PC-3p-127107_56	XM_016103236.2	670	690	681	-36.6	-24.4	0.666667	15	8-20,683-671	1-7,690-684[UP5];21-21,670-670[UP3]	.(((((((((((((.......&.......))))))))))))).	CAUGGUUCCGAGGCGGAUCCG&UCUAAGAGCCUUGGAACCAUA	2	65.368	3	0.581731	Output/R8h/cleaveLand_result/t_plot/PC-3p-127107_56_XM_016103236.2_681_TPlot.pdf	1	39.6024	4	0.999338	Output/R0h/cleaveLand_result/t_plot/PC-3p-127107_56_XM_016103236.2_681_TPlot.pdf	65.368	39.6024	0.722997	up	0.011907	0.0127886	yes	NA	NA
PC-3p-127107_56	XM_016104137.2	545	566	556	-36.6	-24.3	0.663934	7	1-7,566-560;9-9,558-558;10-18,556-548	8-8,559-559[SIL];x-x,557-557[BULt];19-21,547-545[UP3]	...(((((((((.(.(((((((&))))))).)-)))))))))...	CAGGGUUCCAAGAGAUCUUAGA&UCUAAGAGC-CUUGGAACCAUA	14	457.576	3	0.618487	Output/R8h/cleaveLand_result/t_plot/PC-3p-127107_56_XM_016104137.2_556_TPlot.pdf	3	118.807	3	0.462336	Output/R0h/cleaveLand_result/t_plot/PC-3p-127107_56_XM_016104137.2_556_TPlot.pdf	457.576	118.807	1.94539	up	3.1714e-45	1.99591e-43	yes	GO:0050896(response to stimulus)	NA
PC-3p-127107_56	XM_016104195.2	386	408	397	-36.6	-27.4	0.748634	6	2-3,407-406;4-8,404-400;9-20,398-387	1-1,408-408[UP5];x-x,405-405[BULt];x-x,399-399[BULt];21-21,386-386[UP3]	.((((((((((((.(((((.((.&.))-)))))-)))))))))))).	GAUGGUUCCAAGGCCUCUUCAGC&UCU-AAGAG-CCUUGGAACCAUA	0	0	NA	NA	NA	1	39.6024	4	0.655856	Output/R0h/cleaveLand_result/t_plot/PC-3p-127107_56_XM_016104195.2_397_TPlot.pdf	0	39.6024	-Inf	down	3.1118e-10	6.0287e-10	yes	GO:0050896(response to stimulus)	NA
PC-3p-127107_56	XM_016104539.2	328	348	339	-36.6	-23.8	0.650273	14.5	7-20,342-329	1-6,348-343[UP5];21-21,328-328[UP3]	.((((((((((((((......&......)))))))))))))).	AGUGGUUCCAGGGUUAACGCC&UCUAAGAGCCUUGGAACCAUA	0	0	NA	NA	NA	1	39.6024	4	0.999993	Output/R0h/cleaveLand_result/t_plot/PC-3p-127107_56_XM_016104539.2_339_TPlot.pdf	0	39.6024	-Inf	down	3.1118e-10	6.0287e-10	yes	GO:0044425(membrane part);GO:0016020(membrane);GO:0016021(integral component of membrane);GO:0031224(intrinsic component of membrane)	NA
PC-3p-127107_56	XM_016107227.2	2192	2213	2203	-36.6	-23.8	0.650273	5.5	1-5,2213-2209;6-8,2207-2205;10-21,2203-2192	x-x,2208-2208[BULt];9-9,2204-2204[SIL]	((((((((((((.(((.(((((&)))))-))).))))))))))))	UAUGGUUUCAAGACUCAUUGGA&UCUAA-GAGCCUUGGAACCAUA	1	32.684	4	1	Output/R8h/cleaveLand_result/t_plot/PC-3p-127107_56_XM_016107227.2_2203_TPlot.pdf	0	0	NA	NA	NA	32.684	0	Inf	up	1.084e-08	1.2485e-08	yes	GO:0000166(nucleotide binding);GO:0005488(binding);GO:0097159(organic cyclic compound binding);GO:1901363(heterocyclic compound binding);GO:1901265(nucleoside phosphate binding);GO:0043170(macromolecule metabolic process);GO:0008152(metabolic process);GO:0036094(small molecule binding);GO:0006807(nitrogen compound metabolic process);GO:1901564(organonitrogen compound metabolic process);GO:0019538…	NA
PC-3p-127107_56	XM_016107834.2	1538	1562	1552	-36.6	-23.9	0.653005	7.5	1-3,1562-1560;4-14,1558-1548;15-20,1544-1539	x-x,1559-1559[BULt];x-x,1547-1545[BULt];21-21,1538-1538[UP3]	.((((((...(((((((((((.(((&)))-)))))))))))---)))))).	GAUGGUUUUGCUGAGGCUCUUGAGA&UCU-AAGAGCCUUGG---AACCAUA	0	0	NA	NA	NA	1	39.6024	4	0.999989	Output/R0h/cleaveLand_result/t_plot/PC-3p-127107_56_XM_016107834.2_1552_TPlot.pdf	0	39.6024	-Inf	down	3.1118e-10	6.0287e-10	yes	GO:0030312(external encapsulating structure);GO:0046556(alpha-L-arabinofuranosidase activity);GO:0044424(intracellular part);GO:0071704(organic substance metabolic process);GO:0016020(membrane);GO:0043226(organelle);GO:0016787(hydrolase activity);GO:0016052(carbohydrate catabolic process);GO:0003824(catalytic activity);GO:0044238(primary metabolic process);GO:0000272(polysaccharide catabolic proc…	ko01100(Metabolic pathways);ko00520(Amino sugar and nucleotide sugar metabolism)
PC-3p-127107_56	XM_016111551.2	801	830	820	-36.6	-25.7	0.702186	22.5	1-4,830-827;6-11,824-819;12-21,810-801	5-5,826-825[AILt];x-x,818-811[BULt]	((((((((((........((((((..((((&))))-.))))))--------))))))))))	UGUGGUUCCAGAACCGCAGGGCUCGGUGGA&UCUA-AGAGCCU--------UGGAACCAUA	0	0	NA	NA	NA	2	79.2048	3	0.184937	Output/R0h/cleaveLand_result/t_plot/PC-3p-127107_56_XM_016111551.2_820_TPlot.pdf	0	79.2048	-Inf	down	5.5905e-19	3.89431e-18	yes	GO:0097159(organic cyclic compound binding);GO:0003676(nucleic acid binding);GO:1901363(heterocyclic compound binding);GO:0005488(binding);GO:0003677(DNA binding)	NA
PC-3p-127107_56	XM_016114373.2	1813	1837	1827	-36.6	-24	0.655738	10.5	2-5,1836-1833;7-15,1830-1822;16-21,1818-1813	1-1,1837-1837[UP5];6-6,1832-1831[AILt];x-x,1821-1819[BULt]	((((((...(((((((((..((((.&.))))-.)))))))))---))))))	UGUGGUUAAUCCAGGGCUGGUUGGG&UCUAA-GAGCCUUGGA---ACCAUA	1	32.684	4	0.999995	Output/R8h/cleaveLand_result/t_plot/PC-3p-127107_56_XM_016114373.2_1827_TPlot.pdf	3	118.807	2	0.952596	Output/R0h/cleaveLand_result/t_plot/PC-3p-127107_56_XM_016114373.2_1827_TPlot.pdf	32.684	118.807	-1.86197	down	2.6057e-12	1.10202e-11	yes	NA	ko03015(mRNA surveillance pathway)
PC-3p-127107_56	XM_016116888.2	2437	2460	2448	-36.6	-26.3	0.718579	11	1-3,2460-2458;4-6,2453-2451;8-20,2450-2438	x-x,2457-2454[BULt];7-7,x-x[BULq];21-21,2437-2437[UP3]	.(((((((((((((-(((....(((&)))----))).))))))))))))).	GAUGGUUCCAAGGC-CUUCCCAAGA&UCU----AAGAGCCUUGGAACCAUA	3	98.052	2	0.537415	Output/R8h/cleaveLand_result/t_plot/PC-3p-127107_56_XM_016116888.2_2448_TPlot.pdf	2	79.2048	2	0.435629	Output/R0h/cleaveLand_result/t_plot/PC-3p-127107_56_XM_016116888.2_2448_TPlot.pdf	98.052	79.2048	0.30796	up	0.15687	0.166896	yes	NA	NA
PC-3p-127107_56	XM_021125451.1	2050	2071	2062	-36.6	-24.4	0.666667	12	6-13,2066-2059;14-19,2057-2052	1-5,2071-2067[UP5];x-x,2058-2058[BULt];20-21,2051-2050[UP3]	..((((((.((((((((.....&.....))))))))-))))))..	UCUGGUUCACAAGGCUCAUCUA&UCUAAGAGCCUUG-GAACCAUA	0	0	NA	NA	NA	1	39.6024	4	0.999274	Output/R0h/cleaveLand_result/t_plot/PC-3p-127107_56_XM_021125451.1_2062_TPlot.pdf	0	39.6024	-Inf	down	3.1118e-10	6.0287e-10	yes	GO:0044425(membrane part);GO:0016020(membrane);GO:0016021(integral component of membrane);GO:0031224(intrinsic component of membrane)	NA
PC-3p-127107_56	XM_021139693.1	1856	1876	1867	-36.6	-26	0.710383	8.5	1-3,1876-1874;6-15,1871-1862;17-20,1860-1857	4-5,1873-1872[SIL];16-16,1861-1861[SIL];21-21,1856-1856[UP3]	.((((.((((((((((..(((&)))..)))))))))).)))).	AGUGGAUCCAAGGCUUGGGGA&UCUAAGAGCCUUGGAACCAUA	1	32.684	4	0.923747	Output/R8h/cleaveLand_result/t_plot/PC-3p-127107_56_XM_021139693.1_1867_TPlot.pdf	0	0	NA	NA	NA	32.684	0	Inf	up	1.084e-08	1.2485e-08	yes	GO:0006464(cellular protein modification process);GO:0016740(transferase activity);GO:0035639(purine ribonucleoside triphosphate binding);GO:1901564(organonitrogen compound metabolic process);GO:0043412(macromolecule modification);GO:0016020(membrane);GO:0032553(ribonucleotide binding);GO:1901363(heterocyclic compound binding);GO:0008152(metabolic process);GO:0016773(phosphotransferase activity, …	ko04626(Plant-pathogen interaction)
PC-3p-12725_949	BGI_novel_T002425	1025	1045	1036	-39.4	-28	0.71066	9	4-9,1042-1037;11-21,1035-1025	1-3,1045-1043[UP5];10-10,1036-1036[SIL]	(((((((((((.((((((...&...)))))).)))))))))))	GAGGGAUCGAGACGGCGGUGC&UUCCCGUCGACUUGAUCUCUC	0	0	NA	NA	NA	1	39.6024	4	0.529539	Output/R0h/cleaveLand_result/t_plot/PC-3p-12725_949_BGI_novel_T002425_1036_TPlot.pdf	0	39.6024	-Inf	down	3.1118e-10	6.0287e-10	yes	NA	NA
PC-3p-12725_949	BGI_novel_T003024	1029	1050	1042	-39.4	-29.3	0.743655	6	1-9,1050-1042;11-18,1041-1034;19-21,1031-1029	10-10,x-x[BULq];x-x,1033-1032[BULt]	(((..((((((((-(((((((((&))))))))).))))))))--)))	GAGGUGGAUCAAG-CGGCGGGAG&UUCCCGUCGACUUGAUCU--CUC	1	32.684	4	0.28309	Output/R8h/cleaveLand_result/t_plot/PC-3p-12725_949_BGI_novel_T003024_1042_TPlot.pdf	0	0	NA	NA	NA	32.684	0	Inf	up	1.084e-08	1.2485e-08	yes	GO:0097159(organic cyclic compound binding);GO:0003676(nucleic acid binding);GO:0003723(RNA binding);GO:0005488(binding);GO:0036094(small molecule binding);GO:1901363(heterocyclic compound binding);GO:0000166(nucleotide binding);GO:1901265(nucleoside phosphate binding)	ko03040(Spliceosome)
PC-3p-12725_949	BGI_novel_T011978	542	563	553	-39.4	-26.1	0.662437	8	1-4,563-560;6-8,557-555;11-21,552-542	5-5,559-558[AILt];9-10,554-553[SIL]	(((((((((((..(((..((((&))))-.)))..)))))))))))	GAGAGAUCAAGAAGACUUGGAA&UUCC-CGUCGACUUGAUCUCUC	0	0	NA	NA	NA	1	39.6024	4	0.99789	Output/R0h/cleaveLand_result/t_plot/PC-3p-12725_949_BGI_novel_T011978_553_TPlot.pdf	0	39.6024	-Inf	down	3.1118e-10	6.0287e-10	yes	NA	ko00052(Galactose metabolism)
PC-3p-12725_949	BGI_novel_T011980	450	471	461	-39.4	-26.1	0.662437	8	1-4,471-468;6-8,465-463;11-21,460-450	5-5,467-466[AILt];9-10,462-461[SIL]	(((((((((((..(((..((((&))))-.)))..)))))))))))	GAGAGAUCAAGAAGACUUGGAA&UUCC-CGUCGACUUGAUCUCUC	1	32.684	4	0.999557	Output/R8h/cleaveLand_result/t_plot/PC-3p-12725_949_BGI_novel_T011980_461_TPlot.pdf	0	0	NA	NA	NA	32.684	0	Inf	up	1.084e-08	1.2485e-08	yes	NA	ko00052(Galactose metabolism)
PC-3p-12725_949	XM_016078066.2	984	1004	995	-39.4	-26.2	0.664975	8	2-4,1003-1001;5-8,999-996;10-21,995-984	1-1,1004-1004[UP5];x-x,1000-1000[BULt];9-9,x-x[BULq]	((((((((((((-((((.(((.&.)))-)))).))))))))))))	GAGGGGUCAGGU-GAUGAGGAC&UUCC-CGUCGACUUGAUCUCUC	2	65.368	3	0.498353	Output/R8h/cleaveLand_result/t_plot/PC-3p-12725_949_XM_016078066.2_995_TPlot.pdf	1	39.6024	4	0.996952	Output/R0h/cleaveLand_result/t_plot/PC-3p-12725_949_XM_016078066.2_995_TPlot.pdf	65.368	39.6024	0.722997	up	0.011907	0.0127886	yes	GO:0043168(anion binding);GO:0046872(metal ion binding);GO:0044434(chloroplast part);GO:0097367(carbohydrate derivative binding);GO:0009408(response to heat);GO:0043227(membrane-bounded organelle);GO:0009628(response to abiotic stimulus);GO:0031975(envelope);GO:0005488(binding);GO:0017076(purine nucleotide binding);GO:0005515(protein binding);GO:0031072(heat shock protein binding);GO:0005524(ATP …	NA
PC-3p-12725_949	XM_016096771.2	1252	1273	1264	-39.4	-27.9	0.708122	6	1-13,1273-1261;15-17,1259-1257;18-21,1255-1252	14-14,1260-1260[SIL];x-x,1256-1256[BULt]	((((.(((.(((((((((((((&))))))))))))).)))-))))	GGGAUGAUGGGGUUGAUGGGAA&UUCCCGUCGACUUGAUC-UCUC	3	98.052	2	0.327457	Output/R8h/cleaveLand_result/t_plot/PC-3p-12725_949_XM_016096771.2_1264_TPlot.pdf	0	0	NA	NA	NA	98.052	0	Inf	up	4.0654e-23	4.95325e-22	yes	GO:0044260(cellular macromolecule metabolic process);GO:0006470(protein dephosphorylation);GO:1901564(organonitrogen compound metabolic process);GO:0006807(nitrogen compound metabolic process);GO:0008152(metabolic process);GO:0006796(phosphate-containing compound metabolic process);GO:0016787(hydrolase activity);GO:0009987(cellular process);GO:0044237(cellular metabolic process);GO:0044238(primar…	NA
PC-3p-12725_949	XM_016100475.2	589	610	601	-39.4	-27.6	0.700508	7.5	1-8,610-603;10-12,601-599;13-20,597-590	9-9,602-602[SIL];x-x,598-598[BULt];21-21,589-589[UP3]	.((((((((.(((.((((((((&)))))))).)))-)))))))).	UAGAGGUCACAGUGGAUGGGGA&UUCCCGUCGACU-UGAUCUCUC	1	32.684	4	0.86119	Output/R8h/cleaveLand_result/t_plot/PC-3p-12725_949_XM_016100475.2_601_TPlot.pdf	0	0	NA	NA	NA	32.684	0	Inf	up	1.084e-08	1.2485e-08	yes	GO:0044042(glucan metabolic process);GO:0008270(zinc ion binding);GO:0016740(transferase activity);GO:0033692(cellular polysaccharide biosynthetic process);GO:0071554(cell wall organization or biogenesis);GO:0043170(macromolecule metabolic process);GO:0000271(polysaccharide biosynthetic process);GO:0046914(transition metal ion binding);GO:0044464(cell part);GO:0031224(intrinsic component of membr…	NA
PC-3p-12725_949	XM_016100476.1	137	158	149	-39.4	-27.6	0.700508	7.5	1-8,158-151;10-12,149-147;13-20,145-138	9-9,150-150[SIL];x-x,146-146[BULt];21-21,137-137[UP3]	.((((((((.(((.((((((((&)))))))).)))-)))))))).	UAGAGGUCACAGUGGAUGGGGA&UUCCCGUCGACU-UGAUCUCUC	2	65.368	2	0.490142	Output/R8h/cleaveLand_result/t_plot/PC-3p-12725_949_XM_016100476.1_149_TPlot.pdf	2	79.2048	2	0.393375	Output/R0h/cleaveLand_result/t_plot/PC-3p-12725_949_XM_016100476.1_149_TPlot.pdf	65.368	79.2048	-0.277003	down	0.24981	0.262584	yes	GO:0044042(glucan metabolic process);GO:0008270(zinc ion binding);GO:0016740(transferase activity);GO:0033692(cellular polysaccharide biosynthetic process);GO:0071554(cell wall organization or biogenesis);GO:0043170(macromolecule metabolic process);GO:0000271(polysaccharide biosynthetic process);GO:0046914(transition metal ion binding);GO:0044464(cell part);GO:0031224(intrinsic component of membr…	NA
PC-3p-12725_949	XM_016101277.2	410	430	421	-39.4	-32.6	0.827411	3	1-3,430-428;5-21,426-410	4-4,427-427[SIL]	(((((((((((((((((.(((&))).)))))))))))))))))	GGGAGAUCAAGUCGACGAGAG&UUCCCGUCGACUUGAUCUCUC	1	32.684	4	0.0219427	Output/R8h/cleaveLand_result/t_plot/PC-3p-12725_949_XM_016101277.2_421_TPlot.pdf	0	0	NA	NA	NA	32.684	0	Inf	up	1.084e-08	1.2485e-08	yes	GO:0008233(peptidase activity);GO:0008236(serine-type peptidase activity);GO:0070011(peptidase activity, acting on L-amino acid peptides);GO:0044238(primary metabolic process);GO:0004175(endopeptidase activity);GO:0016787(hydrolase activity);GO:1901564(organonitrogen compound metabolic process);GO:0004252(serine-type endopeptidase activity);GO:0071704(organic substance metabolic process);GO:00038…	ko00330(Arginine and proline metabolism)
PC-3p-12725_949	XM_016102010.2	667	688	679	-39.4	-27.9	0.708122	6.5	1-10,688-679;11-11,677-677;13-19,675-669	x-x,678-678[BULt];12-12,676-676[SIL];20-21,668-667[UP3]	..(((((((.(.((((((((((&))))))))))-).)))))))..	UCGGGAUCACGUUCGACGGGAA&UUCCCGUCGA-CUUGAUCUCUC	1	32.684	4	0.729919	Output/R8h/cleaveLand_result/t_plot/PC-3p-12725_949_XM_016102010.2_679_TPlot.pdf	0	0	NA	NA	NA	32.684	0	Inf	up	1.084e-08	1.2485e-08	yes	NA	ko00500(Starch and sucrose metabolism);ko00940(Phenylpropanoid biosynthesis);ko00460(Cyanoamino acid metabolism);ko01100(Metabolic pathways);ko01110(Biosynthesis of secondary metabolites);ko04626(Plant-pathogen interaction);ko04016(MAPK signaling pathway - plant)
PC-3p-12725_949	XM_016102124.2	332	353	344	-39.4	-26	0.659898	7	1-3,353-351;4-9,349-344;11-15,343-339;17-21,336-332	x-x,350-350[BULt];10-10,x-x[BULq];16-16,338-337[AILt]	(((((..(((((-((((((.(((&)))-)))))).)))))-.)))))	GAGAGUCUCAAG-CGGCGGAGAA&UUC-CCGUCGACUUGA-UCUCUC	0	0	NA	NA	NA	1	39.6024	4	0.998892	Output/R0h/cleaveLand_result/t_plot/PC-3p-12725_949_XM_016102124.2_344_TPlot.pdf	0	39.6024	-Inf	down	3.1118e-10	6.0287e-10	yes	NA	NA
PC-3p-12725_949	XM_016103754.2	815	835	826	-39.4	-26.8	0.680203	5.5	1-10,835-826;12-19,825-818;20-21,816-815	11-11,x-x[BULq];x-x,817-817[BULt]	((.((((((((-((((((((((&)))))))))).))))))))-))	GAUGAGGUCGA-UUGACGGGAG&UUCCCGUCGACUUGAUCUC-UC	0	0	NA	NA	NA	2	79.2048	2	0.674331	Output/R0h/cleaveLand_result/t_plot/PC-3p-12725_949_XM_016103754.2_826_TPlot.pdf	0	79.2048	-Inf	down	5.5905e-19	3.89431e-18	yes	NA	NA
PC-3p-12725_949	XM_016104814.2	1706	1728	1718	-39.4	-26.9	0.682741	8.5	1-3,1728-1726;4-10,1724-1718;11-19,1716-1708	x-x,1725-1725[BULt];x-x,1717-1717[BULt];20-21,1707-1706[UP3]	..(((((((((.(((((((.(((&)))-)))))))-)))))))))..	CUGGGGUCGAGUUCGACGGCGGA&UUC-CCGUCGA-CUUGAUCUCUC	0	0	NA	NA	NA	1	39.6024	4	0.965459	Output/R0h/cleaveLand_result/t_plot/PC-3p-12725_949_XM_016104814.2_1718_TPlot.pdf	0	39.6024	-Inf	down	3.1118e-10	6.0287e-10	yes	GO:0010252(auxin homeostasis);GO:0048878(chemical homeostasis);GO:0060918(auxin transport);GO:0005886(plasma membrane);GO:0065007(biological regulation);GO:0048583(regulation of response to stimulus);GO:0031224(intrinsic component of membrane);GO:0022857(transmembrane transporter activity);GO:0044444(cytoplasmic part);GO:0005215(transporter activity);GO:0051179(localization);GO:0050794(regulation…	NA
PC-3p-12725_949	XM_016104966.2	105	126	116	-39.4	-26.2	0.664975	11	2-8,125-119;11-13,115-113;16-21,110-105	1-1,126-126[UP5];9-10,118-116[AILt];14-15,112-111[SIL]	((((((..(((...(((((((.&.)))))))-..)))..))))))	GAGAGGGAGAGGGAGGCGGGAG&UUCCCGUC-GACUUGAUCUCUC	0	0	NA	NA	NA	1	39.6024	4	0.995347	Output/R0h/cleaveLand_result/t_plot/PC-3p-12725_949_XM_016104966.2_116_TPlot.pdf	0	39.6024	-Inf	down	3.1118e-10	6.0287e-10	yes	GO:1901990(regulation of mitotic cell cycle phase transition);GO:0065007(biological regulation);GO:0050794(regulation of cellular process);GO:0043231(intracellular membrane-bounded organelle);GO:0051128(regulation of cellular component organization);GO:0044464(cell part);GO:0043229(intracellular organelle);GO:0044424(intracellular part);GO:0051783(regulation of nuclear division);GO:0043226(organe…	NA
PC-3p-12725_949	XM_016108390.2	1230	1248	1241	-39.4	-27.1	0.687817	8.5	3-6,1246-1243;8-9,1242-1241;11-21,1240-1230	1-2,1248-1247[UP5];7-7,x-x[BULq];10-10,x-x[BULq]	(((((((((((-((-((((..&..)))).)).)))))))))))	GAGAGGUCAGG-CG-CGGGCA&UUCCCGUCGACUUGAUCUCUC	4	130.736	2	0.624875	Output/R8h/cleaveLand_result/t_plot/PC-3p-12725_949_XM_016108390.2_1241_TPlot.pdf	0	0	NA	NA	NA	130.736	0	Inf	up	2.8161e-30	6.66857e-29	yes	GO:0048471(perinuclear region of cytoplasm);GO:0009816(defense response to bacterium, incompatible interaction);GO:0031348(negative regulation of defense response);GO:0065007(biological regulation);GO:0043227(membrane-bounded organelle);GO:0009605(response to external stimulus);GO:0043207(response to external biotic stimulus);GO:0045087(innate immune response);GO:0048519(negative regulation of bi…	ko00514(Other types of O-glycan biosynthesis)
PC-3p-12725_949	XM_016112267.2	1112	1134	1124	-39.4	-26.6	0.675127	7	2-3,1133-1132;4-6,1130-1128;8-15,1126-1119;16-21,1117-1112	1-1,1134-1134[UP5];x-x,1131-1131[BULt];7-7,1127-1127[SIL];x-x,1118-1118[BULt]	((((((.((((((((.(((.((.&.))-))).))))))))-))))))	GAGAGACUCAAGUUGUCGGAGAU&UUC-CCGUCGACUUGA-UCUCUC	1	32.684	4	0.996806	Output/R8h/cleaveLand_result/t_plot/PC-3p-12725_949_XM_016112267.2_1124_TPlot.pdf	1	39.6024	4	0.991463	Output/R0h/cleaveLand_result/t_plot/PC-3p-12725_949_XM_016112267.2_1124_TPlot.pdf	32.684	39.6024	-0.277003	down	0.4158	0.417305	yes	GO:0003824(catalytic activity);GO:0005488(binding);GO:0050662(coenzyme binding);GO:0048037(cofactor binding)	ko00040(Pentose and glucuronate interconversions);ko04120(Ubiquitin mediated proteolysis);ko01100(Metabolic pathways)
PC-3p-12725_949	XM_016112522.2	463	484	474	-39.4	-28.3	0.718274	5.5	1-8,484-477;9-13,475-471;16-21,468-463	x-x,476-476[BULt];14-15,470-469[SIL]	((((((..(((((.((((((((&))))))))-)))))..))))))	GAGAGGAGAAGUCAGGCGGGAA&UUCCCGUC-GACUUGAUCUCUC	0	0	NA	NA	NA	2	79.2048	2	0.158163	Output/R0h/cleaveLand_result/t_plot/PC-3p-12725_949_XM_016112522.2_474_TPlot.pdf	0	79.2048	-Inf	down	5.5905e-19	3.89431e-18	yes	GO:0019222(regulation of metabolic process);GO:0031323(regulation of cellular metabolic process);GO:0043226(organelle);GO:0044464(cell part);GO:0060255(regulation of macromolecule metabolic process);GO:0003677(DNA binding);GO:0043231(intracellular membrane-bounded organelle);GO:0003676(nucleic acid binding);GO:0005488(binding);GO:2000112(regulation of cellular macromolecule biosynthetic process);…	ko04016(MAPK signaling pathway - plant)
PC-3p-12725_949	XM_016112605.2	1789	1810	1801	-39.4	-29	0.736041	5.5	1-8,1810-1803;10-14,1801-1797;16-21,1794-1789	9-9,1802-1802[SIL];15-15,1796-1795[AILt]	((((((..(((((.((((((((&)))))))).)))))-.))))))	GAGAGACCCAAGUGGAUGGGAG&UUCCCGUCGACUUG-AUCUCUC	1	32.684	4	0.329255	Output/R8h/cleaveLand_result/t_plot/PC-3p-12725_949_XM_016112605.2_1801_TPlot.pdf	0	0	NA	NA	NA	32.684	0	Inf	up	1.084e-08	1.2485e-08	yes	GO:0043229(intracellular organelle);GO:0009987(cellular process);GO:0009056(catabolic process);GO:0044424(intracellular part);GO:0043231(intracellular membrane-bounded organelle);GO:0044237(cellular metabolic process);GO:0043226(organelle);GO:0044248(cellular catabolic process);GO:0006914(autophagy);GO:0005622(intracellular);GO:0005623(cell);GO:0044464(cell part);GO:0061919(process utilizing auto…	NA
PC-3p-12725_949	XM_016114539.2	781	802	792	-39.4	-25.9	0.65736	7.5	1-3,802-800;4-16,798-786;18-20,784-782	x-x,799-799[BULt];17-17,785-785[SIL];21-21,781-781[UP3]	.(((.(((((((((((((.(((&)))-))))))))))))).))).	UGGAAGUCGGGUCGGCGGUGAA&UUC-CCGUCGACUUGAUCUCUC	0	0	NA	NA	NA	1	39.6024	4	0.999287	Output/R0h/cleaveLand_result/t_plot/PC-3p-12725_949_XM_016114539.2_792_TPlot.pdf	0	39.6024	-Inf	down	3.1118e-10	6.0287e-10	yes	GO:0003824(catalytic activity);GO:0008152(metabolic process);GO:0055114(oxidation-reduction process);GO:0016491(oxidoreductase activity)	ko01100(Metabolic pathways);ko00740(Riboflavin metabolism);ko01110(Biosynthesis of secondary metabolites)
PC-3p-12725_949	XM_016116059.2	957	981	969	-39.4	-26.94	0.683756	10.5	1-9,981-973;11-15,968-964;16-21,962-957	10-10,972-969[AILt];x-x,963-963[BULt]	((((((.(((((....(((((((((&)))))))))---.)))))-))))))	GAGGGGCUCGAGAACGCGACGGGAA&UUCCCGUCG---ACUUGA-UCUCUC	2	65.368	3	0.324306	Output/R8h/cleaveLand_result/t_plot/PC-3p-12725_949_XM_016116059.2_969_TPlot.pdf	3	118.807	2	0.629957	Output/R0h/cleaveLand_result/t_plot/PC-3p-12725_949_XM_016116059.2_969_TPlot.pdf	65.368	118.807	-0.861965	down	8.22e-05	9.10902e-05	yes	GO:1901575(organic substance catabolic process);GO:0016787(hydrolase activity);GO:0071555(cell wall organization);GO:0016021(integral component of membrane);GO:0000272(polysaccharide catabolic process);GO:0010393(galacturonan metabolic process);GO:0045490(pectin catabolic process);GO:0016020(membrane);GO:0050790(regulation of catalytic activity);GO:0042545(cell wall modification);GO:0005976(polys…	ko00040(Pentose and glucuronate interconversions);ko01100(Metabolic pathways)
PC-3p-12725_949	XM_016117149.2	1434	1455	1445	-39.4	-25.8	0.654822	8	1-3,1455-1453;4-9,1451-1446;11-20,1444-1435	x-x,1452-1452[BULt];10-10,1445-1445[SIL];21-21,1434-1434[UP3]	.((((((((((.((((((.(((&)))-)))))).)))))))))).	CGGAGAUUAGGGCGGCGGUGAA&UUC-CCGUCGACUUGAUCUCUC	4	130.736	2	0.959378	Output/R8h/cleaveLand_result/t_plot/PC-3p-12725_949_XM_016117149.2_1445_TPlot.pdf	0	0	NA	NA	NA	130.736	0	Inf	up	2.8161e-30	6.66857e-29	yes	GO:0034357(photosynthetic membrane);GO:0031967(organelle envelope);GO:0071704(organic substance metabolic process);GO:0044281(small molecule metabolic process);GO:0005506(iron ion binding);GO:0044464(cell part);GO:0044283(small molecule biosynthetic process);GO:0046394(carboxylic acid biosynthetic process);GO:1901576(organic substance biosynthetic process);GO:0005622(intracellular);GO:0008152(met…	ko01100(Metabolic pathways);ko01110(Biosynthesis of secondary metabolites);ko00592(alpha-Linolenic acid metabolism)
PC-3p-12725_949	XM_021124859.1	892	915	904	-39.4	-25.8	0.654822	7	2-3,914-913;4-8,911-907;9-16,905-898;17-21,896-892	1-1,915-915[UP5];x-x,912-912[BULt];x-x,906-906[BULt];x-x,897-897[BULt]	(((((.((((((((.(((((.((.&.))-)))))-))))))))-)))))	GAGAGCAUUGAGUCAGACGGAGAU&UUC-CCGUC-GACUUGAU-CUCUC	1	32.684	4	0.999888	Output/R8h/cleaveLand_result/t_plot/PC-3p-12725_949_XM_021124859.1_904_TPlot.pdf	0	0	NA	NA	NA	32.684	0	Inf	up	1.084e-08	1.2485e-08	yes	NA	NA
PC-3p-12725_949	XM_021134825.1	629	650	641	-39.4	-26	0.659898	9.5	2-11,649-640;14-19,636-631	1-1,650-650[UP5];12-13,639-637[AILt];20-21,630-629[UP3]	..((((((...((((((((((.&.))))))))))-..))))))..	CCGGGAUCCAUGUCGAUGGGAU&UUCCCGUCGAC-UUGAUCUCUC	0	0	NA	NA	NA	2	79.2048	2	0.865331	Output/R0h/cleaveLand_result/t_plot/PC-3p-12725_949_XM_021134825.1_641_TPlot.pdf	0	79.2048	-Inf	down	5.5905e-19	3.89431e-18	yes	GO:0032787(monocarboxylic acid metabolic process);GO:0044422(organelle part);GO:0008152(metabolic process);GO:0006090(pyruvate metabolic process);GO:0009532(plastid stroma);GO:0043226(organelle);GO:0044237(cellular metabolic process);GO:0006732(coenzyme metabolic process);GO:0006082(organic acid metabolic process);GO:0009526(plastid envelope);GO:0055114(oxidation-reduction process);GO:0035384(thi…	ko00010(Glycolysis / Gluconeogenesis);ko01110(Biosynthesis of secondary metabolites);ko00620(Pyruvate metabolism);ko00020(Citrate cycle (TCA cycle));ko01100(Metabolic pathways);ko01200(Carbon metabolism)
PC-3p-12725_949	XM_021135928.1	1134	1154	1145	-39.4	-28	0.71066	9	4-9,1151-1146;11-21,1144-1134	1-3,1154-1152[UP5];10-10,1145-1145[SIL]	(((((((((((.((((((...&...)))))).)))))))))))	GAGGGAUCGAGACGGCGGUGC&UUCCCGUCGACUUGAUCUCUC	0	0	NA	NA	NA	1	39.6024	4	0.608573	Output/R0h/cleaveLand_result/t_plot/PC-3p-12725_949_XM_021135928.1_1145_TPlot.pdf	0	39.6024	-Inf	down	3.1118e-10	6.0287e-10	yes	NA	NA
PC-3p-12911_938	BGI_novel_T001351	1396	1406	1397	-28.7	-19.4	0.675958	3	12-21,1405-1396	11-11,1406-1406[SIL]	((((((((((.&.))))))))))	GCUGAGCUGCG&UUUUUAAUUAA	0	0	NA	NA	NA	1	39.6024	4	0.999998	Output/R0h/cleaveLand_result/t_plot/PC-3p-12911_938_BGI_novel_T001351_1397_TPlot.pdf	0	39.6024	-Inf	down	3.1118e-10	6.0287e-10	yes	NA	ko04070(Phosphatidylinositol signaling system);ko01100(Metabolic pathways);ko01110(Biosynthesis of secondary metabolites);ko00564(Glycerophospholipid metabolism);ko00561(Glycerolipid metabolism)
PC-3p-12911_938	BGI_novel_T002206	1008	1028	1019	-28.7	-18.9	0.658537	17.5	9-21,1020-1008	1-8,1028-1021[UP5]	(((((((((((((........&........)))))))))))))	GUUGGGCUGCUUGCUCCGGAU&UUUUUAAUUAAGUAGCUCAGC	1	32.684	4	1	Output/R8h/cleaveLand_result/t_plot/PC-3p-12911_938_BGI_novel_T002206_1019_TPlot.pdf	0	0	NA	NA	NA	32.684	0	Inf	up	1.084e-08	1.2485e-08	yes	GO:0019438(aromatic compound biosynthetic process);GO:1901137(carbohydrate derivative biosynthetic process);GO:0009265(2'-deoxyribonucleotide biosynthetic process);GO:0044249(cellular biosynthetic process);GO:0009211(pyrimidine deoxyribonucleoside triphosphate metabolic process);GO:0009139(pyrimidine nucleoside diphosphate biosynthetic process);GO:0097159(organic cyclic compound binding);GO:00181…	ko00240(Pyrimidine metabolism);ko01100(Metabolic pathways)
PC-3p-12911_938	BGI_novel_T002252	1249	1269	1260	-28.7	-19.6	0.682927	7.5	2-12,1268-1258;14-21,1256-1249	1-1,1269-1269[UP5];13-13,1257-1257[SIL]	((((((((.(((((((((((.&.))))))))))).))))))))	GUUGAGCUUUUUAGUUGGAGC&UUUUUAAUUAAGUAGCUCAGC	1	32.684	4	0.999994	Output/R8h/cleaveLand_result/t_plot/PC-3p-12911_938_BGI_novel_T002252_1260_TPlot.pdf	0	0	NA	NA	NA	32.684	0	Inf	up	1.084e-08	1.2485e-08	yes	GO:0097159(organic cyclic compound binding);GO:1901265(nucleoside phosphate binding);GO:0005488(binding);GO:0000166(nucleotide binding);GO:1901363(heterocyclic compound binding);GO:0036094(small molecule binding)	ko03040(Spliceosome);ko04144(Endocytosis);ko04141(Protein processing in endoplasmic reticulum)
PC-3p-12911_938	BGI_novel_T004127	1589	1610	1600	-28.7	-18.7	0.651568	13	2-9,1609-1602;14-21,1596-1589	1-1,1610-1610[UP5];10-13,1601-1597[AILt]	((((((((.....((((((((.&.))))))))-....))))))))	GCUGAGCUUGGAGAGUUGAAGC&UUUUUAAUU-AAGUAGCUCAGC	1	32.684	4	1	Output/R8h/cleaveLand_result/t_plot/PC-3p-12911_938_BGI_novel_T004127_1600_TPlot.pdf	0	0	NA	NA	NA	32.684	0	Inf	up	1.084e-08	1.2485e-08	yes	GO:0003723(RNA binding);GO:0097159(organic cyclic compound binding);GO:0003676(nucleic acid binding);GO:1901265(nucleoside phosphate binding);GO:0000166(nucleotide binding);GO:0005488(binding);GO:0036094(small molecule binding);GO:1901363(heterocyclic compound binding)	ko03013(RNA transport);ko03040(Spliceosome);ko03015(mRNA surveillance pathway)
PC-3p-12911_938	BGI_novel_T006663	949	960	951	-28.7	-19.5	0.679443	4	11-21,959-949	10-10,960-960[SIL]	(((((((((((.&.)))))))))))	GCUGGGCUGCUC&UUUUUAAUUAAG	1	32.684	4	0.999998	Output/R8h/cleaveLand_result/t_plot/PC-3p-12911_938_BGI_novel_T006663_951_TPlot.pdf	0	0	NA	NA	NA	32.684	0	Inf	up	1.084e-08	1.2485e-08	yes	GO:0031365(N-terminal protein amino acid modification);GO:0004596(peptide alpha-N-acetyltransferase activity);GO:0043543(protein acylation);GO:0044424(intracellular part);GO:0031248(protein acetyltransferase complex);GO:0006464(cellular protein modification process);GO:0003824(catalytic activity);GO:0032991(macromolecular complex);GO:0016410(N-acyltransferase activity);GO:0016407(acetyltransferas…	NA
PC-3p-12911_938	BGI_novel_T007390	1160	1180	1171	-28.7	-19.5	0.679443	6.5	1-6,1180-1175;8-9,1173-1172;11-21,1170-1160	7-7,1174-1174[SIL];10-10,1171-1171[SIL]	(((((((((((.((.((((((&)))))).)).)))))))))))	GCUGAGUUACUCAAAUGGAAA&UUUUUAAUUAAGUAGCUCAGC	0	0	NA	NA	NA	1	39.6024	4	0.999986	Output/R0h/cleaveLand_result/t_plot/PC-3p-12911_938_BGI_novel_T007390_1171_TPlot.pdf	0	39.6024	-Inf	down	3.1118e-10	6.0287e-10	yes	GO:0005622(intracellular);GO:0007154(cell communication);GO:0044464(cell part);GO:0051345(positive regulation of hydrolase activity);GO:0043085(positive regulation of catalytic activity);GO:0050896(response to stimulus);GO:0065007(biological regulation);GO:0050794(regulation of cellular process);GO:0005623(cell);GO:0007264(small GTPase mediated signal transduction);GO:0065009(regulation of molecu…	NA
PC-3p-12911_938	BGI_novel_T007391	1120	1140	1131	-28.7	-19.5	0.679443	6.5	1-6,1140-1135;8-9,1133-1132;11-21,1130-1120	7-7,1134-1134[SIL];10-10,1131-1131[SIL]	(((((((((((.((.((((((&)))))).)).)))))))))))	GCUGAGUUACUCAAAUGGAAA&UUUUUAAUUAAGUAGCUCAGC	0	0	NA	NA	NA	1	39.6024	4	0.99999	Output/R0h/cleaveLand_result/t_plot/PC-3p-12911_938_BGI_novel_T007391_1131_TPlot.pdf	0	39.6024	-Inf	down	3.1118e-10	6.0287e-10	yes	GO:0005622(intracellular);GO:0007154(cell communication);GO:0044464(cell part);GO:0051345(positive regulation of hydrolase activity);GO:0043085(positive regulation of catalytic activity);GO:0050896(response to stimulus);GO:0065007(biological regulation);GO:0050794(regulation of cellular process);GO:0005623(cell);GO:0007264(small GTPase mediated signal transduction);GO:0065009(regulation of molecu…	NA
PC-3p-12911_938	BGI_novel_T007598	601	621	612	-28.7	-18.94	0.65993	15	1-6,621-616;12-21,610-601	7-11,615-611[SIL]	((((((((((.....((((((&)))))).....))))))))))	GCUGAGCUAUGUCAGUGGGGA&UUUUUAAUUAAGUAGCUCAGC	1	32.684	4	1	Output/R8h/cleaveLand_result/t_plot/PC-3p-12911_938_BGI_novel_T007598_612_TPlot.pdf	0	0	NA	NA	NA	32.684	0	Inf	up	1.084e-08	1.2485e-08	yes	GO:0044085(cellular component biogenesis);GO:0071704(organic substance metabolic process);GO:0019538(protein metabolic process);GO:0010556(regulation of macromolecule biosynthetic process);GO:0097159(organic cyclic compound binding);GO:0043170(macromolecule metabolic process);GO:0044260(cellular macromolecule metabolic process);GO:0034645(cellular macromolecule biosynthetic process);GO:0044237(ce…	ko03013(RNA transport)
PC-3p-12911_938	BGI_novel_T008262	1688	1708	1699	-28.7	-19.7	0.686411	10	5-18,1704-1691	1-4,1708-1705[UP5];19-21,1690-1688[UP3]	...((((((((((((((....&....))))))))))))))...	UUCGAGCUACUUAAUUAUUGA&UUUUUAAUUAAGUAGCUCAGC	1	32.684	4	0.999986	Output/R8h/cleaveLand_result/t_plot/PC-3p-12911_938_BGI_novel_T008262_1699_TPlot.pdf	0	0	NA	NA	NA	32.684	0	Inf	up	1.084e-08	1.2485e-08	yes	GO:0035639(purine ribonucleoside triphosphate binding);GO:0016462(pyrophosphatase activity);GO:0016818(hydrolase activity, acting on acid anhydrides, in phosphorus-containing anhydrides);GO:0005515(protein binding);GO:0097367(carbohydrate derivative binding);GO:0032555(purine ribonucleotide binding);GO:0016787(hydrolase activity);GO:0032559(adenyl ribonucleotide binding);GO:0006928(movement of ce…	ko00260(Glycine, serine and threonine metabolism);ko01100(Metabolic pathways)
PC-3p-12911_938	BGI_novel_T011351	702	727	718	-28.7	-20.3	0.707317	7	1-12,727-716;13-17,714-710;18-21,705-702	x-x,715-715[BULt];x-x,709-706[BULt]	((((....(((((.((((((((((((&))))))))))))-)))))----))))	GCUGGAACAGCUAUCUUAAUUAAGAA&UUUUUAAUUAAG-UAGCU----CAGC	0	0	NA	NA	NA	1	39.6024	4	0.996658	Output/R0h/cleaveLand_result/t_plot/PC-3p-12911_938_BGI_novel_T011351_718_TPlot.pdf	0	39.6024	-Inf	down	3.1118e-10	6.0287e-10	yes	GO:0005737(cytoplasm);GO:0043229(intracellular organelle);GO:0016020(membrane);GO:0005777(peroxisome);GO:0006996(organelle organization);GO:0044464(cell part);GO:0043231(intracellular membrane-bounded organelle);GO:0016043(cellular component organization);GO:0071840(cellular component organization or biogenesis);GO:0043226(organelle);GO:0005623(cell);GO:0044444(cytoplasmic part);GO:0044424(intrac…	ko04146(Peroxisome)
PC-3p-12911_938	BGI_novel_T012313	1060	1079	1071	-28.7	-19.8	0.689895	9	1-7,1079-1073;10-21,1071-1060	8-9,1072-1072[AILq]	((((((((((((.-(((((((&)))))))..))))))))))))	GCUGAGUUGCUUC-UUGGGGA&UUUUUAAUUAAGUAGCUCAGC	2	65.368	2	0.959681	Output/R8h/cleaveLand_result/t_plot/PC-3p-12911_938_BGI_novel_T012313_1071_TPlot.pdf	0	0	NA	NA	NA	65.368	0	Inf	up	6.2072e-16	2.71719e-15	yes	GO:0005694(chromosome);GO:0000280(nuclear division);GO:0000228(nuclear chromosome);GO:0051321(meiotic cell cycle);GO:0031981(nuclear lumen);GO:0070013(intracellular organelle lumen);GO:0005623(cell);GO:0031974(membrane-enclosed lumen);GO:0009987(cellular process);GO:0044424(intracellular part);GO:0043227(membrane-bounded organelle);GO:0030983(mismatched DNA binding);GO:0022402(cell cycle process)…	ko03430(Mismatch repair)
PC-3p-12911_938	BGI_novel_T012479	841	864	855	-28.7	-19.9	0.69338	9	3-16,862-849;17-21,845-841	1-2,864-863[UP5];x-x,848-846[BULt]	(((((...((((((((((((((..&..))))))))))))))---)))))	GCUGAUCGGUUGCUUAAUUGGAUC&UUUUUAAUUAAGUAGC---UCAGC	0	0	NA	NA	NA	1	39.6024	4	0.999418	Output/R0h/cleaveLand_result/t_plot/PC-3p-12911_938_BGI_novel_T012479_855_TPlot.pdf	0	39.6024	-Inf	down	3.1118e-10	6.0287e-10	yes	GO:0050794(regulation of cellular process);GO:0016972(thiol oxidase activity);GO:0065008(regulation of biological quality);GO:0042592(homeostatic process);GO:0055114(oxidation-reduction process);GO:0031224(intrinsic component of membrane);GO:0016020(membrane);GO:0016021(integral component of membrane);GO:0009987(cellular process);GO:0065007(biological regulation);GO:0050789(regulation of biologic…	NA
PC-3p-12911_938	XM_016076656.2	820	840	831	-28.7	-20.2	0.703833	7	2-5,839-836;8-13,833-828;15-21,826-820	1-1,840-840[UP5];6-7,835-834[SIL];14-14,827-827[SIL]	(((((((.((((((..((((.&.))))..)))))).)))))))	GCUGAGCAACUUAAGAAGAAG&UUUUUAAUUAAGUAGCUCAGC	0	0	NA	NA	NA	2	79.2048	2	0.838242	Output/R0h/cleaveLand_result/t_plot/PC-3p-12911_938_XM_016076656.2_831_TPlot.pdf	0	79.2048	-Inf	down	5.5905e-19	3.89431e-18	yes	GO:0046872(metal ion binding);GO:0051234(establishment of localization);GO:0006811(ion transport);GO:0005488(binding);GO:0030001(metal ion transport);GO:0051179(localization);GO:0006810(transport);GO:0043169(cation binding);GO:0043167(ion binding);GO:0006812(cation transport)	NA
PC-3p-12911_938	XM_016079084.2	753	775	765	-28.7	-20.1	0.700348	11.5	1-8,775-768;11-16,764-759;17-21,757-753	9-10,767-765[AILt];x-x,758-758[BULt]	(((((.((((((...((((((((&))))))))-..))))))-)))))	GCUGGUGCUACUGCUGUUGAGGA&UUUUUAAU-UAAGUAGC-UCAGC	0	0	NA	NA	NA	1	39.6024	4	0.998716	Output/R0h/cleaveLand_result/t_plot/PC-3p-12911_938_XM_016079084.2_765_TPlot.pdf	0	39.6024	-Inf	down	3.1118e-10	6.0287e-10	yes	GO:0016684(oxidoreductase activity, acting on peroxide as acceptor);GO:0003824(catalytic activity);GO:1901363(heterocyclic compound binding);GO:0016491(oxidoreductase activity);GO:0042221(response to chemical);GO:0009636(response to toxic substance);GO:1990748(cellular detoxification);GO:0098754(detoxification);GO:0004601(peroxidase activity);GO:0050896(response to stimulus);GO:0046906(tetrapyrro…	ko00053(Ascorbate and aldarate metabolism);ko00480(Glutathione metabolism)
PC-3p-12911_938	XM_016079933.2	608	629	620	-28.7	-18.9	0.658537	8	2-18,628-612;19-21,610-608	1-1,629-629[UP5];x-x,611-611[BULt]	(((.(((((((((((((((((.&.)))))))))))))))))-)))	GUUGGGGUUGCUUGGUUAAGGG&UUUUUAAUUAAGUAGCUC-AGC	0	0	NA	NA	NA	1	39.6024	4	1	Output/R0h/cleaveLand_result/t_plot/PC-3p-12911_938_XM_016079933.2_620_TPlot.pdf	0	39.6024	-Inf	down	3.1118e-10	6.0287e-10	yes	GO:0003676(nucleic acid binding);GO:0005488(binding);GO:0097159(organic cyclic compound binding);GO:1901363(heterocyclic compound binding);GO:0003723(RNA binding)	NA
PC-3p-12911_938	XM_016081194.2	3907	3928	3918	-28.7	-21.9	0.763066	9	3-8,3926-3921;10-21,3918-3907	1-2,3928-3927[UP5];9-9,3920-3919[AILt]	((((((((((((..((((((..&..))))))-.))))))))))))	GCUGGGCUGCUUCCAUUAGAUU&UUUUUAAU-UAAGUAGCUCAGC	0	0	NA	NA	NA	1	39.6024	4	0.444852	Output/R0h/cleaveLand_result/t_plot/PC-3p-12911_938_XM_016081194.2_3918_TPlot.pdf	0	39.6024	-Inf	down	3.1118e-10	6.0287e-10	yes	GO:0006189('de novo' IMP biosynthetic process);GO:0006753(nucleoside phosphate metabolic process);GO:0016879(ligase activity, forming carbon-nitrogen bonds);GO:0009167(purine ribonucleoside monophosphate metabolic process);GO:0009161(ribonucleoside monophosphate metabolic process);GO:1901137(carbohydrate derivative biosynthetic process);GO:0006793(phosphorus metabolic process);GO:0009126(purine n…	ko01110(Biosynthesis of secondary metabolites);ko01100(Metabolic pathways);ko00230(Purine metabolism)
PC-3p-12911_938	XM_016082824.2	714	739	730	-28.7	-20.3	0.707317	7	1-12,739-728;13-17,726-722;18-21,717-714	x-x,727-727[BULt];x-x,721-718[BULt]	((((....(((((.((((((((((((&))))))))))))-)))))----))))	GCUGGAACAGCUAUCUUAAUUAAGAA&UUUUUAAUUAAG-UAGCU----CAGC	0	0	NA	NA	NA	1	39.6024	4	0.995833	Output/R0h/cleaveLand_result/t_plot/PC-3p-12911_938_XM_016082824.2_730_TPlot.pdf	0	39.6024	-Inf	down	3.1118e-10	6.0287e-10	yes	GO:0005737(cytoplasm);GO:0043229(intracellular organelle);GO:0016020(membrane);GO:0005777(peroxisome);GO:0006996(organelle organization);GO:0044464(cell part);GO:0043231(intracellular membrane-bounded organelle);GO:0016043(cellular component organization);GO:0071840(cellular component organization or biogenesis);GO:0043226(organelle);GO:0005623(cell);GO:0044444(cytoplasmic part);GO:0044424(intrac…	ko04146(Peroxisome)
PC-3p-12911_938	XM_016083411.2	2109	2119	2110	-28.7	-19.3	0.672474	2	12-21,2118-2109	11-11,2119-2119[SIL]	((((((((((.&.))))))))))	GCUGAGCUACA&UUUUUAAUUAA	0	0	NA	NA	NA	1	39.6024	4	0.999999	Output/R0h/cleaveLand_result/t_plot/PC-3p-12911_938_XM_016083411.2_2110_TPlot.pdf	0	39.6024	-Inf	down	3.1118e-10	6.0287e-10	yes	GO:0043933(macromolecular complex subunit organization);GO:0071840(cellular component organization or biogenesis);GO:0005819(spindle);GO:0005737(cytoplasm);GO:0097435(supramolecular fiber organization);GO:0007010(cytoskeleton organization);GO:0099081(supramolecular polymer);GO:0065003(macromolecular complex assembly);GO:0000922(spindle pole);GO:0044430(cytoskeletal part);GO:0005815(microtubule or…	NA
PC-3p-12911_938	XM_016085137.2	551	571	562	-28.7	-18.7	0.651568	13.5	7-19,565-553	1-6,571-566[UP5];20-21,552-551[UP3]	..(((((((((((((......&......)))))))))))))..	UGUGAGCUGCUUAAUGAAGUA&UUUUUAAUUAAGUAGCUCAGC	1	32.684	4	1	Output/R8h/cleaveLand_result/t_plot/PC-3p-12911_938_XM_016085137.2_562_TPlot.pdf	0	0	NA	NA	NA	32.684	0	Inf	up	1.084e-08	1.2485e-08	yes	GO:0044281(small molecule metabolic process);GO:0046174(polyol catabolic process);GO:0005737(cytoplasm);GO:0016491(oxidoreductase activity);GO:0044424(intracellular part);GO:0005622(intracellular);GO:0044248(cellular catabolic process);GO:0046164(alcohol catabolic process);GO:0044237(cellular metabolic process);GO:0044464(cell part);GO:0046872(metal ion binding);GO:0006066(alcohol metabolic proce…	ko00562(Inositol phosphate metabolism);ko00053(Ascorbate and aldarate metabolism)
PC-3p-12911_938	XM_016086230.2	841	864	855	-28.7	-19.9	0.69338	9	3-16,862-849;17-21,845-841	1-2,864-863[UP5];x-x,848-846[BULt]	(((((...((((((((((((((..&..))))))))))))))---)))))	GCUGAUCGGUUGCUUAAUUGGAUC&UUUUUAAUUAAGUAGC---UCAGC	0	0	NA	NA	NA	1	39.6024	4	0.999362	Output/R0h/cleaveLand_result/t_plot/PC-3p-12911_938_XM_016086230.2_855_TPlot.pdf	0	39.6024	-Inf	down	3.1118e-10	6.0287e-10	yes	GO:0050794(regulation of cellular process);GO:0016972(thiol oxidase activity);GO:0065008(regulation of biological quality);GO:0042592(homeostatic process);GO:0055114(oxidation-reduction process);GO:0031224(intrinsic component of membrane);GO:0016020(membrane);GO:0016021(integral component of membrane);GO:0009987(cellular process);GO:0065007(biological regulation);GO:0050789(regulation of biologic…	NA
PC-3p-12911_938	XM_016086461.2	3691	3712	3702	-28.7	-18.9	0.658537	10.5	1-6,3712-3707;9-21,3703-3691	7-8,3706-3704[AILt]	(((((((((((((...((((((&))))))-..)))))))))))))	GUUGAGCUAUUUAUUGUGAGGA&UUUUUA-AUUAAGUAGCUCAGC	0	0	NA	NA	NA	1	39.6024	4	1	Output/R0h/cleaveLand_result/t_plot/PC-3p-12911_938_XM_016086461.2_3702_TPlot.pdf	0	39.6024	-Inf	down	3.1118e-10	6.0287e-10	yes	GO:0071704(organic substance metabolic process);GO:0044389(ubiquitin-like protein ligase binding);GO:0019538(protein metabolic process);GO:0005622(intracellular);GO:0003824(catalytic activity);GO:0016740(transferase activity);GO:0044424(intracellular part);GO:0036211(protein modification process);GO:0019899(enzyme binding);GO:0031625(ubiquitin protein ligase binding);GO:0070647(protein modificati…	ko04120(Ubiquitin mediated proteolysis)
PC-3p-12911_938	XM_016086511.1	815	837	828	-28.7	-21.3	0.74216	10	4-16,834-822;17-21,819-815	1-3,837-835[UP5];x-x,821-820[BULt]	(((((..(((((((((((((...&...)))))))))))))--)))))	GCUGAUAGCUACUUGGUUAGCUC&UUUUUAAUUAAGUAGC--UCAGC	5	163.42	2	0.385229	Output/R8h/cleaveLand_result/t_plot/PC-3p-12911_938_XM_016086511.1_828_TPlot.pdf	3	118.807	3	0.0875919	Output/R0h/cleaveLand_result/t_plot/PC-3p-12911_938_XM_016086511.1_828_TPlot.pdf	163.42	118.807	0.459963	up	0.0079126	0.00867322	yes	GO:0043167(ion binding);GO:0008270(zinc ion binding);GO:0052747(sinapyl alcohol dehydrogenase activity);GO:0008152(metabolic process);GO:0016616(oxidoreductase activity, acting on the CH-OH group of donors, NAD or NADP as acceptor);GO:0043169(cation binding);GO:0016614(oxidoreductase activity, acting on CH-OH group of donors);GO:0046914(transition metal ion binding);GO:0016491(oxidoreductase acti…	ko01100(Metabolic pathways);ko00940(Phenylpropanoid biosynthesis);ko01110(Biosynthesis of secondary metabolites)
PC-3p-12911_938	XM_016086958.2	559	579	570	-28.7	-19.7	0.686411	17	9-21,571-559	1-8,579-572[UP5]	(((((((((((((........&........)))))))))))))	GUUGAGCUGCUUGUGGACCAA&UUUUUAAUUAAGUAGCUCAGC	1	32.684	4	0.99999	Output/R8h/cleaveLand_result/t_plot/PC-3p-12911_938_XM_016086958.2_570_TPlot.pdf	0	0	NA	NA	NA	32.684	0	Inf	up	1.084e-08	1.2485e-08	yes	GO:0070085(glycosylation);GO:0006807(nitrogen compound metabolic process);GO:0043412(macromolecule modification);GO:0005623(cell);GO:0044446(intracellular organelle part);GO:0016020(membrane);GO:0016758(transferase activity, transferring hexosyl groups);GO:0032580(Golgi cisterna membrane);GO:1901566(organonitrogen compound biosynthetic process);GO:0044422(organelle part);GO:0043231(intracellular …	ko01100(Metabolic pathways)
PC-3p-12911_938	XM_016088695.2	1039	1059	1050	-28.7	-19.6	0.682927	16.5	9-21,1051-1039	1-8,1059-1052[UP5]	(((((((((((((........&........)))))))))))))	GCUGAGUUACUUGCAGAUGAG&UUUUUAAUUAAGUAGCUCAGC	0	0	NA	NA	NA	2	79.2048	2	0.953894	Output/R0h/cleaveLand_result/t_plot/PC-3p-12911_938_XM_016088695.2_1050_TPlot.pdf	0	79.2048	-Inf	down	5.5905e-19	3.89431e-18	yes	GO:0032301(MutSalpha complex);GO:0043234(protein complex);GO:1990391(DNA repair complex);GO:0006139(nucleobase-containing compound metabolic process);GO:0007127(meiosis I);GO:0005694(chromosome);GO:0006310(DNA recombination);GO:0019219(regulation of nucleobase-containing compound metabolic process);GO:0043228(non-membrane-bounded organelle);GO:0006725(cellular aromatic compound metabolic process)…	ko03430(Mismatch repair)
PC-3p-12911_938	XM_016090522.2	2043	2064	2055	-28.7	-21.9	0.763066	7	1-3,2064-2062;6-19,2059-2046;20-21,2044-2043	4-5,2061-2060[SIL];x-x,2045-2045[BULt]	((.((((((((((((((..(((&)))..))))))))))))))-))	GCUUGAGCUACUUGAUUUUGAA&UUUUUAAUUAAGUAGCUCA-GC	1	32.684	4	0.559973	Output/R8h/cleaveLand_result/t_plot/PC-3p-12911_938_XM_016090522.2_2055_TPlot.pdf	0	0	NA	NA	NA	32.684	0	Inf	up	1.084e-08	1.2485e-08	yes	GO:0055114(oxidation-reduction process);GO:0044464(cell part);GO:0043231(intracellular membrane-bounded organelle);GO:0043227(membrane-bounded organelle);GO:0016628(oxidoreductase activity, acting on the CH-CH group of donors, NAD or NADP as acceptor);GO:0008152(metabolic process);GO:0005488(binding);GO:0043229(intracellular organelle);GO:0003677(DNA binding);GO:0003824(catalytic activity);GO:009…	NA
PC-3p-12911_938	XM_016095046.2	1310	1329	1320	-28.7	-20.4	0.710801	6	1-12,1329-1318;15-21,1316-1310	13-14,1317-1317[AILq]	(((((((.-((((((((((((&))))))))))))..)))))))	GCUGAGCC-UUUGAUUGAAGA&UUUUUAAUUAAGUAGCUCAGC	0	0	NA	NA	NA	3	118.807	2	0.775522	Output/R0h/cleaveLand_result/t_plot/PC-3p-12911_938_XM_016095046.2_1320_TPlot.pdf	0	118.807	-Inf	down	1.1501e-27	2.01922e-26	yes	GO:0008168(methyltransferase activity);GO:0003824(catalytic activity);GO:0016741(transferase activity, transferring one-carbon groups);GO:0008152(metabolic process);GO:0016740(transferase activity);GO:0032259(methylation);GO:0016021(integral component of membrane);GO:0044425(membrane part);GO:0031224(intrinsic component of membrane);GO:0016020(membrane)	NA
PC-3p-12911_938	XM_016096457.2	1794	1819	1810	-28.7	-18.8	0.655052	12	2-13,1818-1807;14-21,1801-1794	1-1,1819-1819[UP5];x-x,1806-1802[BULt]	((((((((.....((((((((((((.&.))))))))))))-----))))))))	GUUGGGCUUCAGUACUUGGUUGAGGC&UUUUUAAUUAAGU-----AGCUCAGC	3	98.052	3	0.913572	Output/R8h/cleaveLand_result/t_plot/PC-3p-12911_938_XM_016096457.2_1810_TPlot.pdf	0	0	NA	NA	NA	98.052	0	Inf	up	4.0654e-23	4.95325e-22	yes	GO:0016830(carbon-carbon lyase activity);GO:0009445(putrescine metabolic process);GO:0009056(catabolic process);GO:0003824(catalytic activity);GO:0044237(cellular metabolic process);GO:0006596(polyamine biosynthetic process);GO:0006595(polyamine metabolic process);GO:0006525(arginine metabolic process);GO:0044281(small molecule metabolic process);GO:0044249(cellular biosynthetic process);GO:19015…	ko01100(Metabolic pathways);ko00330(Arginine and proline metabolism)
PC-3p-12911_938	XM_016097338.2	895	920	907	-28.7	-19.66	0.685017	15.5	1-6,920-915;9-14,908-903;15-21,901-895	7-8,914-909[AILt];x-x,902-902[BULt]	(((((((.((((((......((((((&))))))----..))))))-)))))))	GCUGAGCUUGCUUAUGUGGGUGAAGA&UUUUUA----AUUAAGUA-GCUCAGC	0	0	NA	NA	NA	1	39.6024	4	0.99994	Output/R0h/cleaveLand_result/t_plot/PC-3p-12911_938_XM_016097338.2_907_TPlot.pdf	0	39.6024	-Inf	down	3.1118e-10	6.0287e-10	yes	GO:0005355(glucose transmembrane transporter activity);GO:0005215(transporter activity);GO:1904659(glucose transmembrane transport);GO:0015749(monosaccharide transport);GO:0005623(cell);GO:0055085(transmembrane transport);GO:0015144(carbohydrate transmembrane transporter activity);GO:0005402(cation:sugar symporter activity);GO:0015294(solute:cation symporter activity);GO:0015075(ion transmembrane…	NA
PC-3p-12911_938	XM_016101256.2	736	757	747	-28.7	-18.7	0.651568	13	2-9,756-749;14-21,743-736	1-1,757-757[UP5];10-13,748-744[AILt]	((((((((.....((((((((.&.))))))))-....))))))))	GCUGAGCUUGGAGAGUUGAAGC&UUUUUAAUU-AAGUAGCUCAGC	0	0	NA	NA	NA	1	39.6024	4	1	Output/R0h/cleaveLand_result/t_plot/PC-3p-12911_938_XM_016101256.2_747_TPlot.pdf	0	39.6024	-Inf	down	3.1118e-10	6.0287e-10	yes	GO:0003723(RNA binding);GO:0097159(organic cyclic compound binding);GO:0003676(nucleic acid binding);GO:1901265(nucleoside phosphate binding);GO:0000166(nucleotide binding);GO:0005488(binding);GO:0036094(small molecule binding);GO:1901363(heterocyclic compound binding)	ko03013(RNA transport);ko03040(Spliceosome);ko03015(mRNA surveillance pathway)
PC-3p-12911_938	XM_016102597.2	186	210	201	-28.7	-18.9	0.658537	8	2-17,209-194;18-20,189-187	1-1,210-210[UP5];x-x,193-190[BULt];21-21,186-186[UP3]	.(((....((((((((((((((((.&.))))))))))))))))----))).	CCUGUACUAGCUACUUAAUUAGGAC&UUUUUAAUUAAGUAGCU----CAGC	1	32.684	4	1	Output/R8h/cleaveLand_result/t_plot/PC-3p-12911_938_XM_016102597.2_201_TPlot.pdf	0	0	NA	NA	NA	32.684	0	Inf	up	1.084e-08	1.2485e-08	yes	NA	ko04122(Sulfur relay system)
PC-3p-12911_938	XM_016103522.2	1860	1880	1871	-28.7	-19.2	0.66899	16.5	9-21,1872-1860	1-8,1880-1873[UP5]	(((((((((((((........&........)))))))))))))	GCUGGGCUAUUUAUGGAAUUC&UUUUUAAUUAAGUAGCUCAGC	0	0	NA	NA	NA	1	39.6024	4	1	Output/R0h/cleaveLand_result/t_plot/PC-3p-12911_938_XM_016103522.2_1871_TPlot.pdf	0	39.6024	-Inf	down	3.1118e-10	6.0287e-10	yes	GO:1901565(organonitrogen compound catabolic process);GO:0044238(primary metabolic process);GO:0006508(proteolysis);GO:0019787(ubiquitin-like protein transferase activity);GO:0036211(protein modification process);GO:0005622(intracellular);GO:0009987(cellular process);GO:0019941(modification-dependent protein catabolic process);GO:0044248(cellular catabolic process);GO:0016740(transferase activity…	ko04120(Ubiquitin mediated proteolysis);ko04144(Endocytosis)
PC-3p-12911_938	XM_016103644.2	154	176	165	-28.7	-19.26	0.67108	14	1-6,176-171;10-21,165-154	7-9,170-166[AILt]	((((((((((((.....((((((&))))))--...))))))))))))	GCUGAGUUGCUUCUUUGUGGGAA&UUUUUA--AUUAAGUAGCUCAGC	0	0	NA	NA	NA	2	79.2048	2	0.987976	Output/R0h/cleaveLand_result/t_plot/PC-3p-12911_938_XM_016103644.2_165_TPlot.pdf	0	79.2048	-Inf	down	5.5905e-19	3.89431e-18	yes	GO:0004672(protein kinase activity);GO:0016772(transferase activity, transferring phosphorus-containing groups);GO:0050896(response to stimulus);GO:0005623(cell);GO:0043231(intracellular membrane-bounded organelle);GO:0043168(anion binding);GO:0032555(purine ribonucleotide binding);GO:0032553(ribonucleotide binding);GO:0006796(phosphate-containing compound metabolic process);GO:0019538(protein me…	NA
PC-3p-12911_938	XM_016103878.2	530	550	541	-28.7	-19	0.662021	13	6-11,545-540;14-21,537-530	1-5,550-546[UP5];12-13,539-538[SIL]	((((((((..((((((.....&.....))))))..))))))))	GCUGAGCUUAUUGAUUCCGUU&UUUUUAAUUAAGUAGCUCAGC	5	163.42	2	0.999127	Output/R8h/cleaveLand_result/t_plot/PC-3p-12911_938_XM_016103878.2_541_TPlot.pdf	3	118.807	2	0.994626	Output/R0h/cleaveLand_result/t_plot/PC-3p-12911_938_XM_016103878.2_541_TPlot.pdf	163.42	118.807	0.459963	up	0.0079126	0.00867322	yes	GO:0097367(carbohydrate derivative binding);GO:0005200(structural constituent of cytoskeleton);GO:0016817(hydrolase activity, acting on acid anhydrides);GO:0016462(pyrophosphatase activity);GO:0032553(ribonucleotide binding);GO:0001883(purine nucleoside binding);GO:0005737(cytoplasm);GO:0017111(nucleoside-triphosphatase activity);GO:0044464(cell part);GO:0005622(intracellular);GO:0005874(microtub…	ko04145(Phagosome)
PC-3p-12911_938	XM_016106384.2	213	235	225	-28.7	-21.5	0.749129	9.5	1-9,235-227;11-16,224-219;17-21,217-213	10-10,226-225[AILt];x-x,218-218[BULt]	(((((.((((((..(((((((((&)))))))))-.))))))-)))))	GCUGAGGCUGCUAGGAUUAGGGA&UUUUUAAUU-AAGUAGC-UCAGC	1	32.684	4	0.684541	Output/R8h/cleaveLand_result/t_plot/PC-3p-12911_938_XM_016106384.2_225_TPlot.pdf	0	0	NA	NA	NA	32.684	0	Inf	up	1.084e-08	1.2485e-08	yes	GO:0009987(cellular process);GO:0061919(process utilizing autophagic mechanism);GO:0006914(autophagy);GO:0008152(metabolic process);GO:0009056(catabolic process);GO:0044248(cellular catabolic process);GO:0044237(cellular metabolic process)	ko04136(Autophagy - other)
PC-3p-12911_938	XM_016106983.2	53	77	68	-28.7	-19.3	0.672474	11	1-10,77-68;11-19,64-56;20-21,54-53	x-x,67-65[BULt];x-x,55-55[BULt]	((.(((((((((...((((((((((&))))))))))---)))))))))-))	GUGUGAGCUGCUUUUUAGUUGAGAA&UUUUUAAUUA---AGUAGCUCA-GC	0	0	NA	NA	NA	1	39.6024	4	0.999999	Output/R0h/cleaveLand_result/t_plot/PC-3p-12911_938_XM_016106983.2_68_TPlot.pdf	0	39.6024	-Inf	down	3.1118e-10	6.0287e-10	yes	GO:0016491(oxidoreductase activity);GO:0055114(oxidation-reduction process);GO:0003824(catalytic activity);GO:0008152(metabolic process)	ko00750(Vitamin B6 metabolism);ko01100(Metabolic pathways)
PC-3p-12911_938	XM_016108132.2	1637	1658	1649	-28.7	-21.2	0.738676	12	5-18,1654-1641;19-21,1639-1637	1-4,1658-1655[UP5];x-x,1640-1640[BULt]	(((.((((((((((((((....&....))))))))))))))-)))	GCUAGGGCUGCUUGGUUGUCUG&UUUUUAAUUAAGUAGCUC-AGC	1	32.684	4	0.814781	Output/R8h/cleaveLand_result/t_plot/PC-3p-12911_938_XM_016108132.2_1649_TPlot.pdf	0	0	NA	NA	NA	32.684	0	Inf	up	1.084e-08	1.2485e-08	yes	GO:0005777(peroxisome);GO:0003997(acyl-CoA oxidase activity);GO:0016042(lipid catabolic process);GO:0009987(cellular process);GO:0050662(coenzyme binding);GO:1901575(organic substance catabolic process);GO:0072329(monocarboxylic acid catabolic process);GO:0044255(cellular lipid metabolic process);GO:0016627(oxidoreductase activity, acting on the CH-CH group of donors);GO:0019395(fatty acid oxidat…	ko00071(Fatty acid degradation);ko01110(Biosynthesis of secondary metabolites);ko01040(Biosynthesis of unsaturated fatty acids);ko01212(Fatty acid metabolism);ko00592(alpha-Linolenic acid metabolism);ko01100(Metabolic pathways);ko04146(Peroxisome)
PC-3p-12911_938	XM_016109009.2	1020	1040	1031	-28.7	-19.5	0.679443	7	3-12,1038-1029;14-17,1028-1025;18-21,1023-1020	1-2,1040-1039[UP5];13-13,x-x[BULq];x-x,1024-1024[BULt]	((((.((((-((((((((((..&..)))))))))).))))-))))	GCUGAAGCU-CUUAAUUGGACA&UUUUUAAUUAAGUAGCU-CAGC	1	32.684	4	0.999999	Output/R8h/cleaveLand_result/t_plot/PC-3p-12911_938_XM_016109009.2_1031_TPlot.pdf	0	0	NA	NA	NA	32.684	0	Inf	up	1.084e-08	1.2485e-08	yes	NA	ko04626(Plant-pathogen interaction)
PC-3p-12911_938	XM_016109458.2	2330	2354	2340	-28.7	-19.6	0.682927	12.5	1-8,2354-2347;9-16,2341-2334;18-21,2333-2330	x-x,2346-2342[BULt];17-17,x-x[BULq]	((((-((((((((.....((((((((&))))))))-----)))))))).))))	GCUG-GCUGCUUAGAGAAGUUAAAAA&UUUUUAAU-----UAAGUAGCUCAGC	0	0	NA	NA	NA	3	118.807	2	0.958281	Output/R0h/cleaveLand_result/t_plot/PC-3p-12911_938_XM_016109458.2_2340_TPlot.pdf	0	118.807	-Inf	down	1.1501e-27	2.01922e-26	yes	GO:0097159(organic cyclic compound binding);GO:0030554(adenyl nucleotide binding);GO:0036094(small molecule binding);GO:0005524(ATP binding);GO:0017076(purine nucleotide binding);GO:0032555(purine ribonucleotide binding);GO:1901363(heterocyclic compound binding);GO:0035639(purine ribonucleoside triphosphate binding);GO:1901265(nucleoside phosphate binding);GO:0003824(catalytic activity);GO:003255…	ko03440(Homologous recombination)
PC-3p-12911_938	XM_016112573.2	596	616	607	-28.7	-18.94	0.65993	15	1-6,616-611;12-21,605-596	7-11,610-606[SIL]	((((((((((.....((((((&)))))).....))))))))))	GCUGAGCUAUGUCAGUGGGGA&UUUUUAAUUAAGUAGCUCAGC	1	32.684	4	1	Output/R8h/cleaveLand_result/t_plot/PC-3p-12911_938_XM_016112573.2_607_TPlot.pdf	0	0	NA	NA	NA	32.684	0	Inf	up	1.084e-08	1.2485e-08	yes	GO:0044085(cellular component biogenesis);GO:0071704(organic substance metabolic process);GO:0019538(protein metabolic process);GO:0010556(regulation of macromolecule biosynthetic process);GO:0097159(organic cyclic compound binding);GO:0043170(macromolecule metabolic process);GO:0044260(cellular macromolecule metabolic process);GO:0034645(cellular macromolecule biosynthetic process);GO:0044237(ce…	ko03013(RNA transport)
PC-3p-12911_938	XM_016113512.1	874	894	885	-28.7	-19.1	0.665505	12	6-19,889-876	1-5,894-890[UP5];20-21,875-874[UP3]	..((((((((((((((.....&.....))))))))))))))..	UGUGAGCUACUUGAUUCCAUC&UUUUUAAUUAAGUAGCUCAGC	1	32.684	4	1	Output/R8h/cleaveLand_result/t_plot/PC-3p-12911_938_XM_016113512.1_885_TPlot.pdf	0	0	NA	NA	NA	32.684	0	Inf	up	1.084e-08	1.2485e-08	yes	GO:0043167(ion binding);GO:1901575(organic substance catabolic process);GO:0005623(cell);GO:0061630(ubiquitin protein ligase activity);GO:0071704(organic substance metabolic process);GO:0006807(nitrogen compound metabolic process);GO:0043161(proteasome-mediated ubiquitin-dependent protein catabolic process);GO:0009057(macromolecule catabolic process);GO:0043227(membrane-bounded organelle);GO:0016…	NA
PC-3p-12911_938	XM_016115678.2	1381	1402	1393	-28.7	-18.9	0.658537	8	2-6,1401-1397;8-17,1395-1386;18-21,1384-1381	1-1,1402-1402[UP5];7-7,1396-1396[SIL];x-x,1385-1385[BULt]	((((.((((((((((.(((((.&.))))).))))))))))-))))	GCUGAAGUUGCUUGAGUGGAAC&UUUUUAAUUAAGUAGCU-CAGC	1	32.684	4	1	Output/R8h/cleaveLand_result/t_plot/PC-3p-12911_938_XM_016115678.2_1393_TPlot.pdf	2	79.2048	3	0.759342	Output/R0h/cleaveLand_result/t_plot/PC-3p-12911_938_XM_016115678.2_1393_TPlot.pdf	32.684	79.2048	-1.277	down	1.092e-05	1.21603e-05	yes	GO:0016020(membrane);GO:0051179(localization);GO:0031224(intrinsic component of membrane);GO:0051234(establishment of localization);GO:0044425(membrane part);GO:0006810(transport);GO:0016021(integral component of membrane)	NA
PC-3p-12911_938	XM_016115841.2	209	219	210	-28.7	-19.6	0.682927	2	12-21,218-209	11-11,219-219[SIL]	((((((((((.&.))))))))))	GCUGAGCUACA&UUUUUAAUUAA	0	0	NA	NA	NA	1	39.6024	4	0.999971	Output/R0h/cleaveLand_result/t_plot/PC-3p-12911_938_XM_016115841.2_210_TPlot.pdf	0	39.6024	-Inf	down	3.1118e-10	6.0287e-10	yes	NA	NA
PC-3p-12911_938	XM_016117918.2	344	364	355	-28.7	-22.88	0.797213	8.5	1-5,364-360;9-21,356-344	6-8,359-357[SIL]	(((((((((((((...(((((&)))))...)))))))))))))	GCUGGGCUACUUACAGAGAGA&UUUUUAAUUAAGUAGCUCAGC	0	0	NA	NA	NA	1	39.6024	4	0.254918	Output/R0h/cleaveLand_result/t_plot/PC-3p-12911_938_XM_016117918.2_355_TPlot.pdf	0	39.6024	-Inf	down	3.1118e-10	6.0287e-10	yes	GO:0008270(zinc ion binding);GO:0043169(cation binding);GO:0043167(ion binding);GO:0046872(metal ion binding);GO:0046914(transition metal ion binding);GO:0005488(binding)	NA
PC-3p-12911_938	XM_021127199.1	1914	1924	1915	-28.7	-19.3	0.672474	3	12-21,1923-1914	11-11,1924-1924[SIL]	((((((((((.&.))))))))))	GCUGAGCUGCA&UUUUUAAUUAA	1	32.684	4	1	Output/R8h/cleaveLand_result/t_plot/PC-3p-12911_938_XM_021127199.1_1915_TPlot.pdf	0	0	NA	NA	NA	32.684	0	Inf	up	1.084e-08	1.2485e-08	yes	GO:0004386(helicase activity);GO:0042623(ATPase activity, coupled);GO:0097367(carbohydrate derivative binding);GO:0043227(membrane-bounded organelle);GO:0017076(purine nucleotide binding);GO:0030554(adenyl nucleotide binding);GO:0005488(binding);GO:0043226(organelle);GO:0032555(purine ribonucleotide binding);GO:0016887(ATPase activity);GO:0016462(pyrophosphatase activity);GO:0005524(ATP binding);…	NA
PC-3p-12911_938	XM_021128747.1	753	775	765	-28.7	-20.1	0.700348	11.5	1-8,775-768;11-16,764-759;17-21,757-753	9-10,767-765[AILt];x-x,758-758[BULt]	(((((.((((((...((((((((&))))))))-..))))))-)))))	GCUGGUGCUACUGCUGUUGAGGA&UUUUUAAU-UAAGUAGC-UCAGC	0	0	NA	NA	NA	1	39.6024	4	0.998276	Output/R0h/cleaveLand_result/t_plot/PC-3p-12911_938_XM_021128747.1_765_TPlot.pdf	0	39.6024	-Inf	down	3.1118e-10	6.0287e-10	yes	GO:0016684(oxidoreductase activity, acting on peroxide as acceptor);GO:0003824(catalytic activity);GO:1901363(heterocyclic compound binding);GO:0016491(oxidoreductase activity);GO:0042221(response to chemical);GO:0009636(response to toxic substance);GO:1990748(cellular detoxification);GO:0098754(detoxification);GO:0004601(peroxidase activity);GO:0050896(response to stimulus);GO:0046906(tetrapyrro…	ko00053(Ascorbate and aldarate metabolism);ko00480(Glutathione metabolism)
PC-3p-12911_938	XM_021128748.1	753	775	765	-28.7	-20.1	0.700348	11.5	1-8,775-768;11-16,764-759;17-21,757-753	9-10,767-765[AILt];x-x,758-758[BULt]	(((((.((((((...((((((((&))))))))-..))))))-)))))	GCUGGUGCUACUGCUGUUGAGGA&UUUUUAAU-UAAGUAGC-UCAGC	0	0	NA	NA	NA	1	39.6024	4	0.997966	Output/R0h/cleaveLand_result/t_plot/PC-3p-12911_938_XM_021128748.1_765_TPlot.pdf	0	39.6024	-Inf	down	3.1118e-10	6.0287e-10	yes	GO:0016684(oxidoreductase activity, acting on peroxide as acceptor);GO:0003824(catalytic activity);GO:1901363(heterocyclic compound binding);GO:0016491(oxidoreductase activity);GO:0042221(response to chemical);GO:0009636(response to toxic substance);GO:1990748(cellular detoxification);GO:0098754(detoxification);GO:0004601(peroxidase activity);GO:0050896(response to stimulus);GO:0046906(tetrapyrro…	ko00053(Ascorbate and aldarate metabolism);ko00480(Glutathione metabolism)
PC-3p-12911_938	XM_021132052.1	824	844	835	-28.7	-19.6	0.682927	16.5	9-21,836-824	1-8,844-837[UP5]	(((((((((((((........&........)))))))))))))	GCUGAGUUACUUGCUGCUGCC&UUUUUAAUUAAGUAGCUCAGC	0	0	NA	NA	NA	1	39.6024	4	0.999965	Output/R0h/cleaveLand_result/t_plot/PC-3p-12911_938_XM_021132052.1_835_TPlot.pdf	0	39.6024	-Inf	down	3.1118e-10	6.0287e-10	yes	GO:0033036(macromolecule localization);GO:0043231(intracellular membrane-bounded organelle);GO:0033365(protein localization to organelle);GO:0071705(nitrogen compound transport);GO:0043227(membrane-bounded organelle);GO:0071702(organic substance transport);GO:0008565(protein transporter activity);GO:0005737(cytoplasm);GO:0015031(protein transport);GO:0051234(establishment of localization);GO:0034…	NA
PC-3p-12911_938	XM_021137257.1	2281	2301	2292	-28.7	-19.5	0.679443	7.5	2-5,2300-2297;8-13,2294-2289;15-21,2287-2281	1-1,2301-2301[UP5];6-7,2296-2295[SIL];14-14,2288-2288[SIL]	(((((((.((((((..((((.&.))))..)))))).)))))))	GCUGAGCAGCUUAAGGGAAAU&UUUUUAAUUAAGUAGCUCAGC	1	32.684	4	0.999999	Output/R8h/cleaveLand_result/t_plot/PC-3p-12911_938_XM_021137257.1_2292_TPlot.pdf	0	0	NA	NA	NA	32.684	0	Inf	up	1.084e-08	1.2485e-08	yes	GO:0017111(nucleoside-triphosphatase activity);GO:0003824(catalytic activity);GO:0044424(intracellular part);GO:0008092(cytoskeletal protein binding);GO:0032991(macromolecular complex);GO:0006928(movement of cell or subcellular component);GO:0016818(hydrolase activity, acting on acid anhydrides, in phosphorus-containing anhydrides);GO:0007018(microtubule-based movement);GO:1990939(ATP-dependent m…	NA
PC-3p-12911_938	XM_021137571.1	901	926	913	-28.7	-19.66	0.685017	15.5	1-6,926-921;9-14,914-909;15-21,907-901	7-8,920-915[AILt];x-x,908-908[BULt]	(((((((.((((((......((((((&))))))----..))))))-)))))))	GCUGAGCUUGCUUAUGUGGGUGAAGA&UUUUUA----AUUAAGUA-GCUCAGC	0	0	NA	NA	NA	1	39.6024	4	0.999939	Output/R0h/cleaveLand_result/t_plot/PC-3p-12911_938_XM_021137571.1_913_TPlot.pdf	0	39.6024	-Inf	down	3.1118e-10	6.0287e-10	yes	GO:0005355(glucose transmembrane transporter activity);GO:0005215(transporter activity);GO:1904659(glucose transmembrane transport);GO:0015749(monosaccharide transport);GO:0005623(cell);GO:0055085(transmembrane transport);GO:0015144(carbohydrate transmembrane transporter activity);GO:0005402(cation:sugar symporter activity);GO:0015294(solute:cation symporter activity);GO:0015075(ion transmembrane…	NA
PC-3p-12911_938	XM_021137572.1	799	824	811	-28.7	-19.66	0.685017	15.5	1-6,824-819;9-14,812-807;15-21,805-799	7-8,818-813[AILt];x-x,806-806[BULt]	(((((((.((((((......((((((&))))))----..))))))-)))))))	GCUGAGCUUGCUUAUGUGGGUGAAGA&UUUUUA----AUUAAGUA-GCUCAGC	0	0	NA	NA	NA	1	39.6024	4	0.999943	Output/R0h/cleaveLand_result/t_plot/PC-3p-12911_938_XM_021137572.1_811_TPlot.pdf	0	39.6024	-Inf	down	3.1118e-10	6.0287e-10	yes	GO:0005355(glucose transmembrane transporter activity);GO:0005215(transporter activity);GO:1904659(glucose transmembrane transport);GO:0015749(monosaccharide transport);GO:0005623(cell);GO:0055085(transmembrane transport);GO:0015144(carbohydrate transmembrane transporter activity);GO:0005402(cation:sugar symporter activity);GO:0015294(solute:cation symporter activity);GO:0015075(ion transmembrane…	NA
PC-3p-12911_938	XM_021139531.1	171	181	172	-28.7	-19	0.662021	2	12-21,180-171	11-11,181-181[SIL]	((((((((((.&.))))))))))	GCUGAGCUACC&UUUUUAAUUAA	0	0	NA	NA	NA	1	39.6024	4	1	Output/R0h/cleaveLand_result/t_plot/PC-3p-12911_938_XM_021139531.1_172_TPlot.pdf	0	39.6024	-Inf	down	3.1118e-10	6.0287e-10	yes	GO:0006725(cellular aromatic compound metabolic process);GO:0043227(membrane-bounded organelle);GO:0097159(organic cyclic compound binding);GO:0043412(macromolecule modification);GO:0016070(RNA metabolic process);GO:0005622(intracellular);GO:1901363(heterocyclic compound binding);GO:0004519(endonuclease activity);GO:0044260(cellular macromolecule metabolic process);GO:0090304(nucleic acid metabol…	NA
PC-3p-12911_938	XM_021139532.1	822	832	823	-28.7	-19	0.662021	2	12-21,831-822	11-11,832-832[SIL]	((((((((((.&.))))))))))	GCUGAGCUACC&UUUUUAAUUAA	0	0	NA	NA	NA	2	79.2048	0	0.17001	Output/R0h/cleaveLand_result/t_plot/PC-3p-12911_938_XM_021139532.1_823_TPlot.pdf	0	79.2048	-Inf	down	5.5905e-19	3.89431e-18	yes	GO:0006725(cellular aromatic compound metabolic process);GO:0043227(membrane-bounded organelle);GO:0097159(organic cyclic compound binding);GO:0043412(macromolecule modification);GO:0016070(RNA metabolic process);GO:0005622(intracellular);GO:1901363(heterocyclic compound binding);GO:0004519(endonuclease activity);GO:0044260(cellular macromolecule metabolic process);GO:0090304(nucleic acid metabol…	NA
PC-3p-12911_938	XM_021140431.1	120	142	132	-28.7	-21.5	0.749129	9.5	1-9,142-134;11-16,131-126;17-21,124-120	10-10,133-132[AILt];x-x,125-125[BULt]	(((((.((((((..(((((((((&)))))))))-.))))))-)))))	GCUGAGGCUGCUAGGAUUAGGGA&UUUUUAAUU-AAGUAGC-UCAGC	1	32.684	4	0.670227	Output/R8h/cleaveLand_result/t_plot/PC-3p-12911_938_XM_021140431.1_132_TPlot.pdf	0	0	NA	NA	NA	32.684	0	Inf	up	1.084e-08	1.2485e-08	yes	GO:0009987(cellular process);GO:0061919(process utilizing autophagic mechanism);GO:0006914(autophagy);GO:0008152(metabolic process);GO:0009056(catabolic process);GO:0044248(cellular catabolic process);GO:0044237(cellular metabolic process)	ko04136(Autophagy - other)
PC-3p-12911_938	XM_021142288.1	1017	1037	1028	-28.7	-19.5	0.679443	7	3-12,1035-1026;14-17,1025-1022;18-21,1020-1017	1-2,1037-1036[UP5];13-13,x-x[BULq];x-x,1021-1021[BULt]	((((.((((-((((((((((..&..)))))))))).))))-))))	GCUGAAGCU-CUUAAUUGGACA&UUUUUAAUUAAGUAGCU-CAGC	1	32.684	4	0.999999	Output/R8h/cleaveLand_result/t_plot/PC-3p-12911_938_XM_021142288.1_1028_TPlot.pdf	0	0	NA	NA	NA	32.684	0	Inf	up	1.084e-08	1.2485e-08	yes	NA	ko04626(Plant-pathogen interaction)
PC-3p-12911_938	XM_021143289.1	837	847	838	-28.7	-18.8	0.655052	3	12-21,846-837	11-11,847-847[SIL]	((((((((((.&.))))))))))	GCUGAGCUGCC&UUUUUAAUUAA	1	32.684	4	1	Output/R8h/cleaveLand_result/t_plot/PC-3p-12911_938_XM_021143289.1_838_TPlot.pdf	1	39.6024	4	1	Output/R0h/cleaveLand_result/t_plot/PC-3p-12911_938_XM_021143289.1_838_TPlot.pdf	32.684	39.6024	-0.277003	down	0.4158	0.417305	yes	GO:0003676(nucleic acid binding);GO:0005488(binding);GO:0097159(organic cyclic compound binding);GO:1901363(heterocyclic compound binding)	NA
PC-3p-12911_938	XM_021143837.1	734	758	749	-28.7	-19.7	0.686411	12	3-13,756-746;14-21,741-734	1-2,758-757[UP5];x-x,745-742[BULt]	((((((((....(((((((((((..&..)))))))))))----))))))))	GCUGAGUUUUUGGCUUGGUUGGAUU&UUUUUAAUUAAGU----AGCUCAGC	0	0	NA	NA	NA	1	39.6024	4	0.999833	Output/R0h/cleaveLand_result/t_plot/PC-3p-12911_938_XM_021143837.1_749_TPlot.pdf	0	39.6024	-Inf	down	3.1118e-10	6.0287e-10	yes	GO:0031224(intrinsic component of membrane);GO:0004659(prenyltransferase activity);GO:0016740(transferase activity);GO:0016021(integral component of membrane);GO:0016765(transferase activity, transferring alkyl or aryl (other than methyl) groups);GO:0016020(membrane);GO:0003824(catalytic activity);GO:0044425(membrane part)	ko01100(Metabolic pathways);ko00130(Ubiquinone and other terpenoid-quinone biosynthesis);ko01110(Biosynthesis of secondary metabolites)
PC-3p-13278_910	BGI_novel_T003883	1945	1965	1957	-37	-24.8	0.67027	10.5	3-7,1963-1959;10-19,1957-1948;20-21,1946-1945	1-2,1965-1964[UP5];8-9,1958-1958[AILq];x-x,1947-1947[BULt]	((.((((((((((.-(((((..&..)))))..))))))))))-))	GCUCAAGAGCAGUG-GCCGACU&UUUUGGCAAGCUGUUCUUG-GC	1	32.684	4	1	Output/R8h/cleaveLand_result/t_plot/PC-3p-13278_910_BGI_novel_T003883_1957_TPlot.pdf	0	0	NA	NA	NA	32.684	0	Inf	up	1.084e-08	1.2485e-08	yes	GO:0016021(integral component of membrane);GO:0016884(carbon-nitrogen ligase activity, with glutamine as amido-N-donor);GO:0003824(catalytic activity);GO:0016740(transferase activity);GO:0004040(amidase activity);GO:0016020(membrane);GO:0031224(intrinsic component of membrane);GO:0016874(ligase activity);GO:0016879(ligase activity, forming carbon-nitrogen bonds);GO:0016810(hydrolase activity, act…	ko00380(Tryptophan metabolism);ko01100(Metabolic pathways);ko00330(Arginine and proline metabolism);ko00970(Aminoacyl-tRNA biosynthesis);ko00360(Phenylalanine metabolism)
PC-3p-13278_910	BGI_novel_T004742	1934	1953	1944	-37	-27.6	0.745946	7	4-14,1950-1940;16-20,1939-1935	1-3,1953-1951[UP5];15-15,x-x[BULq];21-21,1934-1934[UP3]	.(((((-(((((((((((...&...))))))))))).))))).	CCCAAG-ACAGCUUGCCAUCA&UUUUGGCAAGCUGUUCUUGGC	2	65.368	2	0.482453	Output/R8h/cleaveLand_result/t_plot/PC-3p-13278_910_BGI_novel_T004742_1944_TPlot.pdf	0	0	NA	NA	NA	65.368	0	Inf	up	6.2072e-16	2.71719e-15	yes	GO:0097159(organic cyclic compound binding);GO:0044464(cell part);GO:0003677(DNA binding);GO:0043227(membrane-bounded organelle);GO:0016020(membrane);GO:0005622(intracellular);GO:0043226(organelle);GO:1901363(heterocyclic compound binding);GO:0005623(cell);GO:0043231(intracellular membrane-bounded organelle);GO:0043229(intracellular organelle);GO:0003676(nucleic acid binding);GO:0005634(nucleus);…	ko04075(Plant hormone signal transduction)
PC-3p-13278_910	BGI_novel_T004873	190	209	201	-37	-25.3	0.683784	10.5	4-7,206-203;10-14,201-197;16-21,195-190	1-3,209-207[UP5];8-9,202-202[AILq];15-15,196-196[SIL]	((((((.(((((.-((((...&...))))..))))).))))))	GCCAAGCGCAGCG-GCCACGA&UUUUGGCAAGCUGUUCUUGGC	1	32.684	4	0.999999	Output/R8h/cleaveLand_result/t_plot/PC-3p-13278_910_BGI_novel_T004873_201_TPlot.pdf	0	0	NA	NA	NA	32.684	0	Inf	up	1.084e-08	1.2485e-08	yes	NA	ko03008(Ribosome biogenesis in eukaryotes)
PC-3p-13278_910	BGI_novel_T005128	1008	1029	1020	-37	-25.8	0.697297	6	1-12,1029-1018;14-19,1015-1010	13-13,1017-1016[AILt];20-21,1009-1008[UP3]	..((((((..((((((((((((&))))))))))))-.))))))..	AACAAGAAGGAGCUUGCCAAGA&UUUUGGCAAGCU-GUUCUUGGC	1	32.684	4	0.999612	Output/R8h/cleaveLand_result/t_plot/PC-3p-13278_910_BGI_novel_T005128_1020_TPlot.pdf	0	0	NA	NA	NA	32.684	0	Inf	up	1.084e-08	1.2485e-08	yes	GO:0044422(organelle part);GO:0032991(macromolecular complex);GO:0097159(organic cyclic compound binding);GO:0005488(binding);GO:0005875(microtubule associated complex);GO:0016818(hydrolase activity, acting on acid anhydrides, in phosphorus-containing anhydrides);GO:0036094(small molecule binding);GO:0044464(cell part);GO:0035639(purine ribonucleoside triphosphate binding);GO:0017076(purine nucle…	NA
PC-3p-13278_910	BGI_novel_T005261	464	483	476	-37	-25.2	0.681081	8	1-7,483-477;10-19,476-467;20-21,465-464	8-9,x-x[BULq];x-x,466-466[BULt]	((.((((((((((--(((((((&)))))))..))))))))))-))	GCGCAAGGGCGGC--GCCAAGA&UUUUGGCAAGCUGUUCUUG-GC	1	32.684	4	1	Output/R8h/cleaveLand_result/t_plot/PC-3p-13278_910_BGI_novel_T005261_476_TPlot.pdf	0	0	NA	NA	NA	32.684	0	Inf	up	1.084e-08	1.2485e-08	yes	GO:0006289(nucleotide-excision repair);GO:0006950(response to stress);GO:0006303(double-strand break repair via nonhomologous end joining);GO:0090304(nucleic acid metabolic process);GO:0006281(DNA repair);GO:0044260(cellular macromolecule metabolic process);GO:0044249(cellular biosynthetic process);GO:0032559(adenyl ribonucleotide binding);GO:0003676(nucleic acid binding);GO:0016886(ligase activi…	ko03450(Non-homologous end-joining)
PC-3p-13278_910	BGI_novel_T005315	298	320	311	-37	-25.6	0.691892	11	5-12,316-309;14-17,307-304;18-21,301-298	1-4,320-317[UP5];13-13,308-308[SIL];x-x,303-302[BULt]	((((..((((.((((((((....&....)))))))).))))--))))	GCCGACAGAGGAGCUUGCCUCCG&UUUUGGCAAGCUGUUCU--UGGC	1	32.684	4	0.999974	Output/R8h/cleaveLand_result/t_plot/PC-3p-13278_910_BGI_novel_T005315_311_TPlot.pdf	0	0	NA	NA	NA	32.684	0	Inf	up	1.084e-08	1.2485e-08	yes	GO:0050789(regulation of biological process);GO:0030234(enzyme regulator activity);GO:0006810(transport);GO:0060341(regulation of cellular localization);GO:0060589(nucleoside-triphosphatase regulator activity);GO:0044425(membrane part);GO:0048209(regulation of vesicle targeting, to, from or within Golgi);GO:0009306(protein secretion);GO:0016491(oxidoreductase activity);GO:0016628(oxidoreductase a…	ko04141(Protein processing in endoplasmic reticulum)
PC-3p-13278_910	BGI_novel_T006120	639	658	649	-37	-25.3	0.683784	10	5-8,654-651;10-17,649-642;19-21,641-639	1-4,658-655[UP5];9-9,650-650[SIL];18-18,x-x[BULq]	(((-((((((((.((((....&....)))).)))))))).)))	GCC-AGAACAGCGUGCCCUUC&UUUUGGCAAGCUGUUCUUGGC	0	0	NA	NA	NA	1	39.6024	4	0.999978	Output/R0h/cleaveLand_result/t_plot/PC-3p-13278_910_BGI_novel_T006120_649_TPlot.pdf	0	39.6024	-Inf	down	3.1118e-10	6.0287e-10	yes	GO:0009987(cellular process);GO:0016021(integral component of membrane);GO:0016192(vesicle-mediated transport);GO:0044425(membrane part);GO:0098796(membrane protein complex);GO:0044444(cytoplasmic part);GO:0022406(membrane docking);GO:0016020(membrane);GO:0071702(organic substance transport);GO:0008104(protein localization);GO:0016043(cellular component organization);GO:0046907(intracellular tran…	ko04130(SNARE interactions in vesicular transport);ko04145(Phagosome)
PC-3p-13278_910	BGI_novel_T006121	741	760	751	-37	-25.3	0.683784	10	5-8,756-753;10-17,751-744;19-21,743-741	1-4,760-757[UP5];9-9,752-752[SIL];18-18,x-x[BULq]	(((-((((((((.((((....&....)))).)))))))).)))	GCC-AGAACAGCGUGCCCUUC&UUUUGGCAAGCUGUUCUUGGC	1	32.684	4	0.999999	Output/R8h/cleaveLand_result/t_plot/PC-3p-13278_910_BGI_novel_T006121_751_TPlot.pdf	1	39.6024	4	0.999988	Output/R0h/cleaveLand_result/t_plot/PC-3p-13278_910_BGI_novel_T006121_751_TPlot.pdf	32.684	39.6024	-0.277003	down	0.4158	0.417305	yes	GO:0009987(cellular process);GO:0016021(integral component of membrane);GO:0016192(vesicle-mediated transport);GO:0044425(membrane part);GO:0098796(membrane protein complex);GO:0044444(cytoplasmic part);GO:0022406(membrane docking);GO:0016020(membrane);GO:0071702(organic substance transport);GO:0008104(protein localization);GO:0016043(cellular component organization);GO:0046907(intracellular tran…	ko04130(SNARE interactions in vesicular transport);ko04145(Phagosome)
PC-3p-13278_910	BGI_novel_T006123	741	760	751	-37	-25.3	0.683784	10	5-8,756-753;10-17,751-744;19-21,743-741	1-4,760-757[UP5];9-9,752-752[SIL];18-18,x-x[BULq]	(((-((((((((.((((....&....)))).)))))))).)))	GCC-AGAACAGCGUGCCCUUC&UUUUGGCAAGCUGUUCUUGGC	1	32.684	4	0.999999	Output/R8h/cleaveLand_result/t_plot/PC-3p-13278_910_BGI_novel_T006123_751_TPlot.pdf	1	39.6024	4	0.999987	Output/R0h/cleaveLand_result/t_plot/PC-3p-13278_910_BGI_novel_T006123_751_TPlot.pdf	32.684	39.6024	-0.277003	down	0.4158	0.417305	yes	GO:0009987(cellular process);GO:0016021(integral component of membrane);GO:0016192(vesicle-mediated transport);GO:0044425(membrane part);GO:0098796(membrane protein complex);GO:0044444(cytoplasmic part);GO:0022406(membrane docking);GO:0016020(membrane);GO:0071702(organic substance transport);GO:0008104(protein localization);GO:0016043(cellular component organization);GO:0046907(intracellular tran…	ko04130(SNARE interactions in vesicular transport);ko04145(Phagosome)
PC-3p-13278_910	BGI_novel_T006304	1080	1100	1091	-37	-24.8	0.67027	4	1-13,1100-1088;15-16,1086-1085;18-20,1083-1081	14-14,1087-1087[SIL];17-17,1084-1084[SIL];21-21,1080-1080[UP3]	.(((.((.(((((((((((((&))))))))))))).)).))).	ACCAUGAUCAGCUUGUCAAAA&UUUUGGCAAGCUGUUCUUGGC	0	0	NA	NA	NA	1	39.6024	4	1	Output/R0h/cleaveLand_result/t_plot/PC-3p-13278_910_BGI_novel_T006304_1091_TPlot.pdf	0	39.6024	-Inf	down	3.1118e-10	6.0287e-10	yes	GO:0005524(ATP binding);GO:1901363(heterocyclic compound binding);GO:1901564(organonitrogen compound metabolic process);GO:0043170(macromolecule metabolic process);GO:0008152(metabolic process);GO:0003824(catalytic activity);GO:0044237(cellular metabolic process);GO:0032555(purine ribonucleotide binding);GO:0043167(ion binding);GO:0036211(protein modification process);GO:0006468(protein phosphory…	ko03008(Ribosome biogenesis in eukaryotes);ko04712(Circadian rhythm - plant)
PC-3p-13278_910	BGI_novel_T009469	3415	3443	3426	-37	-24.1	0.651351	23	4-9,3440-3435;10-20,3426-3416	1-3,3443-3441[UP5];x-x,3434-3427[BULt];21-21,3415-3415[UP3]	.(((((((((((........((((((...&...))))))--------))))))))))).	ACCGAGGACAGCAGACAAUUUUGCCAUGC&UUUUGGCAA--------GCUGUUCUUGGC	0	0	NA	NA	NA	1	39.6024	4	1	Output/R0h/cleaveLand_result/t_plot/PC-3p-13278_910_BGI_novel_T009469_3426_TPlot.pdf	0	39.6024	-Inf	down	3.1118e-10	6.0287e-10	yes	GO:0044431(Golgi apparatus part);GO:0030665(clathrin-coated vesicle membrane);GO:0016043(cellular component organization);GO:0098805(whole membrane);GO:0044424(intracellular part);GO:0030276(clathrin binding);GO:0030125(clathrin vesicle coat);GO:0051641(cellular localization);GO:0005488(binding);GO:0034613(cellular protein localization);GO:0005515(protein binding);GO:0031410(cytoplasmic vesicle);…	ko04144(Endocytosis)
PC-3p-13278_910	BGI_novel_T010403	361	382	373	-37	-24.3	0.656757	8	2-15,381-368;16-18,366-364;20-21,362-361	1-1,382-382[UP5];x-x,367-367[BULt];19-19,363-363[SIL]	((.(((.((((((((((((((.&.))))))))))))))-))).))	GCGGAGAAGCGGUUUGCUGAAG&UUUUGGCAAGCUGUU-CUUGGC	0	0	NA	NA	NA	1	39.6024	4	1	Output/R0h/cleaveLand_result/t_plot/PC-3p-13278_910_BGI_novel_T010403_373_TPlot.pdf	0	39.6024	-Inf	down	3.1118e-10	6.0287e-10	yes	GO:0010556(regulation of macromolecule biosynthetic process);GO:0090304(nucleic acid metabolic process);GO:0018130(heterocycle biosynthetic process);GO:1901360(organic cyclic compound metabolic process);GO:1903506(regulation of nucleic acid-templated transcription);GO:0005488(binding);GO:0046483(heterocycle metabolic process);GO:0006351(transcription, DNA-templated);GO:0032774(RNA biosynthetic pr…	NA
PC-3p-13278_910	BGI_novel_T010923	1550	1571	1562	-37	-26.2	0.708108	6.5	2-5,1570-1567;7-12,1565-1560;14-21,1557-1550	1-1,1571-1571[UP5];6-6,1566-1566[SIL];13-13,1559-1558[AILt]	((((((((..((((((.((((.&.)))).))))))-.))))))))	GCCAGGAAAAAGCUUGGCAAAG&UUUUGGCAAGCU-GUUCUUGGC	1	32.684	4	0.996509	Output/R8h/cleaveLand_result/t_plot/PC-3p-13278_910_BGI_novel_T010923_1562_TPlot.pdf	0	0	NA	NA	NA	32.684	0	Inf	up	1.084e-08	1.2485e-08	yes	GO:0003824(catalytic activity);GO:0016787(hydrolase activity);GO:0016810(hydrolase activity, acting on carbon-nitrogen (but not peptide) bonds)	ko00970(Aminoacyl-tRNA biosynthesis)
PC-3p-13278_910	BGI_novel_T012788	1570	1591	1582	-37	-24.5	0.662162	9	4-10,1588-1582;12-14,1580-1578;15-21,1576-1570	1-3,1591-1589[UP5];11-11,1581-1581[SIL];x-x,1577-1577[BULt]	(((((((.(((.(((((((...&...))))))).)))-)))))))	GCCAAGAUACAUCUUGCCGCUA&UUUUGGCAAGCUGU-UCUUGGC	1	32.684	4	1	Output/R8h/cleaveLand_result/t_plot/PC-3p-13278_910_BGI_novel_T012788_1582_TPlot.pdf	0	0	NA	NA	NA	32.684	0	Inf	up	1.084e-08	1.2485e-08	yes	GO:1901363(heterocyclic compound binding);GO:0043168(anion binding);GO:0004672(protein kinase activity);GO:0030554(adenyl nucleotide binding);GO:1901265(nucleoside phosphate binding);GO:0006796(phosphate-containing compound metabolic process);GO:1901564(organonitrogen compound metabolic process);GO:0032559(adenyl ribonucleotide binding);GO:0007154(cell communication);GO:0009987(cellular process);…	NA
PC-3p-13278_910	BGI_novel_T012791	1337	1358	1349	-37	-24.5	0.662162	9	4-10,1355-1349;12-14,1347-1345;15-21,1343-1337	1-3,1358-1356[UP5];11-11,1348-1348[SIL];x-x,1344-1344[BULt]	(((((((.(((.(((((((...&...))))))).)))-)))))))	GCCAAGAUACAUCUUGCCGCUA&UUUUGGCAAGCUGU-UCUUGGC	1	32.684	4	1	Output/R8h/cleaveLand_result/t_plot/PC-3p-13278_910_BGI_novel_T012791_1349_TPlot.pdf	0	0	NA	NA	NA	32.684	0	Inf	up	1.084e-08	1.2485e-08	yes	GO:1901363(heterocyclic compound binding);GO:0043168(anion binding);GO:0004672(protein kinase activity);GO:0030554(adenyl nucleotide binding);GO:1901265(nucleoside phosphate binding);GO:0006796(phosphate-containing compound metabolic process);GO:1901564(organonitrogen compound metabolic process);GO:0032559(adenyl ribonucleotide binding);GO:0007154(cell communication);GO:0009987(cellular process);…	NA
PC-3p-13278_910	BGI_novel_T014179	2056	2081	2067	-37	-24.52	0.662703	20.5	5-8,2077-2074;10-21,2067-2056	1-4,2081-2078[UP5];9-9,2073-2068[AILt]	((((((((((((......((((....&....))))-----.))))))))))))	GCCGAGGGCAGCCCCCUCUGCCCCUC&UUUUGGCA-----AGCUGUUCUUGGC	0	0	NA	NA	NA	1	39.6024	4	1	Output/R0h/cleaveLand_result/t_plot/PC-3p-13278_910_BGI_novel_T014179_2067_TPlot.pdf	0	39.6024	-Inf	down	3.1118e-10	6.0287e-10	yes	NA	ko01100(Metabolic pathways);ko00190(Oxidative phosphorylation)
PC-3p-13278_910	XM_016077341.2	656	676	667	-37	-25.8	0.697297	6	2-18,675-659	1-1,676-676[UP5];19-21,658-656[UP3]	...(((((((((((((((((.&.)))))))))))))))))...	UCAAAGAACAGCUUGCUAAGU&UUUUGGCAAGCUGUUCUUGGC	1	32.684	4	0.999689	Output/R8h/cleaveLand_result/t_plot/PC-3p-13278_910_XM_016077341.2_667_TPlot.pdf	0	0	NA	NA	NA	32.684	0	Inf	up	1.084e-08	1.2485e-08	yes	NA	NA
PC-3p-13278_910	XM_016077350.2	823	842	833	-37	-24.6	0.664865	11.5	5-14,838-829;16-21,828-823	1-4,842-839[UP5];15-15,x-x[BULq]	((((((-((((((((((....&....)))))))))).))))))	GCCAGG-ACGGCUUGUUGCAC&UUUUGGCAAGCUGUUCUUGGC	0	0	NA	NA	NA	1	39.6024	4	1	Output/R0h/cleaveLand_result/t_plot/PC-3p-13278_910_XM_016077350.2_833_TPlot.pdf	0	39.6024	-Inf	down	3.1118e-10	6.0287e-10	yes	GO:0036211(protein modification process);GO:0050896(response to stimulus);GO:0005524(ATP binding);GO:0065007(biological regulation);GO:0009987(cellular process);GO:1901363(heterocyclic compound binding);GO:0050789(regulation of biological process);GO:0043170(macromolecule metabolic process);GO:0006464(cellular protein modification process);GO:0016310(phosphorylation);GO:0043167(ion binding);GO:00…	NA
PC-3p-13278_910	XM_016077959.2	1627	1651	1640	-37	-24.6	0.664865	9.5	1-8,1651-1644;9-14,1641-1636;15-21,1633-1627	x-x,1643-1642[BULt];x-x,1635-1634[BULt]	(((((((..((((((..((((((((&))))))))--))))))--)))))))	GCCAAGGAUGCGGCUCCUGUCAAAG&UUUUGGCA--AGCUGU--UCUUGGC	0	0	NA	NA	NA	2	79.2048	2	0.997989	Output/R0h/cleaveLand_result/t_plot/PC-3p-13278_910_XM_016077959.2_1640_TPlot.pdf	0	79.2048	-Inf	down	5.5905e-19	3.89431e-18	yes	GO:0044260(cellular macromolecule metabolic process);GO:0000166(nucleotide binding);GO:0006412(translation);GO:0034645(cellular macromolecule biosynthetic process);GO:0097159(organic cyclic compound binding);GO:0017076(purine nucleotide binding);GO:0032561(guanyl ribonucleotide binding);GO:0008135(translation factor activity, RNA binding);GO:0001882(nucleoside binding);GO:0003824(catalytic activi…	NA
PC-3p-13278_910	XM_016078762.2	979	1000	991	-37	-24.1	0.651351	12	5-10,996-991;12-21,988-979	1-4,1000-997[UP5];11-11,990-989[AILt]	((((((((((..((((((....&....))))))-.))))))))))	GCCAAGAACAAAUUUGCCUGUG&UUUUGGCAAG-CUGUUCUUGGC	2	65.368	2	0.999992	Output/R8h/cleaveLand_result/t_plot/PC-3p-13278_910_XM_016078762.2_991_TPlot.pdf	0	0	NA	NA	NA	65.368	0	Inf	up	6.2072e-16	2.71719e-15	yes	GO:1903506(regulation of nucleic acid-templated transcription);GO:0003677(DNA binding);GO:0060255(regulation of macromolecule metabolic process);GO:0050789(regulation of biological process);GO:0010468(regulation of gene expression);GO:0010556(regulation of macromolecule biosynthetic process);GO:0005488(binding);GO:0006355(regulation of transcription, DNA-templated);GO:2000112(regulation of cellul…	ko04075(Plant hormone signal transduction)
PC-3p-13278_910	XM_016080992.2	711	731	722	-37	-25.6	0.691892	6.5	1-7,731-725;10-19,722-713	8-9,724-723[SIL];20-21,712-711[UP3]	..((((((((((..(((((((&)))))))..))))))))))..	UGCAAGAACAGCAAGCCAAAG&UUUUGGCAAGCUGUUCUUGGC	2	65.368	2	0.974839	Output/R8h/cleaveLand_result/t_plot/PC-3p-13278_910_XM_016080992.2_722_TPlot.pdf	0	0	NA	NA	NA	65.368	0	Inf	up	6.2072e-16	2.71719e-15	yes	GO:0055114(oxidation-reduction process);GO:0016491(oxidoreductase activity);GO:0046906(tetrapyrrole binding);GO:0016209(antioxidant activity);GO:0006979(response to oxidative stress);GO:0097159(organic cyclic compound binding);GO:0098869(cellular oxidant detoxification);GO:0009636(response to toxic substance);GO:0005488(binding);GO:0008152(metabolic process);GO:0050896(response to stimulus);GO:00…	ko01110(Biosynthesis of secondary metabolites);ko00940(Phenylpropanoid biosynthesis);ko01100(Metabolic pathways)
PC-3p-13278_910	XM_016082158.2	1144	1165	1156	-37	-26.3	0.710811	4.5	1-15,1165-1151;16-21,1149-1144	x-x,1150-1150[BULt]	((((((.(((((((((((((((&)))))))))))))))-))))))	GUUGAGCAACAGUUUGCCGAAA&UUUUGGCAAGCUGUU-CUUGGC	1	32.684	4	0.995831	Output/R8h/cleaveLand_result/t_plot/PC-3p-13278_910_XM_016082158.2_1156_TPlot.pdf	0	0	NA	NA	NA	32.684	0	Inf	up	1.084e-08	1.2485e-08	yes	NA	ko03008(Ribosome biogenesis in eukaryotes)
PC-3p-13278_910	XM_016082657.2	590	611	601	-37	-24.3	0.656757	10	3-6,609-606;7-7,604-604;9-20,602-591	1-2,611-610[UP5];x-x,605-605[BULt];8-8,603-603[SIL];21-21,590-590[UP3]	.((((((((((((.(.((((..&..))))-).)))))))))))).	UCCGAGAGCAGCUCGACCGACG&UUUUGG-CAAGCUGUUCUUGGC	5	163.42	2	0.999975	Output/R8h/cleaveLand_result/t_plot/PC-3p-13278_910_XM_016082657.2_601_TPlot.pdf	0	0	NA	NA	NA	163.42	0	Inf	up	2.0116e-37	7.98927e-36	yes	GO:0031323(regulation of cellular metabolic process);GO:0031326(regulation of cellular biosynthetic process);GO:0060255(regulation of macromolecule metabolic process);GO:1901363(heterocyclic compound binding);GO:0080090(regulation of primary metabolic process);GO:0097159(organic cyclic compound binding);GO:0010468(regulation of gene expression);GO:0051252(regulation of RNA metabolic process);GO:2…	ko04626(Plant-pathogen interaction);ko04016(MAPK signaling pathway - plant)
PC-3p-13278_910	XM_016082670.2	831	852	843	-37	-24.9	0.672973	7	1-9,852-844;11-18,842-835;19-21,833-831	10-10,843-843[SIL];x-x,834-834[BULt]	(((.((((((((.(((((((((&))))))))).))))))))-)))	GCUGAGGAACAGGUUGCUGAGA&UUUUGGCAAGCUGUUCUU-GGC	3	98.052	2	0.997654	Output/R8h/cleaveLand_result/t_plot/PC-3p-13278_910_XM_016082670.2_843_TPlot.pdf	1	39.6024	4	1	Output/R0h/cleaveLand_result/t_plot/PC-3p-13278_910_XM_016082670.2_843_TPlot.pdf	98.052	39.6024	1.30796	up	6.2938e-07	7.14036e-07	yes	GO:0003824(catalytic activity);GO:0015399(primary active transmembrane transporter activity);GO:0005773(vacuole);GO:0016817(hydrolase activity, acting on acid anhydrides);GO:0031090(organelle membrane);GO:0005623(cell);GO:0098805(whole membrane);GO:0043227(membrane-bounded organelle);GO:0016462(pyrophosphatase activity);GO:0005794(Golgi apparatus);GO:0016020(membrane);GO:0043492(ATPase activity, …	ko00190(Oxidative phosphorylation);ko04145(Phagosome);ko01100(Metabolic pathways)
PC-3p-13278_910	XM_016082996.2	884	905	896	-37	-24.5	0.662162	10	2-4,904-902;7-12,899-894;13-21,892-884	1-1,905-905[UP5];5-6,901-900[SIL];x-x,893-893[BULt]	(((((((((.((((((..(((.&.)))..))))))-)))))))))	GCCGGGAACAAGCUUGAAGGAU&UUUUGGCAAGCU-GUUCUUGGC	0	0	NA	NA	NA	1	39.6024	4	1	Output/R0h/cleaveLand_result/t_plot/PC-3p-13278_910_XM_016082996.2_896_TPlot.pdf	0	39.6024	-Inf	down	3.1118e-10	6.0287e-10	yes	NA	NA
PC-3p-13278_910	XM_016084548.2	587	606	598	-37	-24.2	0.654054	5.5	1-6,606-601;8-20,600-588	7-7,x-x[BULq];21-21,587-587[UP3]	.(((((((((((((-((((((&)))))).))))))))))))).	UCCAAGAACAGCUU-CUGAAG&UUUUGGCAAGCUGUUCUUGGC	0	0	NA	NA	NA	1	39.6024	4	1	Output/R0h/cleaveLand_result/t_plot/PC-3p-13278_910_XM_016084548.2_598_TPlot.pdf	0	39.6024	-Inf	down	3.1118e-10	6.0287e-10	yes	GO:0051726(regulation of cell cycle);GO:0007088(regulation of mitotic nuclear division);GO:0051783(regulation of nuclear division);GO:1901991(negative regulation of mitotic cell cycle phase transition);GO:1905818(regulation of chromosome separation);GO:0033045(regulation of sister chromatid segregation);GO:0007094(mitotic spindle assembly checkpoint);GO:0045786(negative regulation of cell cycle);…	NA
PC-3p-13278_910	XM_016085115.2	1030	1052	1043	-37	-24.9	0.672973	7.5	1-4,1052-1049;6-12,1047-1041;14-17,1039-1036;18-21,1033-1030	5-5,1048-1048[SIL];13-13,1040-1040[SIL];x-x,1035-1034[BULt]	((((..((((.(((((((.((((&)))).))))))).))))--))))	GCCAUUGGAAGAGCUUGUGAAGA&UUUUGGCAAGCUGUUCU--UGGC	1	32.684	4	1	Output/R8h/cleaveLand_result/t_plot/PC-3p-13278_910_XM_016085115.2_1043_TPlot.pdf	0	0	NA	NA	NA	32.684	0	Inf	up	1.084e-08	1.2485e-08	yes	GO:0016491(oxidoreductase activity);GO:0003824(catalytic activity);GO:0008152(metabolic process);GO:0005488(binding);GO:0046872(metal ion binding);GO:0043169(cation binding);GO:0055114(oxidation-reduction process);GO:0043167(ion binding)	ko00940(Phenylpropanoid biosynthesis);ko01110(Biosynthesis of secondary metabolites)
PC-3p-13278_910	XM_016085194.2	1038	1057	1048	-37	-26.1	0.705405	7.5	3-17,1055-1041;19-21,1040-1038	1-2,1057-1056[UP5];18-18,x-x[BULq]	(((-(((((((((((((((..&..))))))))))))))).)))	GCC-AGAAUGGUUUGCCAGUU&UUUUGGCAAGCUGUUCUUGGC	1	32.684	4	0.99804	Output/R8h/cleaveLand_result/t_plot/PC-3p-13278_910_XM_016085194.2_1048_TPlot.pdf	0	0	NA	NA	NA	32.684	0	Inf	up	1.084e-08	1.2485e-08	yes	GO:0016655(oxidoreductase activity, acting on NAD(P)H, quinone or similar compound as acceptor);GO:0051287(NAD binding);GO:0016491(oxidoreductase activity);GO:0009060(aerobic respiration);GO:0005488(binding);GO:1901363(heterocyclic compound binding);GO:0008152(metabolic process);GO:0003954(NADH dehydrogenase activity);GO:0032553(ribonucleotide binding);GO:0000166(nucleotide binding);GO:0045333(ce…	ko00190(Oxidative phosphorylation);ko01100(Metabolic pathways)
PC-3p-13278_910	XM_016085537.2	416	437	427	-37	-25.6	0.691892	14.5	5-7,433-431;10-21,427-416	1-4,437-434[UP5];8-9,430-428[AILt]	((((((((((((...(((....&....)))-..))))))))))))	GCCAAGGACGGCAUCGCCCAGG&UUUUGGC-AAGCUGUUCUUGGC	0	0	NA	NA	NA	1	39.6024	4	0.999878	Output/R0h/cleaveLand_result/t_plot/PC-3p-13278_910_XM_016085537.2_427_TPlot.pdf	0	39.6024	-Inf	down	3.1118e-10	6.0287e-10	yes	GO:0044238(primary metabolic process);GO:0071013(catalytic step 2 spliceosome);GO:0044424(intracellular part);GO:1901360(organic cyclic compound metabolic process);GO:0000377(RNA splicing, via transesterification reactions with bulged adenosine as nucleophile);GO:0046483(heterocycle metabolic process);GO:0044428(nuclear part);GO:1990904(ribonucleoprotein complex);GO:0005681(spliceosomal complex);…	ko03040(Spliceosome)
PC-3p-13278_910	XM_016086451.2	765	788	779	-37	-25.24	0.682162	11	2-7,787-782;10-16,779-773;18-21,768-765	1-1,788-788[UP5];8-9,781-780[SIL];17-17,772-769[AILt]	((((....(((((((..((((((.&.))))))..)))))))---.))))	GCCACCACGAACGGCGGGCCAAGG&UUUUGGCAAGCUGUUC---UUGGC	3	98.052	3	0.743902	Output/R8h/cleaveLand_result/t_plot/PC-3p-13278_910_XM_016086451.2_779_TPlot.pdf	1	39.6024	4	0.999989	Output/R0h/cleaveLand_result/t_plot/PC-3p-13278_910_XM_016086451.2_779_TPlot.pdf	98.052	39.6024	1.30796	up	6.2938e-07	7.14036e-07	yes	GO:0043226(organelle);GO:0043231(intracellular membrane-bounded organelle);GO:1901700(response to oxygen-containing compound);GO:0003676(nucleic acid binding);GO:0003700(DNA binding transcription factor activity);GO:0010200(response to chitin);GO:0005623(cell);GO:0010033(response to organic substance);GO:0050896(response to stimulus);GO:0001067(regulatory region nucleic acid binding);GO:0043227(m…	ko04144(Endocytosis)
PC-3p-13278_910	XM_016086676.2	208	226	219	-37	-26	0.702703	8.5	2-7,225-220;10-21,219-208	1-1,226-226[UP5];8-9,x-x[BULq]	((((((((((((--((((((.&.))))))..))))))))))))	GCCAAGGACAGC--GUCAGGC&UUUUGGCAAGCUGUUCUUGGC	1	32.684	4	0.998874	Output/R8h/cleaveLand_result/t_plot/PC-3p-13278_910_XM_016086676.2_219_TPlot.pdf	1	39.6024	4	0.996403	Output/R0h/cleaveLand_result/t_plot/PC-3p-13278_910_XM_016086676.2_219_TPlot.pdf	32.684	39.6024	-0.277003	down	0.4158	0.417305	yes	GO:0006605(protein targeting);GO:0015197(peptide transporter activity);GO:0071705(nitrogen compound transport);GO:0046907(intracellular transport);GO:0071702(organic substance transport);GO:0022857(transmembrane transporter activity);GO:0005215(transporter activity);GO:0006886(intracellular protein transport);GO:0045184(establishment of protein localization);GO:0051649(establishment of localizati…	ko04141(Protein processing in endoplasmic reticulum);ko03060(Protein export);ko04145(Phagosome)
PC-3p-13278_910	XM_016086677.2	208	226	219	-37	-26	0.702703	8.5	2-7,225-220;10-21,219-208	1-1,226-226[UP5];8-9,x-x[BULq]	((((((((((((--((((((.&.))))))..))))))))))))	GCCAAGGACAGC--GUCAGGC&UUUUGGCAAGCUGUUCUUGGC	1	32.684	4	0.999156	Output/R8h/cleaveLand_result/t_plot/PC-3p-13278_910_XM_016086677.2_219_TPlot.pdf	3	118.807	3	0.362294	Output/R0h/cleaveLand_result/t_plot/PC-3p-13278_910_XM_016086677.2_219_TPlot.pdf	32.684	118.807	-1.86197	down	2.6057e-12	1.10202e-11	yes	GO:0006605(protein targeting);GO:0015197(peptide transporter activity);GO:0071705(nitrogen compound transport);GO:0046907(intracellular transport);GO:0071702(organic substance transport);GO:0022857(transmembrane transporter activity);GO:0005215(transporter activity);GO:0006886(intracellular protein transport);GO:0045184(establishment of protein localization);GO:0051649(establishment of localizati…	ko04141(Protein processing in endoplasmic reticulum);ko03060(Protein export);ko04145(Phagosome)
PC-3p-13278_910	XM_016087060.2	332	366	347	-37	-24.8	0.67027	26.5	1-8,366-359;9-17,348-340;18-21,335-332	x-x,358-349[BULt];x-x,339-336[BULt]	((((....(((((((((..........((((((((&))))))))----------)))))))))----))))	GCCACAGAGGAACAGCUUAUUGAAAUCUGCCAGGA&UUUUGGCA----------AGCUGUUCU----UGGC	2	65.368	2	0.999524	Output/R8h/cleaveLand_result/t_plot/PC-3p-13278_910_XM_016087060.2_347_TPlot.pdf	0	0	NA	NA	NA	65.368	0	Inf	up	6.2072e-16	2.71719e-15	yes	GO:1901360(organic cyclic compound metabolic process);GO:0031124(mRNA 3'-end processing);GO:0044424(intracellular part);GO:0043170(macromolecule metabolic process);GO:0005634(nucleus);GO:0044238(primary metabolic process);GO:0000166(nucleotide binding);GO:0006397(mRNA processing);GO:0036094(small molecule binding);GO:0006139(nucleobase-containing compound metabolic process);GO:0031974(membrane-en…	ko03015(mRNA surveillance pathway)
PC-3p-13278_910	XM_016088238.2	618	649	629	-37	-24.4	0.659459	24.5	2-6,648-644;7-8,640-639;9-21,630-618	1-1,649-649[UP5];x-x,643-641[BULt];x-x,638-631[BULt]	(((((((((((((........((...(((((.&.)))))---))--------)))))))))))))	GCCAAGAGCAGCUAUACAUUAUGUAACCAGAG&UUUUGG---CA--------AGCUGUUCUUGGC	2	65.368	3	0.948342	Output/R8h/cleaveLand_result/t_plot/PC-3p-13278_910_XM_016088238.2_629_TPlot.pdf	1	39.6024	4	1	Output/R0h/cleaveLand_result/t_plot/PC-3p-13278_910_XM_016088238.2_629_TPlot.pdf	65.368	39.6024	0.722997	up	0.011907	0.0127886	yes	NA	ko04141(Protein processing in endoplasmic reticulum);ko00510(N-Glycan biosynthesis);ko01100(Metabolic pathways)
PC-3p-13278_910	XM_016088516.2	389	410	400	-37	-24.7	0.667568	9	2-5,409-406;6-12,404-398;14-16,396-394;19-21,391-389	1-1,410-410[UP5];x-x,405-405[BULt];13-13,397-397[SIL];17-18,393-392[SIL]	(((..(((.(((((((.((((.&.))))-))))))).)))..)))	GCCUUGAAGGGCUUGCACAGGC&UUUUG-GCAAGCUGUUCUUGGC	0	0	NA	NA	NA	1	39.6024	4	1	Output/R0h/cleaveLand_result/t_plot/PC-3p-13278_910_XM_016088516.2_400_TPlot.pdf	0	39.6024	-Inf	down	3.1118e-10	6.0287e-10	yes	GO:0046872(metal ion binding);GO:0044424(intracellular part);GO:0009059(macromolecule biosynthetic process);GO:0043170(macromolecule metabolic process);GO:0044464(cell part);GO:0005622(intracellular);GO:0043167(ion binding);GO:0009058(biosynthetic process);GO:0000287(magnesium ion binding);GO:0010467(gene expression);GO:0043168(anion binding);GO:0006432(phenylalanyl-tRNA aminoacylation);GO:004648…	ko00970(Aminoacyl-tRNA biosynthesis)
PC-3p-13278_910	XM_016088529.2	405	426	416	-37	-24.7	0.667568	9	2-5,425-422;6-12,420-414;14-16,412-410;19-21,407-405	1-1,426-426[UP5];x-x,421-421[BULt];13-13,413-413[SIL];17-18,409-408[SIL]	(((..(((.(((((((.((((.&.))))-))))))).)))..)))	GCCUUGAAGGGCUUGCACAGGC&UUUUG-GCAAGCUGUUCUUGGC	0	0	NA	NA	NA	1	39.6024	4	1	Output/R0h/cleaveLand_result/t_plot/PC-3p-13278_910_XM_016088529.2_416_TPlot.pdf	0	39.6024	-Inf	down	3.1118e-10	6.0287e-10	yes	GO:0046872(metal ion binding);GO:0044424(intracellular part);GO:0009059(macromolecule biosynthetic process);GO:0043170(macromolecule metabolic process);GO:0044464(cell part);GO:0005622(intracellular);GO:0043167(ion binding);GO:0009058(biosynthetic process);GO:0000287(magnesium ion binding);GO:0010467(gene expression);GO:0043168(anion binding);GO:0006432(phenylalanyl-tRNA aminoacylation);GO:004648…	ko00970(Aminoacyl-tRNA biosynthesis)
PC-3p-13278_910	XM_016089006.2	440	464	455	-37	-24.2	0.654054	10	1-12,464-453;14-14,451-451;15-21,446-440	13-13,452-452[SIL];x-x,450-447[BULt]	(((((((....(.((((((((((((&)))))))))))).)----)))))))	GCUGAGGUUUUGGAGCUUGCCGGGA&UUUUGGCAAGCUGU----UCUUGGC	4	130.736	1	0.468034	Output/R8h/cleaveLand_result/t_plot/PC-3p-13278_910_XM_016089006.2_455_TPlot.pdf	0	0	NA	NA	NA	130.736	0	Inf	up	2.8161e-30	6.66857e-29	yes	GO:0071840(cellular component organization or biogenesis);GO:0044815(DNA packaging complex);GO:0010629(negative regulation of gene expression);GO:0050794(regulation of cellular process);GO:0045934(negative regulation of nucleobase-containing compound metabolic process);GO:0006342(chromatin silencing);GO:0006996(organelle organization);GO:0005623(cell);GO:0051171(regulation of nitrogen compound me…	NA
PC-3p-13278_910	XM_016089263.2	1655	1679	1667	-37	-24.9	0.672973	16	5-8,1675-1672;9-12,1668-1665;13-21,1663-1655	1-4,1679-1676[UP5];x-x,1671-1669[BULt];x-x,1664-1664[BULt]	(((((((((.((((...((((....&....))))---))))-)))))))))	GCCAAGGGCAAGCUAAGUGCCUGUG&UUUUGGCA---AGCU-GUUCUUGGC	4	130.736	2	0.997414	Output/R8h/cleaveLand_result/t_plot/PC-3p-13278_910_XM_016089263.2_1667_TPlot.pdf	3	118.807	2	0.987976	Output/R0h/cleaveLand_result/t_plot/PC-3p-13278_910_XM_016089263.2_1667_TPlot.pdf	130.736	118.807	0.138035	up	0.45014	0.45105	yes	GO:0031224(intrinsic component of membrane);GO:0044425(membrane part);GO:0016020(membrane);GO:0016021(integral component of membrane);GO:0005488(binding);GO:0008289(lipid binding)	NA
PC-3p-13278_910	XM_016089500.2	632	653	644	-37	-24.9	0.672973	11	5-10,649-644;11-19,642-634	1-4,653-650[UP5];x-x,643-643[BULt];20-21,633-632[UP3]	..(((((((((.((((((....&....))))))-)))))))))..	CACAAGAACAGACUUGCCUCCU&UUUUGGCAAG-CUGUUCUUGGC	2	65.368	3	0.846593	Output/R8h/cleaveLand_result/t_plot/PC-3p-13278_910_XM_016089500.2_644_TPlot.pdf	0	0	NA	NA	NA	65.368	0	Inf	up	6.2072e-16	2.71719e-15	yes	GO:0098869(cellular oxidant detoxification);GO:0043167(ion binding);GO:0044237(cellular metabolic process);GO:0044248(cellular catabolic process);GO:0072593(reactive oxygen species metabolic process);GO:0009987(cellular process);GO:0050896(response to stimulus);GO:0006950(response to stress);GO:0042744(hydrogen peroxide catabolic process);GO:0005488(binding);GO:0042743(hydrogen peroxide metabolic…	ko00940(Phenylpropanoid biosynthesis);ko01110(Biosynthesis of secondary metabolites);ko01100(Metabolic pathways)
PC-3p-13278_910	XM_016089653.2	1757	1776	1767	-37	-25.5	0.689189	3.5	2-12,1775-1765;14-21,1764-1757	1-1,1776-1776[UP5];13-13,x-x[BULq]	((((((((-(((((((((((.&.))))))))))).))))))))	GCUAAGAA-AGCUUGUCAAAC&UUUUGGCAAGCUGUUCUUGGC	2	65.368	2	0.98005	Output/R8h/cleaveLand_result/t_plot/PC-3p-13278_910_XM_016089653.2_1767_TPlot.pdf	0	0	NA	NA	NA	65.368	0	Inf	up	6.2072e-16	2.71719e-15	yes	GO:0016021(integral component of membrane);GO:0016020(membrane);GO:0031224(intrinsic component of membrane);GO:0003824(catalytic activity);GO:0016787(hydrolase activity);GO:0044425(membrane part)	ko00240(Pyrimidine metabolism);ko00230(Purine metabolism)
PC-3p-13278_910	XM_016089706.2	1122	1141	1132	-37	-25.1	0.678378	8	2-4,1140-1138;6-17,1136-1125;19-21,1124-1122	1-1,1141-1141[UP5];5-5,1137-1137[SIL];18-18,x-x[BULq]	(((-((((((((((((.(((.&.))).)))))))))))).)))	GCC-AGAACAGUUUGUGGAGC&UUUUGGCAAGCUGUUCUUGGC	1	32.684	4	1	Output/R8h/cleaveLand_result/t_plot/PC-3p-13278_910_XM_016089706.2_1132_TPlot.pdf	0	0	NA	NA	NA	32.684	0	Inf	up	1.084e-08	1.2485e-08	yes	GO:0016788(hydrolase activity, acting on ester bonds);GO:0006796(phosphate-containing compound metabolic process);GO:0003824(catalytic activity);GO:0044237(cellular metabolic process);GO:0008252(nucleotidase activity);GO:0016791(phosphatase activity);GO:0006793(phosphorus metabolic process);GO:0016787(hydrolase activity);GO:0042578(phosphoric ester hydrolase activity);GO:0008253(5'-nucleotidase a…	ko01110(Biosynthesis of secondary metabolites);ko00230(Purine metabolism);ko00760(Nicotinate and nicotinamide metabolism);ko01100(Metabolic pathways);ko00240(Pyrimidine metabolism)
PC-3p-13278_910	XM_016092496.1	549	571	560	-37	-25.9	0.7	9.5	3-8,569-564;9-14,561-556;16-21,554-549	1-2,571-570[UP5];x-x,563-562[BULt];15-15,555-555[SIL]	((((((.((((((..((((((..&..))))))--)))))).))))))	GCCAAGUGCAGUUAAUGCCAAUG&UUUUGGCA--AGCUGUUCUUGGC	0	0	NA	NA	NA	1	39.6024	4	0.998075	Output/R0h/cleaveLand_result/t_plot/PC-3p-13278_910_XM_016092496.1_560_TPlot.pdf	0	39.6024	-Inf	down	3.1118e-10	6.0287e-10	yes	GO:0043650(dicarboxylic acid biosynthetic process);GO:0043648(dicarboxylic acid metabolic process);GO:0044283(small molecule biosynthetic process);GO:0009089(lysine biosynthetic process via diaminopimelate);GO:0005737(cytoplasm);GO:0006807(nitrogen compound metabolic process);GO:0008152(metabolic process);GO:0009987(cellular process);GO:0046394(carboxylic acid biosynthetic process);GO:0005622(int…	ko01230(Biosynthesis of amino acids);ko00261(Monobactam biosynthesis);ko01110(Biosynthesis of secondary metabolites);ko00300(Lysine biosynthesis);ko01100(Metabolic pathways)
PC-3p-13278_910	XM_016092520.2	1305	1331	1322	-37	-26.4	0.713514	13	4-14,1328-1318;15-21,1311-1305	1-3,1331-1329[UP5];x-x,1317-1312[BULt]	(((((((......(((((((((((...&...)))))))))))------)))))))	GCCAAGAAGUGCAACGGUUUGCCAUUA&UUUUGGCAAGCUGU------UCUUGGC	1	32.684	4	0.992412	Output/R8h/cleaveLand_result/t_plot/PC-3p-13278_910_XM_016092520.2_1322_TPlot.pdf	1	39.6024	4	0.982509	Output/R0h/cleaveLand_result/t_plot/PC-3p-13278_910_XM_016092520.2_1322_TPlot.pdf	32.684	39.6024	-0.277003	down	0.4158	0.417305	yes	NA	NA
PC-3p-13278_910	XM_016094590.2	5090	5118	5101	-37	-24.8	0.67027	18.5	1-9,5118-5110;10-19,5101-5092	x-x,5109-5102[BULt];20-21,5091-5090[UP3]	..((((((((((........(((((((((&)))))))))--------))))))))))..	AACAAGAGCAGCAGCAAGUAUUGCCAAAA&UUUUGGCAA--------GCUGUUCUUGGC	2	65.368	3	0.877035	Output/R8h/cleaveLand_result/t_plot/PC-3p-13278_910_XM_016094590.2_5101_TPlot.pdf	0	0	NA	NA	NA	65.368	0	Inf	up	6.2072e-16	2.71719e-15	yes	GO:0070887(cellular response to chemical stimulus);GO:0071365(cellular response to auxin stimulus);GO:1901363(heterocyclic compound binding);GO:0005634(nucleus);GO:0051716(cellular response to stimulus);GO:0060255(regulation of macromolecule metabolic process);GO:0031326(regulation of cellular biosynthetic process);GO:0042221(response to chemical);GO:0051252(regulation of RNA metabolic process);G…	ko04075(Plant hormone signal transduction)
PC-3p-13278_910	XM_016095558.2	1381	1402	1394	-37	-25.3	0.683784	8	1-7,1402-1396;10-18,1394-1386;19-21,1383-1381	8-9,1395-1395[AILq];x-x,1385-1384[BULt]	(((..(((((((((.-(((((((&)))))))..)))))))))--)))	GCCUCAAGAACAGUG-GCCAGAA&UUUUGGCAAGCUGUUCUU--GGC	0	0	NA	NA	NA	2	79.2048	2	0.959423	Output/R0h/cleaveLand_result/t_plot/PC-3p-13278_910_XM_016095558.2_1394_TPlot.pdf	0	79.2048	-Inf	down	5.5905e-19	3.89431e-18	yes	GO:0016787(hydrolase activity);GO:0003824(catalytic activity);GO:0008152(metabolic process)	ko04075(Plant hormone signal transduction)
PC-3p-13278_910	XM_016097176.2	1003	1028	1020	-37	-25.4	0.686486	9.5	1-9,1028-1020;11-17,1019-1013;18-21,1006-1003	10-10,x-x[BULq];x-x,1012-1007[BULt]	((((......(((((((-(((((((((&))))))))).)))))))------))))	GCCACAUAAUAGAGCAG-UUGCCAGAA&UUUUGGCAAGCUGUUCU------UGGC	0	0	NA	NA	NA	1	39.6024	4	0.999959	Output/R0h/cleaveLand_result/t_plot/PC-3p-13278_910_XM_016097176.2_1020_TPlot.pdf	0	39.6024	-Inf	down	3.1118e-10	6.0287e-10	yes	GO:0043226(organelle);GO:0071822(protein complex subunit organization);GO:0009534(chloroplast thylakoid);GO:0009657(plastid organization);GO:0044424(intracellular part);GO:0031975(envelope);GO:0009725(response to hormone);GO:0016020(membrane);GO:0055035(plastid thylakoid membrane);GO:0022607(cellular component assembly);GO:0009579(thylakoid);GO:0031976(plastid thylakoid);GO:0070271(protein comple…	NA
PC-3p-13278_910	XM_016097785.2	533	551	543	-37	-24.4	0.659459	11.5	5-8,547-544;10-14,543-539;16-21,538-533	1-4,551-548[UP5];9-9,x-x[BULq];15-15,x-x[BULq]	((((((-(((((-((((....&....)))).))))).))))))	GCCAAG-GCGGC-UGCCGUGG&UUUUGGCAAGCUGUUCUUGGC	0	0	NA	NA	NA	2	79.2048	2	0.999414	Output/R0h/cleaveLand_result/t_plot/PC-3p-13278_910_XM_016097785.2_543_TPlot.pdf	0	79.2048	-Inf	down	5.5905e-19	3.89431e-18	yes	NA	NA
PC-3p-13278_910	XM_016099025.2	215	235	226	-37	-25	0.675676	8.5	3-12,233-224;14-21,222-215	1-2,235-234[UP5];13-13,223-223[SIL]	((((((((.((((((((((..&..)))))))))).))))))))	GCUAGGAGGAGCUUGUUAGCU&UUUUGGCAAGCUGUUCUUGGC	0	0	NA	NA	NA	1	39.6024	4	0.999999	Output/R0h/cleaveLand_result/t_plot/PC-3p-13278_910_XM_016099025.2_226_TPlot.pdf	0	39.6024	-Inf	down	3.1118e-10	6.0287e-10	yes	GO:0016829(lyase activity);GO:0046872(metal ion binding);GO:0009057(macromolecule catabolic process);GO:0071704(organic substance metabolic process);GO:0005975(carbohydrate metabolic process);GO:0043170(macromolecule metabolic process);GO:0016837(carbon-oxygen lyase activity, acting on polysaccharides);GO:0043169(cation binding);GO:0000272(polysaccharide catabolic process);GO:0016835(carbon-oxyge…	ko00040(Pentose and glucuronate interconversions)
PC-3p-13278_910	XM_016100284.2	545	566	557	-37	-24.5	0.662162	11.5	5-10,562-557;11-20,555-546	1-4,566-563[UP5];x-x,556-556[BULt];21-21,545-545[UP3]	.((((((((((.((((((....&....))))))-)))))))))).	UUCGAGGACAGCCUUGCCGUUC&UUUUGGCAAG-CUGUUCUUGGC	1	32.684	4	1	Output/R8h/cleaveLand_result/t_plot/PC-3p-13278_910_XM_016100284.2_557_TPlot.pdf	0	0	NA	NA	NA	32.684	0	Inf	up	1.084e-08	1.2485e-08	yes	GO:0016740(transferase activity);GO:0016020(membrane);GO:0097367(carbohydrate derivative binding);GO:0006796(phosphate-containing compound metabolic process);GO:0051716(cellular response to stimulus);GO:0043170(macromolecule metabolic process);GO:0044238(primary metabolic process);GO:0006464(cellular protein modification process);GO:0043167(ion binding);GO:0009931(calcium-dependent protein serine…	ko04626(Plant-pathogen interaction)
PC-3p-13278_910	XM_016100408.2	1432	1453	1443	-37	-25.7	0.694595	7	3-5,1451-1449;6-18,1447-1435;20-21,1433-1432	1-2,1453-1452[UP5];x-x,1448-1448[BULt];19-19,1434-1434[SIL]	((.(((((((((((((.(((..&..)))-))))))))))))).))	GCAAAGAACGGCUUGCUCAACU&UUUUG-GCAAGCUGUUCUUGGC	1	32.684	4	0.999833	Output/R8h/cleaveLand_result/t_plot/PC-3p-13278_910_XM_016100408.2_1443_TPlot.pdf	0	0	NA	NA	NA	32.684	0	Inf	up	1.084e-08	1.2485e-08	yes	NA	NA
PC-3p-13278_910	XM_016100409.2	1430	1451	1441	-37	-25.7	0.694595	7	3-5,1449-1447;6-18,1445-1433;20-21,1431-1430	1-2,1451-1450[UP5];x-x,1446-1446[BULt];19-19,1432-1432[SIL]	((.(((((((((((((.(((..&..)))-))))))))))))).))	GCAAAGAACGGCUUGCUCAACU&UUUUG-GCAAGCUGUUCUUGGC	1	32.684	4	0.999918	Output/R8h/cleaveLand_result/t_plot/PC-3p-13278_910_XM_016100409.2_1441_TPlot.pdf	0	0	NA	NA	NA	32.684	0	Inf	up	1.084e-08	1.2485e-08	yes	NA	NA
PC-3p-13278_910	XM_016101909.2	457	478	469	-37	-25.6	0.691892	8.5	3-8,476-471;10-17,469-462;18-21,460-457	1-2,478-477[UP5];9-9,470-470[SIL];x-x,461-461[BULt]	((((.((((((((.((((((..&..)))))).))))))))-))))	GCCAGAGAGCAGCGUGUCGACG&UUUUGGCAAGCUGUUCU-UGGC	0	0	NA	NA	NA	1	39.6024	4	0.999856	Output/R0h/cleaveLand_result/t_plot/PC-3p-13278_910_XM_016101909.2_469_TPlot.pdf	0	39.6024	-Inf	down	3.1118e-10	6.0287e-10	yes	GO:0009987(cellular process);GO:0006048(UDP-N-acetylglucosamine biosynthetic process);GO:1901135(carbohydrate derivative metabolic process);GO:0071704(organic substance metabolic process);GO:0044249(cellular biosynthetic process);GO:1901360(organic cyclic compound metabolic process);GO:0044464(cell part);GO:0008152(metabolic process);GO:0006725(cellular aromatic compound metabolic process);GO:000…	ko01100(Metabolic pathways);ko00520(Amino sugar and nucleotide sugar metabolism)
PC-3p-13278_910	XM_016105742.2	723	747	734	-37	-25.56	0.690811	19	4-7,744-741;10-21,734-723	1-3,747-745[UP5];8-9,740-735[AILt]	((((((((((((......((((...&...))))----..))))))))))))	GCCAGGAGCAGUCCUGUGGCCACCG&UUUUGGC----AAGCUGUUCUUGGC	2	65.368	3	0.667655	Output/R8h/cleaveLand_result/t_plot/PC-3p-13278_910_XM_016105742.2_734_TPlot.pdf	1	39.6024	4	0.999904	Output/R0h/cleaveLand_result/t_plot/PC-3p-13278_910_XM_016105742.2_734_TPlot.pdf	65.368	39.6024	0.722997	up	0.011907	0.0127886	yes	NA	NA
PC-3p-13278_910	XM_016107255.2	481	501	492	-37	-24.7	0.667568	6.5	1-9,501-493;11-18,491-484;21-21,481-481	10-10,492-492[SIL];19-20,483-482[SIL]	(..((((((((.(((((((((&))))))))).))))))))..)	GAAAAGGGCAGGUUGCCAGAG&UUUUGGCAAGCUGUUCUUGGC	1	32.684	4	1	Output/R8h/cleaveLand_result/t_plot/PC-3p-13278_910_XM_016107255.2_492_TPlot.pdf	0	0	NA	NA	NA	32.684	0	Inf	up	1.084e-08	1.2485e-08	yes	GO:0006793(phosphorus metabolic process);GO:0032555(purine ribonucleotide binding);GO:0016740(transferase activity);GO:0008152(metabolic process);GO:1901363(heterocyclic compound binding);GO:0016310(phosphorylation);GO:0006796(phosphate-containing compound metabolic process);GO:0006468(protein phosphorylation);GO:0035639(purine ribonucleoside triphosphate binding);GO:1901265(nucleoside phosphate …	NA
PC-3p-13278_910	XM_016107779.2	741	760	751	-37	-25.3	0.683784	10	5-8,756-753;10-17,751-744;19-21,743-741	1-4,760-757[UP5];9-9,752-752[SIL];18-18,x-x[BULq]	(((-((((((((.((((....&....)))).)))))))).)))	GCC-AGAACAGCGUGCCCUUC&UUUUGGCAAGCUGUUCUUGGC	0	0	NA	NA	NA	1	39.6024	4	0.999978	Output/R0h/cleaveLand_result/t_plot/PC-3p-13278_910_XM_016107779.2_751_TPlot.pdf	0	39.6024	-Inf	down	3.1118e-10	6.0287e-10	yes	GO:0009987(cellular process);GO:0016021(integral component of membrane);GO:0016192(vesicle-mediated transport);GO:0044425(membrane part);GO:0098796(membrane protein complex);GO:0044444(cytoplasmic part);GO:0022406(membrane docking);GO:0016020(membrane);GO:0071702(organic substance transport);GO:0008104(protein localization);GO:0016043(cellular component organization);GO:0046907(intracellular tran…	ko04130(SNARE interactions in vesicular transport);ko04145(Phagosome)
PC-3p-13278_910	XM_016108263.2	529	550	540	-37	-25.1	0.678378	7.5	1-7,550-544;9-12,541-538;14-21,536-529	8-8,543-542[AILt];13-13,537-537[SIL]	((((((((.((((..(((((((&)))))))-.)))).))))))))	GCCGGGAAAAGCUCAGCCAGAG&UUUUGGC-AAGCUGUUCUUGGC	5	163.42	2	0.995259	Output/R8h/cleaveLand_result/t_plot/PC-3p-13278_910_XM_016108263.2_540_TPlot.pdf	4	158.41	2	0.981145	Output/R0h/cleaveLand_result/t_plot/PC-3p-13278_910_XM_016108263.2_540_TPlot.pdf	163.42	158.41	0.0449256	up	0.78	0.780382	yes	NA	ko04075(Plant hormone signal transduction);ko01100(Metabolic pathways);ko01230(Biosynthesis of amino acids);ko01110(Biosynthesis of secondary metabolites);ko00020(Citrate cycle (TCA cycle));ko00630(Glyoxylate and dicarboxylate metabolism);ko01210(2-Oxocarboxylic acid metabolism);ko01200(Carbon metabolism);ko04016(MAPK signaling pathway - plant)
PC-3p-13278_910	XM_016109247.2	718	743	730	-37	-24.26	0.655676	15.5	1-7,743-737;10-19,730-721;20-21,719-718	8-9,736-731[AILt];x-x,720-720[BULt]	((.((((((((((......(((((((&)))))))----..))))))))))-))	GCGCAAGGACGGCCUUGUCGCCAAGA&UUUUGGC----AAGCUGUUCUUG-GC	1	32.684	4	1	Output/R8h/cleaveLand_result/t_plot/PC-3p-13278_910_XM_016109247.2_730_TPlot.pdf	0	0	NA	NA	NA	32.684	0	Inf	up	1.084e-08	1.2485e-08	yes	GO:0050793(regulation of developmental process);GO:0034645(cellular macromolecule biosynthetic process);GO:1901360(organic cyclic compound metabolic process);GO:0009059(macromolecule biosynthetic process);GO:2000243(positive regulation of reproductive process);GO:0006464(cellular protein modification process);GO:0055029(nuclear DNA-directed RNA polymerase complex);GO:0044260(cellular macromolecul…	NA
PC-3p-13278_910	XM_016110039.2	1313	1332	1323	-37	-25.3	0.683784	12	6-11,1327-1322;13-21,1321-1313	1-5,1332-1328[UP5];12-12,x-x[BULq]	(((((((((-((((((.....&.....)))))).)))))))))	GCCGGGAAC-GCUUGCGUGAG&UUUUGGCAAGCUGUUCUUGGC	2	65.368	2	0.987457	Output/R8h/cleaveLand_result/t_plot/PC-3p-13278_910_XM_016110039.2_1323_TPlot.pdf	0	0	NA	NA	NA	65.368	0	Inf	up	6.2072e-16	2.71719e-15	yes	GO:0005488(binding);GO:0046872(metal ion binding);GO:0010556(regulation of macromolecule biosynthetic process);GO:1903506(regulation of nucleic acid-templated transcription);GO:0060255(regulation of macromolecule metabolic process);GO:0031323(regulation of cellular metabolic process);GO:0019219(regulation of nucleobase-containing compound metabolic process);GO:0031326(regulation of cellular biosy…	NA
PC-3p-13278_910	XM_016111091.2	293	314	305	-37	-25.3	0.683784	9	4-13,311-302;14-20,300-294	1-3,314-312[UP5];x-x,301-301[BULt];21-21,293-293[UP3]	.(((((((.((((((((((...&...))))))))))-))))))).	ACCGAGGACCAGCUUGUCACCC&UUUUGGCAAGCUG-UUCUUGGC	3	98.052	2	0.988274	Output/R8h/cleaveLand_result/t_plot/PC-3p-13278_910_XM_016111091.2_305_TPlot.pdf	3	118.807	2	0.963079	Output/R0h/cleaveLand_result/t_plot/PC-3p-13278_910_XM_016111091.2_305_TPlot.pdf	98.052	118.807	-0.277003	down	0.15869	0.168471	yes	GO:0004471(malate dehydrogenase (decarboxylating) (NAD+) activity);GO:0050662(coenzyme binding);GO:0036094(small molecule binding);GO:0006082(organic acid metabolic process);GO:1901363(heterocyclic compound binding);GO:0016614(oxidoreductase activity, acting on CH-OH group of donors);GO:1901265(nucleoside phosphate binding);GO:0004470(malic enzyme activity);GO:0043648(dicarboxylic acid metabolic …	ko01100(Metabolic pathways);ko00620(Pyruvate metabolism);ko01200(Carbon metabolism);ko00710(Carbon fixation in photosynthetic organisms)
PC-3p-13278_910	XM_016111091.2	608	630	621	-37	-24.2	0.654054	9.5	1-12,630-619;13-15,616-614;18-21,611-608	x-x,618-617[BULt];16-17,613-612[SIL]	((((..(((..((((((((((((&))))))))))))--)))..))))	GCCGUCGGCGAGGCUUGCCAGAA&UUUUGGCAAGCU--GUUCUUGGC	0	0	NA	NA	NA	2	79.2048	3	0.88277	Output/R0h/cleaveLand_result/t_plot/PC-3p-13278_910_XM_016111091.2_621_TPlot.pdf	0	79.2048	-Inf	down	5.5905e-19	3.89431e-18	yes	GO:0004471(malate dehydrogenase (decarboxylating) (NAD+) activity);GO:0050662(coenzyme binding);GO:0036094(small molecule binding);GO:0006082(organic acid metabolic process);GO:1901363(heterocyclic compound binding);GO:0016614(oxidoreductase activity, acting on CH-OH group of donors);GO:1901265(nucleoside phosphate binding);GO:0004470(malic enzyme activity);GO:0043648(dicarboxylic acid metabolic …	ko01100(Metabolic pathways);ko00620(Pyruvate metabolism);ko01200(Carbon metabolism);ko00710(Carbon fixation in photosynthetic organisms)
PC-3p-13278_910	XM_016112075.2	930	950	941	-37	-25.3	0.683784	10.5	5-12,946-939;15-21,936-930	1-4,950-947[UP5];13-14,938-937[SIL]	(((((((..((((((((....&....))))))))..)))))))	GCCAGGAUGAGCUUGCUCUUU&UUUUGGCAAGCUGUUCUUGGC	1	32.684	4	0.999998	Output/R8h/cleaveLand_result/t_plot/PC-3p-13278_910_XM_016112075.2_941_TPlot.pdf	0	0	NA	NA	NA	32.684	0	Inf	up	1.084e-08	1.2485e-08	yes	GO:0016021(integral component of membrane);GO:0044425(membrane part);GO:0016020(membrane);GO:0031224(intrinsic component of membrane)	ko00240(Pyrimidine metabolism);ko01100(Metabolic pathways)
PC-3p-13278_910	XM_016112376.2	2604	2626	2617	-37	-25	0.675676	8.5	2-10,2625-2617;12-17,2616-2611;18-21,2607-2604	1-1,2626-2626[UP5];11-11,x-x[BULq];x-x,2610-2608[BULt]	((((...((((((-(((((((((.&.))))))))).))))))---))))	GCCAAUGGGAACA-CUUGCCGAGG&UUUUGGCAAGCUGUUCU---UGGC	1	32.684	4	1	Output/R8h/cleaveLand_result/t_plot/PC-3p-13278_910_XM_016112376.2_2617_TPlot.pdf	0	0	NA	NA	NA	32.684	0	Inf	up	1.084e-08	1.2485e-08	yes	NA	NA
PC-3p-13278_910	XM_016112574.2	939	959	950	-37	-26.3	0.710811	7	2-4,958-956;6-21,954-939	1-1,959-959[UP5];5-5,955-955[SIL]	((((((((((((((((.(((.&.))).))))))))))))))))	GUUGAGGACAGCUUGUGAGAG&UUUUGGCAAGCUGUUCUUGGC	1	32.684	4	0.995022	Output/R8h/cleaveLand_result/t_plot/PC-3p-13278_910_XM_016112574.2_950_TPlot.pdf	0	0	NA	NA	NA	32.684	0	Inf	up	1.084e-08	1.2485e-08	yes	GO:0005488(binding);GO:0030554(adenyl nucleotide binding);GO:0097159(organic cyclic compound binding);GO:0043167(ion binding);GO:1901265(nucleoside phosphate binding);GO:0043168(anion binding);GO:1901363(heterocyclic compound binding);GO:0017076(purine nucleotide binding);GO:0036094(small molecule binding);GO:0032559(adenyl ribonucleotide binding);GO:0005524(ATP binding);GO:0097367(carbohydrate d…	ko04141(Protein processing in endoplasmic reticulum);ko04144(Endocytosis);ko03040(Spliceosome)
PC-3p-13278_910	XM_016112602.2	964	985	976	-37	-24.2	0.654054	7.5	1-4,985-982;6-19,980-967;20-21,965-964	5-5,981-981[SIL];x-x,966-966[BULt]	((.((((((((((((((.((((&)))).))))))))))))))-))	GCAUAGGAACAGUUUGUGGAAG&UUUUGGCAAGCUGUUCUUG-GC	1	32.684	4	1	Output/R8h/cleaveLand_result/t_plot/PC-3p-13278_910_XM_016112602.2_976_TPlot.pdf	0	0	NA	NA	NA	32.684	0	Inf	up	1.084e-08	1.2485e-08	yes	GO:0005996(monosaccharide metabolic process);GO:0044262(cellular carbohydrate metabolic process);GO:0006793(phosphorus metabolic process);GO:0016301(kinase activity);GO:0044281(small molecule metabolic process);GO:0016740(transferase activity);GO:0044238(primary metabolic process);GO:0044237(cellular metabolic process);GO:0016310(phosphorylation);GO:0019321(pentose metabolic process);GO:0016773(p…	ko00500(Starch and sucrose metabolism);ko00030(Pentose phosphate pathway)
PC-3p-13278_910	XM_016113911.2	275	299	290	-37	-27.8	0.751351	8.5	1-12,299-288;14-14,286-286;15-21,281-275	13-13,287-287[SIL];x-x,285-282[BULt]	(((((((....(.((((((((((((&)))))))))))).)----)))))))	GCCGAGGUUCUGGAGCUUGCCGGAA&UUUUGGCAAGCUGU----UCUUGGC	1	32.684	4	0.844904	Output/R8h/cleaveLand_result/t_plot/PC-3p-13278_910_XM_016113911.2_290_TPlot.pdf	4	158.41	1	0.0324048	Output/R0h/cleaveLand_result/t_plot/PC-3p-13278_910_XM_016113911.2_290_TPlot.pdf	32.684	158.41	-2.277	down	9.4249e-20	1.09066e-18	yes	GO:0005634(nucleus);GO:0031323(regulation of cellular metabolic process);GO:0040029(regulation of gene expression, epigenetic);GO:0097159(organic cyclic compound binding);GO:0044428(nuclear part);GO:0071840(cellular component organization or biogenesis);GO:0016043(cellular component organization);GO:0000785(chromatin);GO:0000228(nuclear chromosome);GO:0006342(chromatin silencing);GO:0046982(prote…	NA
PC-3p-13278_910	XM_016115287.2	1591	1612	1603	-37	-24.7	0.667568	7	1-6,1612-1607;8-11,1605-1602;12-21,1600-1591	7-7,1606-1606[SIL];x-x,1601-1601[BULt]	((((((((((.((((.((((((&)))))).))))-))))))))))	GCCAAGGACAUGUUUUCCAGAG&UUUUGGCAAGC-UGUUCUUGGC	1	32.684	4	1	Output/R8h/cleaveLand_result/t_plot/PC-3p-13278_910_XM_016115287.2_1603_TPlot.pdf	0	0	NA	NA	NA	32.684	0	Inf	up	1.084e-08	1.2485e-08	yes	GO:0005996(monosaccharide metabolic process);GO:0019566(arabinose metabolic process);GO:0044281(small molecule metabolic process);GO:0008152(metabolic process);GO:0016787(hydrolase activity);GO:0004553(hydrolase activity, hydrolyzing O-glycosyl compounds);GO:0046373(L-arabinose metabolic process);GO:0071704(organic substance metabolic process);GO:0005975(carbohydrate metabolic process);GO:0046556…	ko00520(Amino sugar and nucleotide sugar metabolism)
PC-3p-13278_910	XM_016115446.2	240	258	251	-37	-24.9	0.672973	8.5	2-7,257-252;10-19,251-242;21-21,240-240	1-1,258-258[UP5];8-9,x-x[BULq];20-20,241-241[SIL]	(.((((((((((--((((((.&.))))))..)))))))))).)	GGCAAGAGCAGC--GCCGAGG&UUUUGGCAAGCUGUUCUUGGC	0	0	NA	NA	NA	2	79.2048	3	0.710917	Output/R0h/cleaveLand_result/t_plot/PC-3p-13278_910_XM_016115446.2_251_TPlot.pdf	0	79.2048	-Inf	down	5.5905e-19	3.89431e-18	yes	GO:0044464(cell part);GO:0006082(organic acid metabolic process);GO:0046872(metal ion binding);GO:0016740(transferase activity);GO:0050667(homocysteine metabolic process);GO:0006807(nitrogen compound metabolic process);GO:0000097(sulfur amino acid biosynthetic process);GO:0044272(sulfur compound biosynthetic process);GO:1901607(alpha-amino acid biosynthetic process);GO:0003824(catalytic activity)…	ko01100(Metabolic pathways);ko01230(Biosynthesis of amino acids);ko00270(Cysteine and methionine metabolism);ko01110(Biosynthesis of secondary metabolites);ko00450(Selenocompound metabolism)
PC-3p-13278_910	XM_016115883.2	804	825	816	-37	-24.7	0.667568	10	4-17,822-809;20-21,805-804	1-3,825-823[UP5];18-19,808-806[AILt]	((...((((((((((((((...&...))))))))))))))-..))	GCAAUGGAGCAGUUUGCCACCA&UUUUGGCAAGCUGUUCU-UGGC	0	0	NA	NA	NA	1	39.6024	4	1	Output/R0h/cleaveLand_result/t_plot/PC-3p-13278_910_XM_016115883.2_816_TPlot.pdf	0	39.6024	-Inf	down	3.1118e-10	6.0287e-10	yes	GO:0031224(intrinsic component of membrane);GO:0044425(membrane part);GO:0016020(membrane);GO:0016021(integral component of membrane)	NA
PC-3p-13278_910	XM_016116102.2	4555	4575	4566	-37	-24.7	0.667568	13.5	5-7,4571-4569;10-20,4566-4556	1-4,4575-4572[UP5];8-9,4568-4567[SIL];21-21,4555-4555[UP3]	.(((((((((((..(((....&....)))..))))))))))).	CCCAAGAGCGGCAGGCCCAAG&UUUUGGCAAGCUGUUCUUGGC	0	0	NA	NA	NA	1	39.6024	4	1	Output/R0h/cleaveLand_result/t_plot/PC-3p-13278_910_XM_016116102.2_4566_TPlot.pdf	0	39.6024	-Inf	down	3.1118e-10	6.0287e-10	yes	GO:1901363(heterocyclic compound binding);GO:0005488(binding);GO:0003723(RNA binding);GO:0097159(organic cyclic compound binding);GO:0003676(nucleic acid binding)	ko03013(RNA transport)
PC-3p-13278_910	XM_016116510.2	336	357	347	-37	-27.9	0.754054	6	2-7,356-351;8-15,349-342;17-21,340-336	1-1,357-357[UP5];x-x,350-350[BULt];16-16,341-341[SIL]	(((((.((((((((.((((((.&.))))))-)))))))).)))))	GCCGAAGACAGCUUCGCCAGAU&UUUUGGC-AAGCUGUUCUUGGC	2	65.368	2	0.462717	Output/R8h/cleaveLand_result/t_plot/PC-3p-13278_910_XM_016116510.2_347_TPlot.pdf	0	0	NA	NA	NA	65.368	0	Inf	up	6.2072e-16	2.71719e-15	yes	GO:0003824(catalytic activity)	NA
PC-3p-13278_910	XM_016116955.2	462	482	473	-37	-24.3	0.656757	9	2-9,481-474;12-21,471-462	1-1,482-482[UP5];10-11,473-472[SIL]	((((((((((..((((((((.&.))))))))..))))))))))	GUCGGGGACAAGUUGCCGGAG&UUUUGGCAAGCUGUUCUUGGC	19	620.996	2	0.999979	Output/R8h/cleaveLand_result/t_plot/PC-3p-13278_910_XM_016116955.2_473_TPlot.pdf	5	198.012	2	0.999656	Output/R0h/cleaveLand_result/t_plot/PC-3p-13278_910_XM_016116955.2_473_TPlot.pdf	620.996	198.012	1.649	up	1.8796e-49	1.24016e-47	yes	GO:0009057(macromolecule catabolic process);GO:0006807(nitrogen compound metabolic process);GO:0005576(extracellular region);GO:0043227(membrane-bounded organelle);GO:0009987(cellular process);GO:0016021(integral component of membrane);GO:0070011(peptidase activity, acting on L-amino acid peptides);GO:0009056(catabolic process);GO:0005622(intracellular);GO:0004197(cysteine-type endopeptidase acti…	ko04145(Phagosome)
PC-3p-13278_910	XM_016117284.2	2214	2237	2228	-37	-27.5	0.743243	8.5	3-14,2235-2224;15-16,2220-2219;18-21,2217-2214	1-2,2237-2236[UP5];x-x,2223-2221[BULt];17-17,2218-2218[SIL]	((((.((...((((((((((((..&..))))))))))))---)).))))	GCCAUGACAUGCGGCUUGCCAACC&UUUUGGCAAGCUGU---UCUUGGC	2	65.368	3	0.194919	Output/R8h/cleaveLand_result/t_plot/PC-3p-13278_910_XM_016117284.2_2228_TPlot.pdf	0	0	NA	NA	NA	65.368	0	Inf	up	6.2072e-16	2.71719e-15	yes	GO:0016757(transferase activity, transferring glycosyl groups);GO:0051704(multi-organism process);GO:0009311(oligosaccharide metabolic process);GO:0009877(nodulation);GO:0044419(interspecies interaction between organisms);GO:0044237(cellular metabolic process);GO:0008194(UDP-glycosyltransferase activity);GO:0046527(glucosyltransferase activity);GO:0005984(disaccharide metabolic process);GO:000815…	ko01100(Metabolic pathways);ko00500(Starch and sucrose metabolism)
PC-3p-13278_910	XM_016117292.2	1785	1809	1796	-37	-25.86	0.698919	13.5	1-9,1809-1801;12-21,1794-1785	10-11,1800-1795[AILt]	((((((((((......(((((((((&)))))))))----..))))))))))	GCCAGGAACAAAUUGAUUGCCAGAA&UUUUGGCAA----GCUGUUCUUGGC	1	32.684	4	0.999594	Output/R8h/cleaveLand_result/t_plot/PC-3p-13278_910_XM_016117292.2_1796_TPlot.pdf	1	39.6024	4	0.998457	Output/R0h/cleaveLand_result/t_plot/PC-3p-13278_910_XM_016117292.2_1796_TPlot.pdf	32.684	39.6024	-0.277003	down	0.4158	0.417305	yes	GO:0016020(membrane);GO:0016021(integral component of membrane);GO:0031224(intrinsic component of membrane);GO:0044425(membrane part)	ko01100(Metabolic pathways);ko00600(Sphingolipid metabolism)
PC-3p-13278_910	XM_016117984.2	537	557	548	-37	-25.5	0.689189	6	1-4,557-554;6-20,552-538	5-5,553-553[SIL];21-21,537-537[UP3]	.(((((((((((((((.((((&)))).))))))))))))))).	ACCAAGAAUGGCUUGCAGAAG&UUUUGGCAAGCUGUUCUUGGC	2	65.368	2	0.979749	Output/R8h/cleaveLand_result/t_plot/PC-3p-13278_910_XM_016117984.2_548_TPlot.pdf	1	39.6024	4	0.999931	Output/R0h/cleaveLand_result/t_plot/PC-3p-13278_910_XM_016117984.2_548_TPlot.pdf	65.368	39.6024	0.722997	up	0.011907	0.0127886	yes	GO:0003824(catalytic activity);GO:0043170(macromolecule metabolic process);GO:0019538(protein metabolic process);GO:0036094(small molecule binding);GO:0097367(carbohydrate derivative binding);GO:0017076(purine nucleotide binding);GO:0032555(purine ribonucleotide binding);GO:0005488(binding);GO:0043168(anion binding);GO:0044238(primary metabolic process);GO:0032553(ribonucleotide binding);GO:00163…	NA
PC-3p-13278_910	XM_016117985.2	536	556	547	-37	-25.5	0.689189	6	1-4,556-553;6-20,551-537	5-5,552-552[SIL];21-21,536-536[UP3]	.(((((((((((((((.((((&)))).))))))))))))))).	ACCAAGAAUGGCUUGCAGAAG&UUUUGGCAAGCUGUUCUUGGC	1	32.684	4	0.999993	Output/R8h/cleaveLand_result/t_plot/PC-3p-13278_910_XM_016117985.2_547_TPlot.pdf	0	0	NA	NA	NA	32.684	0	Inf	up	1.084e-08	1.2485e-08	yes	GO:0003824(catalytic activity);GO:0043170(macromolecule metabolic process);GO:0019538(protein metabolic process);GO:0036094(small molecule binding);GO:0097367(carbohydrate derivative binding);GO:0017076(purine nucleotide binding);GO:0032555(purine ribonucleotide binding);GO:0005488(binding);GO:0043168(anion binding);GO:0044238(primary metabolic process);GO:0032553(ribonucleotide binding);GO:00163…	NA
PC-3p-13278_910	XM_021124832.1	140	161	152	-37	-24.5	0.662162	6.5	1-10,161-152;12-14,150-148;15-21,146-140	11-11,151-151[SIL];x-x,147-147[BULt]	(((((((.(((.((((((((((&)))))))))).)))-)))))))	GCCGAGACACGAUUUGCCGAAA&UUUUGGCAAGCUGU-UCUUGGC	0	0	NA	NA	NA	1	39.6024	4	1	Output/R0h/cleaveLand_result/t_plot/PC-3p-13278_910_XM_021124832.1_152_TPlot.pdf	0	39.6024	-Inf	down	3.1118e-10	6.0287e-10	yes	GO:0036459(thiol-dependent ubiquitinyl hydrolase activity);GO:0016787(hydrolase activity);GO:0043412(macromolecule modification);GO:0043170(macromolecule metabolic process);GO:0071704(organic substance metabolic process);GO:0016579(protein deubiquitination);GO:1901565(organonitrogen compound catabolic process);GO:0044248(cellular catabolic process);GO:1901564(organonitrogen compound metabolic pro…	NA
PC-3p-13278_910	XM_021126125.1	288	309	299	-37	-25.8	0.697297	12	5-9,305-301;10-21,299-288	1-4,309-306[UP5];x-x,300-300[BULt]	((((((((((((.(((((....&....)))))-))))))))))))	GCCAGGAGCAGCUUUGUUCCUC&UUUUGGCAA-GCUGUUCUUGGC	1	32.684	4	0.999745	Output/R8h/cleaveLand_result/t_plot/PC-3p-13278_910_XM_021126125.1_299_TPlot.pdf	0	0	NA	NA	NA	32.684	0	Inf	up	1.084e-08	1.2485e-08	yes	NA	NA
PC-3p-13278_910	XM_021126602.1	1182	1199	1193	-37	-26.7	0.721622	7	1-6,1199-1194;10-21,1193-1182	7-9,x-x[BULq]	((((((((((((---((((((&))))))...))))))))))))	GCCAAGAACAGC---CCAGAA&UUUUGGCAAGCUGUUCUUGGC	2	65.368	3	0.310855	Output/R8h/cleaveLand_result/t_plot/PC-3p-13278_910_XM_021126602.1_1193_TPlot.pdf	1	39.6024	4	0.95613	Output/R0h/cleaveLand_result/t_plot/PC-3p-13278_910_XM_021126602.1_1193_TPlot.pdf	65.368	39.6024	0.722997	up	0.011907	0.0127886	yes	GO:0016020(membrane);GO:0016798(hydrolase activity, acting on glycosyl bonds);GO:0016021(integral component of membrane);GO:0006810(transport);GO:0008152(metabolic process);GO:0005215(transporter activity);GO:0044425(membrane part);GO:0102483(scopolin beta-glucosidase activity);GO:0003824(catalytic activity);GO:0071704(organic substance metabolic process);GO:0044238(primary metabolic process);GO:…	ko01110(Biosynthesis of secondary metabolites);ko00500(Starch and sucrose metabolism);ko01100(Metabolic pathways);ko00460(Cyanoamino acid metabolism);ko00940(Phenylpropanoid biosynthesis)
PC-3p-13278_910	XM_021128891.1	362	383	374	-37	-24.3	0.656757	8	2-15,382-369;16-18,367-365;20-21,363-362	1-1,383-383[UP5];x-x,368-368[BULt];19-19,364-364[SIL]	((.(((.((((((((((((((.&.))))))))))))))-))).))	GCGGAGAAGCGGUUUGCUGAAG&UUUUGGCAAGCUGUU-CUUGGC	0	0	NA	NA	NA	1	39.6024	4	1	Output/R0h/cleaveLand_result/t_plot/PC-3p-13278_910_XM_021128891.1_374_TPlot.pdf	0	39.6024	-Inf	down	3.1118e-10	6.0287e-10	yes	GO:0010556(regulation of macromolecule biosynthetic process);GO:0090304(nucleic acid metabolic process);GO:0018130(heterocycle biosynthetic process);GO:1901360(organic cyclic compound metabolic process);GO:1903506(regulation of nucleic acid-templated transcription);GO:0005488(binding);GO:0046483(heterocycle metabolic process);GO:0006351(transcription, DNA-templated);GO:0032774(RNA biosynthetic pr…	NA
PC-3p-13278_910	XM_021133290.1	276	296	287	-37	-24.38	0.658919	12	4-7,293-290;11-21,286-276	1-3,296-294[UP5];8-10,289-287[SIL]	(((((((((((...((((...&...))))...)))))))))))	GCCAAGAACAGAUGGUCACAA&UUUUGGCAAGCUGUUCUUGGC	0	0	NA	NA	NA	1	39.6024	4	1	Output/R0h/cleaveLand_result/t_plot/PC-3p-13278_910_XM_021133290.1_287_TPlot.pdf	0	39.6024	-Inf	down	3.1118e-10	6.0287e-10	yes	NA	NA
PC-3p-13278_910	XM_021134224.1	692	717	709	-37	-24.1	0.651351	15.5	5-8,713-710;10-14,709-705;15-21,698-692	1-4,717-714[UP5];9-9,x-x[BULq];x-x,704-699[BULt]	(((((((......(((((-((((....&....)))).)))))------)))))))	GCCAAGAGAAGAGGCAGC-UGCCUCAG&UUUUGGCAAGCUGU------UCUUGGC	1	32.684	4	1	Output/R8h/cleaveLand_result/t_plot/PC-3p-13278_910_XM_021134224.1_709_TPlot.pdf	0	0	NA	NA	NA	32.684	0	Inf	up	1.084e-08	1.2485e-08	yes	NA	ko01100(Metabolic pathways);ko00480(Glutathione metabolism);ko01110(Biosynthesis of secondary metabolites);ko03018(RNA degradation);ko00053(Ascorbate and aldarate metabolism);ko00561(Glycerolipid metabolism);ko00564(Glycerophospholipid metabolism)
PC-3p-13278_910	XM_021134979.1	377	397	388	-37	-24.6	0.664865	10.5	4-17,394-381	1-3,397-395[UP5];18-21,380-377[UP3]	....((((((((((((((...&...))))))))))))))....	AAAUAGAGCGGCUUGCCAUCA&UUUUGGCAAGCUGUUCUUGGC	1	32.684	4	1	Output/R8h/cleaveLand_result/t_plot/PC-3p-13278_910_XM_021134979.1_388_TPlot.pdf	0	0	NA	NA	NA	32.684	0	Inf	up	1.084e-08	1.2485e-08	yes	GO:0048037(cofactor binding);GO:0050662(coenzyme binding);GO:0043167(ion binding);GO:1901363(heterocyclic compound binding);GO:0051287(NAD binding);GO:0043168(anion binding);GO:0036094(small molecule binding);GO:1901265(nucleoside phosphate binding);GO:0000166(nucleotide binding);GO:0097159(organic cyclic compound binding);GO:0005488(binding);GO:0070403(NAD+ binding)	NA
PC-3p-13278_910	XM_021135755.1	64	87	75	-37	-24.82	0.670811	18.5	5-7,83-81;10-21,75-64	1-4,87-84[UP5];8-9,80-76[AILt]	((((((((((((.....(((....&....)))---..))))))))))))	GCCAAGGACAGCGUAAGGCUCGUC&UUUUGGC---AAGCUGUUCUUGGC	0	0	NA	NA	NA	1	39.6024	4	1	Output/R0h/cleaveLand_result/t_plot/PC-3p-13278_910_XM_021135755.1_75_TPlot.pdf	0	39.6024	-Inf	down	3.1118e-10	6.0287e-10	yes	GO:1904680(peptide transmembrane transporter activity);GO:0070727(cellular macromolecule localization);GO:0005623(cell);GO:0071702(organic substance transport);GO:0022884(macromolecule transmembrane transporter activity);GO:0034613(cellular protein localization);GO:0071705(nitrogen compound transport);GO:0005215(transporter activity);GO:0015399(primary active transmembrane transporter activity);G…	ko04145(Phagosome);ko03060(Protein export);ko04141(Protein processing in endoplasmic reticulum)
PC-3p-13278_910	XM_021139292.1	857	877	868	-37	-24.6	0.664865	5.5	2-16,876-862;19-21,859-857	1-1,877-877[UP5];17-18,861-860[SIL]	(((..(((((((((((((((.&.)))))))))))))))..)))	GUUUUGAAUGGCUUGCCAAAU&UUUUGGCAAGCUGUUCUUGGC	0	0	NA	NA	NA	1	39.6024	4	1	Output/R0h/cleaveLand_result/t_plot/PC-3p-13278_910_XM_021139292.1_868_TPlot.pdf	0	39.6024	-Inf	down	3.1118e-10	6.0287e-10	yes	GO:0016740(transferase activity);GO:0003824(catalytic activity);GO:0016757(transferase activity, transferring glycosyl groups);GO:0031224(intrinsic component of membrane);GO:0044425(membrane part);GO:0016021(integral component of membrane);GO:0016020(membrane)	ko00515(Mannose type O-glycan biosynthesis);ko01100(Metabolic pathways)
PC-3p-13278_910	XM_021139870.1	688	708	699	-37	-24.9	0.672973	8	1-9,708-700;12-21,697-688	10-11,699-698[SIL]	((((((((((..(((((((((&)))))))))..))))))))))	GCUAGGAACAUGUUGCUAGGA&UUUUGGCAAGCUGUUCUUGGC	1	32.684	4	1	Output/R8h/cleaveLand_result/t_plot/PC-3p-13278_910_XM_021139870.1_699_TPlot.pdf	0	0	NA	NA	NA	32.684	0	Inf	up	1.084e-08	1.2485e-08	yes	GO:0031224(intrinsic component of membrane);GO:0044425(membrane part);GO:0016020(membrane);GO:0016021(integral component of membrane)	NA
PC-3p-13278_910	XM_021139872.1	436	456	447	-37	-24.9	0.672973	8	1-9,456-448;12-21,445-436	10-11,447-446[SIL]	((((((((((..(((((((((&)))))))))..))))))))))	GCUAGGAACAUGUUGCUAGGA&UUUUGGCAAGCUGUUCUUGGC	1	32.684	4	1	Output/R8h/cleaveLand_result/t_plot/PC-3p-13278_910_XM_021139872.1_447_TPlot.pdf	0	0	NA	NA	NA	32.684	0	Inf	up	1.084e-08	1.2485e-08	yes	GO:0031224(intrinsic component of membrane);GO:0044425(membrane part);GO:0016020(membrane);GO:0016021(integral component of membrane)	NA
PC-3p-13278_910	XM_021140399.1	322	344	335	-37	-25.6	0.691892	11	5-12,340-333;14-17,331-328;18-21,325-322	1-4,344-341[UP5];13-13,332-332[SIL];x-x,327-326[BULt]	((((..((((.((((((((....&....)))))))).))))--))))	GCCGACAGAGGAGCUUGCCUCCG&UUUUGGCAAGCUGUUCU--UGGC	0	0	NA	NA	NA	1	39.6024	4	0.999824	Output/R0h/cleaveLand_result/t_plot/PC-3p-13278_910_XM_021140399.1_335_TPlot.pdf	0	39.6024	-Inf	down	3.1118e-10	6.0287e-10	yes	GO:0050789(regulation of biological process);GO:0030234(enzyme regulator activity);GO:0006810(transport);GO:0060341(regulation of cellular localization);GO:0060589(nucleoside-triphosphatase regulator activity);GO:0044425(membrane part);GO:0048209(regulation of vesicle targeting, to, from or within Golgi);GO:0009306(protein secretion);GO:0016491(oxidoreductase activity);GO:0016628(oxidoreductase a…	ko04141(Protein processing in endoplasmic reticulum)
PC-3p-13278_910	XM_021140400.1	298	320	311	-37	-25.6	0.691892	11	5-12,316-309;14-17,307-304;18-21,301-298	1-4,320-317[UP5];13-13,308-308[SIL];x-x,303-302[BULt]	((((..((((.((((((((....&....)))))))).))))--))))	GCCGACAGAGGAGCUUGCCUCCG&UUUUGGCAAGCUGUUCU--UGGC	1	32.684	4	0.999971	Output/R8h/cleaveLand_result/t_plot/PC-3p-13278_910_XM_021140400.1_311_TPlot.pdf	0	0	NA	NA	NA	32.684	0	Inf	up	1.084e-08	1.2485e-08	yes	GO:0050789(regulation of biological process);GO:0030234(enzyme regulator activity);GO:0006810(transport);GO:0060341(regulation of cellular localization);GO:0060589(nucleoside-triphosphatase regulator activity);GO:0044425(membrane part);GO:0048209(regulation of vesicle targeting, to, from or within Golgi);GO:0009306(protein secretion);GO:0016491(oxidoreductase activity);GO:0016628(oxidoreductase a…	ko04141(Protein processing in endoplasmic reticulum)
PC-3p-13278_910	XM_021140420.1	540	565	552	-37	-24.4	0.659459	17.5	5-7,561-559;8-10,554-552;11-21,550-540	1-4,565-562[UP5];x-x,558-555[BULt];x-x,551-551[BULt]	(((((((((((.(((....(((....&....)))----)))-)))))))))))	GCCAAGGACAGACUUGAGAGCCUCAU&UUUUGGC----AAG-CUGUUCUUGGC	1	32.684	4	1	Output/R8h/cleaveLand_result/t_plot/PC-3p-13278_910_XM_021140420.1_552_TPlot.pdf	1	39.6024	4	1	Output/R0h/cleaveLand_result/t_plot/PC-3p-13278_910_XM_021140420.1_552_TPlot.pdf	32.684	39.6024	-0.277003	down	0.4158	0.417305	yes	NA	NA
PC-3p-13278_910	XM_021140791.1	1068	1088	1078	-37	-24.5	0.662162	6.5	1-9,1088-1080;10-11,1078-1077;13-20,1076-1069	x-x,1079-1079[BULt];12-12,x-x[BULq];21-21,1068-1068[UP3]	.((((((((-((.(((((((((&)))))))))-)).)))))))).	UCCAAGAAC-GCAUUGCCAAGG&UUUUGGCAA-GCUGUUCUUGGC	0	0	NA	NA	NA	1	39.6024	4	1	Output/R0h/cleaveLand_result/t_plot/PC-3p-13278_910_XM_021140791.1_1078_TPlot.pdf	0	39.6024	-Inf	down	3.1118e-10	6.0287e-10	yes	GO:0044424(intracellular part);GO:0043169(cation binding);GO:0005622(intracellular);GO:0044464(cell part);GO:0005488(binding);GO:0005737(cytoplasm);GO:0046872(metal ion binding);GO:0005623(cell);GO:0043167(ion binding)	NA
PC-3p-13278_910	XM_021140904.1	606	632	623	-37	-24.1	0.651351	16.5	1-12,632-621;13-20,614-607	x-x,620-615[BULt];21-21,606-606[UP3]	.((((((((......((((((((((((&))))))))))))------)))))))).	UCCAGGGGCUUCUUCAGCUUGCUAAGA&UUUUGGCAAGCU------GUUCUUGGC	1	32.684	4	1	Output/R8h/cleaveLand_result/t_plot/PC-3p-13278_910_XM_021140904.1_623_TPlot.pdf	0	0	NA	NA	NA	32.684	0	Inf	up	1.084e-08	1.2485e-08	yes	GO:0046914(transition metal ion binding);GO:0097159(organic cyclic compound binding);GO:0008270(zinc ion binding);GO:0003676(nucleic acid binding);GO:0043169(cation binding);GO:0046872(metal ion binding);GO:0005488(binding);GO:1901363(heterocyclic compound binding);GO:0043167(ion binding)	NA
PC-3p-13278_910	XM_021142106.1	632	652	643	-37	-24.8	0.67027	4	1-13,652-640;15-16,638-637;18-20,635-633	14-14,639-639[SIL];17-17,636-636[SIL];21-21,632-632[UP3]	.(((.((.(((((((((((((&))))))))))))).)).))).	ACCAUGAUCAGCUUGUCAAAA&UUUUGGCAAGCUGUUCUUGGC	2	65.368	2	0.999254	Output/R8h/cleaveLand_result/t_plot/PC-3p-13278_910_XM_021142106.1_643_TPlot.pdf	0	0	NA	NA	NA	65.368	0	Inf	up	6.2072e-16	2.71719e-15	yes	GO:0005524(ATP binding);GO:1901363(heterocyclic compound binding);GO:1901564(organonitrogen compound metabolic process);GO:0043170(macromolecule metabolic process);GO:0008152(metabolic process);GO:0003824(catalytic activity);GO:0044237(cellular metabolic process);GO:0032555(purine ribonucleotide binding);GO:0043167(ion binding);GO:0036211(protein modification process);GO:0006468(protein phosphory…	ko03008(Ribosome biogenesis in eukaryotes);ko04712(Circadian rhythm - plant)
PC-3p-13278_910	XM_021142393.1	2762	2782	2773	-37	-26.6	0.718919	4	1-8,2782-2775;10-13,2773-2770;15-16,2768-2767;18-21,2765-2762	9-9,2774-2774[SIL];14-14,2769-2769[SIL];17-17,2766-2766[SIL]	((((.((.((((.((((((((&)))))))).)))).)).))))	GCCAUGAUCAGCGUGCCAAAA&UUUUGGCAAGCUGUUCUUGGC	0	0	NA	NA	NA	1	39.6024	4	0.975646	Output/R0h/cleaveLand_result/t_plot/PC-3p-13278_910_XM_021142393.1_2773_TPlot.pdf	0	39.6024	-Inf	down	3.1118e-10	6.0287e-10	yes	NA	ko04933(AGE-RAGE signaling pathway in diabetic complications)
PC-3p-13278_910	XM_021142618.1	792	811	802	-37	-24.9	0.672973	10.5	5-13,807-799;16-21,797-792	1-4,811-808[UP5];14-15,798-798[AILq]	((((((.-(((((((((....&....)))))))))..))))))	GCCAGGU-CAGCUUGCUUAAC&UUUUGGCAAGCUGUUCUUGGC	0	0	NA	NA	NA	1	39.6024	4	1	Output/R0h/cleaveLand_result/t_plot/PC-3p-13278_910_XM_021142618.1_802_TPlot.pdf	0	39.6024	-Inf	down	3.1118e-10	6.0287e-10	yes	GO:0043226(organelle);GO:0006468(protein phosphorylation);GO:0043229(intracellular organelle);GO:0044267(cellular protein metabolic process);GO:0005737(cytoplasm);GO:0071704(organic substance metabolic process);GO:0044424(intracellular part);GO:0004672(protein kinase activity);GO:0016301(kinase activity);GO:0044237(cellular metabolic process);GO:0019538(protein metabolic process);GO:0006796(phosp…	NA
PC-3p-13278_910	XM_021143426.1	1096	1120	1109	-37	-25.7	0.694595	8.5	1-8,1120-1113;9-15,1110-1104;16-19,1102-1099;20-21,1097-1096	x-x,1112-1111[BULt];x-x,1103-1103[BULt];x-x,1098-1098[BULt]	((.((((.(((((((..((((((((&))))))))--)))))))-))))-))	GCUCAAGAAGCAGCUCAUGCCAGGA&UUUUGGCA--AGCUGUU-CUUG-GC	0	0	NA	NA	NA	1	39.6024	4	0.999533	Output/R0h/cleaveLand_result/t_plot/PC-3p-13278_910_XM_021143426.1_1109_TPlot.pdf	0	39.6024	-Inf	down	3.1118e-10	6.0287e-10	yes	NA	NA
PC-3p-134942_50	XM_016084087.2	748	762	753	-36.3	-24.2	0.666667	3	11-24,761-748	10-10,762-762[SIL]	((((((((((((((.&.))))))))))))))	AGUGUCUCAGUGAUG&ACGAUUAAAAAUCAC	0	0	NA	NA	NA	1	39.6024	4	0.268496	Output/R0h/cleaveLand_result/t_plot/PC-3p-134942_50_XM_016084087.2_753_TPlot.pdf	0	39.6024	-Inf	down	3.1118e-10	6.0287e-10	yes	GO:0016787(hydrolase activity);GO:0003824(catalytic activity)	NA
PC-3p-134942_50	XM_021131267.1	498	519	512	-36.3	-23.98	0.660606	12	1-6,519-514;11-22,511-500	7-10,513-512[AILq];23-24,499-498[UP3]	..((((((((((((..--((((((&))))))....))))))))))))..	ACUGUCUCAGUGAUGG--GAUUGU&ACGAUUAAAAAUCACUGAGACACU	1	32.684	4	0.47451	Output/R8h/cleaveLand_result/t_plot/PC-3p-134942_50_XM_021131267.1_512_TPlot.pdf	0	0	NA	NA	NA	32.684	0	Inf	up	1.084e-08	1.2485e-08	yes	GO:0044267(cellular protein metabolic process);GO:0016020(membrane);GO:0005488(binding);GO:0006468(protein phosphorylation);GO:1901265(nucleoside phosphate binding);GO:0000166(nucleotide binding);GO:0005886(plasma membrane);GO:0036094(small molecule binding);GO:0006796(phosphate-containing compound metabolic process);GO:0030054(cell junction);GO:0004672(protein kinase activity);GO:0005623(cell);G…	NA
PC-3p-134942_50	XM_021131269.1	498	519	512	-36.3	-23.98	0.660606	12	1-6,519-514;11-22,511-500	7-10,513-512[AILq];23-24,499-498[UP3]	..((((((((((((..--((((((&))))))....))))))))))))..	ACUGUCUCAGUGAUGG--GAUUGU&ACGAUUAAAAAUCACUGAGACACU	1	32.684	4	0.399686	Output/R8h/cleaveLand_result/t_plot/PC-3p-134942_50_XM_021131269.1_512_TPlot.pdf	0	0	NA	NA	NA	32.684	0	Inf	up	1.084e-08	1.2485e-08	yes	GO:0044267(cellular protein metabolic process);GO:0016020(membrane);GO:0005488(binding);GO:0006468(protein phosphorylation);GO:1901265(nucleoside phosphate binding);GO:0000166(nucleotide binding);GO:0005886(plasma membrane);GO:0036094(small molecule binding);GO:0006796(phosphate-containing compound metabolic process);GO:0030054(cell junction);GO:0004672(protein kinase activity);GO:0005623(cell);G…	NA
PC-3p-1355_7915	BGI_novel_T004481	360	382	371	-29.6	-20	0.675676	6.5	2-5,381-378;6-8,376-374;9-21,372-360	1-1,382-382[UP5];x-x,377-377[BULt];x-x,373-373[BULt]	(((((((((((((.(((.((((.&.))))-)))-)))))))))))))	UACUUGAUCAAAUGUCUCUACCU&UGGUA-AGA-GUUUGAUUAAGUA	1	32.684	4	0.999526	Output/R8h/cleaveLand_result/t_plot/PC-3p-1355_7915_BGI_novel_T004481_371_TPlot.pdf	0	0	NA	NA	NA	32.684	0	Inf	up	1.084e-08	1.2485e-08	yes	GO:0043226(organelle);GO:0051171(regulation of nitrogen compound metabolic process);GO:0005515(protein binding);GO:0050794(regulation of cellular process);GO:0043227(membrane-bounded organelle);GO:0003676(nucleic acid binding);GO:0005488(binding);GO:0080090(regulation of primary metabolic process);GO:1903506(regulation of nucleic acid-templated transcription);GO:0019222(regulation of metabolic pr…	NA
PC-3p-1355_7915	BGI_novel_T006564	2664	2685	2676	-29.6	-21.3	0.719595	5	1-12,2685-2674;13-15,2672-2670;17-21,2668-2664	x-x,2673-2673[BULt];16-16,2669-2669[SIL]	(((((.(((.((((((((((((&))))))))))))-))).)))))	UACUUUGUUAAAGCUCUUACCA&UGGUAAGAGUUU-GAUUAAGUA	1	32.684	4	0.91667	Output/R8h/cleaveLand_result/t_plot/PC-3p-1355_7915_BGI_novel_T006564_2676_TPlot.pdf	0	0	NA	NA	NA	32.684	0	Inf	up	1.084e-08	1.2485e-08	yes	GO:0043231(intracellular membrane-bounded organelle);GO:0043229(intracellular organelle);GO:0005622(intracellular);GO:0044424(intracellular part);GO:0005623(cell);GO:0005634(nucleus);GO:0044464(cell part);GO:0043226(organelle);GO:0005737(cytoplasm);GO:0043227(membrane-bounded organelle)	ko03018(RNA degradation)
PC-3p-1355_7915	BGI_novel_T006619	2457	2476	2468	-29.6	-19.9	0.672297	6.5	2-5,2475-2472;7-20,2471-2458	1-1,2476-2476[UP5];6-6,x-x[BULq];21-21,2457-2457[UP3]	.((((((((((((((-((((.&.)))).)))))))))))))).	AACUUAAUUAAACUC-UGCUG&UGGUAAGAGUUUGAUUAAGUA	0	0	NA	NA	NA	1	39.6024	4	0.999143	Output/R0h/cleaveLand_result/t_plot/PC-3p-1355_7915_BGI_novel_T006619_2468_TPlot.pdf	0	39.6024	-Inf	down	3.1118e-10	6.0287e-10	yes	GO:0016491(oxidoreductase activity);GO:0006807(nitrogen compound metabolic process);GO:0046914(transition metal ion binding);GO:0005488(binding);GO:0008152(metabolic process);GO:0003824(catalytic activity);GO:0046872(metal ion binding);GO:0008131(primary amine oxidase activity);GO:0043167(ion binding);GO:0005507(copper ion binding);GO:0048037(cofactor binding);GO:0071704(organic substance metabol…	ko01100(Metabolic pathways);ko00360(Phenylalanine metabolism);ko00410(beta-Alanine metabolism);ko00950(Isoquinoline alkaloid biosynthesis);ko00960(Tropane, piperidine and pyridine alkaloid biosynthesis);ko01110(Biosynthesis of secondary metabolites);ko00350(Tyrosine metabolism);ko00260(Glycine, serine and threonine metabolism)
PC-3p-1355_7915	BGI_novel_T008145	654	679	670	-29.6	-20.4	0.689189	11	3-16,677-664;17-21,658-654	1-2,679-678[UP5];x-x,663-659[BULt]	(((((.....((((((((((((((..&..))))))))))))))-----)))))	UACUUCUAAGGGUCAAGCUCUUGCAG&UGGUAAGAGUUUGAUU-----AAGUA	0	0	NA	NA	NA	1	39.6024	4	0.988956	Output/R0h/cleaveLand_result/t_plot/PC-3p-1355_7915_BGI_novel_T008145_670_TPlot.pdf	0	39.6024	-Inf	down	3.1118e-10	6.0287e-10	yes	GO:0005622(intracellular);GO:1901265(nucleoside phosphate binding);GO:0032561(guanyl ribonucleotide binding);GO:0050896(response to stimulus);GO:0007165(signal transduction);GO:0043167(ion binding);GO:0005623(cell);GO:0097367(carbohydrate derivative binding);GO:0097159(organic cyclic compound binding);GO:0016462(pyrophosphatase activity);GO:0032550(purine ribonucleoside binding);GO:0036094(small …	ko04144(Endocytosis)
PC-3p-1355_7915	BGI_novel_T010363	1049	1070	1061	-29.6	-19.7	0.665541	6.5	1-11,1070-1060;13-18,1058-1053;19-20,1051-1050	12-12,1059-1059[SIL];x-x,1052-1052[BULt];21-21,1049-1049[UP3]	.((.((((((.(((((((((((&))))))))))).))))))-)).	CACGUUGAUCCAGCUCUUACUA&UGGUAAGAGUUUGAUUAA-GUA	1	32.684	4	0.999893	Output/R8h/cleaveLand_result/t_plot/PC-3p-1355_7915_BGI_novel_T010363_1061_TPlot.pdf	0	0	NA	NA	NA	32.684	0	Inf	up	1.084e-08	1.2485e-08	yes	NA	NA
PC-3p-1355_7915	BGI_novel_T010364	2272	2293	2284	-29.6	-19.7	0.665541	6.5	1-11,2293-2283;13-18,2281-2276;19-20,2274-2273	12-12,2282-2282[SIL];x-x,2275-2275[BULt];21-21,2272-2272[UP3]	.((.((((((.(((((((((((&))))))))))).))))))-)).	CACGUUGAUCCAGCUCUUACUA&UGGUAAGAGUUUGAUUAA-GUA	1	32.684	4	0.999908	Output/R8h/cleaveLand_result/t_plot/PC-3p-1355_7915_BGI_novel_T010364_2284_TPlot.pdf	0	0	NA	NA	NA	32.684	0	Inf	up	1.084e-08	1.2485e-08	yes	NA	NA
PC-3p-1355_7915	BGI_novel_T011108	523	544	535	-29.6	-20.5	0.692568	9	3-17,542-528;18-20,526-524	1-2,544-543[UP5];x-x,527-527[BULt];21-21,523-523[UP3]	.(((.(((((((((((((((..&..)))))))))))))))-))).	GGCUGUGAUCAGAUUCUUGCGG&UGGUAAGAGUUUGAUUA-AGUA	1	32.684	4	0.988173	Output/R8h/cleaveLand_result/t_plot/PC-3p-1355_7915_BGI_novel_T011108_535_TPlot.pdf	0	0	NA	NA	NA	32.684	0	Inf	up	1.084e-08	1.2485e-08	yes	GO:0044464(cell part);GO:0044238(primary metabolic process);GO:0046872(metal ion binding);GO:0007127(meiosis I);GO:0043232(intracellular non-membrane-bounded organelle);GO:0098813(nuclear chromosome segregation);GO:0000003(reproduction);GO:0043228(non-membrane-bounded organelle);GO:0090304(nucleic acid metabolic process);GO:0033554(cellular response to stress);GO:0006950(response to stress);GO:00…	ko03440(Homologous recombination)
PC-3p-1355_7915	BGI_novel_T011771	394	413	404	-29.6	-19.3	0.652027	8.5	3-14,411-400;18-21,397-394	1-2,413-412[UP5];15-17,399-398[AILq]	((((..-((((((((((((..&..))))))))))))...))))	UGCUGC-UCAGGCUCUUACAA&UGGUAAGAGUUUGAUUAAGUA	0	0	NA	NA	NA	1	39.6024	4	0.999993	Output/R0h/cleaveLand_result/t_plot/PC-3p-1355_7915_BGI_novel_T011771_404_TPlot.pdf	0	39.6024	-Inf	down	3.1118e-10	6.0287e-10	yes	NA	NA
PC-3p-1355_7915	BGI_novel_T013525	924	949	940	-29.6	-20.3	0.685811	15	2-10,948-940;11-20,934-925	1-1,949-949[UP5];x-x,939-935[BULt];21-21,924-924[UP3]	.((((((((((.....(((((((((.&.)))))))))-----)))))))))).	AACUUAAUCAGGAGAUACUCUUGCUU&UGGUAAGAGU-----UUGAUUAAGUA	1	32.684	4	0.998849	Output/R8h/cleaveLand_result/t_plot/PC-3p-1355_7915_BGI_novel_T013525_940_TPlot.pdf	0	0	NA	NA	NA	32.684	0	Inf	up	1.084e-08	1.2485e-08	yes	GO:0097367(carbohydrate derivative binding);GO:0043167(ion binding);GO:0016301(kinase activity);GO:0016740(transferase activity);GO:0036094(small molecule binding);GO:0032555(purine ribonucleotide binding);GO:0005488(binding);GO:0030554(adenyl nucleotide binding);GO:0032559(adenyl ribonucleotide binding);GO:0003824(catalytic activity);GO:1901265(nucleoside phosphate binding);GO:0043168(anion bind…	NA
PC-3p-1355_7915	XM_016077858.2	396	415	407	-29.6	-20.4	0.689189	9	2-5,414-411;7-16,410-401;18-20,399-397	1-1,415-415[UP5];6-6,x-x[BULq];17-17,400-400[SIL];21-21,396-396[UP3]	.(((.((((((((((-((((.&.)))).)))))))))).))).	AGCUGGAUCAGGCUC-UGCCU&UGGUAAGAGUUUGAUUAAGUA	1	32.684	4	0.994679	Output/R8h/cleaveLand_result/t_plot/PC-3p-1355_7915_XM_016077858.2_407_TPlot.pdf	0	0	NA	NA	NA	32.684	0	Inf	up	1.084e-08	1.2485e-08	yes	NA	NA
PC-3p-1355_7915	XM_016084270.2	238	257	249	-29.6	-19.5	0.658784	8	2-5,256-253;7-19,252-240	1-1,257-257[UP5];6-6,x-x[BULq];20-21,239-238[UP3]	..(((((((((((((-((((.&.)))).)))))))))))))..	CUCUUGGUCAAGCUU-UACCG&UGGUAAGAGUUUGAUUAAGUA	0	0	NA	NA	NA	2	79.2048	3	0.508738	Output/R0h/cleaveLand_result/t_plot/PC-3p-1355_7915_XM_016084270.2_249_TPlot.pdf	0	79.2048	-Inf	down	5.5905e-19	3.89431e-18	yes	GO:0003735(structural constituent of ribosome);GO:0043228(non-membrane-bounded organelle);GO:0071704(organic substance metabolic process);GO:0006518(peptide metabolic process);GO:0043232(intracellular non-membrane-bounded organelle);GO:0043043(peptide biosynthetic process);GO:0022625(cytosolic large ribosomal subunit);GO:0022626(cytosolic ribosome);GO:0044237(cellular metabolic process);GO:000519…	ko03010(Ribosome)
PC-3p-1355_7915	XM_016085157.2	1149	1170	1160	-29.6	-23.9	0.807432	5	1-2,1170-1169;3-14,1167-1156;16-21,1154-1149	x-x,1168-1168[BULt];15-15,1155-1155[SIL]	((((((.((((((((((((.((&))-)))))))))))).))))))	UACUUAUUCAAGCUCUUGCACA&UG-GUAAGAGUUUGAUUAAGUA	0	0	NA	NA	NA	1	39.6024	4	0.0536794	Output/R0h/cleaveLand_result/t_plot/PC-3p-1355_7915_XM_016085157.2_1160_TPlot.pdf	0	39.6024	-Inf	down	3.1118e-10	6.0287e-10	yes	GO:0050789(regulation of biological process);GO:0051171(regulation of nitrogen compound metabolic process);GO:0003700(DNA binding transcription factor activity);GO:0010468(regulation of gene expression);GO:0043229(intracellular organelle);GO:0005623(cell);GO:0050794(regulation of cellular process);GO:0043565(sequence-specific DNA binding);GO:0044464(cell part);GO:0065007(biological regulation);GO…	ko04075(Plant hormone signal transduction)
PC-3p-1355_7915	XM_016086710.2	2932	2952	2943	-29.6	-19.7	0.665541	8.5	3-18,2950-2935	1-2,2952-2951[UP5];19-21,2934-2932[UP3]	...((((((((((((((((..&..))))))))))))))))...	CCAUUAGUCAAGCUCUUAUAU&UGGUAAGAGUUUGAUUAAGUA	1	32.684	4	0.999937	Output/R8h/cleaveLand_result/t_plot/PC-3p-1355_7915_XM_016086710.2_2943_TPlot.pdf	1	39.6024	4	0.999671	Output/R0h/cleaveLand_result/t_plot/PC-3p-1355_7915_XM_016086710.2_2943_TPlot.pdf	32.684	39.6024	-0.277003	down	0.4158	0.417305	yes	GO:0016887(ATPase activity);GO:0009058(biosynthetic process);GO:1901566(organonitrogen compound biosynthetic process);GO:1901293(nucleoside phosphate biosynthetic process);GO:0032553(ribonucleotide binding);GO:0009127(purine nucleoside monophosphate biosynthetic process);GO:0055086(nucleobase-containing small molecule metabolic process);GO:0055085(transmembrane transport);GO:0003824(catalytic act…	ko00190(Oxidative phosphorylation)
PC-3p-1355_7915	XM_016086725.2	2849	2869	2860	-29.6	-19.7	0.665541	8.5	3-18,2867-2852	1-2,2869-2868[UP5];19-21,2851-2849[UP3]	...((((((((((((((((..&..))))))))))))))))...	CCAUUAGUCAAGCUCUUAUAU&UGGUAAGAGUUUGAUUAAGUA	0	0	NA	NA	NA	3	118.807	2	0.917394	Output/R0h/cleaveLand_result/t_plot/PC-3p-1355_7915_XM_016086725.2_2860_TPlot.pdf	0	118.807	-Inf	down	1.1501e-27	2.01922e-26	yes	GO:0016887(ATPase activity);GO:0009058(biosynthetic process);GO:1901566(organonitrogen compound biosynthetic process);GO:1901293(nucleoside phosphate biosynthetic process);GO:0032553(ribonucleotide binding);GO:0009127(purine nucleoside monophosphate biosynthetic process);GO:0055086(nucleobase-containing small molecule metabolic process);GO:0055085(transmembrane transport);GO:0003824(catalytic act…	ko00190(Oxidative phosphorylation)
PC-3p-1355_7915	XM_016088525.2	973	993	984	-29.6	-19.4	0.655405	8.5	3-11,991-983;13-20,981-974	1-2,993-992[UP5];12-12,982-982[SIL];21-21,973-973[UP3]	.((((((((.(((((((((..&..))))))))).)))))))).	AACUUGAUCUAAUUCUUGCAA&UGGUAAGAGUUUGAUUAAGUA	0	0	NA	NA	NA	1	39.6024	4	0.999964	Output/R0h/cleaveLand_result/t_plot/PC-3p-1355_7915_XM_016088525.2_984_TPlot.pdf	0	39.6024	-Inf	down	3.1118e-10	6.0287e-10	yes	NA	ko00500(Starch and sucrose metabolism);ko01100(Metabolic pathways)
PC-3p-1355_7915	XM_016090506.1	999	1027	1018	-29.6	-19.3	0.652027	11.5	1-13,1027-1015;14-21,1006-999	x-x,1014-1007[BULt]	((((((((........(((((((((((((&)))))))))))))--------))))))))	UGCUUGAUGAGUUCACUAGAUUCUUACCA&UGGUAAGAGUUUG--------AUUAAGUA	1	32.684	4	1	Output/R8h/cleaveLand_result/t_plot/PC-3p-1355_7915_XM_016090506.1_1018_TPlot.pdf	0	0	NA	NA	NA	32.684	0	Inf	up	1.084e-08	1.2485e-08	yes	GO:0031327(negative regulation of cellular biosynthetic process);GO:1903507(negative regulation of nucleic acid-templated transcription);GO:0006355(regulation of transcription, DNA-templated);GO:0070013(intracellular organelle lumen);GO:0016043(cellular component organization);GO:0051276(chromosome organization);GO:0051252(regulation of RNA metabolic process);GO:0044464(cell part);GO:0044428(nucl…	NA
PC-3p-1355_7915	XM_016092154.2	677	698	689	-29.6	-20.5	0.692568	9	3-17,696-682;18-20,680-678	1-2,698-697[UP5];x-x,681-681[BULt];21-21,677-677[UP3]	.(((.(((((((((((((((..&..)))))))))))))))-))).	GGCUGUGAUCAGAUUCUUGCGG&UGGUAAGAGUUUGAUUA-AGUA	1	32.684	4	0.992067	Output/R8h/cleaveLand_result/t_plot/PC-3p-1355_7915_XM_016092154.2_689_TPlot.pdf	0	0	NA	NA	NA	32.684	0	Inf	up	1.084e-08	1.2485e-08	yes	GO:0046914(transition metal ion binding);GO:0016853(isomerase activity);GO:0044237(cellular metabolic process);GO:0003676(nucleic acid binding);GO:0043226(organelle);GO:0090304(nucleic acid metabolic process);GO:0009987(cellular process);GO:0046872(metal ion binding);GO:0003917(DNA topoisomerase type I activity);GO:0006265(DNA topological change);GO:0046483(heterocycle metabolic process);GO:00432…	ko03440(Homologous recombination)
PC-3p-1355_7915	XM_016103128.2	366	391	382	-29.6	-20.2	0.682432	12.5	1-11,391-381;12-17,377-372;18-20,369-367	x-x,380-378[BULt];x-x,371-370[BULt];21-21,366-366[UP3]	.(((..((((((...(((((((((((&)))))))))))---))))))--))).	AGCUCAUGGUCAUGGAGCUCUUGCCA&UGGUAAGAGUU---UGAUUA--AGUA	0	0	NA	NA	NA	1	39.6024	4	0.996838	Output/R0h/cleaveLand_result/t_plot/PC-3p-1355_7915_XM_016103128.2_382_TPlot.pdf	0	39.6024	-Inf	down	3.1118e-10	6.0287e-10	yes	GO:1901363(heterocyclic compound binding);GO:0016740(transferase activity);GO:0000166(nucleotide binding);GO:1901265(nucleoside phosphate binding);GO:0016773(phosphotransferase activity, alcohol group as acceptor);GO:0005488(binding);GO:0016772(transferase activity, transferring phosphorus-containing groups);GO:0003824(catalytic activity);GO:0036094(small molecule binding);GO:0016310(phosphorylat…	NA
PC-3p-1355_7915	XM_016104429.2	823	846	837	-29.6	-19.7	0.665541	11.5	2-11,845-836;12-18,832-826	1-1,846-846[UP5];x-x,835-833[BULt];19-21,825-823[UP3]	...(((((((...((((((((((.&.))))))))))---)))))))...	AGAUUGAUCAGUCAGCUCUUACCG&UGGUAAGAGUU---UGAUUAAGUA	0	0	NA	NA	NA	2	79.2048	3	0.450841	Output/R0h/cleaveLand_result/t_plot/PC-3p-1355_7915_XM_016104429.2_837_TPlot.pdf	0	79.2048	-Inf	down	5.5905e-19	3.89431e-18	yes	GO:0009987(cellular process);GO:0009123(nucleoside monophosphate metabolic process);GO:0017111(nucleoside-triphosphatase activity);GO:0006164(purine nucleotide biosynthetic process);GO:0043492(ATPase activity, coupled to movement of substances);GO:0009124(nucleoside monophosphate biosynthetic process);GO:0071704(organic substance metabolic process);GO:0005488(binding);GO:0019693(ribose phosphate …	ko00190(Oxidative phosphorylation)
PC-3p-1355_7915	XM_016105870.2	329	349	340	-29.6	-19.4	0.655405	7	2-14,348-336;16-21,334-329	1-1,349-349[UP5];15-15,335-335[SIL]	((((((.(((((((((((((.&.))))))))))))).))))))	UAUUUGUUCAAGCUUUUGCUG&UGGUAAGAGUUUGAUUAAGUA	3	98.052	2	0.984988	Output/R8h/cleaveLand_result/t_plot/PC-3p-1355_7915_XM_016105870.2_340_TPlot.pdf	0	0	NA	NA	NA	98.052	0	Inf	up	4.0654e-23	4.95325e-22	yes	GO:0000166(nucleotide binding);GO:0043167(ion binding);GO:0007154(cell communication);GO:0036094(small molecule binding);GO:0035556(intracellular signal transduction);GO:0005488(binding);GO:1901265(nucleoside phosphate binding);GO:0005525(GTP binding);GO:0097367(carbohydrate derivative binding);GO:0050789(regulation of biological process);GO:0065007(biological regulation);GO:0043168(anion binding…	NA
PC-3p-1355_7915	XM_016108772.2	870	891	881	-29.6	-21.3	0.719595	6.5	1-7,891-885;8-20,883-871	x-x,884-884[BULt];21-21,870-870[UP3]	.(((((((((((((.(((((((&)))))))-))))))))))))).	CACUUGAUCAAGCUAUUUACUA&UGGUAAG-AGUUUGAUUAAGUA	2	65.368	2	0.580305	Output/R8h/cleaveLand_result/t_plot/PC-3p-1355_7915_XM_016108772.2_881_TPlot.pdf	0	0	NA	NA	NA	65.368	0	Inf	up	6.2072e-16	2.71719e-15	yes	GO:0003677(DNA binding);GO:0003676(nucleic acid binding);GO:0009889(regulation of biosynthetic process);GO:0031323(regulation of cellular metabolic process);GO:0051171(regulation of nitrogen compound metabolic process);GO:0043229(intracellular organelle);GO:0006355(regulation of transcription, DNA-templated);GO:0031326(regulation of cellular biosynthetic process);GO:0010556(regulation of macromol…	ko04075(Plant hormone signal transduction)
PC-3p-1355_7915	XM_016108773.2	850	871	861	-29.6	-21.3	0.719595	6.5	1-7,871-865;8-20,863-851	x-x,864-864[BULt];21-21,850-850[UP3]	.(((((((((((((.(((((((&)))))))-))))))))))))).	CACUUGAUCAAGCUAUUUACUA&UGGUAAG-AGUUUGAUUAAGUA	2	65.368	2	0.583434	Output/R8h/cleaveLand_result/t_plot/PC-3p-1355_7915_XM_016108773.2_861_TPlot.pdf	0	0	NA	NA	NA	65.368	0	Inf	up	6.2072e-16	2.71719e-15	yes	GO:0003677(DNA binding);GO:0003676(nucleic acid binding);GO:0009889(regulation of biosynthetic process);GO:0031323(regulation of cellular metabolic process);GO:0051171(regulation of nitrogen compound metabolic process);GO:0043229(intracellular organelle);GO:0006355(regulation of transcription, DNA-templated);GO:0031326(regulation of cellular biosynthetic process);GO:0010556(regulation of macromol…	ko04075(Plant hormone signal transduction)
PC-3p-1355_7915	XM_016110755.2	860	882	871	-29.6	-19.26	0.650676	12	1-3,882-880;7-20,874-861	4-6,879-875[AILt];21-21,860-860[UP3]	.((((((((((((((.....(((&)))--...)))))))))))))).	AACUUAAUCAAAUUCGAAUUCCA&UGG--UAAGAGUUUGAUUAAGUA	5	163.42	2	0.994021	Output/R8h/cleaveLand_result/t_plot/PC-3p-1355_7915_XM_016110755.2_871_TPlot.pdf	0	0	NA	NA	NA	163.42	0	Inf	up	2.0116e-37	7.98927e-36	yes	GO:0003824(catalytic activity);GO:0000287(magnesium ion binding);GO:0043169(cation binding);GO:0005488(binding);GO:0043168(anion binding);GO:1901363(heterocyclic compound binding);GO:0019842(vitamin binding);GO:0097159(organic cyclic compound binding);GO:0030976(thiamine pyrophosphate binding);GO:0036094(small molecule binding);GO:0046872(metal ion binding);GO:1901681(sulfur compound binding);GO:…	ko04146(Peroxisome)
PC-3p-1355_7915	XM_016114405.2	625	650	641	-29.6	-20.4	0.689189	11	3-16,648-635;17-21,629-625	1-2,650-649[UP5];x-x,634-630[BULt]	(((((.....((((((((((((((..&..))))))))))))))-----)))))	UACUUCUAAGGGUCAAGCUCUUGCAG&UGGUAAGAGUUUGAUU-----AAGUA	1	32.684	4	0.995738	Output/R8h/cleaveLand_result/t_plot/PC-3p-1355_7915_XM_016114405.2_641_TPlot.pdf	2	79.2048	2	0.744936	Output/R0h/cleaveLand_result/t_plot/PC-3p-1355_7915_XM_016114405.2_641_TPlot.pdf	32.684	79.2048	-1.277	down	1.092e-05	1.21603e-05	yes	GO:0005622(intracellular);GO:1901265(nucleoside phosphate binding);GO:0032561(guanyl ribonucleotide binding);GO:0050896(response to stimulus);GO:0007165(signal transduction);GO:0043167(ion binding);GO:0005623(cell);GO:0097367(carbohydrate derivative binding);GO:0097159(organic cyclic compound binding);GO:0016462(pyrophosphatase activity);GO:0032550(purine ribonucleoside binding);GO:0036094(small …	ko04144(Endocytosis)
PC-3p-1355_7915	XM_016115615.2	641	661	652	-29.6	-19.6	0.662162	9	3-12,659-650;14-19,648-643	1-2,661-660[UP5];13-13,649-649[SIL];20-21,642-641[UP3]	..((((((.((((((((((..&..)))))))))).))))))..	UUCUUGGUGAAGCUCUUGCAU&UGGUAAGAGUUUGAUUAAGUA	0	0	NA	NA	NA	1	39.6024	4	0.9998	Output/R0h/cleaveLand_result/t_plot/PC-3p-1355_7915_XM_016115615.2_652_TPlot.pdf	0	39.6024	-Inf	down	3.1118e-10	6.0287e-10	yes	GO:1901576(organic substance biosynthetic process);GO:0005488(binding);GO:0051186(cofactor metabolic process);GO:0032787(monocarboxylic acid metabolic process);GO:0043167(ion binding);GO:0003824(catalytic activity);GO:0097367(carbohydrate derivative binding);GO:1901265(nucleoside phosphate binding);GO:0043168(anion binding);GO:0032559(adenyl ribonucleotide binding);GO:0044237(cellular metabolic p…	ko01100(Metabolic pathways);ko00630(Glyoxylate and dicarboxylate metabolism);ko00620(Pyruvate metabolism);ko01200(Carbon metabolism);ko00010(Glycolysis / Gluconeogenesis);ko00640(Propanoate metabolism);ko01110(Biosynthesis of secondary metabolites)
PC-3p-1355_7915	XM_016115744.2	680	700	691	-29.6	-20.6	0.695946	11	6-20,695-681	1-5,700-696[UP5];21-21,680-680[UP3]	.(((((((((((((((.....&.....))))))))))))))).	GACUUAAUCAAGCUCUAAUAA&UGGUAAGAGUUUGAUUAAGUA	1	32.684	4	0.983133	Output/R8h/cleaveLand_result/t_plot/PC-3p-1355_7915_XM_016115744.2_691_TPlot.pdf	1	39.6024	4	0.966088	Output/R0h/cleaveLand_result/t_plot/PC-3p-1355_7915_XM_016115744.2_691_TPlot.pdf	32.684	39.6024	-0.277003	down	0.4158	0.417305	yes	GO:0016875(ligase activity, forming carbon-oxygen bonds);GO:0006418(tRNA aminoacylation for protein translation);GO:0036094(small molecule binding);GO:0043168(anion binding);GO:0044267(cellular protein metabolic process);GO:0032559(adenyl ribonucleotide binding);GO:0006520(cellular amino acid metabolic process);GO:0005623(cell);GO:0034641(cellular nitrogen compound metabolic process);GO:0006412(t…	ko00970(Aminoacyl-tRNA biosynthesis)
PC-3p-1355_7915	XM_016117018.2	553	573	564	-29.6	-19.5	0.658784	9	4-16,570-558;18-21,556-553	1-3,573-571[UP5];17-17,557-557[SIL]	((((.(((((((((((((...&...))))))))))))).))))	UGCUCGAUCAAGCUCUUGAUG&UGGUAAGAGUUUGAUUAAGUA	0	0	NA	NA	NA	1	39.6024	4	0.999937	Output/R0h/cleaveLand_result/t_plot/PC-3p-1355_7915_XM_016117018.2_564_TPlot.pdf	0	39.6024	-Inf	down	3.1118e-10	6.0287e-10	yes	NA	NA
PC-3p-1355_7915	XM_016117345.2	2392	2412	2403	-29.6	-20.8	0.702703	9	1-14,2412-2399	15-21,2398-2392[UP3]	.......((((((((((((((&)))))))))))))).......	ACCCCCUUCAGGCUCUUACCA&UGGUAAGAGUUUGAUUAAGUA	1	32.684	4	0.959031	Output/R8h/cleaveLand_result/t_plot/PC-3p-1355_7915_XM_016117345.2_2403_TPlot.pdf	0	0	NA	NA	NA	32.684	0	Inf	up	1.084e-08	1.2485e-08	yes	NA	ko00240(Pyrimidine metabolism);ko01100(Metabolic pathways);ko03010(Ribosome)
PC-3p-1355_7915	XM_021124710.1	3436	3456	3447	-29.6	-20.8	0.702703	7.5	2-5,3455-3452;7-19,3450-3438	1-1,3456-3456[UP5];6-6,3451-3451[SIL];20-21,3437-3436[UP3]	..(((((((((((((.((((.&.)))).)))))))))))))..	CCCUUAGUCAGACUCCUAUCG&UGGUAAGAGUUUGAUUAAGUA	1	32.684	4	0.967903	Output/R8h/cleaveLand_result/t_plot/PC-3p-1355_7915_XM_021124710.1_3447_TPlot.pdf	0	0	NA	NA	NA	32.684	0	Inf	up	1.084e-08	1.2485e-08	yes	GO:0044422(organelle part);GO:0006996(organelle organization);GO:0009629(response to gravity);GO:0043231(intracellular membrane-bounded organelle);GO:0009959(negative gravitropism);GO:0044437(vacuolar part);GO:0050896(response to stimulus);GO:0005737(cytoplasm);GO:0005623(cell);GO:0044446(intracellular organelle part);GO:0009657(plastid organization);GO:0044424(intracellular part);GO:0031090(orga…	ko03010(Ribosome);ko03060(Protein export)
PC-3p-1355_7915	XM_021125084.1	680	700	691	-29.6	-20.6	0.695946	11	6-20,695-681	1-5,700-696[UP5];21-21,680-680[UP3]	.(((((((((((((((.....&.....))))))))))))))).	GACUUAAUCAAGCUCUAAUAA&UGGUAAGAGUUUGAUUAAGUA	1	32.684	4	0.981972	Output/R8h/cleaveLand_result/t_plot/PC-3p-1355_7915_XM_021125084.1_691_TPlot.pdf	0	0	NA	NA	NA	32.684	0	Inf	up	1.084e-08	1.2485e-08	yes	GO:0016875(ligase activity, forming carbon-oxygen bonds);GO:0006418(tRNA aminoacylation for protein translation);GO:0036094(small molecule binding);GO:0043168(anion binding);GO:0044267(cellular protein metabolic process);GO:0032559(adenyl ribonucleotide binding);GO:0006520(cellular amino acid metabolic process);GO:0005623(cell);GO:0034641(cellular nitrogen compound metabolic process);GO:0006412(t…	ko00970(Aminoacyl-tRNA biosynthesis)
PC-3p-1355_7915	XM_021127205.1	3277	3298	3288	-29.6	-20.1	0.679054	7.5	2-9,3297-3290;10-17,3288-3281	1-1,3298-3298[UP5];x-x,3289-3289[BULt];18-21,3280-3277[UP3]	....((((((((.((((((((.&.))))))))-))))))))....	GAAGUGAUCAAAUCUCUUACCG&UGGUAAGAG-UUUGAUUAAGUA	0	0	NA	NA	NA	2	79.2048	2	0.838242	Output/R0h/cleaveLand_result/t_plot/PC-3p-1355_7915_XM_021127205.1_3288_TPlot.pdf	0	79.2048	-Inf	down	5.5905e-19	3.89431e-18	yes	GO:0043167(ion binding);GO:0043169(cation binding);GO:0046872(metal ion binding);GO:0005488(binding)	ko04120(Ubiquitin mediated proteolysis)
PC-3p-1355_7915	XM_021128831.1	1066	1087	1078	-29.6	-19.7	0.665541	6.5	1-11,1087-1077;13-18,1075-1070;19-20,1068-1067	12-12,1076-1076[SIL];x-x,1069-1069[BULt];21-21,1066-1066[UP3]	.((.((((((.(((((((((((&))))))))))).))))))-)).	CACGUUGAUCCAGCUCUUACUA&UGGUAAGAGUUUGAUUAA-GUA	1	32.684	4	0.999956	Output/R8h/cleaveLand_result/t_plot/PC-3p-1355_7915_XM_021128831.1_1078_TPlot.pdf	0	0	NA	NA	NA	32.684	0	Inf	up	1.084e-08	1.2485e-08	yes	NA	NA
PC-3p-1355_7915	XM_021129324.1	2859	2879	2870	-29.6	-19.7	0.665541	8.5	3-18,2877-2862	1-2,2879-2878[UP5];19-21,2861-2859[UP3]	...((((((((((((((((..&..))))))))))))))))...	CCAUUAGUCAAGCUCUUAUAU&UGGUAAGAGUUUGAUUAAGUA	1	32.684	4	0.999957	Output/R8h/cleaveLand_result/t_plot/PC-3p-1355_7915_XM_021129324.1_2870_TPlot.pdf	3	118.807	2	0.919209	Output/R0h/cleaveLand_result/t_plot/PC-3p-1355_7915_XM_021129324.1_2870_TPlot.pdf	32.684	118.807	-1.86197	down	2.6057e-12	1.10202e-11	yes	GO:0016887(ATPase activity);GO:0009058(biosynthetic process);GO:1901566(organonitrogen compound biosynthetic process);GO:1901293(nucleoside phosphate biosynthetic process);GO:0032553(ribonucleotide binding);GO:0009127(purine nucleoside monophosphate biosynthetic process);GO:0055086(nucleobase-containing small molecule metabolic process);GO:0055085(transmembrane transport);GO:0003824(catalytic act…	ko00190(Oxidative phosphorylation)
PC-3p-1355_7915	XM_021132553.1	880	908	899	-29.6	-19.3	0.652027	11.5	1-13,908-896;14-21,887-880	x-x,895-888[BULt]	((((((((........(((((((((((((&)))))))))))))--------))))))))	UGCUUGAUGAGUUCACUAGAUUCUUACCA&UGGUAAGAGUUUG--------AUUAAGUA	1	32.684	4	0.999998	Output/R8h/cleaveLand_result/t_plot/PC-3p-1355_7915_XM_021132553.1_899_TPlot.pdf	0	0	NA	NA	NA	32.684	0	Inf	up	1.084e-08	1.2485e-08	yes	GO:0031327(negative regulation of cellular biosynthetic process);GO:1903507(negative regulation of nucleic acid-templated transcription);GO:0006355(regulation of transcription, DNA-templated);GO:0070013(intracellular organelle lumen);GO:0016043(cellular component organization);GO:0051276(chromosome organization);GO:0051252(regulation of RNA metabolic process);GO:0044464(cell part);GO:0044428(nucl…	NA
PC-3p-1355_7915	XM_021132556.1	990	1018	1009	-29.6	-19.3	0.652027	11.5	1-13,1018-1006;14-21,997-990	x-x,1005-998[BULt]	((((((((........(((((((((((((&)))))))))))))--------))))))))	UGCUUGAUGAGUUCACUAGAUUCUUACCA&UGGUAAGAGUUUG--------AUUAAGUA	1	32.684	4	0.999999	Output/R8h/cleaveLand_result/t_plot/PC-3p-1355_7915_XM_021132556.1_1009_TPlot.pdf	0	0	NA	NA	NA	32.684	0	Inf	up	1.084e-08	1.2485e-08	yes	GO:0031327(negative regulation of cellular biosynthetic process);GO:1903507(negative regulation of nucleic acid-templated transcription);GO:0006355(regulation of transcription, DNA-templated);GO:0070013(intracellular organelle lumen);GO:0016043(cellular component organization);GO:0051276(chromosome organization);GO:0051252(regulation of RNA metabolic process);GO:0044464(cell part);GO:0044428(nucl…	NA
PC-3p-1355_7915	XM_021134585.1	677	698	689	-29.6	-20.5	0.692568	9	3-17,696-682;18-20,680-678	1-2,698-697[UP5];x-x,681-681[BULt];21-21,677-677[UP3]	.(((.(((((((((((((((..&..)))))))))))))))-))).	GGCUGUGAUCAGAUUCUUGCGG&UGGUAAGAGUUUGAUUA-AGUA	1	32.684	4	0.989648	Output/R8h/cleaveLand_result/t_plot/PC-3p-1355_7915_XM_021134585.1_689_TPlot.pdf	0	0	NA	NA	NA	32.684	0	Inf	up	1.084e-08	1.2485e-08	yes	GO:0046914(transition metal ion binding);GO:0016853(isomerase activity);GO:0044237(cellular metabolic process);GO:0003676(nucleic acid binding);GO:0043226(organelle);GO:0090304(nucleic acid metabolic process);GO:0009987(cellular process);GO:0046872(metal ion binding);GO:0003917(DNA topoisomerase type I activity);GO:0006265(DNA topological change);GO:0046483(heterocycle metabolic process);GO:00432…	ko03440(Homologous recombination)
PC-3p-1355_7915	XM_021136611.1	538	558	549	-29.6	-19.8	0.668919	7.5	2-12,557-547;14-20,545-539	1-1,558-558[UP5];13-13,546-546[SIL];21-21,538-538[UP3]	.(((((((.(((((((((((.&.))))))))))).))))))).	AGCUUGGUGGAACUCUUGUCU&UGGUAAGAGUUUGAUUAAGUA	0	0	NA	NA	NA	1	39.6024	4	0.999407	Output/R0h/cleaveLand_result/t_plot/PC-3p-1355_7915_XM_021136611.1_549_TPlot.pdf	0	39.6024	-Inf	down	3.1118e-10	6.0287e-10	yes	GO:0016020(membrane);GO:0005215(transporter activity);GO:0044425(membrane part);GO:0016021(integral component of membrane);GO:0051179(localization);GO:0005886(plasma membrane);GO:0055085(transmembrane transport);GO:0005623(cell);GO:0031224(intrinsic component of membrane);GO:0006810(transport);GO:0051234(establishment of localization);GO:0044464(cell part);GO:0022857(transmembrane transporter act…	ko00909(Sesquiterpenoid and triterpenoid biosynthesis);ko00100(Steroid biosynthesis);ko01110(Biosynthesis of secondary metabolites);ko01100(Metabolic pathways)
PC-3p-1355_7915	XM_021138053.1	2043	2072	2063	-29.6	-19.3	0.652027	14	1-13,2072-2060;14-20,2050-2044	x-x,2059-2051[BULt];21-21,2043-2043[UP3]	.(((((((.........(((((((((((((&)))))))))))))---------))))))).	GGCUUGAUGAAGACAUCCGAACUCUUGCUA&UGGUAAGAGUUUG---------AUUAAGUA	0	0	NA	NA	NA	1	39.6024	4	0.999989	Output/R0h/cleaveLand_result/t_plot/PC-3p-1355_7915_XM_021138053.1_2063_TPlot.pdf	0	39.6024	-Inf	down	3.1118e-10	6.0287e-10	yes	GO:0098791(Golgi subcompartment);GO:0005622(intracellular);GO:0045229(external encapsulating structure organization);GO:0044431(Golgi apparatus part);GO:0012505(endomembrane system);GO:0098588(bounding membrane of organelle);GO:0005623(cell);GO:0016740(transferase activity);GO:0016043(cellular component organization);GO:0031090(organelle membrane);GO:0044425(membrane part);GO:0016020(membrane);GO…	NA
PC-3p-1355_7915	XM_021141388.1	830	849	840	-29.6	-20.2	0.682432	5.5	2-14,848-836;18-21,833-830	1-1,849-849[UP5];15-17,835-834[AILq]	((((..-(((((((((((((.&.)))))))))))))...))))	UGCUGC-UCAAACUUUUACCU&UGGUAAGAGUUUGAUUAAGUA	1	32.684	4	0.999014	Output/R8h/cleaveLand_result/t_plot/PC-3p-1355_7915_XM_021141388.1_840_TPlot.pdf	0	0	NA	NA	NA	32.684	0	Inf	up	1.084e-08	1.2485e-08	yes	GO:0044237(cellular metabolic process);GO:0008152(metabolic process);GO:0044260(cellular macromolecule metabolic process);GO:0016740(transferase activity);GO:0006468(protein phosphorylation);GO:0044267(cellular protein metabolic process);GO:0036211(protein modification process);GO:0097159(organic cyclic compound binding);GO:1901564(organonitrogen compound metabolic process);GO:0016301(kinase acti…	ko04626(Plant-pathogen interaction)
PC-3p-1355_7915	XM_021142387.1	2539	2560	2551	-29.6	-21.3	0.719595	5	1-12,2560-2549;13-15,2547-2545;17-21,2543-2539	x-x,2548-2548[BULt];16-16,2544-2544[SIL]	(((((.(((.((((((((((((&))))))))))))-))).)))))	UACUUUGUUAAAGCUCUUACCA&UGGUAAGAGUUU-GAUUAAGUA	1	32.684	4	0.912889	Output/R8h/cleaveLand_result/t_plot/PC-3p-1355_7915_XM_021142387.1_2551_TPlot.pdf	0	0	NA	NA	NA	32.684	0	Inf	up	1.084e-08	1.2485e-08	yes	GO:0043231(intracellular membrane-bounded organelle);GO:0043229(intracellular organelle);GO:0005622(intracellular);GO:0044424(intracellular part);GO:0005623(cell);GO:0005634(nucleus);GO:0044464(cell part);GO:0043226(organelle);GO:0005737(cytoplasm);GO:0043227(membrane-bounded organelle)	ko03018(RNA degradation)
PC-3p-139105_48	XM_016087645.2	262	287	279	-46.1	-31	0.672451	13	1-2,287-286;4-4,285-285;6-11,283-278;12-23,274-263	3-3,x-x[BULq];5-5,284-284[SIL];x-x,277-275[BULt];24-24,262-262[UP3]	.((((((((((((...((((((.(-((&)).).))))))---)))))))))))).	UGGGUGCGAGUCGGAAGCUUCAGG-GA&UCACGUGAAGU---CGACUUGCACCUG	0	0	NA	NA	NA	1	39.6024	4	0.691811	Output/R0h/cleaveLand_result/t_plot/PC-3p-139105_48_XM_016087645.2_279_TPlot.pdf	0	39.6024	-Inf	down	3.1118e-10	6.0287e-10	yes	GO:2000112(regulation of cellular macromolecule biosynthetic process);GO:0044464(cell part);GO:0051246(regulation of protein metabolic process);GO:0044248(cellular catabolic process);GO:0043228(non-membrane-bounded organelle);GO:0005737(cytoplasm);GO:0019439(aromatic compound catabolic process);GO:0006139(nucleobase-containing compound metabolic process);GO:0043170(macromolecule metabolic process…	ko03018(RNA degradation)
[truncated: 15,834 more rows]
