# Supplementary material for: Integration of Small RNA and Degradome Sequencing Reveals the Regulatory Network of Al-Induced Programmed Cell Death in Peanut
Source: Int J Mol Sci. 2021 Dec 27;23(1):246. doi: 10.3390/ijms23010246 (PMC8745729; doi:10.3390/ijms23010246)
Supplement: Supplementary file 1 [file ijms-23-00246-s001.zip › Table S5-3 The predicted targets of known and novel miRNAs in T24hvsT0h.xlsx]

## Sheet: R0hvsR24h
Table S5-3 The predicted targets of known and novel miRNAs in T24hvsT0h
Item	Description
TStart	Start position of mRNA and miRNA alignment region
TStop	End position of mRNA and miRNA alignment region
TSlice	Degradation site
AllenScore	Penalty score of mismatched bases between the miRNA and its target (the lower the value, the better)
Paired	Paired position (format is miRNA (5 '- 3'), mRNA (3 '- 5'), " ;" for segmentation.)
Unpaired	Unpaired position
Structure	Secondary structure
DegradomeCategory	Category 0:over one raw read at the position, abundance at the position is equal to the maximum on the transcript, and there is only one maximum on the transcript
	Category 1:over one raw read at the position, abundance at the position is equal to the maximum on the transcript, and there is more than one maximum position on the transcript
	Category 2:over one raw read at the position, abundance at position is less than the maximum but higher than the median for the transcript
	Category 3:over one raw read at the position, abundance at the position is equal to or less than the median for the transcript
	Category 4:only one raw read at the position
Query	Transcript	TStart	TStop	TSlice	MFEperfect	MFEsite	MFEratio	AllenScore	Paired	Unpaired	Structure	Sequence	DegradomeRawReads(R24h)	DegradomeNormReads(R24h)	DegradomeCategory(R24h)	DegradomePval(R24h)	Tplot_file_path(R24h)	DegradomeRawReads(R0h)	DegradomeNormReads(R0h)	DegradomeCategory(R0h)	DegradomePval(R0h)	Tplot_file_path(R0h)	T24h	T0h	log2(fold_change)	regulation	pvalue	qvalue	significant	GO	KEGG
PC-3p-100264_81	XM_016079281.2	2048	2074	2065	-52.3	-34.8	0.665392	10.5	3-14,2072-2061;15-18,2059-2056;19-23,2053-2049	1-2,2074-2073[UP5];x-x,2060-2060[BULt];x-x,2055-2054[BULt];24-24,2048-2048[UP3]	.(((((..((((.((((((((((((..&..))))))))))))-))))--))))).	UGCUGCCCAGGCACAGGUUGAGGCUGU&UUGGCCUUAGCCUG-GCCU--GUAGCC	1	32.4181	4	0.952889	Output/R24h/cleaveLand_result/t_plot/PC-3p-100264_81_XM_016079281.2_2065_TPlot.pdf	0	0	NA	NA	NA	32.4181	0	Inf	up	1.2429e-08	1.41251e-08	yes	GO:0051640(organelle localization);GO:0051649(establishment of localization in cell);GO:0019750(chloroplast localization);GO:0051179(localization);GO:0051234(establishment of localization);GO:0005829(cytosol);GO:0005623(cell);GO:0009904(chloroplast accumulation movement);GO:0009987(cellular process);GO:0051644(plastid localization);GO:0044444(cytoplasmic part);GO:0016043(cellular component organi…	NA
PC-3p-100264_81	XM_016082553.2	1429	1452	1443	-52.3	-34.7	0.66348	9	2-8,1451-1445;10-13,1443-1440;16-20,1437-1433;22-24,1431-1429	1-1,1452-1452[UP5];9-9,1444-1444[SIL];14-15,1439-1438[SIL];21-21,1432-1432[SIL]	(((.(((((..((((.(((((((.&.))))))).))))..))))).)))	GGCCGCGGGAAAGGCCGGGGCCAU&UUGGCCUUAGCCUGGCCUGUAGCC	1	32.4181	4	0.962558	Output/R24h/cleaveLand_result/t_plot/PC-3p-100264_81_XM_016082553.2_1443_TPlot.pdf	0	0	NA	NA	NA	32.4181	0	Inf	up	1.2429e-08	1.41251e-08	yes	GO:0005215(transporter activity);GO:0022857(transmembrane transporter activity);GO:0015291(secondary active transmembrane transporter activity);GO:0006811(ion transport);GO:0006817(phosphate ion transport);GO:0051234(establishment of localization);GO:0031224(intrinsic component of membrane);GO:0055085(transmembrane transport);GO:0016020(membrane);GO:0015698(inorganic anion transport);GO:0022804(a…	NA
PC-3p-100264_81	XM_016082554.2	1544	1567	1558	-52.3	-34.7	0.66348	9	2-8,1566-1560;10-13,1558-1555;16-20,1552-1548;22-24,1546-1544	1-1,1567-1567[UP5];9-9,1559-1559[SIL];14-15,1554-1553[SIL];21-21,1547-1547[SIL]	(((.(((((..((((.(((((((.&.))))))).))))..))))).)))	GGCCGCGGGAAAGGCCGGGGCCAU&UUGGCCUUAGCCUGGCCUGUAGCC	1	32.4181	4	0.966621	Output/R24h/cleaveLand_result/t_plot/PC-3p-100264_81_XM_016082554.2_1558_TPlot.pdf	0	0	NA	NA	NA	32.4181	0	Inf	up	1.2429e-08	1.41251e-08	yes	GO:0005215(transporter activity);GO:0022857(transmembrane transporter activity);GO:0015291(secondary active transmembrane transporter activity);GO:0006811(ion transport);GO:0006817(phosphate ion transport);GO:0051234(establishment of localization);GO:0031224(intrinsic component of membrane);GO:0055085(transmembrane transport);GO:0016020(membrane);GO:0015698(inorganic anion transport);GO:0022804(a…	NA
PC-3p-100264_81	XM_016083974.2	1332	1355	1346	-52.3	-34.3	0.655832	11	4-6,1352-1350;8-20,1348-1336;22-23,1334-1333	1-3,1355-1353[UP5];7-7,1349-1349[SIL];21-21,1335-1335[SIL];24-24,1332-1332[UP3]	.((.(((((((((((((.(((...&...))).))))))))))))).)).	CGCGGCAGGUCAGGCUGCGGCAUA&UUGGCCUUAGCCUGGCCUGUAGCC	1	32.4181	4	0.985062	Output/R24h/cleaveLand_result/t_plot/PC-3p-100264_81_XM_016083974.2_1346_TPlot.pdf	0	0	NA	NA	NA	32.4181	0	Inf	up	1.2429e-08	1.41251e-08	yes	GO:0006810(transport);GO:0044425(membrane part);GO:0032559(adenyl ribonucleotide binding);GO:0022857(transmembrane transporter activity);GO:0017076(purine nucleotide binding);GO:0097367(carbohydrate derivative binding);GO:1901363(heterocyclic compound binding);GO:0042626(ATPase activity, coupled to transmembrane movement of substances);GO:0032553(ribonucleotide binding);GO:0000166(nucleotide bind…	ko02010(ABC transporters)
PC-3p-100264_81	XM_016087415.2	1036	1058	1050	-52.3	-34.3	0.655832	9.5	2-8,1057-1051;11-12,1049-1048;14-23,1046-1037	1-1,1058-1058[UP5];9-10,1050-1050[AILq];13-13,1047-1047[SIL];24-24,1036-1036[UP3]	.((((((((((.((.-(((((((.&.)))))))..)).)))))))))).	AGCUGCGGGCUUGGG-GAGGCCAU&UUGGCCUUAGCCUGGCCUGUAGCC	6	194.508	2	0.755288	Output/R24h/cleaveLand_result/t_plot/PC-3p-100264_81_XM_016087415.2_1050_TPlot.pdf	0	0	NA	NA	NA	194.508	0	Inf	up	3.2672e-44	1.69138e-42	yes	NA	ko00750(Vitamin B6 metabolism)
PC-3p-100264_81	XM_016098671.2	589	612	603	-52.3	-34.3	0.655832	5.5	1-12,612-601;14-16,600-598;17-18,596-595;20-20,593-593;22-24,591-589	13-13,x-x[BULq];x-x,597-597[BULt];19-19,594-594[SIL];21-21,592-592[SIL]	(((.(.((.(((-((((((((((((&)))))))))))).)))-)).).)))	GGCAAGAGAGCU-GGCUGAGGCCAA&UUGGCCUUAGCCUGGC-CUGUAGCC	0	0	NA	NA	NA	1	39.6024	4	0.966088	Output/R0h/cleaveLand_result/t_plot/PC-3p-100264_81_XM_016098671.2_603_TPlot.pdf	0	39.6024	-Inf	down	3.1118e-10	6.0515e-10	yes	GO:0016021(integral component of membrane);GO:0031224(intrinsic component of membrane);GO:0044425(membrane part);GO:0016020(membrane)	NA
PC-3p-100264_81	XM_016100348.2	746	775	761	-52.3	-35.8	0.684512	15.5	2-7,774-769;8-9,763-762;11-14,760-757;15-24,755-746	1-1,775-775[UP5];x-x,768-764[BULt];10-10,761-761[SIL];x-x,756-756[BULt]	((((((((((.((((.((.....((((((.&.))))))-----)).))))-))))))))))	GGCUGCGGGUACAGGGUACUGGAAGGCCAC&UUGGCCU-----UAGCCUG-GCCUGUAGCC	0	0	NA	NA	NA	5	198.012	2	0.279403	Output/R0h/cleaveLand_result/t_plot/PC-3p-100264_81_XM_016100348.2_761_TPlot.pdf	0	198.012	-Inf	down	5.6156e-45	3.29337e-43	yes	GO:0071704(organic substance metabolic process);GO:0044271(cellular nitrogen compound biosynthetic process);GO:1901360(organic cyclic compound metabolic process);GO:0044260(cellular macromolecule metabolic process);GO:0034654(nucleobase-containing compound biosynthetic process);GO:0008152(metabolic process);GO:0034641(cellular nitrogen compound metabolic process);GO:0009059(macromolecule biosynth…	ko03015(mRNA surveillance pathway);ko03018(RNA degradation);ko04120(Ubiquitin mediated proteolysis);ko00561(Glycerolipid metabolism);ko03013(RNA transport);ko01100(Metabolic pathways);ko04141(Protein processing in endoplasmic reticulum)
PC-3p-100264_81	XM_016102022.2	1217	1240	1231	-52.3	-34	0.650096	7.5	2-9,1239-1232;11-20,1230-1221;22-23,1219-1218	1-1,1240-1240[UP5];10-10,1231-1231[SIL];21-21,1220-1220[SIL];24-24,1217-1217[UP3]	.((.((((((((((.((((((((.&.)))))))).)))))))))).)).	UGUAGCAGGUCAGGAUAGGGCCAU&UUGGCCUUAGCCUGGCCUGUAGCC	1	32.4181	4	0.99404	Output/R24h/cleaveLand_result/t_plot/PC-3p-100264_81_XM_016102022.2_1231_TPlot.pdf	0	0	NA	NA	NA	32.4181	0	Inf	up	1.2429e-08	1.41251e-08	yes	NA	ko00511(Other glycan degradation)
PC-3p-100264_81	XM_016102023.2	1229	1252	1243	-52.3	-34	0.650096	7.5	2-9,1251-1244;11-20,1242-1233;22-23,1231-1230	1-1,1252-1252[UP5];10-10,1243-1243[SIL];21-21,1232-1232[SIL];24-24,1229-1229[UP3]	.((.((((((((((.((((((((.&.)))))))).)))))))))).)).	UGUAGCAGGUCAGGAUAGGGCCAU&UUGGCCUUAGCCUGGCCUGUAGCC	2	64.8361	2	0.81365	Output/R24h/cleaveLand_result/t_plot/PC-3p-100264_81_XM_016102023.2_1243_TPlot.pdf	0	0	NA	NA	NA	64.8361	0	Inf	up	8.1306e-16	3.55976e-15	yes	NA	ko00511(Other glycan degradation)
PC-3p-100264_81	XM_016103586.2	1592	1615	1607	-52.3	-34.38	0.657361	7.5	1-8,1615-1608;10-15,1607-1602;16-17,1600-1599;21-24,1595-1592	9-9,x-x[BULq];x-x,1601-1601[BULt];18-20,1598-1596[SIL]	((((...((.((((((-((((((((&)))))))).))))))-))...))))	GGCUUGUGGUCCGGGC-AGGGCCAA&UUGGCCUUAGCCUGG-CCUGUAGCC	1	32.4181	4	0.979395	Output/R24h/cleaveLand_result/t_plot/PC-3p-100264_81_XM_016103586.2_1607_TPlot.pdf	0	0	NA	NA	NA	32.4181	0	Inf	up	1.2429e-08	1.41251e-08	yes	GO:0003824(catalytic activity);GO:0005886(plasma membrane);GO:0005623(cell);GO:0001871(pattern binding);GO:0044464(cell part);GO:0016021(integral component of membrane);GO:0030246(carbohydrate binding);GO:0016798(hydrolase activity, acting on glycosyl bonds);GO:0044425(membrane part);GO:0044459(plasma membrane part);GO:0030247(polysaccharide binding);GO:0071704(organic substance metabolic process…	ko00500(Starch and sucrose metabolism)
PC-3p-100264_81	XM_016113267.2	2913	2944	2935	-52.3	-35.8	0.684512	10.5	1-14,2944-2931;15-16,2928-2927;17-18,2925-2924;19-24,2918-2913	x-x,2930-2929[BULt];x-x,2926-2926[BULt];x-x,2923-2919[BULt]	((((((.....((.((..((((((((((((((&))))))))))))))--))-))-----))))))	GGCUAUGAAAUGGAGCAUCAGGCUGAGGCCAG&UUGGCCUUAGCCUG--GC-CU-----GUAGCC	0	0	NA	NA	NA	1	39.6024	4	0.72401	Output/R0h/cleaveLand_result/t_plot/PC-3p-100264_81_XM_016113267.2_2935_TPlot.pdf	0	39.6024	-Inf	down	3.1118e-10	6.0515e-10	yes	GO:0044238(primary metabolic process);GO:0044260(cellular macromolecule metabolic process);GO:0043231(intracellular membrane-bounded organelle);GO:0016311(dephosphorylation);GO:0043226(organelle);GO:0005622(intracellular);GO:0044267(cellular protein metabolic process);GO:0043412(macromolecule modification);GO:0005623(cell);GO:0004721(phosphoprotein phosphatase activity);GO:0003824(catalytic activ…	ko03013(RNA transport);ko03040(Spliceosome);ko03015(mRNA surveillance pathway)
PC-3p-100264_81	XM_016114588.2	476	499	490	-52.3	-34.6	0.661568	8.5	1-11,499-489;12-13,487-486;15-18,484-481;22-24,478-476	x-x,488-488[BULt];14-14,485-485[SIL];19-21,480-479[AILq]	(((..-((((.((.(((((((((((&)))))))))))-)).))))...)))	GGCGA-GGGCGGGCGUUAAGGCCAG&UUGGCCUUAGC-CUGGCCUGUAGCC	1	32.4181	4	0.967379	Output/R24h/cleaveLand_result/t_plot/PC-3p-100264_81_XM_016114588.2_490_TPlot.pdf	0	0	NA	NA	NA	32.4181	0	Inf	up	1.2429e-08	1.41251e-08	yes	GO:0046395(carboxylic acid catabolic process);GO:0045548(phenylalanine ammonia-lyase activity);GO:0003824(catalytic activity);GO:0044424(intracellular part);GO:0016840(carbon-nitrogen lyase activity);GO:0009698(phenylpropanoid metabolic process);GO:0006807(nitrogen compound metabolic process);GO:0008152(metabolic process);GO:1901564(organonitrogen compound metabolic process);GO:0009063(cellular a…	ko01100(Metabolic pathways);ko00360(Phenylalanine metabolism);ko00940(Phenylpropanoid biosynthesis);ko01110(Biosynthesis of secondary metabolites)
PC-3p-100264_81	XM_016117982.2	482	506	496	-52.3	-34	0.650096	9	3-6,504-501;7-13,499-493;14-19,491-486;21-24,485-482	1-2,506-505[UP5];x-x,500-500[BULt];x-x,492-492[BULt];20-20,x-x[BULq]	((((-((((((.(((((((.((((..&..))))-)))))))-)))))).))))	GGUU-CGGGCCGAGGCUAACGGCUCC&UUGGCC-UUAGCCU-GGCCUGUAGCC	0	0	NA	NA	NA	1	39.6024	4	0.984046	Output/R0h/cleaveLand_result/t_plot/PC-3p-100264_81_XM_016117982.2_496_TPlot.pdf	0	39.6024	-Inf	down	3.1118e-10	6.0515e-10	yes	GO:0005488(binding);GO:0097159(organic cyclic compound binding);GO:1901363(heterocyclic compound binding)	ko03040(Spliceosome)
PC-3p-100264_81	XM_021127228.1	482	506	496	-52.3	-34	0.650096	9	3-6,504-501;7-13,499-493;14-19,491-486;21-24,485-482	1-2,506-505[UP5];x-x,500-500[BULt];x-x,492-492[BULt];20-20,x-x[BULq]	((((-((((((.(((((((.((((..&..))))-)))))))-)))))).))))	GGUU-CGGGCCGAGGCUAACGGCUCC&UUGGCC-UUAGCCU-GGCCUGUAGCC	0	0	NA	NA	NA	2	79.2048	2	0.714971	Output/R0h/cleaveLand_result/t_plot/PC-3p-100264_81_XM_021127228.1_496_TPlot.pdf	0	79.2048	-Inf	down	5.5905e-19	3.88279e-18	yes	GO:0005488(binding);GO:0097159(organic cyclic compound binding);GO:1901363(heterocyclic compound binding)	ko03040(Spliceosome)
PC-3p-101862_79	XM_016096771.2	852	878	866	-45.4	-31.5	0.693833	14	1-4,878-875;7-8,872-871;9-23,867-853	5-6,874-873[SIL];x-x,870-868[BULt];24-24,852-852[UP3]	.(((((((((((((((...((..((((&))))..))---))))))))))))))).	CGGUGGAUUCGGGUGCUGCGGAGGGCU&AGUCGACU---GCACCUGAAUUCACCU	2	64.8361	2	0.277783	Output/R24h/cleaveLand_result/t_plot/PC-3p-101862_79_XM_016096771.2_866_TPlot.pdf	0	0	NA	NA	NA	64.8361	0	Inf	up	8.1306e-16	3.55976e-15	yes	GO:0044260(cellular macromolecule metabolic process);GO:0006470(protein dephosphorylation);GO:1901564(organonitrogen compound metabolic process);GO:0006807(nitrogen compound metabolic process);GO:0008152(metabolic process);GO:0006796(phosphate-containing compound metabolic process);GO:0016787(hydrolase activity);GO:0009987(cellular process);GO:0044237(cellular metabolic process);GO:0044238(primar…	NA
PC-3p-101862_79	XM_021139518.1	1868	1893	1884	-45.4	-40	0.881057	3	1-16,1893-1878;18-24,1874-1868	17-17,1877-1875[AILt]	(((((((...((((((((((((((((&))))))))))))))))--.)))))))	AGGUGAAAACUCAGGUGCAGUCGACU&AGUCGACUGCACCUGA--AUUCACCU	1	32.4181	4	0.0449041	Output/R24h/cleaveLand_result/t_plot/PC-3p-101862_79_XM_021139518.1_1884_TPlot.pdf	0	0	NA	NA	NA	32.4181	0	Inf	up	1.2429e-08	1.41251e-08	yes	GO:0046872(metal ion binding);GO:0019748(secondary metabolic process);GO:0046906(tetrapyrrole binding);GO:0020037(heme binding);GO:0016491(oxidoreductase activity);GO:0016709(oxidoreductase activity, acting on paired donors, with incorporation or reduction of molecular oxygen, NAD(P)H as one donor, and incorporation of one atom of oxygen);GO:0016021(integral component of membrane);GO:0044550(seco…	ko01110(Biosynthesis of secondary metabolites);ko00380(Tryptophan metabolism);ko00591(Linoleic acid metabolism);ko00232(Caffeine metabolism);ko01100(Metabolic pathways)
PC-3p-104925_76	XM_016095692.2	1297	1321	1312	-36.9	-25	0.677507	6	1-17,1321-1305;18-22,1303-1299	x-x,1304-1304[BULt];23-24,1298-1297[UP3]	..(((((.(((((((((((((((((&)))))))))))))))))-)))))..	AUAUUUAUGGUACAGUUGAUUUCAU&AUGAAAUUGACUGUACC-UGAGUUU	1	32.4181	4	0.921908	Output/R24h/cleaveLand_result/t_plot/PC-3p-104925_76_XM_016095692.2_1312_TPlot.pdf	0	0	NA	NA	NA	32.4181	0	Inf	up	1.2429e-08	1.41251e-08	yes	GO:0046910(pectinesterase inhibitor activity);GO:0030312(external encapsulating structure);GO:0045490(pectin catabolic process);GO:0016052(carbohydrate catabolic process);GO:0009987(cellular process);GO:0016788(hydrolase activity, acting on ester bonds);GO:0009056(catabolic process);GO:0030599(pectinesterase activity);GO:0043086(negative regulation of catalytic activity);GO:0044238(primary metabo…	ko00040(Pentose and glucuronate interconversions);ko01100(Metabolic pathways)
PC-3p-104925_76	XM_021127277.1	108	136	127	-36.9	-26.8	0.726287	16	2-11,135-126;12-21,120-111	1-1,136-136[UP5];x-x,125-121[BULt];22-24,110-108[UP3]	...((((((((((.....((((((((((.&.))))))))))-----))))))))))...	UGCCUCAGGUACGGUUACGUCAGUUUCAA&AUGAAAUUGAC-----UGUACCUGAGUUU	1	32.4181	4	0.847971	Output/R24h/cleaveLand_result/t_plot/PC-3p-104925_76_XM_021127277.1_127_TPlot.pdf	0	0	NA	NA	NA	32.4181	0	Inf	up	1.2429e-08	1.41251e-08	yes	GO:0009987(cellular process);GO:0071704(organic substance metabolic process);GO:1903047(mitotic cell cycle process);GO:0051716(cellular response to stimulus);GO:0032559(adenyl ribonucleotide binding);GO:0005488(binding);GO:0005622(intracellular);GO:0005524(ATP binding);GO:0022402(cell cycle process);GO:0044237(cellular metabolic process);GO:0006974(cellular response to DNA damage stimulus);GO:000…	NA
PC-3p-105086_75	XM_016088691.2	1028	1053	1043	-41.8	-27.2	0.650718	7	1-3,1053-1051;4-16,1049-1037;17-19,1035-1033;21-23,1031-1029	x-x,1050-1050[BULt];x-x,1036-1036[BULt];20-20,1032-1032[SIL];24-24,1028-1028[UP3]	.(((.(((.(((((((((((((.(((&)))-)))))))))))))-))).))).	UACUAAGGUUGUAGUUGACUUCAAUG&CGU-GAAGUCGACUACA-CCUAAGUU	2	64.8361	2	0.293996	Output/R24h/cleaveLand_result/t_plot/PC-3p-105086_75_XM_016088691.2_1043_TPlot.pdf	2	79.2048	2	0.225452	Output/R0h/cleaveLand_result/t_plot/PC-3p-105086_75_XM_016088691.2_1043_TPlot.pdf	64.8361	79.2048	-0.28879	down	0.2312	0.241796	yes	GO:0034641(cellular nitrogen compound metabolic process);GO:0046483(heterocycle metabolic process);GO:0006366(transcription from RNA polymerase II promoter);GO:0009058(biosynthetic process);GO:0006367(transcription initiation from RNA polymerase II promoter);GO:0003723(RNA binding);GO:0009059(macromolecule biosynthetic process);GO:1901576(organic substance biosynthetic process);GO:0003677(DNA bin…	ko03022(Basal transcription factors)
PC-3p-1060_9765	XM_016079474.2	1989	2009	2000	-37	-25.5	0.689189	8	1-5,2009-2005;7-8,2003-2002;10-19,2000-1991	6-6,2004-2004[SIL];9-9,2001-2001[SIL];20-21,1990-1989[UP3]	..((((((((((.((.(((((&))))).)).))))))))))..	UUGCUGUUCUUUGGAUGUAGG&CCUAUUUCGGAAGAACAGCCA	0	0	NA	NA	NA	1	39.6024	4	0.629584	Output/R0h/cleaveLand_result/t_plot/PC-3p-1060_9765_XM_016079474.2_2000_TPlot.pdf	0	39.6024	-Inf	down	3.1118e-10	6.0515e-10	yes	GO:0097367(carbohydrate derivative binding);GO:0031984(organelle subcompartment);GO:0016021(integral component of membrane);GO:0043229(intracellular organelle);GO:0044425(membrane part);GO:0043226(organelle);GO:1901265(nucleoside phosphate binding);GO:0005488(binding);GO:0031224(intrinsic component of membrane);GO:0055114(oxidation-reduction process);GO:0005622(intracellular);GO:0016653(oxidoredu…	NA
PC-3p-1060_9765	XM_016082100.2	414	442	425	-37	-26.1	0.705405	18.5	1-6,442-437;7-8,429-428;9-21,426-414	x-x,436-430[BULt];x-x,427-427[BULt]	(((((((((((((.((.......((((((&))))))-------))-)))))))))))))	UGGCUGUUUUUCCUGAAUCACUGGAUGGG&CCUAUU-------UC-GGAAGAACAGCCA	1	32.4181	4	0.410423	Output/R24h/cleaveLand_result/t_plot/PC-3p-1060_9765_XM_016082100.2_425_TPlot.pdf	1	39.6024	4	0.344921	Output/R0h/cleaveLand_result/t_plot/PC-3p-1060_9765_XM_016082100.2_425_TPlot.pdf	32.4181	39.6024	-0.28879	down	0.39723	0.398704	yes	NA	NA
PC-3p-1060_9765	XM_016086384.2	388	408	399	-37	-24.74	0.668649	11	1-10,408-399;16-20,393-389	11-15,398-394[SIL];21-21,388-388[UP3]	.(((((.....((((((((((&)))))))))).....))))).	AGGCUGACAUGCCGGAGUGGG&CCUAUUUCGGAAGAACAGCCA	1	32.4181	4	0.951794	Output/R24h/cleaveLand_result/t_plot/PC-3p-1060_9765_XM_016086384.2_399_TPlot.pdf	0	0	NA	NA	NA	32.4181	0	Inf	up	1.2429e-08	1.41251e-08	yes	GO:0071704(organic substance metabolic process);GO:0009987(cellular process);GO:0009310(amine catabolic process);GO:0019439(aromatic compound catabolic process);GO:0042430(indole-containing compound metabolic process);GO:0016811(hydrolase activity, acting on carbon-nitrogen (but not peptide) bonds, in linear amides);GO:0016787(hydrolase activity);GO:0009074(aromatic amino acid family catabolic pr…	NA
PC-3p-1060_9765	XM_016096293.2	943	968	954	-37	-24.6	0.664865	13	2-7,967-962;8-17,956-947;19-21,945-943	1-1,968-968[UP5];x-x,961-957[BULt];18-18,946-946[SIL]	(((.((((((((((.....((((((.&.))))))-----)))))))))).)))	UGGGUGUUCUUCCGCGGCAAAAUGGA&CCUAUUU-----CGGAAGAACAGCCA	1	32.4181	4	0.973472	Output/R24h/cleaveLand_result/t_plot/PC-3p-1060_9765_XM_016096293.2_954_TPlot.pdf	0	0	NA	NA	NA	32.4181	0	Inf	up	1.2429e-08	1.41251e-08	yes	GO:0031224(intrinsic component of membrane);GO:0016021(integral component of membrane);GO:0044425(membrane part);GO:0016020(membrane)	NA
PC-3p-1060_9765	XM_016101782.2	488	511	501	-37	-25.78	0.696757	7	1-9,511-503;10-13,501-498;16-21,493-488	x-x,502-502[BULt];14-15,497-494[AILt]	((((((....((((.(((((((((&)))))))))-))))--..))))))	UGGCUGGCGGCUUCUUGAAAUAGG&CCUAUUUCG-GAAG--AACAGCCA	2	64.8361	3	0.0780633	Output/R24h/cleaveLand_result/t_plot/PC-3p-1060_9765_XM_016101782.2_501_TPlot.pdf	2	79.2048	3	0.0548494	Output/R0h/cleaveLand_result/t_plot/PC-3p-1060_9765_XM_016101782.2_501_TPlot.pdf	64.8361	79.2048	-0.28879	down	0.2312	0.241796	yes	NA	NA
PC-3p-1060_9765	XM_016102697.2	455	475	466	-37	-25.3	0.683784	7	3-19,473-457	1-2,475-474[UP5];20-21,456-455[UP3]	..(((((((((((((((((..&..)))))))))))))))))..	AUGCUGUUCUUCUGAAAUGUU&CCUAUUUCGGAAGAACAGCCA	0	0	NA	NA	NA	3	118.807	2	0.30688	Output/R0h/cleaveLand_result/t_plot/PC-3p-1060_9765_XM_016102697.2_466_TPlot.pdf	0	118.807	-Inf	down	1.1501e-27	2.02633e-26	yes	NA	ko00511(Other glycan degradation)
PC-3p-1060_9765	XM_016102850.2	1199	1221	1212	-37	-24.9	0.672973	5.5	2-17,1220-1205;18-20,1202-1200	1-1,1221-1221[UP5];x-x,1204-1203[BULt];21-21,1199-1199[UP3]	.(((..((((((((((((((((.&.))))))))))))))))--))).	AGGCCCUGUUUUUCUGAAAUAGA&CCUAUUUCGGAAGAACA--GCCA	1	32.4181	4	0.921908	Output/R24h/cleaveLand_result/t_plot/PC-3p-1060_9765_XM_016102850.2_1212_TPlot.pdf	1	39.6024	4	0.870158	Output/R0h/cleaveLand_result/t_plot/PC-3p-1060_9765_XM_016102850.2_1212_TPlot.pdf	32.4181	39.6024	-0.28879	down	0.39723	0.398704	yes	GO:0006807(nitrogen compound metabolic process);GO:0030554(adenyl nucleotide binding);GO:0008152(metabolic process);GO:0016773(phosphotransferase activity, alcohol group as acceptor);GO:0043167(ion binding);GO:0071704(organic substance metabolic process);GO:0032559(adenyl ribonucleotide binding);GO:1901564(organonitrogen compound metabolic process);GO:0044260(cellular macromolecule metabolic proc…	ko03008(Ribosome biogenesis in eukaryotes)
PC-3p-1060_9765	XM_016107234.2	196	219	206	-37	-24.18	0.653514	13	1-8,219-212;10-14,206-202;16-21,201-196	9-9,211-207[AILt];15-15,x-x[BULq]	((((((-(((((.....((((((((&))))))))----.))))).))))))	UGGCUG-UCUUCAUGGGGAGAUGGG&CCUAUUUC----GGAAGAACAGCCA	0	0	NA	NA	NA	1	39.6024	4	0.982185	Output/R0h/cleaveLand_result/t_plot/PC-3p-1060_9765_XM_016107234.2_206_TPlot.pdf	0	39.6024	-Inf	down	3.1118e-10	6.0515e-10	yes	NA	ko04626(Plant-pathogen interaction)
PC-3p-1060_9765	XM_016109283.2	1202	1225	1215	-37	-25.1	0.678378	10	1-3,1225-1223;5-16,1220-1209;18-20,1205-1203	4-4,1222-1221[AILt];17-17,1208-1206[AILt];21-21,1202-1202[UP3]	.(((...((((((((((((..(((&)))-.))))))))))))--.))).	CGGCGACGUUCUUCCGGAGAGAGG&CCU-AUUUCGGAAGAAC--AGCCA	2	64.8361	2	0.458287	Output/R24h/cleaveLand_result/t_plot/PC-3p-1060_9765_XM_016109283.2_1215_TPlot.pdf	0	0	NA	NA	NA	64.8361	0	Inf	up	8.1306e-16	3.55976e-15	yes	NA	ko03015(mRNA surveillance pathway)
PC-3p-1060_9765	XM_016109435.2	238	264	255	-37	-24.44	0.660541	20	1-3,264-262;5-10,260-255;13-21,246-238	4-4,261-261[SIL];11-12,254-247[AILt]	(((((((((........((((((.(((&))).))))))------..)))))))))	UGGCUGUUCAUGUCCCGCCGAAGGGGG&CCUAUUUCGG------AAGAACAGCCA	1	32.4181	4	0.978916	Output/R24h/cleaveLand_result/t_plot/PC-3p-1060_9765_XM_016109435.2_255_TPlot.pdf	0	0	NA	NA	NA	32.4181	0	Inf	up	1.2429e-08	1.41251e-08	yes	NA	NA
PC-3p-1060_9765	XM_021139545.1	475	495	486	-37	-25.3	0.683784	7	3-19,493-477	1-2,495-494[UP5];20-21,476-475[UP3]	..(((((((((((((((((..&..)))))))))))))))))..	AUGCUGUUCUUCUGAAAUGUU&CCUAUUUCGGAAGAACAGCCA	0	0	NA	NA	NA	1	39.6024	4	0.680264	Output/R0h/cleaveLand_result/t_plot/PC-3p-1060_9765_XM_021139545.1_486_TPlot.pdf	0	39.6024	-Inf	down	3.1118e-10	6.0515e-10	yes	NA	ko00511(Other glycan degradation)
PC-3p-1060_9765	XM_021139724.1	821	843	834	-37	-24.9	0.672973	5.5	2-17,842-827;18-20,824-822	1-1,843-843[UP5];x-x,826-825[BULt];21-21,821-821[UP3]	.(((..((((((((((((((((.&.))))))))))))))))--))).	AGGCCCUGUUUUUCUGAAAUAGA&CCUAUUUCGGAAGAACA--GCCA	0	0	NA	NA	NA	1	39.6024	4	0.867747	Output/R0h/cleaveLand_result/t_plot/PC-3p-1060_9765_XM_021139724.1_834_TPlot.pdf	0	39.6024	-Inf	down	3.1118e-10	6.0515e-10	yes	GO:0006807(nitrogen compound metabolic process);GO:0030554(adenyl nucleotide binding);GO:0008152(metabolic process);GO:0016773(phosphotransferase activity, alcohol group as acceptor);GO:0043167(ion binding);GO:0071704(organic substance metabolic process);GO:0032559(adenyl ribonucleotide binding);GO:1901564(organonitrogen compound metabolic process);GO:0044260(cellular macromolecule metabolic proc…	ko03008(Ribosome biogenesis in eukaryotes)
PC-3p-1060_9765	XM_021142435.1	239	265	256	-37	-24.44	0.660541	20	1-3,265-263;5-10,261-256;13-21,247-239	4-4,262-262[SIL];11-12,255-248[AILt]	(((((((((........((((((.(((&))).))))))------..)))))))))	UGGCUGUUCAUGUCCCGCCGAAGGGGG&CCUAUUUCGG------AAGAACAGCCA	1	32.4181	4	0.979395	Output/R24h/cleaveLand_result/t_plot/PC-3p-1060_9765_XM_021142435.1_256_TPlot.pdf	0	0	NA	NA	NA	32.4181	0	Inf	up	1.2429e-08	1.41251e-08	yes	NA	NA
PC-3p-107728_73	XM_016082672.2	616	637	630	-47.1	-30.8	0.653928	12.5	4-7,634-631;10-23,630-617	1-3,637-635[UP5];8-9,x-x[BULq];24-24,616-616[UP3]	.((((((((((((((--((((...&...))))..)))))))))))))).	GUCGGGUGCAGCGGC--CGUGGUU&UCACAUGAAGUCGCUGCACCUGAG	0	0	NA	NA	NA	1	39.6024	4	0.805403	Output/R0h/cleaveLand_result/t_plot/PC-3p-107728_73_XM_016082672.2_630_TPlot.pdf	0	39.6024	-Inf	down	3.1118e-10	6.0515e-10	yes	GO:0016829(lyase activity);GO:0016836(hydro-lyase activity);GO:0008152(metabolic process);GO:0016835(carbon-oxygen lyase activity);GO:0003824(catalytic activity)	ko01110(Biosynthesis of secondary metabolites);ko01210(2-Oxocarboxylic acid metabolism);ko01100(Metabolic pathways);ko01230(Biosynthesis of amino acids);ko00660(C5-Branched dibasic acid metabolism);ko00290(Valine, leucine and isoleucine biosynthesis)
PC-3p-107728_73	XM_016096585.2	695	719	710	-47.1	-34.9	0.740977	5.5	1-11,719-709;13-24,706-695	12-12,708-707[AILt]	((((((((((((..(((((((((((&)))))))))))-.))))))))))))	UUUAGGUGCAGUUAACUUCAUGUGA&UCACAUGAAGU-CGCUGCACCUGAG	1	32.4181	4	0.36836	Output/R24h/cleaveLand_result/t_plot/PC-3p-107728_73_XM_016096585.2_710_TPlot.pdf	0	0	NA	NA	NA	32.4181	0	Inf	up	1.2429e-08	1.41251e-08	yes	NA	NA
PC-3p-108384_72	BGI_novel_T001417	1747	1772	1761	-45.2	-31.04	0.686726	13.5	2-6,1771-1767;11-24,1760-1747	1-1,1772-1772[UP5];7-10,1766-1761[AILt]	((((((((((((((......(((((.&.)))))--....))))))))))))))	GAACUCAGGUGCAGAACAUCCCAUGG&ACAUGG--UCGACUGCACCUGAGUUU	1	32.4181	4	0.644322	Output/R24h/cleaveLand_result/t_plot/PC-3p-108384_72_BGI_novel_T001417_1761_TPlot.pdf	0	0	NA	NA	NA	32.4181	0	Inf	up	1.2429e-08	1.41251e-08	yes	GO:0051252(regulation of RNA metabolic process);GO:0080090(regulation of primary metabolic process);GO:0040029(regulation of gene expression, epigenetic);GO:0036094(small molecule binding);GO:0010556(regulation of macromolecule biosynthetic process);GO:0008094(DNA-dependent ATPase activity);GO:0043167(ion binding);GO:0005634(nucleus);GO:0016043(cellular component organization);GO:0050789(regulati…	NA
PC-3p-108384_72	BGI_novel_T005413	329	353	344	-45.2	-32.1	0.710177	8.5	2-3,352-351;5-11,349-343;13-20,341-334;21-23,332-330	1-1,353-353[UP5];4-4,350-350[SIL];12-12,342-342[SIL];x-x,333-333[BULt];24-24,329-329[UP3]	.(((.((((((((.(((((((.((.&.)).))))))).))))))))-))).	UGACUUCAGGUGCUGUCGGCCUUGG&ACAUGGUCGACUGCACCUGA-GUUU	1	32.4181	4	0.449686	Output/R24h/cleaveLand_result/t_plot/PC-3p-108384_72_BGI_novel_T005413_344_TPlot.pdf	0	0	NA	NA	NA	32.4181	0	Inf	up	1.2429e-08	1.41251e-08	yes	GO:0006807(nitrogen compound metabolic process);GO:1901566(organonitrogen compound biosynthetic process);GO:1901265(nucleoside phosphate binding);GO:0019202(amino acid kinase activity);GO:0016310(phosphorylation);GO:0006560(proline metabolic process);GO:1901564(organonitrogen compound metabolic process);GO:0005623(cell);GO:0016903(oxidoreductase activity, acting on the aldehyde or oxo group of do…	ko01230(Biosynthesis of amino acids);ko01100(Metabolic pathways);ko00330(Arginine and proline metabolism);ko01110(Biosynthesis of secondary metabolites)
PC-3p-108384_72	XM_021132349.1	618	641	633	-45.2	-33.7	0.745575	9	2-9,640-633;11-20,632-623;21-22,621-620	1-1,641-641[UP5];10-10,x-x[BULq];x-x,622-622[BULt];23-24,619-618[UP3]	..((.((((((((((-((((((((.&.)))))))).))))))))))-))..	GCGCGUCGGGUGCAG-CGGCCGUGG&ACAUGGUCGACUGCACCUGA-GUUU	1	32.4181	4	0.338663	Output/R24h/cleaveLand_result/t_plot/PC-3p-108384_72_XM_021132349.1_633_TPlot.pdf	0	0	NA	NA	NA	32.4181	0	Inf	up	1.2429e-08	1.41251e-08	yes	GO:0016829(lyase activity);GO:0016836(hydro-lyase activity);GO:0008152(metabolic process);GO:0016835(carbon-oxygen lyase activity);GO:0003824(catalytic activity)	ko01110(Biosynthesis of secondary metabolites);ko01210(2-Oxocarboxylic acid metabolism);ko01100(Metabolic pathways);ko01230(Biosynthesis of amino acids);ko00660(C5-Branched dibasic acid metabolism);ko00290(Valine, leucine and isoleucine biosynthesis)
PC-3p-110122_70	BGI_novel_T001367	1556	1582	1573	-32.1	-24.8	0.772586	13.5	2-10,1581-1573;11-22,1567-1556	1-1,1582-1582[UP5];x-x,1572-1568[BULt]	((((((((((((.....(((((((((.&.)))))))))-----))))))))))))	AGGCAAAGUUGAGGGCUCAAGGAUCCC&AGGAUUCUUG-----UUAACUUUGCUU	0	0	NA	NA	NA	1	39.6024	4	0.554793	Output/R0h/cleaveLand_result/t_plot/PC-3p-110122_70_BGI_novel_T001367_1573_TPlot.pdf	0	39.6024	-Inf	down	3.1118e-10	6.0515e-10	yes	NA	ko03015(mRNA surveillance pathway)
PC-3p-110122_70	BGI_novel_T003031	1596	1621	1612	-32.1	-21.16	0.65919	13.5	2-12,1620-1610;15-22,1603-1596	1-1,1621-1621[UP5];13-14,1609-1604[AILt]	((((((((......(((((((((((.&.)))))))))))----..))))))))	AAGCAGAGAGGGUGAGCAAGAAUUCA&AGGAUUCUUGUU----AACUUUGCUU	1	32.4181	4	1	Output/R24h/cleaveLand_result/t_plot/PC-3p-110122_70_BGI_novel_T003031_1612_TPlot.pdf	0	0	NA	NA	NA	32.4181	0	Inf	up	1.2429e-08	1.41251e-08	yes	NA	ko03013(RNA transport)
PC-3p-110122_70	BGI_novel_T003099	1232	1263	1253	-32.1	-21.4	0.666667	23.5	1-7,1263-1257;8-12,1255-1251;13-22,1241-1232	x-x,1256-1256[BULt];x-x,1250-1242[BULt]	((((((((((.........(((((.(((((((&)))))))-)))))---------))))))))))	GAGCAAAGUUCCAAUGCGAGACGGCGAAUCCU&AGGAUUC-UUGUU---------AACUUUGCUU	1	32.4181	4	1	Output/R24h/cleaveLand_result/t_plot/PC-3p-110122_70_BGI_novel_T003099_1253_TPlot.pdf	0	0	NA	NA	NA	32.4181	0	Inf	up	1.2429e-08	1.41251e-08	yes	GO:0032501(multicellular organismal process);GO:0044260(cellular macromolecule metabolic process);GO:0006796(phosphate-containing compound metabolic process);GO:0043412(macromolecule modification);GO:0044425(membrane part);GO:0006793(phosphorus metabolic process);GO:0003824(catalytic activity);GO:0044267(cellular protein metabolic process);GO:0005886(plasma membrane);GO:1901363(heterocyclic compo…	NA
PC-3p-110122_70	BGI_novel_T004138	2156	2179	2170	-32.1	-21.1	0.657321	9.5	2-14,2178-2166;15-17,2164-2162;19-21,2159-2157	1-1,2179-2179[UP5];x-x,2165-2165[BULt];18-18,2161-2160[AILt];22-22,2156-2156[UP3]	.(((..(((.(((((((((((((.&.)))))))))))))-)))-.))).	UAGCUUAGGUUUGGCAGGAGUCCC&AGGAUUCUUGUUAA-CUU-UGCUU	0	0	NA	NA	NA	1	39.6024	4	1	Output/R0h/cleaveLand_result/t_plot/PC-3p-110122_70_BGI_novel_T004138_2170_TPlot.pdf	0	39.6024	-Inf	down	3.1118e-10	6.0515e-10	yes	GO:0051179(localization);GO:0008324(cation transmembrane transporter activity);GO:0005623(cell);GO:0006811(ion transport);GO:0015672(monovalent inorganic cation transport);GO:0015293(symporter activity);GO:0005355(glucose transmembrane transporter activity);GO:0044459(plasma membrane part);GO:0071944(cell periphery);GO:0071702(organic substance transport);GO:0015075(ion transmembrane transporter …	ko00190(Oxidative phosphorylation);ko00500(Starch and sucrose metabolism);ko01100(Metabolic pathways)
PC-3p-110122_70	BGI_novel_T007328	4048	4069	4060	-32.1	-21.6	0.672897	8.5	1-4,4069-4066;6-19,4064-4051	5-5,4065-4065[SIL];20-22,4050-4048[UP3]	...((((((((((((((.((((&)))).))))))))))))))...	GAACAGAGUUGAUGAGACUCCU&AGGAUUCUUGUUAACUUUGCUU	1	32.4181	4	1	Output/R24h/cleaveLand_result/t_plot/PC-3p-110122_70_BGI_novel_T007328_4060_TPlot.pdf	0	0	NA	NA	NA	32.4181	0	Inf	up	1.2429e-08	1.41251e-08	yes	GO:0044424(intracellular part);GO:0005634(nucleus);GO:0005623(cell);GO:0005488(binding);GO:0003682(chromatin binding);GO:0043231(intracellular membrane-bounded organelle);GO:0043229(intracellular organelle);GO:0043227(membrane-bounded organelle);GO:0043226(organelle);GO:0044464(cell part);GO:0005622(intracellular)	NA
PC-3p-110122_70	BGI_novel_T012165	1163	1183	1174	-32.1	-20.9	0.65109	9	1-9,1183-1175;11-16,1173-1168;19-20,1166-1165	10-10,1174-1174[SIL];17-18,1167-1167[AILq];21-22,1164-1163[UP3]	..((.-((((((.(((((((((&))))))))).))))))..))..	ACGUU-GGUUGAGGAGAAUCCU&AGGAUUCUUGUUAACUUUGCUU	1	32.4181	4	1	Output/R24h/cleaveLand_result/t_plot/PC-3p-110122_70_BGI_novel_T012165_1174_TPlot.pdf	0	0	NA	NA	NA	32.4181	0	Inf	up	1.2429e-08	1.41251e-08	yes	GO:0008152(metabolic process);GO:0046483(heterocycle metabolic process);GO:0006807(nitrogen compound metabolic process);GO:0006725(cellular aromatic compound metabolic process);GO:0009987(cellular process);GO:0043170(macromolecule metabolic process);GO:0006139(nucleobase-containing compound metabolic process);GO:1901360(organic cyclic compound metabolic process);GO:0090304(nucleic acid metabolic …	NA
PC-3p-110122_70	BGI_novel_T012512	1587	1609	1600	-32.1	-23.2	0.722741	4.5	1-14,1609-1596;15-22,1594-1587	x-x,1595-1595[BULt]	((((((((.((((((((((((((&))))))))))))))-))))))))	AAGCAAGGAUUAACAAGGAUUUU&AGGAUUCUUGUUAA-CUUUGCUU	0	0	NA	NA	NA	3	118.807	2	0.663296	Output/R0h/cleaveLand_result/t_plot/PC-3p-110122_70_BGI_novel_T012512_1600_TPlot.pdf	0	118.807	-Inf	down	1.1501e-27	2.02633e-26	yes	GO:0006518(peptide metabolic process);GO:0016875(ligase activity, forming carbon-oxygen bonds);GO:0043043(peptide biosynthetic process);GO:0036094(small molecule binding);GO:0044249(cellular biosynthetic process);GO:0043168(anion binding);GO:0009058(biosynthetic process);GO:0043038(amino acid activation);GO:0044281(small molecule metabolic process);GO:1901576(organic substance biosynthetic proces…	ko00970(Aminoacyl-tRNA biosynthesis)
PC-3p-110122_70	BGI_novel_T013110	325	346	337	-32.1	-23.48	0.731464	8	2-11,345-336;15-21,332-326	1-1,346-346[UP5];12-14,335-333[SIL];22-22,325-325[UP3]	.(((((((...((((((((((.&.))))))))))...))))))).	CAGCAAAGCUUGCGAGAAUCCC&AGGAUUCUUGUUAACUUUGCUU	0	0	NA	NA	NA	1	39.6024	4	0.951904	Output/R0h/cleaveLand_result/t_plot/PC-3p-110122_70_BGI_novel_T013110_337_TPlot.pdf	0	39.6024	-Inf	down	3.1118e-10	6.0515e-10	yes	GO:0006605(protein targeting);GO:0015031(protein transport);GO:0044464(cell part);GO:0005488(binding);GO:0006613(cotranslational protein targeting to membrane);GO:0051649(establishment of localization in cell);GO:0071705(nitrogen compound transport);GO:0072594(establishment of protein localization to organelle);GO:0006810(transport);GO:0005622(intracellular);GO:0006612(protein targeting to membra…	ko03060(Protein export)
PC-3p-110122_70	XM_016076143.2	699	721	711	-32.1	-21.7	0.676012	11.5	2-4,720-718;6-20,715-701	1-1,721-721[UP5];5-5,717-716[AILt];21-22,700-699[UP3]	..(((((((((((((((..(((.&.)))-.)))))))))))))))..	AUGCAGAGUUGACAGGGCUUUCG&AGGA-UUCUUGUUAACUUUGCUU	0	0	NA	NA	NA	1	39.6024	4	0.999994	Output/R0h/cleaveLand_result/t_plot/PC-3p-110122_70_XM_016076143.2_711_TPlot.pdf	0	39.6024	-Inf	down	3.1118e-10	6.0515e-10	yes	GO:0016787(hydrolase activity);GO:0003824(catalytic activity)	NA
PC-3p-110122_70	XM_016078063.2	41	62	53	-32.1	-21.4	0.666667	7.5	2-8,61-55;10-12,53-51;15-22,48-41	1-1,62-62[UP5];9-9,54-54[SIL];13-14,50-49[SIL]	((((((((..(((.(((((((.&.))))))).)))..))))))))	GAGCAAAGCGAAUUGGAAUCCC&AGGAUUCUUGUUAACUUUGCUU	1	32.4181	4	1	Output/R24h/cleaveLand_result/t_plot/PC-3p-110122_70_XM_016078063.2_53_TPlot.pdf	0	0	NA	NA	NA	32.4181	0	Inf	up	1.2429e-08	1.41251e-08	yes	GO:0022618(ribonucleoprotein complex assembly);GO:0005622(intracellular);GO:0016070(RNA metabolic process);GO:0044422(organelle part);GO:0005634(nucleus);GO:0071826(ribonucleoprotein complex subunit organization);GO:0005687(U4 snRNP);GO:0034622(cellular macromolecular complex assembly);GO:0005686(U2 snRNP);GO:0034641(cellular nitrogen compound metabolic process);GO:0005682(U5 snRNP);GO:0044464(ce…	ko03040(Spliceosome)
PC-3p-110122_70	XM_016078791.2	835	858	849	-32.1	-22.4	0.697819	8	2-10,857-849;11-12,846-845;15-22,842-835	1-1,858-858[UP5];x-x,848-847[BULt];13-14,844-843[SIL]	((((((((..((..(((((((((.&.)))))))))--))..))))))))	AAGCAAAGGCAAACCAGGAAUCCA&AGGAUUCUUG--UUAACUUUGCUU	1	32.4181	4	0.999831	Output/R24h/cleaveLand_result/t_plot/PC-3p-110122_70_XM_016078791.2_849_TPlot.pdf	0	0	NA	NA	NA	32.4181	0	Inf	up	1.2429e-08	1.41251e-08	yes	GO:0016746(transferase activity, transferring acyl groups);GO:0016740(transferase activity);GO:0003824(catalytic activity);GO:0016747(transferase activity, transferring acyl groups other than amino-acyl groups)	NA
PC-3p-110122_70	XM_016079227.2	1805	1825	1817	-32.1	-21.2	0.660436	10	2-3,1824-1823;5-9,1822-1818;11-22,1816-1805	1-1,1825-1825[UP5];4-4,x-x[BULq];10-10,1817-1817[SIL]	((((((((((((.(((((-((.&.)).))))).))))))))))))	AGGCAAGGUUGAGGAGAG-CUG&AGGAUUCUUGUUAACUUUGCUU	1	32.4181	4	1	Output/R24h/cleaveLand_result/t_plot/PC-3p-110122_70_XM_016079227.2_1817_TPlot.pdf	2	79.2048	3	0.739197	Output/R0h/cleaveLand_result/t_plot/PC-3p-110122_70_XM_016079227.2_1817_TPlot.pdf	32.4181	79.2048	-1.28879	down	9.4884e-06	1.04237e-05	yes	GO:0005623(cell);GO:0065007(biological regulation);GO:0050789(regulation of biological process);GO:0009987(cellular process);GO:0065008(regulation of biological quality);GO:0050794(regulation of cellular process);GO:0042592(homeostatic process);GO:0019725(cellular homeostasis);GO:0045454(cell redox homeostasis)	NA
PC-3p-110122_70	XM_016079967.2	1016	1037	1028	-32.1	-22.3	0.694704	9.5	3-9,1035-1029;11-21,1027-1017	1-2,1037-1036[UP5];10-10,1028-1028[SIL];22-22,1016-1016[UP3]	.(((((((((((.(((((((..&..))))))).))))))))))).	CAGUAGGGUUAGGGAGAAUCGC&AGGAUUCUUGUUAACUUUGCUU	10	324.181	2	0.952279	Output/R24h/cleaveLand_result/t_plot/PC-3p-110122_70_XM_016079967.2_1028_TPlot.pdf	1	39.6024	4	0.999385	Output/R0h/cleaveLand_result/t_plot/PC-3p-110122_70_XM_016079967.2_1028_TPlot.pdf	324.181	39.6024	3.03314	up	2.3792e-50	1.57732e-48	yes	GO:0008270(zinc ion binding);GO:0019538(protein metabolic process);GO:0032446(protein modification by small protein conjugation);GO:0046872(metal ion binding);GO:0061659(ubiquitin-like protein ligase activity);GO:1901564(organonitrogen compound metabolic process);GO:0043632(modification-dependent macromolecule catabolic process);GO:0044257(cellular protein catabolic process);GO:0042787(protein ub…	NA
PC-3p-110122_70	XM_016080200.2	370	390	382	-32.1	-21.3	0.663551	9	2-3,389-388;5-11,387-381;13-21,379-371	1-1,390-390[UP5];4-4,x-x[BULq];12-12,380-380[SIL];22-22,370-370[UP3]	.(((((((((.(((((((-((.&.)).))))))).))))))))).	UGGCAAGGUUUACAAGGG-CCA&AGGAUUCUUGUUAACUUUGCUU	0	0	NA	NA	NA	1	39.6024	4	1	Output/R0h/cleaveLand_result/t_plot/PC-3p-110122_70_XM_016080200.2_382_TPlot.pdf	0	39.6024	-Inf	down	3.1118e-10	6.0515e-10	yes	GO:0006468(protein phosphorylation);GO:0032553(ribonucleotide binding);GO:0009987(cellular process);GO:0097159(organic cyclic compound binding);GO:0043167(ion binding);GO:0019538(protein metabolic process);GO:0018193(peptidyl-amino acid modification);GO:0043168(anion binding);GO:0000166(nucleotide binding);GO:0032555(purine ribonucleotide binding);GO:0016772(transferase activity, transferring pho…	NA
PC-3p-110122_70	XM_016080239.2	1999	2020	2011	-32.1	-21.6	0.672897	9.5	3-22,2018-1999	1-2,2020-2019[UP5]	((((((((((((((((((((..&..))))))))))))))))))))	AGGUGGGGUUAGCAAGGGUUGC&AGGAUUCUUGUUAACUUUGCUU	2	64.8361	2	0.994563	Output/R24h/cleaveLand_result/t_plot/PC-3p-110122_70_XM_016080239.2_2011_TPlot.pdf	1	39.6024	4	0.999997	Output/R0h/cleaveLand_result/t_plot/PC-3p-110122_70_XM_016080239.2_2011_TPlot.pdf	64.8361	39.6024	0.71121	up	0.01354	0.0144021	yes	GO:0044464(cell part);GO:0043227(membrane-bounded organelle);GO:0043229(intracellular organelle);GO:0044424(intracellular part);GO:0005545(1-phosphatidylinositol binding);GO:0005543(phospholipid binding);GO:0043168(anion binding);GO:0043623(cellular protein complex assembly);GO:0097708(intracellular vesicle);GO:0070271(protein complex biogenesis);GO:0016043(cellular component organization);GO:006…	NA
PC-3p-110122_70	XM_016081021.2	548	569	561	-32.1	-20.9	0.65109	9	2-5,568-565;7-12,564-559;13-21,557-549	1-1,569-569[UP5];6-6,x-x[BULq];x-x,558-558[BULt];22-22,548-548[UP3]	.(((((((((.((((((-((((.&.)))).))))))-))))))))).	UGGUAAAGUUGGACGAG-AUCCA&AGGAUUCUUGUU-AACUUUGCUU	0	0	NA	NA	NA	2	79.2048	2	0.998908	Output/R0h/cleaveLand_result/t_plot/PC-3p-110122_70_XM_016081021.2_561_TPlot.pdf	0	79.2048	-Inf	down	5.5905e-19	3.88279e-18	yes	NA	NA
PC-3p-110122_70	XM_016081466.2	234	254	245	-32.1	-22.4	0.697819	8	2-13,253-242;15-21,241-235	1-1,254-254[UP5];14-14,x-x[BULq];22-22,234-234[UP3]	.(((((((-((((((((((((.&.)))))))))))).))))))).	UGGCAGAG-UGAUAGGAAUCUC&AGGAUUCUUGUUAACUUUGCUU	3	97.2542	3	0.528496	Output/R24h/cleaveLand_result/t_plot/PC-3p-110122_70_XM_016081466.2_245_TPlot.pdf	1	39.6024	4	0.998892	Output/R0h/cleaveLand_result/t_plot/PC-3p-110122_70_XM_016081466.2_245_TPlot.pdf	97.2542	39.6024	1.29617	up	8.2959e-07	9.29693e-07	yes	GO:0004659(prenyltransferase activity);GO:0043227(membrane-bounded organelle);GO:0009507(chloroplast);GO:0005737(cytoplasm);GO:0043229(intracellular organelle);GO:0003824(catalytic activity);GO:0005623(cell);GO:0044424(intracellular part);GO:0044444(cytoplasmic part);GO:0016765(transferase activity, transferring alkyl or aryl (other than methyl) groups);GO:0009536(plastid);GO:0005622(intracellula…	ko01110(Biosynthesis of secondary metabolites);ko00130(Ubiquinone and other terpenoid-quinone biosynthesis);ko01100(Metabolic pathways)
PC-3p-110122_70	XM_016081532.2	1302	1325	1316	-32.1	-21.6	0.672897	8	2-10,1324-1316;11-19,1313-1305	1-1,1325-1325[UP5];x-x,1315-1314[BULt];20-22,1304-1302[UP3]	...(((((((((..(((((((((.&.)))))))))--)))))))))...	UAACAAAGUUAAGUCAAGAAUCCG&AGGAUUCUUG--UUAACUUUGCUU	0	0	NA	NA	NA	1	39.6024	4	0.999998	Output/R0h/cleaveLand_result/t_plot/PC-3p-110122_70_XM_016081532.2_1316_TPlot.pdf	0	39.6024	-Inf	down	3.1118e-10	6.0515e-10	yes	GO:0016772(transferase activity, transferring phosphorus-containing groups);GO:0050789(regulation of biological process);GO:0005488(binding);GO:0031326(regulation of cellular biosynthetic process);GO:2000112(regulation of cellular macromolecule biosynthetic process);GO:0010468(regulation of gene expression);GO:0005524(ATP binding);GO:0036211(protein modification process);GO:0044260(cellular macro…	ko04075(Plant hormone signal transduction);ko04016(MAPK signaling pathway - plant)
PC-3p-110122_70	XM_016082316.2	2024	2043	2034	-32.1	-21.4	0.666667	7.5	2-16,2042-2028;19-21,2027-2025	1-1,2043-2043[UP5];17-18,x-x[BULq];22-22,2024-2024[UP3]	.(((--(((((((((((((((.&.)))))))))))))))..))).	UAGU--AGUUAACGGGGAUCCA&AGGAUUCUUGUUAACUUUGCUU	0	0	NA	NA	NA	1	39.6024	4	1	Output/R0h/cleaveLand_result/t_plot/PC-3p-110122_70_XM_016082316.2_2034_TPlot.pdf	0	39.6024	-Inf	down	3.1118e-10	6.0515e-10	yes	NA	ko03013(RNA transport)
PC-3p-110122_70	XM_016082486.2	1327	1347	1339	-32.1	-22.8	0.71028	10.5	2-8,1346-1340;11-21,1338-1328	1-1,1347-1347[UP5];9-10,1339-1339[AILq];22-22,1327-1327[UP3]	.(((((((((((.-(((((((.&.)))))))..))))))))))).	UGGCGAGGUUGAG-GGAGUCCC&AGGAUUCUUGUUAACUUUGCUU	1	32.4181	4	0.99788	Output/R24h/cleaveLand_result/t_plot/PC-3p-110122_70_XM_016082486.2_1339_TPlot.pdf	0	0	NA	NA	NA	32.4181	0	Inf	up	1.2429e-08	1.41251e-08	yes	GO:0003677(DNA binding);GO:0009987(cellular process);GO:0051301(cell division);GO:0097159(organic cyclic compound binding);GO:0003676(nucleic acid binding);GO:1901363(heterocyclic compound binding);GO:0005488(binding)	ko03040(Spliceosome)
PC-3p-110122_70	XM_016082670.2	500	523	512	-32.1	-25.9	0.806854	6.5	1-3,523-521;4-21,518-501	x-x,520-519[BULt];22-22,500-500[UP3]	.((((((((((((((((((..(((&)))--)))))))))))))))))).	UGGCGAGGUUAACAAGAAUGACCU&AGG--AUUCUUGUUAACUUUGCUU	3	97.2542	2	0.209123	Output/R24h/cleaveLand_result/t_plot/PC-3p-110122_70_XM_016082670.2_512_TPlot.pdf	0	0	NA	NA	NA	97.2542	0	Inf	up	6.0829e-23	7.372e-22	yes	GO:0003824(catalytic activity);GO:0015399(primary active transmembrane transporter activity);GO:0005773(vacuole);GO:0016817(hydrolase activity, acting on acid anhydrides);GO:0031090(organelle membrane);GO:0005623(cell);GO:0098805(whole membrane);GO:0043227(membrane-bounded organelle);GO:0016462(pyrophosphatase activity);GO:0005794(Golgi apparatus);GO:0016020(membrane);GO:0043492(ATPase activity, …	ko00190(Oxidative phosphorylation);ko04145(Phagosome);ko01100(Metabolic pathways)
PC-3p-110122_70	XM_016083344.2	875	897	888	-32.1	-21.6	0.672897	7	2-5,896-893;7-15,891-883;16-21,881-876	1-1,897-897[UP5];6-6,892-892[SIL];x-x,882-882[BULt];22-22,875-875[UP3]	.((((((.(((((((((.((((.&.)))).)))))))))-)))))).	CAGUAGAUGUUGACAAGUAUCCA&AGGAUUCUUGUUAAC-UUUGCUU	0	0	NA	NA	NA	2	79.2048	2	0.981353	Output/R0h/cleaveLand_result/t_plot/PC-3p-110122_70_XM_016083344.2_888_TPlot.pdf	0	79.2048	-Inf	down	5.5905e-19	3.88279e-18	yes	GO:0044464(cell part);GO:0044260(cellular macromolecule metabolic process);GO:0009059(macromolecule biosynthetic process);GO:0005737(cytoplasm);GO:0008152(metabolic process);GO:0043038(amino acid activation);GO:0044238(primary metabolic process);GO:0043043(peptide biosynthetic process);GO:0043039(tRNA aminoacylation);GO:0016874(ligase activity);GO:1901564(organonitrogen compound metabolic process…	ko00970(Aminoacyl-tRNA biosynthesis)
PC-3p-110122_70	XM_016084270.2	318	339	330	-32.1	-26.5	0.825545	6	2-4,338-336;7-22,333-318	1-1,339-339[UP5];5-6,335-334[SIL]	((((((((((((((((..(((.&.)))..))))))))))))))))	GAGCAAGGUUAACAAGCCUCCA&AGGAUUCUUGUUAACUUUGCUU	1	32.4181	4	0.396723	Output/R24h/cleaveLand_result/t_plot/PC-3p-110122_70_XM_016084270.2_330_TPlot.pdf	2	79.2048	3	0.0305497	Output/R0h/cleaveLand_result/t_plot/PC-3p-110122_70_XM_016084270.2_330_TPlot.pdf	32.4181	79.2048	-1.28879	down	9.4884e-06	1.04237e-05	yes	GO:0003735(structural constituent of ribosome);GO:0043228(non-membrane-bounded organelle);GO:0071704(organic substance metabolic process);GO:0006518(peptide metabolic process);GO:0043232(intracellular non-membrane-bounded organelle);GO:0043043(peptide biosynthetic process);GO:0022625(cytosolic large ribosomal subunit);GO:0022626(cytosolic ribosome);GO:0044237(cellular metabolic process);GO:000519…	ko03010(Ribosome)
PC-3p-110122_70	XM_016085529.1	57	78	69	-32.1	-22.58	0.703427	9	1-11,78-68;15-22,64-57	12-14,67-65[SIL]	((((((((...(((((((((((&)))))))))))...))))))))	GAGCAGAGCCCGCAGGAGUCUU&AGGAUUCUUGUUAACUUUGCUU	1	32.4181	4	0.999373	Output/R24h/cleaveLand_result/t_plot/PC-3p-110122_70_XM_016085529.1_69_TPlot.pdf	0	0	NA	NA	NA	32.4181	0	Inf	up	1.2429e-08	1.41251e-08	yes	GO:0031326(regulation of cellular biosynthetic process);GO:0043231(intracellular membrane-bounded organelle);GO:0051252(regulation of RNA metabolic process);GO:0005488(binding);GO:0044424(intracellular part);GO:0043565(sequence-specific DNA binding);GO:0051171(regulation of nitrogen compound metabolic process);GO:1903506(regulation of nucleic acid-templated transcription);GO:0050794(regulation of…	NA
PC-3p-110122_70	XM_016085670.2	391	413	404	-32.1	-21.8	0.679128	7	2-3,412-411;5-13,409-401;14-20,399-393	1-1,413-413[UP5];4-4,410-410[SIL];x-x,400-400[BULt];21-22,392-391[UP3]	..(((((((.(((((((((.((.&.)).)))))))))-)))))))..	UCGCGAGGUAUAACAAGAAACCA&AGGAUUCUUGUUA-ACUUUGCUU	0	0	NA	NA	NA	1	39.6024	4	0.999983	Output/R0h/cleaveLand_result/t_plot/PC-3p-110122_70_XM_016085670.2_404_TPlot.pdf	0	39.6024	-Inf	down	3.1118e-10	6.0515e-10	yes	GO:0043227(membrane-bounded organelle);GO:0003676(nucleic acid binding);GO:0000786(nucleosome);GO:1901363(heterocyclic compound binding);GO:0044815(DNA packaging complex);GO:0046983(protein dimerization activity);GO:0097159(organic cyclic compound binding);GO:0043231(intracellular membrane-bounded organelle);GO:0044424(intracellular part);GO:0043228(non-membrane-bounded organelle);GO:0032991(macr…	NA
PC-3p-110122_70	XM_016086542.2	1576	1598	1589	-32.1	-23.2	0.722741	4.5	1-14,1598-1585;15-22,1583-1576	x-x,1584-1584[BULt]	((((((((.((((((((((((((&))))))))))))))-))))))))	AAGCAAGGAUUAACAAGGAUUUU&AGGAUUCUUGUUAA-CUUUGCUU	0	0	NA	NA	NA	3	118.807	2	0.693631	Output/R0h/cleaveLand_result/t_plot/PC-3p-110122_70_XM_016086542.2_1589_TPlot.pdf	0	118.807	-Inf	down	1.1501e-27	2.02633e-26	yes	GO:0006518(peptide metabolic process);GO:0016875(ligase activity, forming carbon-oxygen bonds);GO:0043043(peptide biosynthetic process);GO:0036094(small molecule binding);GO:0044249(cellular biosynthetic process);GO:0043168(anion binding);GO:0009058(biosynthetic process);GO:0043038(amino acid activation);GO:0044281(small molecule metabolic process);GO:1901576(organic substance biosynthetic proces…	ko00970(Aminoacyl-tRNA biosynthesis)
PC-3p-110122_70	XM_016086828.2	251	270	262	-32.1	-22.5	0.700935	6	2-8,269-263;10-17,262-255;19-22,254-251	1-1,270-270[UP5];9-9,x-x[BULq];18-18,x-x[BULq]	((((-((((((((-(((((((.&.))))))).)))))))).))))	GAGC-GAGUUAAC-GGAAUCCG&AGGAUUCUUGUUAACUUUGCUU	0	0	NA	NA	NA	3	118.807	2	0.851172	Output/R0h/cleaveLand_result/t_plot/PC-3p-110122_70_XM_016086828.2_262_TPlot.pdf	0	118.807	-Inf	down	1.1501e-27	2.02633e-26	yes	GO:0009813(flavonoid biosynthetic process);GO:0009058(biosynthetic process);GO:0009812(flavonoid metabolic process);GO:0016872(intramolecular lyase activity);GO:0003824(catalytic activity);GO:0045430(chalcone isomerase activity);GO:1901576(organic substance biosynthetic process);GO:0016853(isomerase activity);GO:0008152(metabolic process);GO:0071704(organic substance metabolic process)	ko01100(Metabolic pathways);ko01110(Biosynthesis of secondary metabolites);ko00941(Flavonoid biosynthesis)
PC-3p-110122_70	XM_016087198.2	1609	1630	1620	-32.1	-20.9	0.65109	6.5	1-8,1630-1623;9-17,1621-1613;19-20,1612-1611	x-x,1622-1622[BULt];18-18,x-x[BULq];21-22,1610-1609[UP3]	..((-(((((((((.((((((((&))))))))-))))))))).))..	UUGC-AGGUUAAUACAGAAUCCU&AGGAUUCU-UGUUAACUUUGCUU	1	32.4181	4	1	Output/R24h/cleaveLand_result/t_plot/PC-3p-110122_70_XM_016087198.2_1620_TPlot.pdf	0	0	NA	NA	NA	32.4181	0	Inf	up	1.2429e-08	1.41251e-08	yes	GO:0043167(ion binding);GO:0003676(nucleic acid binding);GO:0046872(metal ion binding);GO:0005488(binding);GO:0097159(organic cyclic compound binding);GO:0043169(cation binding);GO:1901363(heterocyclic compound binding)	NA
PC-3p-110122_70	XM_016087838.2	1542	1565	1553	-32.1	-20.9	0.65109	9	1-5,1565-1561;6-18,1557-1545;20-22,1544-1542	x-x,1560-1558[BULt];19-19,x-x[BULq]	(((-(((((((((((((...(((((&)))))---))))))))))))).)))	GAG-AAGGUUAACAGGAAAUAUCCU&AGGAU---UCUUGUUAACUUUGCUU	6	194.508	2	0.99993	Output/R24h/cleaveLand_result/t_plot/PC-3p-110122_70_XM_016087838.2_1553_TPlot.pdf	0	0	NA	NA	NA	194.508	0	Inf	up	3.2672e-44	1.69138e-42	yes	GO:0030880(RNA polymerase complex);GO:0005622(intracellular);GO:1901564(organonitrogen compound metabolic process);GO:0043234(protein complex);GO:0044451(nucleoplasm part);GO:2001141(regulation of RNA biosynthetic process);GO:0008152(metabolic process);GO:0009891(positive regulation of biosynthetic process);GO:0006357(regulation of transcription from RNA polymerase II promoter);GO:0008023(transcr…	NA
PC-3p-110122_70	XM_016087939.2	547	566	559	-32.1	-21.6	0.672897	9.5	2-8,565-559;11-20,558-549	1-1,566-566[UP5];9-10,x-x[BULq];21-22,548-547[UP3]	..((((((((((--(((((((.&.)))))))..))))))))))..	CCGCAAGGUUGA--AGAGUCCG&AGGAUUCUUGUUAACUUUGCUU	0	0	NA	NA	NA	2	79.2048	2	0.976715	Output/R0h/cleaveLand_result/t_plot/PC-3p-110122_70_XM_016087939.2_559_TPlot.pdf	0	79.2048	-Inf	down	5.5905e-19	3.88279e-18	yes	GO:0006807(nitrogen compound metabolic process);GO:0010467(gene expression);GO:0003723(RNA binding);GO:0043043(peptide biosynthetic process);GO:0003676(nucleic acid binding);GO:0065007(biological regulation);GO:1901564(organonitrogen compound metabolic process);GO:0044249(cellular biosynthetic process);GO:0043227(membrane-bounded organelle);GO:0009987(cellular process);GO:0044238(primary metaboli…	NA
PC-3p-110122_70	XM_016089517.2	567	588	579	-32.1	-21.9	0.682243	6.5	1-3,588-586;5-12,584-577;15-21,574-568	4-4,585-585[SIL];13-14,576-575[SIL];22-22,567-567[UP3]	.(((((((..((((((((.(((&))).))))))))..))))))).	UGGCAAAGAGAACGAGAACCCU&AGGAUUCUUGUUAACUUUGCUU	4	129.672	2	0.984895	Output/R24h/cleaveLand_result/t_plot/PC-3p-110122_70_XM_016089517.2_579_TPlot.pdf	0	0	NA	NA	NA	129.672	0	Inf	up	4.813e-30	1.15989e-28	yes	GO:0044282(small molecule catabolic process);GO:0009987(cellular process);GO:0071704(organic substance metabolic process);GO:0016790(thiolester hydrolase activity);GO:0006081(cellular aldehyde metabolic process);GO:0016787(hydrolase activity);GO:0006089(lactate metabolic process);GO:1901575(organic substance catabolic process);GO:0008152(metabolic process);GO:0042180(cellular ketone metabolic pro…	ko00620(Pyruvate metabolism)
PC-3p-110122_70	XM_016091670.2	969	990	981	-32.1	-27.6	0.859813	4	1-2,990-989;4-22,987-969	3-3,988-988[SIL]	(((((((((((((((((((.((&)).)))))))))))))))))))	GAGUAAAGUUGACAAGAAUGCU&AGGAUUCUUGUUAACUUUGCUU	0	0	NA	NA	NA	1	39.6024	4	0.136819	Output/R0h/cleaveLand_result/t_plot/PC-3p-110122_70_XM_016091670.2_981_TPlot.pdf	0	39.6024	-Inf	down	3.1118e-10	6.0515e-10	yes	NA	ko03440(Homologous recombination)
PC-3p-110122_70	XM_016095903.2	675	698	687	-32.1	-21.2	0.660436	12.5	2-5,697-694;6-19,691-678	1-1,698-698[UP5];x-x,693-692[BULt];20-22,677-675[UP3]	...((((((((((((((..((((.&.))))--))))))))))))))...	CCUCAGAGUUGACGGGAAGGUCCG&AGGAU--UCUUGUUAACUUUGCUU	3	97.2542	2	0.99939	Output/R24h/cleaveLand_result/t_plot/PC-3p-110122_70_XM_016095903.2_687_TPlot.pdf	1	39.6024	4	1	Output/R0h/cleaveLand_result/t_plot/PC-3p-110122_70_XM_016095903.2_687_TPlot.pdf	97.2542	39.6024	1.29617	up	8.2959e-07	9.29693e-07	yes	GO:0031226(intrinsic component of plasma membrane);GO:0050789(regulation of biological process);GO:0005886(plasma membrane);GO:0007165(signal transduction);GO:0044464(cell part);GO:0006952(defense response);GO:0030054(cell junction);GO:0046658(anchored component of plasma membrane);GO:0050896(response to stimulus);GO:0005911(cell-cell junction);GO:0065007(biological regulation);GO:0016020(membran…	NA
PC-3p-110122_70	XM_016097900.2	1247	1271	1262	-32.1	-22.4	0.697819	5.5	2-13,1270-1259;14-16,1257-1255;17-21,1252-1248	1-1,1271-1271[UP5];x-x,1258-1258[BULt];x-x,1254-1253[BULt];22-22,1247-1247[UP3]	.(((((..(((.((((((((((((.&.))))))))))))-)))--))))).	CAGCGAUCAGUGUAACAAGAAUCCC&AGGAUUCUUGUUA-ACU--UUGCUU	1	32.4181	4	0.999806	Output/R24h/cleaveLand_result/t_plot/PC-3p-110122_70_XM_016097900.2_1262_TPlot.pdf	0	0	NA	NA	NA	32.4181	0	Inf	up	1.2429e-08	1.41251e-08	yes	NA	NA
PC-3p-110122_70	XM_016097901.2	1216	1240	1231	-32.1	-22.4	0.697819	5.5	2-13,1239-1228;14-16,1226-1224;17-21,1221-1217	1-1,1240-1240[UP5];x-x,1227-1227[BULt];x-x,1223-1222[BULt];22-22,1216-1216[UP3]	.(((((..(((.((((((((((((.&.))))))))))))-)))--))))).	CAGCGAUCAGUGUAACAAGAAUCCC&AGGAUUCUUGUUA-ACU--UUGCUU	2	64.8361	2	0.948137	Output/R24h/cleaveLand_result/t_plot/PC-3p-110122_70_XM_016097901.2_1231_TPlot.pdf	0	0	NA	NA	NA	64.8361	0	Inf	up	8.1306e-16	3.55976e-15	yes	NA	NA
PC-3p-110122_70	XM_016099306.2	1864	1885	1876	-32.1	-27.6	0.859813	4	1-2,1885-1884;4-22,1882-1864	3-3,1883-1883[SIL]	(((((((((((((((((((.((&)).)))))))))))))))))))	GAGUAAAGUUGACAAGAAUGCU&AGGAUUCUUGUUAACUUUGCUU	2	64.8361	1	0.00223066	Output/R24h/cleaveLand_result/t_plot/PC-3p-110122_70_XM_016099306.2_1876_TPlot.pdf	0	0	NA	NA	NA	64.8361	0	Inf	up	8.1306e-16	3.55976e-15	yes	GO:0003677(DNA binding);GO:0043232(intracellular non-membrane-bounded organelle);GO:0005524(ATP binding);GO:0097159(organic cyclic compound binding);GO:0004003(ATP-dependent DNA helicase activity);GO:0043140(ATP-dependent 3'-5' DNA helicase activity);GO:0006139(nucleobase-containing compound metabolic process);GO:0035639(purine ribonucleoside triphosphate binding);GO:0043170(macromolecule metabol…	ko03440(Homologous recombination)
PC-3p-110122_70	XM_016101943.2	325	345	337	-32.1	-22.1	0.688474	7	2-5,344-341;7-12,340-335;15-21,332-326	1-1,345-345[UP5];6-6,x-x[BULq];13-14,334-333[SIL];22-22,325-325[UP3]	.(((((((..((((((-((((.&.)))).))))))..))))))).	CGGCAAGGGCAACAAG-AUCCG&AGGAUUCUUGUUAACUUUGCUU	5	162.09	2	0.969234	Output/R24h/cleaveLand_result/t_plot/PC-3p-110122_70_XM_016101943.2_337_TPlot.pdf	4	158.41	2	0.922289	Output/R0h/cleaveLand_result/t_plot/PC-3p-110122_70_XM_016101943.2_337_TPlot.pdf	162.09	158.41	0.0331384	up	0.83709	0.837639	yes	GO:0016020(membrane);GO:0044425(membrane part);GO:0016021(integral component of membrane);GO:0031224(intrinsic component of membrane)	ko00190(Oxidative phosphorylation);ko01100(Metabolic pathways)
PC-3p-110122_70	XM_016103212.2	100	124	115	-32.1	-21.8	0.679128	8.5	2-3,123-122;5-15,120-110;16-22,106-100	1-1,124-124[UP5];4-4,121-121[SIL];x-x,109-107[BULt]	(((((((...(((((((((((.((.&.)).)))))))))))---)))))))	GAGCGAGCCCGUUAGCAAGAAGCCG&AGGAUUCUUGUUAAC---UUUGCUU	1	32.4181	4	0.999998	Output/R24h/cleaveLand_result/t_plot/PC-3p-110122_70_XM_016103212.2_115_TPlot.pdf	1	39.6024	4	0.999978	Output/R0h/cleaveLand_result/t_plot/PC-3p-110122_70_XM_016103212.2_115_TPlot.pdf	32.4181	39.6024	-0.28879	down	0.39723	0.398704	yes	GO:0031224(intrinsic component of membrane);GO:0016020(membrane);GO:0044425(membrane part);GO:0016021(integral component of membrane)	NA
PC-3p-110122_70	XM_016103562.2	841	861	852	-32.1	-22.1	0.688474	7.5	1-7,861-855;10-12,852-850;15-22,848-841	8-9,854-853[SIL];13-14,849-849[AILq]	((((((((.-(((..(((((((&)))))))..)))..))))))))	AAGCAAGGG-AACUUGAGUCCU&AGGAUUCUUGUUAACUUUGCUU	0	0	NA	NA	NA	2	79.2048	2	0.927702	Output/R0h/cleaveLand_result/t_plot/PC-3p-110122_70_XM_016103562.2_852_TPlot.pdf	0	79.2048	-Inf	down	5.5905e-19	3.88279e-18	yes	GO:0031325(positive regulation of cellular metabolic process);GO:0019222(regulation of metabolic process);GO:0009057(macromolecule catabolic process);GO:0045899(positive regulation of RNA polymerase II transcriptional preinitiation complex assembly);GO:0060255(regulation of macromolecule metabolic process);GO:1903362(regulation of cellular protein catabolic process);GO:0003824(catalytic activity)…	ko04141(Protein processing in endoplasmic reticulum)
PC-3p-110122_70	XM_016103986.2	654	675	666	-32.1	-21.2	0.660436	7	1-2,675-674;4-19,672-657	3-3,673-673[SIL];20-22,656-654[UP3]	...((((((((((((((((.((&)).))))))))))))))))...	UUCCAAAGUUAGCAAGAAUGUU&AGGAUUCUUGUUAACUUUGCUU	0	0	NA	NA	NA	1	39.6024	4	1	Output/R0h/cleaveLand_result/t_plot/PC-3p-110122_70_XM_016103986.2_666_TPlot.pdf	0	39.6024	-Inf	down	3.1118e-10	6.0515e-10	yes	NA	NA
PC-3p-110122_70	XM_016105061.2	634	657	646	-32.1	-26	0.809969	6.5	1-3,657-655;4-21,652-635	x-x,654-653[BULt];22-22,634-634[UP3]	.((((((((((((((((((..(((&)))--)))))))))))))))))).	CGGCGAGGUUAACAAGAAUGACCU&AGG--AUUCUUGUUAACUUUGCUU	0	0	NA	NA	NA	2	79.2048	2	0.139252	Output/R0h/cleaveLand_result/t_plot/PC-3p-110122_70_XM_016105061.2_646_TPlot.pdf	0	79.2048	-Inf	down	5.5905e-19	3.88279e-18	yes	GO:0043492(ATPase activity, coupled to movement of substances);GO:0043229(intracellular organelle);GO:0051234(establishment of localization);GO:0017111(nucleoside-triphosphatase activity);GO:0042623(ATPase activity, coupled);GO:0043231(intracellular membrane-bounded organelle);GO:0044422(organelle part);GO:0098805(whole membrane);GO:0044437(vacuolar part);GO:0044464(cell part);GO:0005773(vacuole)…	ko04145(Phagosome);ko01100(Metabolic pathways);ko00190(Oxidative phosphorylation)
PC-3p-110122_70	XM_016105066.2	400	423	412	-32.1	-26	0.809969	6.5	1-3,423-421;4-21,418-401	x-x,420-419[BULt];22-22,400-400[UP3]	.((((((((((((((((((..(((&)))--)))))))))))))))))).	CGGCGAGGUUAACAAGAAUGACCU&AGG--AUUCUUGUUAACUUUGCUU	0	0	NA	NA	NA	1	39.6024	4	0.402473	Output/R0h/cleaveLand_result/t_plot/PC-3p-110122_70_XM_016105066.2_412_TPlot.pdf	0	39.6024	-Inf	down	3.1118e-10	6.0515e-10	yes	GO:0043492(ATPase activity, coupled to movement of substances);GO:0043229(intracellular organelle);GO:0051234(establishment of localization);GO:0017111(nucleoside-triphosphatase activity);GO:0042623(ATPase activity, coupled);GO:0043231(intracellular membrane-bounded organelle);GO:0044422(organelle part);GO:0098805(whole membrane);GO:0044437(vacuolar part);GO:0044464(cell part);GO:0005773(vacuole)…	ko04145(Phagosome);ko01100(Metabolic pathways);ko00190(Oxidative phosphorylation)
PC-3p-110122_70	XM_016105931.2	1386	1407	1398	-32.1	-23.5	0.732087	9	2-2,1406-1406;5-21,1403-1387	1-1,1407-1407[UP5];3-4,1405-1404[SIL];22-22,1386-1386[UP3]	.(((((((((((((((((..(.&.)..))))))))))))))))).	UGGCAAGGUUAACAGGAGCACA&AGGAUUCUUGUUAACUUUGCUU	0	0	NA	NA	NA	1	39.6024	4	0.925218	Output/R0h/cleaveLand_result/t_plot/PC-3p-110122_70_XM_016105931.2_1398_TPlot.pdf	0	39.6024	-Inf	down	3.1118e-10	6.0515e-10	yes	GO:0016021(integral component of membrane);GO:0031224(intrinsic component of membrane);GO:0044425(membrane part);GO:0016020(membrane)	ko03013(RNA transport);ko03008(Ribosome biogenesis in eukaryotes)
PC-3p-110122_70	XM_016105946.2	632	654	644	-32.1	-22.4	0.697819	13.5	2-9,653-646;14-22,640-632	1-1,654-654[UP5];10-13,645-641[AILt]	(((((((((.....((((((((.&.))))))))-....)))))))))	GAGCGAGGUGUUAAGAGAGUCCG&AGGAUUCUU-GUUAACUUUGCUU	0	0	NA	NA	NA	2	79.2048	3	0.414034	Output/R0h/cleaveLand_result/t_plot/PC-3p-110122_70_XM_016105946.2_644_TPlot.pdf	0	79.2048	-Inf	down	5.5905e-19	3.88279e-18	yes	GO:0043167(ion binding);GO:0071704(organic substance metabolic process);GO:0004619(phosphoglycerate mutase activity);GO:0044424(intracellular part);GO:0008152(metabolic process);GO:1901575(organic substance catabolic process);GO:0044282(small molecule catabolic process);GO:0016868(intramolecular transferase activity, phosphotransferases);GO:0046914(transition metal ion binding);GO:0009056(catabol…	ko01230(Biosynthesis of amino acids);ko01110(Biosynthesis of secondary metabolites);ko00260(Glycine, serine and threonine metabolism);ko01200(Carbon metabolism);ko00010(Glycolysis / Gluconeogenesis);ko01100(Metabolic pathways)
PC-3p-110122_70	XM_016105947.2	632	654	644	-32.1	-22.4	0.697819	13.5	2-9,653-646;14-22,640-632	1-1,654-654[UP5];10-13,645-641[AILt]	(((((((((.....((((((((.&.))))))))-....)))))))))	GAGCGAGGUGUUAAGAGAGUCCG&AGGAUUCUU-GUUAACUUUGCUU	0	0	NA	NA	NA	4	158.41	2	0.868289	Output/R0h/cleaveLand_result/t_plot/PC-3p-110122_70_XM_016105947.2_644_TPlot.pdf	0	158.41	-Inf	down	2.5027e-36	8.44623e-35	yes	GO:0043167(ion binding);GO:0071704(organic substance metabolic process);GO:0004619(phosphoglycerate mutase activity);GO:0044424(intracellular part);GO:0008152(metabolic process);GO:1901575(organic substance catabolic process);GO:0044282(small molecule catabolic process);GO:0016868(intramolecular transferase activity, phosphotransferases);GO:0046914(transition metal ion binding);GO:0009056(catabol…	ko01230(Biosynthesis of amino acids);ko01110(Biosynthesis of secondary metabolites);ko00260(Glycine, serine and threonine metabolism);ko01200(Carbon metabolism);ko00010(Glycolysis / Gluconeogenesis);ko01100(Metabolic pathways)
PC-3p-110122_70	XM_016107246.2	648	670	661	-32.1	-22.32	0.695327	9	1-11,670-660;15-22,655-648	12-14,659-656[AILt]	((((((((....(((((((((((&)))))))))))-...))))))))	AGGUAGGGAGAUACAAGAGUCCU&AGGAUUCUUGU-UAACUUUGCUU	1	32.4181	4	0.999895	Output/R24h/cleaveLand_result/t_plot/PC-3p-110122_70_XM_016107246.2_661_TPlot.pdf	0	0	NA	NA	NA	32.4181	0	Inf	up	1.2429e-08	1.41251e-08	yes	GO:1901566(organonitrogen compound biosynthetic process);GO:0016866(intramolecular transferase activity);GO:0044238(primary metabolic process);GO:1901564(organonitrogen compound metabolic process);GO:0006807(nitrogen compound metabolic process);GO:0046394(carboxylic acid biosynthetic process);GO:0043648(dicarboxylic acid metabolic process);GO:0009073(aromatic amino acid family biosynthetic proces…	ko01110(Biosynthesis of secondary metabolites);ko00400(Phenylalanine, tyrosine and tryptophan biosynthesis);ko01230(Biosynthesis of amino acids);ko01100(Metabolic pathways)
PC-3p-110122_70	XM_016107966.2	1031	1051	1042	-32.1	-21	0.654206	8.5	2-12,1050-1040;15-19,1038-1034	1-1,1051-1051[UP5];13-14,1039-1039[AILq];20-22,1033-1031[UP3]	...(((((.-(((((((((((.&.)))))))))))..)))))...	UCACAGAGG-AGCAAGAGUCCA&AGGAUUCUUGUUAACUUUGCUU	2	64.8361	2	0.999859	Output/R24h/cleaveLand_result/t_plot/PC-3p-110122_70_XM_016107966.2_1042_TPlot.pdf	1	39.6024	4	1	Output/R0h/cleaveLand_result/t_plot/PC-3p-110122_70_XM_016107966.2_1042_TPlot.pdf	64.8361	39.6024	0.71121	up	0.01354	0.0144021	yes	GO:0046914(transition metal ion binding);GO:0008152(metabolic process);GO:0043169(cation binding);GO:0046872(metal ion binding);GO:0044425(membrane part);GO:0046906(tetrapyrrole binding);GO:0043167(ion binding);GO:0016705(oxidoreductase activity, acting on paired donors, with incorporation or reduction of molecular oxygen);GO:0004497(monooxygenase activity);GO:0020037(heme binding);GO:0016491(oxi…	ko00906(Carotenoid biosynthesis)
PC-3p-110122_70	XM_016108342.2	2085	2105	2096	-32.1	-21	0.654206	5.5	2-2,2104-2104;4-12,2102-2094;15-22,2092-2085	1-1,2105-2105[UP5];3-3,2103-2103[SIL];13-14,2093-2093[AILq]	((((((((.-(((((((((.(.&.).)))))))))..))))))))	AAGCAGAGA-AACAAGAAUGCA&AGGAUUCUUGUUAACUUUGCUU	1	32.4181	4	1	Output/R24h/cleaveLand_result/t_plot/PC-3p-110122_70_XM_016108342.2_2096_TPlot.pdf	0	0	NA	NA	NA	32.4181	0	Inf	up	1.2429e-08	1.41251e-08	yes	GO:0016021(integral component of membrane);GO:0043492(ATPase activity, coupled to movement of substances);GO:0035639(purine ribonucleoside triphosphate binding);GO:0070838(divalent metal ion transport);GO:0005887(integral component of plasma membrane);GO:0034220(ion transmembrane transport);GO:0022804(active transmembrane transporter activity);GO:0070588(calcium ion transmembrane transport);GO:00…	NA
PC-3p-110122_70	XM_016110193.2	800	821	812	-32.1	-22.48	0.700312	9	2-15,820-807;19-21,803-801	1-1,821-821[UP5];16-18,806-804[SIL];22-22,800-800[UP3]	.(((...((((((((((((((.&.))))))))))))))...))).	UGGUUAUGUUGGCAAGAGUCCA&AGGAUUCUUGUUAACUUUGCUU	1	32.4181	4	0.999744	Output/R24h/cleaveLand_result/t_plot/PC-3p-110122_70_XM_016110193.2_812_TPlot.pdf	0	0	NA	NA	NA	32.4181	0	Inf	up	1.2429e-08	1.41251e-08	yes	GO:0016020(membrane);GO:0031224(intrinsic component of membrane);GO:0044425(membrane part);GO:0016021(integral component of membrane)	NA
PC-3p-110122_70	XM_016111589.2	857	878	870	-32.1	-21.2	0.660436	8.5	1-3,878-876;5-9,875-871;11-14,869-866;15-22,864-857	4-4,x-x[BULq];10-10,870-870[SIL];x-x,865-865[BULt]	((((((((.((((.(((((-(((&))).))))).))))-))))))))	GAGCAAAGUUUGAGGAGGA-CCU&AGGAUUCUUGUUAA-CUUUGCUU	0	0	NA	NA	NA	1	39.6024	4	1	Output/R0h/cleaveLand_result/t_plot/PC-3p-110122_70_XM_016111589.2_870_TPlot.pdf	0	39.6024	-Inf	down	3.1118e-10	6.0515e-10	yes	GO:1901265(nucleoside phosphate binding);GO:0008152(metabolic process);GO:0016491(oxidoreductase activity);GO:0036094(small molecule binding);GO:0005488(binding);GO:0003824(catalytic activity);GO:0097159(organic cyclic compound binding);GO:0048037(cofactor binding);GO:0055114(oxidation-reduction process);GO:0000166(nucleotide binding);GO:0016614(oxidoreductase activity, acting on CH-OH group of d…	ko01200(Carbon metabolism);ko00630(Glyoxylate and dicarboxylate metabolism);ko01100(Metabolic pathways)
PC-3p-110122_70	XM_016112239.1	1752	1774	1764	-32.1	-22.5	0.700935	8	1-8,1774-1767;9-21,1765-1753	x-x,1766-1766[BULt];22-22,1752-1752[UP3]	.(((((((((((((.((((((((&))))))))-))))))))))))).	CAGUGAAGUUGACAGGGGAUCUU&AGGAUUCU-UGUUAACUUUGCUU	0	0	NA	NA	NA	1	39.6024	4	0.998339	Output/R0h/cleaveLand_result/t_plot/PC-3p-110122_70_XM_016112239.1_1764_TPlot.pdf	0	39.6024	-Inf	down	3.1118e-10	6.0515e-10	yes	GO:0042651(thylakoid membrane);GO:0016020(membrane);GO:0042221(response to chemical);GO:0044436(thylakoid part);GO:0006950(response to stress);GO:0000304(response to singlet oxygen);GO:0005623(cell);GO:0009579(thylakoid);GO:1901700(response to oxygen-containing compound);GO:0044464(cell part);GO:0050896(response to stimulus);GO:0044424(intracellular part);GO:0000302(response to reactive oxygen sp…	ko03018(RNA degradation)
PC-3p-110122_70	XM_016113208.2	307	328	319	-32.1	-26.4	0.82243	6	2-4,327-325;7-22,322-307	1-1,328-328[UP5];5-6,324-323[SIL]	((((((((((((((((..(((.&.)))..))))))))))))))))	GAGCAAGGUUAACAAGCCUCCG&AGGAUUCUUGUUAACUUUGCUU	1	32.4181	4	0.410423	Output/R24h/cleaveLand_result/t_plot/PC-3p-110122_70_XM_016113208.2_319_TPlot.pdf	2	79.2048	3	0.0319159	Output/R0h/cleaveLand_result/t_plot/PC-3p-110122_70_XM_016113208.2_319_TPlot.pdf	32.4181	79.2048	-1.28879	down	9.4884e-06	1.04237e-05	yes	GO:0009058(biosynthetic process);GO:0009987(cellular process);GO:0006518(peptide metabolic process);GO:0043603(cellular amide metabolic process);GO:0010467(gene expression);GO:1901564(organonitrogen compound metabolic process);GO:0043228(non-membrane-bounded organelle);GO:0030529(intracellular ribonucleoprotein complex);GO:0044237(cellular metabolic process);GO:0032991(macromolecular complex);GO:…	ko03010(Ribosome)
PC-3p-110122_70	XM_016114359.2	1087	1111	1100	-32.1	-21.2	0.660436	10.5	1-8,1111-1104;9-12,1101-1098;14-22,1095-1087	x-x,1103-1102[BULt];13-13,1097-1096[AILt]	(((((((((..((((..((((((((&))))))))--))))-.)))))))))	AAGCAGAGUGAAGCAGCAGAGUCUU&AGGAUUCU--UGUU-AACUUUGCUU	1	32.4181	4	1	Output/R24h/cleaveLand_result/t_plot/PC-3p-110122_70_XM_016114359.2_1100_TPlot.pdf	0	0	NA	NA	NA	32.4181	0	Inf	up	1.2429e-08	1.41251e-08	yes	GO:0016020(membrane)	NA
PC-3p-110122_70	XM_016114360.2	1084	1108	1097	-32.1	-21.2	0.660436	10.5	1-8,1108-1101;9-12,1098-1095;14-22,1092-1084	x-x,1100-1099[BULt];13-13,1094-1093[AILt]	(((((((((..((((..((((((((&))))))))--))))-.)))))))))	AAGCAGAGUGAAGCAGCAGAGUCUU&AGGAUUCU--UGUU-AACUUUGCUU	1	32.4181	4	1	Output/R24h/cleaveLand_result/t_plot/PC-3p-110122_70_XM_016114360.2_1097_TPlot.pdf	0	0	NA	NA	NA	32.4181	0	Inf	up	1.2429e-08	1.41251e-08	yes	GO:0016020(membrane)	NA
PC-3p-110122_70	XM_016114512.2	420	439	430	-32.1	-21.3	0.663551	7.5	2-9,438-431;11-12,429-428;15-22,427-420	1-1,439-439[UP5];10-10,430-430[SIL];13-14,x-x[BULq]	((((((((--((.((((((((.&.)))))))).))..))))))))	GAGCGAGG--GAGAAGAAUCCG&AGGAUUCUUGUUAACUUUGCUU	0	0	NA	NA	NA	1	39.6024	4	1	Output/R0h/cleaveLand_result/t_plot/PC-3p-110122_70_XM_016114512.2_430_TPlot.pdf	0	39.6024	-Inf	down	3.1118e-10	6.0515e-10	yes	GO:0071704(organic substance metabolic process);GO:0036094(small molecule binding);GO:0006464(cellular protein modification process);GO:1901363(heterocyclic compound binding);GO:0016740(transferase activity);GO:0016301(kinase activity);GO:0035639(purine ribonucleoside triphosphate binding);GO:0043170(macromolecule metabolic process);GO:0036211(protein modification process);GO:0016310(phosphorylat…	NA
PC-3p-110122_70	XM_016115839.2	883	903	894	-32.1	-21.7	0.676012	9	2-9,902-895;11-12,893-892;15-22,890-883	1-1,903-903[UP5];10-10,894-894[SIL];13-14,891-891[AILq]	((((((((.-((.((((((((.&.)))))))).))..))))))))	AGGCGAAGG-AAGGGGAGUCCG&AGGAUUCUUGUUAACUUUGCUU	0	0	NA	NA	NA	1	39.6024	4	0.999994	Output/R0h/cleaveLand_result/t_plot/PC-3p-110122_70_XM_016115839.2_894_TPlot.pdf	0	39.6024	-Inf	down	3.1118e-10	6.0515e-10	yes	NA	NA
PC-3p-110122_70	XM_016117788.2	452	474	465	-32.1	-23.9	0.744548	9	2-4,473-471;6-19,469-456;20-22,454-452	1-1,474-474[UP5];5-5,470-470[SIL];x-x,455-455[BULt]	(((.((((((((((((((.(((.&.))).))))))))))))))-)))	GAGACAGAGUUGGCGAGGCUCCA&AGGAUUCUUGUUAACUUUG-CUU	1	32.4181	4	0.881918	Output/R24h/cleaveLand_result/t_plot/PC-3p-110122_70_XM_016117788.2_465_TPlot.pdf	0	0	NA	NA	NA	32.4181	0	Inf	up	1.2429e-08	1.41251e-08	yes	GO:0016020(membrane)	NA
PC-3p-110122_70	XM_021128342.1	378	398	389	-32.1	-23.2	0.722741	6.5	1-3,398-396;5-13,394-386;15-22,385-378	4-4,395-395[SIL];14-14,x-x[BULq]	((((((((-(((((((((.(((&))).))))))))).))))))))	AAGCAAGG-UGGCGAGAAGCCU&AGGAUUCUUGUUAACUUUGCUU	0	0	NA	NA	NA	1	39.6024	4	0.982509	Output/R0h/cleaveLand_result/t_plot/PC-3p-110122_70_XM_021128342.1_389_TPlot.pdf	0	39.6024	-Inf	down	3.1118e-10	6.0515e-10	yes	NA	ko03013(RNA transport)
PC-3p-110122_70	XM_021131353.1	1241	1263	1254	-32.1	-23.2	0.722741	4.5	1-14,1263-1250;15-22,1248-1241	x-x,1249-1249[BULt]	((((((((.((((((((((((((&))))))))))))))-))))))))	AAGCAAGGAUUAACAAGGAUUUU&AGGAUUCUUGUUAA-CUUUGCUU	0	0	NA	NA	NA	2	79.2048	2	0.674331	Output/R0h/cleaveLand_result/t_plot/PC-3p-110122_70_XM_021131353.1_1254_TPlot.pdf	0	79.2048	-Inf	down	5.5905e-19	3.88279e-18	yes	GO:0006518(peptide metabolic process);GO:0016875(ligase activity, forming carbon-oxygen bonds);GO:0043043(peptide biosynthetic process);GO:0036094(small molecule binding);GO:0044249(cellular biosynthetic process);GO:0043168(anion binding);GO:0009058(biosynthetic process);GO:0043038(amino acid activation);GO:0044281(small molecule metabolic process);GO:1901576(organic substance biosynthetic proces…	ko00970(Aminoacyl-tRNA biosynthesis)
PC-3p-110122_70	XM_021132330.1	2337	2357	2349	-32.1	-21.1	0.657321	9.5	2-6,2356-2352;10-22,2349-2337	1-1,2357-2357[UP5];7-9,2351-2350[AILq]	(((((((((((((..-(((((.&.)))))...)))))))))))))	AAGCGAAGUUGGCCA-AAUCCA&AGGAUUCUUGUUAACUUUGCUU	1	32.4181	4	1	Output/R24h/cleaveLand_result/t_plot/PC-3p-110122_70_XM_021132330.1_2349_TPlot.pdf	0	0	NA	NA	NA	32.4181	0	Inf	up	1.2429e-08	1.41251e-08	yes	NA	NA
PC-3p-110122_70	XM_021133349.1	678	702	693	-32.1	-23.6	0.735202	8	1-18,702-685;19-22,681-678	x-x,684-682[BULt]	((((...((((((((((((((((((&))))))))))))))))))---))))	AAGUGAUGAAGUUGAUGAGGAUCCU&AGGAUUCUUGUUAACUUU---GCUU	1	32.4181	4	0.928764	Output/R24h/cleaveLand_result/t_plot/PC-3p-110122_70_XM_021133349.1_693_TPlot.pdf	0	0	NA	NA	NA	32.4181	0	Inf	up	1.2429e-08	1.41251e-08	yes	GO:0031326(regulation of cellular biosynthetic process);GO:0009058(biosynthetic process);GO:1901360(organic cyclic compound metabolic process);GO:0080090(regulation of primary metabolic process);GO:0005634(nucleus);GO:0046483(heterocycle metabolic process);GO:0060255(regulation of macromolecule metabolic process);GO:0044260(cellular macromolecule metabolic process);GO:0044464(cell part);GO:200114…	ko00051(Fructose and mannose metabolism);ko00230(Purine metabolism);ko01110(Biosynthesis of secondary metabolites);ko01100(Metabolic pathways);ko00500(Starch and sucrose metabolism)
PC-3p-110122_70	XM_021134278.1	2346	2367	2358	-32.1	-22.3	0.694704	10	2-8,2366-2360;10-11,2358-2357;14-21,2354-2347	1-1,2367-2367[UP5];9-9,2359-2359[SIL];12-13,2356-2355[SIL];22-22,2346-2346[UP3]	.((((((((..((.(((((((.&.))))))).))..)))))))).	CAGCAGGGUGUGCCGGAAUCCA&AGGAUUCUUGUUAACUUUGCUU	1	32.4181	4	0.999905	Output/R24h/cleaveLand_result/t_plot/PC-3p-110122_70_XM_021134278.1_2358_TPlot.pdf	0	0	NA	NA	NA	32.4181	0	Inf	up	1.2429e-08	1.41251e-08	yes	GO:0032555(purine ribonucleotide binding);GO:0003824(catalytic activity);GO:0006811(ion transport);GO:0004012(phospholipid-translocating ATPase activity);GO:0031224(intrinsic component of membrane);GO:0006820(anion transport);GO:0006810(transport);GO:0016020(membrane);GO:0000287(magnesium ion binding);GO:0071702(organic substance transport);GO:0009987(cellular process);GO:0006869(lipid transport)…	NA
PC-3p-110122_70	XM_021139282.1	851	872	864	-32.1	-21.4	0.666667	5.5	2-8,871-865;10-18,864-856;19-22,854-851	1-1,872-872[UP5];9-9,x-x[BULq];x-x,855-855[BULt]	((((.(((((((((-(((((((.&.))))))).)))))))))-))))	AAGCUGAAGUUAAC-AGAAUCUC&AGGAUUCUUGUUAACUUU-GCUU	0	0	NA	NA	NA	4	158.41	2	0.98824	Output/R0h/cleaveLand_result/t_plot/PC-3p-110122_70_XM_021139282.1_864_TPlot.pdf	0	158.41	-Inf	down	2.5027e-36	8.44623e-35	yes	GO:0005515(protein binding);GO:0008092(cytoskeletal protein binding);GO:0071840(cellular component organization or biogenesis);GO:0009987(cellular process);GO:0015631(tubulin binding);GO:0008017(microtubule binding);GO:0005488(binding);GO:0016043(cellular component organization);GO:0007010(cytoskeleton organization);GO:0006996(organelle organization)	ko03013(RNA transport)
PC-3p-110122_70	XM_021141082.1	821	843	833	-32.1	-22.3	0.694704	9.5	2-2,842-842;5-22,838-821	1-1,843-843[UP5];3-4,841-839[AILt]	((((((((((((((((((...(.&.)-..))))))))))))))))))	GAGUGAAGUUGACAAGAAGCACA&AG-GAUUCUUGUUAACUUUGCUU	1	32.4181	4	0.999922	Output/R24h/cleaveLand_result/t_plot/PC-3p-110122_70_XM_021141082.1_833_TPlot.pdf	0	0	NA	NA	NA	32.4181	0	Inf	up	1.2429e-08	1.41251e-08	yes	GO:0043933(macromolecular complex subunit organization);GO:0044464(cell part);GO:0006461(protein complex assembly);GO:0022607(cellular component assembly);GO:0009987(cellular process);GO:0005829(cytosol);GO:0071840(cellular component organization or biogenesis);GO:0044424(intracellular part);GO:0005622(intracellular);GO:0044085(cellular component biogenesis);GO:0034622(cellular macromolecular com…	NA
PC-3p-110122_70	XM_021141085.1	821	843	833	-32.1	-22.3	0.694704	9.5	2-2,842-842;5-22,838-821	1-1,843-843[UP5];3-4,841-839[AILt]	((((((((((((((((((...(.&.)-..))))))))))))))))))	GAGUGAAGUUGACAAGAAGCACA&AG-GAUUCUUGUUAACUUUGCUU	0	0	NA	NA	NA	1	39.6024	4	0.999407	Output/R0h/cleaveLand_result/t_plot/PC-3p-110122_70_XM_021141085.1_833_TPlot.pdf	0	39.6024	-Inf	down	3.1118e-10	6.0515e-10	yes	GO:0043933(macromolecular complex subunit organization);GO:0044464(cell part);GO:0006461(protein complex assembly);GO:0022607(cellular component assembly);GO:0009987(cellular process);GO:0005829(cytosol);GO:0071840(cellular component organization or biogenesis);GO:0044424(intracellular part);GO:0005622(intracellular);GO:0044085(cellular component biogenesis);GO:0034622(cellular macromolecular com…	NA
PC-3p-110122_70	XM_021141158.1	809	831	821	-32.1	-23.3	0.725857	9	2-4,830-828;6-22,825-809	1-1,831-831[UP5];5-5,827-826[AILt]	(((((((((((((((((..(((.&.)))-.)))))))))))))))))	AAGCGAGGUUAGCAAGGUUUUCA&AGGA-UUCUUGUUAACUUUGCUU	1	32.4181	4	0.98757	Output/R24h/cleaveLand_result/t_plot/PC-3p-110122_70_XM_021141158.1_821_TPlot.pdf	0	0	NA	NA	NA	32.4181	0	Inf	up	1.2429e-08	1.41251e-08	yes	GO:0022857(transmembrane transporter activity);GO:0006865(amino acid transport);GO:0044464(cell part);GO:0071702(organic substance transport);GO:0008514(organic anion transmembrane transporter activity);GO:0016021(integral component of membrane);GO:0005623(cell);GO:0006811(ion transport);GO:0015075(ion transmembrane transporter activity);GO:0015849(organic acid transport);GO:0003333(amino acid tr…	NA
PC-3p-110122_70	XM_021143346.1	4314	4335	4326	-32.1	-21.6	0.672897	8.5	1-4,4335-4332;6-19,4330-4317	5-5,4331-4331[SIL];20-22,4316-4314[UP3]	...((((((((((((((.((((&)))).))))))))))))))...	GAACAGAGUUGAUGAGACUCCU&AGGAUUCUUGUUAACUUUGCUU	1	32.4181	4	1	Output/R24h/cleaveLand_result/t_plot/PC-3p-110122_70_XM_021143346.1_4326_TPlot.pdf	0	0	NA	NA	NA	32.4181	0	Inf	up	1.2429e-08	1.41251e-08	yes	GO:0044424(intracellular part);GO:0005634(nucleus);GO:0005623(cell);GO:0005488(binding);GO:0003682(chromatin binding);GO:0043231(intracellular membrane-bounded organelle);GO:0043229(intracellular organelle);GO:0043227(membrane-bounded organelle);GO:0043226(organelle);GO:0044464(cell part);GO:0005622(intracellular)	NA
PC-3p-110421_70	XM_016104157.2	603	624	615	-39	-27.6	0.707692	4.5	1-17,624-608;20-24,607-603	18-19,x-x[BULq]	(((((--(((((((((((((((((&)))))))))))))))))..)))))	GGUCG--AAAUUCAGUCACUUGUG&UACGAGUGACUGAAUUUGAUGACU	3	97.2542	3	0.0260697	Output/R24h/cleaveLand_result/t_plot/PC-3p-110421_70_XM_016104157.2_615_TPlot.pdf	4	158.41	2	0.069655	Output/R0h/cleaveLand_result/t_plot/PC-3p-110421_70_XM_016104157.2_615_TPlot.pdf	97.2542	158.41	-0.703827	down	0.00013079	0.000142645	yes	NA	NA
PC-3p-110421_70	XM_016107410.2	564	587	578	-39	-25.4	0.651282	10.5	4-16,584-572;18-24,570-564	1-3,587-585[UP5];17-17,571-571[SIL]	(((((((.(((((((((((((...&...))))))))))))).)))))))	AGUUAUCUGGUUCGGUUGCUCUCU&UACGAGUGACUGAAUUUGAUGACU	1	32.4181	4	0.770119	Output/R24h/cleaveLand_result/t_plot/PC-3p-110421_70_XM_016107410.2_578_TPlot.pdf	0	0	NA	NA	NA	32.4181	0	Inf	up	1.2429e-08	1.41251e-08	yes	GO:0071556(integral component of lumenal side of endoplasmic reticulum membrane);GO:0006518(peptide metabolic process);GO:0098827(endoplasmic reticulum subcompartment);GO:0097708(intracellular vesicle);GO:0043603(cellular amide metabolic process);GO:0004175(endopeptidase activity);GO:0016787(hydrolase activity);GO:0031984(organelle subcompartment);GO:0098553(lumenal side of endoplasmic reticulum …	NA
PC-3p-110449_70	BGI_novel_T006116	973	996	987	-37.9	-29.2	0.770449	5	1-13,996-984;15-24,982-973	14-14,983-983[SIL]	((((((((((.(((((((((((((&))))))))))))).))))))))))	GGUGUAAUUGUCUUUAUGUGAAGU&AUUUUACAUGAAGUCGAUUGCACC	2	64.8361	2	0.272297	Output/R24h/cleaveLand_result/t_plot/PC-3p-110449_70_BGI_novel_T006116_987_TPlot.pdf	0	0	NA	NA	NA	64.8361	0	Inf	up	8.1306e-16	3.55976e-15	yes	GO:0008152(metabolic process)	NA
PC-3p-110449_70	BGI_novel_T006117	1132	1155	1146	-37.9	-29.2	0.770449	5	1-13,1155-1143;15-24,1141-1132	14-14,1142-1142[SIL]	((((((((((.(((((((((((((&))))))))))))).))))))))))	GGUGUAAUUGUCUUUAUGUGAAGU&AUUUUACAUGAAGUCGAUUGCACC	2	64.8361	2	0.277783	Output/R24h/cleaveLand_result/t_plot/PC-3p-110449_70_BGI_novel_T006117_1146_TPlot.pdf	0	0	NA	NA	NA	64.8361	0	Inf	up	8.1306e-16	3.55976e-15	yes	GO:0008152(metabolic process)	NA
PC-3p-110449_70	XM_016107445.2	368	393	384	-37.9	-25.58	0.674934	12	1-4,393-390;7-15,387-379;18-24,374-368	5-6,389-388[SIL];16-17,378-375[AILt]	(((((((....(((((((((..((((&))))..)))))))))--..)))))))	GGUGCGAGGAGGGCUUCGUGGAGGAU&AUUUUACAUGAAGUC--GAUUGCACC	2	64.8361	3	0.236813	Output/R24h/cleaveLand_result/t_plot/PC-3p-110449_70_XM_016107445.2_384_TPlot.pdf	0	0	NA	NA	NA	64.8361	0	Inf	up	8.1306e-16	3.55976e-15	yes	GO:0005515(protein binding);GO:0005488(binding);GO:0019904(protein domain specific binding)	NA
PC-3p-110481_70	BGI_novel_T003273	2041	2064	2056	-42.3	-28.1	0.664303	7.5	2-8,2063-2057;10-16,2056-2050;17-23,2048-2042	1-1,2064-2064[UP5];9-9,x-x[BULq];x-x,2049-2049[BULt];24-24,2041-2041[UP3]	.(((((((.(((((((-(((((((.&.))))))).)))))))-))))))).	CUUCAGGUAGCAGAUG-UUUUGCGC&ACGUAAAAUCGUCUGC-ACCUGAGU	4	129.672	1	0.0181452	Output/R24h/cleaveLand_result/t_plot/PC-3p-110481_70_BGI_novel_T003273_2056_TPlot.pdf	0	0	NA	NA	NA	129.672	0	Inf	up	4.813e-30	1.15989e-28	yes	GO:0016043(cellular component organization);GO:0032502(developmental process);GO:0048856(anatomical structure development);GO:0048869(cellular developmental process);GO:0009987(cellular process);GO:0009653(anatomical structure morphogenesis);GO:0071840(cellular component organization or biogenesis);GO:0000902(cell morphogenesis);GO:0032989(cellular component morphogenesis)	ko03040(Spliceosome)
PC-3p-110481_70	XM_016076506.2	1467	1491	1482	-42.3	-27.8	0.65721	9	2-4,1490-1488;7-15,1485-1477;16-24,1475-1467	1-1,1491-1491[UP5];5-6,1487-1486[SIL];x-x,1476-1476[BULt]	(((((((((.(((((((((..(((.&.)))..)))))))))-)))))))))	GCUUAGGUGAUGGACGGUUGAACGA&ACGUAAAAUCGUCUG-CACCUGAGU	1	32.4181	4	0.697154	Output/R24h/cleaveLand_result/t_plot/PC-3p-110481_70_XM_016076506.2_1482_TPlot.pdf	0	0	NA	NA	NA	32.4181	0	Inf	up	1.2429e-08	1.41251e-08	yes	GO:0009057(macromolecule catabolic process);GO:0036211(protein modification process);GO:0032553(ribonucleotide binding);GO:0036094(small molecule binding);GO:0005737(cytoplasm);GO:0016740(transferase activity);GO:0008152(metabolic process);GO:0016874(ligase activity);GO:0044424(intracellular part);GO:0044238(primary metabolic process);GO:0030163(protein catabolic process);GO:0043226(organelle);GO…	ko04120(Ubiquitin mediated proteolysis)
PC-3p-110481_70	XM_016098458.2	1723	1746	1738	-42.3	-28.1	0.664303	7.5	2-8,1745-1739;10-16,1738-1732;17-23,1730-1724	1-1,1746-1746[UP5];9-9,x-x[BULq];x-x,1731-1731[BULt];24-24,1723-1723[UP3]	.(((((((.(((((((-(((((((.&.))))))).)))))))-))))))).	CUUCAGGUAGCAGAUG-UUUUGCGC&ACGUAAAAUCGUCUGC-ACCUGAGU	1	32.4181	4	0.618946	Output/R24h/cleaveLand_result/t_plot/PC-3p-110481_70_XM_016098458.2_1738_TPlot.pdf	0	0	NA	NA	NA	32.4181	0	Inf	up	1.2429e-08	1.41251e-08	yes	GO:0016043(cellular component organization);GO:0032502(developmental process);GO:0048856(anatomical structure development);GO:0048869(cellular developmental process);GO:0009987(cellular process);GO:0009653(anatomical structure morphogenesis);GO:0071840(cellular component organization or biogenesis);GO:0000902(cell morphogenesis);GO:0032989(cellular component morphogenesis)	ko03040(Spliceosome)
PC-3p-110481_70	XM_016098459.2	1710	1733	1725	-42.3	-28.1	0.664303	7.5	2-8,1732-1726;10-16,1725-1719;17-23,1717-1711	1-1,1733-1733[UP5];9-9,x-x[BULq];x-x,1718-1718[BULt];24-24,1710-1710[UP3]	.(((((((.(((((((-(((((((.&.))))))).)))))))-))))))).	CUUCAGGUAGCAGAUG-UUUUGCGC&ACGUAAAAUCGUCUGC-ACCUGAGU	1	32.4181	4	0.55247	Output/R24h/cleaveLand_result/t_plot/PC-3p-110481_70_XM_016098459.2_1725_TPlot.pdf	0	0	NA	NA	NA	32.4181	0	Inf	up	1.2429e-08	1.41251e-08	yes	GO:0016043(cellular component organization);GO:0032502(developmental process);GO:0048856(anatomical structure development);GO:0048869(cellular developmental process);GO:0009987(cellular process);GO:0009653(anatomical structure morphogenesis);GO:0071840(cellular component organization or biogenesis);GO:0000902(cell morphogenesis);GO:0032989(cellular component morphogenesis)	ko03040(Spliceosome)
PC-3p-110481_70	XM_016116985.2	1601	1624	1615	-42.3	-27.6	0.652482	17.5	10-24,1615-1601	1-9,1624-1616[UP5]	(((((((((((((((.........&.........)))))))))))))))	AUUCAGGUGCAGACGUUAAAGUAA&ACGUAAAAUCGUCUGCACCUGAGU	3	97.2542	2	0.360149	Output/R24h/cleaveLand_result/t_plot/PC-3p-110481_70_XM_016116985.2_1615_TPlot.pdf	0	0	NA	NA	NA	97.2542	0	Inf	up	6.0829e-23	7.372e-22	yes	GO:0004672(protein kinase activity);GO:0006793(phosphorus metabolic process);GO:1901265(nucleoside phosphate binding);GO:0006468(protein phosphorylation);GO:0018209(peptidyl-serine modification);GO:0005622(intracellular);GO:0051716(cellular response to stimulus);GO:0006796(phosphate-containing compound metabolic process);GO:0005623(cell);GO:0043168(anion binding);GO:0007154(cell communication);GO…	NA
PC-3p-110481_70	XM_021127639.1	1470	1494	1485	-42.3	-27.8	0.65721	9	2-4,1493-1491;7-15,1488-1480;16-24,1478-1470	1-1,1494-1494[UP5];5-6,1490-1489[SIL];x-x,1479-1479[BULt]	(((((((((.(((((((((..(((.&.)))..)))))))))-)))))))))	GCUUAGGUGAUGGACGGUUGAACGA&ACGUAAAAUCGUCUG-CACCUGAGU	2	64.8361	2	0.335473	Output/R24h/cleaveLand_result/t_plot/PC-3p-110481_70_XM_021127639.1_1485_TPlot.pdf	0	0	NA	NA	NA	64.8361	0	Inf	up	8.1306e-16	3.55976e-15	yes	GO:0009057(macromolecule catabolic process);GO:0036211(protein modification process);GO:0032553(ribonucleotide binding);GO:0036094(small molecule binding);GO:0005737(cytoplasm);GO:0016740(transferase activity);GO:0008152(metabolic process);GO:0016874(ligase activity);GO:0044424(intracellular part);GO:0044238(primary metabolic process);GO:0030163(protein catabolic process);GO:0043226(organelle);GO…	ko04120(Ubiquitin mediated proteolysis)
PC-3p-114045_66	XM_016076521.2	1082	1109	1097	-37.3	-24.4	0.654155	11	1-6,1109-1104;7-13,1100-1094;14-15,1092-1091;17-24,1089-1082	x-x,1103-1101[BULt];x-x,1093-1093[BULt];16-16,1090-1090[SIL]	((((((((.((.(((((((...((((((&))))))---)))))))-)).))))))))	AGUCAGGGGUUCGUCUUGUUCGUGGCAU&AUGCUA---AUAAGAC-AAGUUCUGACU	1	32.4181	4	0.928764	Output/R24h/cleaveLand_result/t_plot/PC-3p-114045_66_XM_016076521.2_1097_TPlot.pdf	0	0	NA	NA	NA	32.4181	0	Inf	up	1.2429e-08	1.41251e-08	yes	GO:0016491(oxidoreductase activity);GO:0003824(catalytic activity);GO:0055114(oxidation-reduction process);GO:0008152(metabolic process)	NA
PC-3p-114045_66	XM_021129892.1	125	149	140	-37.3	-25	0.670241	8.5	1-4,149-146;6-8,144-142;10-22,140-128;23-24,126-125	5-5,145-145[SIL];9-9,141-141[SIL];x-x,127-127[BULt]	((.(((((((((((((.(((.((((&)))).))).)))))))))))))-))	GGCUCGGAGCUUGUCUCGUUCGCGU&AUGCUAAUAAGACAAGUUCUGA-CU	1	32.4181	4	0.854798	Output/R24h/cleaveLand_result/t_plot/PC-3p-114045_66_XM_021129892.1_140_TPlot.pdf	0	0	NA	NA	NA	32.4181	0	Inf	up	1.2429e-08	1.41251e-08	yes	NA	NA
PC-3p-114614_66	BGI_novel_T008593	1630	1653	1644	-37.3	-25.4	0.680965	16	8-18,1646-1636;20-24,1634-1630	1-7,1653-1647[UP5];19-19,1635-1635[SIL]	(((((.(((((((((((.......&.......))))))))))).)))))	ACUCUGGUGAUGGUGUCACUCAUG&AUGUAAAGAUAUCAUCACGAGAGU	1	32.4181	4	0.423813	Output/R24h/cleaveLand_result/t_plot/PC-3p-114614_66_BGI_novel_T008593_1644_TPlot.pdf	0	0	NA	NA	NA	32.4181	0	Inf	up	1.2429e-08	1.41251e-08	yes	GO:0097367(carbohydrate derivative binding);GO:0044464(cell part);GO:0050789(regulation of biological process);GO:0051130(positive regulation of cellular component organization);GO:0036094(small molecule binding);GO:0044430(cytoskeletal part);GO:0030029(actin filament-based process);GO:0044089(positive regulation of cellular component biogenesis);GO:0043228(non-membrane-bounded organelle);GO:0033…	NA
PC-3p-114614_66	XM_016083347.2	756	779	770	-37.3	-27.6	0.739946	9.5	4-6,776-774;8-24,772-756	1-3,779-777[UP5];7-7,773-773[SIL]	(((((((((((((((((.(((...&...))).)))))))))))))))))	GCUCUCGUGAUGAUGUUGUUAAUA&AUGUAAAGAUAUCAUCACGAGAGU	2	64.8361	2	0.029819	Output/R24h/cleaveLand_result/t_plot/PC-3p-114614_66_XM_016083347.2_770_TPlot.pdf	4	158.41	2	0.0219704	Output/R0h/cleaveLand_result/t_plot/PC-3p-114614_66_XM_016083347.2_770_TPlot.pdf	64.8361	158.41	-1.28879	down	3.7754e-10	7.30474e-10	yes	GO:1901576(organic substance biosynthetic process);GO:0006497(protein lipidation);GO:0009987(cellular process);GO:0042158(lipoprotein biosynthetic process);GO:0009058(biosynthetic process);GO:0044260(cellular macromolecule metabolic process);GO:1901566(organonitrogen compound biosynthetic process);GO:0008152(metabolic process);GO:0043412(macromolecule modification);GO:0034645(cellular macromolecu…	NA
PC-3p-114614_66	XM_016084219.2	1864	1888	1878	-37.3	-25.6	0.686327	11.5	2-4,1887-1885;9-24,1879-1864	1-1,1888-1888[UP5];5-8,1884-1880[AILt]	((((((((((((((((.....(((.&.)))-....))))))))))))))))	ACUCUUGUGAUGAUAUGAUGGACAG&AUGU-AAAGAUAUCAUCACGAGAGU	0	0	NA	NA	NA	1	39.6024	4	0.294913	Output/R0h/cleaveLand_result/t_plot/PC-3p-114614_66_XM_016084219.2_1878_TPlot.pdf	0	39.6024	-Inf	down	3.1118e-10	6.0515e-10	yes	NA	NA
PC-3p-114614_66	XM_016086824.2	1920	1947	1934	-37.3	-25.06	0.67185	16	2-5,1946-1943;8-23,1936-1921	1-1,1947-1947[UP5];6-7,1942-1937[AILt];24-24,1920-1920[UP3]	.((((((((((((((((......((((.&.))))----..)))))))))))))))).	UCUCUUGUGGUGAUGUCAAAAGGUACAC&AUGUA----AAGAUAUCAUCACGAGAGU	0	0	NA	NA	NA	1	39.6024	4	0.622709	Output/R0h/cleaveLand_result/t_plot/PC-3p-114614_66_XM_016086824.2_1934_TPlot.pdf	0	39.6024	-Inf	down	3.1118e-10	6.0515e-10	yes	GO:0022604(regulation of cell morphogenesis);GO:0017076(purine nucleotide binding);GO:0018193(peptidyl-amino acid modification);GO:0007267(cell-cell signaling);GO:0050793(regulation of developmental process);GO:0006796(phosphate-containing compound metabolic process);GO:0003824(catalytic activity);GO:0018209(peptidyl-serine modification);GO:0006464(cellular protein modification process);GO:006500…	NA
PC-3p-114614_66	XM_016087566.2	429	452	443	-37.3	-29.9	0.801609	5.5	3-11,450-442;13-24,440-429	1-2,452-451[UP5];12-12,441-441[SIL]	((((((((((((.(((((((((..&..))))))))).))))))))))))	ACUCUUGUGAUGUUAUCUUUACUG&AUGUAAAGAUAUCAUCACGAGAGU	1	32.4181	4	0.0449041	Output/R24h/cleaveLand_result/t_plot/PC-3p-114614_66_XM_016087566.2_443_TPlot.pdf	0	0	NA	NA	NA	32.4181	0	Inf	up	1.2429e-08	1.41251e-08	yes	GO:0034641(cellular nitrogen compound metabolic process);GO:0090304(nucleic acid metabolic process);GO:0008152(metabolic process);GO:0016787(hydrolase activity);GO:0046914(transition metal ion binding);GO:0003676(nucleic acid binding);GO:0046483(heterocycle metabolic process);GO:0043167(ion binding);GO:1901363(heterocyclic compound binding);GO:0043170(macromolecule metabolic process);GO:1901360(o…	ko00020(Citrate cycle (TCA cycle));ko01110(Biosynthesis of secondary metabolites);ko00190(Oxidative phosphorylation);ko01200(Carbon metabolism);ko01100(Metabolic pathways)
PC-3p-114614_66	XM_016105787.2	1400	1423	1414	-37.3	-29.6	0.793566	8	2-5,1422-1419;8-24,1416-1400	1-1,1423-1423[UP5];6-7,1418-1417[SIL]	(((((((((((((((((..((((.&.))))..)))))))))))))))))	GCUCUCGUGGUGAUGUCACUAUAC&AUGUAAAGAUAUCAUCACGAGAGU	1	32.4181	4	0.0665943	Output/R24h/cleaveLand_result/t_plot/PC-3p-114614_66_XM_016105787.2_1414_TPlot.pdf	0	0	NA	NA	NA	32.4181	0	Inf	up	1.2429e-08	1.41251e-08	yes	GO:0044425(membrane part);GO:0031224(intrinsic component of membrane);GO:0046872(metal ion binding);GO:0005509(calcium ion binding);GO:0016020(membrane);GO:0043167(ion binding);GO:0005488(binding);GO:0016021(integral component of membrane);GO:0043169(cation binding)	NA
PC-3p-114614_66	XM_021125110.1	1630	1653	1644	-37.3	-25.4	0.680965	16	8-18,1646-1636;20-24,1634-1630	1-7,1653-1647[UP5];19-19,1635-1635[SIL]	(((((.(((((((((((.......&.......))))))))))).)))))	ACUCUGGUGAUGGUGUCACUCAUG&AUGUAAAGAUAUCAUCACGAGAGU	1	32.4181	4	0.436898	Output/R24h/cleaveLand_result/t_plot/PC-3p-114614_66_XM_021125110.1_1644_TPlot.pdf	0	0	NA	NA	NA	32.4181	0	Inf	up	1.2429e-08	1.41251e-08	yes	GO:0097367(carbohydrate derivative binding);GO:0044464(cell part);GO:0050789(regulation of biological process);GO:0051130(positive regulation of cellular component organization);GO:0036094(small molecule binding);GO:0044430(cytoskeletal part);GO:0030029(actin filament-based process);GO:0044089(positive regulation of cellular component biogenesis);GO:0043228(non-membrane-bounded organelle);GO:0033…	NA
PC-3p-114614_66	XM_021125111.1	1589	1612	1603	-37.3	-25.4	0.680965	16	8-18,1605-1595;20-24,1593-1589	1-7,1612-1606[UP5];19-19,1594-1594[SIL]	(((((.(((((((((((.......&.......))))))))))).)))))	ACUCUGGUGAUGGUGUCACUCAUG&AUGUAAAGAUAUCAUCACGAGAGU	0	0	NA	NA	NA	1	39.6024	4	0.332762	Output/R0h/cleaveLand_result/t_plot/PC-3p-114614_66_XM_021125111.1_1603_TPlot.pdf	0	39.6024	-Inf	down	3.1118e-10	6.0515e-10	yes	GO:0097367(carbohydrate derivative binding);GO:0044464(cell part);GO:0050789(regulation of biological process);GO:0051130(positive regulation of cellular component organization);GO:0036094(small molecule binding);GO:0044430(cytoskeletal part);GO:0030029(actin filament-based process);GO:0044089(positive regulation of cellular component biogenesis);GO:0043228(non-membrane-bounded organelle);GO:0033…	NA
PC-3p-114792_66	BGI_novel_T002926	2070	2096	2085	-48.5	-32.8	0.676289	8.5	1-5,2096-2092;6-9,2090-2087;11-21,2084-2074;22-24,2072-2070	x-x,2091-2091[BULt];10-10,2086-2085[AILt];x-x,2073-2073[BULt]	(((.(((((((((((..((((.(((((&)))))-))))-.)))))))))))-)))	GGUGGCGGUCGAUUUGGAGGUAGGAGU&ACUUC-ACCU-GAAGUCGACCGC-ACC	2	64.8361	2	0.226877	Output/R24h/cleaveLand_result/t_plot/PC-3p-114792_66_BGI_novel_T002926_2085_TPlot.pdf	0	0	NA	NA	NA	64.8361	0	Inf	up	8.1306e-16	3.55976e-15	yes	GO:1901265(nucleoside phosphate binding);GO:0097159(organic cyclic compound binding);GO:1901363(heterocyclic compound binding);GO:0005488(binding);GO:0000166(nucleotide binding);GO:0036094(small molecule binding);GO:0003676(nucleic acid binding)	NA
PC-3p-114792_66	BGI_novel_T002927	2067	2093	2082	-48.5	-32.8	0.676289	8.5	1-5,2093-2089;6-9,2087-2084;11-21,2081-2071;22-24,2069-2067	x-x,2088-2088[BULt];10-10,2083-2082[AILt];x-x,2070-2070[BULt]	(((.(((((((((((..((((.(((((&)))))-))))-.)))))))))))-)))	GGUGGCGGUCGAUUUGGAGGUAGGAGU&ACUUC-ACCU-GAAGUCGACCGC-ACC	1	32.4181	4	0.582273	Output/R24h/cleaveLand_result/t_plot/PC-3p-114792_66_BGI_novel_T002927_2082_TPlot.pdf	0	0	NA	NA	NA	32.4181	0	Inf	up	1.2429e-08	1.41251e-08	yes	GO:1901265(nucleoside phosphate binding);GO:0097159(organic cyclic compound binding);GO:1901363(heterocyclic compound binding);GO:0005488(binding);GO:0000166(nucleotide binding);GO:0036094(small molecule binding);GO:0003676(nucleic acid binding)	NA
PC-3p-114792_66	XM_016089737.2	1607	1637	1622	-48.5	-34.5	0.71134	15	1-7,1637-1631;8-22,1624-1610;23-24,1608-1607	x-x,1630-1625[BULt];x-x,1609-1609[BULt]	((.(((((((((((((((......(((((((&)))))))------)))))))))))))))-))	GGUUGUGGUUGACUUCAGUCAUUUGUGAGGU&ACUUCAC------CUGAAGUCGACCGCA-CC	2	64.8361	2	0.0937009	Output/R24h/cleaveLand_result/t_plot/PC-3p-114792_66_XM_016089737.2_1622_TPlot.pdf	0	0	NA	NA	NA	64.8361	0	Inf	up	8.1306e-16	3.55976e-15	yes	GO:0009059(macromolecule biosynthetic process);GO:0071704(organic substance metabolic process);GO:0009058(biosynthetic process);GO:0071840(cellular component organization or biogenesis);GO:0044264(cellular polysaccharide metabolic process);GO:0005976(polysaccharide metabolic process);GO:0071555(cell wall organization);GO:0009987(cellular process);GO:0044425(membrane part);GO:0071554(cell wall org…	NA
PC-3p-114792_66	XM_016097166.2	2067	2093	2082	-48.5	-32.8	0.676289	8.5	1-5,2093-2089;6-9,2087-2084;11-21,2081-2071;22-24,2069-2067	x-x,2088-2088[BULt];10-10,2083-2082[AILt];x-x,2070-2070[BULt]	(((.(((((((((((..((((.(((((&)))))-))))-.)))))))))))-)))	GGUGGCGGUCGAUUUGGAGGUAGGAGU&ACUUC-ACCU-GAAGUCGACCGC-ACC	3	97.2542	2	0.255586	Output/R24h/cleaveLand_result/t_plot/PC-3p-114792_66_XM_016097166.2_2082_TPlot.pdf	0	0	NA	NA	NA	97.2542	0	Inf	up	6.0829e-23	7.372e-22	yes	GO:1901265(nucleoside phosphate binding);GO:0097159(organic cyclic compound binding);GO:1901363(heterocyclic compound binding);GO:0005488(binding);GO:0000166(nucleotide binding);GO:0036094(small molecule binding);GO:0003676(nucleic acid binding)	NA
PC-3p-114792_66	XM_016097167.2	1935	1961	1950	-48.5	-32.8	0.676289	8.5	1-5,1961-1957;6-9,1955-1952;11-21,1949-1939;22-24,1937-1935	x-x,1956-1956[BULt];10-10,1951-1950[AILt];x-x,1938-1938[BULt]	(((.(((((((((((..((((.(((((&)))))-))))-.)))))))))))-)))	GGUGGCGGUCGAUUUGGAGGUAGGAGU&ACUUC-ACCU-GAAGUCGACCGC-ACC	3	97.2542	2	0.238491	Output/R24h/cleaveLand_result/t_plot/PC-3p-114792_66_XM_016097167.2_1950_TPlot.pdf	0	0	NA	NA	NA	97.2542	0	Inf	up	6.0829e-23	7.372e-22	yes	GO:1901265(nucleoside phosphate binding);GO:0097159(organic cyclic compound binding);GO:1901363(heterocyclic compound binding);GO:0005488(binding);GO:0000166(nucleotide binding);GO:0036094(small molecule binding);GO:0003676(nucleic acid binding)	NA
PC-3p-114792_66	XM_021128836.1	264	291	282	-48.5	-32.9	0.678351	10.5	2-4,290-288;7-14,285-278;15-18,274-271;19-24,269-264	1-1,291-291[UP5];5-6,287-286[SIL];x-x,277-275[BULt];x-x,270-270[BULt]	((((((.((((...((((((((..(((.&.)))..))))))))---))))-))))))	GGUGCGAGUCGGAAGCUUCAGGGAGAGA&ACUUCACCUGAAGU---CGAC-CGCACC	1	32.4181	4	0.474397	Output/R24h/cleaveLand_result/t_plot/PC-3p-114792_66_XM_021128836.1_282_TPlot.pdf	0	0	NA	NA	NA	32.4181	0	Inf	up	1.2429e-08	1.41251e-08	yes	GO:2000112(regulation of cellular macromolecule biosynthetic process);GO:0044464(cell part);GO:0051246(regulation of protein metabolic process);GO:0044248(cellular catabolic process);GO:0043228(non-membrane-bounded organelle);GO:0005737(cytoplasm);GO:0019439(aromatic compound catabolic process);GO:0006139(nucleobase-containing compound metabolic process);GO:0043170(macromolecule metabolic process…	ko03018(RNA degradation)
PC-3p-114792_66	XM_021137498.1	2046	2072	2061	-48.5	-32.8	0.676289	8.5	1-5,2072-2068;6-9,2066-2063;11-21,2060-2050;22-24,2048-2046	x-x,2067-2067[BULt];10-10,2062-2061[AILt];x-x,2049-2049[BULt]	(((.(((((((((((..((((.(((((&)))))-))))-.)))))))))))-)))	GGUGGCGGUCGAUUUGGAGGUAGGAGU&ACUUC-ACCU-GAAGUCGACCGC-ACC	3	97.2542	2	0.232706	Output/R24h/cleaveLand_result/t_plot/PC-3p-114792_66_XM_021137498.1_2061_TPlot.pdf	0	0	NA	NA	NA	97.2542	0	Inf	up	6.0829e-23	7.372e-22	yes	GO:1901265(nucleoside phosphate binding);GO:0097159(organic cyclic compound binding);GO:1901363(heterocyclic compound binding);GO:0005488(binding);GO:0000166(nucleotide binding);GO:0036094(small molecule binding);GO:0003676(nucleic acid binding)	NA
PC-3p-114792_66	XM_021137499.1	2043	2069	2058	-48.5	-32.8	0.676289	8.5	1-5,2069-2065;6-9,2063-2060;11-21,2057-2047;22-24,2045-2043	x-x,2064-2064[BULt];10-10,2059-2058[AILt];x-x,2046-2046[BULt]	(((.(((((((((((..((((.(((((&)))))-))))-.)))))))))))-)))	GGUGGCGGUCGAUUUGGAGGUAGGAGU&ACUUC-ACCU-GAAGUCGACCGC-ACC	1	32.4181	4	0.601031	Output/R24h/cleaveLand_result/t_plot/PC-3p-114792_66_XM_021137499.1_2058_TPlot.pdf	0	0	NA	NA	NA	32.4181	0	Inf	up	1.2429e-08	1.41251e-08	yes	GO:1901265(nucleoside phosphate binding);GO:0097159(organic cyclic compound binding);GO:1901363(heterocyclic compound binding);GO:0005488(binding);GO:0000166(nucleotide binding);GO:0036094(small molecule binding);GO:0003676(nucleic acid binding)	NA
PC-3p-115095_65	BGI_novel_T001873	1448	1473	1461	-39.4	-26.4	0.670051	11	2-8,1472-1466;9-20,1462-1451;22-23,1449-1448	1-1,1473-1473[UP5];x-x,1465-1463[BULt];21-21,1450-1450[SIL]	((.((((((((((((...(((((((.&.)))))))---)))))))))))).))	GAGAUGGAUUGGACCUAUCUCCGGUC&AAUCGGAG---GGUCCAAUUUGUGUU	1	32.4181	4	0.983244	Output/R24h/cleaveLand_result/t_plot/PC-3p-115095_65_BGI_novel_T001873_1461_TPlot.pdf	0	0	NA	NA	NA	32.4181	0	Inf	up	1.2429e-08	1.41251e-08	yes	NA	NA
PC-3p-115095_65	XM_016082637.2	1625	1647	1638	-39.4	-26	0.659898	7.5	3-4,1645-1644;6-23,1642-1625	1-2,1647-1646[UP5];5-5,1643-1643[SIL]	((((((((((((((((((.((..&..)).))))))))))))))))))	AACAUAAAUUGGACUCUUAGAGA&AAUCGGAGGGUCCAAUUUGUGUU	1	32.4181	4	0.997831	Output/R24h/cleaveLand_result/t_plot/PC-3p-115095_65_XM_016082637.2_1638_TPlot.pdf	0	0	NA	NA	NA	32.4181	0	Inf	up	1.2429e-08	1.41251e-08	yes	GO:0003824(catalytic activity);GO:0016747(transferase activity, transferring acyl groups other than amino-acyl groups);GO:0016740(transferase activity);GO:0016746(transferase activity, transferring acyl groups)	ko00940(Phenylpropanoid biosynthesis);ko00945(Stilbenoid, diarylheptanoid and gingerol biosynthesis);ko00941(Flavonoid biosynthesis);ko01100(Metabolic pathways);ko01110(Biosynthesis of secondary metabolites)
PC-3p-115095_65	XM_016086346.2	1533	1555	1546	-39.4	-26.6	0.675127	6.5	2-18,1554-1538;21-23,1535-1533	1-1,1555-1555[UP5];19-20,1537-1536[SIL]	(((..(((((((((((((((((.&.)))))))))))))))))..)))	GACCAAGGUUGGAUCCUUCGAUG&AAUCGGAGGGUCCAAUUUGUGUU	2	64.8361	2	0.67127	Output/R24h/cleaveLand_result/t_plot/PC-3p-115095_65_XM_016086346.2_1546_TPlot.pdf	3	118.807	2	0.557986	Output/R0h/cleaveLand_result/t_plot/PC-3p-115095_65_XM_016086346.2_1546_TPlot.pdf	64.8361	118.807	-0.873752	down	6.8096e-05	7.44087e-05	yes	GO:1901576(organic substance biosynthetic process);GO:0016053(organic acid biosynthetic process);GO:0009987(cellular process);GO:0008652(cellular amino acid biosynthetic process);GO:0016614(oxidoreductase activity, acting on CH-OH group of donors);GO:1901607(alpha-amino acid biosynthetic process);GO:0006520(cellular amino acid metabolic process);GO:0009069(serine family amino acid metabolic proce…	ko01230(Biosynthesis of amino acids);ko01100(Metabolic pathways);ko01200(Carbon metabolism);ko00260(Glycine, serine and threonine metabolism)
PC-3p-115095_65	XM_016086355.2	854	880	871	-39.4	-28.7	0.728426	6.5	1-14,880-867;15-23,862-854	x-x,866-863[BULt]	(((((((((....((((((((((((((&))))))))))))))----)))))))))	AAUAUAAGUGGGAUGGAUCCUCCGAUU&AAUCGGAGGGUCCA----AUUUGUGUU	0	0	NA	NA	NA	1	39.6024	4	0.642962	Output/R0h/cleaveLand_result/t_plot/PC-3p-115095_65_XM_016086355.2_871_TPlot.pdf	0	39.6024	-Inf	down	3.1118e-10	6.0515e-10	yes	NA	NA
PC-3p-115095_65	XM_016088755.2	1759	1781	1772	-39.4	-30.3	0.769036	10	5-17,1777-1765;19-22,1763-1760	1-4,1781-1778[UP5];18-18,1764-1764[SIL];23-23,1759-1759[UP3]	.((((.(((((((((((((....&....))))))))))))).)))).	UGCACCAGUUGGACCCUCCAAUG&AAUCGGAGGGUCCAAUUUGUGUU	0	0	NA	NA	NA	1	39.6024	4	0.152548	Output/R0h/cleaveLand_result/t_plot/PC-3p-115095_65_XM_016088755.2_1772_TPlot.pdf	0	39.6024	-Inf	down	3.1118e-10	6.0515e-10	yes	GO:0044237(cellular metabolic process);GO:0009987(cellular process);GO:0006793(phosphorus metabolic process);GO:0016772(transferase activity, transferring phosphorus-containing groups);GO:0016301(kinase activity);GO:0016310(phosphorylation);GO:0008152(metabolic process);GO:0006796(phosphate-containing compound metabolic process);GO:0016740(transferase activity);GO:0003824(catalytic activity);GO:0…	NA
PC-3p-115095_65	XM_016091321.2	324	346	337	-39.4	-27.9	0.708122	7.5	4-17,343-330;19-19,328-328;21-23,326-324	1-3,346-344[UP5];18-18,329-329[SIL];20-20,327-327[SIL]	(((.(.((((((((((((((...&...)))))))))))))).).)))	AACCCCGAUUGGACCCUCCGCCU&AAUCGGAGGGUCCAAUUUGUGUU	1	32.4181	4	0.804265	Output/R24h/cleaveLand_result/t_plot/PC-3p-115095_65_XM_016091321.2_337_TPlot.pdf	0	0	NA	NA	NA	32.4181	0	Inf	up	1.2429e-08	1.41251e-08	yes	GO:0008270(zinc ion binding);GO:0006012(galactose metabolic process);GO:0043167(ion binding);GO:0008152(metabolic process);GO:0043169(cation binding);GO:0046872(metal ion binding);GO:0019318(hexose metabolic process);GO:0016740(transferase activity);GO:0003824(catalytic activity);GO:0070569(uridylyltransferase activity);GO:0016772(transferase activity, transferring phosphorus-containing groups);G…	ko01100(Metabolic pathways);ko00520(Amino sugar and nucleotide sugar metabolism);ko00052(Galactose metabolism)
PC-3p-115095_65	XM_016092063.2	914	936	927	-39.4	-25.7	0.652284	8.5	1-4,936-933;6-15,931-922;18-20,919-917	5-5,932-932[SIL];16-17,921-920[SIL];21-23,916-914[UP3]	...(((..((((((((((.((((&)))).))))))))))..)))...	UGAGCAUCUUGGACCCUUGGAUU&AAUCGGAGGGUCCAAUUUGUGUU	0	0	NA	NA	NA	1	39.6024	4	0.998399	Output/R0h/cleaveLand_result/t_plot/PC-3p-115095_65_XM_016092063.2_927_TPlot.pdf	0	39.6024	-Inf	down	3.1118e-10	6.0515e-10	yes	GO:0072528(pyrimidine-containing compound biosynthetic process);GO:0006139(nucleobase-containing compound metabolic process);GO:1901293(nucleoside phosphate biosynthetic process);GO:0006221(pyrimidine nucleotide biosynthetic process);GO:0097159(organic cyclic compound binding);GO:0005622(intracellular);GO:0016772(transferase activity, transferring phosphorus-containing groups);GO:0034641(cellular…	ko00240(Pyrimidine metabolism);ko01100(Metabolic pathways)
PC-3p-115095_65	XM_016095087.2	319	343	334	-39.4	-27.2	0.690355	9	2-5,342-339;7-16,337-328;17-23,325-319	1-1,343-343[UP5];6-6,338-338[SIL];x-x,327-326[BULt]	(((((((..((((((((((.((((.&.)))).))))))))))--)))))))	GGCGCAAAGGUUGGGCCUUGCGAUC&AAUCGGAGGGUCCAAU--UUGUGUU	0	0	NA	NA	NA	1	39.6024	4	0.835089	Output/R0h/cleaveLand_result/t_plot/PC-3p-115095_65_XM_016095087.2_334_TPlot.pdf	0	39.6024	-Inf	down	3.1118e-10	6.0515e-10	yes	GO:0043231(intracellular membrane-bounded organelle);GO:0044424(intracellular part);GO:0043169(cation binding);GO:0005634(nucleus);GO:0003676(nucleic acid binding);GO:0010468(regulation of gene expression);GO:2000112(regulation of cellular macromolecule biosynthetic process);GO:0005623(cell);GO:0044464(cell part);GO:2001141(regulation of RNA biosynthetic process);GO:0065007(biological regulation)…	NA
PC-3p-115095_65	XM_016095093.2	457	481	472	-39.4	-25.98	0.659391	11.5	4-13,478-469;16-22,464-458	1-3,481-479[UP5];14-15,468-465[AILt];23-23,457-457[UP3]	.(((((((....((((((((((...&...))))))))))--..))))))).	UACACAAGGGCAGGACCCUCUGUUU&AAUCGGAGGGUCC--AAUUUGUGUU	0	0	NA	NA	NA	2	79.2048	3	0.334735	Output/R0h/cleaveLand_result/t_plot/PC-3p-115095_65_XM_016095093.2_472_TPlot.pdf	0	79.2048	-Inf	down	5.5905e-19	3.88279e-18	yes	GO:0019222(regulation of metabolic process);GO:0000079(regulation of cyclin-dependent protein serine/threonine kinase activity);GO:0050790(regulation of catalytic activity);GO:0051174(regulation of phosphorus metabolic process);GO:1904029(regulation of cyclin-dependent protein kinase activity);GO:0051171(regulation of nitrogen compound metabolic process);GO:0031399(regulation of protein modificat…	ko01110(Biosynthesis of secondary metabolites);ko00630(Glyoxylate and dicarboxylate metabolism);ko01200(Carbon metabolism);ko01210(2-Oxocarboxylic acid metabolism);ko01100(Metabolic pathways);ko01230(Biosynthesis of amino acids);ko00020(Citrate cycle (TCA cycle))
PC-3p-115095_65	XM_016099628.2	3356	3377	3368	-39.4	-27	0.685279	9.5	4-14,3374-3364;16-18,3363-3361;20-23,3359-3356	1-3,3377-3375[UP5];15-15,x-x[BULq];19-19,3360-3360[SIL]	((((.(((-(((((((((((...&...))))))))))).))).))))	GACAGAGG-UGGACCCUCUGGAG&AAUCGGAGGGUCCAAUUUGUGUU	1	32.4181	4	0.933508	Output/R24h/cleaveLand_result/t_plot/PC-3p-115095_65_XM_016099628.2_3368_TPlot.pdf	0	0	NA	NA	NA	32.4181	0	Inf	up	1.2429e-08	1.41251e-08	yes	GO:0003723(RNA binding);GO:0097159(organic cyclic compound binding);GO:1901363(heterocyclic compound binding);GO:0005488(binding);GO:0003676(nucleic acid binding)	ko03013(RNA transport);ko03015(mRNA surveillance pathway)
PC-3p-115095_65	XM_016100746.2	234	256	247	-39.4	-28.7	0.728426	9	5-14,252-243;16-23,241-234	1-4,256-253[UP5];15-15,242-242[SIL]	((((((((.((((((((((....&....)))))))))).))))))))	AACACAAAAUGGAUCCUCCUCCU&AAUCGGAGGGUCCAAUUUGUGUU	1	32.4181	4	0.730015	Output/R24h/cleaveLand_result/t_plot/PC-3p-115095_65_XM_016100746.2_247_TPlot.pdf	0	0	NA	NA	NA	32.4181	0	Inf	up	1.2429e-08	1.41251e-08	yes	GO:1901564(organonitrogen compound metabolic process);GO:0003824(catalytic activity);GO:0019752(carboxylic acid metabolic process);GO:0009987(cellular process);GO:0006082(organic acid metabolic process);GO:0016740(transferase activity);GO:0044238(primary metabolic process);GO:0043436(oxoacid metabolic process);GO:0004084(branched-chain-amino-acid transaminase activity);GO:0016769(transferase acti…	ko00270(Cysteine and methionine metabolism);ko01110(Biosynthesis of secondary metabolites);ko00770(Pantothenate and CoA biosynthesis);ko01210(2-Oxocarboxylic acid metabolism);ko01100(Metabolic pathways);ko00280(Valine, leucine and isoleucine degradation);ko00290(Valine, leucine and isoleucine biosynthesis);ko01230(Biosynthesis of amino acids)
PC-3p-115095_65	XM_016101439.2	333	354	345	-39.4	-28.8	0.730964	7	1-13,354-342;17-21,339-335	14-16,341-340[AILq];22-23,334-333[UP3]	..(((((..-(((((((((((((&)))))))))))))...)))))..	GCCACGGCG-GGGCCCUCCGAUU&AAUCGGAGGGUCCAAUUUGUGUU	1	32.4181	4	0.704032	Output/R24h/cleaveLand_result/t_plot/PC-3p-115095_65_XM_016101439.2_345_TPlot.pdf	0	0	NA	NA	NA	32.4181	0	Inf	up	1.2429e-08	1.41251e-08	yes	GO:0008270(zinc ion binding);GO:0043167(ion binding);GO:0031224(intrinsic component of membrane);GO:0044425(membrane part);GO:0005488(binding);GO:0046872(metal ion binding);GO:0043169(cation binding);GO:0016021(integral component of membrane);GO:0016020(membrane);GO:0046914(transition metal ion binding)	ko04141(Protein processing in endoplasmic reticulum)
PC-3p-115095_65	XM_016101888.2	1573	1603	1590	-39.4	-27	0.685279	14.5	2-9,1602-1595;10-15,1590-1585;16-23,1580-1573	1-1,1603-1603[UP5];x-x,1594-1591[BULt];x-x,1584-1581[BULt]	((((((((....((((((....((((((((.&.))))))))----))))))----))))))))	GACACAGGAGACUUGGACUAUACCUCCGAUC&AAUCGGAGG----GUCCAA----UUUGUGUU	0	0	NA	NA	NA	2	79.2048	2	0.469076	Output/R0h/cleaveLand_result/t_plot/PC-3p-115095_65_XM_016101888.2_1590_TPlot.pdf	0	79.2048	-Inf	down	5.5905e-19	3.88279e-18	yes	GO:0005975(carbohydrate metabolic process);GO:0004553(hydrolase activity, hydrolyzing O-glycosyl compounds);GO:0008152(metabolic process);GO:0044238(primary metabolic process);GO:0005576(extracellular region);GO:0009987(cellular process);GO:0071555(cell wall organization);GO:0016043(cellular component organization);GO:0071554(cell wall organization or biogenesis);GO:0071840(cellular component org…	ko01100(Metabolic pathways);ko00040(Pentose and glucuronate interconversions)
PC-3p-115095_65	XM_016105533.2	254	278	269	-39.4	-26.1	0.662437	10	3-6,276-273;8-17,271-262;18-23,259-254	1-2,278-277[UP5];7-7,272-272[SIL];x-x,261-260[BULt]	((((((..((((((((((.((((..&..)))).))))))))))--))))))	GACACAAAGAUUGGAUCCGUCGACU&AAUCGGAGGGUCCAAUU--UGUGUU	1	32.4181	4	0.997676	Output/R24h/cleaveLand_result/t_plot/PC-3p-115095_65_XM_016105533.2_269_TPlot.pdf	0	0	NA	NA	NA	32.4181	0	Inf	up	1.2429e-08	1.41251e-08	yes	GO:0043167(ion binding);GO:0097159(organic cyclic compound binding);GO:1901681(sulfur compound binding);GO:0046872(metal ion binding);GO:0016831(carboxy-lyase activity);GO:0016830(carbon-carbon lyase activity);GO:0043168(anion binding);GO:0000287(magnesium ion binding);GO:0019842(vitamin binding);GO:0050662(coenzyme binding);GO:0003824(catalytic activity);GO:0043169(cation binding);GO:0036094(sma…	ko01110(Biosynthesis of secondary metabolites);ko00010(Glycolysis / Gluconeogenesis);ko01100(Metabolic pathways)
PC-3p-115095_65	XM_016108308.2	308	332	322	-39.4	-25.9	0.65736	9.5	3-8,330-325;9-13,323-319;16-19,316-313;20-23,311-308	1-2,332-331[UP5];x-x,324-324[BULt];14-15,318-317[SIL];x-x,312-312[BULt]	((((.((((..(((((.((((((..&..))))))-)))))..))))-))))	GGCGUCAAAGAGGACCUCUCCGAGC&AAUCGGAG-GGUCCAAUUUG-UGUU	0	0	NA	NA	NA	1	39.6024	4	0.995347	Output/R0h/cleaveLand_result/t_plot/PC-3p-115095_65_XM_016108308.2_322_TPlot.pdf	0	39.6024	-Inf	down	3.1118e-10	6.0515e-10	yes	NA	NA
PC-3p-115095_65	XM_016108425.2	1002	1024	1015	-39.4	-25.7	0.652284	12.5	6-9,1019-1016;11-23,1014-1002	1-5,1024-1020[UP5];10-10,1015-1015[SIL]	(((((((((((((.((((.....&.....)))).)))))))))))))	GACACAAAUUGGAGUCUCGUAUG&AAUCGGAGGGUCCAAUUUGUGUU	4	129.672	2	0.931894	Output/R24h/cleaveLand_result/t_plot/PC-3p-115095_65_XM_016108425.2_1015_TPlot.pdf	1	39.6024	4	0.998539	Output/R0h/cleaveLand_result/t_plot/PC-3p-115095_65_XM_016108425.2_1015_TPlot.pdf	129.672	39.6024	1.71121	up	4.418e-12	1.82971e-11	yes	GO:0008194(UDP-glycosyltransferase activity);GO:0016758(transferase activity, transferring hexosyl groups);GO:0042285(xylosyltransferase activity);GO:0044038(cell wall macromolecule biosynthetic process);GO:0005976(polysaccharide metabolic process);GO:0009059(macromolecule biosynthetic process);GO:0005975(carbohydrate metabolic process);GO:0016763(transferase activity, transferring pentosyl group…	NA
PC-3p-115095_65	XM_016108471.2	799	823	814	-39.4	-27.1	0.687817	7.5	2-4,822-820;6-11,818-813;12-15,811-808;16-23,806-799	1-1,823-823[UP5];5-5,819-819[SIL];x-x,812-812[BULt];x-x,807-807[BULt]	((((((((.((((.((((((.(((.&.))).))))))-))))-))))))))	GACACAAACUUGGCACCCUUGGAUC&AAUCGGAGGGU-CCAA-UUUGUGUU	1	32.4181	4	0.923681	Output/R24h/cleaveLand_result/t_plot/PC-3p-115095_65_XM_016108471.2_814_TPlot.pdf	0	0	NA	NA	NA	32.4181	0	Inf	up	1.2429e-08	1.41251e-08	yes	GO:0005576(extracellular region);GO:0043167(ion binding);GO:0004601(peroxidase activity);GO:0098754(detoxification);GO:0016209(antioxidant activity);GO:0006979(response to oxidative stress);GO:0042743(hydrogen peroxide metabolic process);GO:0016491(oxidoreductase activity);GO:0005488(binding);GO:0009056(catabolic process);GO:0003824(catalytic activity);GO:0046906(tetrapyrrole binding);GO:0098869(…	ko00940(Phenylpropanoid biosynthesis);ko01100(Metabolic pathways);ko01110(Biosynthesis of secondary metabolites)
PC-3p-115095_65	XM_021134214.1	1549	1571	1562	-39.4	-30.3	0.769036	10	5-17,1567-1555;19-22,1553-1550	1-4,1571-1568[UP5];18-18,1554-1554[SIL];23-23,1549-1549[UP3]	.((((.(((((((((((((....&....))))))))))))).)))).	UGCACCAGUUGGACCCUCCAAUG&AAUCGGAGGGUCCAAUUUGUGUU	0	0	NA	NA	NA	1	39.6024	4	0.167992	Output/R0h/cleaveLand_result/t_plot/PC-3p-115095_65_XM_021134214.1_1562_TPlot.pdf	0	39.6024	-Inf	down	3.1118e-10	6.0515e-10	yes	GO:0044237(cellular metabolic process);GO:0009987(cellular process);GO:0006793(phosphorus metabolic process);GO:0016772(transferase activity, transferring phosphorus-containing groups);GO:0016301(kinase activity);GO:0016310(phosphorylation);GO:0008152(metabolic process);GO:0006796(phosphate-containing compound metabolic process);GO:0016740(transferase activity);GO:0003824(catalytic activity);GO:0…	NA
PC-3p-115095_65	XM_021135221.1	1793	1818	1806	-39.4	-26.4	0.670051	11	2-8,1817-1811;9-20,1807-1796;22-23,1794-1793	1-1,1818-1818[UP5];x-x,1810-1808[BULt];21-21,1795-1795[SIL]	((.((((((((((((...(((((((.&.)))))))---)))))))))))).))	GAGAUGGAUUGGACCUAUCUCCGGUC&AAUCGGAG---GGUCCAAUUUGUGUU	1	32.4181	4	0.987852	Output/R24h/cleaveLand_result/t_plot/PC-3p-115095_65_XM_021135221.1_1806_TPlot.pdf	0	0	NA	NA	NA	32.4181	0	Inf	up	1.2429e-08	1.41251e-08	yes	NA	NA
PC-3p-115095_65	XM_021138446.1	288	310	301	-39.4	-26.12	0.662944	10	3-11,308-300;12-14,298-296;19-23,292-288	1-2,310-309[UP5];x-x,299-299[BULt];15-18,295-293[AILq]	(((((...-(((.(((((((((..&..)))))))))-)))....)))))	AACACUGG-UGGCACCCUCCGGCA&AAUCGGAGGGU-CCAAUUUGUGUU	1	32.4181	4	0.996059	Output/R24h/cleaveLand_result/t_plot/PC-3p-115095_65_XM_021138446.1_301_TPlot.pdf	0	0	NA	NA	NA	32.4181	0	Inf	up	1.2429e-08	1.41251e-08	yes	NA	ko03050(Proteasome)
PC-3p-115095_65	XM_021138496.1	3172	3193	3184	-39.4	-27	0.685279	9.5	4-14,3190-3180;16-18,3179-3177;20-23,3175-3172	1-3,3193-3191[UP5];15-15,x-x[BULq];19-19,3176-3176[SIL]	((((.(((-(((((((((((...&...))))))))))).))).))))	GACAGAGG-UGGACCCUCUGGAG&AAUCGGAGGGUCCAAUUUGUGUU	1	32.4181	4	0.928764	Output/R24h/cleaveLand_result/t_plot/PC-3p-115095_65_XM_021138496.1_3184_TPlot.pdf	0	0	NA	NA	NA	32.4181	0	Inf	up	1.2429e-08	1.41251e-08	yes	GO:0003723(RNA binding);GO:0097159(organic cyclic compound binding);GO:1901363(heterocyclic compound binding);GO:0005488(binding);GO:0003676(nucleic acid binding)	ko03013(RNA transport);ko03015(mRNA surveillance pathway)
PC-3p-116071_65	BGI_novel_T001056	1573	1596	1587	-37.3	-24.54	0.657909	13	1-3,1596-1594;9-24,1588-1573	4-8,1593-1589[SIL]	((((((((((((((((.....(((&))).....))))))))))))))))	AGUUUAAGGGGCUAGUUGAUGUGU&AUAAAAAUACUGGCCUCUUAGACU	0	0	NA	NA	NA	1	39.6024	4	0.642962	Output/R0h/cleaveLand_result/t_plot/PC-3p-116071_65_BGI_novel_T001056_1587_TPlot.pdf	0	39.6024	-Inf	down	3.1118e-10	6.0515e-10	yes	GO:0006412(translation);GO:0043170(macromolecule metabolic process);GO:0005737(cytoplasm);GO:0044271(cellular nitrogen compound biosynthetic process);GO:0034645(cellular macromolecule biosynthetic process);GO:0044422(organelle part);GO:0043604(amide biosynthetic process);GO:0006810(transport);GO:0005740(mitochondrial envelope);GO:0005215(transporter activity);GO:0005743(mitochondrial inner membra…	NA
PC-3p-116071_65	XM_016081948.2	924	947	938	-37.3	-24.54	0.657909	13	1-3,947-945;9-24,939-924	4-8,944-940[SIL]	((((((((((((((((.....(((&))).....))))))))))))))))	AGUUUAAGGGGCUAGUUGAUGUGU&AUAAAAAUACUGGCCUCUUAGACU	0	0	NA	NA	NA	1	39.6024	4	0.649468	Output/R0h/cleaveLand_result/t_plot/PC-3p-116071_65_XM_016081948.2_938_TPlot.pdf	0	39.6024	-Inf	down	3.1118e-10	6.0515e-10	yes	GO:0006412(translation);GO:0043170(macromolecule metabolic process);GO:0005737(cytoplasm);GO:0044271(cellular nitrogen compound biosynthetic process);GO:0034645(cellular macromolecule biosynthetic process);GO:0044422(organelle part);GO:0043604(amide biosynthetic process);GO:0006810(transport);GO:0005740(mitochondrial envelope);GO:0005215(transporter activity);GO:0005743(mitochondrial inner membra…	NA
PC-3p-116071_65	XM_016102029.2	849	872	863	-37.3	-26.4	0.707775	12.5	6-18,867-855;20-23,853-850	1-5,872-868[UP5];19-19,854-854[SIL];24-24,849-849[UP3]	.((((.(((((((((((((.....&.....))))))))))))).)))).	CGUUUCAGAGGCCAGUGUUGUGUA&AUAAAAAUACUGGCCUCUUAGACU	0	0	NA	NA	NA	1	39.6024	4	0.152548	Output/R0h/cleaveLand_result/t_plot/PC-3p-116071_65_XM_016102029.2_863_TPlot.pdf	0	39.6024	-Inf	down	3.1118e-10	6.0515e-10	yes	GO:0046903(secretion);GO:0051640(organelle localization);GO:0006904(vesicle docking involved in exocytosis);GO:0051234(establishment of localization);GO:0048278(vesicle docking);GO:0032940(secretion by cell);GO:0006887(exocytosis);GO:0009987(cellular process);GO:0140056(organelle localization by membrane tethering);GO:0016192(vesicle-mediated transport);GO:0051641(cellular localization);GO:002240…	NA
PC-3p-117208_64	BGI_novel_T011301	2558	2584	2575	-39.9	-26.5	0.66416	9	1-2,2584-2583;5-11,2580-2574;12-18,2572-2566;19-24,2563-2558	3-4,2582-2581[SIL];x-x,2573-2573[BULt];x-x,2565-2564[BULt]	((((((..(((((((.(((((((..((&))..)))))))-)))))))--))))))	GUUGAUGAAGCCGAGAAGUUGUUUUAU&AUUUAACGACU-CUCGGCU--AUCAAC	1	32.4181	4	0.947155	Output/R24h/cleaveLand_result/t_plot/PC-3p-117208_64_BGI_novel_T011301_2575_TPlot.pdf	0	0	NA	NA	NA	32.4181	0	Inf	up	1.2429e-08	1.41251e-08	yes	NA	NA
PC-3p-117208_64	BGI_novel_T011360	1213	1238	1229	-39.9	-26.1	0.654135	9.5	1-6,1238-1233;9-15,1230-1224;16-24,1221-1213	7-8,1232-1231[SIL];x-x,1223-1222[BULt]	(((((((((..(((((((..((((((&))))))..)))))))--)))))))))	GUUGAUGGCGACGAGGGUGAUUGGAU&AUUUAACGACUCUCG--GCUAUCAAC	0	0	NA	NA	NA	1	39.6024	4	0.956929	Output/R0h/cleaveLand_result/t_plot/PC-3p-117208_64_BGI_novel_T011360_1229_TPlot.pdf	0	39.6024	-Inf	down	3.1118e-10	6.0515e-10	yes	GO:0016070(RNA metabolic process);GO:0032501(multicellular organismal process);GO:0044424(intracellular part);GO:0048229(gametophyte development);GO:0006139(nucleobase-containing compound metabolic process);GO:0010467(gene expression);GO:0034641(cellular nitrogen compound metabolic process);GO:0008152(metabolic process);GO:0006396(RNA processing);GO:1901360(organic cyclic compound metabolic proce…	ko03008(Ribosome biogenesis in eukaryotes)
PC-3p-117208_64	XM_016086718.2	235	258	250	-39.9	-27.4	0.686717	7.5	2-8,257-251;10-18,250-242;20-24,239-235	1-1,258-258[UP5];9-9,x-x[BULq];19-19,241-240[AILt]	(((((..(((((((((-(((((((.&.))))))).)))))))))-.)))))	GUUGAGCAGCUGAGGG-CGUUGAAG&AUUUAACGACUCUCGGCU-AUCAAC	0	0	NA	NA	NA	1	39.6024	4	0.852318	Output/R0h/cleaveLand_result/t_plot/PC-3p-117208_64_XM_016086718.2_250_TPlot.pdf	0	39.6024	-Inf	down	3.1118e-10	6.0515e-10	yes	GO:0032991(macromolecular complex);GO:0005488(binding);GO:0016272(prefoldin complex);GO:0009987(cellular process);GO:0043234(protein complex);GO:0051082(unfolded protein binding);GO:0006457(protein folding);GO:0005515(protein binding)	NA
PC-3p-117208_64	XM_016087891.2	1647	1670	1661	-39.9	-32.9	0.824561	2.5	1-16,1670-1655;18-24,1653-1647	17-17,1654-1654[SIL]	(((((((.((((((((((((((((&)))))))))))))))).)))))))	GUUGAUAUCUGAGAGUCGUUAGAU&AUUUAACGACUCUCGGCUAUCAAC	3	97.2542	2	0.107316	Output/R24h/cleaveLand_result/t_plot/PC-3p-117208_64_XM_016087891.2_1661_TPlot.pdf	1	39.6024	4	0.241088	Output/R0h/cleaveLand_result/t_plot/PC-3p-117208_64_XM_016087891.2_1661_TPlot.pdf	97.2542	39.6024	1.29617	up	8.2959e-07	9.29693e-07	yes	GO:0006807(nitrogen compound metabolic process);GO:0006508(proteolysis);GO:0044238(primary metabolic process);GO:0019538(protein metabolic process);GO:0030163(protein catabolic process);GO:1901564(organonitrogen compound metabolic process);GO:0008233(peptidase activity);GO:0003824(catalytic activity);GO:0004175(endopeptidase activity);GO:0070001(aspartic-type peptidase activity);GO:1901565(organo…	ko03010(Ribosome)
PC-3p-117208_64	XM_016100506.2	717	741	732	-39.9	-26.3	0.659148	16	7-14,735-728;15-21,726-720	1-6,741-736[UP5];x-x,727-727[BULt];22-24,719-717[UP3]	...(((((((.((((((((......&......))))))))-)))))))...	UUCGGUGGCCGGAGAGUCGGGACUC&AUUUAACGACUCUC-GGCUAUCAAC	1	32.4181	4	0.952889	Output/R24h/cleaveLand_result/t_plot/PC-3p-117208_64_XM_016100506.2_732_TPlot.pdf	0	0	NA	NA	NA	32.4181	0	Inf	up	1.2429e-08	1.41251e-08	yes	GO:0016020(membrane);GO:0016021(integral component of membrane);GO:0016740(transferase activity);GO:0032259(methylation);GO:0008168(methyltransferase activity);GO:0044425(membrane part);GO:0008152(metabolic process);GO:0016741(transferase activity, transferring one-carbon groups);GO:0031224(intrinsic component of membrane);GO:0003824(catalytic activity)	NA
PC-3p-117208_64	XM_016102742.2	1314	1337	1328	-39.9	-27.4	0.686717	9.5	1-3,1337-1335;5-19,1333-1319	4-4,1334-1334[SIL];20-24,1318-1314[UP3]	.....(((((((((((((((.(((&))).))))))))))))))).....	CGUCUUGGCCGAGGGUCGUUUGAU&AUUUAACGACUCUCGGCUAUCAAC	1	32.4181	4	0.912403	Output/R24h/cleaveLand_result/t_plot/PC-3p-117208_64_XM_016102742.2_1328_TPlot.pdf	4	158.41	3	0.138852	Output/R0h/cleaveLand_result/t_plot/PC-3p-117208_64_XM_016102742.2_1328_TPlot.pdf	32.4181	158.41	-2.28879	down	7.445e-20	8.65385e-19	yes	GO:0004013(adenosylhomocysteinase activity);GO:0034641(cellular nitrogen compound metabolic process);GO:0044281(small molecule metabolic process);GO:0044238(primary metabolic process);GO:0009116(nucleoside metabolic process);GO:0006534(cysteine metabolic process);GO:0071704(organic substance metabolic process);GO:0046128(purine ribonucleoside metabolic process);GO:0019752(carboxylic acid metaboli…	ko00270(Cysteine and methionine metabolism);ko01100(Metabolic pathways)
PC-3p-117208_64	XM_021132296.1	1145	1170	1161	-39.9	-26.1	0.654135	9.5	1-6,1170-1165;9-15,1162-1156;16-24,1153-1145	7-8,1164-1163[SIL];x-x,1155-1154[BULt]	(((((((((..(((((((..((((((&))))))..)))))))--)))))))))	GUUGAUGGCGACGAGGGUGAUUGGAU&AUUUAACGACUCUCG--GCUAUCAAC	0	0	NA	NA	NA	2	79.2048	0	0.0348428	Output/R0h/cleaveLand_result/t_plot/PC-3p-117208_64_XM_021132296.1_1161_TPlot.pdf	0	79.2048	-Inf	down	5.5905e-19	3.88279e-18	yes	GO:0016070(RNA metabolic process);GO:0032501(multicellular organismal process);GO:0044424(intracellular part);GO:0048229(gametophyte development);GO:0006139(nucleobase-containing compound metabolic process);GO:0010467(gene expression);GO:0034641(cellular nitrogen compound metabolic process);GO:0008152(metabolic process);GO:0006396(RNA processing);GO:1901360(organic cyclic compound metabolic proce…	ko03008(Ribosome biogenesis in eukaryotes)
PC-3p-117669_63	BGI_novel_T000210	1595	1616	1608	-38.4	-25.2	0.65625	8.5	3-7,1614-1610;9-13,1609-1605;15-24,1604-1595	1-2,1616-1615[UP5];8-8,x-x[BULq];14-14,x-x[BULq]	((((((((((-(((((-(((((..&..))))).))))).))))))))))	GGUGAAGUUG-CUUCA-GUGGACC&AUUUCAUAUGAAGUCGACUUCACC	1	32.4181	4	0.927108	Output/R24h/cleaveLand_result/t_plot/PC-3p-117669_63_BGI_novel_T000210_1608_TPlot.pdf	0	0	NA	NA	NA	32.4181	0	Inf	up	1.2429e-08	1.41251e-08	yes	NA	NA
PC-3p-117669_63	XM_016089974.2	952	976	966	-38.4	-30.3	0.789062	7.5	1-7,976-970;9-15,967-961;17-24,959-952	8-8,969-968[AILt];16-16,960-960[SIL]	((((((((.(((((((..(((((((&)))))))-.))))))).))))))))	GGUGAAGUGGGCUUCAAGAUGGGAU&AUUUCAU-AUGAAGUCGACUUCACC	0	0	NA	NA	NA	1	39.6024	4	0.254918	Output/R0h/cleaveLand_result/t_plot/PC-3p-117669_63_XM_016089974.2_966_TPlot.pdf	0	39.6024	-Inf	down	3.1118e-10	6.0515e-10	yes	GO:0016020(membrane);GO:0031224(intrinsic component of membrane);GO:0044425(membrane part);GO:0016021(integral component of membrane)	NA
PC-3p-117669_63	XM_016095241.2	2256	2280	2271	-38.4	-25	0.651042	6.5	1-11,2280-2270;14-16,2267-2265;17-24,2263-2256	12-13,2269-2268[SIL];x-x,2264-2264[BULt]	((((((((.(((..(((((((((((&)))))))))))..)))-))))))))	GGUGAGGUAUGGAAUCAUAUGAGAU&AUUUCAUAUGAAGUCG-ACUUCACC	1	32.4181	4	0.951794	Output/R24h/cleaveLand_result/t_plot/PC-3p-117669_63_XM_016095241.2_2271_TPlot.pdf	0	0	NA	NA	NA	32.4181	0	Inf	up	1.2429e-08	1.41251e-08	yes	GO:0017111(nucleoside-triphosphatase activity);GO:0003824(catalytic activity);GO:0016462(pyrophosphatase activity);GO:0016887(ATPase activity);GO:0042623(ATPase activity, coupled);GO:0016818(hydrolase activity, acting on acid anhydrides, in phosphorus-containing anhydrides);GO:0016817(hydrolase activity, acting on acid anhydrides);GO:0008568(microtubule-severing ATPase activity);GO:0016787(hydrol…	ko01100(Metabolic pathways);ko00500(Starch and sucrose metabolism)
PC-3p-117669_63	XM_016100780.2	218	239	231	-38.4	-25.5	0.664062	7.5	3-7,237-233;9-15,232-226;17-24,225-218	1-2,239-238[UP5];8-8,x-x[BULq];16-16,x-x[BULq]	((((((((-(((((((-(((((..&..))))).))))))).))))))))	GGUGGAGU-GACUUCA-AUGGAUC&AUUUCAUAUGAAGUCGACUUCACC	2	64.8361	2	0.534379	Output/R24h/cleaveLand_result/t_plot/PC-3p-117669_63_XM_016100780.2_231_TPlot.pdf	0	0	NA	NA	NA	64.8361	0	Inf	up	8.1306e-16	3.55976e-15	yes	GO:0022857(transmembrane transporter activity);GO:0008643(carbohydrate transport);GO:0015145(monosaccharide transmembrane transporter activity);GO:0046323(glucose import);GO:0051234(establishment of localization);GO:0016020(membrane);GO:0008324(cation transmembrane transporter activity);GO:0006811(ion transport);GO:0008645(hexose transport);GO:0015149(hexose transmembrane transporter activity);GO…	ko01100(Metabolic pathways);ko00500(Starch and sucrose metabolism)
PC-3p-117669_63	XM_021131035.1	1601	1623	1614	-38.4	-25.6	0.666667	9	4-13,1620-1611;15-24,1610-1601	1-3,1623-1621[UP5];14-14,x-x[BULq]	((((((((((-((((((((((...&...)))))))))).))))))))))	GGUGAAGUUG-UUUUAUGUGAUUC&AUUUCAUAUGAAGUCGACUUCACC	0	0	NA	NA	NA	1	39.6024	4	0.812431	Output/R0h/cleaveLand_result/t_plot/PC-3p-117669_63_XM_021131035.1_1614_TPlot.pdf	0	39.6024	-Inf	down	3.1118e-10	6.0515e-10	yes	GO:0044464(cell part);GO:0016407(acetyltransferase activity);GO:0031974(membrane-enclosed lumen);GO:0044444(cytoplasmic part);GO:0044429(mitochondrial part);GO:0009987(cellular process);GO:0005759(mitochondrial matrix);GO:0044237(cellular metabolic process);GO:0044281(small molecule metabolic process);GO:0016747(transferase activity, transferring acyl groups other than amino-acyl groups);GO:00197…	ko01110(Biosynthesis of secondary metabolites);ko00010(Glycolysis / Gluconeogenesis);ko01200(Carbon metabolism);ko01100(Metabolic pathways);ko00020(Citrate cycle (TCA cycle));ko00620(Pyruvate metabolism)
PC-3p-117903_63	XM_016115252.2	772	795	786	-31.1	-24.1	0.77492	8.5	3-15,793-781;18-24,778-772	1-2,795-794[UP5];16-17,780-779[SIL]	(((((((..(((((((((((((..&..)))))))))))))..)))))))	GGUGUUCCUGUUGUUUUGGUCGAG&AACGAUUAAAAUAAUUAGAACACC	1	32.4181	4	0.0877918	Output/R24h/cleaveLand_result/t_plot/PC-3p-117903_63_XM_016115252.2_786_TPlot.pdf	0	0	NA	NA	NA	32.4181	0	Inf	up	1.2429e-08	1.41251e-08	yes	GO:1901265(nucleoside phosphate binding);GO:0098588(bounding membrane of organelle);GO:0005488(binding);GO:0043227(membrane-bounded organelle);GO:0022857(transmembrane transporter activity);GO:0044446(intracellular organelle part);GO:0009507(chloroplast);GO:0071702(organic substance transport);GO:0044422(organelle part);GO:0097367(carbohydrate derivative binding);GO:0005515(protein binding);GO:00…	NA
PC-3p-118336_63	XM_016111193.2	12249	12274	12265	-43	-31.7	0.737209	9.5	4-19,12271-12256;20-24,12253-12249	1-3,12274-12272[UP5];x-x,12255-12254[BULt]	(((((..((((((((((((((((...&...))))))))))))))))--)))))	GCUCAGUGGUGCAGUUGAUUUGACAU&AAAUCAAGUCGACUGCACC--UGAGU	2	64.8361	2	0.133934	Output/R24h/cleaveLand_result/t_plot/PC-3p-118336_63_XM_016111193.2_12265_TPlot.pdf	5	198.012	2	0.100146	Output/R0h/cleaveLand_result/t_plot/PC-3p-118336_63_XM_016111193.2_12265_TPlot.pdf	64.8361	198.012	-1.61072	down	2.1237e-16	1.43113e-15	yes	GO:0022618(ribonucleoprotein complex assembly);GO:0005524(ATP binding);GO:0005488(binding);GO:0022607(cellular component assembly);GO:0032559(adenyl ribonucleotide binding);GO:0016887(ATPase activity);GO:0005634(nucleus);GO:0032553(ribonucleotide binding);GO:0035639(purine ribonucleoside triphosphate binding);GO:0044085(cellular component biogenesis);GO:0036094(small molecule binding);GO:0071826(…	ko03008(Ribosome biogenesis in eukaryotes)
PC-3p-118336_63	XM_016113770.2	1641	1664	1654	-43	-29.2	0.67907	5.5	1-6,1664-1659;7-18,1657-1646;20-24,1645-1641	x-x,1658-1658[BULt];19-19,x-x[BULq]	(((((-((((((((((((.((((((&))))))-)))))))))))).)))))	GCUCA-GUGCAGUUGAUUCUGAUUU&AAAUCA-AGUCGACUGCACCUGAGU	1	32.4181	4	0.591759	Output/R24h/cleaveLand_result/t_plot/PC-3p-118336_63_XM_016113770.2_1654_TPlot.pdf	0	0	NA	NA	NA	32.4181	0	Inf	up	1.2429e-08	1.41251e-08	yes	GO:0070011(peptidase activity, acting on L-amino acid peptides);GO:0008233(peptidase activity);GO:1901564(organonitrogen compound metabolic process);GO:0044238(primary metabolic process);GO:0019538(protein metabolic process);GO:0003824(catalytic activity);GO:0006807(nitrogen compound metabolic process);GO:0016021(integral component of membrane);GO:0016787(hydrolase activity);GO:0004180(carboxypep…	NA
PC-3p-119396_62	BGI_novel_T011434	421	441	433	-37.9	-24.7	0.651715	6	2-6,440-436;8-11,435-432;14-24,431-421	1-1,441-441[UP5];7-7,x-x[BULq];12-13,x-x[BULq]	(((((((((((--((((-(((((.&.))))).))))..)))))))))))	AUUGGUUCAGU--GGUU-GGAUUC&AAAUCCGAACCAAACUGAACCAAU	2	64.8361	2	0.738039	Output/R24h/cleaveLand_result/t_plot/PC-3p-119396_62_BGI_novel_T011434_433_TPlot.pdf	1	39.6024	4	0.961429	Output/R0h/cleaveLand_result/t_plot/PC-3p-119396_62_BGI_novel_T011434_433_TPlot.pdf	64.8361	39.6024	0.71121	up	0.01354	0.0144021	yes	GO:0003824(catalytic activity);GO:0016788(hydrolase activity, acting on ester bonds);GO:0016787(hydrolase activity);GO:0043167(ion binding);GO:0004722(protein serine/threonine phosphatase activity);GO:0005488(binding);GO:0004721(phosphoprotein phosphatase activity);GO:0016791(phosphatase activity);GO:0042578(phosphoric ester hydrolase activity);GO:0043169(cation binding);GO:0046872(metal ion bind…	NA
PC-3p-119396_62	XM_016077837.2	472	495	485	-37.9	-27	0.712401	7	2-8,494-488;10-18,485-477;20-24,476-472	1-1,495-495[UP5];9-9,487-486[AILt];19-19,x-x[BULq]	(((((-(((((((((..(((((((.&.)))))))-.))))))))).)))))	AUUGG-UCAGUUUGGAGUCGGGUUC&AAAUCCGA-ACCAAACUGAACCAAU	2	64.8361	3	0.0855263	Output/R24h/cleaveLand_result/t_plot/PC-3p-119396_62_XM_016077837.2_485_TPlot.pdf	1	39.6024	4	0.554793	Output/R0h/cleaveLand_result/t_plot/PC-3p-119396_62_XM_016077837.2_485_TPlot.pdf	64.8361	39.6024	0.71121	up	0.01354	0.0144021	yes	GO:0036094(small molecule binding);GO:0005515(protein binding);GO:0005488(binding);GO:0006457(protein folding);GO:0032553(ribonucleotide binding);GO:0043168(anion binding);GO:0032559(adenyl ribonucleotide binding);GO:0006950(response to stress);GO:0043167(ion binding);GO:0000166(nucleotide binding);GO:0009987(cellular process);GO:0017076(purine nucleotide binding);GO:0097159(organic cyclic compou…	ko04141(Protein processing in endoplasmic reticulum);ko04626(Plant-pathogen interaction)
PC-3p-119396_62	XM_016079227.2	247	271	262	-37.9	-25	0.659631	10.5	4-6,268-266;8-16,264-256;18-23,253-248	1-3,271-269[UP5];7-7,265-265[SIL];17-17,255-254[AILt];24-24,247-247[UP3]	.((((((..(((((((((.(((...&...))).)))))))))-.)))))).	UUUGGUUGUGGUUUGGUUGGGAGAA&AAAUCCGAACCAAACU-GAACCAAU	2	64.8361	3	0.276086	Output/R24h/cleaveLand_result/t_plot/PC-3p-119396_62_XM_016079227.2_262_TPlot.pdf	1	39.6024	4	0.946293	Output/R0h/cleaveLand_result/t_plot/PC-3p-119396_62_XM_016079227.2_262_TPlot.pdf	64.8361	39.6024	0.71121	up	0.01354	0.0144021	yes	GO:0005623(cell);GO:0065007(biological regulation);GO:0050789(regulation of biological process);GO:0009987(cellular process);GO:0065008(regulation of biological quality);GO:0050794(regulation of cellular process);GO:0042592(homeostatic process);GO:0019725(cellular homeostasis);GO:0045454(cell redox homeostasis)	NA
PC-3p-119396_62	XM_016080366.2	2374	2396	2387	-37.9	-28.5	0.751979	7	3-12,2394-2385;15-16,2383-2382;18-24,2380-2374	1-2,2396-2395[UP5];13-14,2384-2384[AILq];17-17,2381-2381[SIL]	(((((((.((.-((((((((((..&..))))))))))..)).)))))))	GUUGGUUGGGG-UGGUUCGGAUGG&AAAUCCGAACCAAACUGAACCAAU	1	32.4181	4	0.30757	Output/R24h/cleaveLand_result/t_plot/PC-3p-119396_62_XM_016080366.2_2387_TPlot.pdf	0	0	NA	NA	NA	32.4181	0	Inf	up	1.2429e-08	1.41251e-08	yes	GO:0003824(catalytic activity)	ko00052(Galactose metabolism)
PC-3p-119396_62	XM_016080625.2	1250	1273	1264	-37.9	-28.7	0.757256	10.5	4-11,1270-1263;14-22,1260-1252	1-3,1273-1271[UP5];12-13,1262-1261[SIL];23-24,1251-1250[UP3]	..(((((((((..((((((((...&...))))))))..)))))))))..	GAUGGUUCGGUGCGGUUCGGAAAA&AAAUCCGAACCAAACUGAACCAAU	0	0	NA	NA	NA	1	39.6024	4	0.241088	Output/R0h/cleaveLand_result/t_plot/PC-3p-119396_62_XM_016080625.2_1264_TPlot.pdf	0	39.6024	-Inf	down	3.1118e-10	6.0515e-10	yes	NA	NA
PC-3p-119396_62	XM_016083813.2	2220	2243	2234	-37.9	-26.4	0.69657	9	3-7,2241-2237;9-16,2235-2228;18-21,2226-2223	1-2,2243-2242[UP5];8-8,2236-2236[SIL];17-17,2227-2227[SIL];22-24,2222-2220[UP3]	...((((.((((((((.(((((..&..))))).)))))))).))))...	CGCGGUUGAGUUUGGUGCGGAUCA&AAAUCCGAACCAAACUGAACCAAU	0	0	NA	NA	NA	2	79.2048	2	0.27539	Output/R0h/cleaveLand_result/t_plot/PC-3p-119396_62_XM_016083813.2_2234_TPlot.pdf	0	79.2048	-Inf	down	5.5905e-19	3.88279e-18	yes	GO:0003824(catalytic activity);GO:0043170(macromolecule metabolic process);GO:0008233(peptidase activity);GO:0006807(nitrogen compound metabolic process);GO:0019538(protein metabolic process);GO:0016787(hydrolase activity);GO:0008152(metabolic process);GO:0004252(serine-type endopeptidase activity);GO:0071704(organic substance metabolic process);GO:0004175(endopeptidase activity);GO:0070011(pepti…	ko00520(Amino sugar and nucleotide sugar metabolism);ko01100(Metabolic pathways);ko04146(Peroxisome)
PC-3p-119396_62	XM_016103004.2	512	534	525	-37.9	-24.9	0.656992	12	6-13,529-522;15-22,521-514	1-5,534-530[UP5];14-14,x-x[BULq];23-24,513-512[UP3]	..((((((((-((((((((.....&.....)))))))).))))))))..	CAUGGUUCAG-UUGGUUCGUAGUU&AAAUCCGAACCAAACUGAACCAAU	3	97.2542	2	0.702072	Output/R24h/cleaveLand_result/t_plot/PC-3p-119396_62_XM_016103004.2_525_TPlot.pdf	0	0	NA	NA	NA	97.2542	0	Inf	up	6.0829e-23	7.372e-22	yes	NA	NA
PC-3p-119396_62	XM_016110937.2	1096	1120	1111	-37.9	-25.1	0.662269	10.5	3-12,1118-1109;13-17,1107-1103;19-21,1101-1099	1-2,1120-1119[UP5];x-x,1108-1108[BULt];18-18,1102-1102[SIL];22-24,1098-1096[UP3]	...(((.(((((.((((((((((..&..))))))))))-))))).)))...	AUAGGUCCGGUUCUGGUUCGGGUCG&AAAUCCGAACCA-AACUGAACCAAU	3	97.2542	2	0.658592	Output/R24h/cleaveLand_result/t_plot/PC-3p-119396_62_XM_016110937.2_1111_TPlot.pdf	0	0	NA	NA	NA	97.2542	0	Inf	up	6.0829e-23	7.372e-22	yes	GO:0005488(binding);GO:0046872(metal ion binding);GO:0043167(ion binding);GO:0043169(cation binding)	NA
PC-3p-119826_61	XM_016080561.2	1018	1040	1032	-43.2	-28.52	0.660185	12	1-3,1040-1038;8-11,1034-1031;14-24,1028-1018	4-7,1037-1035[AILq];12-13,1030-1029[SIL]	(((((((((((..((((...-(((&)))....))))..)))))))))))	CUCAGGUGCAGCAGAGUCCG-GUG&CACGUAAAUUCGACUGCACCUGAG	0	0	NA	NA	NA	1	39.6024	4	0.708355	Output/R0h/cleaveLand_result/t_plot/PC-3p-119826_61_XM_016080561.2_1032_TPlot.pdf	0	39.6024	-Inf	down	3.1118e-10	6.0515e-10	yes	GO:0043170(macromolecule metabolic process);GO:0010033(response to organic substance);GO:0071367(cellular response to brassinosteroid stimulus);GO:0009741(response to brassinosteroid);GO:0016311(dephosphorylation);GO:0071407(cellular response to organic cyclic compound);GO:1901564(organonitrogen compound metabolic process);GO:0006807(nitrogen compound metabolic process);GO:0043412(macromolecule m…	NA
PC-3p-121413_60	BGI_novel_T001059	711	730	721	-32.3	-24.8	0.767802	3.5	1-19,730-712	20-20,711-711[UP3]	.(((((((((((((((((((&))))))))))))))))))).	CAGUUUUCUUUGUGUGAAAA&UUUUCACACGGAGAAGACUA	2	64.8361	3	0.0260697	Output/R24h/cleaveLand_result/t_plot/PC-3p-121413_60_BGI_novel_T001059_721_TPlot.pdf	0	0	NA	NA	NA	64.8361	0	Inf	up	8.1306e-16	3.55976e-15	yes	GO:0006952(defense response);GO:0006950(response to stress);GO:0050896(response to stimulus);GO:0009607(response to biotic stimulus)	NA
PC-3p-121413_60	BGI_novel_T001064	596	615	606	-32.3	-24.8	0.767802	3.5	1-19,615-597	20-20,596-596[UP3]	.(((((((((((((((((((&))))))))))))))))))).	CAGUUUUCUUUGUGUGAAAA&UUUUCACACGGAGAAGACUA	0	0	NA	NA	NA	1	39.6024	4	0.167992	Output/R0h/cleaveLand_result/t_plot/PC-3p-121413_60_BGI_novel_T001064_606_TPlot.pdf	0	39.6024	-Inf	down	3.1118e-10	6.0515e-10	yes	GO:0006950(response to stress);GO:0009607(response to biotic stimulus);GO:0006952(defense response);GO:0050896(response to stimulus)	NA
PC-3p-121413_60	BGI_novel_T001065	596	615	606	-32.3	-24.8	0.767802	3.5	1-19,615-597	20-20,596-596[UP3]	.(((((((((((((((((((&))))))))))))))))))).	CAGUUUUCUUUGUGUGAAAA&UUUUCACACGGAGAAGACUA	0	0	NA	NA	NA	1	39.6024	4	0.268496	Output/R0h/cleaveLand_result/t_plot/PC-3p-121413_60_BGI_novel_T001065_606_TPlot.pdf	0	39.6024	-Inf	down	3.1118e-10	6.0515e-10	yes	GO:0050896(response to stimulus);GO:0009607(response to biotic stimulus);GO:0006952(defense response);GO:0006950(response to stress)	NA
PC-3p-121413_60	BGI_novel_T001066	603	622	613	-32.3	-24.8	0.767802	3.5	1-19,622-604	20-20,603-603[UP3]	.(((((((((((((((((((&))))))))))))))))))).	CAGUUUUCUUUGUGUGAAAA&UUUUCACACGGAGAAGACUA	0	0	NA	NA	NA	1	39.6024	4	0.152548	Output/R0h/cleaveLand_result/t_plot/PC-3p-121413_60_BGI_novel_T001066_613_TPlot.pdf	0	39.6024	-Inf	down	3.1118e-10	6.0515e-10	yes	GO:0050896(response to stimulus);GO:0009607(response to biotic stimulus);GO:0006952(defense response);GO:0006950(response to stress)	NA
PC-3p-121413_60	BGI_novel_T001067	603	622	613	-32.3	-24.8	0.767802	3.5	1-19,622-604	20-20,603-603[UP3]	.(((((((((((((((((((&))))))))))))))))))).	CAGUUUUCUUUGUGUGAAAA&UUUUCACACGGAGAAGACUA	1	32.4181	4	0.29148	Output/R24h/cleaveLand_result/t_plot/PC-3p-121413_60_BGI_novel_T001067_613_TPlot.pdf	0	0	NA	NA	NA	32.4181	0	Inf	up	1.2429e-08	1.41251e-08	yes	GO:0050896(response to stimulus);GO:0009607(response to biotic stimulus);GO:0006952(defense response);GO:0006950(response to stress)	NA
PC-3p-121413_60	BGI_novel_T003807	673	693	684	-32.3	-21.3	0.659443	5.5	1-7,693-687;9-16,685-678;17-20,676-673	8-8,686-686[SIL];x-x,677-677[BULt]	((((.((((((((.(((((((&))))))).))))))))-))))	UAGUACUUCUUCGAGUGAGAG&UUUUCACACGGAGAAG-ACUA	0	0	NA	NA	NA	1	39.6024	4	0.999646	Output/R0h/cleaveLand_result/t_plot/PC-3p-121413_60_BGI_novel_T003807_684_TPlot.pdf	0	39.6024	-Inf	down	3.1118e-10	6.0515e-10	yes	GO:0016818(hydrolase activity, acting on acid anhydrides, in phosphorus-containing anhydrides);GO:0043170(macromolecule metabolic process);GO:1901363(heterocyclic compound binding);GO:0044464(cell part);GO:0004386(helicase activity);GO:1901360(organic cyclic compound metabolic process);GO:0006807(nitrogen compound metabolic process);GO:0005622(intracellular);GO:0032555(purine ribonucleotide bindi…	NA
PC-3p-121413_60	BGI_novel_T003808	673	693	684	-32.3	-21.3	0.659443	5.5	1-7,693-687;9-16,685-678;17-20,676-673	8-8,686-686[SIL];x-x,677-677[BULt]	((((.((((((((.(((((((&))))))).))))))))-))))	UAGUACUUCUUCGAGUGAGAG&UUUUCACACGGAGAAG-ACUA	0	0	NA	NA	NA	1	39.6024	4	0.999439	Output/R0h/cleaveLand_result/t_plot/PC-3p-121413_60_BGI_novel_T003808_684_TPlot.pdf	0	39.6024	-Inf	down	3.1118e-10	6.0515e-10	yes	GO:0016818(hydrolase activity, acting on acid anhydrides, in phosphorus-containing anhydrides);GO:0043170(macromolecule metabolic process);GO:1901363(heterocyclic compound binding);GO:0044464(cell part);GO:0004386(helicase activity);GO:1901360(organic cyclic compound metabolic process);GO:0006807(nitrogen compound metabolic process);GO:0005622(intracellular);GO:0032555(purine ribonucleotide bindi…	NA
PC-3p-121413_60	BGI_novel_T006686	813	832	823	-32.3	-22.6	0.69969	8.5	4-14,829-819;16-18,817-815	1-3,832-830[UP5];15-15,818-818[SIL];19-20,814-813[UP3]	..(((.(((((((((((...&...))))))))))).)))..	CUGUUGUCUCCGUGUGAUCU&UUUUCACACGGAGAAGACUA	1	32.4181	4	0.962558	Output/R24h/cleaveLand_result/t_plot/PC-3p-121413_60_BGI_novel_T006686_823_TPlot.pdf	0	0	NA	NA	NA	32.4181	0	Inf	up	1.2429e-08	1.41251e-08	yes	GO:0006399(tRNA metabolic process);GO:0016891(endoribonuclease activity, producing 5'-phosphomonoesters);GO:0046483(heterocycle metabolic process);GO:0016787(hydrolase activity);GO:0071704(organic substance metabolic process);GO:0042780(tRNA 3'-end processing);GO:0090304(nucleic acid metabolic process);GO:0034414(tRNA 3'-trailer cleavage, endonucleolytic);GO:0016788(hydrolase activity, acting on …	ko03013(RNA transport)
PC-3p-121413_60	BGI_novel_T011181	867	890	877	-32.3	-22.8	0.705882	12	1-7,890-884;8-19,879-868	x-x,883-880[BULt];20-20,867-867[UP3]	.((((((((((((....(((((((&)))))))----)))))))))))).	GGGUCUUCUUCGUGAGGGUGAAGG&UUUUCAC----ACGGAGAAGACUA	1	32.4181	4	0.927108	Output/R24h/cleaveLand_result/t_plot/PC-3p-121413_60_BGI_novel_T011181_877_TPlot.pdf	0	0	NA	NA	NA	32.4181	0	Inf	up	1.2429e-08	1.41251e-08	yes	GO:0030554(adenyl nucleotide binding);GO:0043170(macromolecule metabolic process);GO:0036094(small molecule binding);GO:1901564(organonitrogen compound metabolic process);GO:0000166(nucleotide binding);GO:1901363(heterocyclic compound binding);GO:0032553(ribonucleotide binding);GO:0097367(carbohydrate derivative binding);GO:0035639(purine ribonucleoside triphosphate binding);GO:1901265(nucleoside…	ko01100(Metabolic pathways)
PC-3p-121413_60	XM_016076477.2	184	204	195	-32.3	-21.9	0.678019	8	2-12,203-193;13-15,191-189;17-18,187-186	1-1,204-204[UP5];x-x,192-192[BULt];16-16,188-188[SIL];19-20,185-184[UP3]	..((.(((.(((((((((((.&.)))))))))))-))).))..	UUGUGUUCUUCCGUGUGGAGC&UUUUCACACGGA-GAAGACUA	1	32.4181	4	0.99672	Output/R24h/cleaveLand_result/t_plot/PC-3p-121413_60_XM_016076477.2_195_TPlot.pdf	0	0	NA	NA	NA	32.4181	0	Inf	up	1.2429e-08	1.41251e-08	yes	NA	NA
PC-3p-121413_60	XM_016080261.2	1867	1886	1877	-32.3	-22.9	0.708978	10	5-13,1882-1874;16-19,1871-1868	1-4,1886-1883[UP5];14-15,1873-1872[SIL];20-20,1867-1867[UP3]	.((((..(((((((((....&....)))))))))..)))).	CAGUCGGCUCCGUGUGUCCU&UUUUCACACGGAGAAGACUA	2	64.8361	2	0.558404	Output/R24h/cleaveLand_result/t_plot/PC-3p-121413_60_XM_016080261.2_1877_TPlot.pdf	1	39.6024	4	0.862792	Output/R0h/cleaveLand_result/t_plot/PC-3p-121413_60_XM_016080261.2_1877_TPlot.pdf	64.8361	39.6024	0.71121	up	0.01354	0.0144021	yes	GO:0009987(cellular process);GO:0005623(cell);GO:1901265(nucleoside phosphate binding);GO:0016020(membrane);GO:0071944(cell periphery);GO:0016818(hydrolase activity, acting on acid anhydrides, in phosphorus-containing anhydrides);GO:0008568(microtubule-severing ATPase activity);GO:1901363(heterocyclic compound binding);GO:0016887(ATPase activity);GO:0032555(purine ribonucleotide binding);GO:00325…	ko04141(Protein processing in endoplasmic reticulum)
PC-3p-121413_60	XM_016081466.2	1219	1238	1229	-32.3	-22.3	0.690402	5	2-10,1237-1229;12-20,1227-1219	1-1,1238-1238[UP5];11-11,1228-1228[SIL]	(((((((((.(((((((((.&.))))))))).)))))))))	UGGUUUUCUACGUGUGGAAC&UUUUCACACGGAGAAGACUA	4	129.672	2	0.764375	Output/R24h/cleaveLand_result/t_plot/PC-3p-121413_60_XM_016081466.2_1229_TPlot.pdf	0	0	NA	NA	NA	129.672	0	Inf	up	4.813e-30	1.15989e-28	yes	GO:0004659(prenyltransferase activity);GO:0043227(membrane-bounded organelle);GO:0009507(chloroplast);GO:0005737(cytoplasm);GO:0043229(intracellular organelle);GO:0003824(catalytic activity);GO:0005623(cell);GO:0044424(intracellular part);GO:0044444(cytoplasmic part);GO:0016765(transferase activity, transferring alkyl or aryl (other than methyl) groups);GO:0009536(plastid);GO:0005622(intracellula…	ko01110(Biosynthesis of secondary metabolites);ko00130(Ubiquinone and other terpenoid-quinone biosynthesis);ko01100(Metabolic pathways)
PC-3p-121413_60	XM_016086460.1	1149	1170	1159	-32.3	-22	0.681115	8	2-6,1169-1165;7-8,1163-1162;9-19,1160-1150	1-1,1170-1170[UP5];x-x,1164-1164[BULt];x-x,1161-1161[BULt];20-20,1149-1149[UP3]	.(((((((((((.((.(((((.&.)))))-))-))))))))))).	GGGUUUUCUCCGAUGAUGAGAG&UUUUCA-CA-CGGAGAAGACUA	4	129.672	2	0.844602	Output/R24h/cleaveLand_result/t_plot/PC-3p-121413_60_XM_016086460.1_1159_TPlot.pdf	3	118.807	2	0.744936	Output/R0h/cleaveLand_result/t_plot/PC-3p-121413_60_XM_016086460.1_1159_TPlot.pdf	129.672	118.807	0.126248	up	0.49063	0.491656	yes	NA	NA
PC-3p-121413_60	XM_016095001.2	653	672	663	-32.3	-21.7	0.671827	12	6-18,667-655	1-5,672-668[UP5];19-20,654-653[UP3]	..(((((((((((((.....&.....)))))))))))))..	CUGUCUUCUCUGUGUUCCUC&UUUUCACACGGAGAAGACUA	1	32.4181	4	0.99928	Output/R24h/cleaveLand_result/t_plot/PC-3p-121413_60_XM_016095001.2_663_TPlot.pdf	1	39.6024	4	0.996952	Output/R0h/cleaveLand_result/t_plot/PC-3p-121413_60_XM_016095001.2_663_TPlot.pdf	32.4181	39.6024	-0.28879	down	0.39723	0.398704	yes	GO:0016020(membrane);GO:0031224(intrinsic component of membrane);GO:0016021(integral component of membrane);GO:0044425(membrane part)	NA
PC-3p-121413_60	XM_016096963.2	1334	1352	1344	-32.3	-21.5	0.665635	8	2-5,1351-1348;7-17,1347-1337	1-1,1352-1352[UP5];6-6,x-x[BULq];18-20,1336-1334[UP3]	...(((((((((((-((((.&.)))).)))))))))))...	UUCUCUUCUCCGUG-GGAGC&UUUUCACACGGAGAAGACUA	0	0	NA	NA	NA	1	39.6024	4	0.998951	Output/R0h/cleaveLand_result/t_plot/PC-3p-121413_60_XM_016096963.2_1344_TPlot.pdf	0	39.6024	-Inf	down	3.1118e-10	6.0515e-10	yes	GO:0016020(membrane);GO:0015075(ion transmembrane transporter activity);GO:0005623(cell);GO:0031224(intrinsic component of membrane);GO:0055085(transmembrane transport);GO:0016021(integral component of membrane);GO:0015112(nitrate transmembrane transporter activity);GO:0006811(ion transport);GO:0005886(plasma membrane);GO:0015706(nitrate transport);GO:0008509(anion transmembrane transporter activ…	ko00910(Nitrogen metabolism)
PC-3p-121413_60	XM_016097602.2	799	819	809	-32.3	-21.6	0.668731	9	2-6,818-814;7-9,812-810;11-18,808-801	1-1,819-819[UP5];x-x,813-813[BULt];10-10,809-809[SIL];19-20,800-799[UP3]	..((((((((.(((.(((((.&.)))))-))).))))))))..	GCGUCUUCUCGGUGCUGAGGU&UUUUCA-CACGGAGAAGACUA	0	0	NA	NA	NA	2	79.2048	2	0.851996	Output/R0h/cleaveLand_result/t_plot/PC-3p-121413_60_XM_016097602.2_809_TPlot.pdf	0	79.2048	-Inf	down	5.5905e-19	3.88279e-18	yes	GO:0044283(small molecule biosynthetic process);GO:0009308(amine metabolic process);GO:0046219(indolalkylamine biosynthetic process);GO:0046483(heterocycle metabolic process);GO:0016835(carbon-oxygen lyase activity);GO:0006568(tryptophan metabolic process);GO:0006725(cellular aromatic compound metabolic process);GO:0071704(organic substance metabolic process);GO:0046394(carboxylic acid biosynthet…	ko01100(Metabolic pathways);ko00260(Glycine, serine and threonine metabolism);ko01230(Biosynthesis of amino acids);ko01110(Biosynthesis of secondary metabolites);ko00400(Phenylalanine, tyrosine and tryptophan biosynthesis)
PC-3p-121413_60	XM_016101719.2	2431	2450	2441	-32.3	-24.5	0.758514	4.5	1-8,2450-2443;10-20,2441-2431	9-9,2442-2442[SIL]	(((((((((((.((((((((&)))))))).)))))))))))	UGGUUUUCUCCUUGUGAGAG&UUUUCACACGGAGAAGACUA	0	0	NA	NA	NA	1	39.6024	4	0.402473	Output/R0h/cleaveLand_result/t_plot/PC-3p-121413_60_XM_016101719.2_2441_TPlot.pdf	0	39.6024	-Inf	down	3.1118e-10	6.0515e-10	yes	GO:0003825(alpha,alpha-trehalose-phosphate synthase (UDP-forming) activity);GO:0016791(phosphatase activity);GO:0005984(disaccharide metabolic process);GO:0005975(carbohydrate metabolic process);GO:0034637(cellular carbohydrate biosynthetic process);GO:0016051(carbohydrate biosynthetic process);GO:0006796(phosphate-containing compound metabolic process);GO:0004805(trehalose-phosphatase activity);…	ko01100(Metabolic pathways);ko00500(Starch and sucrose metabolism)
PC-3p-121413_60	XM_016101722.2	2346	2365	2356	-32.3	-24.5	0.758514	4.5	1-8,2365-2358;10-20,2356-2346	9-9,2357-2357[SIL]	(((((((((((.((((((((&)))))))).)))))))))))	UGGUUUUCUCCUUGUGAGAG&UUUUCACACGGAGAAGACUA	1	32.4181	4	0.486334	Output/R24h/cleaveLand_result/t_plot/PC-3p-121413_60_XM_016101722.2_2356_TPlot.pdf	0	0	NA	NA	NA	32.4181	0	Inf	up	1.2429e-08	1.41251e-08	yes	GO:0003825(alpha,alpha-trehalose-phosphate synthase (UDP-forming) activity);GO:0016791(phosphatase activity);GO:0005984(disaccharide metabolic process);GO:0005975(carbohydrate metabolic process);GO:0034637(cellular carbohydrate biosynthetic process);GO:0016051(carbohydrate biosynthetic process);GO:0006796(phosphate-containing compound metabolic process);GO:0004805(trehalose-phosphatase activity);…	ko01100(Metabolic pathways);ko00500(Starch and sucrose metabolism)
PC-3p-121413_60	XM_016103125.2	552	572	562	-32.3	-21.1	0.653251	11	4-7,569-566;9-20,563-552	1-3,572-570[UP5];8-8,565-564[AILt]	((((((((((((..((((...&...))))-.))))))))))))	UGGUUUUCUCCGCCGUGGCCU&UUUUCAC-ACGGAGAAGACUA	1	32.4181	4	0.999979	Output/R24h/cleaveLand_result/t_plot/PC-3p-121413_60_XM_016103125.2_562_TPlot.pdf	0	0	NA	NA	NA	32.4181	0	Inf	up	1.2429e-08	1.41251e-08	yes	GO:0016020(membrane);GO:0016021(integral component of membrane);GO:0044425(membrane part);GO:0031224(intrinsic component of membrane)	NA
PC-3p-121413_60	XM_016109676.2	991	1009	1001	-32.3	-22.1	0.684211	7	1-9,1009-1001;12-19,999-992	10-11,1000-1000[AILq];20-20,991-991[UP3]	.((((((((.-(((((((((&)))))))))..)))))))).	AAGUCUUCUG-GUGUGGAGA&UUUUCACACGGAGAAGACUA	1	32.4181	4	0.994563	Output/R24h/cleaveLand_result/t_plot/PC-3p-121413_60_XM_016109676.2_1001_TPlot.pdf	0	0	NA	NA	NA	32.4181	0	Inf	up	1.2429e-08	1.41251e-08	yes	GO:0006399(tRNA metabolic process);GO:0016891(endoribonuclease activity, producing 5'-phosphomonoesters);GO:0046483(heterocycle metabolic process);GO:0016787(hydrolase activity);GO:0071704(organic substance metabolic process);GO:0042780(tRNA 3'-end processing);GO:0090304(nucleic acid metabolic process);GO:0034414(tRNA 3'-trailer cleavage, endonucleolytic);GO:0016788(hydrolase activity, acting on …	ko03013(RNA transport)
PC-3p-121413_60	XM_016117363.2	2811	2829	2821	-32.3	-21.8	0.674923	6.5	1-7,2829-2823;9-18,2822-2813	8-8,x-x[BULq];19-20,2812-2811[UP3]	..((((((((((-(((((((&))))))).))))))))))..	CUGUCUUUUCUG-GUGAGAA&UUUUCACACGGAGAAGACUA	0	0	NA	NA	NA	1	39.6024	4	0.995833	Output/R0h/cleaveLand_result/t_plot/PC-3p-121413_60_XM_016117363.2_2821_TPlot.pdf	0	39.6024	-Inf	down	3.1118e-10	6.0515e-10	yes	NA	ko04144(Endocytosis)
PC-3p-121413_60	XM_021125706.1	3673	3696	3683	-32.3	-21.78	0.674303	13.5	2-8,3695-3689;10-19,3683-3674	1-1,3696-3696[UP5];9-9,3688-3684[AILt];20-20,3673-3673[UP3]	.((((((((((.....(((((((.&.)))))))----.)))))))))).	GGGUCUUCUCCACCUAUGUGGAAU&UUUUCACA----CGGAGAAGACUA	1	32.4181	4	0.999029	Output/R24h/cleaveLand_result/t_plot/PC-3p-121413_60_XM_021125706.1_3683_TPlot.pdf	0	0	NA	NA	NA	32.4181	0	Inf	up	1.2429e-08	1.41251e-08	yes	GO:0018130(heterocycle biosynthetic process);GO:0016817(hydrolase activity, acting on acid anhydrides);GO:0044464(cell part);GO:0043227(membrane-bounded organelle);GO:0043226(organelle);GO:0032991(macromolecular complex);GO:0033554(cellular response to stress);GO:0097367(carbohydrate derivative binding);GO:0044260(cellular macromolecule metabolic process);GO:0071840(cellular component organizatio…	NA
PC-3p-121413_60	XM_021140877.1	1411	1430	1421	-32.3	-23.7	0.733746	6	2-17,1429-1414	1-1,1430-1430[UP5];18-20,1413-1411[UP3]	...((((((((((((((((.&.))))))))))))))))...	UGAUCUUCUUCGUGUGAAGU&UUUUCACACGGAGAAGACUA	0	0	NA	NA	NA	1	39.6024	4	0.655856	Output/R0h/cleaveLand_result/t_plot/PC-3p-121413_60_XM_021140877.1_1421_TPlot.pdf	0	39.6024	-Inf	down	3.1118e-10	6.0515e-10	yes	GO:0008276(protein methyltransferase activity);GO:0016278(lysine N-methyltransferase activity);GO:0018026(peptidyl-lysine monomethylation);GO:0009987(cellular process);GO:1901564(organonitrogen compound metabolic process);GO:0006464(cellular protein modification process);GO:0044238(primary metabolic process);GO:0036211(protein modification process);GO:0043170(macromolecule metabolic process);GO:0…	ko00310(Lysine degradation)
PC-3p-122043_60	XM_016082554.2	1567	1590	1581	-37.3	-26.4	0.707775	8.5	1-9,1590-1582;11-18,1580-1573;20-23,1571-1568	10-10,1581-1581[SIL];19-19,1572-1572[SIL];24-24,1567-1567[UP3]	.((((.((((((((.(((((((((&))))))))).)))))))).)))).	UUGUGGGUGCGUUCGGGUUCUUGU&AUAGGAACUGGAACGUACAUAUAU	1	32.4181	4	0.338663	Output/R24h/cleaveLand_result/t_plot/PC-3p-122043_60_XM_016082554.2_1581_TPlot.pdf	0	0	NA	NA	NA	32.4181	0	Inf	up	1.2429e-08	1.41251e-08	yes	GO:0005215(transporter activity);GO:0022857(transmembrane transporter activity);GO:0015291(secondary active transmembrane transporter activity);GO:0006811(ion transport);GO:0006817(phosphate ion transport);GO:0051234(establishment of localization);GO:0031224(intrinsic component of membrane);GO:0055085(transmembrane transport);GO:0016020(membrane);GO:0015698(inorganic anion transport);GO:0022804(a…	NA
PC-3p-122748_59	XM_016085420.2	287	311	302	-43.4	-28.42	0.654839	10	3-11,309-301;15-24,296-287	1-2,311-310[UP5];12-14,300-297[AILt]	((((((((((....(((((((((..&..)))))))))-...))))))))))	GGGAACUCAGUACUCAGUGGACUCU&AAAGUCCACUG-CACCUGAGUUUCU	0	0	NA	NA	NA	2	79.2048	3	0.25528	Output/R0h/cleaveLand_result/t_plot/PC-3p-122748_59_XM_016085420.2_302_TPlot.pdf	0	79.2048	-Inf	down	5.5905e-19	3.88279e-18	yes	GO:0016791(phosphatase activity);GO:0006793(phosphorus metabolic process);GO:0042578(phosphoric ester hydrolase activity);GO:0009987(cellular process);GO:0006796(phosphate-containing compound metabolic process);GO:0016311(dephosphorylation);GO:0003993(acid phosphatase activity);GO:0016787(hydrolase activity);GO:0008152(metabolic process);GO:0016788(hydrolase activity, acting on ester bonds);GO:00…	ko03010(Ribosome);ko04016(MAPK signaling pathway - plant)
PC-3p-122748_59	XM_016093321.2	472	495	485	-43.4	-29.5	0.679724	6	2-6,494-490;7-12,488-483;14-16,482-480;18-24,478-472	1-1,495-495[UP5];x-x,489-489[BULt];13-13,x-x[BULq];17-17,479-479[SIL]	(((((((.(((-((((((.(((((.&.)))))-)))))).))).)))))))	AGAAACUGAGG-GCAGUGAGAUUUG&AAAGUC-CACUGCACCUGAGUUUCU	0	0	NA	NA	NA	1	39.6024	4	0.893939	Output/R0h/cleaveLand_result/t_plot/PC-3p-122748_59_XM_016093321.2_485_TPlot.pdf	0	39.6024	-Inf	down	3.1118e-10	6.0515e-10	yes	GO:0030554(adenyl nucleotide binding);GO:0035639(purine ribonucleoside triphosphate binding);GO:0032559(adenyl ribonucleotide binding);GO:1901363(heterocyclic compound binding);GO:0005524(ATP binding);GO:0017076(purine nucleotide binding);GO:1901265(nucleoside phosphate binding);GO:0032555(purine ribonucleotide binding);GO:0043168(anion binding);GO:0036094(small molecule binding);GO:0005488(bindi…	ko03420(Nucleotide excision repair)
PC-3p-122748_59	XM_016093396.2	1388	1413	1404	-43.4	-29	0.668203	10	5-13,1409-1401;14-19,1399-1394;20-24,1392-1388	1-4,1413-1410[UP5];x-x,1400-1400[BULt];x-x,1393-1393[BULt]	(((((.((((((.(((((((((....&....)))))))))-))))))-)))))	AGAGAGUUCAGGCUGCAGUGGAAGAA&AAAGUCCACUGCA-CCUGAG-UUUCU	0	0	NA	NA	NA	1	39.6024	4	0.94112	Output/R0h/cleaveLand_result/t_plot/PC-3p-122748_59_XM_016093396.2_1404_TPlot.pdf	0	39.6024	-Inf	down	3.1118e-10	6.0515e-10	yes	NA	ko03013(RNA transport)
PC-3p-122748_59	XM_016115598.2	465	489	479	-43.4	-30.6	0.705069	12	4-9,486-481;11-16,478-473;18-24,471-465	1-3,489-487[UP5];10-10,480-479[AILt];17-17,472-472[SIL]	(((((((.((((((..((((((...&...))))))-.)))))).)))))))	AGGAACUGGGGUGUUCGUGGACAGA&AAAGUCCAC-UGCACCUGAGUUUCU	1	32.4181	4	0.864467	Output/R24h/cleaveLand_result/t_plot/PC-3p-122748_59_XM_016115598.2_479_TPlot.pdf	0	0	NA	NA	NA	32.4181	0	Inf	up	1.2429e-08	1.41251e-08	yes	GO:0048037(cofactor binding);GO:0016903(oxidoreductase activity, acting on the aldehyde or oxo group of donors);GO:0005996(monosaccharide metabolic process);GO:0051287(NAD binding);GO:0016491(oxidoreductase activity);GO:0050662(coenzyme binding);GO:0005488(binding);GO:1901265(nucleoside phosphate binding);GO:1901363(heterocyclic compound binding);GO:0006006(glucose metabolic process);GO:0071704(o…	ko01100(Metabolic pathways);ko00710(Carbon fixation in photosynthetic organisms);ko01200(Carbon metabolism)
PC-3p-122748_59	XM_016117041.2	886	917	908	-43.4	-29.1	0.670507	16.5	4-16,914-902;18-18,900-900;19-23,891-887	1-3,917-915[UP5];17-17,901-901[SIL];x-x,899-892[BULt];24-24,886-886[UP3]	.(((((........(.(((((((((((((...&...))))))))))))).)--------))))).	CGGAGCAGCACGUGUGGGGUGCAGUGGACGCA&AAAGUCCACUGCACCUGA--------GUUUCU	1	32.4181	4	0.965845	Output/R24h/cleaveLand_result/t_plot/PC-3p-122748_59_XM_016117041.2_908_TPlot.pdf	0	0	NA	NA	NA	32.4181	0	Inf	up	1.2429e-08	1.41251e-08	yes	NA	ko04120(Ubiquitin mediated proteolysis);ko01100(Metabolic pathways);ko00040(Pentose and glucuronate interconversions)
PC-3p-122748_59	XM_021131017.1	1561	1587	1576	-43.4	-29	0.668203	11.5	3-3,1585-1585;5-8,1583-1580;9-13,1577-1573;14-23,1571-1562	1-2,1587-1586[UP5];4-4,1584-1584[SIL];x-x,1579-1578[BULt];x-x,1572-1572[BULt];24-24,1561-1561[UP3]	.((((((((((.(((((..((((.(..&..).))))--)))))-)))))))))).	UGAAGCUCAGGAUGCAGCAUGGAGUCC&AAAGUCCA--CUGCA-CCUGAGUUUCU	0	0	NA	NA	NA	1	39.6024	4	0.945296	Output/R0h/cleaveLand_result/t_plot/PC-3p-122748_59_XM_021131017.1_1576_TPlot.pdf	0	39.6024	-Inf	down	3.1118e-10	6.0515e-10	yes	GO:0044260(cellular macromolecule metabolic process);GO:0006468(protein phosphorylation);GO:0051716(cellular response to stimulus);GO:0006796(phosphate-containing compound metabolic process);GO:0006464(cellular protein modification process);GO:0016310(phosphorylation);GO:0007154(cell communication);GO:0035639(purine ribonucleoside triphosphate binding);GO:0016772(transferase activity, transferrin…	NA
PC-3p-122748_59	XM_021139634.1	1076	1109	1100	-43.4	-30.4	0.700461	19	2-10,1108-1100;11-15,1092-1088;16-24,1084-1076	1-1,1109-1109[UP5];x-x,1099-1093[BULt];x-x,1087-1085[BULt]	(((((((((...(((((.......(((((((((.&.)))))))))-------)))))---)))))))))	GGGAACUCAAAUGGUGCUGUAAAUAGUGGACUUG&AAAGUCCACU-------GCACC---UGAGUUUCU	1	32.4181	4	0.889781	Output/R24h/cleaveLand_result/t_plot/PC-3p-122748_59_XM_021139634.1_1100_TPlot.pdf	0	0	NA	NA	NA	32.4181	0	Inf	up	1.2429e-08	1.41251e-08	yes	GO:1901564(organonitrogen compound metabolic process);GO:0044260(cellular macromolecule metabolic process);GO:0043170(macromolecule metabolic process);GO:0044238(primary metabolic process);GO:0003824(catalytic activity);GO:0071840(cellular component organization or biogenesis);GO:0019538(protein metabolic process);GO:0006355(regulation of transcription, DNA-templated);GO:0043231(intracellular mem…	NA
PC-3p-122855_59	BGI_novel_T010542	1077	1100	1091	-35.8	-25.1	0.701117	14	7-13,1094-1088;16-23,1085-1078	1-6,1100-1095[UP5];14-15,1087-1086[SIL];24-24,1077-1077[UP3]	.((((((((..(((((((......&......)))))))..)))))))).	CACAAAUCGGAUGGUCCGAAUUGA&AUAAAACGGACCAUACGAUUUGUA	0	0	NA	NA	NA	1	39.6024	4	0.281826	Output/R0h/cleaveLand_result/t_plot/PC-3p-122855_59_BGI_novel_T010542_1091_TPlot.pdf	0	39.6024	-Inf	down	3.1118e-10	6.0515e-10	yes	GO:0016020(membrane);GO:0019867(outer membrane)	NA
PC-3p-122855_59	XM_016079371.2	1780	1803	1794	-35.8	-25.6	0.715084	16.5	8-23,1796-1781	1-7,1803-1797[UP5];24-24,1780-1780[UP3]	.((((((((((((((((.......&.......)))))))))))))))).	AGCAGGUUGUGUGGUCCAACAGGU&AUAAAACGGACCAUACGAUUUGUA	0	0	NA	NA	NA	1	39.6024	4	0.104477	Output/R0h/cleaveLand_result/t_plot/PC-3p-122855_59_XM_016079371.2_1794_TPlot.pdf	0	39.6024	-Inf	down	3.1118e-10	6.0515e-10	yes	GO:0004683(calmodulin-dependent protein kinase activity);GO:0005516(calmodulin binding);GO:0046777(protein autophosphorylation);GO:0071229(cellular response to acid chemical);GO:0044238(primary metabolic process);GO:0043231(intracellular membrane-bounded organelle);GO:0004674(protein serine/threonine kinase activity);GO:0001101(response to acid chemical);GO:0065007(biological regulation);GO:00442…	ko04626(Plant-pathogen interaction)
PC-3p-122855_59	XM_016103523.2	682	705	696	-35.8	-25.1	0.701117	5.5	1-21,705-685	22-24,684-682[UP3]	...(((((((((((((((((((((&)))))))))))))))))))))...	AGAAAAUUGUAUGGUUUGUUUUAU&AUAAAACGGACCAUACGAUUUGUA	0	0	NA	NA	NA	1	39.6024	4	0.332762	Output/R0h/cleaveLand_result/t_plot/PC-3p-122855_59_XM_016103523.2_696_TPlot.pdf	0	39.6024	-Inf	down	3.1118e-10	6.0515e-10	yes	NA	NA
PC-3p-122855_59	XM_021137877.1	1277	1301	1292	-35.8	-24	0.670391	12	5-12,1297-1290;13-21,1288-1280	1-4,1301-1298[UP5];x-x,1289-1289[BULt];22-24,1279-1277[UP3]	...(((((((((.((((((((....&....))))))))-)))))))))...	UGAAAAUCGUAUCGGUCCGUUCAAG&AUAAAACGGACC-AUACGAUUUGUA	1	32.4181	4	0.531429	Output/R24h/cleaveLand_result/t_plot/PC-3p-122855_59_XM_021137877.1_1292_TPlot.pdf	0	0	NA	NA	NA	32.4181	0	Inf	up	1.2429e-08	1.41251e-08	yes	GO:0044281(small molecule metabolic process);GO:0016491(oxidoreductase activity);GO:0044464(cell part);GO:0044424(intracellular part);GO:0036094(small molecule binding);GO:0065007(biological regulation);GO:0048037(cofactor binding);GO:1901575(organic substance catabolic process);GO:0030258(lipid modification);GO:0052890(oxidoreductase activity, acting on the CH-CH group of donors, with a flavin a…	ko01212(Fatty acid metabolism);ko00592(alpha-Linolenic acid metabolism);ko01100(Metabolic pathways);ko01110(Biosynthesis of secondary metabolites);ko01040(Biosynthesis of unsaturated fatty acids);ko04146(Peroxisome);ko00071(Fatty acid degradation)
PC-3p-12333_982	BGI_novel_T000429	1532	1555	1546	-42.7	-29.6	0.693208	12	4-23,1552-1533	1-3,1555-1553[UP5];24-24,1532-1532[UP3]	.((((((((((((((((((((...&...)))))))))))))))))))).	GCAGCAGCUGGUGGAGUUCAGGCU&UUGUUGGGCUUUAUCAGUUGCUGG	2	64.8361	0	0.0401918	Output/R24h/cleaveLand_result/t_plot/PC-3p-12333_982_BGI_novel_T000429_1546_TPlot.pdf	0	0	NA	NA	NA	64.8361	0	Inf	up	8.1306e-16	3.55976e-15	yes	NA	ko00480(Glutathione metabolism);ko01100(Metabolic pathways);ko00270(Cysteine and methionine metabolism);ko00190(Oxidative phosphorylation)
PC-3p-12333_982	BGI_novel_T000945	1915	1938	1929	-42.7	-33.3	0.779859	11	4-24,1935-1915	1-3,1938-1936[UP5]	(((((((((((((((((((((...&...)))))))))))))))))))))	CUGGCAGCUGGUGGGGCCCAGAAU&UUGUUGGGCUUUAUCAGUUGCUGG	1	32.4181	4	0.0665943	Output/R24h/cleaveLand_result/t_plot/PC-3p-12333_982_BGI_novel_T000945_1929_TPlot.pdf	0	0	NA	NA	NA	32.4181	0	Inf	up	1.2429e-08	1.41251e-08	yes	NA	NA
PC-3p-12333_982	BGI_novel_T001667	2201	2224	2215	-42.7	-28.3	0.662763	8	2-15,2223-2210;16-20,2208-2204;22-24,2203-2201	1-1,2224-2224[UP5];x-x,2209-2209[BULt];21-21,x-x[BULq]	(((-(((((.((((((((((((((.&.))))))))))))))-))))).)))	CCA-CAGCUCGGUGGGGUCCAACAU&UUGUUGGGCUUUAUC-AGUUGCUGG	1	32.4181	4	0.999968	Output/R24h/cleaveLand_result/t_plot/PC-3p-12333_982_BGI_novel_T001667_2215_TPlot.pdf	0	0	NA	NA	NA	32.4181	0	Inf	up	1.2429e-08	1.41251e-08	yes	GO:0016491(oxidoreductase activity);GO:0003824(catalytic activity);GO:0019748(secondary metabolic process);GO:0051213(dioxygenase activity);GO:0008152(metabolic process)	ko04144(Endocytosis);ko01100(Metabolic pathways);ko01230(Biosynthesis of amino acids);ko01110(Biosynthesis of secondary metabolites);ko00710(Carbon fixation in photosynthetic organisms);ko00520(Amino sugar and nucleotide sugar metabolism);ko00010(Glycolysis / Gluconeogenesis);ko01200(Carbon metabolism);ko00130(Ubiquinone and other terpenoid-quinone biosynthesis)
PC-3p-12333_982	BGI_novel_T002788	892	920	906	-42.7	-28.2	0.660422	15.5	2-7,919-914;8-19,908-897;21-24,895-892	1-1,920-920[UP5];x-x,913-909[BULt];20-20,896-896[SIL]	((((.((((((((((((.....((((((.&.))))))-----)))))))))))).))))	CCAGGAAUUGAUGAGGUUUGCUCCAACAC&UUGUUGG-----GCUUUAUCAGUUGCUGG	0	0	NA	NA	NA	1	39.6024	4	0.999859	Output/R0h/cleaveLand_result/t_plot/PC-3p-12333_982_BGI_novel_T002788_906_TPlot.pdf	0	39.6024	-Inf	down	3.1118e-10	6.0515e-10	yes	GO:0072655(establishment of protein localization to mitochondrion);GO:0031224(intrinsic component of membrane);GO:0070727(cellular macromolecule localization);GO:0032555(purine ribonucleotide binding);GO:0006886(intracellular protein transport);GO:0043226(organelle);GO:1901265(nucleoside phosphate binding);GO:0044429(mitochondrial part);GO:0015031(protein transport);GO:0044237(cellular metabolic …	NA
PC-3p-12333_982	BGI_novel_T009373	1027	1052	1043	-42.7	-27.8	0.651054	7	1-5,1052-1048;7-15,1046-1038;17-24,1034-1027	6-6,1047-1047[SIL];16-16,1037-1035[AILt]	((((((((...(((((((((.(((((&))))).)))))))))--.))))))))	CUAGCAACAAAGAUAAAGCUGAACAG&UUGUUGGGCUUUAUC--AGUUGCUGG	3	97.2542	2	0.985234	Output/R24h/cleaveLand_result/t_plot/PC-3p-12333_982_BGI_novel_T009373_1043_TPlot.pdf	0	0	NA	NA	NA	97.2542	0	Inf	up	6.0829e-23	7.372e-22	yes	NA	ko00071(Fatty acid degradation);ko01100(Metabolic pathways);ko04146(Peroxisome);ko01212(Fatty acid metabolism);ko00061(Fatty acid biosynthesis)
PC-3p-12333_982	BGI_novel_T010676	1292	1315	1306	-42.7	-28.3	0.662763	9.5	1-5,1315-1311;7-12,1309-1304;14-22,1302-1294;24-24,1292-1292	6-6,1310-1310[SIL];13-13,1303-1303[SIL];23-23,1293-1293[SIL]	(.(((((((((.((((((.(((((&))))).)))))).))))))))).)	CGGGCGGCUGAGGGAGUCGGACAA&UUGUUGGGCUUUAUCAGUUGCUGG	0	0	NA	NA	NA	1	39.6024	4	0.999721	Output/R0h/cleaveLand_result/t_plot/PC-3p-12333_982_BGI_novel_T010676_1306_TPlot.pdf	0	39.6024	-Inf	down	3.1118e-10	6.0515e-10	yes	GO:0016740(transferase activity);GO:0016758(transferase activity, transferring hexosyl groups);GO:0003824(catalytic activity);GO:0008194(UDP-glycosyltransferase activity);GO:0016757(transferase activity, transferring glycosyl groups);GO:0008375(acetylglucosaminyltransferase activity);GO:0016020(membrane)	NA
PC-3p-12333_982	BGI_novel_T011034	632	655	646	-42.7	-28.5	0.667447	13	3-5,653-651;7-23,649-633	1-2,655-654[UP5];6-6,650-650[SIL];24-24,632-632[UP3]	.(((((((((((((((((.(((..&..))).))))))))))))))))).	GCAGCAGCUGGUGGAGUUGGAUCC&UUGUUGGGCUUUAUCAGUUGCUGG	0	0	NA	NA	NA	1	39.6024	4	0.999373	Output/R0h/cleaveLand_result/t_plot/PC-3p-12333_982_BGI_novel_T011034_646_TPlot.pdf	0	39.6024	-Inf	down	3.1118e-10	6.0515e-10	yes	GO:0044464(cell part);GO:0005623(cell);GO:0003824(catalytic activity);GO:0006950(response to stress);GO:0016491(oxidoreductase activity);GO:0043167(ion binding);GO:0055114(oxidation-reduction process);GO:0006979(response to oxidative stress);GO:0046914(transition metal ion binding);GO:0005737(cytoplasm);GO:0033554(cellular response to stress);GO:0051716(cellular response to stimulus);GO:0070887(c…	NA
PC-3p-12333_982	BGI_novel_T012638	886	913	901	-42.7	-28.5	0.667447	12.5	2-6,912-908;7-15,904-896;16-23,894-887	1-1,913-913[UP5];x-x,907-905[BULt];x-x,895-895[BULt];24-24,886-886[UP3]	.((((((((.(((((((((...(((((.&.)))))---)))))))))-)))))))).	GCAGCAGCUCGAUAAGGCUGCUCAGCAG&UUGUUG---GGCUUUAUC-AGUUGCUGG	1	32.4181	4	0.999885	Output/R24h/cleaveLand_result/t_plot/PC-3p-12333_982_BGI_novel_T012638_901_TPlot.pdf	0	0	NA	NA	NA	32.4181	0	Inf	up	1.2429e-08	1.41251e-08	yes	NA	ko04075(Plant hormone signal transduction)
PC-3p-12333_982	XM_016081364.2	1688	1711	1702	-42.7	-28.4	0.665105	9	2-4,1710-1708;6-16,1706-1696;18-22,1694-1690	1-1,1711-1711[UP5];5-5,1707-1707[SIL];17-17,1695-1695[SIL];23-24,1689-1688[UP3]	..(((((.(((((((((((.(((.&.))).))))))))))).)))))..	UAAGCAAGUGAUGAAGCCUCGCAU&UUGUUGGGCUUUAUCAGUUGCUGG	1	32.4181	4	0.999934	Output/R24h/cleaveLand_result/t_plot/PC-3p-12333_982_XM_016081364.2_1702_TPlot.pdf	0	0	NA	NA	NA	32.4181	0	Inf	up	1.2429e-08	1.41251e-08	yes	GO:0044464(cell part);GO:0050896(response to stimulus);GO:0055044(symplast);GO:0030915(Smc5-Smc6 complex);GO:0005911(cell-cell junction);GO:0005694(chromosome);GO:0016043(cellular component organization);GO:0006725(cellular aromatic compound metabolic process);GO:0006996(organelle organization);GO:0006139(nucleobase-containing compound metabolic process);GO:0009987(cellular process);GO:0009506(pl…	NA
PC-3p-12333_982	XM_016081730.2	524	547	538	-42.7	-28.5	0.667447	13	3-5,545-543;7-23,541-525	1-2,547-546[UP5];6-6,542-542[SIL];24-24,524-524[UP3]	.(((((((((((((((((.(((..&..))).))))))))))))))))).	GCAGCAGCUGGUGGAGUUGGAUCC&UUGUUGGGCUUUAUCAGUUGCUGG	0	0	NA	NA	NA	1	39.6024	4	0.999189	Output/R0h/cleaveLand_result/t_plot/PC-3p-12333_982_XM_016081730.2_538_TPlot.pdf	0	39.6024	-Inf	down	3.1118e-10	6.0515e-10	yes	GO:0005737(cytoplasm);GO:0005829(cytosol);GO:0005623(cell);GO:0043167(ion binding);GO:0008152(metabolic process);GO:0008270(zinc ion binding);GO:0005488(binding);GO:0005622(intracellular);GO:0016491(oxidoreductase activity);GO:0003824(catalytic activity);GO:0044464(cell part);GO:0046914(transition metal ion binding);GO:0044444(cytoplasmic part);GO:0055114(oxidation-reduction process);GO:0044424(i…	NA
PC-3p-12333_982	XM_016082088.2	1530	1556	1547	-42.7	-28.7	0.672131	17	3-10,1554-1547;14-23,1540-1531	1-2,1556-1555[UP5];11-13,1546-1541[AILt];24-24,1530-1530[UP3]	.((((((((((......((((((((..&..))))))))---...)))))))))).	GUAGCAGCUGAGAACAUAGCCCGACUC&UUGUUGGGCU---UUAUCAGUUGCUGG	1	32.4181	4	0.999787	Output/R24h/cleaveLand_result/t_plot/PC-3p-12333_982_XM_016082088.2_1547_TPlot.pdf	0	0	NA	NA	NA	32.4181	0	Inf	up	1.2429e-08	1.41251e-08	yes	GO:0006082(organic acid metabolic process);GO:0071704(organic substance metabolic process);GO:0044237(cellular metabolic process);GO:0016054(organic acid catabolic process);GO:0006575(cellular modified amino acid metabolic process);GO:0044248(cellular catabolic process);GO:0044273(sulfur compound catabolic process);GO:0046395(carboxylic acid catabolic process);GO:0009987(cellular process);GO:0009…	ko00900(Terpenoid backbone biosynthesis)
PC-3p-12333_982	XM_016082582.2	568	591	582	-42.7	-28.8	0.674473	11	1-4,591-588;6-6,586-586;8-9,584-583;12-24,580-568	5-5,587-587[SIL];7-7,585-585[SIL];10-11,582-581[SIL]	(((((((((((((..((.(.((((&)))).).))..)))))))))))))	CCGGCGACUGGUACUGCGCCGCAG&UUGUUGGGCUUUAUCAGUUGCUGG	0	0	NA	NA	NA	1	39.6024	4	0.997966	Output/R0h/cleaveLand_result/t_plot/PC-3p-12333_982_XM_016082582.2_582_TPlot.pdf	0	39.6024	-Inf	down	3.1118e-10	6.0515e-10	yes	GO:0046914(transition metal ion binding);GO:0008270(zinc ion binding);GO:0043169(cation binding);GO:0043167(ion binding);GO:0005488(binding);GO:0046872(metal ion binding)	ko03022(Basal transcription factors)
PC-3p-12333_982	XM_016083797.2	438	464	455	-42.7	-30.3	0.709602	11.5	1-11,464-454;12-19,450-443;21-24,441-438	x-x,453-451[BULt];20-20,442-442[SIL]	((((.((((((((...(((((((((((&)))))))))))---)))))))).))))	CCAGGAGCUGGUGGACAGGUCCAACAG&UUGUUGGGCUU---UAUCAGUUGCUGG	1	32.4181	4	0.894731	Output/R24h/cleaveLand_result/t_plot/PC-3p-12333_982_XM_016083797.2_455_TPlot.pdf	0	0	NA	NA	NA	32.4181	0	Inf	up	1.2429e-08	1.41251e-08	yes	GO:0009719(response to endogenous stimulus);GO:0042221(response to chemical);GO:0009725(response to hormone);GO:0050896(response to stimulus);GO:0010033(response to organic substance);GO:0009733(response to auxin)	ko04075(Plant hormone signal transduction)
PC-3p-12333_982	XM_016084109.2	591	618	609	-42.7	-28.6	0.669789	11	3-17,616-602;18-24,597-591	1-2,618-617[UP5];x-x,601-598[BULt]	(((((((....(((((((((((((((..&..)))))))))))))))----)))))))	CCAGCAAUGCCCUGAUAAGGUUCAAUGG&UUGUUGGGCUUUAUCAG----UUGCUGG	3	97.2542	2	0.94234	Output/R24h/cleaveLand_result/t_plot/PC-3p-12333_982_XM_016084109.2_609_TPlot.pdf	0	0	NA	NA	NA	97.2542	0	Inf	up	6.0829e-23	7.372e-22	yes	GO:0003824(catalytic activity);GO:0016757(transferase activity, transferring glycosyl groups);GO:0016740(transferase activity)	ko00052(Galactose metabolism)
PC-3p-12333_982	XM_016085532.2	1966	1993	1981	-42.7	-29.1	0.681499	10	1-6,1993-1988;7-13,1984-1978;14-24,1976-1966	x-x,1987-1985[BULt];x-x,1977-1977[BULt]	(((((((((((.(((((((...((((((&))))))---)))))))-)))))))))))	UCAGCAACUGGUUGAAGCUGGUCAACAA&UUGUUG---GGCUUUA-UCAGUUGCUGG	0	0	NA	NA	NA	1	39.6024	4	0.993755	Output/R0h/cleaveLand_result/t_plot/PC-3p-12333_982_XM_016085532.2_1981_TPlot.pdf	0	39.6024	-Inf	down	3.1118e-10	6.0515e-10	yes	GO:0006810(transport);GO:0051234(establishment of localization);GO:0005623(cell);GO:0099568(cytoplasmic region);GO:0044464(cell part);GO:0043234(protein complex);GO:0032940(secretion by cell);GO:0044448(cell cortex part);GO:0099023(tethering complex);GO:0032991(macromolecular complex);GO:0009987(cellular process);GO:0044444(cytoplasmic part);GO:0016192(vesicle-mediated transport);GO:0005622(intra…	NA
PC-3p-12333_982	XM_016089734.2	285	309	300	-42.7	-28.1	0.65808	8.5	3-16,307-294;18-21,292-289;22-24,287-285	1-2,309-308[UP5];17-17,293-293[SIL];x-x,288-288[BULt]	(((.((((.((((((((((((((..&..)))))))))))))).))))-)))	CUAUGUAGGUGAUGAAGCCCAAUCC&UUGUUGGGCUUUAUCAGUUGC-UGG	0	0	NA	NA	NA	2	79.2048	3	0.504564	Output/R0h/cleaveLand_result/t_plot/PC-3p-12333_982_XM_016089734.2_300_TPlot.pdf	0	79.2048	-Inf	down	5.5905e-19	3.88279e-18	yes	GO:0005524(ATP binding);GO:0035639(purine ribonucleoside triphosphate binding);GO:0017076(purine nucleotide binding);GO:0032553(ribonucleotide binding);GO:0032555(purine ribonucleotide binding);GO:1901265(nucleoside phosphate binding);GO:0097367(carbohydrate derivative binding);GO:0097159(organic cyclic compound binding);GO:0005488(binding);GO:1901363(heterocyclic compound binding);GO:0043167(ion…	NA
PC-3p-12333_982	XM_016089735.2	333	357	348	-42.7	-28.1	0.65808	8.5	3-16,355-342;18-21,340-337;22-24,335-333	1-2,357-356[UP5];17-17,341-341[SIL];x-x,336-336[BULt]	(((.((((.((((((((((((((..&..)))))))))))))).))))-)))	CUAUGUAGGUGAUGAAGCCCAAUCC&UUGUUGGGCUUUAUCAGUUGC-UGG	0	0	NA	NA	NA	2	79.2048	2	0.939137	Output/R0h/cleaveLand_result/t_plot/PC-3p-12333_982_XM_016089735.2_348_TPlot.pdf	0	79.2048	-Inf	down	5.5905e-19	3.88279e-18	yes	GO:0017076(purine nucleotide binding);GO:0000166(nucleotide binding);GO:1901363(heterocyclic compound binding);GO:0032553(ribonucleotide binding);GO:0043167(ion binding);GO:0030554(adenyl nucleotide binding);GO:0043168(anion binding);GO:0005488(binding);GO:1901265(nucleoside phosphate binding);GO:0097367(carbohydrate derivative binding);GO:0032559(adenyl ribonucleotide binding);GO:0036094(small m…	NA
PC-3p-12333_982	XM_016089736.2	335	359	350	-42.7	-28.1	0.65808	8.5	3-16,357-344;18-21,342-339;22-24,337-335	1-2,359-358[UP5];17-17,343-343[SIL];x-x,338-338[BULt]	(((.((((.((((((((((((((..&..)))))))))))))).))))-)))	CUAUGUAGGUGAUGAAGCCCAAUCC&UUGUUGGGCUUUAUCAGUUGC-UGG	0	0	NA	NA	NA	1	39.6024	4	0.9999	Output/R0h/cleaveLand_result/t_plot/PC-3p-12333_982_XM_016089736.2_350_TPlot.pdf	0	39.6024	-Inf	down	3.1118e-10	6.0515e-10	yes	GO:0017076(purine nucleotide binding);GO:0000166(nucleotide binding);GO:1901363(heterocyclic compound binding);GO:0032553(ribonucleotide binding);GO:0043167(ion binding);GO:0030554(adenyl nucleotide binding);GO:0043168(anion binding);GO:0005488(binding);GO:1901265(nucleoside phosphate binding);GO:0097367(carbohydrate derivative binding);GO:0032559(adenyl ribonucleotide binding);GO:0036094(small m…	NA
PC-3p-12333_982	XM_016096512.2	2143	2166	2157	-42.7	-28.5	0.667447	6.5	2-3,2165-2164;5-14,2162-2153;17-24,2150-2143	1-1,2166-2166[UP5];4-4,2163-2163[SIL];15-16,2152-2151[SIL]	((((((((..((((((((((.((.&.)).))))))))))..))))))))	CCGGCAACCAAUAAAGCCUAUCAC&UUGUUGGGCUUUAUCAGUUGCUGG	1	32.4181	4	0.999888	Output/R24h/cleaveLand_result/t_plot/PC-3p-12333_982_XM_016096512.2_2157_TPlot.pdf	1	39.6024	4	0.999313	Output/R0h/cleaveLand_result/t_plot/PC-3p-12333_982_XM_016096512.2_2157_TPlot.pdf	32.4181	39.6024	-0.28879	down	0.39723	0.398704	yes	GO:0090304(nucleic acid metabolic process);GO:0044428(nuclear part);GO:0034660(ncRNA metabolic process);GO:0043414(macromolecule methylation);GO:1990904(ribonucleoprotein complex);GO:0031974(membrane-enclosed lumen);GO:0001510(RNA methylation);GO:0043412(macromolecule modification);GO:0046483(heterocycle metabolic process);GO:0016070(RNA metabolic process);GO:0016741(transferase activity, transfe…	NA
PC-3p-12333_982	XM_016097021.2	344	370	361	-42.7	-30.2	0.70726	10.5	2-5,369-366;7-18,364-353;19-23,349-345	1-1,370-370[UP5];6-6,365-365[SIL];x-x,352-350[BULt];24-24,344-344[UP3]	.(((((...((((((((((((.((((.&.)))).))))))))))))---))))).	ACAGCAUCAGCUGAUGAAGCUGAGCAU&UUGUUGGGCUUUAUCAGU---UGCUGG	1	32.4181	4	0.951794	Output/R24h/cleaveLand_result/t_plot/PC-3p-12333_982_XM_016097021.2_361_TPlot.pdf	0	0	NA	NA	NA	32.4181	0	Inf	up	1.2429e-08	1.41251e-08	yes	GO:0020037(heme binding);GO:0046906(tetrapyrrole binding);GO:0009055(electron transfer activity);GO:1901363(heterocyclic compound binding);GO:0005488(binding);GO:0097159(organic cyclic compound binding)	ko01100(Metabolic pathways);ko00190(Oxidative phosphorylation)
PC-3p-12333_982	XM_016102403.2	1638	1663	1655	-42.7	-29.7	0.69555	8.5	1-8,1663-1656;10-18,1655-1647;19-23,1643-1639	9-9,x-x[BULq];x-x,1646-1644[BULt];24-24,1638-1638[UP3]	.(((((...(((((((((-((((((((&)))))))).)))))))))---))))).	GCAGCAUAUGCUGAUGAA-CCCAGCAA&UUGUUGGGCUUUAUCAGU---UGCUGG	0	0	NA	NA	NA	1	39.6024	4	0.9635	Output/R0h/cleaveLand_result/t_plot/PC-3p-12333_982_XM_016102403.2_1655_TPlot.pdf	0	39.6024	-Inf	down	3.1118e-10	6.0515e-10	yes	GO:0030276(clathrin binding);GO:0030135(coated vesicle);GO:0005622(intracellular);GO:0070271(protein complex biogenesis);GO:0005737(cytoplasm);GO:0022607(cellular component assembly);GO:0006461(protein complex assembly);GO:0044464(cell part);GO:0005488(binding);GO:0043933(macromolecular complex subunit organization);GO:0044085(cellular component biogenesis);GO:0065003(macromolecular complex assem…	NA
PC-3p-12333_982	XM_016102607.2	810	833	824	-42.7	-28.8	0.674473	8	1-6,833-828;8-13,826-821;15-24,819-810	7-7,827-827[SIL];14-14,820-820[SIL]	((((((((((.((((((.((((((&)))))).)))))).))))))))))	CUGGCAGCUGUUGAGGCACAGCAG&UUGUUGGGCUUUAUCAGUUGCUGG	2	64.8361	2	0.925982	Output/R24h/cleaveLand_result/t_plot/PC-3p-12333_982_XM_016102607.2_824_TPlot.pdf	0	0	NA	NA	NA	64.8361	0	Inf	up	8.1306e-16	3.55976e-15	yes	NA	ko04144(Endocytosis)
PC-3p-12333_982	XM_016104994.2	601	623	615	-42.7	-29.5	0.690867	7.5	2-5,622-619;8-23,617-602	1-1,623-623[UP5];6-7,618-618[AILq];24-24,601-601[UP3]	.((((((((((((((((.-((((.&.))))..)))))))))))))))).	ACAGCAACUGGUAAAGCA-AGCAC&UUGUUGGGCUUUAUCAGUUGCUGG	0	0	NA	NA	NA	2	79.2048	2	0.75054	Output/R0h/cleaveLand_result/t_plot/PC-3p-12333_982_XM_016104994.2_615_TPlot.pdf	0	79.2048	-Inf	down	5.5905e-19	3.88279e-18	yes	GO:0005488(binding);GO:1901363(heterocyclic compound binding);GO:0003676(nucleic acid binding);GO:0097159(organic cyclic compound binding)	ko03013(RNA transport);ko03008(Ribosome biogenesis in eukaryotes)
PC-3p-12333_982	XM_016107701.2	597	622	613	-42.7	-27.8	0.651054	7	1-5,622-618;7-15,616-608;17-24,604-597	6-6,617-617[SIL];16-16,607-605[AILt]	((((((((...(((((((((.(((((&))))).)))))))))--.))))))))	CUAGCAACAAAGAUAAAGCUGAACAG&UUGUUGGGCUUUAUC--AGUUGCUGG	0	0	NA	NA	NA	2	79.2048	2	0.956142	Output/R0h/cleaveLand_result/t_plot/PC-3p-12333_982_XM_016107701.2_613_TPlot.pdf	0	79.2048	-Inf	down	5.5905e-19	3.88279e-18	yes	NA	NA
PC-3p-12333_982	XM_016111496.2	723	747	738	-42.7	-27.8	0.651054	7	2-2,746-746;4-14,744-734;17-18,731-730;19-24,728-723	1-1,747-747[UP5];3-3,745-745[SIL];15-16,733-732[SIL];x-x,729-729[BULt]	((((((.((..(((((((((((.(.&.).)))))))))))..))-))))))	CCAGCAGACCCAUGAAGCCCAAGAU&UUGUUGGGCUUUAUCAGU-UGCUGG	1	32.4181	4	0.999998	Output/R24h/cleaveLand_result/t_plot/PC-3p-12333_982_XM_016111496.2_738_TPlot.pdf	1	39.6024	4	0.999969	Output/R0h/cleaveLand_result/t_plot/PC-3p-12333_982_XM_016111496.2_738_TPlot.pdf	32.4181	39.6024	-0.28879	down	0.39723	0.398704	yes	GO:0016021(integral component of membrane);GO:0044425(membrane part);GO:0031224(intrinsic component of membrane);GO:0016020(membrane)	NA
PC-3p-12333_982	XM_016113065.2	1815	1837	1829	-42.7	-27.96	0.654801	12	2-9,1836-1829;17-24,1822-1815	1-1,1837-1837[UP5];10-16,1828-1823[AILq]	((((((((......-((((((((.&.)))))))).......))))))))	CCAGCAACAAUCUU-GCCCAGCAC&UUGUUGGGCUUUAUCAGUUGCUGG	2	64.8361	2	0.982159	Output/R24h/cleaveLand_result/t_plot/PC-3p-12333_982_XM_016113065.2_1829_TPlot.pdf	0	0	NA	NA	NA	64.8361	0	Inf	up	8.1306e-16	3.55976e-15	yes	NA	ko04136(Autophagy - other)
PC-3p-12333_982	XM_016117396.2	1293	1314	1307	-42.7	-30	0.702576	11.5	2-8,1313-1307;12-24,1305-1293	1-1,1314-1314[UP5];9-11,1306-1306[AILq]	(((((((((((((.--(((((((.&.)))))))...)))))))))))))	CCGGCGGCUGAUGC--CCCGGCAG&UUGUUGGGCUUUAUCAGUUGCUGG	2	64.8361	3	0.261226	Output/R24h/cleaveLand_result/t_plot/PC-3p-12333_982_XM_016117396.2_1307_TPlot.pdf	5	198.012	2	0.562868	Output/R0h/cleaveLand_result/t_plot/PC-3p-12333_982_XM_016117396.2_1307_TPlot.pdf	64.8361	198.012	-1.61072	down	2.1237e-16	1.43113e-15	yes	NA	NA
PC-3p-12333_982	XM_021129277.1	3634	3656	3647	-42.7	-29.9	0.700234	7.5	1-11,3656-3646;13-24,3645-3634	12-12,x-x[BULq]	((((((((((((-(((((((((((&))))))))))).))))))))))))	CCGGCAACUGGU-AGGCCUAGUAG&UUGUUGGGCUUUAUCAGUUGCUGG	0	0	NA	NA	NA	1	39.6024	4	0.942193	Output/R0h/cleaveLand_result/t_plot/PC-3p-12333_982_XM_021129277.1_3647_TPlot.pdf	0	39.6024	-Inf	down	3.1118e-10	6.0515e-10	yes	GO:0005623(cell);GO:0060255(regulation of macromolecule metabolic process);GO:0019219(regulation of nucleobase-containing compound metabolic process);GO:0044260(cellular macromolecule metabolic process);GO:0050789(regulation of biological process);GO:0019538(protein metabolic process);GO:0005737(cytoplasm);GO:2000112(regulation of cellular macromolecule biosynthetic process);GO:0044444(cytoplasmi…	ko00480(Glutathione metabolism);ko04016(MAPK signaling pathway - plant);ko04075(Plant hormone signal transduction)
PC-3p-12333_982	XM_021129278.1	2461	2483	2474	-42.7	-29.9	0.700234	7.5	1-11,2483-2473;13-24,2472-2461	12-12,x-x[BULq]	((((((((((((-(((((((((((&))))))))))).))))))))))))	CCGGCAACUGGU-AGGCCUAGUAG&UUGUUGGGCUUUAUCAGUUGCUGG	1	32.4181	4	0.974663	Output/R24h/cleaveLand_result/t_plot/PC-3p-12333_982_XM_021129278.1_2474_TPlot.pdf	0	0	NA	NA	NA	32.4181	0	Inf	up	1.2429e-08	1.41251e-08	yes	GO:0005623(cell);GO:0060255(regulation of macromolecule metabolic process);GO:0019219(regulation of nucleobase-containing compound metabolic process);GO:0044260(cellular macromolecule metabolic process);GO:0050789(regulation of biological process);GO:0019538(protein metabolic process);GO:0005737(cytoplasm);GO:2000112(regulation of cellular macromolecule biosynthetic process);GO:0044444(cytoplasmi…	ko00480(Glutathione metabolism);ko04016(MAPK signaling pathway - plant);ko04075(Plant hormone signal transduction)
PC-3p-12333_982	XM_021131518.1	1527	1551	1542	-42.7	-28.8	0.674473	9	3-16,1549-1536;18-24,1533-1527	1-2,1551-1550[UP5];17-17,1535-1534[AILt]	(((((((..((((((((((((((..&..))))))))))))))-.)))))))	UCAGCAGGAUGAUAAGGCUCAGCCU&UUGUUGGGCUUUAUCA-GUUGCUGG	0	0	NA	NA	NA	2	79.2048	2	0.850343	Output/R0h/cleaveLand_result/t_plot/PC-3p-12333_982_XM_021131518.1_1542_TPlot.pdf	0	79.2048	-Inf	down	5.5905e-19	3.88279e-18	yes	GO:0032549(ribonucleoside binding);GO:1901265(nucleoside phosphate binding);GO:0017111(nucleoside-triphosphatase activity);GO:0036094(small molecule binding);GO:0044249(cellular biosynthetic process);GO:0044238(primary metabolic process);GO:1901564(organonitrogen compound metabolic process);GO:0017076(purine nucleotide binding);GO:0003924(GTPase activity);GO:1901363(heterocyclic compound binding)…	ko03013(RNA transport)
PC-3p-12333_982	XM_021131735.1	592	619	610	-42.7	-28.6	0.669789	11	3-17,617-603;18-24,598-592	1-2,619-618[UP5];x-x,602-599[BULt]	(((((((....(((((((((((((((..&..)))))))))))))))----)))))))	CCAGCAAUGCCCUGAUAAGGUUCAAUGG&UUGUUGGGCUUUAUCAG----UUGCUGG	1	32.4181	4	0.999838	Output/R24h/cleaveLand_result/t_plot/PC-3p-12333_982_XM_021131735.1_610_TPlot.pdf	0	0	NA	NA	NA	32.4181	0	Inf	up	1.2429e-08	1.41251e-08	yes	GO:0003824(catalytic activity);GO:0016757(transferase activity, transferring glycosyl groups);GO:0016740(transferase activity)	ko00052(Galactose metabolism)
PC-3p-12333_982	XM_021135001.1	1342	1365	1356	-42.7	-28.3	0.662763	8	2-15,1364-1351;16-20,1349-1345;22-24,1344-1342	1-1,1365-1365[UP5];x-x,1350-1350[BULt];21-21,x-x[BULq]	(((-(((((.((((((((((((((.&.))))))))))))))-))))).)))	CCA-CAGCUCGGUGGGGUCCAACAU&UUGUUGGGCUUUAUC-AGUUGCUGG	1	32.4181	4	0.999959	Output/R24h/cleaveLand_result/t_plot/PC-3p-12333_982_XM_021135001.1_1356_TPlot.pdf	0	0	NA	NA	NA	32.4181	0	Inf	up	1.2429e-08	1.41251e-08	yes	GO:0016491(oxidoreductase activity);GO:0003824(catalytic activity);GO:0019748(secondary metabolic process);GO:0051213(dioxygenase activity);GO:0008152(metabolic process)	ko04144(Endocytosis);ko01100(Metabolic pathways);ko01230(Biosynthesis of amino acids);ko01110(Biosynthesis of secondary metabolites);ko00710(Carbon fixation in photosynthetic organisms);ko00520(Amino sugar and nucleotide sugar metabolism);ko00010(Glycolysis / Gluconeogenesis);ko01200(Carbon metabolism);ko00130(Ubiquinone and other terpenoid-quinone biosynthesis)
PC-3p-12333_982	XM_021139381.1	477	501	492	-42.7	-30.2	0.70726	8	1-10,501-492;12-16,490-486;18-22,484-480;23-24,478-477	11-11,491-491[SIL];17-17,485-485[SIL];x-x,479-479[BULt]	((.(((((.(((((.((((((((((&)))))))))).))))).)))))-))	CCAAGCAAGUGAUAUGGCUCAGCGA&UUGUUGGGCUUUAUCAGUUGCU-GG	0	0	NA	NA	NA	1	39.6024	4	0.887922	Output/R0h/cleaveLand_result/t_plot/PC-3p-12333_982_XM_021139381.1_492_TPlot.pdf	0	39.6024	-Inf	down	3.1118e-10	6.0515e-10	yes	GO:0034715(pICln-Sm protein complex);GO:0008152(metabolic process);GO:0090304(nucleic acid metabolic process);GO:1990234(transferase complex);GO:0022613(ribonucleoprotein complex biogenesis);GO:0006397(mRNA processing);GO:1901360(organic cyclic compound metabolic process);GO:0071826(ribonucleoprotein complex subunit organization);GO:0022607(cellular component assembly);GO:0016070(RNA metabolic pr…	ko03013(RNA transport)
PC-3p-123460_58	XM_016076439.2	706	720	711	-38.7	-25.5	0.658915	3.5	11-23,719-707	10-10,720-720[SIL];24-24,706-706[UP3]	.(((((((((((((.&.))))))))))))).	CGUCAGGCCCUCCGU&AAAUACAAAUCGGAG	0	0	NA	NA	NA	1	39.6024	4	0.78666	Output/R0h/cleaveLand_result/t_plot/PC-3p-123460_58_XM_016076439.2_711_TPlot.pdf	0	39.6024	-Inf	down	3.1118e-10	6.0515e-10	yes	GO:0051234(establishment of localization);GO:1901564(organonitrogen compound metabolic process);GO:0006518(peptide metabolic process);GO:0010467(gene expression);GO:0044238(primary metabolic process);GO:0043604(amide biosynthetic process);GO:0044249(cellular biosynthetic process);GO:0051179(localization);GO:0044260(cellular macromolecule metabolic process);GO:0031224(intrinsic component of membra…	NA
PC-3p-123460_58	XM_016116560.2	1911	1934	1925	-38.7	-25.5	0.658915	14.5	6-8,1929-1927;10-21,1925-1914	1-5,1934-1930[UP5];9-9,1926-1926[SIL];22-24,1913-1911[UP3]	...((((((((((((.(((.....&.....))).))))))))))))...	AUCCAGAUCCUCCGAAUUGGGCAG&AAAUACAAAUCGGAGGGUCUGAUU	1	32.4181	4	0.837125	Output/R24h/cleaveLand_result/t_plot/PC-3p-123460_58_XM_016116560.2_1925_TPlot.pdf	0	0	NA	NA	NA	32.4181	0	Inf	up	1.2429e-08	1.41251e-08	yes	GO:0031224(intrinsic component of membrane);GO:0044425(membrane part);GO:0016020(membrane);GO:0016021(integral component of membrane)	ko01100(Metabolic pathways);ko00600(Sphingolipid metabolism)
PC-3p-123460_58	XM_021127629.1	718	732	723	-38.7	-25.5	0.658915	3.5	11-23,731-719	10-10,732-732[SIL];24-24,718-718[UP3]	.(((((((((((((.&.))))))))))))).	CGUCAGGCCCUCCGU&AAAUACAAAUCGGAG	0	0	NA	NA	NA	1	39.6024	4	0.774558	Output/R0h/cleaveLand_result/t_plot/PC-3p-123460_58_XM_021127629.1_723_TPlot.pdf	0	39.6024	-Inf	down	3.1118e-10	6.0515e-10	yes	GO:0051234(establishment of localization);GO:1901564(organonitrogen compound metabolic process);GO:0006518(peptide metabolic process);GO:0010467(gene expression);GO:0044238(primary metabolic process);GO:0043604(amide biosynthetic process);GO:0044249(cellular biosynthetic process);GO:0051179(localization);GO:0044260(cellular macromolecule metabolic process);GO:0031224(intrinsic component of membra…	NA
PC-3p-123460_58	XM_021140428.1	452	476	467	-38.7	-25.2	0.651163	7.5	1-3,476-474;5-18,472-459;19-22,457-454	4-4,473-473[SIL];x-x,458-458[BULt];23-24,453-452[UP3]	..((((.((((((((((((((.(((&))).))))))))))))))-))))..	GCUCAGCAUCCUCUGGUUUGUUUUU&AAAUACAAAUCGGAGGGU-CUGAUU	0	0	NA	NA	NA	1	39.6024	4	0.819205	Output/R0h/cleaveLand_result/t_plot/PC-3p-123460_58_XM_021140428.1_467_TPlot.pdf	0	39.6024	-Inf	down	3.1118e-10	6.0515e-10	yes	NA	NA
PC-3p-124350_58	XM_016082326.1	297	321	312	-36.6	-24.6	0.672131	13	7-21,315-301;23-24,298-297	1-6,321-316[UP5];22-22,300-299[AILt]	((..(((((((((((((((......&......)))))))))))))))-.))	GAGCAAAUCCACAAUCCGAACACCU&AUAAGAUCGGAUUGUGGAUUU-AUC	1	32.4181	4	0.636057	Output/R24h/cleaveLand_result/t_plot/PC-3p-124350_58_XM_016082326.1_312_TPlot.pdf	0	0	NA	NA	NA	32.4181	0	Inf	up	1.2429e-08	1.41251e-08	yes	NA	NA
PC-3p-124350_58	XM_016088092.2	300	323	314	-36.6	-24.4	0.666667	12.5	5-21,319-303;24-24,300-300	1-4,323-320[UP5];22-23,302-301[SIL]	(..(((((((((((((((((....&....)))))))))))))))))..)	GUGAGGUCCACGGUUCGAUCCCAC&AUAAGAUCGGAUUGUGGAUUUAUC	1	32.4181	4	0.682916	Output/R24h/cleaveLand_result/t_plot/PC-3p-124350_58_XM_016088092.2_314_TPlot.pdf	1	39.6024	4	0.601307	Output/R0h/cleaveLand_result/t_plot/PC-3p-124350_58_XM_016088092.2_314_TPlot.pdf	32.4181	39.6024	-0.28879	down	0.39723	0.398704	yes	GO:0046872(metal ion binding);GO:0009636(response to toxic substance);GO:0006979(response to oxidative stress);GO:0009664(plant-type cell wall organization);GO:0042743(hydrogen peroxide metabolic process);GO:0005488(binding);GO:0050896(response to stimulus);GO:0005618(cell wall);GO:0009505(plant-type cell wall);GO:0016043(cellular component organization);GO:0071554(cell wall organization or bioge…	ko00940(Phenylpropanoid biosynthesis);ko01100(Metabolic pathways);ko01110(Biosynthesis of secondary metabolites)
PC-3p-124350_58	XM_016092863.2	534	560	551	-36.6	-24.3	0.663934	15	4-12,557-549;13-21,545-537	1-3,560-558[UP5];x-x,548-546[BULt];22-24,536-534[UP3]	...(((((((((...(((((((((...&...)))))))))---)))))))))...	UCCAAGUCCGCAAUCAUCCGAUCUACA&AUAAGAUCGGAU---UGUGGAUUUAUC	0	0	NA	NA	NA	5	198.012	2	0.314537	Output/R0h/cleaveLand_result/t_plot/PC-3p-124350_58_XM_016092863.2_551_TPlot.pdf	0	198.012	-Inf	down	5.6156e-45	3.29337e-43	yes	NA	NA
PC-3p-124350_58	XM_016095321.2	265	288	279	-36.6	-25.3	0.691257	12	6-23,283-266	1-5,288-284[UP5];24-24,265-265[UP3]	.((((((((((((((((((.....&.....)))))))))))))))))).	AAUGGAUCCACAAUCUGAUGCAGU&AUAAGAUCGGAUUGUGGAUUUAUC	1	32.4181	4	0.55247	Output/R24h/cleaveLand_result/t_plot/PC-3p-124350_58_XM_016095321.2_279_TPlot.pdf	2	79.2048	2	0.176658	Output/R0h/cleaveLand_result/t_plot/PC-3p-124350_58_XM_016095321.2_279_TPlot.pdf	32.4181	79.2048	-1.28879	down	9.4884e-06	1.04237e-05	yes	GO:0016791(phosphatase activity);GO:0044237(cellular metabolic process);GO:0006807(nitrogen compound metabolic process);GO:0071704(organic substance metabolic process);GO:1901564(organonitrogen compound metabolic process);GO:0006464(cellular protein modification process);GO:0043170(macromolecule metabolic process);GO:0016311(dephosphorylation);GO:0016787(hydrolase activity);GO:0004721(phosphoprot…	NA
PC-3p-124677_58	XM_016092951.2	4410	4431	4422	-43.7	-29.6	0.677346	8	2-4,4430-4428;7-12,4425-4420;15-24,4419-4410	1-1,4431-4431[UP5];5-6,4427-4426[SIL];13-14,x-x[BULq]	((((((((((--((((((..(((.&.)))..))))))..))))))))))	GGUGCAGAAG--GGAACGGACGAG&AUCGGACGUUCCGAUUUCUGUACC	0	0	NA	NA	NA	1	39.6024	4	0.268496	Output/R0h/cleaveLand_result/t_plot/PC-3p-124677_58_XM_016092951.2_4422_TPlot.pdf	0	39.6024	-Inf	down	3.1118e-10	6.0515e-10	yes	GO:0005515(protein binding);GO:0016772(transferase activity, transferring phosphorus-containing groups);GO:0003779(actin binding);GO:0006796(phosphate-containing compound metabolic process);GO:0009987(cellular process);GO:0016740(transferase activity);GO:0016301(kinase activity);GO:0016310(phosphorylation);GO:0006793(phosphorus metabolic process);GO:0003824(catalytic activity);GO:0005488(binding)…	NA
PC-3p-124677_58	XM_016093018.2	666	692	682	-43.7	-28.5	0.652174	8	2-8,691-685;9-16,683-676;17-21,674-670;22-24,668-666	1-1,692-692[UP5];x-x,684-684[BULt];x-x,675-675[BULt];x-x,669-669[BULt]	(((.(((((.((((((((.(((((((.&.)))))))-))))))))-)))))-)))	GGUCACAGAUAAUCGGGAGUGUCUGAA&AUCGGACG-UUCCGAUU-UCUGU-ACC	1	32.4181	4	0.837125	Output/R24h/cleaveLand_result/t_plot/PC-3p-124677_58_XM_016093018.2_682_TPlot.pdf	0	0	NA	NA	NA	32.4181	0	Inf	up	1.2429e-08	1.41251e-08	yes	GO:0051649(establishment of localization in cell);GO:0005622(intracellular);GO:0005623(cell);GO:0010605(negative regulation of macromolecule metabolic process);GO:0051172(negative regulation of nitrogen compound metabolic process);GO:0070727(cellular macromolecule localization);GO:0065007(biological regulation);GO:0006612(protein targeting to membrane);GO:0070972(protein localization to endoplasm…	ko03060(Protein export)
PC-3p-127107_56	BGI_novel_T000049	3506	3529	3519	-36.6	-24.4	0.666667	10	1-5,3529-3525;6-11,3523-3518;12-19,3515-3508	x-x,3524-3524[BULt];x-x,3517-3516[BULt];20-21,3507-3506[UP3]	..((((((((..((((((.(((((&)))))-))))))--))))))))..	GUUGGUUCCAGAAGGUUCUUUGGA&UCUAA-GAGCCU--UGGAACCAUA	0	0	NA	NA	NA	2	79.2048	2	0.880819	Output/R0h/cleaveLand_result/t_plot/PC-3p-127107_56_BGI_novel_T000049_3519_TPlot.pdf	0	79.2048	-Inf	down	5.5905e-19	3.88279e-18	yes	NA	NA
PC-3p-127107_56	BGI_novel_T000220	1878	1898	1889	-36.6	-27.1	0.740437	11	6-20,1893-1879	1-5,1898-1894[UP5];21-21,1878-1878[UP3]	.(((((((((((((((.....&.....))))))))))))))).	AAUGGUUCCAAGGUUCAAAAU&UCUAAGAGCCUUGGAACCAUA	3	97.2542	2	0.369761	Output/R24h/cleaveLand_result/t_plot/PC-3p-127107_56_BGI_novel_T000220_1889_TPlot.pdf	2	79.2048	2	0.287363	Output/R0h/cleaveLand_result/t_plot/PC-3p-127107_56_BGI_novel_T000220_1889_TPlot.pdf	97.2542	79.2048	0.296173	up	0.17421	0.183533	yes	GO:0016705(oxidoreductase activity, acting on paired donors, with incorporation or reduction of molecular oxygen);GO:0046872(metal ion binding);GO:0043167(ion binding);GO:0016021(integral component of membrane);GO:0046906(tetrapyrrole binding);GO:0008152(metabolic process);GO:0016020(membrane);GO:0044425(membrane part);GO:0031224(intrinsic component of membrane);GO:0004497(monooxygenase activity)…	ko00906(Carotenoid biosynthesis)
PC-3p-127107_56	BGI_novel_T003945	523	541	532	-36.6	-25.5	0.696721	8	2-10,540-532;13-20,531-524	1-1,541-541[UP5];11-12,x-x[BULq];21-21,523-523[UP3]	.((((((((--(((((((((.&.)))))))))..)))))))).	AGUGGUUCU--GGCUCUUGGU&UCUAAGAGCCUUGGAACCAUA	1	32.4181	4	0.978916	Output/R24h/cleaveLand_result/t_plot/PC-3p-127107_56_BGI_novel_T003945_532_TPlot.pdf	0	0	NA	NA	NA	32.4181	0	Inf	up	1.2429e-08	1.41251e-08	yes	GO:0043229(intracellular organelle);GO:0043226(organelle);GO:0046914(transition metal ion binding);GO:0032259(methylation);GO:0016741(transferase activity, transferring one-carbon groups);GO:0008270(zinc ion binding);GO:0005623(cell);GO:0008168(methyltransferase activity);GO:0044424(intracellular part);GO:0005622(intracellular);GO:0046872(metal ion binding);GO:0003824(catalytic activity);GO:00081…	ko00310(Lysine degradation)
PC-3p-127107_56	BGI_novel_T008904	2588	2611	2599	-36.6	-26.3	0.718579	11	1-3,2611-2609;4-6,2604-2602;8-20,2601-2589	x-x,2608-2605[BULt];7-7,x-x[BULq];21-21,2588-2588[UP3]	.(((((((((((((-(((....(((&)))----))).))))))))))))).	GAUGGUUCCAAGGC-CUUCCCAAGA&UCU----AAGAGCCUUGGAACCAUA	5	162.09	2	0.530841	Output/R24h/cleaveLand_result/t_plot/PC-3p-127107_56_BGI_novel_T008904_2599_TPlot.pdf	1	39.6024	4	0.841044	Output/R0h/cleaveLand_result/t_plot/PC-3p-127107_56_BGI_novel_T008904_2599_TPlot.pdf	162.09	39.6024	2.03314	up	6.3971e-18	4.36528e-17	yes	NA	NA
PC-3p-127107_56	BGI_novel_T013890	1210	1233	1223	-36.6	-25.1	0.685792	8	1-3,1233-1231;4-14,1229-1219;15-18,1216-1213	x-x,1230-1230[BULt];x-x,1218-1217[BULt];19-21,1212-1210[UP3]	...((((..(((((((((((.(((&)))-)))))))))))--))))...	AACGGUUUGCCGAGGCUCUUAAGA&UCU-AAGAGCCUUGG--AACCAUA	1	32.4181	4	0.995476	Output/R24h/cleaveLand_result/t_plot/PC-3p-127107_56_BGI_novel_T013890_1223_TPlot.pdf	0	0	NA	NA	NA	32.4181	0	Inf	up	1.2429e-08	1.41251e-08	yes	GO:0016787(hydrolase activity);GO:0031224(intrinsic component of membrane);GO:0044425(membrane part);GO:0016021(integral component of membrane);GO:0008152(metabolic process);GO:0016020(membrane);GO:0003824(catalytic activity)	ko00900(Terpenoid backbone biosynthesis)
PC-3p-127107_56	XM_016077050.2	1586	1605	1597	-36.6	-25.3	0.691257	6	1-9,1605-1597;11-14,1596-1593;17-21,1590-1586	10-10,x-x[BULq];15-16,1592-1591[SIL]	(((((..((((-(((((((((&))))))))).))))..)))))	UAUGGGACCGA-GCUCUUGGA&UCUAAGAGCCUUGGAACCAUA	1	32.4181	4	0.988128	Output/R24h/cleaveLand_result/t_plot/PC-3p-127107_56_XM_016077050.2_1597_TPlot.pdf	0	0	NA	NA	NA	32.4181	0	Inf	up	1.2429e-08	1.41251e-08	yes	GO:0044237(cellular metabolic process);GO:0006099(tricarboxylic acid cycle);GO:0019752(carboxylic acid metabolic process);GO:0016740(transferase activity);GO:0072350(tricarboxylic acid metabolic process);GO:0046912(transferase activity, transferring acyl groups, acyl groups converted into alkyl on transfer);GO:0071704(organic substance metabolic process);GO:0044238(primary metabolic process);GO:0…	ko01210(2-Oxocarboxylic acid metabolism);ko00020(Citrate cycle (TCA cycle));ko01200(Carbon metabolism);ko01230(Biosynthesis of amino acids);ko01110(Biosynthesis of secondary metabolites);ko01100(Metabolic pathways);ko00630(Glyoxylate and dicarboxylate metabolism)
PC-3p-127107_56	XM_016077051.2	1664	1683	1675	-36.6	-25.3	0.691257	6	1-9,1683-1675;11-14,1674-1671;17-21,1668-1664	10-10,x-x[BULq];15-16,1670-1669[SIL]	(((((..((((-(((((((((&))))))))).))))..)))))	UAUGGGACCGA-GCUCUUGGA&UCUAAGAGCCUUGGAACCAUA	1	32.4181	4	0.98757	Output/R24h/cleaveLand_result/t_plot/PC-3p-127107_56_XM_016077051.2_1675_TPlot.pdf	1	39.6024	4	0.970185	Output/R0h/cleaveLand_result/t_plot/PC-3p-127107_56_XM_016077051.2_1675_TPlot.pdf	32.4181	39.6024	-0.28879	down	0.39723	0.398704	yes	GO:0044237(cellular metabolic process);GO:0006099(tricarboxylic acid cycle);GO:0019752(carboxylic acid metabolic process);GO:0016740(transferase activity);GO:0072350(tricarboxylic acid metabolic process);GO:0046912(transferase activity, transferring acyl groups, acyl groups converted into alkyl on transfer);GO:0071704(organic substance metabolic process);GO:0044238(primary metabolic process);GO:0…	ko01210(2-Oxocarboxylic acid metabolism);ko00020(Citrate cycle (TCA cycle));ko01200(Carbon metabolism);ko01230(Biosynthesis of amino acids);ko01110(Biosynthesis of secondary metabolites);ko01100(Metabolic pathways);ko00630(Glyoxylate and dicarboxylate metabolism)
PC-3p-127107_56	XM_016078484.2	1117	1137	1128	-36.6	-25.9	0.70765	7	1-3,1137-1135;6-15,1132-1123;17-21,1121-1117	4-5,1134-1133[SIL];16-16,1122-1122[SIL]	(((((.((((((((((..(((&)))..)))))))))).)))))	UGUGGAUCCAAGGCUUGAAGG&UCUAAGAGCCUUGGAACCAUA	0	0	NA	NA	NA	1	39.6024	4	0.887922	Output/R0h/cleaveLand_result/t_plot/PC-3p-127107_56_XM_016078484.2_1128_TPlot.pdf	0	39.6024	-Inf	down	3.1118e-10	6.0515e-10	yes	GO:0044260(cellular macromolecule metabolic process);GO:0008152(metabolic process);GO:0016740(transferase activity);GO:0032555(purine ribonucleotide binding);GO:0016773(phosphotransferase activity, alcohol group as acceptor);GO:0038023(signaling receptor activity);GO:1901363(heterocyclic compound binding);GO:0032553(ribonucleotide binding);GO:0005488(binding);GO:0043168(anion binding);GO:0004871(…	NA
PC-3p-127107_56	XM_016079665.2	358	379	370	-36.6	-24.6	0.672131	9	1-4,379-376;7-10,373-370;11-19,368-360	5-6,375-374[SIL];x-x,369-369[BULt];20-21,359-358[UP3]	..(((((((((.((((..((((&))))..))))-)))))))))..	GCUGGUUCCAAUGGCUACUGGA&UCUAAGAGCC-UUGGAACCAUA	0	0	NA	NA	NA	1	39.6024	4	0.997417	Output/R0h/cleaveLand_result/t_plot/PC-3p-127107_56_XM_016079665.2_370_TPlot.pdf	0	39.6024	-Inf	down	3.1118e-10	6.0515e-10	yes	GO:0004175(endopeptidase activity);GO:0008152(metabolic process);GO:0043231(intracellular membrane-bounded organelle);GO:0071704(organic substance metabolic process);GO:0005623(cell);GO:0044248(cellular catabolic process);GO:0043229(intracellular organelle);GO:0010467(gene expression);GO:0005737(cytoplasm);GO:0070011(peptidase activity, acting on L-amino acid peptides);GO:0044424(intracellular pa…	NA
PC-3p-127107_56	XM_016079850.2	964	985	976	-36.6	-24.5	0.669399	5	1-12,985-974;14-17,971-968;19-21,966-964	13-13,973-972[AILt];18-18,967-967[SIL]	(((.((((..((((((((((((&))))))))))))-.)))).)))	UAUAGUUCUGGAGGCUCUUAGA&UCUAAGAGCCUU-GGAACCAUA	1	32.4181	4	0.99967	Output/R24h/cleaveLand_result/t_plot/PC-3p-127107_56_XM_016079850.2_976_TPlot.pdf	0	0	NA	NA	NA	32.4181	0	Inf	up	1.2429e-08	1.41251e-08	yes	GO:0009987(cellular process);GO:0015301(anion:anion antiporter activity);GO:0006839(mitochondrial transport);GO:0005623(cell);GO:0022804(active transmembrane transporter activity);GO:0031966(mitochondrial membrane);GO:0008509(anion transmembrane transporter activity);GO:0031967(organelle envelope);GO:0005743(mitochondrial inner membrane);GO:0051649(establishment of localization in cell);GO:007184…	NA
PC-3p-127107_56	XM_016081719.2	866	887	878	-36.6	-24.3	0.663934	6.5	1-5,887-883;7-14,881-874;15-18,872-869	6-6,882-882[SIL];x-x,873-873[BULt];19-21,868-866[UP3]	...((((.((((((((.(((((&))))).))))))))-))))...	CGGGGUUAUCAAGGCUGUUAGA&UCUAAGAGCCUUGG-AACCAUA	0	0	NA	NA	NA	1	39.6024	4	0.999611	Output/R0h/cleaveLand_result/t_plot/PC-3p-127107_56_XM_016081719.2_878_TPlot.pdf	0	39.6024	-Inf	down	3.1118e-10	6.0515e-10	yes	GO:1901265(nucleoside phosphate binding);GO:1901363(heterocyclic compound binding);GO:0043168(anion binding);GO:0015399(primary active transmembrane transporter activity);GO:0016462(pyrophosphatase activity);GO:0022804(active transmembrane transporter activity);GO:0005524(ATP binding);GO:0042623(ATPase activity, coupled);GO:0003824(catalytic activity);GO:0016887(ATPase activity);GO:0042910(xenobi…	ko00920(Sulfur metabolism);ko02010(ABC transporters);ko03018(RNA degradation)
PC-3p-127107_56	XM_016085235.2	1284	1306	1295	-36.6	-23.8	0.650273	10	1-4,1306-1303;5-13,1300-1292;16-20,1289-1285	x-x,1302-1301[BULt];14-15,1291-1290[SIL];21-21,1284-1284[UP3]	.(((((..(((((((((..((((&))))--)))))))))..))))).	GAUGGUGACAGGGUUCUGAUGGA&UCUA--AGAGCCUUGGAACCAUA	1	32.4181	4	1	Output/R24h/cleaveLand_result/t_plot/PC-3p-127107_56_XM_016085235.2_1295_TPlot.pdf	0	0	NA	NA	NA	32.4181	0	Inf	up	1.2429e-08	1.41251e-08	yes	NA	NA
PC-3p-127107_56	XM_016086001.2	1528	1548	1538	-36.6	-25.3	0.691257	7.5	1-7,1548-1542;8-11,1540-1537;13-18,1536-1531	x-x,1541-1541[BULt];12-12,x-x[BULq];19-21,1530-1528[UP3]	...((((((-((((.(((((((&)))))))-)))).))))))...	UUCGGUUCC-AGGCUUCUUAGG&UCUAAGA-GCCUUGGAACCAUA	0	0	NA	NA	NA	1	39.6024	4	0.974264	Output/R0h/cleaveLand_result/t_plot/PC-3p-127107_56_XM_016086001.2_1538_TPlot.pdf	0	39.6024	-Inf	down	3.1118e-10	6.0515e-10	yes	GO:0005694(chromosome);GO:0000280(nuclear division);GO:0000228(nuclear chromosome);GO:0051321(meiotic cell cycle);GO:0031981(nuclear lumen);GO:0070013(intracellular organelle lumen);GO:0005623(cell);GO:0031974(membrane-enclosed lumen);GO:0009987(cellular process);GO:0044424(intracellular part);GO:0043227(membrane-bounded organelle);GO:0030983(mismatched DNA binding);GO:0022402(cell cycle process)…	ko03430(Mismatch repair)
PC-3p-127107_56	XM_016086845.2	624	643	635	-36.6	-25.2	0.688525	6.5	1-3,643-641;7-21,638-624	4-6,640-639[AILq]	(((((((((((((((..-(((&)))...)))))))))))))))	UAUGGUUUCAAGGCUGA-AGA&UCUAAGAGCCUUGGAACCAUA	3	97.2542	2	0.812234	Output/R24h/cleaveLand_result/t_plot/PC-3p-127107_56_XM_016086845.2_635_TPlot.pdf	0	0	NA	NA	NA	97.2542	0	Inf	up	6.0829e-23	7.372e-22	yes	GO:0018108(peptidyl-tyrosine phosphorylation);GO:0006468(protein phosphorylation);GO:0006807(nitrogen compound metabolic process);GO:0071704(organic substance metabolic process);GO:1901265(nucleoside phosphate binding);GO:0005524(ATP binding);GO:0035639(purine ribonucleoside triphosphate binding);GO:0032559(adenyl ribonucleotide binding);GO:0003824(catalytic activity);GO:0006464(cellular protein …	ko04626(Plant-pathogen interaction)
PC-3p-127107_56	XM_016086846.2	674	693	685	-36.6	-25.2	0.688525	6.5	1-3,693-691;7-21,688-674	4-6,690-689[AILq]	(((((((((((((((..-(((&)))...)))))))))))))))	UAUGGUUUCAAGGCUGA-AGA&UCUAAGAGCCUUGGAACCAUA	2	64.8361	2	0.798999	Output/R24h/cleaveLand_result/t_plot/PC-3p-127107_56_XM_016086846.2_685_TPlot.pdf	1	39.6024	4	0.979737	Output/R0h/cleaveLand_result/t_plot/PC-3p-127107_56_XM_016086846.2_685_TPlot.pdf	64.8361	39.6024	0.71121	up	0.01354	0.0144021	yes	GO:0018108(peptidyl-tyrosine phosphorylation);GO:0006468(protein phosphorylation);GO:0006807(nitrogen compound metabolic process);GO:0071704(organic substance metabolic process);GO:1901265(nucleoside phosphate binding);GO:0005524(ATP binding);GO:0035639(purine ribonucleoside triphosphate binding);GO:0032559(adenyl ribonucleotide binding);GO:0003824(catalytic activity);GO:0006464(cellular protein …	ko04626(Plant-pathogen interaction)
PC-3p-127107_56	XM_016087079.2	666	687	677	-36.6	-26.5	0.724044	7	1-7,687-681;8-15,679-672;17-18,670-669	x-x,680-680[BULt];16-16,671-671[SIL];19-21,668-666[UP3]	...((.((((((((.(((((((&)))))))-)))))))).))...	ACAGGGUCCAAGGCUUCUUGGA&UCUAAGA-GCCUUGGAACCAUA	0	0	NA	NA	NA	1	39.6024	4	0.805403	Output/R0h/cleaveLand_result/t_plot/PC-3p-127107_56_XM_016087079.2_677_TPlot.pdf	0	39.6024	-Inf	down	3.1118e-10	6.0515e-10	yes	GO:0016740(transferase activity);GO:0009987(cellular process);GO:0006644(phospholipid metabolic process);GO:0008152(metabolic process);GO:0090407(organophosphate biosynthetic process);GO:0006657(CDP-choline pathway);GO:1901576(organic substance biosynthetic process);GO:0006629(lipid metabolic process);GO:0019637(organophosphate metabolic process);GO:0003824(catalytic activity);GO:0046486(glycerol…	ko00564(Glycerophospholipid metabolism);ko01100(Metabolic pathways)
PC-3p-127107_56	XM_016090403.2	806	829	819	-36.6	-24.2	0.661202	10	2-6,828-824;7-11,822-818;12-18,815-809	1-1,829-829[UP5];x-x,823-823[BULt];x-x,817-816[BULt];19-21,808-806[UP3]	...(((((((..(((((.(((((.&.)))))-)))))--)))))))...	UGCGGUUCCAAAAGGCUACUUAGC&UCUAAG-AGCCU--UGGAACCAUA	0	0	NA	NA	NA	1	39.6024	4	0.999893	Output/R0h/cleaveLand_result/t_plot/PC-3p-127107_56_XM_016090403.2_819_TPlot.pdf	0	39.6024	-Inf	down	3.1118e-10	6.0515e-10	yes	GO:0009719(response to endogenous stimulus);GO:0050896(response to stimulus);GO:0010033(response to organic substance);GO:0042221(response to chemical);GO:0009725(response to hormone);GO:0009733(response to auxin)	ko04075(Plant hormone signal transduction)
PC-3p-127107_56	XM_016093482.2	392	418	408	-36.6	-24.6	0.672131	12	1-3,418-416;5-15,413-403;16-19,397-394	4-4,415-414[AILt];x-x,402-398[BULt];20-21,393-392[UP3]	..((((.....(((((((((((..(((&)))-.)))))))))))-----))))..	CCUGGUUCCUUUCCGAGGCUCUGAAGA&UCU-AAGAGCCUUGGA-----ACCAUA	0	0	NA	NA	NA	1	39.6024	4	0.997687	Output/R0h/cleaveLand_result/t_plot/PC-3p-127107_56_XM_016093482.2_408_TPlot.pdf	0	39.6024	-Inf	down	3.1118e-10	6.0515e-10	yes	GO:0008152(metabolic process);GO:0003954(NADH dehydrogenase activity);GO:0016491(oxidoreductase activity);GO:0003824(catalytic activity);GO:0050136(NADH dehydrogenase (quinone) activity);GO:0008137(NADH dehydrogenase (ubiquinone) activity);GO:0016655(oxidoreductase activity, acting on NAD(P)H, quinone or similar compound as acceptor);GO:0016651(oxidoreductase activity, acting on NAD(P)H);GO:00551…	ko01100(Metabolic pathways);ko00190(Oxidative phosphorylation)
PC-3p-127107_56	XM_016094771.2	79	100	91	-36.6	-24.2	0.661202	11	6-15,95-86;16-21,84-79	1-5,100-96[UP5];x-x,85-85[BULt]	((((((.((((((((((.....&.....))))))))))-))))))	UAUGGUCUCCAAGGUUCAAAAU&UCUAAGAGCCUUGGA-ACCAUA	0	0	NA	NA	NA	1	39.6024	4	0.999889	Output/R0h/cleaveLand_result/t_plot/PC-3p-127107_56_XM_016094771.2_91_TPlot.pdf	0	39.6024	-Inf	down	3.1118e-10	6.0515e-10	yes	NA	NA
PC-3p-127107_56	XM_016098109.2	1269	1289	1280	-36.6	-24.5	0.669399	12.5	6-19,1284-1271	1-5,1289-1285[UP5];20-21,1270-1269[UP3]	..((((((((((((((.....&.....))))))))))))))..	UUUGGUUCUGAGGCUCCGUGG&UCUAAGAGCCUUGGAACCAUA	4	129.672	2	0.934423	Output/R24h/cleaveLand_result/t_plot/PC-3p-127107_56_XM_016098109.2_1280_TPlot.pdf	0	0	NA	NA	NA	129.672	0	Inf	up	4.813e-30	1.15989e-28	yes	GO:0044424(intracellular part);GO:0005737(cytoplasm);GO:0005622(intracellular);GO:0044464(cell part);GO:0005623(cell)	NA
PC-3p-127107_56	XM_016101201.2	1664	1693	1676	-36.6	-24.6	0.672131	20	1-7,1693-1687;8-12,1678-1674;13-21,1672-1664	x-x,1686-1679[BULt];x-x,1673-1673[BULt]	(((((((((.(((((........(((((((&)))))))--------)))))-)))))))))	UAUGGUUCCUAAGGUGGUUAAGUUCUUGGA&UCUAAGA--------GCCUU-GGAACCAUA	2	64.8361	2	0.918945	Output/R24h/cleaveLand_result/t_plot/PC-3p-127107_56_XM_016101201.2_1676_TPlot.pdf	0	0	NA	NA	NA	64.8361	0	Inf	up	8.1306e-16	3.55976e-15	yes	GO:0003824(catalytic activity);GO:0008152(metabolic process)	ko00940(Phenylpropanoid biosynthesis);ko00130(Ubiquinone and other terpenoid-quinone biosynthesis);ko01100(Metabolic pathways);ko01110(Biosynthesis of secondary metabolites);ko00360(Phenylalanine metabolism)
PC-3p-127107_56	XM_016102252.2	771	792	782	-36.6	-24.1	0.65847	10.5	3-8,790-785;9-14,783-778;17-20,775-772	1-2,792-791[UP5];x-x,784-784[BULt];15-16,777-776[SIL];21-21,771-771[UP3]	.((((..((((((.((((((..&..))))))-))))))..)))).	GGUGGGCCCAGGGCCUCUUGAU&UCUAAGAG-CCUUGGAACCAUA	0	0	NA	NA	NA	1	39.6024	4	0.999904	Output/R0h/cleaveLand_result/t_plot/PC-3p-127107_56_XM_016102252.2_782_TPlot.pdf	0	39.6024	-Inf	down	3.1118e-10	6.0515e-10	yes	GO:1900409(positive regulation of cellular response to oxidative stress);GO:1901033(positive regulation of response to reactive oxygen species);GO:0050789(regulation of biological process);GO:1902882(regulation of response to oxidative stress);GO:0044444(cytoplasmic part);GO:0043167(ion binding);GO:0043085(positive regulation of catalytic activity);GO:0005739(mitochondrion);GO:1902884(positive re…	NA
PC-3p-127107_56	XM_016102639.1	966	991	982	-36.6	-25.5	0.696721	14	1-11,991-981;12-17,976-971;18-19,969-968	x-x,980-977[BULt];x-x,970-970[BULt];20-21,967-966[UP3]	..((.((((((....(((((((((((&)))))))))))----))))))-))..	CUUGUGUUCCGGCGGGGGCUCUUGGA&UCUAAGAGCCU----UGGAAC-CAUA	4	129.672	2	0.723787	Output/R24h/cleaveLand_result/t_plot/PC-3p-127107_56_XM_016102639.1_982_TPlot.pdf	0	0	NA	NA	NA	129.672	0	Inf	up	4.813e-30	1.15989e-28	yes	NA	ko04016(MAPK signaling pathway - plant);ko04626(Plant-pathogen interaction)
PC-3p-127107_56	XM_016102914.2	1855	1875	1866	-36.6	-26	0.710383	8.5	1-3,1875-1873;6-15,1870-1861;17-20,1859-1856	4-5,1872-1871[SIL];16-16,1860-1860[SIL];21-21,1855-1855[UP3]	.((((.((((((((((..(((&)))..)))))))))).)))).	AGUGGAUCCAAGGCUUGGGGA&UCUAAGAGCCUUGGAACCAUA	1	32.4181	4	0.928764	Output/R24h/cleaveLand_result/t_plot/PC-3p-127107_56_XM_016102914.2_1866_TPlot.pdf	0	0	NA	NA	NA	32.4181	0	Inf	up	1.2429e-08	1.41251e-08	yes	GO:0006464(cellular protein modification process);GO:0016740(transferase activity);GO:0035639(purine ribonucleoside triphosphate binding);GO:1901564(organonitrogen compound metabolic process);GO:0043412(macromolecule modification);GO:0016020(membrane);GO:0032553(ribonucleotide binding);GO:1901363(heterocyclic compound binding);GO:0008152(metabolic process);GO:0016773(phosphotransferase activity, …	ko04626(Plant-pathogen interaction)
PC-3p-127107_56	XM_016103236.2	670	690	681	-36.6	-24.4	0.666667	15	8-20,683-671	1-7,690-684[UP5];21-21,670-670[UP3]	.(((((((((((((.......&.......))))))))))))).	CAUGGUUCCGAGGCGGAUCCG&UCUAAGAGCCUUGGAACCAUA	0	0	NA	NA	NA	1	39.6024	4	0.999338	Output/R0h/cleaveLand_result/t_plot/PC-3p-127107_56_XM_016103236.2_681_TPlot.pdf	0	39.6024	-Inf	down	3.1118e-10	6.0515e-10	yes	NA	NA
PC-3p-127107_56	XM_016104137.2	545	566	556	-36.6	-24.3	0.663934	7	1-7,566-560;9-9,558-558;10-18,556-548	8-8,559-559[SIL];x-x,557-557[BULt];19-21,547-545[UP3]	...(((((((((.(.(((((((&))))))).)-)))))))))...	CAGGGUUCCAAGAGAUCUUAGA&UCUAAGAGC-CUUGGAACCAUA	10	324.181	3	0.59101	Output/R24h/cleaveLand_result/t_plot/PC-3p-127107_56_XM_016104137.2_556_TPlot.pdf	3	118.807	3	0.462336	Output/R0h/cleaveLand_result/t_plot/PC-3p-127107_56_XM_016104137.2_556_TPlot.pdf	324.181	118.807	1.44818	up	1.6914e-22	2.03222e-21	yes	GO:0050896(response to stimulus)	NA
PC-3p-127107_56	XM_016104195.2	386	408	397	-36.6	-27.4	0.748634	6	2-3,407-406;4-8,404-400;9-20,398-387	1-1,408-408[UP5];x-x,405-405[BULt];x-x,399-399[BULt];21-21,386-386[UP3]	.((((((((((((.(((((.((.&.))-)))))-)))))))))))).	GAUGGUUCCAAGGCCUCUUCAGC&UCU-AAGAG-CCUUGGAACCAUA	0	0	NA	NA	NA	1	39.6024	4	0.655856	Output/R0h/cleaveLand_result/t_plot/PC-3p-127107_56_XM_016104195.2_397_TPlot.pdf	0	39.6024	-Inf	down	3.1118e-10	6.0515e-10	yes	GO:0050896(response to stimulus)	NA
PC-3p-127107_56	XM_016104539.2	328	348	339	-36.6	-23.8	0.650273	14.5	7-20,342-329	1-6,348-343[UP5];21-21,328-328[UP3]	.((((((((((((((......&......)))))))))))))).	AGUGGUUCCAGGGUUAACGCC&UCUAAGAGCCUUGGAACCAUA	0	0	NA	NA	NA	1	39.6024	4	0.999993	Output/R0h/cleaveLand_result/t_plot/PC-3p-127107_56_XM_016104539.2_339_TPlot.pdf	0	39.6024	-Inf	down	3.1118e-10	6.0515e-10	yes	GO:0044425(membrane part);GO:0016020(membrane);GO:0016021(integral component of membrane);GO:0031224(intrinsic component of membrane)	NA
PC-3p-127107_56	XM_016107227.2	2192	2213	2203	-36.6	-23.8	0.650273	5.5	1-5,2213-2209;6-8,2207-2205;10-21,2203-2192	x-x,2208-2208[BULt];9-9,2204-2204[SIL]	((((((((((((.(((.(((((&)))))-))).))))))))))))	UAUGGUUUCAAGACUCAUUGGA&UCUAA-GAGCCUUGGAACCAUA	1	32.4181	4	1	Output/R24h/cleaveLand_result/t_plot/PC-3p-127107_56_XM_016107227.2_2203_TPlot.pdf	0	0	NA	NA	NA	32.4181	0	Inf	up	1.2429e-08	1.41251e-08	yes	GO:0000166(nucleotide binding);GO:0005488(binding);GO:0097159(organic cyclic compound binding);GO:1901363(heterocyclic compound binding);GO:1901265(nucleoside phosphate binding);GO:0043170(macromolecule metabolic process);GO:0008152(metabolic process);GO:0036094(small molecule binding);GO:0006807(nitrogen compound metabolic process);GO:1901564(organonitrogen compound metabolic process);GO:0019538…	NA
PC-3p-127107_56	XM_016107255.2	959	978	969	-36.6	-24.5	0.669399	12	6-11,973-968;13-20,967-960	1-5,978-974[UP5];12-12,x-x[BULq];21-21,959-959[UP3]	.((((((((-((((((.....&.....)))))).)))))))).	CAUGGUUCC-AGGCUCGUCUU&UCUAAGAGCCUUGGAACCAUA	1	32.4181	4	0.99975	Output/R24h/cleaveLand_result/t_plot/PC-3p-127107_56_XM_016107255.2_969_TPlot.pdf	0	0	NA	NA	NA	32.4181	0	Inf	up	1.2429e-08	1.41251e-08	yes	GO:0006793(phosphorus metabolic process);GO:0032555(purine ribonucleotide binding);GO:0016740(transferase activity);GO:0008152(metabolic process);GO:1901363(heterocyclic compound binding);GO:0016310(phosphorylation);GO:0006796(phosphate-containing compound metabolic process);GO:0006468(protein phosphorylation);GO:0035639(purine ribonucleoside triphosphate binding);GO:1901265(nucleoside phosphate …	NA
PC-3p-127107_56	XM_016107834.2	1538	1562	1552	-36.6	-23.9	0.653005	7.5	1-3,1562-1560;4-14,1558-1548;15-20,1544-1539	x-x,1559-1559[BULt];x-x,1547-1545[BULt];21-21,1538-1538[UP3]	.((((((...(((((((((((.(((&)))-)))))))))))---)))))).	GAUGGUUUUGCUGAGGCUCUUGAGA&UCU-AAGAGCCUUGG---AACCAUA	0	0	NA	NA	NA	1	39.6024	4	0.999989	Output/R0h/cleaveLand_result/t_plot/PC-3p-127107_56_XM_016107834.2_1552_TPlot.pdf	0	39.6024	-Inf	down	3.1118e-10	6.0515e-10	yes	GO:0030312(external encapsulating structure);GO:0046556(alpha-L-arabinofuranosidase activity);GO:0044424(intracellular part);GO:0071704(organic substance metabolic process);GO:0016020(membrane);GO:0043226(organelle);GO:0016787(hydrolase activity);GO:0016052(carbohydrate catabolic process);GO:0003824(catalytic activity);GO:0044238(primary metabolic process);GO:0000272(polysaccharide catabolic proc…	ko01100(Metabolic pathways);ko00520(Amino sugar and nucleotide sugar metabolism)
PC-3p-127107_56	XM_016111551.2	801	830	820	-36.6	-25.7	0.702186	22.5	1-4,830-827;6-11,824-819;12-21,810-801	5-5,826-825[AILt];x-x,818-811[BULt]	((((((((((........((((((..((((&))))-.))))))--------))))))))))	UGUGGUUCCAGAACCGCAGGGCUCGGUGGA&UCUA-AGAGCCU--------UGGAACCAUA	0	0	NA	NA	NA	2	79.2048	3	0.184937	Output/R0h/cleaveLand_result/t_plot/PC-3p-127107_56_XM_016111551.2_820_TPlot.pdf	0	79.2048	-Inf	down	5.5905e-19	3.88279e-18	yes	GO:0097159(organic cyclic compound binding);GO:0003676(nucleic acid binding);GO:1901363(heterocyclic compound binding);GO:0005488(binding);GO:0003677(DNA binding)	NA
PC-3p-127107_56	XM_016114373.2	1813	1837	1827	-36.6	-24	0.655738	10.5	2-5,1836-1833;7-15,1830-1822;16-21,1818-1813	1-1,1837-1837[UP5];6-6,1832-1831[AILt];x-x,1821-1819[BULt]	((((((...(((((((((..((((.&.))))-.)))))))))---))))))	UGUGGUUAAUCCAGGGCUGGUUGGG&UCUAA-GAGCCUUGGA---ACCAUA	0	0	NA	NA	NA	3	118.807	2	0.952596	Output/R0h/cleaveLand_result/t_plot/PC-3p-127107_56_XM_016114373.2_1827_TPlot.pdf	0	118.807	-Inf	down	1.1501e-27	2.02633e-26	yes	NA	ko03015(mRNA surveillance pathway)
PC-3p-127107_56	XM_016114429.2	175	196	187	-36.6	-24.3	0.663934	8	1-3,196-194;6-9,192-189;10-10,187-187;11-21,185-175	4-5,193-193[AILq];x-x,188-188[BULt];x-x,186-186[BULt]	(((((((((((.(.((((.-(((&)))..))))-)-)))))))))))	UAUGGUUCCAACGAGCUCG-AGA&UCUAAGAGC-C-UUGGAACCAUA	2	64.8361	2	0.964476	Output/R24h/cleaveLand_result/t_plot/PC-3p-127107_56_XM_016114429.2_187_TPlot.pdf	0	0	NA	NA	NA	64.8361	0	Inf	up	8.1306e-16	3.55976e-15	yes	GO:0005524(ATP binding);GO:0032553(ribonucleotide binding);GO:0043167(ion binding);GO:1901265(nucleoside phosphate binding);GO:0000166(nucleotide binding);GO:0043169(cation binding);GO:0003824(catalytic activity);GO:0043168(anion binding);GO:0016787(hydrolase activity);GO:0016020(membrane);GO:0035639(purine ribonucleoside triphosphate binding);GO:0032559(adenyl ribonucleotide binding);GO:0031224(…	NA
PC-3p-127107_56	XM_016116888.2	2437	2460	2448	-36.6	-26.3	0.718579	11	1-3,2460-2458;4-6,2453-2451;8-20,2450-2438	x-x,2457-2454[BULt];7-7,x-x[BULq];21-21,2437-2437[UP3]	.(((((((((((((-(((....(((&)))----))).))))))))))))).	GAUGGUUCCAAGGC-CUUCCCAAGA&UCU----AAGAGCCUUGGAACCAUA	3	97.2542	2	0.541373	Output/R24h/cleaveLand_result/t_plot/PC-3p-127107_56_XM_016116888.2_2448_TPlot.pdf	2	79.2048	2	0.435629	Output/R0h/cleaveLand_result/t_plot/PC-3p-127107_56_XM_016116888.2_2448_TPlot.pdf	97.2542	79.2048	0.296173	up	0.17421	0.183533	yes	NA	NA
PC-3p-127107_56	XM_021125451.1	2050	2071	2062	-36.6	-24.4	0.666667	12	6-13,2066-2059;14-19,2057-2052	1-5,2071-2067[UP5];x-x,2058-2058[BULt];20-21,2051-2050[UP3]	..((((((.((((((((.....&.....))))))))-))))))..	UCUGGUUCACAAGGCUCAUCUA&UCUAAGAGCCUUG-GAACCAUA	0	0	NA	NA	NA	1	39.6024	4	0.999274	Output/R0h/cleaveLand_result/t_plot/PC-3p-127107_56_XM_021125451.1_2062_TPlot.pdf	0	39.6024	-Inf	down	3.1118e-10	6.0515e-10	yes	GO:0044425(membrane part);GO:0016020(membrane);GO:0016021(integral component of membrane);GO:0031224(intrinsic component of membrane)	NA
PC-3p-127107_56	XM_021138549.1	180	200	191	-36.6	-23.9	0.653005	8	1-4,200-197;6-14,195-187;17-18,184-183	5-5,196-196[SIL];15-16,186-185[SIL];19-21,182-180[UP3]	...((..(((((((((.((((&)))).)))))))))..))...	GCCGGGACCAAGGCUUCUAGA&UCUAAGAGCCUUGGAACCAUA	1	32.4181	4	0.999999	Output/R24h/cleaveLand_result/t_plot/PC-3p-127107_56_XM_021138549.1_191_TPlot.pdf	0	0	NA	NA	NA	32.4181	0	Inf	up	1.2429e-08	1.41251e-08	yes	GO:0036211(protein modification process);GO:0031418(L-ascorbic acid binding);GO:0043167(ion binding);GO:0016021(integral component of membrane);GO:0071704(organic substance metabolic process);GO:0003824(catalytic activity);GO:0043170(macromolecule metabolic process);GO:0006807(nitrogen compound metabolic process);GO:0016705(oxidoreductase activity, acting on paired donors, with incorporation or r…	ko01100(Metabolic pathways);ko00330(Arginine and proline metabolism)
PC-3p-127107_56	XM_021139693.1	1856	1876	1867	-36.6	-26	0.710383	8.5	1-3,1876-1874;6-15,1871-1862;17-20,1860-1857	4-5,1873-1872[SIL];16-16,1861-1861[SIL];21-21,1856-1856[UP3]	.((((.((((((((((..(((&)))..)))))))))).)))).	AGUGGAUCCAAGGCUUGGGGA&UCUAAGAGCCUUGGAACCAUA	1	32.4181	4	0.930381	Output/R24h/cleaveLand_result/t_plot/PC-3p-127107_56_XM_021139693.1_1867_TPlot.pdf	0	0	NA	NA	NA	32.4181	0	Inf	up	1.2429e-08	1.41251e-08	yes	GO:0006464(cellular protein modification process);GO:0016740(transferase activity);GO:0035639(purine ribonucleoside triphosphate binding);GO:1901564(organonitrogen compound metabolic process);GO:0043412(macromolecule modification);GO:0016020(membrane);GO:0032553(ribonucleotide binding);GO:1901363(heterocyclic compound binding);GO:0008152(metabolic process);GO:0016773(phosphotransferase activity, …	ko04626(Plant-pathogen interaction)
PC-3p-127107_56	XM_021140420.1	689	712	701	-36.6	-24.98	0.682514	12	1-4,712-709;7-10,704-701;11-20,699-690	5-6,708-705[AILt];x-x,700-700[BULt];21-21,689-689[UP3]	.((((((((((.((((....((((&))))--..))))-)))))))))).	GAUGGUUCCAAGGGCUGAGGUGGA&UCUA--AGAGCC-UUGGAACCAUA	1	32.4181	4	0.997333	Output/R24h/cleaveLand_result/t_plot/PC-3p-127107_56_XM_021140420.1_701_TPlot.pdf	0	0	NA	NA	NA	32.4181	0	Inf	up	1.2429e-08	1.41251e-08	yes	NA	NA
PC-3p-127107_56	XM_021143610.1	731	751	743	-36.6	-23.9	0.653005	5.5	1-4,751-748;6-15,747-738;16-21,736-731	5-5,x-x[BULq];x-x,737-737[BULt]	((((((.((((((((((-((((&)))).))))))))))-))))))	UAUGGUGUUCAAGGUUC-UGGA&UCUAAGAGCCUUGGA-ACCAUA	1	32.4181	4	0.999999	Output/R24h/cleaveLand_result/t_plot/PC-3p-127107_56_XM_021143610.1_743_TPlot.pdf	0	0	NA	NA	NA	32.4181	0	Inf	up	1.2429e-08	1.41251e-08	yes	GO:0043226(organelle);GO:1901360(organic cyclic compound metabolic process);GO:0043170(macromolecule metabolic process);GO:0036094(small molecule binding);GO:0097159(organic cyclic compound binding);GO:0005488(binding);GO:0050794(regulation of cellular process);GO:0016070(RNA metabolic process);GO:0044238(primary metabolic process);GO:1901363(heterocyclic compound binding);GO:0044260(cellular mac…	NA
PC-3p-12725_949	BGI_novel_T002425	1025	1045	1036	-39.4	-28	0.71066	9	4-9,1042-1037;11-21,1035-1025	1-3,1045-1043[UP5];10-10,1036-1036[SIL]	(((((((((((.((((((...&...)))))).)))))))))))	GAGGGAUCGAGACGGCGGUGC&UUCCCGUCGACUUGAUCUCUC	0	0	NA	NA	NA	1	39.6024	4	0.529539	Output/R0h/cleaveLand_result/t_plot/PC-3p-12725_949_BGI_novel_T002425_1036_TPlot.pdf	0	39.6024	-Inf	down	3.1118e-10	6.0515e-10	yes	NA	NA
PC-3p-12725_949	BGI_novel_T011978	542	563	553	-39.4	-26.1	0.662437	8	1-4,563-560;6-8,557-555;11-21,552-542	5-5,559-558[AILt];9-10,554-553[SIL]	(((((((((((..(((..((((&))))-.)))..)))))))))))	GAGAGAUCAAGAAGACUUGGAA&UUCC-CGUCGACUUGAUCUCUC	0	0	NA	NA	NA	1	39.6024	4	0.99789	Output/R0h/cleaveLand_result/t_plot/PC-3p-12725_949_BGI_novel_T011978_553_TPlot.pdf	0	39.6024	-Inf	down	3.1118e-10	6.0515e-10	yes	NA	ko00052(Galactose metabolism)
PC-3p-12725_949	BGI_novel_T013847	750	779	770	-39.4	-27.2	0.690355	22.5	1-5,779-775;7-12,773-768;13-21,758-750	6-6,774-774[SIL];x-x,767-759[BULt]	(((((((((.........((((((.(((((&))))).))))))---------)))))))))	GGGAGAUCACACCAUCAUGGUCGGAGGGAA&UUCCCGUCGACU---------UGAUCUCUC	1	32.4181	4	0.927108	Output/R24h/cleaveLand_result/t_plot/PC-3p-12725_949_BGI_novel_T013847_770_TPlot.pdf	0	0	NA	NA	NA	32.4181	0	Inf	up	1.2429e-08	1.41251e-08	yes	GO:0003824(catalytic activity);GO:0044260(cellular macromolecule metabolic process);GO:0043169(cation binding);GO:0043170(macromolecule metabolic process);GO:0009056(catabolic process);GO:0032446(protein modification by small protein conjugation);GO:0008152(metabolic process);GO:0036211(protein modification process);GO:0071704(organic substance metabolic process);GO:0051603(proteolysis involved i…	NA
PC-3p-12725_949	XM_016078066.2	984	1004	995	-39.4	-26.2	0.664975	8	2-4,1003-1001;5-8,999-996;10-21,995-984	1-1,1004-1004[UP5];x-x,1000-1000[BULt];9-9,x-x[BULq]	((((((((((((-((((.(((.&.)))-)))).))))))))))))	GAGGGGUCAGGU-GAUGAGGAC&UUCC-CGUCGACUUGAUCUCUC	0	0	NA	NA	NA	1	39.6024	4	0.996952	Output/R0h/cleaveLand_result/t_plot/PC-3p-12725_949_XM_016078066.2_995_TPlot.pdf	0	39.6024	-Inf	down	3.1118e-10	6.0515e-10	yes	GO:0043168(anion binding);GO:0046872(metal ion binding);GO:0044434(chloroplast part);GO:0097367(carbohydrate derivative binding);GO:0009408(response to heat);GO:0043227(membrane-bounded organelle);GO:0009628(response to abiotic stimulus);GO:0031975(envelope);GO:0005488(binding);GO:0017076(purine nucleotide binding);GO:0005515(protein binding);GO:0031072(heat shock protein binding);GO:0005524(ATP …	NA
PC-3p-12725_949	XM_016086021.2	183	203	194	-39.4	-29.6	0.751269	5	1-10,203-194;12-19,192-185	11-11,193-193[SIL];20-21,184-183[UP3]	..((((((((.((((((((((&)))))))))).))))))))..	ACGGGAUCGACUCGACGGGAA&UUCCCGUCGACUUGAUCUCUC	2	64.8361	2	0.0658454	Output/R24h/cleaveLand_result/t_plot/PC-3p-12725_949_XM_016086021.2_194_TPlot.pdf	0	0	NA	NA	NA	64.8361	0	Inf	up	8.1306e-16	3.55976e-15	yes	GO:0015630(microtubule cytoskeleton);GO:0005856(cytoskeleton);GO:0019001(guanyl nucleotide binding);GO:0099080(supramolecular complex);GO:0043226(organelle);GO:0007017(microtubule-based process);GO:0036094(small molecule binding);GO:0043228(non-membrane-bounded organelle);GO:0032555(purine ribonucleotide binding);GO:0016817(hydrolase activity, acting on acid anhydrides);GO:0044430(cytoskeletal pa…	ko04145(Phagosome)
PC-3p-12725_949	XM_016100476.1	137	158	149	-39.4	-27.6	0.700508	7.5	1-8,158-151;10-12,149-147;13-20,145-138	9-9,150-150[SIL];x-x,146-146[BULt];21-21,137-137[UP3]	.((((((((.(((.((((((((&)))))))).)))-)))))))).	UAGAGGUCACAGUGGAUGGGGA&UUCCCGUCGACU-UGAUCUCUC	0	0	NA	NA	NA	2	79.2048	2	0.393375	Output/R0h/cleaveLand_result/t_plot/PC-3p-12725_949_XM_016100476.1_149_TPlot.pdf	0	79.2048	-Inf	down	5.5905e-19	3.88279e-18	yes	GO:0044042(glucan metabolic process);GO:0008270(zinc ion binding);GO:0016740(transferase activity);GO:0033692(cellular polysaccharide biosynthetic process);GO:0071554(cell wall organization or biogenesis);GO:0043170(macromolecule metabolic process);GO:0000271(polysaccharide biosynthetic process);GO:0046914(transition metal ion binding);GO:0044464(cell part);GO:0031224(intrinsic component of membr…	NA
PC-3p-12725_949	XM_016102010.2	667	688	679	-39.4	-27.9	0.708122	6.5	1-10,688-679;11-11,677-677;13-19,675-669	x-x,678-678[BULt];12-12,676-676[SIL];20-21,668-667[UP3]	..(((((((.(.((((((((((&))))))))))-).)))))))..	UCGGGAUCACGUUCGACGGGAA&UUCCCGUCGA-CUUGAUCUCUC	4	129.672	2	0.360149	Output/R24h/cleaveLand_result/t_plot/PC-3p-12725_949_XM_016102010.2_679_TPlot.pdf	0	0	NA	NA	NA	129.672	0	Inf	up	4.813e-30	1.15989e-28	yes	NA	ko00500(Starch and sucrose metabolism);ko00940(Phenylpropanoid biosynthesis);ko00460(Cyanoamino acid metabolism);ko01100(Metabolic pathways);ko01110(Biosynthesis of secondary metabolites);ko04626(Plant-pathogen interaction);ko04016(MAPK signaling pathway - plant)
PC-3p-12725_949	XM_016102124.2	332	353	344	-39.4	-26	0.659898	7	1-3,353-351;4-9,349-344;11-15,343-339;17-21,336-332	x-x,350-350[BULt];10-10,x-x[BULq];16-16,338-337[AILt]	(((((..(((((-((((((.(((&)))-)))))).)))))-.)))))	GAGAGUCUCAAG-CGGCGGAGAA&UUC-CCGUCGACUUGA-UCUCUC	1	32.4181	4	0.999796	Output/R24h/cleaveLand_result/t_plot/PC-3p-12725_949_XM_016102124.2_344_TPlot.pdf	1	39.6024	4	0.998892	Output/R0h/cleaveLand_result/t_plot/PC-3p-12725_949_XM_016102124.2_344_TPlot.pdf	32.4181	39.6024	-0.28879	down	0.39723	0.398704	yes	NA	NA
PC-3p-12725_949	XM_016103754.2	815	835	826	-39.4	-26.8	0.680203	5.5	1-10,835-826;12-19,825-818;20-21,816-815	11-11,x-x[BULq];x-x,817-817[BULt]	((.((((((((-((((((((((&)))))))))).))))))))-))	GAUGAGGUCGA-UUGACGGGAG&UUCCCGUCGACUUGAUCUC-UC	1	32.4181	4	0.990345	Output/R24h/cleaveLand_result/t_plot/PC-3p-12725_949_XM_016103754.2_826_TPlot.pdf	2	79.2048	2	0.674331	Output/R0h/cleaveLand_result/t_plot/PC-3p-12725_949_XM_016103754.2_826_TPlot.pdf	32.4181	79.2048	-1.28879	down	9.4884e-06	1.04237e-05	yes	NA	NA
PC-3p-12725_949	XM_016104814.2	1706	1728	1718	-39.4	-26.9	0.682741	8.5	1-3,1728-1726;4-10,1724-1718;11-19,1716-1708	x-x,1725-1725[BULt];x-x,1717-1717[BULt];20-21,1707-1706[UP3]	..(((((((((.(((((((.(((&)))-)))))))-)))))))))..	CUGGGGUCGAGUUCGACGGCGGA&UUC-CCGUCGA-CUUGAUCUCUC	0	0	NA	NA	NA	1	39.6024	4	0.965459	Output/R0h/cleaveLand_result/t_plot/PC-3p-12725_949_XM_016104814.2_1718_TPlot.pdf	0	39.6024	-Inf	down	3.1118e-10	6.0515e-10	yes	GO:0010252(auxin homeostasis);GO:0048878(chemical homeostasis);GO:0060918(auxin transport);GO:0005886(plasma membrane);GO:0065007(biological regulation);GO:0048583(regulation of response to stimulus);GO:0031224(intrinsic component of membrane);GO:0022857(transmembrane transporter activity);GO:0044444(cytoplasmic part);GO:0005215(transporter activity);GO:0051179(localization);GO:0050794(regulation…	NA
PC-3p-12725_949	XM_016104862.2	399	421	410	-39.4	-27.4	0.695431	9.5	1-4,421-418;6-21,414-399	5-5,417-415[AILt]	((((((((((((((((...((((&))))--.))))))))))))))))	GGGAGGUCGGGUUGACACAGGAA&UUCC--CGUCGACUUGAUCUCUC	1	32.4181	4	0.908284	Output/R24h/cleaveLand_result/t_plot/PC-3p-12725_949_XM_016104862.2_410_TPlot.pdf	0	0	NA	NA	NA	32.4181	0	Inf	up	1.2429e-08	1.41251e-08	yes	NA	NA
PC-3p-12725_949	XM_016104966.2	105	126	116	-39.4	-26.2	0.664975	11	2-8,125-119;11-13,115-113;16-21,110-105	1-1,126-126[UP5];9-10,118-116[AILt];14-15,112-111[SIL]	((((((..(((...(((((((.&.)))))))-..)))..))))))	GAGAGGGAGAGGGAGGCGGGAG&UUCCCGUC-GACUUGAUCUCUC	0	0	NA	NA	NA	1	39.6024	4	0.995347	Output/R0h/cleaveLand_result/t_plot/PC-3p-12725_949_XM_016104966.2_116_TPlot.pdf	0	39.6024	-Inf	down	3.1118e-10	6.0515e-10	yes	GO:1901990(regulation of mitotic cell cycle phase transition);GO:0065007(biological regulation);GO:0050794(regulation of cellular process);GO:0043231(intracellular membrane-bounded organelle);GO:0051128(regulation of cellular component organization);GO:0044464(cell part);GO:0043229(intracellular organelle);GO:0044424(intracellular part);GO:0051783(regulation of nuclear division);GO:0043226(organe…	NA
PC-3p-12725_949	XM_016108390.2	1230	1248	1241	-39.4	-27.1	0.687817	8.5	3-6,1246-1243;8-9,1242-1241;11-21,1240-1230	1-2,1248-1247[UP5];7-7,x-x[BULq];10-10,x-x[BULq]	(((((((((((-((-((((..&..)))).)).)))))))))))	GAGAGGUCAGG-CG-CGGGCA&UUCCCGUCGACUUGAUCUCUC	1	32.4181	4	0.950674	Output/R24h/cleaveLand_result/t_plot/PC-3p-12725_949_XM_016108390.2_1241_TPlot.pdf	0	0	NA	NA	NA	32.4181	0	Inf	up	1.2429e-08	1.41251e-08	yes	GO:0048471(perinuclear region of cytoplasm);GO:0009816(defense response to bacterium, incompatible interaction);GO:0031348(negative regulation of defense response);GO:0065007(biological regulation);GO:0043227(membrane-bounded organelle);GO:0009605(response to external stimulus);GO:0043207(response to external biotic stimulus);GO:0045087(innate immune response);GO:0048519(negative regulation of bi…	ko00514(Other types of O-glycan biosynthesis)
PC-3p-12725_949	XM_016112267.2	1112	1134	1124	-39.4	-26.6	0.675127	7	2-3,1133-1132;4-6,1130-1128;8-15,1126-1119;16-21,1117-1112	1-1,1134-1134[UP5];x-x,1131-1131[BULt];7-7,1127-1127[SIL];x-x,1118-1118[BULt]	((((((.((((((((.(((.((.&.))-))).))))))))-))))))	GAGAGACUCAAGUUGUCGGAGAU&UUC-CCGUCGACUUGA-UCUCUC	0	0	NA	NA	NA	1	39.6024	4	0.991463	Output/R0h/cleaveLand_result/t_plot/PC-3p-12725_949_XM_016112267.2_1124_TPlot.pdf	0	39.6024	-Inf	down	3.1118e-10	6.0515e-10	yes	GO:0003824(catalytic activity);GO:0005488(binding);GO:0050662(coenzyme binding);GO:0048037(cofactor binding)	ko00040(Pentose and glucuronate interconversions);ko04120(Ubiquitin mediated proteolysis);ko01100(Metabolic pathways)
PC-3p-12725_949	XM_016112522.2	463	484	474	-39.4	-28.3	0.718274	5.5	1-8,484-477;9-13,475-471;16-21,468-463	x-x,476-476[BULt];14-15,470-469[SIL]	((((((..(((((.((((((((&))))))))-)))))..))))))	GAGAGGAGAAGUCAGGCGGGAA&UUCCCGUC-GACUUGAUCUCUC	2	64.8361	2	0.209123	Output/R24h/cleaveLand_result/t_plot/PC-3p-12725_949_XM_016112522.2_474_TPlot.pdf	2	79.2048	2	0.158163	Output/R0h/cleaveLand_result/t_plot/PC-3p-12725_949_XM_016112522.2_474_TPlot.pdf	64.8361	79.2048	-0.28879	down	0.2312	0.241796	yes	GO:0019222(regulation of metabolic process);GO:0031323(regulation of cellular metabolic process);GO:0043226(organelle);GO:0044464(cell part);GO:0060255(regulation of macromolecule metabolic process);GO:0003677(DNA binding);GO:0043231(intracellular membrane-bounded organelle);GO:0003676(nucleic acid binding);GO:0005488(binding);GO:2000112(regulation of cellular macromolecule biosynthetic process);…	ko04016(MAPK signaling pathway - plant)
PC-3p-12725_949	XM_016114539.2	781	802	792	-39.4	-25.9	0.65736	7.5	1-3,802-800;4-16,798-786;18-20,784-782	x-x,799-799[BULt];17-17,785-785[SIL];21-21,781-781[UP3]	.(((.(((((((((((((.(((&)))-))))))))))))).))).	UGGAAGUCGGGUCGGCGGUGAA&UUC-CCGUCGACUUGAUCUCUC	1	32.4181	4	0.999883	Output/R24h/cleaveLand_result/t_plot/PC-3p-12725_949_XM_016114539.2_792_TPlot.pdf	1	39.6024	4	0.999287	Output/R0h/cleaveLand_result/t_plot/PC-3p-12725_949_XM_016114539.2_792_TPlot.pdf	32.4181	39.6024	-0.28879	down	0.39723	0.398704	yes	GO:0003824(catalytic activity);GO:0008152(metabolic process);GO:0055114(oxidation-reduction process);GO:0016491(oxidoreductase activity)	ko01100(Metabolic pathways);ko00740(Riboflavin metabolism);ko01110(Biosynthesis of secondary metabolites)
PC-3p-12725_949	XM_016115111.2	1024	1046	1037	-39.4	-25.7	0.652284	8.5	1-11,1046-1036;14-18,1032-1028;19-20,1026-1025	12-13,1035-1033[AILt];x-x,1027-1027[BULt];21-21,1024-1024[UP3]	.((.(((((...(((((((((((&)))))))))))-..)))))-)).	CGGAAGAUCCUCGUCGGCGGGAA&UUCCCGUCGAC-UUGAUCU-CUC	1	32.4181	4	0.999967	Output/R24h/cleaveLand_result/t_plot/PC-3p-12725_949_XM_016115111.2_1037_TPlot.pdf	0	0	NA	NA	NA	32.4181	0	Inf	up	1.2429e-08	1.41251e-08	yes	GO:0006508(proteolysis);GO:0043170(macromolecule metabolic process);GO:0070011(peptidase activity, acting on L-amino acid peptides);GO:1901565(organonitrogen compound catabolic process);GO:0030163(protein catabolic process);GO:1901564(organonitrogen compound metabolic process);GO:0044238(primary metabolic process);GO:0006807(nitrogen compound metabolic process);GO:0008152(metabolic process);GO:00…	ko03010(Ribosome)
PC-3p-12725_949	XM_016116059.2	957	981	969	-39.4	-26.94	0.683756	10.5	1-9,981-973;11-15,968-964;16-21,962-957	10-10,972-969[AILt];x-x,963-963[BULt]	((((((.(((((....(((((((((&)))))))))---.)))))-))))))	GAGGGGCUCGAGAACGCGACGGGAA&UUCCCGUCG---ACUUGA-UCUCUC	0	0	NA	NA	NA	3	118.807	2	0.629957	Output/R0h/cleaveLand_result/t_plot/PC-3p-12725_949_XM_016116059.2_969_TPlot.pdf	0	118.807	-Inf	down	1.1501e-27	2.02633e-26	yes	GO:1901575(organic substance catabolic process);GO:0016787(hydrolase activity);GO:0071555(cell wall organization);GO:0016021(integral component of membrane);GO:0000272(polysaccharide catabolic process);GO:0010393(galacturonan metabolic process);GO:0045490(pectin catabolic process);GO:0016020(membrane);GO:0050790(regulation of catalytic activity);GO:0042545(cell wall modification);GO:0005976(polys…	ko00040(Pentose and glucuronate interconversions);ko01100(Metabolic pathways)
PC-3p-12725_949	XM_021134825.1	629	650	641	-39.4	-26	0.659898	9.5	2-11,649-640;14-19,636-631	1-1,650-650[UP5];12-13,639-637[AILt];20-21,630-629[UP3]	..((((((...((((((((((.&.))))))))))-..))))))..	CCGGGAUCCAUGUCGAUGGGAU&UUCCCGUCGAC-UUGAUCUCUC	0	0	NA	NA	NA	2	79.2048	2	0.865331	Output/R0h/cleaveLand_result/t_plot/PC-3p-12725_949_XM_021134825.1_641_TPlot.pdf	0	79.2048	-Inf	down	5.5905e-19	3.88279e-18	yes	GO:0032787(monocarboxylic acid metabolic process);GO:0044422(organelle part);GO:0008152(metabolic process);GO:0006090(pyruvate metabolic process);GO:0009532(plastid stroma);GO:0043226(organelle);GO:0044237(cellular metabolic process);GO:0006732(coenzyme metabolic process);GO:0006082(organic acid metabolic process);GO:0009526(plastid envelope);GO:0055114(oxidation-reduction process);GO:0035384(thi…	ko00010(Glycolysis / Gluconeogenesis);ko01110(Biosynthesis of secondary metabolites);ko00620(Pyruvate metabolism);ko00020(Citrate cycle (TCA cycle));ko01100(Metabolic pathways);ko01200(Carbon metabolism)
PC-3p-12725_949	XM_021135928.1	1134	1154	1145	-39.4	-28	0.71066	9	4-9,1151-1146;11-21,1144-1134	1-3,1154-1152[UP5];10-10,1145-1145[SIL]	(((((((((((.((((((...&...)))))).)))))))))))	GAGGGAUCGAGACGGCGGUGC&UUCCCGUCGACUUGAUCUCUC	0	0	NA	NA	NA	1	39.6024	4	0.608573	Output/R0h/cleaveLand_result/t_plot/PC-3p-12725_949_XM_021135928.1_1145_TPlot.pdf	0	39.6024	-Inf	down	3.1118e-10	6.0515e-10	yes	NA	NA
PC-3p-12911_938	BGI_novel_T001351	1396	1406	1397	-28.7	-19.4	0.675958	3	12-21,1405-1396	11-11,1406-1406[SIL]	((((((((((.&.))))))))))	GCUGAGCUGCG&UUUUUAAUUAA	0	0	NA	NA	NA	1	39.6024	4	0.999998	Output/R0h/cleaveLand_result/t_plot/PC-3p-12911_938_BGI_novel_T001351_1397_TPlot.pdf	0	39.6024	-Inf	down	3.1118e-10	6.0515e-10	yes	NA	ko04070(Phosphatidylinositol signaling system);ko01100(Metabolic pathways);ko01110(Biosynthesis of secondary metabolites);ko00564(Glycerophospholipid metabolism);ko00561(Glycerolipid metabolism)
PC-3p-12911_938	BGI_novel_T004127	1589	1610	1600	-28.7	-18.7	0.651568	13	2-9,1609-1602;14-21,1596-1589	1-1,1610-1610[UP5];10-13,1601-1597[AILt]	((((((((.....((((((((.&.))))))))-....))))))))	GCUGAGCUUGGAGAGUUGAAGC&UUUUUAAUU-AAGUAGCUCAGC	1	32.4181	4	1	Output/R24h/cleaveLand_result/t_plot/PC-3p-12911_938_BGI_novel_T004127_1600_TPlot.pdf	0	0	NA	NA	NA	32.4181	0	Inf	up	1.2429e-08	1.41251e-08	yes	GO:0003723(RNA binding);GO:0097159(organic cyclic compound binding);GO:0003676(nucleic acid binding);GO:1901265(nucleoside phosphate binding);GO:0000166(nucleotide binding);GO:0005488(binding);GO:0036094(small molecule binding);GO:1901363(heterocyclic compound binding)	ko03013(RNA transport);ko03040(Spliceosome);ko03015(mRNA surveillance pathway)
PC-3p-12911_938	BGI_novel_T004463	1169	1195	1186	-28.7	-19.2	0.66899	13.5	1-10,1195-1186;11-17,1181-1175;18-21,1172-1169	x-x,1185-1182[BULt];x-x,1174-1173[BULt]	((((..(((((((....((((((((((&))))))))))----)))))))--))))	GCUGCAAGCUGCUGUCCUAGUUAGAGA&UUUUUAAUUA----AGUAGCU--CAGC	1	32.4181	4	1	Output/R24h/cleaveLand_result/t_plot/PC-3p-12911_938_BGI_novel_T004463_1186_TPlot.pdf	0	0	NA	NA	NA	32.4181	0	Inf	up	1.2429e-08	1.41251e-08	yes	GO:0015031(protein transport);GO:0051641(cellular localization);GO:0006614(SRP-dependent cotranslational protein targeting to membrane);GO:0034613(cellular protein localization);GO:0046907(intracellular transport);GO:0044424(intracellular part);GO:0045047(protein targeting to ER);GO:0071702(organic substance transport);GO:0005622(intracellular);GO:0072599(establishment of protein localization to …	ko03060(Protein export)
PC-3p-12911_938	BGI_novel_T006280	815	835	826	-28.7	-18.8	0.655052	15.5	8-16,828-820;18-21,818-815	1-7,835-829[UP5];17-17,819-819[SIL]	((((.(((((((((.......&.......))))))))).))))	GCUGUGCUGCUUGACAACGAA&UUUUUAAUUAAGUAGCUCAGC	1	32.4181	4	1	Output/R24h/cleaveLand_result/t_plot/PC-3p-12911_938_BGI_novel_T006280_826_TPlot.pdf	0	0	NA	NA	NA	32.4181	0	Inf	up	1.2429e-08	1.41251e-08	yes	GO:0043168(anion binding);GO:0003824(catalytic activity);GO:0032549(ribonucleoside binding);GO:0043232(intracellular non-membrane-bounded organelle);GO:0005198(structural molecule activity);GO:0016818(hydrolase activity, acting on acid anhydrides, in phosphorus-containing anhydrides);GO:0044424(intracellular part);GO:1901265(nucleoside phosphate binding);GO:0032553(ribonucleotide binding);GO:0044…	ko04145(Phagosome)
PC-3p-12911_938	BGI_novel_T007390	1160	1180	1171	-28.7	-19.5	0.679443	6.5	1-6,1180-1175;8-9,1173-1172;11-21,1170-1160	7-7,1174-1174[SIL];10-10,1171-1171[SIL]	(((((((((((.((.((((((&)))))).)).)))))))))))	GCUGAGUUACUCAAAUGGAAA&UUUUUAAUUAAGUAGCUCAGC	0	0	NA	NA	NA	1	39.6024	4	0.999986	Output/R0h/cleaveLand_result/t_plot/PC-3p-12911_938_BGI_novel_T007390_1171_TPlot.pdf	0	39.6024	-Inf	down	3.1118e-10	6.0515e-10	yes	GO:0005622(intracellular);GO:0007154(cell communication);GO:0044464(cell part);GO:0051345(positive regulation of hydrolase activity);GO:0043085(positive regulation of catalytic activity);GO:0050896(response to stimulus);GO:0065007(biological regulation);GO:0050794(regulation of cellular process);GO:0005623(cell);GO:0007264(small GTPase mediated signal transduction);GO:0065009(regulation of molecu…	NA
PC-3p-12911_938	BGI_novel_T007391	1120	1140	1131	-28.7	-19.5	0.679443	6.5	1-6,1140-1135;8-9,1133-1132;11-21,1130-1120	7-7,1134-1134[SIL];10-10,1131-1131[SIL]	(((((((((((.((.((((((&)))))).)).)))))))))))	GCUGAGUUACUCAAAUGGAAA&UUUUUAAUUAAGUAGCUCAGC	0	0	NA	NA	NA	1	39.6024	4	0.99999	Output/R0h/cleaveLand_result/t_plot/PC-3p-12911_938_BGI_novel_T007391_1131_TPlot.pdf	0	39.6024	-Inf	down	3.1118e-10	6.0515e-10	yes	GO:0005622(intracellular);GO:0007154(cell communication);GO:0044464(cell part);GO:0051345(positive regulation of hydrolase activity);GO:0043085(positive regulation of catalytic activity);GO:0050896(response to stimulus);GO:0065007(biological regulation);GO:0050794(regulation of cellular process);GO:0005623(cell);GO:0007264(small GTPase mediated signal transduction);GO:0065009(regulation of molecu…	NA
PC-3p-12911_938	BGI_novel_T010483	1402	1424	1414	-28.7	-18.7	0.651568	8.5	2-9,1423-1416;11-12,1413-1412;13-21,1410-1402	1-1,1424-1424[UP5];10-10,1415-1414[AILt];x-x,1411-1411[BULt]	(((((((((.((..((((((((.&.))))))))-.))-)))))))))	GCUGAGUUAUCUGAAGUUAAAAG&UUUUUAAUU-AAG-UAGCUCAGC	1	32.4181	4	1	Output/R24h/cleaveLand_result/t_plot/PC-3p-12911_938_BGI_novel_T010483_1414_TPlot.pdf	0	0	NA	NA	NA	32.4181	0	Inf	up	1.2429e-08	1.41251e-08	yes	GO:0071704(organic substance metabolic process);GO:1901564(organonitrogen compound metabolic process);GO:0044237(cellular metabolic process);GO:0003824(catalytic activity);GO:0019538(protein metabolic process);GO:0009987(cellular process);GO:0044267(cellular protein metabolic process);GO:0042578(phosphoric ester hydrolase activity);GO:0006470(protein dephosphorylation);GO:0006464(cellular protein…	NA
PC-3p-12911_938	BGI_novel_T011351	702	727	718	-28.7	-20.3	0.707317	7	1-12,727-716;13-17,714-710;18-21,705-702	x-x,715-715[BULt];x-x,709-706[BULt]	((((....(((((.((((((((((((&))))))))))))-)))))----))))	GCUGGAACAGCUAUCUUAAUUAAGAA&UUUUUAAUUAAG-UAGCU----CAGC	0	0	NA	NA	NA	1	39.6024	4	0.996658	Output/R0h/cleaveLand_result/t_plot/PC-3p-12911_938_BGI_novel_T011351_718_TPlot.pdf	0	39.6024	-Inf	down	3.1118e-10	6.0515e-10	yes	GO:0005737(cytoplasm);GO:0043229(intracellular organelle);GO:0016020(membrane);GO:0005777(peroxisome);GO:0006996(organelle organization);GO:0044464(cell part);GO:0043231(intracellular membrane-bounded organelle);GO:0016043(cellular component organization);GO:0071840(cellular component organization or biogenesis);GO:0043226(organelle);GO:0005623(cell);GO:0044444(cytoplasmic part);GO:0044424(intrac…	ko04146(Peroxisome)
PC-3p-12911_938	BGI_novel_T012479	841	864	855	-28.7	-19.9	0.69338	9	3-16,862-849;17-21,845-841	1-2,864-863[UP5];x-x,848-846[BULt]	(((((...((((((((((((((..&..))))))))))))))---)))))	GCUGAUCGGUUGCUUAAUUGGAUC&UUUUUAAUUAAGUAGC---UCAGC	0	0	NA	NA	NA	1	39.6024	4	0.999418	Output/R0h/cleaveLand_result/t_plot/PC-3p-12911_938_BGI_novel_T012479_855_TPlot.pdf	0	39.6024	-Inf	down	3.1118e-10	6.0515e-10	yes	GO:0050794(regulation of cellular process);GO:0016972(thiol oxidase activity);GO:0065008(regulation of biological quality);GO:0042592(homeostatic process);GO:0055114(oxidation-reduction process);GO:0031224(intrinsic component of membrane);GO:0016020(membrane);GO:0016021(integral component of membrane);GO:0009987(cellular process);GO:0065007(biological regulation);GO:0050789(regulation of biologic…	NA
PC-3p-12911_938	XM_016076656.2	820	840	831	-28.7	-20.2	0.703833	7	2-5,839-836;8-13,833-828;15-21,826-820	1-1,840-840[UP5];6-7,835-834[SIL];14-14,827-827[SIL]	(((((((.((((((..((((.&.))))..)))))).)))))))	GCUGAGCAACUUAAGAAGAAG&UUUUUAAUUAAGUAGCUCAGC	0	0	NA	NA	NA	2	79.2048	2	0.838242	Output/R0h/cleaveLand_result/t_plot/PC-3p-12911_938_XM_016076656.2_831_TPlot.pdf	0	79.2048	-Inf	down	5.5905e-19	3.88279e-18	yes	GO:0046872(metal ion binding);GO:0051234(establishment of localization);GO:0006811(ion transport);GO:0005488(binding);GO:0030001(metal ion transport);GO:0051179(localization);GO:0006810(transport);GO:0043169(cation binding);GO:0043167(ion binding);GO:0006812(cation transport)	NA
PC-3p-12911_938	XM_016079084.2	753	775	765	-28.7	-20.1	0.700348	11.5	1-8,775-768;11-16,764-759;17-21,757-753	9-10,767-765[AILt];x-x,758-758[BULt]	(((((.((((((...((((((((&))))))))-..))))))-)))))	GCUGGUGCUACUGCUGUUGAGGA&UUUUUAAU-UAAGUAGC-UCAGC	0	0	NA	NA	NA	1	39.6024	4	0.998716	Output/R0h/cleaveLand_result/t_plot/PC-3p-12911_938_XM_016079084.2_765_TPlot.pdf	0	39.6024	-Inf	down	3.1118e-10	6.0515e-10	yes	GO:0016684(oxidoreductase activity, acting on peroxide as acceptor);GO:0003824(catalytic activity);GO:1901363(heterocyclic compound binding);GO:0016491(oxidoreductase activity);GO:0042221(response to chemical);GO:0009636(response to toxic substance);GO:1990748(cellular detoxification);GO:0098754(detoxification);GO:0004601(peroxidase activity);GO:0050896(response to stimulus);GO:0046906(tetrapyrro…	ko00053(Ascorbate and aldarate metabolism);ko00480(Glutathione metabolism)
PC-3p-12911_938	XM_016079933.2	608	629	620	-28.7	-18.9	0.658537	8	2-18,628-612;19-21,610-608	1-1,629-629[UP5];x-x,611-611[BULt]	(((.(((((((((((((((((.&.)))))))))))))))))-)))	GUUGGGGUUGCUUGGUUAAGGG&UUUUUAAUUAAGUAGCUC-AGC	0	0	NA	NA	NA	1	39.6024	4	1	Output/R0h/cleaveLand_result/t_plot/PC-3p-12911_938_XM_016079933.2_620_TPlot.pdf	0	39.6024	-Inf	down	3.1118e-10	6.0515e-10	yes	GO:0003676(nucleic acid binding);GO:0005488(binding);GO:0097159(organic cyclic compound binding);GO:1901363(heterocyclic compound binding);GO:0003723(RNA binding)	NA
PC-3p-12911_938	XM_016081194.2	3907	3928	3918	-28.7	-21.9	0.763066	9	3-8,3926-3921;10-21,3918-3907	1-2,3928-3927[UP5];9-9,3920-3919[AILt]	((((((((((((..((((((..&..))))))-.))))))))))))	GCUGGGCUGCUUCCAUUAGAUU&UUUUUAAU-UAAGUAGCUCAGC	0	0	NA	NA	NA	1	39.6024	4	0.444852	Output/R0h/cleaveLand_result/t_plot/PC-3p-12911_938_XM_016081194.2_3918_TPlot.pdf	0	39.6024	-Inf	down	3.1118e-10	6.0515e-10	yes	GO:0006189('de novo' IMP biosynthetic process);GO:0006753(nucleoside phosphate metabolic process);GO:0016879(ligase activity, forming carbon-nitrogen bonds);GO:0009167(purine ribonucleoside monophosphate metabolic process);GO:0009161(ribonucleoside monophosphate metabolic process);GO:1901137(carbohydrate derivative biosynthetic process);GO:0006793(phosphorus metabolic process);GO:0009126(purine n…	ko01110(Biosynthesis of secondary metabolites);ko01100(Metabolic pathways);ko00230(Purine metabolism)
PC-3p-12911_938	XM_016082824.2	714	739	730	-28.7	-20.3	0.707317	7	1-12,739-728;13-17,726-722;18-21,717-714	x-x,727-727[BULt];x-x,721-718[BULt]	((((....(((((.((((((((((((&))))))))))))-)))))----))))	GCUGGAACAGCUAUCUUAAUUAAGAA&UUUUUAAUUAAG-UAGCU----CAGC	0	0	NA	NA	NA	1	39.6024	4	0.995833	Output/R0h/cleaveLand_result/t_plot/PC-3p-12911_938_XM_016082824.2_730_TPlot.pdf	0	39.6024	-Inf	down	3.1118e-10	6.0515e-10	yes	GO:0005737(cytoplasm);GO:0043229(intracellular organelle);GO:0016020(membrane);GO:0005777(peroxisome);GO:0006996(organelle organization);GO:0044464(cell part);GO:0043231(intracellular membrane-bounded organelle);GO:0016043(cellular component organization);GO:0071840(cellular component organization or biogenesis);GO:0043226(organelle);GO:0005623(cell);GO:0044444(cytoplasmic part);GO:0044424(intrac…	ko04146(Peroxisome)
PC-3p-12911_938	XM_016083411.2	2109	2119	2110	-28.7	-19.3	0.672474	2	12-21,2118-2109	11-11,2119-2119[SIL]	((((((((((.&.))))))))))	GCUGAGCUACA&UUUUUAAUUAA	1	32.4181	4	1	Output/R24h/cleaveLand_result/t_plot/PC-3p-12911_938_XM_016083411.2_2110_TPlot.pdf	1	39.6024	4	0.999999	Output/R0h/cleaveLand_result/t_plot/PC-3p-12911_938_XM_016083411.2_2110_TPlot.pdf	32.4181	39.6024	-0.28879	down	0.39723	0.398704	yes	GO:0043933(macromolecular complex subunit organization);GO:0071840(cellular component organization or biogenesis);GO:0005819(spindle);GO:0005737(cytoplasm);GO:0097435(supramolecular fiber organization);GO:0007010(cytoskeleton organization);GO:0099081(supramolecular polymer);GO:0065003(macromolecular complex assembly);GO:0000922(spindle pole);GO:0044430(cytoskeletal part);GO:0005815(microtubule or…	NA
PC-3p-12911_938	XM_016084585.2	997	1019	1009	-28.7	-20.4	0.710801	8.5	2-9,1018-1011;11-17,1008-1002;18-21,1000-997	1-1,1019-1019[UP5];10-10,1010-1009[AILt];x-x,1001-1001[BULt]	((((.(((((((..((((((((.&.))))))))-.)))))))-))))	GCUGCAGCUGCUGCAAUUAGGAU&UUUUUAAUU-AAGUAGCU-CAGC	3	97.2542	2	0.864392	Output/R24h/cleaveLand_result/t_plot/PC-3p-12911_938_XM_016084585.2_1009_TPlot.pdf	0	0	NA	NA	NA	97.2542	0	Inf	up	6.0829e-23	7.372e-22	yes	GO:0004124(cysteine synthase activity);GO:1901564(organonitrogen compound metabolic process);GO:0006535(cysteine biosynthetic process from serine);GO:0044272(sulfur compound biosynthetic process);GO:0019752(carboxylic acid metabolic process);GO:0006807(nitrogen compound metabolic process);GO:0016829(lyase activity);GO:0044283(small molecule biosynthetic process);GO:0044281(small molecule metaboli…	ko00270(Cysteine and methionine metabolism);ko01200(Carbon metabolism);ko01110(Biosynthesis of secondary metabolites);ko01100(Metabolic pathways);ko01230(Biosynthesis of amino acids);ko00920(Sulfur metabolism)
PC-3p-12911_938	XM_016084586.2	1019	1041	1031	-28.7	-20.4	0.710801	8.5	2-9,1040-1033;11-17,1030-1024;18-21,1022-1019	1-1,1041-1041[UP5];10-10,1032-1031[AILt];x-x,1023-1023[BULt]	((((.(((((((..((((((((.&.))))))))-.)))))))-))))	GCUGCAGCUGCUGCAAUUAGGAU&UUUUUAAUU-AAGUAGCU-CAGC	1	32.4181	4	0.997831	Output/R24h/cleaveLand_result/t_plot/PC-3p-12911_938_XM_016084586.2_1031_TPlot.pdf	0	0	NA	NA	NA	32.4181	0	Inf	up	1.2429e-08	1.41251e-08	yes	GO:0004124(cysteine synthase activity);GO:1901564(organonitrogen compound metabolic process);GO:0006535(cysteine biosynthetic process from serine);GO:0044272(sulfur compound biosynthetic process);GO:0019752(carboxylic acid metabolic process);GO:0006807(nitrogen compound metabolic process);GO:0016829(lyase activity);GO:0044283(small molecule biosynthetic process);GO:0044281(small molecule metaboli…	ko00270(Cysteine and methionine metabolism);ko01200(Carbon metabolism);ko01110(Biosynthesis of secondary metabolites);ko01100(Metabolic pathways);ko01230(Biosynthesis of amino acids);ko00920(Sulfur metabolism)
PC-3p-12911_938	XM_016085812.2	1084	1103	1095	-28.7	-22	0.766551	9	1-8,1103-1096;12-21,1093-1084	9-11,1095-1094[AILq]	((((((((((..-((((((((&))))))))...))))))))))	GCUGAGCUACCU-AUUGAGGA&UUUUUAAUUAAGUAGCUCAGC	1	32.4181	4	0.486334	Output/R24h/cleaveLand_result/t_plot/PC-3p-12911_938_XM_016085812.2_1095_TPlot.pdf	0	0	NA	NA	NA	32.4181	0	Inf	up	1.2429e-08	1.41251e-08	yes	GO:0009126(purine nucleoside monophosphate metabolic process);GO:1901564(organonitrogen compound metabolic process);GO:0044281(small molecule metabolic process);GO:0006725(cellular aromatic compound metabolic process);GO:0006796(phosphate-containing compound metabolic process);GO:0006091(generation of precursor metabolites and energy);GO:0000287(magnesium ion binding);GO:0006753(nucleoside phosph…	ko01100(Metabolic pathways);ko00620(Pyruvate metabolism);ko00010(Glycolysis / Gluconeogenesis);ko01200(Carbon metabolism);ko01230(Biosynthesis of amino acids);ko00230(Purine metabolism);ko01110(Biosynthesis of secondary metabolites)
PC-3p-12911_938	XM_016086230.2	841	864	855	-28.7	-19.9	0.69338	9	3-16,862-849;17-21,845-841	1-2,864-863[UP5];x-x,848-846[BULt]	(((((...((((((((((((((..&..))))))))))))))---)))))	GCUGAUCGGUUGCUUAAUUGGAUC&UUUUUAAUUAAGUAGC---UCAGC	0	0	NA	NA	NA	1	39.6024	4	0.999362	Output/R0h/cleaveLand_result/t_plot/PC-3p-12911_938_XM_016086230.2_855_TPlot.pdf	0	39.6024	-Inf	down	3.1118e-10	6.0515e-10	yes	GO:0050794(regulation of cellular process);GO:0016972(thiol oxidase activity);GO:0065008(regulation of biological quality);GO:0042592(homeostatic process);GO:0055114(oxidation-reduction process);GO:0031224(intrinsic component of membrane);GO:0016020(membrane);GO:0016021(integral component of membrane);GO:0009987(cellular process);GO:0065007(biological regulation);GO:0050789(regulation of biologic…	NA
PC-3p-12911_938	XM_016086461.2	3691	3712	3702	-28.7	-18.9	0.658537	10.5	1-6,3712-3707;9-21,3703-3691	7-8,3706-3704[AILt]	(((((((((((((...((((((&))))))-..)))))))))))))	GUUGAGCUAUUUAUUGUGAGGA&UUUUUA-AUUAAGUAGCUCAGC	0	0	NA	NA	NA	1	39.6024	4	1	Output/R0h/cleaveLand_result/t_plot/PC-3p-12911_938_XM_016086461.2_3702_TPlot.pdf	0	39.6024	-Inf	down	3.1118e-10	6.0515e-10	yes	GO:0071704(organic substance metabolic process);GO:0044389(ubiquitin-like protein ligase binding);GO:0019538(protein metabolic process);GO:0005622(intracellular);GO:0003824(catalytic activity);GO:0016740(transferase activity);GO:0044424(intracellular part);GO:0036211(protein modification process);GO:0019899(enzyme binding);GO:0031625(ubiquitin protein ligase binding);GO:0070647(protein modificati…	ko04120(Ubiquitin mediated proteolysis)
PC-3p-12911_938	XM_016086511.1	815	837	828	-28.7	-21.3	0.74216	10	4-16,834-822;17-21,819-815	1-3,837-835[UP5];x-x,821-820[BULt]	(((((..(((((((((((((...&...)))))))))))))--)))))	GCUGAUAGCUACUUGGUUAGCUC&UUUUUAAUUAAGUAGC--UCAGC	6	194.508	2	0.388554	Output/R24h/cleaveLand_result/t_plot/PC-3p-12911_938_XM_016086511.1_828_TPlot.pdf	3	118.807	3	0.0875919	Output/R0h/cleaveLand_result/t_plot/PC-3p-12911_938_XM_016086511.1_828_TPlot.pdf	194.508	118.807	0.71121	up	1.8937e-05	2.07792e-05	yes	GO:0043167(ion binding);GO:0008270(zinc ion binding);GO:0052747(sinapyl alcohol dehydrogenase activity);GO:0008152(metabolic process);GO:0016616(oxidoreductase activity, acting on the CH-OH group of donors, NAD or NADP as acceptor);GO:0043169(cation binding);GO:0016614(oxidoreductase activity, acting on CH-OH group of donors);GO:0046914(transition metal ion binding);GO:0016491(oxidoreductase acti…	ko01100(Metabolic pathways);ko00940(Phenylpropanoid biosynthesis);ko01110(Biosynthesis of secondary metabolites)
PC-3p-12911_938	XM_016087626.2	497	518	509	-28.7	-20.2	0.703833	8.5	1-5,518-514;7-18,512-501;20-21,498-497	6-6,513-513[SIL];19-19,500-499[AILt]	((..((((((((((((.(((((&))))).))))))))))))-.))	GCCGGAGCUGCUUGAUGAGGGA&UUUUUAAUUAAGUAGCUC-AGC	1	32.4181	4	0.999401	Output/R24h/cleaveLand_result/t_plot/PC-3p-12911_938_XM_016087626.2_509_TPlot.pdf	0	0	NA	NA	NA	32.4181	0	Inf	up	1.2429e-08	1.41251e-08	yes	NA	NA
PC-3p-12911_938	XM_016088695.2	1039	1059	1050	-28.7	-19.6	0.682927	16.5	9-21,1051-1039	1-8,1059-1052[UP5]	(((((((((((((........&........)))))))))))))	GCUGAGUUACUUGCAGAUGAG&UUUUUAAUUAAGUAGCUCAGC	0	0	NA	NA	NA	2	79.2048	2	0.953894	Output/R0h/cleaveLand_result/t_plot/PC-3p-12911_938_XM_016088695.2_1050_TPlot.pdf	0	79.2048	-Inf	down	5.5905e-19	3.88279e-18	yes	GO:0032301(MutSalpha complex);GO:0043234(protein complex);GO:1990391(DNA repair complex);GO:0006139(nucleobase-containing compound metabolic process);GO:0007127(meiosis I);GO:0005694(chromosome);GO:0006310(DNA recombination);GO:0019219(regulation of nucleobase-containing compound metabolic process);GO:0043228(non-membrane-bounded organelle);GO:0006725(cellular aromatic compound metabolic process)…	ko03430(Mismatch repair)
PC-3p-12911_938	XM_016095046.2	1310	1329	1320	-28.7	-20.4	0.710801	6	1-12,1329-1318;15-21,1316-1310	13-14,1317-1317[AILq]	(((((((.-((((((((((((&))))))))))))..)))))))	GCUGAGCC-UUUGAUUGAAGA&UUUUUAAUUAAGUAGCUCAGC	0	0	NA	NA	NA	3	118.807	2	0.775522	Output/R0h/cleaveLand_result/t_plot/PC-3p-12911_938_XM_016095046.2_1320_TPlot.pdf	0	118.807	-Inf	down	1.1501e-27	2.02633e-26	yes	GO:0008168(methyltransferase activity);GO:0003824(catalytic activity);GO:0016741(transferase activity, transferring one-carbon groups);GO:0008152(metabolic process);GO:0016740(transferase activity);GO:0032259(methylation);GO:0016021(integral component of membrane);GO:0044425(membrane part);GO:0031224(intrinsic component of membrane);GO:0016020(membrane)	NA
PC-3p-12911_938	XM_016096014.2	978	1002	993	-28.7	-19.3	0.672474	11	1-6,1002-997;9-16,994-987;17-21,982-978	7-8,996-995[SIL];x-x,986-983[BULt]	(((((....((((((((..((((((&))))))..))))))))----)))))	GCUGGUAUUGCUGCUUAUGUGAAGA&UUUUUAAUUAAGUAGC----UCAGC	1	32.4181	4	1	Output/R24h/cleaveLand_result/t_plot/PC-3p-12911_938_XM_016096014.2_993_TPlot.pdf	0	0	NA	NA	NA	32.4181	0	Inf	up	1.2429e-08	1.41251e-08	yes	GO:0008652(cellular amino acid biosynthetic process);GO:1901605(alpha-amino acid metabolic process);GO:0019842(vitamin binding);GO:0006520(cellular amino acid metabolic process);GO:1901576(organic substance biosynthetic process);GO:0005488(binding);GO:0043168(anion binding);GO:0044238(primary metabolic process);GO:0009097(isoleucine biosynthetic process);GO:1901607(alpha-amino acid biosynthetic p…	ko01100(Metabolic pathways);ko00260(Glycine, serine and threonine metabolism);ko01200(Carbon metabolism);ko01110(Biosynthesis of secondary metabolites);ko01230(Biosynthesis of amino acids);ko00290(Valine, leucine and isoleucine biosynthesis)
PC-3p-12911_938	XM_016096457.2	1794	1819	1810	-28.7	-18.8	0.655052	12	2-13,1818-1807;14-21,1801-1794	1-1,1819-1819[UP5];x-x,1806-1802[BULt]	((((((((.....((((((((((((.&.))))))))))))-----))))))))	GUUGGGCUUCAGUACUUGGUUGAGGC&UUUUUAAUUAAGU-----AGCUCAGC	2	64.8361	3	0.896867	Output/R24h/cleaveLand_result/t_plot/PC-3p-12911_938_XM_016096457.2_1810_TPlot.pdf	0	0	NA	NA	NA	64.8361	0	Inf	up	8.1306e-16	3.55976e-15	yes	GO:0016830(carbon-carbon lyase activity);GO:0009445(putrescine metabolic process);GO:0009056(catabolic process);GO:0003824(catalytic activity);GO:0044237(cellular metabolic process);GO:0006596(polyamine biosynthetic process);GO:0006595(polyamine metabolic process);GO:0006525(arginine metabolic process);GO:0044281(small molecule metabolic process);GO:0044249(cellular biosynthetic process);GO:19015…	ko01100(Metabolic pathways);ko00330(Arginine and proline metabolism)
PC-3p-12911_938	XM_016097338.2	895	920	907	-28.7	-19.66	0.685017	15.5	1-6,920-915;9-14,908-903;15-21,901-895	7-8,914-909[AILt];x-x,902-902[BULt]	(((((((.((((((......((((((&))))))----..))))))-)))))))	GCUGAGCUUGCUUAUGUGGGUGAAGA&UUUUUA----AUUAAGUA-GCUCAGC	0	0	NA	NA	NA	1	39.6024	4	0.99994	Output/R0h/cleaveLand_result/t_plot/PC-3p-12911_938_XM_016097338.2_907_TPlot.pdf	0	39.6024	-Inf	down	3.1118e-10	6.0515e-10	yes	GO:0005355(glucose transmembrane transporter activity);GO:0005215(transporter activity);GO:1904659(glucose transmembrane transport);GO:0015749(monosaccharide transport);GO:0005623(cell);GO:0055085(transmembrane transport);GO:0015144(carbohydrate transmembrane transporter activity);GO:0005402(cation:sugar symporter activity);GO:0015294(solute:cation symporter activity);GO:0015075(ion transmembrane…	NA
PC-3p-12911_938	XM_016100158.2	988	1008	999	-28.7	-19.04	0.663415	12.5	1-5,1008-1004;11-21,998-988	6-10,1003-999[SIL]	(((((((((((.....(((((&))))).....)))))))))))	GCUGAGUUACUCGAAGGAGAA&UUUUUAAUUAAGUAGCUCAGC	2	64.8361	3	0.839062	Output/R24h/cleaveLand_result/t_plot/PC-3p-12911_938_XM_016100158.2_999_TPlot.pdf	0	0	NA	NA	NA	64.8361	0	Inf	up	8.1306e-16	3.55976e-15	yes	NA	NA
PC-3p-12911_938	XM_016101256.2	736	757	747	-28.7	-18.7	0.651568	13	2-9,756-749;14-21,743-736	1-1,757-757[UP5];10-13,748-744[AILt]	((((((((.....((((((((.&.))))))))-....))))))))	GCUGAGCUUGGAGAGUUGAAGC&UUUUUAAUU-AAGUAGCUCAGC	0	0	NA	NA	NA	1	39.6024	4	1	Output/R0h/cleaveLand_result/t_plot/PC-3p-12911_938_XM_016101256.2_747_TPlot.pdf	0	39.6024	-Inf	down	3.1118e-10	6.0515e-10	yes	GO:0003723(RNA binding);GO:0097159(organic cyclic compound binding);GO:0003676(nucleic acid binding);GO:1901265(nucleoside phosphate binding);GO:0000166(nucleotide binding);GO:0005488(binding);GO:0036094(small molecule binding);GO:1901363(heterocyclic compound binding)	ko03013(RNA transport);ko03040(Spliceosome);ko03015(mRNA surveillance pathway)
PC-3p-12911_938	XM_016103522.2	1860	1880	1871	-28.7	-19.2	0.66899	16.5	9-21,1872-1860	1-8,1880-1873[UP5]	(((((((((((((........&........)))))))))))))	GCUGGGCUAUUUAUGGAAUUC&UUUUUAAUUAAGUAGCUCAGC	0	0	NA	NA	NA	1	39.6024	4	1	Output/R0h/cleaveLand_result/t_plot/PC-3p-12911_938_XM_016103522.2_1871_TPlot.pdf	0	39.6024	-Inf	down	3.1118e-10	6.0515e-10	yes	GO:1901565(organonitrogen compound catabolic process);GO:0044238(primary metabolic process);GO:0006508(proteolysis);GO:0019787(ubiquitin-like protein transferase activity);GO:0036211(protein modification process);GO:0005622(intracellular);GO:0009987(cellular process);GO:0019941(modification-dependent protein catabolic process);GO:0044248(cellular catabolic process);GO:0016740(transferase activity…	ko04120(Ubiquitin mediated proteolysis);ko04144(Endocytosis)
PC-3p-12911_938	XM_016103644.2	154	176	165	-28.7	-19.26	0.67108	14	1-6,176-171;10-21,165-154	7-9,170-166[AILt]	((((((((((((.....((((((&))))))--...))))))))))))	GCUGAGUUGCUUCUUUGUGGGAA&UUUUUA--AUUAAGUAGCUCAGC	0	0	NA	NA	NA	2	79.2048	2	0.987976	Output/R0h/cleaveLand_result/t_plot/PC-3p-12911_938_XM_016103644.2_165_TPlot.pdf	0	79.2048	-Inf	down	5.5905e-19	3.88279e-18	yes	GO:0004672(protein kinase activity);GO:0016772(transferase activity, transferring phosphorus-containing groups);GO:0050896(response to stimulus);GO:0005623(cell);GO:0043231(intracellular membrane-bounded organelle);GO:0043168(anion binding);GO:0032555(purine ribonucleotide binding);GO:0032553(ribonucleotide binding);GO:0006796(phosphate-containing compound metabolic process);GO:0019538(protein me…	NA
PC-3p-12911_938	XM_016103878.2	530	550	541	-28.7	-19	0.662021	13	6-11,545-540;14-21,537-530	1-5,550-546[UP5];12-13,539-538[SIL]	((((((((..((((((.....&.....))))))..))))))))	GCUGAGCUUAUUGAUUCCGUU&UUUUUAAUUAAGUAGCUCAGC	0	0	NA	NA	NA	3	118.807	2	0.994626	Output/R0h/cleaveLand_result/t_plot/PC-3p-12911_938_XM_016103878.2_541_TPlot.pdf	0	118.807	-Inf	down	1.1501e-27	2.02633e-26	yes	GO:0097367(carbohydrate derivative binding);GO:0005200(structural constituent of cytoskeleton);GO:0016817(hydrolase activity, acting on acid anhydrides);GO:0016462(pyrophosphatase activity);GO:0032553(ribonucleotide binding);GO:0001883(purine nucleoside binding);GO:0005737(cytoplasm);GO:0017111(nucleoside-triphosphatase activity);GO:0044464(cell part);GO:0005622(intracellular);GO:0005874(microtub…	ko04145(Phagosome)
PC-3p-12911_938	XM_016106983.2	53	77	68	-28.7	-19.3	0.672474	11	1-10,77-68;11-19,64-56;20-21,54-53	x-x,67-65[BULt];x-x,55-55[BULt]	((.(((((((((...((((((((((&))))))))))---)))))))))-))	GUGUGAGCUGCUUUUUAGUUGAGAA&UUUUUAAUUA---AGUAGCUCA-GC	0	0	NA	NA	NA	1	39.6024	4	0.999999	Output/R0h/cleaveLand_result/t_plot/PC-3p-12911_938_XM_016106983.2_68_TPlot.pdf	0	39.6024	-Inf	down	3.1118e-10	6.0515e-10	yes	GO:0016491(oxidoreductase activity);GO:0055114(oxidation-reduction process);GO:0003824(catalytic activity);GO:0008152(metabolic process)	ko00750(Vitamin B6 metabolism);ko01100(Metabolic pathways)
PC-3p-12911_938	XM_016108132.2	1637	1658	1649	-28.7	-21.2	0.738676	12	5-18,1654-1641;19-21,1639-1637	1-4,1658-1655[UP5];x-x,1640-1640[BULt]	(((.((((((((((((((....&....))))))))))))))-)))	GCUAGGGCUGCUUGGUUGUCUG&UUUUUAAUUAAGUAGCUC-AGC	1	32.4181	4	0.825504	Output/R24h/cleaveLand_result/t_plot/PC-3p-12911_938_XM_016108132.2_1649_TPlot.pdf	0	0	NA	NA	NA	32.4181	0	Inf	up	1.2429e-08	1.41251e-08	yes	GO:0005777(peroxisome);GO:0003997(acyl-CoA oxidase activity);GO:0016042(lipid catabolic process);GO:0009987(cellular process);GO:0050662(coenzyme binding);GO:1901575(organic substance catabolic process);GO:0072329(monocarboxylic acid catabolic process);GO:0044255(cellular lipid metabolic process);GO:0016627(oxidoreductase activity, acting on the CH-CH group of donors);GO:0019395(fatty acid oxidat…	ko00071(Fatty acid degradation);ko01110(Biosynthesis of secondary metabolites);ko01040(Biosynthesis of unsaturated fatty acids);ko01212(Fatty acid metabolism);ko00592(alpha-Linolenic acid metabolism);ko01100(Metabolic pathways);ko04146(Peroxisome)
PC-3p-12911_938	XM_016109009.2	1020	1040	1031	-28.7	-19.5	0.679443	7	3-12,1038-1029;14-17,1028-1025;18-21,1023-1020	1-2,1040-1039[UP5];13-13,x-x[BULq];x-x,1024-1024[BULt]	((((.((((-((((((((((..&..)))))))))).))))-))))	GCUGAAGCU-CUUAAUUGGACA&UUUUUAAUUAAGUAGCU-CAGC	1	32.4181	4	0.999999	Output/R24h/cleaveLand_result/t_plot/PC-3p-12911_938_XM_016109009.2_1031_TPlot.pdf	0	0	NA	NA	NA	32.4181	0	Inf	up	1.2429e-08	1.41251e-08	yes	NA	ko04626(Plant-pathogen interaction)
PC-3p-12911_938	XM_016109458.2	2330	2354	2340	-28.7	-19.6	0.682927	12.5	1-8,2354-2347;9-16,2341-2334;18-21,2333-2330	x-x,2346-2342[BULt];17-17,x-x[BULq]	((((-((((((((.....((((((((&))))))))-----)))))))).))))	GCUG-GCUGCUUAGAGAAGUUAAAAA&UUUUUAAU-----UAAGUAGCUCAGC	0	0	NA	NA	NA	3	118.807	2	0.958281	Output/R0h/cleaveLand_result/t_plot/PC-3p-12911_938_XM_016109458.2_2340_TPlot.pdf	0	118.807	-Inf	down	1.1501e-27	2.02633e-26	yes	GO:0097159(organic cyclic compound binding);GO:0030554(adenyl nucleotide binding);GO:0036094(small molecule binding);GO:0005524(ATP binding);GO:0017076(purine nucleotide binding);GO:0032555(purine ribonucleotide binding);GO:1901363(heterocyclic compound binding);GO:0035639(purine ribonucleoside triphosphate binding);GO:1901265(nucleoside phosphate binding);GO:0003824(catalytic activity);GO:003255…	ko03440(Homologous recombination)
PC-3p-12911_938	XM_016114808.2	1645	1665	1656	-28.7	-20	0.696864	16	9-21,1657-1645	1-8,1665-1658[UP5]	(((((((((((((........&........)))))))))))))	GCUGAGUUGCUUAUGGAUUUC&UUUUUAAUUAAGUAGCUCAGC	1	32.4181	4	0.999831	Output/R24h/cleaveLand_result/t_plot/PC-3p-12911_938_XM_016114808.2_1656_TPlot.pdf	0	0	NA	NA	NA	32.4181	0	Inf	up	1.2429e-08	1.41251e-08	yes	GO:0008270(zinc ion binding);GO:0043167(ion binding);GO:0046914(transition metal ion binding);GO:0043169(cation binding);GO:0005488(binding);GO:0046872(metal ion binding)	NA
PC-3p-12911_938	XM_016115678.2	1381	1402	1393	-28.7	-18.9	0.658537	8	2-6,1401-1397;8-17,1395-1386;18-21,1384-1381	1-1,1402-1402[UP5];7-7,1396-1396[SIL];x-x,1385-1385[BULt]	((((.((((((((((.(((((.&.))))).))))))))))-))))	GCUGAAGUUGCUUGAGUGGAAC&UUUUUAAUUAAGUAGCU-CAGC	0	0	NA	NA	NA	2	79.2048	3	0.759342	Output/R0h/cleaveLand_result/t_plot/PC-3p-12911_938_XM_016115678.2_1393_TPlot.pdf	0	79.2048	-Inf	down	5.5905e-19	3.88279e-18	yes	GO:0016020(membrane);GO:0051179(localization);GO:0031224(intrinsic component of membrane);GO:0051234(establishment of localization);GO:0044425(membrane part);GO:0006810(transport);GO:0016021(integral component of membrane)	NA
PC-3p-12911_938	XM_016115841.2	209	219	210	-28.7	-19.6	0.682927	2	12-21,218-209	11-11,219-219[SIL]	((((((((((.&.))))))))))	GCUGAGCUACA&UUUUUAAUUAA	1	32.4181	4	0.999998	Output/R24h/cleaveLand_result/t_plot/PC-3p-12911_938_XM_016115841.2_210_TPlot.pdf	1	39.6024	4	0.999971	Output/R0h/cleaveLand_result/t_plot/PC-3p-12911_938_XM_016115841.2_210_TPlot.pdf	32.4181	39.6024	-0.28879	down	0.39723	0.398704	yes	NA	NA
PC-3p-12911_938	XM_016116515.2	1065	1086	1076	-28.7	-19.22	0.669686	12	1-4,1086-1083;8-10,1078-1076;12-21,1074-1065	5-7,1082-1079[AILt];11-11,1075-1075[SIL]	((((((((((.(((....((((&))))-...))).))))))))))	GCUGAGCUACCUGAGACUGAAA&UUUU-UAAUUAAGUAGCUCAGC	1	32.4181	4	1	Output/R24h/cleaveLand_result/t_plot/PC-3p-12911_938_XM_016116515.2_1076_TPlot.pdf	0	0	NA	NA	NA	32.4181	0	Inf	up	1.2429e-08	1.41251e-08	yes	GO:1902493(acetyltransferase complex);GO:0044451(nucleoplasm part);GO:0005623(cell);GO:0005654(nucleoplasm);GO:0005634(nucleus);GO:0043233(organelle lumen);GO:0031974(membrane-enclosed lumen);GO:0044422(organelle part);GO:0043229(intracellular organelle);GO:0044424(intracellular part);GO:0044446(intracellular organelle part);GO:0043226(organelle);GO:0031248(protein acetyltransferase complex);GO:0…	NA
PC-3p-12911_938	XM_016117918.2	344	364	355	-28.7	-22.88	0.797213	8.5	1-5,364-360;9-21,356-344	6-8,359-357[SIL]	(((((((((((((...(((((&)))))...)))))))))))))	GCUGGGCUACUUACAGAGAGA&UUUUUAAUUAAGUAGCUCAGC	0	0	NA	NA	NA	1	39.6024	4	0.254918	Output/R0h/cleaveLand_result/t_plot/PC-3p-12911_938_XM_016117918.2_355_TPlot.pdf	0	39.6024	-Inf	down	3.1118e-10	6.0515e-10	yes	GO:0008270(zinc ion binding);GO:0043169(cation binding);GO:0043167(ion binding);GO:0046872(metal ion binding);GO:0046914(transition metal ion binding);GO:0005488(binding)	NA
PC-3p-12911_938	XM_021127209.1	385	405	396	-28.7	-22.88	0.797213	8.5	1-5,405-401;9-21,397-385	6-8,400-398[SIL]	(((((((((((((...(((((&)))))...)))))))))))))	GCUGGGCUACUUACAGAGAGA&UUUUUAAUUAAGUAGCUCAGC	2	64.8361	2	0.107316	Output/R24h/cleaveLand_result/t_plot/PC-3p-12911_938_XM_021127209.1_396_TPlot.pdf	0	0	NA	NA	NA	64.8361	0	Inf	up	8.1306e-16	3.55976e-15	yes	GO:0008270(zinc ion binding);GO:0043169(cation binding);GO:0043167(ion binding);GO:0046872(metal ion binding);GO:0046914(transition metal ion binding);GO:0005488(binding)	NA
PC-3p-12911_938	XM_021128747.1	753	775	765	-28.7	-20.1	0.700348	11.5	1-8,775-768;11-16,764-759;17-21,757-753	9-10,767-765[AILt];x-x,758-758[BULt]	(((((.((((((...((((((((&))))))))-..))))))-)))))	GCUGGUGCUACUGCUGUUGAGGA&UUUUUAAU-UAAGUAGC-UCAGC	1	32.4181	4	0.999647	Output/R24h/cleaveLand_result/t_plot/PC-3p-12911_938_XM_021128747.1_765_TPlot.pdf	1	39.6024	4	0.998276	Output/R0h/cleaveLand_result/t_plot/PC-3p-12911_938_XM_021128747.1_765_TPlot.pdf	32.4181	39.6024	-0.28879	down	0.39723	0.398704	yes	GO:0016684(oxidoreductase activity, acting on peroxide as acceptor);GO:0003824(catalytic activity);GO:1901363(heterocyclic compound binding);GO:0016491(oxidoreductase activity);GO:0042221(response to chemical);GO:0009636(response to toxic substance);GO:1990748(cellular detoxification);GO:0098754(detoxification);GO:0004601(peroxidase activity);GO:0050896(response to stimulus);GO:0046906(tetrapyrro…	ko00053(Ascorbate and aldarate metabolism);ko00480(Glutathione metabolism)
PC-3p-12911_938	XM_021128748.1	753	775	765	-28.7	-20.1	0.700348	11.5	1-8,775-768;11-16,764-759;17-21,757-753	9-10,767-765[AILt];x-x,758-758[BULt]	(((((.((((((...((((((((&))))))))-..))))))-)))))	GCUGGUGCUACUGCUGUUGAGGA&UUUUUAAU-UAAGUAGC-UCAGC	0	0	NA	NA	NA	1	39.6024	4	0.997966	Output/R0h/cleaveLand_result/t_plot/PC-3p-12911_938_XM_021128748.1_765_TPlot.pdf	0	39.6024	-Inf	down	3.1118e-10	6.0515e-10	yes	GO:0016684(oxidoreductase activity, acting on peroxide as acceptor);GO:0003824(catalytic activity);GO:1901363(heterocyclic compound binding);GO:0016491(oxidoreductase activity);GO:0042221(response to chemical);GO:0009636(response to toxic substance);GO:1990748(cellular detoxification);GO:0098754(detoxification);GO:0004601(peroxidase activity);GO:0050896(response to stimulus);GO:0046906(tetrapyrro…	ko00053(Ascorbate and aldarate metabolism);ko00480(Glutathione metabolism)
PC-3p-12911_938	XM_021130240.1	1126	1146	1137	-28.7	-20	0.696864	15.5	9-21,1138-1126	1-8,1146-1139[UP5]	(((((((((((((........&........)))))))))))))	GCUGAGUUACUUAUCCAAAAG&UUUUUAAUUAAGUAGCUCAGC	1	32.4181	4	0.999834	Output/R24h/cleaveLand_result/t_plot/PC-3p-12911_938_XM_021130240.1_1137_TPlot.pdf	0	0	NA	NA	NA	32.4181	0	Inf	up	1.2429e-08	1.41251e-08	yes	NA	NA
PC-3p-12911_938	XM_021132052.1	824	844	835	-28.7	-19.6	0.682927	16.5	9-21,836-824	1-8,844-837[UP5]	(((((((((((((........&........)))))))))))))	GCUGAGUUACUUGCUGCUGCC&UUUUUAAUUAAGUAGCUCAGC	0	0	NA	NA	NA	1	39.6024	4	0.999965	Output/R0h/cleaveLand_result/t_plot/PC-3p-12911_938_XM_021132052.1_835_TPlot.pdf	0	39.6024	-Inf	down	3.1118e-10	6.0515e-10	yes	GO:0033036(macromolecule localization);GO:0043231(intracellular membrane-bounded organelle);GO:0033365(protein localization to organelle);GO:0071705(nitrogen compound transport);GO:0043227(membrane-bounded organelle);GO:0071702(organic substance transport);GO:0008565(protein transporter activity);GO:0005737(cytoplasm);GO:0015031(protein transport);GO:0051234(establishment of localization);GO:0034…	NA
PC-3p-12911_938	XM_021137571.1	901	926	913	-28.7	-19.66	0.685017	15.5	1-6,926-921;9-14,914-909;15-21,907-901	7-8,920-915[AILt];x-x,908-908[BULt]	(((((((.((((((......((((((&))))))----..))))))-)))))))	GCUGAGCUUGCUUAUGUGGGUGAAGA&UUUUUA----AUUAAGUA-GCUCAGC	0	0	NA	NA	NA	1	39.6024	4	0.999939	Output/R0h/cleaveLand_result/t_plot/PC-3p-12911_938_XM_021137571.1_913_TPlot.pdf	0	39.6024	-Inf	down	3.1118e-10	6.0515e-10	yes	GO:0005355(glucose transmembrane transporter activity);GO:0005215(transporter activity);GO:1904659(glucose transmembrane transport);GO:0015749(monosaccharide transport);GO:0005623(cell);GO:0055085(transmembrane transport);GO:0015144(carbohydrate transmembrane transporter activity);GO:0005402(cation:sugar symporter activity);GO:0015294(solute:cation symporter activity);GO:0015075(ion transmembrane…	NA
PC-3p-12911_938	XM_021137572.1	799	824	811	-28.7	-19.66	0.685017	15.5	1-6,824-819;9-14,812-807;15-21,805-799	7-8,818-813[AILt];x-x,806-806[BULt]	(((((((.((((((......((((((&))))))----..))))))-)))))))	GCUGAGCUUGCUUAUGUGGGUGAAGA&UUUUUA----AUUAAGUA-GCUCAGC	0	0	NA	NA	NA	1	39.6024	4	0.999943	Output/R0h/cleaveLand_result/t_plot/PC-3p-12911_938_XM_021137572.1_811_TPlot.pdf	0	39.6024	-Inf	down	3.1118e-10	6.0515e-10	yes	GO:0005355(glucose transmembrane transporter activity);GO:0005215(transporter activity);GO:1904659(glucose transmembrane transport);GO:0015749(monosaccharide transport);GO:0005623(cell);GO:0055085(transmembrane transport);GO:0015144(carbohydrate transmembrane transporter activity);GO:0005402(cation:sugar symporter activity);GO:0015294(solute:cation symporter activity);GO:0015075(ion transmembrane…	NA
PC-3p-12911_938	XM_021139531.1	171	181	172	-28.7	-19	0.662021	2	12-21,180-171	11-11,181-181[SIL]	((((((((((.&.))))))))))	GCUGAGCUACC&UUUUUAAUUAA	0	0	NA	NA	NA	1	39.6024	4	1	Output/R0h/cleaveLand_result/t_plot/PC-3p-12911_938_XM_021139531.1_172_TPlot.pdf	0	39.6024	-Inf	down	3.1118e-10	6.0515e-10	yes	GO:0006725(cellular aromatic compound metabolic process);GO:0043227(membrane-bounded organelle);GO:0097159(organic cyclic compound binding);GO:0043412(macromolecule modification);GO:0016070(RNA metabolic process);GO:0005622(intracellular);GO:1901363(heterocyclic compound binding);GO:0004519(endonuclease activity);GO:0044260(cellular macromolecule metabolic process);GO:0090304(nucleic acid metabol…	NA
PC-3p-12911_938	XM_021139532.1	822	832	823	-28.7	-19	0.662021	2	12-21,831-822	11-11,832-832[SIL]	((((((((((.&.))))))))))	GCUGAGCUACC&UUUUUAAUUAA	0	0	NA	NA	NA	2	79.2048	0	0.17001	Output/R0h/cleaveLand_result/t_plot/PC-3p-12911_938_XM_021139532.1_823_TPlot.pdf	0	79.2048	-Inf	down	5.5905e-19	3.88279e-18	yes	GO:0006725(cellular aromatic compound metabolic process);GO:0043227(membrane-bounded organelle);GO:0097159(organic cyclic compound binding);GO:0043412(macromolecule modification);GO:0016070(RNA metabolic process);GO:0005622(intracellular);GO:1901363(heterocyclic compound binding);GO:0004519(endonuclease activity);GO:0044260(cellular macromolecule metabolic process);GO:0090304(nucleic acid metabol…	NA
PC-3p-12911_938	XM_021140431.1	120	142	132	-28.7	-21.5	0.749129	9.5	1-9,142-134;11-16,131-126;17-21,124-120	10-10,133-132[AILt];x-x,125-125[BULt]	(((((.((((((..(((((((((&)))))))))-.))))))-)))))	GCUGAGGCUGCUAGGAUUAGGGA&UUUUUAAUU-AAGUAGC-UCAGC	1	32.4181	4	0.682916	Output/R24h/cleaveLand_result/t_plot/PC-3p-12911_938_XM_021140431.1_132_TPlot.pdf	0	0	NA	NA	NA	32.4181	0	Inf	up	1.2429e-08	1.41251e-08	yes	GO:0009987(cellular process);GO:0061919(process utilizing autophagic mechanism);GO:0006914(autophagy);GO:0008152(metabolic process);GO:0009056(catabolic process);GO:0044248(cellular catabolic process);GO:0044237(cellular metabolic process)	ko04136(Autophagy - other)
PC-3p-12911_938	XM_021143289.1	837	847	838	-28.7	-18.8	0.655052	3	12-21,846-837	11-11,847-847[SIL]	((((((((((.&.))))))))))	GCUGAGCUGCC&UUUUUAAUUAA	0	0	NA	NA	NA	1	39.6024	4	1	Output/R0h/cleaveLand_result/t_plot/PC-3p-12911_938_XM_021143289.1_838_TPlot.pdf	0	39.6024	-Inf	down	3.1118e-10	6.0515e-10	yes	GO:0003676(nucleic acid binding);GO:0005488(binding);GO:0097159(organic cyclic compound binding);GO:1901363(heterocyclic compound binding)	NA
PC-3p-12911_938	XM_021143837.1	734	758	749	-28.7	-19.7	0.686411	12	3-13,756-746;14-21,741-734	1-2,758-757[UP5];x-x,745-742[BULt]	((((((((....(((((((((((..&..)))))))))))----))))))))	GCUGAGUUUUUGGCUUGGUUGGAUU&UUUUUAAUUAAGU----AGCUCAGC	0	0	NA	NA	NA	1	39.6024	4	0.999833	Output/R0h/cleaveLand_result/t_plot/PC-3p-12911_938_XM_021143837.1_749_TPlot.pdf	0	39.6024	-Inf	down	3.1118e-10	6.0515e-10	yes	GO:0031224(intrinsic component of membrane);GO:0004659(prenyltransferase activity);GO:0016740(transferase activity);GO:0016021(integral component of membrane);GO:0016765(transferase activity, transferring alkyl or aryl (other than methyl) groups);GO:0016020(membrane);GO:0003824(catalytic activity);GO:0044425(membrane part)	ko01100(Metabolic pathways);ko00130(Ubiquinone and other terpenoid-quinone biosynthesis);ko01110(Biosynthesis of secondary metabolites)
PC-3p-13278_910	BGI_novel_T002061	4879	4897	4888	-37	-24.2	0.654054	6.5	3-11,4895-4887;13-14,4886-4885;16-21,4884-4879	1-2,4897-4896[UP5];12-12,x-x[BULq];15-15,x-x[BULq]	((((((-((-(((((((((..&..))))))))).)).))))))	GCUAAG-AC-GCUUGCCAACC&UUUUGGCAAGCUGUUCUUGGC	1	32.4181	4	1	Output/R24h/cleaveLand_result/t_plot/PC-3p-13278_910_BGI_novel_T002061_4888_TPlot.pdf	0	0	NA	NA	NA	32.4181	0	Inf	up	1.2429e-08	1.41251e-08	yes	GO:0003824(catalytic activity);GO:0043232(intracellular non-membrane-bounded organelle);GO:0006338(chromatin remodeling);GO:0003676(nucleic acid binding);GO:0070013(intracellular organelle lumen);GO:0016070(RNA metabolic process);GO:0032774(RNA biosynthetic process);GO:0097659(nucleic acid-templated transcription);GO:0043229(intracellular organelle);GO:0018130(heterocycle biosynthetic process);GO…	NA
PC-3p-13278_910	BGI_novel_T006120	639	658	649	-37	-25.3	0.683784	10	5-8,654-651;10-17,649-642;19-21,641-639	1-4,658-655[UP5];9-9,650-650[SIL];18-18,x-x[BULq]	(((-((((((((.((((....&....)))).)))))))).)))	GCC-AGAACAGCGUGCCCUUC&UUUUGGCAAGCUGUUCUUGGC	0	0	NA	NA	NA	1	39.6024	4	0.999978	Output/R0h/cleaveLand_result/t_plot/PC-3p-13278_910_BGI_novel_T006120_649_TPlot.pdf	0	39.6024	-Inf	down	3.1118e-10	6.0515e-10	yes	GO:0009987(cellular process);GO:0016021(integral component of membrane);GO:0016192(vesicle-mediated transport);GO:0044425(membrane part);GO:0098796(membrane protein complex);GO:0044444(cytoplasmic part);GO:0022406(membrane docking);GO:0016020(membrane);GO:0071702(organic substance transport);GO:0008104(protein localization);GO:0016043(cellular component organization);GO:0046907(intracellular tran…	ko04130(SNARE interactions in vesicular transport);ko04145(Phagosome)
PC-3p-13278_910	BGI_novel_T006121	741	760	751	-37	-25.3	0.683784	10	5-8,756-753;10-17,751-744;19-21,743-741	1-4,760-757[UP5];9-9,752-752[SIL];18-18,x-x[BULq]	(((-((((((((.((((....&....)))).)))))))).)))	GCC-AGAACAGCGUGCCCUUC&UUUUGGCAAGCUGUUCUUGGC	0	0	NA	NA	NA	1	39.6024	4	0.999988	Output/R0h/cleaveLand_result/t_plot/PC-3p-13278_910_BGI_novel_T006121_751_TPlot.pdf	0	39.6024	-Inf	down	3.1118e-10	6.0515e-10	yes	GO:0009987(cellular process);GO:0016021(integral component of membrane);GO:0016192(vesicle-mediated transport);GO:0044425(membrane part);GO:0098796(membrane protein complex);GO:0044444(cytoplasmic part);GO:0022406(membrane docking);GO:0016020(membrane);GO:0071702(organic substance transport);GO:0008104(protein localization);GO:0016043(cellular component organization);GO:0046907(intracellular tran…	ko04130(SNARE interactions in vesicular transport);ko04145(Phagosome)
PC-3p-13278_910	BGI_novel_T006123	741	760	751	-37	-25.3	0.683784	10	5-8,756-753;10-17,751-744;19-21,743-741	1-4,760-757[UP5];9-9,752-752[SIL];18-18,x-x[BULq]	(((-((((((((.((((....&....)))).)))))))).)))	GCC-AGAACAGCGUGCCCUUC&UUUUGGCAAGCUGUUCUUGGC	0	0	NA	NA	NA	1	39.6024	4	0.999987	Output/R0h/cleaveLand_result/t_plot/PC-3p-13278_910_BGI_novel_T006123_751_TPlot.pdf	0	39.6024	-Inf	down	3.1118e-10	6.0515e-10	yes	GO:0009987(cellular process);GO:0016021(integral component of membrane);GO:0016192(vesicle-mediated transport);GO:0044425(membrane part);GO:0098796(membrane protein complex);GO:0044444(cytoplasmic part);GO:0022406(membrane docking);GO:0016020(membrane);GO:0071702(organic substance transport);GO:0008104(protein localization);GO:0016043(cellular component organization);GO:0046907(intracellular tran…	ko04130(SNARE interactions in vesicular transport);ko04145(Phagosome)
PC-3p-13278_910	BGI_novel_T006304	1080	1100	1091	-37	-24.8	0.67027	4	1-13,1100-1088;15-16,1086-1085;18-20,1083-1081	14-14,1087-1087[SIL];17-17,1084-1084[SIL];21-21,1080-1080[UP3]	.(((.((.(((((((((((((&))))))))))))).)).))).	ACCAUGAUCAGCUUGUCAAAA&UUUUGGCAAGCUGUUCUUGGC	3	97.2542	2	0.999301	Output/R24h/cleaveLand_result/t_plot/PC-3p-13278_910_BGI_novel_T006304_1091_TPlot.pdf	1	39.6024	4	1	Output/R0h/cleaveLand_result/t_plot/PC-3p-13278_910_BGI_novel_T006304_1091_TPlot.pdf	97.2542	39.6024	1.29617	up	8.2959e-07	9.29693e-07	yes	GO:0005524(ATP binding);GO:1901363(heterocyclic compound binding);GO:1901564(organonitrogen compound metabolic process);GO:0043170(macromolecule metabolic process);GO:0008152(metabolic process);GO:0003824(catalytic activity);GO:0044237(cellular metabolic process);GO:0032555(purine ribonucleotide binding);GO:0043167(ion binding);GO:0036211(protein modification process);GO:0006468(protein phosphory…	ko03008(Ribosome biogenesis in eukaryotes);ko04712(Circadian rhythm - plant)
PC-3p-13278_910	BGI_novel_T007389	1187	1207	1198	-37	-24.4	0.659459	7.5	2-16,1206-1192;18-18,1190-1190;20-21,1188-1187	1-1,1207-1207[UP5];17-17,1191-1191[SIL];19-19,1189-1189[SIL]	((.(.(((((((((((((((.&.))))))))))))))).).))	GUGAUGGGCAGCUUGCUAGGC&UUUUGGCAAGCUGUUCUUGGC	1	32.4181	4	1	Output/R24h/cleaveLand_result/t_plot/PC-3p-13278_910_BGI_novel_T007389_1198_TPlot.pdf	0	0	NA	NA	NA	32.4181	0	Inf	up	1.2429e-08	1.41251e-08	yes	GO:0005623(cell);GO:0005622(intracellular);GO:0043229(intracellular organelle);GO:0043231(intracellular membrane-bounded organelle);GO:0044444(cytoplasmic part);GO:0043227(membrane-bounded organelle);GO:0044464(cell part);GO:0043226(organelle);GO:0005737(cytoplasm);GO:0044424(intracellular part);GO:0005739(mitochondrion)	NA
PC-3p-13278_910	BGI_novel_T008285	5806	5825	5816	-37	-27.5	0.743243	6.5	3-11,5823-5815;13-17,5813-5809;19-21,5808-5806	1-2,5825-5824[UP5];12-12,5814-5814[SIL];18-18,x-x[BULq]	(((-(((((.(((((((((..&..))))))))).))))).)))	GCC-AGAGCUGCUUGCCAACA&UUUUGGCAAGCUGUUCUUGGC	1	32.4181	4	0.899458	Output/R24h/cleaveLand_result/t_plot/PC-3p-13278_910_BGI_novel_T008285_5816_TPlot.pdf	0	0	NA	NA	NA	32.4181	0	Inf	up	1.2429e-08	1.41251e-08	yes	NA	ko03410(Base excision repair)
PC-3p-13278_910	BGI_novel_T009469	3415	3443	3426	-37	-24.1	0.651351	23	4-9,3440-3435;10-20,3426-3416	1-3,3443-3441[UP5];x-x,3434-3427[BULt];21-21,3415-3415[UP3]	.(((((((((((........((((((...&...))))))--------))))))))))).	ACCGAGGACAGCAGACAAUUUUGCCAUGC&UUUUGGCAA--------GCUGUUCUUGGC	0	0	NA	NA	NA	1	39.6024	4	1	Output/R0h/cleaveLand_result/t_plot/PC-3p-13278_910_BGI_novel_T009469_3426_TPlot.pdf	0	39.6024	-Inf	down	3.1118e-10	6.0515e-10	yes	GO:0044431(Golgi apparatus part);GO:0030665(clathrin-coated vesicle membrane);GO:0016043(cellular component organization);GO:0098805(whole membrane);GO:0044424(intracellular part);GO:0030276(clathrin binding);GO:0030125(clathrin vesicle coat);GO:0051641(cellular localization);GO:0005488(binding);GO:0034613(cellular protein localization);GO:0005515(protein binding);GO:0031410(cytoplasmic vesicle);…	ko04144(Endocytosis)
PC-3p-13278_910	BGI_novel_T010403	361	382	373	-37	-24.3	0.656757	8	2-15,381-368;16-18,366-364;20-21,362-361	1-1,382-382[UP5];x-x,367-367[BULt];19-19,363-363[SIL]	((.(((.((((((((((((((.&.))))))))))))))-))).))	GCGGAGAAGCGGUUUGCUGAAG&UUUUGGCAAGCUGUU-CUUGGC	0	0	NA	NA	NA	1	39.6024	4	1	Output/R0h/cleaveLand_result/t_plot/PC-3p-13278_910_BGI_novel_T010403_373_TPlot.pdf	0	39.6024	-Inf	down	3.1118e-10	6.0515e-10	yes	GO:0010556(regulation of macromolecule biosynthetic process);GO:0090304(nucleic acid metabolic process);GO:0018130(heterocycle biosynthetic process);GO:1901360(organic cyclic compound metabolic process);GO:1903506(regulation of nucleic acid-templated transcription);GO:0005488(binding);GO:0046483(heterocycle metabolic process);GO:0006351(transcription, DNA-templated);GO:0032774(RNA biosynthetic pr…	NA
PC-3p-13278_910	BGI_novel_T010432	1006	1024	1015	-37	-25.4	0.686486	8.5	4-11,1021-1014;13-14,1013-1012;16-21,1011-1006	1-3,1024-1022[UP5];12-12,x-x[BULq];15-15,x-x[BULq]	((((((-((-((((((((...&...)))))))).)).))))))	GCCAGG-AC-GCUUGCCAUGG&UUUUGGCAAGCUGUUCUUGGC	1	32.4181	4	0.999996	Output/R24h/cleaveLand_result/t_plot/PC-3p-13278_910_BGI_novel_T010432_1015_TPlot.pdf	0	0	NA	NA	NA	32.4181	0	Inf	up	1.2429e-08	1.41251e-08	yes	GO:0030001(metal ion transport);GO:0015075(ion transmembrane transporter activity);GO:0006810(transport);GO:0046873(metal ion transmembrane transporter activity);GO:0022857(transmembrane transporter activity);GO:0098662(inorganic cation transmembrane transport);GO:0005385(zinc ion transmembrane transporter activity);GO:0055085(transmembrane transport);GO:0044425(membrane part);GO:0031224(intrinsi…	NA
PC-3p-13278_910	BGI_novel_T011014	3499	3525	3516	-37	-28.2	0.762162	9.5	2-14,3524-3512;15-21,3505-3499	1-1,3525-3525[UP5];x-x,3511-3506[BULt]	(((((((......(((((((((((((.&.)))))))))))))------)))))))	GCUAAGAAAUACCACAGCUUGCCGGAC&UUUUGGCAAGCUGU------UCUUGGC	1	32.4181	4	0.610091	Output/R24h/cleaveLand_result/t_plot/PC-3p-13278_910_BGI_novel_T011014_3516_TPlot.pdf	0	0	NA	NA	NA	32.4181	0	Inf	up	1.2429e-08	1.41251e-08	yes	GO:0005215(transporter activity);GO:0006810(transport);GO:0065007(biological regulation);GO:0051179(localization);GO:0032870(cellular response to hormone stimulus);GO:0042221(response to chemical);GO:0044425(membrane part);GO:0044464(cell part);GO:0050789(regulation of biological process);GO:0000160(phosphorelay signal transduction system);GO:0071310(cellular response to organic substance);GO:000…	ko04016(MAPK signaling pathway - plant);ko04075(Plant hormone signal transduction)
PC-3p-13278_910	BGI_novel_T011576	281	302	293	-37	-25.7	0.694595	9	1-11,302-292;12-15,290-287;18-21,284-281	x-x,291-291[BULt];16-17,286-285[SIL]	((((..((((.(((((((((((&)))))))))))-))))..))))	GCCAUUGGCGUGCUUGCCGGGA&UUUUGGCAAGC-UGUUCUUGGC	1	32.4181	4	0.999949	Output/R24h/cleaveLand_result/t_plot/PC-3p-13278_910_BGI_novel_T011576_293_TPlot.pdf	0	0	NA	NA	NA	32.4181	0	Inf	up	1.2429e-08	1.41251e-08	yes	NA	ko03015(mRNA surveillance pathway)
PC-3p-13278_910	BGI_novel_T012213	1669	1690	1681	-37	-24.5	0.662162	13.5	6-11,1685-1680;13-21,1677-1669	1-5,1690-1686[UP5];12-12,1679-1678[AILt]	(((((((((..((((((.....&.....))))))-.)))))))))	GCCAAGAAUCUGCUUGCGCUUG&UUUUGGCAAGC-UGUUCUUGGC	1	32.4181	4	1	Output/R24h/cleaveLand_result/t_plot/PC-3p-13278_910_BGI_novel_T012213_1681_TPlot.pdf	0	0	NA	NA	NA	32.4181	0	Inf	up	1.2429e-08	1.41251e-08	yes	GO:0043229(intracellular organelle);GO:0006725(cellular aromatic compound metabolic process);GO:0043169(cation binding);GO:0016887(ATPase activity);GO:0016787(hydrolase activity);GO:0016788(hydrolase activity, acting on ester bonds);GO:0044464(cell part);GO:1901363(heterocyclic compound binding);GO:0003723(RNA binding);GO:0097159(organic cyclic compound binding);GO:0090304(nucleic acid metabolic …	ko03440(Homologous recombination)
PC-3p-13278_910	BGI_novel_T012284	3440	3460	3451	-37	-24.9	0.672973	5	1-19,3460-3442	20-21,3441-3440[UP3]	..(((((((((((((((((((&)))))))))))))))))))..	AGCAAGGAUAGUUUGUCAAAA&UUUUGGCAAGCUGUUCUUGGC	1	32.4181	4	1	Output/R24h/cleaveLand_result/t_plot/PC-3p-13278_910_BGI_novel_T012284_3451_TPlot.pdf	0	0	NA	NA	NA	32.4181	0	Inf	up	1.2429e-08	1.41251e-08	yes	NA	NA
PC-3p-13278_910	BGI_novel_T012529	330	350	341	-37	-24.8	0.67027	7.5	2-7,349-344;10-12,341-339;14-18,337-333;20-21,331-330	1-1,350-350[UP5];8-9,343-342[SIL];13-13,338-338[SIL];19-19,332-332[SIL]	((.(((((.(((..((((((.&.))))))..))).))))).))	GCGAAGAGGAGCAGGCCAAAG&UUUUGGCAAGCUGUUCUUGGC	1	32.4181	4	1	Output/R24h/cleaveLand_result/t_plot/PC-3p-13278_910_BGI_novel_T012529_341_TPlot.pdf	0	0	NA	NA	NA	32.4181	0	Inf	up	1.2429e-08	1.41251e-08	yes	NA	ko00620(Pyruvate metabolism);ko01200(Carbon metabolism);ko00710(Carbon fixation in photosynthetic organisms);ko01100(Metabolic pathways)
PC-3p-13278_910	BGI_novel_T013986	923	945	936	-37	-24.3	0.656757	10	2-12,944-934;13-20,931-924	1-1,945-945[UP5];x-x,933-932[BULt];21-21,923-923[UP3]	.((((((((..(((((((((((.&.)))))))))))--)))))))).	UCCGAGAAUUAGGCUUGUCAGAU&UUUUGGCAAGCU--GUUCUUGGC	2	64.8361	2	0.999983	Output/R24h/cleaveLand_result/t_plot/PC-3p-13278_910_BGI_novel_T013986_936_TPlot.pdf	0	0	NA	NA	NA	64.8361	0	Inf	up	8.1306e-16	3.55976e-15	yes	GO:0043226(organelle);GO:0043231(intracellular membrane-bounded organelle);GO:1901363(heterocyclic compound binding);GO:0005623(cell);GO:0050789(regulation of biological process);GO:0003676(nucleic acid binding);GO:0010468(regulation of gene expression);GO:0005739(mitochondrion);GO:0044424(intracellular part);GO:0060255(regulation of macromolecule metabolic process);GO:0031323(regulation of cellu…	NA
PC-3p-13278_910	BGI_novel_T014179	2056	2081	2067	-37	-24.52	0.662703	20.5	5-8,2077-2074;10-21,2067-2056	1-4,2081-2078[UP5];9-9,2073-2068[AILt]	((((((((((((......((((....&....))))-----.))))))))))))	GCCGAGGGCAGCCCCCUCUGCCCCUC&UUUUGGCA-----AGCUGUUCUUGGC	0	0	NA	NA	NA	1	39.6024	4	1	Output/R0h/cleaveLand_result/t_plot/PC-3p-13278_910_BGI_novel_T014179_2067_TPlot.pdf	0	39.6024	-Inf	down	3.1118e-10	6.0515e-10	yes	NA	ko01100(Metabolic pathways);ko00190(Oxidative phosphorylation)
PC-3p-13278_910	BGI_novel_T014221	634	653	645	-37	-24.1	0.651351	9.5	1-6,653-648;9-21,646-634	7-8,647-647[AILq]	(((((((((((((.-((((((&))))))..)))))))))))))	GCCAGGGAUGGCUC-CCGGGA&UUUUGGCAAGCUGUUCUUGGC	1	32.4181	4	1	Output/R24h/cleaveLand_result/t_plot/PC-3p-13278_910_BGI_novel_T014221_645_TPlot.pdf	0	0	NA	NA	NA	32.4181	0	Inf	up	1.2429e-08	1.41251e-08	yes	NA	NA
PC-3p-13278_910	XM_016077350.2	823	842	833	-37	-24.6	0.664865	11.5	5-14,838-829;16-21,828-823	1-4,842-839[UP5];15-15,x-x[BULq]	((((((-((((((((((....&....)))))))))).))))))	GCCAGG-ACGGCUUGUUGCAC&UUUUGGCAAGCUGUUCUUGGC	0	0	NA	NA	NA	1	39.6024	4	1	Output/R0h/cleaveLand_result/t_plot/PC-3p-13278_910_XM_016077350.2_833_TPlot.pdf	0	39.6024	-Inf	down	3.1118e-10	6.0515e-10	yes	GO:0036211(protein modification process);GO:0050896(response to stimulus);GO:0005524(ATP binding);GO:0065007(biological regulation);GO:0009987(cellular process);GO:1901363(heterocyclic compound binding);GO:0050789(regulation of biological process);GO:0043170(macromolecule metabolic process);GO:0006464(cellular protein modification process);GO:0016310(phosphorylation);GO:0043167(ion binding);GO:00…	NA
PC-3p-13278_910	XM_016077959.2	1627	1651	1640	-37	-24.6	0.664865	9.5	1-8,1651-1644;9-14,1641-1636;15-21,1633-1627	x-x,1643-1642[BULt];x-x,1635-1634[BULt]	(((((((..((((((..((((((((&))))))))--))))))--)))))))	GCCAAGGAUGCGGCUCCUGUCAAAG&UUUUGGCA--AGCUGU--UCUUGGC	0	0	NA	NA	NA	2	79.2048	2	0.997989	Output/R0h/cleaveLand_result/t_plot/PC-3p-13278_910_XM_016077959.2_1640_TPlot.pdf	0	79.2048	-Inf	down	5.5905e-19	3.88279e-18	yes	GO:0044260(cellular macromolecule metabolic process);GO:0000166(nucleotide binding);GO:0006412(translation);GO:0034645(cellular macromolecule biosynthetic process);GO:0097159(organic cyclic compound binding);GO:0017076(purine nucleotide binding);GO:0032561(guanyl ribonucleotide binding);GO:0008135(translation factor activity, RNA binding);GO:0001882(nucleoside binding);GO:0003824(catalytic activi…	NA
PC-3p-13278_910	XM_016078762.2	979	1000	991	-37	-24.1	0.651351	12	5-10,996-991;12-21,988-979	1-4,1000-997[UP5];11-11,990-989[AILt]	((((((((((..((((((....&....))))))-.))))))))))	GCCAAGAACAAAUUUGCCUGUG&UUUUGGCAAG-CUGUUCUUGGC	1	32.4181	4	1	Output/R24h/cleaveLand_result/t_plot/PC-3p-13278_910_XM_016078762.2_991_TPlot.pdf	0	0	NA	NA	NA	32.4181	0	Inf	up	1.2429e-08	1.41251e-08	yes	GO:1903506(regulation of nucleic acid-templated transcription);GO:0003677(DNA binding);GO:0060255(regulation of macromolecule metabolic process);GO:0050789(regulation of biological process);GO:0010468(regulation of gene expression);GO:0010556(regulation of macromolecule biosynthetic process);GO:0005488(binding);GO:0006355(regulation of transcription, DNA-templated);GO:2000112(regulation of cellul…	ko04075(Plant hormone signal transduction)
PC-3p-13278_910	XM_016079508.2	1012	1033	1023	-37	-24.2	0.654054	10.5	1-7,1033-1027;9-19,1024-1014	8-8,1026-1025[AILt];20-21,1013-1012[UP3]	..(((((((((((..(((((((&)))))))-.)))))))))))..	AGCGGGAGCAGCUACGCCGGGA&UUUUGGC-AAGCUGUUCUUGGC	1	32.4181	4	1	Output/R24h/cleaveLand_result/t_plot/PC-3p-13278_910_XM_016079508.2_1023_TPlot.pdf	0	0	NA	NA	NA	32.4181	0	Inf	up	1.2429e-08	1.41251e-08	yes	GO:0036094(small molecule binding);GO:0006793(phosphorus metabolic process);GO:0044267(cellular protein metabolic process);GO:0006464(cellular protein modification process);GO:0032553(ribonucleotide binding);GO:0043170(macromolecule metabolic process);GO:0009987(cellular process);GO:1901363(heterocyclic compound binding);GO:1901265(nucleoside phosphate binding);GO:0044238(primary metabolic proces…	ko04016(MAPK signaling pathway - plant);ko04075(Plant hormone signal transduction)
PC-3p-13278_910	XM_016080992.2	711	731	722	-37	-25.6	0.691892	6.5	1-7,731-725;10-19,722-713	8-9,724-723[SIL];20-21,712-711[UP3]	..((((((((((..(((((((&)))))))..))))))))))..	UGCAAGAACAGCAAGCCAAAG&UUUUGGCAAGCUGUUCUUGGC	1	32.4181	4	0.999988	Output/R24h/cleaveLand_result/t_plot/PC-3p-13278_910_XM_016080992.2_722_TPlot.pdf	0	0	NA	NA	NA	32.4181	0	Inf	up	1.2429e-08	1.41251e-08	yes	GO:0055114(oxidation-reduction process);GO:0016491(oxidoreductase activity);GO:0046906(tetrapyrrole binding);GO:0016209(antioxidant activity);GO:0006979(response to oxidative stress);GO:0097159(organic cyclic compound binding);GO:0098869(cellular oxidant detoxification);GO:0009636(response to toxic substance);GO:0005488(binding);GO:0008152(metabolic process);GO:0050896(response to stimulus);GO:00…	ko01110(Biosynthesis of secondary metabolites);ko00940(Phenylpropanoid biosynthesis);ko01100(Metabolic pathways)
PC-3p-13278_910	XM_016081470.2	2389	2412	2403	-37	-25.1	0.678378	9.5	3-18,2410-2395;19-21,2391-2389	1-2,2412-2411[UP5];x-x,2394-2392[BULt]	(((...((((((((((((((((..&..))))))))))))))))---)))	GCCUUGAGGAACAGCUUGUUGAUA&UUUUGGCAAGCUGUUCUU---GGC	1	32.4181	4	1	Output/R24h/cleaveLand_result/t_plot/PC-3p-13278_910_XM_016081470.2_2403_TPlot.pdf	0	0	NA	NA	NA	32.4181	0	Inf	up	1.2429e-08	1.41251e-08	yes	GO:0044425(membrane part);GO:0031224(intrinsic component of membrane);GO:0016021(integral component of membrane);GO:0016020(membrane)	NA
PC-3p-13278_910	XM_016082657.2	590	611	601	-37	-24.3	0.656757	10	3-6,609-606;7-7,604-604;9-20,602-591	1-2,611-610[UP5];x-x,605-605[BULt];8-8,603-603[SIL];21-21,590-590[UP3]	.((((((((((((.(.((((..&..))))-).)))))))))))).	UCCGAGAGCAGCUCGACCGACG&UUUUGG-CAAGCUGUUCUUGGC	1	32.4181	4	1	Output/R24h/cleaveLand_result/t_plot/PC-3p-13278_910_XM_016082657.2_601_TPlot.pdf	0	0	NA	NA	NA	32.4181	0	Inf	up	1.2429e-08	1.41251e-08	yes	GO:0031323(regulation of cellular metabolic process);GO:0031326(regulation of cellular biosynthetic process);GO:0060255(regulation of macromolecule metabolic process);GO:1901363(heterocyclic compound binding);GO:0080090(regulation of primary metabolic process);GO:0097159(organic cyclic compound binding);GO:0010468(regulation of gene expression);GO:0051252(regulation of RNA metabolic process);GO:2…	ko04626(Plant-pathogen interaction);ko04016(MAPK signaling pathway - plant)
PC-3p-13278_910	XM_016082670.2	831	852	843	-37	-24.9	0.672973	7	1-9,852-844;11-18,842-835;19-21,833-831	10-10,843-843[SIL];x-x,834-834[BULt]	(((.((((((((.(((((((((&))))))))).))))))))-)))	GCUGAGGAACAGGUUGCUGAGA&UUUUGGCAAGCUGUUCUU-GGC	5	162.09	2	0.997807	Output/R24h/cleaveLand_result/t_plot/PC-3p-13278_910_XM_016082670.2_843_TPlot.pdf	1	39.6024	4	1	Output/R0h/cleaveLand_result/t_plot/PC-3p-13278_910_XM_016082670.2_843_TPlot.pdf	162.09	39.6024	2.03314	up	6.3971e-18	4.36528e-17	yes	GO:0003824(catalytic activity);GO:0015399(primary active transmembrane transporter activity);GO:0005773(vacuole);GO:0016817(hydrolase activity, acting on acid anhydrides);GO:0031090(organelle membrane);GO:0005623(cell);GO:0098805(whole membrane);GO:0043227(membrane-bounded organelle);GO:0016462(pyrophosphatase activity);GO:0005794(Golgi apparatus);GO:0016020(membrane);GO:0043492(ATPase activity, …	ko00190(Oxidative phosphorylation);ko04145(Phagosome);ko01100(Metabolic pathways)
PC-3p-13278_910	XM_016082996.2	884	905	896	-37	-24.5	0.662162	10	2-4,904-902;7-12,899-894;13-21,892-884	1-1,905-905[UP5];5-6,901-900[SIL];x-x,893-893[BULt]	(((((((((.((((((..(((.&.)))..))))))-)))))))))	GCCGGGAACAAGCUUGAAGGAU&UUUUGGCAAGCU-GUUCUUGGC	4	129.672	2	0.999915	Output/R24h/cleaveLand_result/t_plot/PC-3p-13278_910_XM_016082996.2_896_TPlot.pdf	1	39.6024	4	1	Output/R0h/cleaveLand_result/t_plot/PC-3p-13278_910_XM_016082996.2_896_TPlot.pdf	129.672	39.6024	1.71121	up	4.418e-12	1.82971e-11	yes	NA	NA
PC-3p-13278_910	XM_016084548.2	587	606	598	-37	-24.2	0.654054	5.5	1-6,606-601;8-20,600-588	7-7,x-x[BULq];21-21,587-587[UP3]	.(((((((((((((-((((((&)))))).))))))))))))).	UCCAAGAACAGCUU-CUGAAG&UUUUGGCAAGCUGUUCUUGGC	0	0	NA	NA	NA	1	39.6024	4	1	Output/R0h/cleaveLand_result/t_plot/PC-3p-13278_910_XM_016084548.2_598_TPlot.pdf	0	39.6024	-Inf	down	3.1118e-10	6.0515e-10	yes	GO:0051726(regulation of cell cycle);GO:0007088(regulation of mitotic nuclear division);GO:0051783(regulation of nuclear division);GO:1901991(negative regulation of mitotic cell cycle phase transition);GO:1905818(regulation of chromosome separation);GO:0033045(regulation of sister chromatid segregation);GO:0007094(mitotic spindle assembly checkpoint);GO:0045786(negative regulation of cell cycle);…	NA
PC-3p-13278_910	XM_016085525.2	188	207	199	-37	-26.2	0.708108	8.5	3-7,205-201;10-21,199-188	1-2,207-206[UP5];8-9,200-200[AILq]	((((((((((((.-(((((..&..)))))..))))))))))))	GCCAGGAACAGCA-GUCAACA&UUUUGGCAAGCUGUUCUUGGC	1	32.4181	4	0.997207	Output/R24h/cleaveLand_result/t_plot/PC-3p-13278_910_XM_016085525.2_199_TPlot.pdf	0	0	NA	NA	NA	32.4181	0	Inf	up	1.2429e-08	1.41251e-08	yes	GO:0097159(organic cyclic compound binding);GO:0005622(intracellular);GO:0097367(carbohydrate derivative binding);GO:0042026(protein refolding);GO:0006457(protein folding);GO:0000166(nucleotide binding);GO:0036094(small molecule binding);GO:0017076(purine nucleotide binding);GO:0005524(ATP binding);GO:0009987(cellular process);GO:0030554(adenyl nucleotide binding);GO:0044424(intracellular part);G…	ko03018(RNA degradation)
PC-3p-13278_910	XM_016085537.2	416	437	427	-37	-25.6	0.691892	14.5	5-7,433-431;10-21,427-416	1-4,437-434[UP5];8-9,430-428[AILt]	((((((((((((...(((....&....)))-..))))))))))))	GCCAAGGACGGCAUCGCCCAGG&UUUUGGC-AAGCUGUUCUUGGC	2	64.8361	2	0.975483	Output/R24h/cleaveLand_result/t_plot/PC-3p-13278_910_XM_016085537.2_427_TPlot.pdf	1	39.6024	4	0.999878	Output/R0h/cleaveLand_result/t_plot/PC-3p-13278_910_XM_016085537.2_427_TPlot.pdf	64.8361	39.6024	0.71121	up	0.01354	0.0144021	yes	GO:0044238(primary metabolic process);GO:0071013(catalytic step 2 spliceosome);GO:0044424(intracellular part);GO:1901360(organic cyclic compound metabolic process);GO:0000377(RNA splicing, via transesterification reactions with bulged adenosine as nucleophile);GO:0046483(heterocycle metabolic process);GO:0044428(nuclear part);GO:1990904(ribonucleoprotein complex);GO:0005681(spliceosomal complex);…	ko03040(Spliceosome)
PC-3p-13278_910	XM_016086403.2	330	350	341	-37	-24.8	0.67027	7.5	2-7,349-344;10-12,341-339;14-18,337-333;20-21,331-330	1-1,350-350[UP5];8-9,343-342[SIL];13-13,338-338[SIL];19-19,332-332[SIL]	((.(((((.(((..((((((.&.))))))..))).))))).))	GCGAAGAGGAGCAGGCCAAAG&UUUUGGCAAGCUGUUCUUGGC	1	32.4181	4	1	Output/R24h/cleaveLand_result/t_plot/PC-3p-13278_910_XM_016086403.2_341_TPlot.pdf	0	0	NA	NA	NA	32.4181	0	Inf	up	1.2429e-08	1.41251e-08	yes	NA	ko00620(Pyruvate metabolism);ko01200(Carbon metabolism);ko00710(Carbon fixation in photosynthetic organisms);ko01100(Metabolic pathways)
PC-3p-13278_910	XM_016086404.2	330	350	341	-37	-24.8	0.67027	7.5	2-7,349-344;10-12,341-339;14-18,337-333;20-21,331-330	1-1,350-350[UP5];8-9,343-342[SIL];13-13,338-338[SIL];19-19,332-332[SIL]	((.(((((.(((..((((((.&.))))))..))).))))).))	GCGAAGAGGAGCAGGCCAAAG&UUUUGGCAAGCUGUUCUUGGC	1	32.4181	4	1	Output/R24h/cleaveLand_result/t_plot/PC-3p-13278_910_XM_016086404.2_341_TPlot.pdf	0	0	NA	NA	NA	32.4181	0	Inf	up	1.2429e-08	1.41251e-08	yes	NA	ko00620(Pyruvate metabolism);ko01200(Carbon metabolism);ko00710(Carbon fixation in photosynthetic organisms);ko01100(Metabolic pathways)
PC-3p-13278_910	XM_016086451.2	765	788	779	-37	-25.24	0.682162	11	2-7,787-782;10-16,779-773;18-21,768-765	1-1,788-788[UP5];8-9,781-780[SIL];17-17,772-769[AILt]	((((....(((((((..((((((.&.))))))..)))))))---.))))	GCCACCACGAACGGCGGGCCAAGG&UUUUGGCAAGCUGUUC---UUGGC	2	64.8361	3	0.717445	Output/R24h/cleaveLand_result/t_plot/PC-3p-13278_910_XM_016086451.2_779_TPlot.pdf	1	39.6024	4	0.999989	Output/R0h/cleaveLand_result/t_plot/PC-3p-13278_910_XM_016086451.2_779_TPlot.pdf	64.8361	39.6024	0.71121	up	0.01354	0.0144021	yes	GO:0043226(organelle);GO:0043231(intracellular membrane-bounded organelle);GO:1901700(response to oxygen-containing compound);GO:0003676(nucleic acid binding);GO:0003700(DNA binding transcription factor activity);GO:0010200(response to chitin);GO:0005623(cell);GO:0010033(response to organic substance);GO:0050896(response to stimulus);GO:0001067(regulatory region nucleic acid binding);GO:0043227(m…	ko04144(Endocytosis)
PC-3p-13278_910	XM_016086467.2	748	768	759	-37	-25.1	0.678378	10.5	5-12,764-757;14-20,755-749	1-4,768-765[UP5];13-13,756-756[SIL];21-21,748-748[UP3]	.(((((((.((((((((....&....)))))))).))))))).	CCCAAGAGGAGCUUGCUGUAC&UUUUGGCAAGCUGUUCUUGGC	1	32.4181	4	1	Output/R24h/cleaveLand_result/t_plot/PC-3p-13278_910_XM_016086467.2_759_TPlot.pdf	0	0	NA	NA	NA	32.4181	0	Inf	up	1.2429e-08	1.41251e-08	yes	GO:0034357(photosynthetic membrane);GO:0044435(plastid part);GO:0031976(plastid thylakoid);GO:0044422(organelle part);GO:0043229(intracellular organelle);GO:0043167(ion binding);GO:0009534(chloroplast thylakoid);GO:0043168(anion binding);GO:0044444(cytoplasmic part);GO:0009536(plastid);GO:0031406(carboxylic acid binding);GO:0044424(intracellular part);GO:0044436(thylakoid part);GO:0031984(organel…	ko01110(Biosynthesis of secondary metabolites);ko00500(Starch and sucrose metabolism);ko01100(Metabolic pathways)
PC-3p-13278_910	XM_016086676.2	208	226	219	-37	-26	0.702703	8.5	2-7,225-220;10-21,219-208	1-1,226-226[UP5];8-9,x-x[BULq]	((((((((((((--((((((.&.))))))..))))))))))))	GCCAAGGACAGC--GUCAGGC&UUUUGGCAAGCUGUUCUUGGC	3	97.2542	2	0.901318	Output/R24h/cleaveLand_result/t_plot/PC-3p-13278_910_XM_016086676.2_219_TPlot.pdf	1	39.6024	4	0.996403	Output/R0h/cleaveLand_result/t_plot/PC-3p-13278_910_XM_016086676.2_219_TPlot.pdf	97.2542	39.6024	1.29617	up	8.2959e-07	9.29693e-07	yes	GO:0006605(protein targeting);GO:0015197(peptide transporter activity);GO:0071705(nitrogen compound transport);GO:0046907(intracellular transport);GO:0071702(organic substance transport);GO:0022857(transmembrane transporter activity);GO:0005215(transporter activity);GO:0006886(intracellular protein transport);GO:0045184(establishment of protein localization);GO:0051649(establishment of localizati…	ko04141(Protein processing in endoplasmic reticulum);ko03060(Protein export);ko04145(Phagosome)
PC-3p-13278_910	XM_016086677.2	208	226	219	-37	-26	0.702703	8.5	2-7,225-220;10-21,219-208	1-1,226-226[UP5];8-9,x-x[BULq]	((((((((((((--((((((.&.))))))..))))))))))))	GCCAAGGACAGC--GUCAGGC&UUUUGGCAAGCUGUUCUUGGC	1	32.4181	4	0.999343	Output/R24h/cleaveLand_result/t_plot/PC-3p-13278_910_XM_016086677.2_219_TPlot.pdf	3	118.807	3	0.362294	Output/R0h/cleaveLand_result/t_plot/PC-3p-13278_910_XM_016086677.2_219_TPlot.pdf	32.4181	118.807	-1.87375	down	2.1365e-12	9.04024e-12	yes	GO:0006605(protein targeting);GO:0015197(peptide transporter activity);GO:0071705(nitrogen compound transport);GO:0046907(intracellular transport);GO:0071702(organic substance transport);GO:0022857(transmembrane transporter activity);GO:0005215(transporter activity);GO:0006886(intracellular protein transport);GO:0045184(establishment of protein localization);GO:0051649(establishment of localizati…	ko04141(Protein processing in endoplasmic reticulum);ko03060(Protein export);ko04145(Phagosome)
PC-3p-13278_910	XM_016088238.2	618	649	629	-37	-24.4	0.659459	24.5	2-6,648-644;7-8,640-639;9-21,630-618	1-1,649-649[UP5];x-x,643-641[BULt];x-x,638-631[BULt]	(((((((((((((........((...(((((.&.)))))---))--------)))))))))))))	GCCAAGAGCAGCUAUACAUUAUGUAACCAGAG&UUUUGG---CA--------AGCUGUUCUUGGC	2	64.8361	2	0.999964	Output/R24h/cleaveLand_result/t_plot/PC-3p-13278_910_XM_016088238.2_629_TPlot.pdf	1	39.6024	4	1	Output/R0h/cleaveLand_result/t_plot/PC-3p-13278_910_XM_016088238.2_629_TPlot.pdf	64.8361	39.6024	0.71121	up	0.01354	0.0144021	yes	NA	ko04141(Protein processing in endoplasmic reticulum);ko00510(N-Glycan biosynthesis);ko01100(Metabolic pathways)
PC-3p-13278_910	XM_016088516.2	389	410	400	-37	-24.7	0.667568	9	2-5,409-406;6-12,404-398;14-16,396-394;19-21,391-389	1-1,410-410[UP5];x-x,405-405[BULt];13-13,397-397[SIL];17-18,393-392[SIL]	(((..(((.(((((((.((((.&.))))-))))))).)))..)))	GCCUUGAAGGGCUUGCACAGGC&UUUUG-GCAAGCUGUUCUUGGC	0	0	NA	NA	NA	1	39.6024	4	1	Output/R0h/cleaveLand_result/t_plot/PC-3p-13278_910_XM_016088516.2_400_TPlot.pdf	0	39.6024	-Inf	down	3.1118e-10	6.0515e-10	yes	GO:0046872(metal ion binding);GO:0044424(intracellular part);GO:0009059(macromolecule biosynthetic process);GO:0043170(macromolecule metabolic process);GO:0044464(cell part);GO:0005622(intracellular);GO:0043167(ion binding);GO:0009058(biosynthetic process);GO:0000287(magnesium ion binding);GO:0010467(gene expression);GO:0043168(anion binding);GO:0006432(phenylalanyl-tRNA aminoacylation);GO:004648…	ko00970(Aminoacyl-tRNA biosynthesis)
PC-3p-13278_910	XM_016088529.2	405	426	416	-37	-24.7	0.667568	9	2-5,425-422;6-12,420-414;14-16,412-410;19-21,407-405	1-1,426-426[UP5];x-x,421-421[BULt];13-13,413-413[SIL];17-18,409-408[SIL]	(((..(((.(((((((.((((.&.))))-))))))).)))..)))	GCCUUGAAGGGCUUGCACAGGC&UUUUG-GCAAGCUGUUCUUGGC	0	0	NA	NA	NA	1	39.6024	4	1	Output/R0h/cleaveLand_result/t_plot/PC-3p-13278_910_XM_016088529.2_416_TPlot.pdf	0	39.6024	-Inf	down	3.1118e-10	6.0515e-10	yes	GO:0046872(metal ion binding);GO:0044424(intracellular part);GO:0009059(macromolecule biosynthetic process);GO:0043170(macromolecule metabolic process);GO:0044464(cell part);GO:0005622(intracellular);GO:0043167(ion binding);GO:0009058(biosynthetic process);GO:0000287(magnesium ion binding);GO:0010467(gene expression);GO:0043168(anion binding);GO:0006432(phenylalanyl-tRNA aminoacylation);GO:004648…	ko00970(Aminoacyl-tRNA biosynthesis)
PC-3p-13278_910	XM_016089263.2	1655	1679	1667	-37	-24.9	0.672973	16	5-8,1675-1672;9-12,1668-1665;13-21,1663-1655	1-4,1679-1676[UP5];x-x,1671-1669[BULt];x-x,1664-1664[BULt]	(((((((((.((((...((((....&....))))---))))-)))))))))	GCCAAGGGCAAGCUAAGUGCCUGUG&UUUUGGCA---AGCU-GUUCUUGGC	8	259.345	2	0.997581	Output/R24h/cleaveLand_result/t_plot/PC-3p-13278_910_XM_016089263.2_1667_TPlot.pdf	3	118.807	2	0.987976	Output/R0h/cleaveLand_result/t_plot/PC-3p-13278_910_XM_016089263.2_1667_TPlot.pdf	259.345	118.807	1.12625	up	4.9126e-13	2.13138e-12	yes	GO:0031224(intrinsic component of membrane);GO:0044425(membrane part);GO:0016020(membrane);GO:0016021(integral component of membrane);GO:0005488(binding);GO:0008289(lipid binding)	NA
PC-3p-13278_910	XM_016089333.2	932	953	944	-37	-26.6	0.718919	5.5	1-18,953-936;20-21,933-932	19-19,935-934[AILt]	((..((((((((((((((((((&))))))))))))))))))-.))	GUGGGAGAACGGUUUGCCAAAG&UUUUGGCAAGCUGUUCUU-GGC	1	32.4181	4	0.989416	Output/R24h/cleaveLand_result/t_plot/PC-3p-13278_910_XM_016089333.2_944_TPlot.pdf	0	0	NA	NA	NA	32.4181	0	Inf	up	1.2429e-08	1.41251e-08	yes	GO:0003824(catalytic activity);GO:0046834(lipid phosphorylation);GO:0008152(metabolic process);GO:0044237(cellular metabolic process);GO:0006644(phospholipid metabolic process);GO:0046486(glycerolipid metabolic process);GO:0030258(lipid modification);GO:0016772(transferase activity, transferring phosphorus-containing groups);GO:0006629(lipid metabolic process);GO:0016740(transferase activity);GO:…	ko00562(Inositol phosphate metabolism);ko04070(Phosphatidylinositol signaling system);ko04144(Endocytosis);ko01100(Metabolic pathways);ko00531(Glycosaminoglycan degradation)
PC-3p-13278_910	XM_016089500.2	632	653	644	-37	-24.9	0.672973	11	5-10,649-644;11-19,642-634	1-4,653-650[UP5];x-x,643-643[BULt];20-21,633-632[UP3]	..(((((((((.((((((....&....))))))-)))))))))..	CACAAGAACAGACUUGCCUCCU&UUUUGGCAAG-CUGUUCUUGGC	3	97.2542	3	0.824368	Output/R24h/cleaveLand_result/t_plot/PC-3p-13278_910_XM_016089500.2_644_TPlot.pdf	0	0	NA	NA	NA	97.2542	0	Inf	up	6.0829e-23	7.372e-22	yes	GO:0098869(cellular oxidant detoxification);GO:0043167(ion binding);GO:0044237(cellular metabolic process);GO:0044248(cellular catabolic process);GO:0072593(reactive oxygen species metabolic process);GO:0009987(cellular process);GO:0050896(response to stimulus);GO:0006950(response to stress);GO:0042744(hydrogen peroxide catabolic process);GO:0005488(binding);GO:0042743(hydrogen peroxide metabolic…	ko00940(Phenylpropanoid biosynthesis);ko01110(Biosynthesis of secondary metabolites);ko01100(Metabolic pathways)
PC-3p-13278_910	XM_016089536.2	1433	1455	1446	-37	-24.6	0.664865	12	4-11,1452-1445;12-20,1442-1434	1-3,1455-1453[UP5];x-x,1444-1443[BULt];21-21,1433-1433[UP3]	.(((((((((..((((((((...&...))))))))--))))))))).	ACCAGGAGCAUCGUUUGCCAUAA&UUUUGGCAAGC--UGUUCUUGGC	2	64.8361	1	0.390348	Output/R24h/cleaveLand_result/t_plot/PC-3p-13278_910_XM_016089536.2_1446_TPlot.pdf	0	0	NA	NA	NA	64.8361	0	Inf	up	8.1306e-16	3.55976e-15	yes	GO:0031967(organelle envelope);GO:0009507(chloroplast);GO:0044422(organelle part);GO:0003824(catalytic activity);GO:0009526(plastid envelope);GO:0031975(envelope);GO:0009941(chloroplast envelope);GO:0005737(cytoplasm);GO:0009536(plastid);GO:0044434(chloroplast part);GO:0043226(organelle);GO:0016787(hydrolase activity);GO:0044424(intracellular part);GO:0005623(cell);GO:0043227(membrane-bounded org…	NA
PC-3p-13278_910	XM_016089748.2	154	174	165	-37	-25.7	0.694595	9.5	4-7,171-168;9-17,166-158;19-21,156-154	1-3,174-172[UP5];8-8,167-167[SIL];18-18,157-157[SIL]	(((.(((((((((.((((...&...)))).))))))))).)))	GCUUGGAGCAGCUCGCCAUUG&UUUUGGCAAGCUGUUCUUGGC	1	32.4181	4	0.999911	Output/R24h/cleaveLand_result/t_plot/PC-3p-13278_910_XM_016089748.2_165_TPlot.pdf	0	0	NA	NA	NA	32.4181	0	Inf	up	1.2429e-08	1.41251e-08	yes	GO:0043604(amide biosynthetic process);GO:0003723(RNA binding);GO:0043232(intracellular non-membrane-bounded organelle);GO:0005840(ribosome);GO:0003735(structural constituent of ribosome);GO:0019538(protein metabolic process);GO:0044237(cellular metabolic process);GO:1901363(heterocyclic compound binding);GO:0044260(cellular macromolecule metabolic process);GO:0006518(peptide metabolic process);G…	ko00190(Oxidative phosphorylation);ko01100(Metabolic pathways)
PC-3p-13278_910	XM_016091402.2	2147	2169	2159	-37	-25.1	0.678378	9	2-7,2168-2163;8-14,2161-2155;16-21,2152-2147	1-1,2169-2169[UP5];x-x,2162-2162[BULt];15-15,2154-2153[AILt]	((((((..(((((((.((((((.&.))))))-)))))))-.))))))	GCCAGGUUGCAGCUUGGUCGAGU&UUUUGGC-AAGCUGU-UCUUGGC	1	32.4181	4	1	Output/R24h/cleaveLand_result/t_plot/PC-3p-13278_910_XM_016091402.2_2159_TPlot.pdf	0	0	NA	NA	NA	32.4181	0	Inf	up	1.2429e-08	1.41251e-08	yes	GO:0043169(cation binding);GO:0043167(ion binding);GO:0008270(zinc ion binding);GO:0046872(metal ion binding);GO:0005488(binding);GO:0046914(transition metal ion binding)	NA
PC-3p-13278_910	XM_016092236.2	1190	1211	1202	-37	-24.1	0.651351	10.5	4-11,1208-1201;13-16,1199-1196;17-21,1194-1190	1-3,1211-1209[UP5];12-12,1200-1200[SIL];x-x,1195-1195[BULt]	(((((.((((.((((((((...&...)))))))).))))-)))))	GCCAGUGAACUGUUUGCCGCCA&UUUUGGCAAGCUGUUC-UUGGC	2	64.8361	2	0.999992	Output/R24h/cleaveLand_result/t_plot/PC-3p-13278_910_XM_016092236.2_1202_TPlot.pdf	0	0	NA	NA	NA	64.8361	0	Inf	up	8.1306e-16	3.55976e-15	yes	NA	NA
PC-3p-13278_910	XM_016092496.1	549	571	560	-37	-25.9	0.7	9.5	3-8,569-564;9-14,561-556;16-21,554-549	1-2,571-570[UP5];x-x,563-562[BULt];15-15,555-555[SIL]	((((((.((((((..((((((..&..))))))--)))))).))))))	GCCAAGUGCAGUUAAUGCCAAUG&UUUUGGCA--AGCUGUUCUUGGC	0	0	NA	NA	NA	1	39.6024	4	0.998075	Output/R0h/cleaveLand_result/t_plot/PC-3p-13278_910_XM_016092496.1_560_TPlot.pdf	0	39.6024	-Inf	down	3.1118e-10	6.0515e-10	yes	GO:0043650(dicarboxylic acid biosynthetic process);GO:0043648(dicarboxylic acid metabolic process);GO:0044283(small molecule biosynthetic process);GO:0009089(lysine biosynthetic process via diaminopimelate);GO:0005737(cytoplasm);GO:0006807(nitrogen compound metabolic process);GO:0008152(metabolic process);GO:0009987(cellular process);GO:0046394(carboxylic acid biosynthetic process);GO:0005622(int…	ko01230(Biosynthesis of amino acids);ko00261(Monobactam biosynthesis);ko01110(Biosynthesis of secondary metabolites);ko00300(Lysine biosynthesis);ko01100(Metabolic pathways)
PC-3p-13278_910	XM_016092520.2	1305	1331	1322	-37	-26.4	0.713514	13	4-14,1328-1318;15-21,1311-1305	1-3,1331-1329[UP5];x-x,1317-1312[BULt]	(((((((......(((((((((((...&...)))))))))))------)))))))	GCCAAGAAGUGCAACGGUUUGCCAUUA&UUUUGGCAAGCUGU------UCUUGGC	0	0	NA	NA	NA	1	39.6024	4	0.982509	Output/R0h/cleaveLand_result/t_plot/PC-3p-13278_910_XM_016092520.2_1322_TPlot.pdf	0	39.6024	-Inf	down	3.1118e-10	6.0515e-10	yes	NA	NA
PC-3p-13278_910	XM_016094590.2	5090	5118	5101	-37	-24.8	0.67027	18.5	1-9,5118-5110;10-19,5101-5092	x-x,5109-5102[BULt];20-21,5091-5090[UP3]	..((((((((((........(((((((((&)))))))))--------))))))))))..	AACAAGAGCAGCAGCAAGUAUUGCCAAAA&UUUUGGCAA--------GCUGUUCUUGGC	2	64.8361	3	0.856955	Output/R24h/cleaveLand_result/t_plot/PC-3p-13278_910_XM_016094590.2_5101_TPlot.pdf	0	0	NA	NA	NA	64.8361	0	Inf	up	8.1306e-16	3.55976e-15	yes	GO:0070887(cellular response to chemical stimulus);GO:0071365(cellular response to auxin stimulus);GO:1901363(heterocyclic compound binding);GO:0005634(nucleus);GO:0051716(cellular response to stimulus);GO:0060255(regulation of macromolecule metabolic process);GO:0031326(regulation of cellular biosynthetic process);GO:0042221(response to chemical);GO:0051252(regulation of RNA metabolic process);G…	ko04075(Plant hormone signal transduction)
PC-3p-13278_910	XM_016095043.2	64	87	75	-37	-24.82	0.670811	18.5	5-7,83-81;10-21,75-64	1-4,87-84[UP5];8-9,80-76[AILt]	((((((((((((.....(((....&....)))---..))))))))))))	GCCAAGGACAGCGUAAGGCUCGUC&UUUUGGC---AAGCUGUUCUUGGC	1	32.4181	4	1	Output/R24h/cleaveLand_result/t_plot/PC-3p-13278_910_XM_016095043.2_75_TPlot.pdf	0	0	NA	NA	NA	32.4181	0	Inf	up	1.2429e-08	1.41251e-08	yes	GO:1904680(peptide transmembrane transporter activity);GO:0070727(cellular macromolecule localization);GO:0005623(cell);GO:0071702(organic substance transport);GO:0022884(macromolecule transmembrane transporter activity);GO:0034613(cellular protein localization);GO:0071705(nitrogen compound transport);GO:0005215(transporter activity);GO:0015399(primary active transmembrane transporter activity);G…	ko04145(Phagosome);ko03060(Protein export);ko04141(Protein processing in endoplasmic reticulum)
PC-3p-13278_910	XM_016095558.2	1381	1402	1394	-37	-25.3	0.683784	8	1-7,1402-1396;10-18,1394-1386;19-21,1383-1381	8-9,1395-1395[AILq];x-x,1385-1384[BULt]	(((..(((((((((.-(((((((&)))))))..)))))))))--)))	GCCUCAAGAACAGUG-GCCAGAA&UUUUGGCAAGCUGUUCUU--GGC	0	0	NA	NA	NA	2	79.2048	2	0.959423	Output/R0h/cleaveLand_result/t_plot/PC-3p-13278_910_XM_016095558.2_1394_TPlot.pdf	0	79.2048	-Inf	down	5.5905e-19	3.88279e-18	yes	GO:0016787(hydrolase activity);GO:0003824(catalytic activity);GO:0008152(metabolic process)	ko04075(Plant hormone signal transduction)
PC-3p-13278_910	XM_016096284.2	2762	2783	2774	-37	-25.7	0.694595	10	5-14,2779-2770;17-21,2766-2762	1-4,2783-2780[UP5];15-16,2769-2767[AILt]	(((((...((((((((((....&....))))))))))-..)))))	GCCAAAUUACAGCUUGCCUCCC&UUUUGGCAAGCUGU-UCUUGGC	1	32.4181	4	0.99995	Output/R24h/cleaveLand_result/t_plot/PC-3p-13278_910_XM_016096284.2_2774_TPlot.pdf	0	0	NA	NA	NA	32.4181	0	Inf	up	1.2429e-08	1.41251e-08	yes	GO:0004553(hydrolase activity, hydrolyzing O-glycosyl compounds);GO:0005488(binding);GO:0043170(macromolecule metabolic process);GO:0004559(alpha-mannosidase activity);GO:0006013(mannose metabolic process);GO:0019318(hexose metabolic process);GO:0044267(cellular protein metabolic process);GO:1901135(carbohydrate derivative metabolic process);GO:0015923(mannosidase activity);GO:0019538(protein met…	ko00511(Other glycan degradation)
PC-3p-13278_910	XM_016097176.2	1003	1028	1020	-37	-25.4	0.686486	9.5	1-9,1028-1020;11-17,1019-1013;18-21,1006-1003	10-10,x-x[BULq];x-x,1012-1007[BULt]	((((......(((((((-(((((((((&))))))))).)))))))------))))	GCCACAUAAUAGAGCAG-UUGCCAGAA&UUUUGGCAAGCUGUUCU------UGGC	0	0	NA	NA	NA	1	39.6024	4	0.999959	Output/R0h/cleaveLand_result/t_plot/PC-3p-13278_910_XM_016097176.2_1020_TPlot.pdf	0	39.6024	-Inf	down	3.1118e-10	6.0515e-10	yes	GO:0043226(organelle);GO:0071822(protein complex subunit organization);GO:0009534(chloroplast thylakoid);GO:0009657(plastid organization);GO:0044424(intracellular part);GO:0031975(envelope);GO:0009725(response to hormone);GO:0016020(membrane);GO:0055035(plastid thylakoid membrane);GO:0022607(cellular component assembly);GO:0009579(thylakoid);GO:0031976(plastid thylakoid);GO:0070271(protein comple…	NA
PC-3p-13278_910	XM_016097785.2	533	551	543	-37	-24.4	0.659459	11.5	5-8,547-544;10-14,543-539;16-21,538-533	1-4,551-548[UP5];9-9,x-x[BULq];15-15,x-x[BULq]	((((((-(((((-((((....&....)))).))))).))))))	GCCAAG-GCGGC-UGCCGUGG&UUUUGGCAAGCUGUUCUUGGC	0	0	NA	NA	NA	2	79.2048	2	0.999414	Output/R0h/cleaveLand_result/t_plot/PC-3p-13278_910_XM_016097785.2_543_TPlot.pdf	0	79.2048	-Inf	down	5.5905e-19	3.88279e-18	yes	NA	NA
PC-3p-13278_910	XM_016099025.2	215	235	226	-37	-25	0.675676	8.5	3-12,233-224;14-21,222-215	1-2,235-234[UP5];13-13,223-223[SIL]	((((((((.((((((((((..&..)))))))))).))))))))	GCUAGGAGGAGCUUGUUAGCU&UUUUGGCAAGCUGUUCUUGGC	0	0	NA	NA	NA	1	39.6024	4	0.999999	Output/R0h/cleaveLand_result/t_plot/PC-3p-13278_910_XM_016099025.2_226_TPlot.pdf	0	39.6024	-Inf	down	3.1118e-10	6.0515e-10	yes	GO:0016829(lyase activity);GO:0046872(metal ion binding);GO:0009057(macromolecule catabolic process);GO:0071704(organic substance metabolic process);GO:0005975(carbohydrate metabolic process);GO:0043170(macromolecule metabolic process);GO:0016837(carbon-oxygen lyase activity, acting on polysaccharides);GO:0043169(cation binding);GO:0000272(polysaccharide catabolic process);GO:0016835(carbon-oxyge…	ko00040(Pentose and glucuronate interconversions)
PC-3p-13278_910	XM_016099696.2	449	469	460	-37	-25.2	0.681081	5.5	1-11,469-459;13-14,457-456;16-21,454-449	12-12,458-458[SIL];15-15,455-455[SIL]	((((((.((.(((((((((((&))))))))))).)).))))))	GUCAGGCAUUGCUUGCCAAGA&UUUUGGCAAGCUGUUCUUGGC	1	32.4181	4	0.999999	Output/R24h/cleaveLand_result/t_plot/PC-3p-13278_910_XM_016099696.2_460_TPlot.pdf	0	0	NA	NA	NA	32.4181	0	Inf	up	1.2429e-08	1.41251e-08	yes	GO:0016835(carbon-oxygen lyase activity);GO:0004834(tryptophan synthase activity);GO:1901564(organonitrogen compound metabolic process);GO:0044281(small molecule metabolic process);GO:0042401(cellular biogenic amine biosynthetic process);GO:0016053(organic acid biosynthetic process);GO:0008652(cellular amino acid biosynthetic process);GO:0046483(heterocycle metabolic process);GO:0006576(cellular …	ko00260(Glycine, serine and threonine metabolism);ko00400(Phenylalanine, tyrosine and tryptophan biosynthesis);ko01110(Biosynthesis of secondary metabolites);ko01100(Metabolic pathways);ko01230(Biosynthesis of amino acids)
PC-3p-13278_910	XM_016099777.2	768	799	787	-37	-25.5	0.689189	15.5	1-8,799-792;9-17,788-780;18-21,771-768	x-x,791-789[BULt];x-x,779-772[BULt]	((((........(((((((((...((((((((&))))))))---)))))))))--------))))	GCCACGGAUAGUAGAACAGCUUAUUGCCGAAG&UUUUGGCA---AGCUGUUCU--------UGGC	2	64.8361	2	0.9794	Output/R24h/cleaveLand_result/t_plot/PC-3p-13278_910_XM_016099777.2_787_TPlot.pdf	0	0	NA	NA	NA	64.8361	0	Inf	up	8.1306e-16	3.55976e-15	yes	NA	NA
PC-3p-13278_910	XM_016100763.2	628	646	639	-37	-25.6	0.691892	8.5	2-6,645-641;9-21,640-628	1-1,646-646[UP5];7-8,x-x[BULq]	(((((((((((((--(((((.&.)))))..)))))))))))))	GCCGGGGACGGCU--CCAGAC&UUUUGGCAAGCUGUUCUUGGC	1	32.4181	4	0.999985	Output/R24h/cleaveLand_result/t_plot/PC-3p-13278_910_XM_016100763.2_639_TPlot.pdf	0	0	NA	NA	NA	32.4181	0	Inf	up	1.2429e-08	1.41251e-08	yes	GO:1903506(regulation of nucleic acid-templated transcription);GO:0009889(regulation of biosynthetic process);GO:1901265(nucleoside phosphate binding);GO:0009890(negative regulation of biosynthetic process);GO:0031326(regulation of cellular biosynthetic process);GO:0019222(regulation of metabolic process);GO:0043168(anion binding);GO:0045934(negative regulation of nucleobase-containing compound m…	ko00130(Ubiquinone and other terpenoid-quinone biosynthesis);ko01110(Biosynthesis of secondary metabolites)
PC-3p-13278_910	XM_016101909.2	457	478	469	-37	-25.6	0.691892	8.5	3-8,476-471;10-17,469-462;18-21,460-457	1-2,478-477[UP5];9-9,470-470[SIL];x-x,461-461[BULt]	((((.((((((((.((((((..&..)))))).))))))))-))))	GCCAGAGAGCAGCGUGUCGACG&UUUUGGCAAGCUGUUCU-UGGC	0	0	NA	NA	NA	1	39.6024	4	0.999856	Output/R0h/cleaveLand_result/t_plot/PC-3p-13278_910_XM_016101909.2_469_TPlot.pdf	0	39.6024	-Inf	down	3.1118e-10	6.0515e-10	yes	GO:0009987(cellular process);GO:0006048(UDP-N-acetylglucosamine biosynthetic process);GO:1901135(carbohydrate derivative metabolic process);GO:0071704(organic substance metabolic process);GO:0044249(cellular biosynthetic process);GO:1901360(organic cyclic compound metabolic process);GO:0044464(cell part);GO:0008152(metabolic process);GO:0006725(cellular aromatic compound metabolic process);GO:000…	ko01100(Metabolic pathways);ko00520(Amino sugar and nucleotide sugar metabolism)
PC-3p-13278_910	XM_016102397.2	1327	1347	1338	-37	-25.4	0.686486	7	2-5,1346-1343;7-16,1341-1332;18-21,1330-1327	1-1,1347-1347[UP5];6-6,1342-1342[SIL];17-17,1331-1331[SIL]	((((.((((((((((.((((.&.)))).)))))))))).))))	GUCGCGAACAGCUUGGCGGAU&UUUUGGCAAGCUGUUCUUGGC	4	129.672	2	0.985456	Output/R24h/cleaveLand_result/t_plot/PC-3p-13278_910_XM_016102397.2_1338_TPlot.pdf	0	0	NA	NA	NA	129.672	0	Inf	up	4.813e-30	1.15989e-28	yes	GO:2000112(regulation of cellular macromolecule biosynthetic process);GO:1903506(regulation of nucleic acid-templated transcription);GO:0009867(jasmonic acid mediated signaling pathway);GO:0031323(regulation of cellular metabolic process);GO:0097305(response to alcohol);GO:2000241(regulation of reproductive process);GO:0065007(biological regulation);GO:0009968(negative regulation of signal transd…	ko04075(Plant hormone signal transduction)
PC-3p-13278_910	XM_016105742.2	723	747	734	-37	-25.56	0.690811	19	4-7,744-741;10-21,734-723	1-3,747-745[UP5];8-9,740-735[AILt]	((((((((((((......((((...&...))))----..))))))))))))	GCCAGGAGCAGUCCUGUGGCCACCG&UUUUGGC----AAGCUGUUCUUGGC	1	32.4181	4	0.99999	Output/R24h/cleaveLand_result/t_plot/PC-3p-13278_910_XM_016105742.2_734_TPlot.pdf	1	39.6024	4	0.999904	Output/R0h/cleaveLand_result/t_plot/PC-3p-13278_910_XM_016105742.2_734_TPlot.pdf	32.4181	39.6024	-0.28879	down	0.39723	0.398704	yes	NA	NA
PC-3p-13278_910	XM_016107779.2	741	760	751	-37	-25.3	0.683784	10	5-8,756-753;10-17,751-744;19-21,743-741	1-4,760-757[UP5];9-9,752-752[SIL];18-18,x-x[BULq]	(((-((((((((.((((....&....)))).)))))))).)))	GCC-AGAACAGCGUGCCCUUC&UUUUGGCAAGCUGUUCUUGGC	0	0	NA	NA	NA	1	39.6024	4	0.999978	Output/R0h/cleaveLand_result/t_plot/PC-3p-13278_910_XM_016107779.2_751_TPlot.pdf	0	39.6024	-Inf	down	3.1118e-10	6.0515e-10	yes	GO:0009987(cellular process);GO:0016021(integral component of membrane);GO:0016192(vesicle-mediated transport);GO:0044425(membrane part);GO:0098796(membrane protein complex);GO:0044444(cytoplasmic part);GO:0022406(membrane docking);GO:0016020(membrane);GO:0071702(organic substance transport);GO:0008104(protein localization);GO:0016043(cellular component organization);GO:0046907(intracellular tran…	ko04130(SNARE interactions in vesicular transport);ko04145(Phagosome)
PC-3p-13278_910	XM_016108185.2	1151	1171	1161	-37	-24.5	0.662162	6.5	1-9,1171-1163;10-11,1161-1160;13-20,1159-1152	x-x,1162-1162[BULt];12-12,x-x[BULq];21-21,1151-1151[UP3]	.((((((((-((.(((((((((&)))))))))-)).)))))))).	UCCAAGAAC-GCAUUGCCAAGG&UUUUGGCAA-GCUGUUCUUGGC	1	32.4181	4	1	Output/R24h/cleaveLand_result/t_plot/PC-3p-13278_910_XM_016108185.2_1161_TPlot.pdf	0	0	NA	NA	NA	32.4181	0	Inf	up	1.2429e-08	1.41251e-08	yes	GO:0044424(intracellular part);GO:0043169(cation binding);GO:0005622(intracellular);GO:0044464(cell part);GO:0005488(binding);GO:0005737(cytoplasm);GO:0046872(metal ion binding);GO:0005623(cell);GO:0043167(ion binding)	NA
PC-3p-13278_910	XM_016108192.2	1175	1195	1185	-37	-24.5	0.662162	6.5	1-9,1195-1187;10-11,1185-1184;13-20,1183-1176	x-x,1186-1186[BULt];12-12,x-x[BULq];21-21,1175-1175[UP3]	.((((((((-((.(((((((((&)))))))))-)).)))))))).	UCCAAGAAC-GCAUUGCCAAGG&UUUUGGCAA-GCUGUUCUUGGC	1	32.4181	4	1	Output/R24h/cleaveLand_result/t_plot/PC-3p-13278_910_XM_016108192.2_1185_TPlot.pdf	0	0	NA	NA	NA	32.4181	0	Inf	up	1.2429e-08	1.41251e-08	yes	GO:0044424(intracellular part);GO:0043169(cation binding);GO:0005622(intracellular);GO:0044464(cell part);GO:0005488(binding);GO:0005737(cytoplasm);GO:0046872(metal ion binding);GO:0005623(cell);GO:0043167(ion binding)	NA
PC-3p-13278_910	XM_016108263.2	529	550	540	-37	-25.1	0.678378	7.5	1-7,550-544;9-12,541-538;14-21,536-529	8-8,543-542[AILt];13-13,537-537[SIL]	((((((((.((((..(((((((&)))))))-.)))).))))))))	GCCGGGAAAAGCUCAGCCAGAG&UUUUGGC-AAGCUGUUCUUGGC	2	64.8361	3	0.766099	Output/R24h/cleaveLand_result/t_plot/PC-3p-13278_910_XM_016108263.2_540_TPlot.pdf	4	158.41	2	0.981145	Output/R0h/cleaveLand_result/t_plot/PC-3p-13278_910_XM_016108263.2_540_TPlot.pdf	64.8361	158.41	-1.28879	down	3.7754e-10	7.30474e-10	yes	NA	ko04075(Plant hormone signal transduction);ko01100(Metabolic pathways);ko01230(Biosynthesis of amino acids);ko01110(Biosynthesis of secondary metabolites);ko00020(Citrate cycle (TCA cycle));ko00630(Glyoxylate and dicarboxylate metabolism);ko01210(2-Oxocarboxylic acid metabolism);ko01200(Carbon metabolism);ko04016(MAPK signaling pathway - plant)
PC-3p-13278_910	XM_016108639.2	1800	1819	1811	-37	-25.1	0.678378	6	1-8,1819-1812;10-12,1811-1809;14-21,1807-1800	9-9,x-x[BULq];13-13,1808-1808[SIL]	((((((((.(((-((((((((&)))))))).))).))))))))	GCUAAGAGAGGC-UGCCAAGA&UUUUGGCAAGCUGUUCUUGGC	1	32.4181	4	1	Output/R24h/cleaveLand_result/t_plot/PC-3p-13278_910_XM_016108639.2_1811_TPlot.pdf	0	0	NA	NA	NA	32.4181	0	Inf	up	1.2429e-08	1.41251e-08	yes	GO:0005488(binding);GO:1901363(heterocyclic compound binding);GO:1901265(nucleoside phosphate binding);GO:0032555(purine ribonucleotide binding);GO:0005524(ATP binding);GO:0043167(ion binding);GO:0097159(organic cyclic compound binding);GO:0003824(catalytic activity);GO:0036094(small molecule binding);GO:0035639(purine ribonucleoside triphosphate binding);GO:0016787(hydrolase activity);GO:0030554…	NA
PC-3p-13278_910	XM_016109551.2	1702	1722	1713	-37	-24.7	0.667568	7.5	1-5,1722-1718;7-17,1716-1706;19-21,1704-1702	6-6,1717-1717[SIL];18-18,1705-1705[SIL]	(((.(((((((((((.(((((&))))).))))))))))).)))	GCUUAGAACGGUUUGGCGAGA&UUUUGGCAAGCUGUUCUUGGC	1	32.4181	4	1	Output/R24h/cleaveLand_result/t_plot/PC-3p-13278_910_XM_016109551.2_1713_TPlot.pdf	0	0	NA	NA	NA	32.4181	0	Inf	up	1.2429e-08	1.41251e-08	yes	GO:0046483(heterocycle metabolic process);GO:0030554(adenyl nucleotide binding);GO:0009987(cellular process);GO:0044424(intracellular part);GO:0048731(system development);GO:0035670(plant-type ovary development);GO:0048437(floral organ development);GO:0043227(membrane-bounded organelle);GO:0048438(floral whorl development);GO:0097367(carbohydrate derivative binding);GO:0022414(reproductive proces…	ko00970(Aminoacyl-tRNA biosynthesis)
PC-3p-13278_910	XM_016111091.2	293	314	305	-37	-25.3	0.683784	9	4-13,311-302;14-20,300-294	1-3,314-312[UP5];x-x,301-301[BULt];21-21,293-293[UP3]	.(((((((.((((((((((...&...))))))))))-))))))).	ACCGAGGACCAGCUUGUCACCC&UUUUGGCAAGCUG-UUCUUGGC	0	0	NA	NA	NA	3	118.807	2	0.963079	Output/R0h/cleaveLand_result/t_plot/PC-3p-13278_910_XM_016111091.2_305_TPlot.pdf	0	118.807	-Inf	down	1.1501e-27	2.02633e-26	yes	GO:0004471(malate dehydrogenase (decarboxylating) (NAD+) activity);GO:0050662(coenzyme binding);GO:0036094(small molecule binding);GO:0006082(organic acid metabolic process);GO:1901363(heterocyclic compound binding);GO:0016614(oxidoreductase activity, acting on CH-OH group of donors);GO:1901265(nucleoside phosphate binding);GO:0004470(malic enzyme activity);GO:0043648(dicarboxylic acid metabolic …	ko01100(Metabolic pathways);ko00620(Pyruvate metabolism);ko01200(Carbon metabolism);ko00710(Carbon fixation in photosynthetic organisms)
PC-3p-13278_910	XM_016111091.2	608	630	621	-37	-24.2	0.654054	9.5	1-12,630-619;13-15,616-614;18-21,611-608	x-x,618-617[BULt];16-17,613-612[SIL]	((((..(((..((((((((((((&))))))))))))--)))..))))	GCCGUCGGCGAGGCUUGCCAGAA&UUUUGGCAAGCU--GUUCUUGGC	0	0	NA	NA	NA	2	79.2048	3	0.88277	Output/R0h/cleaveLand_result/t_plot/PC-3p-13278_910_XM_016111091.2_621_TPlot.pdf	0	79.2048	-Inf	down	5.5905e-19	3.88279e-18	yes	GO:0004471(malate dehydrogenase (decarboxylating) (NAD+) activity);GO:0050662(coenzyme binding);GO:0036094(small molecule binding);GO:0006082(organic acid metabolic process);GO:1901363(heterocyclic compound binding);GO:0016614(oxidoreductase activity, acting on CH-OH group of donors);GO:1901265(nucleoside phosphate binding);GO:0004470(malic enzyme activity);GO:0043648(dicarboxylic acid metabolic …	ko01100(Metabolic pathways);ko00620(Pyruvate metabolism);ko01200(Carbon metabolism);ko00710(Carbon fixation in photosynthetic organisms)
PC-3p-13278_910	XM_016111947.2	795	816	807	-37	-27.2	0.735135	5	2-13,815-804;14-17,802-799;19-21,797-795	1-1,816-816[UP5];x-x,803-803[BULt];18-18,798-798[SIL]	(((.((((.((((((((((((.&.))))))))))))-)))).)))	GUCCGGAAUCAGCUUGCCAGAU&UUUUGGCAAGCUG-UUCUUGGC	1	32.4181	4	0.928764	Output/R24h/cleaveLand_result/t_plot/PC-3p-13278_910_XM_016111947.2_807_TPlot.pdf	0	0	NA	NA	NA	32.4181	0	Inf	up	1.2429e-08	1.41251e-08	yes	GO:0046483(heterocycle metabolic process);GO:1901360(organic cyclic compound metabolic process);GO:0004518(nuclease activity);GO:0006139(nucleobase-containing compound metabolic process);GO:0003824(catalytic activity);GO:0044260(cellular macromolecule metabolic process);GO:0071704(organic substance metabolic process);GO:0033554(cellular response to stress);GO:0003677(DNA binding);GO:0016788(hydro…	NA
PC-3p-13278_910	XM_016112075.2	930	950	941	-37	-25.3	0.683784	10.5	5-12,946-939;15-21,936-930	1-4,950-947[UP5];13-14,938-937[SIL]	(((((((..((((((((....&....))))))))..)))))))	GCCAGGAUGAGCUUGCUCUUU&UUUUGGCAAGCUGUUCUUGGC	1	32.4181	4	0.999999	Output/R24h/cleaveLand_result/t_plot/PC-3p-13278_910_XM_016112075.2_941_TPlot.pdf	0	0	NA	NA	NA	32.4181	0	Inf	up	1.2429e-08	1.41251e-08	yes	GO:0016021(integral component of membrane);GO:0044425(membrane part);GO:0016020(membrane);GO:0031224(intrinsic component of membrane)	ko00240(Pyrimidine metabolism);ko01100(Metabolic pathways)
PC-3p-13278_910	XM_016112686.2	288	309	299	-37	-25.8	0.697297	12	5-9,305-301;10-21,299-288	1-4,309-306[UP5];x-x,300-300[BULt]	((((((((((((.(((((....&....)))))-))))))))))))	GCCAGGAGCAGCUUUGUUCCUC&UUUUGGCAA-GCUGUUCUUGGC	2	64.8361	2	0.939661	Output/R24h/cleaveLand_result/t_plot/PC-3p-13278_910_XM_016112686.2_299_TPlot.pdf	0	0	NA	NA	NA	64.8361	0	Inf	up	8.1306e-16	3.55976e-15	yes	NA	NA
PC-3p-13278_910	XM_016113330.2	3038	3057	3048	-37	-24.4	0.659459	7	2-15,3056-3043;19-21,3040-3038	1-1,3057-3057[UP5];16-18,3042-3041[AILq]	(((..-((((((((((((((.&.))))))))))))))...)))	GCUUU-AGCAGCUUGCCGGAC&UUUUGGCAAGCUGUUCUUGGC	1	32.4181	4	1	Output/R24h/cleaveLand_result/t_plot/PC-3p-13278_910_XM_016113330.2_3048_TPlot.pdf	0	0	NA	NA	NA	32.4181	0	Inf	up	1.2429e-08	1.41251e-08	yes	GO:0043167(ion binding);GO:0043231(intracellular membrane-bounded organelle);GO:0005488(binding);GO:0044464(cell part);GO:0008104(protein localization);GO:0005798(Golgi-associated vesicle);GO:0006888(ER to Golgi vesicle-mediated transport);GO:0098588(bounding membrane of organelle);GO:0051179(localization);GO:0071702(organic substance transport);GO:0098796(membrane protein complex);GO:0051649(est…	ko04141(Protein processing in endoplasmic reticulum)
PC-3p-13278_910	XM_016113911.2	275	299	290	-37	-27.8	0.751351	8.5	1-12,299-288;14-14,286-286;15-21,281-275	13-13,287-287[SIL];x-x,285-282[BULt]	(((((((....(.((((((((((((&)))))))))))).)----)))))))	GCCGAGGUUCUGGAGCUUGCCGGAA&UUUUGGCAAGCUGU----UCUUGGC	2	64.8361	2	0.470448	Output/R24h/cleaveLand_result/t_plot/PC-3p-13278_910_XM_016113911.2_290_TPlot.pdf	4	158.41	1	0.0324048	Output/R0h/cleaveLand_result/t_plot/PC-3p-13278_910_XM_016113911.2_290_TPlot.pdf	64.8361	158.41	-1.28879	down	3.7754e-10	7.30474e-10	yes	GO:0005634(nucleus);GO:0031323(regulation of cellular metabolic process);GO:0040029(regulation of gene expression, epigenetic);GO:0097159(organic cyclic compound binding);GO:0044428(nuclear part);GO:0071840(cellular component organization or biogenesis);GO:0016043(cellular component organization);GO:0000785(chromatin);GO:0000228(nuclear chromosome);GO:0006342(chromatin silencing);GO:0046982(prote…	NA
PC-3p-13278_910	XM_016115446.2	240	258	251	-37	-24.9	0.672973	8.5	2-7,257-252;10-19,251-242;21-21,240-240	1-1,258-258[UP5];8-9,x-x[BULq];20-20,241-241[SIL]	(.((((((((((--((((((.&.))))))..)))))))))).)	GGCAAGAGCAGC--GCCGAGG&UUUUGGCAAGCUGUUCUUGGC	1	32.4181	4	1	Output/R24h/cleaveLand_result/t_plot/PC-3p-13278_910_XM_016115446.2_251_TPlot.pdf	2	79.2048	3	0.710917	Output/R0h/cleaveLand_result/t_plot/PC-3p-13278_910_XM_016115446.2_251_TPlot.pdf	32.4181	79.2048	-1.28879	down	9.4884e-06	1.04237e-05	yes	GO:0044464(cell part);GO:0006082(organic acid metabolic process);GO:0046872(metal ion binding);GO:0016740(transferase activity);GO:0050667(homocysteine metabolic process);GO:0006807(nitrogen compound metabolic process);GO:0000097(sulfur amino acid biosynthetic process);GO:0044272(sulfur compound biosynthetic process);GO:1901607(alpha-amino acid biosynthetic process);GO:0003824(catalytic activity)…	ko01100(Metabolic pathways);ko01230(Biosynthesis of amino acids);ko00270(Cysteine and methionine metabolism);ko01110(Biosynthesis of secondary metabolites);ko00450(Selenocompound metabolism)
PC-3p-13278_910	XM_016115883.2	804	825	816	-37	-24.7	0.667568	10	4-17,822-809;20-21,805-804	1-3,825-823[UP5];18-19,808-806[AILt]	((...((((((((((((((...&...))))))))))))))-..))	GCAAUGGAGCAGUUUGCCACCA&UUUUGGCAAGCUGUUCU-UGGC	0	0	NA	NA	NA	1	39.6024	4	1	Output/R0h/cleaveLand_result/t_plot/PC-3p-13278_910_XM_016115883.2_816_TPlot.pdf	0	39.6024	-Inf	down	3.1118e-10	6.0515e-10	yes	GO:0031224(intrinsic component of membrane);GO:0044425(membrane part);GO:0016020(membrane);GO:0016021(integral component of membrane)	NA
PC-3p-13278_910	XM_016116102.2	4555	4575	4566	-37	-24.7	0.667568	13.5	5-7,4571-4569;10-20,4566-4556	1-4,4575-4572[UP5];8-9,4568-4567[SIL];21-21,4555-4555[UP3]	.(((((((((((..(((....&....)))..))))))))))).	CCCAAGAGCGGCAGGCCCAAG&UUUUGGCAAGCUGUUCUUGGC	0	0	NA	NA	NA	1	39.6024	4	1	Output/R0h/cleaveLand_result/t_plot/PC-3p-13278_910_XM_016116102.2_4566_TPlot.pdf	0	39.6024	-Inf	down	3.1118e-10	6.0515e-10	yes	GO:1901363(heterocyclic compound binding);GO:0005488(binding);GO:0003723(RNA binding);GO:0097159(organic cyclic compound binding);GO:0003676(nucleic acid binding)	ko03013(RNA transport)
PC-3p-13278_910	XM_016116271.2	1016	1043	1034	-37	-24.9	0.672973	19	1-11,1043-1033;12-12,1025-1025;14-21,1023-1016	x-x,1032-1026[BULt];13-13,1024-1024[SIL]	((((((((.(.......(((((((((((&)))))))))))-------).))))))))	GCUAAGAGGGUUUUGACGCUUGCCGAGA&UUUUGGCAAGC-------UGUUCUUGGC	1	32.4181	4	1	Output/R24h/cleaveLand_result/t_plot/PC-3p-13278_910_XM_016116271.2_1034_TPlot.pdf	0	0	NA	NA	NA	32.4181	0	Inf	up	1.2429e-08	1.41251e-08	yes	GO:1901576(organic substance biosynthetic process);GO:0043226(organelle);GO:0008483(transaminase activity);GO:0044283(small molecule biosynthetic process);GO:0005737(cytoplasm);GO:0044249(cellular biosynthetic process);GO:0032787(monocarboxylic acid metabolic process);GO:0019438(aromatic compound biosynthetic process);GO:0006807(nitrogen compound metabolic process);GO:0044464(cell part);GO:000608…	ko00790(Folate biosynthesis)
PC-3p-13278_910	XM_016116409.2	2009	2030	2021	-37	-24.4	0.659459	9	4-13,2027-2018;14-20,2016-2010	1-3,2030-2028[UP5];x-x,2017-2017[BULt];21-21,2009-2009[UP3]	.(((((((.((((((((((...&...))))))))))-))))))).	ACUGGGGAUCAGCUUGCCAUCG&UUUUGGCAAGCUG-UUCUUGGC	1	32.4181	4	1	Output/R24h/cleaveLand_result/t_plot/PC-3p-13278_910_XM_016116409.2_2021_TPlot.pdf	0	0	NA	NA	NA	32.4181	0	Inf	up	1.2429e-08	1.41251e-08	yes	GO:0043226(organelle);GO:0065007(biological regulation);GO:0022853(active ion transmembrane transporter activity);GO:0042626(ATPase activity, coupled to transmembrane movement of substances);GO:0016817(hydrolase activity, acting on acid anhydrides);GO:0006793(phosphorus metabolic process);GO:0022890(inorganic cation transmembrane transporter activity);GO:0006796(phosphate-containing compound meta…	ko00190(Oxidative phosphorylation)
PC-3p-13278_910	XM_016116955.2	462	482	473	-37	-24.3	0.656757	9	2-9,481-474;12-21,471-462	1-1,482-482[UP5];10-11,473-472[SIL]	((((((((((..((((((((.&.))))))))..))))))))))	GUCGGGGACAAGUUGCCGGAG&UUUUGGCAAGCUGUUCUUGGC	17	551.107	2	0.999981	Output/R24h/cleaveLand_result/t_plot/PC-3p-13278_910_XM_016116955.2_473_TPlot.pdf	5	198.012	2	0.999656	Output/R0h/cleaveLand_result/t_plot/PC-3p-13278_910_XM_016116955.2_473_TPlot.pdf	551.107	198.012	1.47675	up	4.3175e-38	2.075e-36	yes	GO:0009057(macromolecule catabolic process);GO:0006807(nitrogen compound metabolic process);GO:0005576(extracellular region);GO:0043227(membrane-bounded organelle);GO:0009987(cellular process);GO:0016021(integral component of membrane);GO:0070011(peptidase activity, acting on L-amino acid peptides);GO:0009056(catabolic process);GO:0005622(intracellular);GO:0004197(cysteine-type endopeptidase acti…	ko04145(Phagosome)
PC-3p-13278_910	XM_016117292.2	1785	1809	1796	-37	-25.86	0.698919	13.5	1-9,1809-1801;12-21,1794-1785	10-11,1800-1795[AILt]	((((((((((......(((((((((&)))))))))----..))))))))))	GCCAGGAACAAAUUGAUUGCCAGAA&UUUUGGCAA----GCUGUUCUUGGC	0	0	NA	NA	NA	1	39.6024	4	0.998457	Output/R0h/cleaveLand_result/t_plot/PC-3p-13278_910_XM_016117292.2_1796_TPlot.pdf	0	39.6024	-Inf	down	3.1118e-10	6.0515e-10	yes	GO:0016020(membrane);GO:0016021(integral component of membrane);GO:0031224(intrinsic component of membrane);GO:0044425(membrane part)	ko01100(Metabolic pathways);ko00600(Sphingolipid metabolism)
PC-3p-13278_910	XM_016117793.2	1559	1581	1572	-37	-24.68	0.667027	9	2-7,1580-1575;9-16,1573-1566;19-21,1561-1559	1-1,1581-1581[UP5];8-8,1574-1574[SIL];17-18,1565-1562[AILt]	(((....((((((((.((((((.&.)))))).))))))))--..)))	GCCUGCUGGGCGGCUGGCCAAAG&UUUUGGCAAGCUGUUC--UUGGC	1	32.4181	4	1	Output/R24h/cleaveLand_result/t_plot/PC-3p-13278_910_XM_016117793.2_1572_TPlot.pdf	0	0	NA	NA	NA	32.4181	0	Inf	up	1.2429e-08	1.41251e-08	yes	GO:0016491(oxidoreductase activity);GO:0055114(oxidation-reduction process);GO:0008152(metabolic process);GO:0003824(catalytic activity)	ko00410(beta-Alanine metabolism);ko00330(Arginine and proline metabolism)
PC-3p-13278_910	XM_016117984.2	537	557	548	-37	-25.5	0.689189	6	1-4,557-554;6-20,552-538	5-5,553-553[SIL];21-21,537-537[UP3]	.(((((((((((((((.((((&)))).))))))))))))))).	ACCAAGAAUGGCUUGCAGAAG&UUUUGGCAAGCUGUUCUUGGC	0	0	NA	NA	NA	1	39.6024	4	0.999931	Output/R0h/cleaveLand_result/t_plot/PC-3p-13278_910_XM_016117984.2_548_TPlot.pdf	0	39.6024	-Inf	down	3.1118e-10	6.0515e-10	yes	GO:0003824(catalytic activity);GO:0043170(macromolecule metabolic process);GO:0019538(protein metabolic process);GO:0036094(small molecule binding);GO:0097367(carbohydrate derivative binding);GO:0017076(purine nucleotide binding);GO:0032555(purine ribonucleotide binding);GO:0005488(binding);GO:0043168(anion binding);GO:0044238(primary metabolic process);GO:0032553(ribonucleotide binding);GO:00163…	NA
PC-3p-13278_910	XM_021124832.1	140	161	152	-37	-24.5	0.662162	6.5	1-10,161-152;12-14,150-148;15-21,146-140	11-11,151-151[SIL];x-x,147-147[BULt]	(((((((.(((.((((((((((&)))))))))).)))-)))))))	GCCGAGACACGAUUUGCCGAAA&UUUUGGCAAGCUGU-UCUUGGC	0	0	NA	NA	NA	1	39.6024	4	1	Output/R0h/cleaveLand_result/t_plot/PC-3p-13278_910_XM_021124832.1_152_TPlot.pdf	0	39.6024	-Inf	down	3.1118e-10	6.0515e-10	yes	GO:0036459(thiol-dependent ubiquitinyl hydrolase activity);GO:0016787(hydrolase activity);GO:0043412(macromolecule modification);GO:0043170(macromolecule metabolic process);GO:0071704(organic substance metabolic process);GO:0016579(protein deubiquitination);GO:1901565(organonitrogen compound catabolic process);GO:0044248(cellular catabolic process);GO:1901564(organonitrogen compound metabolic pro…	NA
PC-3p-13278_910	XM_021126125.1	288	309	299	-37	-25.8	0.697297	12	5-9,305-301;10-21,299-288	1-4,309-306[UP5];x-x,300-300[BULt]	((((((((((((.(((((....&....)))))-))))))))))))	GCCAGGAGCAGCUUUGUUCCUC&UUUUGGCAA-GCUGUUCUUGGC	2	64.8361	2	0.940568	Output/R24h/cleaveLand_result/t_plot/PC-3p-13278_910_XM_021126125.1_299_TPlot.pdf	0	0	NA	NA	NA	64.8361	0	Inf	up	8.1306e-16	3.55976e-15	yes	NA	NA
PC-3p-13278_910	XM_021126602.1	1182	1199	1193	-37	-26.7	0.721622	7	1-6,1199-1194;10-21,1193-1182	7-9,x-x[BULq]	((((((((((((---((((((&))))))...))))))))))))	GCCAAGAACAGC---CCAGAA&UUUUGGCAAGCUGUUCUUGGC	0	0	NA	NA	NA	1	39.6024	4	0.95613	Output/R0h/cleaveLand_result/t_plot/PC-3p-13278_910_XM_021126602.1_1193_TPlot.pdf	0	39.6024	-Inf	down	3.1118e-10	6.0515e-10	yes	GO:0016020(membrane);GO:0016798(hydrolase activity, acting on glycosyl bonds);GO:0016021(integral component of membrane);GO:0006810(transport);GO:0008152(metabolic process);GO:0005215(transporter activity);GO:0044425(membrane part);GO:0102483(scopolin beta-glucosidase activity);GO:0003824(catalytic activity);GO:0071704(organic substance metabolic process);GO:0044238(primary metabolic process);GO:…	ko01110(Biosynthesis of secondary metabolites);ko00500(Starch and sucrose metabolism);ko01100(Metabolic pathways);ko00460(Cyanoamino acid metabolism);ko00940(Phenylpropanoid biosynthesis)
PC-3p-13278_910	XM_021128891.1	362	383	374	-37	-24.3	0.656757	8	2-15,382-369;16-18,367-365;20-21,363-362	1-1,383-383[UP5];x-x,368-368[BULt];19-19,364-364[SIL]	((.(((.((((((((((((((.&.))))))))))))))-))).))	GCGGAGAAGCGGUUUGCUGAAG&UUUUGGCAAGCUGUU-CUUGGC	0	0	NA	NA	NA	1	39.6024	4	1	Output/R0h/cleaveLand_result/t_plot/PC-3p-13278_910_XM_021128891.1_374_TPlot.pdf	0	39.6024	-Inf	down	3.1118e-10	6.0515e-10	yes	GO:0010556(regulation of macromolecule biosynthetic process);GO:0090304(nucleic acid metabolic process);GO:0018130(heterocycle biosynthetic process);GO:1901360(organic cyclic compound metabolic process);GO:1903506(regulation of nucleic acid-templated transcription);GO:0005488(binding);GO:0046483(heterocycle metabolic process);GO:0006351(transcription, DNA-templated);GO:0032774(RNA biosynthetic pr…	NA
PC-3p-13278_910	XM_021129701.1	1327	1347	1338	-37	-26.7	0.721622	6.5	3-4,1345-1344;6-20,1342-1328	1-2,1347-1346[UP5];5-5,1343-1343[SIL];21-21,1327-1327[UP3]	.(((((((((((((((.((..&..)).))))))))))))))).	AUCAAGAACAGCUUGCGAACA&UUUUGGCAAGCUGUUCUUGGC	1	32.4181	4	0.982456	Output/R24h/cleaveLand_result/t_plot/PC-3p-13278_910_XM_021129701.1_1338_TPlot.pdf	0	0	NA	NA	NA	32.4181	0	Inf	up	1.2429e-08	1.41251e-08	yes	GO:0005488(binding);GO:0003676(nucleic acid binding);GO:0003723(RNA binding);GO:0097159(organic cyclic compound binding);GO:1901363(heterocyclic compound binding)	ko03018(RNA degradation)
PC-3p-13278_910	XM_021130255.1	2718	2739	2730	-37	-24.62	0.665405	7	2-14,2738-2726;18-20,2721-2719	1-1,2739-2739[UP5];15-17,2725-2722[AILt];21-21,2718-2718[UP3]	.(((....(((((((((((((.&.)))))))))))))-...))).	UCCAUCAUACAGCUUGCCAGAU&UUUUGGCAAGCUGU-UCUUGGC	1	32.4181	4	1	Output/R24h/cleaveLand_result/t_plot/PC-3p-13278_910_XM_021130255.1_2730_TPlot.pdf	0	0	NA	NA	NA	32.4181	0	Inf	up	1.2429e-08	1.41251e-08	yes	GO:0043167(ion binding);GO:0044238(primary metabolic process);GO:0019318(hexose metabolic process);GO:0043170(macromolecule metabolic process);GO:0008270(zinc ion binding);GO:0036211(protein modification process);GO:0044237(cellular metabolic process);GO:0006013(mannose metabolic process);GO:1901135(carbohydrate derivative metabolic process);GO:0016787(hydrolase activity);GO:0005996(monosaccharid…	ko00511(Other glycan degradation)
PC-3p-13278_910	XM_021131107.1	3605	3625	3616	-37	-24.9	0.672973	5	1-19,3625-3607	20-21,3606-3605[UP3]	..(((((((((((((((((((&)))))))))))))))))))..	AGCAAGGAUAGUUUGUCAAAA&UUUUGGCAAGCUGUUCUUGGC	1	32.4181	4	1	Output/R24h/cleaveLand_result/t_plot/PC-3p-13278_910_XM_021131107.1_3616_TPlot.pdf	0	0	NA	NA	NA	32.4181	0	Inf	up	1.2429e-08	1.41251e-08	yes	NA	NA
PC-3p-13278_910	XM_021133290.1	276	296	287	-37	-24.38	0.658919	12	4-7,293-290;11-21,286-276	1-3,296-294[UP5];8-10,289-287[SIL]	(((((((((((...((((...&...))))...)))))))))))	GCCAAGAACAGAUGGUCACAA&UUUUGGCAAGCUGUUCUUGGC	0	0	NA	NA	NA	1	39.6024	4	1	Output/R0h/cleaveLand_result/t_plot/PC-3p-13278_910_XM_021133290.1_287_TPlot.pdf	0	39.6024	-Inf	down	3.1118e-10	6.0515e-10	yes	NA	NA
PC-3p-13278_910	XM_021134255.1	1475	1494	1485	-37	-24.2	0.654054	5.5	1-8,1494-1487;10-12,1485-1483;14-21,1482-1475	9-9,1486-1486[SIL];13-13,x-x[BULq]	((((((((-(((.((((((((&)))))))).))).))))))))	GCCAGGAA-AGCAUGUCAGAA&UUUUGGCAAGCUGUUCUUGGC	1	32.4181	4	1	Output/R24h/cleaveLand_result/t_plot/PC-3p-13278_910_XM_021134255.1_1485_TPlot.pdf	0	0	NA	NA	NA	32.4181	0	Inf	up	1.2429e-08	1.41251e-08	yes	NA	ko03015(mRNA surveillance pathway)
PC-3p-13278_910	XM_021135755.1	64	87	75	-37	-24.82	0.670811	18.5	5-7,83-81;10-21,75-64	1-4,87-84[UP5];8-9,80-76[AILt]	((((((((((((.....(((....&....)))---..))))))))))))	GCCAAGGACAGCGUAAGGCUCGUC&UUUUGGC---AAGCUGUUCUUGGC	1	32.4181	4	1	Output/R24h/cleaveLand_result/t_plot/PC-3p-13278_910_XM_021135755.1_75_TPlot.pdf	1	39.6024	4	1	Output/R0h/cleaveLand_result/t_plot/PC-3p-13278_910_XM_021135755.1_75_TPlot.pdf	32.4181	39.6024	-0.28879	down	0.39723	0.398704	yes	GO:1904680(peptide transmembrane transporter activity);GO:0070727(cellular macromolecule localization);GO:0005623(cell);GO:0071702(organic substance transport);GO:0022884(macromolecule transmembrane transporter activity);GO:0034613(cellular protein localization);GO:0071705(nitrogen compound transport);GO:0005215(transporter activity);GO:0015399(primary active transmembrane transporter activity);G…	ko04145(Phagosome);ko03060(Protein export);ko04141(Protein processing in endoplasmic reticulum)
PC-3p-13278_910	XM_021139292.1	857	877	868	-37	-24.6	0.664865	5.5	2-16,876-862;19-21,859-857	1-1,877-877[UP5];17-18,861-860[SIL]	(((..(((((((((((((((.&.)))))))))))))))..)))	GUUUUGAAUGGCUUGCCAAAU&UUUUGGCAAGCUGUUCUUGGC	0	0	NA	NA	NA	1	39.6024	4	1	Output/R0h/cleaveLand_result/t_plot/PC-3p-13278_910_XM_021139292.1_868_TPlot.pdf	0	39.6024	-Inf	down	3.1118e-10	6.0515e-10	yes	GO:0016740(transferase activity);GO:0003824(catalytic activity);GO:0016757(transferase activity, transferring glycosyl groups);GO:0031224(intrinsic component of membrane);GO:0044425(membrane part);GO:0016021(integral component of membrane);GO:0016020(membrane)	ko00515(Mannose type O-glycan biosynthesis);ko01100(Metabolic pathways)
PC-3p-13278_910	XM_021140399.1	322	344	335	-37	-25.6	0.691892	11	5-12,340-333;14-17,331-328;18-21,325-322	1-4,344-341[UP5];13-13,332-332[SIL];x-x,327-326[BULt]	((((..((((.((((((((....&....)))))))).))))--))))	GCCGACAGAGGAGCUUGCCUCCG&UUUUGGCAAGCUGUUCU--UGGC	0	0	NA	NA	NA	1	39.6024	4	0.999824	Output/R0h/cleaveLand_result/t_plot/PC-3p-13278_910_XM_021140399.1_335_TPlot.pdf	0	39.6024	-Inf	down	3.1118e-10	6.0515e-10	yes	GO:0050789(regulation of biological process);GO:0030234(enzyme regulator activity);GO:0006810(transport);GO:0060341(regulation of cellular localization);GO:0060589(nucleoside-triphosphatase regulator activity);GO:0044425(membrane part);GO:0048209(regulation of vesicle targeting, to, from or within Golgi);GO:0009306(protein secretion);GO:0016491(oxidoreductase activity);GO:0016628(oxidoreductase a…	ko04141(Protein processing in endoplasmic reticulum)
PC-3p-13278_910	XM_021140420.1	540	565	552	-37	-24.4	0.659459	17.5	5-7,561-559;8-10,554-552;11-21,550-540	1-4,565-562[UP5];x-x,558-555[BULt];x-x,551-551[BULt]	(((((((((((.(((....(((....&....)))----)))-)))))))))))	GCCAAGGACAGACUUGAGAGCCUCAU&UUUUGGC----AAG-CUGUUCUUGGC	3	97.2542	3	0.926991	Output/R24h/cleaveLand_result/t_plot/PC-3p-13278_910_XM_021140420.1_552_TPlot.pdf	1	39.6024	4	1	Output/R0h/cleaveLand_result/t_plot/PC-3p-13278_910_XM_021140420.1_552_TPlot.pdf	97.2542	39.6024	1.29617	up	8.2959e-07	9.29693e-07	yes	NA	NA
PC-3p-13278_910	XM_021140784.1	2055	2075	2066	-37	-25.7	0.694595	7.5	2-5,2074-2071;7-20,2069-2056	1-1,2075-2075[UP5];6-6,2070-2070[SIL];21-21,2055-2055[UP3]	.((((((((((((((.((((.&.)))).)))))))))))))).	UCCAAGGACAGUUUGGCAGGU&UUUUGGCAAGCUGUUCUUGGC	1	32.4181	4	0.999974	Output/R24h/cleaveLand_result/t_plot/PC-3p-13278_910_XM_021140784.1_2066_TPlot.pdf	0	0	NA	NA	NA	32.4181	0	Inf	up	1.2429e-08	1.41251e-08	yes	NA	NA
PC-3p-13278_910	XM_021140785.1	2085	2105	2096	-37	-25.7	0.694595	7.5	2-5,2104-2101;7-20,2099-2086	1-1,2105-2105[UP5];6-6,2100-2100[SIL];21-21,2085-2085[UP3]	.((((((((((((((.((((.&.)))).)))))))))))))).	UCCAAGGACAGUUUGGCAGGU&UUUUGGCAAGCUGUUCUUGGC	2	64.8361	2	0.950063	Output/R24h/cleaveLand_result/t_plot/PC-3p-13278_910_XM_021140785.1_2096_TPlot.pdf	0	0	NA	NA	NA	64.8361	0	Inf	up	8.1306e-16	3.55976e-15	yes	NA	NA
PC-3p-13278_910	XM_021140791.1	1068	1088	1078	-37	-24.5	0.662162	6.5	1-9,1088-1080;10-11,1078-1077;13-20,1076-1069	x-x,1079-1079[BULt];12-12,x-x[BULq];21-21,1068-1068[UP3]	.((((((((-((.(((((((((&)))))))))-)).)))))))).	UCCAAGAAC-GCAUUGCCAAGG&UUUUGGCAA-GCUGUUCUUGGC	0	0	NA	NA	NA	1	39.6024	4	1	Output/R0h/cleaveLand_result/t_plot/PC-3p-13278_910_XM_021140791.1_1078_TPlot.pdf	0	39.6024	-Inf	down	3.1118e-10	6.0515e-10	yes	GO:0044424(intracellular part);GO:0043169(cation binding);GO:0005622(intracellular);GO:0044464(cell part);GO:0005488(binding);GO:0005737(cytoplasm);GO:0046872(metal ion binding);GO:0005623(cell);GO:0043167(ion binding)	NA
PC-3p-13278_910	XM_021141961.1	679	701	692	-37	-29.7	0.802703	4.5	1-10,701-692;11-17,690-684;19-21,681-679	x-x,691-691[BULt];18-18,683-682[AILt]	(((..(((((((.((((((((((&))))))))))-)))))))-.)))	GCCUUGGAACAGUCUUGCCAAAA&UUUUGGCAAG-CUGUUCU-UGGC	1	32.4181	4	0.338663	Output/R24h/cleaveLand_result/t_plot/PC-3p-13278_910_XM_021141961.1_692_TPlot.pdf	0	0	NA	NA	NA	32.4181	0	Inf	up	1.2429e-08	1.41251e-08	yes	GO:0009451(RNA modification);GO:0009987(cellular process);GO:0034470(ncRNA processing);GO:0016070(RNA metabolic process);GO:0008033(tRNA processing);GO:0034641(cellular nitrogen compound metabolic process);GO:0006139(nucleobase-containing compound metabolic process);GO:0090304(nucleic acid metabolic process);GO:0003824(catalytic activity);GO:1901363(heterocyclic compound binding);GO:0003676(nucle…	NA
PC-3p-13278_910	XM_021142106.1	632	652	643	-37	-24.8	0.67027	4	1-13,652-640;15-16,638-637;18-20,635-633	14-14,639-639[SIL];17-17,636-636[SIL];21-21,632-632[UP3]	.(((.((.(((((((((((((&))))))))))))).)).))).	ACCAUGAUCAGCUUGUCAAAA&UUUUGGCAAGCUGUUCUUGGC	4	129.672	1	0.349269	Output/R24h/cleaveLand_result/t_plot/PC-3p-13278_910_XM_021142106.1_643_TPlot.pdf	0	0	NA	NA	NA	129.672	0	Inf	up	4.813e-30	1.15989e-28	yes	GO:0005524(ATP binding);GO:1901363(heterocyclic compound binding);GO:1901564(organonitrogen compound metabolic process);GO:0043170(macromolecule metabolic process);GO:0008152(metabolic process);GO:0003824(catalytic activity);GO:0044237(cellular metabolic process);GO:0032555(purine ribonucleotide binding);GO:0043167(ion binding);GO:0036211(protein modification process);GO:0006468(protein phosphory…	ko03008(Ribosome biogenesis in eukaryotes);ko04712(Circadian rhythm - plant)
PC-3p-13278_910	XM_021142393.1	2762	2782	2773	-37	-26.6	0.718919	4	1-8,2782-2775;10-13,2773-2770;15-16,2768-2767;18-21,2765-2762	9-9,2774-2774[SIL];14-14,2769-2769[SIL];17-17,2766-2766[SIL]	((((.((.((((.((((((((&)))))))).)))).)).))))	GCCAUGAUCAGCGUGCCAAAA&UUUUGGCAAGCUGUUCUUGGC	0	0	NA	NA	NA	1	39.6024	4	0.975646	Output/R0h/cleaveLand_result/t_plot/PC-3p-13278_910_XM_021142393.1_2773_TPlot.pdf	0	39.6024	-Inf	down	3.1118e-10	6.0515e-10	yes	NA	ko04933(AGE-RAGE signaling pathway in diabetic complications)
PC-3p-13278_910	XM_021142618.1	792	811	802	-37	-24.9	0.672973	10.5	5-13,807-799;16-21,797-792	1-4,811-808[UP5];14-15,798-798[AILq]	((((((.-(((((((((....&....)))))))))..))))))	GCCAGGU-CAGCUUGCUUAAC&UUUUGGCAAGCUGUUCUUGGC	0	0	NA	NA	NA	1	39.6024	4	1	Output/R0h/cleaveLand_result/t_plot/PC-3p-13278_910_XM_021142618.1_802_TPlot.pdf	0	39.6024	-Inf	down	3.1118e-10	6.0515e-10	yes	GO:0043226(organelle);GO:0006468(protein phosphorylation);GO:0043229(intracellular organelle);GO:0044267(cellular protein metabolic process);GO:0005737(cytoplasm);GO:0071704(organic substance metabolic process);GO:0044424(intracellular part);GO:0004672(protein kinase activity);GO:0016301(kinase activity);GO:0044237(cellular metabolic process);GO:0019538(protein metabolic process);GO:0006796(phosp…	NA
PC-3p-13278_910	XM_021142947.1	188	214	199	-37	-29.7	0.802703	16.5	2-7,213-208;8-21,201-188	1-1,214-214[UP5];x-x,207-202[BULt]	((((((((((((((......((((((.&.))))))------))))))))))))))	GCCAAGAGCGGCUUCACGCGGCCGGAG&UUUUGGC------AAGCUGUUCUUGGC	1	32.4181	4	0.323295	Output/R24h/cleaveLand_result/t_plot/PC-3p-13278_910_XM_021142947.1_199_TPlot.pdf	0	0	NA	NA	NA	32.4181	0	Inf	up	1.2429e-08	1.41251e-08	yes	GO:0044425(membrane part);GO:0016020(membrane);GO:0016021(integral component of membrane);GO:0031224(intrinsic component of membrane)	NA
PC-3p-13278_910	XM_021143426.1	1096	1120	1109	-37	-25.7	0.694595	8.5	1-8,1120-1113;9-15,1110-1104;16-19,1102-1099;20-21,1097-1096	x-x,1112-1111[BULt];x-x,1103-1103[BULt];x-x,1098-1098[BULt]	((.((((.(((((((..((((((((&))))))))--)))))))-))))-))	GCUCAAGAAGCAGCUCAUGCCAGGA&UUUUGGCA--AGCUGUU-CUUG-GC	0	0	NA	NA	NA	1	39.6024	4	0.999533	Output/R0h/cleaveLand_result/t_plot/PC-3p-13278_910_XM_021143426.1_1109_TPlot.pdf	0	39.6024	-Inf	down	3.1118e-10	6.0515e-10	yes	NA	NA
PC-3p-134942_50	XM_016084087.2	748	762	753	-36.3	-24.2	0.666667	3	11-24,761-748	10-10,762-762[SIL]	((((((((((((((.&.))))))))))))))	AGUGUCUCAGUGAUG&ACGAUUAAAAAUCAC	0	0	NA	NA	NA	1	39.6024	4	0.268496	Output/R0h/cleaveLand_result/t_plot/PC-3p-134942_50_XM_016084087.2_753_TPlot.pdf	0	39.6024	-Inf	down	3.1118e-10	6.0515e-10	yes	GO:0016787(hydrolase activity);GO:0003824(catalytic activity)	NA
PC-3p-1355_7915	BGI_novel_T001210	1085	1105	1096	-29.6	-22.3	0.753378	7	2-5,1104-1101;7-12,1099-1094;14-21,1092-1085	1-1,1105-1105[UP5];6-6,1100-1100[SIL];13-13,1093-1093[SIL]	((((((((.((((((.((((.&.)))).)))))).))))))))	UGCUUAGUGGAACUCCUGCCU&UGGUAAGAGUUUGAUUAAGUA	1	32.4181	4	0.531429	Output/R24h/cleaveLand_result/t_plot/PC-3p-1355_7915_BGI_novel_T001210_1096_TPlot.pdf	0	0	NA	NA	NA	32.4181	0	Inf	up	1.2429e-08	1.41251e-08	yes	NA	NA
PC-3p-1355_7915	BGI_novel_T003971	7069	7090	7081	-29.6	-19.5	0.658784	6.5	2-9,7089-7082;11-13,7080-7078;14-21,7076-7069	1-1,7090-7090[UP5];10-10,7081-7081[SIL];x-x,7077-7077[BULt]	((((((((.(((.((((((((.&.)))))))).)))-))))))))	UGCUUAAUGCAACUUCUUGCCU&UGGUAAGAGUUUG-AUUAAGUA	1	32.4181	4	0.99999	Output/R24h/cleaveLand_result/t_plot/PC-3p-1355_7915_BGI_novel_T003971_7081_TPlot.pdf	0	0	NA	NA	NA	32.4181	0	Inf	up	1.2429e-08	1.41251e-08	yes	NA	NA
PC-3p-1355_7915	BGI_novel_T006619	2457	2476	2468	-29.6	-19.9	0.672297	6.5	2-5,2475-2472;7-20,2471-2458	1-1,2476-2476[UP5];6-6,x-x[BULq];21-21,2457-2457[UP3]	.((((((((((((((-((((.&.)))).)))))))))))))).	AACUUAAUUAAACUC-UGCUG&UGGUAAGAGUUUGAUUAAGUA	0	0	NA	NA	NA	1	39.6024	4	0.999143	Output/R0h/cleaveLand_result/t_plot/PC-3p-1355_7915_BGI_novel_T006619_2468_TPlot.pdf	0	39.6024	-Inf	down	3.1118e-10	6.0515e-10	yes	GO:0016491(oxidoreductase activity);GO:0006807(nitrogen compound metabolic process);GO:0046914(transition metal ion binding);GO:0005488(binding);GO:0008152(metabolic process);GO:0003824(catalytic activity);GO:0046872(metal ion binding);GO:0008131(primary amine oxidase activity);GO:0043167(ion binding);GO:0005507(copper ion binding);GO:0048037(cofactor binding);GO:0071704(organic substance metabol…	ko01100(Metabolic pathways);ko00360(Phenylalanine metabolism);ko00410(beta-Alanine metabolism);ko00950(Isoquinoline alkaloid biosynthesis);ko00960(Tropane, piperidine and pyridine alkaloid biosynthesis);ko01110(Biosynthesis of secondary metabolites);ko00350(Tyrosine metabolism);ko00260(Glycine, serine and threonine metabolism)
PC-3p-1355_7915	BGI_novel_T008145	654	679	670	-29.6	-20.4	0.689189	11	3-16,677-664;17-21,658-654	1-2,679-678[UP5];x-x,663-659[BULt]	(((((.....((((((((((((((..&..))))))))))))))-----)))))	UACUUCUAAGGGUCAAGCUCUUGCAG&UGGUAAGAGUUUGAUU-----AAGUA	0	0	NA	NA	NA	1	39.6024	4	0.988956	Output/R0h/cleaveLand_result/t_plot/PC-3p-1355_7915_BGI_novel_T008145_670_TPlot.pdf	0	39.6024	-Inf	down	3.1118e-10	6.0515e-10	yes	GO:0005622(intracellular);GO:1901265(nucleoside phosphate binding);GO:0032561(guanyl ribonucleotide binding);GO:0050896(response to stimulus);GO:0007165(signal transduction);GO:0043167(ion binding);GO:0005623(cell);GO:0097367(carbohydrate derivative binding);GO:0097159(organic cyclic compound binding);GO:0016462(pyrophosphatase activity);GO:0032550(purine ribonucleoside binding);GO:0036094(small …	ko04144(Endocytosis)
PC-3p-1355_7915	BGI_novel_T008207	248	267	258	-29.6	-19.3	0.652027	8.5	3-14,265-254;18-21,251-248	1-2,267-266[UP5];15-17,253-252[AILq]	((((..-((((((((((((..&..))))))))))))...))))	UGCUGC-UCAGGCUCUUACAA&UGGUAAGAGUUUGAUUAAGUA	2	64.8361	2	0.99348	Output/R24h/cleaveLand_result/t_plot/PC-3p-1355_7915_BGI_novel_T008207_258_TPlot.pdf	0	0	NA	NA	NA	64.8361	0	Inf	up	8.1306e-16	3.55976e-15	yes	NA	NA
PC-3p-1355_7915	BGI_novel_T010359	1775	1796	1787	-29.6	-19.7	0.665541	6.5	1-11,1796-1786;13-18,1784-1779;19-20,1777-1776	12-12,1785-1785[SIL];x-x,1778-1778[BULt];21-21,1775-1775[UP3]	.((.((((((.(((((((((((&))))))))))).))))))-)).	CACGUUGAUCCAGCUCUUACUA&UGGUAAGAGUUUGAUUAA-GUA	1	32.4181	4	0.999963	Output/R24h/cleaveLand_result/t_plot/PC-3p-1355_7915_BGI_novel_T010359_1787_TPlot.pdf	0	0	NA	NA	NA	32.4181	0	Inf	up	1.2429e-08	1.41251e-08	yes	NA	NA
PC-3p-1355_7915	BGI_novel_T011771	394	413	404	-29.6	-19.3	0.652027	8.5	3-14,411-400;18-21,397-394	1-2,413-412[UP5];15-17,399-398[AILq]	((((..-((((((((((((..&..))))))))))))...))))	UGCUGC-UCAGGCUCUUACAA&UGGUAAGAGUUUGAUUAAGUA	0	0	NA	NA	NA	1	39.6024	4	0.999993	Output/R0h/cleaveLand_result/t_plot/PC-3p-1355_7915_BGI_novel_T011771_404_TPlot.pdf	0	39.6024	-Inf	down	3.1118e-10	6.0515e-10	yes	NA	NA
PC-3p-1355_7915	XM_016076320.2	1468	1485	1476	-29.6	-20.5	0.692568	8	2-14,1484-1472;18-20,1471-1469	1-1,1485-1485[UP5];15-17,x-x[BULq];21-21,1468-1468[UP3]	.(((---(((((((((((((.&.)))))))))))))...))).	AACU---UCGAGCUCUUGCCG&UGGUAAGAGUUUGAUUAAGUA	1	32.4181	4	0.991779	Output/R24h/cleaveLand_result/t_plot/PC-3p-1355_7915_XM_016076320.2_1476_TPlot.pdf	0	0	NA	NA	NA	32.4181	0	Inf	up	1.2429e-08	1.41251e-08	yes	GO:0043167(ion binding);GO:1901360(organic cyclic compound metabolic process);GO:0003824(catalytic activity);GO:0004497(monooxygenase activity);GO:0005488(binding);GO:0016709(oxidoreductase activity, acting on paired donors, with incorporation or reduction of molecular oxygen, NAD(P)H as one donor, and incorporation of one atom of oxygen);GO:0097159(organic cyclic compound binding);GO:1901363(het…	ko01100(Metabolic pathways);ko00360(Phenylalanine metabolism);ko00945(Stilbenoid, diarylheptanoid and gingerol biosynthesis);ko00941(Flavonoid biosynthesis);ko00130(Ubiquinone and other terpenoid-quinone biosynthesis);ko00940(Phenylpropanoid biosynthesis);ko01110(Biosynthesis of secondary metabolites)
PC-3p-1355_7915	XM_016077858.2	396	415	407	-29.6	-20.4	0.689189	9	2-5,414-411;7-16,410-401;18-20,399-397	1-1,415-415[UP5];6-6,x-x[BULq];17-17,400-400[SIL];21-21,396-396[UP3]	.(((.((((((((((-((((.&.)))).)))))))))).))).	AGCUGGAUCAGGCUC-UGCCU&UGGUAAGAGUUUGAUUAAGUA	2	64.8361	2	0.832384	Output/R24h/cleaveLand_result/t_plot/PC-3p-1355_7915_XM_016077858.2_407_TPlot.pdf	0	0	NA	NA	NA	64.8361	0	Inf	up	8.1306e-16	3.55976e-15	yes	NA	NA
PC-3p-1355_7915	XM_016079097.2	1165	1185	1176	-29.6	-20.1	0.679054	10	1-13,1185-1173	14-21,1172-1165[UP3]	........(((((((((((((&)))))))))))))........	GCCGCCUCCAGACUCUUGCCA&UGGUAAGAGUUUGAUUAAGUA	1	32.4181	4	0.999453	Output/R24h/cleaveLand_result/t_plot/PC-3p-1355_7915_XM_016079097.2_1176_TPlot.pdf	0	0	NA	NA	NA	32.4181	0	Inf	up	1.2429e-08	1.41251e-08	yes	GO:0005524(ATP binding);GO:0006807(nitrogen compound metabolic process);GO:0032553(ribonucleotide binding);GO:0006796(phosphate-containing compound metabolic process);GO:0019538(protein metabolic process);GO:0043170(macromolecule metabolic process);GO:0005488(binding);GO:0004674(protein serine/threonine kinase activity);GO:0030554(adenyl nucleotide binding);GO:0016740(transferase activity);GO:003…	NA
PC-3p-1355_7915	XM_016079688.2	679	699	690	-29.6	-20.3	0.685811	9	2-14,698-686	1-1,699-699[UP5];15-21,685-679[UP3]	.......(((((((((((((.&.))))))))))))).......	UCAUUCCUCAGACUCUUACCU&UGGUAAGAGUUUGAUUAAGUA	1	32.4181	4	0.998721	Output/R24h/cleaveLand_result/t_plot/PC-3p-1355_7915_XM_016079688.2_690_TPlot.pdf	0	0	NA	NA	NA	32.4181	0	Inf	up	1.2429e-08	1.41251e-08	yes	GO:0043234(protein complex);GO:0005783(endoplasmic reticulum);GO:0006457(protein folding);GO:0044422(organelle part);GO:0005622(intracellular);GO:0043229(intracellular organelle);GO:0044432(endoplasmic reticulum part);GO:0030176(integral component of endoplasmic reticulum membrane);GO:0016021(integral component of membrane);GO:0032991(macromolecular complex);GO:0005623(cell);GO:0031224(intrinsic …	NA
PC-3p-1355_7915	XM_016084270.2	238	257	249	-29.6	-19.5	0.658784	8	2-5,256-253;7-19,252-240	1-1,257-257[UP5];6-6,x-x[BULq];20-21,239-238[UP3]	..(((((((((((((-((((.&.)))).)))))))))))))..	CUCUUGGUCAAGCUU-UACCG&UGGUAAGAGUUUGAUUAAGUA	1	32.4181	4	0.999991	Output/R24h/cleaveLand_result/t_plot/PC-3p-1355_7915_XM_016084270.2_249_TPlot.pdf	2	79.2048	3	0.508738	Output/R0h/cleaveLand_result/t_plot/PC-3p-1355_7915_XM_016084270.2_249_TPlot.pdf	32.4181	79.2048	-1.28879	down	9.4884e-06	1.04237e-05	yes	GO:0003735(structural constituent of ribosome);GO:0043228(non-membrane-bounded organelle);GO:0071704(organic substance metabolic process);GO:0006518(peptide metabolic process);GO:0043232(intracellular non-membrane-bounded organelle);GO:0043043(peptide biosynthetic process);GO:0022625(cytosolic large ribosomal subunit);GO:0022626(cytosolic ribosome);GO:0044237(cellular metabolic process);GO:000519…	ko03010(Ribosome)
PC-3p-1355_7915	XM_016085157.2	1149	1170	1160	-29.6	-23.9	0.807432	5	1-2,1170-1169;3-14,1167-1156;16-21,1154-1149	x-x,1168-1168[BULt];15-15,1155-1155[SIL]	((((((.((((((((((((.((&))-)))))))))))).))))))	UACUUAUUCAAGCUCUUGCACA&UG-GUAAGAGUUUGAUUAAGUA	1	32.4181	4	0.0665943	Output/R24h/cleaveLand_result/t_plot/PC-3p-1355_7915_XM_016085157.2_1160_TPlot.pdf	1	39.6024	4	0.0536794	Output/R0h/cleaveLand_result/t_plot/PC-3p-1355_7915_XM_016085157.2_1160_TPlot.pdf	32.4181	39.6024	-0.28879	down	0.39723	0.398704	yes	GO:0050789(regulation of biological process);GO:0051171(regulation of nitrogen compound metabolic process);GO:0003700(DNA binding transcription factor activity);GO:0010468(regulation of gene expression);GO:0043229(intracellular organelle);GO:0005623(cell);GO:0050794(regulation of cellular process);GO:0043565(sequence-specific DNA binding);GO:0044464(cell part);GO:0065007(biological regulation);GO…	ko04075(Plant hormone signal transduction)
PC-3p-1355_7915	XM_016086710.2	2932	2952	2943	-29.6	-19.7	0.665541	8.5	3-18,2950-2935	1-2,2952-2951[UP5];19-21,2934-2932[UP3]	...((((((((((((((((..&..))))))))))))))))...	CCAUUAGUCAAGCUCUUAUAU&UGGUAAGAGUUUGAUUAAGUA	0	0	NA	NA	NA	1	39.6024	4	0.999671	Output/R0h/cleaveLand_result/t_plot/PC-3p-1355_7915_XM_016086710.2_2943_TPlot.pdf	0	39.6024	-Inf	down	3.1118e-10	6.0515e-10	yes	GO:0016887(ATPase activity);GO:0009058(biosynthetic process);GO:1901566(organonitrogen compound biosynthetic process);GO:1901293(nucleoside phosphate biosynthetic process);GO:0032553(ribonucleotide binding);GO:0009127(purine nucleoside monophosphate biosynthetic process);GO:0055086(nucleobase-containing small molecule metabolic process);GO:0055085(transmembrane transport);GO:0003824(catalytic act…	ko00190(Oxidative phosphorylation)
PC-3p-1355_7915	XM_016086725.2	2849	2869	2860	-29.6	-19.7	0.665541	8.5	3-18,2867-2852	1-2,2869-2868[UP5];19-21,2851-2849[UP3]	...((((((((((((((((..&..))))))))))))))))...	CCAUUAGUCAAGCUCUUAUAU&UGGUAAGAGUUUGAUUAAGUA	0	0	NA	NA	NA	3	118.807	2	0.917394	Output/R0h/cleaveLand_result/t_plot/PC-3p-1355_7915_XM_016086725.2_2860_TPlot.pdf	0	118.807	-Inf	down	1.1501e-27	2.02633e-26	yes	GO:0016887(ATPase activity);GO:0009058(biosynthetic process);GO:1901566(organonitrogen compound biosynthetic process);GO:1901293(nucleoside phosphate biosynthetic process);GO:0032553(ribonucleotide binding);GO:0009127(purine nucleoside monophosphate biosynthetic process);GO:0055086(nucleobase-containing small molecule metabolic process);GO:0055085(transmembrane transport);GO:0003824(catalytic act…	ko00190(Oxidative phosphorylation)
PC-3p-1355_7915	XM_016088525.2	973	993	984	-29.6	-19.4	0.655405	8.5	3-11,991-983;13-20,981-974	1-2,993-992[UP5];12-12,982-982[SIL];21-21,973-973[UP3]	.((((((((.(((((((((..&..))))))))).)))))))).	AACUUGAUCUAAUUCUUGCAA&UGGUAAGAGUUUGAUUAAGUA	1	32.4181	4	0.999997	Output/R24h/cleaveLand_result/t_plot/PC-3p-1355_7915_XM_016088525.2_984_TPlot.pdf	1	39.6024	4	0.999964	Output/R0h/cleaveLand_result/t_plot/PC-3p-1355_7915_XM_016088525.2_984_TPlot.pdf	32.4181	39.6024	-0.28879	down	0.39723	0.398704	yes	NA	ko00500(Starch and sucrose metabolism);ko01100(Metabolic pathways)
PC-3p-1355_7915	XM_016095773.2	723	743	734	-29.6	-19.9	0.672297	10	2-16,742-728	1-1,743-743[UP5];17-21,727-723[UP3]	.....(((((((((((((((.&.))))))))))))))).....	GUAAAGGUCAAGCUCUUGCUU&UGGUAAGAGUUUGAUUAAGUA	2	64.8361	2	0.936379	Output/R24h/cleaveLand_result/t_plot/PC-3p-1355_7915_XM_016095773.2_734_TPlot.pdf	0	0	NA	NA	NA	64.8361	0	Inf	up	8.1306e-16	3.55976e-15	yes	GO:0006796(phosphate-containing compound metabolic process);GO:0043167(ion binding);GO:0009311(oligosaccharide metabolic process);GO:0046351(disaccharide biosynthetic process);GO:0009987(cellular process);GO:0016311(dephosphorylation);GO:0005985(sucrose metabolic process);GO:0008152(metabolic process);GO:0043169(cation binding);GO:0003824(catalytic activity);GO:0044238(primary metabolic process);…	ko00500(Starch and sucrose metabolism)
PC-3p-1355_7915	XM_016098404.2	706	727	718	-29.6	-22.2	0.75	4.5	1-13,727-715;14-15,713-712;18-21,709-706	x-x,714-714[BULt];16-17,711-710[SIL]	((((..((.(((((((((((((&)))))))))))))-))..))))	UACUCUGUCCAGACUCUUACCA&UGGUAAGAGUUUG-AUUAAGUA	1	32.4181	4	0.644322	Output/R24h/cleaveLand_result/t_plot/PC-3p-1355_7915_XM_016098404.2_718_TPlot.pdf	0	0	NA	NA	NA	32.4181	0	Inf	up	1.2429e-08	1.41251e-08	yes	NA	ko04075(Plant hormone signal transduction)
PC-3p-1355_7915	XM_016100506.2	1704	1725	1716	-29.6	-20.8	0.702703	7	2-12,1724-1714;14-21,1711-1704	1-1,1725-1725[UP5];13-13,1713-1712[AILt]	((((((((..(((((((((((.&.)))))))))))-.))))))))	UGCUUGAUAUGAACUCUUACUU&UGGUAAGAGUUU-GAUUAAGUA	1	32.4181	4	0.969551	Output/R24h/cleaveLand_result/t_plot/PC-3p-1355_7915_XM_016100506.2_1716_TPlot.pdf	0	0	NA	NA	NA	32.4181	0	Inf	up	1.2429e-08	1.41251e-08	yes	GO:0016020(membrane);GO:0016021(integral component of membrane);GO:0016740(transferase activity);GO:0032259(methylation);GO:0008168(methyltransferase activity);GO:0044425(membrane part);GO:0008152(metabolic process);GO:0016741(transferase activity, transferring one-carbon groups);GO:0031224(intrinsic component of membrane);GO:0003824(catalytic activity)	NA
PC-3p-1355_7915	XM_016101908.2	556	579	570	-29.6	-19.9	0.672297	11.5	1-10,579-570;11-15,565-561;17-20,560-557	x-x,569-566[BULt];16-16,x-x[BULq];21-21,556-556[UP3]	.((((-(((((....((((((((((&))))))))))----))))).)))).	AACUU-GUCAAUGAUACUCUUGCCA&UGGUAAGAGU----UUGAUUAAGUA	1	32.4181	4	0.999796	Output/R24h/cleaveLand_result/t_plot/PC-3p-1355_7915_XM_016101908.2_570_TPlot.pdf	0	0	NA	NA	NA	32.4181	0	Inf	up	1.2429e-08	1.41251e-08	yes	GO:0000287(magnesium ion binding);GO:0006629(lipid metabolic process);GO:0005622(intracellular);GO:0042578(phosphoric ester hydrolase activity);GO:0046834(lipid phosphorylation);GO:0046486(glycerolipid metabolic process);GO:0044464(cell part);GO:0044255(cellular lipid metabolic process);GO:0046854(phosphatidylinositol phosphorylation);GO:0005623(cell);GO:0016787(hydrolase activity);GO:0016788(hyd…	ko00920(Sulfur metabolism);ko00562(Inositol phosphate metabolism);ko04070(Phosphatidylinositol signaling system);ko01100(Metabolic pathways)
PC-3p-1355_7915	XM_016102135.2	1113	1133	1124	-29.6	-19.9	0.672297	9.5	3-11,1131-1123;13-20,1121-1114	1-2,1133-1132[UP5];12-12,1122-1122[SIL];21-21,1113-1113[UP3]	.((((((((.(((((((((..&..))))))))).)))))))).	AACUUGAUCUGAUUCUUGCAA&UGGUAAGAGUUUGAUUAAGUA	2	64.8361	2	0.94234	Output/R24h/cleaveLand_result/t_plot/PC-3p-1355_7915_XM_016102135.2_1124_TPlot.pdf	0	0	NA	NA	NA	64.8361	0	Inf	up	8.1306e-16	3.55976e-15	yes	GO:0016020(membrane)	ko00500(Starch and sucrose metabolism);ko01100(Metabolic pathways)
PC-3p-1355_7915	XM_016103128.2	366	391	382	-29.6	-20.2	0.682432	12.5	1-11,391-381;12-17,377-372;18-20,369-367	x-x,380-378[BULt];x-x,371-370[BULt];21-21,366-366[UP3]	.(((..((((((...(((((((((((&)))))))))))---))))))--))).	AGCUCAUGGUCAUGGAGCUCUUGCCA&UGGUAAGAGUU---UGAUUA--AGUA	0	0	NA	NA	NA	1	39.6024	4	0.996838	Output/R0h/cleaveLand_result/t_plot/PC-3p-1355_7915_XM_016103128.2_382_TPlot.pdf	0	39.6024	-Inf	down	3.1118e-10	6.0515e-10	yes	GO:1901363(heterocyclic compound binding);GO:0016740(transferase activity);GO:0000166(nucleotide binding);GO:1901265(nucleoside phosphate binding);GO:0016773(phosphotransferase activity, alcohol group as acceptor);GO:0005488(binding);GO:0016772(transferase activity, transferring phosphorus-containing groups);GO:0003824(catalytic activity);GO:0036094(small molecule binding);GO:0016310(phosphorylat…	NA
PC-3p-1355_7915	XM_016104429.2	823	846	837	-29.6	-19.7	0.665541	11.5	2-11,845-836;12-18,832-826	1-1,846-846[UP5];x-x,835-833[BULt];19-21,825-823[UP3]	...(((((((...((((((((((.&.))))))))))---)))))))...	AGAUUGAUCAGUCAGCUCUUACCG&UGGUAAGAGUU---UGAUUAAGUA	3	97.2542	3	0.578353	Output/R24h/cleaveLand_result/t_plot/PC-3p-1355_7915_XM_016104429.2_837_TPlot.pdf	2	79.2048	3	0.450841	Output/R0h/cleaveLand_result/t_plot/PC-3p-1355_7915_XM_016104429.2_837_TPlot.pdf	97.2542	79.2048	0.296173	up	0.17421	0.183533	yes	GO:0009987(cellular process);GO:0009123(nucleoside monophosphate metabolic process);GO:0017111(nucleoside-triphosphatase activity);GO:0006164(purine nucleotide biosynthetic process);GO:0043492(ATPase activity, coupled to movement of substances);GO:0009124(nucleoside monophosphate biosynthetic process);GO:0071704(organic substance metabolic process);GO:0005488(binding);GO:0019693(ribose phosphate …	ko00190(Oxidative phosphorylation)
PC-3p-1355_7915	XM_016105870.2	329	349	340	-29.6	-19.4	0.655405	7	2-14,348-336;16-21,334-329	1-1,349-349[UP5];15-15,335-335[SIL]	((((((.(((((((((((((.&.))))))))))))).))))))	UAUUUGUUCAAGCUUUUGCUG&UGGUAAGAGUUUGAUUAAGUA	1	32.4181	4	0.999997	Output/R24h/cleaveLand_result/t_plot/PC-3p-1355_7915_XM_016105870.2_340_TPlot.pdf	0	0	NA	NA	NA	32.4181	0	Inf	up	1.2429e-08	1.41251e-08	yes	GO:0000166(nucleotide binding);GO:0043167(ion binding);GO:0007154(cell communication);GO:0036094(small molecule binding);GO:0035556(intracellular signal transduction);GO:0005488(binding);GO:1901265(nucleoside phosphate binding);GO:0005525(GTP binding);GO:0097367(carbohydrate derivative binding);GO:0050789(regulation of biological process);GO:0065007(biological regulation);GO:0043168(anion binding…	NA
PC-3p-1355_7915	XM_016110755.2	860	882	871	-29.6	-19.26	0.650676	12	1-3,882-880;7-20,874-861	4-6,879-875[AILt];21-21,860-860[UP3]	.((((((((((((((.....(((&)))--...)))))))))))))).	AACUUAAUCAAAUUCGAAUUCCA&UGG--UAAGAGUUUGAUUAAGUA	1	32.4181	4	1	Output/R24h/cleaveLand_result/t_plot/PC-3p-1355_7915_XM_016110755.2_871_TPlot.pdf	0	0	NA	NA	NA	32.4181	0	Inf	up	1.2429e-08	1.41251e-08	yes	GO:0003824(catalytic activity);GO:0000287(magnesium ion binding);GO:0043169(cation binding);GO:0005488(binding);GO:0043168(anion binding);GO:1901363(heterocyclic compound binding);GO:0019842(vitamin binding);GO:0097159(organic cyclic compound binding);GO:0030976(thiamine pyrophosphate binding);GO:0036094(small molecule binding);GO:0046872(metal ion binding);GO:1901681(sulfur compound binding);GO:…	ko04146(Peroxisome)
PC-3p-1355_7915	XM_016114405.2	625	650	641	-29.6	-20.4	0.689189	11	3-16,648-635;17-21,629-625	1-2,650-649[UP5];x-x,634-630[BULt]	(((((.....((((((((((((((..&..))))))))))))))-----)))))	UACUUCUAAGGGUCAAGCUCUUGCAG&UGGUAAGAGUUUGAUU-----AAGUA	0	0	NA	NA	NA	2	79.2048	2	0.744936	Output/R0h/cleaveLand_result/t_plot/PC-3p-1355_7915_XM_016114405.2_641_TPlot.pdf	0	79.2048	-Inf	down	5.5905e-19	3.88279e-18	yes	GO:0005622(intracellular);GO:1901265(nucleoside phosphate binding);GO:0032561(guanyl ribonucleotide binding);GO:0050896(response to stimulus);GO:0007165(signal transduction);GO:0043167(ion binding);GO:0005623(cell);GO:0097367(carbohydrate derivative binding);GO:0097159(organic cyclic compound binding);GO:0016462(pyrophosphatase activity);GO:0032550(purine ribonucleoside binding);GO:0036094(small …	ko04144(Endocytosis)
PC-3p-1355_7915	XM_016115615.2	641	661	652	-29.6	-19.6	0.662162	9	3-12,659-650;14-19,648-643	1-2,661-660[UP5];13-13,649-649[SIL];20-21,642-641[UP3]	..((((((.((((((((((..&..)))))))))).))))))..	UUCUUGGUGAAGCUCUUGCAU&UGGUAAGAGUUUGAUUAAGUA	0	0	NA	NA	NA	1	39.6024	4	0.9998	Output/R0h/cleaveLand_result/t_plot/PC-3p-1355_7915_XM_016115615.2_652_TPlot.pdf	0	39.6024	-Inf	down	3.1118e-10	6.0515e-10	yes	GO:1901576(organic substance biosynthetic process);GO:0005488(binding);GO:0051186(cofactor metabolic process);GO:0032787(monocarboxylic acid metabolic process);GO:0043167(ion binding);GO:0003824(catalytic activity);GO:0097367(carbohydrate derivative binding);GO:1901265(nucleoside phosphate binding);GO:0043168(anion binding);GO:0032559(adenyl ribonucleotide binding);GO:0044237(cellular metabolic p…	ko01100(Metabolic pathways);ko00630(Glyoxylate and dicarboxylate metabolism);ko00620(Pyruvate metabolism);ko01200(Carbon metabolism);ko00010(Glycolysis / Gluconeogenesis);ko00640(Propanoate metabolism);ko01110(Biosynthesis of secondary metabolites)
PC-3p-1355_7915	XM_016115744.2	680	700	691	-29.6	-20.6	0.695946	11	6-20,695-681	1-5,700-696[UP5];21-21,680-680[UP3]	.(((((((((((((((.....&.....))))))))))))))).	GACUUAAUCAAGCUCUAAUAA&UGGUAAGAGUUUGAUUAAGUA	0	0	NA	NA	NA	1	39.6024	4	0.966088	Output/R0h/cleaveLand_result/t_plot/PC-3p-1355_7915_XM_016115744.2_691_TPlot.pdf	0	39.6024	-Inf	down	3.1118e-10	6.0515e-10	yes	GO:0016875(ligase activity, forming carbon-oxygen bonds);GO:0006418(tRNA aminoacylation for protein translation);GO:0036094(small molecule binding);GO:0043168(anion binding);GO:0044267(cellular protein metabolic process);GO:0032559(adenyl ribonucleotide binding);GO:0006520(cellular amino acid metabolic process);GO:0005623(cell);GO:0034641(cellular nitrogen compound metabolic process);GO:0006412(t…	ko00970(Aminoacyl-tRNA biosynthesis)
PC-3p-1355_7915	XM_016117018.2	553	573	564	-29.6	-19.5	0.658784	9	4-16,570-558;18-21,556-553	1-3,573-571[UP5];17-17,557-557[SIL]	((((.(((((((((((((...&...))))))))))))).))))	UGCUCGAUCAAGCUCUUGAUG&UGGUAAGAGUUUGAUUAAGUA	1	32.4181	4	0.999994	Output/R24h/cleaveLand_result/t_plot/PC-3p-1355_7915_XM_016117018.2_564_TPlot.pdf	1	39.6024	4	0.999937	Output/R0h/cleaveLand_result/t_plot/PC-3p-1355_7915_XM_016117018.2_564_TPlot.pdf	32.4181	39.6024	-0.28879	down	0.39723	0.398704	yes	NA	NA
PC-3p-1355_7915	XM_021127205.1	3277	3298	3288	-29.6	-20.1	0.679054	7.5	2-9,3297-3290;10-17,3288-3281	1-1,3298-3298[UP5];x-x,3289-3289[BULt];18-21,3280-3277[UP3]	....((((((((.((((((((.&.))))))))-))))))))....	GAAGUGAUCAAAUCUCUUACCG&UGGUAAGAG-UUUGAUUAAGUA	0	0	NA	NA	NA	2	79.2048	2	0.838242	Output/R0h/cleaveLand_result/t_plot/PC-3p-1355_7915_XM_021127205.1_3288_TPlot.pdf	0	79.2048	-Inf	down	5.5905e-19	3.88279e-18	yes	GO:0043167(ion binding);GO:0043169(cation binding);GO:0046872(metal ion binding);GO:0005488(binding)	ko04120(Ubiquitin mediated proteolysis)
PC-3p-1355_7915	XM_021129324.1	2859	2879	2870	-29.6	-19.7	0.665541	8.5	3-18,2877-2862	1-2,2879-2878[UP5];19-21,2861-2859[UP3]	...((((((((((((((((..&..))))))))))))))))...	CCAUUAGUCAAGCUCUUAUAU&UGGUAAGAGUUUGAUUAAGUA	3	97.2542	2	0.96756	Output/R24h/cleaveLand_result/t_plot/PC-3p-1355_7915_XM_021129324.1_2870_TPlot.pdf	3	118.807	2	0.919209	Output/R0h/cleaveLand_result/t_plot/PC-3p-1355_7915_XM_021129324.1_2870_TPlot.pdf	97.2542	118.807	-0.28879	down	0.14255	0.150851	yes	GO:0016887(ATPase activity);GO:0009058(biosynthetic process);GO:1901566(organonitrogen compound biosynthetic process);GO:1901293(nucleoside phosphate biosynthetic process);GO:0032553(ribonucleotide binding);GO:0009127(purine nucleoside monophosphate biosynthetic process);GO:0055086(nucleobase-containing small molecule metabolic process);GO:0055085(transmembrane transport);GO:0003824(catalytic act…	ko00190(Oxidative phosphorylation)
PC-3p-1355_7915	XM_021136611.1	538	558	549	-29.6	-19.8	0.668919	7.5	2-12,557-547;14-20,545-539	1-1,558-558[UP5];13-13,546-546[SIL];21-21,538-538[UP3]	.(((((((.(((((((((((.&.))))))))))).))))))).	AGCUUGGUGGAACUCUUGUCU&UGGUAAGAGUUUGAUUAAGUA	0	0	NA	NA	NA	1	39.6024	4	0.999407	Output/R0h/cleaveLand_result/t_plot/PC-3p-1355_7915_XM_021136611.1_549_TPlot.pdf	0	39.6024	-Inf	down	3.1118e-10	6.0515e-10	yes	GO:0016020(membrane);GO:0005215(transporter activity);GO:0044425(membrane part);GO:0016021(integral component of membrane);GO:0051179(localization);GO:0005886(plasma membrane);GO:0055085(transmembrane transport);GO:0005623(cell);GO:0031224(intrinsic component of membrane);GO:0006810(transport);GO:0051234(establishment of localization);GO:0044464(cell part);GO:0022857(transmembrane transporter act…	ko00909(Sesquiterpenoid and triterpenoid biosynthesis);ko00100(Steroid biosynthesis);ko01110(Biosynthesis of secondary metabolites);ko01100(Metabolic pathways)
PC-3p-1355_7915	XM_021138053.1	2043	2072	2063	-29.6	-19.3	0.652027	14	1-13,2072-2060;14-20,2050-2044	x-x,2059-2051[BULt];21-21,2043-2043[UP3]	.(((((((.........(((((((((((((&)))))))))))))---------))))))).	GGCUUGAUGAAGACAUCCGAACUCUUGCUA&UGGUAAGAGUUUG---------AUUAAGUA	0	0	NA	NA	NA	1	39.6024	4	0.999989	Output/R0h/cleaveLand_result/t_plot/PC-3p-1355_7915_XM_021138053.1_2063_TPlot.pdf	0	39.6024	-Inf	down	3.1118e-10	6.0515e-10	yes	GO:0098791(Golgi subcompartment);GO:0005622(intracellular);GO:0045229(external encapsulating structure organization);GO:0044431(Golgi apparatus part);GO:0012505(endomembrane system);GO:0098588(bounding membrane of organelle);GO:0005623(cell);GO:0016740(transferase activity);GO:0016043(cellular component organization);GO:0031090(organelle membrane);GO:0044425(membrane part);GO:0016020(membrane);GO…	NA
PC-3p-1355_7915	XM_021138868.1	7053	7074	7065	-29.6	-19.5	0.658784	6.5	2-9,7073-7066;11-13,7064-7062;14-21,7060-7053	1-1,7074-7074[UP5];10-10,7065-7065[SIL];x-x,7061-7061[BULt]	((((((((.(((.((((((((.&.)))))))).)))-))))))))	UGCUUAAUGCAACUUCUUGCCU&UGGUAAGAGUUUG-AUUAAGUA	1	32.4181	4	0.999993	Output/R24h/cleaveLand_result/t_plot/PC-3p-1355_7915_XM_021138868.1_7065_TPlot.pdf	0	0	NA	NA	NA	32.4181	0	Inf	up	1.2429e-08	1.41251e-08	yes	NA	NA
PC-3p-139105_48	XM_016087637.2	261	286	278	-46.1	-31	0.672451	13	1-2,286-285;4-4,284-284;6-11,282-277;12-23,273-262	3-3,x-x[BULq];5-5,283-283[SIL];x-x,276-274[BULt];24-24,261-261[UP3]	.((((((((((((...((((((.(-((&)).).))))))---)))))))))))).	UGGGUGCGAGUCGGAAGCUUCAGG-GA&UCACGUGAAGU---CGACUUGCACCUG	1	32.4181	4	0.785428	Output/R24h/cleaveLand_result/t_plot/PC-3p-139105_48_XM_016087637.2_278_TPlot.pdf	0	0	NA	NA	NA	32.4181	0	Inf	up	1.2429e-08	1.41251e-08	yes	GO:2000112(regulation of cellular macromolecule biosynthetic process);GO:0044464(cell part);GO:0051246(regulation of protein metabolic process);GO:0044248(cellular catabolic process);GO:0043228(non-membrane-bounded organelle);GO:0005737(cytoplasm);GO:0019439(aromatic compound catabolic process);GO:0006139(nucleobase-containing compound metabolic process);GO:0043170(macromolecule metabolic process…	ko03018(RNA degradation)
PC-3p-139105_48	XM_016087645.2	262	287	279	-46.1	-31	0.672451	13	1-2,287-286;4-4,285-285;6-11,283-278;12-23,274-263	3-3,x-x[BULq];5-5,284-284[SIL];x-x,277-275[BULt];24-24,262-262[UP3]	.((((((((((((...((((((.(-((&)).).))))))---)))))))))))).	UGGGUGCGAGUCGGAAGCUUCAGG-GA&UCACGUGAAGU---CGACUUGCACCUG	0	0	NA	NA	NA	1	39.6024	4	0.691811	Output/R0h/cleaveLand_result/t_plot/PC-3p-139105_48_XM_016087645.2_279_TPlot.pdf	0	39.6024	-Inf	down	3.1118e-10	6.0515e-10	yes	GO:2000112(regulation of cellular macromolecule biosynthetic process);GO:0044464(cell part);GO:0051246(regulation of protein metabolic process);GO:0044248(cellular catabolic process);GO:0043228(non-membrane-bounded organelle);GO:0005737(cytoplasm);GO:0019439(aromatic compound catabolic process);GO:0006139(nucleobase-containing compound metabolic process);GO:0043170(macromolecule metabolic process…	ko03018(RNA degradation)
PC-3p-139105_48	XM_016115562.2	203	228	220	-46.1	-31	0.672451	13	1-2,228-227;4-4,226-226;6-11,224-219;12-23,215-204	3-3,x-x[BULq];5-5,225-225[SIL];x-x,218-216[BULt];24-24,203-203[UP3]	.((((((((((((...((((((.(-((&)).).))))))---)))))))))))).	UGGGUGCGAGUCGGAAGCUUCAGG-GA&UCACGUGAAGU---CGACUUGCACCUG	1	32.4181	4	0.775339	Output/R24h/cleaveLand_result/t_plot/PC-3p-139105_48_XM_016115562.2_220_TPlot.pdf	1	39.6024	4	0.697427	Output/R0h/cleaveLand_result/t_plot/PC-3p-139105_48_XM_016115562.2_220_TPlot.pdf	32.4181	39.6024	-0.28879	down	0.39723	0.398704	yes	GO:0051248(negative regulation of protein metabolic process);GO:0090304(nucleic acid metabolic process);GO:0048523(negative regulation of cellular process);GO:0016070(RNA metabolic process);GO:0030529(intracellular ribonucleoprotein complex);GO:0009890(negative regulation of biosynthetic process);GO:0010629(negative regulation of gene expression);GO:2001141(regulation of RNA biosynthetic process)…	ko03018(RNA degradation)
PC-3p-141131_47	BGI_novel_T012337	597	625	612	-38.6	-25.1	0.650259	19.5	4-9,622-617;10-12,612-610;13-22,608-599	1-3,625-623[UP5];x-x,616-613[BULt];x-x,609-609[BULt];23-24,598-597[UP3]	..((((((((((.(((....((((((...&...))))))----)))-))))))))))..	UGUCCGUGCCGAUCGUGCUUGCCAUUGAU&AUAAAUGGU----AUG-UUGGCACGGAAU	0	0	NA	NA	NA	1	39.6024	4	0.913364	Output/R0h/cleaveLand_result/t_plot/PC-3p-141131_47_BGI_novel_T012337_612_TPlot.pdf	0	39.6024	-Inf	down	3.1118e-10	6.0515e-10	yes	GO:0003824(catalytic activity);GO:0016310(phosphorylation);GO:0006790(sulfur compound metabolic process);GO:0016773(phosphotransferase activity, alcohol group as acceptor);GO:0000103(sulfate assimilation);GO:0009987(cellular process);GO:0070566(adenylyltransferase activity);GO:0004779(sulfate adenylyltransferase activity);GO:0044237(cellular metabolic process);GO:0016779(nucleotidyltransferase ac…	ko00450(Selenocompound metabolism);ko01100(Metabolic pathways);ko00230(Purine metabolism);ko00261(Monobactam biosynthesis);ko00920(Sulfur metabolism)
PC-3p-141131_47	XM_016084691.2	758	781	772	-38.6	-26	0.673575	18	8-21,774-761	1-7,781-775[UP5];22-24,760-758[UP3]	...((((((((((((((.......&.......))))))))))))))...	UCGCCGUGCCGGCGUACAUGGCUG&AUAAAUGGUAUGUUGGCACGGAAU	3	97.2542	2	0.315048	Output/R24h/cleaveLand_result/t_plot/PC-3p-141131_47_XM_016084691.2_772_TPlot.pdf	1	39.6024	4	0.601307	Output/R0h/cleaveLand_result/t_plot/PC-3p-141131_47_XM_016084691.2_772_TPlot.pdf	97.2542	39.6024	1.29617	up	8.2959e-07	9.29693e-07	yes	NA	NA
PC-3p-141131_47	XM_016086012.2	597	625	612	-38.6	-25.1	0.650259	19.5	4-9,622-617;10-12,612-610;13-22,608-599	1-3,625-623[UP5];x-x,616-613[BULt];x-x,609-609[BULt];23-24,598-597[UP3]	..((((((((((.(((....((((((...&...))))))----)))-))))))))))..	UGUCCGUGCCGAUCGUGCUUGCCAUUGAU&AUAAAUGGU----AUG-UUGGCACGGAAU	1	32.4181	4	0.957025	Output/R24h/cleaveLand_result/t_plot/PC-3p-141131_47_XM_016086012.2_612_TPlot.pdf	0	0	NA	NA	NA	32.4181	0	Inf	up	1.2429e-08	1.41251e-08	yes	GO:0003824(catalytic activity);GO:0016310(phosphorylation);GO:0006790(sulfur compound metabolic process);GO:0016773(phosphotransferase activity, alcohol group as acceptor);GO:0000103(sulfate assimilation);GO:0009987(cellular process);GO:0070566(adenylyltransferase activity);GO:0004779(sulfate adenylyltransferase activity);GO:0044237(cellular metabolic process);GO:0016779(nucleotidyltransferase ac…	ko00450(Selenocompound metabolism);ko01100(Metabolic pathways);ko00230(Purine metabolism);ko00261(Monobactam biosynthesis);ko00920(Sulfur metabolism)
PC-3p-141131_47	XM_016105053.2	417	441	432	-38.6	-28.7	0.743523	11.5	5-17,437-425;18-21,423-420	1-4,441-438[UP5];x-x,424-424[BULt];22-24,419-417[UP3]	...((((.(((((((((((((....&....)))))))))))))-))))...	CAGCCGUAGCCGACAUACCAUAUGG&AUAAAUGGUAUGUUGGC-ACGGAAU	0	0	NA	NA	NA	2	79.2048	2	0.0273871	Output/R0h/cleaveLand_result/t_plot/PC-3p-141131_47_XM_016105053.2_432_TPlot.pdf	0	79.2048	-Inf	down	5.5905e-19	3.88279e-18	yes	GO:0044281(small molecule metabolic process);GO:0055114(oxidation-reduction process);GO:0008152(metabolic process);GO:0019752(carboxylic acid metabolic process);GO:0016639(oxidoreductase activity, acting on the CH-NH2 group of donors, NAD or NADP as acceptor);GO:0009987(cellular process);GO:0006520(cellular amino acid metabolic process);GO:0016638(oxidoreductase activity, acting on the CH-NH2 gro…	ko00910(Nitrogen metabolism);ko01100(Metabolic pathways);ko01200(Carbon metabolism);ko00220(Arginine biosynthesis);ko00250(Alanine, aspartate and glutamate metabolism)
PC-3p-146105_44	BGI_novel_T001993	1191	1214	1206	-38.9	-26.2	0.673522	7.5	2-7,1213-1208;9-9,1206-1206;11-15,1205-1201;16-23,1199-1192	1-1,1214-1214[UP5];8-8,1207-1207[SIL];10-10,x-x[BULq];x-x,1200-1200[BULt];24-24,1191-1191[UP3]	.((((((((.(((((-(.((((((.&.)))))).).)))))-)))))))).	UGACUCAGGUUGCAG-ACACUUCAG&AUGAAGUUUACUGCA-CCUGAGUUU	0	0	NA	NA	NA	1	39.6024	4	0.922416	Output/R0h/cleaveLand_result/t_plot/PC-3p-146105_44_BGI_novel_T001993_1206_TPlot.pdf	0	39.6024	-Inf	down	3.1118e-10	6.0515e-10	yes	GO:0046483(heterocycle metabolic process);GO:0006397(mRNA processing);GO:0044260(cellular macromolecule metabolic process);GO:1901360(organic cyclic compound metabolic process);GO:0005622(intracellular);GO:0019538(protein metabolic process);GO:0043229(intracellular organelle);GO:0006139(nucleobase-containing compound metabolic process);GO:1901564(organonitrogen compound metabolic process);GO:0044…	ko04120(Ubiquitin mediated proteolysis);ko03040(Spliceosome)
PC-3p-146105_44	BGI_novel_T005882	1892	1915	1906	-38.9	-27.1	0.696658	6	2-10,1914-1906;12-20,1904-1896;22-24,1894-1892	1-1,1915-1915[UP5];11-11,1905-1905[SIL];21-21,1895-1895[SIL]	(((.(((((((((.(((((((((.&.))))))))).))))))))).)))	AAAGUCAGGUGCAAUGAAUUUCAC&AUGAAGUUUACUGCACCUGAGUUU	0	0	NA	NA	NA	1	39.6024	4	0.815849	Output/R0h/cleaveLand_result/t_plot/PC-3p-146105_44_BGI_novel_T005882_1906_TPlot.pdf	0	39.6024	-Inf	down	3.1118e-10	6.0515e-10	yes	NA	NA
PC-3p-146105_44	XM_016088029.2	1244	1270	1258	-38.9	-25.4	0.652956	12	1-9,1270-1262;10-18,1258-1250;21-23,1247-1245	x-x,1261-1259[BULt];19-20,1249-1248[SIL];24-24,1244-1244[UP3]	.(((..(((((((((...(((((((((&)))))))))---)))))))))..))).	UGAUGAAGGUGCGGUUUCAAGCUUCAU&AUGAAGUUU---ACUGCACCUGAGUUU	1	32.4181	4	0.980767	Output/R24h/cleaveLand_result/t_plot/PC-3p-146105_44_XM_016088029.2_1258_TPlot.pdf	0	0	NA	NA	NA	32.4181	0	Inf	up	1.2429e-08	1.41251e-08	yes	GO:0005622(intracellular);GO:0044464(cell part);GO:0044424(intracellular part);GO:0043226(organelle);GO:0005634(nucleus);GO:0016020(membrane);GO:0005737(cytoplasm);GO:0043229(intracellular organelle);GO:0016021(integral component of membrane);GO:0043231(intracellular membrane-bounded organelle);GO:0044425(membrane part);GO:0005623(cell);GO:0031224(intrinsic component of membrane);GO:0043227(membr…	NA
PC-3p-146105_44	XM_021141145.1	2022	2045	2036	-38.9	-27.1	0.696658	6	2-10,2044-2036;12-20,2034-2026;22-24,2024-2022	1-1,2045-2045[UP5];11-11,2035-2035[SIL];21-21,2025-2025[SIL]	(((.(((((((((.(((((((((.&.))))))))).))))))))).)))	AAAGUCAGGUGCAAUGAAUUUCAC&AUGAAGUUUACUGCACCUGAGUUU	0	0	NA	NA	NA	2	79.2048	2	0.396735	Output/R0h/cleaveLand_result/t_plot/PC-3p-146105_44_XM_021141145.1_2036_TPlot.pdf	0	79.2048	-Inf	down	5.5905e-19	3.88279e-18	yes	NA	NA
PC-3p-148259_43	BGI_novel_T007792	836	860	851	-33	-23.1	0.7	7	2-9,859-852;11-16,850-845;19-24,841-836	1-1,860-860[UP5];10-10,851-851[SIL];17-18,844-842[AILt]	((((((...((((((.((((((((.&.)))))))).))))))-..))))))	GGUAUUGUAAGUUGUGUUGAUCGUA&AACGAUUAAAACAACU-GAAAUACC	1	32.4181	4	0.223291	Output/R24h/cleaveLand_result/t_plot/PC-3p-148259_43_BGI_novel_T007792_851_TPlot.pdf	0	0	NA	NA	NA	32.4181	0	Inf	up	1.2429e-08	1.41251e-08	yes	GO:1901564(organonitrogen compound metabolic process);GO:0008236(serine-type peptidase activity);GO:0019538(protein metabolic process);GO:0004252(serine-type endopeptidase activity);GO:0008152(metabolic process);GO:0006508(proteolysis);GO:0070011(peptidase activity, acting on L-amino acid peptides);GO:0043170(macromolecule metabolic process);GO:0044238(primary metabolic process);GO:0008233(peptid…	NA
PC-3p-148259_43	XM_016086951.2	529	553	543	-33	-22.1	0.669697	12	4-9,550-545;12-24,541-529	1-3,553-551[UP5];10-11,544-542[AILt]	(((((((((((((...((((((...&...))))))-..)))))))))))))	GGUGUUUCGGUUGCUAUUAAUCCAU&AACGAUUAA-AACAACUGAAAUACC	0	0	NA	NA	NA	1	39.6024	4	0.391382	Output/R0h/cleaveLand_result/t_plot/PC-3p-148259_43_XM_016086951.2_543_TPlot.pdf	0	39.6024	-Inf	down	3.1118e-10	6.0515e-10	yes	NA	NA
PC-3p-148259_43	XM_016105393.2	1224	1245	1238	-33	-27.9	0.845455	5.5	1-8,1245-1238;11-24,1237-1224	9-10,x-x[BULq]	((((((((((((((--((((((((&))))))))..))))))))))))))	GGUGUUUCAGUUGU--UGAUCGUU&AACGAUUAAAACAACUGAAAUACC	1	32.4181	4	0.0449041	Output/R24h/cleaveLand_result/t_plot/PC-3p-148259_43_XM_016105393.2_1238_TPlot.pdf	0	0	NA	NA	NA	32.4181	0	Inf	up	1.2429e-08	1.41251e-08	yes	GO:0012505(endomembrane system);GO:0003824(catalytic activity);GO:0042175(nuclear outer membrane-endoplasmic reticulum membrane network);GO:0016255(attachment of GPI anchor to protein);GO:0090407(organophosphate biosynthetic process);GO:0031227(intrinsic component of endoplasmic reticulum membrane);GO:0005789(endoplasmic reticulum membrane);GO:0044424(intracellular part);GO:0006650(glycerophospho…	ko00563(Glycosylphosphatidylinositol (GPI)-anchor biosynthesis);ko01100(Metabolic pathways)
PC-3p-148998_43	BGI_novel_T001329	1286	1313	1299	-40.7	-26.6	0.653563	12	1-6,1313-1308;7-17,1302-1292;19-19,1291-1291;21-24,1289-1286	x-x,1307-1303[BULt];18-18,x-x[BULq];20-20,1290-1290[SIL]	((((.(-(((((((((((.....((((((&))))))-----))))))))))).).))))	AGCCUC-AAAACCAGUCAUUGCUUCAAUG&CAUUGA-----UGACUGGUUUUAGUGGCU	1	32.4181	4	0.98917	Output/R24h/cleaveLand_result/t_plot/PC-3p-148998_43_BGI_novel_T001329_1299_TPlot.pdf	0	0	NA	NA	NA	32.4181	0	Inf	up	1.2429e-08	1.41251e-08	yes	GO:0010467(gene expression);GO:0044237(cellular metabolic process);GO:0044260(cellular macromolecule metabolic process);GO:0044425(membrane part);GO:0006518(peptide metabolic process);GO:0016485(protein processing);GO:0044267(cellular protein metabolic process);GO:0003824(catalytic activity);GO:0006807(nitrogen compound metabolic process);GO:0016787(hydrolase activity);GO:0019538(protein metaboli…	NA
PC-3p-148998_43	BGI_novel_T001711	552	575	566	-40.7	-28.6	0.702703	11	1-2,575-574;4-7,571-568;9-23,567-553	3-3,573-572[AILt];8-8,x-x[BULq];24-24,552-552[UP3]	.(((((((((((((((-((((..((&))-.)))).))))))))))))))).	CGCCACUGAAGCCGGU-GUCGUUUG&CA-UUGAUGACUGGUUUUAGUGGCU	0	0	NA	NA	NA	1	39.6024	4	0.622709	Output/R0h/cleaveLand_result/t_plot/PC-3p-148998_43_BGI_novel_T001711_566_TPlot.pdf	0	39.6024	-Inf	down	3.1118e-10	6.0515e-10	yes	NA	NA
PC-3p-148998_43	BGI_novel_T010545	796	820	811	-40.7	-29.6	0.727273	10.5	1-10,820-811;12-23,808-797	11-11,810-809[AILt];24-24,796-796[UP3]	.((((((((((((..((((((((((&))))))))))-.)))))))))))).	CGCUGCUGGAGCUUCGUCGUCAGUG&CAUUGAUGAC-UGGUUUUAGUGGCU	0	0	NA	NA	NA	1	39.6024	4	0.368579	Output/R0h/cleaveLand_result/t_plot/PC-3p-148998_43_BGI_novel_T010545_811_TPlot.pdf	0	39.6024	-Inf	down	3.1118e-10	6.0515e-10	yes	GO:0009987(cellular process);GO:0015301(anion:anion antiporter activity);GO:0006839(mitochondrial transport);GO:0005623(cell);GO:0022804(active transmembrane transporter activity);GO:0031966(mitochondrial membrane);GO:0008509(anion transmembrane transporter activity);GO:0031967(organelle envelope);GO:0005743(mitochondrial inner membrane);GO:0051649(establishment of localization in cell);GO:007184…	NA
PC-3p-148998_43	XM_016078657.2	650	673	664	-40.7	-26.9	0.660934	11	5-16,669-658;18-23,656-651	1-4,673-670[UP5];17-17,657-657[SIL];24-24,650-650[UP3]	.((((((.((((((((((((....&....)))))))))))).)))))).	UGUCACUUGAACCAGUCAUUGGAG&CAUUGAUGACUGGUUUUAGUGGCU	0	0	NA	NA	NA	1	39.6024	4	0.935449	Output/R0h/cleaveLand_result/t_plot/PC-3p-148998_43_XM_016078657.2_664_TPlot.pdf	0	39.6024	-Inf	down	3.1118e-10	6.0515e-10	yes	GO:0009987(cellular process);GO:0016903(oxidoreductase activity, acting on the aldehyde or oxo group of donors);GO:0008152(metabolic process);GO:0055114(oxidation-reduction process);GO:0003824(catalytic activity);GO:0016491(oxidoreductase activity);GO:0006081(cellular aldehyde metabolic process);GO:0044237(cellular metabolic process);GO:0004030(aldehyde dehydrogenase [NAD(P)+] activity);GO:000402…	ko00410(beta-Alanine metabolism);ko01100(Metabolic pathways);ko00280(Valine, leucine and isoleucine degradation);ko00330(Arginine and proline metabolism);ko00620(Pyruvate metabolism);ko00010(Glycolysis / Gluconeogenesis);ko00340(Histidine metabolism);ko01110(Biosynthesis of secondary metabolites);ko00053(Ascorbate and aldarate metabolism);ko00561(Glycerolipid metabolism);ko00310(Lysine degradatio…
PC-3p-148998_43	XM_016094590.2	4208	4234	4224	-40.7	-26.68	0.655528	12	4-9,4231-4226;10-16,4224-4218;19-24,4213-4208	1-3,4234-4232[UP5];x-x,4225-4225[BULt];17-18,4217-4214[AILt]	((((((....(((((((.((((((...&...))))))-)))))))--..))))))	AGCCACGCACGAGCCAGUUCAUCAUCA&CAUUGAUGA-CUGGUUU--UAGUGGCU	0	0	NA	NA	NA	4	158.41	2	0.649948	Output/R0h/cleaveLand_result/t_plot/PC-3p-148998_43_XM_016094590.2_4224_TPlot.pdf	0	158.41	-Inf	down	2.5027e-36	8.44623e-35	yes	GO:0070887(cellular response to chemical stimulus);GO:0071365(cellular response to auxin stimulus);GO:1901363(heterocyclic compound binding);GO:0005634(nucleus);GO:0051716(cellular response to stimulus);GO:0060255(regulation of macromolecule metabolic process);GO:0031326(regulation of cellular biosynthetic process);GO:0042221(response to chemical);GO:0051252(regulation of RNA metabolic process);G…	ko04075(Plant hormone signal transduction)
PC-3p-148998_43	XM_016096959.2	2041	2066	2057	-40.7	-26.8	0.658477	8	1-2,2066-2065;4-8,2063-2059;10-15,2057-2052;16-24,2049-2041	3-3,2064-2064[SIL];9-9,2058-2058[SIL];x-x,2051-2050[BULt]	(((((((((..((((((.(((((.((&)).))))).))))))--)))))))))	GGCUACUAACAGGCCAGACAUCAUUG&CAUUGAUGACUGGUU--UUAGUGGCU	3	97.2542	2	0.72587	Output/R24h/cleaveLand_result/t_plot/PC-3p-148998_43_XM_016096959.2_2057_TPlot.pdf	1	39.6024	4	0.956929	Output/R0h/cleaveLand_result/t_plot/PC-3p-148998_43_XM_016096959.2_2057_TPlot.pdf	97.2542	39.6024	1.29617	up	8.2959e-07	9.29693e-07	yes	GO:0016462(pyrophosphatase activity);GO:1901363(heterocyclic compound binding);GO:0005623(cell);GO:0005488(binding);GO:0032559(adenyl ribonucleotide binding);GO:0000166(nucleotide binding);GO:0005886(plasma membrane);GO:0016787(hydrolase activity);GO:0043167(ion binding);GO:0003824(catalytic activity);GO:0009987(cellular process);GO:1901265(nucleoside phosphate binding);GO:0043168(anion binding);…	ko04141(Protein processing in endoplasmic reticulum)
PC-3p-148998_43	XM_016110132.2	1993	2019	2007	-40.7	-26.6	0.653563	11.5	1-3,2019-2017;4-12,2013-2005;14-17,2003-2000;20-24,1997-1993	x-x,2016-2014[BULt];13-13,2004-2004[SIL];18-19,1999-1998[SIL]	(((((..((((.(((((((((...(((&)))---))))))))).))))..)))))	GGCCAGAAGGAGCAGUCAUCAUCCGUG&CAU---UGAUGACUGGUUUUAGUGGCU	0	0	NA	NA	NA	1	39.6024	4	0.975193	Output/R0h/cleaveLand_result/t_plot/PC-3p-148998_43_XM_016110132.2_2007_TPlot.pdf	0	39.6024	-Inf	down	3.1118e-10	6.0515e-10	yes	GO:0005802(trans-Golgi network);GO:0005622(intracellular);GO:0031224(intrinsic component of membrane);GO:0044431(Golgi apparatus part);GO:0008168(methyltransferase activity);GO:0005768(endosome);GO:0043231(intracellular membrane-bounded organelle);GO:0098791(Golgi subcompartment);GO:0044422(organelle part);GO:0016021(integral component of membrane);GO:0098588(bounding membrane of organelle);GO:00…	NA
PC-3p-148998_43	XM_016114481.2	559	583	573	-40.7	-27.9	0.685504	6	2-5,582-579;6-14,577-569;17-24,566-559	1-1,583-583[UP5];x-x,578-578[BULt];15-16,568-567[SIL]	((((((((..(((((((((.((((.&.))))-)))))))))..))))))))	AGCUGCUACUACCAGUCAUACAAUU&CAUUG-AUGACUGGUUUUAGUGGCU	0	0	NA	NA	NA	1	39.6024	4	0.805403	Output/R0h/cleaveLand_result/t_plot/PC-3p-148998_43_XM_016114481.2_573_TPlot.pdf	0	39.6024	-Inf	down	3.1118e-10	6.0515e-10	yes	NA	ko03015(mRNA surveillance pathway)
PC-3p-148998_43	XM_016116434.2	800	826	816	-40.7	-26.8	0.658477	7	1-6,826-821;7-10,819-816;11-19,814-806;21-24,803-800	x-x,820-820[BULt];x-x,815-815[BULt];20-20,805-804[AILt]	((((..(((((((((.((((.((((((&))))))-))))-)))))))))-.))))	AGCCUUCUAAAACCAGGUCAUUUAAUG&CAUUGA-UGAC-UGGUUUUAG-UGGCU	0	0	NA	NA	NA	1	39.6024	4	0.953641	Output/R0h/cleaveLand_result/t_plot/PC-3p-148998_43_XM_016116434.2_816_TPlot.pdf	0	39.6024	-Inf	down	3.1118e-10	6.0515e-10	yes	NA	NA
PC-3p-148998_43	XM_021124576.1	346	370	360	-40.7	-27.9	0.685504	6	2-5,369-366;6-14,364-356;17-24,353-346	1-1,370-370[UP5];x-x,365-365[BULt];15-16,355-354[SIL]	((((((((..(((((((((.((((.&.))))-)))))))))..))))))))	AGCUGCUACUACCAGUCAUACAAUU&CAUUG-AUGACUGGUUUUAGUGGCU	1	32.4181	4	0.864467	Output/R24h/cleaveLand_result/t_plot/PC-3p-148998_43_XM_021124576.1_360_TPlot.pdf	0	0	NA	NA	NA	32.4181	0	Inf	up	1.2429e-08	1.41251e-08	yes	NA	ko03015(mRNA surveillance pathway)
[truncated: 16,237 more rows]
