# Supplementary material for: Integration of Small RNA and Degradome Sequencing Reveals the Regulatory Network of Al-Induced Programmed Cell Death in Peanut
Source: Int J Mol Sci. 2021 Dec 27;23(1):246. doi: 10.3390/ijms23010246 (PMC8745729; doi:10.3390/ijms23010246)
Supplement: Supplementary file 1 [file ijms-23-00246-s001.zip › Table S5-5 The predicted targets of known and novel miRNAs in S0hvsS8hvsS24h.xlsx]

## Sheet: S0hvsS8hvsS24h
Table S5-5 The predicted targets of known and novel miRNAs in S0hvsS8hvsS24h
Item	Description
TStart	Start position of mRNA and miRNA alignment region
TStop	End position of mRNA and miRNA alignment region
TSlice	Degradation site
AllenScore	Penalty score of mismatched bases between the miRNA and its target (the lower the value, the better)
Paired	Paired position (format is miRNA (5 '- 3'), mRNA (3 '- 5'), " ;" for segmentation.)
Unpaired	Unpaired position
Structure	Secondary structure
DegradomeCategory	Category 0:over one raw read at the position, abundance at the position is equal to the maximum on the transcript, and there is only one maximum on the transcript
	Category 1:over one raw read at the position, abundance at the position is equal to the maximum on the transcript, and there is more than one maximum position on the transcript
	Category 2:over one raw read at the position, abundance at position is less than the maximum but higher than the median for the transcript
	Category 3:over one raw read at the position, abundance at the position is equal to or less than the median for the transcript
	Category 4:only one raw read at the position
Query	Transcript	TStart	TStop	TSlice	MFEperfect	MFEsite	MFEratio	AllenScore	Paired	Unpaired	Structure	Sequence	DegradomeRawReads(S0h)	DegradomeNormReads(S0h)	DegradomeCategory(S0h)	DegradomePval(S0h)	Tplot_file_path(S0h)	DegradomeRawReads(S8h)	DegradomeNormReads(S8h)	DegradomeCategory(S8h)	DegradomePval(S8h)	Tplot_file_path(S8h)	DegradomeRawReads(S24h)	DegradomeNormReads(S24h)	DegradomeCategory(S24h)	DegradomePval(S24h)	Tplot_file_path(S24h)	S0h	S8h	S24h	pvalue	qvalue	significant	GO	KEGG
PC-3p-100264_81	BGI_novel_T000262	2187	2217	2201	-52.3	-34.3	0.655832	19	1-8,2217-2210;9-9,2202-2202;11-16,2200-2195;19-24,2192-2187	x-x,2209-2203[BULt];10-10,2201-2201[SIL];17-18,2194-2193[SIL]	((((((..((((((.(.......((((((((&))))))))-------).))))))..))))))	GGCUACCAGCCAGGGUGUUGCAAGAGGCCAA&UUGGCCUU-------AGCCUGGCCUGUAGCC	0	0	NA	NA	NA	1	33.3045	4	0.978273	Output/S8h/cleaveLand_result/t_plot/PC-3p-100264_81_BGI_novel_T000262_2201_TPlot.pdf	0	0	NA	NA	NA	0	33.3045	0	3.4347e-15	7.86611e-15	yes	GO:0016788(hydrolase activity, acting on ester bonds);GO:0008081(phosphoric diester hydrolase activity);GO:0005488(binding);GO:0006793(phosphorus metabolic process);GO:0043169(cation binding);GO:0097164(ammonium ion metabolic process);GO:0009056(catabolic process);GO:0071704(organic substance metabolic process);GO:0042578(phosphoric ester hydrolase activity);GO:0044255(cellular lipid metabolic pr…	ko01100(Metabolic pathways);ko00565(Ether lipid metabolism);ko01110(Biosynthesis of secondary metabolites);ko04144(Endocytosis);ko00564(Glycerophospholipid metabolism)
PC-3p-100264_81	BGI_novel_T007846	2931	2962	2953	-52.3	-35.8	0.684512	10.5	1-14,2962-2949;15-16,2946-2945;17-18,2943-2942;19-24,2936-2931	x-x,2948-2947[BULt];x-x,2944-2944[BULt];x-x,2941-2937[BULt]	((((((.....((.((..((((((((((((((&))))))))))))))--))-))-----))))))	GGCUAUGAAAUGGAGCAUCAGGCUGAGGCCAG&UUGGCCUUAGCCUG--GC-CU-----GUAGCC	0	0	NA	NA	NA	0	0	NA	NA	NA	1	26.8255	4	0.791273	Output/S24h/cleaveLand_result/t_plot/PC-3p-100264_81_BGI_novel_T007846_2953_TPlot.pdf	0	0	26.8255	2.2374e-12	2.55455e-12	yes	GO:0044238(primary metabolic process);GO:0044260(cellular macromolecule metabolic process);GO:0043231(intracellular membrane-bounded organelle);GO:0016311(dephosphorylation);GO:0043226(organelle);GO:0005622(intracellular);GO:0044267(cellular protein metabolic process);GO:0043412(macromolecule modification);GO:0005623(cell);GO:0004721(phosphoprotein phosphatase activity);GO:0003824(catalytic activ…	ko03013(RNA transport);ko03040(Spliceosome);ko03015(mRNA surveillance pathway)
PC-3p-100264_81	BGI_novel_T007847	2913	2944	2935	-52.3	-35.8	0.684512	10.5	1-14,2944-2931;15-16,2928-2927;17-18,2925-2924;19-24,2918-2913	x-x,2930-2929[BULt];x-x,2926-2926[BULt];x-x,2923-2919[BULt]	((((((.....((.((..((((((((((((((&))))))))))))))--))-))-----))))))	GGCUAUGAAAUGGAGCAUCAGGCUGAGGCCAG&UUGGCCUUAGCCUG--GC-CU-----GUAGCC	0	0	NA	NA	NA	2	66.6089	2	0.353258	Output/S8h/cleaveLand_result/t_plot/PC-3p-100264_81_BGI_novel_T007847_2935_TPlot.pdf	2	53.6509	2	0.409529	Output/S24h/cleaveLand_result/t_plot/PC-3p-100264_81_BGI_novel_T007847_2935_TPlot.pdf	0	66.6089	53.6509	3.0735e-14	6.76143e-14	yes	GO:0044238(primary metabolic process);GO:0044260(cellular macromolecule metabolic process);GO:0043231(intracellular membrane-bounded organelle);GO:0016311(dephosphorylation);GO:0043226(organelle);GO:0005622(intracellular);GO:0044267(cellular protein metabolic process);GO:0043412(macromolecule modification);GO:0005623(cell);GO:0004721(phosphoprotein phosphatase activity);GO:0003824(catalytic activ…	ko03013(RNA transport);ko03040(Spliceosome);ko03015(mRNA surveillance pathway)
PC-3p-100264_81	BGI_novel_T007848	2913	2944	2935	-52.3	-35.8	0.684512	10.5	1-14,2944-2931;15-16,2928-2927;17-18,2925-2924;19-24,2918-2913	x-x,2930-2929[BULt];x-x,2926-2926[BULt];x-x,2923-2919[BULt]	((((((.....((.((..((((((((((((((&))))))))))))))--))-))-----))))))	GGCUAUGAAAUGGAGCAUCAGGCUGAGGCCAG&UUGGCCUUAGCCUG--GC-CU-----GUAGCC	0	0	NA	NA	NA	0	0	NA	NA	NA	1	26.8255	4	0.785931	Output/S24h/cleaveLand_result/t_plot/PC-3p-100264_81_BGI_novel_T007848_2935_TPlot.pdf	0	0	26.8255	2.2374e-12	2.55455e-12	yes	GO:0044238(primary metabolic process);GO:0044260(cellular macromolecule metabolic process);GO:0043231(intracellular membrane-bounded organelle);GO:0016311(dephosphorylation);GO:0043226(organelle);GO:0005622(intracellular);GO:0044267(cellular protein metabolic process);GO:0043412(macromolecule modification);GO:0005623(cell);GO:0004721(phosphoprotein phosphatase activity);GO:0003824(catalytic activ…	ko03013(RNA transport);ko03040(Spliceosome);ko03015(mRNA surveillance pathway)
PC-3p-100264_81	XM_016078049.2	565	593	584	-52.3	-36.5	0.697897	11.5	1-2,593-592;4-17,590-577;18-20,571-569;22-24,567-565	3-3,591-591[SIL];x-x,576-572[BULt];21-21,568-568[SIL]	(((.(((.....((((((((((((((.((&)).))))))))))))))-----))).)))	GGUAACAGGAUCGGCCAGGCUGGGGCGGA&UUGGCCUUAGCCUGGCC-----UGUAGCC	0	0	NA	NA	NA	1	33.3045	4	0.607817	Output/S8h/cleaveLand_result/t_plot/PC-3p-100264_81_XM_016078049.2_584_TPlot.pdf	0	0	NA	NA	NA	0	33.3045	0	3.4347e-15	7.86611e-15	yes	NA	ko01100(Metabolic pathways);ko00790(Folate biosynthesis)
PC-3p-100264_81	XM_016078383.2	1779	1801	1792	-52.3	-36	0.688337	5.5	1-9,1801-1793;11-18,1791-1784;20-21,1782-1781;23-24,1780-1779	10-10,1792-1792[SIL];19-19,1783-1783[SIL];22-22,x-x[BULq]	((-((.((((((((.(((((((((&))))))))).)))))))).)).))	GG-UAGAGGCCGGGGUAAGGCUAA&UUGGCCUUAGCCUGGCCUGUAGCC	1	30.281	4	0.694281	Output/S0h/cleaveLand_result/t_plot/PC-3p-100264_81_XM_016078383.2_1792_TPlot.pdf	0	0	NA	NA	NA	0	0	NA	NA	NA	30.281	0	0	7.0631e-14	1.09903e-13	yes	NA	ko04120(Ubiquitin mediated proteolysis)
PC-3p-100264_81	XM_016079178.2	576	601	592	-52.3	-38.5	0.736138	8.5	2-2,600-600;4-13,598-589;14-20,587-581;22-24,578-576	1-1,601-601[UP5];3-3,599-599[SIL];x-x,588-588[BULt];21-21,580-579[AILt]	(((..(((((((.((((((((((.(.&.).))))))))))-)))))))-.)))	GGCGGGCGGGCCUGGGCUAGGGCGAC&UUGGCCUUAGCCU-GGCCUGU-AGCC	1	30.281	4	0.235338	Output/S0h/cleaveLand_result/t_plot/PC-3p-100264_81_XM_016079178.2_592_TPlot.pdf	0	0	NA	NA	NA	1	26.8255	4	0.261576	Output/S24h/cleaveLand_result/t_plot/PC-3p-100264_81_XM_016079178.2_592_TPlot.pdf	30.281	0	26.8255	5.3891e-07	5.57092e-07	yes	GO:0016021(integral component of membrane);GO:0016020(membrane);GO:0044425(membrane part);GO:0031224(intrinsic component of membrane)	NA
PC-3p-100264_81	XM_016080711.2	375	402	392	-52.3	-35.7	0.6826	12	3-5,400-398;6-12,396-390;13-18,388-383;19-23,380-376	1-2,402-401[UP5];x-x,397-397[BULt];x-x,389-389[BULt];x-x,382-381[BULt];24-24,375-375[UP3]	.(((((..((((((.(((((((.(((..&..)))-)))))))-))))))--))))).	AGCUGCUGGGGCCAGGGCUGAGAGCCUC&UUGGC-CUUAGCC-UGGCCU--GUAGCC	0	0	NA	NA	NA	0	0	NA	NA	NA	1	26.8255	4	0.867554	Output/S24h/cleaveLand_result/t_plot/PC-3p-100264_81_XM_016080711.2_392_TPlot.pdf	0	0	26.8255	2.2374e-12	2.55455e-12	yes	NA	NA
PC-3p-100264_81	XM_016082554.2	1544	1567	1558	-52.3	-34.7	0.66348	9	2-8,1566-1560;10-13,1558-1555;16-20,1552-1548;22-24,1546-1544	1-1,1567-1567[UP5];9-9,1559-1559[SIL];14-15,1554-1553[SIL];21-21,1547-1547[SIL]	(((.(((((..((((.(((((((.&.))))))).))))..))))).)))	GGCCGCGGGAAAGGCCGGGGCCAU&UUGGCCUUAGCCUGGCCUGUAGCC	0	0	NA	NA	NA	0	0	NA	NA	NA	3	80.4764	2	0.727339	Output/S24h/cleaveLand_result/t_plot/PC-3p-100264_81_XM_016082554.2_1558_TPlot.pdf	0	0	80.4764	1.1184e-35	1.47636e-34	yes	GO:0005215(transporter activity);GO:0022857(transmembrane transporter activity);GO:0015291(secondary active transmembrane transporter activity);GO:0006811(ion transport);GO:0006817(phosphate ion transport);GO:0051234(establishment of localization);GO:0031224(intrinsic component of membrane);GO:0055085(transmembrane transport);GO:0016020(membrane);GO:0015698(inorganic anion transport);GO:0022804(a…	NA
PC-3p-100264_81	XM_016083974.2	1332	1355	1346	-52.3	-34.3	0.655832	11	4-6,1352-1350;8-20,1348-1336;22-23,1334-1333	1-3,1355-1353[UP5];7-7,1349-1349[SIL];21-21,1335-1335[SIL];24-24,1332-1332[UP3]	.((.(((((((((((((.(((...&...))).))))))))))))).)).	CGCGGCAGGUCAGGCUGCGGCAUA&UUGGCCUUAGCCUGGCCUGUAGCC	0	0	NA	NA	NA	0	0	NA	NA	NA	1	26.8255	4	0.99019	Output/S24h/cleaveLand_result/t_plot/PC-3p-100264_81_XM_016083974.2_1346_TPlot.pdf	0	0	26.8255	2.2374e-12	2.55455e-12	yes	GO:0006810(transport);GO:0044425(membrane part);GO:0032559(adenyl ribonucleotide binding);GO:0022857(transmembrane transporter activity);GO:0017076(purine nucleotide binding);GO:0097367(carbohydrate derivative binding);GO:1901363(heterocyclic compound binding);GO:0042626(ATPase activity, coupled to transmembrane movement of substances);GO:0032553(ribonucleotide binding);GO:0000166(nucleotide bind…	ko02010(ABC transporters)
PC-3p-100264_81	XM_016087415.2	1036	1058	1050	-52.3	-34.3	0.655832	9.5	2-8,1057-1051;11-12,1049-1048;14-23,1046-1037	1-1,1058-1058[UP5];9-10,1050-1050[AILq];13-13,1047-1047[SIL];24-24,1036-1036[UP3]	.((((((((((.((.-(((((((.&.)))))))..)).)))))))))).	AGCUGCGGGCUUGGG-GAGGCCAU&UUGGCCUUAGCCUGGCCUGUAGCC	1	30.281	4	0.984377	Output/S0h/cleaveLand_result/t_plot/PC-3p-100264_81_XM_016087415.2_1050_TPlot.pdf	0	0	NA	NA	NA	5	134.127	2	0.804694	Output/S24h/cleaveLand_result/t_plot/PC-3p-100264_81_XM_016087415.2_1050_TPlot.pdf	30.281	0	134.127	6.0586e-40	1.06002e-38	yes	NA	ko00750(Vitamin B6 metabolism)
PC-3p-100264_81	XM_016095616.2	565	589	580	-52.3	-36.1	0.690249	9.5	1-8,589-582;11-18,579-572;20-23,569-566	9-10,581-580[SIL];19-19,571-570[AILt];24-24,565-565[UP3]	.((((..((((((((..((((((((&))))))))..))))))))-.)))).	AGCUAAAGGGCCAGGAGGAGGCCGA&UUGGCCUUAGCCUGGCCU-GUAGCC	0	0	NA	NA	NA	1	33.3045	4	0.662078	Output/S8h/cleaveLand_result/t_plot/PC-3p-100264_81_XM_016095616.2_580_TPlot.pdf	0	0	NA	NA	NA	0	33.3045	0	3.4347e-15	7.86611e-15	yes	GO:0071704(organic substance metabolic process);GO:0090304(nucleic acid metabolic process);GO:0006396(RNA processing);GO:0008152(metabolic process);GO:0044237(cellular metabolic process);GO:0043170(macromolecule metabolic process);GO:0044260(cellular macromolecule metabolic process);GO:0034641(cellular nitrogen compound metabolic process);GO:0006725(cellular aromatic compound metabolic process);G…	ko03040(Spliceosome);ko03018(RNA degradation)
PC-3p-100264_81	XM_016099536.2	7829	7853	7843	-52.3	-34.1	0.652008	9	1-5,7853-7849;6-14,7847-7839;16-21,7837-7832;23-24,7830-7829	x-x,7848-7848[BULt];15-15,7838-7838[SIL];22-22,7831-7831[SIL]	((.((((((.(((((((((.(((((&)))))-))))))))).)))))).))	GGGUGCAGGGCAGGUUGAGUGUUAG&UUGGC-CUUAGCCUGGCCUGUAGCC	2	60.562	2	0.800684	Output/S0h/cleaveLand_result/t_plot/PC-3p-100264_81_XM_016099536.2_7843_TPlot.pdf	0	0	NA	NA	NA	0	0	NA	NA	NA	60.562	0	0	4.9856e-27	3.03728e-26	yes	NA	NA
PC-3p-100264_81	XM_016099540.2	7816	7840	7830	-52.3	-34.1	0.652008	9	1-5,7840-7836;6-14,7834-7826;16-21,7824-7819;23-24,7817-7816	x-x,7835-7835[BULt];15-15,7825-7825[SIL];22-22,7818-7818[SIL]	((.((((((.(((((((((.(((((&)))))-))))))))).)))))).))	GGGUGCAGGGCAGGUUGAGUGUUAG&UUGGC-CUUAGCCUGGCCUGUAGCC	1	30.281	4	0.991067	Output/S0h/cleaveLand_result/t_plot/PC-3p-100264_81_XM_016099540.2_7830_TPlot.pdf	0	0	NA	NA	NA	0	0	NA	NA	NA	30.281	0	0	7.0631e-14	1.09903e-13	yes	NA	NA
PC-3p-100264_81	XM_016100348.2	746	775	761	-52.3	-35.8	0.684512	15.5	2-7,774-769;8-9,763-762;11-14,760-757;15-24,755-746	1-1,775-775[UP5];x-x,768-764[BULt];10-10,761-761[SIL];x-x,756-756[BULt]	((((((((((.((((.((.....((((((.&.))))))-----)).))))-))))))))))	GGCUGCGGGUACAGGGUACUGGAAGGCCAC&UUGGCCU-----UAGCCUG-GCCUGUAGCC	0	0	NA	NA	NA	1	33.3045	4	0.714961	Output/S8h/cleaveLand_result/t_plot/PC-3p-100264_81_XM_016100348.2_761_TPlot.pdf	3	80.4764	3	0.137681	Output/S24h/cleaveLand_result/t_plot/PC-3p-100264_81_XM_016100348.2_761_TPlot.pdf	0	33.3045	80.4764	1.8863e-19	7.85498e-19	yes	GO:0071704(organic substance metabolic process);GO:0044271(cellular nitrogen compound biosynthetic process);GO:1901360(organic cyclic compound metabolic process);GO:0044260(cellular macromolecule metabolic process);GO:0034654(nucleobase-containing compound biosynthetic process);GO:0008152(metabolic process);GO:0034641(cellular nitrogen compound metabolic process);GO:0009059(macromolecule biosynth…	ko03015(mRNA surveillance pathway);ko03018(RNA degradation);ko04120(Ubiquitin mediated proteolysis);ko00561(Glycerolipid metabolism);ko03013(RNA transport);ko01100(Metabolic pathways);ko04141(Protein processing in endoplasmic reticulum)
PC-3p-100264_81	XM_016102022.2	1217	1240	1231	-52.3	-34	0.650096	7.5	2-9,1239-1232;11-20,1230-1221;22-23,1219-1218	1-1,1240-1240[UP5];10-10,1231-1231[SIL];21-21,1220-1220[SIL];24-24,1217-1217[UP3]	.((.((((((((((.((((((((.&.)))))))).)))))))))).)).	UGUAGCAGGUCAGGAUAGGGCCAU&UUGGCCUUAGCCUGGCCUGUAGCC	0	0	NA	NA	NA	0	0	NA	NA	NA	1	26.8255	4	0.99643	Output/S24h/cleaveLand_result/t_plot/PC-3p-100264_81_XM_016102022.2_1231_TPlot.pdf	0	0	26.8255	2.2374e-12	2.55455e-12	yes	NA	ko00511(Other glycan degradation)
PC-3p-100264_81	XM_016102391.2	826	851	840	-52.3	-34.9	0.667304	12.5	3-6,849-846;7-23,843-827	1-2,851-850[UP5];x-x,845-844[BULt];24-24,826-826[UP3]	.(((((((((((((((((..((((..&..))))--))))))))))))))))).	UGUUGCGGGCCAGGUUGAUCGGUCUC&UUGGCC--UUAGCCUGGCCUGUAGCC	3	90.843	2	0.622958	Output/S0h/cleaveLand_result/t_plot/PC-3p-100264_81_XM_016102391.2_840_TPlot.pdf	0	0	NA	NA	NA	0	0	NA	NA	NA	90.843	0	0	3.5171e-40	6.21445e-39	yes	GO:0043168(anion binding);GO:1901363(heterocyclic compound binding);GO:1901265(nucleoside phosphate binding);GO:0016491(oxidoreductase activity);GO:0097367(carbohydrate derivative binding);GO:0055114(oxidation-reduction process);GO:0010181(FMN binding);GO:0043167(ion binding);GO:0008152(metabolic process);GO:0003824(catalytic activity);GO:0032553(ribonucleotide binding);GO:0048037(cofactor bindin…	ko01110(Biosynthesis of secondary metabolites);ko04146(Peroxisome);ko00630(Glyoxylate and dicarboxylate metabolism);ko01100(Metabolic pathways);ko01200(Carbon metabolism)
PC-3p-100264_81	XM_016102694.2	2127	2150	2142	-52.3	-34	0.650096	9.5	3-7,2148-2144;9-13,2143-2139;15-23,2136-2128	1-2,2150-2149[UP5];8-8,x-x[BULq];14-14,2138-2137[AILt];24-24,2127-2127[UP3]	.(((((((((..(((((-(((((..&..))))).)))))-.))))))))).	UGCUACAGGCAUGGGCU-AGGCUUU&UUGGCCUUAGCCU-GGCCUGUAGCC	0	0	NA	NA	NA	5	166.522	2	0.799156	Output/S8h/cleaveLand_result/t_plot/PC-3p-100264_81_XM_016102694.2_2142_TPlot.pdf	0	0	NA	NA	NA	0	166.522	0	4.7451e-73	3.68438e-71	yes	GO:0033365(protein localization to organelle);GO:0051179(localization);GO:0051169(nuclear transport);GO:0046907(intracellular transport);GO:0043229(intracellular organelle);GO:0070013(intracellular organelle lumen);GO:0031090(organelle membrane);GO:0042277(peptide binding);GO:0008565(protein transporter activity);GO:0006913(nucleocytoplasmic transport);GO:0031267(small GTPase binding);GO:0005635(…	NA
PC-3p-100264_81	XM_016103586.2	1592	1615	1607	-52.3	-34.38	0.657361	7.5	1-8,1615-1608;10-15,1607-1602;16-17,1600-1599;21-24,1595-1592	9-9,x-x[BULq];x-x,1601-1601[BULt];18-20,1598-1596[SIL]	((((...((.((((((-((((((((&)))))))).))))))-))...))))	GGCUUGUGGUCCGGGC-AGGGCCAA&UUGGCCUUAGCCUGG-CCUGUAGCC	1	30.281	4	0.977151	Output/S0h/cleaveLand_result/t_plot/PC-3p-100264_81_XM_016103586.2_1607_TPlot.pdf	3	99.9134	2	0.706983	Output/S8h/cleaveLand_result/t_plot/PC-3p-100264_81_XM_016103586.2_1607_TPlot.pdf	0	0	NA	NA	NA	30.281	99.9134	0	5.4045e-27	3.2466e-26	yes	GO:0003824(catalytic activity);GO:0005886(plasma membrane);GO:0005623(cell);GO:0001871(pattern binding);GO:0044464(cell part);GO:0016021(integral component of membrane);GO:0030246(carbohydrate binding);GO:0016798(hydrolase activity, acting on glycosyl bonds);GO:0044425(membrane part);GO:0044459(plasma membrane part);GO:0030247(polysaccharide binding);GO:0071704(organic substance metabolic process…	ko00500(Starch and sucrose metabolism)
PC-3p-100264_81	XM_016108967.2	207	231	222	-52.3	-37.3	0.713193	7	1-8,231-224;10-12,222-220;14-16,218-216;17-23,214-208	9-9,223-223[SIL];13-13,219-219[SIL];x-x,215-215[BULt];24-24,207-207[UP3]	.(((((((.(((.(((.((((((((&)))))))).))).)))-))))))).	AGCUGCGGUGCCCGGCGGAGGCCAA&UUGGCCUUAGCCUGGC-CUGUAGCC	0	0	NA	NA	NA	0	0	NA	NA	NA	2	53.6509	3	0.05611	Output/S24h/cleaveLand_result/t_plot/PC-3p-100264_81_XM_016108967.2_222_TPlot.pdf	0	0	53.6509	5.0035e-24	2.27989e-23	yes	NA	NA
PC-3p-100264_81	XM_016113267.2	2913	2944	2935	-52.3	-35.8	0.684512	10.5	1-14,2944-2931;15-16,2928-2927;17-18,2925-2924;19-24,2918-2913	x-x,2930-2929[BULt];x-x,2926-2926[BULt];x-x,2923-2919[BULt]	((((((.....((.((..((((((((((((((&))))))))))))))--))-))-----))))))	GGCUAUGAAAUGGAGCAUCAGGCUGAGGCCAG&UUGGCCUUAGCCUG--GC-CU-----GUAGCC	1	30.281	4	0.790956	Output/S0h/cleaveLand_result/t_plot/PC-3p-100264_81_XM_016113267.2_2935_TPlot.pdf	1	33.3045	4	0.774432	Output/S8h/cleaveLand_result/t_plot/PC-3p-100264_81_XM_016113267.2_2935_TPlot.pdf	0	0	NA	NA	NA	30.281	33.3045	0	1.1203e-07	1.21623e-07	yes	GO:0044238(primary metabolic process);GO:0044260(cellular macromolecule metabolic process);GO:0043231(intracellular membrane-bounded organelle);GO:0016311(dephosphorylation);GO:0043226(organelle);GO:0005622(intracellular);GO:0044267(cellular protein metabolic process);GO:0043412(macromolecule modification);GO:0005623(cell);GO:0004721(phosphoprotein phosphatase activity);GO:0003824(catalytic activ…	ko03013(RNA transport);ko03040(Spliceosome);ko03015(mRNA surveillance pathway)
PC-3p-100264_81	XM_016114588.2	476	499	490	-52.3	-34.6	0.661568	8.5	1-11,499-489;12-13,487-486;15-18,484-481;22-24,478-476	x-x,488-488[BULt];14-14,485-485[SIL];19-21,480-479[AILq]	(((..-((((.((.(((((((((((&)))))))))))-)).))))...)))	GGCGA-GGGCGGGCGUUAAGGCCAG&UUGGCCUUAGC-CUGGCCUGUAGCC	1	30.281	4	0.964266	Output/S0h/cleaveLand_result/t_plot/PC-3p-100264_81_XM_016114588.2_490_TPlot.pdf	0	0	NA	NA	NA	3	80.4764	3	0.312086	Output/S24h/cleaveLand_result/t_plot/PC-3p-100264_81_XM_016114588.2_490_TPlot.pdf	30.281	0	80.4764	3.6664e-20	1.56643e-19	yes	GO:0046395(carboxylic acid catabolic process);GO:0045548(phenylalanine ammonia-lyase activity);GO:0003824(catalytic activity);GO:0044424(intracellular part);GO:0016840(carbon-nitrogen lyase activity);GO:0009698(phenylpropanoid metabolic process);GO:0006807(nitrogen compound metabolic process);GO:0008152(metabolic process);GO:1901564(organonitrogen compound metabolic process);GO:0009063(cellular a…	ko01100(Metabolic pathways);ko00360(Phenylalanine metabolism);ko00940(Phenylpropanoid biosynthesis);ko01110(Biosynthesis of secondary metabolites)
PC-3p-100264_81	XM_016117981.2	481	505	495	-52.3	-34	0.650096	9	3-6,503-500;7-13,498-492;14-19,490-485;21-24,484-481	1-2,505-504[UP5];x-x,499-499[BULt];x-x,491-491[BULt];20-20,x-x[BULq]	((((-((((((.(((((((.((((..&..))))-)))))))-)))))).))))	GGUU-CGGGCCGAGGCUAACGGCUCC&UUGGCC-UUAGCCU-GGCCUGUAGCC	0	0	NA	NA	NA	0	0	NA	NA	NA	1	26.8255	4	0.996854	Output/S24h/cleaveLand_result/t_plot/PC-3p-100264_81_XM_016117981.2_495_TPlot.pdf	0	0	26.8255	2.2374e-12	2.55455e-12	yes	GO:0005488(binding);GO:0097159(organic cyclic compound binding);GO:1901363(heterocyclic compound binding)	ko03040(Spliceosome)
PC-3p-100264_81	XM_016117982.2	482	506	496	-52.3	-34	0.650096	9	3-6,504-501;7-13,499-493;14-19,491-486;21-24,485-482	1-2,506-505[UP5];x-x,500-500[BULt];x-x,492-492[BULt];20-20,x-x[BULq]	((((-((((((.(((((((.((((..&..))))-)))))))-)))))).))))	GGUU-CGGGCCGAGGCUAACGGCUCC&UUGGCC-UUAGCCU-GGCCUGUAGCC	2	60.562	2	0.822373	Output/S0h/cleaveLand_result/t_plot/PC-3p-100264_81_XM_016117982.2_496_TPlot.pdf	0	0	NA	NA	NA	1	26.8255	4	0.996606	Output/S24h/cleaveLand_result/t_plot/PC-3p-100264_81_XM_016117982.2_496_TPlot.pdf	60.562	0	26.8255	1.8594e-14	4.12939e-14	yes	GO:0005488(binding);GO:0097159(organic cyclic compound binding);GO:1901363(heterocyclic compound binding)	ko03040(Spliceosome)
PC-3p-100264_81	XM_021127228.1	482	506	496	-52.3	-34	0.650096	9	3-6,504-501;7-13,499-493;14-19,491-486;21-24,485-482	1-2,506-505[UP5];x-x,500-500[BULt];x-x,492-492[BULt];20-20,x-x[BULq]	((((-((((((.(((((((.((((..&..))))-)))))))-)))))).))))	GGUU-CGGGCCGAGGCUAACGGCUCC&UUGGCC-UUAGCCU-GGCCUGUAGCC	1	30.281	4	0.993612	Output/S0h/cleaveLand_result/t_plot/PC-3p-100264_81_XM_021127228.1_496_TPlot.pdf	0	0	NA	NA	NA	0	0	NA	NA	NA	30.281	0	0	7.0631e-14	1.09903e-13	yes	GO:0005488(binding);GO:0097159(organic cyclic compound binding);GO:1901363(heterocyclic compound binding)	ko03040(Spliceosome)
PC-3p-100264_81	XM_021132109.1	2326	2352	2341	-52.3	-35.2	0.67304	10.5	1-5,2352-2348;6-8,2346-2344;10-13,2341-2338;14-20,2336-2330;22-24,2328-2326	x-x,2347-2347[BULt];9-9,2343-2342[AILt];x-x,2337-2337[BULt];21-21,2329-2329[SIL]	(((.(((((((.((((..(((.(((((&)))))-)))-.))))-))))))).)))	GGCAGCAGGCCGAGGCCGGGGAGCCAA&UUGGC-CUU-AGCCU-GGCCUGUAGCC	1	30.281	4	0.906536	Output/S0h/cleaveLand_result/t_plot/PC-3p-100264_81_XM_021132109.1_2341_TPlot.pdf	0	0	NA	NA	NA	0	0	NA	NA	NA	30.281	0	0	7.0631e-14	1.09903e-13	yes	GO:0032559(adenyl ribonucleotide binding);GO:0097159(organic cyclic compound binding);GO:0000166(nucleotide binding);GO:0006468(protein phosphorylation);GO:0071704(organic substance metabolic process);GO:0016740(transferase activity);GO:0006464(cellular protein modification process);GO:0006793(phosphorus metabolic process);GO:0044267(cellular protein metabolic process);GO:1901564(organonitrogen c…	NA
PC-3p-100264_81	XM_021138127.1	554	577	568	-52.3	-34.3	0.655832	5.5	1-12,577-566;14-16,565-563;17-18,561-560;20-20,558-558;22-24,556-554	13-13,x-x[BULq];x-x,562-562[BULt];19-19,559-559[SIL];21-21,557-557[SIL]	(((.(.((.(((-((((((((((((&)))))))))))).)))-)).).)))	GGCAAGAGAGCU-GGCUGAGGCCAA&UUGGCCUUAGCCUGGC-CUGUAGCC	0	0	NA	NA	NA	0	0	NA	NA	NA	1	26.8255	4	0.987047	Output/S24h/cleaveLand_result/t_plot/PC-3p-100264_81_XM_021138127.1_568_TPlot.pdf	0	0	26.8255	2.2374e-12	2.55455e-12	yes	GO:0016021(integral component of membrane);GO:0031224(intrinsic component of membrane);GO:0044425(membrane part);GO:0016020(membrane)	NA
PC-3p-100264_81	XM_021142147.1	745	772	762	-52.3	-36.5	0.697897	10	1-6,772-767;8-20,764-752;21-24,748-745	7-7,766-765[AILt];x-x,751-749[BULt]	((((...(((((((((((((..((((((&))))))-.)))))))))))))---))))	GGCUGAAACAGGUCGGGCUGCUGGUCAA&UUGGCC-UUAGCCUGGCCUGU---AGCC	1	30.281	4	0.60019	Output/S0h/cleaveLand_result/t_plot/PC-3p-100264_81_XM_021142147.1_762_TPlot.pdf	0	0	NA	NA	NA	0	0	NA	NA	NA	30.281	0	0	7.0631e-14	1.09903e-13	yes	NA	NA
PC-3p-101862_79	BGI_novel_T011691	1063	1086	1077	-45.4	-31.2	0.687225	8	1-1,1086-1086;3-4,1084-1083;6-15,1081-1072;18-24,1069-1063	2-2,1085-1085[SIL];5-5,1082-1082[SIL];16-17,1071-1070[SIL]	(((((((..((((((((((.((.(&).)).))))))))))..)))))))	GGGUGGAGGUGGGUGCAGUGGAGU&AGUCGACUGCACCUGAAUUCACCU	3	90.843	2	0.292214	Output/S0h/cleaveLand_result/t_plot/PC-3p-101862_79_BGI_novel_T011691_1077_TPlot.pdf	0	0	NA	NA	NA	0	0	NA	NA	NA	90.843	0	0	3.5171e-40	6.21445e-39	yes	NA	ko00860(Porphyrin and chlorophyll metabolism);ko00053(Ascorbate and aldarate metabolism);ko00040(Pentose and glucuronate interconversions);ko01110(Biosynthesis of secondary metabolites);ko01100(Metabolic pathways);ko00906(Carotenoid biosynthesis)
PC-3p-101862_79	XM_016080550.2	983	1006	997	-45.4	-29.6	0.651982	7.5	2-13,1005-994;15-16,992-991;18-22,989-985	1-1,1006-1006[UP5];14-14,993-993[SIL];17-17,990-990[SIL];23-24,984-983[UP3]	..(((((.((.((((((((((((.&.)))))))))))).)).)))))..	UCGUGGAAUCCGGUGCAGUUGGCG&AGUCGACUGCACCUGAAUUCACCU	0	0	NA	NA	NA	0	0	NA	NA	NA	1	26.8255	4	0.883275	Output/S24h/cleaveLand_result/t_plot/PC-3p-101862_79_XM_016080550.2_997_TPlot.pdf	0	0	26.8255	2.2374e-12	2.55455e-12	yes	NA	ko04120(Ubiquitin mediated proteolysis)
PC-3p-101862_79	XM_016096771.2	852	878	866	-45.4	-31.5	0.693833	14	1-4,878-875;7-8,872-871;9-23,867-853	5-6,874-873[SIL];x-x,870-868[BULt];24-24,852-852[UP3]	.(((((((((((((((...((..((((&))))..))---))))))))))))))).	CGGUGGAUUCGGGUGCUGCGGAGGGCU&AGUCGACU---GCACCUGAAUUCACCU	1	30.281	4	0.617676	Output/S0h/cleaveLand_result/t_plot/PC-3p-101862_79_XM_016096771.2_866_TPlot.pdf	1	33.3045	4	0.599385	Output/S8h/cleaveLand_result/t_plot/PC-3p-101862_79_XM_016096771.2_866_TPlot.pdf	0	0	NA	NA	NA	30.281	33.3045	0	1.1203e-07	1.21623e-07	yes	GO:0044260(cellular macromolecule metabolic process);GO:0006470(protein dephosphorylation);GO:1901564(organonitrogen compound metabolic process);GO:0006807(nitrogen compound metabolic process);GO:0008152(metabolic process);GO:0006796(phosphate-containing compound metabolic process);GO:0016787(hydrolase activity);GO:0009987(cellular process);GO:0044237(cellular metabolic process);GO:0044238(primar…	NA
PC-3p-104925_76	XM_016098876.1	625	647	639	-36.9	-25.9	0.701897	8.5	3-9,645-639;11-13,638-636;16-24,633-625	1-2,647-646[UP5];10-10,x-x[BULq];14-15,635-634[SIL]	(((((((((..(((-(((((((..&..))))))).)))..)))))))))	GAACUCAGGCUCAG-CAGUUUCGG&AUGAAAUUGACUGUACCUGAGUUU	2	60.562	2	0.525261	Output/S0h/cleaveLand_result/t_plot/PC-3p-104925_76_XM_016098876.1_639_TPlot.pdf	0	0	NA	NA	NA	0	0	NA	NA	NA	60.562	0	0	4.9856e-27	3.03728e-26	yes	GO:0016310(phosphorylation);GO:0031224(intrinsic component of membrane);GO:0071704(organic substance metabolic process);GO:0004672(protein kinase activity);GO:0044260(cellular macromolecule metabolic process);GO:0043170(macromolecule metabolic process);GO:0004714(transmembrane receptor protein tyrosine kinase activity);GO:0044425(membrane part);GO:0016773(phosphotransferase activity, alcohol grou…	NA
PC-3p-105086_75	XM_016088691.2	1028	1053	1043	-41.8	-27.2	0.650718	7	1-3,1053-1051;4-16,1049-1037;17-19,1035-1033;21-23,1031-1029	x-x,1050-1050[BULt];x-x,1036-1036[BULt];20-20,1032-1032[SIL];24-24,1028-1028[UP3]	.(((.(((.(((((((((((((.(((&)))-)))))))))))))-))).))).	UACUAAGGUUGUAGUUGACUUCAAUG&CGU-GAAGUCGACUACA-CCUAAGUU	1	30.281	4	0.642481	Output/S0h/cleaveLand_result/t_plot/PC-3p-105086_75_XM_016088691.2_1043_TPlot.pdf	0	0	NA	NA	NA	0	0	NA	NA	NA	30.281	0	0	7.0631e-14	1.09903e-13	yes	GO:0034641(cellular nitrogen compound metabolic process);GO:0046483(heterocycle metabolic process);GO:0006366(transcription from RNA polymerase II promoter);GO:0009058(biosynthetic process);GO:0006367(transcription initiation from RNA polymerase II promoter);GO:0003723(RNA binding);GO:0009059(macromolecule biosynthetic process);GO:1901576(organic substance biosynthetic process);GO:0003677(DNA bin…	ko03022(Basal transcription factors)
PC-3p-105086_75	XM_016102202.2	290	314	305	-41.8	-29.3	0.700957	5.5	2-7,313-308;9-15,306-300;16-24,298-290	1-1,314-314[UP5];8-8,307-307[SIL];x-x,299-299[BULt]	(((((((((.(((((((.((((((.&.)))))).)))))))-)))))))))	AAUUUGGGUGGUGGUCGCCUUCACC&CGUGAAGUCGACUAC-ACCUAAGUU	0	0	NA	NA	NA	1	33.3045	4	0.482877	Output/S8h/cleaveLand_result/t_plot/PC-3p-105086_75_XM_016102202.2_305_TPlot.pdf	0	0	NA	NA	NA	0	33.3045	0	3.4347e-15	7.86611e-15	yes	GO:0045735(nutrient reservoir activity)	NA
PC-3p-1060_9765	BGI_novel_T002090	361	378	372	-37	-25.22	0.681622	11	1-2,378-377;8-21,374-361	3-7,376-375[AILq]	((((((((((((((..---((&)).....))))))))))))))	UGGCUGUUCUUCUGUU---GG&CCUAUUUCGGAAGAACAGCCA	3	90.843	2	0.402248	Output/S0h/cleaveLand_result/t_plot/PC-3p-1060_9765_BGI_novel_T002090_372_TPlot.pdf	0	0	NA	NA	NA	3	80.4764	2	0.444729	Output/S24h/cleaveLand_result/t_plot/PC-3p-1060_9765_BGI_novel_T002090_372_TPlot.pdf	90.843	0	80.4764	1.5625e-19	6.61009e-19	yes	GO:0017171(serine hydrolase activity);GO:0019538(protein metabolic process);GO:0070011(peptidase activity, acting on L-amino acid peptides);GO:0044260(cellular macromolecule metabolic process);GO:0008152(metabolic process);GO:0008236(serine-type peptidase activity);GO:1901565(organonitrogen compound catabolic process);GO:0004185(serine-type carboxypeptidase activity);GO:0044238(primary metabolic …	NA
PC-3p-1060_9765	BGI_novel_T005114	641	662	652	-37	-24.2	0.654054	7	3-8,660-655;9-19,653-643	1-2,662-661[UP5];x-x,654-654[BULt];20-21,642-641[UP3]	..(((((((((((.((((((..&..))))))-)))))))))))..	UCGCUGUUCUUCCAGAAAUACU&CCUAUUUC-GGAAGAACAGCCA	1	30.281	4	0.991264	Output/S0h/cleaveLand_result/t_plot/PC-3p-1060_9765_BGI_novel_T005114_652_TPlot.pdf	0	0	NA	NA	NA	0	0	NA	NA	NA	30.281	0	0	7.0631e-14	1.09903e-13	yes	NA	NA
PC-3p-1060_9765	BGI_novel_T007984	1056	1078	1069	-37	-25.1	0.678378	8	1-7,1078-1072;9-17,1070-1062;18-20,1059-1057	8-8,1071-1071[SIL];x-x,1061-1060[BULt];21-21,1056-1056[UP3]	.(((..(((((((((.(((((((&))))))).)))))))))--))).	CGGCCGUGUUCUUCUCGAAUGGG&CCUAUUUCGGAAGAACA--GCCA	0	0	NA	NA	NA	0	0	NA	NA	NA	1	26.8255	4	0.867554	Output/S24h/cleaveLand_result/t_plot/PC-3p-1060_9765_BGI_novel_T007984_1069_TPlot.pdf	0	0	26.8255	2.2374e-12	2.55455e-12	yes	GO:0016021(integral component of membrane);GO:0031224(intrinsic component of membrane);GO:0003824(catalytic activity);GO:0016757(transferase activity, transferring glycosyl groups);GO:0044425(membrane part);GO:0016020(membrane);GO:0016740(transferase activity)	ko00514(Other types of O-glycan biosynthesis)
PC-3p-1060_9765	BGI_novel_T009852	672	692	683	-37	-24.9	0.672973	6.5	1-7,692-686;9-14,684-679;16-21,677-672	8-8,685-685[SIL];15-15,678-678[SIL]	((((((.((((((.(((((((&))))))).)))))).))))))	UGGUUGAUCUUCCAAGGUGGG&CCUAUUUCGGAAGAACAGCCA	0	0	NA	NA	NA	0	0	NA	NA	NA	1	26.8255	4	0.927781	Output/S24h/cleaveLand_result/t_plot/PC-3p-1060_9765_BGI_novel_T009852_683_TPlot.pdf	0	0	26.8255	2.2374e-12	2.55455e-12	yes	GO:0005524(ATP binding);GO:0032559(adenyl ribonucleotide binding);GO:0004672(protein kinase activity);GO:0031224(intrinsic component of membrane);GO:0016020(membrane);GO:0032555(purine ribonucleotide binding);GO:0016301(kinase activity);GO:0000166(nucleotide binding);GO:0016773(phosphotransferase activity, alcohol group as acceptor);GO:0043167(ion binding);GO:0036094(small molecule binding);GO:00…	NA
PC-3p-1060_9765	XM_016080955.2	1075	1094	1085	-37	-25.6	0.691892	6.5	1-3,1094-1092;5-14,1090-1081;16-20,1080-1076	4-4,1091-1091[SIL];15-15,x-x[BULq];21-21,1075-1075[UP3]	.(((((-((((((((((.(((&))).)))))))))).))))).	CGGCUG-UUUUCCGGAGGAGG&CCUAUUUCGGAAGAACAGCCA	1	30.281	4	0.680299	Output/S0h/cleaveLand_result/t_plot/PC-3p-1060_9765_XM_016080955.2_1085_TPlot.pdf	0	0	NA	NA	NA	0	0	NA	NA	NA	30.281	0	0	7.0631e-14	1.09903e-13	yes	GO:0080090(regulation of primary metabolic process);GO:0003700(DNA binding transcription factor activity);GO:0031323(regulation of cellular metabolic process);GO:0019222(regulation of metabolic process);GO:1901363(heterocyclic compound binding);GO:0010556(regulation of macromolecule biosynthetic process);GO:0003677(DNA binding);GO:0050789(regulation of biological process);GO:0006355(regulation of…	ko04626(Plant-pathogen interaction);ko04016(MAPK signaling pathway - plant)
PC-3p-1060_9765	XM_016082100.2	414	442	425	-37	-26.1	0.705405	18.5	1-6,442-437;7-8,429-428;9-21,426-414	x-x,436-430[BULt];x-x,427-427[BULt]	(((((((((((((.((.......((((((&))))))-------))-)))))))))))))	UGGCUGUUUUUCCUGAAUCACUGGAUGGG&CCUAUU-------UC-GGAAGAACAGCCA	1	30.281	4	0.402071	Output/S0h/cleaveLand_result/t_plot/PC-3p-1060_9765_XM_016082100.2_425_TPlot.pdf	0	0	NA	NA	NA	2	53.6509	3	0.05611	Output/S24h/cleaveLand_result/t_plot/PC-3p-1060_9765_XM_016082100.2_425_TPlot.pdf	30.281	0	53.6509	5.8531e-12	6.61749e-12	yes	NA	NA
PC-3p-1060_9765	XM_016086108.2	1274	1294	1284	-37	-24.32	0.657297	11	1-3,1294-1292;7-16,1287-1278;18-20,1277-1275	4-6,1291-1288[AILt];17-17,x-x[BULq];21-21,1274-1274[UP3]	.(((-((((((((((....(((&)))-...)))))))))).))).	CGGC-GUUCUUCCGGCGAGAGG&CCU-AUUUCGGAAGAACAGCCA	0	0	NA	NA	NA	0	0	NA	NA	NA	1	26.8255	4	0.987992	Output/S24h/cleaveLand_result/t_plot/PC-3p-1060_9765_XM_016086108.2_1284_TPlot.pdf	0	0	26.8255	2.2374e-12	2.55455e-12	yes	NA	ko01100(Metabolic pathways);ko00970(Aminoacyl-tRNA biosynthesis);ko03015(mRNA surveillance pathway)
PC-3p-1060_9765	XM_016096293.2	943	968	954	-37	-24.6	0.664865	13	2-7,967-962;8-17,956-947;19-21,945-943	1-1,968-968[UP5];x-x,961-957[BULt];18-18,946-946[SIL]	(((.((((((((((.....((((((.&.))))))-----)))))))))).)))	UGGGUGUUCUUCCGCGGCAAAAUGGA&CCUAUUU-----CGGAAGAACAGCCA	0	0	NA	NA	NA	0	0	NA	NA	NA	1	26.8255	4	0.981549	Output/S24h/cleaveLand_result/t_plot/PC-3p-1060_9765_XM_016096293.2_954_TPlot.pdf	0	0	26.8255	2.2374e-12	2.55455e-12	yes	GO:0031224(intrinsic component of membrane);GO:0016021(integral component of membrane);GO:0044425(membrane part);GO:0016020(membrane)	NA
PC-3p-1060_9765	XM_016101782.2	488	511	501	-37	-25.78	0.696757	7	1-9,511-503;10-13,501-498;16-21,493-488	x-x,502-502[BULt];14-15,497-494[AILt]	((((((....((((.(((((((((&)))))))))-))))--..))))))	UGGCUGGCGGCUUCUUGAAAUAGG&CCUAUUUCG-GAAG--AACAGCCA	7	211.967	2	0.264505	Output/S0h/cleaveLand_result/t_plot/PC-3p-1060_9765_XM_016101782.2_501_TPlot.pdf	0	0	NA	NA	NA	5	134.127	3	0.0955491	Output/S24h/cleaveLand_result/t_plot/PC-3p-1060_9765_XM_016101782.2_501_TPlot.pdf	211.967	0	134.127	5.1993e-44	1.18715e-42	yes	NA	NA
PC-3p-1060_9765	XM_016102850.2	1199	1221	1212	-37	-24.9	0.672973	5.5	2-17,1220-1205;18-20,1202-1200	1-1,1221-1221[UP5];x-x,1204-1203[BULt];21-21,1199-1199[UP3]	.(((..((((((((((((((((.&.))))))))))))))))--))).	AGGCCCUGUUUUUCUGAAAUAGA&CCUAUUUCGGAAGAACA--GCCA	1	30.281	4	0.916422	Output/S0h/cleaveLand_result/t_plot/PC-3p-1060_9765_XM_016102850.2_1212_TPlot.pdf	1	33.3045	4	0.905706	Output/S8h/cleaveLand_result/t_plot/PC-3p-1060_9765_XM_016102850.2_1212_TPlot.pdf	4	107.302	2	0.622673	Output/S24h/cleaveLand_result/t_plot/PC-3p-1060_9765_XM_016102850.2_1212_TPlot.pdf	30.281	33.3045	107.302	3.1015e-15	7.86611e-15	yes	GO:0006807(nitrogen compound metabolic process);GO:0030554(adenyl nucleotide binding);GO:0008152(metabolic process);GO:0016773(phosphotransferase activity, alcohol group as acceptor);GO:0043167(ion binding);GO:0071704(organic substance metabolic process);GO:0032559(adenyl ribonucleotide binding);GO:1901564(organonitrogen compound metabolic process);GO:0044260(cellular macromolecule metabolic proc…	ko03008(Ribosome biogenesis in eukaryotes)
PC-3p-1060_9765	XM_016104164.2	627	648	638	-37	-24.2	0.654054	7	3-8,646-641;9-19,639-629	1-2,648-647[UP5];x-x,640-640[BULt];20-21,628-627[UP3]	..(((((((((((.((((((..&..))))))-)))))))))))..	UCGCUGUUCUUCCAGAAAUACU&CCUAUUUC-GGAAGAACAGCCA	0	0	NA	NA	NA	0	0	NA	NA	NA	1	26.8255	4	0.995845	Output/S24h/cleaveLand_result/t_plot/PC-3p-1060_9765_XM_016104164.2_638_TPlot.pdf	0	0	26.8255	2.2374e-12	2.55455e-12	yes	NA	NA
PC-3p-1060_9765	XM_016109235.2	728	749	740	-37	-24.76	0.669189	11	1-2,749-748;7-11,743-739;12-21,737-728	3-6,747-744[SIL];x-x,738-738[BULt]	((((((((((.(((((....((&))....)))))-))))))))))	UGGCUGUUCUCUCCGGUUUCGG&CCUAUUUCGGA-AGAACAGCCA	0	0	NA	NA	NA	0	0	NA	NA	NA	2	53.6509	2	0.677836	Output/S24h/cleaveLand_result/t_plot/PC-3p-1060_9765_XM_016109235.2_740_TPlot.pdf	0	0	53.6509	5.0035e-24	2.27989e-23	yes	GO:0031224(intrinsic component of membrane);GO:0016020(membrane);GO:0044425(membrane part);GO:0016021(integral component of membrane)	NA
PC-3p-1060_9765	XM_016109283.2	1202	1225	1215	-37	-25.1	0.678378	10	1-3,1225-1223;5-16,1220-1209;18-20,1205-1203	4-4,1222-1221[AILt];17-17,1208-1206[AILt];21-21,1202-1202[UP3]	.(((...((((((((((((..(((&)))-.))))))))))))--.))).	CGGCGACGUUCUUCCGGAGAGAGG&CCU-AUUUCGGAAGAAC--AGCCA	1	30.281	4	0.836538	Output/S0h/cleaveLand_result/t_plot/PC-3p-1060_9765_XM_016109283.2_1215_TPlot.pdf	0	0	NA	NA	NA	0	0	NA	NA	NA	30.281	0	0	7.0631e-14	1.09903e-13	yes	NA	ko03015(mRNA surveillance pathway)
PC-3p-1060_9765	XM_016109435.2	238	264	255	-37	-24.44	0.660541	20	1-3,264-262;5-10,260-255;13-21,246-238	4-4,261-261[SIL];11-12,254-247[AILt]	(((((((((........((((((.(((&))).))))))------..)))))))))	UGGCUGUUCAUGUCCCGCCGAAGGGGG&CCUAUUUCGG------AAGAACAGCCA	0	0	NA	NA	NA	0	0	NA	NA	NA	1	26.8255	4	0.985669	Output/S24h/cleaveLand_result/t_plot/PC-3p-1060_9765_XM_016109435.2_255_TPlot.pdf	0	0	26.8255	2.2374e-12	2.55455e-12	yes	NA	NA
PC-3p-1060_9765	XM_016112562.2	114	137	128	-37	-24.24	0.655135	6	2-15,136-123;17-21,118-114	1-1,137-137[UP5];16-16,122-119[AILt]	(((((....((((((((((((((.&.))))))))))))))---.)))))	UGGCUUCACUUCUUCUGAAAUAGA&CCUAUUUCGGAAGAA---CAGCCA	0	0	NA	NA	NA	1	33.3045	4	0.98696	Output/S8h/cleaveLand_result/t_plot/PC-3p-1060_9765_XM_016112562.2_128_TPlot.pdf	0	0	NA	NA	NA	0	33.3045	0	3.4347e-15	7.86611e-15	yes	GO:0006793(phosphorus metabolic process);GO:0016787(hydrolase activity);GO:0006796(phosphate-containing compound metabolic process);GO:0005488(binding);GO:0005623(cell);GO:0005622(intracellular);GO:0003824(catalytic activity);GO:0009987(cellular process);GO:0016817(hydrolase activity, acting on acid anhydrides);GO:0044237(cellular metabolic process);GO:0044424(intracellular part);GO:0046872(metal…	ko00190(Oxidative phosphorylation)
PC-3p-1060_9765	XM_021129416.1	1110	1129	1120	-37	-25.6	0.691892	6.5	1-3,1129-1127;5-14,1125-1116;16-20,1115-1111	4-4,1126-1126[SIL];15-15,x-x[BULq];21-21,1110-1110[UP3]	.(((((-((((((((((.(((&))).)))))))))).))))).	CGGCUG-UUUUCCGGAGGAGG&CCUAUUUCGGAAGAACAGCCA	1	30.281	4	0.694281	Output/S0h/cleaveLand_result/t_plot/PC-3p-1060_9765_XM_021129416.1_1120_TPlot.pdf	0	0	NA	NA	NA	0	0	NA	NA	NA	30.281	0	0	7.0631e-14	1.09903e-13	yes	GO:0080090(regulation of primary metabolic process);GO:0003700(DNA binding transcription factor activity);GO:0031323(regulation of cellular metabolic process);GO:0019222(regulation of metabolic process);GO:1901363(heterocyclic compound binding);GO:0010556(regulation of macromolecule biosynthetic process);GO:0003677(DNA binding);GO:0050789(regulation of biological process);GO:0006355(regulation of…	ko04626(Plant-pathogen interaction);ko04016(MAPK signaling pathway - plant)
PC-3p-1060_9765	XM_021132478.1	423	445	434	-37	-24.9	0.672973	10	1-5,445-441;6-9,439-436;11-20,433-424	x-x,440-440[BULt];10-10,435-434[AILt];21-21,423-423[UP3]	.((((((((((..((((.(((((&)))))-))))-.)))))))))).	AGGCUGUUCUUGAUGAAUGUGGG&CCUAU-UUCG-GAAGAACAGCCA	0	0	NA	NA	NA	1	33.3045	4	0.895124	Output/S8h/cleaveLand_result/t_plot/PC-3p-1060_9765_XM_021132478.1_434_TPlot.pdf	0	0	NA	NA	NA	0	33.3045	0	3.4347e-15	7.86611e-15	yes	NA	NA
PC-3p-1060_9765	XM_021139953.1	460	484	474	-37	-24.3	0.656757	7	1-2,484-483;3-15,481-469;16-16,467-467;17-20,464-461	x-x,482-482[BULt];x-x,468-468[BULt];x-x,466-465[BULt];21-21,460-460[UP3]	.((((..(.(((((((((((((.((&))-)))))))))))))-)--)))).	AGGCUCCGCUUCUUCCGAAAUGUGG&CC-UAUUUCGGAAGAA-C--AGCCA	0	0	NA	NA	NA	0	0	NA	NA	NA	1	26.8255	4	0.988869	Output/S24h/cleaveLand_result/t_plot/PC-3p-1060_9765_XM_021139953.1_474_TPlot.pdf	0	0	26.8255	2.2374e-12	2.55455e-12	yes	NA	ko03050(Proteasome)
PC-3p-1060_9765	XM_021142435.1	239	265	256	-37	-24.44	0.660541	20	1-3,265-263;5-10,261-256;13-21,247-239	4-4,262-262[SIL];11-12,255-248[AILt]	(((((((((........((((((.(((&))).))))))------..)))))))))	UGGCUGUUCAUGUCCCGCCGAAGGGGG&CCUAUUUCGG------AAGAACAGCCA	1	30.281	4	0.977151	Output/S0h/cleaveLand_result/t_plot/PC-3p-1060_9765_XM_021142435.1_256_TPlot.pdf	0	0	NA	NA	NA	1	26.8255	4	0.986027	Output/S24h/cleaveLand_result/t_plot/PC-3p-1060_9765_XM_021142435.1_256_TPlot.pdf	30.281	0	26.8255	5.3891e-07	5.57092e-07	yes	NA	NA
PC-3p-107728_73	XM_016082671.2	615	636	629	-47.1	-30.8	0.653928	12.5	4-7,633-630;10-23,629-616	1-3,636-634[UP5];8-9,x-x[BULq];24-24,615-615[UP3]	.((((((((((((((--((((...&...))))..)))))))))))))).	GUCGGGUGCAGCGGC--CGUGGUU&UCACAUGAAGUCGCUGCACCUGAG	0	0	NA	NA	NA	0	0	NA	NA	NA	2	53.6509	2	0.517506	Output/S24h/cleaveLand_result/t_plot/PC-3p-107728_73_XM_016082671.2_629_TPlot.pdf	0	0	53.6509	5.0035e-24	2.27989e-23	yes	GO:0016829(lyase activity);GO:0016836(hydro-lyase activity);GO:0008152(metabolic process);GO:0016835(carbon-oxygen lyase activity);GO:0003824(catalytic activity)	ko01110(Biosynthesis of secondary metabolites);ko01210(2-Oxocarboxylic acid metabolism);ko01100(Metabolic pathways);ko01230(Biosynthesis of amino acids);ko00660(C5-Branched dibasic acid metabolism);ko00290(Valine, leucine and isoleucine biosynthesis)
PC-3p-107728_73	XM_016082672.2	616	637	630	-47.1	-30.8	0.653928	12.5	4-7,634-631;10-23,630-617	1-3,637-635[UP5];8-9,x-x[BULq];24-24,616-616[UP3]	.((((((((((((((--((((...&...))))..)))))))))))))).	GUCGGGUGCAGCGGC--CGUGGUU&UCACAUGAAGUCGCUGCACCUGAG	0	0	NA	NA	NA	1	33.3045	4	0.84943	Output/S8h/cleaveLand_result/t_plot/PC-3p-107728_73_XM_016082672.2_630_TPlot.pdf	0	0	NA	NA	NA	0	33.3045	0	3.4347e-15	7.86611e-15	yes	GO:0016829(lyase activity);GO:0016836(hydro-lyase activity);GO:0008152(metabolic process);GO:0016835(carbon-oxygen lyase activity);GO:0003824(catalytic activity)	ko01110(Biosynthesis of secondary metabolites);ko01210(2-Oxocarboxylic acid metabolism);ko01100(Metabolic pathways);ko01230(Biosynthesis of amino acids);ko00660(C5-Branched dibasic acid metabolism);ko00290(Valine, leucine and isoleucine biosynthesis)
PC-3p-107728_73	XM_021132348.1	622	643	636	-47.1	-30.8	0.653928	12.5	4-7,640-637;10-23,636-623	1-3,643-641[UP5];8-9,x-x[BULq];24-24,622-622[UP3]	.((((((((((((((--((((...&...))))..)))))))))))))).	GUCGGGUGCAGCGGC--CGUGGUU&UCACAUGAAGUCGCUGCACCUGAG	1	30.281	4	0.840152	Output/S0h/cleaveLand_result/t_plot/PC-3p-107728_73_XM_021132348.1_636_TPlot.pdf	0	0	NA	NA	NA	0	0	NA	NA	NA	30.281	0	0	7.0631e-14	1.09903e-13	yes	GO:0016829(lyase activity);GO:0016836(hydro-lyase activity);GO:0008152(metabolic process);GO:0016835(carbon-oxygen lyase activity);GO:0003824(catalytic activity)	ko01110(Biosynthesis of secondary metabolites);ko01210(2-Oxocarboxylic acid metabolism);ko01100(Metabolic pathways);ko01230(Biosynthesis of amino acids);ko00660(C5-Branched dibasic acid metabolism);ko00290(Valine, leucine and isoleucine biosynthesis)
PC-3p-107728_73	XM_021132349.1	622	643	636	-47.1	-30.8	0.653928	12.5	4-7,640-637;10-23,636-623	1-3,643-641[UP5];8-9,x-x[BULq];24-24,622-622[UP3]	.((((((((((((((--((((...&...))))..)))))))))))))).	GUCGGGUGCAGCGGC--CGUGGUU&UCACAUGAAGUCGCUGCACCUGAG	0	0	NA	NA	NA	0	0	NA	NA	NA	1	26.8255	4	0.891797	Output/S24h/cleaveLand_result/t_plot/PC-3p-107728_73_XM_021132349.1_636_TPlot.pdf	0	0	26.8255	2.2374e-12	2.55455e-12	yes	GO:0016829(lyase activity);GO:0016836(hydro-lyase activity);GO:0008152(metabolic process);GO:0016835(carbon-oxygen lyase activity);GO:0003824(catalytic activity)	ko01110(Biosynthesis of secondary metabolites);ko01210(2-Oxocarboxylic acid metabolism);ko01100(Metabolic pathways);ko01230(Biosynthesis of amino acids);ko00660(C5-Branched dibasic acid metabolism);ko00290(Valine, leucine and isoleucine biosynthesis)
PC-3p-108384_72	XM_016082671.2	611	634	626	-45.2	-33.7	0.745575	9	2-9,633-626;11-20,625-616;21-22,614-613	1-1,634-634[UP5];10-10,x-x[BULq];x-x,615-615[BULt];23-24,612-611[UP3]	..((.((((((((((-((((((((.&.)))))))).))))))))))-))..	GCGCGUCGGGUGCAG-CGGCCGUGG&ACAUGGUCGACUGCACCUGA-GUUU	0	0	NA	NA	NA	1	33.3045	4	0.332485	Output/S8h/cleaveLand_result/t_plot/PC-3p-108384_72_XM_016082671.2_626_TPlot.pdf	0	0	NA	NA	NA	0	33.3045	0	3.4347e-15	7.86611e-15	yes	GO:0016829(lyase activity);GO:0016836(hydro-lyase activity);GO:0008152(metabolic process);GO:0016835(carbon-oxygen lyase activity);GO:0003824(catalytic activity)	ko01110(Biosynthesis of secondary metabolites);ko01210(2-Oxocarboxylic acid metabolism);ko01100(Metabolic pathways);ko01230(Biosynthesis of amino acids);ko00660(C5-Branched dibasic acid metabolism);ko00290(Valine, leucine and isoleucine biosynthesis)
PC-3p-108384_72	XM_016082917.2	1369	1393	1384	-45.2	-31.6	0.699115	8	2-10,1392-1384;11-19,1382-1374;21-22,1372-1371	1-1,1393-1393[UP5];x-x,1383-1383[BULt];20-20,1373-1373[SIL];23-24,1370-1369[UP3]	..((.(((((((((.(((((((((.&.)))))))))-))))))))).))..	UUACACAGGUGCAGCUUGACCGUGC&ACAUGGUCGA-CUGCACCUGAGUUU	1	30.281	4	0.521876	Output/S0h/cleaveLand_result/t_plot/PC-3p-108384_72_XM_016082917.2_1384_TPlot.pdf	0	0	NA	NA	NA	0	0	NA	NA	NA	30.281	0	0	7.0631e-14	1.09903e-13	yes	GO:0008152(metabolic process);GO:0031966(mitochondrial membrane);GO:0044429(mitochondrial part);GO:0044260(cellular macromolecule metabolic process);GO:0044464(cell part);GO:0071704(organic substance metabolic process);GO:0015833(peptide transport);GO:0005488(binding);GO:0006627(protein processing involved in protein targeting to mitochondrion);GO:0007005(mitochondrion organization);GO:0046907(in…	NA
PC-3p-108384_72	XM_016084492.2	616	639	630	-45.2	-31.4	0.69469	12.5	5-21,635-619	1-4,639-636[UP5];22-24,618-616[UP3]	...(((((((((((((((((....&....)))))))))))))))))...	AGUUUCAGGUGCAGUUGGCCCUAG&ACAUGGUCGACUGCACCUGAGUUU	0	0	NA	NA	NA	1	33.3045	4	0.535057	Output/S8h/cleaveLand_result/t_plot/PC-3p-108384_72_XM_016084492.2_630_TPlot.pdf	0	0	NA	NA	NA	0	33.3045	0	3.4347e-15	7.86611e-15	yes	GO:0009968(negative regulation of signal transduction);GO:0051704(multi-organism process);GO:0008152(metabolic process);GO:0044238(primary metabolic process);GO:0002239(response to oomycetes);GO:0043167(ion binding);GO:0030135(coated vesicle);GO:0023051(regulation of signaling);GO:0005737(cytoplasm);GO:0044464(cell part);GO:0051173(positive regulation of nitrogen compound metabolic process);GO:00…	NA
PC-3p-108384_72	XM_016107115.2	13567	13590	13581	-45.2	-32.1	0.710177	6	1-10,13590-13581;12-18,13579-13573;20-24,13571-13567	11-11,13580-13580[SIL];19-19,13572-13572[SIL]	(((((.(((((((.((((((((((&)))))))))).))))))).)))))	GGAUUGGGGUGCAUUUGACCAUGU&ACAUGGUCGACUGCACCUGAGUUU	1	30.281	4	0.453228	Output/S0h/cleaveLand_result/t_plot/PC-3p-108384_72_XM_016107115.2_13581_TPlot.pdf	0	0	NA	NA	NA	0	0	NA	NA	NA	30.281	0	0	7.0631e-14	1.09903e-13	yes	GO:0051234(establishment of localization);GO:0010101(post-embryonic root morphogenesis);GO:0048528(post-embryonic root development);GO:0050896(response to stimulus);GO:0009987(cellular process);GO:0005829(cytosol);GO:0009914(hormone transport);GO:0044424(intracellular part);GO:0051704(multi-organism process);GO:0016020(membrane);GO:0043169(cation binding);GO:0044444(cytoplasmic part);GO:0030054(c…	NA
PC-3p-108384_72	XM_021132348.1	618	641	633	-45.2	-33.7	0.745575	9	2-9,640-633;11-20,632-623;21-22,621-620	1-1,641-641[UP5];10-10,x-x[BULq];x-x,622-622[BULt];23-24,619-618[UP3]	..((.((((((((((-((((((((.&.)))))))).))))))))))-))..	GCGCGUCGGGUGCAG-CGGCCGUGG&ACAUGGUCGACUGCACCUGA-GUUU	0	0	NA	NA	NA	0	0	NA	NA	NA	1	26.8255	4	0.396733	Output/S24h/cleaveLand_result/t_plot/PC-3p-108384_72_XM_021132348.1_633_TPlot.pdf	0	0	26.8255	2.2374e-12	2.55455e-12	yes	GO:0016829(lyase activity);GO:0016836(hydro-lyase activity);GO:0008152(metabolic process);GO:0016835(carbon-oxygen lyase activity);GO:0003824(catalytic activity)	ko01110(Biosynthesis of secondary metabolites);ko01210(2-Oxocarboxylic acid metabolism);ko01100(Metabolic pathways);ko01230(Biosynthesis of amino acids);ko00660(C5-Branched dibasic acid metabolism);ko00290(Valine, leucine and isoleucine biosynthesis)
PC-3p-110122_70	BGI_novel_T001367	1556	1582	1573	-32.1	-24.8	0.772586	13.5	2-10,1581-1573;11-22,1567-1556	1-1,1582-1582[UP5];x-x,1572-1568[BULt]	((((((((((((.....(((((((((.&.)))))))))-----))))))))))))	AGGCAAAGUUGAGGGCUCAAGGAUCCC&AGGAUUCUUG-----UUAACUUUGCUU	0	0	NA	NA	NA	0	0	NA	NA	NA	1	26.8255	4	0.671057	Output/S24h/cleaveLand_result/t_plot/PC-3p-110122_70_BGI_novel_T001367_1573_TPlot.pdf	0	0	26.8255	2.2374e-12	2.55455e-12	yes	NA	ko03015(mRNA surveillance pathway)
PC-3p-110122_70	BGI_novel_T001630	6961	6984	6975	-32.1	-21.2	0.660436	9.5	1-12,6984-6973;13-15,6969-6967;18-22,6965-6961	x-x,6972-6970[BULt];16-17,6966-6966[AILq]	(((((.-(((...((((((((((((&))))))))))))---)))..)))))	AGGCAU-GUUUGGAACAAGGAUCCU&AGGAUUCUUGUU---AACUUUGCUU	0	0	NA	NA	NA	0	0	NA	NA	NA	1	26.8255	4	1	Output/S24h/cleaveLand_result/t_plot/PC-3p-110122_70_BGI_novel_T001630_6975_TPlot.pdf	0	0	26.8255	2.2374e-12	2.55455e-12	yes	NA	ko04626(Plant-pathogen interaction)
PC-3p-110122_70	BGI_novel_T002762	1761	1783	1774	-32.1	-22.4	0.697819	7.5	2-15,1782-1769;17-20,1766-1763	1-1,1783-1783[UP5];16-16,1768-1767[AILt];21-22,1762-1761[UP3]	..((((..((((((((((((((.&.))))))))))))))-.))))..	CUGCAGCUGUUAACAGGAAUCUC&AGGAUUCUUGUUAAC-UUUGCUU	1	30.281	4	0.99975	Output/S0h/cleaveLand_result/t_plot/PC-3p-110122_70_BGI_novel_T002762_1774_TPlot.pdf	0	0	NA	NA	NA	0	0	NA	NA	NA	30.281	0	0	7.0631e-14	1.09903e-13	yes	GO:0097159(organic cyclic compound binding);GO:0003677(DNA binding);GO:0003676(nucleic acid binding);GO:0005488(binding);GO:1901363(heterocyclic compound binding)	NA
PC-3p-110122_70	BGI_novel_T002921	322	348	334	-32.1	-21.1	0.657321	16	1-5,348-344;6-8,342-340;9-20,335-324	x-x,343-343[BULt];x-x,339-336[BULt];21-22,323-322[UP3]	..((((((((((((....(((.(((((&)))))-)))----))))))))))))..	GCGCAAAGUUGGCGAAUGGGAGAUCCU&AGGAU-UCU----UGUUAACUUUGCUU	0	0	NA	NA	NA	0	0	NA	NA	NA	1	26.8255	4	1	Output/S24h/cleaveLand_result/t_plot/PC-3p-110122_70_BGI_novel_T002921_334_TPlot.pdf	0	0	26.8255	2.2374e-12	2.55455e-12	yes	GO:0033554(cellular response to stress);GO:0003756(protein disulfide isomerase activity);GO:0005783(endoplasmic reticulum);GO:0050896(response to stimulus);GO:0005623(cell);GO:0009987(cellular process);GO:0044424(intracellular part);GO:0016853(isomerase activity);GO:0043227(membrane-bounded organelle);GO:0043226(organelle);GO:0003824(catalytic activity);GO:0044444(cytoplasmic part);GO:0016864(int…	ko04070(Phosphatidylinositol signaling system);ko01100(Metabolic pathways);ko00562(Inositol phosphate metabolism)
PC-3p-110122_70	BGI_novel_T003031	1596	1621	1612	-32.1	-21.16	0.65919	13.5	2-12,1620-1610;15-22,1603-1596	1-1,1621-1621[UP5];13-14,1609-1604[AILt]	((((((((......(((((((((((.&.)))))))))))----..))))))))	AAGCAGAGAGGGUGAGCAAGAAUUCA&AGGAUUCUUGUU----AACUUUGCUU	0	0	NA	NA	NA	1	33.3045	4	1	Output/S8h/cleaveLand_result/t_plot/PC-3p-110122_70_BGI_novel_T003031_1612_TPlot.pdf	0	0	NA	NA	NA	0	33.3045	0	3.4347e-15	7.86611e-15	yes	NA	ko03013(RNA transport)
PC-3p-110122_70	BGI_novel_T003033	1596	1621	1612	-32.1	-21.16	0.65919	13.5	2-12,1620-1610;15-22,1603-1596	1-1,1621-1621[UP5];13-14,1609-1604[AILt]	((((((((......(((((((((((.&.)))))))))))----..))))))))	AAGCAGAGAGGGUGAGCAAGAAUUCA&AGGAUUCUUGUU----AACUUUGCUU	1	30.281	4	1	Output/S0h/cleaveLand_result/t_plot/PC-3p-110122_70_BGI_novel_T003033_1612_TPlot.pdf	0	0	NA	NA	NA	0	0	NA	NA	NA	30.281	0	0	7.0631e-14	1.09903e-13	yes	NA	ko03013(RNA transport)
PC-3p-110122_70	BGI_novel_T004296	851	872	864	-32.1	-21.4	0.666667	5.5	2-8,871-865;10-18,864-856;19-22,854-851	1-1,872-872[UP5];9-9,x-x[BULq];x-x,855-855[BULt]	((((.(((((((((-(((((((.&.))))))).)))))))))-))))	AAGCUGAAGUUAAC-AGAAUCUC&AGGAUUCUUGUUAACUUU-GCUU	2	60.562	2	0.998043	Output/S0h/cleaveLand_result/t_plot/PC-3p-110122_70_BGI_novel_T004296_864_TPlot.pdf	0	0	NA	NA	NA	0	0	NA	NA	NA	60.562	0	0	4.9856e-27	3.03728e-26	yes	GO:0005515(protein binding);GO:0008092(cytoskeletal protein binding);GO:0071840(cellular component organization or biogenesis);GO:0009987(cellular process);GO:0015631(tubulin binding);GO:0008017(microtubule binding);GO:0005488(binding);GO:0016043(cellular component organization);GO:0007010(cytoskeleton organization);GO:0006996(organelle organization)	ko03013(RNA transport)
PC-3p-110122_70	BGI_novel_T005841	618	640	630	-32.1	-22.3	0.694704	9.5	2-2,639-639;5-22,635-618	1-1,640-640[UP5];3-4,638-636[AILt]	((((((((((((((((((...(.&.)-..))))))))))))))))))	GAGUGAAGUUGACAAGAAGCACA&AG-GAUUCUUGUUAACUUUGCUU	1	30.281	4	0.999922	Output/S0h/cleaveLand_result/t_plot/PC-3p-110122_70_BGI_novel_T005841_630_TPlot.pdf	1	33.3045	4	0.999876	Output/S8h/cleaveLand_result/t_plot/PC-3p-110122_70_BGI_novel_T005841_630_TPlot.pdf	0	0	NA	NA	NA	30.281	33.3045	0	1.1203e-07	1.21623e-07	yes	GO:0043933(macromolecular complex subunit organization);GO:0044464(cell part);GO:0006461(protein complex assembly);GO:0022607(cellular component assembly);GO:0009987(cellular process);GO:0005829(cytosol);GO:0071840(cellular component organization or biogenesis);GO:0044424(intracellular part);GO:0005622(intracellular);GO:0044085(cellular component biogenesis);GO:0034622(cellular macromolecular com…	NA
PC-3p-110122_70	BGI_novel_T006249	1130	1151	1142	-32.1	-22.1	0.688474	5	1-2,1151-1150;4-12,1148-1140;14-22,1138-1130	3-3,1149-1149[SIL];13-13,1139-1139[SIL]	(((((((((.(((((((((.((&)).))))))))).)))))))))	AAGUGAAGUGAACAAGAGUGCU&AGGAUUCUUGUUAACUUUGCUU	0	0	NA	NA	NA	0	0	NA	NA	NA	1	26.8255	4	0.999991	Output/S24h/cleaveLand_result/t_plot/PC-3p-110122_70_BGI_novel_T006249_1142_TPlot.pdf	0	0	26.8255	2.2374e-12	2.55455e-12	yes	GO:0044424(intracellular part);GO:0000003(reproduction);GO:0035825(homologous recombination);GO:0006139(nucleobase-containing compound metabolic process);GO:0071704(organic substance metabolic process);GO:0051304(chromosome separation);GO:0033554(cellular response to stress);GO:0050896(response to stimulus);GO:0044464(cell part);GO:0097159(organic cyclic compound binding);GO:0006996(organelle org…	ko03420(Nucleotide excision repair)
PC-3p-110122_70	BGI_novel_T006292	2092	2114	2105	-32.1	-21.4	0.666667	7.5	2-9,2113-2106;11-18,2104-2097;19-20,2095-2094	1-1,2114-2114[UP5];10-10,2105-2105[SIL];x-x,2096-2096[BULt];21-22,2093-2092[UP3]	..((.((((((((.((((((((.&.)))))))).))))))))-))..	AUGUGAAAGUUGAGAAGAAUCCA&AGGAUUCUUGUUAACUUU-GCUU	0	0	NA	NA	NA	0	0	NA	NA	NA	1	26.8255	4	1	Output/S24h/cleaveLand_result/t_plot/PC-3p-110122_70_BGI_novel_T006292_2105_TPlot.pdf	0	0	26.8255	2.2374e-12	2.55455e-12	yes	GO:0043226(organelle);GO:0044464(cell part);GO:0016853(isomerase activity);GO:0044260(cellular macromolecule metabolic process);GO:0008152(metabolic process);GO:0018193(peptidyl-amino acid modification);GO:0000209(protein polyubiquitination);GO:0016740(transferase activity);GO:0006807(nitrogen compound metabolic process);GO:0043170(macromolecule metabolic process);GO:0043412(macromolecule modific…	ko04120(Ubiquitin mediated proteolysis)
PC-3p-110122_70	BGI_novel_T006841	800	821	812	-32.1	-22.48	0.700312	9	2-15,820-807;19-21,803-801	1-1,821-821[UP5];16-18,806-804[SIL];22-22,800-800[UP3]	.(((...((((((((((((((.&.))))))))))))))...))).	UGGUUAUGUUGGCAAGAGUCCA&AGGAUUCUUGUUAACUUUGCUU	0	0	NA	NA	NA	0	0	NA	NA	NA	1	26.8255	4	0.999894	Output/S24h/cleaveLand_result/t_plot/PC-3p-110122_70_BGI_novel_T006841_812_TPlot.pdf	0	0	26.8255	2.2374e-12	2.55455e-12	yes	GO:0016020(membrane);GO:0031224(intrinsic component of membrane);GO:0044425(membrane part);GO:0016021(integral component of membrane)	NA
PC-3p-110122_70	BGI_novel_T007586	375	399	390	-32.1	-21.28	0.662928	14.5	2-10,398-390;15-22,382-375	1-1,399-399[UP5];11-14,389-383[AILt]	((((((((.......(((((((((.&.)))))))))---....))))))))	AAGCGAAGGAGCCACCGAGAAUCCA&AGGAUUCUUG---UUAACUUUGCUU	0	0	NA	NA	NA	0	0	NA	NA	NA	3	80.4764	2	0.999711	Output/S24h/cleaveLand_result/t_plot/PC-3p-110122_70_BGI_novel_T007586_390_TPlot.pdf	0	0	80.4764	1.1184e-35	1.47636e-34	yes	GO:0016787(hydrolase activity);GO:0048856(anatomical structure development);GO:0006298(mismatch repair);GO:0043233(organelle lumen);GO:0000793(condensed chromosome);GO:0033554(cellular response to stress);GO:0006950(response to stress);GO:0048229(gametophyte development);GO:0043227(membrane-bounded organelle);GO:0006310(DNA recombination);GO:0016887(ATPase activity);GO:0016817(hydrolase activity,…	ko03430(Mismatch repair)
PC-3p-110122_70	BGI_novel_T010583	398	418	410	-32.1	-21.3	0.663551	9	2-3,417-416;5-11,415-409;13-21,407-399	1-1,418-418[UP5];4-4,x-x[BULq];12-12,408-408[SIL];22-22,398-398[UP3]	.(((((((((.(((((((-((.&.)).))))))).))))))))).	UGGCAAGGUUUACAAGGG-CCA&AGGAUUCUUGUUAACUUUGCUU	1	30.281	4	1	Output/S0h/cleaveLand_result/t_plot/PC-3p-110122_70_BGI_novel_T010583_410_TPlot.pdf	1	33.3045	4	1	Output/S8h/cleaveLand_result/t_plot/PC-3p-110122_70_BGI_novel_T010583_410_TPlot.pdf	0	0	NA	NA	NA	30.281	33.3045	0	1.1203e-07	1.21623e-07	yes	GO:0006468(protein phosphorylation);GO:0032553(ribonucleotide binding);GO:0009987(cellular process);GO:0097159(organic cyclic compound binding);GO:0043167(ion binding);GO:0019538(protein metabolic process);GO:0018193(peptidyl-amino acid modification);GO:0043168(anion binding);GO:0000166(nucleotide binding);GO:0032555(purine ribonucleotide binding);GO:0016772(transferase activity, transferring pho…	NA
PC-3p-110122_70	BGI_novel_T010933	542	564	555	-32.1	-21.8	0.679128	7	2-3,563-562;5-13,560-552;14-20,550-544	1-1,564-564[UP5];4-4,561-561[SIL];x-x,551-551[BULt];21-22,543-542[UP3]	..(((((((.(((((((((.((.&.)).)))))))))-)))))))..	UCGCGAGGUAUAACAAGAAACCA&AGGAUUCUUGUUA-ACUUUGCUU	0	0	NA	NA	NA	0	0	NA	NA	NA	1	26.8255	4	1	Output/S24h/cleaveLand_result/t_plot/PC-3p-110122_70_BGI_novel_T010933_555_TPlot.pdf	0	0	26.8255	2.2374e-12	2.55455e-12	yes	GO:0043231(intracellular membrane-bounded organelle);GO:0046983(protein dimerization activity);GO:0043227(membrane-bounded organelle);GO:0005623(cell);GO:0097159(organic cyclic compound binding);GO:0032993(protein-DNA complex);GO:0046982(protein heterodimerization activity);GO:0044446(intracellular organelle part);GO:0005634(nucleus);GO:0003676(nucleic acid binding);GO:0044422(organelle part);GO:…	NA
PC-3p-110122_70	BGI_novel_T011252	1359	1379	1371	-32.1	-22.8	0.71028	10.5	2-8,1378-1372;11-21,1370-1360	1-1,1379-1379[UP5];9-10,1371-1371[AILq];22-22,1359-1359[UP3]	.(((((((((((.-(((((((.&.)))))))..))))))))))).	UGGCGAGGUUGAG-GGAGUCCC&AGGAUUCUUGUUAACUUUGCUU	0	0	NA	NA	NA	1	33.3045	4	0.997059	Output/S8h/cleaveLand_result/t_plot/PC-3p-110122_70_BGI_novel_T011252_1371_TPlot.pdf	0	0	NA	NA	NA	0	33.3045	0	3.4347e-15	7.86611e-15	yes	GO:0003677(DNA binding);GO:0009987(cellular process);GO:0051301(cell division);GO:0097159(organic cyclic compound binding);GO:0003676(nucleic acid binding);GO:1901363(heterocyclic compound binding);GO:0005488(binding)	ko03040(Spliceosome)
PC-3p-110122_70	BGI_novel_T012198	2484	2505	2495	-32.1	-20.9	0.65109	7.5	2-6,2504-2500;7-16,2498-2489;19-22,2487-2484	1-1,2505-2505[UP5];x-x,2499-2499[BULt];17-18,2488-2488[AILq]	((((.-((((((((((.(((((.&.)))))-))))))))))..))))	GAGCU-AGUUGACAAGAAAUCUA&AGGAUU-CUUGUUAACUUUGCUU	0	0	NA	NA	NA	1	33.3045	4	1	Output/S8h/cleaveLand_result/t_plot/PC-3p-110122_70_BGI_novel_T012198_2495_TPlot.pdf	0	0	NA	NA	NA	0	33.3045	0	3.4347e-15	7.86611e-15	yes	GO:0044257(cellular protein catabolic process);GO:0019538(protein metabolic process);GO:0044267(cellular protein metabolic process);GO:0043412(macromolecule modification);GO:0019783(ubiquitin-like protein-specific protease activity);GO:0101005(ubiquitinyl hydrolase activity);GO:0036211(protein modification process);GO:0006511(ubiquitin-dependent protein catabolic process);GO:0044237(cellular meta…	NA
PC-3p-110122_70	BGI_novel_T012512	1587	1609	1600	-32.1	-23.2	0.722741	4.5	1-14,1609-1596;15-22,1594-1587	x-x,1595-1595[BULt]	((((((((.((((((((((((((&))))))))))))))-))))))))	AAGCAAGGAUUAACAAGGAUUUU&AGGAUUCUUGUUAA-CUUUGCUU	1	30.281	4	0.987507	Output/S0h/cleaveLand_result/t_plot/PC-3p-110122_70_BGI_novel_T012512_1600_TPlot.pdf	0	0	NA	NA	NA	1	26.8255	4	0.992937	Output/S24h/cleaveLand_result/t_plot/PC-3p-110122_70_BGI_novel_T012512_1600_TPlot.pdf	30.281	0	26.8255	5.3891e-07	5.57092e-07	yes	GO:0006518(peptide metabolic process);GO:0016875(ligase activity, forming carbon-oxygen bonds);GO:0043043(peptide biosynthetic process);GO:0036094(small molecule binding);GO:0044249(cellular biosynthetic process);GO:0043168(anion binding);GO:0009058(biosynthetic process);GO:0043038(amino acid activation);GO:0044281(small molecule metabolic process);GO:1901576(organic substance biosynthetic proces…	ko00970(Aminoacyl-tRNA biosynthesis)
PC-3p-110122_70	BGI_novel_T012562	322	343	334	-32.1	-21.3	0.663551	10	1-3,343-341;6-7,338-337;9-12,335-332;15-22,329-322	4-5,340-339[SIL];8-8,336-336[SIL];13-14,331-330[SIL]	((((((((..((((.((..(((&)))..)).))))..))))))))	GAGCAGAGGGAACGCGAUGCCU&AGGAUUCUUGUUAACUUUGCUU	1	30.281	4	1	Output/S0h/cleaveLand_result/t_plot/PC-3p-110122_70_BGI_novel_T012562_334_TPlot.pdf	0	0	NA	NA	NA	0	0	NA	NA	NA	30.281	0	0	7.0631e-14	1.09903e-13	yes	GO:0000166(nucleotide binding);GO:0097159(organic cyclic compound binding);GO:0044464(cell part);GO:0044444(cytoplasmic part);GO:1901265(nucleoside phosphate binding);GO:0005488(binding);GO:0005737(cytoplasm);GO:0044424(intracellular part);GO:0003676(nucleic acid binding);GO:1901363(heterocyclic compound binding);GO:0005829(cytosol);GO:0036094(small molecule binding);GO:0005622(intracellular);GO:…	NA
PC-3p-110122_70	BGI_novel_T013047	767	788	779	-32.1	-21.3	0.663551	6	2-3,787-786;5-14,784-775;16-22,773-767	1-1,788-788[UP5];4-4,785-785[SIL];15-15,774-774[SIL]	(((((((.((((((((((.((.&.)).)))))))))).)))))))	AAGCGAGAUUGACAAGAAGCCA&AGGAUUCUUGUUAACUUUGCUU	0	0	NA	NA	NA	1	33.3045	4	1	Output/S8h/cleaveLand_result/t_plot/PC-3p-110122_70_BGI_novel_T013047_779_TPlot.pdf	0	0	NA	NA	NA	0	33.3045	0	3.4347e-15	7.86611e-15	yes	GO:0008380(RNA splicing);GO:0044464(cell part);GO:0044424(intracellular part);GO:1901360(organic cyclic compound metabolic process);GO:0006725(cellular aromatic compound metabolic process);GO:0044238(primary metabolic process);GO:0044260(cellular macromolecule metabolic process);GO:0043227(membrane-bounded organelle);GO:0071704(organic substance metabolic process);GO:0005622(intracellular);GO:000…	NA
PC-3p-110122_70	XM_016076141.2	786	808	798	-32.1	-21.7	0.676012	11.5	2-4,807-805;6-20,802-788	1-1,808-808[UP5];5-5,804-803[AILt];21-22,787-786[UP3]	..(((((((((((((((..(((.&.)))-.)))))))))))))))..	AUGCAGAGUUGACAGGGCUUUCG&AGGA-UUCUUGUUAACUUUGCUU	1	30.281	4	0.999999	Output/S0h/cleaveLand_result/t_plot/PC-3p-110122_70_XM_016076141.2_798_TPlot.pdf	0	0	NA	NA	NA	0	0	NA	NA	NA	30.281	0	0	7.0631e-14	1.09903e-13	yes	GO:0016787(hydrolase activity);GO:0003824(catalytic activity)	NA
PC-3p-110122_70	XM_016078215.2	1675	1702	1693	-32.1	-21.3	0.663551	9.5	2-12,1701-1691;14-16,1689-1687;17-22,1680-1675	1-1,1702-1702[UP5];13-13,1690-1690[SIL];x-x,1686-1681[BULt]	((((((......(((.(((((((((((.&.))))))))))).)))------))))))	AAGCAAGAAAACGGUAAACAAGGAUCCC&AGGAUUCUUGUUAACU------UUGCUU	1	30.281	4	1	Output/S0h/cleaveLand_result/t_plot/PC-3p-110122_70_XM_016078215.2_1693_TPlot.pdf	0	0	NA	NA	NA	0	0	NA	NA	NA	30.281	0	0	7.0631e-14	1.09903e-13	yes	GO:0043229(intracellular organelle);GO:0090304(nucleic acid metabolic process);GO:0034645(cellular macromolecule biosynthetic process);GO:0006259(DNA metabolic process);GO:0044249(cellular biosynthetic process);GO:0009059(macromolecule biosynthetic process);GO:0005623(cell);GO:0071704(organic substance metabolic process);GO:1901360(organic cyclic compound metabolic process);GO:0006139(nucleobase-…	ko03410(Base excision repair);ko00240(Pyrimidine metabolism);ko03030(DNA replication);ko03430(Mismatch repair);ko01100(Metabolic pathways);ko03440(Homologous recombination);ko03420(Nucleotide excision repair);ko00230(Purine metabolism)
PC-3p-110122_70	XM_016078791.2	835	858	849	-32.1	-22.4	0.697819	8	2-10,857-849;11-12,846-845;15-22,842-835	1-1,858-858[UP5];x-x,848-847[BULt];13-14,844-843[SIL]	((((((((..((..(((((((((.&.)))))))))--))..))))))))	AAGCAAAGGCAAACCAGGAAUCCA&AGGAUUCUUG--UUAACUUUGCUU	0	0	NA	NA	NA	1	33.3045	4	0.999678	Output/S8h/cleaveLand_result/t_plot/PC-3p-110122_70_XM_016078791.2_849_TPlot.pdf	0	0	NA	NA	NA	0	33.3045	0	3.4347e-15	7.86611e-15	yes	GO:0016746(transferase activity, transferring acyl groups);GO:0016740(transferase activity);GO:0003824(catalytic activity);GO:0016747(transferase activity, transferring acyl groups other than amino-acyl groups)	NA
PC-3p-110122_70	XM_016079227.2	1805	1825	1817	-32.1	-21.2	0.660436	10	2-3,1824-1823;5-9,1822-1818;11-22,1816-1805	1-1,1825-1825[UP5];4-4,x-x[BULq];10-10,1817-1817[SIL]	((((((((((((.(((((-((.&.)).))))).))))))))))))	AGGCAAGGUUGAGGAGAG-CUG&AGGAUUCUUGUUAACUUUGCUU	1	30.281	4	1	Output/S0h/cleaveLand_result/t_plot/PC-3p-110122_70_XM_016079227.2_1817_TPlot.pdf	2	66.6089	3	0.857015	Output/S8h/cleaveLand_result/t_plot/PC-3p-110122_70_XM_016079227.2_1817_TPlot.pdf	0	0	NA	NA	NA	30.281	66.6089	0	1.1047e-15	4.24984e-15	yes	GO:0005623(cell);GO:0065007(biological regulation);GO:0050789(regulation of biological process);GO:0009987(cellular process);GO:0065008(regulation of biological quality);GO:0050794(regulation of cellular process);GO:0042592(homeostatic process);GO:0019725(cellular homeostasis);GO:0045454(cell redox homeostasis)	NA
PC-3p-110122_70	XM_016079967.2	1016	1037	1028	-32.1	-22.3	0.694704	9.5	3-9,1035-1029;11-21,1027-1017	1-2,1037-1036[UP5];10-10,1028-1028[SIL];22-22,1016-1016[UP3]	.(((((((((((.(((((((..&..))))))).))))))))))).	CAGUAGGGUUAGGGAGAAUCGC&AGGAUUCUUGUUAACUUUGCUU	6	181.686	2	0.954383	Output/S0h/cleaveLand_result/t_plot/PC-3p-110122_70_XM_016079967.2_1028_TPlot.pdf	13	432.958	2	0.946062	Output/S8h/cleaveLand_result/t_plot/PC-3p-110122_70_XM_016079967.2_1028_TPlot.pdf	1	26.8255	4	0.999961	Output/S24h/cleaveLand_result/t_plot/PC-3p-110122_70_XM_016079967.2_1028_TPlot.pdf	181.686	432.958	26.8255	4.5137e-86	4.56889e-84	yes	GO:0008270(zinc ion binding);GO:0019538(protein metabolic process);GO:0032446(protein modification by small protein conjugation);GO:0046872(metal ion binding);GO:0061659(ubiquitin-like protein ligase activity);GO:1901564(organonitrogen compound metabolic process);GO:0043632(modification-dependent macromolecule catabolic process);GO:0044257(cellular protein catabolic process);GO:0042787(protein ub…	NA
PC-3p-110122_70	XM_016080239.2	1999	2020	2011	-32.1	-21.6	0.672897	9.5	3-22,2018-1999	1-2,2020-2019[UP5]	((((((((((((((((((((..&..))))))))))))))))))))	AGGUGGGGUUAGCAAGGGUUGC&AGGAUUCUUGUUAACUUUGCUU	1	30.281	4	1	Output/S0h/cleaveLand_result/t_plot/PC-3p-110122_70_XM_016080239.2_2011_TPlot.pdf	3	99.9134	2	0.993292	Output/S8h/cleaveLand_result/t_plot/PC-3p-110122_70_XM_016080239.2_2011_TPlot.pdf	1	26.8255	4	1	Output/S24h/cleaveLand_result/t_plot/PC-3p-110122_70_XM_016080239.2_2011_TPlot.pdf	30.281	99.9134	26.8255	7.7624e-15	1.77012e-14	yes	GO:0044464(cell part);GO:0043227(membrane-bounded organelle);GO:0043229(intracellular organelle);GO:0044424(intracellular part);GO:0005545(1-phosphatidylinositol binding);GO:0005543(phospholipid binding);GO:0043168(anion binding);GO:0043623(cellular protein complex assembly);GO:0097708(intracellular vesicle);GO:0070271(protein complex biogenesis);GO:0016043(cellular component organization);GO:006…	NA
PC-3p-110122_70	XM_016080239.2	557	577	568	-32.1	-22.4	0.697819	8.5	1-12,577-566;15-20,564-559	13-14,565-565[AILq];21-22,558-557[UP3]	..((((((.-((((((((((((&))))))))))))..))))))..	ACGCAGAGG-GAUGAGGAUCCU&AGGAUUCUUGUUAACUUUGCUU	0	0	NA	NA	NA	0	0	NA	NA	NA	3	80.4764	2	0.962189	Output/S24h/cleaveLand_result/t_plot/PC-3p-110122_70_XM_016080239.2_568_TPlot.pdf	0	0	80.4764	1.1184e-35	1.47636e-34	yes	GO:0044464(cell part);GO:0043227(membrane-bounded organelle);GO:0043229(intracellular organelle);GO:0044424(intracellular part);GO:0005545(1-phosphatidylinositol binding);GO:0005543(phospholipid binding);GO:0043168(anion binding);GO:0043623(cellular protein complex assembly);GO:0097708(intracellular vesicle);GO:0070271(protein complex biogenesis);GO:0016043(cellular component organization);GO:006…	NA
PC-3p-110122_70	XM_016080430.2	1426	1446	1437	-32.1	-21.7	0.676012	10	2-11,1445-1436;15-21,1433-1427	1-1,1446-1446[UP5];12-14,1435-1434[AILq];22-22,1426-1426[UP3]	.(((((((..-((((((((((.&.))))))))))...))))))).	UGGCAGAGGU-GCAGGAAUUCA&AGGAUUCUUGUUAACUUUGCUU	0	0	NA	NA	NA	0	0	NA	NA	NA	1	26.8255	4	1	Output/S24h/cleaveLand_result/t_plot/PC-3p-110122_70_XM_016080430.2_1437_TPlot.pdf	0	0	26.8255	2.2374e-12	2.55455e-12	yes	GO:0016835(carbon-oxygen lyase activity);GO:1902223(erythrose 4-phosphate/phosphoenolpyruvate family amino acid biosynthetic process);GO:0008652(cellular amino acid biosynthetic process);GO:0044464(cell part);GO:0043227(membrane-bounded organelle);GO:0004664(prephenate dehydratase activity);GO:0009532(plastid stroma);GO:1902221(erythrose 4-phosphate/phosphoenolpyruvate family amino acid metabolic…	ko00400(Phenylalanine, tyrosine and tryptophan biosynthesis);ko01100(Metabolic pathways);ko01230(Biosynthesis of amino acids);ko01110(Biosynthesis of secondary metabolites)
PC-3p-110122_70	XM_016081035.2	971	994	985	-32.1	-21.96	0.684112	13.5	2-11,993-984;15-21,978-972	1-1,994-994[UP5];12-14,983-979[AILt];22-22,971-971[UP3]	.(((((((.....((((((((((.&.))))))))))--...))))))).	CGGCGAGGGCUGUACAAGGGUCCG&AGGAUUCUUGU--UAACUUUGCUU	1	30.281	4	0.99999	Output/S0h/cleaveLand_result/t_plot/PC-3p-110122_70_XM_016081035.2_985_TPlot.pdf	0	0	NA	NA	NA	0	0	NA	NA	NA	30.281	0	0	7.0631e-14	1.09903e-13	yes	GO:0070482(response to oxygen levels);GO:0009061(anaerobic respiration);GO:0019538(protein metabolic process);GO:0055114(oxidation-reduction process);GO:0044260(cellular macromolecule metabolic process);GO:0018171(peptidyl-cysteine oxidation);GO:0042221(response to chemical);GO:0016702(oxidoreductase activity, acting on single donors with incorporation of molecular oxygen, incorporation of two at…	ko01100(Metabolic pathways);ko00430(Taurine and hypotaurine metabolism)
PC-3p-110122_70	XM_016081466.2	234	254	245	-32.1	-22.4	0.697819	8	2-13,253-242;15-21,241-235	1-1,254-254[UP5];14-14,x-x[BULq];22-22,234-234[UP3]	.(((((((-((((((((((((.&.)))))))))))).))))))).	UGGCAGAG-UGAUAGGAAUCUC&AGGAUUCUUGUUAACUUUGCUU	0	0	NA	NA	NA	2	66.6089	3	0.530059	Output/S8h/cleaveLand_result/t_plot/PC-3p-110122_70_XM_016081466.2_245_TPlot.pdf	0	0	NA	NA	NA	0	66.6089	0	1.1789e-29	9.89421e-29	yes	GO:0004659(prenyltransferase activity);GO:0043227(membrane-bounded organelle);GO:0009507(chloroplast);GO:0005737(cytoplasm);GO:0043229(intracellular organelle);GO:0003824(catalytic activity);GO:0005623(cell);GO:0044424(intracellular part);GO:0044444(cytoplasmic part);GO:0016765(transferase activity, transferring alkyl or aryl (other than methyl) groups);GO:0009536(plastid);GO:0005622(intracellula…	ko01110(Biosynthesis of secondary metabolites);ko00130(Ubiquinone and other terpenoid-quinone biosynthesis);ko01100(Metabolic pathways)
PC-3p-110122_70	XM_016082058.2	801	824	813	-32.1	-22	0.685358	11.5	1-9,824-816;10-11,813-812;13-20,810-803	x-x,815-814[BULt];12-12,811-811[SIL];21-22,802-801[UP3]	..((((((((.((..(((((((((&)))))))))--)).))))))))..	AUGCAAGGUUUGCCAGAGGAUCCU&AGGAUUCUU--GUUAACUUUGCUU	0	0	NA	NA	NA	0	0	NA	NA	NA	1	26.8255	4	0.999998	Output/S24h/cleaveLand_result/t_plot/PC-3p-110122_70_XM_016082058.2_813_TPlot.pdf	0	0	26.8255	2.2374e-12	2.55455e-12	yes	GO:0043168(anion binding);GO:0044267(cellular protein metabolic process);GO:0016772(transferase activity, transferring phosphorus-containing groups);GO:0030554(adenyl nucleotide binding);GO:0006793(phosphorus metabolic process);GO:0006796(phosphate-containing compound metabolic process);GO:0016740(transferase activity);GO:0016310(phosphorylation);GO:1901265(nucleoside phosphate binding);GO:003621…	NA
PC-3p-110122_70	XM_016082314.2	2144	2163	2154	-32.1	-21.4	0.666667	7.5	2-16,2162-2148;19-21,2147-2145	1-1,2163-2163[UP5];17-18,x-x[BULq];22-22,2144-2144[UP3]	.(((--(((((((((((((((.&.)))))))))))))))..))).	UAGU--AGUUAACGGGGAUCCA&AGGAUUCUUGUUAACUUUGCUU	0	0	NA	NA	NA	0	0	NA	NA	NA	1	26.8255	4	1	Output/S24h/cleaveLand_result/t_plot/PC-3p-110122_70_XM_016082314.2_2154_TPlot.pdf	0	0	26.8255	2.2374e-12	2.55455e-12	yes	NA	ko03013(RNA transport)
PC-3p-110122_70	XM_016082670.2	500	523	512	-32.1	-25.9	0.806854	6.5	1-3,523-521;4-21,518-501	x-x,520-519[BULt];22-22,500-500[UP3]	.((((((((((((((((((..(((&)))--)))))))))))))))))).	UGGCGAGGUUAACAAGAAUGACCU&AGG--AUUCUUGUUAACUUUGCUU	9	272.529	2	0.211868	Output/S0h/cleaveLand_result/t_plot/PC-3p-110122_70_XM_016082670.2_512_TPlot.pdf	0	0	NA	NA	NA	6	160.953	2	0.238296	Output/S24h/cleaveLand_result/t_plot/PC-3p-110122_70_XM_016082670.2_512_TPlot.pdf	272.529	0	160.953	3.7385e-57	1.69637e-55	yes	GO:0003824(catalytic activity);GO:0015399(primary active transmembrane transporter activity);GO:0005773(vacuole);GO:0016817(hydrolase activity, acting on acid anhydrides);GO:0031090(organelle membrane);GO:0005623(cell);GO:0098805(whole membrane);GO:0043227(membrane-bounded organelle);GO:0016462(pyrophosphatase activity);GO:0005794(Golgi apparatus);GO:0016020(membrane);GO:0043492(ATPase activity, …	ko00190(Oxidative phosphorylation);ko04145(Phagosome);ko01100(Metabolic pathways)
PC-3p-110122_70	XM_016083881.2	2238	2258	2250	-32.1	-21.1	0.657321	9.5	2-6,2257-2253;10-22,2250-2238	1-1,2258-2258[UP5];7-9,2252-2251[AILq]	(((((((((((((..-(((((.&.)))))...)))))))))))))	AAGCGAAGUUGGCCA-AAUCCA&AGGAUUCUUGUUAACUUUGCUU	0	0	NA	NA	NA	0	0	NA	NA	NA	1	26.8255	4	1	Output/S24h/cleaveLand_result/t_plot/PC-3p-110122_70_XM_016083881.2_2250_TPlot.pdf	0	0	26.8255	2.2374e-12	2.55455e-12	yes	NA	NA
PC-3p-110122_70	XM_016084212.2	751	771	763	-32.1	-21.2	0.660436	8	2-9,770-763;11-21,762-752	1-1,771-771[UP5];10-10,x-x[BULq];22-22,751-751[UP3]	.(((((((((((-((((((((.&.)))))))).))))))))))).	UGGCAAGGUUAG-AAGGAUCUC&AGGAUUCUUGUUAACUUUGCUU	1	30.281	4	1	Output/S0h/cleaveLand_result/t_plot/PC-3p-110122_70_XM_016084212.2_763_TPlot.pdf	0	0	NA	NA	NA	1	26.8255	4	1	Output/S24h/cleaveLand_result/t_plot/PC-3p-110122_70_XM_016084212.2_763_TPlot.pdf	30.281	0	26.8255	5.3891e-07	5.57092e-07	yes	NA	NA
PC-3p-110122_70	XM_016084270.2	318	339	330	-32.1	-26.5	0.825545	6	2-4,338-336;7-22,333-318	1-1,339-339[UP5];5-6,335-334[SIL]	((((((((((((((((..(((.&.)))..))))))))))))))))	GAGCAAGGUUAACAAGCCUCCA&AGGAUUCUUGUUAACUUUGCUU	7	211.967	2	0.155463	Output/S0h/cleaveLand_result/t_plot/PC-3p-110122_70_XM_016084270.2_330_TPlot.pdf	1	33.3045	4	0.373755	Output/S8h/cleaveLand_result/t_plot/PC-3p-110122_70_XM_016084270.2_330_TPlot.pdf	1	26.8255	4	0.426464	Output/S24h/cleaveLand_result/t_plot/PC-3p-110122_70_XM_016084270.2_330_TPlot.pdf	211.967	33.3045	26.8255	1.3569e-53	5.80911e-52	yes	GO:0003735(structural constituent of ribosome);GO:0043228(non-membrane-bounded organelle);GO:0071704(organic substance metabolic process);GO:0006518(peptide metabolic process);GO:0043232(intracellular non-membrane-bounded organelle);GO:0043043(peptide biosynthetic process);GO:0022625(cytosolic large ribosomal subunit);GO:0022626(cytosolic ribosome);GO:0044237(cellular metabolic process);GO:000519…	ko03010(Ribosome)
PC-3p-110122_70	XM_016085507.2	2475	2496	2486	-32.1	-20.9	0.65109	7.5	2-6,2495-2491;7-16,2489-2480;19-22,2478-2475	1-1,2496-2496[UP5];x-x,2490-2490[BULt];17-18,2479-2479[AILq]	((((.-((((((((((.(((((.&.)))))-))))))))))..))))	GAGCU-AGUUGACAAGAAAUCUA&AGGAUU-CUUGUUAACUUUGCUU	0	0	NA	NA	NA	1	33.3045	4	1	Output/S8h/cleaveLand_result/t_plot/PC-3p-110122_70_XM_016085507.2_2486_TPlot.pdf	0	0	NA	NA	NA	0	33.3045	0	3.4347e-15	7.86611e-15	yes	GO:0044257(cellular protein catabolic process);GO:0019538(protein metabolic process);GO:0044267(cellular protein metabolic process);GO:0043412(macromolecule modification);GO:0019783(ubiquitin-like protein-specific protease activity);GO:0101005(ubiquitinyl hydrolase activity);GO:0036211(protein modification process);GO:0006511(ubiquitin-dependent protein catabolic process);GO:0044237(cellular meta…	NA
PC-3p-110122_70	XM_016085509.2	2474	2495	2485	-32.1	-20.9	0.65109	7.5	2-6,2494-2490;7-16,2488-2479;19-22,2477-2474	1-1,2495-2495[UP5];x-x,2489-2489[BULt];17-18,2478-2478[AILq]	((((.-((((((((((.(((((.&.)))))-))))))))))..))))	GAGCU-AGUUGACAAGAAAUCUA&AGGAUU-CUUGUUAACUUUGCUU	0	0	NA	NA	NA	0	0	NA	NA	NA	2	53.6509	1	0.434036	Output/S24h/cleaveLand_result/t_plot/PC-3p-110122_70_XM_016085509.2_2485_TPlot.pdf	0	0	53.6509	5.0035e-24	2.27989e-23	yes	GO:0044257(cellular protein catabolic process);GO:0019538(protein metabolic process);GO:0044267(cellular protein metabolic process);GO:0043412(macromolecule modification);GO:0019783(ubiquitin-like protein-specific protease activity);GO:0101005(ubiquitinyl hydrolase activity);GO:0036211(protein modification process);GO:0006511(ubiquitin-dependent protein catabolic process);GO:0044237(cellular meta…	NA
PC-3p-110122_70	XM_016085670.2	391	413	404	-32.1	-21.8	0.679128	7	2-3,412-411;5-13,409-401;14-20,399-393	1-1,413-413[UP5];4-4,410-410[SIL];x-x,400-400[BULt];21-22,392-391[UP3]	..(((((((.(((((((((.((.&.)).)))))))))-)))))))..	UCGCGAGGUAUAACAAGAAACCA&AGGAUUCUUGUUA-ACUUUGCUU	1	30.281	4	0.999998	Output/S0h/cleaveLand_result/t_plot/PC-3p-110122_70_XM_016085670.2_404_TPlot.pdf	3	99.9134	2	0.98701	Output/S8h/cleaveLand_result/t_plot/PC-3p-110122_70_XM_016085670.2_404_TPlot.pdf	2	53.6509	3	0.777179	Output/S24h/cleaveLand_result/t_plot/PC-3p-110122_70_XM_016085670.2_404_TPlot.pdf	30.281	99.9134	53.6509	1.2575e-09	1.39827e-09	yes	GO:0043227(membrane-bounded organelle);GO:0003676(nucleic acid binding);GO:0000786(nucleosome);GO:1901363(heterocyclic compound binding);GO:0044815(DNA packaging complex);GO:0046983(protein dimerization activity);GO:0097159(organic cyclic compound binding);GO:0043231(intracellular membrane-bounded organelle);GO:0044424(intracellular part);GO:0043228(non-membrane-bounded organelle);GO:0032991(macr…	NA
PC-3p-110122_70	XM_016086542.2	1576	1598	1589	-32.1	-23.2	0.722741	4.5	1-14,1598-1585;15-22,1583-1576	x-x,1584-1584[BULt]	((((((((.((((((((((((((&))))))))))))))-))))))))	AAGCAAGGAUUAACAAGGAUUUU&AGGAUUCUUGUUAA-CUUUGCUU	0	0	NA	NA	NA	1	33.3045	4	0.989233	Output/S8h/cleaveLand_result/t_plot/PC-3p-110122_70_XM_016086542.2_1589_TPlot.pdf	1	26.8255	4	0.995404	Output/S24h/cleaveLand_result/t_plot/PC-3p-110122_70_XM_016086542.2_1589_TPlot.pdf	0	33.3045	26.8255	1.7537e-07	1.85914e-07	yes	GO:0006518(peptide metabolic process);GO:0016875(ligase activity, forming carbon-oxygen bonds);GO:0043043(peptide biosynthetic process);GO:0036094(small molecule binding);GO:0044249(cellular biosynthetic process);GO:0043168(anion binding);GO:0009058(biosynthetic process);GO:0043038(amino acid activation);GO:0044281(small molecule metabolic process);GO:1901576(organic substance biosynthetic proces…	ko00970(Aminoacyl-tRNA biosynthesis)
PC-3p-110122_70	XM_016086701.2	669	691	681	-32.1	-23.8	0.741433	7	1-4,691-688;5-12,686-679;15-22,676-669	x-x,687-687[BULt];13-14,678-677[SIL]	((((((((..((((((((.((((&))))-))))))))..))))))))	GAGCGAAGAGAGCAAGAGCUCCU&AGGA-UUCUUGUUAACUUUGCUU	1	30.281	4	0.880473	Output/S0h/cleaveLand_result/t_plot/PC-3p-110122_70_XM_016086701.2_681_TPlot.pdf	0	0	NA	NA	NA	0	0	NA	NA	NA	30.281	0	0	7.0631e-14	1.09903e-13	yes	NA	ko04712(Circadian rhythm - plant)
PC-3p-110122_70	XM_016086828.2	251	270	262	-32.1	-22.5	0.700935	6	2-8,269-263;10-17,262-255;19-22,254-251	1-1,270-270[UP5];9-9,x-x[BULq];18-18,x-x[BULq]	((((-((((((((-(((((((.&.))))))).)))))))).))))	GAGC-GAGUUAAC-GGAAUCCG&AGGAUUCUUGUUAACUUUGCUU	3	90.843	2	0.928234	Output/S0h/cleaveLand_result/t_plot/PC-3p-110122_70_XM_016086828.2_262_TPlot.pdf	2	66.6089	2	0.917203	Output/S8h/cleaveLand_result/t_plot/PC-3p-110122_70_XM_016086828.2_262_TPlot.pdf	1	26.8255	4	0.999828	Output/S24h/cleaveLand_result/t_plot/PC-3p-110122_70_XM_016086828.2_262_TPlot.pdf	90.843	66.6089	26.8255	4.104e-08	4.55167e-08	yes	GO:0009813(flavonoid biosynthetic process);GO:0009058(biosynthetic process);GO:0009812(flavonoid metabolic process);GO:0016872(intramolecular lyase activity);GO:0003824(catalytic activity);GO:0045430(chalcone isomerase activity);GO:1901576(organic substance biosynthetic process);GO:0016853(isomerase activity);GO:0008152(metabolic process);GO:0071704(organic substance metabolic process)	ko01100(Metabolic pathways);ko01110(Biosynthesis of secondary metabolites);ko00941(Flavonoid biosynthesis)
PC-3p-110122_70	XM_016087637.2	2197	2221	2212	-32.1	-21.2	0.660436	10.5	2-17,2220-2205;18-21,2201-2198	1-1,2221-2221[UP5];x-x,2204-2202[BULt];22-22,2197-2197[UP3]	.((((...((((((((((((((((.&.))))))))))))))))---)))).	UAGUACUGGGGUUGGCAAGAGUCUC&AGGAUUCUUGUUAACUU---UGCUU	2	60.562	1	0.33867	Output/S0h/cleaveLand_result/t_plot/PC-3p-110122_70_XM_016087637.2_2212_TPlot.pdf	0	0	NA	NA	NA	0	0	NA	NA	NA	60.562	0	0	4.9856e-27	3.03728e-26	yes	GO:2000112(regulation of cellular macromolecule biosynthetic process);GO:0044464(cell part);GO:0051246(regulation of protein metabolic process);GO:0044248(cellular catabolic process);GO:0043228(non-membrane-bounded organelle);GO:0005737(cytoplasm);GO:0019439(aromatic compound catabolic process);GO:0006139(nucleobase-containing compound metabolic process);GO:0043170(macromolecule metabolic process…	ko03018(RNA degradation)
PC-3p-110122_70	XM_016087838.2	1542	1565	1553	-32.1	-20.9	0.65109	9	1-5,1565-1561;6-18,1557-1545;20-22,1544-1542	x-x,1560-1558[BULt];19-19,x-x[BULq]	(((-(((((((((((((...(((((&)))))---))))))))))))).)))	GAG-AAGGUUAACAGGAAAUAUCCU&AGGAU---UCUUGUUAACUUUGCUU	2	60.562	3	0.93743	Output/S0h/cleaveLand_result/t_plot/PC-3p-110122_70_XM_016087838.2_1553_TPlot.pdf	2	66.6089	3	0.924362	Output/S8h/cleaveLand_result/t_plot/PC-3p-110122_70_XM_016087838.2_1553_TPlot.pdf	3	80.4764	2	0.999985	Output/S24h/cleaveLand_result/t_plot/PC-3p-110122_70_XM_016087838.2_1553_TPlot.pdf	60.562	66.6089	80.4764	0.22176	0.223593	yes	GO:0030880(RNA polymerase complex);GO:0005622(intracellular);GO:1901564(organonitrogen compound metabolic process);GO:0043234(protein complex);GO:0044451(nucleoplasm part);GO:2001141(regulation of RNA biosynthetic process);GO:0008152(metabolic process);GO:0009891(positive regulation of biosynthetic process);GO:0006357(regulation of transcription from RNA polymerase II promoter);GO:0008023(transcr…	NA
PC-3p-110122_70	XM_016088364.2	4077	4100	4091	-32.1	-23.3	0.725857	7	1-18,4100-4083;19-21,4080-4078	x-x,4082-4081[BULt];22-22,4077-4077[UP3]	.(((..((((((((((((((((((&))))))))))))))))))--))).	CAGUUUGAAGUUGACAAGAGUCUU&AGGAUUCUUGUUAACUUU--GCUU	0	0	NA	NA	NA	1	33.3045	4	0.979178	Output/S8h/cleaveLand_result/t_plot/PC-3p-110122_70_XM_016088364.2_4091_TPlot.pdf	0	0	NA	NA	NA	0	33.3045	0	3.4347e-15	7.86611e-15	yes	NA	NA
PC-3p-110122_70	XM_016089588.2	1502	1529	1520	-32.1	-23.5	0.732087	17.5	2-10,1528-1520;11-21,1513-1503	1-1,1529-1529[UP5];x-x,1519-1514[BULt];22-22,1502-1502[UP3]	.(((((((((((......(((((((((.&.)))))))))------))))))))))).	UGGCAAAGUUGAAACCUUCGGGAAUCCA&AGGAUUCUUG------UUAACUUUGCUU	0	0	NA	NA	NA	0	0	NA	NA	NA	1	26.8255	4	0.976244	Output/S24h/cleaveLand_result/t_plot/PC-3p-110122_70_XM_016089588.2_1520_TPlot.pdf	0	0	26.8255	2.2374e-12	2.55455e-12	yes	GO:0016021(integral component of membrane);GO:0043231(intracellular membrane-bounded organelle);GO:0003677(DNA binding);GO:0043226(organelle);GO:0043229(intracellular organelle);GO:0005488(binding);GO:0097159(organic cyclic compound binding);GO:1901363(heterocyclic compound binding);GO:0003676(nucleic acid binding);GO:0044424(intracellular part);GO:0005623(cell);GO:0005634(nucleus);GO:0016020(mem…	ko04075(Plant hormone signal transduction)
PC-3p-110122_70	XM_016092255.2	673	694	685	-32.1	-22.9	0.713396	9.5	3-12,692-683;15-21,680-674	1-2,694-693[UP5];13-14,682-681[SIL];22-22,673-673[UP3]	.(((((((..((((((((((..&..))))))))))..))))))).	UGGCAAAGGAAGCAGGGAUCAU&AGGAUUCUUGUUAACUUUGCUU	1	30.281	4	0.996585	Output/S0h/cleaveLand_result/t_plot/PC-3p-110122_70_XM_016092255.2_685_TPlot.pdf	0	0	NA	NA	NA	0	0	NA	NA	NA	30.281	0	0	7.0631e-14	1.09903e-13	yes	GO:0055085(transmembrane transport);GO:0044425(membrane part);GO:0051179(localization);GO:0016021(integral component of membrane);GO:0006810(transport);GO:0051234(establishment of localization);GO:0031224(intrinsic component of membrane);GO:0016020(membrane)	NA
PC-3p-110122_70	XM_016093246.2	2796	2821	2808	-32.1	-21.1	0.657321	13.5	1-2,2821-2820;4-9,2818-2813;10-22,2808-2796	3-3,2819-2819[SIL];x-x,2812-2809[BULt]	(((((((((((((....((((((.((&)).))))))----)))))))))))))	AAGUAAAGUUGGCUACCGAGAAUGCU&AGGAUUCUU----GUUAACUUUGCUU	0	0	NA	NA	NA	0	0	NA	NA	NA	1	26.8255	4	1	Output/S24h/cleaveLand_result/t_plot/PC-3p-110122_70_XM_016093246.2_2808_TPlot.pdf	0	0	26.8255	2.2374e-12	2.55455e-12	yes	NA	NA
PC-3p-110122_70	XM_016093976.2	444	465	457	-32.1	-22.5	0.700935	9	2-3,464-463;5-12,462-455;13-22,453-444	1-1,465-465[UP5];4-4,x-x[BULq];x-x,454-454[BULt]	((((((((((.((((((((-((.&.)).))))))))-))))))))))	GGGCAAAGUUGGGCAGGAA-CCA&AGGAUUCUUGUU-AACUUUGCUU	0	0	NA	NA	NA	0	0	NA	NA	NA	1	26.8255	4	0.999879	Output/S24h/cleaveLand_result/t_plot/PC-3p-110122_70_XM_016093976.2_457_TPlot.pdf	0	0	26.8255	2.2374e-12	2.55455e-12	yes	GO:0032549(ribonucleoside binding);GO:0000166(nucleotide binding);GO:0043168(anion binding);GO:0097367(carbohydrate derivative binding);GO:0019001(guanyl nucleotide binding);GO:0036094(small molecule binding);GO:0032555(purine ribonucleotide binding);GO:0005488(binding);GO:0017076(purine nucleotide binding);GO:0001883(purine nucleoside binding);GO:0016787(hydrolase activity);GO:0032550(purine rib…	NA
PC-3p-110122_70	XM_016094798.2	321	342	333	-32.1	-21.6	0.672897	9	1-2,342-341;5-12,338-331;15-21,328-322	3-4,340-339[SIL];13-14,330-329[SIL];22-22,321-321[UP3]	.(((((((..((((((((..((&))..))))))))..))))))).	UGGCAGAGGUGACAAGAAAACU&AGGAUUCUUGUUAACUUUGCUU	1	30.281	4	1	Output/S0h/cleaveLand_result/t_plot/PC-3p-110122_70_XM_016094798.2_333_TPlot.pdf	0	0	NA	NA	NA	0	0	NA	NA	NA	30.281	0	0	7.0631e-14	1.09903e-13	yes	GO:0044237(cellular metabolic process);GO:0071840(cellular component organization or biogenesis);GO:1990904(ribonucleoprotein complex);GO:0043231(intracellular membrane-bounded organelle);GO:0044464(cell part);GO:0009941(chloroplast envelope);GO:0009507(chloroplast);GO:0044267(cellular protein metabolic process);GO:0044260(cellular macromolecule metabolic process);GO:0032991(macromolecular comple…	NA
PC-3p-110122_70	XM_016095903.2	675	698	687	-32.1	-21.2	0.660436	12.5	2-5,697-694;6-19,691-678	1-1,698-698[UP5];x-x,693-692[BULt];20-22,677-675[UP3]	...((((((((((((((..((((.&.))))--))))))))))))))...	CCUCAGAGUUGACGGGAAGGUCCG&AGGAU--UCUUGUUAACUUUGCUU	0	0	NA	NA	NA	0	0	NA	NA	NA	6	160.953	2	0.999814	Output/S24h/cleaveLand_result/t_plot/PC-3p-110122_70_XM_016095903.2_687_TPlot.pdf	0	0	160.953	1.2454e-70	8.89643e-69	yes	GO:0031226(intrinsic component of plasma membrane);GO:0050789(regulation of biological process);GO:0005886(plasma membrane);GO:0007165(signal transduction);GO:0044464(cell part);GO:0006952(defense response);GO:0030054(cell junction);GO:0046658(anchored component of plasma membrane);GO:0050896(response to stimulus);GO:0005911(cell-cell junction);GO:0065007(biological regulation);GO:0016020(membran…	NA
PC-3p-110122_70	XM_016096010.2	891	913	904	-32.1	-21.2	0.660436	9	3-11,911-903;12-21,901-892	1-2,913-912[UP5];x-x,902-902[BULt];22-22,891-891[UP3]	.((((((((((.(((((((((..&..)))))))))-)))))))))).	CAGUGAAGUUGUACAAGGAUCAC&AGGAUUCUUGU-UAACUUUGCUU	0	0	NA	NA	NA	1	33.3045	4	1	Output/S8h/cleaveLand_result/t_plot/PC-3p-110122_70_XM_016096010.2_904_TPlot.pdf	1	26.8255	4	1	Output/S24h/cleaveLand_result/t_plot/PC-3p-110122_70_XM_016096010.2_904_TPlot.pdf	0	33.3045	26.8255	1.7537e-07	1.85914e-07	yes	GO:0044425(membrane part);GO:0016021(integral component of membrane);GO:0016020(membrane);GO:0031224(intrinsic component of membrane)	NA
PC-3p-110122_70	XM_016096287.2	357	378	369	-32.1	-21.6	0.672897	8	2-2,377-377;4-9,375-370;11-17,368-362;19-22,360-357	1-1,378-378[UP5];3-3,376-376[SIL];10-10,369-369[SIL];18-18,361-361[SIL]	((((.(((((((.((((((.(.&.).)))))).))))))).))))	GAGCUGAGUUGAGAAGAAUGCA&AGGAUUCUUGUUAACUUUGCUU	0	0	NA	NA	NA	0	0	NA	NA	NA	1	26.8255	4	1	Output/S24h/cleaveLand_result/t_plot/PC-3p-110122_70_XM_016096287.2_369_TPlot.pdf	0	0	26.8255	2.2374e-12	2.55455e-12	yes	NA	NA
PC-3p-110122_70	XM_016096689.2	1089	1108	1101	-32.1	-22.4	0.697819	8	2-8,1107-1101;11-21,1100-1090	1-1,1108-1108[UP5];9-10,x-x[BULq];22-22,1089-1089[UP3]	.(((((((((((--(((((((.&.)))))))..))))))))))).	UGGCAAGGUUGA--AGAAUCCA&AGGAUUCUUGUUAACUUUGCUU	2	60.562	2	0.949594	Output/S0h/cleaveLand_result/t_plot/PC-3p-110122_70_XM_016096689.2_1101_TPlot.pdf	0	0	NA	NA	NA	0	0	NA	NA	NA	60.562	0	0	4.9856e-27	3.03728e-26	yes	GO:1990837(sequence-specific double-stranded DNA binding);GO:0034654(nucleobase-containing compound biosynthetic process);GO:0003690(double-stranded DNA binding);GO:0097159(organic cyclic compound binding);GO:0003677(DNA binding);GO:0044464(cell part);GO:0006139(nucleobase-containing compound metabolic process);GO:0044271(cellular nitrogen compound biosynthetic process);GO:0032774(RNA biosyntheti…	ko04075(Plant hormone signal transduction);ko04712(Circadian rhythm - plant)
PC-3p-110122_70	XM_016097141.2	1595	1617	1608	-32.1	-21.6	0.672897	9	3-10,1615-1608;11-16,1606-1601;18-22,1599-1595	1-2,1617-1616[UP5];x-x,1607-1607[BULt];17-17,1600-1600[SIL]	(((((.((((((.((((((((..&..))))))))-)))))).)))))	AGGCAUGGUUGAUCGAGAAUCAU&AGGAUUCUUG-UUAACUUUGCUU	0	0	NA	NA	NA	4	133.218	2	0.994199	Output/S8h/cleaveLand_result/t_plot/PC-3p-110122_70_XM_016097141.2_1608_TPlot.pdf	0	0	NA	NA	NA	0	133.218	0	1.3856e-58	6.36816e-57	yes	GO:0000166(nucleotide binding);GO:0016628(oxidoreductase activity, acting on the CH-CH group of donors, NAD or NADP as acceptor);GO:0048037(cofactor binding);GO:0016021(integral component of membrane);GO:0043168(anion binding);GO:0016020(membrane);GO:1901265(nucleoside phosphate binding);GO:0005488(binding);GO:0008202(steroid metabolic process);GO:0016614(oxidoreductase activity, acting on CH-OH …	ko01100(Metabolic pathways);ko01110(Biosynthesis of secondary metabolites);ko00100(Steroid biosynthesis)
PC-3p-110122_70	XM_016097382.2	663	685	675	-32.1	-22.6	0.70405	8	1-6,685-680;7-13,678-672;15-20,670-665	x-x,679-679[BULt];14-14,671-671[SIL];21-22,664-663[UP3]	..((((((.(((((((.((((((&))))))-))))))).))))))..	CUGCAAAGAUGGCAAGUGAUCCU&AGGAUU-CUUGUUAACUUUGCUU	0	0	NA	NA	NA	1	33.3045	4	0.998542	Output/S8h/cleaveLand_result/t_plot/PC-3p-110122_70_XM_016097382.2_675_TPlot.pdf	0	0	NA	NA	NA	0	33.3045	0	3.4347e-15	7.86611e-15	yes	GO:0016020(membrane)	NA
PC-3p-110122_70	XM_016097640.2	1755	1780	1771	-32.1	-21.16	0.65919	13.5	2-12,1779-1769;15-22,1762-1755	1-1,1780-1780[UP5];13-14,1768-1763[AILt]	((((((((......(((((((((((.&.)))))))))))----..))))))))	AAGCAGAGAGGGUGAGCAAGAAUUCA&AGGAUUCUUGUU----AACUUUGCUU	0	0	NA	NA	NA	1	33.3045	4	1	Output/S8h/cleaveLand_result/t_plot/PC-3p-110122_70_XM_016097640.2_1771_TPlot.pdf	0	0	NA	NA	NA	0	33.3045	0	3.4347e-15	7.86611e-15	yes	NA	ko03013(RNA transport)
PC-3p-110122_70	XM_016097900.2	1247	1271	1262	-32.1	-22.4	0.697819	5.5	2-13,1270-1259;14-16,1257-1255;17-21,1252-1248	1-1,1271-1271[UP5];x-x,1258-1258[BULt];x-x,1254-1253[BULt];22-22,1247-1247[UP3]	.(((((..(((.((((((((((((.&.))))))))))))-)))--))))).	CAGCGAUCAGUGUAACAAGAAUCCC&AGGAUUCUUGUUA-ACU--UUGCUU	1	30.281	4	0.999756	Output/S0h/cleaveLand_result/t_plot/PC-3p-110122_70_XM_016097900.2_1262_TPlot.pdf	0	0	NA	NA	NA	0	0	NA	NA	NA	30.281	0	0	7.0631e-14	1.09903e-13	yes	NA	NA
PC-3p-110122_70	XM_016097901.2	1216	1240	1231	-32.1	-22.4	0.697819	5.5	2-13,1239-1228;14-16,1226-1224;17-21,1221-1217	1-1,1240-1240[UP5];x-x,1227-1227[BULt];x-x,1223-1222[BULt];22-22,1216-1216[UP3]	.(((((..(((.((((((((((((.&.))))))))))))-)))--))))).	CAGCGAUCAGUGUAACAAGAAUCCC&AGGAUUCUUGUUA-ACU--UUGCUU	0	0	NA	NA	NA	0	0	NA	NA	NA	1	26.8255	4	0.999949	Output/S24h/cleaveLand_result/t_plot/PC-3p-110122_70_XM_016097901.2_1231_TPlot.pdf	0	0	26.8255	2.2374e-12	2.55455e-12	yes	NA	NA
PC-3p-110122_70	XM_016100648.2	1940	1962	1953	-32.1	-24.4	0.760125	7	1-2,1962-1961;4-15,1959-1948;16-22,1946-1940	3-3,1960-1960[SIL];x-x,1947-1947[BULt]	(((((((.((((((((((((.((&)).))))))))))))-)))))))	AAGCAGGUGUUGGCAAGAGUGCU&AGGAUUCUUGUUAAC-UUUGCUU	2	60.562	2	0.369233	Output/S0h/cleaveLand_result/t_plot/PC-3p-110122_70_XM_016100648.2_1953_TPlot.pdf	0	0	NA	NA	NA	0	0	NA	NA	NA	60.562	0	0	4.9856e-27	3.03728e-26	yes	NA	NA
PC-3p-110122_70	XM_016100841.2	1889	1914	1901	-32.1	-21.4	0.666667	16.5	2-6,1913-1909;7-12,1904-1899;15-22,1896-1889	1-1,1914-1914[UP5];x-x,1908-1905[BULt];13-14,1898-1897[SIL]	((((((((..((((((....(((((.&.)))))----))))))..))))))))	GAGCAGGGGAGGCAGGCUAUGAUCCG&AGGAUU----CUUGUUAACUUUGCUU	1	30.281	4	1	Output/S0h/cleaveLand_result/t_plot/PC-3p-110122_70_XM_016100841.2_1901_TPlot.pdf	0	0	NA	NA	NA	0	0	NA	NA	NA	30.281	0	0	7.0631e-14	1.09903e-13	yes	GO:0043170(macromolecule metabolic process);GO:0071840(cellular component organization or biogenesis);GO:0070013(intracellular organelle lumen);GO:0036211(protein modification process);GO:0044446(intracellular organelle part);GO:1901564(organonitrogen compound metabolic process);GO:0019538(protein metabolic process);GO:0044237(cellular metabolic process);GO:0032991(macromolecular complex);GO:0005…	NA
PC-3p-110122_70	XM_016101943.2	325	345	337	-32.1	-22.1	0.688474	7	2-5,344-341;7-12,340-335;15-21,332-326	1-1,345-345[UP5];6-6,x-x[BULq];13-14,334-333[SIL];22-22,325-325[UP3]	.(((((((..((((((-((((.&.)))).))))))..))))))).	CGGCAAGGGCAACAAG-AUCCG&AGGAUUCUUGUUAACUUUGCUU	4	121.124	2	0.970781	Output/S0h/cleaveLand_result/t_plot/PC-3p-110122_70_XM_016101943.2_337_TPlot.pdf	5	166.522	2	0.964605	Output/S8h/cleaveLand_result/t_plot/PC-3p-110122_70_XM_016101943.2_337_TPlot.pdf	1	26.8255	4	0.999991	Output/S24h/cleaveLand_result/t_plot/PC-3p-110122_70_XM_016101943.2_337_TPlot.pdf	121.124	166.522	26.8255	9.0972e-22	3.99032e-21	yes	GO:0016020(membrane);GO:0044425(membrane part);GO:0016021(integral component of membrane);GO:0031224(intrinsic component of membrane)	ko00190(Oxidative phosphorylation);ko01100(Metabolic pathways)
PC-3p-110122_70	XM_016103578.2	801	824	815	-32.1	-21.3	0.663551	9.5	2-10,823-815;12-13,813-812;14-22,809-801	1-1,824-824[UP5];11-11,814-814[SIL];x-x,811-810[BULt]	(((((((((..((.(((((((((.&.))))))))).))--)))))))))	GAGCAGGGUCUUGUUAAGGAUCCA&AGGAUUCUUGUUA--ACUUUGCUU	1	30.281	4	1	Output/S0h/cleaveLand_result/t_plot/PC-3p-110122_70_XM_016103578.2_815_TPlot.pdf	1	33.3045	4	1	Output/S8h/cleaveLand_result/t_plot/PC-3p-110122_70_XM_016103578.2_815_TPlot.pdf	0	0	NA	NA	NA	30.281	33.3045	0	1.1203e-07	1.21623e-07	yes	GO:0006629(lipid metabolic process);GO:0008233(peptidase activity);GO:0016787(hydrolase activity);GO:1901575(organic substance catabolic process);GO:0030163(protein catabolic process);GO:0008152(metabolic process);GO:0004175(endopeptidase activity);GO:0043170(macromolecule metabolic process);GO:0003824(catalytic activity);GO:0019538(protein metabolic process);GO:0044238(primary metabolic process)…	NA
PC-3p-110122_70	XM_016104362.2	1197	1218	1209	-32.1	-21	0.654206	11	2-5,1217-1214;7-12,1212-1207;15-20,1204-1199	1-1,1218-1218[UP5];6-6,1213-1213[SIL];13-14,1206-1205[SIL];21-22,1198-1197[UP3]	..((((((..((((((.((((.&.)))).))))))..))))))..	UUGCAGGGGAAGCAGGUGUCCC&AGGAUUCUUGUUAACUUUGCUU	0	0	NA	NA	NA	0	0	NA	NA	NA	1	26.8255	4	1	Output/S24h/cleaveLand_result/t_plot/PC-3p-110122_70_XM_016104362.2_1209_TPlot.pdf	0	0	26.8255	2.2374e-12	2.55455e-12	yes	GO:0032555(purine ribonucleotide binding);GO:0006807(nitrogen compound metabolic process);GO:1901265(nucleoside phosphate binding);GO:0036094(small molecule binding);GO:0046872(metal ion binding);GO:0046914(transition metal ion binding);GO:0016787(hydrolase activity);GO:0000166(nucleotide binding);GO:0008270(zinc ion binding);GO:0043168(anion binding);GO:0097367(carbohydrate derivative binding);G…	NA
PC-3p-110122_70	XM_016105930.2	1381	1402	1393	-32.1	-23.5	0.732087	9	2-2,1401-1401;5-21,1398-1382	1-1,1402-1402[UP5];3-4,1400-1399[SIL];22-22,1381-1381[UP3]	.(((((((((((((((((..(.&.)..))))))))))))))))).	UGGCAAGGUUAACAGGAGCACA&AGGAUUCUUGUUAACUUUGCUU	4	121.124	2	0.695915	Output/S0h/cleaveLand_result/t_plot/PC-3p-110122_70_XM_016105930.2_1393_TPlot.pdf	3	99.9134	2	0.675619	Output/S8h/cleaveLand_result/t_plot/PC-3p-110122_70_XM_016105930.2_1393_TPlot.pdf	2	53.6509	2	0.743593	Output/S24h/cleaveLand_result/t_plot/PC-3p-110122_70_XM_016105930.2_1393_TPlot.pdf	121.124	99.9134	53.6509	2.2543e-06	2.32497e-06	yes	GO:0016021(integral component of membrane);GO:0031224(intrinsic component of membrane);GO:0044425(membrane part);GO:0016020(membrane)	ko03013(RNA transport);ko03008(Ribosome biogenesis in eukaryotes)
PC-3p-110122_70	XM_016105931.2	1386	1407	1398	-32.1	-23.5	0.732087	9	2-2,1406-1406;5-21,1403-1387	1-1,1407-1407[UP5];3-4,1405-1404[SIL];22-22,1386-1386[UP3]	.(((((((((((((((((..(.&.)..))))))))))))))))).	UGGCAAGGUUAACAGGAGCACA&AGGAUUCUUGUUAACUUUGCUU	1	30.281	4	0.957267	Output/S0h/cleaveLand_result/t_plot/PC-3p-110122_70_XM_016105931.2_1398_TPlot.pdf	0	0	NA	NA	NA	2	53.6509	2	0.710054	Output/S24h/cleaveLand_result/t_plot/PC-3p-110122_70_XM_016105931.2_1398_TPlot.pdf	30.281	0	53.6509	5.8531e-12	6.61749e-12	yes	GO:0016021(integral component of membrane);GO:0031224(intrinsic component of membrane);GO:0044425(membrane part);GO:0016020(membrane)	ko03013(RNA transport);ko03008(Ribosome biogenesis in eukaryotes)
PC-3p-110122_70	XM_016105946.2	632	654	644	-32.1	-22.4	0.697819	13.5	2-9,653-646;14-22,640-632	1-1,654-654[UP5];10-13,645-641[AILt]	(((((((((.....((((((((.&.))))))))-....)))))))))	GAGCGAGGUGUUAAGAGAGUCCG&AGGAUUCUU-GUUAACUUUGCUU	2	60.562	3	0.564102	Output/S0h/cleaveLand_result/t_plot/PC-3p-110122_70_XM_016105946.2_644_TPlot.pdf	3	99.9134	2	0.936254	Output/S8h/cleaveLand_result/t_plot/PC-3p-110122_70_XM_016105946.2_644_TPlot.pdf	1	26.8255	4	0.999931	Output/S24h/cleaveLand_result/t_plot/PC-3p-110122_70_XM_016105946.2_644_TPlot.pdf	60.562	99.9134	26.8255	4.9152e-10	5.47296e-10	yes	GO:0043167(ion binding);GO:0071704(organic substance metabolic process);GO:0004619(phosphoglycerate mutase activity);GO:0044424(intracellular part);GO:0008152(metabolic process);GO:1901575(organic substance catabolic process);GO:0044282(small molecule catabolic process);GO:0016868(intramolecular transferase activity, phosphotransferases);GO:0046914(transition metal ion binding);GO:0009056(catabol…	ko01230(Biosynthesis of amino acids);ko01110(Biosynthesis of secondary metabolites);ko00260(Glycine, serine and threonine metabolism);ko01200(Carbon metabolism);ko00010(Glycolysis / Gluconeogenesis);ko01100(Metabolic pathways)
PC-3p-110122_70	XM_016105947.2	632	654	644	-32.1	-22.4	0.697819	13.5	2-9,653-646;14-22,640-632	1-1,654-654[UP5];10-13,645-641[AILt]	(((((((((.....((((((((.&.))))))))-....)))))))))	GAGCGAGGUGUUAAGAGAGUCCG&AGGAUUCUU-GUUAACUUUGCUU	2	60.562	3	0.550525	Output/S0h/cleaveLand_result/t_plot/PC-3p-110122_70_XM_016105947.2_644_TPlot.pdf	0	0	NA	NA	NA	0	0	NA	NA	NA	60.562	0	0	4.9856e-27	3.03728e-26	yes	GO:0043167(ion binding);GO:0071704(organic substance metabolic process);GO:0004619(phosphoglycerate mutase activity);GO:0044424(intracellular part);GO:0008152(metabolic process);GO:1901575(organic substance catabolic process);GO:0044282(small molecule catabolic process);GO:0016868(intramolecular transferase activity, phosphotransferases);GO:0046914(transition metal ion binding);GO:0009056(catabol…	ko01230(Biosynthesis of amino acids);ko01110(Biosynthesis of secondary metabolites);ko00260(Glycine, serine and threonine metabolism);ko01200(Carbon metabolism);ko00010(Glycolysis / Gluconeogenesis);ko01100(Metabolic pathways)
PC-3p-110122_70	XM_016107246.2	648	670	661	-32.1	-22.32	0.695327	9	1-11,670-660;15-22,655-648	12-14,659-656[AILt]	((((((((....(((((((((((&)))))))))))-...))))))))	AGGUAGGGAGAUACAAGAGUCCU&AGGAUUCUUGU-UAACUUUGCUU	1	30.281	4	0.999867	Output/S0h/cleaveLand_result/t_plot/PC-3p-110122_70_XM_016107246.2_661_TPlot.pdf	2	66.6089	3	0.557067	Output/S8h/cleaveLand_result/t_plot/PC-3p-110122_70_XM_016107246.2_661_TPlot.pdf	0	0	NA	NA	NA	30.281	66.6089	0	1.1047e-15	4.24984e-15	yes	GO:1901566(organonitrogen compound biosynthetic process);GO:0016866(intramolecular transferase activity);GO:0044238(primary metabolic process);GO:1901564(organonitrogen compound metabolic process);GO:0006807(nitrogen compound metabolic process);GO:0046394(carboxylic acid biosynthetic process);GO:0043648(dicarboxylic acid metabolic process);GO:0009073(aromatic amino acid family biosynthetic proces…	ko01110(Biosynthesis of secondary metabolites);ko00400(Phenylalanine, tyrosine and tryptophan biosynthesis);ko01230(Biosynthesis of amino acids);ko01100(Metabolic pathways)
PC-3p-110122_70	XM_016108333.2	1513	1535	1526	-32.1	-21.4	0.666667	7.5	2-9,1534-1527;11-18,1525-1518;19-20,1516-1515	1-1,1535-1535[UP5];10-10,1526-1526[SIL];x-x,1517-1517[BULt];21-22,1514-1513[UP3]	..((.((((((((.((((((((.&.)))))))).))))))))-))..	AUGUGAAAGUUGAGAAGAAUCCA&AGGAUUCUUGUUAACUUU-GCUU	0	0	NA	NA	NA	1	33.3045	4	1	Output/S8h/cleaveLand_result/t_plot/PC-3p-110122_70_XM_016108333.2_1526_TPlot.pdf	0	0	NA	NA	NA	0	33.3045	0	3.4347e-15	7.86611e-15	yes	GO:0043226(organelle);GO:0044464(cell part);GO:0016853(isomerase activity);GO:0044260(cellular macromolecule metabolic process);GO:0008152(metabolic process);GO:0018193(peptidyl-amino acid modification);GO:0000209(protein polyubiquitination);GO:0016740(transferase activity);GO:0006807(nitrogen compound metabolic process);GO:0043170(macromolecule metabolic process);GO:0043412(macromolecule modific…	ko04120(Ubiquitin mediated proteolysis)
PC-3p-110122_70	XM_016109110.2	637	658	649	-32.1	-22.1	0.688474	9	2-8,657-651;10-22,649-637	1-1,658-658[UP5];9-9,650-650[SIL]	(((((((((((((.(((((((.&.))))))).)))))))))))))	AGGCAAGGUUGGCCAGAGUUUG&AGGAUUCUUGUUAACUUUGCUU	0	0	NA	NA	NA	0	0	NA	NA	NA	1	26.8255	4	0.999989	Output/S24h/cleaveLand_result/t_plot/PC-3p-110122_70_XM_016109110.2_649_TPlot.pdf	0	0	26.8255	2.2374e-12	2.55455e-12	yes	GO:0044238(primary metabolic process);GO:0008171(O-methyltransferase activity);GO:0044237(cellular metabolic process);GO:0016740(transferase activity);GO:0008757(S-adenosylmethionine-dependent methyltransferase activity);GO:0006464(cellular protein modification process);GO:0016741(transferase activity, transferring one-carbon groups);GO:0010340(carboxyl-O-methyltransferase activity);GO:0008152(me…	NA
PC-3p-110122_70	XM_016109136.2	1097	1117	1108	-32.1	-25.1	0.781931	4	1-13,1117-1105;15-18,1104-1101;20-22,1099-1097	14-14,x-x[BULq];19-19,1100-1100[SIL]	(((.((((-(((((((((((((&))))))))))))).)))).)))	GAGGGAAG-UAGCAAGAAUCCU&AGGAUUCUUGUUAACUUUGCUU	0	0	NA	NA	NA	1	33.3045	4	0.544844	Output/S8h/cleaveLand_result/t_plot/PC-3p-110122_70_XM_016109136.2_1108_TPlot.pdf	0	0	NA	NA	NA	0	33.3045	0	3.4347e-15	7.86611e-15	yes	GO:0032555(purine ribonucleotide binding);GO:0072524(pyridine-containing compound metabolic process);GO:0043167(ion binding);GO:0046496(nicotinamide nucleotide metabolic process);GO:0055082(cellular chemical homeostasis);GO:0019637(organophosphate metabolic process);GO:0055086(nucleobase-containing small molecule metabolic process);GO:0016773(phosphotransferase activity, alcohol group as acceptor…	ko00500(Starch and sucrose metabolism);ko00052(Galactose metabolism);ko01100(Metabolic pathways);ko00051(Fructose and mannose metabolism);ko00010(Glycolysis / Gluconeogenesis);ko00520(Amino sugar and nucleotide sugar metabolism);ko01110(Biosynthesis of secondary metabolites);ko01200(Carbon metabolism)
PC-3p-110122_70	XM_016110039.2	2559	2580	2571	-32.1	-21	0.654206	8.5	1-2,2580-2579;4-12,2577-2569;15-21,2566-2560	3-3,2578-2578[SIL];13-14,2568-2567[SIL];22-22,2559-2559[UP3]	.(((((((..(((((((((.((&)).)))))))))..))))))).	UGGUGAAGGAGGCAAGAAUGCU&AGGAUUCUUGUUAACUUUGCUU	1	30.281	4	1	Output/S0h/cleaveLand_result/t_plot/PC-3p-110122_70_XM_016110039.2_2571_TPlot.pdf	0	0	NA	NA	NA	2	53.6509	2	0.999948	Output/S24h/cleaveLand_result/t_plot/PC-3p-110122_70_XM_016110039.2_2571_TPlot.pdf	30.281	0	53.6509	5.8531e-12	6.61749e-12	yes	GO:0005488(binding);GO:0046872(metal ion binding);GO:0010556(regulation of macromolecule biosynthetic process);GO:1903506(regulation of nucleic acid-templated transcription);GO:0060255(regulation of macromolecule metabolic process);GO:0031323(regulation of cellular metabolic process);GO:0019219(regulation of nucleobase-containing compound metabolic process);GO:0031326(regulation of cellular biosy…	NA
PC-3p-110122_70	XM_016110193.2	800	821	812	-32.1	-22.48	0.700312	9	2-15,820-807;19-21,803-801	1-1,821-821[UP5];16-18,806-804[SIL];22-22,800-800[UP3]	.(((...((((((((((((((.&.))))))))))))))...))).	UGGUUAUGUUGGCAAGAGUCCA&AGGAUUCUUGUUAACUUUGCUU	1	30.281	4	0.999681	Output/S0h/cleaveLand_result/t_plot/PC-3p-110122_70_XM_016110193.2_812_TPlot.pdf	0	0	NA	NA	NA	0	0	NA	NA	NA	30.281	0	0	7.0631e-14	1.09903e-13	yes	GO:0016020(membrane);GO:0031224(intrinsic component of membrane);GO:0044425(membrane part);GO:0016021(integral component of membrane)	NA
PC-3p-110122_70	XM_016110194.2	800	821	812	-32.1	-22.48	0.700312	9	2-15,820-807;19-21,803-801	1-1,821-821[UP5];16-18,806-804[SIL];22-22,800-800[UP3]	.(((...((((((((((((((.&.))))))))))))))...))).	UGGUUAUGUUGGCAAGAGUCCA&AGGAUUCUUGUUAACUUUGCUU	0	0	NA	NA	NA	0	0	NA	NA	NA	1	26.8255	4	0.999896	Output/S24h/cleaveLand_result/t_plot/PC-3p-110122_70_XM_016110194.2_812_TPlot.pdf	0	0	26.8255	2.2374e-12	2.55455e-12	yes	GO:0016020(membrane);GO:0031224(intrinsic component of membrane);GO:0044425(membrane part);GO:0016021(integral component of membrane)	NA
PC-3p-110122_70	XM_016111434.2	778	806	797	-32.1	-22.8	0.71028	18	2-4,805-803;6-12,801-795;13-22,787-778	1-1,806-806[UP5];5-5,802-802[SIL];x-x,794-788[BULt]	((((((((((.......(((((((.(((.&.))).)))))))-------))))))))))	AAGCAAAGUUGGCUGAGGACAAGAUUCCA&AGGAUUCUUGUU-------AACUUUGCUU	1	30.281	4	0.998003	Output/S0h/cleaveLand_result/t_plot/PC-3p-110122_70_XM_016111434.2_797_TPlot.pdf	1	33.3045	4	0.997299	Output/S8h/cleaveLand_result/t_plot/PC-3p-110122_70_XM_016111434.2_797_TPlot.pdf	1	26.8255	4	0.999111	Output/S24h/cleaveLand_result/t_plot/PC-3p-110122_70_XM_016111434.2_797_TPlot.pdf	30.281	33.3045	26.8255	0.70557	0.70557	yes	GO:0034641(cellular nitrogen compound metabolic process);GO:0097159(organic cyclic compound binding);GO:0043229(intracellular organelle);GO:0031428(box C/D snoRNP complex);GO:0044422(organelle part);GO:0044260(cellular macromolecule metabolic process);GO:0044452(nucleolar part);GO:0030515(snoRNA binding);GO:0005732(small nucleolar ribonucleoprotein complex);GO:0034660(ncRNA metabolic process);GO:…	ko03008(Ribosome biogenesis in eukaryotes)
PC-3p-110122_70	XM_016111589.2	857	878	870	-32.1	-21.2	0.660436	8.5	1-3,878-876;5-9,875-871;11-14,869-866;15-22,864-857	4-4,x-x[BULq];10-10,870-870[SIL];x-x,865-865[BULt]	((((((((.((((.(((((-(((&))).))))).))))-))))))))	GAGCAAAGUUUGAGGAGGA-CCU&AGGAUUCUUGUUAA-CUUUGCUU	0	0	NA	NA	NA	0	0	NA	NA	NA	2	53.6509	3	0.909529	Output/S24h/cleaveLand_result/t_plot/PC-3p-110122_70_XM_016111589.2_870_TPlot.pdf	0	0	53.6509	5.0035e-24	2.27989e-23	yes	GO:1901265(nucleoside phosphate binding);GO:0008152(metabolic process);GO:0016491(oxidoreductase activity);GO:0036094(small molecule binding);GO:0005488(binding);GO:0003824(catalytic activity);GO:0097159(organic cyclic compound binding);GO:0048037(cofactor binding);GO:0055114(oxidation-reduction process);GO:0000166(nucleotide binding);GO:0016614(oxidoreductase activity, acting on CH-OH group of d…	ko01200(Carbon metabolism);ko00630(Glyoxylate and dicarboxylate metabolism);ko01100(Metabolic pathways)
PC-3p-110122_70	XM_016111590.2	955	976	968	-32.1	-21.2	0.660436	8.5	1-3,976-974;5-9,973-969;11-14,967-964;15-22,962-955	4-4,x-x[BULq];10-10,968-968[SIL];x-x,963-963[BULt]	((((((((.((((.(((((-(((&))).))))).))))-))))))))	GAGCAAAGUUUGAGGAGGA-CCU&AGGAUUCUUGUUAA-CUUUGCUU	0	0	NA	NA	NA	1	33.3045	4	1	Output/S8h/cleaveLand_result/t_plot/PC-3p-110122_70_XM_016111590.2_968_TPlot.pdf	3	80.4764	3	0.906527	Output/S24h/cleaveLand_result/t_plot/PC-3p-110122_70_XM_016111590.2_968_TPlot.pdf	0	33.3045	80.4764	1.8863e-19	7.85498e-19	yes	GO:1901265(nucleoside phosphate binding);GO:0008152(metabolic process);GO:0016491(oxidoreductase activity);GO:0036094(small molecule binding);GO:0005488(binding);GO:0003824(catalytic activity);GO:0097159(organic cyclic compound binding);GO:0048037(cofactor binding);GO:0055114(oxidation-reduction process);GO:0000166(nucleotide binding);GO:0016614(oxidoreductase activity, acting on CH-OH group of d…	ko01200(Carbon metabolism);ko00630(Glyoxylate and dicarboxylate metabolism);ko01100(Metabolic pathways)
PC-3p-110122_70	XM_016111734.2	3180	3201	3192	-32.1	-28.6	0.890966	4	1-12,3201-3190;15-22,3187-3180	13-14,3189-3188[SIL]	((((((((..((((((((((((&))))))))))))..))))))))	GGGCAAAGGCAGCAAGAAUCCU&AGGAUUCUUGUUAACUUUGCUU	0	0	NA	NA	NA	1	33.3045	4	0.0815735	Output/S8h/cleaveLand_result/t_plot/PC-3p-110122_70_XM_016111734.2_3192_TPlot.pdf	0	0	NA	NA	NA	0	33.3045	0	3.4347e-15	7.86611e-15	yes	GO:0005622(intracellular);GO:0007154(cell communication);GO:0044464(cell part);GO:0051345(positive regulation of hydrolase activity);GO:0043085(positive regulation of catalytic activity);GO:0050896(response to stimulus);GO:0065007(biological regulation);GO:0050794(regulation of cellular process);GO:0005623(cell);GO:0007264(small GTPase mediated signal transduction);GO:0065009(regulation of molecu…	NA
PC-3p-110122_70	XM_016112239.1	1752	1774	1764	-32.1	-22.5	0.700935	8	1-8,1774-1767;9-21,1765-1753	x-x,1766-1766[BULt];22-22,1752-1752[UP3]	.(((((((((((((.((((((((&))))))))-))))))))))))).	CAGUGAAGUUGACAGGGGAUCUU&AGGAUUCU-UGUUAACUUUGCUU	0	0	NA	NA	NA	0	0	NA	NA	NA	1	26.8255	4	0.999848	Output/S24h/cleaveLand_result/t_plot/PC-3p-110122_70_XM_016112239.1_1764_TPlot.pdf	0	0	26.8255	2.2374e-12	2.55455e-12	yes	GO:0042651(thylakoid membrane);GO:0016020(membrane);GO:0042221(response to chemical);GO:0044436(thylakoid part);GO:0006950(response to stress);GO:0000304(response to singlet oxygen);GO:0005623(cell);GO:0009579(thylakoid);GO:1901700(response to oxygen-containing compound);GO:0044464(cell part);GO:0050896(response to stimulus);GO:0044424(intracellular part);GO:0000302(response to reactive oxygen sp…	ko03018(RNA degradation)
PC-3p-110122_70	XM_016112623.2	1903	1929	1917	-32.1	-21.1	0.657321	10	2-6,1928-1924;7-16,1920-1911;17-22,1908-1903	1-1,1929-1929[UP5];x-x,1923-1921[BULt];x-x,1910-1909[BULt]	((((((..((((((((((...(((((.&.)))))---))))))))))--))))))	AAGCAACCAGUUAACAGGUGAAAUCCC&AGGAUU---CUUGUUAACU--UUGCUU	1	30.281	4	1	Output/S0h/cleaveLand_result/t_plot/PC-3p-110122_70_XM_016112623.2_1917_TPlot.pdf	0	0	NA	NA	NA	0	0	NA	NA	NA	30.281	0	0	7.0631e-14	1.09903e-13	yes	GO:0016772(transferase activity, transferring phosphorus-containing groups);GO:0016310(phosphorylation);GO:0016021(integral component of membrane);GO:0044425(membrane part);GO:1901265(nucleoside phosphate binding);GO:0019538(protein metabolic process);GO:0003824(catalytic activity);GO:0032555(purine ribonucleotide binding);GO:0016773(phosphotransferase activity, alcohol group as acceptor);GO:1901…	NA
PC-3p-110122_70	XM_016113004.2	504	527	518	-32.1	-22.2	0.691589	6	1-9,527-519;11-14,517-514;15-19,512-508;20-22,506-504	10-10,518-518[SIL];x-x,513-513[BULt];x-x,507-507[BULt]	(((.(((((.((((.(((((((((&))))))))).))))-)))))-)))	GAGUCAGAGAUUAAGAAGGAUCCU&AGGAUUCUUGUUAA-CUUUG-CUU	1	30.281	4	0.999933	Output/S0h/cleaveLand_result/t_plot/PC-3p-110122_70_XM_016113004.2_518_TPlot.pdf	0	0	NA	NA	NA	3	80.4764	2	0.977078	Output/S24h/cleaveLand_result/t_plot/PC-3p-110122_70_XM_016113004.2_518_TPlot.pdf	30.281	0	80.4764	3.6664e-20	1.56643e-19	yes	GO:0005623(cell);GO:0044464(cell part);GO:0016020(membrane)	ko03060(Protein export)
PC-3p-110122_70	XM_016113208.2	307	328	319	-32.1	-26.4	0.82243	6	2-4,327-325;7-22,322-307	1-1,328-328[UP5];5-6,324-323[SIL]	((((((((((((((((..(((.&.)))..))))))))))))))))	GAGCAAGGUUAACAAGCCUCCG&AGGAUUCUUGUUAACUUUGCUU	6	181.686	2	0.161924	Output/S0h/cleaveLand_result/t_plot/PC-3p-110122_70_XM_016113208.2_319_TPlot.pdf	1	33.3045	4	0.386937	Output/S8h/cleaveLand_result/t_plot/PC-3p-110122_70_XM_016113208.2_319_TPlot.pdf	4	107.302	2	0.182867	Output/S24h/cleaveLand_result/t_plot/PC-3p-110122_70_XM_016113208.2_319_TPlot.pdf	181.686	33.3045	107.302	5.5751e-23	2.51241e-22	yes	GO:0009058(biosynthetic process);GO:0009987(cellular process);GO:0006518(peptide metabolic process);GO:0043603(cellular amide metabolic process);GO:0010467(gene expression);GO:1901564(organonitrogen compound metabolic process);GO:0043228(non-membrane-bounded organelle);GO:0030529(intracellular ribonucleoprotein complex);GO:0044237(cellular metabolic process);GO:0032991(macromolecular complex);GO:…	ko03010(Ribosome)
PC-3p-110122_70	XM_016113373.2	2364	2395	2376	-32.1	-22.7	0.707165	25	1-8,2395-2388;9-22,2377-2364	x-x,2387-2378[BULt]	((((((((((((((..........((((((((&))))))))----------))))))))))))))	AAGUAAGGUUGGCAAACUUGGGAAGGAGUCCU&AGGAUUCU----------UGUUAACUUUGCUU	1	30.281	4	0.998779	Output/S0h/cleaveLand_result/t_plot/PC-3p-110122_70_XM_016113373.2_2376_TPlot.pdf	0	0	NA	NA	NA	0	0	NA	NA	NA	30.281	0	0	7.0631e-14	1.09903e-13	yes	GO:0044464(cell part);GO:0006810(transport);GO:0022857(transmembrane transporter activity);GO:0051179(localization);GO:0015103(inorganic anion transmembrane transporter activity);GO:0055085(transmembrane transport);GO:0055080(cation homeostasis);GO:0016020(membrane);GO:0005887(integral component of plasma membrane);GO:0042592(homeostatic process);GO:0031226(intrinsic component of plasma membrane)…	NA
PC-3p-110122_70	XM_016113492.2	1079	1101	1092	-32.1	-22.4	0.697819	8	1-11,1101-1091;12-15,1088-1085;18-22,1083-1079	x-x,1090-1089[BULt];16-17,1084-1084[AILq]	(((((.-((((..(((((((((((&)))))))))))--))))..)))))	AAGCAU-GUUGGAGCAAGAAUCCU&AGGAUUCUUGU--UAACUUUGCUU	2	60.562	2	0.946809	Output/S0h/cleaveLand_result/t_plot/PC-3p-110122_70_XM_016113492.2_1092_TPlot.pdf	0	0	NA	NA	NA	0	0	NA	NA	NA	60.562	0	0	4.9856e-27	3.03728e-26	yes	GO:1901575(organic substance catabolic process);GO:0004553(hydrolase activity, hydrolyzing O-glycosyl compounds);GO:0008810(cellulase activity);GO:0005975(carbohydrate metabolic process);GO:0000272(polysaccharide catabolic process);GO:0009057(macromolecule catabolic process);GO:0009251(glucan catabolic process);GO:0044248(cellular catabolic process);GO:0009987(cellular process);GO:0044247(cellula…	ko01100(Metabolic pathways);ko00500(Starch and sucrose metabolism)
PC-3p-110122_70	XM_016113979.2	1138	1160	1150	-32.1	-26	0.809969	6	2-9,1159-1152;10-21,1150-1139	1-1,1160-1160[UP5];x-x,1151-1151[BULt];22-22,1138-1138[UP3]	.((((((((((((.((((((((.&.))))))))-)))))))))))).	UGGCAGAGUUAAUGAAGAAUCCA&AGGAUUCUU-GUUAACUUUGCUU	1	30.281	4	0.488703	Output/S0h/cleaveLand_result/t_plot/PC-3p-110122_70_XM_016113979.2_1150_TPlot.pdf	0	0	NA	NA	NA	0	0	NA	NA	NA	30.281	0	0	7.0631e-14	1.09903e-13	yes	GO:0055114(oxidation-reduction process);GO:0016020(membrane);GO:0044550(secondary metabolite biosynthetic process);GO:1901363(heterocyclic compound binding);GO:0046906(tetrapyrrole binding);GO:0016709(oxidoreductase activity, acting on paired donors, with incorporation or reduction of molecular oxygen, NAD(P)H as one donor, and incorporation of one atom of oxygen);GO:0046872(metal ion binding);GO…	ko01100(Metabolic pathways);ko00943(Isoflavonoid biosynthesis)
PC-3p-110122_70	XM_016115839.2	883	903	894	-32.1	-21.7	0.676012	9	2-9,902-895;11-12,893-892;15-22,890-883	1-1,903-903[UP5];10-10,894-894[SIL];13-14,891-891[AILq]	((((((((.-((.((((((((.&.)))))))).))..))))))))	AGGCGAAGG-AAGGGGAGUCCG&AGGAUUCUUGUUAACUUUGCUU	0	0	NA	NA	NA	0	0	NA	NA	NA	3	80.4764	2	0.996736	Output/S24h/cleaveLand_result/t_plot/PC-3p-110122_70_XM_016115839.2_894_TPlot.pdf	0	0	80.4764	1.1184e-35	1.47636e-34	yes	NA	NA
PC-3p-110122_70	XM_016116247.2	616	638	629	-32.1	-21.4	0.666667	10	4-16,635-623;17-22,621-616	1-3,638-636[UP5];x-x,622-622[BULt]	((((((.(((((((((((((...&...)))))))))))))-))))))	AGGCAGAAGUUGACGAGGAUAAA&AGGAUUCUUGUUAACU-UUGCUU	2	60.562	3	0.837365	Output/S0h/cleaveLand_result/t_plot/PC-3p-110122_70_XM_016116247.2_629_TPlot.pdf	0	0	NA	NA	NA	0	0	NA	NA	NA	60.562	0	0	4.9856e-27	3.03728e-26	yes	NA	NA
PC-3p-110122_70	XM_016116924.2	2501	2522	2512	-32.1	-21.5	0.669782	7.5	1-6,2522-2517;7-13,2515-2509;15-22,2508-2501	x-x,2516-2516[BULt];14-14,x-x[BULq]	((((((((-(((((((.((((((&))))))-))))))).))))))))	GGGCAGAG-UAAUGAGAAGUCCU&AGGAUU-CUUGUUAACUUUGCUU	0	0	NA	NA	NA	0	0	NA	NA	NA	1	26.8255	4	1	Output/S24h/cleaveLand_result/t_plot/PC-3p-110122_70_XM_016116924.2_2512_TPlot.pdf	0	0	26.8255	2.2374e-12	2.55455e-12	yes	NA	NA
PC-3p-110122_70	XM_016117788.2	452	474	465	-32.1	-23.9	0.744548	9	2-4,473-471;6-19,469-456;20-22,454-452	1-1,474-474[UP5];5-5,470-470[SIL];x-x,455-455[BULt]	(((.((((((((((((((.(((.&.))).))))))))))))))-)))	GAGACAGAGUUGGCGAGGCUCCA&AGGAUUCUUGUUAACUUUG-CUU	3	90.843	2	0.51045	Output/S0h/cleaveLand_result/t_plot/PC-3p-110122_70_XM_016117788.2_465_TPlot.pdf	2	66.6089	3	0.172882	Output/S8h/cleaveLand_result/t_plot/PC-3p-110122_70_XM_016117788.2_465_TPlot.pdf	3	80.4764	2	0.558065	Output/S24h/cleaveLand_result/t_plot/PC-3p-110122_70_XM_016117788.2_465_TPlot.pdf	90.843	66.6089	80.4764	0.15501	0.156392	yes	GO:0016020(membrane)	NA
PC-3p-110122_70	XM_016117789.2	491	513	504	-32.1	-23.9	0.744548	9	2-4,512-510;6-19,508-495;20-22,493-491	1-1,513-513[UP5];5-5,509-509[SIL];x-x,494-494[BULt]	(((.((((((((((((((.(((.&.))).))))))))))))))-)))	GAGACAGAGUUGGCGAGGCUCCA&AGGAUUCUUGUUAACUUUG-CUU	4	121.124	2	0.502872	Output/S0h/cleaveLand_result/t_plot/PC-3p-110122_70_XM_016117789.2_504_TPlot.pdf	0	0	NA	NA	NA	0	0	NA	NA	NA	121.124	0	0	2.4796e-53	9.49387e-52	yes	GO:0016020(membrane)	NA
PC-3p-110122_70	XM_021128237.1	1692	1719	1710	-32.1	-21.3	0.663551	9.5	2-12,1718-1708;14-16,1706-1704;17-22,1697-1692	1-1,1719-1719[UP5];13-13,1707-1707[SIL];x-x,1703-1698[BULt]	((((((......(((.(((((((((((.&.))))))))))).)))------))))))	AAGCAAGAAAACGGUAAACAAGGAUCCC&AGGAUUCUUGUUAACU------UUGCUU	1	30.281	4	1	Output/S0h/cleaveLand_result/t_plot/PC-3p-110122_70_XM_021128237.1_1710_TPlot.pdf	0	0	NA	NA	NA	0	0	NA	NA	NA	30.281	0	0	7.0631e-14	1.09903e-13	yes	GO:0043229(intracellular organelle);GO:0090304(nucleic acid metabolic process);GO:0034645(cellular macromolecule biosynthetic process);GO:0006259(DNA metabolic process);GO:0044249(cellular biosynthetic process);GO:0009059(macromolecule biosynthetic process);GO:0005623(cell);GO:0071704(organic substance metabolic process);GO:1901360(organic cyclic compound metabolic process);GO:0006139(nucleobase-…	ko03410(Base excision repair);ko00240(Pyrimidine metabolism);ko03030(DNA replication);ko03430(Mismatch repair);ko01100(Metabolic pathways);ko03440(Homologous recombination);ko03420(Nucleotide excision repair);ko00230(Purine metabolism)
PC-3p-110122_70	XM_021128836.1	2117	2141	2132	-32.1	-21.2	0.660436	10.5	2-17,2140-2125;18-21,2121-2118	1-1,2141-2141[UP5];x-x,2124-2122[BULt];22-22,2117-2117[UP3]	.((((...((((((((((((((((.&.))))))))))))))))---)))).	UAGUACUGGGGUUGGCAAGAGUCUC&AGGAUUCUUGUUAACUU---UGCUU	1	30.281	4	1	Output/S0h/cleaveLand_result/t_plot/PC-3p-110122_70_XM_021128836.1_2132_TPlot.pdf	0	0	NA	NA	NA	0	0	NA	NA	NA	30.281	0	0	7.0631e-14	1.09903e-13	yes	GO:2000112(regulation of cellular macromolecule biosynthetic process);GO:0044464(cell part);GO:0051246(regulation of protein metabolic process);GO:0044248(cellular catabolic process);GO:0043228(non-membrane-bounded organelle);GO:0005737(cytoplasm);GO:0019439(aromatic compound catabolic process);GO:0006139(nucleobase-containing compound metabolic process);GO:0043170(macromolecule metabolic process…	ko03018(RNA degradation)
PC-3p-110122_70	XM_021129987.1	798	820	811	-32.1	-21	0.654206	7	2-7,819-814;9-12,812-809;15-15,806-806;16-22,804-798	1-1,820-820[UP5];8-8,813-813[SIL];13-14,808-807[SIL];x-x,805-805[BULt]	(((((((.(..((((.((((((.&.)))))).))))..)-)))))))	AAGCAAAUGGUGACAUGAAUCCA&AGGAUUCUUGUUAAC-UUUGCUU	1	30.281	4	1	Output/S0h/cleaveLand_result/t_plot/PC-3p-110122_70_XM_021129987.1_811_TPlot.pdf	0	0	NA	NA	NA	0	0	NA	NA	NA	30.281	0	0	7.0631e-14	1.09903e-13	yes	NA	NA
PC-3p-110122_70	XM_021129999.1	2152	2171	2162	-32.1	-21.4	0.666667	7.5	2-16,2170-2156;19-21,2155-2153	1-1,2171-2171[UP5];17-18,x-x[BULq];22-22,2152-2152[UP3]	.(((--(((((((((((((((.&.)))))))))))))))..))).	UAGU--AGUUAACGGGGAUCCA&AGGAUUCUUGUUAACUUUGCUU	0	0	NA	NA	NA	0	0	NA	NA	NA	1	26.8255	4	1	Output/S24h/cleaveLand_result/t_plot/PC-3p-110122_70_XM_021129999.1_2162_TPlot.pdf	0	0	26.8255	2.2374e-12	2.55455e-12	yes	NA	ko03013(RNA transport)
PC-3p-110122_70	XM_021131353.1	1241	1263	1254	-32.1	-23.2	0.722741	4.5	1-14,1263-1250;15-22,1248-1241	x-x,1249-1249[BULt]	((((((((.((((((((((((((&))))))))))))))-))))))))	AAGCAAGGAUUAACAAGGAUUUU&AGGAUUCUUGUUAA-CUUUGCUU	2	60.562	2	0.788053	Output/S0h/cleaveLand_result/t_plot/PC-3p-110122_70_XM_021131353.1_1254_TPlot.pdf	0	0	NA	NA	NA	0	0	NA	NA	NA	60.562	0	0	4.9856e-27	3.03728e-26	yes	GO:0006518(peptide metabolic process);GO:0016875(ligase activity, forming carbon-oxygen bonds);GO:0043043(peptide biosynthetic process);GO:0036094(small molecule binding);GO:0044249(cellular biosynthetic process);GO:0043168(anion binding);GO:0009058(biosynthetic process);GO:0043038(amino acid activation);GO:0044281(small molecule metabolic process);GO:1901576(organic substance biosynthetic proces…	ko00970(Aminoacyl-tRNA biosynthesis)
PC-3p-110122_70	XM_021131738.1	751	771	763	-32.1	-21.2	0.660436	8	2-9,770-763;11-21,762-752	1-1,771-771[UP5];10-10,x-x[BULq];22-22,751-751[UP3]	.(((((((((((-((((((((.&.)))))))).))))))))))).	UGGCAAGGUUAG-AAGGAUCUC&AGGAUUCUUGUUAACUUUGCUU	0	0	NA	NA	NA	0	0	NA	NA	NA	1	26.8255	4	1	Output/S24h/cleaveLand_result/t_plot/PC-3p-110122_70_XM_021131738.1_763_TPlot.pdf	0	0	26.8255	2.2374e-12	2.55455e-12	yes	NA	NA
PC-3p-110122_70	XM_021131963.1	2152	2174	2164	-32.1	-22.7	0.707165	8.5	2-3,2173-2172;4-19,2170-2155	1-1,2174-2174[UP5];x-x,2171-2171[BULt];20-22,2154-2152[UP3]	...((((((((((((((((.((.&.))-))))))))))))))))...	UACCAGAGUUGGCAAGAAUGCCA&AGG-AUUCUUGUUAACUUUGCUU	2	60.562	2	0.897823	Output/S0h/cleaveLand_result/t_plot/PC-3p-110122_70_XM_021131963.1_2164_TPlot.pdf	1	33.3045	4	0.998197	Output/S8h/cleaveLand_result/t_plot/PC-3p-110122_70_XM_021131963.1_2164_TPlot.pdf	0	0	NA	NA	NA	60.562	33.3045	0	1.6983e-13	2.61781e-13	yes	GO:0030522(intracellular receptor signaling pathway);GO:0060089(molecular transducer activity);GO:0065007(biological regulation);GO:0004872(receptor activity);GO:0003904(deoxyribodipyrimidine photo-lyase activity);GO:0071483(cellular response to blue light);GO:0071214(cellular response to abiotic stimulus);GO:0016830(carbon-carbon lyase activity);GO:0004871(signal transducer activity);GO:0009314(…	ko04712(Circadian rhythm - plant)
PC-3p-110122_70	XM_021132260.1	1327	1347	1339	-32.1	-22.8	0.71028	10.5	2-8,1346-1340;11-21,1338-1328	1-1,1347-1347[UP5];9-10,1339-1339[AILq];22-22,1327-1327[UP3]	.(((((((((((.-(((((((.&.)))))))..))))))))))).	UGGCGAGGUUGAG-GGAGUCCC&AGGAUUCUUGUUAACUUUGCUU	0	0	NA	NA	NA	1	33.3045	4	0.997411	Output/S8h/cleaveLand_result/t_plot/PC-3p-110122_70_XM_021132260.1_1339_TPlot.pdf	0	0	NA	NA	NA	0	33.3045	0	3.4347e-15	7.86611e-15	yes	GO:0003677(DNA binding);GO:0009987(cellular process);GO:0051301(cell division);GO:0097159(organic cyclic compound binding);GO:0003676(nucleic acid binding);GO:1901363(heterocyclic compound binding);GO:0005488(binding)	ko03040(Spliceosome)
PC-3p-110122_70	XM_021133746.1	549	568	559	-32.1	-21.7	0.676012	6.5	2-12,567-557;15-22,556-549	1-1,568-568[UP5];13-14,x-x[BULq]	((((((((--(((((((((((.&.)))))))))))..))))))))	AAGCAAGG--GGCAAGAAUUCA&AGGAUUCUUGUUAACUUUGCUU	0	0	NA	NA	NA	0	0	NA	NA	NA	1	26.8255	4	1	Output/S24h/cleaveLand_result/t_plot/PC-3p-110122_70_XM_021133746.1_559_TPlot.pdf	0	0	26.8255	2.2374e-12	2.55455e-12	yes	GO:0006399(tRNA metabolic process);GO:0019239(deaminase activity);GO:0043229(intracellular organelle);GO:0034470(ncRNA processing);GO:0044464(cell part);GO:0006725(cellular aromatic compound metabolic process);GO:0006807(nitrogen compound metabolic process);GO:0008033(tRNA processing);GO:0009451(RNA modification);GO:0006400(tRNA modification);GO:0044238(primary metabolic process);GO:0043231(intra…	NA
PC-3p-110122_70	XM_021134920.1	564	587	578	-32.1	-21.2	0.660436	9.5	1-12,587-576;13-15,572-570;18-22,568-564	x-x,575-573[BULt];16-17,569-569[AILq]	(((((.-(((...((((((((((((&))))))))))))---)))..)))))	AGGCAU-GUUUGGAACAAGGAUCCU&AGGAUUCUUGUU---AACUUUGCUU	0	0	NA	NA	NA	0	0	NA	NA	NA	1	26.8255	4	1	Output/S24h/cleaveLand_result/t_plot/PC-3p-110122_70_XM_021134920.1_578_TPlot.pdf	0	0	26.8255	2.2374e-12	2.55455e-12	yes	NA	ko04626(Plant-pathogen interaction)
PC-3p-110122_70	XM_021139641.1	459	480	471	-32.1	-26.6	0.82866	7.5	1-1,480-480;3-22,478-459	2-2,479-479[SIL]	((((((((((((((((((((.(&).))))))))))))))))))))	GAGCAGGGUUGGCAAGGAUUGU&AGGAUUCUUGUUAACUUUGCUU	0	0	NA	NA	NA	1	33.3045	4	0.346535	Output/S8h/cleaveLand_result/t_plot/PC-3p-110122_70_XM_021139641.1_471_TPlot.pdf	0	0	NA	NA	NA	0	33.3045	0	3.4347e-15	7.86611e-15	yes	GO:0034641(cellular nitrogen compound metabolic process);GO:0009058(biosynthetic process);GO:0010467(gene expression);GO:0006412(translation);GO:0044425(membrane part);GO:0051234(establishment of localization);GO:0006807(nitrogen compound metabolic process);GO:0006810(transport);GO:0006518(peptide metabolic process);GO:0044238(primary metabolic process);GO:0071704(organic substance metabolic proc…	NA
PC-3p-110122_70	XM_021139784.1	667	690	679	-32.1	-26	0.809969	6.5	1-3,690-688;4-21,685-668	x-x,687-686[BULt];22-22,667-667[UP3]	.((((((((((((((((((..(((&)))--)))))))))))))))))).	CGGCGAGGUUAACAAGAAUGACCU&AGG--AUUCUUGUUAACUUUGCUU	0	0	NA	NA	NA	2	66.6089	2	0.189935	Output/S8h/cleaveLand_result/t_plot/PC-3p-110122_70_XM_021139784.1_679_TPlot.pdf	1	26.8255	4	0.51945	Output/S24h/cleaveLand_result/t_plot/PC-3p-110122_70_XM_021139784.1_679_TPlot.pdf	0	66.6089	26.8255	2.1751e-16	8.57352e-16	yes	GO:0043492(ATPase activity, coupled to movement of substances);GO:0043229(intracellular organelle);GO:0051234(establishment of localization);GO:0017111(nucleoside-triphosphatase activity);GO:0042623(ATPase activity, coupled);GO:0043231(intracellular membrane-bounded organelle);GO:0044422(organelle part);GO:0098805(whole membrane);GO:0044437(vacuolar part);GO:0044464(cell part);GO:0005773(vacuole)…	ko04145(Phagosome);ko01100(Metabolic pathways);ko00190(Oxidative phosphorylation)
PC-3p-110122_70	XM_021141082.1	821	843	833	-32.1	-22.3	0.694704	9.5	2-2,842-842;5-22,838-821	1-1,843-843[UP5];3-4,841-839[AILt]	((((((((((((((((((...(.&.)-..))))))))))))))))))	GAGUGAAGUUGACAAGAAGCACA&AG-GAUUCUUGUUAACUUUGCUU	0	0	NA	NA	NA	1	33.3045	4	0.999844	Output/S8h/cleaveLand_result/t_plot/PC-3p-110122_70_XM_021141082.1_833_TPlot.pdf	1	26.8255	4	0.99997	Output/S24h/cleaveLand_result/t_plot/PC-3p-110122_70_XM_021141082.1_833_TPlot.pdf	0	33.3045	26.8255	1.7537e-07	1.85914e-07	yes	GO:0043933(macromolecular complex subunit organization);GO:0044464(cell part);GO:0006461(protein complex assembly);GO:0022607(cellular component assembly);GO:0009987(cellular process);GO:0005829(cytosol);GO:0071840(cellular component organization or biogenesis);GO:0044424(intracellular part);GO:0005622(intracellular);GO:0044085(cellular component biogenesis);GO:0034622(cellular macromolecular com…	NA
PC-3p-110122_70	XM_021141083.1	821	843	833	-32.1	-22.3	0.694704	9.5	2-2,842-842;5-22,838-821	1-1,843-843[UP5];3-4,841-839[AILt]	((((((((((((((((((...(.&.)-..))))))))))))))))))	GAGUGAAGUUGACAAGAAGCACA&AG-GAUUCUUGUUAACUUUGCUU	1	30.281	4	0.999888	Output/S0h/cleaveLand_result/t_plot/PC-3p-110122_70_XM_021141083.1_833_TPlot.pdf	0	0	NA	NA	NA	0	0	NA	NA	NA	30.281	0	0	7.0631e-14	1.09903e-13	yes	GO:0043933(macromolecular complex subunit organization);GO:0044464(cell part);GO:0006461(protein complex assembly);GO:0022607(cellular component assembly);GO:0009987(cellular process);GO:0005829(cytosol);GO:0071840(cellular component organization or biogenesis);GO:0044424(intracellular part);GO:0005622(intracellular);GO:0044085(cellular component biogenesis);GO:0034622(cellular macromolecular com…	NA
PC-3p-110122_70	XM_021141084.1	821	843	833	-32.1	-22.3	0.694704	9.5	2-2,842-842;5-22,838-821	1-1,843-843[UP5];3-4,841-839[AILt]	((((((((((((((((((...(.&.)-..))))))))))))))))))	GAGUGAAGUUGACAAGAAGCACA&AG-GAUUCUUGUUAACUUUGCUU	0	0	NA	NA	NA	1	33.3045	4	0.99983	Output/S8h/cleaveLand_result/t_plot/PC-3p-110122_70_XM_021141084.1_833_TPlot.pdf	0	0	NA	NA	NA	0	33.3045	0	3.4347e-15	7.86611e-15	yes	GO:0043933(macromolecular complex subunit organization);GO:0044464(cell part);GO:0006461(protein complex assembly);GO:0022607(cellular component assembly);GO:0009987(cellular process);GO:0005829(cytosol);GO:0071840(cellular component organization or biogenesis);GO:0044424(intracellular part);GO:0005622(intracellular);GO:0044085(cellular component biogenesis);GO:0034622(cellular macromolecular com…	NA
PC-3p-110122_70	XM_021141085.1	821	843	833	-32.1	-22.3	0.694704	9.5	2-2,842-842;5-22,838-821	1-1,843-843[UP5];3-4,841-839[AILt]	((((((((((((((((((...(.&.)-..))))))))))))))))))	GAGUGAAGUUGACAAGAAGCACA&AG-GAUUCUUGUUAACUUUGCUU	1	30.281	4	0.999881	Output/S0h/cleaveLand_result/t_plot/PC-3p-110122_70_XM_021141085.1_833_TPlot.pdf	0	0	NA	NA	NA	0	0	NA	NA	NA	30.281	0	0	7.0631e-14	1.09903e-13	yes	GO:0043933(macromolecular complex subunit organization);GO:0044464(cell part);GO:0006461(protein complex assembly);GO:0022607(cellular component assembly);GO:0009987(cellular process);GO:0005829(cytosol);GO:0071840(cellular component organization or biogenesis);GO:0044424(intracellular part);GO:0005622(intracellular);GO:0044085(cellular component biogenesis);GO:0034622(cellular macromolecular com…	NA
PC-3p-110122_70	XM_021142149.1	446	470	462	-32.1	-21.8	0.679128	8	1-3,470-468;5-14,467-458;15-22,453-446	4-4,x-x[BULq];x-x,457-454[BULt]	((((((((....((((((((((-(((&))).))))))))))----))))))))	GAGCAAGGGAAUUUAGCAAGAA-CCU&AGGAUUCUUGUUAA----CUUUGCUU	0	0	NA	NA	NA	0	0	NA	NA	NA	2	53.6509	2	0.994938	Output/S24h/cleaveLand_result/t_plot/PC-3p-110122_70_XM_021142149.1_462_TPlot.pdf	0	0	53.6509	5.0035e-24	2.27989e-23	yes	GO:0043227(membrane-bounded organelle);GO:0043229(intracellular organelle);GO:0043226(organelle);GO:0016020(membrane);GO:0044464(cell part);GO:0043231(intracellular membrane-bounded organelle);GO:0044424(intracellular part);GO:0012505(endomembrane system);GO:0031224(intrinsic component of membrane);GO:0044444(cytoplasmic part);GO:0044425(membrane part);GO:0005737(cytoplasm);GO:0005794(Golgi appar…	ko00040(Pentose and glucuronate interconversions);ko01100(Metabolic pathways)
PC-3p-110122_70	XM_021142728.1	800	821	812	-32.1	-22.48	0.700312	9	2-15,820-807;19-21,803-801	1-1,821-821[UP5];16-18,806-804[SIL];22-22,800-800[UP3]	.(((...((((((((((((((.&.))))))))))))))...))).	UGGUUAUGUUGGCAAGAGUCCA&AGGAUUCUUGUUAACUUUGCUU	0	0	NA	NA	NA	0	0	NA	NA	NA	1	26.8255	4	0.999899	Output/S24h/cleaveLand_result/t_plot/PC-3p-110122_70_XM_021142728.1_812_TPlot.pdf	0	0	26.8255	2.2374e-12	2.55455e-12	yes	GO:0016020(membrane);GO:0031224(intrinsic component of membrane);GO:0044425(membrane part);GO:0016021(integral component of membrane)	NA
PC-3p-110122_70	XM_021142729.1	800	821	812	-32.1	-22.48	0.700312	9	2-15,820-807;19-21,803-801	1-1,821-821[UP5];16-18,806-804[SIL];22-22,800-800[UP3]	.(((...((((((((((((((.&.))))))))))))))...))).	UGGUUAUGUUGGCAAGAGUCCA&AGGAUUCUUGUUAACUUUGCUU	0	0	NA	NA	NA	1	33.3045	4	0.999538	Output/S8h/cleaveLand_result/t_plot/PC-3p-110122_70_XM_021142729.1_812_TPlot.pdf	2	53.6509	2	0.957987	Output/S24h/cleaveLand_result/t_plot/PC-3p-110122_70_XM_021142729.1_812_TPlot.pdf	0	33.3045	53.6509	1.0184e-11	1.14021e-11	yes	GO:0016020(membrane);GO:0031224(intrinsic component of membrane);GO:0044425(membrane part);GO:0016021(integral component of membrane)	NA
PC-3p-110122_70	XM_021143833.1	1361	1386	1377	-32.1	-22	0.685358	9	1-14,1386-1373;15-16,1371-1370;17-20,1366-1363	x-x,1372-1372[BULt];x-x,1369-1367[BULt];21-22,1362-1361[UP3]	..((((...((.((((((((((((((&))))))))))))))-))---))))..	AUGCGAACGGGAUUGACAAGGAUCCU&AGGAUUCUUGUUAA-CU---UUGCUU	1	30.281	4	0.999981	Output/S0h/cleaveLand_result/t_plot/PC-3p-110122_70_XM_021143833.1_1377_TPlot.pdf	0	0	NA	NA	NA	0	0	NA	NA	NA	30.281	0	0	7.0631e-14	1.09903e-13	yes	GO:0016875(ligase activity, forming carbon-oxygen bonds);GO:0043604(amide biosynthetic process);GO:0006520(cellular amino acid metabolic process);GO:0009058(biosynthetic process);GO:0005488(binding);GO:0032555(purine ribonucleotide binding);GO:0044260(cellular macromolecule metabolic process);GO:0044249(cellular biosynthetic process);GO:0043603(cellular amide metabolic process);GO:0006082(organic…	ko00970(Aminoacyl-tRNA biosynthesis)
PC-3p-110421_70	XM_016082081.2	724	748	739	-39	-26.4	0.676923	11.5	3-3,746-746;5-10,744-739;12-23,736-725	1-2,748-747[UP5];4-4,745-745[SIL];11-11,738-737[AILt];24-24,724-724[UP3]	.((((((((((((..((((((.(..&..).))))))-.)))))))))))).	UGUCAUCAGAUUUUUGUCACUGGGG&UACGAGUGAC-UGAAUUUGAUGACU	1	30.281	4	0.388551	Output/S0h/cleaveLand_result/t_plot/PC-3p-110421_70_XM_016082081.2_739_TPlot.pdf	0	0	NA	NA	NA	0	0	NA	NA	NA	30.281	0	0	7.0631e-14	1.09903e-13	yes	NA	NA
PC-3p-110421_70	XM_016086066.2	462	487	477	-39	-27.6	0.707692	10	4-9,484-479;10-10,477-477;11-24,475-462	1-3,487-485[UP5];x-x,478-478[BULt];x-x,476-476[BULt]	((((((((((((((.(.((((((...&...))))))-)-))))))))))))))	AGUCAUCAAAUUCAUGCUCGCUCAUU&UACGAGUGA-C-UGAAUUUGAUGACU	0	0	NA	NA	NA	1	33.3045	4	0.225301	Output/S8h/cleaveLand_result/t_plot/PC-3p-110421_70_XM_016086066.2_477_TPlot.pdf	0	0	NA	NA	NA	0	33.3045	0	3.4347e-15	7.86611e-15	yes	NA	NA
PC-3p-110421_70	XM_016086067.2	462	487	477	-39	-27.6	0.707692	10	4-9,484-479;10-10,477-477;11-24,475-462	1-3,487-485[UP5];x-x,478-478[BULt];x-x,476-476[BULt]	((((((((((((((.(.((((((...&...))))))-)-))))))))))))))	AGUCAUCAAAUUCAUGCUCGCUCAUU&UACGAGUGA-C-UGAAUUUGAUGACU	0	0	NA	NA	NA	2	66.6089	2	0.0767896	Output/S8h/cleaveLand_result/t_plot/PC-3p-110421_70_XM_016086067.2_477_TPlot.pdf	0	0	NA	NA	NA	0	66.6089	0	1.1789e-29	9.89421e-29	yes	NA	NA
PC-3p-110421_70	XM_016092291.2	809	837	828	-39	-25.8	0.661538	14	3-11,835-827;12-17,822-817;18-23,815-810	1-2,837-836[UP5];x-x,826-823[BULt];x-x,816-816[BULt];24-24,809-809[UP3]	.((((((.((((((....(((((((((..&..)))))))))----))))))-)))))).	CGUCAUCGAAAUUUGCAGAGUCACUCGGA&UACGAGUGACU----GAAUUU-GAUGACU	0	0	NA	NA	NA	0	0	NA	NA	NA	2	53.6509	2	0.217965	Output/S24h/cleaveLand_result/t_plot/PC-3p-110421_70_XM_016092291.2_828_TPlot.pdf	0	0	53.6509	5.0035e-24	2.27989e-23	yes	NA	NA
PC-3p-110421_70	XM_016104157.2	603	624	615	-39	-27.6	0.707692	4.5	1-17,624-608;20-24,607-603	18-19,x-x[BULq]	(((((--(((((((((((((((((&)))))))))))))))))..)))))	GGUCG--AAAUUCAGUCACUUGUG&UACGAGUGACUGAAUUUGAUGACU	2	60.562	3	0.0280798	Output/S0h/cleaveLand_result/t_plot/PC-3p-110421_70_XM_016104157.2_615_TPlot.pdf	0	0	NA	NA	NA	3	80.4764	3	0.032112	Output/S24h/cleaveLand_result/t_plot/PC-3p-110421_70_XM_016104157.2_615_TPlot.pdf	60.562	0	80.4764	5.8924e-17	2.39509e-16	yes	NA	NA
PC-3p-110421_70	XM_021134730.1	833	861	852	-39	-25.8	0.661538	14	3-11,859-851;12-17,846-841;18-23,839-834	1-2,861-860[UP5];x-x,850-847[BULt];x-x,840-840[BULt];24-24,833-833[UP3]	.((((((.((((((....(((((((((..&..)))))))))----))))))-)))))).	CGUCAUCGAAAUUUGCAGAGUCACUCGGA&UACGAGUGACU----GAAUUU-GAUGACU	0	0	NA	NA	NA	0	0	NA	NA	NA	1	26.8255	4	0.626756	Output/S24h/cleaveLand_result/t_plot/PC-3p-110421_70_XM_021134730.1_852_TPlot.pdf	0	0	26.8255	2.2374e-12	2.55455e-12	yes	NA	NA
PC-3p-110449_70	BGI_novel_T006116	973	996	987	-37.9	-29.2	0.770449	5	1-13,996-984;15-24,982-973	14-14,983-983[SIL]	((((((((((.(((((((((((((&))))))))))))).))))))))))	GGUGUAAUUGUCUUUAUGUGAAGU&AUUUUACAUGAAGUCGAUUGCACC	0	0	NA	NA	NA	1	33.3045	4	0.590771	Output/S8h/cleaveLand_result/t_plot/PC-3p-110449_70_BGI_novel_T006116_987_TPlot.pdf	0	0	NA	NA	NA	0	33.3045	0	3.4347e-15	7.86611e-15	yes	GO:0008152(metabolic process)	NA
PC-3p-110449_70	BGI_novel_T011749	2211	2235	2226	-37.9	-27.6	0.728232	5	2-19,2234-2217;22-24,2213-2211	1-1,2235-2235[UP5];20-21,2216-2214[AILt]	(((...((((((((((((((((((.&.))))))))))))))))))-..)))	GGUAAAAAUCGACUUCAUGUAAAGG&AUUUUACAUGAAGUCGAUU-GCACC	1	30.281	4	0.776452	Output/S0h/cleaveLand_result/t_plot/PC-3p-110449_70_BGI_novel_T011749_2226_TPlot.pdf	0	0	NA	NA	NA	0	0	NA	NA	NA	30.281	0	0	7.0631e-14	1.09903e-13	yes	NA	NA
PC-3p-110449_70	XM_016091348.2	353	380	367	-37.9	-27.78	0.732982	12.5	1-7,380-374;9-23,368-354	8-8,373-369[AILt];24-24,353-353[UP3]	.(((((((((((((((.....(((((((&)))))))----.))))))))))))))).	CGUGCGAUCGACUUCACCGUCGUGAAAU&AUUUUAC----AUGAAGUCGAUUGCACC	0	0	NA	NA	NA	1	33.3045	4	0.732583	Output/S8h/cleaveLand_result/t_plot/PC-3p-110449_70_XM_016091348.2_367_TPlot.pdf	0	0	NA	NA	NA	0	33.3045	0	3.4347e-15	7.86611e-15	yes	NA	ko01110(Biosynthesis of secondary metabolites);ko00906(Carotenoid biosynthesis);ko01100(Metabolic pathways)
PC-3p-110449_70	XM_016107444.2	403	428	419	-37.9	-25.58	0.674934	12	1-4,428-425;7-15,422-414;18-24,409-403	5-6,424-423[SIL];16-17,413-410[AILt]	(((((((....(((((((((..((((&))))..)))))))))--..)))))))	GGUGCGAGGAGGGCUUCGUGGAGGAU&AUUUUACAUGAAGUC--GAUUGCACC	0	0	NA	NA	NA	1	33.3045	4	0.942192	Output/S8h/cleaveLand_result/t_plot/PC-3p-110449_70_XM_016107444.2_419_TPlot.pdf	0	0	NA	NA	NA	0	33.3045	0	3.4347e-15	7.86611e-15	yes	GO:0005515(protein binding);GO:0005488(binding);GO:0019904(protein domain specific binding)	NA
PC-3p-110449_70	XM_016107445.2	368	393	384	-37.9	-25.58	0.674934	12	1-4,393-390;7-15,387-379;18-24,374-368	5-6,389-388[SIL];16-17,378-375[AILt]	(((((((....(((((((((..((((&))))..)))))))))--..)))))))	GGUGCGAGGAGGGCUUCGUGGAGGAU&AUUUUACAUGAAGUC--GAUUGCACC	0	0	NA	NA	NA	0	0	NA	NA	NA	4	107.302	2	0.688955	Output/S24h/cleaveLand_result/t_plot/PC-3p-110449_70_XM_016107445.2_384_TPlot.pdf	0	0	107.302	2.4987e-47	7.37574e-46	yes	GO:0005515(protein binding);GO:0005488(binding);GO:0019904(protein domain specific binding)	NA
PC-3p-110449_70	XM_016108540.2	384	413	404	-37.9	-27.3	0.720317	17	6-18,408-396;19-24,389-384	1-5,413-409[UP5];x-x,395-390[BULt]	((((((......(((((((((((((.....&.....)))))))))))))------))))))	GGUGCGUCGCUCGUCGACUUCGUGUUCCUC&AUUUUACAUGAAGUCGAU------UGCACC	2	60.562	3	0.142181	Output/S0h/cleaveLand_result/t_plot/PC-3p-110449_70_XM_016108540.2_404_TPlot.pdf	0	0	NA	NA	NA	0	0	NA	NA	NA	60.562	0	0	4.9856e-27	3.03728e-26	yes	GO:0005740(mitochondrial envelope);GO:0022900(electron transport chain);GO:0019866(organelle inner membrane);GO:0019752(carboxylic acid metabolic process);GO:0044237(cellular metabolic process);GO:0000104(succinate dehydrogenase activity);GO:0043436(oxoacid metabolic process);GO:0050662(coenzyme binding);GO:0044429(mitochondrial part);GO:1901363(heterocyclic compound binding);GO:0031090(organelle…	ko01200(Carbon metabolism);ko00190(Oxidative phosphorylation);ko01100(Metabolic pathways);ko00020(Citrate cycle (TCA cycle));ko01110(Biosynthesis of secondary metabolites)
PC-3p-110481_70	BGI_novel_T003273	2041	2064	2056	-42.3	-28.1	0.664303	7.5	2-8,2063-2057;10-16,2056-2050;17-23,2048-2042	1-1,2064-2064[UP5];9-9,x-x[BULq];x-x,2049-2049[BULt];24-24,2041-2041[UP3]	.(((((((.(((((((-(((((((.&.))))))).)))))))-))))))).	CUUCAGGUAGCAGAUG-UUUUGCGC&ACGUAAAAUCGUCUGC-ACCUGAGU	0	0	NA	NA	NA	0	0	NA	NA	NA	1	26.8255	4	0.64515	Output/S24h/cleaveLand_result/t_plot/PC-3p-110481_70_BGI_novel_T003273_2056_TPlot.pdf	0	0	26.8255	2.2374e-12	2.55455e-12	yes	GO:0016043(cellular component organization);GO:0032502(developmental process);GO:0048856(anatomical structure development);GO:0048869(cellular developmental process);GO:0009987(cellular process);GO:0009653(anatomical structure morphogenesis);GO:0071840(cellular component organization or biogenesis);GO:0000902(cell morphogenesis);GO:0032989(cellular component morphogenesis)	ko03040(Spliceosome)
PC-3p-110481_70	XM_016076506.2	1467	1491	1482	-42.3	-27.8	0.65721	9	2-4,1490-1488;7-15,1485-1477;16-24,1475-1467	1-1,1491-1491[UP5];5-6,1487-1486[SIL];x-x,1476-1476[BULt]	(((((((((.(((((((((..(((.&.)))..)))))))))-)))))))))	GCUUAGGUGAUGGACGGUUGAACGA&ACGUAAAAUCGUCUG-CACCUGAGU	0	0	NA	NA	NA	0	0	NA	NA	NA	1	26.8255	4	0.731265	Output/S24h/cleaveLand_result/t_plot/PC-3p-110481_70_XM_016076506.2_1482_TPlot.pdf	0	0	26.8255	2.2374e-12	2.55455e-12	yes	GO:0009057(macromolecule catabolic process);GO:0036211(protein modification process);GO:0032553(ribonucleotide binding);GO:0036094(small molecule binding);GO:0005737(cytoplasm);GO:0016740(transferase activity);GO:0008152(metabolic process);GO:0016874(ligase activity);GO:0044424(intracellular part);GO:0044238(primary metabolic process);GO:0030163(protein catabolic process);GO:0043226(organelle);GO…	ko04120(Ubiquitin mediated proteolysis)
PC-3p-110481_70	XM_016085373.2	3174	3197	3188	-42.3	-28	0.661939	15	8-24,3190-3174	1-7,3197-3191[UP5]	(((((((((((((((((.......&.......)))))))))))))))))	ACUUGGGUGCAGAUGAUGAGUUUG&ACGUAAAAUCGUCUGCACCUGAGU	0	0	NA	NA	NA	0	0	NA	NA	NA	1	26.8255	4	0.679265	Output/S24h/cleaveLand_result/t_plot/PC-3p-110481_70_XM_016085373.2_3188_TPlot.pdf	0	0	26.8255	2.2374e-12	2.55455e-12	yes	NA	NA
PC-3p-110481_70	XM_016098458.2	1723	1746	1738	-42.3	-28.1	0.664303	7.5	2-8,1745-1739;10-16,1738-1732;17-23,1730-1724	1-1,1746-1746[UP5];9-9,x-x[BULq];x-x,1731-1731[BULt];24-24,1723-1723[UP3]	.(((((((.(((((((-(((((((.&.))))))).)))))))-))))))).	CUUCAGGUAGCAGAUG-UUUUGCGC&ACGUAAAAUCGUCUGC-ACCUGAGU	0	0	NA	NA	NA	3	99.9134	1	0.018062	Output/S8h/cleaveLand_result/t_plot/PC-3p-110481_70_XM_016098458.2_1738_TPlot.pdf	2	53.6509	2	0.308425	Output/S24h/cleaveLand_result/t_plot/PC-3p-110481_70_XM_016098458.2_1738_TPlot.pdf	0	99.9134	53.6509	6.114e-22	2.68273e-21	yes	GO:0016043(cellular component organization);GO:0032502(developmental process);GO:0048856(anatomical structure development);GO:0048869(cellular developmental process);GO:0009987(cellular process);GO:0009653(anatomical structure morphogenesis);GO:0071840(cellular component organization or biogenesis);GO:0000902(cell morphogenesis);GO:0032989(cellular component morphogenesis)	ko03040(Spliceosome)
PC-3p-110481_70	XM_016098459.2	1710	1733	1725	-42.3	-28.1	0.664303	7.5	2-8,1732-1726;10-16,1725-1719;17-23,1717-1711	1-1,1733-1733[UP5];9-9,x-x[BULq];x-x,1718-1718[BULt];24-24,1710-1710[UP3]	.(((((((.(((((((-(((((((.&.))))))).)))))))-))))))).	CUUCAGGUAGCAGAUG-UUUUGCGC&ACGUAAAAUCGUCUGC-ACCUGAGU	1	30.281	4	0.542787	Output/S0h/cleaveLand_result/t_plot/PC-3p-110481_70_XM_016098459.2_1725_TPlot.pdf	0	0	NA	NA	NA	0	0	NA	NA	NA	30.281	0	0	7.0631e-14	1.09903e-13	yes	GO:0016043(cellular component organization);GO:0032502(developmental process);GO:0048856(anatomical structure development);GO:0048869(cellular developmental process);GO:0009987(cellular process);GO:0009653(anatomical structure morphogenesis);GO:0071840(cellular component organization or biogenesis);GO:0000902(cell morphogenesis);GO:0032989(cellular component morphogenesis)	ko03040(Spliceosome)
PC-3p-110481_70	XM_016116985.2	1601	1624	1615	-42.3	-27.6	0.652482	17.5	10-24,1615-1601	1-9,1624-1616[UP5]	(((((((((((((((.........&.........)))))))))))))))	AUUCAGGUGCAGACGUUAAAGUAA&ACGUAAAAUCGUCUGCACCUGAGU	0	0	NA	NA	NA	2	66.6089	2	0.348543	Output/S8h/cleaveLand_result/t_plot/PC-3p-110481_70_XM_016116985.2_1615_TPlot.pdf	0	0	NA	NA	NA	0	66.6089	0	1.1789e-29	9.89421e-29	yes	GO:0004672(protein kinase activity);GO:0006793(phosphorus metabolic process);GO:1901265(nucleoside phosphate binding);GO:0006468(protein phosphorylation);GO:0018209(peptidyl-serine modification);GO:0005622(intracellular);GO:0051716(cellular response to stimulus);GO:0006796(phosphate-containing compound metabolic process);GO:0005623(cell);GO:0043168(anion binding);GO:0007154(cell communication);GO…	NA
PC-3p-113847_67	BGI_novel_T004791	625	649	640	-42.2	-33.2	0.78673	2	1-14,649-636;16-18,634-632;19-24,630-625	15-15,635-635[SIL];x-x,631-631[BULt]	((((((.(((.((((((((((((((&)))))))))))))).)))-))))))	AACUCAUGUGAAGUCGAUUUCACGU&ACGUGAAAUCGACUGCAC-UGAGUU	0	0	NA	NA	NA	0	0	NA	NA	NA	1	26.8255	4	0.411787	Output/S24h/cleaveLand_result/t_plot/PC-3p-113847_67_BGI_novel_T004791_640_TPlot.pdf	0	0	26.8255	2.2374e-12	2.55455e-12	yes	NA	NA
PC-3p-113847_67	XM_016081231.2	473	497	488	-42.2	-30.7	0.727488	6.5	2-16,496-482;18-19,480-479;20-24,477-473	1-1,497-497[UP5];17-17,481-481[SIL];x-x,478-478[BULt]	(((((.((.(((((((((((((((.&.))))))))))))))).))-)))))	AGCUCGAGAGCAGUUGGUUUCGCGG&ACGUGAAAUCGACUGCACU-GAGUU	0	0	NA	NA	NA	3	99.9134	2	0.252139	Output/S8h/cleaveLand_result/t_plot/PC-3p-113847_67_XM_016081231.2_488_TPlot.pdf	0	0	NA	NA	NA	0	99.9134	0	4.0431e-44	9.26541e-43	yes	GO:0016740(transferase activity);GO:0016772(transferase activity, transferring phosphorus-containing groups);GO:0003824(catalytic activity);GO:0016779(nucleotidyltransferase activity)	ko03018(RNA degradation)
PC-3p-113847_67	XM_016090400.2	1171	1193	1184	-42.2	-28.1	0.665877	6.5	1-13,1193-1181;15-21,1180-1174	14-14,x-x[BULq];22-24,1173-1171[UP3]	...(((((((-(((((((((((((&))))))))))))).)))))))...	UGAUCGGUGC-GUUGAUUUCAUGU&ACGUGAAAUCGACUGCACUGAGUU	0	0	NA	NA	NA	1	33.3045	4	0.842886	Output/S8h/cleaveLand_result/t_plot/PC-3p-113847_67_XM_016090400.2_1184_TPlot.pdf	0	0	NA	NA	NA	0	33.3045	0	3.4347e-15	7.86611e-15	yes	GO:0043227(membrane-bounded organelle);GO:0009987(cellular process);GO:0043226(organelle);GO:0044238(primary metabolic process);GO:0043436(oxoacid metabolic process);GO:0005623(cell);GO:0008194(UDP-glycosyltransferase activity);GO:0019585(glucuronate metabolic process);GO:0044464(cell part);GO:0006063(uronic acid metabolic process);GO:0052695(cellular glucuronidation);GO:0006082(organic acid meta…	ko01110(Biosynthesis of secondary metabolites)
PC-3p-114045_66	BGI_novel_T008417	1701	1726	1715	-37.3	-25.3	0.678284	10.5	1-5,1726-1722;6-10,1719-1715;12-23,1713-1702	x-x,1721-1720[BULt];11-11,1714-1714[SIL];24-24,1701-1701[UP3]	.((((((((((((.(((((..(((((&)))))--))))).)))))))))))).	UGUUGGAGCUUGUGUUGUUGCGGCAU&AUGCU--AAUAAGACAAGUUCUGACU	0	0	NA	NA	NA	1	33.3045	4	0.654813	Output/S8h/cleaveLand_result/t_plot/PC-3p-114045_66_BGI_novel_T008417_1715_TPlot.pdf	0	0	NA	NA	NA	0	33.3045	0	3.4347e-15	7.86611e-15	yes	NA	ko03010(Ribosome)
PC-3p-114045_66	BGI_novel_T009885	625	650	640	-37.3	-24.9	0.66756	10	2-6,649-645;8-20,642-630;22-22,628-628;23-24,626-625	1-1,650-650[UP5];7-7,644-643[AILt];21-21,629-629[SIL];x-x,627-627[BULt]	((.(.(((((((((((((..(((((.&.)))))-.))))))))))))).)-))	GGCUGAGAGCUUGUCUUGGAUGGCAG&AUGCUA-AUAAGACAAGUUCUGA-CU	0	0	NA	NA	NA	2	66.6089	2	0.523302	Output/S8h/cleaveLand_result/t_plot/PC-3p-114045_66_BGI_novel_T009885_640_TPlot.pdf	0	0	NA	NA	NA	0	66.6089	0	1.1789e-29	9.89421e-29	yes	GO:0008152(metabolic process);GO:1901576(organic substance biosynthetic process);GO:0004315(3-oxoacyl-[acyl-carrier-protein] synthase activity);GO:0006631(fatty acid metabolic process);GO:0044281(small molecule metabolic process);GO:0044237(cellular metabolic process);GO:0016053(organic acid biosynthetic process);GO:0006082(organic acid metabolic process);GO:0016740(transferase activity);GO:00434…	ko01212(Fatty acid metabolism);ko00061(Fatty acid biosynthesis);ko01100(Metabolic pathways)
PC-3p-114045_66	BGI_novel_T011141	132	156	147	-37.3	-25	0.670241	8.5	1-4,156-153;6-8,151-149;10-22,147-135;23-24,133-132	5-5,152-152[SIL];9-9,148-148[SIL];x-x,134-134[BULt]	((.(((((((((((((.(((.((((&)))).))).)))))))))))))-))	GGCUCGGAGCUUGUCUCGUUCGCGU&AUGCUAAUAAGACAAGUUCUGA-CU	0	0	NA	NA	NA	1	33.3045	4	0.861713	Output/S8h/cleaveLand_result/t_plot/PC-3p-114045_66_BGI_novel_T011141_147_TPlot.pdf	0	0	NA	NA	NA	0	33.3045	0	3.4347e-15	7.86611e-15	yes	NA	NA
PC-3p-114045_66	XM_016085999.2	2068	2090	2081	-37.3	-26.7	0.715818	8	1-4,2090-2087;7-11,2084-2080;13-23,2079-2069	5-6,2086-2085[SIL];12-12,x-x[BULq];24-24,2068-2068[UP3]	.(((((((((((-(((((..((((&))))..))))).))))))))))).	UGUCAGGGCUUG-CUUAUCUGCAU&AUGCUAAUAAGACAAGUUCUGACU	4	121.124	0	0.00402149	Output/S0h/cleaveLand_result/t_plot/PC-3p-114045_66_XM_016085999.2_2081_TPlot.pdf	0	0	NA	NA	NA	0	0	NA	NA	NA	121.124	0	0	2.4796e-53	9.49387e-52	yes	GO:0050789(regulation of biological process);GO:0009987(cellular process);GO:0016310(phosphorylation);GO:0035639(purine ribonucleoside triphosphate binding);GO:0003824(catalytic activity);GO:0006464(cellular protein modification process);GO:0032559(adenyl ribonucleotide binding);GO:0051716(cellular response to stimulus);GO:0097367(carbohydrate derivative binding);GO:0097159(organic cyclic compoun…	ko04016(MAPK signaling pathway - plant)
PC-3p-114614_66	XM_016083347.2	756	779	770	-37.3	-27.6	0.739946	9.5	4-6,776-774;8-24,772-756	1-3,779-777[UP5];7-7,773-773[SIL]	(((((((((((((((((.(((...&...))).)))))))))))))))))	GCUCUCGUGAUGAUGUUGUUAAUA&AUGUAAAGAUAUCAUCACGAGAGU	1	30.281	4	0.0855575	Output/S0h/cleaveLand_result/t_plot/PC-3p-114614_66_XM_016083347.2_770_TPlot.pdf	3	99.9134	2	0.0286358	Output/S8h/cleaveLand_result/t_plot/PC-3p-114614_66_XM_016083347.2_770_TPlot.pdf	1	26.8255	4	0.0961385	Output/S24h/cleaveLand_result/t_plot/PC-3p-114614_66_XM_016083347.2_770_TPlot.pdf	30.281	99.9134	26.8255	7.7624e-15	1.77012e-14	yes	GO:1901576(organic substance biosynthetic process);GO:0006497(protein lipidation);GO:0009987(cellular process);GO:0042158(lipoprotein biosynthetic process);GO:0009058(biosynthetic process);GO:0044260(cellular macromolecule metabolic process);GO:1901566(organonitrogen compound biosynthetic process);GO:0008152(metabolic process);GO:0043412(macromolecule modification);GO:0034645(cellular macromolecu…	NA
PC-3p-114614_66	XM_016114267.2	973	996	987	-37.3	-25.2	0.675603	8.5	3-5,994-992;8-17,989-980;19-24,978-973	1-2,996-995[UP5];6-7,991-990[SIL];18-18,979-979[SIL]	((((((.((((((((((..(((..&..)))..)))))))))).))))))	GCUCUCAUGAUGAUAUCACUACUC&AUGUAAAGAUAUCAUCACGAGAGU	0	0	NA	NA	NA	0	0	NA	NA	NA	1	26.8255	4	0.607407	Output/S24h/cleaveLand_result/t_plot/PC-3p-114614_66_XM_016114267.2_987_TPlot.pdf	0	0	26.8255	2.2374e-12	2.55455e-12	yes	NA	NA
PC-3p-114614_66	XM_021125110.1	1630	1653	1644	-37.3	-25.4	0.680965	16	8-18,1646-1636;20-24,1634-1630	1-7,1653-1647[UP5];19-19,1635-1635[SIL]	(((((.(((((((((((.......&.......))))))))))).)))))	ACUCUGGUGAUGGUGUCACUCAUG&AUGUAAAGAUAUCAUCACGAGAGU	0	0	NA	NA	NA	1	33.3045	4	0.412473	Output/S8h/cleaveLand_result/t_plot/PC-3p-114614_66_XM_021125110.1_1644_TPlot.pdf	0	0	NA	NA	NA	0	33.3045	0	3.4347e-15	7.86611e-15	yes	GO:0097367(carbohydrate derivative binding);GO:0044464(cell part);GO:0050789(regulation of biological process);GO:0051130(positive regulation of cellular component organization);GO:0036094(small molecule binding);GO:0044430(cytoskeletal part);GO:0030029(actin filament-based process);GO:0044089(positive regulation of cellular component biogenesis);GO:0043228(non-membrane-bounded organelle);GO:0033…	NA
PC-3p-114614_66	XM_021132240.1	1803	1827	1817	-37.3	-25.6	0.686327	11.5	2-4,1826-1824;9-24,1818-1803	1-1,1827-1827[UP5];5-8,1823-1819[AILt]	((((((((((((((((.....(((.&.)))-....))))))))))))))))	ACUCUUGUGAUGAUAUGAUGGACAG&AUGU-AAAGAUAUCAUCACGAGAGU	1	30.281	4	0.331342	Output/S0h/cleaveLand_result/t_plot/PC-3p-114614_66_XM_021132240.1_1817_TPlot.pdf	0	0	NA	NA	NA	0	0	NA	NA	NA	30.281	0	0	7.0631e-14	1.09903e-13	yes	NA	NA
PC-3p-114614_66	XM_021132241.1	1692	1716	1706	-37.3	-25.6	0.686327	11.5	2-4,1715-1713;9-24,1707-1692	1-1,1716-1716[UP5];5-8,1712-1708[AILt]	((((((((((((((((.....(((.&.)))-....))))))))))))))))	ACUCUUGUGAUGAUAUGAUGGACAG&AUGU-AAAGAUAUCAUCACGAGAGU	1	30.281	4	0.28495	Output/S0h/cleaveLand_result/t_plot/PC-3p-114614_66_XM_021132241.1_1706_TPlot.pdf	0	0	NA	NA	NA	0	0	NA	NA	NA	30.281	0	0	7.0631e-14	1.09903e-13	yes	NA	NA
PC-3p-114792_66	BGI_novel_T001155	2986	3011	3003	-48.5	-32.9	0.678351	9	1-9,3011-3003;12-15,3001-2998;16-19,2994-2991;21-24,2989-2986	10-11,3002-3002[AILq];x-x,2997-2995[BULt];20-20,2990-2990[SIL]	((((.((((...((((.-(((((((((&)))))))))..))))---)))).))))	GGUGGGGUCUUCGACUG-GGGUGAAGU&ACUUCACCUGAAGUC---GACCGCACC	0	0	NA	NA	NA	0	0	NA	NA	NA	1	26.8255	4	0.51945	Output/S24h/cleaveLand_result/t_plot/PC-3p-114792_66_BGI_novel_T001155_3003_TPlot.pdf	0	0	26.8255	2.2374e-12	2.55455e-12	yes	NA	ko03010(Ribosome)
PC-3p-114792_66	BGI_novel_T001355	264	291	282	-48.5	-32.9	0.678351	10.5	2-4,290-288;7-14,285-278;15-18,274-271;19-24,269-264	1-1,291-291[UP5];5-6,287-286[SIL];x-x,277-275[BULt];x-x,270-270[BULt]	((((((.((((...((((((((..(((.&.)))..))))))))---))))-))))))	GGUGCGAGUCGGAAGCUUCAGGGAGAGA&ACUUCACCUGAAGU---CGAC-CGCACC	0	0	NA	NA	NA	0	0	NA	NA	NA	1	26.8255	4	0.543133	Output/S24h/cleaveLand_result/t_plot/PC-3p-114792_66_BGI_novel_T001355_282_TPlot.pdf	0	0	26.8255	2.2374e-12	2.55455e-12	yes	GO:2000112(regulation of cellular macromolecule biosynthetic process);GO:0044464(cell part);GO:0051246(regulation of protein metabolic process);GO:0044248(cellular catabolic process);GO:0043228(non-membrane-bounded organelle);GO:0005737(cytoplasm);GO:0019439(aromatic compound catabolic process);GO:0006139(nucleobase-containing compound metabolic process);GO:0043170(macromolecule metabolic process…	ko03018(RNA degradation)
PC-3p-114792_66	BGI_novel_T002926	2070	2096	2085	-48.5	-32.8	0.676289	8.5	1-5,2096-2092;6-9,2090-2087;11-21,2084-2074;22-24,2072-2070	x-x,2091-2091[BULt];10-10,2086-2085[AILt];x-x,2073-2073[BULt]	(((.(((((((((((..((((.(((((&)))))-))))-.)))))))))))-)))	GGUGGCGGUCGAUUUGGAGGUAGGAGU&ACUUC-ACCU-GAAGUCGACCGC-ACC	0	0	NA	NA	NA	2	66.6089	2	0.218826	Output/S8h/cleaveLand_result/t_plot/PC-3p-114792_66_BGI_novel_T002926_2085_TPlot.pdf	0	0	NA	NA	NA	0	66.6089	0	1.1789e-29	9.89421e-29	yes	GO:1901265(nucleoside phosphate binding);GO:0097159(organic cyclic compound binding);GO:1901363(heterocyclic compound binding);GO:0005488(binding);GO:0000166(nucleotide binding);GO:0036094(small molecule binding);GO:0003676(nucleic acid binding)	NA
PC-3p-114792_66	BGI_novel_T002927	2067	2093	2082	-48.5	-32.8	0.676289	8.5	1-5,2093-2089;6-9,2087-2084;11-21,2081-2071;22-24,2069-2067	x-x,2088-2088[BULt];10-10,2083-2082[AILt];x-x,2070-2070[BULt]	(((.(((((((((((..((((.(((((&)))))-))))-.)))))))))))-)))	GGUGGCGGUCGAUUUGGAGGUAGGAGU&ACUUC-ACCU-GAAGUCGACCGC-ACC	1	30.281	4	0.572451	Output/S0h/cleaveLand_result/t_plot/PC-3p-114792_66_BGI_novel_T002927_2082_TPlot.pdf	0	0	NA	NA	NA	1	26.8255	4	0.617204	Output/S24h/cleaveLand_result/t_plot/PC-3p-114792_66_BGI_novel_T002927_2082_TPlot.pdf	30.281	0	26.8255	5.3891e-07	5.57092e-07	yes	GO:1901265(nucleoside phosphate binding);GO:0097159(organic cyclic compound binding);GO:1901363(heterocyclic compound binding);GO:0005488(binding);GO:0000166(nucleotide binding);GO:0036094(small molecule binding);GO:0003676(nucleic acid binding)	NA
PC-3p-114792_66	XM_016085238.2	963	990	980	-48.5	-31.8	0.65567	8.5	1-2,990-989;4-8,987-983;9-18,981-972;19-21,970-968;22-24,965-963	3-3,988-988[SIL];x-x,982-982[BULt];x-x,971-971[BULt];x-x,967-966[BULt]	(((..(((.((((((((((.(((((.((&)).)))))-))))))))))-)))--)))	GGUUCGCGCGUCGGCUUCGUGGUGACGU&ACUUCACC-UGAAGUCGAC-CGC--ACC	0	0	NA	NA	NA	1	33.3045	4	0.732583	Output/S8h/cleaveLand_result/t_plot/PC-3p-114792_66_XM_016085238.2_980_TPlot.pdf	0	0	NA	NA	NA	0	33.3045	0	3.4347e-15	7.86611e-15	yes	NA	NA
PC-3p-114792_66	XM_016089737.2	1607	1637	1622	-48.5	-34.5	0.71134	15	1-7,1637-1631;8-22,1624-1610;23-24,1608-1607	x-x,1630-1625[BULt];x-x,1609-1609[BULt]	((.(((((((((((((((......(((((((&)))))))------)))))))))))))))-))	GGUUGUGGUUGACUUCAGUCAUUUGUGAGGU&ACUUCAC------CUGAAGUCGACCGCA-CC	1	30.281	4	0.252247	Output/S0h/cleaveLand_result/t_plot/PC-3p-114792_66_XM_016089737.2_1622_TPlot.pdf	1	33.3045	4	0.241607	Output/S8h/cleaveLand_result/t_plot/PC-3p-114792_66_XM_016089737.2_1622_TPlot.pdf	2	53.6509	2	0.107874	Output/S24h/cleaveLand_result/t_plot/PC-3p-114792_66_XM_016089737.2_1622_TPlot.pdf	30.281	33.3045	53.6509	0.016019	0.0162024	yes	GO:0009059(macromolecule biosynthetic process);GO:0071704(organic substance metabolic process);GO:0009058(biosynthetic process);GO:0071840(cellular component organization or biogenesis);GO:0044264(cellular polysaccharide metabolic process);GO:0005976(polysaccharide metabolic process);GO:0071555(cell wall organization);GO:0009987(cellular process);GO:0044425(membrane part);GO:0071554(cell wall org…	NA
PC-3p-114792_66	XM_016097165.2	2070	2096	2085	-48.5	-32.8	0.676289	8.5	1-5,2096-2092;6-9,2090-2087;11-21,2084-2074;22-24,2072-2070	x-x,2091-2091[BULt];10-10,2086-2085[AILt];x-x,2073-2073[BULt]	(((.(((((((((((..((((.(((((&)))))-))))-.)))))))))))-)))	GGUGGCGGUCGAUUUGGAGGUAGGAGU&ACUUC-ACCU-GAAGUCGACCGC-ACC	0	0	NA	NA	NA	0	0	NA	NA	NA	1	26.8255	4	0.607407	Output/S24h/cleaveLand_result/t_plot/PC-3p-114792_66_XM_016097165.2_2085_TPlot.pdf	0	0	26.8255	2.2374e-12	2.55455e-12	yes	GO:1901265(nucleoside phosphate binding);GO:0097159(organic cyclic compound binding);GO:1901363(heterocyclic compound binding);GO:0005488(binding);GO:0000166(nucleotide binding);GO:0036094(small molecule binding);GO:0003676(nucleic acid binding)	NA
PC-3p-114792_66	XM_016097166.2	2067	2093	2082	-48.5	-32.8	0.676289	8.5	1-5,2093-2089;6-9,2087-2084;11-21,2081-2071;22-24,2069-2067	x-x,2088-2088[BULt];10-10,2083-2082[AILt];x-x,2070-2070[BULt]	(((.(((((((((((..((((.(((((&)))))-))))-.)))))))))))-)))	GGUGGCGGUCGAUUUGGAGGUAGGAGU&ACUUC-ACCU-GAAGUCGACCGC-ACC	0	0	NA	NA	NA	0	0	NA	NA	NA	1	26.8255	4	0.626756	Output/S24h/cleaveLand_result/t_plot/PC-3p-114792_66_XM_016097166.2_2082_TPlot.pdf	0	0	26.8255	2.2374e-12	2.55455e-12	yes	GO:1901265(nucleoside phosphate binding);GO:0097159(organic cyclic compound binding);GO:1901363(heterocyclic compound binding);GO:0005488(binding);GO:0000166(nucleotide binding);GO:0036094(small molecule binding);GO:0003676(nucleic acid binding)	NA
PC-3p-114792_66	XM_016097167.2	1935	1961	1950	-48.5	-32.8	0.676289	8.5	1-5,1961-1957;6-9,1955-1952;11-21,1949-1939;22-24,1937-1935	x-x,1956-1956[BULt];10-10,1951-1950[AILt];x-x,1938-1938[BULt]	(((.(((((((((((..((((.(((((&)))))-))))-.)))))))))))-)))	GGUGGCGGUCGAUUUGGAGGUAGGAGU&ACUUC-ACCU-GAAGUCGACCGC-ACC	0	0	NA	NA	NA	1	33.3045	4	0.535057	Output/S8h/cleaveLand_result/t_plot/PC-3p-114792_66_XM_016097167.2_1950_TPlot.pdf	1	26.8255	4	0.59736	Output/S24h/cleaveLand_result/t_plot/PC-3p-114792_66_XM_016097167.2_1950_TPlot.pdf	0	33.3045	26.8255	1.7537e-07	1.85914e-07	yes	GO:1901265(nucleoside phosphate binding);GO:0097159(organic cyclic compound binding);GO:1901363(heterocyclic compound binding);GO:0005488(binding);GO:0000166(nucleotide binding);GO:0036094(small molecule binding);GO:0003676(nucleic acid binding)	NA
PC-3p-114792_66	XM_016098550.2	2550	2573	2565	-48.5	-32.5	0.670103	8	2-5,2572-2569;7-15,2568-2560;18-24,2556-2550	1-1,2573-2573[UP5];6-6,x-x[BULq];16-17,2559-2557[AILt]	(((((((...(((((((((-((((.&.)))).)))))))))-..)))))))	GGUGUGGCUAGGCUUCGGG-GAAGC&ACUUCACCUGAAGUC-GACCGCACC	0	0	NA	NA	NA	3	99.9134	2	0.262925	Output/S8h/cleaveLand_result/t_plot/PC-3p-114792_66_XM_016098550.2_2565_TPlot.pdf	0	0	NA	NA	NA	0	99.9134	0	4.0431e-44	9.26541e-43	yes	GO:0048731(system development);GO:0005576(extracellular region);GO:0071704(organic substance metabolic process);GO:0015977(carbon fixation);GO:0006101(citrate metabolic process);GO:0043227(membrane-bounded organelle);GO:0005623(cell);GO:0044281(small molecule metabolic process);GO:0005622(intracellular);GO:0009507(chloroplast);GO:0044464(cell part);GO:0016829(lyase activity);GO:0043231(intracellu…	ko01200(Carbon metabolism);ko01100(Metabolic pathways);ko00710(Carbon fixation in photosynthetic organisms);ko00620(Pyruvate metabolism)
PC-3p-114792_66	XM_021137498.1	2046	2072	2061	-48.5	-32.8	0.676289	8.5	1-5,2072-2068;6-9,2066-2063;11-21,2060-2050;22-24,2048-2046	x-x,2067-2067[BULt];10-10,2062-2061[AILt];x-x,2049-2049[BULt]	(((.(((((((((((..((((.(((((&)))))-))))-.)))))))))))-)))	GGUGGCGGUCGAUUUGGAGGUAGGAGU&ACUUC-ACCU-GAAGUCGACCGC-ACC	0	0	NA	NA	NA	1	33.3045	4	0.52506	Output/S8h/cleaveLand_result/t_plot/PC-3p-114792_66_XM_021137498.1_2061_TPlot.pdf	0	0	NA	NA	NA	0	33.3045	0	3.4347e-15	7.86611e-15	yes	GO:1901265(nucleoside phosphate binding);GO:0097159(organic cyclic compound binding);GO:1901363(heterocyclic compound binding);GO:0005488(binding);GO:0000166(nucleotide binding);GO:0036094(small molecule binding);GO:0003676(nucleic acid binding)	NA
PC-3p-115095_65	BGI_novel_T000483	1291	1318	1309	-39.4	-25.9	0.65736	14.5	4-13,1315-1306;16-22,1298-1292	1-3,1318-1316[UP5];14-15,1305-1299[AILt];23-23,1291-1291[UP3]	.(((((((.......((((((((((...&...))))))))))-----..))))))).	UGCACAAAGGCAAUGGGACCCUCUGUGA&AAUCGGAGGGUCC-----AAUUUGUGUU	0	0	NA	NA	NA	0	0	NA	NA	NA	1	26.8255	4	0.99966	Output/S24h/cleaveLand_result/t_plot/PC-3p-115095_65_BGI_novel_T000483_1309_TPlot.pdf	0	0	26.8255	2.2374e-12	2.55455e-12	yes	GO:0016740(transferase activity);GO:0008152(metabolic process);GO:0044238(primary metabolic process);GO:1901360(organic cyclic compound metabolic process);GO:0009987(cellular process);GO:0043170(macromolecule metabolic process);GO:0097159(organic cyclic compound binding);GO:0044260(cellular macromolecule metabolic process);GO:0044237(cellular metabolic process);GO:0006725(cellular aromatic compou…	ko00240(Pyrimidine metabolism);ko03030(DNA replication);ko00230(Purine metabolism);ko01100(Metabolic pathways);ko03410(Base excision repair);ko03420(Nucleotide excision repair)
PC-3p-115095_65	BGI_novel_T000698	3287	3311	3301	-39.4	-25.8	0.654822	7	1-9,3311-3303;10-13,3301-3298;15-17,3296-3294;18-21,3292-3289	x-x,3302-3302[BULt];14-14,3297-3297[SIL];x-x,3293-3293[BULt];22-23,3288-3287[UP3]	..((((.(((.((((.(((((((((&)))))))))-)))).)))-))))..	ACCACGUGAUAGGACUCCUCCGAUU&AAUCGGAGG-GUCCAAUU-UGUGUU	0	0	NA	NA	NA	1	33.3045	4	0.99935	Output/S8h/cleaveLand_result/t_plot/PC-3p-115095_65_BGI_novel_T000698_3301_TPlot.pdf	0	0	NA	NA	NA	0	33.3045	0	3.4347e-15	7.86611e-15	yes	NA	NA
PC-3p-115095_65	BGI_novel_T002045	474	501	492	-39.4	-25.68	0.651777	14.5	3-13,499-489;17-20,480-477;22-23,475-474	1-2,501-500[UP5];14-16,488-481[AILt];21-21,476-476[SIL]	((.((((........(((((((((((..&..)))))))))))-----...)))).))	GAGGCAGUGACGACGGGGCCCUCCGAGC&AAUCGGAGGGUCC-----AAUUUGUGUU	0	0	NA	NA	NA	2	66.6089	2	0.926821	Output/S8h/cleaveLand_result/t_plot/PC-3p-115095_65_BGI_novel_T002045_492_TPlot.pdf	0	0	NA	NA	NA	0	66.6089	0	1.1789e-29	9.89421e-29	yes	GO:0055114(oxidation-reduction process);GO:0003824(catalytic activity);GO:0016491(oxidoreductase activity);GO:0008152(metabolic process)	ko00061(Fatty acid biosynthesis);ko00780(Biotin metabolism);ko01040(Biosynthesis of unsaturated fatty acids);ko01212(Fatty acid metabolism);ko01100(Metabolic pathways)
PC-3p-115095_65	BGI_novel_T008590	244	265	256	-39.4	-26.7	0.677665	5.5	1-14,265-252;16-17,251-250;19-20,248-247;22-23,245-244	15-15,x-x[BULq];18-18,249-249[SIL];21-21,246-246[SIL]	((.((.((-((((((((((((((&)))))))))))))).)).)).))	GAGGCCGA-UGGAUCCUCCGAUU&AAUCGGAGGGUCCAAUUUGUGUU	0	0	NA	NA	NA	0	0	NA	NA	NA	1	26.8255	4	0.969415	Output/S24h/cleaveLand_result/t_plot/PC-3p-115095_65_BGI_novel_T008590_256_TPlot.pdf	0	0	26.8255	2.2374e-12	2.55455e-12	yes	GO:0016021(integral component of membrane);GO:0044425(membrane part);GO:0031224(intrinsic component of membrane);GO:0016020(membrane)	ko03030(DNA replication);ko03420(Nucleotide excision repair);ko03430(Mismatch repair);ko00511(Other glycan degradation)
PC-3p-115095_65	BGI_novel_T008592	244	265	256	-39.4	-26.7	0.677665	5.5	1-14,265-252;16-17,251-250;19-20,248-247;22-23,245-244	15-15,x-x[BULq];18-18,249-249[SIL];21-21,246-246[SIL]	((.((.((-((((((((((((((&)))))))))))))).)).)).))	GAGGCCGA-UGGAUCCUCCGAUU&AAUCGGAGGGUCCAAUUUGUGUU	0	0	NA	NA	NA	0	0	NA	NA	NA	1	26.8255	4	0.967829	Output/S24h/cleaveLand_result/t_plot/PC-3p-115095_65_BGI_novel_T008592_256_TPlot.pdf	0	0	26.8255	2.2374e-12	2.55455e-12	yes	GO:0016021(integral component of membrane);GO:0044425(membrane part);GO:0031224(intrinsic component of membrane);GO:0016020(membrane)	ko03030(DNA replication);ko03420(Nucleotide excision repair);ko03430(Mismatch repair);ko00511(Other glycan degradation)
PC-3p-115095_65	XM_016078677.2	1171	1193	1184	-39.4	-31.5	0.799492	5.5	1-4,1193-1190;6-7,1188-1187;9-22,1185-1172	5-5,1189-1189[SIL];8-8,1186-1186[SIL];23-23,1171-1171[UP3]	.((((((((((((((.((.((((&)))).)).)))))))))))))).	UGCACAAAUUGGACCGUCGGAUU&AAUCGGAGGGUCCAAUUUGUGUU	1	30.281	4	0.0437351	Output/S0h/cleaveLand_result/t_plot/PC-3p-115095_65_XM_016078677.2_1184_TPlot.pdf	0	0	NA	NA	NA	0	0	NA	NA	NA	30.281	0	0	7.0631e-14	1.09903e-13	yes	GO:0016021(integral component of membrane);GO:0016020(membrane);GO:0031224(intrinsic component of membrane);GO:0044425(membrane part)	NA
PC-3p-115095_65	XM_016079456.2	3098	3120	3111	-39.4	-29.3	0.743655	8.5	3-14,3118-3107;17-21,3104-3100	1-2,3120-3119[UP5];15-16,3106-3105[SIL];22-23,3099-3098[UP3]	..(((((..((((((((((((..&..))))))))))))..)))))..	UUCGCAAUCUGGACCCUCUGAAC&AAUCGGAGGGUCCAAUUUGUGUU	1	30.281	4	0.511065	Output/S0h/cleaveLand_result/t_plot/PC-3p-115095_65_XM_016079456.2_3111_TPlot.pdf	0	0	NA	NA	NA	0	0	NA	NA	NA	30.281	0	0	7.0631e-14	1.09903e-13	yes	NA	ko03015(mRNA surveillance pathway)
PC-3p-115095_65	XM_016086346.2	1533	1555	1546	-39.4	-26.6	0.675127	6.5	2-18,1554-1538;21-23,1535-1533	1-1,1555-1555[UP5];19-20,1537-1536[SIL]	(((..(((((((((((((((((.&.)))))))))))))))))..)))	GACCAAGGUUGGAUCCUUCGAUG&AAUCGGAGGGUCCAAUUUGUGUU	1	30.281	4	0.962632	Output/S0h/cleaveLand_result/t_plot/PC-3p-115095_65_XM_016086346.2_1546_TPlot.pdf	3	99.9134	2	0.656212	Output/S8h/cleaveLand_result/t_plot/PC-3p-115095_65_XM_016086346.2_1546_TPlot.pdf	1	26.8255	4	0.975636	Output/S24h/cleaveLand_result/t_plot/PC-3p-115095_65_XM_016086346.2_1546_TPlot.pdf	30.281	99.9134	26.8255	7.7624e-15	1.77012e-14	yes	GO:1901576(organic substance biosynthetic process);GO:0016053(organic acid biosynthetic process);GO:0009987(cellular process);GO:0008652(cellular amino acid biosynthetic process);GO:0016614(oxidoreductase activity, acting on CH-OH group of donors);GO:1901607(alpha-amino acid biosynthetic process);GO:0006520(cellular amino acid metabolic process);GO:0009069(serine family amino acid metabolic proce…	ko01230(Biosynthesis of amino acids);ko01100(Metabolic pathways);ko01200(Carbon metabolism);ko00260(Glycine, serine and threonine metabolism)
PC-3p-115095_65	XM_016094144.2	417	444	435	-39.4	-25.68	0.651777	14.5	3-13,442-432;17-20,423-420;22-23,418-417	1-2,444-443[UP5];14-16,431-424[AILt];21-21,419-419[SIL]	((.((((........(((((((((((..&..)))))))))))-----...)))).))	GAGGCAGUGACGACGGGGCCCUCCGAGC&AAUCGGAGGGUCC-----AAUUUGUGUU	1	30.281	4	0.999688	Output/S0h/cleaveLand_result/t_plot/PC-3p-115095_65_XM_016094144.2_435_TPlot.pdf	0	0	NA	NA	NA	0	0	NA	NA	NA	30.281	0	0	7.0631e-14	1.09903e-13	yes	GO:0055114(oxidation-reduction process);GO:0003824(catalytic activity);GO:0016491(oxidoreductase activity);GO:0008152(metabolic process)	ko00061(Fatty acid biosynthesis);ko00780(Biotin metabolism);ko01040(Biosynthesis of unsaturated fatty acids);ko01212(Fatty acid metabolism);ko01100(Metabolic pathways)
PC-3p-115095_65	XM_016095093.2	457	481	472	-39.4	-25.98	0.659391	11.5	4-13,478-469;16-22,464-458	1-3,481-479[UP5];14-15,468-465[AILt];23-23,457-457[UP3]	.(((((((....((((((((((...&...))))))))))--..))))))).	UACACAAGGGCAGGACCCUCUGUUU&AAUCGGAGGGUCC--AAUUUGUGUU	5	151.405	3	0.469092	Output/S0h/cleaveLand_result/t_plot/PC-3p-115095_65_XM_016095093.2_472_TPlot.pdf	2	66.6089	3	0.44558	Output/S8h/cleaveLand_result/t_plot/PC-3p-115095_65_XM_016095093.2_472_TPlot.pdf	1	26.8255	4	0.999326	Output/S24h/cleaveLand_result/t_plot/PC-3p-115095_65_XM_016095093.2_472_TPlot.pdf	151.405	66.6089	26.8255	2.8361e-22	1.25302e-21	yes	GO:0019222(regulation of metabolic process);GO:0000079(regulation of cyclin-dependent protein serine/threonine kinase activity);GO:0050790(regulation of catalytic activity);GO:0051174(regulation of phosphorus metabolic process);GO:1904029(regulation of cyclin-dependent protein kinase activity);GO:0051171(regulation of nitrogen compound metabolic process);GO:0031399(regulation of protein modificat…	ko01110(Biosynthesis of secondary metabolites);ko00630(Glyoxylate and dicarboxylate metabolism);ko01200(Carbon metabolism);ko01210(2-Oxocarboxylic acid metabolism);ko01100(Metabolic pathways);ko01230(Biosynthesis of amino acids);ko00020(Citrate cycle (TCA cycle))
PC-3p-115095_65	XM_016099628.2	3356	3377	3368	-39.4	-27	0.685279	9.5	4-14,3374-3364;16-18,3363-3361;20-23,3359-3356	1-3,3377-3375[UP5];15-15,x-x[BULq];19-19,3360-3360[SIL]	((((.(((-(((((((((((...&...))))))))))).))).))))	GACAGAGG-UGGACCCUCUGGAG&AAUCGGAGGGUCCAAUUUGUGUU	0	0	NA	NA	NA	1	33.3045	4	0.918753	Output/S8h/cleaveLand_result/t_plot/PC-3p-115095_65_XM_016099628.2_3368_TPlot.pdf	0	0	NA	NA	NA	0	33.3045	0	3.4347e-15	7.86611e-15	yes	GO:0003723(RNA binding);GO:0097159(organic cyclic compound binding);GO:1901363(heterocyclic compound binding);GO:0005488(binding);GO:0003676(nucleic acid binding)	ko03013(RNA transport);ko03015(mRNA surveillance pathway)
PC-3p-115095_65	XM_016100746.2	234	256	247	-39.4	-28.7	0.728426	9	5-14,252-243;16-23,241-234	1-4,256-253[UP5];15-15,242-242[SIL]	((((((((.((((((((((....&....)))))))))).))))))))	AACACAAAAUGGAUCCUCCUCCU&AAUCGGAGGGUCCAAUUUGUGUU	0	0	NA	NA	NA	0	0	NA	NA	NA	1	26.8255	4	0.763162	Output/S24h/cleaveLand_result/t_plot/PC-3p-115095_65_XM_016100746.2_247_TPlot.pdf	0	0	26.8255	2.2374e-12	2.55455e-12	yes	GO:1901564(organonitrogen compound metabolic process);GO:0003824(catalytic activity);GO:0019752(carboxylic acid metabolic process);GO:0009987(cellular process);GO:0006082(organic acid metabolic process);GO:0016740(transferase activity);GO:0044238(primary metabolic process);GO:0043436(oxoacid metabolic process);GO:0004084(branched-chain-amino-acid transaminase activity);GO:0016769(transferase acti…	ko00270(Cysteine and methionine metabolism);ko01110(Biosynthesis of secondary metabolites);ko00770(Pantothenate and CoA biosynthesis);ko01210(2-Oxocarboxylic acid metabolism);ko01100(Metabolic pathways);ko00280(Valine, leucine and isoleucine degradation);ko00290(Valine, leucine and isoleucine biosynthesis);ko01230(Biosynthesis of amino acids)
PC-3p-115095_65	XM_016101439.2	333	354	345	-39.4	-28.8	0.730964	7	1-13,354-342;17-21,339-335	14-16,341-340[AILq];22-23,334-333[UP3]	..(((((..-(((((((((((((&)))))))))))))...)))))..	GCCACGGCG-GGGCCCUCCGAUU&AAUCGGAGGGUCCAAUUUGUGUU	0	0	NA	NA	NA	0	0	NA	NA	NA	1	26.8255	4	0.737971	Output/S24h/cleaveLand_result/t_plot/PC-3p-115095_65_XM_016101439.2_345_TPlot.pdf	0	0	26.8255	2.2374e-12	2.55455e-12	yes	GO:0008270(zinc ion binding);GO:0043167(ion binding);GO:0031224(intrinsic component of membrane);GO:0044425(membrane part);GO:0005488(binding);GO:0046872(metal ion binding);GO:0043169(cation binding);GO:0016021(integral component of membrane);GO:0016020(membrane);GO:0046914(transition metal ion binding)	ko04141(Protein processing in endoplasmic reticulum)
PC-3p-115095_65	XM_016106938.2	660	681	672	-39.4	-27.8	0.705584	8	3-19,679-663;21-23,662-660	1-2,681-680[UP5];20-20,x-x[BULq]	(((-(((((((((((((((((..&..))))))))))))))))).)))	GGC-CAAAUUGGACCCUUUGGCU&AAUCGGAGGGUCCAAUUUGUGUU	2	60.562	2	0.43787	Output/S0h/cleaveLand_result/t_plot/PC-3p-115095_65_XM_016106938.2_672_TPlot.pdf	3	99.9134	2	0.420019	Output/S8h/cleaveLand_result/t_plot/PC-3p-115095_65_XM_016106938.2_672_TPlot.pdf	0	0	NA	NA	NA	60.562	99.9134	0	2.7065e-21	1.17827e-20	yes	GO:0044464(cell part);GO:0072350(tricarboxylic acid metabolic process);GO:0045239(tricarboxylic acid cycle enzyme complex);GO:0036094(small molecule binding);GO:0016903(oxidoreductase activity, acting on the aldehyde or oxo group of donors);GO:0015980(energy derivation by oxidation of organic compounds);GO:0005488(binding);GO:0005737(cytoplasm);GO:0044281(small molecule metabolic process);GO:0016…	ko00380(Tryptophan metabolism);ko00310(Lysine degradation);ko01100(Metabolic pathways);ko00020(Citrate cycle (TCA cycle));ko01110(Biosynthesis of secondary metabolites);ko01200(Carbon metabolism)
PC-3p-115095_65	XM_016107163.2	1587	1609	1600	-39.4	-28.5	0.72335	9	3-13,1607-1597;15-20,1595-1590	1-2,1609-1608[UP5];14-14,1596-1596[SIL];21-23,1589-1587[UP3]	...((((((.(((((((((((..&..))))))))))).))))))...	AUGGCGAAUGGGACCCUCCGGGA&AAUCGGAGGGUCCAAUUUGUGUU	0	0	NA	NA	NA	2	66.6089	2	0.353258	Output/S8h/cleaveLand_result/t_plot/PC-3p-115095_65_XM_016107163.2_1600_TPlot.pdf	0	0	NA	NA	NA	0	66.6089	0	1.1789e-29	9.89421e-29	yes	NA	NA
PC-3p-115095_65	XM_016108308.2	308	332	322	-39.4	-25.9	0.65736	9.5	3-8,330-325;9-13,323-319;16-19,316-313;20-23,311-308	1-2,332-331[UP5];x-x,324-324[BULt];14-15,318-317[SIL];x-x,312-312[BULt]	((((.((((..(((((.((((((..&..))))))-)))))..))))-))))	GGCGUCAAAGAGGACCUCUCCGAGC&AAUCGGAG-GGUCCAAUUUG-UGUU	0	0	NA	NA	NA	0	0	NA	NA	NA	3	80.4764	2	0.922998	Output/S24h/cleaveLand_result/t_plot/PC-3p-115095_65_XM_016108308.2_322_TPlot.pdf	0	0	80.4764	1.1184e-35	1.47636e-34	yes	NA	NA
PC-3p-115095_65	XM_016108330.2	1492	1516	1505	-39.4	-26.78	0.679695	14.5	3-5,1514-1512;8-22,1507-1493	1-2,1516-1515[UP5];6-7,1511-1508[AILt];23-23,1492-1492[UP3]	.(((((((((((((((....(((..&..)))--..))))))))))))))).	UGCACAGGUUGGGCCCCUAACGAGG&AAUCG--GAGGGUCCAAUUUGUGUU	0	0	NA	NA	NA	2	66.6089	2	0.619413	Output/S8h/cleaveLand_result/t_plot/PC-3p-115095_65_XM_016108330.2_1505_TPlot.pdf	0	0	NA	NA	NA	0	66.6089	0	1.1789e-29	9.89421e-29	yes	GO:0005975(carbohydrate metabolic process);GO:0016020(membrane);GO:0044425(membrane part);GO:0008152(metabolic process);GO:0016798(hydrolase activity, acting on glycosyl bonds);GO:0016787(hydrolase activity);GO:0016021(integral component of membrane);GO:0004553(hydrolase activity, hydrolyzing O-glycosyl compounds);GO:0044238(primary metabolic process);GO:0031224(intrinsic component of membrane);G…	NA
PC-3p-115095_65	XM_016108425.2	1002	1024	1015	-39.4	-25.7	0.652284	12.5	6-9,1019-1016;11-23,1014-1002	1-5,1024-1020[UP5];10-10,1015-1015[SIL]	(((((((((((((.((((.....&.....)))).)))))))))))))	GACACAAAUUGGAGUCUCGUAUG&AAUCGGAGGGUCCAAUUUGUGUU	0	0	NA	NA	NA	0	0	NA	NA	NA	1	26.8255	4	0.999873	Output/S24h/cleaveLand_result/t_plot/PC-3p-115095_65_XM_016108425.2_1015_TPlot.pdf	0	0	26.8255	2.2374e-12	2.55455e-12	yes	GO:0008194(UDP-glycosyltransferase activity);GO:0016758(transferase activity, transferring hexosyl groups);GO:0042285(xylosyltransferase activity);GO:0044038(cell wall macromolecule biosynthetic process);GO:0005976(polysaccharide metabolic process);GO:0009059(macromolecule biosynthetic process);GO:0005975(carbohydrate metabolic process);GO:0016763(transferase activity, transferring pentosyl group…	NA
PC-3p-115095_65	XM_016108467.2	1158	1181	1172	-39.4	-26.1	0.662437	11	4-6,1178-1176;8-12,1174-1170;13-22,1168-1159	1-3,1181-1179[UP5];7-7,1175-1175[SIL];x-x,1169-1169[BULt];23-23,1158-1158[UP3]	.((((((((((.(((((.(((...&...))).)))))-)))))))))).	UACAUAAGUUGAGACCCCCCGGAU&AAUCGGAGGGUC-CAAUUUGUGUU	0	0	NA	NA	NA	0	0	NA	NA	NA	1	26.8255	4	0.997791	Output/S24h/cleaveLand_result/t_plot/PC-3p-115095_65_XM_016108467.2_1172_TPlot.pdf	0	0	26.8255	2.2374e-12	2.55455e-12	yes	NA	ko04075(Plant hormone signal transduction);ko04933(AGE-RAGE signaling pathway in diabetic complications)
PC-3p-115095_65	XM_016109779.2	2850	2872	2863	-39.4	-26	0.659898	10	4-11,2869-2862;13-20,2860-2853	1-3,2872-2870[UP5];12-12,2861-2861[SIL];21-23,2852-2850[UP3]	...((((((((.((((((((...&...)))))))).))))))))...	AGAACAAAUUGAACCCUCCGGAU&AAUCGGAGGGUCCAAUUUGUGUU	0	0	NA	NA	NA	0	0	NA	NA	NA	1	26.8255	4	0.998965	Output/S24h/cleaveLand_result/t_plot/PC-3p-115095_65_XM_016109779.2_2863_TPlot.pdf	0	0	26.8255	2.2374e-12	2.55455e-12	yes	GO:0032555(purine ribonucleotide binding);GO:0036094(small molecule binding);GO:0016817(hydrolase activity, acting on acid anhydrides);GO:0043168(anion binding);GO:0003824(catalytic activity);GO:0032559(adenyl ribonucleotide binding);GO:0016818(hydrolase activity, acting on acid anhydrides, in phosphorus-containing anhydrides);GO:0004386(helicase activity);GO:0097159(organic cyclic compound bindi…	ko03018(RNA degradation)
PC-3p-115095_65	XM_016113039.2	2378	2398	2389	-39.4	-25.7	0.652284	7	1-14,2398-2385;17-19,2383-2381;21-23,2380-2378	15-16,2384-2384[AILq];20-20,x-x[BULq]	(((-(((.-((((((((((((((&))))))))))))))..))).)))	GAC-CAGC-UGGGCCCUCUGGUU&AAUCGGAGGGUCCAAUUUGUGUU	1	30.281	4	0.999627	Output/S0h/cleaveLand_result/t_plot/PC-3p-115095_65_XM_016113039.2_2389_TPlot.pdf	1	33.3045	4	0.999452	Output/S8h/cleaveLand_result/t_plot/PC-3p-115095_65_XM_016113039.2_2389_TPlot.pdf	2	53.6509	2	0.95493	Output/S24h/cleaveLand_result/t_plot/PC-3p-115095_65_XM_016113039.2_2389_TPlot.pdf	30.281	33.3045	53.6509	0.016019	0.0162024	yes	GO:0016788(hydrolase activity, acting on ester bonds);GO:1901363(heterocyclic compound binding);GO:0006725(cellular aromatic compound metabolic process);GO:0046914(transition metal ion binding);GO:0071704(organic substance metabolic process);GO:0005488(binding);GO:0044237(cellular metabolic process);GO:0090305(nucleic acid phosphodiester bond hydrolysis);GO:0006807(nitrogen compound metabolic pro…	ko04016(MAPK signaling pathway - plant)
PC-3p-115095_65	XM_016113537.2	6398	6421	6412	-39.4	-27.2	0.690355	11.5	5-14,6417-6408;17-22,6404-6399	1-4,6421-6418[UP5];15-16,6407-6405[AILt];23-23,6398-6398[UP3]	.((((((...((((((((((....&....))))))))))-..)))))).	UACACAGUACUGGACCCUCCUGUU&AAUCGGAGGGUCCA-AUUUGUGUU	1	30.281	4	0.906536	Output/S0h/cleaveLand_result/t_plot/PC-3p-115095_65_XM_016113537.2_6412_TPlot.pdf	0	0	NA	NA	NA	0	0	NA	NA	NA	30.281	0	0	7.0631e-14	1.09903e-13	yes	NA	NA
PC-3p-115095_65	XM_021128910.1	3098	3120	3111	-39.4	-29.3	0.743655	8.5	3-14,3118-3107;17-21,3104-3100	1-2,3120-3119[UP5];15-16,3106-3105[SIL];22-23,3099-3098[UP3]	..(((((..((((((((((((..&..))))))))))))..)))))..	UUCGCAAUCUGGACCCUCUGAAC&AAUCGGAGGGUCCAAUUUGUGUU	1	30.281	4	0.552897	Output/S0h/cleaveLand_result/t_plot/PC-3p-115095_65_XM_021128910.1_3111_TPlot.pdf	0	0	NA	NA	NA	0	0	NA	NA	NA	30.281	0	0	7.0631e-14	1.09903e-13	yes	NA	ko03015(mRNA surveillance pathway)
PC-3p-115095_65	XM_021128912.1	2580	2602	2593	-39.4	-29.3	0.743655	8.5	3-14,2600-2589;17-21,2586-2582	1-2,2602-2601[UP5];15-16,2588-2587[SIL];22-23,2581-2580[UP3]	..(((((..((((((((((((..&..))))))))))))..)))))..	UUCGCAAUCUGGACCCUCUGAAC&AAUCGGAGGGUCCAAUUUGUGUU	1	30.281	4	0.542787	Output/S0h/cleaveLand_result/t_plot/PC-3p-115095_65_XM_021128912.1_2593_TPlot.pdf	0	0	NA	NA	NA	0	0	NA	NA	NA	30.281	0	0	7.0631e-14	1.09903e-13	yes	NA	ko03015(mRNA surveillance pathway)
PC-3p-115095_65	XM_021134214.1	1549	1571	1562	-39.4	-30.3	0.769036	10	5-17,1567-1555;19-22,1553-1550	1-4,1571-1568[UP5];18-18,1554-1554[SIL];23-23,1549-1549[UP3]	.((((.(((((((((((((....&....))))))))))))).)))).	UGCACCAGUUGGACCCUCCAAUG&AAUCGGAGGGUCCAAUUUGUGUU	0	0	NA	NA	NA	0	0	NA	NA	NA	1	26.8255	4	0.223298	Output/S24h/cleaveLand_result/t_plot/PC-3p-115095_65_XM_021134214.1_1562_TPlot.pdf	0	0	26.8255	2.2374e-12	2.55455e-12	yes	GO:0044237(cellular metabolic process);GO:0009987(cellular process);GO:0006793(phosphorus metabolic process);GO:0016772(transferase activity, transferring phosphorus-containing groups);GO:0016301(kinase activity);GO:0016310(phosphorylation);GO:0008152(metabolic process);GO:0006796(phosphate-containing compound metabolic process);GO:0016740(transferase activity);GO:0003824(catalytic activity);GO:0…	NA
PC-3p-115095_65	XM_021136144.1	925	948	939	-39.4	-25.9	0.65736	9	2-7,947-942;9-13,940-936;16-20,932-928;22-23,926-925	1-1,948-948[UP5];8-8,941-941[SIL];14-15,935-933[AILt];21-21,927-927[SIL]	((.(((((...(((((.((((((.&.)))))).)))))-..))))).))	GAGACAGAGCAGGGCCGUCCGAUC&AAUCGGAGGGUCC-AAUUUGUGUU	1	30.281	4	0.998956	Output/S0h/cleaveLand_result/t_plot/PC-3p-115095_65_XM_021136144.1_939_TPlot.pdf	0	0	NA	NA	NA	0	0	NA	NA	NA	30.281	0	0	7.0631e-14	1.09903e-13	yes	GO:0051603(proteolysis involved in cellular protein catabolic process);GO:0043170(macromolecule metabolic process);GO:1901565(organonitrogen compound catabolic process);GO:0006464(cellular protein modification process);GO:0006807(nitrogen compound metabolic process);GO:0019787(ubiquitin-like protein transferase activity);GO:0044257(cellular protein catabolic process);GO:0000209(protein polyubiqui…	NA
PC-3p-115095_65	XM_021138496.1	3172	3193	3184	-39.4	-27	0.685279	9.5	4-14,3190-3180;16-18,3179-3177;20-23,3175-3172	1-3,3193-3191[UP5];15-15,x-x[BULq];19-19,3176-3176[SIL]	((((.(((-(((((((((((...&...))))))))))).))).))))	GACAGAGG-UGGACCCUCUGGAG&AAUCGGAGGGUCCAAUUUGUGUU	0	0	NA	NA	NA	1	33.3045	4	0.913398	Output/S8h/cleaveLand_result/t_plot/PC-3p-115095_65_XM_021138496.1_3184_TPlot.pdf	0	0	NA	NA	NA	0	33.3045	0	3.4347e-15	7.86611e-15	yes	GO:0003723(RNA binding);GO:0097159(organic cyclic compound binding);GO:1901363(heterocyclic compound binding);GO:0005488(binding);GO:0003676(nucleic acid binding)	ko03013(RNA transport);ko03015(mRNA surveillance pathway)
PC-3p-115095_65	XM_021139246.1	333	354	345	-39.4	-28.8	0.730964	7	1-13,354-342;17-21,339-335	14-16,341-340[AILq];22-23,334-333[UP3]	..(((((..-(((((((((((((&)))))))))))))...)))))..	GCCACGGCG-GGGCCCUCCGAUU&AAUCGGAGGGUCCAAUUUGUGUU	0	0	NA	NA	NA	1	33.3045	4	0.669191	Output/S8h/cleaveLand_result/t_plot/PC-3p-115095_65_XM_021139246.1_345_TPlot.pdf	0	0	NA	NA	NA	0	33.3045	0	3.4347e-15	7.86611e-15	yes	GO:0008270(zinc ion binding);GO:0043167(ion binding);GO:0031224(intrinsic component of membrane);GO:0044425(membrane part);GO:0005488(binding);GO:0046872(metal ion binding);GO:0043169(cation binding);GO:0016021(integral component of membrane);GO:0016020(membrane);GO:0046914(transition metal ion binding)	ko04141(Protein processing in endoplasmic reticulum)
PC-3p-115095_65	XM_021141168.1	212	233	224	-39.4	-28.1	0.713198	9.5	5-19,229-215;21-23,214-212	1-4,233-230[UP5];20-20,x-x[BULq]	(((-(((((((((((((((....&....))))))))))))))).)))	GGC-UAAAUUGGACCCUCCAGUU&AAUCGGAGGGUCCAAUUUGUGUU	0	0	NA	NA	NA	2	66.6089	2	0.380838	Output/S8h/cleaveLand_result/t_plot/PC-3p-115095_65_XM_021141168.1_224_TPlot.pdf	0	0	NA	NA	NA	0	66.6089	0	1.1789e-29	9.89421e-29	yes	GO:0003824(catalytic activity);GO:0016747(transferase activity, transferring acyl groups other than amino-acyl groups);GO:0016746(transferase activity, transferring acyl groups);GO:0016740(transferase activity)	ko00330(Arginine and proline metabolism);ko00944(Flavone and flavonol biosynthesis);ko00943(Isoflavonoid biosynthesis)
PC-3p-115095_65	XM_021142094.1	317	341	331	-39.4	-25.9	0.65736	9.5	3-8,339-334;9-13,332-328;16-19,325-322;20-23,320-317	1-2,341-340[UP5];x-x,333-333[BULt];14-15,327-326[SIL];x-x,321-321[BULt]	((((.((((..(((((.((((((..&..))))))-)))))..))))-))))	GGCGUCAAAGAGGACCUCUCCGAGC&AAUCGGAG-GGUCCAAUUUG-UGUU	0	0	NA	NA	NA	1	33.3045	4	0.998744	Output/S8h/cleaveLand_result/t_plot/PC-3p-115095_65_XM_021142094.1_331_TPlot.pdf	0	0	NA	NA	NA	0	33.3045	0	3.4347e-15	7.86611e-15	yes	NA	NA
PC-3p-116071_65	XM_016077360.2	1331	1354	1345	-37.3	-25.2	0.675603	14.5	7-20,1348-1335;23-24,1332-1331	1-6,1354-1349[UP5];21-22,1334-1333[SIL]	((..((((((((((((((......&......))))))))))))))..))	AGAAUGAGAGGCCAGUGUCUUCCC&AUAAAAAUACUGGCCUCUUAGACU	0	0	NA	NA	NA	0	0	NA	NA	NA	2	53.6509	2	0.264585	Output/S24h/cleaveLand_result/t_plot/PC-3p-116071_65_XM_016077360.2_1345_TPlot.pdf	0	0	53.6509	5.0035e-24	2.27989e-23	yes	GO:0016020(membrane);GO:0044464(cell part);GO:0012505(endomembrane system);GO:0005623(cell)	NA
PC-3p-116071_65	XM_016102029.2	849	872	863	-37.3	-26.4	0.707775	12.5	6-18,867-855;20-23,853-850	1-5,872-868[UP5];19-19,854-854[SIL];24-24,849-849[UP3]	.((((.(((((((((((((.....&.....))))))))))))).)))).	CGUUUCAGAGGCCAGUGUUGUGUA&AUAAAAAUACUGGCCUCUUAGACU	1	30.281	4	0.182285	Output/S0h/cleaveLand_result/t_plot/PC-3p-116071_65_XM_016102029.2_863_TPlot.pdf	0	0	NA	NA	NA	0	0	NA	NA	NA	30.281	0	0	7.0631e-14	1.09903e-13	yes	GO:0046903(secretion);GO:0051640(organelle localization);GO:0006904(vesicle docking involved in exocytosis);GO:0051234(establishment of localization);GO:0048278(vesicle docking);GO:0032940(secretion by cell);GO:0006887(exocytosis);GO:0009987(cellular process);GO:0140056(organelle localization by membrane tethering);GO:0016192(vesicle-mediated transport);GO:0051641(cellular localization);GO:002240…	NA
PC-3p-116071_65	XM_016111913.2	507	531	522	-37.3	-24.5	0.656836	8	2-13,530-519;14-22,517-509	1-1,531-531[UP5];x-x,518-518[BULt];23-24,508-507[UP3]	..(((((((((.((((((((((((.&.))))))))))))-)))))))))..	GUUCUGGGGGGAUCAGUGUUUUUGA&AUAAAAAUACUGG-CCUCUUAGACU	0	0	NA	NA	NA	2	66.6089	3	0.11706	Output/S8h/cleaveLand_result/t_plot/PC-3p-116071_65_XM_016111913.2_522_TPlot.pdf	0	0	NA	NA	NA	0	66.6089	0	1.1789e-29	9.89421e-29	yes	GO:0009058(biosynthetic process);GO:0005829(cytosol);GO:0002181(cytoplasmic translation);GO:0071704(organic substance metabolic process);GO:0044391(ribosomal subunit);GO:0044444(cytoplasmic part);GO:0044249(cellular biosynthetic process);GO:0044464(cell part);GO:0043232(intracellular non-membrane-bounded organelle);GO:0043604(amide biosynthetic process);GO:0043043(peptide biosynthetic process);GO…	ko03010(Ribosome)
PC-3p-117208_64	BGI_novel_T007646	2163	2186	2177	-39.9	-26.8	0.671679	13.5	5-18,2182-2169	1-4,2186-2183[UP5];19-24,2168-2163[UP3]	......((((((((((((((....&....))))))))))))))......	AUUAAGGGCCGAGAGUCGUUCAUA&AUUUAACGACUCUCGGCUAUCAAC	2	60.562	1	0.0472925	Output/S0h/cleaveLand_result/t_plot/PC-3p-117208_64_BGI_novel_T007646_2177_TPlot.pdf	0	0	NA	NA	NA	0	0	NA	NA	NA	60.562	0	0	4.9856e-27	3.03728e-26	yes	GO:0016021(integral component of membrane);GO:0044425(membrane part);GO:0031224(intrinsic component of membrane);GO:0016020(membrane)	NA
PC-3p-117208_64	XM_016082953.2	1213	1238	1229	-39.9	-26.1	0.654135	9.5	1-6,1238-1233;9-15,1230-1224;16-24,1221-1213	7-8,1232-1231[SIL];x-x,1223-1222[BULt]	(((((((((..(((((((..((((((&))))))..)))))))--)))))))))	GUUGAUGGCGACGAGGGUGAUUGGAU&AUUUAACGACUCUCG--GCUAUCAAC	0	0	NA	NA	NA	1	33.3045	4	0.977329	Output/S8h/cleaveLand_result/t_plot/PC-3p-117208_64_XM_016082953.2_1229_TPlot.pdf	0	0	NA	NA	NA	0	33.3045	0	3.4347e-15	7.86611e-15	yes	GO:0016070(RNA metabolic process);GO:0032501(multicellular organismal process);GO:0044424(intracellular part);GO:0048229(gametophyte development);GO:0006139(nucleobase-containing compound metabolic process);GO:0010467(gene expression);GO:0034641(cellular nitrogen compound metabolic process);GO:0008152(metabolic process);GO:0006396(RNA processing);GO:1901360(organic cyclic compound metabolic proce…	ko03008(Ribosome biogenesis in eukaryotes)
PC-3p-117208_64	XM_016087891.2	1647	1670	1661	-39.9	-32.9	0.824561	2.5	1-16,1670-1655;18-24,1653-1647	17-17,1654-1654[SIL]	(((((((.((((((((((((((((&)))))))))))))))).)))))))	GUUGAUAUCUGAGAGUCGUUAGAU&AUUUAACGACUCUCGGCUAUCAAC	4	121.124	2	0.108816	Output/S0h/cleaveLand_result/t_plot/PC-3p-117208_64_XM_016087891.2_1661_TPlot.pdf	1	33.3045	4	0.273197	Output/S8h/cleaveLand_result/t_plot/PC-3p-117208_64_XM_016087891.2_1661_TPlot.pdf	7	187.778	2	0.123404	Output/S24h/cleaveLand_result/t_plot/PC-3p-117208_64_XM_016087891.2_1661_TPlot.pdf	121.124	33.3045	187.778	1.3889e-23	6.30452e-23	yes	GO:0006807(nitrogen compound metabolic process);GO:0006508(proteolysis);GO:0044238(primary metabolic process);GO:0019538(protein metabolic process);GO:0030163(protein catabolic process);GO:1901564(organonitrogen compound metabolic process);GO:0008233(peptidase activity);GO:0003824(catalytic activity);GO:0004175(endopeptidase activity);GO:0070001(aspartic-type peptidase activity);GO:1901565(organo…	ko03010(Ribosome)
PC-3p-117208_64	XM_016100506.2	717	741	732	-39.9	-26.3	0.659148	16	7-14,735-728;15-21,726-720	1-6,741-736[UP5];x-x,727-727[BULt];22-24,719-717[UP3]	...(((((((.((((((((......&......))))))))-)))))))...	UUCGGUGGCCGGAGAGUCGGGACUC&AUUUAACGACUCUC-GGCUAUCAAC	1	30.281	4	0.948896	Output/S0h/cleaveLand_result/t_plot/PC-3p-117208_64_XM_016100506.2_732_TPlot.pdf	1	33.3045	4	0.940949	Output/S8h/cleaveLand_result/t_plot/PC-3p-117208_64_XM_016100506.2_732_TPlot.pdf	0	0	NA	NA	NA	30.281	33.3045	0	1.1203e-07	1.21623e-07	yes	GO:0016020(membrane);GO:0016021(integral component of membrane);GO:0016740(transferase activity);GO:0032259(methylation);GO:0008168(methyltransferase activity);GO:0044425(membrane part);GO:0008152(metabolic process);GO:0016741(transferase activity, transferring one-carbon groups);GO:0031224(intrinsic component of membrane);GO:0003824(catalytic activity)	NA
PC-3p-117208_64	XM_016102742.2	1314	1337	1328	-39.9	-27.4	0.686717	9.5	1-3,1337-1335;5-19,1333-1319	4-4,1334-1334[SIL];20-24,1318-1314[UP3]	.....(((((((((((((((.(((&))).))))))))))))))).....	CGUCUUGGCCGAGGGUCGUUUGAU&AUUUAACGACUCUCGGCUAUCAAC	10	302.81	2	0.556967	Output/S0h/cleaveLand_result/t_plot/PC-3p-117208_64_XM_016102742.2_1328_TPlot.pdf	6	199.827	2	0.536953	Output/S8h/cleaveLand_result/t_plot/PC-3p-117208_64_XM_016102742.2_1328_TPlot.pdf	6	160.953	3	0.233662	Output/S24h/cleaveLand_result/t_plot/PC-3p-117208_64_XM_016102742.2_1328_TPlot.pdf	302.81	199.827	160.953	2.8033e-11	3.13285e-11	yes	GO:0004013(adenosylhomocysteinase activity);GO:0034641(cellular nitrogen compound metabolic process);GO:0044281(small molecule metabolic process);GO:0044238(primary metabolic process);GO:0009116(nucleoside metabolic process);GO:0006534(cysteine metabolic process);GO:0071704(organic substance metabolic process);GO:0046128(purine ribonucleoside metabolic process);GO:0019752(carboxylic acid metaboli…	ko00270(Cysteine and methionine metabolism);ko01100(Metabolic pathways)
PC-3p-117208_64	XM_016112794.2	1982	2005	1996	-39.9	-26.8	0.671679	13.5	5-18,2001-1988	1-4,2005-2002[UP5];19-24,1987-1982[UP3]	......((((((((((((((....&....))))))))))))))......	AUUAAGGGCCGAGAGUCGUUCAUA&AUUUAACGACUCUCGGCUAUCAAC	1	30.281	4	0.925263	Output/S0h/cleaveLand_result/t_plot/PC-3p-117208_64_XM_016112794.2_1996_TPlot.pdf	0	0	NA	NA	NA	1	26.8255	4	0.946672	Output/S24h/cleaveLand_result/t_plot/PC-3p-117208_64_XM_016112794.2_1996_TPlot.pdf	30.281	0	26.8255	5.3891e-07	5.57092e-07	yes	GO:0016021(integral component of membrane);GO:0044425(membrane part);GO:0031224(intrinsic component of membrane);GO:0016020(membrane)	NA
PC-3p-117208_64	XM_021137405.1	412	436	427	-39.9	-26	0.651629	16	8-14,429-423;15-24,421-412	1-7,436-430[UP5];x-x,422-422[BULt]	((((((((((.(((((((.......&.......)))))))-))))))))))	GUUGAUGGCUAGAGGGUCAAUUAGA&AUUUAACGACUCUC-GGCUAUCAAC	1	30.281	4	0.982529	Output/S0h/cleaveLand_result/t_plot/PC-3p-117208_64_XM_021137405.1_427_TPlot.pdf	0	0	NA	NA	NA	0	0	NA	NA	NA	30.281	0	0	7.0631e-14	1.09903e-13	yes	GO:0005840(ribosome);GO:0030529(intracellular ribonucleoprotein complex);GO:0005622(intracellular);GO:0032991(macromolecular complex);GO:0005737(cytoplasm);GO:1990904(ribonucleoprotein complex);GO:0043232(intracellular non-membrane-bounded organelle);GO:0044424(intracellular part);GO:0043229(intracellular organelle);GO:0005623(cell);GO:0044444(cytoplasmic part);GO:0043226(organelle);GO:0044464(ce…	ko03010(Ribosome)
PC-3p-117669_63	BGI_novel_T013996	602	626	617	-38.4	-26	0.677083	6.5	2-14,625-613;15-22,611-604	1-1,626-626[UP5];x-x,612-612[BULt];23-24,603-602[UP3]	..((((((((.(((((((((((((.&.)))))))))))))-))))))))..	CUUGAAGUUGCACUUCGUAUGAAGC&AUUUCAUAUGAAGU-CGACUUCACC	0	0	NA	NA	NA	1	33.3045	4	0.797193	Output/S8h/cleaveLand_result/t_plot/PC-3p-117669_63_BGI_novel_T013996_617_TPlot.pdf	0	0	NA	NA	NA	0	33.3045	0	3.4347e-15	7.86611e-15	yes	GO:0009987(cellular process)	ko03440(Homologous recombination)
PC-3p-117669_63	BGI_novel_T014163	500	523	515	-38.4	-28.3	0.736979	5.5	2-5,522-519;7-13,518-512;14-24,510-500	1-1,523-523[UP5];6-6,x-x[BULq];x-x,511-511[BULt]	(((((((((((.(((((((-((((.&.)))).)))))))-)))))))))))	GGUGGGGUCGGUCUUCAUA-GAAAA&AUUUCAUAUGAAG-UCGACUUCACC	0	0	NA	NA	NA	0	0	NA	NA	NA	2	53.6509	3	0.0841236	Output/S24h/cleaveLand_result/t_plot/PC-3p-117669_63_BGI_novel_T014163_515_TPlot.pdf	0	0	53.6509	5.0035e-24	2.27989e-23	yes	NA	ko01100(Metabolic pathways);ko00190(Oxidative phosphorylation)
PC-3p-117669_63	XM_016081484.2	1194	1219	1209	-38.4	-26.1	0.679688	11.5	3-5,1217-1215;6-9,1213-1210;11-14,1208-1205;15-24,1203-1194	1-2,1219-1218[UP5];x-x,1214-1214[BULt];10-10,1209-1209[SIL];x-x,1204-1204[BULt]	((((((((((.((((.((((.(((..&..)))-)))).))))-))))))))))	GGUGAGGUCGUACUUGGUGUCGGAUG&AUUUC-AUAUGAAGU-CGACUUCACC	0	0	NA	NA	NA	0	0	NA	NA	NA	4	107.302	2	0.47783	Output/S24h/cleaveLand_result/t_plot/PC-3p-117669_63_XM_016081484.2_1209_TPlot.pdf	0	0	107.302	2.4987e-47	7.37574e-46	yes	GO:0016747(transferase activity, transferring acyl groups other than amino-acyl groups);GO:0003824(catalytic activity);GO:0016740(transferase activity);GO:0016746(transferase activity, transferring acyl groups)	NA
PC-3p-117669_63	XM_016096850.2	532	555	546	-38.4	-27.4	0.713542	9.5	3-10,553-546;13-24,543-532	1-2,555-554[UP5];11-12,545-544[SIL]	((((((((((((..((((((((..&..))))))))..))))))))))))	GGUGGGGUUGACAACAUAUGGAUU&AUUUCAUAUGAAGUCGACUUCACC	1	30.281	4	0.755537	Output/S0h/cleaveLand_result/t_plot/PC-3p-117669_63_XM_016096850.2_546_TPlot.pdf	1	33.3045	4	0.738212	Output/S8h/cleaveLand_result/t_plot/PC-3p-117669_63_XM_016096850.2_546_TPlot.pdf	2	53.6509	3	0.146298	Output/S24h/cleaveLand_result/t_plot/PC-3p-117669_63_XM_016096850.2_546_TPlot.pdf	30.281	33.3045	53.6509	0.016019	0.0162024	yes	GO:0008152(metabolic process);GO:0043414(macromolecule methylation);GO:1990259(histone-glutamine methyltransferase activity);GO:0034470(ncRNA processing);GO:0043628(ncRNA 3'-end processing);GO:0018364(peptidyl-glutamine methylation);GO:0031167(rRNA methylation);GO:0042054(histone methyltransferase activity);GO:0031974(membrane-enclosed lumen);GO:0019538(protein metabolic process);GO:0043144(snoRN…	ko03008(Ribosome biogenesis in eukaryotes)
PC-3p-117669_63	XM_021143533.1	525	548	539	-38.4	-27.7	0.721354	9.5	3-10,546-539;13-24,536-525	1-2,548-547[UP5];11-12,538-537[SIL]	((((((((((((..((((((((..&..))))))))..))))))))))))	GGUGGGGUUGACAACAUAUGGAUU&AUUUCAUAUGAAGUCGACUUCACC	0	0	NA	NA	NA	1	33.3045	4	0.689644	Output/S8h/cleaveLand_result/t_plot/PC-3p-117669_63_XM_021143533.1_539_TPlot.pdf	1	26.8255	4	0.750884	Output/S24h/cleaveLand_result/t_plot/PC-3p-117669_63_XM_021143533.1_539_TPlot.pdf	0	33.3045	26.8255	1.7537e-07	1.85914e-07	yes	GO:0008033(tRNA processing);GO:0016072(rRNA metabolic process);GO:0000154(rRNA modification);GO:0031167(rRNA methylation);GO:1990259(histone-glutamine methyltransferase activity);GO:0044446(intracellular organelle part);GO:0031428(box C/D snoRNP complex);GO:0005634(nucleus);GO:0044085(cellular component biogenesis);GO:0006807(nitrogen compound metabolic process);GO:0016740(transferase activity);G…	ko03008(Ribosome biogenesis in eukaryotes)
PC-3p-117903_63	XM_016115252.2	772	795	786	-31.1	-24.1	0.77492	8.5	3-15,793-781;18-24,778-772	1-2,795-794[UP5];16-17,780-779[SIL]	(((((((..(((((((((((((..&..)))))))))))))..)))))))	GGUGUUCCUGUUGUUUUGGUCGAG&AACGAUUAAAAUAAUUAGAACACC	0	0	NA	NA	NA	0	0	NA	NA	NA	1	26.8255	4	0.0961385	Output/S24h/cleaveLand_result/t_plot/PC-3p-117903_63_XM_016115252.2_786_TPlot.pdf	0	0	26.8255	2.2374e-12	2.55455e-12	yes	GO:1901265(nucleoside phosphate binding);GO:0098588(bounding membrane of organelle);GO:0005488(binding);GO:0043227(membrane-bounded organelle);GO:0022857(transmembrane transporter activity);GO:0044446(intracellular organelle part);GO:0009507(chloroplast);GO:0071702(organic substance transport);GO:0044422(organelle part);GO:0097367(carbohydrate derivative binding);GO:0005515(protein binding);GO:00…	NA
PC-3p-118336_63	XM_016111193.2	12249	12274	12265	-43	-31.7	0.737209	9.5	4-19,12271-12256;20-24,12253-12249	1-3,12274-12272[UP5];x-x,12255-12254[BULt]	(((((..((((((((((((((((...&...))))))))))))))))--)))))	GCUCAGUGGUGCAGUUGAUUUGACAU&AAAUCAAGUCGACUGCACC--UGAGU	5	151.405	2	0.135778	Output/S0h/cleaveLand_result/t_plot/PC-3p-118336_63_XM_016111193.2_12265_TPlot.pdf	1	33.3045	4	0.332485	Output/S8h/cleaveLand_result/t_plot/PC-3p-118336_63_XM_016111193.2_12265_TPlot.pdf	0	0	NA	NA	NA	151.405	33.3045	0	2.2228e-45	6.38053e-44	yes	GO:0022618(ribonucleoprotein complex assembly);GO:0005524(ATP binding);GO:0005488(binding);GO:0022607(cellular component assembly);GO:0032559(adenyl ribonucleotide binding);GO:0016887(ATPase activity);GO:0005634(nucleus);GO:0032553(ribonucleotide binding);GO:0035639(purine ribonucleoside triphosphate binding);GO:0044085(cellular component biogenesis);GO:0036094(small molecule binding);GO:0071826(…	ko03008(Ribosome biogenesis in eukaryotes)
PC-3p-118336_63	XM_016113770.2	1641	1664	1654	-43	-29.2	0.67907	5.5	1-6,1664-1659;7-18,1657-1646;20-24,1645-1641	x-x,1658-1658[BULt];19-19,x-x[BULq]	(((((-((((((((((((.((((((&))))))-)))))))))))).)))))	GCUCA-GUGCAGUUGAUUCUGAUUU&AAAUCA-AGUCGACUGCACCUGAGU	1	30.281	4	0.581905	Output/S0h/cleaveLand_result/t_plot/PC-3p-118336_63_XM_016113770.2_1654_TPlot.pdf	0	0	NA	NA	NA	0	0	NA	NA	NA	30.281	0	0	7.0631e-14	1.09903e-13	yes	GO:0070011(peptidase activity, acting on L-amino acid peptides);GO:0008233(peptidase activity);GO:1901564(organonitrogen compound metabolic process);GO:0044238(primary metabolic process);GO:0019538(protein metabolic process);GO:0003824(catalytic activity);GO:0006807(nitrogen compound metabolic process);GO:0016021(integral component of membrane);GO:0016787(hydrolase activity);GO:0004180(carboxypep…	NA
PC-3p-119396_62	BGI_novel_T009318	248	279	262	-37.9	-26.4	0.69657	21	1-7,279-273;8-21,264-251	x-x,272-265[BULt];22-24,250-248[UP3]	...((((((((((((((........(((((((&)))))))--------))))))))))))))...	GGAGGUUCAGUUUGGUUGUCGUCGCUGGGUUU&AAAUCCG--------AACCAAACUGAACCAAU	0	0	NA	NA	NA	0	0	NA	NA	NA	1	26.8255	4	0.757101	Output/S24h/cleaveLand_result/t_plot/PC-3p-119396_62_BGI_novel_T009318_262_TPlot.pdf	0	0	26.8255	2.2374e-12	2.55455e-12	yes	NA	NA
PC-3p-119396_62	BGI_novel_T011434	421	441	433	-37.9	-24.7	0.651715	6	2-6,440-436;8-11,435-432;14-24,431-421	1-1,441-441[UP5];7-7,x-x[BULq];12-13,x-x[BULq]	(((((((((((--((((-(((((.&.))))).))))..)))))))))))	AUUGGUUCAGU--GGUU-GGAUUC&AAAUCCGAACCAAACUGAACCAAU	0	0	NA	NA	NA	0	0	NA	NA	NA	3	80.4764	2	0.788634	Output/S24h/cleaveLand_result/t_plot/PC-3p-119396_62_BGI_novel_T011434_433_TPlot.pdf	0	0	80.4764	1.1184e-35	1.47636e-34	yes	GO:0003824(catalytic activity);GO:0016788(hydrolase activity, acting on ester bonds);GO:0016787(hydrolase activity);GO:0043167(ion binding);GO:0004722(protein serine/threonine phosphatase activity);GO:0005488(binding);GO:0004721(phosphoprotein phosphatase activity);GO:0016791(phosphatase activity);GO:0042578(phosphoric ester hydrolase activity);GO:0043169(cation binding);GO:0046872(metal ion bind…	NA
PC-3p-119396_62	XM_016077837.2	472	495	485	-37.9	-27	0.712401	7	2-8,494-488;10-18,485-477;20-24,476-472	1-1,495-495[UP5];9-9,487-486[AILt];19-19,x-x[BULq]	(((((-(((((((((..(((((((.&.)))))))-.))))))))).)))))	AUUGG-UCAGUUUGGAGUCGGGUUC&AAAUCCGA-ACCAAACUGAACCAAU	3	90.843	3	0.0918986	Output/S0h/cleaveLand_result/t_plot/PC-3p-119396_62_XM_016077837.2_485_TPlot.pdf	2	66.6089	3	0.0858874	Output/S8h/cleaveLand_result/t_plot/PC-3p-119396_62_XM_016077837.2_485_TPlot.pdf	5	134.127	3	0.104587	Output/S24h/cleaveLand_result/t_plot/PC-3p-119396_62_XM_016077837.2_485_TPlot.pdf	90.843	66.6089	134.127	5.9133e-06	6.09466e-06	yes	GO:0036094(small molecule binding);GO:0005515(protein binding);GO:0005488(binding);GO:0006457(protein folding);GO:0032553(ribonucleotide binding);GO:0043168(anion binding);GO:0032559(adenyl ribonucleotide binding);GO:0006950(response to stress);GO:0043167(ion binding);GO:0000166(nucleotide binding);GO:0009987(cellular process);GO:0017076(purine nucleotide binding);GO:0097159(organic cyclic compou…	ko04141(Protein processing in endoplasmic reticulum);ko04626(Plant-pathogen interaction)
PC-3p-119396_62	XM_016079227.2	247	271	262	-37.9	-25	0.659631	10.5	4-6,268-266;8-16,264-256;18-23,253-248	1-3,271-269[UP5];7-7,265-265[SIL];17-17,255-254[AILt];24-24,247-247[UP3]	.((((((..(((((((((.(((...&...))).)))))))))-.)))))).	UUUGGUUGUGGUUUGGUUGGGAGAA&AAAUCCGAACCAAACU-GAACCAAU	1	30.281	4	0.971426	Output/S0h/cleaveLand_result/t_plot/PC-3p-119396_62_XM_016079227.2_262_TPlot.pdf	1	33.3045	4	0.966036	Output/S8h/cleaveLand_result/t_plot/PC-3p-119396_62_XM_016079227.2_262_TPlot.pdf	2	53.6509	3	0.329142	Output/S24h/cleaveLand_result/t_plot/PC-3p-119396_62_XM_016079227.2_262_TPlot.pdf	30.281	33.3045	53.6509	0.016019	0.0162024	yes	GO:0005623(cell);GO:0065007(biological regulation);GO:0050789(regulation of biological process);GO:0009987(cellular process);GO:0065008(regulation of biological quality);GO:0050794(regulation of cellular process);GO:0042592(homeostatic process);GO:0019725(cellular homeostasis);GO:0045454(cell redox homeostasis)	NA
PC-3p-119396_62	XM_016091316.2	419	453	444	-37.9	-27.3	0.720317	27.5	3-12,451-442;13-23,430-420	1-2,453-452[UP5];x-x,441-431[BULt];24-24,419-419[UP3]	.(((((((((((...........((((((((((..&..))))))))))-----------))))))))))).	UUUGGUUCGGUUUGGGAGCGAGGUGGUUCGGGUGG&AAAUCCGAACCA-----------AACUGAACCAAU	0	0	NA	NA	NA	1	33.3045	4	0.581972	Output/S8h/cleaveLand_result/t_plot/PC-3p-119396_62_XM_016091316.2_444_TPlot.pdf	0	0	NA	NA	NA	0	33.3045	0	3.4347e-15	7.86611e-15	yes	GO:0036094(small molecule binding);GO:0000166(nucleotide binding);GO:1901363(heterocyclic compound binding);GO:0004499(N,N-dimethylaniline monooxygenase activity);GO:0050660(flavin adenine dinucleotide binding);GO:0050661(NADP binding);GO:0043168(anion binding);GO:0003824(catalytic activity);GO:0004497(monooxygenase activity);GO:0016705(oxidoreductase activity, acting on paired donors, with incor…	NA
PC-3p-119396_62	XM_016107953.2	999	1024	1015	-37.9	-26.9	0.709763	7.5	1-3,1024-1022;5-13,1020-1012;14-21,1009-1002	4-4,1021-1021[SIL];x-x,1011-1010[BULt];22-24,1001-999[UP3]	...((((((((..(((((((((.(((&))).)))))))))--))))))))...	GUAGGUUCGGUAAUUGGUUCGGUUUU&AAAUCCGAACCAA--ACUGAACCAAU	1	30.281	4	0.67307	Output/S0h/cleaveLand_result/t_plot/PC-3p-119396_62_XM_016107953.2_1015_TPlot.pdf	0	0	NA	NA	NA	0	0	NA	NA	NA	30.281	0	0	7.0631e-14	1.09903e-13	yes	GO:0031224(intrinsic component of membrane);GO:0016020(membrane);GO:0044425(membrane part);GO:0016021(integral component of membrane)	NA
PC-3p-119396_62	XM_016110937.2	1096	1120	1111	-37.9	-25.1	0.662269	10.5	3-12,1118-1109;13-17,1107-1103;19-21,1101-1099	1-2,1120-1119[UP5];x-x,1108-1108[BULt];18-18,1102-1102[SIL];22-24,1098-1096[UP3]	...(((.(((((.((((((((((..&..))))))))))-))))).)))...	AUAGGUCCGGUUCUGGUUCGGGUCG&AAAUCCGAACCA-AACUGAACCAAU	0	0	NA	NA	NA	5	166.522	2	0.643497	Output/S8h/cleaveLand_result/t_plot/PC-3p-119396_62_XM_016110937.2_1111_TPlot.pdf	4	107.302	2	0.712589	Output/S24h/cleaveLand_result/t_plot/PC-3p-119396_62_XM_016110937.2_1111_TPlot.pdf	0	166.522	107.302	1.2447e-34	1.62506e-33	yes	GO:0005488(binding);GO:0046872(metal ion binding);GO:0043167(ion binding);GO:0043169(cation binding)	NA
PC-3p-120365_61	XM_016101238.2	1467	1489	1481	-34.5	-23.5	0.681159	7.5	2-7,1488-1483;10-23,1481-1468	1-1,1489-1489[UP5];8-9,1482-1482[AILq];24-24,1467-1467[UP3]	.((((((((((((((.-((((((.&.))))))..)))))))))))))).	AGUGUGUUGAUUCUUC-UUCAUUG&AAAUGAACUGAGAAUUAACACACA	0	0	NA	NA	NA	0	0	NA	NA	NA	1	26.8255	4	0.261576	Output/S24h/cleaveLand_result/t_plot/PC-3p-120365_61_XM_016101238.2_1481_TPlot.pdf	0	0	26.8255	2.2374e-12	2.55455e-12	yes	NA	ko04120(Ubiquitin mediated proteolysis)
PC-3p-120365_61	XM_016105009.2	1028	1050	1041	-34.5	-22.7	0.657971	11.5	5-10,1046-1041;12-22,1040-1030	1-4,1050-1047[UP5];11-11,x-x[BULq];23-24,1029-1028[UP3]	..(((((((((((-((((((....&....)))))).)))))))))))..	AUUGUGUUGAUUC-CAGUUCUUCC&AAAUGAACUGAGAAUUAACACACA	1	30.281	4	0.542787	Output/S0h/cleaveLand_result/t_plot/PC-3p-120365_61_XM_016105009.2_1041_TPlot.pdf	0	0	NA	NA	NA	0	0	NA	NA	NA	30.281	0	0	7.0631e-14	1.09903e-13	yes	GO:0044267(cellular protein metabolic process);GO:1901564(organonitrogen compound metabolic process);GO:2000112(regulation of cellular macromolecule biosynthetic process);GO:0019538(protein metabolic process);GO:0050896(response to stimulus);GO:0043412(macromolecule modification);GO:0035556(intracellular signal transduction);GO:0016310(phosphorylation);GO:0044444(cytoplasmic part);GO:0003824(cata…	ko04075(Plant hormone signal transduction);ko04016(MAPK signaling pathway - plant)
PC-3p-120365_61	XM_021131032.1	1345	1368	1359	-34.5	-25.7	0.744928	9	5-14,1364-1355;16-24,1353-1345	1-4,1368-1365[UP5];15-15,1354-1354[SIL]	(((((((((.((((((((((....&....)))))))))).)))))))))	UGUGUGUUAUUUUUCAGUUCCUCU&AAAUGAACUGAGAAUUAACACACA	1	30.281	4	0.125551	Output/S0h/cleaveLand_result/t_plot/PC-3p-120365_61_XM_021131032.1_1359_TPlot.pdf	0	0	NA	NA	NA	0	0	NA	NA	NA	30.281	0	0	7.0631e-14	1.09903e-13	yes	GO:0006725(cellular aromatic compound metabolic process);GO:0016788(hydrolase activity, acting on ester bonds);GO:0006807(nitrogen compound metabolic process);GO:0046483(heterocycle metabolic process);GO:0090305(nucleic acid phosphodiester bond hydrolysis);GO:0008152(metabolic process);GO:0003824(catalytic activity);GO:0016787(hydrolase activity);GO:0009987(cellular process);GO:0044237(cellular m…	ko03018(RNA degradation)
PC-3p-121413_60	BGI_novel_T001060	679	698	689	-32.3	-24.8	0.767802	3.5	1-19,698-680	20-20,679-679[UP3]	.(((((((((((((((((((&))))))))))))))))))).	CAGUUUUCUUUGUGUGAAAA&UUUUCACACGGAGAAGACUA	1	30.281	4	0.300761	Output/S0h/cleaveLand_result/t_plot/PC-3p-121413_60_BGI_novel_T001060_689_TPlot.pdf	0	0	NA	NA	NA	1	26.8255	4	0.332567	Output/S24h/cleaveLand_result/t_plot/PC-3p-121413_60_BGI_novel_T001060_689_TPlot.pdf	30.281	0	26.8255	5.3891e-07	5.57092e-07	yes	GO:0006952(defense response);GO:0006950(response to stress);GO:0050896(response to stimulus);GO:0009607(response to biotic stimulus)	NA
PC-3p-121413_60	BGI_novel_T001061	711	730	721	-32.3	-24.8	0.767802	3.5	1-19,730-712	20-20,711-711[UP3]	.(((((((((((((((((((&))))))))))))))))))).	CAGUUUUCUUUGUGUGAAAA&UUUUCACACGGAGAAGACUA	0	0	NA	NA	NA	0	0	NA	NA	NA	1	26.8255	4	0.261576	Output/S24h/cleaveLand_result/t_plot/PC-3p-121413_60_BGI_novel_T001061_721_TPlot.pdf	0	0	26.8255	2.2374e-12	2.55455e-12	yes	GO:0006952(defense response);GO:0006950(response to stress);GO:0050896(response to stimulus);GO:0009607(response to biotic stimulus)	NA
PC-3p-121413_60	BGI_novel_T001062	596	615	606	-32.3	-24.8	0.767802	3.5	1-19,615-597	20-20,596-596[UP3]	.(((((((((((((((((((&))))))))))))))))))).	CAGUUUUCUUUGUGUGAAAA&UUUUCACACGGAGAAGACUA	0	0	NA	NA	NA	0	0	NA	NA	NA	1	26.8255	4	0.297969	Output/S24h/cleaveLand_result/t_plot/PC-3p-121413_60_BGI_novel_T001062_606_TPlot.pdf	0	0	26.8255	2.2374e-12	2.55455e-12	yes	GO:0006952(defense response);GO:0006950(response to stress);GO:0050896(response to stimulus);GO:0009607(response to biotic stimulus)	NA
PC-3p-121413_60	BGI_novel_T001063	596	615	606	-32.3	-24.8	0.767802	3.5	1-19,615-597	20-20,596-596[UP3]	.(((((((((((((((((((&))))))))))))))))))).	CAGUUUUCUUUGUGUGAAAA&UUUUCACACGGAGAAGACUA	0	0	NA	NA	NA	1	33.3045	4	0.318133	Output/S8h/cleaveLand_result/t_plot/PC-3p-121413_60_BGI_novel_T001063_606_TPlot.pdf	0	0	NA	NA	NA	0	33.3045	0	3.4347e-15	7.86611e-15	yes	GO:0050896(response to stimulus);GO:0009607(response to biotic stimulus);GO:0006952(defense response);GO:0006950(response to stress)	NA
PC-3p-121413_60	BGI_novel_T001065	596	615	606	-32.3	-24.8	0.767802	3.5	1-19,615-597	20-20,596-596[UP3]	.(((((((((((((((((((&))))))))))))))))))).	CAGUUUUCUUUGUGUGAAAA&UUUUCACACGGAGAAGACUA	1	30.281	4	0.316222	Output/S0h/cleaveLand_result/t_plot/PC-3p-121413_60_BGI_novel_T001065_606_TPlot.pdf	1	33.3045	4	0.303472	Output/S8h/cleaveLand_result/t_plot/PC-3p-121413_60_BGI_novel_T001065_606_TPlot.pdf	0	0	NA	NA	NA	30.281	33.3045	0	1.1203e-07	1.21623e-07	yes	GO:0050896(response to stimulus);GO:0009607(response to biotic stimulus);GO:0006952(defense response);GO:0006950(response to stress)	NA
PC-3p-121413_60	BGI_novel_T001067	603	622	613	-32.3	-24.8	0.767802	3.5	1-19,622-604	20-20,603-603[UP3]	.(((((((((((((((((((&))))))))))))))))))).	CAGUUUUCUUUGUGUGAAAA&UUUUCACACGGAGAAGACUA	1	30.281	4	0.28495	Output/S0h/cleaveLand_result/t_plot/PC-3p-121413_60_BGI_novel_T001067_613_TPlot.pdf	0	0	NA	NA	NA	2	53.6509	3	0.0369599	Output/S24h/cleaveLand_result/t_plot/PC-3p-121413_60_BGI_novel_T001067_613_TPlot.pdf	30.281	0	53.6509	5.8531e-12	6.61749e-12	yes	GO:0050896(response to stimulus);GO:0009607(response to biotic stimulus);GO:0006952(defense response);GO:0006950(response to stress)	NA
PC-3p-121413_60	BGI_novel_T002717	573	592	583	-32.3	-22.1	0.684211	5.5	1-11,592-582;13-14,580-579;16-20,577-573	12-12,581-581[SIL];15-15,578-578[SIL]	(((((.((.(((((((((((&))))))))))).)).)))))	UGGUCAUCGCUGUGUGGAAA&UUUUCACACGGAGAAGACUA	0	0	NA	NA	NA	2	66.6089	2	0.810494	Output/S8h/cleaveLand_result/t_plot/PC-3p-121413_60_BGI_novel_T002717_583_TPlot.pdf	0	0	NA	NA	NA	0	66.6089	0	1.1789e-29	9.89421e-29	yes	GO:0071704(organic substance metabolic process);GO:0000166(nucleotide binding);GO:0097159(organic cyclic compound binding);GO:0005622(intracellular);GO:0043231(intracellular membrane-bounded organelle);GO:0090304(nucleic acid metabolic process);GO:0030554(adenyl nucleotide binding);GO:0046483(heterocycle metabolic process);GO:0005524(ATP binding);GO:0006260(DNA replication);GO:0017076(purine nucl…	ko03410(Base excision repair);ko03420(Nucleotide excision repair);ko03030(DNA replication);ko03430(Mismatch repair)
PC-3p-121413_60	BGI_novel_T003224	381	400	391	-32.3	-21.9	0.678019	4.5	1-9,400-392;11-15,390-386;17-20,384-381	10-10,391-391[SIL];16-16,385-385[SIL]	((((.(((((.(((((((((&))))))))).))))).))))	UAGUGUUUUUGGUGUGAAAA&UUUUCACACGGAGAAGACUA	0	0	NA	NA	NA	1	33.3045	4	0.995953	Output/S8h/cleaveLand_result/t_plot/PC-3p-121413_60_BGI_novel_T003224_391_TPlot.pdf	0	0	NA	NA	NA	0	33.3045	0	3.4347e-15	7.86611e-15	yes	GO:0097159(organic cyclic compound binding);GO:0000373(Group II intron splicing);GO:0003723(RNA binding);GO:0044238(primary metabolic process);GO:0043170(macromolecule metabolic process);GO:0000375(RNA splicing, via transesterification reactions);GO:0010467(gene expression);GO:0016070(RNA metabolic process);GO:1901360(organic cyclic compound metabolic process);GO:0090304(nucleic acid metabolic pr…	ko03018(RNA degradation)
PC-3p-121413_60	BGI_novel_T005078	2197	2216	2207	-32.3	-21.8	0.674923	8.5	2-6,2215-2211;9-19,2208-2198	1-1,2216-2216[UP5];7-8,2210-2209[SIL];20-20,2197-2197[UP3]	.(((((((((((..(((((.&.)))))..))))))))))).	AAGUUUUCUCCGGAUGGGAC&UUUUCACACGGAGAAGACUA	0	0	NA	NA	NA	1	33.3045	4	0.998037	Output/S8h/cleaveLand_result/t_plot/PC-3p-121413_60_BGI_novel_T005078_2207_TPlot.pdf	0	0	NA	NA	NA	0	33.3045	0	3.4347e-15	7.86611e-15	yes	GO:0005488(binding);GO:0007010(cytoskeleton organization);GO:0003676(nucleic acid binding);GO:0005622(intracellular);GO:2000112(regulation of cellular macromolecule biosynthetic process);GO:0009725(response to hormone);GO:0006996(organelle organization);GO:0065007(biological regulation);GO:0031326(regulation of cellular biosynthetic process);GO:0010033(response to organic substance);GO:0009719(re…	NA
PC-3p-121413_60	BGI_novel_T005212	1318	1341	1332	-32.3	-21	0.650155	11.5	1-8,1341-1334;10-11,1332-1331;12-20,1326-1318	9-9,1333-1333[SIL];x-x,1330-1327[BULt]	(((((((((....((.((((((((&)))))))).))----)))))))))	UGGUCUUCUUGCACCUUGUGAAGA&UUUUCACACGG----AGAAGACUA	0	0	NA	NA	NA	1	33.3045	4	0.999987	Output/S8h/cleaveLand_result/t_plot/PC-3p-121413_60_BGI_novel_T005212_1332_TPlot.pdf	0	0	NA	NA	NA	0	33.3045	0	3.4347e-15	7.86611e-15	yes	NA	ko01110(Biosynthesis of secondary metabolites);ko00860(Porphyrin and chlorophyll metabolism);ko00190(Oxidative phosphorylation);ko01100(Metabolic pathways)
PC-3p-121413_60	BGI_novel_T007975	3638	3661	3648	-32.3	-21.78	0.674303	13.5	2-8,3660-3654;10-19,3648-3639	1-1,3661-3661[UP5];9-9,3653-3649[AILt];20-20,3638-3638[UP3]	.((((((((((.....(((((((.&.)))))))----.)))))))))).	GGGUCUUCUCCACCUAUGUGGAAU&UUUUCACA----CGGAGAAGACUA	0	0	NA	NA	NA	0	0	NA	NA	NA	1	26.8255	4	0.999527	Output/S24h/cleaveLand_result/t_plot/PC-3p-121413_60_BGI_novel_T007975_3648_TPlot.pdf	0	0	26.8255	2.2374e-12	2.55455e-12	yes	GO:0018130(heterocycle biosynthetic process);GO:0016817(hydrolase activity, acting on acid anhydrides);GO:0044464(cell part);GO:0043227(membrane-bounded organelle);GO:0043226(organelle);GO:0032991(macromolecular complex);GO:0033554(cellular response to stress);GO:0097367(carbohydrate derivative binding);GO:0044260(cellular macromolecule metabolic process);GO:0071840(cellular component organizatio…	NA
PC-3p-121413_60	BGI_novel_T009438	697	718	708	-32.3	-22.6	0.69969	6.5	1-9,718-710;10-13,708-705;14-19,703-698	x-x,709-709[BULt];x-x,704-704[BULt];20-20,697-697[UP3]	.((((((.((((.(((((((((&)))))))))-))))-)))))).	CGGUCUUCCUCUGGUGUGAAGA&UUUUCACAC-GGAG-AAGACUA	0	0	NA	NA	NA	0	0	NA	NA	NA	1	26.8255	4	0.971648	Output/S24h/cleaveLand_result/t_plot/PC-3p-121413_60_BGI_novel_T009438_708_TPlot.pdf	0	0	26.8255	2.2374e-12	2.55455e-12	yes	GO:0008152(metabolic process);GO:0044444(cytoplasmic part);GO:0044237(cellular metabolic process);GO:0044434(chloroplast part);GO:0019438(aromatic compound biosynthetic process);GO:0009987(cellular process);GO:0046483(heterocycle metabolic process);GO:0043231(intracellular membrane-bounded organelle);GO:0043167(ion binding);GO:0044422(organelle part);GO:0043094(cellular metabolic compound salvage…	ko01110(Biosynthesis of secondary metabolites);ko00630(Glyoxylate and dicarboxylate metabolism);ko01100(Metabolic pathways);ko00260(Glycine, serine and threonine metabolism);ko01200(Carbon metabolism);ko00561(Glycerolipid metabolism);ko00860(Porphyrin and chlorophyll metabolism)
PC-3p-121413_60	XM_016076477.2	184	204	195	-32.3	-21.9	0.678019	8	2-12,203-193;13-15,191-189;17-18,187-186	1-1,204-204[UP5];x-x,192-192[BULt];16-16,188-188[SIL];19-20,185-184[UP3]	..((.(((.(((((((((((.&.)))))))))))-))).))..	UUGUGUUCUUCCGUGUGGAGC&UUUUCACACGGA-GAAGACUA	0	0	NA	NA	NA	1	33.3045	4	0.994994	Output/S8h/cleaveLand_result/t_plot/PC-3p-121413_60_XM_016076477.2_195_TPlot.pdf	2	53.6509	3	0.464824	Output/S24h/cleaveLand_result/t_plot/PC-3p-121413_60_XM_016076477.2_195_TPlot.pdf	0	33.3045	53.6509	1.0184e-11	1.14021e-11	yes	NA	NA
PC-3p-121413_60	XM_016080261.2	1867	1886	1877	-32.3	-22.9	0.708978	10	5-13,1882-1874;16-19,1871-1868	1-4,1886-1883[UP5];14-15,1873-1872[SIL];20-20,1867-1867[UP3]	.((((..(((((((((....&....)))))))))..)))).	CAGUCGGCUCCGUGUGUCCU&UUUUCACACGGAGAAGACUA	0	0	NA	NA	NA	0	0	NA	NA	NA	3	80.4764	2	0.612602	Output/S24h/cleaveLand_result/t_plot/PC-3p-121413_60_XM_016080261.2_1877_TPlot.pdf	0	0	80.4764	1.1184e-35	1.47636e-34	yes	GO:0009987(cellular process);GO:0005623(cell);GO:1901265(nucleoside phosphate binding);GO:0016020(membrane);GO:0071944(cell periphery);GO:0016818(hydrolase activity, acting on acid anhydrides, in phosphorus-containing anhydrides);GO:0008568(microtubule-severing ATPase activity);GO:1901363(heterocyclic compound binding);GO:0016887(ATPase activity);GO:0032555(purine ribonucleotide binding);GO:00325…	ko04141(Protein processing in endoplasmic reticulum)
PC-3p-121413_60	XM_016080540.2	642	661	652	-32.3	-24.2	0.749226	5.5	2-8,660-654;10-20,652-642	1-1,661-661[UP5];9-9,653-653[SIL]	(((((((((((.(((((((.&.))))))).)))))))))))	UGGUCUUCUCUUUGUGGAAC&UUUUCACACGGAGAAGACUA	0	0	NA	NA	NA	1	33.3045	4	0.493761	Output/S8h/cleaveLand_result/t_plot/PC-3p-121413_60_XM_016080540.2_652_TPlot.pdf	1	26.8255	4	0.554534	Output/S24h/cleaveLand_result/t_plot/PC-3p-121413_60_XM_016080540.2_652_TPlot.pdf	0	33.3045	26.8255	1.7537e-07	1.85914e-07	yes	GO:0016747(transferase activity, transferring acyl groups other than amino-acyl groups);GO:0016746(transferase activity, transferring acyl groups);GO:0003824(catalytic activity);GO:0016740(transferase activity)	ko00943(Isoflavonoid biosynthesis);ko00944(Flavone and flavonol biosynthesis);ko00330(Arginine and proline metabolism)
PC-3p-121413_60	XM_016081466.2	1219	1238	1229	-32.3	-22.3	0.690402	5	2-10,1237-1229;12-20,1227-1219	1-1,1238-1238[UP5];11-11,1228-1228[SIL]	(((((((((.(((((((((.&.))))))))).)))))))))	UGGUUUUCUACGUGUGGAAC&UUUUCACACGGAGAAGACUA	3	90.843	2	0.769369	Output/S0h/cleaveLand_result/t_plot/PC-3p-121413_60_XM_016081466.2_1229_TPlot.pdf	1	33.3045	4	0.982806	Output/S8h/cleaveLand_result/t_plot/PC-3p-121413_60_XM_016081466.2_1229_TPlot.pdf	0	0	NA	NA	NA	90.843	33.3045	0	6.8207e-23	3.0376e-22	yes	GO:0004659(prenyltransferase activity);GO:0043227(membrane-bounded organelle);GO:0009507(chloroplast);GO:0005737(cytoplasm);GO:0043229(intracellular organelle);GO:0003824(catalytic activity);GO:0005623(cell);GO:0044424(intracellular part);GO:0044444(cytoplasmic part);GO:0016765(transferase activity, transferring alkyl or aryl (other than methyl) groups);GO:0009536(plastid);GO:0005622(intracellula…	ko01110(Biosynthesis of secondary metabolites);ko00130(Ubiquinone and other terpenoid-quinone biosynthesis);ko01100(Metabolic pathways)
PC-3p-121413_60	XM_016082338.2	247	265	256	-32.3	-21	0.650155	7.5	1-5,265-261;7-11,259-255;13-20,254-247	6-6,260-260[SIL];12-12,x-x[BULq]	((((((((-(((((.(((((&))))).))))).))))))))	UGGUCUUC-CUGUGGGGAGA&UUUUCACACGGAGAAGACUA	0	0	NA	NA	NA	0	0	NA	NA	NA	1	26.8255	4	0.999999	Output/S24h/cleaveLand_result/t_plot/PC-3p-121413_60_XM_016082338.2_256_TPlot.pdf	0	0	26.8255	2.2374e-12	2.55455e-12	yes	NA	NA
PC-3p-121413_60	XM_016082339.2	642	660	651	-32.3	-21	0.650155	7.5	1-5,660-656;7-11,654-650;13-20,649-642	6-6,655-655[SIL];12-12,x-x[BULq]	((((((((-(((((.(((((&))))).))))).))))))))	UGGUCUUC-CUGUGGGGAGA&UUUUCACACGGAGAAGACUA	0	0	NA	NA	NA	0	0	NA	NA	NA	2	53.6509	2	0.987383	Output/S24h/cleaveLand_result/t_plot/PC-3p-121413_60_XM_016082339.2_651_TPlot.pdf	0	0	53.6509	5.0035e-24	2.27989e-23	yes	NA	NA
PC-3p-121413_60	XM_016086460.1	1149	1170	1159	-32.3	-22	0.681115	8	2-6,1169-1165;7-8,1163-1162;9-19,1160-1150	1-1,1170-1170[UP5];x-x,1164-1164[BULt];x-x,1161-1161[BULt];20-20,1149-1149[UP3]	.(((((((((((.((.(((((.&.)))))-))-))))))))))).	GGGUUUUCUCCGAUGAUGAGAG&UUUUCA-CA-CGGAGAAGACUA	3	90.843	2	0.848831	Output/S0h/cleaveLand_result/t_plot/PC-3p-121413_60_XM_016086460.1_1159_TPlot.pdf	6	199.827	2	0.832507	Output/S8h/cleaveLand_result/t_plot/PC-3p-121413_60_XM_016086460.1_1159_TPlot.pdf	10	268.255	2	0.884677	Output/S24h/cleaveLand_result/t_plot/PC-3p-121413_60_XM_016086460.1_1159_TPlot.pdf	90.843	199.827	268.255	2.1606e-19	8.98974e-19	yes	NA	NA
PC-3p-121413_60	XM_016087307.2	583	605	593	-32.3	-21.6	0.668731	9	2-6,604-600;7-9,598-596;10-18,593-585	1-1,605-605[UP5];x-x,599-599[BULt];x-x,595-594[BULt];19-20,584-583[UP3]	..(((((((((..(((.(((((.&.)))))-)))--)))))))))..	GUGUCUUCUCCAGGUGUUGAAAG&UUUUCA-CAC--GGAGAAGACUA	0	0	NA	NA	NA	1	33.3045	4	0.999403	Output/S8h/cleaveLand_result/t_plot/PC-3p-121413_60_XM_016087307.2_593_TPlot.pdf	0	0	NA	NA	NA	0	33.3045	0	3.4347e-15	7.86611e-15	yes	NA	NA
PC-3p-121413_60	XM_016091424.2	512	530	522	-32.3	-22.3	0.690402	6	2-5,529-526;7-17,525-515	1-1,530-530[UP5];6-6,x-x[BULq];18-20,514-512[UP3]	...(((((((((((-((((.&.)))).)))))))))))...	UACUCUUCUCCGUG-GAAAC&UUUUCACACGGAGAAGACUA	1	30.281	4	0.987783	Output/S0h/cleaveLand_result/t_plot/PC-3p-121413_60_XM_016091424.2_522_TPlot.pdf	0	0	NA	NA	NA	0	0	NA	NA	NA	30.281	0	0	7.0631e-14	1.09903e-13	yes	GO:0009987(cellular process);GO:0006807(nitrogen compound metabolic process);GO:0005488(binding);GO:0005623(cell);GO:0043412(macromolecule modification);GO:0044464(cell part);GO:0005737(cytoplasm);GO:0019538(protein metabolic process);GO:0005622(intracellular);GO:0044260(cellular macromolecule metabolic process);GO:0006464(cellular protein modification process);GO:0043170(macromolecule metabolic …	NA
PC-3p-121413_60	XM_016092686.2	78	97	88	-32.3	-21	0.650155	11	5-17,93-81	1-4,97-94[UP5];18-20,80-78[UP3]	...(((((((((((((....&....)))))))))))))...	UCUUCUUCUCUGUGUGCGUC&UUUUCACACGGAGAAGACUA	0	0	NA	NA	NA	0	0	NA	NA	NA	1	26.8255	4	0.999997	Output/S24h/cleaveLand_result/t_plot/PC-3p-121413_60_XM_016092686.2_88_TPlot.pdf	0	0	26.8255	2.2374e-12	2.55455e-12	yes	NA	NA
PC-3p-121413_60	XM_016095001.2	653	672	663	-32.3	-21.7	0.671827	12	6-18,667-655	1-5,672-668[UP5];19-20,654-653[UP3]	..(((((((((((((.....&.....)))))))))))))..	CUGUCUUCUCUGUGUUCCUC&UUUUCACACGGAGAAGACUA	0	0	NA	NA	NA	0	0	NA	NA	NA	1	26.8255	4	0.999651	Output/S24h/cleaveLand_result/t_plot/PC-3p-121413_60_XM_016095001.2_663_TPlot.pdf	0	0	26.8255	2.2374e-12	2.55455e-12	yes	GO:0016020(membrane);GO:0031224(intrinsic component of membrane);GO:0016021(integral component of membrane);GO:0044425(membrane part)	NA
PC-3p-121413_60	XM_016096280.2	572	591	582	-32.3	-22.1	0.684211	5.5	1-11,591-581;13-14,579-578;16-20,576-572	12-12,580-580[SIL];15-15,577-577[SIL]	(((((.((.(((((((((((&))))))))))).)).)))))	UGGUCAUCGCUGUGUGGAAA&UUUUCACACGGAGAAGACUA	0	0	NA	NA	NA	1	33.3045	4	0.992813	Output/S8h/cleaveLand_result/t_plot/PC-3p-121413_60_XM_016096280.2_582_TPlot.pdf	0	0	NA	NA	NA	0	33.3045	0	3.4347e-15	7.86611e-15	yes	GO:0043167(ion binding);GO:0046872(metal ion binding);GO:0043169(cation binding);GO:0005488(binding);GO:1902456(regulation of stomatal opening);GO:0050789(regulation of biological process);GO:0046914(transition metal ion binding);GO:0010119(regulation of stomatal movement);GO:0065007(biological regulation);GO:0050794(regulation of cellular process);GO:0008270(zinc ion binding)	ko04120(Ubiquitin mediated proteolysis)
PC-3p-121413_60	XM_016096782.2	659	678	669	-32.3	-22.3	0.690402	8	3-7,676-672;9-17,670-662	1-2,678-677[UP5];8-8,671-671[SIL];18-20,661-659[UP3]	...(((((((((.(((((..&..))))).)))))))))...	UGUUCUUCUCCGCGUGAACU&UUUUCACACGGAGAAGACUA	1	30.281	4	0.987507	Output/S0h/cleaveLand_result/t_plot/PC-3p-121413_60_XM_016096782.2_669_TPlot.pdf	0	0	NA	NA	NA	0	0	NA	NA	NA	30.281	0	0	7.0631e-14	1.09903e-13	yes	NA	NA
PC-3p-121413_60	XM_016096854.2	232	252	242	-32.3	-21.2	0.656347	7	1-6,252-247;7-14,245-238;16-18,236-234	x-x,246-246[BULt];15-15,237-237[SIL];19-20,233-232[UP3]	..(((.((((((((.((((((&))))))-)))))))).)))..	UUGUCCUCUCUGUGCUGAAGA&UUUUCA-CACGGAGAAGACUA	0	0	NA	NA	NA	0	0	NA	NA	NA	1	26.8255	4	0.999985	Output/S24h/cleaveLand_result/t_plot/PC-3p-121413_60_XM_016096854.2_242_TPlot.pdf	0	0	26.8255	2.2374e-12	2.55455e-12	yes	GO:1901265(nucleoside phosphate binding);GO:0000166(nucleotide binding);GO:0003676(nucleic acid binding);GO:0097159(organic cyclic compound binding);GO:0005488(binding);GO:1901363(heterocyclic compound binding);GO:0046914(transition metal ion binding);GO:0043169(cation binding);GO:0046872(metal ion binding);GO:0043167(ion binding);GO:0008270(zinc ion binding);GO:0036094(small molecule binding);GO…	ko03018(RNA degradation)
PC-3p-121413_60	XM_016097602.2	799	819	809	-32.3	-21.6	0.668731	9	2-6,818-814;7-9,812-810;11-18,808-801	1-1,819-819[UP5];x-x,813-813[BULt];10-10,809-809[SIL];19-20,800-799[UP3]	..((((((((.(((.(((((.&.)))))-))).))))))))..	GCGUCUUCUCGGUGCUGAGGU&UUUUCA-CACGGAGAAGACUA	1	30.281	4	0.999543	Output/S0h/cleaveLand_result/t_plot/PC-3p-121413_60_XM_016097602.2_809_TPlot.pdf	1	33.3045	4	0.999337	Output/S8h/cleaveLand_result/t_plot/PC-3p-121413_60_XM_016097602.2_809_TPlot.pdf	2	53.6509	2	0.951224	Output/S24h/cleaveLand_result/t_plot/PC-3p-121413_60_XM_016097602.2_809_TPlot.pdf	30.281	33.3045	53.6509	0.016019	0.0162024	yes	GO:0044283(small molecule biosynthetic process);GO:0009308(amine metabolic process);GO:0046219(indolalkylamine biosynthetic process);GO:0046483(heterocycle metabolic process);GO:0016835(carbon-oxygen lyase activity);GO:0006568(tryptophan metabolic process);GO:0006725(cellular aromatic compound metabolic process);GO:0071704(organic substance metabolic process);GO:0046394(carboxylic acid biosynthet…	ko01100(Metabolic pathways);ko00260(Glycine, serine and threonine metabolism);ko01230(Biosynthesis of amino acids);ko01110(Biosynthesis of secondary metabolites);ko00400(Phenylalanine, tyrosine and tryptophan biosynthesis)
PC-3p-121413_60	XM_016100109.2	673	693	684	-32.3	-21.3	0.659443	5.5	1-7,693-687;9-16,685-678;17-20,676-673	8-8,686-686[SIL];x-x,677-677[BULt]	((((.((((((((.(((((((&))))))).))))))))-))))	UAGUACUUCUUCGAGUGAGAG&UUUUCACACGGAGAAG-ACUA	0	0	NA	NA	NA	1	33.3045	4	0.999896	Output/S8h/cleaveLand_result/t_plot/PC-3p-121413_60_XM_016100109.2_684_TPlot.pdf	0	0	NA	NA	NA	0	33.3045	0	3.4347e-15	7.86611e-15	yes	GO:0016818(hydrolase activity, acting on acid anhydrides, in phosphorus-containing anhydrides);GO:0043170(macromolecule metabolic process);GO:1901363(heterocyclic compound binding);GO:0044464(cell part);GO:0004386(helicase activity);GO:1901360(organic cyclic compound metabolic process);GO:0006807(nitrogen compound metabolic process);GO:0005622(intracellular);GO:0032555(purine ribonucleotide bindi…	NA
PC-3p-121413_60	XM_016101719.2	2431	2450	2441	-32.3	-24.5	0.758514	4.5	1-8,2450-2443;10-20,2441-2431	9-9,2442-2442[SIL]	(((((((((((.((((((((&)))))))).)))))))))))	UGGUUUUCUCCUUGUGAGAG&UUUUCACACGGAGAAGACUA	2	60.562	2	0.193498	Output/S0h/cleaveLand_result/t_plot/PC-3p-121413_60_XM_016101719.2_2441_TPlot.pdf	1	33.3045	4	0.448798	Output/S8h/cleaveLand_result/t_plot/PC-3p-121413_60_XM_016101719.2_2441_TPlot.pdf	1	26.8255	4	0.507152	Output/S24h/cleaveLand_result/t_plot/PC-3p-121413_60_XM_016101719.2_2441_TPlot.pdf	60.562	33.3045	26.8255	0.00034661	0.000353265	yes	GO:0003825(alpha,alpha-trehalose-phosphate synthase (UDP-forming) activity);GO:0016791(phosphatase activity);GO:0005984(disaccharide metabolic process);GO:0005975(carbohydrate metabolic process);GO:0034637(cellular carbohydrate biosynthetic process);GO:0016051(carbohydrate biosynthetic process);GO:0006796(phosphate-containing compound metabolic process);GO:0004805(trehalose-phosphatase activity);…	ko01100(Metabolic pathways);ko00500(Starch and sucrose metabolism)
PC-3p-121413_60	XM_016102109.2	1709	1733	1719	-32.3	-21.6	0.668731	17	3-9,1731-1725;10-18,1719-1711	1-2,1733-1732[UP5];x-x,1724-1720[BULt];19-20,1710-1709[UP3]	..(((((((((.....(((((((..&..)))))))-----)))))))))..	UUGUCUUCUCCACGGAGUGUGGGUU&UUUUCACAC-----GGAGAAGACUA	1	30.281	4	0.999573	Output/S0h/cleaveLand_result/t_plot/PC-3p-121413_60_XM_016102109.2_1719_TPlot.pdf	0	0	NA	NA	NA	0	0	NA	NA	NA	30.281	0	0	7.0631e-14	1.09903e-13	yes	GO:0016020(membrane)	NA
PC-3p-121413_60	XM_016103125.2	552	572	562	-32.3	-21.1	0.653251	11	4-7,569-566;9-20,563-552	1-3,572-570[UP5];8-8,565-564[AILt]	((((((((((((..((((...&...))))-.))))))))))))	UGGUUUUCUCCGCCGUGGCCU&UUUUCAC-ACGGAGAAGACUA	0	0	NA	NA	NA	1	33.3045	4	0.999953	Output/S8h/cleaveLand_result/t_plot/PC-3p-121413_60_XM_016103125.2_562_TPlot.pdf	1	26.8255	4	0.999993	Output/S24h/cleaveLand_result/t_plot/PC-3p-121413_60_XM_016103125.2_562_TPlot.pdf	0	33.3045	26.8255	1.7537e-07	1.85914e-07	yes	GO:0016020(membrane);GO:0016021(integral component of membrane);GO:0044425(membrane part);GO:0031224(intrinsic component of membrane)	NA
PC-3p-121413_60	XM_016103668.2	559	578	569	-32.3	-21.5	0.665635	8	1-13,578-566	14-20,565-559[UP3]	.......(((((((((((((&))))))))))))).......	CAUGUGGCUCCGUGUGAGAA&UUUUCACACGGAGAAGACUA	0	0	NA	NA	NA	2	66.6089	1	0.148343	Output/S8h/cleaveLand_result/t_plot/PC-3p-121413_60_XM_016103668.2_569_TPlot.pdf	0	0	NA	NA	NA	0	66.6089	0	1.1789e-29	9.89421e-29	yes	GO:0016757(transferase activity, transferring glycosyl groups);GO:0003824(catalytic activity);GO:0016740(transferase activity)	NA
PC-3p-121413_60	XM_016103671.2	756	775	766	-32.3	-21.5	0.665635	8	1-13,775-763	14-20,762-756[UP3]	.......(((((((((((((&))))))))))))).......	CAUGUGGCUCCGUGUGAGAA&UUUUCACACGGAGAAGACUA	0	0	NA	NA	NA	0	0	NA	NA	NA	1	26.8255	4	0.999932	Output/S24h/cleaveLand_result/t_plot/PC-3p-121413_60_XM_016103671.2_766_TPlot.pdf	0	0	26.8255	2.2374e-12	2.55455e-12	yes	GO:0016757(transferase activity, transferring glycosyl groups);GO:0003824(catalytic activity);GO:0016740(transferase activity)	NA
PC-3p-121413_60	XM_016103675.2	711	730	721	-32.3	-21.5	0.665635	8	1-13,730-718	14-20,717-711[UP3]	.......(((((((((((((&))))))))))))).......	CAUGUGGCUCCGUGUGAGAA&UUUUCACACGGAGAAGACUA	1	30.281	4	0.999809	Output/S0h/cleaveLand_result/t_plot/PC-3p-121413_60_XM_016103675.2_721_TPlot.pdf	0	0	NA	NA	NA	0	0	NA	NA	NA	30.281	0	0	7.0631e-14	1.09903e-13	yes	GO:0016757(transferase activity, transferring glycosyl groups);GO:0003824(catalytic activity);GO:0016740(transferase activity)	NA
PC-3p-121413_60	XM_016104760.2	454	473	464	-32.3	-21.1	0.653251	7.5	1-10,473-464;12-17,462-457	11-11,463-463[SIL];18-20,456-454[UP3]	...((((((.((((((((((&)))))))))).))))))...	AUAUCUUCUGUGUGUGAAGG&UUUUCACACGGAGAAGACUA	1	30.281	4	0.999973	Output/S0h/cleaveLand_result/t_plot/PC-3p-121413_60_XM_016104760.2_464_TPlot.pdf	0	0	NA	NA	NA	1	26.8255	4	0.999993	Output/S24h/cleaveLand_result/t_plot/PC-3p-121413_60_XM_016104760.2_464_TPlot.pdf	30.281	0	26.8255	5.3891e-07	5.57092e-07	yes	GO:0016829(lyase activity);GO:0003824(catalytic activity);GO:0004609(phosphatidylserine decarboxylase activity);GO:0016831(carboxy-lyase activity);GO:0016830(carbon-carbon lyase activity)	ko04144(Endocytosis)
PC-3p-121413_60	XM_016106971.2	416	436	427	-32.3	-22.4	0.693498	9	4-14,433-423;15-19,421-417	1-3,436-434[UP5];x-x,422-422[BULt];20-20,416-416[UP3]	.(((((.(((((((((((...&...)))))))))))-))))).	CGGUCUAUUUCCGUGUGGCAA&UUUUCACACGGAGA-AGACUA	0	0	NA	NA	NA	1	33.3045	4	0.977806	Output/S8h/cleaveLand_result/t_plot/PC-3p-121413_60_XM_016106971.2_427_TPlot.pdf	1	26.8255	4	0.989147	Output/S24h/cleaveLand_result/t_plot/PC-3p-121413_60_XM_016106971.2_427_TPlot.pdf	0	33.3045	26.8255	1.7537e-07	1.85914e-07	yes	NA	ko04626(Plant-pathogen interaction)
PC-3p-121413_60	XM_016108187.2	3510	3530	3521	-32.3	-21.5	0.665635	8.5	4-11,3527-3520;12-16,3518-3514;18-20,3512-3510	1-3,3530-3528[UP5];x-x,3519-3519[BULt];17-17,3513-3513[SIL]	(((.(((((.((((((((...&...))))))))-))))).)))	UGGACUUCUGCCGUGUGAUGC&UUUUCACACGG-AGAAGACUA	0	0	NA	NA	NA	0	0	NA	NA	NA	1	26.8255	4	0.999929	Output/S24h/cleaveLand_result/t_plot/PC-3p-121413_60_XM_016108187.2_3521_TPlot.pdf	0	0	26.8255	2.2374e-12	2.55455e-12	yes	NA	NA
PC-3p-121413_60	XM_016109773.2	1017	1034	1026	-32.3	-23.4	0.724458	5.5	1-7,1034-1028;9-11,1027-1025;13-20,1024-1017	8-8,x-x[BULq];12-12,x-x[BULq]	((((((((-(((-(((((((&))))))).))).))))))))	UGGUCUUC-CCG-GUGAGAA&UUUUCACACGGAGAAGACUA	0	0	NA	NA	NA	0	0	NA	NA	NA	2	53.6509	2	0.534159	Output/S24h/cleaveLand_result/t_plot/PC-3p-121413_60_XM_016109773.2_1026_TPlot.pdf	0	0	53.6509	5.0035e-24	2.27989e-23	yes	GO:0016020(membrane)	NA
PC-3p-121413_60	XM_016110631.2	837	858	847	-32.3	-21.1	0.653251	10	3-9,856-850;10-17,847-840	1-2,858-857[UP5];x-x,849-848[BULt];18-20,839-837[UP3]	...((((((((..(((((((..&..)))))))--))))))))...	UCUUCUUCUCCAUGUGUGAAUG&UUUUCACAC--GGAGAAGACUA	0	0	NA	NA	NA	0	0	NA	NA	NA	1	26.8255	4	0.999993	Output/S24h/cleaveLand_result/t_plot/PC-3p-121413_60_XM_016110631.2_847_TPlot.pdf	0	0	26.8255	2.2374e-12	2.55455e-12	yes	GO:0016787(hydrolase activity);GO:0003824(catalytic activity);GO:0005975(carbohydrate metabolic process);GO:0052692(raffinose alpha-galactosidase activity);GO:0071704(organic substance metabolic process);GO:0004557(alpha-galactosidase activity);GO:0015925(galactosidase activity);GO:0044238(primary metabolic process);GO:0004553(hydrolase activity, hydrolyzing O-glycosyl compounds);GO:0016798(hydro…	ko00600(Sphingolipid metabolism);ko01100(Metabolic pathways);ko00052(Galactose metabolism);ko00603(Glycosphingolipid biosynthesis - globo and isoglobo series);ko00561(Glycerolipid metabolism)
PC-3p-121413_60	XM_016111080.2	123	142	133	-32.3	-21	0.650155	11	5-17,138-126	1-4,142-139[UP5];18-20,125-123[UP3]	...(((((((((((((....&....)))))))))))))...	UCUUCUUCUCUGUGUGCGUC&UUUUCACACGGAGAAGACUA	0	0	NA	NA	NA	0	0	NA	NA	NA	1	26.8255	4	0.999999	Output/S24h/cleaveLand_result/t_plot/PC-3p-121413_60_XM_016111080.2_133_TPlot.pdf	0	0	26.8255	2.2374e-12	2.55455e-12	yes	NA	NA
PC-3p-121413_60	XM_016113896.2	560	579	569	-32.3	-21.1	0.653251	7.5	1-7,579-573;9-16,570-563;18-19,562-561	8-8,572-571[AILt];17-17,x-x[BULq];20-20,560-560[UP3]	.((-((((((((..(((((((&)))))))-.)))))))).)).	CAG-CUUCUCCGGCGUGGAAG&UUUUCAC-ACGGAGAAGACUA	0	0	NA	NA	NA	1	33.3045	4	0.999966	Output/S8h/cleaveLand_result/t_plot/PC-3p-121413_60_XM_016113896.2_569_TPlot.pdf	0	0	NA	NA	NA	0	33.3045	0	3.4347e-15	7.86611e-15	yes	NA	NA
PC-3p-121413_60	XM_016114480.2	287	305	297	-32.3	-21.7	0.671827	5	1-8,305-298;10-20,297-287	9-9,x-x[BULq]	(((((((((((-((((((((&)))))))).)))))))))))	UGGUUUUCUUC-UGUGAAGA&UUUUCACACGGAGAAGACUA	1	30.281	4	0.999466	Output/S0h/cleaveLand_result/t_plot/PC-3p-121413_60_XM_016114480.2_297_TPlot.pdf	0	0	NA	NA	NA	0	0	NA	NA	NA	30.281	0	0	7.0631e-14	1.09903e-13	yes	NA	ko03015(mRNA surveillance pathway)
PC-3p-121413_60	XM_016114481.2	287	305	297	-32.3	-21.7	0.671827	5	1-8,305-298;10-20,297-287	9-9,x-x[BULq]	(((((((((((-((((((((&)))))))).)))))))))))	UGGUUUUCUUC-UGUGAAGA&UUUUCACACGGAGAAGACUA	1	30.281	4	0.999202	Output/S0h/cleaveLand_result/t_plot/PC-3p-121413_60_XM_016114481.2_297_TPlot.pdf	0	0	NA	NA	NA	0	0	NA	NA	NA	30.281	0	0	7.0631e-14	1.09903e-13	yes	NA	ko03015(mRNA surveillance pathway)
PC-3p-121413_60	XM_016117021.2	1060	1080	1071	-32.3	-23.8	0.736842	7.5	2-12,1079-1069;14-19,1066-1061	1-1,1080-1080[UP5];13-13,1068-1067[AILt];20-20,1060-1060[UP3]	.((((((..(((((((((((.&.)))))))))))-.)))))).	GGGUCUUGAUCCGUGUGGAGU&UUUUCACACGGA-GAAGACUA	0	0	NA	NA	NA	2	66.6089	2	0.334192	Output/S8h/cleaveLand_result/t_plot/PC-3p-121413_60_XM_016117021.2_1071_TPlot.pdf	0	0	NA	NA	NA	0	66.6089	0	1.1789e-29	9.89421e-29	yes	GO:0031224(intrinsic component of membrane);GO:0044425(membrane part);GO:0016021(integral component of membrane);GO:0016020(membrane)	NA
PC-3p-121413_60	XM_021124575.1	74	92	84	-32.3	-21.7	0.671827	5	1-8,92-85;10-20,84-74	9-9,x-x[BULq]	(((((((((((-((((((((&)))))))).)))))))))))	UGGUUUUCUUC-UGUGAAGA&UUUUCACACGGAGAAGACUA	1	30.281	4	0.999219	Output/S0h/cleaveLand_result/t_plot/PC-3p-121413_60_XM_021124575.1_84_TPlot.pdf	0	0	NA	NA	NA	0	0	NA	NA	NA	30.281	0	0	7.0631e-14	1.09903e-13	yes	NA	ko03015(mRNA surveillance pathway)
PC-3p-121413_60	XM_021124576.1	74	92	84	-32.3	-21.7	0.671827	5	1-8,92-85;10-20,84-74	9-9,x-x[BULq]	(((((((((((-((((((((&)))))))).)))))))))))	UGGUUUUCUUC-UGUGAAGA&UUUUCACACGGAGAAGACUA	0	0	NA	NA	NA	0	0	NA	NA	NA	1	26.8255	4	0.999623	Output/S24h/cleaveLand_result/t_plot/PC-3p-121413_60_XM_021124576.1_84_TPlot.pdf	0	0	26.8255	2.2374e-12	2.55455e-12	yes	NA	ko03015(mRNA surveillance pathway)
PC-3p-121413_60	XM_021125706.1	3673	3696	3683	-32.3	-21.78	0.674303	13.5	2-8,3695-3689;10-19,3683-3674	1-1,3696-3696[UP5];9-9,3688-3684[AILt];20-20,3673-3673[UP3]	.((((((((((.....(((((((.&.)))))))----.)))))))))).	GGGUCUUCUCCACCUAUGUGGAAU&UUUUCACA----CGGAGAAGACUA	0	0	NA	NA	NA	1	33.3045	4	0.998379	Output/S8h/cleaveLand_result/t_plot/PC-3p-121413_60_XM_021125706.1_3683_TPlot.pdf	0	0	NA	NA	NA	0	33.3045	0	3.4347e-15	7.86611e-15	yes	GO:0018130(heterocycle biosynthetic process);GO:0016817(hydrolase activity, acting on acid anhydrides);GO:0044464(cell part);GO:0043227(membrane-bounded organelle);GO:0043226(organelle);GO:0032991(macromolecular complex);GO:0033554(cellular response to stress);GO:0097367(carbohydrate derivative binding);GO:0044260(cellular macromolecule metabolic process);GO:0071840(cellular component organizatio…	NA
PC-3p-121413_60	XM_021130041.1	1212	1232	1222	-32.3	-21.6	0.668731	6.5	1-6,1232-1227;7-15,1225-1217;17-19,1215-1213	x-x,1226-1226[BULt];16-16,1216-1216[SIL];20-20,1212-1212[UP3]	.(((.(((((((((.((((((&))))))-))))))))).))).	GGGUGUUUUCCGUGCUGGAAG&UUUUCA-CACGGAGAAGACUA	0	0	NA	NA	NA	1	33.3045	4	0.999262	Output/S8h/cleaveLand_result/t_plot/PC-3p-121413_60_XM_021130041.1_1222_TPlot.pdf	0	0	NA	NA	NA	0	33.3045	0	3.4347e-15	7.86611e-15	yes	GO:0046914(transition metal ion binding);GO:0030054(cell junction);GO:0005623(cell);GO:0016491(oxidoreductase activity);GO:0071944(cell periphery);GO:0043169(cation binding);GO:0009505(plant-type cell wall);GO:0003824(catalytic activity);GO:0030312(external encapsulating structure);GO:0005488(binding);GO:0055114(oxidation-reduction process);GO:0008152(metabolic process);GO:0016722(oxidoreductase …	NA
PC-3p-121413_60	XM_021131237.1	966	984	976	-32.3	-21.7	0.671827	7	1-7,984-978;9-16,977-970	8-8,x-x[BULq];17-20,969-966[UP3]	....((((((((-(((((((&))))))).))))))))....	UCCACUUCUCCG-GUGAGAA&UUUUCACACGGAGAAGACUA	0	0	NA	NA	NA	0	0	NA	NA	NA	1	26.8255	4	0.999755	Output/S24h/cleaveLand_result/t_plot/PC-3p-121413_60_XM_021131237.1_976_TPlot.pdf	0	0	26.8255	2.2374e-12	2.55455e-12	yes	NA	ko03010(Ribosome)
PC-3p-121413_60	XM_021137201.1	540	559	550	-32.3	-22.1	0.684211	5.5	1-11,559-549;13-14,547-546;16-20,544-540	12-12,548-548[SIL];15-15,545-545[SIL]	(((((.((.(((((((((((&))))))))))).)).)))))	UGGUCAUCGCUGUGUGGAAA&UUUUCACACGGAGAAGACUA	0	0	NA	NA	NA	1	33.3045	4	0.991834	Output/S8h/cleaveLand_result/t_plot/PC-3p-121413_60_XM_021137201.1_550_TPlot.pdf	0	0	NA	NA	NA	0	33.3045	0	3.4347e-15	7.86611e-15	yes	GO:0043167(ion binding);GO:0046872(metal ion binding);GO:0043169(cation binding);GO:0005488(binding);GO:1902456(regulation of stomatal opening);GO:0050789(regulation of biological process);GO:0046914(transition metal ion binding);GO:0010119(regulation of stomatal movement);GO:0065007(biological regulation);GO:0050794(regulation of cellular process);GO:0008270(zinc ion binding)	ko04120(Ubiquitin mediated proteolysis)
PC-3p-121413_60	XM_021139045.1	1877	1897	1887	-32.3	-21.3	0.659443	6.5	3-9,1895-1889;10-15,1887-1882;17-20,1880-1877	1-2,1897-1896[UP5];x-x,1888-1888[BULt];16-16,1881-1881[SIL]	((((.((((((.(((((((..&..)))))))-)))))).))))	UGGUAUUCUCCGGUGUGAAUC&UUUUCACAC-GGAGAAGACUA	0	0	NA	NA	NA	0	0	NA	NA	NA	1	26.8255	4	0.999973	Output/S24h/cleaveLand_result/t_plot/PC-3p-121413_60_XM_021139045.1_1887_TPlot.pdf	0	0	26.8255	2.2374e-12	2.55455e-12	yes	NA	NA
PC-3p-121413_60	XM_021139422.1	1215	1234	1225	-32.3	-21	0.650155	6	1-6,1234-1229;8-14,1227-1221;16-18,1219-1217	7-7,1228-1228[SIL];15-15,1220-1220[SIL];19-20,1216-1215[UP3]	..(((.(((((((.((((((&)))))).))))))).)))..	UUGUCAUCUCCGUUUGAAGA&UUUUCACACGGAGAAGACUA	0	0	NA	NA	NA	0	0	NA	NA	NA	1	26.8255	4	0.999996	Output/S24h/cleaveLand_result/t_plot/PC-3p-121413_60_XM_021139422.1_1225_TPlot.pdf	0	0	26.8255	2.2374e-12	2.55455e-12	yes	GO:0046983(protein dimerization activity);GO:0005488(binding);GO:0005515(protein binding)	NA
PC-3p-121413_60	XM_021140264.1	873	896	887	-32.3	-21	0.650155	11.5	1-8,896-889;10-11,887-886;12-20,881-873	9-9,888-888[SIL];x-x,885-882[BULt]	(((((((((....((.((((((((&)))))))).))----)))))))))	UGGUCUUCUUGCACCUUGUGAAGA&UUUUCACACGG----AGAAGACUA	0	0	NA	NA	NA	1	33.3045	4	0.999981	Output/S8h/cleaveLand_result/t_plot/PC-3p-121413_60_XM_021140264.1_887_TPlot.pdf	0	0	NA	NA	NA	0	33.3045	0	3.4347e-15	7.86611e-15	yes	NA	ko01110(Biosynthesis of secondary metabolites);ko00860(Porphyrin and chlorophyll metabolism);ko00190(Oxidative phosphorylation);ko01100(Metabolic pathways)
PC-3p-121413_60	XM_021143411.1	1910	1929	1920	-32.3	-21.8	0.674923	8.5	4-14,1926-1916;16-19,1914-1911	1-3,1929-1927[UP5];15-15,1915-1915[SIL];20-20,1910-1910[UP3]	.((((.(((((((((((...&...))))))))))).)))).	GAGUUGUCUCUGUGUGACCU&UUUUCACACGGAGAAGACUA	1	30.281	4	0.997612	Output/S0h/cleaveLand_result/t_plot/PC-3p-121413_60_XM_021143411.1_1920_TPlot.pdf	0	0	NA	NA	NA	0	0	NA	NA	NA	30.281	0	0	7.0631e-14	1.09903e-13	yes	NA	NA
PC-3p-122043_60	BGI_novel_T006488	2089	2113	2103	-37.3	-27.4	0.734584	7.5	2-9,2112-2105;10-14,2103-2099;16-24,2097-2089	1-1,2113-2113[UP5];x-x,2104-2104[BULt];15-15,2098-2098[SIL]	(((((((((.(((((.((((((((.&.))))))))-))))).)))))))))	GUGUGUGUAGGUUUCAAGUUCCUGC&AUAGGAACU-GGAACGUACAUAUAU	0	0	NA	NA	NA	2	66.6089	2	0.0632803	Output/S8h/cleaveLand_result/t_plot/PC-3p-122043_60_BGI_novel_T006488_2103_TPlot.pdf	0	0	NA	NA	NA	0	66.6089	0	1.1789e-29	9.89421e-29	yes	NA	NA
PC-3p-122043_60	XM_016117321.2	351	374	365	-37.3	-24.3	0.651475	11	5-15,370-360;17-23,358-352	1-4,374-371[UP5];16-16,359-359[SIL];24-24,351-351[UP3]	.(((((((.(((((((((((....&....))))))))))).))))))).	UUAUGUGUUUGUUCCGGUUCAAGA&AUAGGAACUGGAACGUACAUAUAU	2	60.562	2	0.369233	Output/S0h/cleaveLand_result/t_plot/PC-3p-122043_60_XM_016117321.2_365_TPlot.pdf	0	0	NA	NA	NA	0	0	NA	NA	NA	60.562	0	0	4.9856e-27	3.03728e-26	yes	GO:0003824(catalytic activity)	ko00052(Galactose metabolism)
PC-3p-122043_60	XM_021126385.1	182	205	196	-37.3	-26.3	0.705094	8	2-15,204-191;18-20,188-186	1-1,205-205[UP5];16-17,190-189[SIL];21-24,185-182[UP3]	....(((..((((((((((((((.&.))))))))))))))..)))....	UGUGGUGGUUGUUCCAGUUCCUAC&AUAGGAACUGGAACGUACAUAUAU	1	30.281	4	0.511065	Output/S0h/cleaveLand_result/t_plot/PC-3p-122043_60_XM_021126385.1_196_TPlot.pdf	0	0	NA	NA	NA	0	0	NA	NA	NA	30.281	0	0	7.0631e-14	1.09903e-13	yes	NA	NA
PC-3p-122043_60	XM_021127206.1	1841	1870	1856	-37.3	-25.5	0.683646	14.5	2-8,1869-1863;9-14,1857-1852;15-22,1850-1843	1-1,1870-1870[UP5];x-x,1862-1858[BULt];x-x,1851-1851[BULt];23-24,1842-1841[UP3]	..((((((((.((((((.....(((((((.&.)))))))-----))))))-))))))))..	GAGUAUGUACAGUUCCAAACAUGUUCCUAG&AUAGGAAC-----UGGAAC-GUACAUAUAU	0	0	NA	NA	NA	1	33.3045	4	0.590771	Output/S8h/cleaveLand_result/t_plot/PC-3p-122043_60_XM_021127206.1_1856_TPlot.pdf	0	0	NA	NA	NA	0	33.3045	0	3.4347e-15	7.86611e-15	yes	GO:0044464(cell part);GO:0043226(organelle);GO:0043227(membrane-bounded organelle);GO:0044424(intracellular part);GO:0005623(cell);GO:0003676(nucleic acid binding);GO:0005634(nucleus);GO:0005622(intracellular);GO:0043229(intracellular organelle);GO:1901363(heterocyclic compound binding);GO:0043231(intracellular membrane-bounded organelle);GO:0003677(DNA binding);GO:0097159(organic cyclic compound…	NA
PC-3p-122748_59	BGI_novel_T007568	816	840	831	-43.4	-28.7	0.66129	8.5	2-11,839-830;12-16,828-824;19-23,821-817	1-1,840-840[UP5];x-x,829-829[BULt];17-18,823-822[SIL];24-24,816-816[UP3]	.(((((..(((((.((((((((((.&.))))))))))-)))))..))))).	UGGGAUGAAGGUGAUAGUGGACUUG&AAAGUCCACUG-CACCUGAGUUUCU	0	0	NA	NA	NA	0	0	NA	NA	NA	1	26.8255	4	0.990906	Output/S24h/cleaveLand_result/t_plot/PC-3p-122748_59_BGI_novel_T007568_831_TPlot.pdf	0	0	26.8255	2.2374e-12	2.55455e-12	yes	GO:0044877(macromolecular complex binding);GO:0004338(glucan exo-1,3-beta-glucosidase activity);GO:0007010(cytoskeleton organization);GO:0030029(actin filament-based process);GO:0005488(binding);GO:0006996(organelle organization);GO:0030036(actin cytoskeleton organization);GO:0032403(protein complex binding);GO:0008152(metabolic process);GO:0016798(hydrolase activity, acting on glycosyl bonds);GO…	ko04626(Plant-pathogen interaction);ko00500(Starch and sucrose metabolism);ko04016(MAPK signaling pathway - plant)
PC-3p-122748_59	XM_016076238.2	1533	1558	1549	-43.4	-28.5	0.656682	8	3-12,1556-1547;15-18,1544-1541;19-22,1539-1536;23-24,1534-1533	1-2,1558-1557[UP5];13-14,1546-1545[SIL];x-x,1540-1540[BULt];x-x,1535-1535[BULt]	((.((((.((((..((((((((((..&..))))))))))..))))-))))-))	AGAAAACAUCAGAGGCAGUGGGCUAU&AAAGUCCACUGCACCUGA-GUUU-CU	0	0	NA	NA	NA	0	0	NA	NA	NA	1	26.8255	4	0.994514	Output/S24h/cleaveLand_result/t_plot/PC-3p-122748_59_XM_016076238.2_1549_TPlot.pdf	0	0	26.8255	2.2374e-12	2.55455e-12	yes	GO:1901360(organic cyclic compound metabolic process);GO:0006520(cellular amino acid metabolic process);GO:0044238(primary metabolic process);GO:0046483(heterocycle metabolic process);GO:0043170(macromolecule metabolic process);GO:0034641(cellular nitrogen compound metabolic process);GO:0043043(peptide biosynthetic process);GO:0032559(adenyl ribonucleotide binding);GO:0035639(purine ribonucleosid…	ko00970(Aminoacyl-tRNA biosynthesis)
PC-3p-122748_59	XM_016084744.2	2141	2164	2155	-43.4	-28.8	0.663594	8.5	4-13,2161-2152;15-17,2149-2147;19-24,2146-2141	1-3,2164-2162[UP5];14-14,2151-2150[AILt];18-18,x-x[BULq]	((((((-(((..((((((((((...&...))))))))))-.))).))))))	AGAGAC-CAGCAUGCAGUGGACAUC&AAAGUCCACUGCA-CCUGAGUUUCU	0	0	NA	NA	NA	1	33.3045	4	0.973688	Output/S8h/cleaveLand_result/t_plot/PC-3p-122748_59_XM_016084744.2_2155_TPlot.pdf	0	0	NA	NA	NA	0	33.3045	0	3.4347e-15	7.86611e-15	yes	GO:0043167(ion binding);GO:0046914(transition metal ion binding);GO:0005488(binding);GO:0043169(cation binding);GO:0046872(metal ion binding);GO:0008270(zinc ion binding)	NA
PC-3p-122748_59	XM_016084748.2	2350	2373	2364	-43.4	-28.8	0.663594	8.5	4-13,2370-2361;15-17,2358-2356;19-24,2355-2350	1-3,2373-2371[UP5];14-14,2360-2359[AILt];18-18,x-x[BULq]	((((((-(((..((((((((((...&...))))))))))-.))).))))))	AGAGAC-CAGCAUGCAGUGGACAUC&AAAGUCCACUGCA-CCUGAGUUUCU	1	30.281	4	0.980462	Output/S0h/cleaveLand_result/t_plot/PC-3p-122748_59_XM_016084748.2_2364_TPlot.pdf	0	0	NA	NA	NA	0	0	NA	NA	NA	30.281	0	0	7.0631e-14	1.09903e-13	yes	GO:0043169(cation binding);GO:0005488(binding);GO:0046914(transition metal ion binding);GO:0046872(metal ion binding);GO:0008270(zinc ion binding);GO:0043167(ion binding)	NA
PC-3p-122748_59	XM_016084749.2	2359	2382	2373	-43.4	-28.8	0.663594	8.5	4-13,2379-2370;15-17,2367-2365;19-24,2364-2359	1-3,2382-2380[UP5];14-14,2369-2368[AILt];18-18,x-x[BULq]	((((((-(((..((((((((((...&...))))))))))-.))).))))))	AGAGAC-CAGCAUGCAGUGGACAUC&AAAGUCCACUGCA-CCUGAGUUUCU	1	30.281	4	0.981316	Output/S0h/cleaveLand_result/t_plot/PC-3p-122748_59_XM_016084749.2_2373_TPlot.pdf	0	0	NA	NA	NA	0	0	NA	NA	NA	30.281	0	0	7.0631e-14	1.09903e-13	yes	GO:0043169(cation binding);GO:0005488(binding);GO:0046914(transition metal ion binding);GO:0046872(metal ion binding);GO:0008270(zinc ion binding);GO:0043167(ion binding)	NA
PC-3p-122748_59	XM_016085420.2	287	311	302	-43.4	-28.42	0.654839	10	3-11,309-301;15-24,296-287	1-2,311-310[UP5];12-14,300-297[AILt]	((((((((((....(((((((((..&..)))))))))-...))))))))))	GGGAACUCAGUACUCAGUGGACUCU&AAAGUCCACUG-CACCUGAGUUUCU	0	0	NA	NA	NA	3	99.9134	2	0.780864	Output/S8h/cleaveLand_result/t_plot/PC-3p-122748_59_XM_016085420.2_302_TPlot.pdf	1	26.8255	4	0.994915	Output/S24h/cleaveLand_result/t_plot/PC-3p-122748_59_XM_016085420.2_302_TPlot.pdf	0	99.9134	26.8255	3.2338e-28	2.59555e-27	yes	GO:0016791(phosphatase activity);GO:0006793(phosphorus metabolic process);GO:0042578(phosphoric ester hydrolase activity);GO:0009987(cellular process);GO:0006796(phosphate-containing compound metabolic process);GO:0016311(dephosphorylation);GO:0003993(acid phosphatase activity);GO:0016787(hydrolase activity);GO:0008152(metabolic process);GO:0016788(hydrolase activity, acting on ester bonds);GO:00…	ko03010(Ribosome);ko04016(MAPK signaling pathway - plant)
PC-3p-122748_59	XM_016085708.2	1565	1591	1580	-43.4	-29	0.668203	11.5	3-3,1589-1589;5-8,1587-1584;9-13,1581-1577;14-23,1575-1566	1-2,1591-1590[UP5];4-4,1588-1588[SIL];x-x,1583-1582[BULt];x-x,1576-1576[BULt];24-24,1565-1565[UP3]	.((((((((((.(((((..((((.(..&..).))))--)))))-)))))))))).	UGAAGCUCAGGAUGCAGCAUGGAGUCC&AAAGUCCA--CUGCA-CCUGAGUUUCU	1	30.281	4	0.975566	Output/S0h/cleaveLand_result/t_plot/PC-3p-122748_59_XM_016085708.2_1580_TPlot.pdf	0	0	NA	NA	NA	1	26.8255	4	0.984926	Output/S24h/cleaveLand_result/t_plot/PC-3p-122748_59_XM_016085708.2_1580_TPlot.pdf	30.281	0	26.8255	5.3891e-07	5.57092e-07	yes	GO:0044260(cellular macromolecule metabolic process);GO:0006468(protein phosphorylation);GO:0051716(cellular response to stimulus);GO:0006796(phosphate-containing compound metabolic process);GO:0006464(cellular protein modification process);GO:0016310(phosphorylation);GO:0007154(cell communication);GO:0035639(purine ribonucleoside triphosphate binding);GO:0016772(transferase activity, transferrin…	NA
PC-3p-122748_59	XM_016090370.2	476	498	489	-43.4	-31.32	0.721659	5.5	2-15,497-484;20-24,480-476	1-1,498-498[UP5];16-19,483-481[AILq]	(((((...-((((((((((((((.&.))))))))))))))....)))))	AGAGAAAU-GGUGCAGUGGACUUA&AAAGUCCACUGCACCUGAGUUUCU	1	30.281	4	0.642481	Output/S0h/cleaveLand_result/t_plot/PC-3p-122748_59_XM_016090370.2_489_TPlot.pdf	3	99.9134	2	0.284032	Output/S8h/cleaveLand_result/t_plot/PC-3p-122748_59_XM_016090370.2_489_TPlot.pdf	0	0	NA	NA	NA	30.281	99.9134	0	5.4045e-27	3.2466e-26	yes	GO:1905368(peptidase complex);GO:0005623(cell);GO:0000502(proteasome complex);GO:0005622(intracellular);GO:0044464(cell part);GO:0043234(protein complex);GO:1902494(catalytic complex);GO:1905369(endopeptidase complex);GO:0044424(intracellular part);GO:0032991(macromolecular complex)	ko03050(Proteasome)
PC-3p-122748_59	XM_016102051.2	1421	1446	1436	-43.4	-29.02	0.668664	11.5	1-7,1446-1440;11-16,1435-1430;17-24,1428-1421	8-10,1439-1436[AILt];x-x,1429-1429[BULt]	((((((((.((((((....(((((((&)))))))-...))))))-))))))))	GGGAGCUCGAGGUGCUUCAGGGCUUU&AAAGUCC-ACUGCACCU-GAGUUUCU	0	0	NA	NA	NA	0	0	NA	NA	NA	2	53.6509	3	0.312086	Output/S24h/cleaveLand_result/t_plot/PC-3p-122748_59_XM_016102051.2_1436_TPlot.pdf	0	0	53.6509	5.0035e-24	2.27989e-23	yes	NA	NA
PC-3p-122748_59	XM_016103066.2	1237	1270	1261	-43.4	-30.4	0.700461	19	2-10,1269-1261;11-15,1253-1249;16-24,1245-1237	1-1,1270-1270[UP5];x-x,1260-1254[BULt];x-x,1248-1246[BULt]	(((((((((...(((((.......(((((((((.&.)))))))))-------)))))---)))))))))	GGGAACUCAAAUGGUGCUGUAAAUAGUGGACUUG&AAAGUCCACU-------GCACC---UGAGUUUCU	0	0	NA	NA	NA	1	33.3045	4	0.867473	Output/S8h/cleaveLand_result/t_plot/PC-3p-122748_59_XM_016103066.2_1261_TPlot.pdf	0	0	NA	NA	NA	0	33.3045	0	3.4347e-15	7.86611e-15	yes	GO:1901564(organonitrogen compound metabolic process);GO:0044260(cellular macromolecule metabolic process);GO:0043170(macromolecule metabolic process);GO:0044238(primary metabolic process);GO:0003824(catalytic activity);GO:0071840(cellular component organization or biogenesis);GO:0019538(protein metabolic process);GO:0006355(regulation of transcription, DNA-templated);GO:0043231(intracellular mem…	NA
PC-3p-122748_59	XM_016109888.2	1863	1885	1876	-43.4	-28.3	0.652074	11.5	4-12,1882-1874;14-16,1873-1871;18-23,1869-1864	1-3,1885-1883[UP5];13-13,x-x[BULq];17-17,1870-1870[SIL];24-24,1863-1863[UP3]	.((((((.(((-(((((((((...&...))))))))).))).)))))).	CGGGGCUGAGG-GCGGUGGAUGCA&AAAGUCCACUGCACCUGAGUUUCU	0	0	NA	NA	NA	0	0	NA	NA	NA	2	53.6509	2	0.870733	Output/S24h/cleaveLand_result/t_plot/PC-3p-122748_59_XM_016109888.2_1876_TPlot.pdf	0	0	53.6509	5.0035e-24	2.27989e-23	yes	GO:0008152(metabolic process);GO:0035639(purine ribonucleoside triphosphate binding);GO:0036211(protein modification process);GO:0036094(small molecule binding);GO:1901564(organonitrogen compound metabolic process);GO:0016773(phosphotransferase activity, alcohol group as acceptor);GO:0032553(ribonucleotide binding);GO:0006464(cellular protein modification process);GO:1901265(nucleoside phosphate …	NA
PC-3p-122748_59	XM_016112989.2	811	834	825	-43.4	-30.6	0.705069	11	4-7,831-828;9-15,826-820;17-24,818-811	1-3,834-832[UP5];8-8,827-827[SIL];16-16,819-819[SIL]	((((((((.(((((((.((((...&...)))).))))))).))))))))	AGAGGCUCCGGUGCGGAGGGCAGG&AAAGUCCACUGCACCUGAGUUUCU	2	60.562	2	0.491285	Output/S0h/cleaveLand_result/t_plot/PC-3p-122748_59_XM_016112989.2_825_TPlot.pdf	0	0	NA	NA	NA	0	0	NA	NA	NA	60.562	0	0	4.9856e-27	3.03728e-26	yes	GO:0016020(membrane)	NA
PC-3p-122748_59	XM_021129802.1	1153	1176	1167	-43.4	-30.7	0.707373	4	1-13,1176-1164;15-17,1161-1159;19-24,1158-1153	14-14,1163-1162[AILt];18-18,x-x[BULq]	((((((-(((..(((((((((((((&)))))))))))))-.))).))))))	AGGAGC-CAGAAUGCAGUGGACUUU&AAAGUCCACUGCA-CCUGAGUUUCU	0	0	NA	NA	NA	0	0	NA	NA	NA	1	26.8255	4	0.837881	Output/S24h/cleaveLand_result/t_plot/PC-3p-122748_59_XM_021129802.1_1167_TPlot.pdf	0	0	26.8255	2.2374e-12	2.55455e-12	yes	GO:0006807(nitrogen compound metabolic process);GO:0003824(catalytic activity);GO:0005488(binding);GO:0043167(ion binding);GO:0006796(phosphate-containing compound metabolic process);GO:0009987(cellular process);GO:0036211(protein modification process);GO:1901564(organonitrogen compound metabolic process);GO:0042578(phosphoric ester hydrolase activity);GO:0006470(protein dephosphorylation);GO:004…	NA
PC-3p-122748_59	XM_021131017.1	1561	1587	1576	-43.4	-29	0.668203	11.5	3-3,1585-1585;5-8,1583-1580;9-13,1577-1573;14-23,1571-1562	1-2,1587-1586[UP5];4-4,1584-1584[SIL];x-x,1579-1578[BULt];x-x,1572-1572[BULt];24-24,1561-1561[UP3]	.((((((((((.(((((..((((.(..&..).))))--)))))-)))))))))).	UGAAGCUCAGGAUGCAGCAUGGAGUCC&AAAGUCCA--CUGCA-CCUGAGUUUCU	1	30.281	4	0.97078	Output/S0h/cleaveLand_result/t_plot/PC-3p-122748_59_XM_021131017.1_1576_TPlot.pdf	0	0	NA	NA	NA	0	0	NA	NA	NA	30.281	0	0	7.0631e-14	1.09903e-13	yes	GO:0044260(cellular macromolecule metabolic process);GO:0006468(protein phosphorylation);GO:0051716(cellular response to stimulus);GO:0006796(phosphate-containing compound metabolic process);GO:0006464(cellular protein modification process);GO:0016310(phosphorylation);GO:0007154(cell communication);GO:0035639(purine ribonucleoside triphosphate binding);GO:0016772(transferase activity, transferrin…	NA
PC-3p-122855_59	BGI_novel_T007684	1696	1719	1710	-35.8	-23.5	0.656425	16.5	8-22,1712-1698	1-7,1719-1713[UP5];23-24,1697-1696[UP3]	..(((((((((((((((.......&.......)))))))))))))))..	ACCAGGUUGUAUGGUCCUUGAGGC&AUAAAACGGACCAUACGAUUUGUA	0	0	NA	NA	NA	1	33.3045	4	0.72096	Output/S8h/cleaveLand_result/t_plot/PC-3p-122855_59_BGI_novel_T007684_1710_TPlot.pdf	0	0	NA	NA	NA	0	33.3045	0	3.4347e-15	7.86611e-15	yes	GO:0044237(cellular metabolic process);GO:0005623(cell);GO:0019219(regulation of nucleobase-containing compound metabolic process);GO:0043226(organelle);GO:0009719(response to endogenous stimulus);GO:0010556(regulation of macromolecule biosynthetic process);GO:0005634(nucleus);GO:0090304(nucleic acid metabolic process);GO:0043231(intracellular membrane-bounded organelle);GO:0050896(response to st…	ko04075(Plant hormone signal transduction)
PC-3p-122855_59	XM_016112870.2	1751	1774	1765	-35.8	-23.5	0.656425	16.5	8-22,1767-1753	1-7,1774-1768[UP5];23-24,1752-1751[UP3]	..(((((((((((((((.......&.......)))))))))))))))..	ACCAGGUUGUAUGGUCCUUGAGGC&AUAAAACGGACCAUACGAUUUGUA	0	0	NA	NA	NA	2	66.6089	1	0.0269702	Output/S8h/cleaveLand_result/t_plot/PC-3p-122855_59_XM_016112870.2_1765_TPlot.pdf	0	0	NA	NA	NA	0	66.6089	0	1.1789e-29	9.89421e-29	yes	GO:0044237(cellular metabolic process);GO:0005623(cell);GO:0019219(regulation of nucleobase-containing compound metabolic process);GO:0043226(organelle);GO:0009719(response to endogenous stimulus);GO:0010556(regulation of macromolecule biosynthetic process);GO:0005634(nucleus);GO:0090304(nucleic acid metabolic process);GO:0043231(intracellular membrane-bounded organelle);GO:0050896(response to st…	ko04075(Plant hormone signal transduction)
PC-3p-122855_59	XM_021126165.1	1764	1787	1778	-35.8	-23.5	0.656425	16.5	8-22,1780-1766	1-7,1787-1781[UP5];23-24,1765-1764[UP3]	..(((((((((((((((.......&.......)))))))))))))))..	ACCAGGUUGUAUGGUCCUUGAGGC&AUAAAACGGACCAUACGAUUUGUA	0	0	NA	NA	NA	1	33.3045	4	0.726834	Output/S8h/cleaveLand_result/t_plot/PC-3p-122855_59_XM_021126165.1_1778_TPlot.pdf	0	0	NA	NA	NA	0	33.3045	0	3.4347e-15	7.86611e-15	yes	GO:0044237(cellular metabolic process);GO:0005623(cell);GO:0019219(regulation of nucleobase-containing compound metabolic process);GO:0043226(organelle);GO:0009719(response to endogenous stimulus);GO:0010556(regulation of macromolecule biosynthetic process);GO:0005634(nucleus);GO:0090304(nucleic acid metabolic process);GO:0043231(intracellular membrane-bounded organelle);GO:0050896(response to st…	ko04075(Plant hormone signal transduction)
PC-3p-122855_59	XM_021139917.1	666	689	680	-35.8	-25.1	0.701117	5.5	1-21,689-669	22-24,668-666[UP3]	...(((((((((((((((((((((&)))))))))))))))))))))...	AGAAAAUUGUAUGGUUUGUUUUAU&AUAAAACGGACCAUACGAUUUGUA	0	0	NA	NA	NA	1	33.3045	4	0.332485	Output/S8h/cleaveLand_result/t_plot/PC-3p-122855_59_XM_021139917.1_680_TPlot.pdf	0	0	NA	NA	NA	0	33.3045	0	3.4347e-15	7.86611e-15	yes	NA	NA
PC-3p-12333_982	BGI_novel_T000740	3529	3553	3543	-42.7	-28.3	0.662763	9.5	3-4,3551-3550;5-12,3548-3541;14-16,3539-3537;18-24,3535-3529	1-2,3553-3552[UP5];x-x,3549-3549[BULt];13-13,3540-3540[SIL];17-17,3536-3536[SIL]	(((((((.(((.((((((((.((..&..))-)))))))).))).)))))))	UCAGCAAGUGAGGAAGCCCAUGCUA&UUGU-UGGGCUUUAUCAGUUGCUGG	0	0	NA	NA	NA	1	33.3045	4	0.99994	Output/S8h/cleaveLand_result/t_plot/PC-3p-12333_982_BGI_novel_T000740_3543_TPlot.pdf	0	0	NA	NA	NA	0	33.3045	0	3.4347e-15	7.86611e-15	yes	NA	ko04933(AGE-RAGE signaling pathway in diabetic complications)
PC-3p-12333_982	BGI_novel_T001906	1420	1444	1435	-42.7	-31.9	0.747073	7	1-9,1444-1436;12-16,1433-1429;18-24,1426-1420	10-11,1435-1434[SIL];17-17,1428-1427[AILt]	(((((((..(((((..(((((((((&)))))))))..)))))-.)))))))	CCAGCAGGAUGGUAUUGCCCAACAA&UUGUUGGGCUUUAUCA-GUUGCUGG	0	0	NA	NA	NA	0	0	NA	NA	NA	2	53.6509	1	0.0114016	Output/S24h/cleaveLand_result/t_plot/PC-3p-12333_982_BGI_novel_T001906_1435_TPlot.pdf	0	0	53.6509	5.0035e-24	2.27989e-23	yes	GO:0016887(ATPase activity);GO:0030554(adenyl nucleotide binding);GO:0005886(plasma membrane);GO:0016020(membrane);GO:0071944(cell periphery);GO:0016462(pyrophosphatase activity);GO:0044425(membrane part);GO:0016817(hydrolase activity, acting on acid anhydrides);GO:0043492(ATPase activity, coupled to movement of substances);GO:0005215(transporter activity);GO:0097159(organic cyclic compound bindi…	ko02010(ABC transporters)
PC-3p-12333_982	BGI_novel_T008368	494	517	508	-42.7	-28.3	0.662763	9	1-11,517-507;13-22,505-496	12-12,506-506[SIL];23-24,495-494[UP3]	..((((((((((.(((((((((((&))))))))))).))))))))))..	GAGGCAGCUGAUUGAGCUCAAUGA&UUGUUGGGCUUUAUCAGUUGCUGG	2	60.562	2	0.968205	Output/S0h/cleaveLand_result/t_plot/PC-3p-12333_982_BGI_novel_T008368_508_TPlot.pdf	0	0	NA	NA	NA	0	0	NA	NA	NA	60.562	0	0	4.9856e-27	3.03728e-26	yes	GO:0034504(protein localization to nucleus);GO:0005215(transporter activity);GO:0033046(negative regulation of sister chromatid segregation);GO:0051170(nuclear import);GO:0051169(nuclear transport);GO:0071705(nitrogen compound transport);GO:0006886(intracellular protein transport);GO:0006810(transport);GO:0045786(negative regulation of cell cycle);GO:0007049(cell cycle);GO:0007094(mitotic spindle…	ko03013(RNA transport)
PC-3p-12333_982	BGI_novel_T009373	1027	1052	1043	-42.7	-27.8	0.651054	7	1-5,1052-1048;7-15,1046-1038;17-24,1034-1027	6-6,1047-1047[SIL];16-16,1037-1035[AILt]	((((((((...(((((((((.(((((&))))).)))))))))--.))))))))	CUAGCAACAAAGAUAAAGCUGAACAG&UUGUUGGGCUUUAUC--AGUUGCUGG	0	0	NA	NA	NA	1	33.3045	4	0.999993	Output/S8h/cleaveLand_result/t_plot/PC-3p-12333_982_BGI_novel_T009373_1043_TPlot.pdf	2	53.6509	2	0.992484	Output/S24h/cleaveLand_result/t_plot/PC-3p-12333_982_BGI_novel_T009373_1043_TPlot.pdf	0	33.3045	53.6509	1.0184e-11	1.14021e-11	yes	NA	ko00071(Fatty acid degradation);ko01100(Metabolic pathways);ko04146(Peroxisome);ko01212(Fatty acid metabolism);ko00061(Fatty acid biosynthesis)
PC-3p-12333_982	BGI_novel_T010672	3606	3628	3619	-42.7	-29.9	0.700234	7.5	1-11,3628-3618;13-24,3617-3606	12-12,x-x[BULq]	((((((((((((-(((((((((((&))))))))))).))))))))))))	CCGGCAACUGGU-AGGCCUAGUAG&UUGUUGGGCUUUAUCAGUUGCUGG	1	30.281	4	0.972676	Output/S0h/cleaveLand_result/t_plot/PC-3p-12333_982_BGI_novel_T010672_3619_TPlot.pdf	0	0	NA	NA	NA	2	53.6509	2	0.756752	Output/S24h/cleaveLand_result/t_plot/PC-3p-12333_982_BGI_novel_T010672_3619_TPlot.pdf	30.281	0	53.6509	5.8531e-12	6.61749e-12	yes	GO:0005623(cell);GO:0060255(regulation of macromolecule metabolic process);GO:0019219(regulation of nucleobase-containing compound metabolic process);GO:0044260(cellular macromolecule metabolic process);GO:0050789(regulation of biological process);GO:0019538(protein metabolic process);GO:0005737(cytoplasm);GO:2000112(regulation of cellular macromolecule biosynthetic process);GO:0044444(cytoplasmi…	ko00480(Glutathione metabolism);ko04016(MAPK signaling pathway - plant);ko04075(Plant hormone signal transduction)
PC-3p-12333_982	BGI_novel_T011295	1022	1045	1036	-42.7	-28.8	0.674473	11	1-4,1045-1042;6-6,1040-1040;8-9,1038-1037;12-24,1034-1022	5-5,1041-1041[SIL];7-7,1039-1039[SIL];10-11,1036-1035[SIL]	(((((((((((((..((.(.((((&)))).).))..)))))))))))))	CCGGCGACUGGUACUGCGCCGCAG&UUGUUGGGCUUUAUCAGUUGCUGG	0	0	NA	NA	NA	1	33.3045	4	0.999322	Output/S8h/cleaveLand_result/t_plot/PC-3p-12333_982_BGI_novel_T011295_1036_TPlot.pdf	0	0	NA	NA	NA	0	33.3045	0	3.4347e-15	7.86611e-15	yes	GO:0046914(transition metal ion binding);GO:0008270(zinc ion binding);GO:0043169(cation binding);GO:0043167(ion binding);GO:0005488(binding);GO:0046872(metal ion binding)	ko03022(Basal transcription factors)
PC-3p-12333_982	XM_016077957.2	2854	2878	2868	-42.7	-28.76	0.673536	8	1-7,2878-2872;8-12,2870-2866;17-24,2861-2854	x-x,2871-2871[BULt];13-16,2865-2862[SIL]	((((((((....(((((.(((((((&)))))))-)))))....))))))))	CCAGCAACACCAGAAGCACCAGCAA&UUGUUGG-GCUUUAUCAGUUGCUGG	0	0	NA	NA	NA	1	33.3045	4	0.999364	Output/S8h/cleaveLand_result/t_plot/PC-3p-12333_982_XM_016077957.2_2868_TPlot.pdf	0	0	NA	NA	NA	0	33.3045	0	3.4347e-15	7.86611e-15	yes	GO:0032555(purine ribonucleotide binding);GO:1901265(nucleoside phosphate binding);GO:0043168(anion binding);GO:0005524(ATP binding);GO:0008152(metabolic process);GO:0030554(adenyl nucleotide binding);GO:0035639(purine ribonucleoside triphosphate binding);GO:0016628(oxidoreductase activity, acting on the CH-CH group of donors, NAD or NADP as acceptor);GO:0055114(oxidation-reduction process);GO:00…	NA
PC-3p-12333_982	XM_016080573.2	3615	3637	3628	-42.7	-29.9	0.700234	7.5	1-11,3637-3627;13-24,3626-3615	12-12,x-x[BULq]	((((((((((((-(((((((((((&))))))))))).))))))))))))	CCGGCAACUGGU-AGGCCUAGUAG&UUGUUGGGCUUUAUCAGUUGCUGG	1	30.281	4	0.97078	Output/S0h/cleaveLand_result/t_plot/PC-3p-12333_982_XM_016080573.2_3628_TPlot.pdf	0	0	NA	NA	NA	0	0	NA	NA	NA	30.281	0	0	7.0631e-14	1.09903e-13	yes	GO:0005623(cell);GO:0060255(regulation of macromolecule metabolic process);GO:0019219(regulation of nucleobase-containing compound metabolic process);GO:0044260(cellular macromolecule metabolic process);GO:0050789(regulation of biological process);GO:0019538(protein metabolic process);GO:0005737(cytoplasm);GO:2000112(regulation of cellular macromolecule biosynthetic process);GO:0044444(cytoplasmi…	ko00480(Glutathione metabolism);ko04016(MAPK signaling pathway - plant);ko04075(Plant hormone signal transduction)
PC-3p-12333_982	XM_016082583.2	583	606	597	-42.7	-28.8	0.674473	11	1-4,606-603;6-6,601-601;8-9,599-598;12-24,595-583	5-5,602-602[SIL];7-7,600-600[SIL];10-11,597-596[SIL]	(((((((((((((..((.(.((((&)))).).))..)))))))))))))	CCGGCGACUGGUACUGCGCCGCAG&UUGUUGGGCUUUAUCAGUUGCUGG	0	0	NA	NA	NA	0	0	NA	NA	NA	2	53.6509	2	0.946748	Output/S24h/cleaveLand_result/t_plot/PC-3p-12333_982_XM_016082583.2_597_TPlot.pdf	0	0	53.6509	5.0035e-24	2.27989e-23	yes	GO:0046914(transition metal ion binding);GO:0008270(zinc ion binding);GO:0043169(cation binding);GO:0043167(ion binding);GO:0005488(binding);GO:0046872(metal ion binding)	ko03022(Basal transcription factors)
PC-3p-12333_982	XM_016083263.2	135	162	149	-42.7	-29.1	0.681499	12.5	1-6,162-157;7-15,152-144;17-24,142-135	x-x,156-153[BULt];16-16,143-143[SIL]	((((((((.(((((((((....((((((&))))))----))))))))).))))))))	CCAGCAACAGGUAGAGUCUUUGCAGCAA&UUGUUG----GGCUUUAUCAGUUGCUGG	0	0	NA	NA	NA	1	33.3045	4	0.997519	Output/S8h/cleaveLand_result/t_plot/PC-3p-12333_982_XM_016083263.2_149_TPlot.pdf	0	0	NA	NA	NA	0	33.3045	0	3.4347e-15	7.86611e-15	yes	NA	NA
PC-3p-12333_982	XM_016083797.2	438	464	455	-42.7	-30.3	0.709602	11.5	1-11,464-454;12-19,450-443;21-24,441-438	x-x,453-451[BULt];20-20,442-442[SIL]	((((.((((((((...(((((((((((&)))))))))))---)))))))).))))	CCAGGAGCUGGUGGACAGGUCCAACAG&UUGUUGGGCUU---UAUCAGUUGCUGG	0	0	NA	NA	NA	3	99.9134	2	0.509249	Output/S8h/cleaveLand_result/t_plot/PC-3p-12333_982_XM_016083797.2_455_TPlot.pdf	1	26.8255	4	0.915958	Output/S24h/cleaveLand_result/t_plot/PC-3p-12333_982_XM_016083797.2_455_TPlot.pdf	0	99.9134	26.8255	3.2338e-28	2.59555e-27	yes	GO:0009719(response to endogenous stimulus);GO:0042221(response to chemical);GO:0009725(response to hormone);GO:0050896(response to stimulus);GO:0010033(response to organic substance);GO:0009733(response to auxin)	ko04075(Plant hormone signal transduction)
PC-3p-12333_982	XM_016086989.2	1690	1714	1705	-42.7	-28.8	0.674473	9	3-16,1712-1699;18-24,1696-1690	1-2,1714-1713[UP5];17-17,1698-1697[AILt]	(((((((..((((((((((((((..&..))))))))))))))-.)))))))	UCAGCAGGAUGAUAAGGCUCAGCCU&UUGUUGGGCUUUAUCA-GUUGCUGG	1	30.281	4	0.999454	Output/S0h/cleaveLand_result/t_plot/PC-3p-12333_982_XM_016086989.2_1705_TPlot.pdf	0	0	NA	NA	NA	0	0	NA	NA	NA	30.281	0	0	7.0631e-14	1.09903e-13	yes	GO:0032549(ribonucleoside binding);GO:1901265(nucleoside phosphate binding);GO:0017111(nucleoside-triphosphatase activity);GO:0036094(small molecule binding);GO:0044249(cellular biosynthetic process);GO:0044238(primary metabolic process);GO:1901564(organonitrogen compound metabolic process);GO:0017076(purine nucleotide binding);GO:0003924(GTPase activity);GO:1901363(heterocyclic compound binding)…	ko03013(RNA transport)
PC-3p-12333_982	XM_016086990.2	1618	1642	1633	-42.7	-28.8	0.674473	9	3-16,1640-1627;18-24,1624-1618	1-2,1642-1641[UP5];17-17,1626-1625[AILt]	(((((((..((((((((((((((..&..))))))))))))))-.)))))))	UCAGCAGGAUGAUAAGGCUCAGCCU&UUGUUGGGCUUUAUCA-GUUGCUGG	1	30.281	4	0.999554	Output/S0h/cleaveLand_result/t_plot/PC-3p-12333_982_XM_016086990.2_1633_TPlot.pdf	2	66.6089	2	0.918397	Output/S8h/cleaveLand_result/t_plot/PC-3p-12333_982_XM_016086990.2_1633_TPlot.pdf	0	0	NA	NA	NA	30.281	66.6089	0	1.1047e-15	4.24984e-15	yes	GO:0032549(ribonucleoside binding);GO:1901265(nucleoside phosphate binding);GO:0017111(nucleoside-triphosphatase activity);GO:0036094(small molecule binding);GO:0044249(cellular biosynthetic process);GO:0044238(primary metabolic process);GO:1901564(organonitrogen compound metabolic process);GO:0017076(purine nucleotide binding);GO:0003924(GTPase activity);GO:1901363(heterocyclic compound binding)…	ko03013(RNA transport)
PC-3p-12333_982	XM_016089564.2	368	391	382	-42.7	-29.2	0.683841	6.5	2-12,390-380;15-20,377-372;23-24,369-368	1-1,391-391[UP5];13-14,379-378[SIL];21-22,371-370[SIL]	((..((((((..(((((((((((.&.)))))))))))..))))))..))	CCCUCAGCUGUGAAAGCCCAGCAU&UUGUUGGGCUUUAUCAGUUGCUGG	0	0	NA	NA	NA	1	33.3045	4	0.996658	Output/S8h/cleaveLand_result/t_plot/PC-3p-12333_982_XM_016089564.2_382_TPlot.pdf	0	0	NA	NA	NA	0	33.3045	0	3.4347e-15	7.86611e-15	yes	NA	NA
PC-3p-12333_982	XM_016089734.2	285	309	300	-42.7	-28.1	0.65808	8.5	3-16,307-294;18-21,292-289;22-24,287-285	1-2,309-308[UP5];17-17,293-293[SIL];x-x,288-288[BULt]	(((.((((.((((((((((((((..&..)))))))))))))).))))-)))	CUAUGUAGGUGAUGAAGCCCAAUCC&UUGUUGGGCUUUAUCAGUUGC-UGG	2	60.562	3	0.664141	Output/S0h/cleaveLand_result/t_plot/PC-3p-12333_982_XM_016089734.2_300_TPlot.pdf	0	0	NA	NA	NA	1	26.8255	4	0.999997	Output/S24h/cleaveLand_result/t_plot/PC-3p-12333_982_XM_016089734.2_300_TPlot.pdf	60.562	0	26.8255	1.8594e-14	4.12939e-14	yes	GO:0005524(ATP binding);GO:0035639(purine ribonucleoside triphosphate binding);GO:0017076(purine nucleotide binding);GO:0032553(ribonucleotide binding);GO:0032555(purine ribonucleotide binding);GO:1901265(nucleoside phosphate binding);GO:0097367(carbohydrate derivative binding);GO:0097159(organic cyclic compound binding);GO:0005488(binding);GO:1901363(heterocyclic compound binding);GO:0043167(ion…	NA
PC-3p-12333_982	XM_016089735.2	333	357	348	-42.7	-28.1	0.65808	8.5	3-16,355-342;18-21,340-337;22-24,335-333	1-2,357-356[UP5];17-17,341-341[SIL];x-x,336-336[BULt]	(((.((((.((((((((((((((..&..)))))))))))))).))))-)))	CUAUGUAGGUGAUGAAGCCCAAUCC&UUGUUGGGCUUUAUCAGUUGC-UGG	0	0	NA	NA	NA	0	0	NA	NA	NA	1	26.8255	4	0.999997	Output/S24h/cleaveLand_result/t_plot/PC-3p-12333_982_XM_016089735.2_348_TPlot.pdf	0	0	26.8255	2.2374e-12	2.55455e-12	yes	GO:0017076(purine nucleotide binding);GO:0000166(nucleotide binding);GO:1901363(heterocyclic compound binding);GO:0032553(ribonucleotide binding);GO:0043167(ion binding);GO:0030554(adenyl nucleotide binding);GO:0043168(anion binding);GO:0005488(binding);GO:1901265(nucleoside phosphate binding);GO:0097367(carbohydrate derivative binding);GO:0032559(adenyl ribonucleotide binding);GO:0036094(small m…	NA
PC-3p-12333_982	XM_016089736.2	335	359	350	-42.7	-28.1	0.65808	8.5	3-16,357-344;18-21,342-339;22-24,337-335	1-2,359-358[UP5];17-17,343-343[SIL];x-x,338-338[BULt]	(((.((((.((((((((((((((..&..)))))))))))))).))))-)))	CUAUGUAGGUGAUGAAGCCCAAUCC&UUGUUGGGCUUUAUCAGUUGC-UGG	0	0	NA	NA	NA	0	0	NA	NA	NA	1	26.8255	4	0.999997	Output/S24h/cleaveLand_result/t_plot/PC-3p-12333_982_XM_016089736.2_350_TPlot.pdf	0	0	26.8255	2.2374e-12	2.55455e-12	yes	GO:0017076(purine nucleotide binding);GO:0000166(nucleotide binding);GO:1901363(heterocyclic compound binding);GO:0032553(ribonucleotide binding);GO:0043167(ion binding);GO:0030554(adenyl nucleotide binding);GO:0043168(anion binding);GO:0005488(binding);GO:1901265(nucleoside phosphate binding);GO:0097367(carbohydrate derivative binding);GO:0032559(adenyl ribonucleotide binding);GO:0036094(small m…	NA
PC-3p-12333_982	XM_016091379.2	3770	3797	3788	-42.7	-31.5	0.737705	7	1-12,3797-3786;14-18,3784-3780;19-23,3775-3771	13-13,3785-3785[SIL];x-x,3779-3776[BULt];24-24,3770-3770[UP3]	.(((((....(((((.((((((((((((&)))))))))))).)))))----))))).	ACAGCGUAAUGCUGAGAAAGCCCAACAA&UUGUUGGGCUUUAUCAGU----UGCUGG	0	0	NA	NA	NA	0	0	NA	NA	NA	1	26.8255	4	0.607407	Output/S24h/cleaveLand_result/t_plot/PC-3p-12333_982_XM_016091379.2_3788_TPlot.pdf	0	0	26.8255	2.2374e-12	2.55455e-12	yes	GO:0016020(membrane);GO:0031224(intrinsic component of membrane);GO:0016021(integral component of membrane);GO:0044425(membrane part)	NA
PC-3p-12333_982	XM_016094040.2	604	626	618	-42.7	-30.8	0.721311	10	2-9,625-618;13-16,615-612;18-24,610-604	1-1,626-626[UP5];10-12,617-616[AILq];17-17,611-611[SIL]	(((((((.((((..-((((((((.&.))))))))...)))).)))))))	CCAGCGAGUGGUCC-GCCCAGCAG&UUGUUGGGCUUUAUCAGUUGCUGG	0	0	NA	NA	NA	1	33.3045	4	0.662078	Output/S8h/cleaveLand_result/t_plot/PC-3p-12333_982_XM_016094040.2_618_TPlot.pdf	0	0	NA	NA	NA	0	33.3045	0	3.4347e-15	7.86611e-15	yes	GO:0016616(oxidoreductase activity, acting on the CH-OH group of donors, NAD or NADP as acceptor);GO:0055114(oxidation-reduction process);GO:0008152(metabolic process);GO:0003824(catalytic activity);GO:0016614(oxidoreductase activity, acting on CH-OH group of donors);GO:0016491(oxidoreductase activity)	ko00053(Ascorbate and aldarate metabolism);ko01100(Metabolic pathways);ko01110(Biosynthesis of secondary metabolites)
PC-3p-12333_982	XM_016096512.2	2143	2166	2157	-42.7	-28.5	0.667447	6.5	2-3,2165-2164;5-14,2162-2153;17-24,2150-2143	1-1,2166-2166[UP5];4-4,2163-2163[SIL];15-16,2152-2151[SIL]	((((((((..((((((((((.((.&.)).))))))))))..))))))))	CCGGCAACCAAUAAAGCCUAUCAC&UUGUUGGGCUUUAUCAGUUGCUGG	1	30.281	4	0.999857	Output/S0h/cleaveLand_result/t_plot/PC-3p-12333_982_XM_016096512.2_2157_TPlot.pdf	0	0	NA	NA	NA	0	0	NA	NA	NA	30.281	0	0	7.0631e-14	1.09903e-13	yes	GO:0090304(nucleic acid metabolic process);GO:0044428(nuclear part);GO:0034660(ncRNA metabolic process);GO:0043414(macromolecule methylation);GO:1990904(ribonucleoprotein complex);GO:0031974(membrane-enclosed lumen);GO:0001510(RNA methylation);GO:0043412(macromolecule modification);GO:0046483(heterocycle metabolic process);GO:0016070(RNA metabolic process);GO:0016741(transferase activity, transfe…	NA
PC-3p-12333_982	XM_016096748.2	1188	1216	1202	-42.7	-28.2	0.660422	15.5	2-7,1215-1210;8-19,1204-1193;21-24,1191-1188	1-1,1216-1216[UP5];x-x,1209-1205[BULt];20-20,1192-1192[SIL]	((((.((((((((((((.....((((((.&.))))))-----)))))))))))).))))	CCAGGAAUUGAUGAGGUUUGCUCCAACAC&UUGUUGG-----GCUUUAUCAGUUGCUGG	1	30.281	4	0.999976	Output/S0h/cleaveLand_result/t_plot/PC-3p-12333_982_XM_016096748.2_1202_TPlot.pdf	0	0	NA	NA	NA	0	0	NA	NA	NA	30.281	0	0	7.0631e-14	1.09903e-13	yes	GO:0072655(establishment of protein localization to mitochondrion);GO:0031224(intrinsic component of membrane);GO:0070727(cellular macromolecule localization);GO:0032555(purine ribonucleotide binding);GO:0006886(intracellular protein transport);GO:0043226(organelle);GO:1901265(nucleoside phosphate binding);GO:0044429(mitochondrial part);GO:0015031(protein transport);GO:0044237(cellular metabolic …	NA
PC-3p-12333_982	XM_016096751.2	1072	1100	1086	-42.7	-28.2	0.660422	15.5	2-7,1099-1094;8-19,1088-1077;21-24,1075-1072	1-1,1100-1100[UP5];x-x,1093-1089[BULt];20-20,1076-1076[SIL]	((((.((((((((((((.....((((((.&.))))))-----)))))))))))).))))	CCAGGAAUUGAUGAGGUUUGCUCCAACAC&UUGUUGG-----GCUUUAUCAGUUGCUGG	0	0	NA	NA	NA	1	33.3045	4	0.999962	Output/S8h/cleaveLand_result/t_plot/PC-3p-12333_982_XM_016096751.2_1086_TPlot.pdf	0	0	NA	NA	NA	0	33.3045	0	3.4347e-15	7.86611e-15	yes	GO:0072655(establishment of protein localization to mitochondrion);GO:0031224(intrinsic component of membrane);GO:0070727(cellular macromolecule localization);GO:0032555(purine ribonucleotide binding);GO:0006886(intracellular protein transport);GO:0043226(organelle);GO:1901265(nucleoside phosphate binding);GO:0044429(mitochondrial part);GO:0015031(protein transport);GO:0044237(cellular metabolic …	NA
PC-3p-12333_982	XM_016096813.2	308	333	324	-42.7	-28.7	0.672131	8	1-17,333-317;18-24,314-308	x-x,316-315[BULt]	(((((((..(((((((((((((((((&)))))))))))))))))--)))))))	UUAGCAAACUUGAUGAGGUCCAGCAG&UUGUUGGGCUUUAUCAG--UUGCUGG	0	0	NA	NA	NA	1	33.3045	4	0.999391	Output/S8h/cleaveLand_result/t_plot/PC-3p-12333_982_XM_016096813.2_324_TPlot.pdf	0	0	NA	NA	NA	0	33.3045	0	3.4347e-15	7.86611e-15	yes	GO:0016020(membrane);GO:0016021(integral component of membrane);GO:0044425(membrane part);GO:0031224(intrinsic component of membrane)	ko00051(Fructose and mannose metabolism);ko01230(Biosynthesis of amino acids);ko00030(Pentose phosphate pathway);ko01100(Metabolic pathways);ko01040(Biosynthesis of unsaturated fatty acids);ko01200(Carbon metabolism);ko01212(Fatty acid metabolism);ko01110(Biosynthesis of secondary metabolites);ko00052(Galactose metabolism);ko00062(Fatty acid elongation);ko03018(RNA degradation);ko00010(Glycolysis…
PC-3p-12333_982	XM_016097021.2	344	370	361	-42.7	-30.2	0.70726	10.5	2-5,369-366;7-18,364-353;19-23,349-345	1-1,370-370[UP5];6-6,365-365[SIL];x-x,352-350[BULt];24-24,344-344[UP3]	.(((((...((((((((((((.((((.&.)))).))))))))))))---))))).	ACAGCAUCAGCUGAUGAAGCUGAGCAU&UUGUUGGGCUUUAUCAGU---UGCUGG	0	0	NA	NA	NA	0	0	NA	NA	NA	1	26.8255	4	0.964407	Output/S24h/cleaveLand_result/t_plot/PC-3p-12333_982_XM_016097021.2_361_TPlot.pdf	0	0	26.8255	2.2374e-12	2.55455e-12	yes	GO:0020037(heme binding);GO:0046906(tetrapyrrole binding);GO:0009055(electron transfer activity);GO:1901363(heterocyclic compound binding);GO:0005488(binding);GO:0097159(organic cyclic compound binding)	ko01100(Metabolic pathways);ko00190(Oxidative phosphorylation)
PC-3p-12333_982	XM_016098183.2	1113	1137	1128	-42.7	-32	0.749415	7.5	2-6,1136-1132;8-13,1130-1125;14-23,1123-1114	1-1,1137-1137[UP5];7-7,1131-1131[SIL];x-x,1124-1124[BULt];24-24,1113-1113[UP3]	.((((((((((.((((((.(((((.&.))))).))))))-)))))))))).	GCAGCAGCUGAUUAAGGCGCAGCAC&UUGUUGGGCUUUA-UCAGUUGCUGG	1	30.281	4	0.402071	Output/S0h/cleaveLand_result/t_plot/PC-3p-12333_982_XM_016098183.2_1128_TPlot.pdf	1	33.3045	4	0.386937	Output/S8h/cleaveLand_result/t_plot/PC-3p-12333_982_XM_016098183.2_1128_TPlot.pdf	0	0	NA	NA	NA	30.281	33.3045	0	1.1203e-07	1.21623e-07	yes	NA	NA
PC-3p-12333_982	XM_016101716.2	568	595	585	-42.7	-31.5	0.737705	7	1-7,595-589;8-17,587-578;18-20,575-573;21-24,571-568	x-x,588-588[BULt];x-x,577-576[BULt];x-x,572-572[BULt]	((((.(((..((((((((((.(((((((&)))))))-))))))))))--)))-))))	CCAGACAAUUCUGAUGAAGCACCAGCAA&UUGUUGG-GCUUUAUCAG--UUG-CUGG	1	30.281	4	0.60019	Output/S0h/cleaveLand_result/t_plot/PC-3p-12333_982_XM_016101716.2_585_TPlot.pdf	0	0	NA	NA	NA	0	0	NA	NA	NA	30.281	0	0	7.0631e-14	1.09903e-13	yes	GO:0043229(intracellular organelle);GO:2000112(regulation of cellular macromolecule biosynthetic process);GO:0003677(DNA binding);GO:0050789(regulation of biological process);GO:0010468(regulation of gene expression);GO:0044464(cell part);GO:0051171(regulation of nitrogen compound metabolic process);GO:0006355(regulation of transcription, DNA-templated);GO:0019219(regulation of nucleobase-contain…	NA
PC-3p-12333_982	XM_016102403.2	1638	1663	1655	-42.7	-29.7	0.69555	8.5	1-8,1663-1656;10-18,1655-1647;19-23,1643-1639	9-9,x-x[BULq];x-x,1646-1644[BULt];24-24,1638-1638[UP3]	.(((((...(((((((((-((((((((&)))))))).)))))))))---))))).	GCAGCAUAUGCUGAUGAA-CCCAGCAA&UUGUUGGGCUUUAUCAGU---UGCUGG	1	30.281	4	0.982134	Output/S0h/cleaveLand_result/t_plot/PC-3p-12333_982_XM_016102403.2_1655_TPlot.pdf	0	0	NA	NA	NA	1	26.8255	4	0.989418	Output/S24h/cleaveLand_result/t_plot/PC-3p-12333_982_XM_016102403.2_1655_TPlot.pdf	30.281	0	26.8255	5.3891e-07	5.57092e-07	yes	GO:0030276(clathrin binding);GO:0030135(coated vesicle);GO:0005622(intracellular);GO:0070271(protein complex biogenesis);GO:0005737(cytoplasm);GO:0022607(cellular component assembly);GO:0006461(protein complex assembly);GO:0044464(cell part);GO:0005488(binding);GO:0043933(macromolecular complex subunit organization);GO:0044085(cellular component biogenesis);GO:0065003(macromolecular complex assem…	NA
PC-3p-12333_982	XM_016104994.2	601	623	615	-42.7	-29.5	0.690867	7.5	2-5,622-619;8-23,617-602	1-1,623-623[UP5];6-7,618-618[AILq];24-24,601-601[UP3]	.((((((((((((((((.-((((.&.))))..)))))))))))))))).	ACAGCAACUGGUAAAGCA-AGCAC&UUGUUGGGCUUUAUCAGUUGCUGG	0	0	NA	NA	NA	0	0	NA	NA	NA	1	26.8255	4	0.998195	Output/S24h/cleaveLand_result/t_plot/PC-3p-12333_982_XM_016104994.2_615_TPlot.pdf	0	0	26.8255	2.2374e-12	2.55455e-12	yes	GO:0005488(binding);GO:1901363(heterocyclic compound binding);GO:0003676(nucleic acid binding);GO:0097159(organic cyclic compound binding)	ko03013(RNA transport);ko03008(Ribosome biogenesis in eukaryotes)
PC-3p-12333_982	XM_016104995.2	603	625	617	-42.7	-29.5	0.690867	7.5	2-5,624-621;8-23,619-604	1-1,625-625[UP5];6-7,620-620[AILq];24-24,603-603[UP3]	.((((((((((((((((.-((((.&.))))..)))))))))))))))).	ACAGCAACUGGUAAAGCA-AGCAC&UUGUUGGGCUUUAUCAGUUGCUGG	0	0	NA	NA	NA	0	0	NA	NA	NA	2	53.6509	2	0.889631	Output/S24h/cleaveLand_result/t_plot/PC-3p-12333_982_XM_016104995.2_617_TPlot.pdf	0	0	53.6509	5.0035e-24	2.27989e-23	yes	GO:0005488(binding);GO:1901363(heterocyclic compound binding);GO:0003676(nucleic acid binding);GO:0097159(organic cyclic compound binding)	ko03013(RNA transport);ko03008(Ribosome biogenesis in eukaryotes)
PC-3p-12333_982	XM_016107701.2	597	622	613	-42.7	-27.8	0.651054	7	1-5,622-618;7-15,616-608;17-24,604-597	6-6,617-617[SIL];16-16,607-605[AILt]	((((((((...(((((((((.(((((&))))).)))))))))--.))))))))	CUAGCAACAAAGAUAAAGCUGAACAG&UUGUUGGGCUUUAUC--AGUUGCUGG	1	30.281	4	0.999997	Output/S0h/cleaveLand_result/t_plot/PC-3p-12333_982_XM_016107701.2_613_TPlot.pdf	0	0	NA	NA	NA	2	53.6509	2	0.99287	Output/S24h/cleaveLand_result/t_plot/PC-3p-12333_982_XM_016107701.2_613_TPlot.pdf	30.281	0	53.6509	5.8531e-12	6.61749e-12	yes	NA	NA
PC-3p-12333_982	XM_016109399.2	510	533	524	-42.7	-27.9	0.653396	10	3-12,531-522;14-18,520-516;20-22,514-512	1-2,533-532[UP5];13-13,521-521[SIL];19-19,515-515[SIL];23-24,511-510[UP3]	..(((.(((((.((((((((((..&..)))))))))).))))).)))..	CAAGCUGCUGGCGAGGCCCAACGU&UUGUUGGGCUUUAUCAGUUGCUGG	1	30.281	4	0.999995	Output/S0h/cleaveLand_result/t_plot/PC-3p-12333_982_XM_016109399.2_524_TPlot.pdf	3	99.9134	2	0.981591	Output/S8h/cleaveLand_result/t_plot/PC-3p-12333_982_XM_016109399.2_524_TPlot.pdf	0	0	NA	NA	NA	30.281	99.9134	0	5.4045e-27	3.2466e-26	yes	GO:0005737(cytoplasm);GO:0006950(response to stress);GO:0008152(metabolic process);GO:0009987(cellular process);GO:0071704(organic substance metabolic process);GO:0006767(water-soluble vitamin metabolic process);GO:0019438(aromatic compound biosynthetic process);GO:0006725(cellular aromatic compound metabolic process);GO:0044446(intracellular organelle part);GO:0043227(membrane-bounded organelle)…	ko00730(Thiamine metabolism);ko01100(Metabolic pathways)
PC-3p-12333_982	XM_016111496.2	723	747	738	-42.7	-27.8	0.651054	7	2-2,746-746;4-14,744-734;17-18,731-730;19-24,728-723	1-1,747-747[UP5];3-3,745-745[SIL];15-16,733-732[SIL];x-x,729-729[BULt]	((((((.((..(((((((((((.(.&.).)))))))))))..))-))))))	CCAGCAGACCCAUGAAGCCCAAGAU&UUGUUGGGCUUUAUCAGU-UGCUGG	1	30.281	4	0.999997	Output/S0h/cleaveLand_result/t_plot/PC-3p-12333_982_XM_016111496.2_738_TPlot.pdf	0	0	NA	NA	NA	1	26.8255	4	0.999999	Output/S24h/cleaveLand_result/t_plot/PC-3p-12333_982_XM_016111496.2_738_TPlot.pdf	30.281	0	26.8255	5.3891e-07	5.57092e-07	yes	GO:0016021(integral component of membrane);GO:0044425(membrane part);GO:0031224(intrinsic component of membrane);GO:0016020(membrane)	NA
PC-3p-12333_982	XM_016112947.2	476	501	490	-42.7	-29.2	0.683841	13	1-7,501-495;8-21,492-479	x-x,494-493[BULt];22-24,478-476[UP3]	...((((((((((((((..(((((((&)))))))--))))))))))))))...	GUCGCAGCUGGUGGAGCCACCGGCGA&UUGUUGG--GCUUUAUCAGUUGCUGG	1	30.281	4	0.997446	Output/S0h/cleaveLand_result/t_plot/PC-3p-12333_982_XM_016112947.2_490_TPlot.pdf	0	0	NA	NA	NA	0	0	NA	NA	NA	30.281	0	0	7.0631e-14	1.09903e-13	yes	NA	NA
PC-3p-12333_982	XM_016113065.2	1815	1837	1829	-42.7	-27.96	0.654801	12	2-9,1836-1829;17-24,1822-1815	1-1,1837-1837[UP5];10-16,1828-1823[AILq]	((((((((......-((((((((.&.)))))))).......))))))))	CCAGCAACAAUCUU-GCCCAGCAC&UUGUUGGGCUUUAUCAGUUGCUGG	0	0	NA	NA	NA	0	0	NA	NA	NA	1	26.8255	4	0.999999	Output/S24h/cleaveLand_result/t_plot/PC-3p-12333_982_XM_016113065.2_1829_TPlot.pdf	0	0	26.8255	2.2374e-12	2.55455e-12	yes	NA	ko04136(Autophagy - other)
PC-3p-12333_982	XM_016114790.2	3512	3537	3529	-42.7	-29.42	0.688993	9.5	1-4,3537-3534;6-16,3533-3523;19-24,3517-3512	5-5,x-x[BULq];17-18,3522-3518[AILt]	((((((.....(((((((((((-((((&)))).)))))))))))---..))))))	CCGGCAGGGUGUGAUGAGGCCC-ACAA&UUGUUGGGCUUUAUCA---GUUGCUGG	0	0	NA	NA	NA	0	0	NA	NA	NA	1	26.8255	4	0.998327	Output/S24h/cleaveLand_result/t_plot/PC-3p-12333_982_XM_016114790.2_3529_TPlot.pdf	0	0	26.8255	2.2374e-12	2.55455e-12	yes	GO:0006793(phosphorus metabolic process);GO:0043412(macromolecule modification);GO:1901265(nucleoside phosphate binding);GO:0000166(nucleotide binding);GO:0006468(protein phosphorylation);GO:0097367(carbohydrate derivative binding);GO:0016310(phosphorylation);GO:0016020(membrane);GO:0030554(adenyl nucleotide binding);GO:0016772(transferase activity, transferring phosphorus-containing groups);GO:0…	ko04626(Plant-pathogen interaction);ko04016(MAPK signaling pathway - plant)
PC-3p-12333_982	XM_016117396.2	1293	1314	1307	-42.7	-30	0.702576	11.5	2-8,1313-1307;12-24,1305-1293	1-1,1314-1314[UP5];9-11,1306-1306[AILq]	(((((((((((((.--(((((((.&.)))))))...)))))))))))))	CCGGCGGCUGAUGC--CCCGGCAG&UUGUUGGGCUUUAUCAGUUGCUGG	10	302.81	2	0.681574	Output/S0h/cleaveLand_result/t_plot/PC-3p-12333_982_XM_016117396.2_1307_TPlot.pdf	2	66.6089	3	0.262213	Output/S8h/cleaveLand_result/t_plot/PC-3p-12333_982_XM_016117396.2_1307_TPlot.pdf	3	80.4764	3	0.312086	Output/S24h/cleaveLand_result/t_plot/PC-3p-12333_982_XM_016117396.2_1307_TPlot.pdf	302.81	66.6089	80.4764	1.2952e-51	4.75515e-50	yes	NA	NA
PC-3p-12333_982	XM_021127687.1	1359	1383	1373	-42.7	-30.2	0.70726	6	2-8,1382-1376;9-18,1374-1365;20-24,1363-1359	1-1,1383-1383[UP5];x-x,1375-1375[BULt];19-19,1364-1364[SIL]	(((((.((((((((((.(((((((.&.)))))))-)))))))))).)))))	CUGGUUGCUGAUAAAGUCCCAACAC&UUGUUGGG-CUUUAUCAGUUGCUGG	0	0	NA	NA	NA	1	33.3045	4	0.923776	Output/S8h/cleaveLand_result/t_plot/PC-3p-12333_982_XM_021127687.1_1373_TPlot.pdf	0	0	NA	NA	NA	0	33.3045	0	3.4347e-15	7.86611e-15	yes	GO:0016787(hydrolase activity);GO:0009251(glucan catabolic process);GO:0044238(primary metabolic process);GO:0004553(hydrolase activity, hydrolyzing O-glycosyl compounds);GO:0043170(macromolecule metabolic process);GO:0009056(catabolic process);GO:0008152(metabolic process);GO:0016052(carbohydrate catabolic process);GO:0009057(macromolecule catabolic process);GO:0005975(carbohydrate metabolic pro…	ko00940(Phenylpropanoid biosynthesis);ko01100(Metabolic pathways);ko00460(Cyanoamino acid metabolism);ko00500(Starch and sucrose metabolism);ko01110(Biosynthesis of secondary metabolites)
PC-3p-12333_982	XM_021128888.1	462	485	476	-42.7	-30.4	0.711944	10.5	2-5,484-481;7-10,479-476;13-24,473-462	1-1,485-485[UP5];6-6,480-480[SIL];11-12,475-474[SIL]	((((((((((((..((((.((((.&.)))).))))..))))))))))))	CCAGCAAUUGAUUUGGCUGAGCAU&UUGUUGGGCUUUAUCAGUUGCUGG	1	30.281	4	0.750009	Output/S0h/cleaveLand_result/t_plot/PC-3p-12333_982_XM_021128888.1_476_TPlot.pdf	0	0	NA	NA	NA	0	0	NA	NA	NA	30.281	0	0	7.0631e-14	1.09903e-13	yes	GO:0008270(zinc ion binding);GO:0044425(membrane part);GO:0016020(membrane);GO:0016021(integral component of membrane);GO:0031224(intrinsic component of membrane);GO:0005488(binding);GO:0043169(cation binding);GO:0043167(ion binding);GO:0046872(metal ion binding);GO:0046914(transition metal ion binding)	NA
PC-3p-12333_982	XM_021131518.1	1527	1551	1542	-42.7	-28.8	0.674473	9	3-16,1549-1536;18-24,1533-1527	1-2,1551-1550[UP5];17-17,1535-1534[AILt]	(((((((..((((((((((((((..&..))))))))))))))-.)))))))	UCAGCAGGAUGAUAAGGCUCAGCCU&UUGUUGGGCUUUAUCA-GUUGCUGG	1	30.281	4	0.999523	Output/S0h/cleaveLand_result/t_plot/PC-3p-12333_982_XM_021131518.1_1542_TPlot.pdf	0	0	NA	NA	NA	0	0	NA	NA	NA	30.281	0	0	7.0631e-14	1.09903e-13	yes	GO:0032549(ribonucleoside binding);GO:1901265(nucleoside phosphate binding);GO:0017111(nucleoside-triphosphatase activity);GO:0036094(small molecule binding);GO:0044249(cellular biosynthetic process);GO:0044238(primary metabolic process);GO:1901564(organonitrogen compound metabolic process);GO:0017076(purine nucleotide binding);GO:0003924(GTPase activity);GO:1901363(heterocyclic compound binding)…	ko03013(RNA transport)
PC-3p-12333_982	XM_021131735.1	592	619	610	-42.7	-28.6	0.669789	11	3-17,617-603;18-24,598-592	1-2,619-618[UP5];x-x,602-599[BULt]	(((((((....(((((((((((((((..&..)))))))))))))))----)))))))	CCAGCAAUGCCCUGAUAAGGUUCAAUGG&UUGUUGGGCUUUAUCAG----UUGCUGG	0	0	NA	NA	NA	0	0	NA	NA	NA	2	53.6509	2	0.964443	Output/S24h/cleaveLand_result/t_plot/PC-3p-12333_982_XM_021131735.1_610_TPlot.pdf	0	0	53.6509	5.0035e-24	2.27989e-23	yes	GO:0003824(catalytic activity);GO:0016757(transferase activity, transferring glycosyl groups);GO:0016740(transferase activity)	ko00052(Galactose metabolism)
PC-3p-12333_982	XM_021137292.1	957	985	971	-42.7	-28.2	0.660422	15.5	2-7,984-979;8-19,973-962;21-24,960-957	1-1,985-985[UP5];x-x,978-974[BULt];20-20,961-961[SIL]	((((.((((((((((((.....((((((.&.))))))-----)))))))))))).))))	CCAGGAAUUGAUGAGGUUUGCUCCAACAC&UUGUUGG-----GCUUUAUCAGUUGCUGG	1	30.281	4	0.999973	Output/S0h/cleaveLand_result/t_plot/PC-3p-12333_982_XM_021137292.1_971_TPlot.pdf	0	0	NA	NA	NA	0	0	NA	NA	NA	30.281	0	0	7.0631e-14	1.09903e-13	yes	GO:0072655(establishment of protein localization to mitochondrion);GO:0031224(intrinsic component of membrane);GO:0070727(cellular macromolecule localization);GO:0032555(purine ribonucleotide binding);GO:0006886(intracellular protein transport);GO:0043226(organelle);GO:1901265(nucleoside phosphate binding);GO:0044429(mitochondrial part);GO:0015031(protein transport);GO:0044237(cellular metabolic …	NA
PC-3p-12333_982	XM_021137293.1	1051	1079	1065	-42.7	-28.2	0.660422	15.5	2-7,1078-1073;8-19,1067-1056;21-24,1054-1051	1-1,1079-1079[UP5];x-x,1072-1068[BULt];20-20,1055-1055[SIL]	((((.((((((((((((.....((((((.&.))))))-----)))))))))))).))))	CCAGGAAUUGAUGAGGUUUGCUCCAACAC&UUGUUGG-----GCUUUAUCAGUUGCUGG	0	0	NA	NA	NA	1	33.3045	4	0.999967	Output/S8h/cleaveLand_result/t_plot/PC-3p-12333_982_XM_021137293.1_1065_TPlot.pdf	0	0	NA	NA	NA	0	33.3045	0	3.4347e-15	7.86611e-15	yes	GO:0072655(establishment of protein localization to mitochondrion);GO:0031224(intrinsic component of membrane);GO:0070727(cellular macromolecule localization);GO:0032555(purine ribonucleotide binding);GO:0006886(intracellular protein transport);GO:0043226(organelle);GO:1901265(nucleoside phosphate binding);GO:0044429(mitochondrial part);GO:0015031(protein transport);GO:0044237(cellular metabolic …	NA
PC-3p-12333_982	XM_021137298.1	816	844	830	-42.7	-28.2	0.660422	15.5	2-7,843-838;8-19,832-821;21-24,819-816	1-1,844-844[UP5];x-x,837-833[BULt];20-20,820-820[SIL]	((((.((((((((((((.....((((((.&.))))))-----)))))))))))).))))	CCAGGAAUUGAUGAGGUUUGCUCCAACAC&UUGUUGG-----GCUUUAUCAGUUGCUGG	1	30.281	4	0.999969	Output/S0h/cleaveLand_result/t_plot/PC-3p-12333_982_XM_021137298.1_830_TPlot.pdf	0	0	NA	NA	NA	0	0	NA	NA	NA	30.281	0	0	7.0631e-14	1.09903e-13	yes	GO:0072655(establishment of protein localization to mitochondrion);GO:0031224(intrinsic component of membrane);GO:0070727(cellular macromolecule localization);GO:0032555(purine ribonucleotide binding);GO:0006886(intracellular protein transport);GO:0043226(organelle);GO:1901265(nucleoside phosphate binding);GO:0044429(mitochondrial part);GO:0015031(protein transport);GO:0044237(cellular metabolic …	NA
PC-3p-12333_982	XM_021137300.1	886	914	900	-42.7	-28.2	0.660422	15.5	2-7,913-908;8-19,902-891;21-24,889-886	1-1,914-914[UP5];x-x,907-903[BULt];20-20,890-890[SIL]	((((.((((((((((((.....((((((.&.))))))-----)))))))))))).))))	CCAGGAAUUGAUGAGGUUUGCUCCAACAC&UUGUUGG-----GCUUUAUCAGUUGCUGG	0	0	NA	NA	NA	1	33.3045	4	0.999953	Output/S8h/cleaveLand_result/t_plot/PC-3p-12333_982_XM_021137300.1_900_TPlot.pdf	0	0	NA	NA	NA	0	33.3045	0	3.4347e-15	7.86611e-15	yes	GO:0072655(establishment of protein localization to mitochondrion);GO:0031224(intrinsic component of membrane);GO:0070727(cellular macromolecule localization);GO:0032555(purine ribonucleotide binding);GO:0006886(intracellular protein transport);GO:0043226(organelle);GO:1901265(nucleoside phosphate binding);GO:0044429(mitochondrial part);GO:0015031(protein transport);GO:0044237(cellular metabolic …	NA
PC-3p-12333_982	XM_021142129.1	48	77	68	-42.7	-29.86	0.699297	12	1-15,77-63;17-24,55-48	16-16,62-56[AILt]	((((((((.......(((((((((((((((&)))))))))))))))------.))))))))	CCGGCGGCACGGUUCGGUGAAGCCUAACGA&UUGUUGGGCUUUAUC------AGUUGCUGG	0	0	NA	NA	NA	0	0	NA	NA	NA	1	26.8255	4	0.983323	Output/S24h/cleaveLand_result/t_plot/PC-3p-12333_982_XM_021142129.1_68_TPlot.pdf	0	0	26.8255	2.2374e-12	2.55455e-12	yes	GO:0017076(purine nucleotide binding);GO:0032555(purine ribonucleotide binding);GO:0006796(phosphate-containing compound metabolic process);GO:0019538(protein metabolic process);GO:0036094(small molecule binding);GO:0000166(nucleotide binding);GO:0005524(ATP binding);GO:1901363(heterocyclic compound binding);GO:0016740(transferase activity);GO:0004674(protein serine/threonine kinase activity);GO:…	NA
PC-3p-12333_982	XM_021143003.1	274	297	288	-42.7	-28.2	0.660422	8	1-5,297-293;7-12,291-286;14-22,284-276	6-6,292-292[SIL];13-13,285-285[SIL];23-24,275-274[UP3]	..(((((((((.((((((.(((((&))))).)))))).)))))))))..	GAGGCAGCUGAAGAAGCUGAACAA&UUGUUGGGCUUUAUCAGUUGCUGG	0	0	NA	NA	NA	1	33.3045	4	0.999961	Output/S8h/cleaveLand_result/t_plot/PC-3p-12333_982_XM_021143003.1_288_TPlot.pdf	0	0	NA	NA	NA	0	33.3045	0	3.4347e-15	7.86611e-15	yes	GO:0005622(intracellular);GO:0009987(cellular process);GO:0003886(DNA (cytosine-5-)-methyltransferase activity);GO:0044238(primary metabolic process);GO:0006304(DNA modification);GO:0044237(cellular metabolic process);GO:0090116(C-5 methylation of cytosine);GO:0006305(DNA alkylation);GO:0003824(catalytic activity);GO:0006259(DNA metabolic process);GO:0005623(cell);GO:1901360(organic cyclic compou…	ko01100(Metabolic pathways);ko00270(Cysteine and methionine metabolism)
PC-3p-123460_58	BGI_novel_T005315	147	171	161	-38.7	-27	0.697674	15	6-8,166-164;10-22,161-149	1-5,171-167[UP5];9-9,163-162[AILt];23-24,148-147[UP3]	..(((((((((((((..(((.....&.....)))-.)))))))))))))..	UCUCAGACCCUCCGAACUUGAAGAA&AAAUACAA-AUCGGAGGGUCUGAUU	0	0	NA	NA	NA	0	0	NA	NA	NA	1	26.8255	4	0.695072	Output/S24h/cleaveLand_result/t_plot/PC-3p-123460_58_BGI_novel_T005315_161_TPlot.pdf	0	0	26.8255	2.2374e-12	2.55455e-12	yes	GO:0050789(regulation of biological process);GO:0030234(enzyme regulator activity);GO:0006810(transport);GO:0060341(regulation of cellular localization);GO:0060589(nucleoside-triphosphatase regulator activity);GO:0044425(membrane part);GO:0048209(regulation of vesicle targeting, to, from or within Golgi);GO:0009306(protein secretion);GO:0016491(oxidoreductase activity);GO:0016628(oxidoreductase a…	ko04141(Protein processing in endoplasmic reticulum)
PC-3p-123460_58	BGI_novel_T006070	287	310	301	-38.7	-26.1	0.674419	8.5	1-10,310-301;12-14,299-297;16-22,295-289	11-11,300-300[SIL];15-15,296-296[SIL];23-24,288-287[UP3]	..(((((((.(((.((((((((((&)))))))))).))).)))))))..	GCUCAGGCCGUCUUGUUUGUGUUU&AAAUACAAAUCGGAGGGUCUGAUU	0	0	NA	NA	NA	1	33.3045	4	0.714961	Output/S8h/cleaveLand_result/t_plot/PC-3p-123460_58_BGI_novel_T006070_301_TPlot.pdf	0	0	NA	NA	NA	0	33.3045	0	3.4347e-15	7.86611e-15	yes	GO:0071556(integral component of lumenal side of endoplasmic reticulum membrane);GO:0006518(peptide metabolic process);GO:0098827(endoplasmic reticulum subcompartment);GO:0097708(intracellular vesicle);GO:0043603(cellular amide metabolic process);GO:0004175(endopeptidase activity);GO:0016787(hydrolase activity);GO:0031984(organelle subcompartment);GO:0098553(lumenal side of endoplasmic reticulum …	NA
PC-3p-123460_58	XM_016098700.2	1078	1100	1091	-38.7	-25.6	0.661499	9.5	2-6,1099-1095;8-13,1093-1088;15-21,1087-1081	1-1,1100-1100[UP5];7-7,1094-1094[SIL];14-14,x-x[BULq];22-24,1080-1078[UP3]	...(((((((-((((((.(((((.&.))))).)))))).)))))))...	AACCGGACCC-CCGGUUCGUGUUC&AAAUACAAAUCGGAGGGUCUGAUU	1	30.281	4	0.808841	Output/S0h/cleaveLand_result/t_plot/PC-3p-123460_58_XM_016098700.2_1091_TPlot.pdf	0	0	NA	NA	NA	0	0	NA	NA	NA	30.281	0	0	7.0631e-14	1.09903e-13	yes	NA	ko03040(Spliceosome)
PC-3p-123460_58	XM_016117292.2	1880	1903	1894	-38.7	-25.5	0.658915	14.5	6-8,1898-1896;10-21,1894-1883	1-5,1903-1899[UP5];9-9,1895-1895[SIL];22-24,1882-1880[UP3]	...((((((((((((.(((.....&.....))).))))))))))))...	AUCCAGAUCCUCCGAGUUGGACAG&AAAUACAAAUCGGAGGGUCUGAUU	0	0	NA	NA	NA	2	66.6089	2	0.45276	Output/S8h/cleaveLand_result/t_plot/PC-3p-123460_58_XM_016117292.2_1894_TPlot.pdf	0	0	NA	NA	NA	0	66.6089	0	1.1789e-29	9.89421e-29	yes	GO:0016020(membrane);GO:0016021(integral component of membrane);GO:0031224(intrinsic component of membrane);GO:0044425(membrane part)	ko01100(Metabolic pathways);ko00600(Sphingolipid metabolism)
PC-3p-123460_58	XM_021128730.1	1178	1200	1191	-38.7	-25.6	0.661499	9.5	3-17,1198-1184;19-21,1183-1181	1-2,1200-1199[UP5];18-18,x-x[BULq];22-24,1180-1178[UP3]	...(((-(((((((((((((((..&..))))))))))))))).)))...	UACCAG-CCUUCUGAUUUGUGUAG&AAAUACAAAUCGGAGGGUCUGAUU	1	30.281	4	0.821244	Output/S0h/cleaveLand_result/t_plot/PC-3p-123460_58_XM_021128730.1_1191_TPlot.pdf	0	0	NA	NA	NA	0	0	NA	NA	NA	30.281	0	0	7.0631e-14	1.09903e-13	yes	GO:0044464(cell part);GO:0016021(integral component of membrane);GO:0016020(membrane);GO:0044425(membrane part);GO:0043231(intracellular membrane-bounded organelle);GO:0044424(intracellular part);GO:0043229(intracellular organelle);GO:0043226(organelle);GO:0043227(membrane-bounded organelle);GO:0005622(intracellular);GO:0005623(cell);GO:0005634(nucleus);GO:0031224(intrinsic component of membrane)	NA
PC-3p-123460_58	XM_021128731.1	1088	1110	1101	-38.7	-25.6	0.661499	9.5	3-17,1108-1094;19-21,1093-1091	1-2,1110-1109[UP5];18-18,x-x[BULq];22-24,1090-1088[UP3]	...(((-(((((((((((((((..&..))))))))))))))).)))...	UACCAG-CCUUCUGAUUUGUGUAG&AAAUACAAAUCGGAGGGUCUGAUU	1	30.281	4	0.813068	Output/S0h/cleaveLand_result/t_plot/PC-3p-123460_58_XM_021128731.1_1101_TPlot.pdf	0	0	NA	NA	NA	0	0	NA	NA	NA	30.281	0	0	7.0631e-14	1.09903e-13	yes	GO:0044464(cell part);GO:0016021(integral component of membrane);GO:0016020(membrane);GO:0044425(membrane part);GO:0043231(intracellular membrane-bounded organelle);GO:0044424(intracellular part);GO:0043229(intracellular organelle);GO:0043226(organelle);GO:0043227(membrane-bounded organelle);GO:0005622(intracellular);GO:0005623(cell);GO:0005634(nucleus);GO:0031224(intrinsic component of membrane)	NA
PC-3p-123460_58	XM_021128732.1	1178	1200	1191	-38.7	-25.6	0.661499	9.5	3-17,1198-1184;19-21,1183-1181	1-2,1200-1199[UP5];18-18,x-x[BULq];22-24,1180-1178[UP3]	...(((-(((((((((((((((..&..))))))))))))))).)))...	UACCAG-CCUUCUGAUUUGUGUAG&AAAUACAAAUCGGAGGGUCUGAUU	1	30.281	4	0.804519	Output/S0h/cleaveLand_result/t_plot/PC-3p-123460_58_XM_021128732.1_1191_TPlot.pdf	0	0	NA	NA	NA	0	0	NA	NA	NA	30.281	0	0	7.0631e-14	1.09903e-13	yes	GO:0044464(cell part);GO:0016021(integral component of membrane);GO:0016020(membrane);GO:0044425(membrane part);GO:0043231(intracellular membrane-bounded organelle);GO:0044424(intracellular part);GO:0043229(intracellular organelle);GO:0043226(organelle);GO:0043227(membrane-bounded organelle);GO:0005622(intracellular);GO:0005623(cell);GO:0005634(nucleus);GO:0031224(intrinsic component of membrane)	NA
PC-3p-124350_58	BGI_novel_T003600	789	811	802	-36.6	-25.8	0.704918	8	4-12,808-800;14-19,799-794;21-24,792-789	1-3,811-809[UP5];13-13,x-x[BULq];20-20,793-793[SIL]	((((.((((((-(((((((((...&...))))))))).)))))).))))	GGUAUAUCCGC-AUCCGAUCUCAG&AUAAGAUCGGAUUGUGGAUUUAUC	0	0	NA	NA	NA	1	33.3045	4	0.208644	Output/S8h/cleaveLand_result/t_plot/PC-3p-124350_58_BGI_novel_T003600_802_TPlot.pdf	0	0	NA	NA	NA	0	33.3045	0	3.4347e-15	7.86611e-15	yes	NA	ko03420(Nucleotide excision repair);ko03430(Mismatch repair);ko03030(DNA replication);ko03440(Homologous recombination)
PC-3p-124350_58	BGI_novel_T003932	204	226	217	-36.6	-24.3	0.663934	9.5	4-12,223-215;14-22,214-206	1-3,226-224[UP5];13-13,x-x[BULq];23-24,205-204[UP3]	..(((((((((-(((((((((...&...))))))))).)))))))))..	UCUGAAUCCAC-AUCUGAUCUAAG&AUAAGAUCGGAUUGUGGAUUUAUC	0	0	NA	NA	NA	1	33.3045	4	0.696176	Output/S8h/cleaveLand_result/t_plot/PC-3p-124350_58_BGI_novel_T003932_217_TPlot.pdf	0	0	NA	NA	NA	0	33.3045	0	3.4347e-15	7.86611e-15	yes	NA	NA
PC-3p-124350_58	XM_016079644.2	1371	1403	1394	-36.6	-25.5	0.696721	22.5	2-12,1402-1392;13-13,1382-1382;15-24,1380-1371	1-1,1403-1403[UP5];x-x,1391-1383[BULt];14-14,1381-1381[SIL]	((((((((((.(.........(((((((((((.&.)))))))))))---------).))))))))))	GGUAAGUCCAGGAGCAUGGCUGUCCGAUCUUAC&AUAAGAUCGGAU---------UGUGGAUUUAUC	1	30.281	4	0.360586	Output/S0h/cleaveLand_result/t_plot/PC-3p-124350_58_XM_016079644.2_1394_TPlot.pdf	0	0	NA	NA	NA	0	0	NA	NA	NA	30.281	0	0	7.0631e-14	1.09903e-13	yes	NA	NA
PC-3p-124350_58	XM_016082326.1	297	321	312	-36.6	-24.6	0.672131	13	7-21,315-301;23-24,298-297	1-6,321-316[UP5];22-22,300-299[AILt]	((..(((((((((((((((......&......)))))))))))))))-.))	GAGCAAAUCCACAAUCCGAACACCU&AUAAGAUCGGAUUGUGGAUUU-AUC	0	0	NA	NA	NA	1	33.3045	4	0.607817	Output/S8h/cleaveLand_result/t_plot/PC-3p-124350_58_XM_016082326.1_312_TPlot.pdf	0	0	NA	NA	NA	0	33.3045	0	3.4347e-15	7.86611e-15	yes	NA	NA
PC-3p-124350_58	XM_016088092.2	300	323	314	-36.6	-24.4	0.666667	12.5	5-21,319-303;24-24,300-300	1-4,323-320[UP5];22-23,302-301[SIL]	(..(((((((((((((((((....&....)))))))))))))))))..)	GUGAGGUCCACGGUUCGAUCCCAC&AUAAGAUCGGAUUGUGGAUUUAUC	2	60.562	3	0.103758	Output/S0h/cleaveLand_result/t_plot/PC-3p-124350_58_XM_016088092.2_314_TPlot.pdf	1	33.3045	4	0.654813	Output/S8h/cleaveLand_result/t_plot/PC-3p-124350_58_XM_016088092.2_314_TPlot.pdf	0	0	NA	NA	NA	60.562	33.3045	0	1.6983e-13	2.61781e-13	yes	GO:0046872(metal ion binding);GO:0009636(response to toxic substance);GO:0006979(response to oxidative stress);GO:0009664(plant-type cell wall organization);GO:0042743(hydrogen peroxide metabolic process);GO:0005488(binding);GO:0050896(response to stimulus);GO:0005618(cell wall);GO:0009505(plant-type cell wall);GO:0016043(cellular component organization);GO:0071554(cell wall organization or bioge…	ko00940(Phenylpropanoid biosynthesis);ko01100(Metabolic pathways);ko01110(Biosynthesis of secondary metabolites)
PC-3p-124350_58	XM_016092863.2	534	560	551	-36.6	-24.3	0.663934	15	4-12,557-549;13-21,545-537	1-3,560-558[UP5];x-x,548-546[BULt];22-24,536-534[UP3]	...(((((((((...(((((((((...&...)))))))))---)))))))))...	UCCAAGUCCGCAAUCAUCCGAUCUACA&AUAAGAUCGGAU---UGUGGAUUUAUC	2	60.562	3	0.138414	Output/S0h/cleaveLand_result/t_plot/PC-3p-124350_58_XM_016092863.2_551_TPlot.pdf	5	166.522	2	0.389768	Output/S8h/cleaveLand_result/t_plot/PC-3p-124350_58_XM_016092863.2_551_TPlot.pdf	3	80.4764	2	0.449583	Output/S24h/cleaveLand_result/t_plot/PC-3p-124350_58_XM_016092863.2_551_TPlot.pdf	60.562	166.522	80.4764	3.6663e-14	8.06128e-14	yes	NA	NA
PC-3p-124350_58	XM_021125692.1	1934	1957	1948	-36.6	-24.2	0.661202	11.5	4-6,1954-1952;8-11,1950-1947;13-24,1945-1934	1-3,1957-1955[UP5];7-7,1951-1951[SIL];12-12,1946-1946[SIL]	((((((((((((.((((.(((...&...))).)))).))))))))))))	GGUGGAUCCACAUUCUGUUCUCCA&AUAAGAUCGGAUUGUGGAUUUAUC	0	0	NA	NA	NA	0	0	NA	NA	NA	1	26.8255	4	0.889027	Output/S24h/cleaveLand_result/t_plot/PC-3p-124350_58_XM_021125692.1_1948_TPlot.pdf	0	0	26.8255	2.2374e-12	2.55455e-12	yes	GO:0043226(organelle);GO:0005488(binding);GO:0007017(microtubule-based process);GO:1901363(heterocyclic compound binding);GO:0017111(nucleoside-triphosphatase activity);GO:0016787(hydrolase activity);GO:0005623(cell);GO:0031122(cytoplasmic microtubule organization);GO:0097435(supramolecular fiber organization);GO:0006996(organelle organization);GO:0000166(nucleotide binding);GO:1901265(nucleoside…	ko03013(RNA transport)
PC-3p-124350_58	XM_021133820.1	470	493	484	-36.6	-25.7	0.702186	8	1-11,493-483;13-20,481-474	12-12,482-482[SIL];21-24,473-470[UP3]	....((((((((.(((((((((((&))))))))))).))))))))....	UUUCAAUCCACACUCUGAUCUUGU&AUAAGAUCGGAUUGUGGAUUUAUC	1	30.281	4	0.268781	Output/S0h/cleaveLand_result/t_plot/PC-3p-124350_58_XM_021133820.1_484_TPlot.pdf	0	0	NA	NA	NA	0	0	NA	NA	NA	30.281	0	0	7.0631e-14	1.09903e-13	yes	GO:0031224(intrinsic component of membrane);GO:0016020(membrane);GO:0044425(membrane part);GO:0016021(integral component of membrane)	NA
PC-3p-124677_58	BGI_novel_T000725	394	416	408	-43.7	-31.7	0.7254	7	2-6,415-411;8-12,410-406;15-24,403-394	1-1,416-416[UP5];7-7,x-x[BULq];13-14,405-404[SIL]	((((((((((..(((((-(((((.&.))))).)))))..))))))))))	GGUGCAGGAAGAGGAGC-UCCGAA&AUCGGACGUUCCGAUUUCUGUACC	0	0	NA	NA	NA	0	0	NA	NA	NA	1	26.8255	4	0.0730071	Output/S24h/cleaveLand_result/t_plot/PC-3p-124677_58_BGI_novel_T000725_408_TPlot.pdf	0	0	26.8255	2.2374e-12	2.55455e-12	yes	GO:0006725(cellular aromatic compound metabolic process);GO:0000166(nucleotide binding);GO:0097367(carbohydrate derivative binding);GO:0043168(anion binding);GO:0008026(ATP-dependent helicase activity);GO:0044428(nuclear part);GO:0070035(purine NTP-dependent helicase activity);GO:0043170(macromolecule metabolic process);GO:0032553(ribonucleotide binding);GO:0043233(organelle lumen);GO:0016787(hyd…	ko03040(Spliceosome)
PC-3p-124677_58	BGI_novel_T000726	394	416	408	-43.7	-31.7	0.7254	7	2-6,415-411;8-12,410-406;15-24,403-394	1-1,416-416[UP5];7-7,x-x[BULq];13-14,405-404[SIL]	((((((((((..(((((-(((((.&.))))).)))))..))))))))))	GGUGCAGGAAGAGGAGC-UCCGAA&AUCGGACGUUCCGAUUUCUGUACC	0	0	NA	NA	NA	0	0	NA	NA	NA	1	26.8255	4	0.140684	Output/S24h/cleaveLand_result/t_plot/PC-3p-124677_58_BGI_novel_T000726_408_TPlot.pdf	0	0	26.8255	2.2374e-12	2.55455e-12	yes	GO:0006725(cellular aromatic compound metabolic process);GO:0000166(nucleotide binding);GO:0097367(carbohydrate derivative binding);GO:0043168(anion binding);GO:0008026(ATP-dependent helicase activity);GO:0044428(nuclear part);GO:0070035(purine NTP-dependent helicase activity);GO:0043170(macromolecule metabolic process);GO:0032553(ribonucleotide binding);GO:0043233(organelle lumen);GO:0016787(hyd…	ko03040(Spliceosome)
PC-3p-124677_58	XM_016076322.2	482	510	495	-43.7	-29.1	0.665904	15	2-6,509-505;7-9,502-500;10-16,495-489;18-24,488-482	1-1,510-510[UP5];x-x,504-503[BULt];x-x,499-496[BULt];17-17,x-x[BULq]	(((((((-(((((((....(((..(((((.&.)))))--)))----))))))).)))))))	GGUACAG-AAUCGGAGAAGGCGGUUCCGAG&AUCGGA--CGU----UCCGAUUUCUGUACC	1	30.281	4	0.60019	Output/S0h/cleaveLand_result/t_plot/PC-3p-124677_58_XM_016076322.2_495_TPlot.pdf	0	0	NA	NA	NA	0	0	NA	NA	NA	30.281	0	0	7.0631e-14	1.09903e-13	yes	GO:0065007(biological regulation);GO:2001141(regulation of RNA biosynthetic process);GO:0019219(regulation of nucleobase-containing compound metabolic process);GO:0050794(regulation of cellular process);GO:0005622(intracellular);GO:0031323(regulation of cellular metabolic process);GO:0003677(DNA binding);GO:2000112(regulation of cellular macromolecule biosynthetic process);GO:1901363(heterocyclic…	ko04016(MAPK signaling pathway - plant)
PC-3p-124677_58	XM_016092951.2	4410	4431	4422	-43.7	-29.6	0.677346	8	2-4,4430-4428;7-12,4425-4420;15-24,4419-4410	1-1,4431-4431[UP5];5-6,4427-4426[SIL];13-14,x-x[BULq]	((((((((((--((((((..(((.&.)))..))))))..))))))))))	GGUGCAGAAG--GGAACGGACGAG&AUCGGACGUUCCGAUUUCUGUACC	0	0	NA	NA	NA	3	99.9134	2	0.11616	Output/S8h/cleaveLand_result/t_plot/PC-3p-124677_58_XM_016092951.2_4422_TPlot.pdf	1	26.8255	4	0.349222	Output/S24h/cleaveLand_result/t_plot/PC-3p-124677_58_XM_016092951.2_4422_TPlot.pdf	0	99.9134	26.8255	3.2338e-28	2.59555e-27	yes	GO:0005515(protein binding);GO:0016772(transferase activity, transferring phosphorus-containing groups);GO:0003779(actin binding);GO:0006796(phosphate-containing compound metabolic process);GO:0009987(cellular process);GO:0016740(transferase activity);GO:0016301(kinase activity);GO:0016310(phosphorylation);GO:0006793(phosphorus metabolic process);GO:0003824(catalytic activity);GO:0005488(binding)…	NA
PC-3p-124677_58	XM_016093018.2	666	692	682	-43.7	-28.5	0.652174	8	2-8,691-685;9-16,683-676;17-21,674-670;22-24,668-666	1-1,692-692[UP5];x-x,684-684[BULt];x-x,675-675[BULt];x-x,669-669[BULt]	(((.(((((.((((((((.(((((((.&.)))))))-))))))))-)))))-)))	GGUCACAGAUAAUCGGGAGUGUCUGAA&AUCGGACG-UUCCGAUU-UCUGU-ACC	0	0	NA	NA	NA	0	0	NA	NA	NA	1	26.8255	4	0.864165	Output/S24h/cleaveLand_result/t_plot/PC-3p-124677_58_XM_016093018.2_682_TPlot.pdf	0	0	26.8255	2.2374e-12	2.55455e-12	yes	GO:0051649(establishment of localization in cell);GO:0005622(intracellular);GO:0005623(cell);GO:0010605(negative regulation of macromolecule metabolic process);GO:0051172(negative regulation of nitrogen compound metabolic process);GO:0070727(cellular macromolecule localization);GO:0065007(biological regulation);GO:0006612(protein targeting to membrane);GO:0070972(protein localization to endoplasm…	ko03060(Protein export)
PC-3p-124677_58	XM_016093019.2	534	560	550	-43.7	-28.5	0.652174	8	2-8,559-553;9-16,551-544;17-21,542-538;22-24,536-534	1-1,560-560[UP5];x-x,552-552[BULt];x-x,543-543[BULt];x-x,537-537[BULt]	(((.(((((.((((((((.(((((((.&.)))))))-))))))))-)))))-)))	GGUCACAGAUAAUCGGGAGUGUCUGAA&AUCGGACG-UUCCGAUU-UCUGU-ACC	0	0	NA	NA	NA	0	0	NA	NA	NA	1	26.8255	4	0.867554	Output/S24h/cleaveLand_result/t_plot/PC-3p-124677_58_XM_016093019.2_550_TPlot.pdf	0	0	26.8255	2.2374e-12	2.55455e-12	yes	GO:0051649(establishment of localization in cell);GO:0005622(intracellular);GO:0005623(cell);GO:0010605(negative regulation of macromolecule metabolic process);GO:0051172(negative regulation of nitrogen compound metabolic process);GO:0070727(cellular macromolecule localization);GO:0065007(biological regulation);GO:0006612(protein targeting to membrane);GO:0070972(protein localization to endoplasm…	ko03060(Protein export)
PC-3p-124677_58	XM_016108371.2	1505	1536	1527	-43.7	-28.6	0.654462	14	2-3,1535-1534;5-15,1532-1522;16-24,1513-1505	1-1,1536-1536[UP5];4-4,1533-1533[SIL];x-x,1521-1514[BULt]	(((((((((........(((((((((((.((.&.)).)))))))))))--------)))))))))	GGUACAGGGUGGUUAUUAUCGGAAUGUUGGAA&AUCGGACGUUCCGAU--------UUCUGUACC	0	0	NA	NA	NA	1	33.3045	4	0.764628	Output/S8h/cleaveLand_result/t_plot/PC-3p-124677_58_XM_016108371.2_1527_TPlot.pdf	0	0	NA	NA	NA	0	33.3045	0	3.4347e-15	7.86611e-15	yes	GO:0006820(anion transport);GO:0051234(establishment of localization);GO:0015098(molybdate ion transmembrane transporter activity);GO:0022857(transmembrane transporter activity);GO:0051179(localization);GO:0008509(anion transmembrane transporter activity);GO:0006811(ion transport);GO:0015075(ion transmembrane transporter activity);GO:0031224(intrinsic component of membrane);GO:0015698(inorganic a…	NA
PC-3p-127107_56	BGI_novel_T000220	1878	1898	1889	-36.6	-27.1	0.740437	11	6-20,1893-1879	1-5,1898-1894[UP5];21-21,1878-1878[UP3]	.(((((((((((((((.....&.....))))))))))))))).	AAUGGUUCCAAGGUUCAAAAU&UCUAAGAGCCUUGGAACCAUA	1	30.281	4	0.744356	Output/S0h/cleaveLand_result/t_plot/PC-3p-127107_56_BGI_novel_T000220_1889_TPlot.pdf	3	99.9134	2	0.357938	Output/S8h/cleaveLand_result/t_plot/PC-3p-127107_56_BGI_novel_T000220_1889_TPlot.pdf	0	0	NA	NA	NA	30.281	99.9134	0	5.4045e-27	3.2466e-26	yes	GO:0016705(oxidoreductase activity, acting on paired donors, with incorporation or reduction of molecular oxygen);GO:0046872(metal ion binding);GO:0043167(ion binding);GO:0016021(integral component of membrane);GO:0046906(tetrapyrrole binding);GO:0008152(metabolic process);GO:0016020(membrane);GO:0044425(membrane part);GO:0031224(intrinsic component of membrane);GO:0004497(monooxygenase activity)…	ko00906(Carotenoid biosynthesis)
PC-3p-127107_56	BGI_novel_T007530	731	751	743	-36.6	-23.9	0.653005	5.5	1-4,751-748;6-15,747-738;16-21,736-731	5-5,x-x[BULq];x-x,737-737[BULt]	((((((.((((((((((-((((&)))).))))))))))-))))))	UAUGGUGUUCAAGGUUC-UGGA&UCUAAGAGCCUUGGA-ACCAUA	0	0	NA	NA	NA	0	0	NA	NA	NA	1	26.8255	4	1	Output/S24h/cleaveLand_result/t_plot/PC-3p-127107_56_BGI_novel_T007530_743_TPlot.pdf	0	0	26.8255	2.2374e-12	2.55455e-12	yes	GO:0043226(organelle);GO:1901360(organic cyclic compound metabolic process);GO:0043170(macromolecule metabolic process);GO:0036094(small molecule binding);GO:0097159(organic cyclic compound binding);GO:0005488(binding);GO:0050794(regulation of cellular process);GO:0016070(RNA metabolic process);GO:0044238(primary metabolic process);GO:1901363(heterocyclic compound binding);GO:0044260(cellular mac…	NA
PC-3p-127107_56	BGI_novel_T007753	1363	1384	1374	-36.6	-24.2	0.661202	7	1-8,1384-1377;9-16,1375-1368	x-x,1376-1376[BULt];17-21,1367-1363[UP3]	.....((((((((.((((((((&))))))))-)))))))).....	AGCUAUUCCAAGGACUCUUAGA&UCUAAGAG-CCUUGGAACCAUA	1	30.281	4	0.999971	Output/S0h/cleaveLand_result/t_plot/PC-3p-127107_56_BGI_novel_T007753_1374_TPlot.pdf	0	0	NA	NA	NA	0	0	NA	NA	NA	30.281	0	0	7.0631e-14	1.09903e-13	yes	GO:0016070(RNA metabolic process);GO:0009451(RNA modification);GO:0071704(organic substance metabolic process);GO:0005623(cell);GO:0003723(RNA binding);GO:0046483(heterocycle metabolic process);GO:0043231(intracellular membrane-bounded organelle);GO:0001522(pseudouridine synthesis);GO:0097159(organic cyclic compound binding);GO:0006139(nucleobase-containing compound metabolic process);GO:0043229(…	NA
PC-3p-127107_56	BGI_novel_T008808	559	581	571	-36.6	-24.6	0.672131	8	1-2,581-580;3-16,578-565;17-18,563-562	x-x,579-579[BULt];x-x,564-564[BULt];19-21,561-559[UP3]	...((.((((((((((((((.((&))-))))))))))))))-))...	UAAGGUUUCCAAGGUUCUUGUGA&UC-UAAGAGCCUUGGAA-CCAUA	0	0	NA	NA	NA	1	33.3045	4	0.999006	Output/S8h/cleaveLand_result/t_plot/PC-3p-127107_56_BGI_novel_T008808_571_TPlot.pdf	0	0	NA	NA	NA	0	33.3045	0	3.4347e-15	7.86611e-15	yes	GO:0006351(transcription, DNA-templated);GO:0071704(organic substance metabolic process);GO:0009058(biosynthetic process);GO:0043226(organelle);GO:0034654(nucleobase-containing compound biosynthetic process);GO:0032774(RNA biosynthetic process);GO:0003700(DNA binding transcription factor activity);GO:0043229(intracellular organelle);GO:0006725(cellular aromatic compound metabolic process);GO:0009…	ko04626(Plant-pathogen interaction);ko04016(MAPK signaling pathway - plant)
PC-3p-127107_56	BGI_novel_T008812	2017	2038	2029	-36.6	-24.4	0.666667	12	6-13,2033-2026;14-19,2024-2019	1-5,2038-2034[UP5];x-x,2025-2025[BULt];20-21,2018-2017[UP3]	..((((((.((((((((.....&.....))))))))-))))))..	UCUGGUUCACAAGGCUCAUCUA&UCUAAGAGCCUUG-GAACCAUA	2	60.562	2	0.955422	Output/S0h/cleaveLand_result/t_plot/PC-3p-127107_56_BGI_novel_T008812_2029_TPlot.pdf	0	0	NA	NA	NA	0	0	NA	NA	NA	60.562	0	0	4.9856e-27	3.03728e-26	yes	GO:0044425(membrane part);GO:0016020(membrane);GO:0016021(integral component of membrane);GO:0031224(intrinsic component of membrane)	NA
PC-3p-127107_56	BGI_novel_T008904	2588	2611	2599	-36.6	-26.3	0.718579	11	1-3,2611-2609;4-6,2604-2602;8-20,2601-2589	x-x,2608-2605[BULt];7-7,x-x[BULq];21-21,2588-2588[UP3]	.(((((((((((((-(((....(((&)))----))).))))))))))))).	GAUGGUUCCAAGGC-CUUCCCAAGA&UCU----AAGAGCCUUGGAACCAUA	3	90.843	2	0.536074	Output/S0h/cleaveLand_result/t_plot/PC-3p-127107_56_BGI_novel_T008904_2599_TPlot.pdf	2	66.6089	2	0.516327	Output/S8h/cleaveLand_result/t_plot/PC-3p-127107_56_BGI_novel_T008904_2599_TPlot.pdf	4	107.302	2	0.584411	Output/S24h/cleaveLand_result/t_plot/PC-3p-127107_56_BGI_novel_T008904_2599_TPlot.pdf	90.843	66.6089	107.302	0.0086654	0.00879592	yes	NA	NA
PC-3p-127107_56	BGI_novel_T010547	1502	1523	1514	-36.6	-24.5	0.669399	5	1-12,1523-1512;14-17,1509-1506;19-21,1504-1502	13-13,1511-1510[AILt];18-18,1505-1505[SIL]	(((.((((..((((((((((((&))))))))))))-.)))).)))	UAUAGUUCUGGAGGCUCUUAGA&UCUAAGAGCCUU-GGAACCAUA	0	0	NA	NA	NA	1	33.3045	4	0.999507	Output/S8h/cleaveLand_result/t_plot/PC-3p-127107_56_BGI_novel_T010547_1514_TPlot.pdf	0	0	NA	NA	NA	0	33.3045	0	3.4347e-15	7.86611e-15	yes	GO:0009987(cellular process);GO:0015301(anion:anion antiporter activity);GO:0006839(mitochondrial transport);GO:0005623(cell);GO:0022804(active transmembrane transporter activity);GO:0031966(mitochondrial membrane);GO:0008509(anion transmembrane transporter activity);GO:0031967(organelle envelope);GO:0005743(mitochondrial inner membrane);GO:0051649(establishment of localization in cell);GO:007184…	NA
PC-3p-127107_56	BGI_novel_T011035	938	959	950	-36.6	-24.3	0.663934	6.5	1-5,959-955;7-14,953-946;15-18,944-941	6-6,954-954[SIL];x-x,945-945[BULt];19-21,940-938[UP3]	...((((.((((((((.(((((&))))).))))))))-))))...	CGGGGUUAUCAAGGCUGUUAGA&UCUAAGAGCCUUGG-AACCAUA	0	0	NA	NA	NA	0	0	NA	NA	NA	1	26.8255	4	0.999978	Output/S24h/cleaveLand_result/t_plot/PC-3p-127107_56_BGI_novel_T011035_950_TPlot.pdf	0	0	26.8255	2.2374e-12	2.55455e-12	yes	GO:1901265(nucleoside phosphate binding);GO:1901363(heterocyclic compound binding);GO:0043168(anion binding);GO:0015399(primary active transmembrane transporter activity);GO:0016462(pyrophosphatase activity);GO:0022804(active transmembrane transporter activity);GO:0005524(ATP binding);GO:0042623(ATPase activity, coupled);GO:0003824(catalytic activity);GO:0016887(ATPase activity);GO:0042910(xenobi…	ko00920(Sulfur metabolism);ko02010(ABC transporters);ko03018(RNA degradation)
PC-3p-127107_56	BGI_novel_T011833	744	764	755	-36.6	-23.9	0.653005	10.5	5-19,760-746	1-4,764-761[UP5];20-21,745-744[UP3]	..(((((((((((((((....&....)))))))))))))))..	CCUGGUUUCAAGGCUUUGUUU&UCUAAGAGCCUUGGAACCAUA	0	0	NA	NA	NA	1	33.3045	4	0.999997	Output/S8h/cleaveLand_result/t_plot/PC-3p-127107_56_BGI_novel_T011833_755_TPlot.pdf	0	0	NA	NA	NA	0	33.3045	0	3.4347e-15	7.86611e-15	yes	NA	NA
PC-3p-127107_56	XM_016077050.2	1586	1605	1597	-36.6	-25.3	0.691257	6	1-9,1605-1597;11-14,1596-1593;17-21,1590-1586	10-10,x-x[BULq];15-16,1592-1591[SIL]	(((((..((((-(((((((((&))))))))).))))..)))))	UAUGGGACCGA-GCUCUUGGA&UCUAAGAGCCUUGGAACCAUA	4	121.124	2	0.772885	Output/S0h/cleaveLand_result/t_plot/PC-3p-127107_56_XM_016077050.2_1597_TPlot.pdf	0	0	NA	NA	NA	1	26.8255	4	0.992381	Output/S24h/cleaveLand_result/t_plot/PC-3p-127107_56_XM_016077050.2_1597_TPlot.pdf	121.124	0	26.8255	2.2804e-36	3.66182e-35	yes	GO:0044237(cellular metabolic process);GO:0006099(tricarboxylic acid cycle);GO:0019752(carboxylic acid metabolic process);GO:0016740(transferase activity);GO:0072350(tricarboxylic acid metabolic process);GO:0046912(transferase activity, transferring acyl groups, acyl groups converted into alkyl on transfer);GO:0071704(organic substance metabolic process);GO:0044238(primary metabolic process);GO:0…	ko01210(2-Oxocarboxylic acid metabolism);ko00020(Citrate cycle (TCA cycle));ko01200(Carbon metabolism);ko01230(Biosynthesis of amino acids);ko01110(Biosynthesis of secondary metabolites);ko01100(Metabolic pathways);ko00630(Glyoxylate and dicarboxylate metabolism)
PC-3p-127107_56	XM_016077051.2	1664	1683	1675	-36.6	-25.3	0.691257	6	1-9,1683-1675;11-14,1674-1671;17-21,1668-1664	10-10,x-x[BULq];15-16,1670-1669[SIL]	(((((..((((-(((((((((&))))))))).))))..)))))	UAUGGGACCGA-GCUCUUGGA&UCUAAGAGCCUUGGAACCAUA	0	0	NA	NA	NA	1	33.3045	4	0.982806	Output/S8h/cleaveLand_result/t_plot/PC-3p-127107_56_XM_016077051.2_1675_TPlot.pdf	0	0	NA	NA	NA	0	33.3045	0	3.4347e-15	7.86611e-15	yes	GO:0044237(cellular metabolic process);GO:0006099(tricarboxylic acid cycle);GO:0019752(carboxylic acid metabolic process);GO:0016740(transferase activity);GO:0072350(tricarboxylic acid metabolic process);GO:0046912(transferase activity, transferring acyl groups, acyl groups converted into alkyl on transfer);GO:0071704(organic substance metabolic process);GO:0044238(primary metabolic process);GO:0…	ko01210(2-Oxocarboxylic acid metabolism);ko00020(Citrate cycle (TCA cycle));ko01200(Carbon metabolism);ko01230(Biosynthesis of amino acids);ko01110(Biosynthesis of secondary metabolites);ko01100(Metabolic pathways);ko00630(Glyoxylate and dicarboxylate metabolism)
PC-3p-127107_56	XM_016078484.2	1117	1137	1128	-36.6	-25.9	0.70765	7	1-3,1137-1135;6-15,1132-1123;17-21,1121-1117	4-5,1134-1133[SIL];16-16,1122-1122[SIL]	(((((.((((((((((..(((&)))..)))))))))).)))))	UGUGGAUCCAAGGCUUGAAGG&UCUAAGAGCCUUGGAACCAUA	0	0	NA	NA	NA	3	99.9134	2	0.578675	Output/S8h/cleaveLand_result/t_plot/PC-3p-127107_56_XM_016078484.2_1128_TPlot.pdf	2	53.6509	3	0.258271	Output/S24h/cleaveLand_result/t_plot/PC-3p-127107_56_XM_016078484.2_1128_TPlot.pdf	0	99.9134	53.6509	6.114e-22	2.68273e-21	yes	GO:0044260(cellular macromolecule metabolic process);GO:0008152(metabolic process);GO:0016740(transferase activity);GO:0032555(purine ribonucleotide binding);GO:0016773(phosphotransferase activity, alcohol group as acceptor);GO:0038023(signaling receptor activity);GO:1901363(heterocyclic compound binding);GO:0032553(ribonucleotide binding);GO:0005488(binding);GO:0043168(anion binding);GO:0004871(…	NA
PC-3p-127107_56	XM_016079164.2	2090	2110	2101	-36.6	-25.98	0.709836	8.5	1-3,2110-2108;7-21,2104-2090	4-6,2107-2105[SIL]	(((((((((((((((...(((&)))...)))))))))))))))	UAUGGUUCUAGGGCUGAAGGA&UCUAAGAGCCUUGGAACCAUA	1	30.281	4	0.926915	Output/S0h/cleaveLand_result/t_plot/PC-3p-127107_56_XM_016079164.2_2101_TPlot.pdf	1	33.3045	4	0.917006	Output/S8h/cleaveLand_result/t_plot/PC-3p-127107_56_XM_016079164.2_2101_TPlot.pdf	0	0	NA	NA	NA	30.281	33.3045	0	1.1203e-07	1.21623e-07	yes	NA	ko00640(Propanoate metabolism);ko01100(Metabolic pathways);ko01110(Biosynthesis of secondary metabolites);ko01212(Fatty acid metabolism);ko00061(Fatty acid biosynthesis);ko00620(Pyruvate metabolism)
PC-3p-127107_56	XM_016081303.2	322	343	333	-36.6	-23.9	0.653005	7.5	1-3,343-341;4-17,339-326	x-x,340-340[BULt];18-21,325-322[UP3]	....((((((((((((((.(((&)))-))))))))))))))....	UCACGUUCCAAGGUUCUUCAGG&UCU-AAGAGCCUUGGAACCAUA	0	0	NA	NA	NA	0	0	NA	NA	NA	1	26.8255	4	1	Output/S24h/cleaveLand_result/t_plot/PC-3p-127107_56_XM_016081303.2_333_TPlot.pdf	0	0	26.8255	2.2374e-12	2.55455e-12	yes	GO:0090304(nucleic acid metabolic process);GO:0046483(heterocycle metabolic process);GO:0034641(cellular nitrogen compound metabolic process);GO:0016740(transferase activity);GO:0016070(RNA metabolic process);GO:0006725(cellular aromatic compound metabolic process);GO:1901360(organic cyclic compound metabolic process);GO:0043412(macromolecule modification);GO:0006396(RNA processing);GO:0005488(bi…	NA
PC-3p-127107_56	XM_016085235.2	1284	1306	1295	-36.6	-23.8	0.650273	10	1-4,1306-1303;5-13,1300-1292;16-20,1289-1285	x-x,1302-1301[BULt];14-15,1291-1290[SIL];21-21,1284-1284[UP3]	.(((((..(((((((((..((((&))))--)))))))))..))))).	GAUGGUGACAGGGUUCUGAUGGA&UCUA--AGAGCCUUGGAACCAUA	0	0	NA	NA	NA	1	33.3045	4	0.999999	Output/S8h/cleaveLand_result/t_plot/PC-3p-127107_56_XM_016085235.2_1295_TPlot.pdf	0	0	NA	NA	NA	0	33.3045	0	3.4347e-15	7.86611e-15	yes	NA	NA
PC-3p-127107_56	XM_016085942.2	1113	1134	1125	-36.6	-23.8	0.650273	9	3-17,1132-1118;18-18,1116-1116	1-2,1134-1133[UP5];x-x,1117-1117[BULt];19-21,1115-1113[UP3]	...(.(((((((((((((((..&..)))))))))))))))-)...	UGGGUGUUCCAAGGUUCUUGUG&UCUAAGAGCCUUGGAAC-CAUA	0	0	NA	NA	NA	0	0	NA	NA	NA	1	26.8255	4	1	Output/S24h/cleaveLand_result/t_plot/PC-3p-127107_56_XM_016085942.2_1125_TPlot.pdf	0	0	26.8255	2.2374e-12	2.55455e-12	yes	GO:0008152(metabolic process);GO:0016787(hydrolase activity);GO:0003824(catalytic activity)	ko01110(Biosynthesis of secondary metabolites);ko00943(Isoflavonoid biosynthesis)
PC-3p-127107_56	XM_016086845.2	624	643	635	-36.6	-25.2	0.688525	6.5	1-3,643-641;7-21,638-624	4-6,640-639[AILq]	(((((((((((((((..-(((&)))...)))))))))))))))	UAUGGUUUCAAGGCUGA-AGA&UCUAAGAGCCUUGGAACCAUA	0	0	NA	NA	NA	1	33.3045	4	0.990918	Output/S8h/cleaveLand_result/t_plot/PC-3p-127107_56_XM_016086845.2_635_TPlot.pdf	0	0	NA	NA	NA	0	33.3045	0	3.4347e-15	7.86611e-15	yes	GO:0018108(peptidyl-tyrosine phosphorylation);GO:0006468(protein phosphorylation);GO:0006807(nitrogen compound metabolic process);GO:0071704(organic substance metabolic process);GO:1901265(nucleoside phosphate binding);GO:0005524(ATP binding);GO:0035639(purine ribonucleoside triphosphate binding);GO:0032559(adenyl ribonucleotide binding);GO:0003824(catalytic activity);GO:0006464(cellular protein …	ko04626(Plant-pathogen interaction)
PC-3p-127107_56	XM_016087059.2	1620	1641	1632	-36.6	-23.8	0.650273	9.5	1-10,1641-1632;12-18,1629-1623	11-11,1631-1630[AILt];19-21,1622-1620[UP3]	...(((((((..((((((((((&))))))))))-.)))))))...	AUGGGUUUCAUUGGCUUUUGGA&UCUAAGAGCC-UUGGAACCAUA	1	30.281	4	1	Output/S0h/cleaveLand_result/t_plot/PC-3p-127107_56_XM_016087059.2_1632_TPlot.pdf	0	0	NA	NA	NA	0	0	NA	NA	NA	30.281	0	0	7.0631e-14	1.09903e-13	yes	GO:0016021(integral component of membrane);GO:0044425(membrane part);GO:0016020(membrane);GO:0031224(intrinsic component of membrane)	ko03008(Ribosome biogenesis in eukaryotes)
PC-3p-127107_56	XM_016087079.2	666	687	677	-36.6	-26.5	0.724044	7	1-7,687-681;8-15,679-672;17-18,670-669	x-x,680-680[BULt];16-16,671-671[SIL];19-21,668-666[UP3]	...((.((((((((.(((((((&)))))))-)))))))).))...	ACAGGGUCCAAGGCUUCUUGGA&UCUAAGA-GCCUUGGAACCAUA	0	0	NA	NA	NA	1	33.3045	4	0.84943	Output/S8h/cleaveLand_result/t_plot/PC-3p-127107_56_XM_016087079.2_677_TPlot.pdf	0	0	NA	NA	NA	0	33.3045	0	3.4347e-15	7.86611e-15	yes	GO:0016740(transferase activity);GO:0009987(cellular process);GO:0006644(phospholipid metabolic process);GO:0008152(metabolic process);GO:0090407(organophosphate biosynthetic process);GO:0006657(CDP-choline pathway);GO:1901576(organic substance biosynthetic process);GO:0006629(lipid metabolic process);GO:0019637(organophosphate metabolic process);GO:0003824(catalytic activity);GO:0046486(glycerol…	ko00564(Glycerophospholipid metabolism);ko01100(Metabolic pathways)
PC-3p-127107_56	XM_016092749.2	455	478	469	-36.6	-23.8	0.650273	8.5	1-7,478-472;9-13,470-466;14-20,462-456	8-8,471-471[SIL];x-x,465-463[BULt];21-21,455-455[UP3]	.(((((((...(((((.(((((((&))))))).)))))---))))))).	GGUGGUUCUGUCAAGGGUUUUGGA&UCUAAGAGCCUUG---GAACCAUA	3	90.843	2	0.992779	Output/S0h/cleaveLand_result/t_plot/PC-3p-127107_56_XM_016092749.2_469_TPlot.pdf	0	0	NA	NA	NA	2	53.6509	3	0.800483	Output/S24h/cleaveLand_result/t_plot/PC-3p-127107_56_XM_016092749.2_469_TPlot.pdf	90.843	0	53.6509	1.5585e-19	6.61009e-19	yes	GO:0032774(RNA biosynthetic process);GO:0090304(nucleic acid metabolic process);GO:1901576(organic substance biosynthetic process);GO:0034654(nucleobase-containing compound biosynthetic process);GO:0043170(macromolecule metabolic process);GO:0006139(nucleobase-containing compound metabolic process);GO:0018130(heterocycle biosynthetic process);GO:0034641(cellular nitrogen compound metabolic proces…	NA
PC-3p-127107_56	XM_016093482.2	392	418	408	-36.6	-24.6	0.672131	12	1-3,418-416;5-15,413-403;16-19,397-394	4-4,415-414[AILt];x-x,402-398[BULt];20-21,393-392[UP3]	..((((.....(((((((((((..(((&)))-.)))))))))))-----))))..	CCUGGUUCCUUUCCGAGGCUCUGAAGA&UCU-AAGAGCCUUGGA-----ACCAUA	1	30.281	4	0.999376	Output/S0h/cleaveLand_result/t_plot/PC-3p-127107_56_XM_016093482.2_408_TPlot.pdf	4	133.218	2	0.909004	Output/S8h/cleaveLand_result/t_plot/PC-3p-127107_56_XM_016093482.2_408_TPlot.pdf	0	0	NA	NA	NA	30.281	133.218	0	1.3708e-39	2.35551e-38	yes	GO:0008152(metabolic process);GO:0003954(NADH dehydrogenase activity);GO:0016491(oxidoreductase activity);GO:0003824(catalytic activity);GO:0050136(NADH dehydrogenase (quinone) activity);GO:0008137(NADH dehydrogenase (ubiquinone) activity);GO:0016655(oxidoreductase activity, acting on NAD(P)H, quinone or similar compound as acceptor);GO:0016651(oxidoreductase activity, acting on NAD(P)H);GO:00551…	ko01100(Metabolic pathways);ko00190(Oxidative phosphorylation)
PC-3p-127107_56	XM_016094611.2	723	745	734	-36.6	-24.48	0.668852	10	1-5,745-741;8-20,736-724	6-7,740-737[AILt];21-21,723-723[UP3]	.(((((((((((((....(((((&)))))--..))))))))))))).	AGUGGUUUCAAGGCACGAUUAGA&UCUAA--GAGCCUUGGAACCAUA	0	0	NA	NA	NA	1	33.3045	4	0.999618	Output/S8h/cleaveLand_result/t_plot/PC-3p-127107_56_XM_016094611.2_734_TPlot.pdf	0	0	NA	NA	NA	0	33.3045	0	3.4347e-15	7.86611e-15	yes	GO:0046872(metal ion binding);GO:0016021(integral component of membrane);GO:0005506(iron ion binding);GO:0044425(membrane part);GO:0046914(transition metal ion binding);GO:0046906(tetrapyrrole binding);GO:0043167(ion binding);GO:0005488(binding);GO:0004497(monooxygenase activity);GO:0003824(catalytic activity);GO:0016705(oxidoreductase activity, acting on paired donors, with incorporation or redu…	ko00590(Arachidonic acid metabolism);ko01100(Metabolic pathways);ko00591(Linoleic acid metabolism)
PC-3p-127107_56	XM_016096779.2	963	986	977	-36.6	-28.32	0.77377	8.5	2-14,985-973;17-20,967-964	1-1,986-986[UP5];15-16,972-968[AILt];21-21,963-963[UP3]	.((((.....(((((((((((((.&.)))))))))))))---..)))).	AGUGGGAAUGCCAGGGCUCUUAGG&UCUAAGAGCCUUGG---AACCAUA	0	0	NA	NA	NA	0	0	NA	NA	NA	1	26.8255	4	0.426464	Output/S24h/cleaveLand_result/t_plot/PC-3p-127107_56_XM_016096779.2_977_TPlot.pdf	0	0	26.8255	2.2374e-12	2.55455e-12	yes	GO:0032555(purine ribonucleotide binding);GO:0005488(binding);GO:0017076(purine nucleotide binding);GO:0043168(anion binding);GO:0043167(ion binding);GO:0097367(carbohydrate derivative binding);GO:0005524(ATP binding);GO:0035639(purine ribonucleoside triphosphate binding);GO:0032559(adenyl ribonucleotide binding);GO:0036094(small molecule binding);GO:0030554(adenyl nucleotide binding);GO:0032553(…	ko04141(Protein processing in endoplasmic reticulum);ko04144(Endocytosis);ko03040(Spliceosome)
PC-3p-127107_56	XM_016097946.2	1253	1274	1264	-36.6	-24.2	0.661202	9	1-4,1274-1271;7-9,1268-1266;10-18,1264-1256	5-6,1270-1269[SIL];x-x,1265-1265[BULt];19-21,1255-1253[UP3]	...(((((((((.(((..((((&))))..)))-)))))))))...	GCAGGUUCCAAGUGCUAGUAGA&UCUAAGAGC-CUUGGAACCAUA	1	30.281	4	0.999962	Output/S0h/cleaveLand_result/t_plot/PC-3p-127107_56_XM_016097946.2_1264_TPlot.pdf	0	0	NA	NA	NA	0	0	NA	NA	NA	30.281	0	0	7.0631e-14	1.09903e-13	yes	GO:0009396(folic acid-containing compound biosynthetic process);GO:0044249(cellular biosynthetic process);GO:0046394(carboxylic acid biosynthetic process);GO:0019752(carboxylic acid metabolic process);GO:0018130(heterocycle biosynthetic process);GO:0006575(cellular modified amino acid metabolic process);GO:0051186(cofactor metabolic process);GO:0043603(cellular amide metabolic process);GO:0051188…	ko00790(Folate biosynthesis)
PC-3p-127107_56	XM_016100158.2	1823	1845	1834	-36.6	-29.4	0.803279	7	1-9,1845-1837;10-19,1834-1825	x-x,1836-1835[BULt];20-21,1824-1823[UP3]	..((((((((((..(((((((((&)))))))))--))))))))))..	CCUGGUUCCAAGAAGCUCUUGGA&UCUAAGAGC--CUUGGAACCAUA	0	0	NA	NA	NA	1	33.3045	4	0.138356	Output/S8h/cleaveLand_result/t_plot/PC-3p-127107_56_XM_016100158.2_1834_TPlot.pdf	0	0	NA	NA	NA	0	33.3045	0	3.4347e-15	7.86611e-15	yes	NA	NA
PC-3p-127107_56	XM_016102639.1	966	991	982	-36.6	-25.5	0.696721	14	1-11,991-981;12-17,976-971;18-19,969-968	x-x,980-977[BULt];x-x,970-970[BULt];20-21,967-966[UP3]	..((.((((((....(((((((((((&)))))))))))----))))))-))..	CUUGUGUUCCGGCGGGGGCUCUUGGA&UCUAAGAGCCU----UGGAAC-CAUA	0	0	NA	NA	NA	2	66.6089	3	0.293167	Output/S8h/cleaveLand_result/t_plot/PC-3p-127107_56_XM_016102639.1_982_TPlot.pdf	2	53.6509	3	0.347416	Output/S24h/cleaveLand_result/t_plot/PC-3p-127107_56_XM_016102639.1_982_TPlot.pdf	0	66.6089	53.6509	3.0735e-14	6.76143e-14	yes	NA	ko04016(MAPK signaling pathway - plant);ko04626(Plant-pathogen interaction)
PC-3p-127107_56	XM_016103236.2	670	690	681	-36.6	-24.4	0.666667	15	8-20,683-671	1-7,690-684[UP5];21-21,670-670[UP3]	.(((((((((((((.......&.......))))))))))))).	CAUGGUUCCGAGGCGGAUCCG&UCUAAGAGCCUUGGAACCAUA	1	30.281	4	0.999864	Output/S0h/cleaveLand_result/t_plot/PC-3p-127107_56_XM_016103236.2_681_TPlot.pdf	0	0	NA	NA	NA	0	0	NA	NA	NA	30.281	0	0	7.0631e-14	1.09903e-13	yes	NA	NA
PC-3p-127107_56	XM_016104137.2	545	566	556	-36.6	-24.3	0.663934	7	1-7,566-560;9-9,558-558;10-18,556-548	8-8,559-559[SIL];x-x,557-557[BULt];19-21,547-545[UP3]	...(((((((((.(.(((((((&))))))).)-)))))))))...	CAGGGUUCCAAGAGAUCUUAGA&UCUAAGAGC-CUUGGAACCAUA	18	545.058	3	0.618633	Output/S0h/cleaveLand_result/t_plot/PC-3p-127107_56_XM_016104137.2_556_TPlot.pdf	6	199.827	3	0.592622	Output/S8h/cleaveLand_result/t_plot/PC-3p-127107_56_XM_016104137.2_556_TPlot.pdf	5	134.127	3	0.66869	Output/S24h/cleaveLand_result/t_plot/PC-3p-127107_56_XM_016104137.2_556_TPlot.pdf	545.058	199.827	134.127	5.6788e-73	4.38214e-71	yes	GO:0050896(response to stimulus)	NA
PC-3p-127107_56	XM_016104195.2	386	408	397	-36.6	-27.4	0.748634	6	2-3,407-406;4-8,404-400;9-20,398-387	1-1,408-408[UP5];x-x,405-405[BULt];x-x,399-399[BULt];21-21,386-386[UP3]	.((((((((((((.(((((.((.&.))-)))))-)))))))))))).	GAUGGUUCCAAGGCCUCUUCAGC&UCU-AAGAG-CCUUGGAACCAUA	1	30.281	4	0.726619	Output/S0h/cleaveLand_result/t_plot/PC-3p-127107_56_XM_016104195.2_397_TPlot.pdf	0	0	NA	NA	NA	0	0	NA	NA	NA	30.281	0	0	7.0631e-14	1.09903e-13	yes	GO:0050896(response to stimulus)	NA
PC-3p-127107_56	XM_016105533.2	2006	2027	2017	-36.6	-24.3	0.663934	13	5-8,2023-2020;9-18,2018-2009	1-4,2027-2024[UP5];x-x,2019-2019[BULt];19-21,2008-2006[UP3]	...((((((((((.((((....&....))))-))))))))))...	UGGGGUUCCAGGGUCUCUGCAG&UCUAAGAG-CCUUGGAACCAUA	0	0	NA	NA	NA	2	66.6089	2	0.950564	Output/S8h/cleaveLand_result/t_plot/PC-3p-127107_56_XM_016105533.2_2017_TPlot.pdf	0	0	NA	NA	NA	0	66.6089	0	1.1789e-29	9.89421e-29	yes	GO:0043167(ion binding);GO:0097159(organic cyclic compound binding);GO:1901681(sulfur compound binding);GO:0046872(metal ion binding);GO:0016831(carboxy-lyase activity);GO:0016830(carbon-carbon lyase activity);GO:0043168(anion binding);GO:0000287(magnesium ion binding);GO:0019842(vitamin binding);GO:0050662(coenzyme binding);GO:0003824(catalytic activity);GO:0043169(cation binding);GO:0036094(sma…	ko01110(Biosynthesis of secondary metabolites);ko00010(Glycolysis / Gluconeogenesis);ko01100(Metabolic pathways)
PC-3p-127107_56	XM_016105830.2	1227	1250	1240	-36.6	-24.2	0.661202	10	2-6,1249-1245;7-11,1243-1239;12-18,1236-1230	1-1,1250-1250[UP5];x-x,1244-1244[BULt];x-x,1238-1237[BULt];19-21,1229-1227[UP3]	...(((((((..(((((.(((((.&.)))))-)))))--)))))))...	UGCGGUUCCAAAAGGCUACUUAGC&UCUAAG-AGCCU--UGGAACCAUA	0	0	NA	NA	NA	0	0	NA	NA	NA	1	26.8255	4	0.999992	Output/S24h/cleaveLand_result/t_plot/PC-3p-127107_56_XM_016105830.2_1240_TPlot.pdf	0	0	26.8255	2.2374e-12	2.55455e-12	yes	GO:0009719(response to endogenous stimulus);GO:0050896(response to stimulus);GO:0009725(response to hormone);GO:0009733(response to auxin);GO:0042221(response to chemical);GO:0010033(response to organic substance)	ko04075(Plant hormone signal transduction)
PC-3p-127107_56	XM_016107944.2	852	874	863	-36.6	-24	0.655738	8	1-2,874-873;4-9,871-866;10-20,863-853	3-3,872-872[SIL];x-x,865-864[BULt];21-21,852-852[UP3]	.(((((((((((..((((((.((&)).))))))--))))))))))).	CGUGGUUCUAAGUAGCUCUUUGA&UCUAAGAGC--CUUGGAACCAUA	1	30.281	4	0.999995	Output/S0h/cleaveLand_result/t_plot/PC-3p-127107_56_XM_016107944.2_863_TPlot.pdf	0	0	NA	NA	NA	0	0	NA	NA	NA	30.281	0	0	7.0631e-14	1.09903e-13	yes	GO:0003824(catalytic activity);GO:0016787(hydrolase activity)	NA
PC-3p-127107_56	XM_016109206.2	383	403	394	-36.6	-24.1	0.65847	14	7-18,397-386	1-6,403-398[UP5];19-21,385-383[UP3]	...((((((((((((......&......))))))))))))...	GGAGGUUCCAAGGCUGGGAAA&UCUAAGAGCCUUGGAACCAUA	0	0	NA	NA	NA	0	0	NA	NA	NA	1	26.8255	4	0.999998	Output/S24h/cleaveLand_result/t_plot/PC-3p-127107_56_XM_016109206.2_394_TPlot.pdf	0	0	26.8255	2.2374e-12	2.55455e-12	yes	GO:0016747(transferase activity, transferring acyl groups other than amino-acyl groups);GO:0016740(transferase activity);GO:0008152(metabolic process);GO:0003824(catalytic activity);GO:0009058(biosynthetic process);GO:0016746(transferase activity, transferring acyl groups)	ko01110(Biosynthesis of secondary metabolites);ko01100(Metabolic pathways);ko04712(Circadian rhythm - plant);ko00941(Flavonoid biosynthesis)
PC-3p-127107_56	XM_016111551.2	801	830	820	-36.6	-25.7	0.702186	22.5	1-4,830-827;6-11,824-819;12-21,810-801	5-5,826-825[AILt];x-x,818-811[BULt]	((((((((((........((((((..((((&))))-.))))))--------))))))))))	UGUGGUUCCAGAACCGCAGGGCUCGGUGGA&UCUA-AGAGCCU--------UGGAACCAUA	0	0	NA	NA	NA	2	66.6089	3	0.256166	Output/S8h/cleaveLand_result/t_plot/PC-3p-127107_56_XM_016111551.2_820_TPlot.pdf	0	0	NA	NA	NA	0	66.6089	0	1.1789e-29	9.89421e-29	yes	GO:0097159(organic cyclic compound binding);GO:0003676(nucleic acid binding);GO:1901363(heterocyclic compound binding);GO:0005488(binding);GO:0003677(DNA binding)	NA
PC-3p-127107_56	XM_016112192.2	474	494	485	-36.6	-25.1	0.685792	14	8-20,487-475	1-7,494-488[UP5];21-21,474-474[UP3]	.(((((((((((((.......&.......))))))))))))).	GAUGGUUCCAAGGCAACAGGU&UCUAAGAGCCUUGGAACCAUA	1	30.281	4	0.995224	Output/S0h/cleaveLand_result/t_plot/PC-3p-127107_56_XM_016112192.2_485_TPlot.pdf	1	33.3045	4	0.993807	Output/S8h/cleaveLand_result/t_plot/PC-3p-127107_56_XM_016112192.2_485_TPlot.pdf	0	0	NA	NA	NA	30.281	33.3045	0	1.1203e-07	1.21623e-07	yes	GO:0016051(carbohydrate biosynthetic process);GO:1901576(organic substance biosynthetic process);GO:0044042(glucan metabolic process);GO:0008152(metabolic process);GO:0044422(organelle part);GO:0043170(macromolecule metabolic process);GO:0016868(intramolecular transferase activity, phosphotransferases);GO:0005622(intracellular);GO:0009629(response to gravity);GO:0009590(detection of gravity);GO:0…	ko00500(Starch and sucrose metabolism);ko00230(Purine metabolism);ko00010(Glycolysis / Gluconeogenesis);ko01100(Metabolic pathways);ko01110(Biosynthesis of secondary metabolites);ko00030(Pentose phosphate pathway);ko00520(Amino sugar and nucleotide sugar metabolism);ko00052(Galactose metabolism)
PC-3p-127107_56	XM_016112487.2	808	828	820	-36.6	-23.9	0.653005	5.5	1-4,828-825;6-15,824-815;16-21,813-808	5-5,x-x[BULq];x-x,814-814[BULt]	((((((.((((((((((-((((&)))).))))))))))-))))))	UAUGGUGUUCAAGGUUC-UGGA&UCUAAGAGCCUUGGA-ACCAUA	0	0	NA	NA	NA	1	33.3045	4	0.999996	Output/S8h/cleaveLand_result/t_plot/PC-3p-127107_56_XM_016112487.2_820_TPlot.pdf	0	0	NA	NA	NA	0	33.3045	0	3.4347e-15	7.86611e-15	yes	GO:0043226(organelle);GO:1901360(organic cyclic compound metabolic process);GO:0043170(macromolecule metabolic process);GO:0036094(small molecule binding);GO:0097159(organic cyclic compound binding);GO:0005488(binding);GO:0050794(regulation of cellular process);GO:0016070(RNA metabolic process);GO:0044238(primary metabolic process);GO:1901363(heterocyclic compound binding);GO:0044260(cellular mac…	NA
PC-3p-127107_56	XM_016112488.2	808	828	820	-36.6	-23.9	0.653005	5.5	1-4,828-825;6-15,824-815;16-21,813-808	5-5,x-x[BULq];x-x,814-814[BULt]	((((((.((((((((((-((((&)))).))))))))))-))))))	UAUGGUGUUCAAGGUUC-UGGA&UCUAAGAGCCUUGGA-ACCAUA	1	30.281	4	0.999998	Output/S0h/cleaveLand_result/t_plot/PC-3p-127107_56_XM_016112488.2_820_TPlot.pdf	0	0	NA	NA	NA	0	0	NA	NA	NA	30.281	0	0	7.0631e-14	1.09903e-13	yes	GO:0043226(organelle);GO:1901360(organic cyclic compound metabolic process);GO:0043170(macromolecule metabolic process);GO:0036094(small molecule binding);GO:0097159(organic cyclic compound binding);GO:0005488(binding);GO:0050794(regulation of cellular process);GO:0016070(RNA metabolic process);GO:0044238(primary metabolic process);GO:1901363(heterocyclic compound binding);GO:0044260(cellular mac…	NA
PC-3p-127107_56	XM_016113026.2	1355	1376	1366	-36.6	-24.2	0.661202	7	1-8,1376-1369;9-16,1367-1360	x-x,1368-1368[BULt];17-21,1359-1355[UP3]	.....((((((((.((((((((&))))))))-)))))))).....	AGCUAUUCCAAGGACUCUUAGA&UCUAAGAG-CCUUGGAACCAUA	1	30.281	4	0.999976	Output/S0h/cleaveLand_result/t_plot/PC-3p-127107_56_XM_016113026.2_1366_TPlot.pdf	0	0	NA	NA	NA	0	0	NA	NA	NA	30.281	0	0	7.0631e-14	1.09903e-13	yes	GO:0016070(RNA metabolic process);GO:0009451(RNA modification);GO:0071704(organic substance metabolic process);GO:0005623(cell);GO:0003723(RNA binding);GO:0046483(heterocycle metabolic process);GO:0043231(intracellular membrane-bounded organelle);GO:0001522(pseudouridine synthesis);GO:0097159(organic cyclic compound binding);GO:0006139(nucleobase-containing compound metabolic process);GO:0043229(…	NA
PC-3p-127107_56	XM_016114373.2	1813	1837	1827	-36.6	-24	0.655738	10.5	2-5,1836-1833;7-15,1830-1822;16-21,1818-1813	1-1,1837-1837[UP5];6-6,1832-1831[AILt];x-x,1821-1819[BULt]	((((((...(((((((((..((((.&.))))-.)))))))))---))))))	UGUGGUUAAUCCAGGGCUGGUUGGG&UCUAA-GAGCCUUGGA---ACCAUA	0	0	NA	NA	NA	2	66.6089	2	0.981457	Output/S8h/cleaveLand_result/t_plot/PC-3p-127107_56_XM_016114373.2_1827_TPlot.pdf	0	0	NA	NA	NA	0	66.6089	0	1.1789e-29	9.89421e-29	yes	NA	ko03015(mRNA surveillance pathway)
PC-3p-127107_56	XM_016114429.2	175	196	187	-36.6	-24.3	0.663934	8	1-3,196-194;6-9,192-189;10-10,187-187;11-21,185-175	4-5,193-193[AILq];x-x,188-188[BULt];x-x,186-186[BULt]	(((((((((((.(.((((.-(((&)))..))))-)-)))))))))))	UAUGGUUCCAACGAGCUCG-AGA&UCUAAGAGC-C-UUGGAACCAUA	1	30.281	4	0.999948	Output/S0h/cleaveLand_result/t_plot/PC-3p-127107_56_XM_016114429.2_187_TPlot.pdf	0	0	NA	NA	NA	0	0	NA	NA	NA	30.281	0	0	7.0631e-14	1.09903e-13	yes	GO:0005524(ATP binding);GO:0032553(ribonucleotide binding);GO:0043167(ion binding);GO:1901265(nucleoside phosphate binding);GO:0000166(nucleotide binding);GO:0043169(cation binding);GO:0003824(catalytic activity);GO:0043168(anion binding);GO:0016787(hydrolase activity);GO:0016020(membrane);GO:0035639(purine ribonucleoside triphosphate binding);GO:0032559(adenyl ribonucleotide binding);GO:0031224(…	NA
PC-3p-127107_56	XM_016116574.2	559	586	577	-36.6	-23.8	0.650273	10.5	1-4,586-583;6-14,581-573;15-21,565-559	5-5,582-582[SIL];x-x,572-566[BULt]	(((((((.......(((((((((.((((&)))).)))))))))-------)))))))	UGUGGUUUUGGAAGCCAAGGUUCAUAGA&UCUAAGAGCCUUGG-------AACCAUA	0	0	NA	NA	NA	0	0	NA	NA	NA	3	80.4764	2	0.996342	Output/S24h/cleaveLand_result/t_plot/PC-3p-127107_56_XM_016116574.2_577_TPlot.pdf	0	0	80.4764	1.1184e-35	1.47636e-34	yes	GO:1901071(glucosamine-containing compound metabolic process);GO:0006022(aminoglycan metabolic process);GO:0009057(macromolecule catabolic process);GO:0003824(catalytic activity);GO:0008152(metabolic process);GO:1901136(carbohydrate derivative catabolic process);GO:0006026(aminoglycan catabolic process);GO:0006030(chitin metabolic process);GO:0016798(hydrolase activity, acting on glycosyl bonds);…	ko01100(Metabolic pathways);ko00520(Amino sugar and nucleotide sugar metabolism)
PC-3p-127107_56	XM_016116888.2	2437	2460	2448	-36.6	-26.3	0.718579	11	1-3,2460-2458;4-6,2453-2451;8-20,2450-2438	x-x,2457-2454[BULt];7-7,x-x[BULq];21-21,2437-2437[UP3]	.(((((((((((((-(((....(((&)))----))).))))))))))))).	GAUGGUUCCAAGGC-CUUCCCAAGA&UCU----AAGAGCCUUGGAACCAUA	2	60.562	2	0.546641	Output/S0h/cleaveLand_result/t_plot/PC-3p-127107_56_XM_016116888.2_2448_TPlot.pdf	1	33.3045	4	0.888212	Output/S8h/cleaveLand_result/t_plot/PC-3p-127107_56_XM_016116888.2_2448_TPlot.pdf	2	53.6509	2	0.595215	Output/S24h/cleaveLand_result/t_plot/PC-3p-127107_56_XM_016116888.2_2448_TPlot.pdf	60.562	33.3045	53.6509	0.016848	0.0170154	yes	NA	NA
PC-3p-127107_56	XM_021125442.1	590	612	602	-36.6	-24.6	0.672131	8	1-2,612-611;3-16,609-596;17-18,594-593	x-x,610-610[BULt];x-x,595-595[BULt];19-21,592-590[UP3]	...((.((((((((((((((.((&))-))))))))))))))-))...	UAAGGUUUCCAAGGUUCUUGUGA&UC-UAAGAGCCUUGGAA-CCAUA	1	30.281	4	0.999478	Output/S0h/cleaveLand_result/t_plot/PC-3p-127107_56_XM_021125442.1_602_TPlot.pdf	0	0	NA	NA	NA	0	0	NA	NA	NA	30.281	0	0	7.0631e-14	1.09903e-13	yes	GO:0006351(transcription, DNA-templated);GO:0071704(organic substance metabolic process);GO:0009058(biosynthetic process);GO:0043226(organelle);GO:0034654(nucleobase-containing compound biosynthetic process);GO:0032774(RNA biosynthetic process);GO:0003700(DNA binding transcription factor activity);GO:0043229(intracellular organelle);GO:0006725(cellular aromatic compound metabolic process);GO:0009…	ko04626(Plant-pathogen interaction);ko04016(MAPK signaling pathway - plant)
PC-3p-127107_56	XM_021139693.1	1856	1876	1867	-36.6	-26	0.710383	8.5	1-3,1876-1874;6-15,1871-1862;17-20,1860-1857	4-5,1873-1872[SIL];16-16,1861-1861[SIL];21-21,1856-1856[UP3]	.((((.((((((((((..(((&)))..)))))))))).)))).	AGUGGAUCCAAGGCUUGGGGA&UCUAAGAGCCUUGGAACCAUA	0	0	NA	NA	NA	1	33.3045	4	0.915221	Output/S8h/cleaveLand_result/t_plot/PC-3p-127107_56_XM_021139693.1_1867_TPlot.pdf	0	0	NA	NA	NA	0	33.3045	0	3.4347e-15	7.86611e-15	yes	GO:0006464(cellular protein modification process);GO:0016740(transferase activity);GO:0035639(purine ribonucleoside triphosphate binding);GO:1901564(organonitrogen compound metabolic process);GO:0043412(macromolecule modification);GO:0016020(membrane);GO:0032553(ribonucleotide binding);GO:1901363(heterocyclic compound binding);GO:0008152(metabolic process);GO:0016773(phosphotransferase activity, …	ko04626(Plant-pathogen interaction)
PC-3p-127107_56	XM_021140420.1	689	712	701	-36.6	-24.98	0.682514	12	1-4,712-709;7-10,704-701;11-20,699-690	5-6,708-705[AILt];x-x,700-700[BULt];21-21,689-689[UP3]	.((((((((((.((((....((((&))))--..))))-)))))))))).	GAUGGUUCCAAGGGCUGAGGUGGA&UCUA--AGAGCC-UUGGAACCAUA	0	0	NA	NA	NA	0	0	NA	NA	NA	4	107.302	2	0.89621	Output/S24h/cleaveLand_result/t_plot/PC-3p-127107_56_XM_021140420.1_701_TPlot.pdf	0	0	107.302	2.4987e-47	7.37574e-46	yes	NA	NA
PC-3p-127107_56	XM_021141676.1	1167	1188	1179	-36.6	-25.8	0.704918	10	1-10,1188-1179;13-19,1175-1169	11-12,1178-1176[AILt];20-21,1168-1167[UP3]	..(((((((...((((((((((&))))))))))-..)))))))..	AUUGGUUCCUCUGGUUCUUGGA&UCUAAGAGCC-UUGGAACCAUA	0	0	NA	NA	NA	0	0	NA	NA	NA	1	26.8255	4	0.95858	Output/S24h/cleaveLand_result/t_plot/PC-3p-127107_56_XM_021141676.1_1179_TPlot.pdf	0	0	26.8255	2.2374e-12	2.55455e-12	yes	GO:0070011(peptidase activity, acting on L-amino acid peptides);GO:0009987(cellular process);GO:0005737(cytoplasm);GO:0015833(peptide transport);GO:0033036(macromolecule localization);GO:0016787(hydrolase activity);GO:0008152(metabolic process);GO:0019538(protein metabolic process);GO:0061919(process utilizing autophagic mechanism);GO:0008233(peptidase activity);GO:0071705(nitrogen compound trans…	ko04136(Autophagy - other)
PC-3p-127107_56	XM_021141881.1	1540	1564	1554	-36.6	-23.9	0.653005	7.5	1-3,1564-1562;4-14,1560-1550;15-20,1546-1541	x-x,1561-1561[BULt];x-x,1549-1547[BULt];21-21,1540-1540[UP3]	.((((((...(((((((((((.(((&)))-)))))))))))---)))))).	GAUGGUUUUGCUGAGGCUCUUGAGA&UCU-AAGAGCCUUGG---AACCAUA	0	0	NA	NA	NA	0	0	NA	NA	NA	1	26.8255	4	1	Output/S24h/cleaveLand_result/t_plot/PC-3p-127107_56_XM_021141881.1_1554_TPlot.pdf	0	0	26.8255	2.2374e-12	2.55455e-12	yes	GO:0030312(external encapsulating structure);GO:0046556(alpha-L-arabinofuranosidase activity);GO:0044424(intracellular part);GO:0071704(organic substance metabolic process);GO:0016020(membrane);GO:0043226(organelle);GO:0016787(hydrolase activity);GO:0016052(carbohydrate catabolic process);GO:0003824(catalytic activity);GO:0044238(primary metabolic process);GO:0000272(polysaccharide catabolic proc…	ko01100(Metabolic pathways);ko00520(Amino sugar and nucleotide sugar metabolism)
PC-3p-127107_56	XM_021143610.1	731	751	743	-36.6	-23.9	0.653005	5.5	1-4,751-748;6-15,747-738;16-21,736-731	5-5,x-x[BULq];x-x,737-737[BULt]	((((((.((((((((((-((((&)))).))))))))))-))))))	UAUGGUGUUCAAGGUUC-UGGA&UCUAAGAGCCUUGGA-ACCAUA	0	0	NA	NA	NA	0	0	NA	NA	NA	1	26.8255	4	1	Output/S24h/cleaveLand_result/t_plot/PC-3p-127107_56_XM_021143610.1_743_TPlot.pdf	0	0	26.8255	2.2374e-12	2.55455e-12	yes	GO:0043226(organelle);GO:1901360(organic cyclic compound metabolic process);GO:0043170(macromolecule metabolic process);GO:0036094(small molecule binding);GO:0097159(organic cyclic compound binding);GO:0005488(binding);GO:0050794(regulation of cellular process);GO:0016070(RNA metabolic process);GO:0044238(primary metabolic process);GO:1901363(heterocyclic compound binding);GO:0044260(cellular mac…	NA
PC-3p-12725_949	BGI_novel_T000598	585	611	597	-39.4	-25.7	0.652284	16	3-7,609-605;8-19,599-588;20-21,586-585	1-2,611-610[UP5];x-x,604-600[BULt];x-x,587-587[BULt]	((.((((((((((((.....(((((..&..)))))-----))))))))))))-))	GACGAGAUCAAGUUGGUCUAGCGGGUC&UUCCCGU-----CGACUUGAUCUC-UC	1	30.281	4	0.999948	Output/S0h/cleaveLand_result/t_plot/PC-3p-12725_949_BGI_novel_T000598_597_TPlot.pdf	0	0	NA	NA	NA	0	0	NA	NA	NA	30.281	0	0	7.0631e-14	1.09903e-13	yes	GO:1901363(heterocyclic compound binding);GO:0005488(binding);GO:0097159(organic cyclic compound binding);GO:0003677(DNA binding);GO:0003676(nucleic acid binding)	ko04144(Endocytosis)
PC-3p-12725_949	BGI_novel_T000599	484	510	496	-39.4	-25.7	0.652284	16	3-7,508-504;8-19,498-487;20-21,485-484	1-2,510-509[UP5];x-x,503-499[BULt];x-x,486-486[BULt]	((.((((((((((((.....(((((..&..)))))-----))))))))))))-))	GACGAGAUCAAGUUGGUCUAGCGGGUC&UUCCCGU-----CGACUUGAUCUC-UC	1	30.281	4	0.999958	Output/S0h/cleaveLand_result/t_plot/PC-3p-12725_949_BGI_novel_T000599_496_TPlot.pdf	0	0	NA	NA	NA	0	0	NA	NA	NA	30.281	0	0	7.0631e-14	1.09903e-13	yes	GO:1901363(heterocyclic compound binding);GO:0005488(binding);GO:0097159(organic cyclic compound binding);GO:0003677(DNA binding);GO:0003676(nucleic acid binding)	ko04144(Endocytosis)
PC-3p-12725_949	BGI_novel_T003024	1029	1050	1042	-39.4	-29.3	0.743655	6	1-9,1050-1042;11-18,1041-1034;19-21,1031-1029	10-10,x-x[BULq];x-x,1033-1032[BULt]	(((..((((((((-(((((((((&))))))))).))))))))--)))	GAGGUGGAUCAAG-CGGCGGGAG&UUCCCGUCGACUUGAUCU--CUC	0	0	NA	NA	NA	0	0	NA	NA	NA	1	26.8255	4	0.315486	Output/S24h/cleaveLand_result/t_plot/PC-3p-12725_949_BGI_novel_T003024_1042_TPlot.pdf	0	0	26.8255	2.2374e-12	2.55455e-12	yes	GO:0097159(organic cyclic compound binding);GO:0003676(nucleic acid binding);GO:0003723(RNA binding);GO:0005488(binding);GO:0036094(small molecule binding);GO:1901363(heterocyclic compound binding);GO:0000166(nucleotide binding);GO:1901265(nucleoside phosphate binding)	ko03040(Spliceosome)
PC-3p-12725_949	BGI_novel_T004344	908	932	923	-39.4	-25.8	0.654822	10.5	2-5,931-928;7-12,926-921;13-18,918-913;19-21,910-908	1-1,932-932[UP5];6-6,927-927[SIL];x-x,920-919[BULt];x-x,912-911[BULt]	(((..((((((..((((((.((((.&.)))).))))))--))))))--)))	GAGCAAGAUCGCUGGUCGAGGGGAC&UUCCCGUCGACU--UGAUCU--CUC	0	0	NA	NA	NA	0	0	NA	NA	NA	1	26.8255	4	0.999977	Output/S24h/cleaveLand_result/t_plot/PC-3p-12725_949_BGI_novel_T004344_923_TPlot.pdf	0	0	26.8255	2.2374e-12	2.55455e-12	yes	GO:0008135(translation factor activity, RNA binding);GO:0097159(organic cyclic compound binding);GO:0003723(RNA binding);GO:1901363(heterocyclic compound binding);GO:0003676(nucleic acid binding);GO:0003743(translation initiation factor activity);GO:0005488(binding)	ko04144(Endocytosis)
PC-3p-12725_949	BGI_novel_T006646	1059	1082	1071	-39.4	-25.7	0.652284	10.5	2-6,1081-1077;7-14,1074-1067;15-21,1065-1059	1-1,1082-1082[UP5];x-x,1076-1075[BULt];x-x,1066-1066[BULt]	(((((((.((((((((..(((((.&.)))))--))))))))-)))))))	GAGAGGUGCAGGUUGAAAUGGGGG&UUCCCG--UCGACUUG-AUCUCUC	0	0	NA	NA	NA	1	33.3045	4	0.999955	Output/S8h/cleaveLand_result/t_plot/PC-3p-12725_949_BGI_novel_T006646_1071_TPlot.pdf	0	0	NA	NA	NA	0	33.3045	0	3.4347e-15	7.86611e-15	yes	GO:0003677(DNA binding);GO:0097159(organic cyclic compound binding);GO:0005488(binding);GO:0003676(nucleic acid binding);GO:0046983(protein dimerization activity);GO:1901363(heterocyclic compound binding);GO:0005515(protein binding)	ko01100(Metabolic pathways);ko00510(N-Glycan biosynthesis);ko02010(ABC transporters);ko03050(Proteasome);ko04141(Protein processing in endoplasmic reticulum)
PC-3p-12725_949	BGI_novel_T006926	2381	2400	2392	-39.4	-30.5	0.774112	5.5	1-9,2400-2392;11-12,2391-2390;14-21,2388-2381	10-10,x-x[BULq];13-13,2389-2389[SIL]	((((((((.((-(((((((((&))))))))).)).))))))))	GAGGGAUCCGG-CGACGGGGA&UUCCCGUCGACUUGAUCUCUC	0	0	NA	NA	NA	0	0	NA	NA	NA	1	26.8255	4	0.0730071	Output/S24h/cleaveLand_result/t_plot/PC-3p-12725_949_BGI_novel_T006926_2392_TPlot.pdf	0	0	26.8255	2.2374e-12	2.55455e-12	yes	GO:0097159(organic cyclic compound binding);GO:0003676(nucleic acid binding);GO:1901363(heterocyclic compound binding);GO:0005488(binding)	ko02010(ABC transporters)
PC-3p-12725_949	BGI_novel_T011979	1148	1169	1159	-39.4	-26.1	0.662437	8	1-4,1169-1166;6-8,1163-1161;11-21,1158-1148	5-5,1165-1164[AILt];9-10,1160-1159[SIL]	(((((((((((..(((..((((&))))-.)))..)))))))))))	GAGAGAUCAAGAAGACUUGGAA&UUCC-CGUCGACUUGAUCUCUC	0	0	NA	NA	NA	0	0	NA	NA	NA	1	26.8255	4	0.999832	Output/S24h/cleaveLand_result/t_plot/PC-3p-12725_949_BGI_novel_T011979_1159_TPlot.pdf	0	0	26.8255	2.2374e-12	2.55455e-12	yes	NA	ko00052(Galactose metabolism)
PC-3p-12725_949	XM_016078066.2	984	1004	995	-39.4	-26.2	0.664975	8	2-4,1003-1001;5-8,999-996;10-21,995-984	1-1,1004-1004[UP5];x-x,1000-1000[BULt];9-9,x-x[BULq]	((((((((((((-((((.(((.&.)))-)))).))))))))))))	GAGGGGUCAGGU-GAUGAGGAC&UUCC-CGUCGACUUGAUCUCUC	0	0	NA	NA	NA	2	66.6089	3	0.474233	Output/S8h/cleaveLand_result/t_plot/PC-3p-12725_949_XM_016078066.2_995_TPlot.pdf	1	26.8255	4	0.999651	Output/S24h/cleaveLand_result/t_plot/PC-3p-12725_949_XM_016078066.2_995_TPlot.pdf	0	66.6089	26.8255	2.1751e-16	8.57352e-16	yes	GO:0043168(anion binding);GO:0046872(metal ion binding);GO:0044434(chloroplast part);GO:0097367(carbohydrate derivative binding);GO:0009408(response to heat);GO:0043227(membrane-bounded organelle);GO:0009628(response to abiotic stimulus);GO:0031975(envelope);GO:0005488(binding);GO:0017076(purine nucleotide binding);GO:0005515(protein binding);GO:0031072(heat shock protein binding);GO:0005524(ATP …	NA
PC-3p-12725_949	XM_016078894.2	1119	1140	1131	-39.4	-27	0.685279	10.5	4-11,1137-1130;13-21,1127-1119	1-3,1140-1138[UP5];12-12,1129-1128[AILt]	(((((((((..((((((((...&...))))))))-.)))))))))	GGGAGGUCGCCGUCGACGGUGC&UUCCCGUCGAC-UUGAUCUCUC	0	0	NA	NA	NA	1	33.3045	4	0.971351	Output/S8h/cleaveLand_result/t_plot/PC-3p-12725_949_XM_016078894.2_1131_TPlot.pdf	0	0	NA	NA	NA	0	33.3045	0	3.4347e-15	7.86611e-15	yes	NA	ko00940(Phenylpropanoid biosynthesis);ko00500(Starch and sucrose metabolism);ko01110(Biosynthesis of secondary metabolites);ko01100(Metabolic pathways);ko00460(Cyanoamino acid metabolism)
PC-3p-12725_949	XM_016080561.2	1790	1808	1799	-39.4	-26.5	0.672589	5	1-12,1808-1797;15-20,1796-1791	13-14,x-x[BULq];21-21,1790-1790[UP3]	.((((((--((((((((((((&))))))))))))..)))))).	UAGAGAU--GGUCGAUGGGAA&UUCCCGUCGACUUGAUCUCUC	0	0	NA	NA	NA	1	33.3045	4	0.996513	Output/S8h/cleaveLand_result/t_plot/PC-3p-12725_949_XM_016080561.2_1799_TPlot.pdf	0	0	NA	NA	NA	0	33.3045	0	3.4347e-15	7.86611e-15	yes	GO:0043170(macromolecule metabolic process);GO:0010033(response to organic substance);GO:0071367(cellular response to brassinosteroid stimulus);GO:0009741(response to brassinosteroid);GO:0016311(dephosphorylation);GO:0071407(cellular response to organic cyclic compound);GO:1901564(organonitrogen compound metabolic process);GO:0006807(nitrogen compound metabolic process);GO:0043412(macromolecule m…	NA
PC-3p-12725_949	XM_016087288.2	588	607	598	-39.4	-27	0.685279	7.5	1-5,607-603;7-8,601-600;11-14,597-594;16-21,593-588	6-6,602-602[SIL];9-10,599-598[SIL];15-15,x-x[BULq]	((((((-((((..((.(((((&))))).))..)))).))))))	GAGAGA-CAAGGAGAGGGGAG&UUCCCGUCGACUUGAUCUCUC	0	0	NA	NA	NA	0	0	NA	NA	NA	1	26.8255	4	0.983323	Output/S24h/cleaveLand_result/t_plot/PC-3p-12725_949_XM_016087288.2_598_TPlot.pdf	0	0	26.8255	2.2374e-12	2.55455e-12	yes	NA	ko01200(Carbon metabolism);ko00010(Glycolysis / Gluconeogenesis);ko01100(Metabolic pathways);ko00030(Pentose phosphate pathway)
PC-3p-12725_949	XM_016089688.2	2166	2188	2178	-39.4	-27.2	0.690355	7	1-7,2188-2182;8-10,2180-2178;11-13,2176-2174;16-21,2171-2166	x-x,2181-2181[BULt];x-x,2177-2177[BULt];14-15,2173-2172[SIL]	((((((..(((.(((.(((((((&)))))))-)))-)))..))))))	GGGAGAGAGAGCUCGAACGGGAA&UUCCCGU-CGA-CUUGAUCUCUC	0	0	NA	NA	NA	0	0	NA	NA	NA	1	26.8255	4	0.95752	Output/S24h/cleaveLand_result/t_plot/PC-3p-12725_949_XM_016089688.2_2178_TPlot.pdf	0	0	26.8255	2.2374e-12	2.55455e-12	yes	GO:0005488(binding);GO:0097159(organic cyclic compound binding);GO:0043168(anion binding);GO:1901265(nucleoside phosphate binding);GO:0017111(nucleoside-triphosphatase activity);GO:0016787(hydrolase activity);GO:0016462(pyrophosphatase activity);GO:0030554(adenyl nucleotide binding);GO:1901363(heterocyclic compound binding);GO:0003824(catalytic activity);GO:0035639(purine ribonucleoside triphosph…	NA
PC-3p-12725_949	XM_016090820.2	628	657	648	-39.4	-27.2	0.690355	22.5	1-5,657-653;7-12,651-646;13-21,636-628	6-6,652-652[SIL];x-x,645-637[BULt]	(((((((((.........((((((.(((((&))))).))))))---------)))))))))	GGGAGAUCACACCAUCAUGGUCGGAGGGAA&UUCCCGUCGACU---------UGAUCUCUC	0	0	NA	NA	NA	0	0	NA	NA	NA	1	26.8255	4	0.937941	Output/S24h/cleaveLand_result/t_plot/PC-3p-12725_949_XM_016090820.2_648_TPlot.pdf	0	0	26.8255	2.2374e-12	2.55455e-12	yes	GO:0003824(catalytic activity);GO:0044260(cellular macromolecule metabolic process);GO:0043169(cation binding);GO:0043170(macromolecule metabolic process);GO:0009056(catabolic process);GO:0032446(protein modification by small protein conjugation);GO:0008152(metabolic process);GO:0036211(protein modification process);GO:0071704(organic substance metabolic process);GO:0051603(proteolysis involved i…	NA
PC-3p-12725_949	XM_016092592.2	1066	1087	1078	-39.4	-26	0.659898	9.5	2-11,1086-1077;14-19,1073-1068	1-1,1087-1087[UP5];12-13,1076-1074[AILt];20-21,1067-1066[UP3]	..((((((...((((((((((.&.))))))))))-..))))))..	CCGGGAUCCAUGUCGAUGGGAU&UUCCCGUCGAC-UUGAUCUCUC	0	0	NA	NA	NA	2	66.6089	2	0.936254	Output/S8h/cleaveLand_result/t_plot/PC-3p-12725_949_XM_016092592.2_1078_TPlot.pdf	0	0	NA	NA	NA	0	66.6089	0	1.1789e-29	9.89421e-29	yes	GO:0032787(monocarboxylic acid metabolic process);GO:0044422(organelle part);GO:0008152(metabolic process);GO:0006090(pyruvate metabolic process);GO:0009532(plastid stroma);GO:0043226(organelle);GO:0044237(cellular metabolic process);GO:0006732(coenzyme metabolic process);GO:0006082(organic acid metabolic process);GO:0009526(plastid envelope);GO:0055114(oxidation-reduction process);GO:0035384(thi…	ko00010(Glycolysis / Gluconeogenesis);ko01110(Biosynthesis of secondary metabolites);ko00620(Pyruvate metabolism);ko00020(Citrate cycle (TCA cycle));ko01100(Metabolic pathways);ko01200(Carbon metabolism)
PC-3p-12725_949	XM_016093893.2	1133	1155	1145	-39.4	-27.1	0.687817	7.5	2-6,1154-1150;8-8,1148-1148;9-12,1146-1143;13-21,1141-1133	1-1,1155-1155[UP5];7-7,1149-1149[SIL];x-x,1147-1147[BULt];x-x,1142-1142[BULt]	(((((((((.((((.(.(((((.&.))))).)-))))-)))))))))	GAGAGGUCAGAGUCUGCCGGGAG&UUCCCGUC-GACU-UGAUCUCUC	1	30.281	4	0.945351	Output/S0h/cleaveLand_result/t_plot/PC-3p-12725_949_XM_016093893.2_1145_TPlot.pdf	0	0	NA	NA	NA	0	0	NA	NA	NA	30.281	0	0	7.0631e-14	1.09903e-13	yes	GO:0043170(macromolecule metabolic process);GO:0003824(catalytic activity);GO:0035639(purine ribonucleoside triphosphate binding);GO:0006464(cellular protein modification process);GO:0043167(ion binding);GO:0065007(biological regulation);GO:0036094(small molecule binding);GO:0004672(protein kinase activity);GO:0023052(signaling);GO:0051716(cellular response to stimulus);GO:0005524(ATP binding);GO…	NA
PC-3p-12725_949	XM_016094772.2	692	711	703	-39.4	-28.3	0.718274	6	3-8,709-704;10-20,703-693	1-2,711-710[UP5];9-9,x-x[BULq];21-21,692-692[UP3]	.(((((((((((-((((((..&..)))))).))))))))))).	AAGAGAUCAAGU-GACGGGCA&UUCCCGUCGACUUGAUCUCUC	1	30.281	4	0.488703	Output/S0h/cleaveLand_result/t_plot/PC-3p-12725_949_XM_016094772.2_703_TPlot.pdf	0	0	NA	NA	NA	0	0	NA	NA	NA	30.281	0	0	7.0631e-14	1.09903e-13	yes	GO:0031326(regulation of cellular biosynthetic process);GO:0031323(regulation of cellular metabolic process);GO:0051252(regulation of RNA metabolic process);GO:0043169(cation binding);GO:1903506(regulation of nucleic acid-templated transcription);GO:0006355(regulation of transcription, DNA-templated);GO:0050789(regulation of biological process);GO:0043167(ion binding);GO:0010468(regulation of gen…	NA
PC-3p-12725_949	XM_016096771.2	1252	1273	1264	-39.4	-27.9	0.708122	6	1-13,1273-1261;15-17,1259-1257;18-21,1255-1252	14-14,1260-1260[SIL];x-x,1256-1256[BULt]	((((.(((.(((((((((((((&))))))))))))).)))-))))	GGGAUGAUGGGGUUGAUGGGAA&UUCCCGUCGACUUGAUC-UCUC	1	30.281	4	0.694281	Output/S0h/cleaveLand_result/t_plot/PC-3p-12725_949_XM_016096771.2_1264_TPlot.pdf	2	66.6089	2	0.319525	Output/S8h/cleaveLand_result/t_plot/PC-3p-12725_949_XM_016096771.2_1264_TPlot.pdf	1	26.8255	4	0.737971	Output/S24h/cleaveLand_result/t_plot/PC-3p-12725_949_XM_016096771.2_1264_TPlot.pdf	30.281	66.6089	26.8255	7.6633e-06	7.87399e-06	yes	GO:0044260(cellular macromolecule metabolic process);GO:0006470(protein dephosphorylation);GO:1901564(organonitrogen compound metabolic process);GO:0006807(nitrogen compound metabolic process);GO:0008152(metabolic process);GO:0006796(phosphate-containing compound metabolic process);GO:0016787(hydrolase activity);GO:0009987(cellular process);GO:0044237(cellular metabolic process);GO:0044238(primar…	NA
PC-3p-12725_949	XM_016097625.2	1028	1049	1041	-39.4	-29.3	0.743655	6	1-9,1049-1041;11-18,1040-1033;19-21,1030-1028	10-10,x-x[BULq];x-x,1032-1031[BULt]	(((..((((((((-(((((((((&))))))))).))))))))--)))	GAGGUGGAUCAAG-CGGCGGGAG&UUCCCGUCGACUUGAUCU--CUC	1	30.281	4	0.300761	Output/S0h/cleaveLand_result/t_plot/PC-3p-12725_949_XM_016097625.2_1041_TPlot.pdf	0	0	NA	NA	NA	0	0	NA	NA	NA	30.281	0	0	7.0631e-14	1.09903e-13	yes	GO:0097159(organic cyclic compound binding);GO:0003676(nucleic acid binding);GO:0003723(RNA binding);GO:0005488(binding);GO:0036094(small molecule binding);GO:1901363(heterocyclic compound binding);GO:0000166(nucleotide binding);GO:1901265(nucleoside phosphate binding)	ko03040(Spliceosome)
PC-3p-12725_949	XM_016097651.2	301	321	312	-39.4	-26.7	0.677665	8.5	2-8,320-314;11-20,311-302	1-1,321-321[UP5];9-10,313-312[SIL];21-21,301-301[UP3]	.((((((((((..(((((((.&.)))))))..)))))))))).	UGGGGGUCAAGAAGAUGGGAU&UUCCCGUCGACUUGAUCUCUC	1	30.281	4	0.993169	Output/S0h/cleaveLand_result/t_plot/PC-3p-12725_949_XM_016097651.2_312_TPlot.pdf	0	0	NA	NA	NA	0	0	NA	NA	NA	30.281	0	0	7.0631e-14	1.09903e-13	yes	GO:0003824(catalytic activity);GO:0042578(phosphoric ester hydrolase activity);GO:0016788(hydrolase activity, acting on ester bonds);GO:0016787(hydrolase activity)	ko03440(Homologous recombination);ko04712(Circadian rhythm - plant);ko03010(Ribosome)
PC-3p-12725_949	XM_016098671.2	134	158	149	-39.4	-27.3	0.692893	9	1-5,158-154;7-11,152-148;12-15,145-142;16-21,139-134	6-6,153-153[SIL];x-x,147-146[BULt];x-x,141-140[BULt]	((((((..((((..(((((.(((((&))))).)))))--))))--))))))	GAGAGAAAUCAGAUGUCGAGGGGAA&UUCCCGUCGAC--UUGA--UCUCUC	2	60.562	2	0.563721	Output/S0h/cleaveLand_result/t_plot/PC-3p-12725_949_XM_016098671.2_149_TPlot.pdf	0	0	NA	NA	NA	1	26.8255	4	0.934724	Output/S24h/cleaveLand_result/t_plot/PC-3p-12725_949_XM_016098671.2_149_TPlot.pdf	60.562	0	26.8255	1.8594e-14	4.12939e-14	yes	GO:0016021(integral component of membrane);GO:0031224(intrinsic component of membrane);GO:0044425(membrane part);GO:0016020(membrane)	NA
PC-3p-12725_949	XM_016100475.2	589	610	601	-39.4	-27.6	0.700508	7.5	1-8,610-603;10-12,601-599;13-20,597-590	9-9,602-602[SIL];x-x,598-598[BULt];21-21,589-589[UP3]	.((((((((.(((.((((((((&)))))))).)))-)))))))).	UAGAGGUCACAGUGGAUGGGGA&UUCCCGUCGACU-UGAUCUCUC	4	121.124	2	0.495177	Output/S0h/cleaveLand_result/t_plot/PC-3p-12725_949_XM_016100475.2_601_TPlot.pdf	0	0	NA	NA	NA	0	0	NA	NA	NA	121.124	0	0	2.4796e-53	9.49387e-52	yes	GO:0044042(glucan metabolic process);GO:0008270(zinc ion binding);GO:0016740(transferase activity);GO:0033692(cellular polysaccharide biosynthetic process);GO:0071554(cell wall organization or biogenesis);GO:0043170(macromolecule metabolic process);GO:0000271(polysaccharide biosynthetic process);GO:0046914(transition metal ion binding);GO:0044464(cell part);GO:0031224(intrinsic component of membr…	NA
PC-3p-12725_949	XM_016100476.1	137	158	149	-39.4	-27.6	0.700508	7.5	1-8,158-151;10-12,149-147;13-20,145-138	9-9,150-150[SIL];x-x,146-146[BULt];21-21,137-137[UP3]	.((((((((.(((.((((((((&)))))))).)))-)))))))).	UAGAGGUCACAGUGGAUGGGGA&UUCCCGUCGACU-UGAUCUCUC	1	30.281	4	0.866334	Output/S0h/cleaveLand_result/t_plot/PC-3p-12725_949_XM_016100476.1_149_TPlot.pdf	0	0	NA	NA	NA	0	0	NA	NA	NA	30.281	0	0	7.0631e-14	1.09903e-13	yes	GO:0044042(glucan metabolic process);GO:0008270(zinc ion binding);GO:0016740(transferase activity);GO:0033692(cellular polysaccharide biosynthetic process);GO:0071554(cell wall organization or biogenesis);GO:0043170(macromolecule metabolic process);GO:0000271(polysaccharide biosynthetic process);GO:0046914(transition metal ion binding);GO:0044464(cell part);GO:0031224(intrinsic component of membr…	NA
PC-3p-12725_949	XM_016102010.2	667	688	679	-39.4	-27.9	0.708122	6.5	1-10,688-679;11-11,677-677;13-19,675-669	x-x,678-678[BULt];12-12,676-676[SIL];20-21,668-667[UP3]	..(((((((.(.((((((((((&))))))))))-).)))))))..	UCGGGAUCACGUUCGACGGGAA&UUCCCGUCGA-CUUGAUCUCUC	0	0	NA	NA	NA	0	0	NA	NA	NA	3	80.4764	3	0.137681	Output/S24h/cleaveLand_result/t_plot/PC-3p-12725_949_XM_016102010.2_679_TPlot.pdf	0	0	80.4764	1.1184e-35	1.47636e-34	yes	NA	ko00500(Starch and sucrose metabolism);ko00940(Phenylpropanoid biosynthesis);ko00460(Cyanoamino acid metabolism);ko01100(Metabolic pathways);ko01110(Biosynthesis of secondary metabolites);ko04626(Plant-pathogen interaction);ko04016(MAPK signaling pathway - plant)
PC-3p-12725_949	XM_016103633.2	1205	1224	1216	-39.4	-26.9	0.682741	6.5	2-5,1223-1220;7-20,1219-1206	1-1,1224-1224[UP5];6-6,x-x[BULq];21-21,1205-1205[UP3]	.((((((((((((((-((((.&.)))).)))))))))))))).	CAGGGAUCAAGUUGG-GGGAG&UUCCCGUCGACUUGAUCUCUC	0	0	NA	NA	NA	0	0	NA	NA	NA	1	26.8255	4	0.991781	Output/S24h/cleaveLand_result/t_plot/PC-3p-12725_949_XM_016103633.2_1216_TPlot.pdf	0	0	26.8255	2.2374e-12	2.55455e-12	yes	NA	NA
PC-3p-12725_949	XM_016103754.2	549	567	558	-39.4	-27.2	0.690355	7.5	1-11,567-557;14-19,556-551	12-13,x-x[BULq];20-21,550-549[UP3]	..((((((--(((((((((((&)))))))))))..))))))..	UCGAGGUC--GUCGGCGGGGA&UUCCCGUCGACUUGAUCUCUC	0	0	NA	NA	NA	0	0	NA	NA	NA	2	53.6509	2	0.657413	Output/S24h/cleaveLand_result/t_plot/PC-3p-12725_949_XM_016103754.2_558_TPlot.pdf	0	0	53.6509	5.0035e-24	2.27989e-23	yes	NA	NA
PC-3p-12725_949	XM_016103754.2	815	835	826	-39.4	-26.8	0.680203	5.5	1-10,835-826;12-19,825-818;20-21,816-815	11-11,x-x[BULq];x-x,817-817[BULt]	((.((((((((-((((((((((&)))))))))).))))))))-))	GAUGAGGUCGA-UUGACGGGAG&UUCCCGUCGACUUGAUCUC-UC	1	30.281	4	0.989076	Output/S0h/cleaveLand_result/t_plot/PC-3p-12725_949_XM_016103754.2_826_TPlot.pdf	0	0	NA	NA	NA	0	0	NA	NA	NA	30.281	0	0	7.0631e-14	1.09903e-13	yes	NA	NA
PC-3p-12725_949	XM_016105435.2	697	716	708	-39.4	-26.5	0.672589	7	3-8,714-709;10-20,708-698	1-2,716-715[UP5];9-9,x-x[BULq];21-21,697-697[UP3]	.(((((((((((-((((((..&..)))))).))))))))))).	AAGAGAUCAAGU-GAUGGGCA&UUCCCGUCGACUUGAUCUCUC	0	0	NA	NA	NA	0	0	NA	NA	NA	2	53.6509	2	0.902398	Output/S24h/cleaveLand_result/t_plot/PC-3p-12725_949_XM_016105435.2_708_TPlot.pdf	0	0	53.6509	5.0035e-24	2.27989e-23	yes	GO:0060255(regulation of macromolecule metabolic process);GO:0006355(regulation of transcription, DNA-templated);GO:0050789(regulation of biological process);GO:2001141(regulation of RNA biosynthetic process);GO:0042393(histone binding);GO:0031323(regulation of cellular metabolic process);GO:0008270(zinc ion binding);GO:0010556(regulation of macromolecule biosynthetic process);GO:0031326(regulati…	NA
PC-3p-12725_949	XM_016108390.2	1230	1248	1241	-39.4	-27.1	0.687817	8.5	3-6,1246-1243;8-9,1242-1241;11-21,1240-1230	1-2,1248-1247[UP5];7-7,x-x[BULq];10-10,x-x[BULq]	(((((((((((-((-((((..&..)))).)).)))))))))))	GAGAGGUCAGG-CG-CGGGCA&UUCCCGUCGACUUGAUCUCUC	1	30.281	4	0.946559	Output/S0h/cleaveLand_result/t_plot/PC-3p-12725_949_XM_016108390.2_1241_TPlot.pdf	0	0	NA	NA	NA	2	53.6509	2	0.683444	Output/S24h/cleaveLand_result/t_plot/PC-3p-12725_949_XM_016108390.2_1241_TPlot.pdf	30.281	0	53.6509	5.8531e-12	6.61749e-12	yes	GO:0048471(perinuclear region of cytoplasm);GO:0009816(defense response to bacterium, incompatible interaction);GO:0031348(negative regulation of defense response);GO:0065007(biological regulation);GO:0043227(membrane-bounded organelle);GO:0009605(response to external stimulus);GO:0043207(response to external biotic stimulus);GO:0045087(innate immune response);GO:0048519(negative regulation of bi…	ko00514(Other types of O-glycan biosynthesis)
PC-3p-12725_949	XM_016110426.2	2455	2474	2466	-39.4	-30.5	0.774112	5.5	1-9,2474-2466;11-12,2465-2464;14-21,2462-2455	10-10,x-x[BULq];13-13,2463-2463[SIL]	((((((((.((-(((((((((&))))))))).)).))))))))	GAGGGAUCCGG-CGACGGGGA&UUCCCGUCGACUUGAUCUCUC	0	0	NA	NA	NA	0	0	NA	NA	NA	2	53.6509	2	0.0345127	Output/S24h/cleaveLand_result/t_plot/PC-3p-12725_949_XM_016110426.2_2466_TPlot.pdf	0	0	53.6509	5.0035e-24	2.27989e-23	yes	GO:0097159(organic cyclic compound binding);GO:0003676(nucleic acid binding);GO:1901363(heterocyclic compound binding);GO:0005488(binding)	ko02010(ABC transporters)
PC-3p-12725_949	XM_016112267.2	1112	1134	1124	-39.4	-26.6	0.675127	7	2-3,1133-1132;4-6,1130-1128;8-15,1126-1119;16-21,1117-1112	1-1,1134-1134[UP5];x-x,1131-1131[BULt];7-7,1127-1127[SIL];x-x,1118-1118[BULt]	((((((.((((((((.(((.((.&.))-))).))))))))-))))))	GAGAGACUCAAGUUGUCGGAGAU&UUC-CCGUCGACUUGA-UCUCUC	0	0	NA	NA	NA	1	33.3045	4	0.995953	Output/S8h/cleaveLand_result/t_plot/PC-3p-12725_949_XM_016112267.2_1124_TPlot.pdf	0	0	NA	NA	NA	0	33.3045	0	3.4347e-15	7.86611e-15	yes	GO:0003824(catalytic activity);GO:0005488(binding);GO:0050662(coenzyme binding);GO:0048037(cofactor binding)	ko00040(Pentose and glucuronate interconversions);ko04120(Ubiquitin mediated proteolysis);ko01100(Metabolic pathways)
PC-3p-12725_949	XM_016112522.2	463	484	474	-39.4	-28.3	0.718274	5.5	1-8,484-477;9-13,475-471;16-21,468-463	x-x,476-476[BULt];14-15,470-469[SIL]	((((((..(((((.((((((((&))))))))-)))))..))))))	GAGAGGAGAAGUCAGGCGGGAA&UUCCCGUC-GACUUGAUCUCUC	0	0	NA	NA	NA	0	0	NA	NA	NA	1	26.8255	4	0.543133	Output/S24h/cleaveLand_result/t_plot/PC-3p-12725_949_XM_016112522.2_474_TPlot.pdf	0	0	26.8255	2.2374e-12	2.55455e-12	yes	GO:0019222(regulation of metabolic process);GO:0031323(regulation of cellular metabolic process);GO:0043226(organelle);GO:0044464(cell part);GO:0060255(regulation of macromolecule metabolic process);GO:0003677(DNA binding);GO:0043231(intracellular membrane-bounded organelle);GO:0003676(nucleic acid binding);GO:0005488(binding);GO:2000112(regulation of cellular macromolecule biosynthetic process);…	ko04016(MAPK signaling pathway - plant)
PC-3p-12725_949	XM_016112605.2	1789	1810	1801	-39.4	-29	0.736041	5.5	1-8,1810-1803;10-14,1801-1797;16-21,1794-1789	9-9,1802-1802[SIL];15-15,1796-1795[AILt]	((((((..(((((.((((((((&)))))))).)))))-.))))))	GAGAGACCCAAGUGGAUGGGAG&UUCCCGUCGACUUG-AUCUCUC	0	0	NA	NA	NA	1	33.3045	4	0.318133	Output/S8h/cleaveLand_result/t_plot/PC-3p-12725_949_XM_016112605.2_1801_TPlot.pdf	0	0	NA	NA	NA	0	33.3045	0	3.4347e-15	7.86611e-15	yes	GO:0043229(intracellular organelle);GO:0009987(cellular process);GO:0009056(catabolic process);GO:0044424(intracellular part);GO:0043231(intracellular membrane-bounded organelle);GO:0044237(cellular metabolic process);GO:0043226(organelle);GO:0044248(cellular catabolic process);GO:0006914(autophagy);GO:0005622(intracellular);GO:0005623(cell);GO:0044464(cell part);GO:0061919(process utilizing auto…	NA
PC-3p-12725_949	XM_016114216.2	1538	1557	1549	-39.4	-25.8	0.654822	7	1-8,1557-1550;10-18,1549-1541	9-9,x-x[BULq];19-21,1540-1538[UP3]	...(((((((((-((((((((&)))))))).)))))))))...	CCAGGAUCAAGU-GGCGGGAG&UUCCCGUCGACUUGAUCUCUC	0	0	NA	NA	NA	0	0	NA	NA	NA	1	26.8255	4	0.999978	Output/S24h/cleaveLand_result/t_plot/PC-3p-12725_949_XM_016114216.2_1549_TPlot.pdf	0	0	26.8255	2.2374e-12	2.55455e-12	yes	GO:0097159(organic cyclic compound binding);GO:1901363(heterocyclic compound binding);GO:0003723(RNA binding);GO:0005488(binding);GO:0003676(nucleic acid binding)	NA
PC-3p-12725_949	XM_016116153.2	1422	1448	1438	-39.4	-25.7	0.652284	16.5	1-5,1448-1444;7-12,1441-1436;13-21,1430-1422	6-6,1443-1442[AILt];x-x,1435-1431[BULt]	(((((((((.....((((((..(((((&)))))-.))))))-----)))))))))	GAGGGAUCAAGUGAGGUUGAGAGGGAA&UUCCC-GUCGACU-----UGAUCUCUC	1	30.281	4	0.999967	Output/S0h/cleaveLand_result/t_plot/PC-3p-12725_949_XM_016116153.2_1438_TPlot.pdf	0	0	NA	NA	NA	0	0	NA	NA	NA	30.281	0	0	7.0631e-14	1.09903e-13	yes	GO:0046872(metal ion binding);GO:0005488(binding);GO:0016020(membrane);GO:0043167(ion binding);GO:0043169(cation binding)	NA
PC-3p-12725_949	XM_016117149.2	1434	1455	1445	-39.4	-25.8	0.654822	8	1-3,1455-1453;4-9,1451-1446;11-20,1444-1435	x-x,1452-1452[BULt];10-10,1445-1445[SIL];21-21,1434-1434[UP3]	.((((((((((.((((((.(((&)))-)))))).)))))))))).	CGGAGAUUAGGGCGGCGGUGAA&UUC-CCGUCGACUUGAUCUCUC	1	30.281	4	0.99993	Output/S0h/cleaveLand_result/t_plot/PC-3p-12725_949_XM_016117149.2_1445_TPlot.pdf	5	166.522	2	0.955344	Output/S8h/cleaveLand_result/t_plot/PC-3p-12725_949_XM_016117149.2_1445_TPlot.pdf	1	26.8255	4	0.99998	Output/S24h/cleaveLand_result/t_plot/PC-3p-12725_949_XM_016117149.2_1445_TPlot.pdf	30.281	166.522	26.8255	1.0288e-37	1.70345e-36	yes	GO:0034357(photosynthetic membrane);GO:0031967(organelle envelope);GO:0071704(organic substance metabolic process);GO:0044281(small molecule metabolic process);GO:0005506(iron ion binding);GO:0044464(cell part);GO:0044283(small molecule biosynthetic process);GO:0046394(carboxylic acid biosynthetic process);GO:1901576(organic substance biosynthetic process);GO:0005622(intracellular);GO:0008152(met…	ko01100(Metabolic pathways);ko01110(Biosynthesis of secondary metabolites);ko00592(alpha-Linolenic acid metabolism)
PC-3p-12725_949	XM_021132483.1	628	657	648	-39.4	-27.2	0.690355	22.5	1-5,657-653;7-12,651-646;13-21,636-628	6-6,652-652[SIL];x-x,645-637[BULt]	(((((((((.........((((((.(((((&))))).))))))---------)))))))))	GGGAGAUCACACCAUCAUGGUCGGAGGGAA&UUCCCGUCGACU---------UGAUCUCUC	0	0	NA	NA	NA	1	33.3045	4	0.931467	Output/S8h/cleaveLand_result/t_plot/PC-3p-12725_949_XM_021132483.1_648_TPlot.pdf	0	0	NA	NA	NA	0	33.3045	0	3.4347e-15	7.86611e-15	yes	GO:0003824(catalytic activity);GO:0044260(cellular macromolecule metabolic process);GO:0043169(cation binding);GO:0043170(macromolecule metabolic process);GO:0009056(catabolic process);GO:0032446(protein modification by small protein conjugation);GO:0008152(metabolic process);GO:0036211(protein modification process);GO:0071704(organic substance metabolic process);GO:0051603(proteolysis involved i…	NA
PC-3p-12725_949	XM_021132486.1	443	472	463	-39.4	-27.2	0.690355	22.5	1-5,472-468;7-12,466-461;13-21,451-443	6-6,467-467[SIL];x-x,460-452[BULt]	(((((((((.........((((((.(((((&))))).))))))---------)))))))))	GGGAGAUCACACCAUCAUGGUCGGAGGGAA&UUCCCGUCGACU---------UGAUCUCUC	0	0	NA	NA	NA	0	0	NA	NA	NA	1	26.8255	4	0.9493	Output/S24h/cleaveLand_result/t_plot/PC-3p-12725_949_XM_021132486.1_463_TPlot.pdf	0	0	26.8255	2.2374e-12	2.55455e-12	yes	GO:0003824(catalytic activity);GO:0044260(cellular macromolecule metabolic process);GO:0043169(cation binding);GO:0043170(macromolecule metabolic process);GO:0009056(catabolic process);GO:0032446(protein modification by small protein conjugation);GO:0008152(metabolic process);GO:0036211(protein modification process);GO:0071704(organic substance metabolic process);GO:0051603(proteolysis involved i…	NA
PC-3p-12725_949	XM_021132488.1	388	417	408	-39.4	-27.2	0.690355	22.5	1-5,417-413;7-12,411-406;13-21,396-388	6-6,412-412[SIL];x-x,405-397[BULt]	(((((((((.........((((((.(((((&))))).))))))---------)))))))))	GGGAGAUCACACCAUCAUGGUCGGAGGGAA&UUCCCGUCGACU---------UGAUCUCUC	0	0	NA	NA	NA	1	33.3045	4	0.907691	Output/S8h/cleaveLand_result/t_plot/PC-3p-12725_949_XM_021132488.1_408_TPlot.pdf	0	0	NA	NA	NA	0	33.3045	0	3.4347e-15	7.86611e-15	yes	GO:0003824(catalytic activity);GO:0044260(cellular macromolecule metabolic process);GO:0043169(cation binding);GO:0043170(macromolecule metabolic process);GO:0009056(catabolic process);GO:0032446(protein modification by small protein conjugation);GO:0008152(metabolic process);GO:0036211(protein modification process);GO:0071704(organic substance metabolic process);GO:0051603(proteolysis involved i…	NA
PC-3p-12725_949	XM_021138127.1	123	147	138	-39.4	-27.3	0.692893	9	1-5,147-143;7-11,141-137;12-15,134-131;16-21,128-123	6-6,142-142[SIL];x-x,136-135[BULt];x-x,130-129[BULt]	((((((..((((..(((((.(((((&))))).)))))--))))--))))))	GAGAGAAAUCAGAUGUCGAGGGGAA&UUCCCGUCGAC--UUGA--UCUCUC	0	0	NA	NA	NA	0	0	NA	NA	NA	1	26.8255	4	0.936353	Output/S24h/cleaveLand_result/t_plot/PC-3p-12725_949_XM_021138127.1_138_TPlot.pdf	0	0	26.8255	2.2374e-12	2.55455e-12	yes	GO:0016021(integral component of membrane);GO:0031224(intrinsic component of membrane);GO:0044425(membrane part);GO:0016020(membrane)	NA
PC-3p-12725_949	XM_021138324.1	515	535	526	-39.4	-27.2	0.690355	5.5	1-12,535-524;15-20,521-516	13-14,523-522[SIL];21-21,515-515[UP3]	.((((((..((((((((((((&))))))))))))..)))))).	UGGAGAUAUAGUUGAUGGGAA&UUCCCGUCGACUUGAUCUCUC	0	0	NA	NA	NA	0	0	NA	NA	NA	1	26.8255	4	0.959614	Output/S24h/cleaveLand_result/t_plot/PC-3p-12725_949_XM_021138324.1_526_TPlot.pdf	0	0	26.8255	2.2374e-12	2.55455e-12	yes	GO:0016787(hydrolase activity);GO:0003824(catalytic activity)	ko00564(Glycerophospholipid metabolism);ko00230(Purine metabolism)
PC-3p-12911_938	BGI_novel_T004127	1589	1610	1600	-28.7	-18.7	0.651568	13	2-9,1609-1602;14-21,1596-1589	1-1,1610-1610[UP5];10-13,1601-1597[AILt]	((((((((.....((((((((.&.))))))))-....))))))))	GCUGAGCUUGGAGAGUUGAAGC&UUUUUAAUU-AAGUAGCUCAGC	2	60.562	2	0.999864	Output/S0h/cleaveLand_result/t_plot/PC-3p-12911_938_BGI_novel_T004127_1600_TPlot.pdf	1	33.3045	4	1	Output/S8h/cleaveLand_result/t_plot/PC-3p-12911_938_BGI_novel_T004127_1600_TPlot.pdf	0	0	NA	NA	NA	60.562	33.3045	0	1.6983e-13	2.61781e-13	yes	GO:0003723(RNA binding);GO:0097159(organic cyclic compound binding);GO:0003676(nucleic acid binding);GO:1901265(nucleoside phosphate binding);GO:0000166(nucleotide binding);GO:0005488(binding);GO:0036094(small molecule binding);GO:1901363(heterocyclic compound binding)	ko03013(RNA transport);ko03040(Spliceosome);ko03015(mRNA surveillance pathway)
PC-3p-12911_938	BGI_novel_T005230	1162	1182	1173	-28.7	-19.5	0.679443	14.5	7-21,1176-1162	1-6,1182-1177[UP5]	(((((((((((((((......&......)))))))))))))))	GUUGAGUUGCUUGGUGUCAAA&UUUUUAAUUAAGUAGCUCAGC	0	0	NA	NA	NA	1	33.3045	4	0.999998	Output/S8h/cleaveLand_result/t_plot/PC-3p-12911_938_BGI_novel_T005230_1173_TPlot.pdf	0	0	NA	NA	NA	0	33.3045	0	3.4347e-15	7.86611e-15	yes	NA	NA
PC-3p-12911_938	BGI_novel_T005231	1162	1182	1173	-28.7	-19.5	0.679443	14.5	7-21,1176-1162	1-6,1182-1177[UP5]	(((((((((((((((......&......)))))))))))))))	GUUGAGUUGCUUGGUGUCAAA&UUUUUAAUUAAGUAGCUCAGC	0	0	NA	NA	NA	1	33.3045	4	0.999998	Output/S8h/cleaveLand_result/t_plot/PC-3p-12911_938_BGI_novel_T005231_1173_TPlot.pdf	0	0	NA	NA	NA	0	33.3045	0	3.4347e-15	7.86611e-15	yes	NA	NA
PC-3p-12911_938	BGI_novel_T006280	815	835	826	-28.7	-18.8	0.655052	15.5	8-16,828-820;18-21,818-815	1-7,835-829[UP5];17-17,819-819[SIL]	((((.(((((((((.......&.......))))))))).))))	GCUGUGCUGCUUGACAACGAA&UUUUUAAUUAAGUAGCUCAGC	2	60.562	3	0.90471	Output/S0h/cleaveLand_result/t_plot/PC-3p-12911_938_BGI_novel_T006280_826_TPlot.pdf	1	33.3045	4	1	Output/S8h/cleaveLand_result/t_plot/PC-3p-12911_938_BGI_novel_T006280_826_TPlot.pdf	0	0	NA	NA	NA	60.562	33.3045	0	1.6983e-13	2.61781e-13	yes	GO:0043168(anion binding);GO:0003824(catalytic activity);GO:0032549(ribonucleoside binding);GO:0043232(intracellular non-membrane-bounded organelle);GO:0005198(structural molecule activity);GO:0016818(hydrolase activity, acting on acid anhydrides, in phosphorus-containing anhydrides);GO:0044424(intracellular part);GO:1901265(nucleoside phosphate binding);GO:0032553(ribonucleotide binding);GO:0044…	ko04145(Phagosome)
PC-3p-12911_938	BGI_novel_T006282	815	835	826	-28.7	-18.8	0.655052	15.5	8-16,828-820;18-21,818-815	1-7,835-829[UP5];17-17,819-819[SIL]	((((.(((((((((.......&.......))))))))).))))	GCUGUGCUGCUUGACAACGAA&UUUUUAAUUAAGUAGCUCAGC	0	0	NA	NA	NA	2	66.6089	3	0.88365	Output/S8h/cleaveLand_result/t_plot/PC-3p-12911_938_BGI_novel_T006282_826_TPlot.pdf	0	0	NA	NA	NA	0	66.6089	0	1.1789e-29	9.89421e-29	yes	GO:0043168(anion binding);GO:0003824(catalytic activity);GO:0032549(ribonucleoside binding);GO:0043232(intracellular non-membrane-bounded organelle);GO:0005198(structural molecule activity);GO:0016818(hydrolase activity, acting on acid anhydrides, in phosphorus-containing anhydrides);GO:0044424(intracellular part);GO:1901265(nucleoside phosphate binding);GO:0032553(ribonucleotide binding);GO:0044…	ko04145(Phagosome)
PC-3p-12911_938	BGI_novel_T006910	84	95	86	-28.7	-20.8	0.724739	3	11-21,94-84	10-10,95-95[SIL]	(((((((((((.&.)))))))))))	GCUGAGCUGCUG&UUUUUAAUUAAG	0	0	NA	NA	NA	0	0	NA	NA	NA	1	26.8255	4	0.9493	Output/S24h/cleaveLand_result/t_plot/PC-3p-12911_938_BGI_novel_T006910_86_TPlot.pdf	0	0	26.8255	2.2374e-12	2.55455e-12	yes	GO:0071702(organic substance transport);GO:0015833(peptide transport);GO:0051179(localization);GO:0072594(establishment of protein localization to organelle);GO:0051651(maintenance of location in cell);GO:0033365(protein localization to organelle);GO:0065007(biological regulation);GO:0005623(cell);GO:0046907(intracellular transport);GO:0045185(maintenance of protein location);GO:0034613(cellular …	NA
PC-3p-12911_938	BGI_novel_T006913	84	95	86	-28.7	-20.8	0.724739	3	11-21,94-84	10-10,95-95[SIL]	(((((((((((.&.)))))))))))	GCUGAGCUGCUG&UUUUUAAUUAAG	0	0	NA	NA	NA	0	0	NA	NA	NA	2	53.6509	0	0.0349575	Output/S24h/cleaveLand_result/t_plot/PC-3p-12911_938_BGI_novel_T006913_86_TPlot.pdf	0	0	53.6509	5.0035e-24	2.27989e-23	yes	GO:0071702(organic substance transport);GO:0015833(peptide transport);GO:0051179(localization);GO:0072594(establishment of protein localization to organelle);GO:0051651(maintenance of location in cell);GO:0033365(protein localization to organelle);GO:0065007(biological regulation);GO:0005623(cell);GO:0046907(intracellular transport);GO:0045185(maintenance of protein location);GO:0034613(cellular …	NA
PC-3p-12911_938	BGI_novel_T007307	794	814	805	-28.7	-19.5	0.679443	10	5-18,810-797	1-4,814-811[UP5];19-21,796-794[UP3]	...((((((((((((((....&....))))))))))))))...	AAGGAGCUACUUAAUUACGUC&UUUUUAAUUAAGUAGCUCAGC	3	90.843	0	0.127059	Output/S0h/cleaveLand_result/t_plot/PC-3p-12911_938_BGI_novel_T007307_805_TPlot.pdf	0	0	NA	NA	NA	0	0	NA	NA	NA	90.843	0	0	3.5171e-40	6.21445e-39	yes	GO:0006807(nitrogen compound metabolic process);GO:0006457(protein folding);GO:0043412(macromolecule modification);GO:0018193(peptidyl-amino acid modification);GO:0003755(peptidyl-prolyl cis-trans isomerase activity);GO:0044260(cellular macromolecule metabolic process);GO:0018208(peptidyl-proline modification);GO:0003824(catalytic activity);GO:0044267(cellular protein metabolic process);GO:000041…	ko03040(Spliceosome)
PC-3p-12911_938	BGI_novel_T007392	1269	1289	1280	-28.7	-19.5	0.679443	6.5	1-6,1289-1284;8-9,1282-1281;11-21,1279-1269	7-7,1283-1283[SIL];10-10,1280-1280[SIL]	(((((((((((.((.((((((&)))))).)).)))))))))))	GCUGAGUUACUCAAAUGGAAA&UUUUUAAUUAAGUAGCUCAGC	0	0	NA	NA	NA	0	0	NA	NA	NA	1	26.8255	4	1	Output/S24h/cleaveLand_result/t_plot/PC-3p-12911_938_BGI_novel_T007392_1280_TPlot.pdf	0	0	26.8255	2.2374e-12	2.55455e-12	yes	GO:0005622(intracellular);GO:0007154(cell communication);GO:0044464(cell part);GO:0051345(positive regulation of hydrolase activity);GO:0043085(positive regulation of catalytic activity);GO:0050896(response to stimulus);GO:0065007(biological regulation);GO:0050794(regulation of cellular process);GO:0005623(cell);GO:0007264(small GTPase mediated signal transduction);GO:0065009(regulation of molecu…	NA
PC-3p-12911_938	BGI_novel_T007598	601	621	612	-28.7	-18.94	0.65993	15	1-6,621-616;12-21,610-601	7-11,615-611[SIL]	((((((((((.....((((((&)))))).....))))))))))	GCUGAGCUAUGUCAGUGGGGA&UUUUUAAUUAAGUAGCUCAGC	0	0	NA	NA	NA	1	33.3045	4	1	Output/S8h/cleaveLand_result/t_plot/PC-3p-12911_938_BGI_novel_T007598_612_TPlot.pdf	0	0	NA	NA	NA	0	33.3045	0	3.4347e-15	7.86611e-15	yes	GO:0044085(cellular component biogenesis);GO:0071704(organic substance metabolic process);GO:0019538(protein metabolic process);GO:0010556(regulation of macromolecule biosynthetic process);GO:0097159(organic cyclic compound binding);GO:0043170(macromolecule metabolic process);GO:0044260(cellular macromolecule metabolic process);GO:0034645(cellular macromolecule biosynthetic process);GO:0044237(ce…	ko03013(RNA transport)
PC-3p-12911_938	BGI_novel_T009578	205	229	218	-28.7	-20.9	0.728223	10	1-6,229-224;7-10,221-218;11-21,215-205	x-x,223-222[BULt];x-x,217-216[BULt]	(((((((((((..((((..((((((&))))))--))))--)))))))))))	GCUGAGCUACUAGUAGUAAUAAGAA&UUUUUA--AUUA--AGUAGCUCAGC	0	0	NA	NA	NA	0	0	NA	NA	NA	1	26.8255	4	0.927781	Output/S24h/cleaveLand_result/t_plot/PC-3p-12911_938_BGI_novel_T009578_218_TPlot.pdf	0	0	26.8255	2.2374e-12	2.55455e-12	yes	GO:0016853(isomerase activity);GO:0000413(protein peptidyl-prolyl isomerization);GO:0071704(organic substance metabolic process);GO:0003755(peptidyl-prolyl cis-trans isomerase activity);GO:0018193(peptidyl-amino acid modification);GO:0009987(cellular process);GO:0044237(cellular metabolic process);GO:0036211(protein modification process);GO:0044260(cellular macromolecule metabolic process);GO:004…	NA
PC-3p-12911_938	BGI_novel_T010837	938	958	949	-28.7	-18.9	0.658537	17.5	9-21,950-938	1-8,958-951[UP5]	(((((((((((((........&........)))))))))))))	GUUGGGCUGCUUGCUCCGGAU&UUUUUAAUUAAGUAGCUCAGC	0	0	NA	NA	NA	0	0	NA	NA	NA	1	26.8255	4	1	Output/S24h/cleaveLand_result/t_plot/PC-3p-12911_938_BGI_novel_T010837_949_TPlot.pdf	0	0	26.8255	2.2374e-12	2.55455e-12	yes	GO:0009221(pyrimidine deoxyribonucleotide biosynthetic process);GO:0043168(anion binding);GO:0005737(cytoplasm);GO:0044444(cytoplasmic part);GO:0009262(deoxyribonucleotide metabolic process);GO:1901576(organic substance biosynthetic process);GO:0009165(nucleotide biosynthetic process);GO:0016772(transferase activity, transferring phosphorus-containing groups);GO:0017076(purine nucleotide binding)…	ko01100(Metabolic pathways);ko00240(Pyrimidine metabolism)
PC-3p-12911_938	XM_016076656.2	820	840	831	-28.7	-20.2	0.703833	7	2-5,839-836;8-13,833-828;15-21,826-820	1-1,840-840[UP5];6-7,835-834[SIL];14-14,827-827[SIL]	(((((((.((((((..((((.&.))))..)))))).)))))))	GCUGAGCAACUUAAGAAGAAG&UUUUUAAUUAAGUAGCUCAGC	1	30.281	4	0.999347	Output/S0h/cleaveLand_result/t_plot/PC-3p-12911_938_XM_016076656.2_831_TPlot.pdf	0	0	NA	NA	NA	0	0	NA	NA	NA	30.281	0	0	7.0631e-14	1.09903e-13	yes	GO:0046872(metal ion binding);GO:0051234(establishment of localization);GO:0006811(ion transport);GO:0005488(binding);GO:0030001(metal ion transport);GO:0051179(localization);GO:0006810(transport);GO:0043169(cation binding);GO:0043167(ion binding);GO:0006812(cation transport)	NA
PC-3p-12911_938	XM_016076863.2	205	229	218	-28.7	-20.9	0.728223	10	1-6,229-224;7-10,221-218;11-21,215-205	x-x,223-222[BULt];x-x,217-216[BULt]	(((((((((((..((((..((((((&))))))--))))--)))))))))))	GCUGAGCUACUAGUAGUAAUAAGAA&UUUUUA--AUUA--AGUAGCUCAGC	0	0	NA	NA	NA	0	0	NA	NA	NA	1	26.8255	4	0.924038	Output/S24h/cleaveLand_result/t_plot/PC-3p-12911_938_XM_016076863.2_218_TPlot.pdf	0	0	26.8255	2.2374e-12	2.55455e-12	yes	GO:0016853(isomerase activity);GO:0000413(protein peptidyl-prolyl isomerization);GO:0071704(organic substance metabolic process);GO:0003755(peptidyl-prolyl cis-trans isomerase activity);GO:0018193(peptidyl-amino acid modification);GO:0009987(cellular process);GO:0044237(cellular metabolic process);GO:0036211(protein modification process);GO:0044260(cellular macromolecule metabolic process);GO:004…	NA
PC-3p-12911_938	XM_016077070.2	1016	1027	1018	-28.7	-19.7	0.686411	4	11-21,1026-1016	10-10,1027-1027[SIL]	(((((((((((.&.)))))))))))	GCUGGGCUGCUA&UUUUUAAUUAAG	0	0	NA	NA	NA	0	0	NA	NA	NA	1	26.8255	4	0.999998	Output/S24h/cleaveLand_result/t_plot/PC-3p-12911_938_XM_016077070.2_1018_TPlot.pdf	0	0	26.8255	2.2374e-12	2.55455e-12	yes	GO:0031224(intrinsic component of membrane);GO:0016021(integral component of membrane);GO:0016020(membrane);GO:0044425(membrane part)	NA
PC-3p-12911_938	XM_016078799.2	1982	2003	1994	-28.7	-19.1	0.665505	7	1-7,2003-1997;9-17,1995-1987;18-20,1985-1983	8-8,1996-1996[SIL];x-x,1986-1986[BULt];21-21,1982-1982[UP3]	.(((.(((((((((.(((((((&))))))).)))))))))-))).	ACUGUAGCUACUUGCUUGAAGA&UUUUUAAUUAAGUAGCU-CAGC	0	0	NA	NA	NA	1	33.3045	4	1	Output/S8h/cleaveLand_result/t_plot/PC-3p-12911_938_XM_016078799.2_1994_TPlot.pdf	0	0	NA	NA	NA	0	33.3045	0	3.4347e-15	7.86611e-15	yes	GO:0006796(phosphate-containing compound metabolic process);GO:0004722(protein serine/threonine phosphatase activity);GO:0016791(phosphatase activity);GO:0009987(cellular process);GO:0036211(protein modification process);GO:0016787(hydrolase activity);GO:0044238(primary metabolic process);GO:0008152(metabolic process);GO:0006793(phosphorus metabolic process);GO:0006807(nitrogen compound metabolic…	NA
PC-3p-12911_938	XM_016079082.2	753	775	765	-28.7	-20.1	0.700348	11.5	1-8,775-768;11-16,764-759;17-21,757-753	9-10,767-765[AILt];x-x,758-758[BULt]	(((((.((((((...((((((((&))))))))-..))))))-)))))	GCUGGUGCUACUGCUGUUGAGGA&UUUUUAAU-UAAGUAGC-UCAGC	0	0	NA	NA	NA	0	0	NA	NA	NA	1	26.8255	4	0.999879	Output/S24h/cleaveLand_result/t_plot/PC-3p-12911_938_XM_016079082.2_765_TPlot.pdf	0	0	26.8255	2.2374e-12	2.55455e-12	yes	GO:0016684(oxidoreductase activity, acting on peroxide as acceptor);GO:0003824(catalytic activity);GO:1901363(heterocyclic compound binding);GO:0016491(oxidoreductase activity);GO:0042221(response to chemical);GO:0009636(response to toxic substance);GO:1990748(cellular detoxification);GO:0098754(detoxification);GO:0004601(peroxidase activity);GO:0050896(response to stimulus);GO:0046906(tetrapyrro…	ko00053(Ascorbate and aldarate metabolism);ko00480(Glutathione metabolism)
PC-3p-12911_938	XM_016079084.2	753	775	765	-28.7	-20.1	0.700348	11.5	1-8,775-768;11-16,764-759;17-21,757-753	9-10,767-765[AILt];x-x,758-758[BULt]	(((((.((((((...((((((((&))))))))-..))))))-)))))	GCUGGUGCUACUGCUGUUGAGGA&UUUUUAAU-UAAGUAGC-UCAGC	1	30.281	4	0.999695	Output/S0h/cleaveLand_result/t_plot/PC-3p-12911_938_XM_016079084.2_765_TPlot.pdf	0	0	NA	NA	NA	0	0	NA	NA	NA	30.281	0	0	7.0631e-14	1.09903e-13	yes	GO:0016684(oxidoreductase activity, acting on peroxide as acceptor);GO:0003824(catalytic activity);GO:1901363(heterocyclic compound binding);GO:0016491(oxidoreductase activity);GO:0042221(response to chemical);GO:0009636(response to toxic substance);GO:1990748(cellular detoxification);GO:0098754(detoxification);GO:0004601(peroxidase activity);GO:0050896(response to stimulus);GO:0046906(tetrapyrro…	ko00053(Ascorbate and aldarate metabolism);ko00480(Glutathione metabolism)
PC-3p-12911_938	XM_016079933.2	608	629	620	-28.7	-18.9	0.658537	8	2-18,628-612;19-21,610-608	1-1,629-629[UP5];x-x,611-611[BULt]	(((.(((((((((((((((((.&.)))))))))))))))))-)))	GUUGGGGUUGCUUGGUUAAGGG&UUUUUAAUUAAGUAGCUC-AGC	1	30.281	4	1	Output/S0h/cleaveLand_result/t_plot/PC-3p-12911_938_XM_016079933.2_620_TPlot.pdf	0	0	NA	NA	NA	0	0	NA	NA	NA	30.281	0	0	7.0631e-14	1.09903e-13	yes	GO:0003676(nucleic acid binding);GO:0005488(binding);GO:0097159(organic cyclic compound binding);GO:1901363(heterocyclic compound binding);GO:0003723(RNA binding)	NA
PC-3p-12911_938	XM_016083951.1	1296	1306	1297	-28.7	-19.4	0.675958	2	12-21,1305-1296	11-11,1306-1306[SIL]	((((((((((.&.))))))))))	GCUGAGCUACG&UUUUUAAUUAA	0	0	NA	NA	NA	0	0	NA	NA	NA	1	26.8255	4	1	Output/S24h/cleaveLand_result/t_plot/PC-3p-12911_938_XM_016083951.1_1297_TPlot.pdf	0	0	26.8255	2.2374e-12	2.55455e-12	yes	NA	NA
PC-3p-12911_938	XM_016084473.2	1189	1209	1200	-28.7	-18.9	0.658537	14	7-18,1203-1192;20-21,1190-1189	1-6,1209-1204[UP5];19-19,1191-1191[SIL]	((.((((((((((((......&......)))))))))))).))	GCAGGGCUGCUUAGUGCUUAC&UUUUUAAUUAAGUAGCUCAGC	1	30.281	4	1	Output/S0h/cleaveLand_result/t_plot/PC-3p-12911_938_XM_016084473.2_1200_TPlot.pdf	0	0	NA	NA	NA	0	0	NA	NA	NA	30.281	0	0	7.0631e-14	1.09903e-13	yes	GO:0005451(monovalent cation:proton antiporter activity);GO:0044464(cell part);GO:0050801(ion homeostasis);GO:0006812(cation transport);GO:0015078(hydrogen ion transmembrane transporter activity);GO:0048878(chemical homeostasis);GO:0015081(sodium ion transmembrane transporter activity);GO:0005737(cytoplasm);GO:0055065(metal ion homeostasis);GO:0034220(ion transmembrane transport);GO:0043229(intra…	NA
PC-3p-12911_938	XM_016084585.2	997	1019	1009	-28.7	-20.4	0.710801	8.5	2-9,1018-1011;11-17,1008-1002;18-21,1000-997	1-1,1019-1019[UP5];10-10,1010-1009[AILt];x-x,1001-1001[BULt]	((((.(((((((..((((((((.&.))))))))-.)))))))-))))	GCUGCAGCUGCUGCAAUUAGGAU&UUUUUAAUU-AAGUAGCU-CAGC	0	0	NA	NA	NA	0	0	NA	NA	NA	2	53.6509	3	0.484604	Output/S24h/cleaveLand_result/t_plot/PC-3p-12911_938_XM_016084585.2_1009_TPlot.pdf	0	0	53.6509	5.0035e-24	2.27989e-23	yes	GO:0004124(cysteine synthase activity);GO:1901564(organonitrogen compound metabolic process);GO:0006535(cysteine biosynthetic process from serine);GO:0044272(sulfur compound biosynthetic process);GO:0019752(carboxylic acid metabolic process);GO:0006807(nitrogen compound metabolic process);GO:0016829(lyase activity);GO:0044283(small molecule biosynthetic process);GO:0044281(small molecule metaboli…	ko00270(Cysteine and methionine metabolism);ko01200(Carbon metabolism);ko01110(Biosynthesis of secondary metabolites);ko01100(Metabolic pathways);ko01230(Biosynthesis of amino acids);ko00920(Sulfur metabolism)
PC-3p-12911_938	XM_016085125.2	2427	2447	2438	-28.7	-22.2	0.773519	7.5	2-18,2446-2430	1-1,2447-2447[UP5];19-21,2429-2427[UP3]	...(((((((((((((((((.&.)))))))))))))))))...	UAAGAGCUGCUUGAUUGAAGC&UUUUUAAUUAAGUAGCUCAGC	0	0	NA	NA	NA	0	0	NA	NA	NA	1	26.8255	4	0.494539	Output/S24h/cleaveLand_result/t_plot/PC-3p-12911_938_XM_016085125.2_2438_TPlot.pdf	0	0	26.8255	2.2374e-12	2.55455e-12	yes	GO:0044464(cell part);GO:0044424(intracellular part);GO:0016192(vesicle-mediated transport);GO:0022406(membrane docking);GO:0006904(vesicle docking involved in exocytosis);GO:0032940(secretion by cell);GO:0005623(cell);GO:0000145(exocyst);GO:0043234(protein complex);GO:0051179(localization);GO:0046903(secretion);GO:0006887(exocytosis);GO:0071944(cell periphery);GO:0099023(tethering complex);GO:00…	NA
PC-3p-12911_938	XM_016086461.2	3691	3712	3702	-28.7	-18.9	0.658537	10.5	1-6,3712-3707;9-21,3703-3691	7-8,3706-3704[AILt]	(((((((((((((...((((((&))))))-..)))))))))))))	GUUGAGCUAUUUAUUGUGAGGA&UUUUUA-AUUAAGUAGCUCAGC	0	0	NA	NA	NA	1	33.3045	4	1	Output/S8h/cleaveLand_result/t_plot/PC-3p-12911_938_XM_016086461.2_3702_TPlot.pdf	0	0	NA	NA	NA	0	33.3045	0	3.4347e-15	7.86611e-15	yes	GO:0071704(organic substance metabolic process);GO:0044389(ubiquitin-like protein ligase binding);GO:0019538(protein metabolic process);GO:0005622(intracellular);GO:0003824(catalytic activity);GO:0016740(transferase activity);GO:0044424(intracellular part);GO:0036211(protein modification process);GO:0019899(enzyme binding);GO:0031625(ubiquitin protein ligase binding);GO:0070647(protein modificati…	ko04120(Ubiquitin mediated proteolysis)
PC-3p-12911_938	XM_016086511.1	815	837	828	-28.7	-21.3	0.74216	10	4-16,834-822;17-21,819-815	1-3,837-835[UP5];x-x,821-820[BULt]	(((((..(((((((((((((...&...)))))))))))))--)))))	GCUGAUAGCUACUUGGUUAGCUC&UUUUUAAUUAAGUAGC--UCAGC	12	363.372	2	0.392996	Output/S0h/cleaveLand_result/t_plot/PC-3p-12911_938_XM_016086511.1_828_TPlot.pdf	1	33.3045	4	0.749117	Output/S8h/cleaveLand_result/t_plot/PC-3p-12911_938_XM_016086511.1_828_TPlot.pdf	5	134.127	3	0.150574	Output/S24h/cleaveLand_result/t_plot/PC-3p-12911_938_XM_016086511.1_828_TPlot.pdf	363.372	33.3045	134.127	5.7773e-71	4.35072e-69	yes	GO:0043167(ion binding);GO:0008270(zinc ion binding);GO:0052747(sinapyl alcohol dehydrogenase activity);GO:0008152(metabolic process);GO:0016616(oxidoreductase activity, acting on the CH-OH group of donors, NAD or NADP as acceptor);GO:0043169(cation binding);GO:0016614(oxidoreductase activity, acting on CH-OH group of donors);GO:0046914(transition metal ion binding);GO:0016491(oxidoreductase acti…	ko01100(Metabolic pathways);ko00940(Phenylpropanoid biosynthesis);ko01110(Biosynthesis of secondary metabolites)
PC-3p-12911_938	XM_016087549.2	699	718	710	-28.7	-20.1	0.700348	5	1-8,718-711;10-18,710-702;20-21,700-699	9-9,x-x[BULq];19-19,701-701[SIL]	((.(((((((((-((((((((&)))))))).))))))))).))	GCAGAGCUACUU-AUUGGAAA&UUUUUAAUUAAGUAGCUCAGC	0	0	NA	NA	NA	0	0	NA	NA	NA	1	26.8255	4	0.999885	Output/S24h/cleaveLand_result/t_plot/PC-3p-12911_938_XM_016087549.2_710_TPlot.pdf	0	0	26.8255	2.2374e-12	2.55455e-12	yes	GO:0016301(kinase activity);GO:0032553(ribonucleotide binding);GO:0036211(protein modification process);GO:0043168(anion binding);GO:0019538(protein metabolic process);GO:0008152(metabolic process);GO:0043412(macromolecule modification);GO:0005488(binding);GO:0043170(macromolecule metabolic process);GO:1901265(nucleoside phosphate binding);GO:0006796(phosphate-containing compound metabolic proces…	NA
PC-3p-12911_938	XM_016087626.2	497	518	509	-28.7	-20.2	0.703833	8.5	1-5,518-514;7-18,512-501;20-21,498-497	6-6,513-513[SIL];19-19,500-499[AILt]	((..((((((((((((.(((((&))))).))))))))))))-.))	GCCGGAGCUGCUUGAUGAGGGA&UUUUUAAUUAAGUAGCUC-AGC	0	0	NA	NA	NA	1	33.3045	4	0.998963	Output/S8h/cleaveLand_result/t_plot/PC-3p-12911_938_XM_016087626.2_509_TPlot.pdf	0	0	NA	NA	NA	0	33.3045	0	3.4347e-15	7.86611e-15	yes	NA	NA
PC-3p-12911_938	XM_016090739.2	902	923	914	-28.7	-19.3	0.672474	11	4-13,920-911;14-20,909-903	1-3,923-921[UP5];x-x,910-910[BULt];21-21,902-902[UP3]	.(((((((.((((((((((...&...))))))))))-))))))).	ACUGGGCUGGCUUGGUUGACCG&UUUUUAAUUAAGU-AGCUCAGC	0	0	NA	NA	NA	0	0	NA	NA	NA	1	26.8255	4	1	Output/S24h/cleaveLand_result/t_plot/PC-3p-12911_938_XM_016090739.2_914_TPlot.pdf	0	0	26.8255	2.2374e-12	2.55455e-12	yes	GO:0003824(catalytic activity);GO:0031224(intrinsic component of membrane);GO:0044425(membrane part);GO:0016021(integral component of membrane);GO:0016757(transferase activity, transferring glycosyl groups);GO:0016020(membrane);GO:0016740(transferase activity)	NA
PC-3p-12911_938	XM_016093975.2	1818	1838	1829	-28.7	-19	0.662021	15	8-13,1831-1826;15-21,1824-1818	1-7,1838-1832[UP5];14-14,1825-1825[SIL]	(((((((.((((((.......&.......)))))).)))))))	GCUGAGCAACUUGAAGCAGCA&UUUUUAAUUAAGUAGCUCAGC	0	0	NA	NA	NA	0	0	NA	NA	NA	1	26.8255	4	1	Output/S24h/cleaveLand_result/t_plot/PC-3p-12911_938_XM_016093975.2_1829_TPlot.pdf	0	0	26.8255	2.2374e-12	2.55455e-12	yes	GO:0032549(ribonucleoside binding);GO:0000166(nucleotide binding);GO:0043168(anion binding);GO:0097367(carbohydrate derivative binding);GO:0019001(guanyl nucleotide binding);GO:0036094(small molecule binding);GO:0032555(purine ribonucleotide binding);GO:0005488(binding);GO:0017076(purine nucleotide binding);GO:0001883(purine nucleoside binding);GO:0016787(hydrolase activity);GO:0032550(purine rib…	NA
PC-3p-12911_938	XM_016095046.2	1310	1329	1320	-28.7	-20.4	0.710801	6	1-12,1329-1318;15-21,1316-1310	13-14,1317-1317[AILq]	(((((((.-((((((((((((&))))))))))))..)))))))	GCUGAGCC-UUUGAUUGAAGA&UUUUUAAUUAAGUAGCUCAGC	0	0	NA	NA	NA	2	66.6089	2	0.858276	Output/S8h/cleaveLand_result/t_plot/PC-3p-12911_938_XM_016095046.2_1320_TPlot.pdf	0	0	NA	NA	NA	0	66.6089	0	1.1789e-29	9.89421e-29	yes	GO:0008168(methyltransferase activity);GO:0003824(catalytic activity);GO:0016741(transferase activity, transferring one-carbon groups);GO:0008152(metabolic process);GO:0016740(transferase activity);GO:0032259(methylation);GO:0016021(integral component of membrane);GO:0044425(membrane part);GO:0031224(intrinsic component of membrane);GO:0016020(membrane)	NA
PC-3p-12911_938	XM_016096014.2	978	1002	993	-28.7	-19.3	0.672474	11	1-6,1002-997;9-16,994-987;17-21,982-978	7-8,996-995[SIL];x-x,986-983[BULt]	(((((....((((((((..((((((&))))))..))))))))----)))))	GCUGGUAUUGCUGCUUAUGUGAAGA&UUUUUAAUUAAGUAGC----UCAGC	3	90.843	2	0.997701	Output/S0h/cleaveLand_result/t_plot/PC-3p-12911_938_XM_016096014.2_993_TPlot.pdf	0	0	NA	NA	NA	0	0	NA	NA	NA	90.843	0	0	3.5171e-40	6.21445e-39	yes	GO:0008652(cellular amino acid biosynthetic process);GO:1901605(alpha-amino acid metabolic process);GO:0019842(vitamin binding);GO:0006520(cellular amino acid metabolic process);GO:1901576(organic substance biosynthetic process);GO:0005488(binding);GO:0043168(anion binding);GO:0044238(primary metabolic process);GO:0009097(isoleucine biosynthetic process);GO:1901607(alpha-amino acid biosynthetic p…	ko01100(Metabolic pathways);ko00260(Glycine, serine and threonine metabolism);ko01200(Carbon metabolism);ko01110(Biosynthesis of secondary metabolites);ko01230(Biosynthesis of amino acids);ko00290(Valine, leucine and isoleucine biosynthesis)
PC-3p-12911_938	XM_016096457.2	1794	1819	1810	-28.7	-18.8	0.655052	12	2-13,1818-1807;14-21,1801-1794	1-1,1819-1819[UP5];x-x,1806-1802[BULt]	((((((((.....((((((((((((.&.))))))))))))-----))))))))	GUUGGGCUUCAGUACUUGGUUGAGGC&UUUUUAAUUAAGU-----AGCUCAGC	7	211.967	2	0.999813	Output/S0h/cleaveLand_result/t_plot/PC-3p-12911_938_XM_016096457.2_1810_TPlot.pdf	9	299.74	2	0.999703	Output/S8h/cleaveLand_result/t_plot/PC-3p-12911_938_XM_016096457.2_1810_TPlot.pdf	2	53.6509	3	0.939611	Output/S24h/cleaveLand_result/t_plot/PC-3p-12911_938_XM_016096457.2_1810_TPlot.pdf	211.967	299.74	53.6509	1.403e-36	2.29717e-35	yes	GO:0016830(carbon-carbon lyase activity);GO:0009445(putrescine metabolic process);GO:0009056(catabolic process);GO:0003824(catalytic activity);GO:0044237(cellular metabolic process);GO:0006596(polyamine biosynthetic process);GO:0006595(polyamine metabolic process);GO:0006525(arginine metabolic process);GO:0044281(small molecule metabolic process);GO:0044249(cellular biosynthetic process);GO:19015…	ko01100(Metabolic pathways);ko00330(Arginine and proline metabolism)
PC-3p-12911_938	XM_016097338.2	895	920	907	-28.7	-19.66	0.685017	15.5	1-6,920-915;9-14,908-903;15-21,901-895	7-8,914-909[AILt];x-x,902-902[BULt]	(((((((.((((((......((((((&))))))----..))))))-)))))))	GCUGAGCUUGCUUAUGUGGGUGAAGA&UUUUUA----AUUAAGUA-GCUCAGC	0	0	NA	NA	NA	0	0	NA	NA	NA	2	53.6509	2	0.99039	Output/S24h/cleaveLand_result/t_plot/PC-3p-12911_938_XM_016097338.2_907_TPlot.pdf	0	0	53.6509	5.0035e-24	2.27989e-23	yes	GO:0005355(glucose transmembrane transporter activity);GO:0005215(transporter activity);GO:1904659(glucose transmembrane transport);GO:0015749(monosaccharide transport);GO:0005623(cell);GO:0055085(transmembrane transport);GO:0015144(carbohydrate transmembrane transporter activity);GO:0005402(cation:sugar symporter activity);GO:0015294(solute:cation symporter activity);GO:0015075(ion transmembrane…	NA
PC-3p-12911_938	XM_016100158.2	988	1008	999	-28.7	-19.04	0.663415	12.5	1-5,1008-1004;11-21,998-988	6-10,1003-999[SIL]	(((((((((((.....(((((&))))).....)))))))))))	GCUGAGUUACUCGAAGGAGAA&UUUUUAAUUAAGUAGCUCAGC	1	30.281	4	1	Output/S0h/cleaveLand_result/t_plot/PC-3p-12911_938_XM_016100158.2_999_TPlot.pdf	0	0	NA	NA	NA	5	134.127	2	0.999627	Output/S24h/cleaveLand_result/t_plot/PC-3p-12911_938_XM_016100158.2_999_TPlot.pdf	30.281	0	134.127	6.0586e-40	1.06002e-38	yes	NA	NA
PC-3p-12911_938	XM_016101082.2	1413	1435	1426	-28.7	-19.2	0.66899	8	2-14,1434-1422;15-16,1420-1419;17-21,1417-1413	1-1,1435-1435[UP5];x-x,1421-1421[BULt];x-x,1418-1418[BULt]	(((((.((.(((((((((((((.&.)))))))))))))-))-)))))	GUUGAUGCAUGCUUGGUUGAGAC&UUUUUAAUUAAGUA-GC-UCAGC	0	0	NA	NA	NA	0	0	NA	NA	NA	1	26.8255	4	1	Output/S24h/cleaveLand_result/t_plot/PC-3p-12911_938_XM_016101082.2_1426_TPlot.pdf	0	0	26.8255	2.2374e-12	2.55455e-12	yes	GO:0008270(zinc ion binding);GO:0005488(binding);GO:0046872(metal ion binding);GO:0043167(ion binding);GO:0043169(cation binding);GO:0046914(transition metal ion binding)	ko03008(Ribosome biogenesis in eukaryotes)
[truncated: 24,464 more rows]
