# Supplementary material for: Integration of Small RNA and Degradome Sequencing Reveals the Regulatory Network of Al-Induced Programmed Cell Death in Peanut
Source: Int J Mol Sci. 2021 Dec 27;23(1):246. doi: 10.3390/ijms23010246 (PMC8745729; doi:10.3390/ijms23010246)
Supplement: Supplementary file 1 [file ijms-23-00246-s001.zip › Table S5-6 The predicted targets of known and novel miRNAs in S8hvsS0h.xlsx]

## Sheet: S0hvsS8h
Table S5-6 The predicted targets of known and novel miRNAs in S8hvsS0h
Item	Description
TStart	Start position of mRNA and miRNA alignment region
TStop	End position of mRNA and miRNA alignment region
TSlice	Degradation site
AllenScore	Penalty score of mismatched bases between the miRNA and its target (the lower the value, the better)
Paired	Paired position (format is miRNA (5 '- 3'), mRNA (3 '- 5'), " ;" for segmentation.)
Unpaired	Unpaired position
Structure	Secondary structure
DegradomeCategory	Category 0:over one raw read at the position, abundance at the position is equal to the maximum on the transcript, and there is only one maximum on the transcript
	Category 1:over one raw read at the position, abundance at the position is equal to the maximum on the transcript, and there is more than one maximum position on the transcript
	Category 2:over one raw read at the position, abundance at position is less than the maximum but higher than the median for the transcript
	Category 3:over one raw read at the position, abundance at the position is equal to or less than the median for the transcript
	Category 4:only one raw read at the position
Query	Transcript	TStart	TStop	TSlice	MFEperfect	MFEsite	MFEratio	AllenScore	Paired	Unpaired	Structure	Sequence	DegradomeRawReads(S8h)	DegradomeNormReads(S8h)	DegradomeCategory(S8h)	DegradomePval(S8h)	Tplot_file_path(S8h)	DegradomeRawReads(S0h)	DegradomeNormReads(S0h)	DegradomeCategory(S0h)	DegradomePval(S0h)	Tplot_file_path(S0h)	S8h	S0h	log2(fold_change)	regulation	pvalue	qvalue	significant	GO	KEGG
PC-3p-100264_81	BGI_novel_T000262	2187	2217	2201	-52.3	-34.3	0.655832	19	1-8,2217-2210;9-9,2202-2202;11-16,2200-2195;19-24,2192-2187	x-x,2209-2203[BULt];10-10,2201-2201[SIL];17-18,2194-2193[SIL]	((((((..((((((.(.......((((((((&))))))))-------).))))))..))))))	GGCUACCAGCCAGGGUGUUGCAAGAGGCCAA&UUGGCCUU-------AGCCUGGCCUGUAGCC	1	33.3045	4	0.978273	Output/S8h/cleaveLand_result/t_plot/PC-3p-100264_81_BGI_novel_T000262_2201_TPlot.pdf	0	0	NA	NA	NA	33.3045	0	Inf	up	7.8779e-09	1.42259e-08	yes	GO:0016788(hydrolase activity, acting on ester bonds);GO:0008081(phosphoric diester hydrolase activity);GO:0005488(binding);GO:0006793(phosphorus metabolic process);GO:0043169(cation binding);GO:0097164(ammonium ion metabolic process);GO:0009056(catabolic process);GO:0071704(organic substance metabolic process);GO:0042578(phosphoric ester hydrolase activity);GO:0044255(cellular lipid metabolic pr…	ko01100(Metabolic pathways);ko00565(Ether lipid metabolism);ko01110(Biosynthesis of secondary metabolites);ko04144(Endocytosis);ko00564(Glycerophospholipid metabolism)
PC-3p-100264_81	BGI_novel_T007847	2913	2944	2935	-52.3	-35.8	0.684512	10.5	1-14,2944-2931;15-16,2928-2927;17-18,2925-2924;19-24,2918-2913	x-x,2930-2929[BULt];x-x,2926-2926[BULt];x-x,2923-2919[BULt]	((((((.....((.((..((((((((((((((&))))))))))))))--))-))-----))))))	GGCUAUGAAAUGGAGCAUCAGGCUGAGGCCAG&UUGGCCUUAGCCUG--GC-CU-----GUAGCC	2	66.6089	2	0.353258	Output/S8h/cleaveLand_result/t_plot/PC-3p-100264_81_BGI_novel_T007847_2935_TPlot.pdf	0	0	NA	NA	NA	66.6089	0	Inf	up	3.3071e-16	2.0359e-15	yes	GO:0044238(primary metabolic process);GO:0044260(cellular macromolecule metabolic process);GO:0043231(intracellular membrane-bounded organelle);GO:0016311(dephosphorylation);GO:0043226(organelle);GO:0005622(intracellular);GO:0044267(cellular protein metabolic process);GO:0043412(macromolecule modification);GO:0005623(cell);GO:0004721(phosphoprotein phosphatase activity);GO:0003824(catalytic activ…	ko03013(RNA transport);ko03040(Spliceosome);ko03015(mRNA surveillance pathway)
PC-3p-100264_81	XM_016078049.2	565	593	584	-52.3	-36.5	0.697897	11.5	1-2,593-592;4-17,590-577;18-20,571-569;22-24,567-565	3-3,591-591[SIL];x-x,576-572[BULt];21-21,568-568[SIL]	(((.(((.....((((((((((((((.((&)).))))))))))))))-----))).)))	GGUAACAGGAUCGGCCAGGCUGGGGCGGA&UUGGCCUUAGCCUGGCC-----UGUAGCC	1	33.3045	4	0.607817	Output/S8h/cleaveLand_result/t_plot/PC-3p-100264_81_XM_016078049.2_584_TPlot.pdf	0	0	NA	NA	NA	33.3045	0	Inf	up	7.8779e-09	1.42259e-08	yes	NA	ko01100(Metabolic pathways);ko00790(Folate biosynthesis)
PC-3p-100264_81	XM_016078383.2	1779	1801	1792	-52.3	-36	0.688337	5.5	1-9,1801-1793;11-18,1791-1784;20-21,1782-1781;23-24,1780-1779	10-10,1792-1792[SIL];19-19,1783-1783[SIL];22-22,x-x[BULq]	((-((.((((((((.(((((((((&))))))))).)))))))).)).))	GG-UAGAGGCCGGGGUAAGGCUAA&UUGGCCUUAGCCUGGCCUGUAGCC	0	0	NA	NA	NA	1	30.281	4	0.694281	Output/S0h/cleaveLand_result/t_plot/PC-3p-100264_81_XM_016078383.2_1792_TPlot.pdf	0	30.281	-Inf	down	3.7368e-08	4.29087e-08	yes	NA	ko04120(Ubiquitin mediated proteolysis)
PC-3p-100264_81	XM_016079178.2	576	601	592	-52.3	-38.5	0.736138	8.5	2-2,600-600;4-13,598-589;14-20,587-581;22-24,578-576	1-1,601-601[UP5];3-3,599-599[SIL];x-x,588-588[BULt];21-21,580-579[AILt]	(((..(((((((.((((((((((.(.&.).))))))))))-)))))))-.)))	GGCGGGCGGGCCUGGGCUAGGGCGAC&UUGGCCUUAGCCU-GGCCUGU-AGCC	0	0	NA	NA	NA	1	30.281	4	0.235338	Output/S0h/cleaveLand_result/t_plot/PC-3p-100264_81_XM_016079178.2_592_TPlot.pdf	0	30.281	-Inf	down	3.7368e-08	4.29087e-08	yes	GO:0016021(integral component of membrane);GO:0016020(membrane);GO:0044425(membrane part);GO:0031224(intrinsic component of membrane)	NA
PC-3p-100264_81	XM_016087415.2	1036	1058	1050	-52.3	-34.3	0.655832	9.5	2-8,1057-1051;11-12,1049-1048;14-23,1046-1037	1-1,1058-1058[UP5];9-10,1050-1050[AILq];13-13,1047-1047[SIL];24-24,1036-1036[UP3]	.((((((((((.((.-(((((((.&.)))))))..)).)))))))))).	AGCUGCGGGCUUGGG-GAGGCCAU&UUGGCCUUAGCCUGGCCUGUAGCC	0	0	NA	NA	NA	1	30.281	4	0.984377	Output/S0h/cleaveLand_result/t_plot/PC-3p-100264_81_XM_016087415.2_1050_TPlot.pdf	0	30.281	-Inf	down	3.7368e-08	4.29087e-08	yes	NA	ko00750(Vitamin B6 metabolism)
PC-3p-100264_81	XM_016095616.2	565	589	580	-52.3	-36.1	0.690249	9.5	1-8,589-582;11-18,579-572;20-23,569-566	9-10,581-580[SIL];19-19,571-570[AILt];24-24,565-565[UP3]	.((((..((((((((..((((((((&))))))))..))))))))-.)))).	AGCUAAAGGGCCAGGAGGAGGCCGA&UUGGCCUUAGCCUGGCCU-GUAGCC	1	33.3045	4	0.662078	Output/S8h/cleaveLand_result/t_plot/PC-3p-100264_81_XM_016095616.2_580_TPlot.pdf	0	0	NA	NA	NA	33.3045	0	Inf	up	7.8779e-09	1.42259e-08	yes	GO:0071704(organic substance metabolic process);GO:0090304(nucleic acid metabolic process);GO:0006396(RNA processing);GO:0008152(metabolic process);GO:0044237(cellular metabolic process);GO:0043170(macromolecule metabolic process);GO:0044260(cellular macromolecule metabolic process);GO:0034641(cellular nitrogen compound metabolic process);GO:0006725(cellular aromatic compound metabolic process);G…	ko03040(Spliceosome);ko03018(RNA degradation)
PC-3p-100264_81	XM_016099536.2	7829	7853	7843	-52.3	-34.1	0.652008	9	1-5,7853-7849;6-14,7847-7839;16-21,7837-7832;23-24,7830-7829	x-x,7848-7848[BULt];15-15,7838-7838[SIL];22-22,7831-7831[SIL]	((.((((((.(((((((((.(((((&)))))-))))))))).)))))).))	GGGUGCAGGGCAGGUUGAGUGUUAG&UUGGC-CUUAGCCUGGCCUGUAGCC	0	0	NA	NA	NA	2	60.562	2	0.800684	Output/S0h/cleaveLand_result/t_plot/PC-3p-100264_81_XM_016099536.2_7843_TPlot.pdf	0	60.562	-Inf	down	7.123e-15	2.99612e-14	yes	NA	NA
PC-3p-100264_81	XM_016099540.2	7816	7840	7830	-52.3	-34.1	0.652008	9	1-5,7840-7836;6-14,7834-7826;16-21,7824-7819;23-24,7817-7816	x-x,7835-7835[BULt];15-15,7825-7825[SIL];22-22,7818-7818[SIL]	((.((((((.(((((((((.(((((&)))))-))))))))).)))))).))	GGGUGCAGGGCAGGUUGAGUGUUAG&UUGGC-CUUAGCCUGGCCUGUAGCC	0	0	NA	NA	NA	1	30.281	4	0.991067	Output/S0h/cleaveLand_result/t_plot/PC-3p-100264_81_XM_016099540.2_7830_TPlot.pdf	0	30.281	-Inf	down	3.7368e-08	4.29087e-08	yes	NA	NA
PC-3p-100264_81	XM_016100348.2	746	775	761	-52.3	-35.8	0.684512	15.5	2-7,774-769;8-9,763-762;11-14,760-757;15-24,755-746	1-1,775-775[UP5];x-x,768-764[BULt];10-10,761-761[SIL];x-x,756-756[BULt]	((((((((((.((((.((.....((((((.&.))))))-----)).))))-))))))))))	GGCUGCGGGUACAGGGUACUGGAAGGCCAC&UUGGCCU-----UAGCCUG-GCCUGUAGCC	1	33.3045	4	0.714961	Output/S8h/cleaveLand_result/t_plot/PC-3p-100264_81_XM_016100348.2_761_TPlot.pdf	0	0	NA	NA	NA	33.3045	0	Inf	up	7.8779e-09	1.42259e-08	yes	GO:0071704(organic substance metabolic process);GO:0044271(cellular nitrogen compound biosynthetic process);GO:1901360(organic cyclic compound metabolic process);GO:0044260(cellular macromolecule metabolic process);GO:0034654(nucleobase-containing compound biosynthetic process);GO:0008152(metabolic process);GO:0034641(cellular nitrogen compound metabolic process);GO:0009059(macromolecule biosynth…	ko03015(mRNA surveillance pathway);ko03018(RNA degradation);ko04120(Ubiquitin mediated proteolysis);ko00561(Glycerolipid metabolism);ko03013(RNA transport);ko01100(Metabolic pathways);ko04141(Protein processing in endoplasmic reticulum)
PC-3p-100264_81	XM_016102391.2	826	851	840	-52.3	-34.9	0.667304	12.5	3-6,849-846;7-23,843-827	1-2,851-850[UP5];x-x,845-844[BULt];24-24,826-826[UP3]	.(((((((((((((((((..((((..&..))))--))))))))))))))))).	UGUUGCGGGCCAGGUUGAUCGGUCUC&UUGGCC--UUAGCCUGGCCUGUAGCC	0	0	NA	NA	NA	3	90.843	2	0.622958	Output/S0h/cleaveLand_result/t_plot/PC-3p-100264_81_XM_016102391.2_840_TPlot.pdf	0	90.843	-Inf	down	1.5521e-21	1.73737e-20	yes	GO:0043168(anion binding);GO:1901363(heterocyclic compound binding);GO:1901265(nucleoside phosphate binding);GO:0016491(oxidoreductase activity);GO:0097367(carbohydrate derivative binding);GO:0055114(oxidation-reduction process);GO:0010181(FMN binding);GO:0043167(ion binding);GO:0008152(metabolic process);GO:0003824(catalytic activity);GO:0032553(ribonucleotide binding);GO:0048037(cofactor bindin…	ko01110(Biosynthesis of secondary metabolites);ko04146(Peroxisome);ko00630(Glyoxylate and dicarboxylate metabolism);ko01100(Metabolic pathways);ko01200(Carbon metabolism)
PC-3p-100264_81	XM_016102694.2	2127	2150	2142	-52.3	-34	0.650096	9.5	3-7,2148-2144;9-13,2143-2139;15-23,2136-2128	1-2,2150-2149[UP5];8-8,x-x[BULq];14-14,2138-2137[AILt];24-24,2127-2127[UP3]	.(((((((((..(((((-(((((..&..))))).)))))-.))))))))).	UGCUACAGGCAUGGGCU-AGGCUUU&UUGGCCUUAGCCU-GGCCUGUAGCC	5	166.522	2	0.799156	Output/S8h/cleaveLand_result/t_plot/PC-3p-100264_81_XM_016102694.2_2142_TPlot.pdf	0	0	NA	NA	NA	166.522	0	Inf	up	4.2241e-38	2.031e-36	yes	GO:0033365(protein localization to organelle);GO:0051179(localization);GO:0051169(nuclear transport);GO:0046907(intracellular transport);GO:0043229(intracellular organelle);GO:0070013(intracellular organelle lumen);GO:0031090(organelle membrane);GO:0042277(peptide binding);GO:0008565(protein transporter activity);GO:0006913(nucleocytoplasmic transport);GO:0031267(small GTPase binding);GO:0005635(…	NA
PC-3p-100264_81	XM_016103586.2	1592	1615	1607	-52.3	-34.38	0.657361	7.5	1-8,1615-1608;10-15,1607-1602;16-17,1600-1599;21-24,1595-1592	9-9,x-x[BULq];x-x,1601-1601[BULt];18-20,1598-1596[SIL]	((((...((.((((((-((((((((&)))))))).))))))-))...))))	GGCUUGUGGUCCGGGC-AGGGCCAA&UUGGCCUUAGCCUGG-CCUGUAGCC	3	99.9134	2	0.706983	Output/S8h/cleaveLand_result/t_plot/PC-3p-100264_81_XM_016103586.2_1607_TPlot.pdf	1	30.281	4	0.977151	Output/S0h/cleaveLand_result/t_plot/PC-3p-100264_81_XM_016103586.2_1607_TPlot.pdf	99.9134	30.281	1.72227	up	1.0422e-09	4.10813e-09	yes	GO:0003824(catalytic activity);GO:0005886(plasma membrane);GO:0005623(cell);GO:0001871(pattern binding);GO:0044464(cell part);GO:0016021(integral component of membrane);GO:0030246(carbohydrate binding);GO:0016798(hydrolase activity, acting on glycosyl bonds);GO:0044425(membrane part);GO:0044459(plasma membrane part);GO:0030247(polysaccharide binding);GO:0071704(organic substance metabolic process…	ko00500(Starch and sucrose metabolism)
PC-3p-100264_81	XM_016113267.2	2913	2944	2935	-52.3	-35.8	0.684512	10.5	1-14,2944-2931;15-16,2928-2927;17-18,2925-2924;19-24,2918-2913	x-x,2930-2929[BULt];x-x,2926-2926[BULt];x-x,2923-2919[BULt]	((((((.....((.((..((((((((((((((&))))))))))))))--))-))-----))))))	GGCUAUGAAAUGGAGCAUCAGGCUGAGGCCAG&UUGGCCUUAGCCUG--GC-CU-----GUAGCC	1	33.3045	4	0.774432	Output/S8h/cleaveLand_result/t_plot/PC-3p-100264_81_XM_016113267.2_2935_TPlot.pdf	1	30.281	4	0.790956	Output/S0h/cleaveLand_result/t_plot/PC-3p-100264_81_XM_016113267.2_2935_TPlot.pdf	33.3045	30.281	0.137303	up	0.70456	0.704918	yes	GO:0044238(primary metabolic process);GO:0044260(cellular macromolecule metabolic process);GO:0043231(intracellular membrane-bounded organelle);GO:0016311(dephosphorylation);GO:0043226(organelle);GO:0005622(intracellular);GO:0044267(cellular protein metabolic process);GO:0043412(macromolecule modification);GO:0005623(cell);GO:0004721(phosphoprotein phosphatase activity);GO:0003824(catalytic activ…	ko03013(RNA transport);ko03040(Spliceosome);ko03015(mRNA surveillance pathway)
PC-3p-100264_81	XM_016114588.2	476	499	490	-52.3	-34.6	0.661568	8.5	1-11,499-489;12-13,487-486;15-18,484-481;22-24,478-476	x-x,488-488[BULt];14-14,485-485[SIL];19-21,480-479[AILq]	(((..-((((.((.(((((((((((&)))))))))))-)).))))...)))	GGCGA-GGGCGGGCGUUAAGGCCAG&UUGGCCUUAGC-CUGGCCUGUAGCC	0	0	NA	NA	NA	1	30.281	4	0.964266	Output/S0h/cleaveLand_result/t_plot/PC-3p-100264_81_XM_016114588.2_490_TPlot.pdf	0	30.281	-Inf	down	3.7368e-08	4.29087e-08	yes	GO:0046395(carboxylic acid catabolic process);GO:0045548(phenylalanine ammonia-lyase activity);GO:0003824(catalytic activity);GO:0044424(intracellular part);GO:0016840(carbon-nitrogen lyase activity);GO:0009698(phenylpropanoid metabolic process);GO:0006807(nitrogen compound metabolic process);GO:0008152(metabolic process);GO:1901564(organonitrogen compound metabolic process);GO:0009063(cellular a…	ko01100(Metabolic pathways);ko00360(Phenylalanine metabolism);ko00940(Phenylpropanoid biosynthesis);ko01110(Biosynthesis of secondary metabolites)
PC-3p-100264_81	XM_016117982.2	482	506	496	-52.3	-34	0.650096	9	3-6,504-501;7-13,499-493;14-19,491-486;21-24,485-482	1-2,506-505[UP5];x-x,500-500[BULt];x-x,492-492[BULt];20-20,x-x[BULq]	((((-((((((.(((((((.((((..&..))))-)))))))-)))))).))))	GGUU-CGGGCCGAGGCUAACGGCUCC&UUGGCC-UUAGCCU-GGCCUGUAGCC	0	0	NA	NA	NA	2	60.562	2	0.822373	Output/S0h/cleaveLand_result/t_plot/PC-3p-100264_81_XM_016117982.2_496_TPlot.pdf	0	60.562	-Inf	down	7.123e-15	2.99612e-14	yes	GO:0005488(binding);GO:0097159(organic cyclic compound binding);GO:1901363(heterocyclic compound binding)	ko03040(Spliceosome)
PC-3p-100264_81	XM_021127228.1	482	506	496	-52.3	-34	0.650096	9	3-6,504-501;7-13,499-493;14-19,491-486;21-24,485-482	1-2,506-505[UP5];x-x,500-500[BULt];x-x,492-492[BULt];20-20,x-x[BULq]	((((-((((((.(((((((.((((..&..))))-)))))))-)))))).))))	GGUU-CGGGCCGAGGCUAACGGCUCC&UUGGCC-UUAGCCU-GGCCUGUAGCC	0	0	NA	NA	NA	1	30.281	4	0.993612	Output/S0h/cleaveLand_result/t_plot/PC-3p-100264_81_XM_021127228.1_496_TPlot.pdf	0	30.281	-Inf	down	3.7368e-08	4.29087e-08	yes	GO:0005488(binding);GO:0097159(organic cyclic compound binding);GO:1901363(heterocyclic compound binding)	ko03040(Spliceosome)
PC-3p-100264_81	XM_021132109.1	2326	2352	2341	-52.3	-35.2	0.67304	10.5	1-5,2352-2348;6-8,2346-2344;10-13,2341-2338;14-20,2336-2330;22-24,2328-2326	x-x,2347-2347[BULt];9-9,2343-2342[AILt];x-x,2337-2337[BULt];21-21,2329-2329[SIL]	(((.(((((((.((((..(((.(((((&)))))-)))-.))))-))))))).)))	GGCAGCAGGCCGAGGCCGGGGAGCCAA&UUGGC-CUU-AGCCU-GGCCUGUAGCC	0	0	NA	NA	NA	1	30.281	4	0.906536	Output/S0h/cleaveLand_result/t_plot/PC-3p-100264_81_XM_021132109.1_2341_TPlot.pdf	0	30.281	-Inf	down	3.7368e-08	4.29087e-08	yes	GO:0032559(adenyl ribonucleotide binding);GO:0097159(organic cyclic compound binding);GO:0000166(nucleotide binding);GO:0006468(protein phosphorylation);GO:0071704(organic substance metabolic process);GO:0016740(transferase activity);GO:0006464(cellular protein modification process);GO:0006793(phosphorus metabolic process);GO:0044267(cellular protein metabolic process);GO:1901564(organonitrogen c…	NA
PC-3p-100264_81	XM_021142147.1	745	772	762	-52.3	-36.5	0.697897	10	1-6,772-767;8-20,764-752;21-24,748-745	7-7,766-765[AILt];x-x,751-749[BULt]	((((...(((((((((((((..((((((&))))))-.)))))))))))))---))))	GGCUGAAACAGGUCGGGCUGCUGGUCAA&UUGGCC-UUAGCCUGGCCUGU---AGCC	0	0	NA	NA	NA	1	30.281	4	0.60019	Output/S0h/cleaveLand_result/t_plot/PC-3p-100264_81_XM_021142147.1_762_TPlot.pdf	0	30.281	-Inf	down	3.7368e-08	4.29087e-08	yes	NA	NA
PC-3p-101862_79	BGI_novel_T011691	1063	1086	1077	-45.4	-31.2	0.687225	8	1-1,1086-1086;3-4,1084-1083;6-15,1081-1072;18-24,1069-1063	2-2,1085-1085[SIL];5-5,1082-1082[SIL];16-17,1071-1070[SIL]	(((((((..((((((((((.((.(&).)).))))))))))..)))))))	GGGUGGAGGUGGGUGCAGUGGAGU&AGUCGACUGCACCUGAAUUCACCU	0	0	NA	NA	NA	3	90.843	2	0.292214	Output/S0h/cleaveLand_result/t_plot/PC-3p-101862_79_BGI_novel_T011691_1077_TPlot.pdf	0	90.843	-Inf	down	1.5521e-21	1.73737e-20	yes	NA	ko00860(Porphyrin and chlorophyll metabolism);ko00053(Ascorbate and aldarate metabolism);ko00040(Pentose and glucuronate interconversions);ko01110(Biosynthesis of secondary metabolites);ko01100(Metabolic pathways);ko00906(Carotenoid biosynthesis)
PC-3p-101862_79	XM_016096771.2	852	878	866	-45.4	-31.5	0.693833	14	1-4,878-875;7-8,872-871;9-23,867-853	5-6,874-873[SIL];x-x,870-868[BULt];24-24,852-852[UP3]	.(((((((((((((((...((..((((&))))..))---))))))))))))))).	CGGUGGAUUCGGGUGCUGCGGAGGGCU&AGUCGACU---GCACCUGAAUUCACCU	1	33.3045	4	0.599385	Output/S8h/cleaveLand_result/t_plot/PC-3p-101862_79_XM_016096771.2_866_TPlot.pdf	1	30.281	4	0.617676	Output/S0h/cleaveLand_result/t_plot/PC-3p-101862_79_XM_016096771.2_866_TPlot.pdf	33.3045	30.281	0.137303	up	0.70456	0.704918	yes	GO:0044260(cellular macromolecule metabolic process);GO:0006470(protein dephosphorylation);GO:1901564(organonitrogen compound metabolic process);GO:0006807(nitrogen compound metabolic process);GO:0008152(metabolic process);GO:0006796(phosphate-containing compound metabolic process);GO:0016787(hydrolase activity);GO:0009987(cellular process);GO:0044237(cellular metabolic process);GO:0044238(primar…	NA
PC-3p-104925_76	XM_016098876.1	625	647	639	-36.9	-25.9	0.701897	8.5	3-9,645-639;11-13,638-636;16-24,633-625	1-2,647-646[UP5];10-10,x-x[BULq];14-15,635-634[SIL]	(((((((((..(((-(((((((..&..))))))).)))..)))))))))	GAACUCAGGCUCAG-CAGUUUCGG&AUGAAAUUGACUGUACCUGAGUUU	0	0	NA	NA	NA	2	60.562	2	0.525261	Output/S0h/cleaveLand_result/t_plot/PC-3p-104925_76_XM_016098876.1_639_TPlot.pdf	0	60.562	-Inf	down	7.123e-15	2.99612e-14	yes	GO:0016310(phosphorylation);GO:0031224(intrinsic component of membrane);GO:0071704(organic substance metabolic process);GO:0004672(protein kinase activity);GO:0044260(cellular macromolecule metabolic process);GO:0043170(macromolecule metabolic process);GO:0004714(transmembrane receptor protein tyrosine kinase activity);GO:0044425(membrane part);GO:0016773(phosphotransferase activity, alcohol grou…	NA
PC-3p-105086_75	XM_016088691.2	1028	1053	1043	-41.8	-27.2	0.650718	7	1-3,1053-1051;4-16,1049-1037;17-19,1035-1033;21-23,1031-1029	x-x,1050-1050[BULt];x-x,1036-1036[BULt];20-20,1032-1032[SIL];24-24,1028-1028[UP3]	.(((.(((.(((((((((((((.(((&)))-)))))))))))))-))).))).	UACUAAGGUUGUAGUUGACUUCAAUG&CGU-GAAGUCGACUACA-CCUAAGUU	0	0	NA	NA	NA	1	30.281	4	0.642481	Output/S0h/cleaveLand_result/t_plot/PC-3p-105086_75_XM_016088691.2_1043_TPlot.pdf	0	30.281	-Inf	down	3.7368e-08	4.29087e-08	yes	GO:0034641(cellular nitrogen compound metabolic process);GO:0046483(heterocycle metabolic process);GO:0006366(transcription from RNA polymerase II promoter);GO:0009058(biosynthetic process);GO:0006367(transcription initiation from RNA polymerase II promoter);GO:0003723(RNA binding);GO:0009059(macromolecule biosynthetic process);GO:1901576(organic substance biosynthetic process);GO:0003677(DNA bin…	ko03022(Basal transcription factors)
PC-3p-105086_75	XM_016102202.2	290	314	305	-41.8	-29.3	0.700957	5.5	2-7,313-308;9-15,306-300;16-24,298-290	1-1,314-314[UP5];8-8,307-307[SIL];x-x,299-299[BULt]	(((((((((.(((((((.((((((.&.)))))).)))))))-)))))))))	AAUUUGGGUGGUGGUCGCCUUCACC&CGUGAAGUCGACUAC-ACCUAAGUU	1	33.3045	4	0.482877	Output/S8h/cleaveLand_result/t_plot/PC-3p-105086_75_XM_016102202.2_305_TPlot.pdf	0	0	NA	NA	NA	33.3045	0	Inf	up	7.8779e-09	1.42259e-08	yes	GO:0045735(nutrient reservoir activity)	NA
PC-3p-1060_9765	BGI_novel_T002090	361	378	372	-37	-25.22	0.681622	11	1-2,378-377;8-21,374-361	3-7,376-375[AILq]	((((((((((((((..---((&)).....))))))))))))))	UGGCUGUUCUUCUGUU---GG&CCUAUUUCGGAAGAACAGCCA	0	0	NA	NA	NA	3	90.843	2	0.402248	Output/S0h/cleaveLand_result/t_plot/PC-3p-1060_9765_BGI_novel_T002090_372_TPlot.pdf	0	90.843	-Inf	down	1.5521e-21	1.73737e-20	yes	GO:0017171(serine hydrolase activity);GO:0019538(protein metabolic process);GO:0070011(peptidase activity, acting on L-amino acid peptides);GO:0044260(cellular macromolecule metabolic process);GO:0008152(metabolic process);GO:0008236(serine-type peptidase activity);GO:1901565(organonitrogen compound catabolic process);GO:0004185(serine-type carboxypeptidase activity);GO:0044238(primary metabolic …	NA
PC-3p-1060_9765	BGI_novel_T005114	641	662	652	-37	-24.2	0.654054	7	3-8,660-655;9-19,653-643	1-2,662-661[UP5];x-x,654-654[BULt];20-21,642-641[UP3]	..(((((((((((.((((((..&..))))))-)))))))))))..	UCGCUGUUCUUCCAGAAAUACU&CCUAUUUC-GGAAGAACAGCCA	0	0	NA	NA	NA	1	30.281	4	0.991264	Output/S0h/cleaveLand_result/t_plot/PC-3p-1060_9765_BGI_novel_T005114_652_TPlot.pdf	0	30.281	-Inf	down	3.7368e-08	4.29087e-08	yes	NA	NA
PC-3p-1060_9765	XM_016080955.2	1075	1094	1085	-37	-25.6	0.691892	6.5	1-3,1094-1092;5-14,1090-1081;16-20,1080-1076	4-4,1091-1091[SIL];15-15,x-x[BULq];21-21,1075-1075[UP3]	.(((((-((((((((((.(((&))).)))))))))).))))).	CGGCUG-UUUUCCGGAGGAGG&CCUAUUUCGGAAGAACAGCCA	0	0	NA	NA	NA	1	30.281	4	0.680299	Output/S0h/cleaveLand_result/t_plot/PC-3p-1060_9765_XM_016080955.2_1085_TPlot.pdf	0	30.281	-Inf	down	3.7368e-08	4.29087e-08	yes	GO:0080090(regulation of primary metabolic process);GO:0003700(DNA binding transcription factor activity);GO:0031323(regulation of cellular metabolic process);GO:0019222(regulation of metabolic process);GO:1901363(heterocyclic compound binding);GO:0010556(regulation of macromolecule biosynthetic process);GO:0003677(DNA binding);GO:0050789(regulation of biological process);GO:0006355(regulation of…	ko04626(Plant-pathogen interaction);ko04016(MAPK signaling pathway - plant)
PC-3p-1060_9765	XM_016082100.2	414	442	425	-37	-26.1	0.705405	18.5	1-6,442-437;7-8,429-428;9-21,426-414	x-x,436-430[BULt];x-x,427-427[BULt]	(((((((((((((.((.......((((((&))))))-------))-)))))))))))))	UGGCUGUUUUUCCUGAAUCACUGGAUGGG&CCUAUU-------UC-GGAAGAACAGCCA	0	0	NA	NA	NA	1	30.281	4	0.402071	Output/S0h/cleaveLand_result/t_plot/PC-3p-1060_9765_XM_016082100.2_425_TPlot.pdf	0	30.281	-Inf	down	3.7368e-08	4.29087e-08	yes	NA	NA
PC-3p-1060_9765	XM_016101782.2	488	511	501	-37	-25.78	0.696757	7	1-9,511-503;10-13,501-498;16-21,493-488	x-x,502-502[BULt];14-15,497-494[AILt]	((((((....((((.(((((((((&)))))))))-))))--..))))))	UGGCUGGCGGCUUCUUGAAAUAGG&CCUAUUUCG-GAAG--AACAGCCA	0	0	NA	NA	NA	7	211.967	2	0.264505	Output/S0h/cleaveLand_result/t_plot/PC-3p-1060_9765_XM_016101782.2_501_TPlot.pdf	0	211.967	-Inf	down	5.0561e-48	3.67645e-46	yes	NA	NA
PC-3p-1060_9765	XM_016102850.2	1199	1221	1212	-37	-24.9	0.672973	5.5	2-17,1220-1205;18-20,1202-1200	1-1,1221-1221[UP5];x-x,1204-1203[BULt];21-21,1199-1199[UP3]	.(((..((((((((((((((((.&.))))))))))))))))--))).	AGGCCCUGUUUUUCUGAAAUAGA&CCUAUUUCGGAAGAACA--GCCA	1	33.3045	4	0.905706	Output/S8h/cleaveLand_result/t_plot/PC-3p-1060_9765_XM_016102850.2_1212_TPlot.pdf	1	30.281	4	0.916422	Output/S0h/cleaveLand_result/t_plot/PC-3p-1060_9765_XM_016102850.2_1212_TPlot.pdf	33.3045	30.281	0.137303	up	0.70456	0.704918	yes	GO:0006807(nitrogen compound metabolic process);GO:0030554(adenyl nucleotide binding);GO:0008152(metabolic process);GO:0016773(phosphotransferase activity, alcohol group as acceptor);GO:0043167(ion binding);GO:0071704(organic substance metabolic process);GO:0032559(adenyl ribonucleotide binding);GO:1901564(organonitrogen compound metabolic process);GO:0044260(cellular macromolecule metabolic proc…	ko03008(Ribosome biogenesis in eukaryotes)
PC-3p-1060_9765	XM_016109283.2	1202	1225	1215	-37	-25.1	0.678378	10	1-3,1225-1223;5-16,1220-1209;18-20,1205-1203	4-4,1222-1221[AILt];17-17,1208-1206[AILt];21-21,1202-1202[UP3]	.(((...((((((((((((..(((&)))-.))))))))))))--.))).	CGGCGACGUUCUUCCGGAGAGAGG&CCU-AUUUCGGAAGAAC--AGCCA	0	0	NA	NA	NA	1	30.281	4	0.836538	Output/S0h/cleaveLand_result/t_plot/PC-3p-1060_9765_XM_016109283.2_1215_TPlot.pdf	0	30.281	-Inf	down	3.7368e-08	4.29087e-08	yes	NA	ko03015(mRNA surveillance pathway)
PC-3p-1060_9765	XM_016112562.2	114	137	128	-37	-24.24	0.655135	6	2-15,136-123;17-21,118-114	1-1,137-137[UP5];16-16,122-119[AILt]	(((((....((((((((((((((.&.))))))))))))))---.)))))	UGGCUUCACUUCUUCUGAAAUAGA&CCUAUUUCGGAAGAA---CAGCCA	1	33.3045	4	0.98696	Output/S8h/cleaveLand_result/t_plot/PC-3p-1060_9765_XM_016112562.2_128_TPlot.pdf	0	0	NA	NA	NA	33.3045	0	Inf	up	7.8779e-09	1.42259e-08	yes	GO:0006793(phosphorus metabolic process);GO:0016787(hydrolase activity);GO:0006796(phosphate-containing compound metabolic process);GO:0005488(binding);GO:0005623(cell);GO:0005622(intracellular);GO:0003824(catalytic activity);GO:0009987(cellular process);GO:0016817(hydrolase activity, acting on acid anhydrides);GO:0044237(cellular metabolic process);GO:0044424(intracellular part);GO:0046872(metal…	ko00190(Oxidative phosphorylation)
PC-3p-1060_9765	XM_021129416.1	1110	1129	1120	-37	-25.6	0.691892	6.5	1-3,1129-1127;5-14,1125-1116;16-20,1115-1111	4-4,1126-1126[SIL];15-15,x-x[BULq];21-21,1110-1110[UP3]	.(((((-((((((((((.(((&))).)))))))))).))))).	CGGCUG-UUUUCCGGAGGAGG&CCUAUUUCGGAAGAACAGCCA	0	0	NA	NA	NA	1	30.281	4	0.694281	Output/S0h/cleaveLand_result/t_plot/PC-3p-1060_9765_XM_021129416.1_1120_TPlot.pdf	0	30.281	-Inf	down	3.7368e-08	4.29087e-08	yes	GO:0080090(regulation of primary metabolic process);GO:0003700(DNA binding transcription factor activity);GO:0031323(regulation of cellular metabolic process);GO:0019222(regulation of metabolic process);GO:1901363(heterocyclic compound binding);GO:0010556(regulation of macromolecule biosynthetic process);GO:0003677(DNA binding);GO:0050789(regulation of biological process);GO:0006355(regulation of…	ko04626(Plant-pathogen interaction);ko04016(MAPK signaling pathway - plant)
PC-3p-1060_9765	XM_021132478.1	423	445	434	-37	-24.9	0.672973	10	1-5,445-441;6-9,439-436;11-20,433-424	x-x,440-440[BULt];10-10,435-434[AILt];21-21,423-423[UP3]	.((((((((((..((((.(((((&)))))-))))-.)))))))))).	AGGCUGUUCUUGAUGAAUGUGGG&CCUAU-UUCG-GAAGAACAGCCA	1	33.3045	4	0.895124	Output/S8h/cleaveLand_result/t_plot/PC-3p-1060_9765_XM_021132478.1_434_TPlot.pdf	0	0	NA	NA	NA	33.3045	0	Inf	up	7.8779e-09	1.42259e-08	yes	NA	NA
PC-3p-1060_9765	XM_021142435.1	239	265	256	-37	-24.44	0.660541	20	1-3,265-263;5-10,261-256;13-21,247-239	4-4,262-262[SIL];11-12,255-248[AILt]	(((((((((........((((((.(((&))).))))))------..)))))))))	UGGCUGUUCAUGUCCCGCCGAAGGGGG&CCUAUUUCGG------AAGAACAGCCA	0	0	NA	NA	NA	1	30.281	4	0.977151	Output/S0h/cleaveLand_result/t_plot/PC-3p-1060_9765_XM_021142435.1_256_TPlot.pdf	0	30.281	-Inf	down	3.7368e-08	4.29087e-08	yes	NA	NA
PC-3p-107728_73	XM_016082672.2	616	637	630	-47.1	-30.8	0.653928	12.5	4-7,634-631;10-23,630-617	1-3,637-635[UP5];8-9,x-x[BULq];24-24,616-616[UP3]	.((((((((((((((--((((...&...))))..)))))))))))))).	GUCGGGUGCAGCGGC--CGUGGUU&UCACAUGAAGUCGCUGCACCUGAG	1	33.3045	4	0.84943	Output/S8h/cleaveLand_result/t_plot/PC-3p-107728_73_XM_016082672.2_630_TPlot.pdf	0	0	NA	NA	NA	33.3045	0	Inf	up	7.8779e-09	1.42259e-08	yes	GO:0016829(lyase activity);GO:0016836(hydro-lyase activity);GO:0008152(metabolic process);GO:0016835(carbon-oxygen lyase activity);GO:0003824(catalytic activity)	ko01110(Biosynthesis of secondary metabolites);ko01210(2-Oxocarboxylic acid metabolism);ko01100(Metabolic pathways);ko01230(Biosynthesis of amino acids);ko00660(C5-Branched dibasic acid metabolism);ko00290(Valine, leucine and isoleucine biosynthesis)
PC-3p-107728_73	XM_021132348.1	622	643	636	-47.1	-30.8	0.653928	12.5	4-7,640-637;10-23,636-623	1-3,643-641[UP5];8-9,x-x[BULq];24-24,622-622[UP3]	.((((((((((((((--((((...&...))))..)))))))))))))).	GUCGGGUGCAGCGGC--CGUGGUU&UCACAUGAAGUCGCUGCACCUGAG	0	0	NA	NA	NA	1	30.281	4	0.840152	Output/S0h/cleaveLand_result/t_plot/PC-3p-107728_73_XM_021132348.1_636_TPlot.pdf	0	30.281	-Inf	down	3.7368e-08	4.29087e-08	yes	GO:0016829(lyase activity);GO:0016836(hydro-lyase activity);GO:0008152(metabolic process);GO:0016835(carbon-oxygen lyase activity);GO:0003824(catalytic activity)	ko01110(Biosynthesis of secondary metabolites);ko01210(2-Oxocarboxylic acid metabolism);ko01100(Metabolic pathways);ko01230(Biosynthesis of amino acids);ko00660(C5-Branched dibasic acid metabolism);ko00290(Valine, leucine and isoleucine biosynthesis)
PC-3p-108384_72	XM_016082671.2	611	634	626	-45.2	-33.7	0.745575	9	2-9,633-626;11-20,625-616;21-22,614-613	1-1,634-634[UP5];10-10,x-x[BULq];x-x,615-615[BULt];23-24,612-611[UP3]	..((.((((((((((-((((((((.&.)))))))).))))))))))-))..	GCGCGUCGGGUGCAG-CGGCCGUGG&ACAUGGUCGACUGCACCUGA-GUUU	1	33.3045	4	0.332485	Output/S8h/cleaveLand_result/t_plot/PC-3p-108384_72_XM_016082671.2_626_TPlot.pdf	0	0	NA	NA	NA	33.3045	0	Inf	up	7.8779e-09	1.42259e-08	yes	GO:0016829(lyase activity);GO:0016836(hydro-lyase activity);GO:0008152(metabolic process);GO:0016835(carbon-oxygen lyase activity);GO:0003824(catalytic activity)	ko01110(Biosynthesis of secondary metabolites);ko01210(2-Oxocarboxylic acid metabolism);ko01100(Metabolic pathways);ko01230(Biosynthesis of amino acids);ko00660(C5-Branched dibasic acid metabolism);ko00290(Valine, leucine and isoleucine biosynthesis)
PC-3p-108384_72	XM_016082917.2	1369	1393	1384	-45.2	-31.6	0.699115	8	2-10,1392-1384;11-19,1382-1374;21-22,1372-1371	1-1,1393-1393[UP5];x-x,1383-1383[BULt];20-20,1373-1373[SIL];23-24,1370-1369[UP3]	..((.(((((((((.(((((((((.&.)))))))))-))))))))).))..	UUACACAGGUGCAGCUUGACCGUGC&ACAUGGUCGA-CUGCACCUGAGUUU	0	0	NA	NA	NA	1	30.281	4	0.521876	Output/S0h/cleaveLand_result/t_plot/PC-3p-108384_72_XM_016082917.2_1384_TPlot.pdf	0	30.281	-Inf	down	3.7368e-08	4.29087e-08	yes	GO:0008152(metabolic process);GO:0031966(mitochondrial membrane);GO:0044429(mitochondrial part);GO:0044260(cellular macromolecule metabolic process);GO:0044464(cell part);GO:0071704(organic substance metabolic process);GO:0015833(peptide transport);GO:0005488(binding);GO:0006627(protein processing involved in protein targeting to mitochondrion);GO:0007005(mitochondrion organization);GO:0046907(in…	NA
PC-3p-108384_72	XM_016084492.2	616	639	630	-45.2	-31.4	0.69469	12.5	5-21,635-619	1-4,639-636[UP5];22-24,618-616[UP3]	...(((((((((((((((((....&....)))))))))))))))))...	AGUUUCAGGUGCAGUUGGCCCUAG&ACAUGGUCGACUGCACCUGAGUUU	1	33.3045	4	0.535057	Output/S8h/cleaveLand_result/t_plot/PC-3p-108384_72_XM_016084492.2_630_TPlot.pdf	0	0	NA	NA	NA	33.3045	0	Inf	up	7.8779e-09	1.42259e-08	yes	GO:0009968(negative regulation of signal transduction);GO:0051704(multi-organism process);GO:0008152(metabolic process);GO:0044238(primary metabolic process);GO:0002239(response to oomycetes);GO:0043167(ion binding);GO:0030135(coated vesicle);GO:0023051(regulation of signaling);GO:0005737(cytoplasm);GO:0044464(cell part);GO:0051173(positive regulation of nitrogen compound metabolic process);GO:00…	NA
PC-3p-108384_72	XM_016107115.2	13567	13590	13581	-45.2	-32.1	0.710177	6	1-10,13590-13581;12-18,13579-13573;20-24,13571-13567	11-11,13580-13580[SIL];19-19,13572-13572[SIL]	(((((.(((((((.((((((((((&)))))))))).))))))).)))))	GGAUUGGGGUGCAUUUGACCAUGU&ACAUGGUCGACUGCACCUGAGUUU	0	0	NA	NA	NA	1	30.281	4	0.453228	Output/S0h/cleaveLand_result/t_plot/PC-3p-108384_72_XM_016107115.2_13581_TPlot.pdf	0	30.281	-Inf	down	3.7368e-08	4.29087e-08	yes	GO:0051234(establishment of localization);GO:0010101(post-embryonic root morphogenesis);GO:0048528(post-embryonic root development);GO:0050896(response to stimulus);GO:0009987(cellular process);GO:0005829(cytosol);GO:0009914(hormone transport);GO:0044424(intracellular part);GO:0051704(multi-organism process);GO:0016020(membrane);GO:0043169(cation binding);GO:0044444(cytoplasmic part);GO:0030054(c…	NA
PC-3p-110122_70	BGI_novel_T002762	1761	1783	1774	-32.1	-22.4	0.697819	7.5	2-15,1782-1769;17-20,1766-1763	1-1,1783-1783[UP5];16-16,1768-1767[AILt];21-22,1762-1761[UP3]	..((((..((((((((((((((.&.))))))))))))))-.))))..	CUGCAGCUGUUAACAGGAAUCUC&AGGAUUCUUGUUAAC-UUUGCUU	0	0	NA	NA	NA	1	30.281	4	0.99975	Output/S0h/cleaveLand_result/t_plot/PC-3p-110122_70_BGI_novel_T002762_1774_TPlot.pdf	0	30.281	-Inf	down	3.7368e-08	4.29087e-08	yes	GO:0097159(organic cyclic compound binding);GO:0003677(DNA binding);GO:0003676(nucleic acid binding);GO:0005488(binding);GO:1901363(heterocyclic compound binding)	NA
PC-3p-110122_70	BGI_novel_T003031	1596	1621	1612	-32.1	-21.16	0.65919	13.5	2-12,1620-1610;15-22,1603-1596	1-1,1621-1621[UP5];13-14,1609-1604[AILt]	((((((((......(((((((((((.&.)))))))))))----..))))))))	AAGCAGAGAGGGUGAGCAAGAAUUCA&AGGAUUCUUGUU----AACUUUGCUU	1	33.3045	4	1	Output/S8h/cleaveLand_result/t_plot/PC-3p-110122_70_BGI_novel_T003031_1612_TPlot.pdf	0	0	NA	NA	NA	33.3045	0	Inf	up	7.8779e-09	1.42259e-08	yes	NA	ko03013(RNA transport)
PC-3p-110122_70	BGI_novel_T003033	1596	1621	1612	-32.1	-21.16	0.65919	13.5	2-12,1620-1610;15-22,1603-1596	1-1,1621-1621[UP5];13-14,1609-1604[AILt]	((((((((......(((((((((((.&.)))))))))))----..))))))))	AAGCAGAGAGGGUGAGCAAGAAUUCA&AGGAUUCUUGUU----AACUUUGCUU	0	0	NA	NA	NA	1	30.281	4	1	Output/S0h/cleaveLand_result/t_plot/PC-3p-110122_70_BGI_novel_T003033_1612_TPlot.pdf	0	30.281	-Inf	down	3.7368e-08	4.29087e-08	yes	NA	ko03013(RNA transport)
PC-3p-110122_70	BGI_novel_T004296	851	872	864	-32.1	-21.4	0.666667	5.5	2-8,871-865;10-18,864-856;19-22,854-851	1-1,872-872[UP5];9-9,x-x[BULq];x-x,855-855[BULt]	((((.(((((((((-(((((((.&.))))))).)))))))))-))))	AAGCUGAAGUUAAC-AGAAUCUC&AGGAUUCUUGUUAACUUU-GCUU	0	0	NA	NA	NA	2	60.562	2	0.998043	Output/S0h/cleaveLand_result/t_plot/PC-3p-110122_70_BGI_novel_T004296_864_TPlot.pdf	0	60.562	-Inf	down	7.123e-15	2.99612e-14	yes	GO:0005515(protein binding);GO:0008092(cytoskeletal protein binding);GO:0071840(cellular component organization or biogenesis);GO:0009987(cellular process);GO:0015631(tubulin binding);GO:0008017(microtubule binding);GO:0005488(binding);GO:0016043(cellular component organization);GO:0007010(cytoskeleton organization);GO:0006996(organelle organization)	ko03013(RNA transport)
PC-3p-110122_70	BGI_novel_T005841	618	640	630	-32.1	-22.3	0.694704	9.5	2-2,639-639;5-22,635-618	1-1,640-640[UP5];3-4,638-636[AILt]	((((((((((((((((((...(.&.)-..))))))))))))))))))	GAGUGAAGUUGACAAGAAGCACA&AG-GAUUCUUGUUAACUUUGCUU	1	33.3045	4	0.999876	Output/S8h/cleaveLand_result/t_plot/PC-3p-110122_70_BGI_novel_T005841_630_TPlot.pdf	1	30.281	4	0.999922	Output/S0h/cleaveLand_result/t_plot/PC-3p-110122_70_BGI_novel_T005841_630_TPlot.pdf	33.3045	30.281	0.137303	up	0.70456	0.704918	yes	GO:0043933(macromolecular complex subunit organization);GO:0044464(cell part);GO:0006461(protein complex assembly);GO:0022607(cellular component assembly);GO:0009987(cellular process);GO:0005829(cytosol);GO:0071840(cellular component organization or biogenesis);GO:0044424(intracellular part);GO:0005622(intracellular);GO:0044085(cellular component biogenesis);GO:0034622(cellular macromolecular com…	NA
PC-3p-110122_70	BGI_novel_T010583	398	418	410	-32.1	-21.3	0.663551	9	2-3,417-416;5-11,415-409;13-21,407-399	1-1,418-418[UP5];4-4,x-x[BULq];12-12,408-408[SIL];22-22,398-398[UP3]	.(((((((((.(((((((-((.&.)).))))))).))))))))).	UGGCAAGGUUUACAAGGG-CCA&AGGAUUCUUGUUAACUUUGCUU	1	33.3045	4	1	Output/S8h/cleaveLand_result/t_plot/PC-3p-110122_70_BGI_novel_T010583_410_TPlot.pdf	1	30.281	4	1	Output/S0h/cleaveLand_result/t_plot/PC-3p-110122_70_BGI_novel_T010583_410_TPlot.pdf	33.3045	30.281	0.137303	up	0.70456	0.704918	yes	GO:0006468(protein phosphorylation);GO:0032553(ribonucleotide binding);GO:0009987(cellular process);GO:0097159(organic cyclic compound binding);GO:0043167(ion binding);GO:0019538(protein metabolic process);GO:0018193(peptidyl-amino acid modification);GO:0043168(anion binding);GO:0000166(nucleotide binding);GO:0032555(purine ribonucleotide binding);GO:0016772(transferase activity, transferring pho…	NA
PC-3p-110122_70	BGI_novel_T011252	1359	1379	1371	-32.1	-22.8	0.71028	10.5	2-8,1378-1372;11-21,1370-1360	1-1,1379-1379[UP5];9-10,1371-1371[AILq];22-22,1359-1359[UP3]	.(((((((((((.-(((((((.&.)))))))..))))))))))).	UGGCGAGGUUGAG-GGAGUCCC&AGGAUUCUUGUUAACUUUGCUU	1	33.3045	4	0.997059	Output/S8h/cleaveLand_result/t_plot/PC-3p-110122_70_BGI_novel_T011252_1371_TPlot.pdf	0	0	NA	NA	NA	33.3045	0	Inf	up	7.8779e-09	1.42259e-08	yes	GO:0003677(DNA binding);GO:0009987(cellular process);GO:0051301(cell division);GO:0097159(organic cyclic compound binding);GO:0003676(nucleic acid binding);GO:1901363(heterocyclic compound binding);GO:0005488(binding)	ko03040(Spliceosome)
PC-3p-110122_70	BGI_novel_T012198	2484	2505	2495	-32.1	-20.9	0.65109	7.5	2-6,2504-2500;7-16,2498-2489;19-22,2487-2484	1-1,2505-2505[UP5];x-x,2499-2499[BULt];17-18,2488-2488[AILq]	((((.-((((((((((.(((((.&.)))))-))))))))))..))))	GAGCU-AGUUGACAAGAAAUCUA&AGGAUU-CUUGUUAACUUUGCUU	1	33.3045	4	1	Output/S8h/cleaveLand_result/t_plot/PC-3p-110122_70_BGI_novel_T012198_2495_TPlot.pdf	0	0	NA	NA	NA	33.3045	0	Inf	up	7.8779e-09	1.42259e-08	yes	GO:0044257(cellular protein catabolic process);GO:0019538(protein metabolic process);GO:0044267(cellular protein metabolic process);GO:0043412(macromolecule modification);GO:0019783(ubiquitin-like protein-specific protease activity);GO:0101005(ubiquitinyl hydrolase activity);GO:0036211(protein modification process);GO:0006511(ubiquitin-dependent protein catabolic process);GO:0044237(cellular meta…	NA
PC-3p-110122_70	BGI_novel_T012512	1587	1609	1600	-32.1	-23.2	0.722741	4.5	1-14,1609-1596;15-22,1594-1587	x-x,1595-1595[BULt]	((((((((.((((((((((((((&))))))))))))))-))))))))	AAGCAAGGAUUAACAAGGAUUUU&AGGAUUCUUGUUAA-CUUUGCUU	0	0	NA	NA	NA	1	30.281	4	0.987507	Output/S0h/cleaveLand_result/t_plot/PC-3p-110122_70_BGI_novel_T012512_1600_TPlot.pdf	0	30.281	-Inf	down	3.7368e-08	4.29087e-08	yes	GO:0006518(peptide metabolic process);GO:0016875(ligase activity, forming carbon-oxygen bonds);GO:0043043(peptide biosynthetic process);GO:0036094(small molecule binding);GO:0044249(cellular biosynthetic process);GO:0043168(anion binding);GO:0009058(biosynthetic process);GO:0043038(amino acid activation);GO:0044281(small molecule metabolic process);GO:1901576(organic substance biosynthetic proces…	ko00970(Aminoacyl-tRNA biosynthesis)
PC-3p-110122_70	BGI_novel_T012562	322	343	334	-32.1	-21.3	0.663551	10	1-3,343-341;6-7,338-337;9-12,335-332;15-22,329-322	4-5,340-339[SIL];8-8,336-336[SIL];13-14,331-330[SIL]	((((((((..((((.((..(((&)))..)).))))..))))))))	GAGCAGAGGGAACGCGAUGCCU&AGGAUUCUUGUUAACUUUGCUU	0	0	NA	NA	NA	1	30.281	4	1	Output/S0h/cleaveLand_result/t_plot/PC-3p-110122_70_BGI_novel_T012562_334_TPlot.pdf	0	30.281	-Inf	down	3.7368e-08	4.29087e-08	yes	GO:0000166(nucleotide binding);GO:0097159(organic cyclic compound binding);GO:0044464(cell part);GO:0044444(cytoplasmic part);GO:1901265(nucleoside phosphate binding);GO:0005488(binding);GO:0005737(cytoplasm);GO:0044424(intracellular part);GO:0003676(nucleic acid binding);GO:1901363(heterocyclic compound binding);GO:0005829(cytosol);GO:0036094(small molecule binding);GO:0005622(intracellular);GO:…	NA
PC-3p-110122_70	BGI_novel_T013047	767	788	779	-32.1	-21.3	0.663551	6	2-3,787-786;5-14,784-775;16-22,773-767	1-1,788-788[UP5];4-4,785-785[SIL];15-15,774-774[SIL]	(((((((.((((((((((.((.&.)).)))))))))).)))))))	AAGCGAGAUUGACAAGAAGCCA&AGGAUUCUUGUUAACUUUGCUU	1	33.3045	4	1	Output/S8h/cleaveLand_result/t_plot/PC-3p-110122_70_BGI_novel_T013047_779_TPlot.pdf	0	0	NA	NA	NA	33.3045	0	Inf	up	7.8779e-09	1.42259e-08	yes	GO:0008380(RNA splicing);GO:0044464(cell part);GO:0044424(intracellular part);GO:1901360(organic cyclic compound metabolic process);GO:0006725(cellular aromatic compound metabolic process);GO:0044238(primary metabolic process);GO:0044260(cellular macromolecule metabolic process);GO:0043227(membrane-bounded organelle);GO:0071704(organic substance metabolic process);GO:0005622(intracellular);GO:000…	NA
PC-3p-110122_70	XM_016076141.2	786	808	798	-32.1	-21.7	0.676012	11.5	2-4,807-805;6-20,802-788	1-1,808-808[UP5];5-5,804-803[AILt];21-22,787-786[UP3]	..(((((((((((((((..(((.&.)))-.)))))))))))))))..	AUGCAGAGUUGACAGGGCUUUCG&AGGA-UUCUUGUUAACUUUGCUU	0	0	NA	NA	NA	1	30.281	4	0.999999	Output/S0h/cleaveLand_result/t_plot/PC-3p-110122_70_XM_016076141.2_798_TPlot.pdf	0	30.281	-Inf	down	3.7368e-08	4.29087e-08	yes	GO:0016787(hydrolase activity);GO:0003824(catalytic activity)	NA
PC-3p-110122_70	XM_016078215.2	1675	1702	1693	-32.1	-21.3	0.663551	9.5	2-12,1701-1691;14-16,1689-1687;17-22,1680-1675	1-1,1702-1702[UP5];13-13,1690-1690[SIL];x-x,1686-1681[BULt]	((((((......(((.(((((((((((.&.))))))))))).)))------))))))	AAGCAAGAAAACGGUAAACAAGGAUCCC&AGGAUUCUUGUUAACU------UUGCUU	0	0	NA	NA	NA	1	30.281	4	1	Output/S0h/cleaveLand_result/t_plot/PC-3p-110122_70_XM_016078215.2_1693_TPlot.pdf	0	30.281	-Inf	down	3.7368e-08	4.29087e-08	yes	GO:0043229(intracellular organelle);GO:0090304(nucleic acid metabolic process);GO:0034645(cellular macromolecule biosynthetic process);GO:0006259(DNA metabolic process);GO:0044249(cellular biosynthetic process);GO:0009059(macromolecule biosynthetic process);GO:0005623(cell);GO:0071704(organic substance metabolic process);GO:1901360(organic cyclic compound metabolic process);GO:0006139(nucleobase-…	ko03410(Base excision repair);ko00240(Pyrimidine metabolism);ko03030(DNA replication);ko03430(Mismatch repair);ko01100(Metabolic pathways);ko03440(Homologous recombination);ko03420(Nucleotide excision repair);ko00230(Purine metabolism)
PC-3p-110122_70	XM_016078791.2	835	858	849	-32.1	-22.4	0.697819	8	2-10,857-849;11-12,846-845;15-22,842-835	1-1,858-858[UP5];x-x,848-847[BULt];13-14,844-843[SIL]	((((((((..((..(((((((((.&.)))))))))--))..))))))))	AAGCAAAGGCAAACCAGGAAUCCA&AGGAUUCUUG--UUAACUUUGCUU	1	33.3045	4	0.999678	Output/S8h/cleaveLand_result/t_plot/PC-3p-110122_70_XM_016078791.2_849_TPlot.pdf	0	0	NA	NA	NA	33.3045	0	Inf	up	7.8779e-09	1.42259e-08	yes	GO:0016746(transferase activity, transferring acyl groups);GO:0016740(transferase activity);GO:0003824(catalytic activity);GO:0016747(transferase activity, transferring acyl groups other than amino-acyl groups)	NA
PC-3p-110122_70	XM_016079227.2	1805	1825	1817	-32.1	-21.2	0.660436	10	2-3,1824-1823;5-9,1822-1818;11-22,1816-1805	1-1,1825-1825[UP5];4-4,x-x[BULq];10-10,1817-1817[SIL]	((((((((((((.(((((-((.&.)).))))).))))))))))))	AGGCAAGGUUGAGGAGAG-CUG&AGGAUUCUUGUUAACUUUGCUU	2	66.6089	3	0.857015	Output/S8h/cleaveLand_result/t_plot/PC-3p-110122_70_XM_016079227.2_1817_TPlot.pdf	1	30.281	4	1	Output/S0h/cleaveLand_result/t_plot/PC-3p-110122_70_XM_016079227.2_1817_TPlot.pdf	66.6089	30.281	1.1373	up	0.00022361	0.000246722	yes	GO:0005623(cell);GO:0065007(biological regulation);GO:0050789(regulation of biological process);GO:0009987(cellular process);GO:0065008(regulation of biological quality);GO:0050794(regulation of cellular process);GO:0042592(homeostatic process);GO:0019725(cellular homeostasis);GO:0045454(cell redox homeostasis)	NA
PC-3p-110122_70	XM_016079967.2	1016	1037	1028	-32.1	-22.3	0.694704	9.5	3-9,1035-1029;11-21,1027-1017	1-2,1037-1036[UP5];10-10,1028-1028[SIL];22-22,1016-1016[UP3]	.(((((((((((.(((((((..&..))))))).))))))))))).	CAGUAGGGUUAGGGAGAAUCGC&AGGAUUCUUGUUAACUUUGCUU	13	432.958	2	0.946062	Output/S8h/cleaveLand_result/t_plot/PC-3p-110122_70_XM_016079967.2_1028_TPlot.pdf	6	181.686	2	0.954383	Output/S0h/cleaveLand_result/t_plot/PC-3p-110122_70_XM_016079967.2_1028_TPlot.pdf	432.958	181.686	1.25278	up	3.7949e-24	8.60986e-23	yes	GO:0008270(zinc ion binding);GO:0019538(protein metabolic process);GO:0032446(protein modification by small protein conjugation);GO:0046872(metal ion binding);GO:0061659(ubiquitin-like protein ligase activity);GO:1901564(organonitrogen compound metabolic process);GO:0043632(modification-dependent macromolecule catabolic process);GO:0044257(cellular protein catabolic process);GO:0042787(protein ub…	NA
PC-3p-110122_70	XM_016080239.2	1999	2020	2011	-32.1	-21.6	0.672897	9.5	3-22,2018-1999	1-2,2020-2019[UP5]	((((((((((((((((((((..&..))))))))))))))))))))	AGGUGGGGUUAGCAAGGGUUGC&AGGAUUCUUGUUAACUUUGCUU	3	99.9134	2	0.993292	Output/S8h/cleaveLand_result/t_plot/PC-3p-110122_70_XM_016080239.2_2011_TPlot.pdf	1	30.281	4	1	Output/S0h/cleaveLand_result/t_plot/PC-3p-110122_70_XM_016080239.2_2011_TPlot.pdf	99.9134	30.281	1.72227	up	1.0422e-09	4.10813e-09	yes	GO:0044464(cell part);GO:0043227(membrane-bounded organelle);GO:0043229(intracellular organelle);GO:0044424(intracellular part);GO:0005545(1-phosphatidylinositol binding);GO:0005543(phospholipid binding);GO:0043168(anion binding);GO:0043623(cellular protein complex assembly);GO:0097708(intracellular vesicle);GO:0070271(protein complex biogenesis);GO:0016043(cellular component organization);GO:006…	NA
PC-3p-110122_70	XM_016081035.2	971	994	985	-32.1	-21.96	0.684112	13.5	2-11,993-984;15-21,978-972	1-1,994-994[UP5];12-14,983-979[AILt];22-22,971-971[UP3]	.(((((((.....((((((((((.&.))))))))))--...))))))).	CGGCGAGGGCUGUACAAGGGUCCG&AGGAUUCUUGU--UAACUUUGCUU	0	0	NA	NA	NA	1	30.281	4	0.99999	Output/S0h/cleaveLand_result/t_plot/PC-3p-110122_70_XM_016081035.2_985_TPlot.pdf	0	30.281	-Inf	down	3.7368e-08	4.29087e-08	yes	GO:0070482(response to oxygen levels);GO:0009061(anaerobic respiration);GO:0019538(protein metabolic process);GO:0055114(oxidation-reduction process);GO:0044260(cellular macromolecule metabolic process);GO:0018171(peptidyl-cysteine oxidation);GO:0042221(response to chemical);GO:0016702(oxidoreductase activity, acting on single donors with incorporation of molecular oxygen, incorporation of two at…	ko01100(Metabolic pathways);ko00430(Taurine and hypotaurine metabolism)
PC-3p-110122_70	XM_016081466.2	234	254	245	-32.1	-22.4	0.697819	8	2-13,253-242;15-21,241-235	1-1,254-254[UP5];14-14,x-x[BULq];22-22,234-234[UP3]	.(((((((-((((((((((((.&.)))))))))))).))))))).	UGGCAGAG-UGAUAGGAAUCUC&AGGAUUCUUGUUAACUUUGCUU	2	66.6089	3	0.530059	Output/S8h/cleaveLand_result/t_plot/PC-3p-110122_70_XM_016081466.2_245_TPlot.pdf	0	0	NA	NA	NA	66.6089	0	Inf	up	3.3071e-16	2.0359e-15	yes	GO:0004659(prenyltransferase activity);GO:0043227(membrane-bounded organelle);GO:0009507(chloroplast);GO:0005737(cytoplasm);GO:0043229(intracellular organelle);GO:0003824(catalytic activity);GO:0005623(cell);GO:0044424(intracellular part);GO:0044444(cytoplasmic part);GO:0016765(transferase activity, transferring alkyl or aryl (other than methyl) groups);GO:0009536(plastid);GO:0005622(intracellula…	ko01110(Biosynthesis of secondary metabolites);ko00130(Ubiquinone and other terpenoid-quinone biosynthesis);ko01100(Metabolic pathways)
PC-3p-110122_70	XM_016082670.2	500	523	512	-32.1	-25.9	0.806854	6.5	1-3,523-521;4-21,518-501	x-x,520-519[BULt];22-22,500-500[UP3]	.((((((((((((((((((..(((&)))--)))))))))))))))))).	UGGCGAGGUUAACAAGAAUGACCU&AGG--AUUCUUGUUAACUUUGCUU	0	0	NA	NA	NA	9	272.529	2	0.211868	Output/S0h/cleaveLand_result/t_plot/PC-3p-110122_70_XM_016082670.2_512_TPlot.pdf	0	272.529	-Inf	down	3.1306e-61	3.28657e-59	yes	GO:0003824(catalytic activity);GO:0015399(primary active transmembrane transporter activity);GO:0005773(vacuole);GO:0016817(hydrolase activity, acting on acid anhydrides);GO:0031090(organelle membrane);GO:0005623(cell);GO:0098805(whole membrane);GO:0043227(membrane-bounded organelle);GO:0016462(pyrophosphatase activity);GO:0005794(Golgi apparatus);GO:0016020(membrane);GO:0043492(ATPase activity, …	ko00190(Oxidative phosphorylation);ko04145(Phagosome);ko01100(Metabolic pathways)
PC-3p-110122_70	XM_016084212.2	751	771	763	-32.1	-21.2	0.660436	8	2-9,770-763;11-21,762-752	1-1,771-771[UP5];10-10,x-x[BULq];22-22,751-751[UP3]	.(((((((((((-((((((((.&.)))))))).))))))))))).	UGGCAAGGUUAG-AAGGAUCUC&AGGAUUCUUGUUAACUUUGCUU	0	0	NA	NA	NA	1	30.281	4	1	Output/S0h/cleaveLand_result/t_plot/PC-3p-110122_70_XM_016084212.2_763_TPlot.pdf	0	30.281	-Inf	down	3.7368e-08	4.29087e-08	yes	NA	NA
PC-3p-110122_70	XM_016084270.2	318	339	330	-32.1	-26.5	0.825545	6	2-4,338-336;7-22,333-318	1-1,339-339[UP5];5-6,335-334[SIL]	((((((((((((((((..(((.&.)))..))))))))))))))))	GAGCAAGGUUAACAAGCCUCCA&AGGAUUCUUGUUAACUUUGCUU	1	33.3045	4	0.373755	Output/S8h/cleaveLand_result/t_plot/PC-3p-110122_70_XM_016084270.2_330_TPlot.pdf	7	211.967	2	0.155463	Output/S0h/cleaveLand_result/t_plot/PC-3p-110122_70_XM_016084270.2_330_TPlot.pdf	33.3045	211.967	-2.67005	down	3.7828e-30	1.11857e-28	yes	GO:0003735(structural constituent of ribosome);GO:0043228(non-membrane-bounded organelle);GO:0071704(organic substance metabolic process);GO:0006518(peptide metabolic process);GO:0043232(intracellular non-membrane-bounded organelle);GO:0043043(peptide biosynthetic process);GO:0022625(cytosolic large ribosomal subunit);GO:0022626(cytosolic ribosome);GO:0044237(cellular metabolic process);GO:000519…	ko03010(Ribosome)
PC-3p-110122_70	XM_016085507.2	2475	2496	2486	-32.1	-20.9	0.65109	7.5	2-6,2495-2491;7-16,2489-2480;19-22,2478-2475	1-1,2496-2496[UP5];x-x,2490-2490[BULt];17-18,2479-2479[AILq]	((((.-((((((((((.(((((.&.)))))-))))))))))..))))	GAGCU-AGUUGACAAGAAAUCUA&AGGAUU-CUUGUUAACUUUGCUU	1	33.3045	4	1	Output/S8h/cleaveLand_result/t_plot/PC-3p-110122_70_XM_016085507.2_2486_TPlot.pdf	0	0	NA	NA	NA	33.3045	0	Inf	up	7.8779e-09	1.42259e-08	yes	GO:0044257(cellular protein catabolic process);GO:0019538(protein metabolic process);GO:0044267(cellular protein metabolic process);GO:0043412(macromolecule modification);GO:0019783(ubiquitin-like protein-specific protease activity);GO:0101005(ubiquitinyl hydrolase activity);GO:0036211(protein modification process);GO:0006511(ubiquitin-dependent protein catabolic process);GO:0044237(cellular meta…	NA
PC-3p-110122_70	XM_016085670.2	391	413	404	-32.1	-21.8	0.679128	7	2-3,412-411;5-13,409-401;14-20,399-393	1-1,413-413[UP5];4-4,410-410[SIL];x-x,400-400[BULt];21-22,392-391[UP3]	..(((((((.(((((((((.((.&.)).)))))))))-)))))))..	UCGCGAGGUAUAACAAGAAACCA&AGGAUUCUUGUUA-ACUUUGCUU	3	99.9134	2	0.98701	Output/S8h/cleaveLand_result/t_plot/PC-3p-110122_70_XM_016085670.2_404_TPlot.pdf	1	30.281	4	0.999998	Output/S0h/cleaveLand_result/t_plot/PC-3p-110122_70_XM_016085670.2_404_TPlot.pdf	99.9134	30.281	1.72227	up	1.0422e-09	4.10813e-09	yes	GO:0043227(membrane-bounded organelle);GO:0003676(nucleic acid binding);GO:0000786(nucleosome);GO:1901363(heterocyclic compound binding);GO:0044815(DNA packaging complex);GO:0046983(protein dimerization activity);GO:0097159(organic cyclic compound binding);GO:0043231(intracellular membrane-bounded organelle);GO:0044424(intracellular part);GO:0043228(non-membrane-bounded organelle);GO:0032991(macr…	NA
PC-3p-110122_70	XM_016086542.2	1576	1598	1589	-32.1	-23.2	0.722741	4.5	1-14,1598-1585;15-22,1583-1576	x-x,1584-1584[BULt]	((((((((.((((((((((((((&))))))))))))))-))))))))	AAGCAAGGAUUAACAAGGAUUUU&AGGAUUCUUGUUAA-CUUUGCUU	1	33.3045	4	0.989233	Output/S8h/cleaveLand_result/t_plot/PC-3p-110122_70_XM_016086542.2_1589_TPlot.pdf	0	0	NA	NA	NA	33.3045	0	Inf	up	7.8779e-09	1.42259e-08	yes	GO:0006518(peptide metabolic process);GO:0016875(ligase activity, forming carbon-oxygen bonds);GO:0043043(peptide biosynthetic process);GO:0036094(small molecule binding);GO:0044249(cellular biosynthetic process);GO:0043168(anion binding);GO:0009058(biosynthetic process);GO:0043038(amino acid activation);GO:0044281(small molecule metabolic process);GO:1901576(organic substance biosynthetic proces…	ko00970(Aminoacyl-tRNA biosynthesis)
PC-3p-110122_70	XM_016086701.2	669	691	681	-32.1	-23.8	0.741433	7	1-4,691-688;5-12,686-679;15-22,676-669	x-x,687-687[BULt];13-14,678-677[SIL]	((((((((..((((((((.((((&))))-))))))))..))))))))	GAGCGAAGAGAGCAAGAGCUCCU&AGGA-UUCUUGUUAACUUUGCUU	0	0	NA	NA	NA	1	30.281	4	0.880473	Output/S0h/cleaveLand_result/t_plot/PC-3p-110122_70_XM_016086701.2_681_TPlot.pdf	0	30.281	-Inf	down	3.7368e-08	4.29087e-08	yes	NA	ko04712(Circadian rhythm - plant)
PC-3p-110122_70	XM_016086828.2	251	270	262	-32.1	-22.5	0.700935	6	2-8,269-263;10-17,262-255;19-22,254-251	1-1,270-270[UP5];9-9,x-x[BULq];18-18,x-x[BULq]	((((-((((((((-(((((((.&.))))))).)))))))).))))	GAGC-GAGUUAAC-GGAAUCCG&AGGAUUCUUGUUAACUUUGCUU	2	66.6089	2	0.917203	Output/S8h/cleaveLand_result/t_plot/PC-3p-110122_70_XM_016086828.2_262_TPlot.pdf	3	90.843	2	0.928234	Output/S0h/cleaveLand_result/t_plot/PC-3p-110122_70_XM_016086828.2_262_TPlot.pdf	66.6089	90.843	-0.44766	down	0.053435	0.0570321	yes	GO:0009813(flavonoid biosynthetic process);GO:0009058(biosynthetic process);GO:0009812(flavonoid metabolic process);GO:0016872(intramolecular lyase activity);GO:0003824(catalytic activity);GO:0045430(chalcone isomerase activity);GO:1901576(organic substance biosynthetic process);GO:0016853(isomerase activity);GO:0008152(metabolic process);GO:0071704(organic substance metabolic process)	ko01100(Metabolic pathways);ko01110(Biosynthesis of secondary metabolites);ko00941(Flavonoid biosynthesis)
PC-3p-110122_70	XM_016087637.2	2197	2221	2212	-32.1	-21.2	0.660436	10.5	2-17,2220-2205;18-21,2201-2198	1-1,2221-2221[UP5];x-x,2204-2202[BULt];22-22,2197-2197[UP3]	.((((...((((((((((((((((.&.))))))))))))))))---)))).	UAGUACUGGGGUUGGCAAGAGUCUC&AGGAUUCUUGUUAACUU---UGCUU	0	0	NA	NA	NA	2	60.562	1	0.33867	Output/S0h/cleaveLand_result/t_plot/PC-3p-110122_70_XM_016087637.2_2212_TPlot.pdf	0	60.562	-Inf	down	7.123e-15	2.99612e-14	yes	GO:2000112(regulation of cellular macromolecule biosynthetic process);GO:0044464(cell part);GO:0051246(regulation of protein metabolic process);GO:0044248(cellular catabolic process);GO:0043228(non-membrane-bounded organelle);GO:0005737(cytoplasm);GO:0019439(aromatic compound catabolic process);GO:0006139(nucleobase-containing compound metabolic process);GO:0043170(macromolecule metabolic process…	ko03018(RNA degradation)
PC-3p-110122_70	XM_016087838.2	1542	1565	1553	-32.1	-20.9	0.65109	9	1-5,1565-1561;6-18,1557-1545;20-22,1544-1542	x-x,1560-1558[BULt];19-19,x-x[BULq]	(((-(((((((((((((...(((((&)))))---))))))))))))).)))	GAG-AAGGUUAACAGGAAAUAUCCU&AGGAU---UCUUGUUAACUUUGCUU	2	66.6089	3	0.924362	Output/S8h/cleaveLand_result/t_plot/PC-3p-110122_70_XM_016087838.2_1553_TPlot.pdf	2	60.562	3	0.93743	Output/S0h/cleaveLand_result/t_plot/PC-3p-110122_70_XM_016087838.2_1553_TPlot.pdf	66.6089	60.562	0.137303	up	0.5918	0.618394	yes	GO:0030880(RNA polymerase complex);GO:0005622(intracellular);GO:1901564(organonitrogen compound metabolic process);GO:0043234(protein complex);GO:0044451(nucleoplasm part);GO:2001141(regulation of RNA biosynthetic process);GO:0008152(metabolic process);GO:0009891(positive regulation of biosynthetic process);GO:0006357(regulation of transcription from RNA polymerase II promoter);GO:0008023(transcr…	NA
PC-3p-110122_70	XM_016088364.2	4077	4100	4091	-32.1	-23.3	0.725857	7	1-18,4100-4083;19-21,4080-4078	x-x,4082-4081[BULt];22-22,4077-4077[UP3]	.(((..((((((((((((((((((&))))))))))))))))))--))).	CAGUUUGAAGUUGACAAGAGUCUU&AGGAUUCUUGUUAACUUU--GCUU	1	33.3045	4	0.979178	Output/S8h/cleaveLand_result/t_plot/PC-3p-110122_70_XM_016088364.2_4091_TPlot.pdf	0	0	NA	NA	NA	33.3045	0	Inf	up	7.8779e-09	1.42259e-08	yes	NA	NA
PC-3p-110122_70	XM_016092255.2	673	694	685	-32.1	-22.9	0.713396	9.5	3-12,692-683;15-21,680-674	1-2,694-693[UP5];13-14,682-681[SIL];22-22,673-673[UP3]	.(((((((..((((((((((..&..))))))))))..))))))).	UGGCAAAGGAAGCAGGGAUCAU&AGGAUUCUUGUUAACUUUGCUU	0	0	NA	NA	NA	1	30.281	4	0.996585	Output/S0h/cleaveLand_result/t_plot/PC-3p-110122_70_XM_016092255.2_685_TPlot.pdf	0	30.281	-Inf	down	3.7368e-08	4.29087e-08	yes	GO:0055085(transmembrane transport);GO:0044425(membrane part);GO:0051179(localization);GO:0016021(integral component of membrane);GO:0006810(transport);GO:0051234(establishment of localization);GO:0031224(intrinsic component of membrane);GO:0016020(membrane)	NA
PC-3p-110122_70	XM_016094798.2	321	342	333	-32.1	-21.6	0.672897	9	1-2,342-341;5-12,338-331;15-21,328-322	3-4,340-339[SIL];13-14,330-329[SIL];22-22,321-321[UP3]	.(((((((..((((((((..((&))..))))))))..))))))).	UGGCAGAGGUGACAAGAAAACU&AGGAUUCUUGUUAACUUUGCUU	0	0	NA	NA	NA	1	30.281	4	1	Output/S0h/cleaveLand_result/t_plot/PC-3p-110122_70_XM_016094798.2_333_TPlot.pdf	0	30.281	-Inf	down	3.7368e-08	4.29087e-08	yes	GO:0044237(cellular metabolic process);GO:0071840(cellular component organization or biogenesis);GO:1990904(ribonucleoprotein complex);GO:0043231(intracellular membrane-bounded organelle);GO:0044464(cell part);GO:0009941(chloroplast envelope);GO:0009507(chloroplast);GO:0044267(cellular protein metabolic process);GO:0044260(cellular macromolecule metabolic process);GO:0032991(macromolecular comple…	NA
PC-3p-110122_70	XM_016096010.2	891	913	904	-32.1	-21.2	0.660436	9	3-11,911-903;12-21,901-892	1-2,913-912[UP5];x-x,902-902[BULt];22-22,891-891[UP3]	.((((((((((.(((((((((..&..)))))))))-)))))))))).	CAGUGAAGUUGUACAAGGAUCAC&AGGAUUCUUGU-UAACUUUGCUU	1	33.3045	4	1	Output/S8h/cleaveLand_result/t_plot/PC-3p-110122_70_XM_016096010.2_904_TPlot.pdf	0	0	NA	NA	NA	33.3045	0	Inf	up	7.8779e-09	1.42259e-08	yes	GO:0044425(membrane part);GO:0016021(integral component of membrane);GO:0016020(membrane);GO:0031224(intrinsic component of membrane)	NA
PC-3p-110122_70	XM_016096689.2	1089	1108	1101	-32.1	-22.4	0.697819	8	2-8,1107-1101;11-21,1100-1090	1-1,1108-1108[UP5];9-10,x-x[BULq];22-22,1089-1089[UP3]	.(((((((((((--(((((((.&.)))))))..))))))))))).	UGGCAAGGUUGA--AGAAUCCA&AGGAUUCUUGUUAACUUUGCUU	0	0	NA	NA	NA	2	60.562	2	0.949594	Output/S0h/cleaveLand_result/t_plot/PC-3p-110122_70_XM_016096689.2_1101_TPlot.pdf	0	60.562	-Inf	down	7.123e-15	2.99612e-14	yes	GO:1990837(sequence-specific double-stranded DNA binding);GO:0034654(nucleobase-containing compound biosynthetic process);GO:0003690(double-stranded DNA binding);GO:0097159(organic cyclic compound binding);GO:0003677(DNA binding);GO:0044464(cell part);GO:0006139(nucleobase-containing compound metabolic process);GO:0044271(cellular nitrogen compound biosynthetic process);GO:0032774(RNA biosyntheti…	ko04075(Plant hormone signal transduction);ko04712(Circadian rhythm - plant)
PC-3p-110122_70	XM_016097141.2	1595	1617	1608	-32.1	-21.6	0.672897	9	3-10,1615-1608;11-16,1606-1601;18-22,1599-1595	1-2,1617-1616[UP5];x-x,1607-1607[BULt];17-17,1600-1600[SIL]	(((((.((((((.((((((((..&..))))))))-)))))).)))))	AGGCAUGGUUGAUCGAGAAUCAU&AGGAUUCUUG-UUAACUUUGCUU	4	133.218	2	0.994199	Output/S8h/cleaveLand_result/t_plot/PC-3p-110122_70_XM_016097141.2_1608_TPlot.pdf	0	0	NA	NA	NA	133.218	0	Inf	up	8.0653e-31	2.42945e-29	yes	GO:0000166(nucleotide binding);GO:0016628(oxidoreductase activity, acting on the CH-CH group of donors, NAD or NADP as acceptor);GO:0048037(cofactor binding);GO:0016021(integral component of membrane);GO:0043168(anion binding);GO:0016020(membrane);GO:1901265(nucleoside phosphate binding);GO:0005488(binding);GO:0008202(steroid metabolic process);GO:0016614(oxidoreductase activity, acting on CH-OH …	ko01100(Metabolic pathways);ko01110(Biosynthesis of secondary metabolites);ko00100(Steroid biosynthesis)
PC-3p-110122_70	XM_016097382.2	663	685	675	-32.1	-22.6	0.70405	8	1-6,685-680;7-13,678-672;15-20,670-665	x-x,679-679[BULt];14-14,671-671[SIL];21-22,664-663[UP3]	..((((((.(((((((.((((((&))))))-))))))).))))))..	CUGCAAAGAUGGCAAGUGAUCCU&AGGAUU-CUUGUUAACUUUGCUU	1	33.3045	4	0.998542	Output/S8h/cleaveLand_result/t_plot/PC-3p-110122_70_XM_016097382.2_675_TPlot.pdf	0	0	NA	NA	NA	33.3045	0	Inf	up	7.8779e-09	1.42259e-08	yes	GO:0016020(membrane)	NA
PC-3p-110122_70	XM_016097640.2	1755	1780	1771	-32.1	-21.16	0.65919	13.5	2-12,1779-1769;15-22,1762-1755	1-1,1780-1780[UP5];13-14,1768-1763[AILt]	((((((((......(((((((((((.&.)))))))))))----..))))))))	AAGCAGAGAGGGUGAGCAAGAAUUCA&AGGAUUCUUGUU----AACUUUGCUU	1	33.3045	4	1	Output/S8h/cleaveLand_result/t_plot/PC-3p-110122_70_XM_016097640.2_1771_TPlot.pdf	0	0	NA	NA	NA	33.3045	0	Inf	up	7.8779e-09	1.42259e-08	yes	NA	ko03013(RNA transport)
PC-3p-110122_70	XM_016097900.2	1247	1271	1262	-32.1	-22.4	0.697819	5.5	2-13,1270-1259;14-16,1257-1255;17-21,1252-1248	1-1,1271-1271[UP5];x-x,1258-1258[BULt];x-x,1254-1253[BULt];22-22,1247-1247[UP3]	.(((((..(((.((((((((((((.&.))))))))))))-)))--))))).	CAGCGAUCAGUGUAACAAGAAUCCC&AGGAUUCUUGUUA-ACU--UUGCUU	0	0	NA	NA	NA	1	30.281	4	0.999756	Output/S0h/cleaveLand_result/t_plot/PC-3p-110122_70_XM_016097900.2_1262_TPlot.pdf	0	30.281	-Inf	down	3.7368e-08	4.29087e-08	yes	NA	NA
PC-3p-110122_70	XM_016100648.2	1940	1962	1953	-32.1	-24.4	0.760125	7	1-2,1962-1961;4-15,1959-1948;16-22,1946-1940	3-3,1960-1960[SIL];x-x,1947-1947[BULt]	(((((((.((((((((((((.((&)).))))))))))))-)))))))	AAGCAGGUGUUGGCAAGAGUGCU&AGGAUUCUUGUUAAC-UUUGCUU	0	0	NA	NA	NA	2	60.562	2	0.369233	Output/S0h/cleaveLand_result/t_plot/PC-3p-110122_70_XM_016100648.2_1953_TPlot.pdf	0	60.562	-Inf	down	7.123e-15	2.99612e-14	yes	NA	NA
PC-3p-110122_70	XM_016100841.2	1889	1914	1901	-32.1	-21.4	0.666667	16.5	2-6,1913-1909;7-12,1904-1899;15-22,1896-1889	1-1,1914-1914[UP5];x-x,1908-1905[BULt];13-14,1898-1897[SIL]	((((((((..((((((....(((((.&.)))))----))))))..))))))))	GAGCAGGGGAGGCAGGCUAUGAUCCG&AGGAUU----CUUGUUAACUUUGCUU	0	0	NA	NA	NA	1	30.281	4	1	Output/S0h/cleaveLand_result/t_plot/PC-3p-110122_70_XM_016100841.2_1901_TPlot.pdf	0	30.281	-Inf	down	3.7368e-08	4.29087e-08	yes	GO:0043170(macromolecule metabolic process);GO:0071840(cellular component organization or biogenesis);GO:0070013(intracellular organelle lumen);GO:0036211(protein modification process);GO:0044446(intracellular organelle part);GO:1901564(organonitrogen compound metabolic process);GO:0019538(protein metabolic process);GO:0044237(cellular metabolic process);GO:0032991(macromolecular complex);GO:0005…	NA
PC-3p-110122_70	XM_016101943.2	325	345	337	-32.1	-22.1	0.688474	7	2-5,344-341;7-12,340-335;15-21,332-326	1-1,345-345[UP5];6-6,x-x[BULq];13-14,334-333[SIL];22-22,325-325[UP3]	.(((((((..((((((-((((.&.)))).))))))..))))))).	CGGCAAGGGCAACAAG-AUCCG&AGGAUUCUUGUUAACUUUGCUU	5	166.522	2	0.964605	Output/S8h/cleaveLand_result/t_plot/PC-3p-110122_70_XM_016101943.2_337_TPlot.pdf	4	121.124	2	0.970781	Output/S0h/cleaveLand_result/t_plot/PC-3p-110122_70_XM_016101943.2_337_TPlot.pdf	166.522	121.124	0.459231	up	0.0074294	0.00798186	yes	GO:0016020(membrane);GO:0044425(membrane part);GO:0016021(integral component of membrane);GO:0031224(intrinsic component of membrane)	ko00190(Oxidative phosphorylation);ko01100(Metabolic pathways)
PC-3p-110122_70	XM_016103578.2	801	824	815	-32.1	-21.3	0.663551	9.5	2-10,823-815;12-13,813-812;14-22,809-801	1-1,824-824[UP5];11-11,814-814[SIL];x-x,811-810[BULt]	(((((((((..((.(((((((((.&.))))))))).))--)))))))))	GAGCAGGGUCUUGUUAAGGAUCCA&AGGAUUCUUGUUA--ACUUUGCUU	1	33.3045	4	1	Output/S8h/cleaveLand_result/t_plot/PC-3p-110122_70_XM_016103578.2_815_TPlot.pdf	1	30.281	4	1	Output/S0h/cleaveLand_result/t_plot/PC-3p-110122_70_XM_016103578.2_815_TPlot.pdf	33.3045	30.281	0.137303	up	0.70456	0.704918	yes	GO:0006629(lipid metabolic process);GO:0008233(peptidase activity);GO:0016787(hydrolase activity);GO:1901575(organic substance catabolic process);GO:0030163(protein catabolic process);GO:0008152(metabolic process);GO:0004175(endopeptidase activity);GO:0043170(macromolecule metabolic process);GO:0003824(catalytic activity);GO:0019538(protein metabolic process);GO:0044238(primary metabolic process)…	NA
PC-3p-110122_70	XM_016105930.2	1381	1402	1393	-32.1	-23.5	0.732087	9	2-2,1401-1401;5-21,1398-1382	1-1,1402-1402[UP5];3-4,1400-1399[SIL];22-22,1381-1381[UP3]	.(((((((((((((((((..(.&.)..))))))))))))))))).	UGGCAAGGUUAACAGGAGCACA&AGGAUUCUUGUUAACUUUGCUU	3	99.9134	2	0.675619	Output/S8h/cleaveLand_result/t_plot/PC-3p-110122_70_XM_016105930.2_1393_TPlot.pdf	4	121.124	2	0.695915	Output/S0h/cleaveLand_result/t_plot/PC-3p-110122_70_XM_016105930.2_1393_TPlot.pdf	99.9134	121.124	-0.277735	down	0.15365	0.163423	yes	GO:0016021(integral component of membrane);GO:0031224(intrinsic component of membrane);GO:0044425(membrane part);GO:0016020(membrane)	ko03013(RNA transport);ko03008(Ribosome biogenesis in eukaryotes)
PC-3p-110122_70	XM_016105931.2	1386	1407	1398	-32.1	-23.5	0.732087	9	2-2,1406-1406;5-21,1403-1387	1-1,1407-1407[UP5];3-4,1405-1404[SIL];22-22,1386-1386[UP3]	.(((((((((((((((((..(.&.)..))))))))))))))))).	UGGCAAGGUUAACAGGAGCACA&AGGAUUCUUGUUAACUUUGCUU	0	0	NA	NA	NA	1	30.281	4	0.957267	Output/S0h/cleaveLand_result/t_plot/PC-3p-110122_70_XM_016105931.2_1398_TPlot.pdf	0	30.281	-Inf	down	3.7368e-08	4.29087e-08	yes	GO:0016021(integral component of membrane);GO:0031224(intrinsic component of membrane);GO:0044425(membrane part);GO:0016020(membrane)	ko03013(RNA transport);ko03008(Ribosome biogenesis in eukaryotes)
PC-3p-110122_70	XM_016105946.2	632	654	644	-32.1	-22.4	0.697819	13.5	2-9,653-646;14-22,640-632	1-1,654-654[UP5];10-13,645-641[AILt]	(((((((((.....((((((((.&.))))))))-....)))))))))	GAGCGAGGUGUUAAGAGAGUCCG&AGGAUUCUU-GUUAACUUUGCUU	3	99.9134	2	0.936254	Output/S8h/cleaveLand_result/t_plot/PC-3p-110122_70_XM_016105946.2_644_TPlot.pdf	2	60.562	3	0.564102	Output/S0h/cleaveLand_result/t_plot/PC-3p-110122_70_XM_016105946.2_644_TPlot.pdf	99.9134	60.562	0.722265	up	0.0018931	0.00207573	yes	GO:0043167(ion binding);GO:0071704(organic substance metabolic process);GO:0004619(phosphoglycerate mutase activity);GO:0044424(intracellular part);GO:0008152(metabolic process);GO:1901575(organic substance catabolic process);GO:0044282(small molecule catabolic process);GO:0016868(intramolecular transferase activity, phosphotransferases);GO:0046914(transition metal ion binding);GO:0009056(catabol…	ko01230(Biosynthesis of amino acids);ko01110(Biosynthesis of secondary metabolites);ko00260(Glycine, serine and threonine metabolism);ko01200(Carbon metabolism);ko00010(Glycolysis / Gluconeogenesis);ko01100(Metabolic pathways)
PC-3p-110122_70	XM_016105947.2	632	654	644	-32.1	-22.4	0.697819	13.5	2-9,653-646;14-22,640-632	1-1,654-654[UP5];10-13,645-641[AILt]	(((((((((.....((((((((.&.))))))))-....)))))))))	GAGCGAGGUGUUAAGAGAGUCCG&AGGAUUCUU-GUUAACUUUGCUU	0	0	NA	NA	NA	2	60.562	3	0.550525	Output/S0h/cleaveLand_result/t_plot/PC-3p-110122_70_XM_016105947.2_644_TPlot.pdf	0	60.562	-Inf	down	7.123e-15	2.99612e-14	yes	GO:0043167(ion binding);GO:0071704(organic substance metabolic process);GO:0004619(phosphoglycerate mutase activity);GO:0044424(intracellular part);GO:0008152(metabolic process);GO:1901575(organic substance catabolic process);GO:0044282(small molecule catabolic process);GO:0016868(intramolecular transferase activity, phosphotransferases);GO:0046914(transition metal ion binding);GO:0009056(catabol…	ko01230(Biosynthesis of amino acids);ko01110(Biosynthesis of secondary metabolites);ko00260(Glycine, serine and threonine metabolism);ko01200(Carbon metabolism);ko00010(Glycolysis / Gluconeogenesis);ko01100(Metabolic pathways)
PC-3p-110122_70	XM_016107246.2	648	670	661	-32.1	-22.32	0.695327	9	1-11,670-660;15-22,655-648	12-14,659-656[AILt]	((((((((....(((((((((((&)))))))))))-...))))))))	AGGUAGGGAGAUACAAGAGUCCU&AGGAUUCUUGU-UAACUUUGCUU	2	66.6089	3	0.557067	Output/S8h/cleaveLand_result/t_plot/PC-3p-110122_70_XM_016107246.2_661_TPlot.pdf	1	30.281	4	0.999867	Output/S0h/cleaveLand_result/t_plot/PC-3p-110122_70_XM_016107246.2_661_TPlot.pdf	66.6089	30.281	1.1373	up	0.00022361	0.000246722	yes	GO:1901566(organonitrogen compound biosynthetic process);GO:0016866(intramolecular transferase activity);GO:0044238(primary metabolic process);GO:1901564(organonitrogen compound metabolic process);GO:0006807(nitrogen compound metabolic process);GO:0046394(carboxylic acid biosynthetic process);GO:0043648(dicarboxylic acid metabolic process);GO:0009073(aromatic amino acid family biosynthetic proces…	ko01110(Biosynthesis of secondary metabolites);ko00400(Phenylalanine, tyrosine and tryptophan biosynthesis);ko01230(Biosynthesis of amino acids);ko01100(Metabolic pathways)
PC-3p-110122_70	XM_016108333.2	1513	1535	1526	-32.1	-21.4	0.666667	7.5	2-9,1534-1527;11-18,1525-1518;19-20,1516-1515	1-1,1535-1535[UP5];10-10,1526-1526[SIL];x-x,1517-1517[BULt];21-22,1514-1513[UP3]	..((.((((((((.((((((((.&.)))))))).))))))))-))..	AUGUGAAAGUUGAGAAGAAUCCA&AGGAUUCUUGUUAACUUU-GCUU	1	33.3045	4	1	Output/S8h/cleaveLand_result/t_plot/PC-3p-110122_70_XM_016108333.2_1526_TPlot.pdf	0	0	NA	NA	NA	33.3045	0	Inf	up	7.8779e-09	1.42259e-08	yes	GO:0043226(organelle);GO:0044464(cell part);GO:0016853(isomerase activity);GO:0044260(cellular macromolecule metabolic process);GO:0008152(metabolic process);GO:0018193(peptidyl-amino acid modification);GO:0000209(protein polyubiquitination);GO:0016740(transferase activity);GO:0006807(nitrogen compound metabolic process);GO:0043170(macromolecule metabolic process);GO:0043412(macromolecule modific…	ko04120(Ubiquitin mediated proteolysis)
PC-3p-110122_70	XM_016109136.2	1097	1117	1108	-32.1	-25.1	0.781931	4	1-13,1117-1105;15-18,1104-1101;20-22,1099-1097	14-14,x-x[BULq];19-19,1100-1100[SIL]	(((.((((-(((((((((((((&))))))))))))).)))).)))	GAGGGAAG-UAGCAAGAAUCCU&AGGAUUCUUGUUAACUUUGCUU	1	33.3045	4	0.544844	Output/S8h/cleaveLand_result/t_plot/PC-3p-110122_70_XM_016109136.2_1108_TPlot.pdf	0	0	NA	NA	NA	33.3045	0	Inf	up	7.8779e-09	1.42259e-08	yes	GO:0032555(purine ribonucleotide binding);GO:0072524(pyridine-containing compound metabolic process);GO:0043167(ion binding);GO:0046496(nicotinamide nucleotide metabolic process);GO:0055082(cellular chemical homeostasis);GO:0019637(organophosphate metabolic process);GO:0055086(nucleobase-containing small molecule metabolic process);GO:0016773(phosphotransferase activity, alcohol group as acceptor…	ko00500(Starch and sucrose metabolism);ko00052(Galactose metabolism);ko01100(Metabolic pathways);ko00051(Fructose and mannose metabolism);ko00010(Glycolysis / Gluconeogenesis);ko00520(Amino sugar and nucleotide sugar metabolism);ko01110(Biosynthesis of secondary metabolites);ko01200(Carbon metabolism)
PC-3p-110122_70	XM_016110039.2	2559	2580	2571	-32.1	-21	0.654206	8.5	1-2,2580-2579;4-12,2577-2569;15-21,2566-2560	3-3,2578-2578[SIL];13-14,2568-2567[SIL];22-22,2559-2559[UP3]	.(((((((..(((((((((.((&)).)))))))))..))))))).	UGGUGAAGGAGGCAAGAAUGCU&AGGAUUCUUGUUAACUUUGCUU	0	0	NA	NA	NA	1	30.281	4	1	Output/S0h/cleaveLand_result/t_plot/PC-3p-110122_70_XM_016110039.2_2571_TPlot.pdf	0	30.281	-Inf	down	3.7368e-08	4.29087e-08	yes	GO:0005488(binding);GO:0046872(metal ion binding);GO:0010556(regulation of macromolecule biosynthetic process);GO:1903506(regulation of nucleic acid-templated transcription);GO:0060255(regulation of macromolecule metabolic process);GO:0031323(regulation of cellular metabolic process);GO:0019219(regulation of nucleobase-containing compound metabolic process);GO:0031326(regulation of cellular biosy…	NA
PC-3p-110122_70	XM_016110193.2	800	821	812	-32.1	-22.48	0.700312	9	2-15,820-807;19-21,803-801	1-1,821-821[UP5];16-18,806-804[SIL];22-22,800-800[UP3]	.(((...((((((((((((((.&.))))))))))))))...))).	UGGUUAUGUUGGCAAGAGUCCA&AGGAUUCUUGUUAACUUUGCUU	0	0	NA	NA	NA	1	30.281	4	0.999681	Output/S0h/cleaveLand_result/t_plot/PC-3p-110122_70_XM_016110193.2_812_TPlot.pdf	0	30.281	-Inf	down	3.7368e-08	4.29087e-08	yes	GO:0016020(membrane);GO:0031224(intrinsic component of membrane);GO:0044425(membrane part);GO:0016021(integral component of membrane)	NA
PC-3p-110122_70	XM_016111434.2	778	806	797	-32.1	-22.8	0.71028	18	2-4,805-803;6-12,801-795;13-22,787-778	1-1,806-806[UP5];5-5,802-802[SIL];x-x,794-788[BULt]	((((((((((.......(((((((.(((.&.))).)))))))-------))))))))))	AAGCAAAGUUGGCUGAGGACAAGAUUCCA&AGGAUUCUUGUU-------AACUUUGCUU	1	33.3045	4	0.997299	Output/S8h/cleaveLand_result/t_plot/PC-3p-110122_70_XM_016111434.2_797_TPlot.pdf	1	30.281	4	0.998003	Output/S0h/cleaveLand_result/t_plot/PC-3p-110122_70_XM_016111434.2_797_TPlot.pdf	33.3045	30.281	0.137303	up	0.70456	0.704918	yes	GO:0034641(cellular nitrogen compound metabolic process);GO:0097159(organic cyclic compound binding);GO:0043229(intracellular organelle);GO:0031428(box C/D snoRNP complex);GO:0044422(organelle part);GO:0044260(cellular macromolecule metabolic process);GO:0044452(nucleolar part);GO:0030515(snoRNA binding);GO:0005732(small nucleolar ribonucleoprotein complex);GO:0034660(ncRNA metabolic process);GO:…	ko03008(Ribosome biogenesis in eukaryotes)
PC-3p-110122_70	XM_016111590.2	955	976	968	-32.1	-21.2	0.660436	8.5	1-3,976-974;5-9,973-969;11-14,967-964;15-22,962-955	4-4,x-x[BULq];10-10,968-968[SIL];x-x,963-963[BULt]	((((((((.((((.(((((-(((&))).))))).))))-))))))))	GAGCAAAGUUUGAGGAGGA-CCU&AGGAUUCUUGUUAA-CUUUGCUU	1	33.3045	4	1	Output/S8h/cleaveLand_result/t_plot/PC-3p-110122_70_XM_016111590.2_968_TPlot.pdf	0	0	NA	NA	NA	33.3045	0	Inf	up	7.8779e-09	1.42259e-08	yes	GO:1901265(nucleoside phosphate binding);GO:0008152(metabolic process);GO:0016491(oxidoreductase activity);GO:0036094(small molecule binding);GO:0005488(binding);GO:0003824(catalytic activity);GO:0097159(organic cyclic compound binding);GO:0048037(cofactor binding);GO:0055114(oxidation-reduction process);GO:0000166(nucleotide binding);GO:0016614(oxidoreductase activity, acting on CH-OH group of d…	ko01200(Carbon metabolism);ko00630(Glyoxylate and dicarboxylate metabolism);ko01100(Metabolic pathways)
PC-3p-110122_70	XM_016111734.2	3180	3201	3192	-32.1	-28.6	0.890966	4	1-12,3201-3190;15-22,3187-3180	13-14,3189-3188[SIL]	((((((((..((((((((((((&))))))))))))..))))))))	GGGCAAAGGCAGCAAGAAUCCU&AGGAUUCUUGUUAACUUUGCUU	1	33.3045	4	0.0815735	Output/S8h/cleaveLand_result/t_plot/PC-3p-110122_70_XM_016111734.2_3192_TPlot.pdf	0	0	NA	NA	NA	33.3045	0	Inf	up	7.8779e-09	1.42259e-08	yes	GO:0005622(intracellular);GO:0007154(cell communication);GO:0044464(cell part);GO:0051345(positive regulation of hydrolase activity);GO:0043085(positive regulation of catalytic activity);GO:0050896(response to stimulus);GO:0065007(biological regulation);GO:0050794(regulation of cellular process);GO:0005623(cell);GO:0007264(small GTPase mediated signal transduction);GO:0065009(regulation of molecu…	NA
PC-3p-110122_70	XM_016112623.2	1903	1929	1917	-32.1	-21.1	0.657321	10	2-6,1928-1924;7-16,1920-1911;17-22,1908-1903	1-1,1929-1929[UP5];x-x,1923-1921[BULt];x-x,1910-1909[BULt]	((((((..((((((((((...(((((.&.)))))---))))))))))--))))))	AAGCAACCAGUUAACAGGUGAAAUCCC&AGGAUU---CUUGUUAACU--UUGCUU	0	0	NA	NA	NA	1	30.281	4	1	Output/S0h/cleaveLand_result/t_plot/PC-3p-110122_70_XM_016112623.2_1917_TPlot.pdf	0	30.281	-Inf	down	3.7368e-08	4.29087e-08	yes	GO:0016772(transferase activity, transferring phosphorus-containing groups);GO:0016310(phosphorylation);GO:0016021(integral component of membrane);GO:0044425(membrane part);GO:1901265(nucleoside phosphate binding);GO:0019538(protein metabolic process);GO:0003824(catalytic activity);GO:0032555(purine ribonucleotide binding);GO:0016773(phosphotransferase activity, alcohol group as acceptor);GO:1901…	NA
PC-3p-110122_70	XM_016113004.2	504	527	518	-32.1	-22.2	0.691589	6	1-9,527-519;11-14,517-514;15-19,512-508;20-22,506-504	10-10,518-518[SIL];x-x,513-513[BULt];x-x,507-507[BULt]	(((.(((((.((((.(((((((((&))))))))).))))-)))))-)))	GAGUCAGAGAUUAAGAAGGAUCCU&AGGAUUCUUGUUAA-CUUUG-CUU	0	0	NA	NA	NA	1	30.281	4	0.999933	Output/S0h/cleaveLand_result/t_plot/PC-3p-110122_70_XM_016113004.2_518_TPlot.pdf	0	30.281	-Inf	down	3.7368e-08	4.29087e-08	yes	GO:0005623(cell);GO:0044464(cell part);GO:0016020(membrane)	ko03060(Protein export)
PC-3p-110122_70	XM_016113208.2	307	328	319	-32.1	-26.4	0.82243	6	2-4,327-325;7-22,322-307	1-1,328-328[UP5];5-6,324-323[SIL]	((((((((((((((((..(((.&.)))..))))))))))))))))	GAGCAAGGUUAACAAGCCUCCG&AGGAUUCUUGUUAACUUUGCUU	1	33.3045	4	0.386937	Output/S8h/cleaveLand_result/t_plot/PC-3p-110122_70_XM_016113208.2_319_TPlot.pdf	6	181.686	2	0.161924	Output/S0h/cleaveLand_result/t_plot/PC-3p-110122_70_XM_016113208.2_319_TPlot.pdf	33.3045	181.686	-2.44766	down	4.4901e-24	9.95792e-23	yes	GO:0009058(biosynthetic process);GO:0009987(cellular process);GO:0006518(peptide metabolic process);GO:0043603(cellular amide metabolic process);GO:0010467(gene expression);GO:1901564(organonitrogen compound metabolic process);GO:0043228(non-membrane-bounded organelle);GO:0030529(intracellular ribonucleoprotein complex);GO:0044237(cellular metabolic process);GO:0032991(macromolecular complex);GO:…	ko03010(Ribosome)
PC-3p-110122_70	XM_016113373.2	2364	2395	2376	-32.1	-22.7	0.707165	25	1-8,2395-2388;9-22,2377-2364	x-x,2387-2378[BULt]	((((((((((((((..........((((((((&))))))))----------))))))))))))))	AAGUAAGGUUGGCAAACUUGGGAAGGAGUCCU&AGGAUUCU----------UGUUAACUUUGCUU	0	0	NA	NA	NA	1	30.281	4	0.998779	Output/S0h/cleaveLand_result/t_plot/PC-3p-110122_70_XM_016113373.2_2376_TPlot.pdf	0	30.281	-Inf	down	3.7368e-08	4.29087e-08	yes	GO:0044464(cell part);GO:0006810(transport);GO:0022857(transmembrane transporter activity);GO:0051179(localization);GO:0015103(inorganic anion transmembrane transporter activity);GO:0055085(transmembrane transport);GO:0055080(cation homeostasis);GO:0016020(membrane);GO:0005887(integral component of plasma membrane);GO:0042592(homeostatic process);GO:0031226(intrinsic component of plasma membrane)…	NA
PC-3p-110122_70	XM_016113492.2	1079	1101	1092	-32.1	-22.4	0.697819	8	1-11,1101-1091;12-15,1088-1085;18-22,1083-1079	x-x,1090-1089[BULt];16-17,1084-1084[AILq]	(((((.-((((..(((((((((((&)))))))))))--))))..)))))	AAGCAU-GUUGGAGCAAGAAUCCU&AGGAUUCUUGU--UAACUUUGCUU	0	0	NA	NA	NA	2	60.562	2	0.946809	Output/S0h/cleaveLand_result/t_plot/PC-3p-110122_70_XM_016113492.2_1092_TPlot.pdf	0	60.562	-Inf	down	7.123e-15	2.99612e-14	yes	GO:1901575(organic substance catabolic process);GO:0004553(hydrolase activity, hydrolyzing O-glycosyl compounds);GO:0008810(cellulase activity);GO:0005975(carbohydrate metabolic process);GO:0000272(polysaccharide catabolic process);GO:0009057(macromolecule catabolic process);GO:0009251(glucan catabolic process);GO:0044248(cellular catabolic process);GO:0009987(cellular process);GO:0044247(cellula…	ko01100(Metabolic pathways);ko00500(Starch and sucrose metabolism)
PC-3p-110122_70	XM_016113979.2	1138	1160	1150	-32.1	-26	0.809969	6	2-9,1159-1152;10-21,1150-1139	1-1,1160-1160[UP5];x-x,1151-1151[BULt];22-22,1138-1138[UP3]	.((((((((((((.((((((((.&.))))))))-)))))))))))).	UGGCAGAGUUAAUGAAGAAUCCA&AGGAUUCUU-GUUAACUUUGCUU	0	0	NA	NA	NA	1	30.281	4	0.488703	Output/S0h/cleaveLand_result/t_plot/PC-3p-110122_70_XM_016113979.2_1150_TPlot.pdf	0	30.281	-Inf	down	3.7368e-08	4.29087e-08	yes	GO:0055114(oxidation-reduction process);GO:0016020(membrane);GO:0044550(secondary metabolite biosynthetic process);GO:1901363(heterocyclic compound binding);GO:0046906(tetrapyrrole binding);GO:0016709(oxidoreductase activity, acting on paired donors, with incorporation or reduction of molecular oxygen, NAD(P)H as one donor, and incorporation of one atom of oxygen);GO:0046872(metal ion binding);GO…	ko01100(Metabolic pathways);ko00943(Isoflavonoid biosynthesis)
PC-3p-110122_70	XM_016116247.2	616	638	629	-32.1	-21.4	0.666667	10	4-16,635-623;17-22,621-616	1-3,638-636[UP5];x-x,622-622[BULt]	((((((.(((((((((((((...&...)))))))))))))-))))))	AGGCAGAAGUUGACGAGGAUAAA&AGGAUUCUUGUUAACU-UUGCUU	0	0	NA	NA	NA	2	60.562	3	0.837365	Output/S0h/cleaveLand_result/t_plot/PC-3p-110122_70_XM_016116247.2_629_TPlot.pdf	0	60.562	-Inf	down	7.123e-15	2.99612e-14	yes	NA	NA
PC-3p-110122_70	XM_016117788.2	452	474	465	-32.1	-23.9	0.744548	9	2-4,473-471;6-19,469-456;20-22,454-452	1-1,474-474[UP5];5-5,470-470[SIL];x-x,455-455[BULt]	(((.((((((((((((((.(((.&.))).))))))))))))))-)))	GAGACAGAGUUGGCGAGGCUCCA&AGGAUUCUUGUUAACUUUG-CUU	2	66.6089	3	0.172882	Output/S8h/cleaveLand_result/t_plot/PC-3p-110122_70_XM_016117788.2_465_TPlot.pdf	3	90.843	2	0.51045	Output/S0h/cleaveLand_result/t_plot/PC-3p-110122_70_XM_016117788.2_465_TPlot.pdf	66.6089	90.843	-0.44766	down	0.053435	0.0570321	yes	GO:0016020(membrane)	NA
PC-3p-110122_70	XM_016117789.2	491	513	504	-32.1	-23.9	0.744548	9	2-4,512-510;6-19,508-495;20-22,493-491	1-1,513-513[UP5];5-5,509-509[SIL];x-x,494-494[BULt]	(((.((((((((((((((.(((.&.))).))))))))))))))-)))	GAGACAGAGUUGGCGAGGCUCCA&AGGAUUCUUGUUAACUUUG-CUU	0	0	NA	NA	NA	4	121.124	2	0.502872	Output/S0h/cleaveLand_result/t_plot/PC-3p-110122_70_XM_016117789.2_504_TPlot.pdf	0	121.124	-Inf	down	3.5765e-28	8.25153e-27	yes	GO:0016020(membrane)	NA
PC-3p-110122_70	XM_021128237.1	1692	1719	1710	-32.1	-21.3	0.663551	9.5	2-12,1718-1708;14-16,1706-1704;17-22,1697-1692	1-1,1719-1719[UP5];13-13,1707-1707[SIL];x-x,1703-1698[BULt]	((((((......(((.(((((((((((.&.))))))))))).)))------))))))	AAGCAAGAAAACGGUAAACAAGGAUCCC&AGGAUUCUUGUUAACU------UUGCUU	0	0	NA	NA	NA	1	30.281	4	1	Output/S0h/cleaveLand_result/t_plot/PC-3p-110122_70_XM_021128237.1_1710_TPlot.pdf	0	30.281	-Inf	down	3.7368e-08	4.29087e-08	yes	GO:0043229(intracellular organelle);GO:0090304(nucleic acid metabolic process);GO:0034645(cellular macromolecule biosynthetic process);GO:0006259(DNA metabolic process);GO:0044249(cellular biosynthetic process);GO:0009059(macromolecule biosynthetic process);GO:0005623(cell);GO:0071704(organic substance metabolic process);GO:1901360(organic cyclic compound metabolic process);GO:0006139(nucleobase-…	ko03410(Base excision repair);ko00240(Pyrimidine metabolism);ko03030(DNA replication);ko03430(Mismatch repair);ko01100(Metabolic pathways);ko03440(Homologous recombination);ko03420(Nucleotide excision repair);ko00230(Purine metabolism)
PC-3p-110122_70	XM_021128836.1	2117	2141	2132	-32.1	-21.2	0.660436	10.5	2-17,2140-2125;18-21,2121-2118	1-1,2141-2141[UP5];x-x,2124-2122[BULt];22-22,2117-2117[UP3]	.((((...((((((((((((((((.&.))))))))))))))))---)))).	UAGUACUGGGGUUGGCAAGAGUCUC&AGGAUUCUUGUUAACUU---UGCUU	0	0	NA	NA	NA	1	30.281	4	1	Output/S0h/cleaveLand_result/t_plot/PC-3p-110122_70_XM_021128836.1_2132_TPlot.pdf	0	30.281	-Inf	down	3.7368e-08	4.29087e-08	yes	GO:2000112(regulation of cellular macromolecule biosynthetic process);GO:0044464(cell part);GO:0051246(regulation of protein metabolic process);GO:0044248(cellular catabolic process);GO:0043228(non-membrane-bounded organelle);GO:0005737(cytoplasm);GO:0019439(aromatic compound catabolic process);GO:0006139(nucleobase-containing compound metabolic process);GO:0043170(macromolecule metabolic process…	ko03018(RNA degradation)
PC-3p-110122_70	XM_021129987.1	798	820	811	-32.1	-21	0.654206	7	2-7,819-814;9-12,812-809;15-15,806-806;16-22,804-798	1-1,820-820[UP5];8-8,813-813[SIL];13-14,808-807[SIL];x-x,805-805[BULt]	(((((((.(..((((.((((((.&.)))))).))))..)-)))))))	AAGCAAAUGGUGACAUGAAUCCA&AGGAUUCUUGUUAAC-UUUGCUU	0	0	NA	NA	NA	1	30.281	4	1	Output/S0h/cleaveLand_result/t_plot/PC-3p-110122_70_XM_021129987.1_811_TPlot.pdf	0	30.281	-Inf	down	3.7368e-08	4.29087e-08	yes	NA	NA
PC-3p-110122_70	XM_021131353.1	1241	1263	1254	-32.1	-23.2	0.722741	4.5	1-14,1263-1250;15-22,1248-1241	x-x,1249-1249[BULt]	((((((((.((((((((((((((&))))))))))))))-))))))))	AAGCAAGGAUUAACAAGGAUUUU&AGGAUUCUUGUUAA-CUUUGCUU	0	0	NA	NA	NA	2	60.562	2	0.788053	Output/S0h/cleaveLand_result/t_plot/PC-3p-110122_70_XM_021131353.1_1254_TPlot.pdf	0	60.562	-Inf	down	7.123e-15	2.99612e-14	yes	GO:0006518(peptide metabolic process);GO:0016875(ligase activity, forming carbon-oxygen bonds);GO:0043043(peptide biosynthetic process);GO:0036094(small molecule binding);GO:0044249(cellular biosynthetic process);GO:0043168(anion binding);GO:0009058(biosynthetic process);GO:0043038(amino acid activation);GO:0044281(small molecule metabolic process);GO:1901576(organic substance biosynthetic proces…	ko00970(Aminoacyl-tRNA biosynthesis)
PC-3p-110122_70	XM_021131963.1	2152	2174	2164	-32.1	-22.7	0.707165	8.5	2-3,2173-2172;4-19,2170-2155	1-1,2174-2174[UP5];x-x,2171-2171[BULt];20-22,2154-2152[UP3]	...((((((((((((((((.((.&.))-))))))))))))))))...	UACCAGAGUUGGCAAGAAUGCCA&AGG-AUUCUUGUUAACUUUGCUU	1	33.3045	4	0.998197	Output/S8h/cleaveLand_result/t_plot/PC-3p-110122_70_XM_021131963.1_2164_TPlot.pdf	2	60.562	2	0.897823	Output/S0h/cleaveLand_result/t_plot/PC-3p-110122_70_XM_021131963.1_2164_TPlot.pdf	33.3045	60.562	-0.862697	down	0.0049011	0.0052713	yes	GO:0030522(intracellular receptor signaling pathway);GO:0060089(molecular transducer activity);GO:0065007(biological regulation);GO:0004872(receptor activity);GO:0003904(deoxyribodipyrimidine photo-lyase activity);GO:0071483(cellular response to blue light);GO:0071214(cellular response to abiotic stimulus);GO:0016830(carbon-carbon lyase activity);GO:0004871(signal transducer activity);GO:0009314(…	ko04712(Circadian rhythm - plant)
PC-3p-110122_70	XM_021132260.1	1327	1347	1339	-32.1	-22.8	0.71028	10.5	2-8,1346-1340;11-21,1338-1328	1-1,1347-1347[UP5];9-10,1339-1339[AILq];22-22,1327-1327[UP3]	.(((((((((((.-(((((((.&.)))))))..))))))))))).	UGGCGAGGUUGAG-GGAGUCCC&AGGAUUCUUGUUAACUUUGCUU	1	33.3045	4	0.997411	Output/S8h/cleaveLand_result/t_plot/PC-3p-110122_70_XM_021132260.1_1339_TPlot.pdf	0	0	NA	NA	NA	33.3045	0	Inf	up	7.8779e-09	1.42259e-08	yes	GO:0003677(DNA binding);GO:0009987(cellular process);GO:0051301(cell division);GO:0097159(organic cyclic compound binding);GO:0003676(nucleic acid binding);GO:1901363(heterocyclic compound binding);GO:0005488(binding)	ko03040(Spliceosome)
PC-3p-110122_70	XM_021139641.1	459	480	471	-32.1	-26.6	0.82866	7.5	1-1,480-480;3-22,478-459	2-2,479-479[SIL]	((((((((((((((((((((.(&).))))))))))))))))))))	GAGCAGGGUUGGCAAGGAUUGU&AGGAUUCUUGUUAACUUUGCUU	1	33.3045	4	0.346535	Output/S8h/cleaveLand_result/t_plot/PC-3p-110122_70_XM_021139641.1_471_TPlot.pdf	0	0	NA	NA	NA	33.3045	0	Inf	up	7.8779e-09	1.42259e-08	yes	GO:0034641(cellular nitrogen compound metabolic process);GO:0009058(biosynthetic process);GO:0010467(gene expression);GO:0006412(translation);GO:0044425(membrane part);GO:0051234(establishment of localization);GO:0006807(nitrogen compound metabolic process);GO:0006810(transport);GO:0006518(peptide metabolic process);GO:0044238(primary metabolic process);GO:0071704(organic substance metabolic proc…	NA
PC-3p-110122_70	XM_021139784.1	667	690	679	-32.1	-26	0.809969	6.5	1-3,690-688;4-21,685-668	x-x,687-686[BULt];22-22,667-667[UP3]	.((((((((((((((((((..(((&)))--)))))))))))))))))).	CGGCGAGGUUAACAAGAAUGACCU&AGG--AUUCUUGUUAACUUUGCUU	2	66.6089	2	0.189935	Output/S8h/cleaveLand_result/t_plot/PC-3p-110122_70_XM_021139784.1_679_TPlot.pdf	0	0	NA	NA	NA	66.6089	0	Inf	up	3.3071e-16	2.0359e-15	yes	GO:0043492(ATPase activity, coupled to movement of substances);GO:0043229(intracellular organelle);GO:0051234(establishment of localization);GO:0017111(nucleoside-triphosphatase activity);GO:0042623(ATPase activity, coupled);GO:0043231(intracellular membrane-bounded organelle);GO:0044422(organelle part);GO:0098805(whole membrane);GO:0044437(vacuolar part);GO:0044464(cell part);GO:0005773(vacuole)…	ko04145(Phagosome);ko01100(Metabolic pathways);ko00190(Oxidative phosphorylation)
PC-3p-110122_70	XM_021141082.1	821	843	833	-32.1	-22.3	0.694704	9.5	2-2,842-842;5-22,838-821	1-1,843-843[UP5];3-4,841-839[AILt]	((((((((((((((((((...(.&.)-..))))))))))))))))))	GAGUGAAGUUGACAAGAAGCACA&AG-GAUUCUUGUUAACUUUGCUU	1	33.3045	4	0.999844	Output/S8h/cleaveLand_result/t_plot/PC-3p-110122_70_XM_021141082.1_833_TPlot.pdf	0	0	NA	NA	NA	33.3045	0	Inf	up	7.8779e-09	1.42259e-08	yes	GO:0043933(macromolecular complex subunit organization);GO:0044464(cell part);GO:0006461(protein complex assembly);GO:0022607(cellular component assembly);GO:0009987(cellular process);GO:0005829(cytosol);GO:0071840(cellular component organization or biogenesis);GO:0044424(intracellular part);GO:0005622(intracellular);GO:0044085(cellular component biogenesis);GO:0034622(cellular macromolecular com…	NA
PC-3p-110122_70	XM_021141083.1	821	843	833	-32.1	-22.3	0.694704	9.5	2-2,842-842;5-22,838-821	1-1,843-843[UP5];3-4,841-839[AILt]	((((((((((((((((((...(.&.)-..))))))))))))))))))	GAGUGAAGUUGACAAGAAGCACA&AG-GAUUCUUGUUAACUUUGCUU	0	0	NA	NA	NA	1	30.281	4	0.999888	Output/S0h/cleaveLand_result/t_plot/PC-3p-110122_70_XM_021141083.1_833_TPlot.pdf	0	30.281	-Inf	down	3.7368e-08	4.29087e-08	yes	GO:0043933(macromolecular complex subunit organization);GO:0044464(cell part);GO:0006461(protein complex assembly);GO:0022607(cellular component assembly);GO:0009987(cellular process);GO:0005829(cytosol);GO:0071840(cellular component organization or biogenesis);GO:0044424(intracellular part);GO:0005622(intracellular);GO:0044085(cellular component biogenesis);GO:0034622(cellular macromolecular com…	NA
PC-3p-110122_70	XM_021141084.1	821	843	833	-32.1	-22.3	0.694704	9.5	2-2,842-842;5-22,838-821	1-1,843-843[UP5];3-4,841-839[AILt]	((((((((((((((((((...(.&.)-..))))))))))))))))))	GAGUGAAGUUGACAAGAAGCACA&AG-GAUUCUUGUUAACUUUGCUU	1	33.3045	4	0.99983	Output/S8h/cleaveLand_result/t_plot/PC-3p-110122_70_XM_021141084.1_833_TPlot.pdf	0	0	NA	NA	NA	33.3045	0	Inf	up	7.8779e-09	1.42259e-08	yes	GO:0043933(macromolecular complex subunit organization);GO:0044464(cell part);GO:0006461(protein complex assembly);GO:0022607(cellular component assembly);GO:0009987(cellular process);GO:0005829(cytosol);GO:0071840(cellular component organization or biogenesis);GO:0044424(intracellular part);GO:0005622(intracellular);GO:0044085(cellular component biogenesis);GO:0034622(cellular macromolecular com…	NA
PC-3p-110122_70	XM_021141085.1	821	843	833	-32.1	-22.3	0.694704	9.5	2-2,842-842;5-22,838-821	1-1,843-843[UP5];3-4,841-839[AILt]	((((((((((((((((((...(.&.)-..))))))))))))))))))	GAGUGAAGUUGACAAGAAGCACA&AG-GAUUCUUGUUAACUUUGCUU	0	0	NA	NA	NA	1	30.281	4	0.999881	Output/S0h/cleaveLand_result/t_plot/PC-3p-110122_70_XM_021141085.1_833_TPlot.pdf	0	30.281	-Inf	down	3.7368e-08	4.29087e-08	yes	GO:0043933(macromolecular complex subunit organization);GO:0044464(cell part);GO:0006461(protein complex assembly);GO:0022607(cellular component assembly);GO:0009987(cellular process);GO:0005829(cytosol);GO:0071840(cellular component organization or biogenesis);GO:0044424(intracellular part);GO:0005622(intracellular);GO:0044085(cellular component biogenesis);GO:0034622(cellular macromolecular com…	NA
PC-3p-110122_70	XM_021142729.1	800	821	812	-32.1	-22.48	0.700312	9	2-15,820-807;19-21,803-801	1-1,821-821[UP5];16-18,806-804[SIL];22-22,800-800[UP3]	.(((...((((((((((((((.&.))))))))))))))...))).	UGGUUAUGUUGGCAAGAGUCCA&AGGAUUCUUGUUAACUUUGCUU	1	33.3045	4	0.999538	Output/S8h/cleaveLand_result/t_plot/PC-3p-110122_70_XM_021142729.1_812_TPlot.pdf	0	0	NA	NA	NA	33.3045	0	Inf	up	7.8779e-09	1.42259e-08	yes	GO:0016020(membrane);GO:0031224(intrinsic component of membrane);GO:0044425(membrane part);GO:0016021(integral component of membrane)	NA
PC-3p-110122_70	XM_021143833.1	1361	1386	1377	-32.1	-22	0.685358	9	1-14,1386-1373;15-16,1371-1370;17-20,1366-1363	x-x,1372-1372[BULt];x-x,1369-1367[BULt];21-22,1362-1361[UP3]	..((((...((.((((((((((((((&))))))))))))))-))---))))..	AUGCGAACGGGAUUGACAAGGAUCCU&AGGAUUCUUGUUAA-CU---UUGCUU	0	0	NA	NA	NA	1	30.281	4	0.999981	Output/S0h/cleaveLand_result/t_plot/PC-3p-110122_70_XM_021143833.1_1377_TPlot.pdf	0	30.281	-Inf	down	3.7368e-08	4.29087e-08	yes	GO:0016875(ligase activity, forming carbon-oxygen bonds);GO:0043604(amide biosynthetic process);GO:0006520(cellular amino acid metabolic process);GO:0009058(biosynthetic process);GO:0005488(binding);GO:0032555(purine ribonucleotide binding);GO:0044260(cellular macromolecule metabolic process);GO:0044249(cellular biosynthetic process);GO:0043603(cellular amide metabolic process);GO:0006082(organic…	ko00970(Aminoacyl-tRNA biosynthesis)
PC-3p-110421_70	XM_016082081.2	724	748	739	-39	-26.4	0.676923	11.5	3-3,746-746;5-10,744-739;12-23,736-725	1-2,748-747[UP5];4-4,745-745[SIL];11-11,738-737[AILt];24-24,724-724[UP3]	.((((((((((((..((((((.(..&..).))))))-.)))))))))))).	UGUCAUCAGAUUUUUGUCACUGGGG&UACGAGUGAC-UGAAUUUGAUGACU	0	0	NA	NA	NA	1	30.281	4	0.388551	Output/S0h/cleaveLand_result/t_plot/PC-3p-110421_70_XM_016082081.2_739_TPlot.pdf	0	30.281	-Inf	down	3.7368e-08	4.29087e-08	yes	NA	NA
PC-3p-110421_70	XM_016086066.2	462	487	477	-39	-27.6	0.707692	10	4-9,484-479;10-10,477-477;11-24,475-462	1-3,487-485[UP5];x-x,478-478[BULt];x-x,476-476[BULt]	((((((((((((((.(.((((((...&...))))))-)-))))))))))))))	AGUCAUCAAAUUCAUGCUCGCUCAUU&UACGAGUGA-C-UGAAUUUGAUGACU	1	33.3045	4	0.225301	Output/S8h/cleaveLand_result/t_plot/PC-3p-110421_70_XM_016086066.2_477_TPlot.pdf	0	0	NA	NA	NA	33.3045	0	Inf	up	7.8779e-09	1.42259e-08	yes	NA	NA
PC-3p-110421_70	XM_016086067.2	462	487	477	-39	-27.6	0.707692	10	4-9,484-479;10-10,477-477;11-24,475-462	1-3,487-485[UP5];x-x,478-478[BULt];x-x,476-476[BULt]	((((((((((((((.(.((((((...&...))))))-)-))))))))))))))	AGUCAUCAAAUUCAUGCUCGCUCAUU&UACGAGUGA-C-UGAAUUUGAUGACU	2	66.6089	2	0.0767896	Output/S8h/cleaveLand_result/t_plot/PC-3p-110421_70_XM_016086067.2_477_TPlot.pdf	0	0	NA	NA	NA	66.6089	0	Inf	up	3.3071e-16	2.0359e-15	yes	NA	NA
PC-3p-110421_70	XM_016104157.2	603	624	615	-39	-27.6	0.707692	4.5	1-17,624-608;20-24,607-603	18-19,x-x[BULq]	(((((--(((((((((((((((((&)))))))))))))))))..)))))	GGUCG--AAAUUCAGUCACUUGUG&UACGAGUGACUGAAUUUGAUGACU	0	0	NA	NA	NA	2	60.562	3	0.0280798	Output/S0h/cleaveLand_result/t_plot/PC-3p-110421_70_XM_016104157.2_615_TPlot.pdf	0	60.562	-Inf	down	7.123e-15	2.99612e-14	yes	NA	NA
PC-3p-110449_70	BGI_novel_T006116	973	996	987	-37.9	-29.2	0.770449	5	1-13,996-984;15-24,982-973	14-14,983-983[SIL]	((((((((((.(((((((((((((&))))))))))))).))))))))))	GGUGUAAUUGUCUUUAUGUGAAGU&AUUUUACAUGAAGUCGAUUGCACC	1	33.3045	4	0.590771	Output/S8h/cleaveLand_result/t_plot/PC-3p-110449_70_BGI_novel_T006116_987_TPlot.pdf	0	0	NA	NA	NA	33.3045	0	Inf	up	7.8779e-09	1.42259e-08	yes	GO:0008152(metabolic process)	NA
PC-3p-110449_70	BGI_novel_T011749	2211	2235	2226	-37.9	-27.6	0.728232	5	2-19,2234-2217;22-24,2213-2211	1-1,2235-2235[UP5];20-21,2216-2214[AILt]	(((...((((((((((((((((((.&.))))))))))))))))))-..)))	GGUAAAAAUCGACUUCAUGUAAAGG&AUUUUACAUGAAGUCGAUU-GCACC	0	0	NA	NA	NA	1	30.281	4	0.776452	Output/S0h/cleaveLand_result/t_plot/PC-3p-110449_70_BGI_novel_T011749_2226_TPlot.pdf	0	30.281	-Inf	down	3.7368e-08	4.29087e-08	yes	NA	NA
PC-3p-110449_70	XM_016091348.2	353	380	367	-37.9	-27.78	0.732982	12.5	1-7,380-374;9-23,368-354	8-8,373-369[AILt];24-24,353-353[UP3]	.(((((((((((((((.....(((((((&)))))))----.))))))))))))))).	CGUGCGAUCGACUUCACCGUCGUGAAAU&AUUUUAC----AUGAAGUCGAUUGCACC	1	33.3045	4	0.732583	Output/S8h/cleaveLand_result/t_plot/PC-3p-110449_70_XM_016091348.2_367_TPlot.pdf	0	0	NA	NA	NA	33.3045	0	Inf	up	7.8779e-09	1.42259e-08	yes	NA	ko01110(Biosynthesis of secondary metabolites);ko00906(Carotenoid biosynthesis);ko01100(Metabolic pathways)
PC-3p-110449_70	XM_016107444.2	403	428	419	-37.9	-25.58	0.674934	12	1-4,428-425;7-15,422-414;18-24,409-403	5-6,424-423[SIL];16-17,413-410[AILt]	(((((((....(((((((((..((((&))))..)))))))))--..)))))))	GGUGCGAGGAGGGCUUCGUGGAGGAU&AUUUUACAUGAAGUC--GAUUGCACC	1	33.3045	4	0.942192	Output/S8h/cleaveLand_result/t_plot/PC-3p-110449_70_XM_016107444.2_419_TPlot.pdf	0	0	NA	NA	NA	33.3045	0	Inf	up	7.8779e-09	1.42259e-08	yes	GO:0005515(protein binding);GO:0005488(binding);GO:0019904(protein domain specific binding)	NA
PC-3p-110449_70	XM_016108540.2	384	413	404	-37.9	-27.3	0.720317	17	6-18,408-396;19-24,389-384	1-5,413-409[UP5];x-x,395-390[BULt]	((((((......(((((((((((((.....&.....)))))))))))))------))))))	GGUGCGUCGCUCGUCGACUUCGUGUUCCUC&AUUUUACAUGAAGUCGAU------UGCACC	0	0	NA	NA	NA	2	60.562	3	0.142181	Output/S0h/cleaveLand_result/t_plot/PC-3p-110449_70_XM_016108540.2_404_TPlot.pdf	0	60.562	-Inf	down	7.123e-15	2.99612e-14	yes	GO:0005740(mitochondrial envelope);GO:0022900(electron transport chain);GO:0019866(organelle inner membrane);GO:0019752(carboxylic acid metabolic process);GO:0044237(cellular metabolic process);GO:0000104(succinate dehydrogenase activity);GO:0043436(oxoacid metabolic process);GO:0050662(coenzyme binding);GO:0044429(mitochondrial part);GO:1901363(heterocyclic compound binding);GO:0031090(organelle…	ko01200(Carbon metabolism);ko00190(Oxidative phosphorylation);ko01100(Metabolic pathways);ko00020(Citrate cycle (TCA cycle));ko01110(Biosynthesis of secondary metabolites)
PC-3p-110481_70	XM_016098458.2	1723	1746	1738	-42.3	-28.1	0.664303	7.5	2-8,1745-1739;10-16,1738-1732;17-23,1730-1724	1-1,1746-1746[UP5];9-9,x-x[BULq];x-x,1731-1731[BULt];24-24,1723-1723[UP3]	.(((((((.(((((((-(((((((.&.))))))).)))))))-))))))).	CUUCAGGUAGCAGAUG-UUUUGCGC&ACGUAAAAUCGUCUGC-ACCUGAGU	3	99.9134	1	0.018062	Output/S8h/cleaveLand_result/t_plot/PC-3p-110481_70_XM_016098458.2_1738_TPlot.pdf	0	0	NA	NA	NA	99.9134	0	Inf	up	1.5881e-23	2.42062e-22	yes	GO:0016043(cellular component organization);GO:0032502(developmental process);GO:0048856(anatomical structure development);GO:0048869(cellular developmental process);GO:0009987(cellular process);GO:0009653(anatomical structure morphogenesis);GO:0071840(cellular component organization or biogenesis);GO:0000902(cell morphogenesis);GO:0032989(cellular component morphogenesis)	ko03040(Spliceosome)
PC-3p-110481_70	XM_016098459.2	1710	1733	1725	-42.3	-28.1	0.664303	7.5	2-8,1732-1726;10-16,1725-1719;17-23,1717-1711	1-1,1733-1733[UP5];9-9,x-x[BULq];x-x,1718-1718[BULt];24-24,1710-1710[UP3]	.(((((((.(((((((-(((((((.&.))))))).)))))))-))))))).	CUUCAGGUAGCAGAUG-UUUUGCGC&ACGUAAAAUCGUCUGC-ACCUGAGU	0	0	NA	NA	NA	1	30.281	4	0.542787	Output/S0h/cleaveLand_result/t_plot/PC-3p-110481_70_XM_016098459.2_1725_TPlot.pdf	0	30.281	-Inf	down	3.7368e-08	4.29087e-08	yes	GO:0016043(cellular component organization);GO:0032502(developmental process);GO:0048856(anatomical structure development);GO:0048869(cellular developmental process);GO:0009987(cellular process);GO:0009653(anatomical structure morphogenesis);GO:0071840(cellular component organization or biogenesis);GO:0000902(cell morphogenesis);GO:0032989(cellular component morphogenesis)	ko03040(Spliceosome)
PC-3p-110481_70	XM_016116985.2	1601	1624	1615	-42.3	-27.6	0.652482	17.5	10-24,1615-1601	1-9,1624-1616[UP5]	(((((((((((((((.........&.........)))))))))))))))	AUUCAGGUGCAGACGUUAAAGUAA&ACGUAAAAUCGUCUGCACCUGAGU	2	66.6089	2	0.348543	Output/S8h/cleaveLand_result/t_plot/PC-3p-110481_70_XM_016116985.2_1615_TPlot.pdf	0	0	NA	NA	NA	66.6089	0	Inf	up	3.3071e-16	2.0359e-15	yes	GO:0004672(protein kinase activity);GO:0006793(phosphorus metabolic process);GO:1901265(nucleoside phosphate binding);GO:0006468(protein phosphorylation);GO:0018209(peptidyl-serine modification);GO:0005622(intracellular);GO:0051716(cellular response to stimulus);GO:0006796(phosphate-containing compound metabolic process);GO:0005623(cell);GO:0043168(anion binding);GO:0007154(cell communication);GO…	NA
PC-3p-113847_67	XM_016081231.2	473	497	488	-42.2	-30.7	0.727488	6.5	2-16,496-482;18-19,480-479;20-24,477-473	1-1,497-497[UP5];17-17,481-481[SIL];x-x,478-478[BULt]	(((((.((.(((((((((((((((.&.))))))))))))))).))-)))))	AGCUCGAGAGCAGUUGGUUUCGCGG&ACGUGAAAUCGACUGCACU-GAGUU	3	99.9134	2	0.252139	Output/S8h/cleaveLand_result/t_plot/PC-3p-113847_67_XM_016081231.2_488_TPlot.pdf	0	0	NA	NA	NA	99.9134	0	Inf	up	1.5881e-23	2.42062e-22	yes	GO:0016740(transferase activity);GO:0016772(transferase activity, transferring phosphorus-containing groups);GO:0003824(catalytic activity);GO:0016779(nucleotidyltransferase activity)	ko03018(RNA degradation)
PC-3p-113847_67	XM_016090400.2	1171	1193	1184	-42.2	-28.1	0.665877	6.5	1-13,1193-1181;15-21,1180-1174	14-14,x-x[BULq];22-24,1173-1171[UP3]	...(((((((-(((((((((((((&))))))))))))).)))))))...	UGAUCGGUGC-GUUGAUUUCAUGU&ACGUGAAAUCGACUGCACUGAGUU	1	33.3045	4	0.842886	Output/S8h/cleaveLand_result/t_plot/PC-3p-113847_67_XM_016090400.2_1184_TPlot.pdf	0	0	NA	NA	NA	33.3045	0	Inf	up	7.8779e-09	1.42259e-08	yes	GO:0043227(membrane-bounded organelle);GO:0009987(cellular process);GO:0043226(organelle);GO:0044238(primary metabolic process);GO:0043436(oxoacid metabolic process);GO:0005623(cell);GO:0008194(UDP-glycosyltransferase activity);GO:0019585(glucuronate metabolic process);GO:0044464(cell part);GO:0006063(uronic acid metabolic process);GO:0052695(cellular glucuronidation);GO:0006082(organic acid meta…	ko01110(Biosynthesis of secondary metabolites)
PC-3p-114045_66	BGI_novel_T008417	1701	1726	1715	-37.3	-25.3	0.678284	10.5	1-5,1726-1722;6-10,1719-1715;12-23,1713-1702	x-x,1721-1720[BULt];11-11,1714-1714[SIL];24-24,1701-1701[UP3]	.((((((((((((.(((((..(((((&)))))--))))).)))))))))))).	UGUUGGAGCUUGUGUUGUUGCGGCAU&AUGCU--AAUAAGACAAGUUCUGACU	1	33.3045	4	0.654813	Output/S8h/cleaveLand_result/t_plot/PC-3p-114045_66_BGI_novel_T008417_1715_TPlot.pdf	0	0	NA	NA	NA	33.3045	0	Inf	up	7.8779e-09	1.42259e-08	yes	NA	ko03010(Ribosome)
PC-3p-114045_66	BGI_novel_T009885	625	650	640	-37.3	-24.9	0.66756	10	2-6,649-645;8-20,642-630;22-22,628-628;23-24,626-625	1-1,650-650[UP5];7-7,644-643[AILt];21-21,629-629[SIL];x-x,627-627[BULt]	((.(.(((((((((((((..(((((.&.)))))-.))))))))))))).)-))	GGCUGAGAGCUUGUCUUGGAUGGCAG&AUGCUA-AUAAGACAAGUUCUGA-CU	2	66.6089	2	0.523302	Output/S8h/cleaveLand_result/t_plot/PC-3p-114045_66_BGI_novel_T009885_640_TPlot.pdf	0	0	NA	NA	NA	66.6089	0	Inf	up	3.3071e-16	2.0359e-15	yes	GO:0008152(metabolic process);GO:1901576(organic substance biosynthetic process);GO:0004315(3-oxoacyl-[acyl-carrier-protein] synthase activity);GO:0006631(fatty acid metabolic process);GO:0044281(small molecule metabolic process);GO:0044237(cellular metabolic process);GO:0016053(organic acid biosynthetic process);GO:0006082(organic acid metabolic process);GO:0016740(transferase activity);GO:00434…	ko01212(Fatty acid metabolism);ko00061(Fatty acid biosynthesis);ko01100(Metabolic pathways)
PC-3p-114045_66	BGI_novel_T011141	132	156	147	-37.3	-25	0.670241	8.5	1-4,156-153;6-8,151-149;10-22,147-135;23-24,133-132	5-5,152-152[SIL];9-9,148-148[SIL];x-x,134-134[BULt]	((.(((((((((((((.(((.((((&)))).))).)))))))))))))-))	GGCUCGGAGCUUGUCUCGUUCGCGU&AUGCUAAUAAGACAAGUUCUGA-CU	1	33.3045	4	0.861713	Output/S8h/cleaveLand_result/t_plot/PC-3p-114045_66_BGI_novel_T011141_147_TPlot.pdf	0	0	NA	NA	NA	33.3045	0	Inf	up	7.8779e-09	1.42259e-08	yes	NA	NA
PC-3p-114045_66	XM_016085999.2	2068	2090	2081	-37.3	-26.7	0.715818	8	1-4,2090-2087;7-11,2084-2080;13-23,2079-2069	5-6,2086-2085[SIL];12-12,x-x[BULq];24-24,2068-2068[UP3]	.(((((((((((-(((((..((((&))))..))))).))))))))))).	UGUCAGGGCUUG-CUUAUCUGCAU&AUGCUAAUAAGACAAGUUCUGACU	0	0	NA	NA	NA	4	121.124	0	0.00402149	Output/S0h/cleaveLand_result/t_plot/PC-3p-114045_66_XM_016085999.2_2081_TPlot.pdf	0	121.124	-Inf	down	3.5765e-28	8.25153e-27	yes	GO:0050789(regulation of biological process);GO:0009987(cellular process);GO:0016310(phosphorylation);GO:0035639(purine ribonucleoside triphosphate binding);GO:0003824(catalytic activity);GO:0006464(cellular protein modification process);GO:0032559(adenyl ribonucleotide binding);GO:0051716(cellular response to stimulus);GO:0097367(carbohydrate derivative binding);GO:0097159(organic cyclic compoun…	ko04016(MAPK signaling pathway - plant)
PC-3p-114614_66	XM_016083347.2	756	779	770	-37.3	-27.6	0.739946	9.5	4-6,776-774;8-24,772-756	1-3,779-777[UP5];7-7,773-773[SIL]	(((((((((((((((((.(((...&...))).)))))))))))))))))	GCUCUCGUGAUGAUGUUGUUAAUA&AUGUAAAGAUAUCAUCACGAGAGU	3	99.9134	2	0.0286358	Output/S8h/cleaveLand_result/t_plot/PC-3p-114614_66_XM_016083347.2_770_TPlot.pdf	1	30.281	4	0.0855575	Output/S0h/cleaveLand_result/t_plot/PC-3p-114614_66_XM_016083347.2_770_TPlot.pdf	99.9134	30.281	1.72227	up	1.0422e-09	4.10813e-09	yes	GO:1901576(organic substance biosynthetic process);GO:0006497(protein lipidation);GO:0009987(cellular process);GO:0042158(lipoprotein biosynthetic process);GO:0009058(biosynthetic process);GO:0044260(cellular macromolecule metabolic process);GO:1901566(organonitrogen compound biosynthetic process);GO:0008152(metabolic process);GO:0043412(macromolecule modification);GO:0034645(cellular macromolecu…	NA
PC-3p-114614_66	XM_021125110.1	1630	1653	1644	-37.3	-25.4	0.680965	16	8-18,1646-1636;20-24,1634-1630	1-7,1653-1647[UP5];19-19,1635-1635[SIL]	(((((.(((((((((((.......&.......))))))))))).)))))	ACUCUGGUGAUGGUGUCACUCAUG&AUGUAAAGAUAUCAUCACGAGAGU	1	33.3045	4	0.412473	Output/S8h/cleaveLand_result/t_plot/PC-3p-114614_66_XM_021125110.1_1644_TPlot.pdf	0	0	NA	NA	NA	33.3045	0	Inf	up	7.8779e-09	1.42259e-08	yes	GO:0097367(carbohydrate derivative binding);GO:0044464(cell part);GO:0050789(regulation of biological process);GO:0051130(positive regulation of cellular component organization);GO:0036094(small molecule binding);GO:0044430(cytoskeletal part);GO:0030029(actin filament-based process);GO:0044089(positive regulation of cellular component biogenesis);GO:0043228(non-membrane-bounded organelle);GO:0033…	NA
PC-3p-114614_66	XM_021132240.1	1803	1827	1817	-37.3	-25.6	0.686327	11.5	2-4,1826-1824;9-24,1818-1803	1-1,1827-1827[UP5];5-8,1823-1819[AILt]	((((((((((((((((.....(((.&.)))-....))))))))))))))))	ACUCUUGUGAUGAUAUGAUGGACAG&AUGU-AAAGAUAUCAUCACGAGAGU	0	0	NA	NA	NA	1	30.281	4	0.331342	Output/S0h/cleaveLand_result/t_plot/PC-3p-114614_66_XM_021132240.1_1817_TPlot.pdf	0	30.281	-Inf	down	3.7368e-08	4.29087e-08	yes	NA	NA
PC-3p-114614_66	XM_021132241.1	1692	1716	1706	-37.3	-25.6	0.686327	11.5	2-4,1715-1713;9-24,1707-1692	1-1,1716-1716[UP5];5-8,1712-1708[AILt]	((((((((((((((((.....(((.&.)))-....))))))))))))))))	ACUCUUGUGAUGAUAUGAUGGACAG&AUGU-AAAGAUAUCAUCACGAGAGU	0	0	NA	NA	NA	1	30.281	4	0.28495	Output/S0h/cleaveLand_result/t_plot/PC-3p-114614_66_XM_021132241.1_1706_TPlot.pdf	0	30.281	-Inf	down	3.7368e-08	4.29087e-08	yes	NA	NA
PC-3p-114792_66	BGI_novel_T002926	2070	2096	2085	-48.5	-32.8	0.676289	8.5	1-5,2096-2092;6-9,2090-2087;11-21,2084-2074;22-24,2072-2070	x-x,2091-2091[BULt];10-10,2086-2085[AILt];x-x,2073-2073[BULt]	(((.(((((((((((..((((.(((((&)))))-))))-.)))))))))))-)))	GGUGGCGGUCGAUUUGGAGGUAGGAGU&ACUUC-ACCU-GAAGUCGACCGC-ACC	2	66.6089	2	0.218826	Output/S8h/cleaveLand_result/t_plot/PC-3p-114792_66_BGI_novel_T002926_2085_TPlot.pdf	0	0	NA	NA	NA	66.6089	0	Inf	up	3.3071e-16	2.0359e-15	yes	GO:1901265(nucleoside phosphate binding);GO:0097159(organic cyclic compound binding);GO:1901363(heterocyclic compound binding);GO:0005488(binding);GO:0000166(nucleotide binding);GO:0036094(small molecule binding);GO:0003676(nucleic acid binding)	NA
PC-3p-114792_66	BGI_novel_T002927	2067	2093	2082	-48.5	-32.8	0.676289	8.5	1-5,2093-2089;6-9,2087-2084;11-21,2081-2071;22-24,2069-2067	x-x,2088-2088[BULt];10-10,2083-2082[AILt];x-x,2070-2070[BULt]	(((.(((((((((((..((((.(((((&)))))-))))-.)))))))))))-)))	GGUGGCGGUCGAUUUGGAGGUAGGAGU&ACUUC-ACCU-GAAGUCGACCGC-ACC	0	0	NA	NA	NA	1	30.281	4	0.572451	Output/S0h/cleaveLand_result/t_plot/PC-3p-114792_66_BGI_novel_T002927_2082_TPlot.pdf	0	30.281	-Inf	down	3.7368e-08	4.29087e-08	yes	GO:1901265(nucleoside phosphate binding);GO:0097159(organic cyclic compound binding);GO:1901363(heterocyclic compound binding);GO:0005488(binding);GO:0000166(nucleotide binding);GO:0036094(small molecule binding);GO:0003676(nucleic acid binding)	NA
PC-3p-114792_66	XM_016085238.2	963	990	980	-48.5	-31.8	0.65567	8.5	1-2,990-989;4-8,987-983;9-18,981-972;19-21,970-968;22-24,965-963	3-3,988-988[SIL];x-x,982-982[BULt];x-x,971-971[BULt];x-x,967-966[BULt]	(((..(((.((((((((((.(((((.((&)).)))))-))))))))))-)))--)))	GGUUCGCGCGUCGGCUUCGUGGUGACGU&ACUUCACC-UGAAGUCGAC-CGC--ACC	1	33.3045	4	0.732583	Output/S8h/cleaveLand_result/t_plot/PC-3p-114792_66_XM_016085238.2_980_TPlot.pdf	0	0	NA	NA	NA	33.3045	0	Inf	up	7.8779e-09	1.42259e-08	yes	NA	NA
PC-3p-114792_66	XM_016089737.2	1607	1637	1622	-48.5	-34.5	0.71134	15	1-7,1637-1631;8-22,1624-1610;23-24,1608-1607	x-x,1630-1625[BULt];x-x,1609-1609[BULt]	((.(((((((((((((((......(((((((&)))))))------)))))))))))))))-))	GGUUGUGGUUGACUUCAGUCAUUUGUGAGGU&ACUUCAC------CUGAAGUCGACCGCA-CC	1	33.3045	4	0.241607	Output/S8h/cleaveLand_result/t_plot/PC-3p-114792_66_XM_016089737.2_1622_TPlot.pdf	1	30.281	4	0.252247	Output/S0h/cleaveLand_result/t_plot/PC-3p-114792_66_XM_016089737.2_1622_TPlot.pdf	33.3045	30.281	0.137303	up	0.70456	0.704918	yes	GO:0009059(macromolecule biosynthetic process);GO:0071704(organic substance metabolic process);GO:0009058(biosynthetic process);GO:0071840(cellular component organization or biogenesis);GO:0044264(cellular polysaccharide metabolic process);GO:0005976(polysaccharide metabolic process);GO:0071555(cell wall organization);GO:0009987(cellular process);GO:0044425(membrane part);GO:0071554(cell wall org…	NA
PC-3p-114792_66	XM_016097167.2	1935	1961	1950	-48.5	-32.8	0.676289	8.5	1-5,1961-1957;6-9,1955-1952;11-21,1949-1939;22-24,1937-1935	x-x,1956-1956[BULt];10-10,1951-1950[AILt];x-x,1938-1938[BULt]	(((.(((((((((((..((((.(((((&)))))-))))-.)))))))))))-)))	GGUGGCGGUCGAUUUGGAGGUAGGAGU&ACUUC-ACCU-GAAGUCGACCGC-ACC	1	33.3045	4	0.535057	Output/S8h/cleaveLand_result/t_plot/PC-3p-114792_66_XM_016097167.2_1950_TPlot.pdf	0	0	NA	NA	NA	33.3045	0	Inf	up	7.8779e-09	1.42259e-08	yes	GO:1901265(nucleoside phosphate binding);GO:0097159(organic cyclic compound binding);GO:1901363(heterocyclic compound binding);GO:0005488(binding);GO:0000166(nucleotide binding);GO:0036094(small molecule binding);GO:0003676(nucleic acid binding)	NA
PC-3p-114792_66	XM_016098550.2	2550	2573	2565	-48.5	-32.5	0.670103	8	2-5,2572-2569;7-15,2568-2560;18-24,2556-2550	1-1,2573-2573[UP5];6-6,x-x[BULq];16-17,2559-2557[AILt]	(((((((...(((((((((-((((.&.)))).)))))))))-..)))))))	GGUGUGGCUAGGCUUCGGG-GAAGC&ACUUCACCUGAAGUC-GACCGCACC	3	99.9134	2	0.262925	Output/S8h/cleaveLand_result/t_plot/PC-3p-114792_66_XM_016098550.2_2565_TPlot.pdf	0	0	NA	NA	NA	99.9134	0	Inf	up	1.5881e-23	2.42062e-22	yes	GO:0048731(system development);GO:0005576(extracellular region);GO:0071704(organic substance metabolic process);GO:0015977(carbon fixation);GO:0006101(citrate metabolic process);GO:0043227(membrane-bounded organelle);GO:0005623(cell);GO:0044281(small molecule metabolic process);GO:0005622(intracellular);GO:0009507(chloroplast);GO:0044464(cell part);GO:0016829(lyase activity);GO:0043231(intracellu…	ko01200(Carbon metabolism);ko01100(Metabolic pathways);ko00710(Carbon fixation in photosynthetic organisms);ko00620(Pyruvate metabolism)
PC-3p-114792_66	XM_021137498.1	2046	2072	2061	-48.5	-32.8	0.676289	8.5	1-5,2072-2068;6-9,2066-2063;11-21,2060-2050;22-24,2048-2046	x-x,2067-2067[BULt];10-10,2062-2061[AILt];x-x,2049-2049[BULt]	(((.(((((((((((..((((.(((((&)))))-))))-.)))))))))))-)))	GGUGGCGGUCGAUUUGGAGGUAGGAGU&ACUUC-ACCU-GAAGUCGACCGC-ACC	1	33.3045	4	0.52506	Output/S8h/cleaveLand_result/t_plot/PC-3p-114792_66_XM_021137498.1_2061_TPlot.pdf	0	0	NA	NA	NA	33.3045	0	Inf	up	7.8779e-09	1.42259e-08	yes	GO:1901265(nucleoside phosphate binding);GO:0097159(organic cyclic compound binding);GO:1901363(heterocyclic compound binding);GO:0005488(binding);GO:0000166(nucleotide binding);GO:0036094(small molecule binding);GO:0003676(nucleic acid binding)	NA
PC-3p-115095_65	BGI_novel_T000698	3287	3311	3301	-39.4	-25.8	0.654822	7	1-9,3311-3303;10-13,3301-3298;15-17,3296-3294;18-21,3292-3289	x-x,3302-3302[BULt];14-14,3297-3297[SIL];x-x,3293-3293[BULt];22-23,3288-3287[UP3]	..((((.(((.((((.(((((((((&)))))))))-)))).)))-))))..	ACCACGUGAUAGGACUCCUCCGAUU&AAUCGGAGG-GUCCAAUU-UGUGUU	1	33.3045	4	0.99935	Output/S8h/cleaveLand_result/t_plot/PC-3p-115095_65_BGI_novel_T000698_3301_TPlot.pdf	0	0	NA	NA	NA	33.3045	0	Inf	up	7.8779e-09	1.42259e-08	yes	NA	NA
PC-3p-115095_65	BGI_novel_T002045	474	501	492	-39.4	-25.68	0.651777	14.5	3-13,499-489;17-20,480-477;22-23,475-474	1-2,501-500[UP5];14-16,488-481[AILt];21-21,476-476[SIL]	((.((((........(((((((((((..&..)))))))))))-----...)))).))	GAGGCAGUGACGACGGGGCCCUCCGAGC&AAUCGGAGGGUCC-----AAUUUGUGUU	2	66.6089	2	0.926821	Output/S8h/cleaveLand_result/t_plot/PC-3p-115095_65_BGI_novel_T002045_492_TPlot.pdf	0	0	NA	NA	NA	66.6089	0	Inf	up	3.3071e-16	2.0359e-15	yes	GO:0055114(oxidation-reduction process);GO:0003824(catalytic activity);GO:0016491(oxidoreductase activity);GO:0008152(metabolic process)	ko00061(Fatty acid biosynthesis);ko00780(Biotin metabolism);ko01040(Biosynthesis of unsaturated fatty acids);ko01212(Fatty acid metabolism);ko01100(Metabolic pathways)
PC-3p-115095_65	XM_016078677.2	1171	1193	1184	-39.4	-31.5	0.799492	5.5	1-4,1193-1190;6-7,1188-1187;9-22,1185-1172	5-5,1189-1189[SIL];8-8,1186-1186[SIL];23-23,1171-1171[UP3]	.((((((((((((((.((.((((&)))).)).)))))))))))))).	UGCACAAAUUGGACCGUCGGAUU&AAUCGGAGGGUCCAAUUUGUGUU	0	0	NA	NA	NA	1	30.281	4	0.0437351	Output/S0h/cleaveLand_result/t_plot/PC-3p-115095_65_XM_016078677.2_1184_TPlot.pdf	0	30.281	-Inf	down	3.7368e-08	4.29087e-08	yes	GO:0016021(integral component of membrane);GO:0016020(membrane);GO:0031224(intrinsic component of membrane);GO:0044425(membrane part)	NA
PC-3p-115095_65	XM_016079456.2	3098	3120	3111	-39.4	-29.3	0.743655	8.5	3-14,3118-3107;17-21,3104-3100	1-2,3120-3119[UP5];15-16,3106-3105[SIL];22-23,3099-3098[UP3]	..(((((..((((((((((((..&..))))))))))))..)))))..	UUCGCAAUCUGGACCCUCUGAAC&AAUCGGAGGGUCCAAUUUGUGUU	0	0	NA	NA	NA	1	30.281	4	0.511065	Output/S0h/cleaveLand_result/t_plot/PC-3p-115095_65_XM_016079456.2_3111_TPlot.pdf	0	30.281	-Inf	down	3.7368e-08	4.29087e-08	yes	NA	ko03015(mRNA surveillance pathway)
PC-3p-115095_65	XM_016086346.2	1533	1555	1546	-39.4	-26.6	0.675127	6.5	2-18,1554-1538;21-23,1535-1533	1-1,1555-1555[UP5];19-20,1537-1536[SIL]	(((..(((((((((((((((((.&.)))))))))))))))))..)))	GACCAAGGUUGGAUCCUUCGAUG&AAUCGGAGGGUCCAAUUUGUGUU	3	99.9134	2	0.656212	Output/S8h/cleaveLand_result/t_plot/PC-3p-115095_65_XM_016086346.2_1546_TPlot.pdf	1	30.281	4	0.962632	Output/S0h/cleaveLand_result/t_plot/PC-3p-115095_65_XM_016086346.2_1546_TPlot.pdf	99.9134	30.281	1.72227	up	1.0422e-09	4.10813e-09	yes	GO:1901576(organic substance biosynthetic process);GO:0016053(organic acid biosynthetic process);GO:0009987(cellular process);GO:0008652(cellular amino acid biosynthetic process);GO:0016614(oxidoreductase activity, acting on CH-OH group of donors);GO:1901607(alpha-amino acid biosynthetic process);GO:0006520(cellular amino acid metabolic process);GO:0009069(serine family amino acid metabolic proce…	ko01230(Biosynthesis of amino acids);ko01100(Metabolic pathways);ko01200(Carbon metabolism);ko00260(Glycine, serine and threonine metabolism)
PC-3p-115095_65	XM_016094144.2	417	444	435	-39.4	-25.68	0.651777	14.5	3-13,442-432;17-20,423-420;22-23,418-417	1-2,444-443[UP5];14-16,431-424[AILt];21-21,419-419[SIL]	((.((((........(((((((((((..&..)))))))))))-----...)))).))	GAGGCAGUGACGACGGGGCCCUCCGAGC&AAUCGGAGGGUCC-----AAUUUGUGUU	0	0	NA	NA	NA	1	30.281	4	0.999688	Output/S0h/cleaveLand_result/t_plot/PC-3p-115095_65_XM_016094144.2_435_TPlot.pdf	0	30.281	-Inf	down	3.7368e-08	4.29087e-08	yes	GO:0055114(oxidation-reduction process);GO:0003824(catalytic activity);GO:0016491(oxidoreductase activity);GO:0008152(metabolic process)	ko00061(Fatty acid biosynthesis);ko00780(Biotin metabolism);ko01040(Biosynthesis of unsaturated fatty acids);ko01212(Fatty acid metabolism);ko01100(Metabolic pathways)
PC-3p-115095_65	XM_016095093.2	457	481	472	-39.4	-25.98	0.659391	11.5	4-13,478-469;16-22,464-458	1-3,481-479[UP5];14-15,468-465[AILt];23-23,457-457[UP3]	.(((((((....((((((((((...&...))))))))))--..))))))).	UACACAAGGGCAGGACCCUCUGUUU&AAUCGGAGGGUCC--AAUUUGUGUU	2	66.6089	3	0.44558	Output/S8h/cleaveLand_result/t_plot/PC-3p-115095_65_XM_016095093.2_472_TPlot.pdf	5	151.405	3	0.469092	Output/S0h/cleaveLand_result/t_plot/PC-3p-115095_65_XM_016095093.2_472_TPlot.pdf	66.6089	151.405	-1.18463	down	9.2879e-09	1.67329e-08	yes	GO:0019222(regulation of metabolic process);GO:0000079(regulation of cyclin-dependent protein serine/threonine kinase activity);GO:0050790(regulation of catalytic activity);GO:0051174(regulation of phosphorus metabolic process);GO:1904029(regulation of cyclin-dependent protein kinase activity);GO:0051171(regulation of nitrogen compound metabolic process);GO:0031399(regulation of protein modificat…	ko01110(Biosynthesis of secondary metabolites);ko00630(Glyoxylate and dicarboxylate metabolism);ko01200(Carbon metabolism);ko01210(2-Oxocarboxylic acid metabolism);ko01100(Metabolic pathways);ko01230(Biosynthesis of amino acids);ko00020(Citrate cycle (TCA cycle))
PC-3p-115095_65	XM_016099628.2	3356	3377	3368	-39.4	-27	0.685279	9.5	4-14,3374-3364;16-18,3363-3361;20-23,3359-3356	1-3,3377-3375[UP5];15-15,x-x[BULq];19-19,3360-3360[SIL]	((((.(((-(((((((((((...&...))))))))))).))).))))	GACAGAGG-UGGACCCUCUGGAG&AAUCGGAGGGUCCAAUUUGUGUU	1	33.3045	4	0.918753	Output/S8h/cleaveLand_result/t_plot/PC-3p-115095_65_XM_016099628.2_3368_TPlot.pdf	0	0	NA	NA	NA	33.3045	0	Inf	up	7.8779e-09	1.42259e-08	yes	GO:0003723(RNA binding);GO:0097159(organic cyclic compound binding);GO:1901363(heterocyclic compound binding);GO:0005488(binding);GO:0003676(nucleic acid binding)	ko03013(RNA transport);ko03015(mRNA surveillance pathway)
PC-3p-115095_65	XM_016106938.2	660	681	672	-39.4	-27.8	0.705584	8	3-19,679-663;21-23,662-660	1-2,681-680[UP5];20-20,x-x[BULq]	(((-(((((((((((((((((..&..))))))))))))))))).)))	GGC-CAAAUUGGACCCUUUGGCU&AAUCGGAGGGUCCAAUUUGUGUU	3	99.9134	2	0.420019	Output/S8h/cleaveLand_result/t_plot/PC-3p-115095_65_XM_016106938.2_672_TPlot.pdf	2	60.562	2	0.43787	Output/S0h/cleaveLand_result/t_plot/PC-3p-115095_65_XM_016106938.2_672_TPlot.pdf	99.9134	60.562	0.722265	up	0.0018931	0.00207573	yes	GO:0044464(cell part);GO:0072350(tricarboxylic acid metabolic process);GO:0045239(tricarboxylic acid cycle enzyme complex);GO:0036094(small molecule binding);GO:0016903(oxidoreductase activity, acting on the aldehyde or oxo group of donors);GO:0015980(energy derivation by oxidation of organic compounds);GO:0005488(binding);GO:0005737(cytoplasm);GO:0044281(small molecule metabolic process);GO:0016…	ko00380(Tryptophan metabolism);ko00310(Lysine degradation);ko01100(Metabolic pathways);ko00020(Citrate cycle (TCA cycle));ko01110(Biosynthesis of secondary metabolites);ko01200(Carbon metabolism)
PC-3p-115095_65	XM_016107163.2	1587	1609	1600	-39.4	-28.5	0.72335	9	3-13,1607-1597;15-20,1595-1590	1-2,1609-1608[UP5];14-14,1596-1596[SIL];21-23,1589-1587[UP3]	...((((((.(((((((((((..&..))))))))))).))))))...	AUGGCGAAUGGGACCCUCCGGGA&AAUCGGAGGGUCCAAUUUGUGUU	2	66.6089	2	0.353258	Output/S8h/cleaveLand_result/t_plot/PC-3p-115095_65_XM_016107163.2_1600_TPlot.pdf	0	0	NA	NA	NA	66.6089	0	Inf	up	3.3071e-16	2.0359e-15	yes	NA	NA
PC-3p-115095_65	XM_016108330.2	1492	1516	1505	-39.4	-26.78	0.679695	14.5	3-5,1514-1512;8-22,1507-1493	1-2,1516-1515[UP5];6-7,1511-1508[AILt];23-23,1492-1492[UP3]	.(((((((((((((((....(((..&..)))--..))))))))))))))).	UGCACAGGUUGGGCCCCUAACGAGG&AAUCG--GAGGGUCCAAUUUGUGUU	2	66.6089	2	0.619413	Output/S8h/cleaveLand_result/t_plot/PC-3p-115095_65_XM_016108330.2_1505_TPlot.pdf	0	0	NA	NA	NA	66.6089	0	Inf	up	3.3071e-16	2.0359e-15	yes	GO:0005975(carbohydrate metabolic process);GO:0016020(membrane);GO:0044425(membrane part);GO:0008152(metabolic process);GO:0016798(hydrolase activity, acting on glycosyl bonds);GO:0016787(hydrolase activity);GO:0016021(integral component of membrane);GO:0004553(hydrolase activity, hydrolyzing O-glycosyl compounds);GO:0044238(primary metabolic process);GO:0031224(intrinsic component of membrane);G…	NA
PC-3p-115095_65	XM_016113039.2	2378	2398	2389	-39.4	-25.7	0.652284	7	1-14,2398-2385;17-19,2383-2381;21-23,2380-2378	15-16,2384-2384[AILq];20-20,x-x[BULq]	(((-(((.-((((((((((((((&))))))))))))))..))).)))	GAC-CAGC-UGGGCCCUCUGGUU&AAUCGGAGGGUCCAAUUUGUGUU	1	33.3045	4	0.999452	Output/S8h/cleaveLand_result/t_plot/PC-3p-115095_65_XM_016113039.2_2389_TPlot.pdf	1	30.281	4	0.999627	Output/S0h/cleaveLand_result/t_plot/PC-3p-115095_65_XM_016113039.2_2389_TPlot.pdf	33.3045	30.281	0.137303	up	0.70456	0.704918	yes	GO:0016788(hydrolase activity, acting on ester bonds);GO:1901363(heterocyclic compound binding);GO:0006725(cellular aromatic compound metabolic process);GO:0046914(transition metal ion binding);GO:0071704(organic substance metabolic process);GO:0005488(binding);GO:0044237(cellular metabolic process);GO:0090305(nucleic acid phosphodiester bond hydrolysis);GO:0006807(nitrogen compound metabolic pro…	ko04016(MAPK signaling pathway - plant)
PC-3p-115095_65	XM_016113537.2	6398	6421	6412	-39.4	-27.2	0.690355	11.5	5-14,6417-6408;17-22,6404-6399	1-4,6421-6418[UP5];15-16,6407-6405[AILt];23-23,6398-6398[UP3]	.((((((...((((((((((....&....))))))))))-..)))))).	UACACAGUACUGGACCCUCCUGUU&AAUCGGAGGGUCCA-AUUUGUGUU	0	0	NA	NA	NA	1	30.281	4	0.906536	Output/S0h/cleaveLand_result/t_plot/PC-3p-115095_65_XM_016113537.2_6412_TPlot.pdf	0	30.281	-Inf	down	3.7368e-08	4.29087e-08	yes	NA	NA
PC-3p-115095_65	XM_021128910.1	3098	3120	3111	-39.4	-29.3	0.743655	8.5	3-14,3118-3107;17-21,3104-3100	1-2,3120-3119[UP5];15-16,3106-3105[SIL];22-23,3099-3098[UP3]	..(((((..((((((((((((..&..))))))))))))..)))))..	UUCGCAAUCUGGACCCUCUGAAC&AAUCGGAGGGUCCAAUUUGUGUU	0	0	NA	NA	NA	1	30.281	4	0.552897	Output/S0h/cleaveLand_result/t_plot/PC-3p-115095_65_XM_021128910.1_3111_TPlot.pdf	0	30.281	-Inf	down	3.7368e-08	4.29087e-08	yes	NA	ko03015(mRNA surveillance pathway)
PC-3p-115095_65	XM_021128912.1	2580	2602	2593	-39.4	-29.3	0.743655	8.5	3-14,2600-2589;17-21,2586-2582	1-2,2602-2601[UP5];15-16,2588-2587[SIL];22-23,2581-2580[UP3]	..(((((..((((((((((((..&..))))))))))))..)))))..	UUCGCAAUCUGGACCCUCUGAAC&AAUCGGAGGGUCCAAUUUGUGUU	0	0	NA	NA	NA	1	30.281	4	0.542787	Output/S0h/cleaveLand_result/t_plot/PC-3p-115095_65_XM_021128912.1_2593_TPlot.pdf	0	30.281	-Inf	down	3.7368e-08	4.29087e-08	yes	NA	ko03015(mRNA surveillance pathway)
PC-3p-115095_65	XM_021136144.1	925	948	939	-39.4	-25.9	0.65736	9	2-7,947-942;9-13,940-936;16-20,932-928;22-23,926-925	1-1,948-948[UP5];8-8,941-941[SIL];14-15,935-933[AILt];21-21,927-927[SIL]	((.(((((...(((((.((((((.&.)))))).)))))-..))))).))	GAGACAGAGCAGGGCCGUCCGAUC&AAUCGGAGGGUCC-AAUUUGUGUU	0	0	NA	NA	NA	1	30.281	4	0.998956	Output/S0h/cleaveLand_result/t_plot/PC-3p-115095_65_XM_021136144.1_939_TPlot.pdf	0	30.281	-Inf	down	3.7368e-08	4.29087e-08	yes	GO:0051603(proteolysis involved in cellular protein catabolic process);GO:0043170(macromolecule metabolic process);GO:1901565(organonitrogen compound catabolic process);GO:0006464(cellular protein modification process);GO:0006807(nitrogen compound metabolic process);GO:0019787(ubiquitin-like protein transferase activity);GO:0044257(cellular protein catabolic process);GO:0000209(protein polyubiqui…	NA
PC-3p-115095_65	XM_021138496.1	3172	3193	3184	-39.4	-27	0.685279	9.5	4-14,3190-3180;16-18,3179-3177;20-23,3175-3172	1-3,3193-3191[UP5];15-15,x-x[BULq];19-19,3176-3176[SIL]	((((.(((-(((((((((((...&...))))))))))).))).))))	GACAGAGG-UGGACCCUCUGGAG&AAUCGGAGGGUCCAAUUUGUGUU	1	33.3045	4	0.913398	Output/S8h/cleaveLand_result/t_plot/PC-3p-115095_65_XM_021138496.1_3184_TPlot.pdf	0	0	NA	NA	NA	33.3045	0	Inf	up	7.8779e-09	1.42259e-08	yes	GO:0003723(RNA binding);GO:0097159(organic cyclic compound binding);GO:1901363(heterocyclic compound binding);GO:0005488(binding);GO:0003676(nucleic acid binding)	ko03013(RNA transport);ko03015(mRNA surveillance pathway)
PC-3p-115095_65	XM_021139246.1	333	354	345	-39.4	-28.8	0.730964	7	1-13,354-342;17-21,339-335	14-16,341-340[AILq];22-23,334-333[UP3]	..(((((..-(((((((((((((&)))))))))))))...)))))..	GCCACGGCG-GGGCCCUCCGAUU&AAUCGGAGGGUCCAAUUUGUGUU	1	33.3045	4	0.669191	Output/S8h/cleaveLand_result/t_plot/PC-3p-115095_65_XM_021139246.1_345_TPlot.pdf	0	0	NA	NA	NA	33.3045	0	Inf	up	7.8779e-09	1.42259e-08	yes	GO:0008270(zinc ion binding);GO:0043167(ion binding);GO:0031224(intrinsic component of membrane);GO:0044425(membrane part);GO:0005488(binding);GO:0046872(metal ion binding);GO:0043169(cation binding);GO:0016021(integral component of membrane);GO:0016020(membrane);GO:0046914(transition metal ion binding)	ko04141(Protein processing in endoplasmic reticulum)
PC-3p-115095_65	XM_021141168.1	212	233	224	-39.4	-28.1	0.713198	9.5	5-19,229-215;21-23,214-212	1-4,233-230[UP5];20-20,x-x[BULq]	(((-(((((((((((((((....&....))))))))))))))).)))	GGC-UAAAUUGGACCCUCCAGUU&AAUCGGAGGGUCCAAUUUGUGUU	2	66.6089	2	0.380838	Output/S8h/cleaveLand_result/t_plot/PC-3p-115095_65_XM_021141168.1_224_TPlot.pdf	0	0	NA	NA	NA	66.6089	0	Inf	up	3.3071e-16	2.0359e-15	yes	GO:0003824(catalytic activity);GO:0016747(transferase activity, transferring acyl groups other than amino-acyl groups);GO:0016746(transferase activity, transferring acyl groups);GO:0016740(transferase activity)	ko00330(Arginine and proline metabolism);ko00944(Flavone and flavonol biosynthesis);ko00943(Isoflavonoid biosynthesis)
PC-3p-115095_65	XM_021142094.1	317	341	331	-39.4	-25.9	0.65736	9.5	3-8,339-334;9-13,332-328;16-19,325-322;20-23,320-317	1-2,341-340[UP5];x-x,333-333[BULt];14-15,327-326[SIL];x-x,321-321[BULt]	((((.((((..(((((.((((((..&..))))))-)))))..))))-))))	GGCGUCAAAGAGGACCUCUCCGAGC&AAUCGGAG-GGUCCAAUUUG-UGUU	1	33.3045	4	0.998744	Output/S8h/cleaveLand_result/t_plot/PC-3p-115095_65_XM_021142094.1_331_TPlot.pdf	0	0	NA	NA	NA	33.3045	0	Inf	up	7.8779e-09	1.42259e-08	yes	NA	NA
PC-3p-116071_65	XM_016102029.2	849	872	863	-37.3	-26.4	0.707775	12.5	6-18,867-855;20-23,853-850	1-5,872-868[UP5];19-19,854-854[SIL];24-24,849-849[UP3]	.((((.(((((((((((((.....&.....))))))))))))).)))).	CGUUUCAGAGGCCAGUGUUGUGUA&AUAAAAAUACUGGCCUCUUAGACU	0	0	NA	NA	NA	1	30.281	4	0.182285	Output/S0h/cleaveLand_result/t_plot/PC-3p-116071_65_XM_016102029.2_863_TPlot.pdf	0	30.281	-Inf	down	3.7368e-08	4.29087e-08	yes	GO:0046903(secretion);GO:0051640(organelle localization);GO:0006904(vesicle docking involved in exocytosis);GO:0051234(establishment of localization);GO:0048278(vesicle docking);GO:0032940(secretion by cell);GO:0006887(exocytosis);GO:0009987(cellular process);GO:0140056(organelle localization by membrane tethering);GO:0016192(vesicle-mediated transport);GO:0051641(cellular localization);GO:002240…	NA
PC-3p-116071_65	XM_016111913.2	507	531	522	-37.3	-24.5	0.656836	8	2-13,530-519;14-22,517-509	1-1,531-531[UP5];x-x,518-518[BULt];23-24,508-507[UP3]	..(((((((((.((((((((((((.&.))))))))))))-)))))))))..	GUUCUGGGGGGAUCAGUGUUUUUGA&AUAAAAAUACUGG-CCUCUUAGACU	2	66.6089	3	0.11706	Output/S8h/cleaveLand_result/t_plot/PC-3p-116071_65_XM_016111913.2_522_TPlot.pdf	0	0	NA	NA	NA	66.6089	0	Inf	up	3.3071e-16	2.0359e-15	yes	GO:0009058(biosynthetic process);GO:0005829(cytosol);GO:0002181(cytoplasmic translation);GO:0071704(organic substance metabolic process);GO:0044391(ribosomal subunit);GO:0044444(cytoplasmic part);GO:0044249(cellular biosynthetic process);GO:0044464(cell part);GO:0043232(intracellular non-membrane-bounded organelle);GO:0043604(amide biosynthetic process);GO:0043043(peptide biosynthetic process);GO…	ko03010(Ribosome)
PC-3p-117208_64	BGI_novel_T007646	2163	2186	2177	-39.9	-26.8	0.671679	13.5	5-18,2182-2169	1-4,2186-2183[UP5];19-24,2168-2163[UP3]	......((((((((((((((....&....))))))))))))))......	AUUAAGGGCCGAGAGUCGUUCAUA&AUUUAACGACUCUCGGCUAUCAAC	0	0	NA	NA	NA	2	60.562	1	0.0472925	Output/S0h/cleaveLand_result/t_plot/PC-3p-117208_64_BGI_novel_T007646_2177_TPlot.pdf	0	60.562	-Inf	down	7.123e-15	2.99612e-14	yes	GO:0016021(integral component of membrane);GO:0044425(membrane part);GO:0031224(intrinsic component of membrane);GO:0016020(membrane)	NA
PC-3p-117208_64	XM_016082953.2	1213	1238	1229	-39.9	-26.1	0.654135	9.5	1-6,1238-1233;9-15,1230-1224;16-24,1221-1213	7-8,1232-1231[SIL];x-x,1223-1222[BULt]	(((((((((..(((((((..((((((&))))))..)))))))--)))))))))	GUUGAUGGCGACGAGGGUGAUUGGAU&AUUUAACGACUCUCG--GCUAUCAAC	1	33.3045	4	0.977329	Output/S8h/cleaveLand_result/t_plot/PC-3p-117208_64_XM_016082953.2_1229_TPlot.pdf	0	0	NA	NA	NA	33.3045	0	Inf	up	7.8779e-09	1.42259e-08	yes	GO:0016070(RNA metabolic process);GO:0032501(multicellular organismal process);GO:0044424(intracellular part);GO:0048229(gametophyte development);GO:0006139(nucleobase-containing compound metabolic process);GO:0010467(gene expression);GO:0034641(cellular nitrogen compound metabolic process);GO:0008152(metabolic process);GO:0006396(RNA processing);GO:1901360(organic cyclic compound metabolic proce…	ko03008(Ribosome biogenesis in eukaryotes)
PC-3p-117208_64	XM_016087891.2	1647	1670	1661	-39.9	-32.9	0.824561	2.5	1-16,1670-1655;18-24,1653-1647	17-17,1654-1654[SIL]	(((((((.((((((((((((((((&)))))))))))))))).)))))))	GUUGAUAUCUGAGAGUCGUUAGAU&AUUUAACGACUCUCGGCUAUCAAC	1	33.3045	4	0.273197	Output/S8h/cleaveLand_result/t_plot/PC-3p-117208_64_XM_016087891.2_1661_TPlot.pdf	4	121.124	2	0.108816	Output/S0h/cleaveLand_result/t_plot/PC-3p-117208_64_XM_016087891.2_1661_TPlot.pdf	33.3045	121.124	-1.8627	down	1.5815e-12	6.50417e-12	yes	GO:0006807(nitrogen compound metabolic process);GO:0006508(proteolysis);GO:0044238(primary metabolic process);GO:0019538(protein metabolic process);GO:0030163(protein catabolic process);GO:1901564(organonitrogen compound metabolic process);GO:0008233(peptidase activity);GO:0003824(catalytic activity);GO:0004175(endopeptidase activity);GO:0070001(aspartic-type peptidase activity);GO:1901565(organo…	ko03010(Ribosome)
PC-3p-117208_64	XM_016100506.2	717	741	732	-39.9	-26.3	0.659148	16	7-14,735-728;15-21,726-720	1-6,741-736[UP5];x-x,727-727[BULt];22-24,719-717[UP3]	...(((((((.((((((((......&......))))))))-)))))))...	UUCGGUGGCCGGAGAGUCGGGACUC&AUUUAACGACUCUC-GGCUAUCAAC	1	33.3045	4	0.940949	Output/S8h/cleaveLand_result/t_plot/PC-3p-117208_64_XM_016100506.2_732_TPlot.pdf	1	30.281	4	0.948896	Output/S0h/cleaveLand_result/t_plot/PC-3p-117208_64_XM_016100506.2_732_TPlot.pdf	33.3045	30.281	0.137303	up	0.70456	0.704918	yes	GO:0016020(membrane);GO:0016021(integral component of membrane);GO:0016740(transferase activity);GO:0032259(methylation);GO:0008168(methyltransferase activity);GO:0044425(membrane part);GO:0008152(metabolic process);GO:0016741(transferase activity, transferring one-carbon groups);GO:0031224(intrinsic component of membrane);GO:0003824(catalytic activity)	NA
PC-3p-117208_64	XM_016102742.2	1314	1337	1328	-39.9	-27.4	0.686717	9.5	1-3,1337-1335;5-19,1333-1319	4-4,1334-1334[SIL];20-24,1318-1314[UP3]	.....(((((((((((((((.(((&))).))))))))))))))).....	CGUCUUGGCCGAGGGUCGUUUGAU&AUUUAACGACUCUCGGCUAUCAAC	6	199.827	2	0.536953	Output/S8h/cleaveLand_result/t_plot/PC-3p-117208_64_XM_016102742.2_1328_TPlot.pdf	10	302.81	2	0.556967	Output/S0h/cleaveLand_result/t_plot/PC-3p-117208_64_XM_016102742.2_1328_TPlot.pdf	199.827	302.81	-0.599663	down	4.3476e-06	4.91808e-06	yes	GO:0004013(adenosylhomocysteinase activity);GO:0034641(cellular nitrogen compound metabolic process);GO:0044281(small molecule metabolic process);GO:0044238(primary metabolic process);GO:0009116(nucleoside metabolic process);GO:0006534(cysteine metabolic process);GO:0071704(organic substance metabolic process);GO:0046128(purine ribonucleoside metabolic process);GO:0019752(carboxylic acid metaboli…	ko00270(Cysteine and methionine metabolism);ko01100(Metabolic pathways)
PC-3p-117208_64	XM_016112794.2	1982	2005	1996	-39.9	-26.8	0.671679	13.5	5-18,2001-1988	1-4,2005-2002[UP5];19-24,1987-1982[UP3]	......((((((((((((((....&....))))))))))))))......	AUUAAGGGCCGAGAGUCGUUCAUA&AUUUAACGACUCUCGGCUAUCAAC	0	0	NA	NA	NA	1	30.281	4	0.925263	Output/S0h/cleaveLand_result/t_plot/PC-3p-117208_64_XM_016112794.2_1996_TPlot.pdf	0	30.281	-Inf	down	3.7368e-08	4.29087e-08	yes	GO:0016021(integral component of membrane);GO:0044425(membrane part);GO:0031224(intrinsic component of membrane);GO:0016020(membrane)	NA
PC-3p-117208_64	XM_021137405.1	412	436	427	-39.9	-26	0.651629	16	8-14,429-423;15-24,421-412	1-7,436-430[UP5];x-x,422-422[BULt]	((((((((((.(((((((.......&.......)))))))-))))))))))	GUUGAUGGCUAGAGGGUCAAUUAGA&AUUUAACGACUCUC-GGCUAUCAAC	0	0	NA	NA	NA	1	30.281	4	0.982529	Output/S0h/cleaveLand_result/t_plot/PC-3p-117208_64_XM_021137405.1_427_TPlot.pdf	0	30.281	-Inf	down	3.7368e-08	4.29087e-08	yes	GO:0005840(ribosome);GO:0030529(intracellular ribonucleoprotein complex);GO:0005622(intracellular);GO:0032991(macromolecular complex);GO:0005737(cytoplasm);GO:1990904(ribonucleoprotein complex);GO:0043232(intracellular non-membrane-bounded organelle);GO:0044424(intracellular part);GO:0043229(intracellular organelle);GO:0005623(cell);GO:0044444(cytoplasmic part);GO:0043226(organelle);GO:0044464(ce…	ko03010(Ribosome)
PC-3p-117669_63	BGI_novel_T013996	602	626	617	-38.4	-26	0.677083	6.5	2-14,625-613;15-22,611-604	1-1,626-626[UP5];x-x,612-612[BULt];23-24,603-602[UP3]	..((((((((.(((((((((((((.&.)))))))))))))-))))))))..	CUUGAAGUUGCACUUCGUAUGAAGC&AUUUCAUAUGAAGU-CGACUUCACC	1	33.3045	4	0.797193	Output/S8h/cleaveLand_result/t_plot/PC-3p-117669_63_BGI_novel_T013996_617_TPlot.pdf	0	0	NA	NA	NA	33.3045	0	Inf	up	7.8779e-09	1.42259e-08	yes	GO:0009987(cellular process)	ko03440(Homologous recombination)
PC-3p-117669_63	XM_016096850.2	532	555	546	-38.4	-27.4	0.713542	9.5	3-10,553-546;13-24,543-532	1-2,555-554[UP5];11-12,545-544[SIL]	((((((((((((..((((((((..&..))))))))..))))))))))))	GGUGGGGUUGACAACAUAUGGAUU&AUUUCAUAUGAAGUCGACUUCACC	1	33.3045	4	0.738212	Output/S8h/cleaveLand_result/t_plot/PC-3p-117669_63_XM_016096850.2_546_TPlot.pdf	1	30.281	4	0.755537	Output/S0h/cleaveLand_result/t_plot/PC-3p-117669_63_XM_016096850.2_546_TPlot.pdf	33.3045	30.281	0.137303	up	0.70456	0.704918	yes	GO:0008152(metabolic process);GO:0043414(macromolecule methylation);GO:1990259(histone-glutamine methyltransferase activity);GO:0034470(ncRNA processing);GO:0043628(ncRNA 3'-end processing);GO:0018364(peptidyl-glutamine methylation);GO:0031167(rRNA methylation);GO:0042054(histone methyltransferase activity);GO:0031974(membrane-enclosed lumen);GO:0019538(protein metabolic process);GO:0043144(snoRN…	ko03008(Ribosome biogenesis in eukaryotes)
PC-3p-117669_63	XM_021143533.1	525	548	539	-38.4	-27.7	0.721354	9.5	3-10,546-539;13-24,536-525	1-2,548-547[UP5];11-12,538-537[SIL]	((((((((((((..((((((((..&..))))))))..))))))))))))	GGUGGGGUUGACAACAUAUGGAUU&AUUUCAUAUGAAGUCGACUUCACC	1	33.3045	4	0.689644	Output/S8h/cleaveLand_result/t_plot/PC-3p-117669_63_XM_021143533.1_539_TPlot.pdf	0	0	NA	NA	NA	33.3045	0	Inf	up	7.8779e-09	1.42259e-08	yes	GO:0008033(tRNA processing);GO:0016072(rRNA metabolic process);GO:0000154(rRNA modification);GO:0031167(rRNA methylation);GO:1990259(histone-glutamine methyltransferase activity);GO:0044446(intracellular organelle part);GO:0031428(box C/D snoRNP complex);GO:0005634(nucleus);GO:0044085(cellular component biogenesis);GO:0006807(nitrogen compound metabolic process);GO:0016740(transferase activity);G…	ko03008(Ribosome biogenesis in eukaryotes)
PC-3p-118336_63	XM_016111193.2	12249	12274	12265	-43	-31.7	0.737209	9.5	4-19,12271-12256;20-24,12253-12249	1-3,12274-12272[UP5];x-x,12255-12254[BULt]	(((((..((((((((((((((((...&...))))))))))))))))--)))))	GCUCAGUGGUGCAGUUGAUUUGACAU&AAAUCAAGUCGACUGCACC--UGAGU	1	33.3045	4	0.332485	Output/S8h/cleaveLand_result/t_plot/PC-3p-118336_63_XM_016111193.2_12265_TPlot.pdf	5	151.405	2	0.135778	Output/S0h/cleaveLand_result/t_plot/PC-3p-118336_63_XM_016111193.2_12265_TPlot.pdf	33.3045	151.405	-2.18463	down	3.6195e-18	3.90141e-17	yes	GO:0022618(ribonucleoprotein complex assembly);GO:0005524(ATP binding);GO:0005488(binding);GO:0022607(cellular component assembly);GO:0032559(adenyl ribonucleotide binding);GO:0016887(ATPase activity);GO:0005634(nucleus);GO:0032553(ribonucleotide binding);GO:0035639(purine ribonucleoside triphosphate binding);GO:0044085(cellular component biogenesis);GO:0036094(small molecule binding);GO:0071826(…	ko03008(Ribosome biogenesis in eukaryotes)
PC-3p-118336_63	XM_016113770.2	1641	1664	1654	-43	-29.2	0.67907	5.5	1-6,1664-1659;7-18,1657-1646;20-24,1645-1641	x-x,1658-1658[BULt];19-19,x-x[BULq]	(((((-((((((((((((.((((((&))))))-)))))))))))).)))))	GCUCA-GUGCAGUUGAUUCUGAUUU&AAAUCA-AGUCGACUGCACCUGAGU	0	0	NA	NA	NA	1	30.281	4	0.581905	Output/S0h/cleaveLand_result/t_plot/PC-3p-118336_63_XM_016113770.2_1654_TPlot.pdf	0	30.281	-Inf	down	3.7368e-08	4.29087e-08	yes	GO:0070011(peptidase activity, acting on L-amino acid peptides);GO:0008233(peptidase activity);GO:1901564(organonitrogen compound metabolic process);GO:0044238(primary metabolic process);GO:0019538(protein metabolic process);GO:0003824(catalytic activity);GO:0006807(nitrogen compound metabolic process);GO:0016021(integral component of membrane);GO:0016787(hydrolase activity);GO:0004180(carboxypep…	NA
PC-3p-119396_62	XM_016077837.2	472	495	485	-37.9	-27	0.712401	7	2-8,494-488;10-18,485-477;20-24,476-472	1-1,495-495[UP5];9-9,487-486[AILt];19-19,x-x[BULq]	(((((-(((((((((..(((((((.&.)))))))-.))))))))).)))))	AUUGG-UCAGUUUGGAGUCGGGUUC&AAAUCCGA-ACCAAACUGAACCAAU	2	66.6089	3	0.0858874	Output/S8h/cleaveLand_result/t_plot/PC-3p-119396_62_XM_016077837.2_485_TPlot.pdf	3	90.843	3	0.0918986	Output/S0h/cleaveLand_result/t_plot/PC-3p-119396_62_XM_016077837.2_485_TPlot.pdf	66.6089	90.843	-0.44766	down	0.053435	0.0570321	yes	GO:0036094(small molecule binding);GO:0005515(protein binding);GO:0005488(binding);GO:0006457(protein folding);GO:0032553(ribonucleotide binding);GO:0043168(anion binding);GO:0032559(adenyl ribonucleotide binding);GO:0006950(response to stress);GO:0043167(ion binding);GO:0000166(nucleotide binding);GO:0009987(cellular process);GO:0017076(purine nucleotide binding);GO:0097159(organic cyclic compou…	ko04141(Protein processing in endoplasmic reticulum);ko04626(Plant-pathogen interaction)
PC-3p-119396_62	XM_016079227.2	247	271	262	-37.9	-25	0.659631	10.5	4-6,268-266;8-16,264-256;18-23,253-248	1-3,271-269[UP5];7-7,265-265[SIL];17-17,255-254[AILt];24-24,247-247[UP3]	.((((((..(((((((((.(((...&...))).)))))))))-.)))))).	UUUGGUUGUGGUUUGGUUGGGAGAA&AAAUCCGAACCAAACU-GAACCAAU	1	33.3045	4	0.966036	Output/S8h/cleaveLand_result/t_plot/PC-3p-119396_62_XM_016079227.2_262_TPlot.pdf	1	30.281	4	0.971426	Output/S0h/cleaveLand_result/t_plot/PC-3p-119396_62_XM_016079227.2_262_TPlot.pdf	33.3045	30.281	0.137303	up	0.70456	0.704918	yes	GO:0005623(cell);GO:0065007(biological regulation);GO:0050789(regulation of biological process);GO:0009987(cellular process);GO:0065008(regulation of biological quality);GO:0050794(regulation of cellular process);GO:0042592(homeostatic process);GO:0019725(cellular homeostasis);GO:0045454(cell redox homeostasis)	NA
PC-3p-119396_62	XM_016091316.2	419	453	444	-37.9	-27.3	0.720317	27.5	3-12,451-442;13-23,430-420	1-2,453-452[UP5];x-x,441-431[BULt];24-24,419-419[UP3]	.(((((((((((...........((((((((((..&..))))))))))-----------))))))))))).	UUUGGUUCGGUUUGGGAGCGAGGUGGUUCGGGUGG&AAAUCCGAACCA-----------AACUGAACCAAU	1	33.3045	4	0.581972	Output/S8h/cleaveLand_result/t_plot/PC-3p-119396_62_XM_016091316.2_444_TPlot.pdf	0	0	NA	NA	NA	33.3045	0	Inf	up	7.8779e-09	1.42259e-08	yes	GO:0036094(small molecule binding);GO:0000166(nucleotide binding);GO:1901363(heterocyclic compound binding);GO:0004499(N,N-dimethylaniline monooxygenase activity);GO:0050660(flavin adenine dinucleotide binding);GO:0050661(NADP binding);GO:0043168(anion binding);GO:0003824(catalytic activity);GO:0004497(monooxygenase activity);GO:0016705(oxidoreductase activity, acting on paired donors, with incor…	NA
PC-3p-119396_62	XM_016107953.2	999	1024	1015	-37.9	-26.9	0.709763	7.5	1-3,1024-1022;5-13,1020-1012;14-21,1009-1002	4-4,1021-1021[SIL];x-x,1011-1010[BULt];22-24,1001-999[UP3]	...((((((((..(((((((((.(((&))).)))))))))--))))))))...	GUAGGUUCGGUAAUUGGUUCGGUUUU&AAAUCCGAACCAA--ACUGAACCAAU	0	0	NA	NA	NA	1	30.281	4	0.67307	Output/S0h/cleaveLand_result/t_plot/PC-3p-119396_62_XM_016107953.2_1015_TPlot.pdf	0	30.281	-Inf	down	3.7368e-08	4.29087e-08	yes	GO:0031224(intrinsic component of membrane);GO:0016020(membrane);GO:0044425(membrane part);GO:0016021(integral component of membrane)	NA
PC-3p-119396_62	XM_016110937.2	1096	1120	1111	-37.9	-25.1	0.662269	10.5	3-12,1118-1109;13-17,1107-1103;19-21,1101-1099	1-2,1120-1119[UP5];x-x,1108-1108[BULt];18-18,1102-1102[SIL];22-24,1098-1096[UP3]	...(((.(((((.((((((((((..&..))))))))))-))))).)))...	AUAGGUCCGGUUCUGGUUCGGGUCG&AAAUCCGAACCA-AACUGAACCAAU	5	166.522	2	0.643497	Output/S8h/cleaveLand_result/t_plot/PC-3p-119396_62_XM_016110937.2_1111_TPlot.pdf	0	0	NA	NA	NA	166.522	0	Inf	up	4.2241e-38	2.031e-36	yes	GO:0005488(binding);GO:0046872(metal ion binding);GO:0043167(ion binding);GO:0043169(cation binding)	NA
PC-3p-120365_61	XM_016105009.2	1028	1050	1041	-34.5	-22.7	0.657971	11.5	5-10,1046-1041;12-22,1040-1030	1-4,1050-1047[UP5];11-11,x-x[BULq];23-24,1029-1028[UP3]	..(((((((((((-((((((....&....)))))).)))))))))))..	AUUGUGUUGAUUC-CAGUUCUUCC&AAAUGAACUGAGAAUUAACACACA	0	0	NA	NA	NA	1	30.281	4	0.542787	Output/S0h/cleaveLand_result/t_plot/PC-3p-120365_61_XM_016105009.2_1041_TPlot.pdf	0	30.281	-Inf	down	3.7368e-08	4.29087e-08	yes	GO:0044267(cellular protein metabolic process);GO:1901564(organonitrogen compound metabolic process);GO:2000112(regulation of cellular macromolecule biosynthetic process);GO:0019538(protein metabolic process);GO:0050896(response to stimulus);GO:0043412(macromolecule modification);GO:0035556(intracellular signal transduction);GO:0016310(phosphorylation);GO:0044444(cytoplasmic part);GO:0003824(cata…	ko04075(Plant hormone signal transduction);ko04016(MAPK signaling pathway - plant)
PC-3p-120365_61	XM_021131032.1	1345	1368	1359	-34.5	-25.7	0.744928	9	5-14,1364-1355;16-24,1353-1345	1-4,1368-1365[UP5];15-15,1354-1354[SIL]	(((((((((.((((((((((....&....)))))))))).)))))))))	UGUGUGUUAUUUUUCAGUUCCUCU&AAAUGAACUGAGAAUUAACACACA	0	0	NA	NA	NA	1	30.281	4	0.125551	Output/S0h/cleaveLand_result/t_plot/PC-3p-120365_61_XM_021131032.1_1359_TPlot.pdf	0	30.281	-Inf	down	3.7368e-08	4.29087e-08	yes	GO:0006725(cellular aromatic compound metabolic process);GO:0016788(hydrolase activity, acting on ester bonds);GO:0006807(nitrogen compound metabolic process);GO:0046483(heterocycle metabolic process);GO:0090305(nucleic acid phosphodiester bond hydrolysis);GO:0008152(metabolic process);GO:0003824(catalytic activity);GO:0016787(hydrolase activity);GO:0009987(cellular process);GO:0044237(cellular m…	ko03018(RNA degradation)
PC-3p-121413_60	BGI_novel_T001060	679	698	689	-32.3	-24.8	0.767802	3.5	1-19,698-680	20-20,679-679[UP3]	.(((((((((((((((((((&))))))))))))))))))).	CAGUUUUCUUUGUGUGAAAA&UUUUCACACGGAGAAGACUA	0	0	NA	NA	NA	1	30.281	4	0.300761	Output/S0h/cleaveLand_result/t_plot/PC-3p-121413_60_BGI_novel_T001060_689_TPlot.pdf	0	30.281	-Inf	down	3.7368e-08	4.29087e-08	yes	GO:0006952(defense response);GO:0006950(response to stress);GO:0050896(response to stimulus);GO:0009607(response to biotic stimulus)	NA
PC-3p-121413_60	BGI_novel_T001063	596	615	606	-32.3	-24.8	0.767802	3.5	1-19,615-597	20-20,596-596[UP3]	.(((((((((((((((((((&))))))))))))))))))).	CAGUUUUCUUUGUGUGAAAA&UUUUCACACGGAGAAGACUA	1	33.3045	4	0.318133	Output/S8h/cleaveLand_result/t_plot/PC-3p-121413_60_BGI_novel_T001063_606_TPlot.pdf	0	0	NA	NA	NA	33.3045	0	Inf	up	7.8779e-09	1.42259e-08	yes	GO:0050896(response to stimulus);GO:0009607(response to biotic stimulus);GO:0006952(defense response);GO:0006950(response to stress)	NA
PC-3p-121413_60	BGI_novel_T001065	596	615	606	-32.3	-24.8	0.767802	3.5	1-19,615-597	20-20,596-596[UP3]	.(((((((((((((((((((&))))))))))))))))))).	CAGUUUUCUUUGUGUGAAAA&UUUUCACACGGAGAAGACUA	1	33.3045	4	0.303472	Output/S8h/cleaveLand_result/t_plot/PC-3p-121413_60_BGI_novel_T001065_606_TPlot.pdf	1	30.281	4	0.316222	Output/S0h/cleaveLand_result/t_plot/PC-3p-121413_60_BGI_novel_T001065_606_TPlot.pdf	33.3045	30.281	0.137303	up	0.70456	0.704918	yes	GO:0050896(response to stimulus);GO:0009607(response to biotic stimulus);GO:0006952(defense response);GO:0006950(response to stress)	NA
PC-3p-121413_60	BGI_novel_T001067	603	622	613	-32.3	-24.8	0.767802	3.5	1-19,622-604	20-20,603-603[UP3]	.(((((((((((((((((((&))))))))))))))))))).	CAGUUUUCUUUGUGUGAAAA&UUUUCACACGGAGAAGACUA	0	0	NA	NA	NA	1	30.281	4	0.28495	Output/S0h/cleaveLand_result/t_plot/PC-3p-121413_60_BGI_novel_T001067_613_TPlot.pdf	0	30.281	-Inf	down	3.7368e-08	4.29087e-08	yes	GO:0050896(response to stimulus);GO:0009607(response to biotic stimulus);GO:0006952(defense response);GO:0006950(response to stress)	NA
PC-3p-121413_60	BGI_novel_T002717	573	592	583	-32.3	-22.1	0.684211	5.5	1-11,592-582;13-14,580-579;16-20,577-573	12-12,581-581[SIL];15-15,578-578[SIL]	(((((.((.(((((((((((&))))))))))).)).)))))	UGGUCAUCGCUGUGUGGAAA&UUUUCACACGGAGAAGACUA	2	66.6089	2	0.810494	Output/S8h/cleaveLand_result/t_plot/PC-3p-121413_60_BGI_novel_T002717_583_TPlot.pdf	0	0	NA	NA	NA	66.6089	0	Inf	up	3.3071e-16	2.0359e-15	yes	GO:0071704(organic substance metabolic process);GO:0000166(nucleotide binding);GO:0097159(organic cyclic compound binding);GO:0005622(intracellular);GO:0043231(intracellular membrane-bounded organelle);GO:0090304(nucleic acid metabolic process);GO:0030554(adenyl nucleotide binding);GO:0046483(heterocycle metabolic process);GO:0005524(ATP binding);GO:0006260(DNA replication);GO:0017076(purine nucl…	ko03410(Base excision repair);ko03420(Nucleotide excision repair);ko03030(DNA replication);ko03430(Mismatch repair)
PC-3p-121413_60	BGI_novel_T003224	381	400	391	-32.3	-21.9	0.678019	4.5	1-9,400-392;11-15,390-386;17-20,384-381	10-10,391-391[SIL];16-16,385-385[SIL]	((((.(((((.(((((((((&))))))))).))))).))))	UAGUGUUUUUGGUGUGAAAA&UUUUCACACGGAGAAGACUA	1	33.3045	4	0.995953	Output/S8h/cleaveLand_result/t_plot/PC-3p-121413_60_BGI_novel_T003224_391_TPlot.pdf	0	0	NA	NA	NA	33.3045	0	Inf	up	7.8779e-09	1.42259e-08	yes	GO:0097159(organic cyclic compound binding);GO:0000373(Group II intron splicing);GO:0003723(RNA binding);GO:0044238(primary metabolic process);GO:0043170(macromolecule metabolic process);GO:0000375(RNA splicing, via transesterification reactions);GO:0010467(gene expression);GO:0016070(RNA metabolic process);GO:1901360(organic cyclic compound metabolic process);GO:0090304(nucleic acid metabolic pr…	ko03018(RNA degradation)
PC-3p-121413_60	BGI_novel_T005078	2197	2216	2207	-32.3	-21.8	0.674923	8.5	2-6,2215-2211;9-19,2208-2198	1-1,2216-2216[UP5];7-8,2210-2209[SIL];20-20,2197-2197[UP3]	.(((((((((((..(((((.&.)))))..))))))))))).	AAGUUUUCUCCGGAUGGGAC&UUUUCACACGGAGAAGACUA	1	33.3045	4	0.998037	Output/S8h/cleaveLand_result/t_plot/PC-3p-121413_60_BGI_novel_T005078_2207_TPlot.pdf	0	0	NA	NA	NA	33.3045	0	Inf	up	7.8779e-09	1.42259e-08	yes	GO:0005488(binding);GO:0007010(cytoskeleton organization);GO:0003676(nucleic acid binding);GO:0005622(intracellular);GO:2000112(regulation of cellular macromolecule biosynthetic process);GO:0009725(response to hormone);GO:0006996(organelle organization);GO:0065007(biological regulation);GO:0031326(regulation of cellular biosynthetic process);GO:0010033(response to organic substance);GO:0009719(re…	NA
PC-3p-121413_60	BGI_novel_T005212	1318	1341	1332	-32.3	-21	0.650155	11.5	1-8,1341-1334;10-11,1332-1331;12-20,1326-1318	9-9,1333-1333[SIL];x-x,1330-1327[BULt]	(((((((((....((.((((((((&)))))))).))----)))))))))	UGGUCUUCUUGCACCUUGUGAAGA&UUUUCACACGG----AGAAGACUA	1	33.3045	4	0.999987	Output/S8h/cleaveLand_result/t_plot/PC-3p-121413_60_BGI_novel_T005212_1332_TPlot.pdf	0	0	NA	NA	NA	33.3045	0	Inf	up	7.8779e-09	1.42259e-08	yes	NA	ko01110(Biosynthesis of secondary metabolites);ko00860(Porphyrin and chlorophyll metabolism);ko00190(Oxidative phosphorylation);ko01100(Metabolic pathways)
PC-3p-121413_60	XM_016076477.2	184	204	195	-32.3	-21.9	0.678019	8	2-12,203-193;13-15,191-189;17-18,187-186	1-1,204-204[UP5];x-x,192-192[BULt];16-16,188-188[SIL];19-20,185-184[UP3]	..((.(((.(((((((((((.&.)))))))))))-))).))..	UUGUGUUCUUCCGUGUGGAGC&UUUUCACACGGA-GAAGACUA	1	33.3045	4	0.994994	Output/S8h/cleaveLand_result/t_plot/PC-3p-121413_60_XM_016076477.2_195_TPlot.pdf	0	0	NA	NA	NA	33.3045	0	Inf	up	7.8779e-09	1.42259e-08	yes	NA	NA
PC-3p-121413_60	XM_016080540.2	642	661	652	-32.3	-24.2	0.749226	5.5	2-8,660-654;10-20,652-642	1-1,661-661[UP5];9-9,653-653[SIL]	(((((((((((.(((((((.&.))))))).)))))))))))	UGGUCUUCUCUUUGUGGAAC&UUUUCACACGGAGAAGACUA	1	33.3045	4	0.493761	Output/S8h/cleaveLand_result/t_plot/PC-3p-121413_60_XM_016080540.2_652_TPlot.pdf	0	0	NA	NA	NA	33.3045	0	Inf	up	7.8779e-09	1.42259e-08	yes	GO:0016747(transferase activity, transferring acyl groups other than amino-acyl groups);GO:0016746(transferase activity, transferring acyl groups);GO:0003824(catalytic activity);GO:0016740(transferase activity)	ko00943(Isoflavonoid biosynthesis);ko00944(Flavone and flavonol biosynthesis);ko00330(Arginine and proline metabolism)
PC-3p-121413_60	XM_016081466.2	1219	1238	1229	-32.3	-22.3	0.690402	5	2-10,1237-1229;12-20,1227-1219	1-1,1238-1238[UP5];11-11,1228-1228[SIL]	(((((((((.(((((((((.&.))))))))).)))))))))	UGGUUUUCUACGUGUGGAAC&UUUUCACACGGAGAAGACUA	1	33.3045	4	0.982806	Output/S8h/cleaveLand_result/t_plot/PC-3p-121413_60_XM_016081466.2_1229_TPlot.pdf	3	90.843	2	0.769369	Output/S0h/cleaveLand_result/t_plot/PC-3p-121413_60_XM_016081466.2_1229_TPlot.pdf	33.3045	90.843	-1.44766	down	2.4146e-07	2.74105e-07	yes	GO:0004659(prenyltransferase activity);GO:0043227(membrane-bounded organelle);GO:0009507(chloroplast);GO:0005737(cytoplasm);GO:0043229(intracellular organelle);GO:0003824(catalytic activity);GO:0005623(cell);GO:0044424(intracellular part);GO:0044444(cytoplasmic part);GO:0016765(transferase activity, transferring alkyl or aryl (other than methyl) groups);GO:0009536(plastid);GO:0005622(intracellula…	ko01110(Biosynthesis of secondary metabolites);ko00130(Ubiquinone and other terpenoid-quinone biosynthesis);ko01100(Metabolic pathways)
PC-3p-121413_60	XM_016086460.1	1149	1170	1159	-32.3	-22	0.681115	8	2-6,1169-1165;7-8,1163-1162;9-19,1160-1150	1-1,1170-1170[UP5];x-x,1164-1164[BULt];x-x,1161-1161[BULt];20-20,1149-1149[UP3]	.(((((((((((.((.(((((.&.)))))-))-))))))))))).	GGGUUUUCUCCGAUGAUGAGAG&UUUUCA-CA-CGGAGAAGACUA	6	199.827	2	0.832507	Output/S8h/cleaveLand_result/t_plot/PC-3p-121413_60_XM_016086460.1_1159_TPlot.pdf	3	90.843	2	0.848831	Output/S0h/cleaveLand_result/t_plot/PC-3p-121413_60_XM_016086460.1_1159_TPlot.pdf	199.827	90.843	1.1373	up	1.6284e-10	6.61729e-10	yes	NA	NA
PC-3p-121413_60	XM_016087307.2	583	605	593	-32.3	-21.6	0.668731	9	2-6,604-600;7-9,598-596;10-18,593-585	1-1,605-605[UP5];x-x,599-599[BULt];x-x,595-594[BULt];19-20,584-583[UP3]	..(((((((((..(((.(((((.&.)))))-)))--)))))))))..	GUGUCUUCUCCAGGUGUUGAAAG&UUUUCA-CAC--GGAGAAGACUA	1	33.3045	4	0.999403	Output/S8h/cleaveLand_result/t_plot/PC-3p-121413_60_XM_016087307.2_593_TPlot.pdf	0	0	NA	NA	NA	33.3045	0	Inf	up	7.8779e-09	1.42259e-08	yes	NA	NA
PC-3p-121413_60	XM_016091424.2	512	530	522	-32.3	-22.3	0.690402	6	2-5,529-526;7-17,525-515	1-1,530-530[UP5];6-6,x-x[BULq];18-20,514-512[UP3]	...(((((((((((-((((.&.)))).)))))))))))...	UACUCUUCUCCGUG-GAAAC&UUUUCACACGGAGAAGACUA	0	0	NA	NA	NA	1	30.281	4	0.987783	Output/S0h/cleaveLand_result/t_plot/PC-3p-121413_60_XM_016091424.2_522_TPlot.pdf	0	30.281	-Inf	down	3.7368e-08	4.29087e-08	yes	GO:0009987(cellular process);GO:0006807(nitrogen compound metabolic process);GO:0005488(binding);GO:0005623(cell);GO:0043412(macromolecule modification);GO:0044464(cell part);GO:0005737(cytoplasm);GO:0019538(protein metabolic process);GO:0005622(intracellular);GO:0044260(cellular macromolecule metabolic process);GO:0006464(cellular protein modification process);GO:0043170(macromolecule metabolic …	NA
PC-3p-121413_60	XM_016096280.2	572	591	582	-32.3	-22.1	0.684211	5.5	1-11,591-581;13-14,579-578;16-20,576-572	12-12,580-580[SIL];15-15,577-577[SIL]	(((((.((.(((((((((((&))))))))))).)).)))))	UGGUCAUCGCUGUGUGGAAA&UUUUCACACGGAGAAGACUA	1	33.3045	4	0.992813	Output/S8h/cleaveLand_result/t_plot/PC-3p-121413_60_XM_016096280.2_582_TPlot.pdf	0	0	NA	NA	NA	33.3045	0	Inf	up	7.8779e-09	1.42259e-08	yes	GO:0043167(ion binding);GO:0046872(metal ion binding);GO:0043169(cation binding);GO:0005488(binding);GO:1902456(regulation of stomatal opening);GO:0050789(regulation of biological process);GO:0046914(transition metal ion binding);GO:0010119(regulation of stomatal movement);GO:0065007(biological regulation);GO:0050794(regulation of cellular process);GO:0008270(zinc ion binding)	ko04120(Ubiquitin mediated proteolysis)
PC-3p-121413_60	XM_016096782.2	659	678	669	-32.3	-22.3	0.690402	8	3-7,676-672;9-17,670-662	1-2,678-677[UP5];8-8,671-671[SIL];18-20,661-659[UP3]	...(((((((((.(((((..&..))))).)))))))))...	UGUUCUUCUCCGCGUGAACU&UUUUCACACGGAGAAGACUA	0	0	NA	NA	NA	1	30.281	4	0.987507	Output/S0h/cleaveLand_result/t_plot/PC-3p-121413_60_XM_016096782.2_669_TPlot.pdf	0	30.281	-Inf	down	3.7368e-08	4.29087e-08	yes	NA	NA
PC-3p-121413_60	XM_016097602.2	799	819	809	-32.3	-21.6	0.668731	9	2-6,818-814;7-9,812-810;11-18,808-801	1-1,819-819[UP5];x-x,813-813[BULt];10-10,809-809[SIL];19-20,800-799[UP3]	..((((((((.(((.(((((.&.)))))-))).))))))))..	GCGUCUUCUCGGUGCUGAGGU&UUUUCA-CACGGAGAAGACUA	1	33.3045	4	0.999337	Output/S8h/cleaveLand_result/t_plot/PC-3p-121413_60_XM_016097602.2_809_TPlot.pdf	1	30.281	4	0.999543	Output/S0h/cleaveLand_result/t_plot/PC-3p-121413_60_XM_016097602.2_809_TPlot.pdf	33.3045	30.281	0.137303	up	0.70456	0.704918	yes	GO:0044283(small molecule biosynthetic process);GO:0009308(amine metabolic process);GO:0046219(indolalkylamine biosynthetic process);GO:0046483(heterocycle metabolic process);GO:0016835(carbon-oxygen lyase activity);GO:0006568(tryptophan metabolic process);GO:0006725(cellular aromatic compound metabolic process);GO:0071704(organic substance metabolic process);GO:0046394(carboxylic acid biosynthet…	ko01100(Metabolic pathways);ko00260(Glycine, serine and threonine metabolism);ko01230(Biosynthesis of amino acids);ko01110(Biosynthesis of secondary metabolites);ko00400(Phenylalanine, tyrosine and tryptophan biosynthesis)
PC-3p-121413_60	XM_016100109.2	673	693	684	-32.3	-21.3	0.659443	5.5	1-7,693-687;9-16,685-678;17-20,676-673	8-8,686-686[SIL];x-x,677-677[BULt]	((((.((((((((.(((((((&))))))).))))))))-))))	UAGUACUUCUUCGAGUGAGAG&UUUUCACACGGAGAAG-ACUA	1	33.3045	4	0.999896	Output/S8h/cleaveLand_result/t_plot/PC-3p-121413_60_XM_016100109.2_684_TPlot.pdf	0	0	NA	NA	NA	33.3045	0	Inf	up	7.8779e-09	1.42259e-08	yes	GO:0016818(hydrolase activity, acting on acid anhydrides, in phosphorus-containing anhydrides);GO:0043170(macromolecule metabolic process);GO:1901363(heterocyclic compound binding);GO:0044464(cell part);GO:0004386(helicase activity);GO:1901360(organic cyclic compound metabolic process);GO:0006807(nitrogen compound metabolic process);GO:0005622(intracellular);GO:0032555(purine ribonucleotide bindi…	NA
PC-3p-121413_60	XM_016101719.2	2431	2450	2441	-32.3	-24.5	0.758514	4.5	1-8,2450-2443;10-20,2441-2431	9-9,2442-2442[SIL]	(((((((((((.((((((((&)))))))).)))))))))))	UGGUUUUCUCCUUGUGAGAG&UUUUCACACGGAGAAGACUA	1	33.3045	4	0.448798	Output/S8h/cleaveLand_result/t_plot/PC-3p-121413_60_XM_016101719.2_2441_TPlot.pdf	2	60.562	2	0.193498	Output/S0h/cleaveLand_result/t_plot/PC-3p-121413_60_XM_016101719.2_2441_TPlot.pdf	33.3045	60.562	-0.862697	down	0.0049011	0.0052713	yes	GO:0003825(alpha,alpha-trehalose-phosphate synthase (UDP-forming) activity);GO:0016791(phosphatase activity);GO:0005984(disaccharide metabolic process);GO:0005975(carbohydrate metabolic process);GO:0034637(cellular carbohydrate biosynthetic process);GO:0016051(carbohydrate biosynthetic process);GO:0006796(phosphate-containing compound metabolic process);GO:0004805(trehalose-phosphatase activity);…	ko01100(Metabolic pathways);ko00500(Starch and sucrose metabolism)
PC-3p-121413_60	XM_016102109.2	1709	1733	1719	-32.3	-21.6	0.668731	17	3-9,1731-1725;10-18,1719-1711	1-2,1733-1732[UP5];x-x,1724-1720[BULt];19-20,1710-1709[UP3]	..(((((((((.....(((((((..&..)))))))-----)))))))))..	UUGUCUUCUCCACGGAGUGUGGGUU&UUUUCACAC-----GGAGAAGACUA	0	0	NA	NA	NA	1	30.281	4	0.999573	Output/S0h/cleaveLand_result/t_plot/PC-3p-121413_60_XM_016102109.2_1719_TPlot.pdf	0	30.281	-Inf	down	3.7368e-08	4.29087e-08	yes	GO:0016020(membrane)	NA
PC-3p-121413_60	XM_016103125.2	552	572	562	-32.3	-21.1	0.653251	11	4-7,569-566;9-20,563-552	1-3,572-570[UP5];8-8,565-564[AILt]	((((((((((((..((((...&...))))-.))))))))))))	UGGUUUUCUCCGCCGUGGCCU&UUUUCAC-ACGGAGAAGACUA	1	33.3045	4	0.999953	Output/S8h/cleaveLand_result/t_plot/PC-3p-121413_60_XM_016103125.2_562_TPlot.pdf	0	0	NA	NA	NA	33.3045	0	Inf	up	7.8779e-09	1.42259e-08	yes	GO:0016020(membrane);GO:0016021(integral component of membrane);GO:0044425(membrane part);GO:0031224(intrinsic component of membrane)	NA
PC-3p-121413_60	XM_016103668.2	559	578	569	-32.3	-21.5	0.665635	8	1-13,578-566	14-20,565-559[UP3]	.......(((((((((((((&))))))))))))).......	CAUGUGGCUCCGUGUGAGAA&UUUUCACACGGAGAAGACUA	2	66.6089	1	0.148343	Output/S8h/cleaveLand_result/t_plot/PC-3p-121413_60_XM_016103668.2_569_TPlot.pdf	0	0	NA	NA	NA	66.6089	0	Inf	up	3.3071e-16	2.0359e-15	yes	GO:0016757(transferase activity, transferring glycosyl groups);GO:0003824(catalytic activity);GO:0016740(transferase activity)	NA
PC-3p-121413_60	XM_016103675.2	711	730	721	-32.3	-21.5	0.665635	8	1-13,730-718	14-20,717-711[UP3]	.......(((((((((((((&))))))))))))).......	CAUGUGGCUCCGUGUGAGAA&UUUUCACACGGAGAAGACUA	0	0	NA	NA	NA	1	30.281	4	0.999809	Output/S0h/cleaveLand_result/t_plot/PC-3p-121413_60_XM_016103675.2_721_TPlot.pdf	0	30.281	-Inf	down	3.7368e-08	4.29087e-08	yes	GO:0016757(transferase activity, transferring glycosyl groups);GO:0003824(catalytic activity);GO:0016740(transferase activity)	NA
PC-3p-121413_60	XM_016104760.2	454	473	464	-32.3	-21.1	0.653251	7.5	1-10,473-464;12-17,462-457	11-11,463-463[SIL];18-20,456-454[UP3]	...((((((.((((((((((&)))))))))).))))))...	AUAUCUUCUGUGUGUGAAGG&UUUUCACACGGAGAAGACUA	0	0	NA	NA	NA	1	30.281	4	0.999973	Output/S0h/cleaveLand_result/t_plot/PC-3p-121413_60_XM_016104760.2_464_TPlot.pdf	0	30.281	-Inf	down	3.7368e-08	4.29087e-08	yes	GO:0016829(lyase activity);GO:0003824(catalytic activity);GO:0004609(phosphatidylserine decarboxylase activity);GO:0016831(carboxy-lyase activity);GO:0016830(carbon-carbon lyase activity)	ko04144(Endocytosis)
PC-3p-121413_60	XM_016106971.2	416	436	427	-32.3	-22.4	0.693498	9	4-14,433-423;15-19,421-417	1-3,436-434[UP5];x-x,422-422[BULt];20-20,416-416[UP3]	.(((((.(((((((((((...&...)))))))))))-))))).	CGGUCUAUUUCCGUGUGGCAA&UUUUCACACGGAGA-AGACUA	1	33.3045	4	0.977806	Output/S8h/cleaveLand_result/t_plot/PC-3p-121413_60_XM_016106971.2_427_TPlot.pdf	0	0	NA	NA	NA	33.3045	0	Inf	up	7.8779e-09	1.42259e-08	yes	NA	ko04626(Plant-pathogen interaction)
PC-3p-121413_60	XM_016113896.2	560	579	569	-32.3	-21.1	0.653251	7.5	1-7,579-573;9-16,570-563;18-19,562-561	8-8,572-571[AILt];17-17,x-x[BULq];20-20,560-560[UP3]	.((-((((((((..(((((((&)))))))-.)))))))).)).	CAG-CUUCUCCGGCGUGGAAG&UUUUCAC-ACGGAGAAGACUA	1	33.3045	4	0.999966	Output/S8h/cleaveLand_result/t_plot/PC-3p-121413_60_XM_016113896.2_569_TPlot.pdf	0	0	NA	NA	NA	33.3045	0	Inf	up	7.8779e-09	1.42259e-08	yes	NA	NA
PC-3p-121413_60	XM_016114480.2	287	305	297	-32.3	-21.7	0.671827	5	1-8,305-298;10-20,297-287	9-9,x-x[BULq]	(((((((((((-((((((((&)))))))).)))))))))))	UGGUUUUCUUC-UGUGAAGA&UUUUCACACGGAGAAGACUA	0	0	NA	NA	NA	1	30.281	4	0.999466	Output/S0h/cleaveLand_result/t_plot/PC-3p-121413_60_XM_016114480.2_297_TPlot.pdf	0	30.281	-Inf	down	3.7368e-08	4.29087e-08	yes	NA	ko03015(mRNA surveillance pathway)
PC-3p-121413_60	XM_016114481.2	287	305	297	-32.3	-21.7	0.671827	5	1-8,305-298;10-20,297-287	9-9,x-x[BULq]	(((((((((((-((((((((&)))))))).)))))))))))	UGGUUUUCUUC-UGUGAAGA&UUUUCACACGGAGAAGACUA	0	0	NA	NA	NA	1	30.281	4	0.999202	Output/S0h/cleaveLand_result/t_plot/PC-3p-121413_60_XM_016114481.2_297_TPlot.pdf	0	30.281	-Inf	down	3.7368e-08	4.29087e-08	yes	NA	ko03015(mRNA surveillance pathway)
PC-3p-121413_60	XM_016117021.2	1060	1080	1071	-32.3	-23.8	0.736842	7.5	2-12,1079-1069;14-19,1066-1061	1-1,1080-1080[UP5];13-13,1068-1067[AILt];20-20,1060-1060[UP3]	.((((((..(((((((((((.&.)))))))))))-.)))))).	GGGUCUUGAUCCGUGUGGAGU&UUUUCACACGGA-GAAGACUA	2	66.6089	2	0.334192	Output/S8h/cleaveLand_result/t_plot/PC-3p-121413_60_XM_016117021.2_1071_TPlot.pdf	0	0	NA	NA	NA	66.6089	0	Inf	up	3.3071e-16	2.0359e-15	yes	GO:0031224(intrinsic component of membrane);GO:0044425(membrane part);GO:0016021(integral component of membrane);GO:0016020(membrane)	NA
PC-3p-121413_60	XM_021124575.1	74	92	84	-32.3	-21.7	0.671827	5	1-8,92-85;10-20,84-74	9-9,x-x[BULq]	(((((((((((-((((((((&)))))))).)))))))))))	UGGUUUUCUUC-UGUGAAGA&UUUUCACACGGAGAAGACUA	0	0	NA	NA	NA	1	30.281	4	0.999219	Output/S0h/cleaveLand_result/t_plot/PC-3p-121413_60_XM_021124575.1_84_TPlot.pdf	0	30.281	-Inf	down	3.7368e-08	4.29087e-08	yes	NA	ko03015(mRNA surveillance pathway)
PC-3p-121413_60	XM_021125706.1	3673	3696	3683	-32.3	-21.78	0.674303	13.5	2-8,3695-3689;10-19,3683-3674	1-1,3696-3696[UP5];9-9,3688-3684[AILt];20-20,3673-3673[UP3]	.((((((((((.....(((((((.&.)))))))----.)))))))))).	GGGUCUUCUCCACCUAUGUGGAAU&UUUUCACA----CGGAGAAGACUA	1	33.3045	4	0.998379	Output/S8h/cleaveLand_result/t_plot/PC-3p-121413_60_XM_021125706.1_3683_TPlot.pdf	0	0	NA	NA	NA	33.3045	0	Inf	up	7.8779e-09	1.42259e-08	yes	GO:0018130(heterocycle biosynthetic process);GO:0016817(hydrolase activity, acting on acid anhydrides);GO:0044464(cell part);GO:0043227(membrane-bounded organelle);GO:0043226(organelle);GO:0032991(macromolecular complex);GO:0033554(cellular response to stress);GO:0097367(carbohydrate derivative binding);GO:0044260(cellular macromolecule metabolic process);GO:0071840(cellular component organizatio…	NA
PC-3p-121413_60	XM_021130041.1	1212	1232	1222	-32.3	-21.6	0.668731	6.5	1-6,1232-1227;7-15,1225-1217;17-19,1215-1213	x-x,1226-1226[BULt];16-16,1216-1216[SIL];20-20,1212-1212[UP3]	.(((.(((((((((.((((((&))))))-))))))))).))).	GGGUGUUUUCCGUGCUGGAAG&UUUUCA-CACGGAGAAGACUA	1	33.3045	4	0.999262	Output/S8h/cleaveLand_result/t_plot/PC-3p-121413_60_XM_021130041.1_1222_TPlot.pdf	0	0	NA	NA	NA	33.3045	0	Inf	up	7.8779e-09	1.42259e-08	yes	GO:0046914(transition metal ion binding);GO:0030054(cell junction);GO:0005623(cell);GO:0016491(oxidoreductase activity);GO:0071944(cell periphery);GO:0043169(cation binding);GO:0009505(plant-type cell wall);GO:0003824(catalytic activity);GO:0030312(external encapsulating structure);GO:0005488(binding);GO:0055114(oxidation-reduction process);GO:0008152(metabolic process);GO:0016722(oxidoreductase …	NA
PC-3p-121413_60	XM_021137201.1	540	559	550	-32.3	-22.1	0.684211	5.5	1-11,559-549;13-14,547-546;16-20,544-540	12-12,548-548[SIL];15-15,545-545[SIL]	(((((.((.(((((((((((&))))))))))).)).)))))	UGGUCAUCGCUGUGUGGAAA&UUUUCACACGGAGAAGACUA	1	33.3045	4	0.991834	Output/S8h/cleaveLand_result/t_plot/PC-3p-121413_60_XM_021137201.1_550_TPlot.pdf	0	0	NA	NA	NA	33.3045	0	Inf	up	7.8779e-09	1.42259e-08	yes	GO:0043167(ion binding);GO:0046872(metal ion binding);GO:0043169(cation binding);GO:0005488(binding);GO:1902456(regulation of stomatal opening);GO:0050789(regulation of biological process);GO:0046914(transition metal ion binding);GO:0010119(regulation of stomatal movement);GO:0065007(biological regulation);GO:0050794(regulation of cellular process);GO:0008270(zinc ion binding)	ko04120(Ubiquitin mediated proteolysis)
PC-3p-121413_60	XM_021140264.1	873	896	887	-32.3	-21	0.650155	11.5	1-8,896-889;10-11,887-886;12-20,881-873	9-9,888-888[SIL];x-x,885-882[BULt]	(((((((((....((.((((((((&)))))))).))----)))))))))	UGGUCUUCUUGCACCUUGUGAAGA&UUUUCACACGG----AGAAGACUA	1	33.3045	4	0.999981	Output/S8h/cleaveLand_result/t_plot/PC-3p-121413_60_XM_021140264.1_887_TPlot.pdf	0	0	NA	NA	NA	33.3045	0	Inf	up	7.8779e-09	1.42259e-08	yes	NA	ko01110(Biosynthesis of secondary metabolites);ko00860(Porphyrin and chlorophyll metabolism);ko00190(Oxidative phosphorylation);ko01100(Metabolic pathways)
PC-3p-121413_60	XM_021143411.1	1910	1929	1920	-32.3	-21.8	0.674923	8.5	4-14,1926-1916;16-19,1914-1911	1-3,1929-1927[UP5];15-15,1915-1915[SIL];20-20,1910-1910[UP3]	.((((.(((((((((((...&...))))))))))).)))).	GAGUUGUCUCUGUGUGACCU&UUUUCACACGGAGAAGACUA	0	0	NA	NA	NA	1	30.281	4	0.997612	Output/S0h/cleaveLand_result/t_plot/PC-3p-121413_60_XM_021143411.1_1920_TPlot.pdf	0	30.281	-Inf	down	3.7368e-08	4.29087e-08	yes	NA	NA
PC-3p-122043_60	BGI_novel_T006488	2089	2113	2103	-37.3	-27.4	0.734584	7.5	2-9,2112-2105;10-14,2103-2099;16-24,2097-2089	1-1,2113-2113[UP5];x-x,2104-2104[BULt];15-15,2098-2098[SIL]	(((((((((.(((((.((((((((.&.))))))))-))))).)))))))))	GUGUGUGUAGGUUUCAAGUUCCUGC&AUAGGAACU-GGAACGUACAUAUAU	2	66.6089	2	0.0632803	Output/S8h/cleaveLand_result/t_plot/PC-3p-122043_60_BGI_novel_T006488_2103_TPlot.pdf	0	0	NA	NA	NA	66.6089	0	Inf	up	3.3071e-16	2.0359e-15	yes	NA	NA
PC-3p-122043_60	XM_016117321.2	351	374	365	-37.3	-24.3	0.651475	11	5-15,370-360;17-23,358-352	1-4,374-371[UP5];16-16,359-359[SIL];24-24,351-351[UP3]	.(((((((.(((((((((((....&....))))))))))).))))))).	UUAUGUGUUUGUUCCGGUUCAAGA&AUAGGAACUGGAACGUACAUAUAU	0	0	NA	NA	NA	2	60.562	2	0.369233	Output/S0h/cleaveLand_result/t_plot/PC-3p-122043_60_XM_016117321.2_365_TPlot.pdf	0	60.562	-Inf	down	7.123e-15	2.99612e-14	yes	GO:0003824(catalytic activity)	ko00052(Galactose metabolism)
PC-3p-122043_60	XM_021126385.1	182	205	196	-37.3	-26.3	0.705094	8	2-15,204-191;18-20,188-186	1-1,205-205[UP5];16-17,190-189[SIL];21-24,185-182[UP3]	....(((..((((((((((((((.&.))))))))))))))..)))....	UGUGGUGGUUGUUCCAGUUCCUAC&AUAGGAACUGGAACGUACAUAUAU	0	0	NA	NA	NA	1	30.281	4	0.511065	Output/S0h/cleaveLand_result/t_plot/PC-3p-122043_60_XM_021126385.1_196_TPlot.pdf	0	30.281	-Inf	down	3.7368e-08	4.29087e-08	yes	NA	NA
PC-3p-122043_60	XM_021127206.1	1841	1870	1856	-37.3	-25.5	0.683646	14.5	2-8,1869-1863;9-14,1857-1852;15-22,1850-1843	1-1,1870-1870[UP5];x-x,1862-1858[BULt];x-x,1851-1851[BULt];23-24,1842-1841[UP3]	..((((((((.((((((.....(((((((.&.)))))))-----))))))-))))))))..	GAGUAUGUACAGUUCCAAACAUGUUCCUAG&AUAGGAAC-----UGGAAC-GUACAUAUAU	1	33.3045	4	0.590771	Output/S8h/cleaveLand_result/t_plot/PC-3p-122043_60_XM_021127206.1_1856_TPlot.pdf	0	0	NA	NA	NA	33.3045	0	Inf	up	7.8779e-09	1.42259e-08	yes	GO:0044464(cell part);GO:0043226(organelle);GO:0043227(membrane-bounded organelle);GO:0044424(intracellular part);GO:0005623(cell);GO:0003676(nucleic acid binding);GO:0005634(nucleus);GO:0005622(intracellular);GO:0043229(intracellular organelle);GO:1901363(heterocyclic compound binding);GO:0043231(intracellular membrane-bounded organelle);GO:0003677(DNA binding);GO:0097159(organic cyclic compound…	NA
PC-3p-122748_59	XM_016084744.2	2141	2164	2155	-43.4	-28.8	0.663594	8.5	4-13,2161-2152;15-17,2149-2147;19-24,2146-2141	1-3,2164-2162[UP5];14-14,2151-2150[AILt];18-18,x-x[BULq]	((((((-(((..((((((((((...&...))))))))))-.))).))))))	AGAGAC-CAGCAUGCAGUGGACAUC&AAAGUCCACUGCA-CCUGAGUUUCU	1	33.3045	4	0.973688	Output/S8h/cleaveLand_result/t_plot/PC-3p-122748_59_XM_016084744.2_2155_TPlot.pdf	0	0	NA	NA	NA	33.3045	0	Inf	up	7.8779e-09	1.42259e-08	yes	GO:0043167(ion binding);GO:0046914(transition metal ion binding);GO:0005488(binding);GO:0043169(cation binding);GO:0046872(metal ion binding);GO:0008270(zinc ion binding)	NA
PC-3p-122748_59	XM_016084748.2	2350	2373	2364	-43.4	-28.8	0.663594	8.5	4-13,2370-2361;15-17,2358-2356;19-24,2355-2350	1-3,2373-2371[UP5];14-14,2360-2359[AILt];18-18,x-x[BULq]	((((((-(((..((((((((((...&...))))))))))-.))).))))))	AGAGAC-CAGCAUGCAGUGGACAUC&AAAGUCCACUGCA-CCUGAGUUUCU	0	0	NA	NA	NA	1	30.281	4	0.980462	Output/S0h/cleaveLand_result/t_plot/PC-3p-122748_59_XM_016084748.2_2364_TPlot.pdf	0	30.281	-Inf	down	3.7368e-08	4.29087e-08	yes	GO:0043169(cation binding);GO:0005488(binding);GO:0046914(transition metal ion binding);GO:0046872(metal ion binding);GO:0008270(zinc ion binding);GO:0043167(ion binding)	NA
PC-3p-122748_59	XM_016084749.2	2359	2382	2373	-43.4	-28.8	0.663594	8.5	4-13,2379-2370;15-17,2367-2365;19-24,2364-2359	1-3,2382-2380[UP5];14-14,2369-2368[AILt];18-18,x-x[BULq]	((((((-(((..((((((((((...&...))))))))))-.))).))))))	AGAGAC-CAGCAUGCAGUGGACAUC&AAAGUCCACUGCA-CCUGAGUUUCU	0	0	NA	NA	NA	1	30.281	4	0.981316	Output/S0h/cleaveLand_result/t_plot/PC-3p-122748_59_XM_016084749.2_2373_TPlot.pdf	0	30.281	-Inf	down	3.7368e-08	4.29087e-08	yes	GO:0043169(cation binding);GO:0005488(binding);GO:0046914(transition metal ion binding);GO:0046872(metal ion binding);GO:0008270(zinc ion binding);GO:0043167(ion binding)	NA
PC-3p-122748_59	XM_016085420.2	287	311	302	-43.4	-28.42	0.654839	10	3-11,309-301;15-24,296-287	1-2,311-310[UP5];12-14,300-297[AILt]	((((((((((....(((((((((..&..)))))))))-...))))))))))	GGGAACUCAGUACUCAGUGGACUCU&AAAGUCCACUG-CACCUGAGUUUCU	3	99.9134	2	0.780864	Output/S8h/cleaveLand_result/t_plot/PC-3p-122748_59_XM_016085420.2_302_TPlot.pdf	0	0	NA	NA	NA	99.9134	0	Inf	up	1.5881e-23	2.42062e-22	yes	GO:0016791(phosphatase activity);GO:0006793(phosphorus metabolic process);GO:0042578(phosphoric ester hydrolase activity);GO:0009987(cellular process);GO:0006796(phosphate-containing compound metabolic process);GO:0016311(dephosphorylation);GO:0003993(acid phosphatase activity);GO:0016787(hydrolase activity);GO:0008152(metabolic process);GO:0016788(hydrolase activity, acting on ester bonds);GO:00…	ko03010(Ribosome);ko04016(MAPK signaling pathway - plant)
PC-3p-122748_59	XM_016085708.2	1565	1591	1580	-43.4	-29	0.668203	11.5	3-3,1589-1589;5-8,1587-1584;9-13,1581-1577;14-23,1575-1566	1-2,1591-1590[UP5];4-4,1588-1588[SIL];x-x,1583-1582[BULt];x-x,1576-1576[BULt];24-24,1565-1565[UP3]	.((((((((((.(((((..((((.(..&..).))))--)))))-)))))))))).	UGAAGCUCAGGAUGCAGCAUGGAGUCC&AAAGUCCA--CUGCA-CCUGAGUUUCU	0	0	NA	NA	NA	1	30.281	4	0.975566	Output/S0h/cleaveLand_result/t_plot/PC-3p-122748_59_XM_016085708.2_1580_TPlot.pdf	0	30.281	-Inf	down	3.7368e-08	4.29087e-08	yes	GO:0044260(cellular macromolecule metabolic process);GO:0006468(protein phosphorylation);GO:0051716(cellular response to stimulus);GO:0006796(phosphate-containing compound metabolic process);GO:0006464(cellular protein modification process);GO:0016310(phosphorylation);GO:0007154(cell communication);GO:0035639(purine ribonucleoside triphosphate binding);GO:0016772(transferase activity, transferrin…	NA
PC-3p-122748_59	XM_016090370.2	476	498	489	-43.4	-31.32	0.721659	5.5	2-15,497-484;20-24,480-476	1-1,498-498[UP5];16-19,483-481[AILq]	(((((...-((((((((((((((.&.))))))))))))))....)))))	AGAGAAAU-GGUGCAGUGGACUUA&AAAGUCCACUGCACCUGAGUUUCU	3	99.9134	2	0.284032	Output/S8h/cleaveLand_result/t_plot/PC-3p-122748_59_XM_016090370.2_489_TPlot.pdf	1	30.281	4	0.642481	Output/S0h/cleaveLand_result/t_plot/PC-3p-122748_59_XM_016090370.2_489_TPlot.pdf	99.9134	30.281	1.72227	up	1.0422e-09	4.10813e-09	yes	GO:1905368(peptidase complex);GO:0005623(cell);GO:0000502(proteasome complex);GO:0005622(intracellular);GO:0044464(cell part);GO:0043234(protein complex);GO:1902494(catalytic complex);GO:1905369(endopeptidase complex);GO:0044424(intracellular part);GO:0032991(macromolecular complex)	ko03050(Proteasome)
PC-3p-122748_59	XM_016103066.2	1237	1270	1261	-43.4	-30.4	0.700461	19	2-10,1269-1261;11-15,1253-1249;16-24,1245-1237	1-1,1270-1270[UP5];x-x,1260-1254[BULt];x-x,1248-1246[BULt]	(((((((((...(((((.......(((((((((.&.)))))))))-------)))))---)))))))))	GGGAACUCAAAUGGUGCUGUAAAUAGUGGACUUG&AAAGUCCACU-------GCACC---UGAGUUUCU	1	33.3045	4	0.867473	Output/S8h/cleaveLand_result/t_plot/PC-3p-122748_59_XM_016103066.2_1261_TPlot.pdf	0	0	NA	NA	NA	33.3045	0	Inf	up	7.8779e-09	1.42259e-08	yes	GO:1901564(organonitrogen compound metabolic process);GO:0044260(cellular macromolecule metabolic process);GO:0043170(macromolecule metabolic process);GO:0044238(primary metabolic process);GO:0003824(catalytic activity);GO:0071840(cellular component organization or biogenesis);GO:0019538(protein metabolic process);GO:0006355(regulation of transcription, DNA-templated);GO:0043231(intracellular mem…	NA
PC-3p-122748_59	XM_016112989.2	811	834	825	-43.4	-30.6	0.705069	11	4-7,831-828;9-15,826-820;17-24,818-811	1-3,834-832[UP5];8-8,827-827[SIL];16-16,819-819[SIL]	((((((((.(((((((.((((...&...)))).))))))).))))))))	AGAGGCUCCGGUGCGGAGGGCAGG&AAAGUCCACUGCACCUGAGUUUCU	0	0	NA	NA	NA	2	60.562	2	0.491285	Output/S0h/cleaveLand_result/t_plot/PC-3p-122748_59_XM_016112989.2_825_TPlot.pdf	0	60.562	-Inf	down	7.123e-15	2.99612e-14	yes	GO:0016020(membrane)	NA
PC-3p-122748_59	XM_021131017.1	1561	1587	1576	-43.4	-29	0.668203	11.5	3-3,1585-1585;5-8,1583-1580;9-13,1577-1573;14-23,1571-1562	1-2,1587-1586[UP5];4-4,1584-1584[SIL];x-x,1579-1578[BULt];x-x,1572-1572[BULt];24-24,1561-1561[UP3]	.((((((((((.(((((..((((.(..&..).))))--)))))-)))))))))).	UGAAGCUCAGGAUGCAGCAUGGAGUCC&AAAGUCCA--CUGCA-CCUGAGUUUCU	0	0	NA	NA	NA	1	30.281	4	0.97078	Output/S0h/cleaveLand_result/t_plot/PC-3p-122748_59_XM_021131017.1_1576_TPlot.pdf	0	30.281	-Inf	down	3.7368e-08	4.29087e-08	yes	GO:0044260(cellular macromolecule metabolic process);GO:0006468(protein phosphorylation);GO:0051716(cellular response to stimulus);GO:0006796(phosphate-containing compound metabolic process);GO:0006464(cellular protein modification process);GO:0016310(phosphorylation);GO:0007154(cell communication);GO:0035639(purine ribonucleoside triphosphate binding);GO:0016772(transferase activity, transferrin…	NA
PC-3p-122855_59	BGI_novel_T007684	1696	1719	1710	-35.8	-23.5	0.656425	16.5	8-22,1712-1698	1-7,1719-1713[UP5];23-24,1697-1696[UP3]	..(((((((((((((((.......&.......)))))))))))))))..	ACCAGGUUGUAUGGUCCUUGAGGC&AUAAAACGGACCAUACGAUUUGUA	1	33.3045	4	0.72096	Output/S8h/cleaveLand_result/t_plot/PC-3p-122855_59_BGI_novel_T007684_1710_TPlot.pdf	0	0	NA	NA	NA	33.3045	0	Inf	up	7.8779e-09	1.42259e-08	yes	GO:0044237(cellular metabolic process);GO:0005623(cell);GO:0019219(regulation of nucleobase-containing compound metabolic process);GO:0043226(organelle);GO:0009719(response to endogenous stimulus);GO:0010556(regulation of macromolecule biosynthetic process);GO:0005634(nucleus);GO:0090304(nucleic acid metabolic process);GO:0043231(intracellular membrane-bounded organelle);GO:0050896(response to st…	ko04075(Plant hormone signal transduction)
PC-3p-122855_59	XM_016112870.2	1751	1774	1765	-35.8	-23.5	0.656425	16.5	8-22,1767-1753	1-7,1774-1768[UP5];23-24,1752-1751[UP3]	..(((((((((((((((.......&.......)))))))))))))))..	ACCAGGUUGUAUGGUCCUUGAGGC&AUAAAACGGACCAUACGAUUUGUA	2	66.6089	1	0.0269702	Output/S8h/cleaveLand_result/t_plot/PC-3p-122855_59_XM_016112870.2_1765_TPlot.pdf	0	0	NA	NA	NA	66.6089	0	Inf	up	3.3071e-16	2.0359e-15	yes	GO:0044237(cellular metabolic process);GO:0005623(cell);GO:0019219(regulation of nucleobase-containing compound metabolic process);GO:0043226(organelle);GO:0009719(response to endogenous stimulus);GO:0010556(regulation of macromolecule biosynthetic process);GO:0005634(nucleus);GO:0090304(nucleic acid metabolic process);GO:0043231(intracellular membrane-bounded organelle);GO:0050896(response to st…	ko04075(Plant hormone signal transduction)
PC-3p-122855_59	XM_021126165.1	1764	1787	1778	-35.8	-23.5	0.656425	16.5	8-22,1780-1766	1-7,1787-1781[UP5];23-24,1765-1764[UP3]	..(((((((((((((((.......&.......)))))))))))))))..	ACCAGGUUGUAUGGUCCUUGAGGC&AUAAAACGGACCAUACGAUUUGUA	1	33.3045	4	0.726834	Output/S8h/cleaveLand_result/t_plot/PC-3p-122855_59_XM_021126165.1_1778_TPlot.pdf	0	0	NA	NA	NA	33.3045	0	Inf	up	7.8779e-09	1.42259e-08	yes	GO:0044237(cellular metabolic process);GO:0005623(cell);GO:0019219(regulation of nucleobase-containing compound metabolic process);GO:0043226(organelle);GO:0009719(response to endogenous stimulus);GO:0010556(regulation of macromolecule biosynthetic process);GO:0005634(nucleus);GO:0090304(nucleic acid metabolic process);GO:0043231(intracellular membrane-bounded organelle);GO:0050896(response to st…	ko04075(Plant hormone signal transduction)
PC-3p-122855_59	XM_021139917.1	666	689	680	-35.8	-25.1	0.701117	5.5	1-21,689-669	22-24,668-666[UP3]	...(((((((((((((((((((((&)))))))))))))))))))))...	AGAAAAUUGUAUGGUUUGUUUUAU&AUAAAACGGACCAUACGAUUUGUA	1	33.3045	4	0.332485	Output/S8h/cleaveLand_result/t_plot/PC-3p-122855_59_XM_021139917.1_680_TPlot.pdf	0	0	NA	NA	NA	33.3045	0	Inf	up	7.8779e-09	1.42259e-08	yes	NA	NA
PC-3p-12333_982	BGI_novel_T000740	3529	3553	3543	-42.7	-28.3	0.662763	9.5	3-4,3551-3550;5-12,3548-3541;14-16,3539-3537;18-24,3535-3529	1-2,3553-3552[UP5];x-x,3549-3549[BULt];13-13,3540-3540[SIL];17-17,3536-3536[SIL]	(((((((.(((.((((((((.((..&..))-)))))))).))).)))))))	UCAGCAAGUGAGGAAGCCCAUGCUA&UUGU-UGGGCUUUAUCAGUUGCUGG	1	33.3045	4	0.99994	Output/S8h/cleaveLand_result/t_plot/PC-3p-12333_982_BGI_novel_T000740_3543_TPlot.pdf	0	0	NA	NA	NA	33.3045	0	Inf	up	7.8779e-09	1.42259e-08	yes	NA	ko04933(AGE-RAGE signaling pathway in diabetic complications)
PC-3p-12333_982	BGI_novel_T008368	494	517	508	-42.7	-28.3	0.662763	9	1-11,517-507;13-22,505-496	12-12,506-506[SIL];23-24,495-494[UP3]	..((((((((((.(((((((((((&))))))))))).))))))))))..	GAGGCAGCUGAUUGAGCUCAAUGA&UUGUUGGGCUUUAUCAGUUGCUGG	0	0	NA	NA	NA	2	60.562	2	0.968205	Output/S0h/cleaveLand_result/t_plot/PC-3p-12333_982_BGI_novel_T008368_508_TPlot.pdf	0	60.562	-Inf	down	7.123e-15	2.99612e-14	yes	GO:0034504(protein localization to nucleus);GO:0005215(transporter activity);GO:0033046(negative regulation of sister chromatid segregation);GO:0051170(nuclear import);GO:0051169(nuclear transport);GO:0071705(nitrogen compound transport);GO:0006886(intracellular protein transport);GO:0006810(transport);GO:0045786(negative regulation of cell cycle);GO:0007049(cell cycle);GO:0007094(mitotic spindle…	ko03013(RNA transport)
PC-3p-12333_982	BGI_novel_T009373	1027	1052	1043	-42.7	-27.8	0.651054	7	1-5,1052-1048;7-15,1046-1038;17-24,1034-1027	6-6,1047-1047[SIL];16-16,1037-1035[AILt]	((((((((...(((((((((.(((((&))))).)))))))))--.))))))))	CUAGCAACAAAGAUAAAGCUGAACAG&UUGUUGGGCUUUAUC--AGUUGCUGG	1	33.3045	4	0.999993	Output/S8h/cleaveLand_result/t_plot/PC-3p-12333_982_BGI_novel_T009373_1043_TPlot.pdf	0	0	NA	NA	NA	33.3045	0	Inf	up	7.8779e-09	1.42259e-08	yes	NA	ko00071(Fatty acid degradation);ko01100(Metabolic pathways);ko04146(Peroxisome);ko01212(Fatty acid metabolism);ko00061(Fatty acid biosynthesis)
PC-3p-12333_982	BGI_novel_T010672	3606	3628	3619	-42.7	-29.9	0.700234	7.5	1-11,3628-3618;13-24,3617-3606	12-12,x-x[BULq]	((((((((((((-(((((((((((&))))))))))).))))))))))))	CCGGCAACUGGU-AGGCCUAGUAG&UUGUUGGGCUUUAUCAGUUGCUGG	0	0	NA	NA	NA	1	30.281	4	0.972676	Output/S0h/cleaveLand_result/t_plot/PC-3p-12333_982_BGI_novel_T010672_3619_TPlot.pdf	0	30.281	-Inf	down	3.7368e-08	4.29087e-08	yes	GO:0005623(cell);GO:0060255(regulation of macromolecule metabolic process);GO:0019219(regulation of nucleobase-containing compound metabolic process);GO:0044260(cellular macromolecule metabolic process);GO:0050789(regulation of biological process);GO:0019538(protein metabolic process);GO:0005737(cytoplasm);GO:2000112(regulation of cellular macromolecule biosynthetic process);GO:0044444(cytoplasmi…	ko00480(Glutathione metabolism);ko04016(MAPK signaling pathway - plant);ko04075(Plant hormone signal transduction)
PC-3p-12333_982	BGI_novel_T011295	1022	1045	1036	-42.7	-28.8	0.674473	11	1-4,1045-1042;6-6,1040-1040;8-9,1038-1037;12-24,1034-1022	5-5,1041-1041[SIL];7-7,1039-1039[SIL];10-11,1036-1035[SIL]	(((((((((((((..((.(.((((&)))).).))..)))))))))))))	CCGGCGACUGGUACUGCGCCGCAG&UUGUUGGGCUUUAUCAGUUGCUGG	1	33.3045	4	0.999322	Output/S8h/cleaveLand_result/t_plot/PC-3p-12333_982_BGI_novel_T011295_1036_TPlot.pdf	0	0	NA	NA	NA	33.3045	0	Inf	up	7.8779e-09	1.42259e-08	yes	GO:0046914(transition metal ion binding);GO:0008270(zinc ion binding);GO:0043169(cation binding);GO:0043167(ion binding);GO:0005488(binding);GO:0046872(metal ion binding)	ko03022(Basal transcription factors)
PC-3p-12333_982	XM_016077957.2	2854	2878	2868	-42.7	-28.76	0.673536	8	1-7,2878-2872;8-12,2870-2866;17-24,2861-2854	x-x,2871-2871[BULt];13-16,2865-2862[SIL]	((((((((....(((((.(((((((&)))))))-)))))....))))))))	CCAGCAACACCAGAAGCACCAGCAA&UUGUUGG-GCUUUAUCAGUUGCUGG	1	33.3045	4	0.999364	Output/S8h/cleaveLand_result/t_plot/PC-3p-12333_982_XM_016077957.2_2868_TPlot.pdf	0	0	NA	NA	NA	33.3045	0	Inf	up	7.8779e-09	1.42259e-08	yes	GO:0032555(purine ribonucleotide binding);GO:1901265(nucleoside phosphate binding);GO:0043168(anion binding);GO:0005524(ATP binding);GO:0008152(metabolic process);GO:0030554(adenyl nucleotide binding);GO:0035639(purine ribonucleoside triphosphate binding);GO:0016628(oxidoreductase activity, acting on the CH-CH group of donors, NAD or NADP as acceptor);GO:0055114(oxidation-reduction process);GO:00…	NA
PC-3p-12333_982	XM_016080573.2	3615	3637	3628	-42.7	-29.9	0.700234	7.5	1-11,3637-3627;13-24,3626-3615	12-12,x-x[BULq]	((((((((((((-(((((((((((&))))))))))).))))))))))))	CCGGCAACUGGU-AGGCCUAGUAG&UUGUUGGGCUUUAUCAGUUGCUGG	0	0	NA	NA	NA	1	30.281	4	0.97078	Output/S0h/cleaveLand_result/t_plot/PC-3p-12333_982_XM_016080573.2_3628_TPlot.pdf	0	30.281	-Inf	down	3.7368e-08	4.29087e-08	yes	GO:0005623(cell);GO:0060255(regulation of macromolecule metabolic process);GO:0019219(regulation of nucleobase-containing compound metabolic process);GO:0044260(cellular macromolecule metabolic process);GO:0050789(regulation of biological process);GO:0019538(protein metabolic process);GO:0005737(cytoplasm);GO:2000112(regulation of cellular macromolecule biosynthetic process);GO:0044444(cytoplasmi…	ko00480(Glutathione metabolism);ko04016(MAPK signaling pathway - plant);ko04075(Plant hormone signal transduction)
PC-3p-12333_982	XM_016083263.2	135	162	149	-42.7	-29.1	0.681499	12.5	1-6,162-157;7-15,152-144;17-24,142-135	x-x,156-153[BULt];16-16,143-143[SIL]	((((((((.(((((((((....((((((&))))))----))))))))).))))))))	CCAGCAACAGGUAGAGUCUUUGCAGCAA&UUGUUG----GGCUUUAUCAGUUGCUGG	1	33.3045	4	0.997519	Output/S8h/cleaveLand_result/t_plot/PC-3p-12333_982_XM_016083263.2_149_TPlot.pdf	0	0	NA	NA	NA	33.3045	0	Inf	up	7.8779e-09	1.42259e-08	yes	NA	NA
PC-3p-12333_982	XM_016083797.2	438	464	455	-42.7	-30.3	0.709602	11.5	1-11,464-454;12-19,450-443;21-24,441-438	x-x,453-451[BULt];20-20,442-442[SIL]	((((.((((((((...(((((((((((&)))))))))))---)))))))).))))	CCAGGAGCUGGUGGACAGGUCCAACAG&UUGUUGGGCUU---UAUCAGUUGCUGG	3	99.9134	2	0.509249	Output/S8h/cleaveLand_result/t_plot/PC-3p-12333_982_XM_016083797.2_455_TPlot.pdf	0	0	NA	NA	NA	99.9134	0	Inf	up	1.5881e-23	2.42062e-22	yes	GO:0009719(response to endogenous stimulus);GO:0042221(response to chemical);GO:0009725(response to hormone);GO:0050896(response to stimulus);GO:0010033(response to organic substance);GO:0009733(response to auxin)	ko04075(Plant hormone signal transduction)
PC-3p-12333_982	XM_016086989.2	1690	1714	1705	-42.7	-28.8	0.674473	9	3-16,1712-1699;18-24,1696-1690	1-2,1714-1713[UP5];17-17,1698-1697[AILt]	(((((((..((((((((((((((..&..))))))))))))))-.)))))))	UCAGCAGGAUGAUAAGGCUCAGCCU&UUGUUGGGCUUUAUCA-GUUGCUGG	0	0	NA	NA	NA	1	30.281	4	0.999454	Output/S0h/cleaveLand_result/t_plot/PC-3p-12333_982_XM_016086989.2_1705_TPlot.pdf	0	30.281	-Inf	down	3.7368e-08	4.29087e-08	yes	GO:0032549(ribonucleoside binding);GO:1901265(nucleoside phosphate binding);GO:0017111(nucleoside-triphosphatase activity);GO:0036094(small molecule binding);GO:0044249(cellular biosynthetic process);GO:0044238(primary metabolic process);GO:1901564(organonitrogen compound metabolic process);GO:0017076(purine nucleotide binding);GO:0003924(GTPase activity);GO:1901363(heterocyclic compound binding)…	ko03013(RNA transport)
PC-3p-12333_982	XM_016086990.2	1618	1642	1633	-42.7	-28.8	0.674473	9	3-16,1640-1627;18-24,1624-1618	1-2,1642-1641[UP5];17-17,1626-1625[AILt]	(((((((..((((((((((((((..&..))))))))))))))-.)))))))	UCAGCAGGAUGAUAAGGCUCAGCCU&UUGUUGGGCUUUAUCA-GUUGCUGG	2	66.6089	2	0.918397	Output/S8h/cleaveLand_result/t_plot/PC-3p-12333_982_XM_016086990.2_1633_TPlot.pdf	1	30.281	4	0.999554	Output/S0h/cleaveLand_result/t_plot/PC-3p-12333_982_XM_016086990.2_1633_TPlot.pdf	66.6089	30.281	1.1373	up	0.00022361	0.000246722	yes	GO:0032549(ribonucleoside binding);GO:1901265(nucleoside phosphate binding);GO:0017111(nucleoside-triphosphatase activity);GO:0036094(small molecule binding);GO:0044249(cellular biosynthetic process);GO:0044238(primary metabolic process);GO:1901564(organonitrogen compound metabolic process);GO:0017076(purine nucleotide binding);GO:0003924(GTPase activity);GO:1901363(heterocyclic compound binding)…	ko03013(RNA transport)
PC-3p-12333_982	XM_016089564.2	368	391	382	-42.7	-29.2	0.683841	6.5	2-12,390-380;15-20,377-372;23-24,369-368	1-1,391-391[UP5];13-14,379-378[SIL];21-22,371-370[SIL]	((..((((((..(((((((((((.&.)))))))))))..))))))..))	CCCUCAGCUGUGAAAGCCCAGCAU&UUGUUGGGCUUUAUCAGUUGCUGG	1	33.3045	4	0.996658	Output/S8h/cleaveLand_result/t_plot/PC-3p-12333_982_XM_016089564.2_382_TPlot.pdf	0	0	NA	NA	NA	33.3045	0	Inf	up	7.8779e-09	1.42259e-08	yes	NA	NA
PC-3p-12333_982	XM_016089734.2	285	309	300	-42.7	-28.1	0.65808	8.5	3-16,307-294;18-21,292-289;22-24,287-285	1-2,309-308[UP5];17-17,293-293[SIL];x-x,288-288[BULt]	(((.((((.((((((((((((((..&..)))))))))))))).))))-)))	CUAUGUAGGUGAUGAAGCCCAAUCC&UUGUUGGGCUUUAUCAGUUGC-UGG	0	0	NA	NA	NA	2	60.562	3	0.664141	Output/S0h/cleaveLand_result/t_plot/PC-3p-12333_982_XM_016089734.2_300_TPlot.pdf	0	60.562	-Inf	down	7.123e-15	2.99612e-14	yes	GO:0005524(ATP binding);GO:0035639(purine ribonucleoside triphosphate binding);GO:0017076(purine nucleotide binding);GO:0032553(ribonucleotide binding);GO:0032555(purine ribonucleotide binding);GO:1901265(nucleoside phosphate binding);GO:0097367(carbohydrate derivative binding);GO:0097159(organic cyclic compound binding);GO:0005488(binding);GO:1901363(heterocyclic compound binding);GO:0043167(ion…	NA
PC-3p-12333_982	XM_016094040.2	604	626	618	-42.7	-30.8	0.721311	10	2-9,625-618;13-16,615-612;18-24,610-604	1-1,626-626[UP5];10-12,617-616[AILq];17-17,611-611[SIL]	(((((((.((((..-((((((((.&.))))))))...)))).)))))))	CCAGCGAGUGGUCC-GCCCAGCAG&UUGUUGGGCUUUAUCAGUUGCUGG	1	33.3045	4	0.662078	Output/S8h/cleaveLand_result/t_plot/PC-3p-12333_982_XM_016094040.2_618_TPlot.pdf	0	0	NA	NA	NA	33.3045	0	Inf	up	7.8779e-09	1.42259e-08	yes	GO:0016616(oxidoreductase activity, acting on the CH-OH group of donors, NAD or NADP as acceptor);GO:0055114(oxidation-reduction process);GO:0008152(metabolic process);GO:0003824(catalytic activity);GO:0016614(oxidoreductase activity, acting on CH-OH group of donors);GO:0016491(oxidoreductase activity)	ko00053(Ascorbate and aldarate metabolism);ko01100(Metabolic pathways);ko01110(Biosynthesis of secondary metabolites)
PC-3p-12333_982	XM_016096512.2	2143	2166	2157	-42.7	-28.5	0.667447	6.5	2-3,2165-2164;5-14,2162-2153;17-24,2150-2143	1-1,2166-2166[UP5];4-4,2163-2163[SIL];15-16,2152-2151[SIL]	((((((((..((((((((((.((.&.)).))))))))))..))))))))	CCGGCAACCAAUAAAGCCUAUCAC&UUGUUGGGCUUUAUCAGUUGCUGG	0	0	NA	NA	NA	1	30.281	4	0.999857	Output/S0h/cleaveLand_result/t_plot/PC-3p-12333_982_XM_016096512.2_2157_TPlot.pdf	0	30.281	-Inf	down	3.7368e-08	4.29087e-08	yes	GO:0090304(nucleic acid metabolic process);GO:0044428(nuclear part);GO:0034660(ncRNA metabolic process);GO:0043414(macromolecule methylation);GO:1990904(ribonucleoprotein complex);GO:0031974(membrane-enclosed lumen);GO:0001510(RNA methylation);GO:0043412(macromolecule modification);GO:0046483(heterocycle metabolic process);GO:0016070(RNA metabolic process);GO:0016741(transferase activity, transfe…	NA
PC-3p-12333_982	XM_016096748.2	1188	1216	1202	-42.7	-28.2	0.660422	15.5	2-7,1215-1210;8-19,1204-1193;21-24,1191-1188	1-1,1216-1216[UP5];x-x,1209-1205[BULt];20-20,1192-1192[SIL]	((((.((((((((((((.....((((((.&.))))))-----)))))))))))).))))	CCAGGAAUUGAUGAGGUUUGCUCCAACAC&UUGUUGG-----GCUUUAUCAGUUGCUGG	0	0	NA	NA	NA	1	30.281	4	0.999976	Output/S0h/cleaveLand_result/t_plot/PC-3p-12333_982_XM_016096748.2_1202_TPlot.pdf	0	30.281	-Inf	down	3.7368e-08	4.29087e-08	yes	GO:0072655(establishment of protein localization to mitochondrion);GO:0031224(intrinsic component of membrane);GO:0070727(cellular macromolecule localization);GO:0032555(purine ribonucleotide binding);GO:0006886(intracellular protein transport);GO:0043226(organelle);GO:1901265(nucleoside phosphate binding);GO:0044429(mitochondrial part);GO:0015031(protein transport);GO:0044237(cellular metabolic …	NA
PC-3p-12333_982	XM_016096751.2	1072	1100	1086	-42.7	-28.2	0.660422	15.5	2-7,1099-1094;8-19,1088-1077;21-24,1075-1072	1-1,1100-1100[UP5];x-x,1093-1089[BULt];20-20,1076-1076[SIL]	((((.((((((((((((.....((((((.&.))))))-----)))))))))))).))))	CCAGGAAUUGAUGAGGUUUGCUCCAACAC&UUGUUGG-----GCUUUAUCAGUUGCUGG	1	33.3045	4	0.999962	Output/S8h/cleaveLand_result/t_plot/PC-3p-12333_982_XM_016096751.2_1086_TPlot.pdf	0	0	NA	NA	NA	33.3045	0	Inf	up	7.8779e-09	1.42259e-08	yes	GO:0072655(establishment of protein localization to mitochondrion);GO:0031224(intrinsic component of membrane);GO:0070727(cellular macromolecule localization);GO:0032555(purine ribonucleotide binding);GO:0006886(intracellular protein transport);GO:0043226(organelle);GO:1901265(nucleoside phosphate binding);GO:0044429(mitochondrial part);GO:0015031(protein transport);GO:0044237(cellular metabolic …	NA
PC-3p-12333_982	XM_016096813.2	308	333	324	-42.7	-28.7	0.672131	8	1-17,333-317;18-24,314-308	x-x,316-315[BULt]	(((((((..(((((((((((((((((&)))))))))))))))))--)))))))	UUAGCAAACUUGAUGAGGUCCAGCAG&UUGUUGGGCUUUAUCAG--UUGCUGG	1	33.3045	4	0.999391	Output/S8h/cleaveLand_result/t_plot/PC-3p-12333_982_XM_016096813.2_324_TPlot.pdf	0	0	NA	NA	NA	33.3045	0	Inf	up	7.8779e-09	1.42259e-08	yes	GO:0016020(membrane);GO:0016021(integral component of membrane);GO:0044425(membrane part);GO:0031224(intrinsic component of membrane)	ko00051(Fructose and mannose metabolism);ko01230(Biosynthesis of amino acids);ko00030(Pentose phosphate pathway);ko01100(Metabolic pathways);ko01040(Biosynthesis of unsaturated fatty acids);ko01200(Carbon metabolism);ko01212(Fatty acid metabolism);ko01110(Biosynthesis of secondary metabolites);ko00052(Galactose metabolism);ko00062(Fatty acid elongation);ko03018(RNA degradation);ko00010(Glycolysis…
PC-3p-12333_982	XM_016098183.2	1113	1137	1128	-42.7	-32	0.749415	7.5	2-6,1136-1132;8-13,1130-1125;14-23,1123-1114	1-1,1137-1137[UP5];7-7,1131-1131[SIL];x-x,1124-1124[BULt];24-24,1113-1113[UP3]	.((((((((((.((((((.(((((.&.))))).))))))-)))))))))).	GCAGCAGCUGAUUAAGGCGCAGCAC&UUGUUGGGCUUUA-UCAGUUGCUGG	1	33.3045	4	0.386937	Output/S8h/cleaveLand_result/t_plot/PC-3p-12333_982_XM_016098183.2_1128_TPlot.pdf	1	30.281	4	0.402071	Output/S0h/cleaveLand_result/t_plot/PC-3p-12333_982_XM_016098183.2_1128_TPlot.pdf	33.3045	30.281	0.137303	up	0.70456	0.704918	yes	NA	NA
PC-3p-12333_982	XM_016101716.2	568	595	585	-42.7	-31.5	0.737705	7	1-7,595-589;8-17,587-578;18-20,575-573;21-24,571-568	x-x,588-588[BULt];x-x,577-576[BULt];x-x,572-572[BULt]	((((.(((..((((((((((.(((((((&)))))))-))))))))))--)))-))))	CCAGACAAUUCUGAUGAAGCACCAGCAA&UUGUUGG-GCUUUAUCAG--UUG-CUGG	0	0	NA	NA	NA	1	30.281	4	0.60019	Output/S0h/cleaveLand_result/t_plot/PC-3p-12333_982_XM_016101716.2_585_TPlot.pdf	0	30.281	-Inf	down	3.7368e-08	4.29087e-08	yes	GO:0043229(intracellular organelle);GO:2000112(regulation of cellular macromolecule biosynthetic process);GO:0003677(DNA binding);GO:0050789(regulation of biological process);GO:0010468(regulation of gene expression);GO:0044464(cell part);GO:0051171(regulation of nitrogen compound metabolic process);GO:0006355(regulation of transcription, DNA-templated);GO:0019219(regulation of nucleobase-contain…	NA
PC-3p-12333_982	XM_016102403.2	1638	1663	1655	-42.7	-29.7	0.69555	8.5	1-8,1663-1656;10-18,1655-1647;19-23,1643-1639	9-9,x-x[BULq];x-x,1646-1644[BULt];24-24,1638-1638[UP3]	.(((((...(((((((((-((((((((&)))))))).)))))))))---))))).	GCAGCAUAUGCUGAUGAA-CCCAGCAA&UUGUUGGGCUUUAUCAGU---UGCUGG	0	0	NA	NA	NA	1	30.281	4	0.982134	Output/S0h/cleaveLand_result/t_plot/PC-3p-12333_982_XM_016102403.2_1655_TPlot.pdf	0	30.281	-Inf	down	3.7368e-08	4.29087e-08	yes	GO:0030276(clathrin binding);GO:0030135(coated vesicle);GO:0005622(intracellular);GO:0070271(protein complex biogenesis);GO:0005737(cytoplasm);GO:0022607(cellular component assembly);GO:0006461(protein complex assembly);GO:0044464(cell part);GO:0005488(binding);GO:0043933(macromolecular complex subunit organization);GO:0044085(cellular component biogenesis);GO:0065003(macromolecular complex assem…	NA
PC-3p-12333_982	XM_016107701.2	597	622	613	-42.7	-27.8	0.651054	7	1-5,622-618;7-15,616-608;17-24,604-597	6-6,617-617[SIL];16-16,607-605[AILt]	((((((((...(((((((((.(((((&))))).)))))))))--.))))))))	CUAGCAACAAAGAUAAAGCUGAACAG&UUGUUGGGCUUUAUC--AGUUGCUGG	0	0	NA	NA	NA	1	30.281	4	0.999997	Output/S0h/cleaveLand_result/t_plot/PC-3p-12333_982_XM_016107701.2_613_TPlot.pdf	0	30.281	-Inf	down	3.7368e-08	4.29087e-08	yes	NA	NA
PC-3p-12333_982	XM_016109399.2	510	533	524	-42.7	-27.9	0.653396	10	3-12,531-522;14-18,520-516;20-22,514-512	1-2,533-532[UP5];13-13,521-521[SIL];19-19,515-515[SIL];23-24,511-510[UP3]	..(((.(((((.((((((((((..&..)))))))))).))))).)))..	CAAGCUGCUGGCGAGGCCCAACGU&UUGUUGGGCUUUAUCAGUUGCUGG	3	99.9134	2	0.981591	Output/S8h/cleaveLand_result/t_plot/PC-3p-12333_982_XM_016109399.2_524_TPlot.pdf	1	30.281	4	0.999995	Output/S0h/cleaveLand_result/t_plot/PC-3p-12333_982_XM_016109399.2_524_TPlot.pdf	99.9134	30.281	1.72227	up	1.0422e-09	4.10813e-09	yes	GO:0005737(cytoplasm);GO:0006950(response to stress);GO:0008152(metabolic process);GO:0009987(cellular process);GO:0071704(organic substance metabolic process);GO:0006767(water-soluble vitamin metabolic process);GO:0019438(aromatic compound biosynthetic process);GO:0006725(cellular aromatic compound metabolic process);GO:0044446(intracellular organelle part);GO:0043227(membrane-bounded organelle)…	ko00730(Thiamine metabolism);ko01100(Metabolic pathways)
PC-3p-12333_982	XM_016111496.2	723	747	738	-42.7	-27.8	0.651054	7	2-2,746-746;4-14,744-734;17-18,731-730;19-24,728-723	1-1,747-747[UP5];3-3,745-745[SIL];15-16,733-732[SIL];x-x,729-729[BULt]	((((((.((..(((((((((((.(.&.).)))))))))))..))-))))))	CCAGCAGACCCAUGAAGCCCAAGAU&UUGUUGGGCUUUAUCAGU-UGCUGG	0	0	NA	NA	NA	1	30.281	4	0.999997	Output/S0h/cleaveLand_result/t_plot/PC-3p-12333_982_XM_016111496.2_738_TPlot.pdf	0	30.281	-Inf	down	3.7368e-08	4.29087e-08	yes	GO:0016021(integral component of membrane);GO:0044425(membrane part);GO:0031224(intrinsic component of membrane);GO:0016020(membrane)	NA
PC-3p-12333_982	XM_016112947.2	476	501	490	-42.7	-29.2	0.683841	13	1-7,501-495;8-21,492-479	x-x,494-493[BULt];22-24,478-476[UP3]	...((((((((((((((..(((((((&)))))))--))))))))))))))...	GUCGCAGCUGGUGGAGCCACCGGCGA&UUGUUGG--GCUUUAUCAGUUGCUGG	0	0	NA	NA	NA	1	30.281	4	0.997446	Output/S0h/cleaveLand_result/t_plot/PC-3p-12333_982_XM_016112947.2_490_TPlot.pdf	0	30.281	-Inf	down	3.7368e-08	4.29087e-08	yes	NA	NA
PC-3p-12333_982	XM_016117396.2	1293	1314	1307	-42.7	-30	0.702576	11.5	2-8,1313-1307;12-24,1305-1293	1-1,1314-1314[UP5];9-11,1306-1306[AILq]	(((((((((((((.--(((((((.&.)))))))...)))))))))))))	CCGGCGGCUGAUGC--CCCGGCAG&UUGUUGGGCUUUAUCAGUUGCUGG	2	66.6089	3	0.262213	Output/S8h/cleaveLand_result/t_plot/PC-3p-12333_982_XM_016117396.2_1307_TPlot.pdf	10	302.81	2	0.681574	Output/S0h/cleaveLand_result/t_plot/PC-3p-12333_982_XM_016117396.2_1307_TPlot.pdf	66.6089	302.81	-2.18463	down	1.0213e-34	4.00883e-33	yes	NA	NA
PC-3p-12333_982	XM_021127687.1	1359	1383	1373	-42.7	-30.2	0.70726	6	2-8,1382-1376;9-18,1374-1365;20-24,1363-1359	1-1,1383-1383[UP5];x-x,1375-1375[BULt];19-19,1364-1364[SIL]	(((((.((((((((((.(((((((.&.)))))))-)))))))))).)))))	CUGGUUGCUGAUAAAGUCCCAACAC&UUGUUGGG-CUUUAUCAGUUGCUGG	1	33.3045	4	0.923776	Output/S8h/cleaveLand_result/t_plot/PC-3p-12333_982_XM_021127687.1_1373_TPlot.pdf	0	0	NA	NA	NA	33.3045	0	Inf	up	7.8779e-09	1.42259e-08	yes	GO:0016787(hydrolase activity);GO:0009251(glucan catabolic process);GO:0044238(primary metabolic process);GO:0004553(hydrolase activity, hydrolyzing O-glycosyl compounds);GO:0043170(macromolecule metabolic process);GO:0009056(catabolic process);GO:0008152(metabolic process);GO:0016052(carbohydrate catabolic process);GO:0009057(macromolecule catabolic process);GO:0005975(carbohydrate metabolic pro…	ko00940(Phenylpropanoid biosynthesis);ko01100(Metabolic pathways);ko00460(Cyanoamino acid metabolism);ko00500(Starch and sucrose metabolism);ko01110(Biosynthesis of secondary metabolites)
PC-3p-12333_982	XM_021128888.1	462	485	476	-42.7	-30.4	0.711944	10.5	2-5,484-481;7-10,479-476;13-24,473-462	1-1,485-485[UP5];6-6,480-480[SIL];11-12,475-474[SIL]	((((((((((((..((((.((((.&.)))).))))..))))))))))))	CCAGCAAUUGAUUUGGCUGAGCAU&UUGUUGGGCUUUAUCAGUUGCUGG	0	0	NA	NA	NA	1	30.281	4	0.750009	Output/S0h/cleaveLand_result/t_plot/PC-3p-12333_982_XM_021128888.1_476_TPlot.pdf	0	30.281	-Inf	down	3.7368e-08	4.29087e-08	yes	GO:0008270(zinc ion binding);GO:0044425(membrane part);GO:0016020(membrane);GO:0016021(integral component of membrane);GO:0031224(intrinsic component of membrane);GO:0005488(binding);GO:0043169(cation binding);GO:0043167(ion binding);GO:0046872(metal ion binding);GO:0046914(transition metal ion binding)	NA
PC-3p-12333_982	XM_021131518.1	1527	1551	1542	-42.7	-28.8	0.674473	9	3-16,1549-1536;18-24,1533-1527	1-2,1551-1550[UP5];17-17,1535-1534[AILt]	(((((((..((((((((((((((..&..))))))))))))))-.)))))))	UCAGCAGGAUGAUAAGGCUCAGCCU&UUGUUGGGCUUUAUCA-GUUGCUGG	0	0	NA	NA	NA	1	30.281	4	0.999523	Output/S0h/cleaveLand_result/t_plot/PC-3p-12333_982_XM_021131518.1_1542_TPlot.pdf	0	30.281	-Inf	down	3.7368e-08	4.29087e-08	yes	GO:0032549(ribonucleoside binding);GO:1901265(nucleoside phosphate binding);GO:0017111(nucleoside-triphosphatase activity);GO:0036094(small molecule binding);GO:0044249(cellular biosynthetic process);GO:0044238(primary metabolic process);GO:1901564(organonitrogen compound metabolic process);GO:0017076(purine nucleotide binding);GO:0003924(GTPase activity);GO:1901363(heterocyclic compound binding)…	ko03013(RNA transport)
PC-3p-12333_982	XM_021137292.1	957	985	971	-42.7	-28.2	0.660422	15.5	2-7,984-979;8-19,973-962;21-24,960-957	1-1,985-985[UP5];x-x,978-974[BULt];20-20,961-961[SIL]	((((.((((((((((((.....((((((.&.))))))-----)))))))))))).))))	CCAGGAAUUGAUGAGGUUUGCUCCAACAC&UUGUUGG-----GCUUUAUCAGUUGCUGG	0	0	NA	NA	NA	1	30.281	4	0.999973	Output/S0h/cleaveLand_result/t_plot/PC-3p-12333_982_XM_021137292.1_971_TPlot.pdf	0	30.281	-Inf	down	3.7368e-08	4.29087e-08	yes	GO:0072655(establishment of protein localization to mitochondrion);GO:0031224(intrinsic component of membrane);GO:0070727(cellular macromolecule localization);GO:0032555(purine ribonucleotide binding);GO:0006886(intracellular protein transport);GO:0043226(organelle);GO:1901265(nucleoside phosphate binding);GO:0044429(mitochondrial part);GO:0015031(protein transport);GO:0044237(cellular metabolic …	NA
PC-3p-12333_982	XM_021137293.1	1051	1079	1065	-42.7	-28.2	0.660422	15.5	2-7,1078-1073;8-19,1067-1056;21-24,1054-1051	1-1,1079-1079[UP5];x-x,1072-1068[BULt];20-20,1055-1055[SIL]	((((.((((((((((((.....((((((.&.))))))-----)))))))))))).))))	CCAGGAAUUGAUGAGGUUUGCUCCAACAC&UUGUUGG-----GCUUUAUCAGUUGCUGG	1	33.3045	4	0.999967	Output/S8h/cleaveLand_result/t_plot/PC-3p-12333_982_XM_021137293.1_1065_TPlot.pdf	0	0	NA	NA	NA	33.3045	0	Inf	up	7.8779e-09	1.42259e-08	yes	GO:0072655(establishment of protein localization to mitochondrion);GO:0031224(intrinsic component of membrane);GO:0070727(cellular macromolecule localization);GO:0032555(purine ribonucleotide binding);GO:0006886(intracellular protein transport);GO:0043226(organelle);GO:1901265(nucleoside phosphate binding);GO:0044429(mitochondrial part);GO:0015031(protein transport);GO:0044237(cellular metabolic …	NA
PC-3p-12333_982	XM_021137298.1	816	844	830	-42.7	-28.2	0.660422	15.5	2-7,843-838;8-19,832-821;21-24,819-816	1-1,844-844[UP5];x-x,837-833[BULt];20-20,820-820[SIL]	((((.((((((((((((.....((((((.&.))))))-----)))))))))))).))))	CCAGGAAUUGAUGAGGUUUGCUCCAACAC&UUGUUGG-----GCUUUAUCAGUUGCUGG	0	0	NA	NA	NA	1	30.281	4	0.999969	Output/S0h/cleaveLand_result/t_plot/PC-3p-12333_982_XM_021137298.1_830_TPlot.pdf	0	30.281	-Inf	down	3.7368e-08	4.29087e-08	yes	GO:0072655(establishment of protein localization to mitochondrion);GO:0031224(intrinsic component of membrane);GO:0070727(cellular macromolecule localization);GO:0032555(purine ribonucleotide binding);GO:0006886(intracellular protein transport);GO:0043226(organelle);GO:1901265(nucleoside phosphate binding);GO:0044429(mitochondrial part);GO:0015031(protein transport);GO:0044237(cellular metabolic …	NA
PC-3p-12333_982	XM_021137300.1	886	914	900	-42.7	-28.2	0.660422	15.5	2-7,913-908;8-19,902-891;21-24,889-886	1-1,914-914[UP5];x-x,907-903[BULt];20-20,890-890[SIL]	((((.((((((((((((.....((((((.&.))))))-----)))))))))))).))))	CCAGGAAUUGAUGAGGUUUGCUCCAACAC&UUGUUGG-----GCUUUAUCAGUUGCUGG	1	33.3045	4	0.999953	Output/S8h/cleaveLand_result/t_plot/PC-3p-12333_982_XM_021137300.1_900_TPlot.pdf	0	0	NA	NA	NA	33.3045	0	Inf	up	7.8779e-09	1.42259e-08	yes	GO:0072655(establishment of protein localization to mitochondrion);GO:0031224(intrinsic component of membrane);GO:0070727(cellular macromolecule localization);GO:0032555(purine ribonucleotide binding);GO:0006886(intracellular protein transport);GO:0043226(organelle);GO:1901265(nucleoside phosphate binding);GO:0044429(mitochondrial part);GO:0015031(protein transport);GO:0044237(cellular metabolic …	NA
PC-3p-12333_982	XM_021143003.1	274	297	288	-42.7	-28.2	0.660422	8	1-5,297-293;7-12,291-286;14-22,284-276	6-6,292-292[SIL];13-13,285-285[SIL];23-24,275-274[UP3]	..(((((((((.((((((.(((((&))))).)))))).)))))))))..	GAGGCAGCUGAAGAAGCUGAACAA&UUGUUGGGCUUUAUCAGUUGCUGG	1	33.3045	4	0.999961	Output/S8h/cleaveLand_result/t_plot/PC-3p-12333_982_XM_021143003.1_288_TPlot.pdf	0	0	NA	NA	NA	33.3045	0	Inf	up	7.8779e-09	1.42259e-08	yes	GO:0005622(intracellular);GO:0009987(cellular process);GO:0003886(DNA (cytosine-5-)-methyltransferase activity);GO:0044238(primary metabolic process);GO:0006304(DNA modification);GO:0044237(cellular metabolic process);GO:0090116(C-5 methylation of cytosine);GO:0006305(DNA alkylation);GO:0003824(catalytic activity);GO:0006259(DNA metabolic process);GO:0005623(cell);GO:1901360(organic cyclic compou…	ko01100(Metabolic pathways);ko00270(Cysteine and methionine metabolism)
PC-3p-123460_58	BGI_novel_T006070	287	310	301	-38.7	-26.1	0.674419	8.5	1-10,310-301;12-14,299-297;16-22,295-289	11-11,300-300[SIL];15-15,296-296[SIL];23-24,288-287[UP3]	..(((((((.(((.((((((((((&)))))))))).))).)))))))..	GCUCAGGCCGUCUUGUUUGUGUUU&AAAUACAAAUCGGAGGGUCUGAUU	1	33.3045	4	0.714961	Output/S8h/cleaveLand_result/t_plot/PC-3p-123460_58_BGI_novel_T006070_301_TPlot.pdf	0	0	NA	NA	NA	33.3045	0	Inf	up	7.8779e-09	1.42259e-08	yes	GO:0071556(integral component of lumenal side of endoplasmic reticulum membrane);GO:0006518(peptide metabolic process);GO:0098827(endoplasmic reticulum subcompartment);GO:0097708(intracellular vesicle);GO:0043603(cellular amide metabolic process);GO:0004175(endopeptidase activity);GO:0016787(hydrolase activity);GO:0031984(organelle subcompartment);GO:0098553(lumenal side of endoplasmic reticulum …	NA
PC-3p-123460_58	XM_016098700.2	1078	1100	1091	-38.7	-25.6	0.661499	9.5	2-6,1099-1095;8-13,1093-1088;15-21,1087-1081	1-1,1100-1100[UP5];7-7,1094-1094[SIL];14-14,x-x[BULq];22-24,1080-1078[UP3]	...(((((((-((((((.(((((.&.))))).)))))).)))))))...	AACCGGACCC-CCGGUUCGUGUUC&AAAUACAAAUCGGAGGGUCUGAUU	0	0	NA	NA	NA	1	30.281	4	0.808841	Output/S0h/cleaveLand_result/t_plot/PC-3p-123460_58_XM_016098700.2_1091_TPlot.pdf	0	30.281	-Inf	down	3.7368e-08	4.29087e-08	yes	NA	ko03040(Spliceosome)
PC-3p-123460_58	XM_016117292.2	1880	1903	1894	-38.7	-25.5	0.658915	14.5	6-8,1898-1896;10-21,1894-1883	1-5,1903-1899[UP5];9-9,1895-1895[SIL];22-24,1882-1880[UP3]	...((((((((((((.(((.....&.....))).))))))))))))...	AUCCAGAUCCUCCGAGUUGGACAG&AAAUACAAAUCGGAGGGUCUGAUU	2	66.6089	2	0.45276	Output/S8h/cleaveLand_result/t_plot/PC-3p-123460_58_XM_016117292.2_1894_TPlot.pdf	0	0	NA	NA	NA	66.6089	0	Inf	up	3.3071e-16	2.0359e-15	yes	GO:0016020(membrane);GO:0016021(integral component of membrane);GO:0031224(intrinsic component of membrane);GO:0044425(membrane part)	ko01100(Metabolic pathways);ko00600(Sphingolipid metabolism)
PC-3p-123460_58	XM_021128730.1	1178	1200	1191	-38.7	-25.6	0.661499	9.5	3-17,1198-1184;19-21,1183-1181	1-2,1200-1199[UP5];18-18,x-x[BULq];22-24,1180-1178[UP3]	...(((-(((((((((((((((..&..))))))))))))))).)))...	UACCAG-CCUUCUGAUUUGUGUAG&AAAUACAAAUCGGAGGGUCUGAUU	0	0	NA	NA	NA	1	30.281	4	0.821244	Output/S0h/cleaveLand_result/t_plot/PC-3p-123460_58_XM_021128730.1_1191_TPlot.pdf	0	30.281	-Inf	down	3.7368e-08	4.29087e-08	yes	GO:0044464(cell part);GO:0016021(integral component of membrane);GO:0016020(membrane);GO:0044425(membrane part);GO:0043231(intracellular membrane-bounded organelle);GO:0044424(intracellular part);GO:0043229(intracellular organelle);GO:0043226(organelle);GO:0043227(membrane-bounded organelle);GO:0005622(intracellular);GO:0005623(cell);GO:0005634(nucleus);GO:0031224(intrinsic component of membrane)	NA
PC-3p-123460_58	XM_021128731.1	1088	1110	1101	-38.7	-25.6	0.661499	9.5	3-17,1108-1094;19-21,1093-1091	1-2,1110-1109[UP5];18-18,x-x[BULq];22-24,1090-1088[UP3]	...(((-(((((((((((((((..&..))))))))))))))).)))...	UACCAG-CCUUCUGAUUUGUGUAG&AAAUACAAAUCGGAGGGUCUGAUU	0	0	NA	NA	NA	1	30.281	4	0.813068	Output/S0h/cleaveLand_result/t_plot/PC-3p-123460_58_XM_021128731.1_1101_TPlot.pdf	0	30.281	-Inf	down	3.7368e-08	4.29087e-08	yes	GO:0044464(cell part);GO:0016021(integral component of membrane);GO:0016020(membrane);GO:0044425(membrane part);GO:0043231(intracellular membrane-bounded organelle);GO:0044424(intracellular part);GO:0043229(intracellular organelle);GO:0043226(organelle);GO:0043227(membrane-bounded organelle);GO:0005622(intracellular);GO:0005623(cell);GO:0005634(nucleus);GO:0031224(intrinsic component of membrane)	NA
PC-3p-123460_58	XM_021128732.1	1178	1200	1191	-38.7	-25.6	0.661499	9.5	3-17,1198-1184;19-21,1183-1181	1-2,1200-1199[UP5];18-18,x-x[BULq];22-24,1180-1178[UP3]	...(((-(((((((((((((((..&..))))))))))))))).)))...	UACCAG-CCUUCUGAUUUGUGUAG&AAAUACAAAUCGGAGGGUCUGAUU	0	0	NA	NA	NA	1	30.281	4	0.804519	Output/S0h/cleaveLand_result/t_plot/PC-3p-123460_58_XM_021128732.1_1191_TPlot.pdf	0	30.281	-Inf	down	3.7368e-08	4.29087e-08	yes	GO:0044464(cell part);GO:0016021(integral component of membrane);GO:0016020(membrane);GO:0044425(membrane part);GO:0043231(intracellular membrane-bounded organelle);GO:0044424(intracellular part);GO:0043229(intracellular organelle);GO:0043226(organelle);GO:0043227(membrane-bounded organelle);GO:0005622(intracellular);GO:0005623(cell);GO:0005634(nucleus);GO:0031224(intrinsic component of membrane)	NA
PC-3p-124350_58	BGI_novel_T003600	789	811	802	-36.6	-25.8	0.704918	8	4-12,808-800;14-19,799-794;21-24,792-789	1-3,811-809[UP5];13-13,x-x[BULq];20-20,793-793[SIL]	((((.((((((-(((((((((...&...))))))))).)))))).))))	GGUAUAUCCGC-AUCCGAUCUCAG&AUAAGAUCGGAUUGUGGAUUUAUC	1	33.3045	4	0.208644	Output/S8h/cleaveLand_result/t_plot/PC-3p-124350_58_BGI_novel_T003600_802_TPlot.pdf	0	0	NA	NA	NA	33.3045	0	Inf	up	7.8779e-09	1.42259e-08	yes	NA	ko03420(Nucleotide excision repair);ko03430(Mismatch repair);ko03030(DNA replication);ko03440(Homologous recombination)
PC-3p-124350_58	BGI_novel_T003932	204	226	217	-36.6	-24.3	0.663934	9.5	4-12,223-215;14-22,214-206	1-3,226-224[UP5];13-13,x-x[BULq];23-24,205-204[UP3]	..(((((((((-(((((((((...&...))))))))).)))))))))..	UCUGAAUCCAC-AUCUGAUCUAAG&AUAAGAUCGGAUUGUGGAUUUAUC	1	33.3045	4	0.696176	Output/S8h/cleaveLand_result/t_plot/PC-3p-124350_58_BGI_novel_T003932_217_TPlot.pdf	0	0	NA	NA	NA	33.3045	0	Inf	up	7.8779e-09	1.42259e-08	yes	NA	NA
PC-3p-124350_58	XM_016079644.2	1371	1403	1394	-36.6	-25.5	0.696721	22.5	2-12,1402-1392;13-13,1382-1382;15-24,1380-1371	1-1,1403-1403[UP5];x-x,1391-1383[BULt];14-14,1381-1381[SIL]	((((((((((.(.........(((((((((((.&.)))))))))))---------).))))))))))	GGUAAGUCCAGGAGCAUGGCUGUCCGAUCUUAC&AUAAGAUCGGAU---------UGUGGAUUUAUC	0	0	NA	NA	NA	1	30.281	4	0.360586	Output/S0h/cleaveLand_result/t_plot/PC-3p-124350_58_XM_016079644.2_1394_TPlot.pdf	0	30.281	-Inf	down	3.7368e-08	4.29087e-08	yes	NA	NA
PC-3p-124350_58	XM_016082326.1	297	321	312	-36.6	-24.6	0.672131	13	7-21,315-301;23-24,298-297	1-6,321-316[UP5];22-22,300-299[AILt]	((..(((((((((((((((......&......)))))))))))))))-.))	GAGCAAAUCCACAAUCCGAACACCU&AUAAGAUCGGAUUGUGGAUUU-AUC	1	33.3045	4	0.607817	Output/S8h/cleaveLand_result/t_plot/PC-3p-124350_58_XM_016082326.1_312_TPlot.pdf	0	0	NA	NA	NA	33.3045	0	Inf	up	7.8779e-09	1.42259e-08	yes	NA	NA
PC-3p-124350_58	XM_016088092.2	300	323	314	-36.6	-24.4	0.666667	12.5	5-21,319-303;24-24,300-300	1-4,323-320[UP5];22-23,302-301[SIL]	(..(((((((((((((((((....&....)))))))))))))))))..)	GUGAGGUCCACGGUUCGAUCCCAC&AUAAGAUCGGAUUGUGGAUUUAUC	1	33.3045	4	0.654813	Output/S8h/cleaveLand_result/t_plot/PC-3p-124350_58_XM_016088092.2_314_TPlot.pdf	2	60.562	3	0.103758	Output/S0h/cleaveLand_result/t_plot/PC-3p-124350_58_XM_016088092.2_314_TPlot.pdf	33.3045	60.562	-0.862697	down	0.0049011	0.0052713	yes	GO:0046872(metal ion binding);GO:0009636(response to toxic substance);GO:0006979(response to oxidative stress);GO:0009664(plant-type cell wall organization);GO:0042743(hydrogen peroxide metabolic process);GO:0005488(binding);GO:0050896(response to stimulus);GO:0005618(cell wall);GO:0009505(plant-type cell wall);GO:0016043(cellular component organization);GO:0071554(cell wall organization or bioge…	ko00940(Phenylpropanoid biosynthesis);ko01100(Metabolic pathways);ko01110(Biosynthesis of secondary metabolites)
PC-3p-124350_58	XM_016092863.2	534	560	551	-36.6	-24.3	0.663934	15	4-12,557-549;13-21,545-537	1-3,560-558[UP5];x-x,548-546[BULt];22-24,536-534[UP3]	...(((((((((...(((((((((...&...)))))))))---)))))))))...	UCCAAGUCCGCAAUCAUCCGAUCUACA&AUAAGAUCGGAU---UGUGGAUUUAUC	5	166.522	2	0.389768	Output/S8h/cleaveLand_result/t_plot/PC-3p-124350_58_XM_016092863.2_551_TPlot.pdf	2	60.562	3	0.138414	Output/S0h/cleaveLand_result/t_plot/PC-3p-124350_58_XM_016092863.2_551_TPlot.pdf	166.522	60.562	1.45923	up	2.037e-12	8.32538e-12	yes	NA	NA
PC-3p-124350_58	XM_021133820.1	470	493	484	-36.6	-25.7	0.702186	8	1-11,493-483;13-20,481-474	12-12,482-482[SIL];21-24,473-470[UP3]	....((((((((.(((((((((((&))))))))))).))))))))....	UUUCAAUCCACACUCUGAUCUUGU&AUAAGAUCGGAUUGUGGAUUUAUC	0	0	NA	NA	NA	1	30.281	4	0.268781	Output/S0h/cleaveLand_result/t_plot/PC-3p-124350_58_XM_021133820.1_484_TPlot.pdf	0	30.281	-Inf	down	3.7368e-08	4.29087e-08	yes	GO:0031224(intrinsic component of membrane);GO:0016020(membrane);GO:0044425(membrane part);GO:0016021(integral component of membrane)	NA
PC-3p-124677_58	XM_016076322.2	482	510	495	-43.7	-29.1	0.665904	15	2-6,509-505;7-9,502-500;10-16,495-489;18-24,488-482	1-1,510-510[UP5];x-x,504-503[BULt];x-x,499-496[BULt];17-17,x-x[BULq]	(((((((-(((((((....(((..(((((.&.)))))--)))----))))))).)))))))	GGUACAG-AAUCGGAGAAGGCGGUUCCGAG&AUCGGA--CGU----UCCGAUUUCUGUACC	0	0	NA	NA	NA	1	30.281	4	0.60019	Output/S0h/cleaveLand_result/t_plot/PC-3p-124677_58_XM_016076322.2_495_TPlot.pdf	0	30.281	-Inf	down	3.7368e-08	4.29087e-08	yes	GO:0065007(biological regulation);GO:2001141(regulation of RNA biosynthetic process);GO:0019219(regulation of nucleobase-containing compound metabolic process);GO:0050794(regulation of cellular process);GO:0005622(intracellular);GO:0031323(regulation of cellular metabolic process);GO:0003677(DNA binding);GO:2000112(regulation of cellular macromolecule biosynthetic process);GO:1901363(heterocyclic…	ko04016(MAPK signaling pathway - plant)
PC-3p-124677_58	XM_016092951.2	4410	4431	4422	-43.7	-29.6	0.677346	8	2-4,4430-4428;7-12,4425-4420;15-24,4419-4410	1-1,4431-4431[UP5];5-6,4427-4426[SIL];13-14,x-x[BULq]	((((((((((--((((((..(((.&.)))..))))))..))))))))))	GGUGCAGAAG--GGAACGGACGAG&AUCGGACGUUCCGAUUUCUGUACC	3	99.9134	2	0.11616	Output/S8h/cleaveLand_result/t_plot/PC-3p-124677_58_XM_016092951.2_4422_TPlot.pdf	0	0	NA	NA	NA	99.9134	0	Inf	up	1.5881e-23	2.42062e-22	yes	GO:0005515(protein binding);GO:0016772(transferase activity, transferring phosphorus-containing groups);GO:0003779(actin binding);GO:0006796(phosphate-containing compound metabolic process);GO:0009987(cellular process);GO:0016740(transferase activity);GO:0016301(kinase activity);GO:0016310(phosphorylation);GO:0006793(phosphorus metabolic process);GO:0003824(catalytic activity);GO:0005488(binding)…	NA
PC-3p-124677_58	XM_016108371.2	1505	1536	1527	-43.7	-28.6	0.654462	14	2-3,1535-1534;5-15,1532-1522;16-24,1513-1505	1-1,1536-1536[UP5];4-4,1533-1533[SIL];x-x,1521-1514[BULt]	(((((((((........(((((((((((.((.&.)).)))))))))))--------)))))))))	GGUACAGGGUGGUUAUUAUCGGAAUGUUGGAA&AUCGGACGUUCCGAU--------UUCUGUACC	1	33.3045	4	0.764628	Output/S8h/cleaveLand_result/t_plot/PC-3p-124677_58_XM_016108371.2_1527_TPlot.pdf	0	0	NA	NA	NA	33.3045	0	Inf	up	7.8779e-09	1.42259e-08	yes	GO:0006820(anion transport);GO:0051234(establishment of localization);GO:0015098(molybdate ion transmembrane transporter activity);GO:0022857(transmembrane transporter activity);GO:0051179(localization);GO:0008509(anion transmembrane transporter activity);GO:0006811(ion transport);GO:0015075(ion transmembrane transporter activity);GO:0031224(intrinsic component of membrane);GO:0015698(inorganic a…	NA
PC-3p-127107_56	BGI_novel_T000220	1878	1898	1889	-36.6	-27.1	0.740437	11	6-20,1893-1879	1-5,1898-1894[UP5];21-21,1878-1878[UP3]	.(((((((((((((((.....&.....))))))))))))))).	AAUGGUUCCAAGGUUCAAAAU&UCUAAGAGCCUUGGAACCAUA	3	99.9134	2	0.357938	Output/S8h/cleaveLand_result/t_plot/PC-3p-127107_56_BGI_novel_T000220_1889_TPlot.pdf	1	30.281	4	0.744356	Output/S0h/cleaveLand_result/t_plot/PC-3p-127107_56_BGI_novel_T000220_1889_TPlot.pdf	99.9134	30.281	1.72227	up	1.0422e-09	4.10813e-09	yes	GO:0016705(oxidoreductase activity, acting on paired donors, with incorporation or reduction of molecular oxygen);GO:0046872(metal ion binding);GO:0043167(ion binding);GO:0016021(integral component of membrane);GO:0046906(tetrapyrrole binding);GO:0008152(metabolic process);GO:0016020(membrane);GO:0044425(membrane part);GO:0031224(intrinsic component of membrane);GO:0004497(monooxygenase activity)…	ko00906(Carotenoid biosynthesis)
PC-3p-127107_56	BGI_novel_T007753	1363	1384	1374	-36.6	-24.2	0.661202	7	1-8,1384-1377;9-16,1375-1368	x-x,1376-1376[BULt];17-21,1367-1363[UP3]	.....((((((((.((((((((&))))))))-)))))))).....	AGCUAUUCCAAGGACUCUUAGA&UCUAAGAG-CCUUGGAACCAUA	0	0	NA	NA	NA	1	30.281	4	0.999971	Output/S0h/cleaveLand_result/t_plot/PC-3p-127107_56_BGI_novel_T007753_1374_TPlot.pdf	0	30.281	-Inf	down	3.7368e-08	4.29087e-08	yes	GO:0016070(RNA metabolic process);GO:0009451(RNA modification);GO:0071704(organic substance metabolic process);GO:0005623(cell);GO:0003723(RNA binding);GO:0046483(heterocycle metabolic process);GO:0043231(intracellular membrane-bounded organelle);GO:0001522(pseudouridine synthesis);GO:0097159(organic cyclic compound binding);GO:0006139(nucleobase-containing compound metabolic process);GO:0043229(…	NA
PC-3p-127107_56	BGI_novel_T008808	559	581	571	-36.6	-24.6	0.672131	8	1-2,581-580;3-16,578-565;17-18,563-562	x-x,579-579[BULt];x-x,564-564[BULt];19-21,561-559[UP3]	...((.((((((((((((((.((&))-))))))))))))))-))...	UAAGGUUUCCAAGGUUCUUGUGA&UC-UAAGAGCCUUGGAA-CCAUA	1	33.3045	4	0.999006	Output/S8h/cleaveLand_result/t_plot/PC-3p-127107_56_BGI_novel_T008808_571_TPlot.pdf	0	0	NA	NA	NA	33.3045	0	Inf	up	7.8779e-09	1.42259e-08	yes	GO:0006351(transcription, DNA-templated);GO:0071704(organic substance metabolic process);GO:0009058(biosynthetic process);GO:0043226(organelle);GO:0034654(nucleobase-containing compound biosynthetic process);GO:0032774(RNA biosynthetic process);GO:0003700(DNA binding transcription factor activity);GO:0043229(intracellular organelle);GO:0006725(cellular aromatic compound metabolic process);GO:0009…	ko04626(Plant-pathogen interaction);ko04016(MAPK signaling pathway - plant)
PC-3p-127107_56	BGI_novel_T008812	2017	2038	2029	-36.6	-24.4	0.666667	12	6-13,2033-2026;14-19,2024-2019	1-5,2038-2034[UP5];x-x,2025-2025[BULt];20-21,2018-2017[UP3]	..((((((.((((((((.....&.....))))))))-))))))..	UCUGGUUCACAAGGCUCAUCUA&UCUAAGAGCCUUG-GAACCAUA	0	0	NA	NA	NA	2	60.562	2	0.955422	Output/S0h/cleaveLand_result/t_plot/PC-3p-127107_56_BGI_novel_T008812_2029_TPlot.pdf	0	60.562	-Inf	down	7.123e-15	2.99612e-14	yes	GO:0044425(membrane part);GO:0016020(membrane);GO:0016021(integral component of membrane);GO:0031224(intrinsic component of membrane)	NA
PC-3p-127107_56	BGI_novel_T008904	2588	2611	2599	-36.6	-26.3	0.718579	11	1-3,2611-2609;4-6,2604-2602;8-20,2601-2589	x-x,2608-2605[BULt];7-7,x-x[BULq];21-21,2588-2588[UP3]	.(((((((((((((-(((....(((&)))----))).))))))))))))).	GAUGGUUCCAAGGC-CUUCCCAAGA&UCU----AAGAGCCUUGGAACCAUA	2	66.6089	2	0.516327	Output/S8h/cleaveLand_result/t_plot/PC-3p-127107_56_BGI_novel_T008904_2599_TPlot.pdf	3	90.843	2	0.536074	Output/S0h/cleaveLand_result/t_plot/PC-3p-127107_56_BGI_novel_T008904_2599_TPlot.pdf	66.6089	90.843	-0.44766	down	0.053435	0.0570321	yes	NA	NA
PC-3p-127107_56	BGI_novel_T010547	1502	1523	1514	-36.6	-24.5	0.669399	5	1-12,1523-1512;14-17,1509-1506;19-21,1504-1502	13-13,1511-1510[AILt];18-18,1505-1505[SIL]	(((.((((..((((((((((((&))))))))))))-.)))).)))	UAUAGUUCUGGAGGCUCUUAGA&UCUAAGAGCCUU-GGAACCAUA	1	33.3045	4	0.999507	Output/S8h/cleaveLand_result/t_plot/PC-3p-127107_56_BGI_novel_T010547_1514_TPlot.pdf	0	0	NA	NA	NA	33.3045	0	Inf	up	7.8779e-09	1.42259e-08	yes	GO:0009987(cellular process);GO:0015301(anion:anion antiporter activity);GO:0006839(mitochondrial transport);GO:0005623(cell);GO:0022804(active transmembrane transporter activity);GO:0031966(mitochondrial membrane);GO:0008509(anion transmembrane transporter activity);GO:0031967(organelle envelope);GO:0005743(mitochondrial inner membrane);GO:0051649(establishment of localization in cell);GO:007184…	NA
PC-3p-127107_56	BGI_novel_T011833	744	764	755	-36.6	-23.9	0.653005	10.5	5-19,760-746	1-4,764-761[UP5];20-21,745-744[UP3]	..(((((((((((((((....&....)))))))))))))))..	CCUGGUUUCAAGGCUUUGUUU&UCUAAGAGCCUUGGAACCAUA	1	33.3045	4	0.999997	Output/S8h/cleaveLand_result/t_plot/PC-3p-127107_56_BGI_novel_T011833_755_TPlot.pdf	0	0	NA	NA	NA	33.3045	0	Inf	up	7.8779e-09	1.42259e-08	yes	NA	NA
PC-3p-127107_56	XM_016077050.2	1586	1605	1597	-36.6	-25.3	0.691257	6	1-9,1605-1597;11-14,1596-1593;17-21,1590-1586	10-10,x-x[BULq];15-16,1592-1591[SIL]	(((((..((((-(((((((((&))))))))).))))..)))))	UAUGGGACCGA-GCUCUUGGA&UCUAAGAGCCUUGGAACCAUA	0	0	NA	NA	NA	4	121.124	2	0.772885	Output/S0h/cleaveLand_result/t_plot/PC-3p-127107_56_XM_016077050.2_1597_TPlot.pdf	0	121.124	-Inf	down	3.5765e-28	8.25153e-27	yes	GO:0044237(cellular metabolic process);GO:0006099(tricarboxylic acid cycle);GO:0019752(carboxylic acid metabolic process);GO:0016740(transferase activity);GO:0072350(tricarboxylic acid metabolic process);GO:0046912(transferase activity, transferring acyl groups, acyl groups converted into alkyl on transfer);GO:0071704(organic substance metabolic process);GO:0044238(primary metabolic process);GO:0…	ko01210(2-Oxocarboxylic acid metabolism);ko00020(Citrate cycle (TCA cycle));ko01200(Carbon metabolism);ko01230(Biosynthesis of amino acids);ko01110(Biosynthesis of secondary metabolites);ko01100(Metabolic pathways);ko00630(Glyoxylate and dicarboxylate metabolism)
PC-3p-127107_56	XM_016077051.2	1664	1683	1675	-36.6	-25.3	0.691257	6	1-9,1683-1675;11-14,1674-1671;17-21,1668-1664	10-10,x-x[BULq];15-16,1670-1669[SIL]	(((((..((((-(((((((((&))))))))).))))..)))))	UAUGGGACCGA-GCUCUUGGA&UCUAAGAGCCUUGGAACCAUA	1	33.3045	4	0.982806	Output/S8h/cleaveLand_result/t_plot/PC-3p-127107_56_XM_016077051.2_1675_TPlot.pdf	0	0	NA	NA	NA	33.3045	0	Inf	up	7.8779e-09	1.42259e-08	yes	GO:0044237(cellular metabolic process);GO:0006099(tricarboxylic acid cycle);GO:0019752(carboxylic acid metabolic process);GO:0016740(transferase activity);GO:0072350(tricarboxylic acid metabolic process);GO:0046912(transferase activity, transferring acyl groups, acyl groups converted into alkyl on transfer);GO:0071704(organic substance metabolic process);GO:0044238(primary metabolic process);GO:0…	ko01210(2-Oxocarboxylic acid metabolism);ko00020(Citrate cycle (TCA cycle));ko01200(Carbon metabolism);ko01230(Biosynthesis of amino acids);ko01110(Biosynthesis of secondary metabolites);ko01100(Metabolic pathways);ko00630(Glyoxylate and dicarboxylate metabolism)
PC-3p-127107_56	XM_016078484.2	1117	1137	1128	-36.6	-25.9	0.70765	7	1-3,1137-1135;6-15,1132-1123;17-21,1121-1117	4-5,1134-1133[SIL];16-16,1122-1122[SIL]	(((((.((((((((((..(((&)))..)))))))))).)))))	UGUGGAUCCAAGGCUUGAAGG&UCUAAGAGCCUUGGAACCAUA	3	99.9134	2	0.578675	Output/S8h/cleaveLand_result/t_plot/PC-3p-127107_56_XM_016078484.2_1128_TPlot.pdf	0	0	NA	NA	NA	99.9134	0	Inf	up	1.5881e-23	2.42062e-22	yes	GO:0044260(cellular macromolecule metabolic process);GO:0008152(metabolic process);GO:0016740(transferase activity);GO:0032555(purine ribonucleotide binding);GO:0016773(phosphotransferase activity, alcohol group as acceptor);GO:0038023(signaling receptor activity);GO:1901363(heterocyclic compound binding);GO:0032553(ribonucleotide binding);GO:0005488(binding);GO:0043168(anion binding);GO:0004871(…	NA
PC-3p-127107_56	XM_016079164.2	2090	2110	2101	-36.6	-25.98	0.709836	8.5	1-3,2110-2108;7-21,2104-2090	4-6,2107-2105[SIL]	(((((((((((((((...(((&)))...)))))))))))))))	UAUGGUUCUAGGGCUGAAGGA&UCUAAGAGCCUUGGAACCAUA	1	33.3045	4	0.917006	Output/S8h/cleaveLand_result/t_plot/PC-3p-127107_56_XM_016079164.2_2101_TPlot.pdf	1	30.281	4	0.926915	Output/S0h/cleaveLand_result/t_plot/PC-3p-127107_56_XM_016079164.2_2101_TPlot.pdf	33.3045	30.281	0.137303	up	0.70456	0.704918	yes	NA	ko00640(Propanoate metabolism);ko01100(Metabolic pathways);ko01110(Biosynthesis of secondary metabolites);ko01212(Fatty acid metabolism);ko00061(Fatty acid biosynthesis);ko00620(Pyruvate metabolism)
PC-3p-127107_56	XM_016085235.2	1284	1306	1295	-36.6	-23.8	0.650273	10	1-4,1306-1303;5-13,1300-1292;16-20,1289-1285	x-x,1302-1301[BULt];14-15,1291-1290[SIL];21-21,1284-1284[UP3]	.(((((..(((((((((..((((&))))--)))))))))..))))).	GAUGGUGACAGGGUUCUGAUGGA&UCUA--AGAGCCUUGGAACCAUA	1	33.3045	4	0.999999	Output/S8h/cleaveLand_result/t_plot/PC-3p-127107_56_XM_016085235.2_1295_TPlot.pdf	0	0	NA	NA	NA	33.3045	0	Inf	up	7.8779e-09	1.42259e-08	yes	NA	NA
PC-3p-127107_56	XM_016086845.2	624	643	635	-36.6	-25.2	0.688525	6.5	1-3,643-641;7-21,638-624	4-6,640-639[AILq]	(((((((((((((((..-(((&)))...)))))))))))))))	UAUGGUUUCAAGGCUGA-AGA&UCUAAGAGCCUUGGAACCAUA	1	33.3045	4	0.990918	Output/S8h/cleaveLand_result/t_plot/PC-3p-127107_56_XM_016086845.2_635_TPlot.pdf	0	0	NA	NA	NA	33.3045	0	Inf	up	7.8779e-09	1.42259e-08	yes	GO:0018108(peptidyl-tyrosine phosphorylation);GO:0006468(protein phosphorylation);GO:0006807(nitrogen compound metabolic process);GO:0071704(organic substance metabolic process);GO:1901265(nucleoside phosphate binding);GO:0005524(ATP binding);GO:0035639(purine ribonucleoside triphosphate binding);GO:0032559(adenyl ribonucleotide binding);GO:0003824(catalytic activity);GO:0006464(cellular protein …	ko04626(Plant-pathogen interaction)
PC-3p-127107_56	XM_016087059.2	1620	1641	1632	-36.6	-23.8	0.650273	9.5	1-10,1641-1632;12-18,1629-1623	11-11,1631-1630[AILt];19-21,1622-1620[UP3]	...(((((((..((((((((((&))))))))))-.)))))))...	AUGGGUUUCAUUGGCUUUUGGA&UCUAAGAGCC-UUGGAACCAUA	0	0	NA	NA	NA	1	30.281	4	1	Output/S0h/cleaveLand_result/t_plot/PC-3p-127107_56_XM_016087059.2_1632_TPlot.pdf	0	30.281	-Inf	down	3.7368e-08	4.29087e-08	yes	GO:0016021(integral component of membrane);GO:0044425(membrane part);GO:0016020(membrane);GO:0031224(intrinsic component of membrane)	ko03008(Ribosome biogenesis in eukaryotes)
PC-3p-127107_56	XM_016087079.2	666	687	677	-36.6	-26.5	0.724044	7	1-7,687-681;8-15,679-672;17-18,670-669	x-x,680-680[BULt];16-16,671-671[SIL];19-21,668-666[UP3]	...((.((((((((.(((((((&)))))))-)))))))).))...	ACAGGGUCCAAGGCUUCUUGGA&UCUAAGA-GCCUUGGAACCAUA	1	33.3045	4	0.84943	Output/S8h/cleaveLand_result/t_plot/PC-3p-127107_56_XM_016087079.2_677_TPlot.pdf	0	0	NA	NA	NA	33.3045	0	Inf	up	7.8779e-09	1.42259e-08	yes	GO:0016740(transferase activity);GO:0009987(cellular process);GO:0006644(phospholipid metabolic process);GO:0008152(metabolic process);GO:0090407(organophosphate biosynthetic process);GO:0006657(CDP-choline pathway);GO:1901576(organic substance biosynthetic process);GO:0006629(lipid metabolic process);GO:0019637(organophosphate metabolic process);GO:0003824(catalytic activity);GO:0046486(glycerol…	ko00564(Glycerophospholipid metabolism);ko01100(Metabolic pathways)
PC-3p-127107_56	XM_016092749.2	455	478	469	-36.6	-23.8	0.650273	8.5	1-7,478-472;9-13,470-466;14-20,462-456	8-8,471-471[SIL];x-x,465-463[BULt];21-21,455-455[UP3]	.(((((((...(((((.(((((((&))))))).)))))---))))))).	GGUGGUUCUGUCAAGGGUUUUGGA&UCUAAGAGCCUUG---GAACCAUA	0	0	NA	NA	NA	3	90.843	2	0.992779	Output/S0h/cleaveLand_result/t_plot/PC-3p-127107_56_XM_016092749.2_469_TPlot.pdf	0	90.843	-Inf	down	1.5521e-21	1.73737e-20	yes	GO:0032774(RNA biosynthetic process);GO:0090304(nucleic acid metabolic process);GO:1901576(organic substance biosynthetic process);GO:0034654(nucleobase-containing compound biosynthetic process);GO:0043170(macromolecule metabolic process);GO:0006139(nucleobase-containing compound metabolic process);GO:0018130(heterocycle biosynthetic process);GO:0034641(cellular nitrogen compound metabolic proces…	NA
PC-3p-127107_56	XM_016093482.2	392	418	408	-36.6	-24.6	0.672131	12	1-3,418-416;5-15,413-403;16-19,397-394	4-4,415-414[AILt];x-x,402-398[BULt];20-21,393-392[UP3]	..((((.....(((((((((((..(((&)))-.)))))))))))-----))))..	CCUGGUUCCUUUCCGAGGCUCUGAAGA&UCU-AAGAGCCUUGGA-----ACCAUA	4	133.218	2	0.909004	Output/S8h/cleaveLand_result/t_plot/PC-3p-127107_56_XM_016093482.2_408_TPlot.pdf	1	30.281	4	0.999376	Output/S0h/cleaveLand_result/t_plot/PC-3p-127107_56_XM_016093482.2_408_TPlot.pdf	133.218	30.281	2.1373	up	8.2351e-16	4.96794e-15	yes	GO:0008152(metabolic process);GO:0003954(NADH dehydrogenase activity);GO:0016491(oxidoreductase activity);GO:0003824(catalytic activity);GO:0050136(NADH dehydrogenase (quinone) activity);GO:0008137(NADH dehydrogenase (ubiquinone) activity);GO:0016655(oxidoreductase activity, acting on NAD(P)H, quinone or similar compound as acceptor);GO:0016651(oxidoreductase activity, acting on NAD(P)H);GO:00551…	ko01100(Metabolic pathways);ko00190(Oxidative phosphorylation)
PC-3p-127107_56	XM_016094611.2	723	745	734	-36.6	-24.48	0.668852	10	1-5,745-741;8-20,736-724	6-7,740-737[AILt];21-21,723-723[UP3]	.(((((((((((((....(((((&)))))--..))))))))))))).	AGUGGUUUCAAGGCACGAUUAGA&UCUAA--GAGCCUUGGAACCAUA	1	33.3045	4	0.999618	Output/S8h/cleaveLand_result/t_plot/PC-3p-127107_56_XM_016094611.2_734_TPlot.pdf	0	0	NA	NA	NA	33.3045	0	Inf	up	7.8779e-09	1.42259e-08	yes	GO:0046872(metal ion binding);GO:0016021(integral component of membrane);GO:0005506(iron ion binding);GO:0044425(membrane part);GO:0046914(transition metal ion binding);GO:0046906(tetrapyrrole binding);GO:0043167(ion binding);GO:0005488(binding);GO:0004497(monooxygenase activity);GO:0003824(catalytic activity);GO:0016705(oxidoreductase activity, acting on paired donors, with incorporation or redu…	ko00590(Arachidonic acid metabolism);ko01100(Metabolic pathways);ko00591(Linoleic acid metabolism)
PC-3p-127107_56	XM_016097946.2	1253	1274	1264	-36.6	-24.2	0.661202	9	1-4,1274-1271;7-9,1268-1266;10-18,1264-1256	5-6,1270-1269[SIL];x-x,1265-1265[BULt];19-21,1255-1253[UP3]	...(((((((((.(((..((((&))))..)))-)))))))))...	GCAGGUUCCAAGUGCUAGUAGA&UCUAAGAGC-CUUGGAACCAUA	0	0	NA	NA	NA	1	30.281	4	0.999962	Output/S0h/cleaveLand_result/t_plot/PC-3p-127107_56_XM_016097946.2_1264_TPlot.pdf	0	30.281	-Inf	down	3.7368e-08	4.29087e-08	yes	GO:0009396(folic acid-containing compound biosynthetic process);GO:0044249(cellular biosynthetic process);GO:0046394(carboxylic acid biosynthetic process);GO:0019752(carboxylic acid metabolic process);GO:0018130(heterocycle biosynthetic process);GO:0006575(cellular modified amino acid metabolic process);GO:0051186(cofactor metabolic process);GO:0043603(cellular amide metabolic process);GO:0051188…	ko00790(Folate biosynthesis)
PC-3p-127107_56	XM_016100158.2	1823	1845	1834	-36.6	-29.4	0.803279	7	1-9,1845-1837;10-19,1834-1825	x-x,1836-1835[BULt];20-21,1824-1823[UP3]	..((((((((((..(((((((((&)))))))))--))))))))))..	CCUGGUUCCAAGAAGCUCUUGGA&UCUAAGAGC--CUUGGAACCAUA	1	33.3045	4	0.138356	Output/S8h/cleaveLand_result/t_plot/PC-3p-127107_56_XM_016100158.2_1834_TPlot.pdf	0	0	NA	NA	NA	33.3045	0	Inf	up	7.8779e-09	1.42259e-08	yes	NA	NA
PC-3p-127107_56	XM_016102639.1	966	991	982	-36.6	-25.5	0.696721	14	1-11,991-981;12-17,976-971;18-19,969-968	x-x,980-977[BULt];x-x,970-970[BULt];20-21,967-966[UP3]	..((.((((((....(((((((((((&)))))))))))----))))))-))..	CUUGUGUUCCGGCGGGGGCUCUUGGA&UCUAAGAGCCU----UGGAAC-CAUA	2	66.6089	3	0.293167	Output/S8h/cleaveLand_result/t_plot/PC-3p-127107_56_XM_016102639.1_982_TPlot.pdf	0	0	NA	NA	NA	66.6089	0	Inf	up	3.3071e-16	2.0359e-15	yes	NA	ko04016(MAPK signaling pathway - plant);ko04626(Plant-pathogen interaction)
PC-3p-127107_56	XM_016103236.2	670	690	681	-36.6	-24.4	0.666667	15	8-20,683-671	1-7,690-684[UP5];21-21,670-670[UP3]	.(((((((((((((.......&.......))))))))))))).	CAUGGUUCCGAGGCGGAUCCG&UCUAAGAGCCUUGGAACCAUA	0	0	NA	NA	NA	1	30.281	4	0.999864	Output/S0h/cleaveLand_result/t_plot/PC-3p-127107_56_XM_016103236.2_681_TPlot.pdf	0	30.281	-Inf	down	3.7368e-08	4.29087e-08	yes	NA	NA
PC-3p-127107_56	XM_016104137.2	545	566	556	-36.6	-24.3	0.663934	7	1-7,566-560;9-9,558-558;10-18,556-548	8-8,559-559[SIL];x-x,557-557[BULt];19-21,547-545[UP3]	...(((((((((.(.(((((((&))))))).)-)))))))))...	CAGGGUUCCAAGAGAUCUUAGA&UCUAAGAGC-CUUGGAACCAUA	6	199.827	3	0.592622	Output/S8h/cleaveLand_result/t_plot/PC-3p-127107_56_XM_016104137.2_556_TPlot.pdf	18	545.058	3	0.618633	Output/S0h/cleaveLand_result/t_plot/PC-3p-127107_56_XM_016104137.2_556_TPlot.pdf	199.827	545.058	-1.44766	down	1.0958e-36	5.18445e-35	yes	GO:0050896(response to stimulus)	NA
PC-3p-127107_56	XM_016104195.2	386	408	397	-36.6	-27.4	0.748634	6	2-3,407-406;4-8,404-400;9-20,398-387	1-1,408-408[UP5];x-x,405-405[BULt];x-x,399-399[BULt];21-21,386-386[UP3]	.((((((((((((.(((((.((.&.))-)))))-)))))))))))).	GAUGGUUCCAAGGCCUCUUCAGC&UCU-AAGAG-CCUUGGAACCAUA	0	0	NA	NA	NA	1	30.281	4	0.726619	Output/S0h/cleaveLand_result/t_plot/PC-3p-127107_56_XM_016104195.2_397_TPlot.pdf	0	30.281	-Inf	down	3.7368e-08	4.29087e-08	yes	GO:0050896(response to stimulus)	NA
PC-3p-127107_56	XM_016105533.2	2006	2027	2017	-36.6	-24.3	0.663934	13	5-8,2023-2020;9-18,2018-2009	1-4,2027-2024[UP5];x-x,2019-2019[BULt];19-21,2008-2006[UP3]	...((((((((((.((((....&....))))-))))))))))...	UGGGGUUCCAGGGUCUCUGCAG&UCUAAGAG-CCUUGGAACCAUA	2	66.6089	2	0.950564	Output/S8h/cleaveLand_result/t_plot/PC-3p-127107_56_XM_016105533.2_2017_TPlot.pdf	0	0	NA	NA	NA	66.6089	0	Inf	up	3.3071e-16	2.0359e-15	yes	GO:0043167(ion binding);GO:0097159(organic cyclic compound binding);GO:1901681(sulfur compound binding);GO:0046872(metal ion binding);GO:0016831(carboxy-lyase activity);GO:0016830(carbon-carbon lyase activity);GO:0043168(anion binding);GO:0000287(magnesium ion binding);GO:0019842(vitamin binding);GO:0050662(coenzyme binding);GO:0003824(catalytic activity);GO:0043169(cation binding);GO:0036094(sma…	ko01110(Biosynthesis of secondary metabolites);ko00010(Glycolysis / Gluconeogenesis);ko01100(Metabolic pathways)
PC-3p-127107_56	XM_016107944.2	852	874	863	-36.6	-24	0.655738	8	1-2,874-873;4-9,871-866;10-20,863-853	3-3,872-872[SIL];x-x,865-864[BULt];21-21,852-852[UP3]	.(((((((((((..((((((.((&)).))))))--))))))))))).	CGUGGUUCUAAGUAGCUCUUUGA&UCUAAGAGC--CUUGGAACCAUA	0	0	NA	NA	NA	1	30.281	4	0.999995	Output/S0h/cleaveLand_result/t_plot/PC-3p-127107_56_XM_016107944.2_863_TPlot.pdf	0	30.281	-Inf	down	3.7368e-08	4.29087e-08	yes	GO:0003824(catalytic activity);GO:0016787(hydrolase activity)	NA
PC-3p-127107_56	XM_016111551.2	801	830	820	-36.6	-25.7	0.702186	22.5	1-4,830-827;6-11,824-819;12-21,810-801	5-5,826-825[AILt];x-x,818-811[BULt]	((((((((((........((((((..((((&))))-.))))))--------))))))))))	UGUGGUUCCAGAACCGCAGGGCUCGGUGGA&UCUA-AGAGCCU--------UGGAACCAUA	2	66.6089	3	0.256166	Output/S8h/cleaveLand_result/t_plot/PC-3p-127107_56_XM_016111551.2_820_TPlot.pdf	0	0	NA	NA	NA	66.6089	0	Inf	up	3.3071e-16	2.0359e-15	yes	GO:0097159(organic cyclic compound binding);GO:0003676(nucleic acid binding);GO:1901363(heterocyclic compound binding);GO:0005488(binding);GO:0003677(DNA binding)	NA
PC-3p-127107_56	XM_016112192.2	474	494	485	-36.6	-25.1	0.685792	14	8-20,487-475	1-7,494-488[UP5];21-21,474-474[UP3]	.(((((((((((((.......&.......))))))))))))).	GAUGGUUCCAAGGCAACAGGU&UCUAAGAGCCUUGGAACCAUA	1	33.3045	4	0.993807	Output/S8h/cleaveLand_result/t_plot/PC-3p-127107_56_XM_016112192.2_485_TPlot.pdf	1	30.281	4	0.995224	Output/S0h/cleaveLand_result/t_plot/PC-3p-127107_56_XM_016112192.2_485_TPlot.pdf	33.3045	30.281	0.137303	up	0.70456	0.704918	yes	GO:0016051(carbohydrate biosynthetic process);GO:1901576(organic substance biosynthetic process);GO:0044042(glucan metabolic process);GO:0008152(metabolic process);GO:0044422(organelle part);GO:0043170(macromolecule metabolic process);GO:0016868(intramolecular transferase activity, phosphotransferases);GO:0005622(intracellular);GO:0009629(response to gravity);GO:0009590(detection of gravity);GO:0…	ko00500(Starch and sucrose metabolism);ko00230(Purine metabolism);ko00010(Glycolysis / Gluconeogenesis);ko01100(Metabolic pathways);ko01110(Biosynthesis of secondary metabolites);ko00030(Pentose phosphate pathway);ko00520(Amino sugar and nucleotide sugar metabolism);ko00052(Galactose metabolism)
PC-3p-127107_56	XM_016112487.2	808	828	820	-36.6	-23.9	0.653005	5.5	1-4,828-825;6-15,824-815;16-21,813-808	5-5,x-x[BULq];x-x,814-814[BULt]	((((((.((((((((((-((((&)))).))))))))))-))))))	UAUGGUGUUCAAGGUUC-UGGA&UCUAAGAGCCUUGGA-ACCAUA	1	33.3045	4	0.999996	Output/S8h/cleaveLand_result/t_plot/PC-3p-127107_56_XM_016112487.2_820_TPlot.pdf	0	0	NA	NA	NA	33.3045	0	Inf	up	7.8779e-09	1.42259e-08	yes	GO:0043226(organelle);GO:1901360(organic cyclic compound metabolic process);GO:0043170(macromolecule metabolic process);GO:0036094(small molecule binding);GO:0097159(organic cyclic compound binding);GO:0005488(binding);GO:0050794(regulation of cellular process);GO:0016070(RNA metabolic process);GO:0044238(primary metabolic process);GO:1901363(heterocyclic compound binding);GO:0044260(cellular mac…	NA
PC-3p-127107_56	XM_016112488.2	808	828	820	-36.6	-23.9	0.653005	5.5	1-4,828-825;6-15,824-815;16-21,813-808	5-5,x-x[BULq];x-x,814-814[BULt]	((((((.((((((((((-((((&)))).))))))))))-))))))	UAUGGUGUUCAAGGUUC-UGGA&UCUAAGAGCCUUGGA-ACCAUA	0	0	NA	NA	NA	1	30.281	4	0.999998	Output/S0h/cleaveLand_result/t_plot/PC-3p-127107_56_XM_016112488.2_820_TPlot.pdf	0	30.281	-Inf	down	3.7368e-08	4.29087e-08	yes	GO:0043226(organelle);GO:1901360(organic cyclic compound metabolic process);GO:0043170(macromolecule metabolic process);GO:0036094(small molecule binding);GO:0097159(organic cyclic compound binding);GO:0005488(binding);GO:0050794(regulation of cellular process);GO:0016070(RNA metabolic process);GO:0044238(primary metabolic process);GO:1901363(heterocyclic compound binding);GO:0044260(cellular mac…	NA
PC-3p-127107_56	XM_016113026.2	1355	1376	1366	-36.6	-24.2	0.661202	7	1-8,1376-1369;9-16,1367-1360	x-x,1368-1368[BULt];17-21,1359-1355[UP3]	.....((((((((.((((((((&))))))))-)))))))).....	AGCUAUUCCAAGGACUCUUAGA&UCUAAGAG-CCUUGGAACCAUA	0	0	NA	NA	NA	1	30.281	4	0.999976	Output/S0h/cleaveLand_result/t_plot/PC-3p-127107_56_XM_016113026.2_1366_TPlot.pdf	0	30.281	-Inf	down	3.7368e-08	4.29087e-08	yes	GO:0016070(RNA metabolic process);GO:0009451(RNA modification);GO:0071704(organic substance metabolic process);GO:0005623(cell);GO:0003723(RNA binding);GO:0046483(heterocycle metabolic process);GO:0043231(intracellular membrane-bounded organelle);GO:0001522(pseudouridine synthesis);GO:0097159(organic cyclic compound binding);GO:0006139(nucleobase-containing compound metabolic process);GO:0043229(…	NA
PC-3p-127107_56	XM_016114373.2	1813	1837	1827	-36.6	-24	0.655738	10.5	2-5,1836-1833;7-15,1830-1822;16-21,1818-1813	1-1,1837-1837[UP5];6-6,1832-1831[AILt];x-x,1821-1819[BULt]	((((((...(((((((((..((((.&.))))-.)))))))))---))))))	UGUGGUUAAUCCAGGGCUGGUUGGG&UCUAA-GAGCCUUGGA---ACCAUA	2	66.6089	2	0.981457	Output/S8h/cleaveLand_result/t_plot/PC-3p-127107_56_XM_016114373.2_1827_TPlot.pdf	0	0	NA	NA	NA	66.6089	0	Inf	up	3.3071e-16	2.0359e-15	yes	NA	ko03015(mRNA surveillance pathway)
PC-3p-127107_56	XM_016114429.2	175	196	187	-36.6	-24.3	0.663934	8	1-3,196-194;6-9,192-189;10-10,187-187;11-21,185-175	4-5,193-193[AILq];x-x,188-188[BULt];x-x,186-186[BULt]	(((((((((((.(.((((.-(((&)))..))))-)-)))))))))))	UAUGGUUCCAACGAGCUCG-AGA&UCUAAGAGC-C-UUGGAACCAUA	0	0	NA	NA	NA	1	30.281	4	0.999948	Output/S0h/cleaveLand_result/t_plot/PC-3p-127107_56_XM_016114429.2_187_TPlot.pdf	0	30.281	-Inf	down	3.7368e-08	4.29087e-08	yes	GO:0005524(ATP binding);GO:0032553(ribonucleotide binding);GO:0043167(ion binding);GO:1901265(nucleoside phosphate binding);GO:0000166(nucleotide binding);GO:0043169(cation binding);GO:0003824(catalytic activity);GO:0043168(anion binding);GO:0016787(hydrolase activity);GO:0016020(membrane);GO:0035639(purine ribonucleoside triphosphate binding);GO:0032559(adenyl ribonucleotide binding);GO:0031224(…	NA
PC-3p-127107_56	XM_016116888.2	2437	2460	2448	-36.6	-26.3	0.718579	11	1-3,2460-2458;4-6,2453-2451;8-20,2450-2438	x-x,2457-2454[BULt];7-7,x-x[BULq];21-21,2437-2437[UP3]	.(((((((((((((-(((....(((&)))----))).))))))))))))).	GAUGGUUCCAAGGC-CUUCCCAAGA&UCU----AAGAGCCUUGGAACCAUA	1	33.3045	4	0.888212	Output/S8h/cleaveLand_result/t_plot/PC-3p-127107_56_XM_016116888.2_2448_TPlot.pdf	2	60.562	2	0.546641	Output/S0h/cleaveLand_result/t_plot/PC-3p-127107_56_XM_016116888.2_2448_TPlot.pdf	33.3045	60.562	-0.862697	down	0.0049011	0.0052713	yes	NA	NA
PC-3p-127107_56	XM_021125442.1	590	612	602	-36.6	-24.6	0.672131	8	1-2,612-611;3-16,609-596;17-18,594-593	x-x,610-610[BULt];x-x,595-595[BULt];19-21,592-590[UP3]	...((.((((((((((((((.((&))-))))))))))))))-))...	UAAGGUUUCCAAGGUUCUUGUGA&UC-UAAGAGCCUUGGAA-CCAUA	0	0	NA	NA	NA	1	30.281	4	0.999478	Output/S0h/cleaveLand_result/t_plot/PC-3p-127107_56_XM_021125442.1_602_TPlot.pdf	0	30.281	-Inf	down	3.7368e-08	4.29087e-08	yes	GO:0006351(transcription, DNA-templated);GO:0071704(organic substance metabolic process);GO:0009058(biosynthetic process);GO:0043226(organelle);GO:0034654(nucleobase-containing compound biosynthetic process);GO:0032774(RNA biosynthetic process);GO:0003700(DNA binding transcription factor activity);GO:0043229(intracellular organelle);GO:0006725(cellular aromatic compound metabolic process);GO:0009…	ko04626(Plant-pathogen interaction);ko04016(MAPK signaling pathway - plant)
PC-3p-127107_56	XM_021139693.1	1856	1876	1867	-36.6	-26	0.710383	8.5	1-3,1876-1874;6-15,1871-1862;17-20,1860-1857	4-5,1873-1872[SIL];16-16,1861-1861[SIL];21-21,1856-1856[UP3]	.((((.((((((((((..(((&)))..)))))))))).)))).	AGUGGAUCCAAGGCUUGGGGA&UCUAAGAGCCUUGGAACCAUA	1	33.3045	4	0.915221	Output/S8h/cleaveLand_result/t_plot/PC-3p-127107_56_XM_021139693.1_1867_TPlot.pdf	0	0	NA	NA	NA	33.3045	0	Inf	up	7.8779e-09	1.42259e-08	yes	GO:0006464(cellular protein modification process);GO:0016740(transferase activity);GO:0035639(purine ribonucleoside triphosphate binding);GO:1901564(organonitrogen compound metabolic process);GO:0043412(macromolecule modification);GO:0016020(membrane);GO:0032553(ribonucleotide binding);GO:1901363(heterocyclic compound binding);GO:0008152(metabolic process);GO:0016773(phosphotransferase activity, …	ko04626(Plant-pathogen interaction)
PC-3p-12725_949	BGI_novel_T000598	585	611	597	-39.4	-25.7	0.652284	16	3-7,609-605;8-19,599-588;20-21,586-585	1-2,611-610[UP5];x-x,604-600[BULt];x-x,587-587[BULt]	((.((((((((((((.....(((((..&..)))))-----))))))))))))-))	GACGAGAUCAAGUUGGUCUAGCGGGUC&UUCCCGU-----CGACUUGAUCUC-UC	0	0	NA	NA	NA	1	30.281	4	0.999948	Output/S0h/cleaveLand_result/t_plot/PC-3p-12725_949_BGI_novel_T000598_597_TPlot.pdf	0	30.281	-Inf	down	3.7368e-08	4.29087e-08	yes	GO:1901363(heterocyclic compound binding);GO:0005488(binding);GO:0097159(organic cyclic compound binding);GO:0003677(DNA binding);GO:0003676(nucleic acid binding)	ko04144(Endocytosis)
PC-3p-12725_949	BGI_novel_T000599	484	510	496	-39.4	-25.7	0.652284	16	3-7,508-504;8-19,498-487;20-21,485-484	1-2,510-509[UP5];x-x,503-499[BULt];x-x,486-486[BULt]	((.((((((((((((.....(((((..&..)))))-----))))))))))))-))	GACGAGAUCAAGUUGGUCUAGCGGGUC&UUCCCGU-----CGACUUGAUCUC-UC	0	0	NA	NA	NA	1	30.281	4	0.999958	Output/S0h/cleaveLand_result/t_plot/PC-3p-12725_949_BGI_novel_T000599_496_TPlot.pdf	0	30.281	-Inf	down	3.7368e-08	4.29087e-08	yes	GO:1901363(heterocyclic compound binding);GO:0005488(binding);GO:0097159(organic cyclic compound binding);GO:0003677(DNA binding);GO:0003676(nucleic acid binding)	ko04144(Endocytosis)
PC-3p-12725_949	BGI_novel_T006646	1059	1082	1071	-39.4	-25.7	0.652284	10.5	2-6,1081-1077;7-14,1074-1067;15-21,1065-1059	1-1,1082-1082[UP5];x-x,1076-1075[BULt];x-x,1066-1066[BULt]	(((((((.((((((((..(((((.&.)))))--))))))))-)))))))	GAGAGGUGCAGGUUGAAAUGGGGG&UUCCCG--UCGACUUG-AUCUCUC	1	33.3045	4	0.999955	Output/S8h/cleaveLand_result/t_plot/PC-3p-12725_949_BGI_novel_T006646_1071_TPlot.pdf	0	0	NA	NA	NA	33.3045	0	Inf	up	7.8779e-09	1.42259e-08	yes	GO:0003677(DNA binding);GO:0097159(organic cyclic compound binding);GO:0005488(binding);GO:0003676(nucleic acid binding);GO:0046983(protein dimerization activity);GO:1901363(heterocyclic compound binding);GO:0005515(protein binding)	ko01100(Metabolic pathways);ko00510(N-Glycan biosynthesis);ko02010(ABC transporters);ko03050(Proteasome);ko04141(Protein processing in endoplasmic reticulum)
PC-3p-12725_949	XM_016078066.2	984	1004	995	-39.4	-26.2	0.664975	8	2-4,1003-1001;5-8,999-996;10-21,995-984	1-1,1004-1004[UP5];x-x,1000-1000[BULt];9-9,x-x[BULq]	((((((((((((-((((.(((.&.)))-)))).))))))))))))	GAGGGGUCAGGU-GAUGAGGAC&UUCC-CGUCGACUUGAUCUCUC	2	66.6089	3	0.474233	Output/S8h/cleaveLand_result/t_plot/PC-3p-12725_949_XM_016078066.2_995_TPlot.pdf	0	0	NA	NA	NA	66.6089	0	Inf	up	3.3071e-16	2.0359e-15	yes	GO:0043168(anion binding);GO:0046872(metal ion binding);GO:0044434(chloroplast part);GO:0097367(carbohydrate derivative binding);GO:0009408(response to heat);GO:0043227(membrane-bounded organelle);GO:0009628(response to abiotic stimulus);GO:0031975(envelope);GO:0005488(binding);GO:0017076(purine nucleotide binding);GO:0005515(protein binding);GO:0031072(heat shock protein binding);GO:0005524(ATP …	NA
PC-3p-12725_949	XM_016078894.2	1119	1140	1131	-39.4	-27	0.685279	10.5	4-11,1137-1130;13-21,1127-1119	1-3,1140-1138[UP5];12-12,1129-1128[AILt]	(((((((((..((((((((...&...))))))))-.)))))))))	GGGAGGUCGCCGUCGACGGUGC&UUCCCGUCGAC-UUGAUCUCUC	1	33.3045	4	0.971351	Output/S8h/cleaveLand_result/t_plot/PC-3p-12725_949_XM_016078894.2_1131_TPlot.pdf	0	0	NA	NA	NA	33.3045	0	Inf	up	7.8779e-09	1.42259e-08	yes	NA	ko00940(Phenylpropanoid biosynthesis);ko00500(Starch and sucrose metabolism);ko01110(Biosynthesis of secondary metabolites);ko01100(Metabolic pathways);ko00460(Cyanoamino acid metabolism)
PC-3p-12725_949	XM_016080561.2	1790	1808	1799	-39.4	-26.5	0.672589	5	1-12,1808-1797;15-20,1796-1791	13-14,x-x[BULq];21-21,1790-1790[UP3]	.((((((--((((((((((((&))))))))))))..)))))).	UAGAGAU--GGUCGAUGGGAA&UUCCCGUCGACUUGAUCUCUC	1	33.3045	4	0.996513	Output/S8h/cleaveLand_result/t_plot/PC-3p-12725_949_XM_016080561.2_1799_TPlot.pdf	0	0	NA	NA	NA	33.3045	0	Inf	up	7.8779e-09	1.42259e-08	yes	GO:0043170(macromolecule metabolic process);GO:0010033(response to organic substance);GO:0071367(cellular response to brassinosteroid stimulus);GO:0009741(response to brassinosteroid);GO:0016311(dephosphorylation);GO:0071407(cellular response to organic cyclic compound);GO:1901564(organonitrogen compound metabolic process);GO:0006807(nitrogen compound metabolic process);GO:0043412(macromolecule m…	NA
PC-3p-12725_949	XM_016092592.2	1066	1087	1078	-39.4	-26	0.659898	9.5	2-11,1086-1077;14-19,1073-1068	1-1,1087-1087[UP5];12-13,1076-1074[AILt];20-21,1067-1066[UP3]	..((((((...((((((((((.&.))))))))))-..))))))..	CCGGGAUCCAUGUCGAUGGGAU&UUCCCGUCGAC-UUGAUCUCUC	2	66.6089	2	0.936254	Output/S8h/cleaveLand_result/t_plot/PC-3p-12725_949_XM_016092592.2_1078_TPlot.pdf	0	0	NA	NA	NA	66.6089	0	Inf	up	3.3071e-16	2.0359e-15	yes	GO:0032787(monocarboxylic acid metabolic process);GO:0044422(organelle part);GO:0008152(metabolic process);GO:0006090(pyruvate metabolic process);GO:0009532(plastid stroma);GO:0043226(organelle);GO:0044237(cellular metabolic process);GO:0006732(coenzyme metabolic process);GO:0006082(organic acid metabolic process);GO:0009526(plastid envelope);GO:0055114(oxidation-reduction process);GO:0035384(thi…	ko00010(Glycolysis / Gluconeogenesis);ko01110(Biosynthesis of secondary metabolites);ko00620(Pyruvate metabolism);ko00020(Citrate cycle (TCA cycle));ko01100(Metabolic pathways);ko01200(Carbon metabolism)
PC-3p-12725_949	XM_016093893.2	1133	1155	1145	-39.4	-27.1	0.687817	7.5	2-6,1154-1150;8-8,1148-1148;9-12,1146-1143;13-21,1141-1133	1-1,1155-1155[UP5];7-7,1149-1149[SIL];x-x,1147-1147[BULt];x-x,1142-1142[BULt]	(((((((((.((((.(.(((((.&.))))).)-))))-)))))))))	GAGAGGUCAGAGUCUGCCGGGAG&UUCCCGUC-GACU-UGAUCUCUC	0	0	NA	NA	NA	1	30.281	4	0.945351	Output/S0h/cleaveLand_result/t_plot/PC-3p-12725_949_XM_016093893.2_1145_TPlot.pdf	0	30.281	-Inf	down	3.7368e-08	4.29087e-08	yes	GO:0043170(macromolecule metabolic process);GO:0003824(catalytic activity);GO:0035639(purine ribonucleoside triphosphate binding);GO:0006464(cellular protein modification process);GO:0043167(ion binding);GO:0065007(biological regulation);GO:0036094(small molecule binding);GO:0004672(protein kinase activity);GO:0023052(signaling);GO:0051716(cellular response to stimulus);GO:0005524(ATP binding);GO…	NA
PC-3p-12725_949	XM_016094772.2	692	711	703	-39.4	-28.3	0.718274	6	3-8,709-704;10-20,703-693	1-2,711-710[UP5];9-9,x-x[BULq];21-21,692-692[UP3]	.(((((((((((-((((((..&..)))))).))))))))))).	AAGAGAUCAAGU-GACGGGCA&UUCCCGUCGACUUGAUCUCUC	0	0	NA	NA	NA	1	30.281	4	0.488703	Output/S0h/cleaveLand_result/t_plot/PC-3p-12725_949_XM_016094772.2_703_TPlot.pdf	0	30.281	-Inf	down	3.7368e-08	4.29087e-08	yes	GO:0031326(regulation of cellular biosynthetic process);GO:0031323(regulation of cellular metabolic process);GO:0051252(regulation of RNA metabolic process);GO:0043169(cation binding);GO:1903506(regulation of nucleic acid-templated transcription);GO:0006355(regulation of transcription, DNA-templated);GO:0050789(regulation of biological process);GO:0043167(ion binding);GO:0010468(regulation of gen…	NA
PC-3p-12725_949	XM_016096771.2	1252	1273	1264	-39.4	-27.9	0.708122	6	1-13,1273-1261;15-17,1259-1257;18-21,1255-1252	14-14,1260-1260[SIL];x-x,1256-1256[BULt]	((((.(((.(((((((((((((&))))))))))))).)))-))))	GGGAUGAUGGGGUUGAUGGGAA&UUCCCGUCGACUUGAUC-UCUC	2	66.6089	2	0.319525	Output/S8h/cleaveLand_result/t_plot/PC-3p-12725_949_XM_016096771.2_1264_TPlot.pdf	1	30.281	4	0.694281	Output/S0h/cleaveLand_result/t_plot/PC-3p-12725_949_XM_016096771.2_1264_TPlot.pdf	66.6089	30.281	1.1373	up	0.00022361	0.000246722	yes	GO:0044260(cellular macromolecule metabolic process);GO:0006470(protein dephosphorylation);GO:1901564(organonitrogen compound metabolic process);GO:0006807(nitrogen compound metabolic process);GO:0008152(metabolic process);GO:0006796(phosphate-containing compound metabolic process);GO:0016787(hydrolase activity);GO:0009987(cellular process);GO:0044237(cellular metabolic process);GO:0044238(primar…	NA
PC-3p-12725_949	XM_016097625.2	1028	1049	1041	-39.4	-29.3	0.743655	6	1-9,1049-1041;11-18,1040-1033;19-21,1030-1028	10-10,x-x[BULq];x-x,1032-1031[BULt]	(((..((((((((-(((((((((&))))))))).))))))))--)))	GAGGUGGAUCAAG-CGGCGGGAG&UUCCCGUCGACUUGAUCU--CUC	0	0	NA	NA	NA	1	30.281	4	0.300761	Output/S0h/cleaveLand_result/t_plot/PC-3p-12725_949_XM_016097625.2_1041_TPlot.pdf	0	30.281	-Inf	down	3.7368e-08	4.29087e-08	yes	GO:0097159(organic cyclic compound binding);GO:0003676(nucleic acid binding);GO:0003723(RNA binding);GO:0005488(binding);GO:0036094(small molecule binding);GO:1901363(heterocyclic compound binding);GO:0000166(nucleotide binding);GO:1901265(nucleoside phosphate binding)	ko03040(Spliceosome)
PC-3p-12725_949	XM_016097651.2	301	321	312	-39.4	-26.7	0.677665	8.5	2-8,320-314;11-20,311-302	1-1,321-321[UP5];9-10,313-312[SIL];21-21,301-301[UP3]	.((((((((((..(((((((.&.)))))))..)))))))))).	UGGGGGUCAAGAAGAUGGGAU&UUCCCGUCGACUUGAUCUCUC	0	0	NA	NA	NA	1	30.281	4	0.993169	Output/S0h/cleaveLand_result/t_plot/PC-3p-12725_949_XM_016097651.2_312_TPlot.pdf	0	30.281	-Inf	down	3.7368e-08	4.29087e-08	yes	GO:0003824(catalytic activity);GO:0042578(phosphoric ester hydrolase activity);GO:0016788(hydrolase activity, acting on ester bonds);GO:0016787(hydrolase activity)	ko03440(Homologous recombination);ko04712(Circadian rhythm - plant);ko03010(Ribosome)
PC-3p-12725_949	XM_016098671.2	134	158	149	-39.4	-27.3	0.692893	9	1-5,158-154;7-11,152-148;12-15,145-142;16-21,139-134	6-6,153-153[SIL];x-x,147-146[BULt];x-x,141-140[BULt]	((((((..((((..(((((.(((((&))))).)))))--))))--))))))	GAGAGAAAUCAGAUGUCGAGGGGAA&UUCCCGUCGAC--UUGA--UCUCUC	0	0	NA	NA	NA	2	60.562	2	0.563721	Output/S0h/cleaveLand_result/t_plot/PC-3p-12725_949_XM_016098671.2_149_TPlot.pdf	0	60.562	-Inf	down	7.123e-15	2.99612e-14	yes	GO:0016021(integral component of membrane);GO:0031224(intrinsic component of membrane);GO:0044425(membrane part);GO:0016020(membrane)	NA
PC-3p-12725_949	XM_016100475.2	589	610	601	-39.4	-27.6	0.700508	7.5	1-8,610-603;10-12,601-599;13-20,597-590	9-9,602-602[SIL];x-x,598-598[BULt];21-21,589-589[UP3]	.((((((((.(((.((((((((&)))))))).)))-)))))))).	UAGAGGUCACAGUGGAUGGGGA&UUCCCGUCGACU-UGAUCUCUC	0	0	NA	NA	NA	4	121.124	2	0.495177	Output/S0h/cleaveLand_result/t_plot/PC-3p-12725_949_XM_016100475.2_601_TPlot.pdf	0	121.124	-Inf	down	3.5765e-28	8.25153e-27	yes	GO:0044042(glucan metabolic process);GO:0008270(zinc ion binding);GO:0016740(transferase activity);GO:0033692(cellular polysaccharide biosynthetic process);GO:0071554(cell wall organization or biogenesis);GO:0043170(macromolecule metabolic process);GO:0000271(polysaccharide biosynthetic process);GO:0046914(transition metal ion binding);GO:0044464(cell part);GO:0031224(intrinsic component of membr…	NA
PC-3p-12725_949	XM_016100476.1	137	158	149	-39.4	-27.6	0.700508	7.5	1-8,158-151;10-12,149-147;13-20,145-138	9-9,150-150[SIL];x-x,146-146[BULt];21-21,137-137[UP3]	.((((((((.(((.((((((((&)))))))).)))-)))))))).	UAGAGGUCACAGUGGAUGGGGA&UUCCCGUCGACU-UGAUCUCUC	0	0	NA	NA	NA	1	30.281	4	0.866334	Output/S0h/cleaveLand_result/t_plot/PC-3p-12725_949_XM_016100476.1_149_TPlot.pdf	0	30.281	-Inf	down	3.7368e-08	4.29087e-08	yes	GO:0044042(glucan metabolic process);GO:0008270(zinc ion binding);GO:0016740(transferase activity);GO:0033692(cellular polysaccharide biosynthetic process);GO:0071554(cell wall organization or biogenesis);GO:0043170(macromolecule metabolic process);GO:0000271(polysaccharide biosynthetic process);GO:0046914(transition metal ion binding);GO:0044464(cell part);GO:0031224(intrinsic component of membr…	NA
PC-3p-12725_949	XM_016103754.2	815	835	826	-39.4	-26.8	0.680203	5.5	1-10,835-826;12-19,825-818;20-21,816-815	11-11,x-x[BULq];x-x,817-817[BULt]	((.((((((((-((((((((((&)))))))))).))))))))-))	GAUGAGGUCGA-UUGACGGGAG&UUCCCGUCGACUUGAUCUC-UC	0	0	NA	NA	NA	1	30.281	4	0.989076	Output/S0h/cleaveLand_result/t_plot/PC-3p-12725_949_XM_016103754.2_826_TPlot.pdf	0	30.281	-Inf	down	3.7368e-08	4.29087e-08	yes	NA	NA
PC-3p-12725_949	XM_016108390.2	1230	1248	1241	-39.4	-27.1	0.687817	8.5	3-6,1246-1243;8-9,1242-1241;11-21,1240-1230	1-2,1248-1247[UP5];7-7,x-x[BULq];10-10,x-x[BULq]	(((((((((((-((-((((..&..)))).)).)))))))))))	GAGAGGUCAGG-CG-CGGGCA&UUCCCGUCGACUUGAUCUCUC	0	0	NA	NA	NA	1	30.281	4	0.946559	Output/S0h/cleaveLand_result/t_plot/PC-3p-12725_949_XM_016108390.2_1241_TPlot.pdf	0	30.281	-Inf	down	3.7368e-08	4.29087e-08	yes	GO:0048471(perinuclear region of cytoplasm);GO:0009816(defense response to bacterium, incompatible interaction);GO:0031348(negative regulation of defense response);GO:0065007(biological regulation);GO:0043227(membrane-bounded organelle);GO:0009605(response to external stimulus);GO:0043207(response to external biotic stimulus);GO:0045087(innate immune response);GO:0048519(negative regulation of bi…	ko00514(Other types of O-glycan biosynthesis)
PC-3p-12725_949	XM_016112267.2	1112	1134	1124	-39.4	-26.6	0.675127	7	2-3,1133-1132;4-6,1130-1128;8-15,1126-1119;16-21,1117-1112	1-1,1134-1134[UP5];x-x,1131-1131[BULt];7-7,1127-1127[SIL];x-x,1118-1118[BULt]	((((((.((((((((.(((.((.&.))-))).))))))))-))))))	GAGAGACUCAAGUUGUCGGAGAU&UUC-CCGUCGACUUGA-UCUCUC	1	33.3045	4	0.995953	Output/S8h/cleaveLand_result/t_plot/PC-3p-12725_949_XM_016112267.2_1124_TPlot.pdf	0	0	NA	NA	NA	33.3045	0	Inf	up	7.8779e-09	1.42259e-08	yes	GO:0003824(catalytic activity);GO:0005488(binding);GO:0050662(coenzyme binding);GO:0048037(cofactor binding)	ko00040(Pentose and glucuronate interconversions);ko04120(Ubiquitin mediated proteolysis);ko01100(Metabolic pathways)
PC-3p-12725_949	XM_016112605.2	1789	1810	1801	-39.4	-29	0.736041	5.5	1-8,1810-1803;10-14,1801-1797;16-21,1794-1789	9-9,1802-1802[SIL];15-15,1796-1795[AILt]	((((((..(((((.((((((((&)))))))).)))))-.))))))	GAGAGACCCAAGUGGAUGGGAG&UUCCCGUCGACUUG-AUCUCUC	1	33.3045	4	0.318133	Output/S8h/cleaveLand_result/t_plot/PC-3p-12725_949_XM_016112605.2_1801_TPlot.pdf	0	0	NA	NA	NA	33.3045	0	Inf	up	7.8779e-09	1.42259e-08	yes	GO:0043229(intracellular organelle);GO:0009987(cellular process);GO:0009056(catabolic process);GO:0044424(intracellular part);GO:0043231(intracellular membrane-bounded organelle);GO:0044237(cellular metabolic process);GO:0043226(organelle);GO:0044248(cellular catabolic process);GO:0006914(autophagy);GO:0005622(intracellular);GO:0005623(cell);GO:0044464(cell part);GO:0061919(process utilizing auto…	NA
PC-3p-12725_949	XM_016116153.2	1422	1448	1438	-39.4	-25.7	0.652284	16.5	1-5,1448-1444;7-12,1441-1436;13-21,1430-1422	6-6,1443-1442[AILt];x-x,1435-1431[BULt]	(((((((((.....((((((..(((((&)))))-.))))))-----)))))))))	GAGGGAUCAAGUGAGGUUGAGAGGGAA&UUCCC-GUCGACU-----UGAUCUCUC	0	0	NA	NA	NA	1	30.281	4	0.999967	Output/S0h/cleaveLand_result/t_plot/PC-3p-12725_949_XM_016116153.2_1438_TPlot.pdf	0	30.281	-Inf	down	3.7368e-08	4.29087e-08	yes	GO:0046872(metal ion binding);GO:0005488(binding);GO:0016020(membrane);GO:0043167(ion binding);GO:0043169(cation binding)	NA
PC-3p-12725_949	XM_016117149.2	1434	1455	1445	-39.4	-25.8	0.654822	8	1-3,1455-1453;4-9,1451-1446;11-20,1444-1435	x-x,1452-1452[BULt];10-10,1445-1445[SIL];21-21,1434-1434[UP3]	.((((((((((.((((((.(((&)))-)))))).)))))))))).	CGGAGAUUAGGGCGGCGGUGAA&UUC-CCGUCGACUUGAUCUCUC	5	166.522	2	0.955344	Output/S8h/cleaveLand_result/t_plot/PC-3p-12725_949_XM_016117149.2_1445_TPlot.pdf	1	30.281	4	0.99993	Output/S0h/cleaveLand_result/t_plot/PC-3p-12725_949_XM_016117149.2_1445_TPlot.pdf	166.522	30.281	2.45923	up	2.6771e-22	3.94167e-21	yes	GO:0034357(photosynthetic membrane);GO:0031967(organelle envelope);GO:0071704(organic substance metabolic process);GO:0044281(small molecule metabolic process);GO:0005506(iron ion binding);GO:0044464(cell part);GO:0044283(small molecule biosynthetic process);GO:0046394(carboxylic acid biosynthetic process);GO:1901576(organic substance biosynthetic process);GO:0005622(intracellular);GO:0008152(met…	ko01100(Metabolic pathways);ko01110(Biosynthesis of secondary metabolites);ko00592(alpha-Linolenic acid metabolism)
PC-3p-12725_949	XM_021132483.1	628	657	648	-39.4	-27.2	0.690355	22.5	1-5,657-653;7-12,651-646;13-21,636-628	6-6,652-652[SIL];x-x,645-637[BULt]	(((((((((.........((((((.(((((&))))).))))))---------)))))))))	GGGAGAUCACACCAUCAUGGUCGGAGGGAA&UUCCCGUCGACU---------UGAUCUCUC	1	33.3045	4	0.931467	Output/S8h/cleaveLand_result/t_plot/PC-3p-12725_949_XM_021132483.1_648_TPlot.pdf	0	0	NA	NA	NA	33.3045	0	Inf	up	7.8779e-09	1.42259e-08	yes	GO:0003824(catalytic activity);GO:0044260(cellular macromolecule metabolic process);GO:0043169(cation binding);GO:0043170(macromolecule metabolic process);GO:0009056(catabolic process);GO:0032446(protein modification by small protein conjugation);GO:0008152(metabolic process);GO:0036211(protein modification process);GO:0071704(organic substance metabolic process);GO:0051603(proteolysis involved i…	NA
PC-3p-12725_949	XM_021132488.1	388	417	408	-39.4	-27.2	0.690355	22.5	1-5,417-413;7-12,411-406;13-21,396-388	6-6,412-412[SIL];x-x,405-397[BULt]	(((((((((.........((((((.(((((&))))).))))))---------)))))))))	GGGAGAUCACACCAUCAUGGUCGGAGGGAA&UUCCCGUCGACU---------UGAUCUCUC	1	33.3045	4	0.907691	Output/S8h/cleaveLand_result/t_plot/PC-3p-12725_949_XM_021132488.1_408_TPlot.pdf	0	0	NA	NA	NA	33.3045	0	Inf	up	7.8779e-09	1.42259e-08	yes	GO:0003824(catalytic activity);GO:0044260(cellular macromolecule metabolic process);GO:0043169(cation binding);GO:0043170(macromolecule metabolic process);GO:0009056(catabolic process);GO:0032446(protein modification by small protein conjugation);GO:0008152(metabolic process);GO:0036211(protein modification process);GO:0071704(organic substance metabolic process);GO:0051603(proteolysis involved i…	NA
PC-3p-12911_938	BGI_novel_T004127	1589	1610	1600	-28.7	-18.7	0.651568	13	2-9,1609-1602;14-21,1596-1589	1-1,1610-1610[UP5];10-13,1601-1597[AILt]	((((((((.....((((((((.&.))))))))-....))))))))	GCUGAGCUUGGAGAGUUGAAGC&UUUUUAAUU-AAGUAGCUCAGC	1	33.3045	4	1	Output/S8h/cleaveLand_result/t_plot/PC-3p-12911_938_BGI_novel_T004127_1600_TPlot.pdf	2	60.562	2	0.999864	Output/S0h/cleaveLand_result/t_plot/PC-3p-12911_938_BGI_novel_T004127_1600_TPlot.pdf	33.3045	60.562	-0.862697	down	0.0049011	0.0052713	yes	GO:0003723(RNA binding);GO:0097159(organic cyclic compound binding);GO:0003676(nucleic acid binding);GO:1901265(nucleoside phosphate binding);GO:0000166(nucleotide binding);GO:0005488(binding);GO:0036094(small molecule binding);GO:1901363(heterocyclic compound binding)	ko03013(RNA transport);ko03040(Spliceosome);ko03015(mRNA surveillance pathway)
PC-3p-12911_938	BGI_novel_T005230	1162	1182	1173	-28.7	-19.5	0.679443	14.5	7-21,1176-1162	1-6,1182-1177[UP5]	(((((((((((((((......&......)))))))))))))))	GUUGAGUUGCUUGGUGUCAAA&UUUUUAAUUAAGUAGCUCAGC	1	33.3045	4	0.999998	Output/S8h/cleaveLand_result/t_plot/PC-3p-12911_938_BGI_novel_T005230_1173_TPlot.pdf	0	0	NA	NA	NA	33.3045	0	Inf	up	7.8779e-09	1.42259e-08	yes	NA	NA
PC-3p-12911_938	BGI_novel_T005231	1162	1182	1173	-28.7	-19.5	0.679443	14.5	7-21,1176-1162	1-6,1182-1177[UP5]	(((((((((((((((......&......)))))))))))))))	GUUGAGUUGCUUGGUGUCAAA&UUUUUAAUUAAGUAGCUCAGC	1	33.3045	4	0.999998	Output/S8h/cleaveLand_result/t_plot/PC-3p-12911_938_BGI_novel_T005231_1173_TPlot.pdf	0	0	NA	NA	NA	33.3045	0	Inf	up	7.8779e-09	1.42259e-08	yes	NA	NA
PC-3p-12911_938	BGI_novel_T006280	815	835	826	-28.7	-18.8	0.655052	15.5	8-16,828-820;18-21,818-815	1-7,835-829[UP5];17-17,819-819[SIL]	((((.(((((((((.......&.......))))))))).))))	GCUGUGCUGCUUGACAACGAA&UUUUUAAUUAAGUAGCUCAGC	1	33.3045	4	1	Output/S8h/cleaveLand_result/t_plot/PC-3p-12911_938_BGI_novel_T006280_826_TPlot.pdf	2	60.562	3	0.90471	Output/S0h/cleaveLand_result/t_plot/PC-3p-12911_938_BGI_novel_T006280_826_TPlot.pdf	33.3045	60.562	-0.862697	down	0.0049011	0.0052713	yes	GO:0043168(anion binding);GO:0003824(catalytic activity);GO:0032549(ribonucleoside binding);GO:0043232(intracellular non-membrane-bounded organelle);GO:0005198(structural molecule activity);GO:0016818(hydrolase activity, acting on acid anhydrides, in phosphorus-containing anhydrides);GO:0044424(intracellular part);GO:1901265(nucleoside phosphate binding);GO:0032553(ribonucleotide binding);GO:0044…	ko04145(Phagosome)
PC-3p-12911_938	BGI_novel_T006282	815	835	826	-28.7	-18.8	0.655052	15.5	8-16,828-820;18-21,818-815	1-7,835-829[UP5];17-17,819-819[SIL]	((((.(((((((((.......&.......))))))))).))))	GCUGUGCUGCUUGACAACGAA&UUUUUAAUUAAGUAGCUCAGC	2	66.6089	3	0.88365	Output/S8h/cleaveLand_result/t_plot/PC-3p-12911_938_BGI_novel_T006282_826_TPlot.pdf	0	0	NA	NA	NA	66.6089	0	Inf	up	3.3071e-16	2.0359e-15	yes	GO:0043168(anion binding);GO:0003824(catalytic activity);GO:0032549(ribonucleoside binding);GO:0043232(intracellular non-membrane-bounded organelle);GO:0005198(structural molecule activity);GO:0016818(hydrolase activity, acting on acid anhydrides, in phosphorus-containing anhydrides);GO:0044424(intracellular part);GO:1901265(nucleoside phosphate binding);GO:0032553(ribonucleotide binding);GO:0044…	ko04145(Phagosome)
PC-3p-12911_938	BGI_novel_T007307	794	814	805	-28.7	-19.5	0.679443	10	5-18,810-797	1-4,814-811[UP5];19-21,796-794[UP3]	...((((((((((((((....&....))))))))))))))...	AAGGAGCUACUUAAUUACGUC&UUUUUAAUUAAGUAGCUCAGC	0	0	NA	NA	NA	3	90.843	0	0.127059	Output/S0h/cleaveLand_result/t_plot/PC-3p-12911_938_BGI_novel_T007307_805_TPlot.pdf	0	90.843	-Inf	down	1.5521e-21	1.73737e-20	yes	GO:0006807(nitrogen compound metabolic process);GO:0006457(protein folding);GO:0043412(macromolecule modification);GO:0018193(peptidyl-amino acid modification);GO:0003755(peptidyl-prolyl cis-trans isomerase activity);GO:0044260(cellular macromolecule metabolic process);GO:0018208(peptidyl-proline modification);GO:0003824(catalytic activity);GO:0044267(cellular protein metabolic process);GO:000041…	ko03040(Spliceosome)
PC-3p-12911_938	BGI_novel_T007598	601	621	612	-28.7	-18.94	0.65993	15	1-6,621-616;12-21,610-601	7-11,615-611[SIL]	((((((((((.....((((((&)))))).....))))))))))	GCUGAGCUAUGUCAGUGGGGA&UUUUUAAUUAAGUAGCUCAGC	1	33.3045	4	1	Output/S8h/cleaveLand_result/t_plot/PC-3p-12911_938_BGI_novel_T007598_612_TPlot.pdf	0	0	NA	NA	NA	33.3045	0	Inf	up	7.8779e-09	1.42259e-08	yes	GO:0044085(cellular component biogenesis);GO:0071704(organic substance metabolic process);GO:0019538(protein metabolic process);GO:0010556(regulation of macromolecule biosynthetic process);GO:0097159(organic cyclic compound binding);GO:0043170(macromolecule metabolic process);GO:0044260(cellular macromolecule metabolic process);GO:0034645(cellular macromolecule biosynthetic process);GO:0044237(ce…	ko03013(RNA transport)
PC-3p-12911_938	XM_016076656.2	820	840	831	-28.7	-20.2	0.703833	7	2-5,839-836;8-13,833-828;15-21,826-820	1-1,840-840[UP5];6-7,835-834[SIL];14-14,827-827[SIL]	(((((((.((((((..((((.&.))))..)))))).)))))))	GCUGAGCAACUUAAGAAGAAG&UUUUUAAUUAAGUAGCUCAGC	0	0	NA	NA	NA	1	30.281	4	0.999347	Output/S0h/cleaveLand_result/t_plot/PC-3p-12911_938_XM_016076656.2_831_TPlot.pdf	0	30.281	-Inf	down	3.7368e-08	4.29087e-08	yes	GO:0046872(metal ion binding);GO:0051234(establishment of localization);GO:0006811(ion transport);GO:0005488(binding);GO:0030001(metal ion transport);GO:0051179(localization);GO:0006810(transport);GO:0043169(cation binding);GO:0043167(ion binding);GO:0006812(cation transport)	NA
PC-3p-12911_938	XM_016078799.2	1982	2003	1994	-28.7	-19.1	0.665505	7	1-7,2003-1997;9-17,1995-1987;18-20,1985-1983	8-8,1996-1996[SIL];x-x,1986-1986[BULt];21-21,1982-1982[UP3]	.(((.(((((((((.(((((((&))))))).)))))))))-))).	ACUGUAGCUACUUGCUUGAAGA&UUUUUAAUUAAGUAGCU-CAGC	1	33.3045	4	1	Output/S8h/cleaveLand_result/t_plot/PC-3p-12911_938_XM_016078799.2_1994_TPlot.pdf	0	0	NA	NA	NA	33.3045	0	Inf	up	7.8779e-09	1.42259e-08	yes	GO:0006796(phosphate-containing compound metabolic process);GO:0004722(protein serine/threonine phosphatase activity);GO:0016791(phosphatase activity);GO:0009987(cellular process);GO:0036211(protein modification process);GO:0016787(hydrolase activity);GO:0044238(primary metabolic process);GO:0008152(metabolic process);GO:0006793(phosphorus metabolic process);GO:0006807(nitrogen compound metabolic…	NA
PC-3p-12911_938	XM_016079084.2	753	775	765	-28.7	-20.1	0.700348	11.5	1-8,775-768;11-16,764-759;17-21,757-753	9-10,767-765[AILt];x-x,758-758[BULt]	(((((.((((((...((((((((&))))))))-..))))))-)))))	GCUGGUGCUACUGCUGUUGAGGA&UUUUUAAU-UAAGUAGC-UCAGC	0	0	NA	NA	NA	1	30.281	4	0.999695	Output/S0h/cleaveLand_result/t_plot/PC-3p-12911_938_XM_016079084.2_765_TPlot.pdf	0	30.281	-Inf	down	3.7368e-08	4.29087e-08	yes	GO:0016684(oxidoreductase activity, acting on peroxide as acceptor);GO:0003824(catalytic activity);GO:1901363(heterocyclic compound binding);GO:0016491(oxidoreductase activity);GO:0042221(response to chemical);GO:0009636(response to toxic substance);GO:1990748(cellular detoxification);GO:0098754(detoxification);GO:0004601(peroxidase activity);GO:0050896(response to stimulus);GO:0046906(tetrapyrro…	ko00053(Ascorbate and aldarate metabolism);ko00480(Glutathione metabolism)
PC-3p-12911_938	XM_016079933.2	608	629	620	-28.7	-18.9	0.658537	8	2-18,628-612;19-21,610-608	1-1,629-629[UP5];x-x,611-611[BULt]	(((.(((((((((((((((((.&.)))))))))))))))))-)))	GUUGGGGUUGCUUGGUUAAGGG&UUUUUAAUUAAGUAGCUC-AGC	0	0	NA	NA	NA	1	30.281	4	1	Output/S0h/cleaveLand_result/t_plot/PC-3p-12911_938_XM_016079933.2_620_TPlot.pdf	0	30.281	-Inf	down	3.7368e-08	4.29087e-08	yes	GO:0003676(nucleic acid binding);GO:0005488(binding);GO:0097159(organic cyclic compound binding);GO:1901363(heterocyclic compound binding);GO:0003723(RNA binding)	NA
PC-3p-12911_938	XM_016084473.2	1189	1209	1200	-28.7	-18.9	0.658537	14	7-18,1203-1192;20-21,1190-1189	1-6,1209-1204[UP5];19-19,1191-1191[SIL]	((.((((((((((((......&......)))))))))))).))	GCAGGGCUGCUUAGUGCUUAC&UUUUUAAUUAAGUAGCUCAGC	0	0	NA	NA	NA	1	30.281	4	1	Output/S0h/cleaveLand_result/t_plot/PC-3p-12911_938_XM_016084473.2_1200_TPlot.pdf	0	30.281	-Inf	down	3.7368e-08	4.29087e-08	yes	GO:0005451(monovalent cation:proton antiporter activity);GO:0044464(cell part);GO:0050801(ion homeostasis);GO:0006812(cation transport);GO:0015078(hydrogen ion transmembrane transporter activity);GO:0048878(chemical homeostasis);GO:0015081(sodium ion transmembrane transporter activity);GO:0005737(cytoplasm);GO:0055065(metal ion homeostasis);GO:0034220(ion transmembrane transport);GO:0043229(intra…	NA
PC-3p-12911_938	XM_016086461.2	3691	3712	3702	-28.7	-18.9	0.658537	10.5	1-6,3712-3707;9-21,3703-3691	7-8,3706-3704[AILt]	(((((((((((((...((((((&))))))-..)))))))))))))	GUUGAGCUAUUUAUUGUGAGGA&UUUUUA-AUUAAGUAGCUCAGC	1	33.3045	4	1	Output/S8h/cleaveLand_result/t_plot/PC-3p-12911_938_XM_016086461.2_3702_TPlot.pdf	0	0	NA	NA	NA	33.3045	0	Inf	up	7.8779e-09	1.42259e-08	yes	GO:0071704(organic substance metabolic process);GO:0044389(ubiquitin-like protein ligase binding);GO:0019538(protein metabolic process);GO:0005622(intracellular);GO:0003824(catalytic activity);GO:0016740(transferase activity);GO:0044424(intracellular part);GO:0036211(protein modification process);GO:0019899(enzyme binding);GO:0031625(ubiquitin protein ligase binding);GO:0070647(protein modificati…	ko04120(Ubiquitin mediated proteolysis)
PC-3p-12911_938	XM_016086511.1	815	837	828	-28.7	-21.3	0.74216	10	4-16,834-822;17-21,819-815	1-3,837-835[UP5];x-x,821-820[BULt]	(((((..(((((((((((((...&...)))))))))))))--)))))	GCUGAUAGCUACUUGGUUAGCUC&UUUUUAAUUAAGUAGC--UCAGC	1	33.3045	4	0.749117	Output/S8h/cleaveLand_result/t_plot/PC-3p-12911_938_XM_016086511.1_828_TPlot.pdf	12	363.372	2	0.392996	Output/S0h/cleaveLand_result/t_plot/PC-3p-12911_938_XM_016086511.1_828_TPlot.pdf	33.3045	363.372	-3.44766	down	1.0741e-61	1.16912e-59	yes	GO:0043167(ion binding);GO:0008270(zinc ion binding);GO:0052747(sinapyl alcohol dehydrogenase activity);GO:0008152(metabolic process);GO:0016616(oxidoreductase activity, acting on the CH-OH group of donors, NAD or NADP as acceptor);GO:0043169(cation binding);GO:0016614(oxidoreductase activity, acting on CH-OH group of donors);GO:0046914(transition metal ion binding);GO:0016491(oxidoreductase acti…	ko01100(Metabolic pathways);ko00940(Phenylpropanoid biosynthesis);ko01110(Biosynthesis of secondary metabolites)
PC-3p-12911_938	XM_016087626.2	497	518	509	-28.7	-20.2	0.703833	8.5	1-5,518-514;7-18,512-501;20-21,498-497	6-6,513-513[SIL];19-19,500-499[AILt]	((..((((((((((((.(((((&))))).))))))))))))-.))	GCCGGAGCUGCUUGAUGAGGGA&UUUUUAAUUAAGUAGCUC-AGC	1	33.3045	4	0.998963	Output/S8h/cleaveLand_result/t_plot/PC-3p-12911_938_XM_016087626.2_509_TPlot.pdf	0	0	NA	NA	NA	33.3045	0	Inf	up	7.8779e-09	1.42259e-08	yes	NA	NA
PC-3p-12911_938	XM_016095046.2	1310	1329	1320	-28.7	-20.4	0.710801	6	1-12,1329-1318;15-21,1316-1310	13-14,1317-1317[AILq]	(((((((.-((((((((((((&))))))))))))..)))))))	GCUGAGCC-UUUGAUUGAAGA&UUUUUAAUUAAGUAGCUCAGC	2	66.6089	2	0.858276	Output/S8h/cleaveLand_result/t_plot/PC-3p-12911_938_XM_016095046.2_1320_TPlot.pdf	0	0	NA	NA	NA	66.6089	0	Inf	up	3.3071e-16	2.0359e-15	yes	GO:0008168(methyltransferase activity);GO:0003824(catalytic activity);GO:0016741(transferase activity, transferring one-carbon groups);GO:0008152(metabolic process);GO:0016740(transferase activity);GO:0032259(methylation);GO:0016021(integral component of membrane);GO:0044425(membrane part);GO:0031224(intrinsic component of membrane);GO:0016020(membrane)	NA
PC-3p-12911_938	XM_016096014.2	978	1002	993	-28.7	-19.3	0.672474	11	1-6,1002-997;9-16,994-987;17-21,982-978	7-8,996-995[SIL];x-x,986-983[BULt]	(((((....((((((((..((((((&))))))..))))))))----)))))	GCUGGUAUUGCUGCUUAUGUGAAGA&UUUUUAAUUAAGUAGC----UCAGC	0	0	NA	NA	NA	3	90.843	2	0.997701	Output/S0h/cleaveLand_result/t_plot/PC-3p-12911_938_XM_016096014.2_993_TPlot.pdf	0	90.843	-Inf	down	1.5521e-21	1.73737e-20	yes	GO:0008652(cellular amino acid biosynthetic process);GO:1901605(alpha-amino acid metabolic process);GO:0019842(vitamin binding);GO:0006520(cellular amino acid metabolic process);GO:1901576(organic substance biosynthetic process);GO:0005488(binding);GO:0043168(anion binding);GO:0044238(primary metabolic process);GO:0009097(isoleucine biosynthetic process);GO:1901607(alpha-amino acid biosynthetic p…	ko01100(Metabolic pathways);ko00260(Glycine, serine and threonine metabolism);ko01200(Carbon metabolism);ko01110(Biosynthesis of secondary metabolites);ko01230(Biosynthesis of amino acids);ko00290(Valine, leucine and isoleucine biosynthesis)
PC-3p-12911_938	XM_016096457.2	1794	1819	1810	-28.7	-18.8	0.655052	12	2-13,1818-1807;14-21,1801-1794	1-1,1819-1819[UP5];x-x,1806-1802[BULt]	((((((((.....((((((((((((.&.))))))))))))-----))))))))	GUUGGGCUUCAGUACUUGGUUGAGGC&UUUUUAAUUAAGU-----AGCUCAGC	9	299.74	2	0.999703	Output/S8h/cleaveLand_result/t_plot/PC-3p-12911_938_XM_016096457.2_1810_TPlot.pdf	7	211.967	2	0.999813	Output/S0h/cleaveLand_result/t_plot/PC-3p-12911_938_XM_016096457.2_1810_TPlot.pdf	299.74	211.967	0.499873	up	0.00010417	0.000117233	yes	GO:0016830(carbon-carbon lyase activity);GO:0009445(putrescine metabolic process);GO:0009056(catabolic process);GO:0003824(catalytic activity);GO:0044237(cellular metabolic process);GO:0006596(polyamine biosynthetic process);GO:0006595(polyamine metabolic process);GO:0006525(arginine metabolic process);GO:0044281(small molecule metabolic process);GO:0044249(cellular biosynthetic process);GO:19015…	ko01100(Metabolic pathways);ko00330(Arginine and proline metabolism)
PC-3p-12911_938	XM_016100158.2	988	1008	999	-28.7	-19.04	0.663415	12.5	1-5,1008-1004;11-21,998-988	6-10,1003-999[SIL]	(((((((((((.....(((((&))))).....)))))))))))	GCUGAGUUACUCGAAGGAGAA&UUUUUAAUUAAGUAGCUCAGC	0	0	NA	NA	NA	1	30.281	4	1	Output/S0h/cleaveLand_result/t_plot/PC-3p-12911_938_XM_016100158.2_999_TPlot.pdf	0	30.281	-Inf	down	3.7368e-08	4.29087e-08	yes	NA	NA
PC-3p-12911_938	XM_016101256.2	736	757	747	-28.7	-18.7	0.651568	13	2-9,756-749;14-21,743-736	1-1,757-757[UP5];10-13,748-744[AILt]	((((((((.....((((((((.&.))))))))-....))))))))	GCUGAGCUUGGAGAGUUGAAGC&UUUUUAAUU-AAGUAGCUCAGC	0	0	NA	NA	NA	1	30.281	4	1	Output/S0h/cleaveLand_result/t_plot/PC-3p-12911_938_XM_016101256.2_747_TPlot.pdf	0	30.281	-Inf	down	3.7368e-08	4.29087e-08	yes	GO:0003723(RNA binding);GO:0097159(organic cyclic compound binding);GO:0003676(nucleic acid binding);GO:1901265(nucleoside phosphate binding);GO:0000166(nucleotide binding);GO:0005488(binding);GO:0036094(small molecule binding);GO:1901363(heterocyclic compound binding)	ko03013(RNA transport);ko03040(Spliceosome);ko03015(mRNA surveillance pathway)
PC-3p-12911_938	XM_016102340.2	1411	1437	1428	-28.7	-19.2	0.66899	13.5	1-10,1437-1428;11-17,1423-1417;18-21,1414-1411	x-x,1427-1424[BULt];x-x,1416-1415[BULt]	((((..(((((((....((((((((((&))))))))))----)))))))--))))	GCUGCAAGCUGCUGUCCUAGUUAGAGA&UUUUUAAUUA----AGUAGCU--CAGC	0	0	NA	NA	NA	1	30.281	4	1	Output/S0h/cleaveLand_result/t_plot/PC-3p-12911_938_XM_016102340.2_1428_TPlot.pdf	0	30.281	-Inf	down	3.7368e-08	4.29087e-08	yes	GO:0015031(protein transport);GO:0051641(cellular localization);GO:0006614(SRP-dependent cotranslational protein targeting to membrane);GO:0034613(cellular protein localization);GO:0046907(intracellular transport);GO:0044424(intracellular part);GO:0045047(protein targeting to ER);GO:0071702(organic substance transport);GO:0005622(intracellular);GO:0072599(establishment of protein localization to …	ko03060(Protein export)
PC-3p-12911_938	XM_016103522.2	1860	1880	1871	-28.7	-19.2	0.66899	16.5	9-21,1872-1860	1-8,1880-1873[UP5]	(((((((((((((........&........)))))))))))))	GCUGGGCUAUUUAUGGAAUUC&UUUUUAAUUAAGUAGCUCAGC	0	0	NA	NA	NA	1	30.281	4	1	Output/S0h/cleaveLand_result/t_plot/PC-3p-12911_938_XM_016103522.2_1871_TPlot.pdf	0	30.281	-Inf	down	3.7368e-08	4.29087e-08	yes	GO:1901565(organonitrogen compound catabolic process);GO:0044238(primary metabolic process);GO:0006508(proteolysis);GO:0019787(ubiquitin-like protein transferase activity);GO:0036211(protein modification process);GO:0005622(intracellular);GO:0009987(cellular process);GO:0019941(modification-dependent protein catabolic process);GO:0044248(cellular catabolic process);GO:0016740(transferase activity…	ko04120(Ubiquitin mediated proteolysis);ko04144(Endocytosis)
PC-3p-12911_938	XM_016103878.2	530	550	541	-28.7	-19	0.662021	13	6-11,545-540;14-21,537-530	1-5,550-546[UP5];12-13,539-538[SIL]	((((((((..((((((.....&.....))))))..))))))))	GCUGAGCUUAUUGAUUCCGUU&UUUUUAAUUAAGUAGCUCAGC	3	99.9134	2	0.998924	Output/S8h/cleaveLand_result/t_plot/PC-3p-12911_938_XM_016103878.2_541_TPlot.pdf	2	60.562	3	0.872753	Output/S0h/cleaveLand_result/t_plot/PC-3p-12911_938_XM_016103878.2_541_TPlot.pdf	99.9134	60.562	0.722265	up	0.0018931	0.00207573	yes	GO:0097367(carbohydrate derivative binding);GO:0005200(structural constituent of cytoskeleton);GO:0016817(hydrolase activity, acting on acid anhydrides);GO:0016462(pyrophosphatase activity);GO:0032553(ribonucleotide binding);GO:0001883(purine nucleoside binding);GO:0005737(cytoplasm);GO:0017111(nucleoside-triphosphatase activity);GO:0044464(cell part);GO:0005622(intracellular);GO:0005874(microtub…	ko04145(Phagosome)
PC-3p-12911_938	XM_016105858.2	4341	4352	4343	-28.7	-20.7	0.721254	2	11-21,4351-4341	10-10,4352-4352[SIL]	(((((((((((.&.)))))))))))	GCUGAGCUACUG&UUUUUAAUUAAG	0	0	NA	NA	NA	2	60.562	2	0.758493	Output/S0h/cleaveLand_result/t_plot/PC-3p-12911_938_XM_016105858.2_4343_TPlot.pdf	0	60.562	-Inf	down	7.123e-15	2.99612e-14	yes	GO:0065008(regulation of biological quality);GO:0016817(hydrolase activity, acting on acid anhydrides);GO:0005488(binding);GO:0010876(lipid localization);GO:0016462(pyrophosphatase activity);GO:0016818(hydrolase activity, acting on acid anhydrides, in phosphorus-containing anhydrides);GO:0016020(membrane);GO:0035639(purine ribonucleoside triphosphate binding);GO:0017111(nucleoside-triphosphatase …	NA
PC-3p-12911_938	XM_016108272.2	850	870	861	-28.7	-18.8	0.655052	15.5	8-16,863-855;18-21,853-850	1-7,870-864[UP5];17-17,854-854[SIL]	((((.(((((((((.......&.......))))))))).))))	GCUGUGCUGCUUGACAACGAA&UUUUUAAUUAAGUAGCUCAGC	2	66.6089	3	0.900367	Output/S8h/cleaveLand_result/t_plot/PC-3p-12911_938_XM_016108272.2_861_TPlot.pdf	1	30.281	4	1	Output/S0h/cleaveLand_result/t_plot/PC-3p-12911_938_XM_016108272.2_861_TPlot.pdf	66.6089	30.281	1.1373	up	0.00022361	0.000246722	yes	GO:0043168(anion binding);GO:0003824(catalytic activity);GO:0032549(ribonucleoside binding);GO:0043232(intracellular non-membrane-bounded organelle);GO:0005198(structural molecule activity);GO:0016818(hydrolase activity, acting on acid anhydrides, in phosphorus-containing anhydrides);GO:0044424(intracellular part);GO:1901265(nucleoside phosphate binding);GO:0032553(ribonucleotide binding);GO:0044…	ko04145(Phagosome)
PC-3p-12911_938	XM_016108402.2	753	774	764	-28.7	-19.7	0.686411	11.5	3-8,772-767;11-20,763-754	1-2,774-773[UP5];9-10,766-764[AILt];21-21,753-753[UP3]	.((((((((((...((((((..&..))))))-..)))))))))).	ACUGAGCUGCUGUUAUUAGAUA&UUUUUAAU-UAAGUAGCUCAGC	0	0	NA	NA	NA	1	30.281	4	0.99999	Output/S0h/cleaveLand_result/t_plot/PC-3p-12911_938_XM_016108402.2_764_TPlot.pdf	0	30.281	-Inf	down	3.7368e-08	4.29087e-08	yes	NA	NA
PC-3p-12911_938	XM_016109337.2	255	265	256	-28.7	-19.5	0.679443	3	12-21,264-255	11-11,265-265[SIL]	((((((((((.&.))))))))))	GCUGAGCUGCA&UUUUUAAUUAA	1	33.3045	4	0.999998	Output/S8h/cleaveLand_result/t_plot/PC-3p-12911_938_XM_016109337.2_256_TPlot.pdf	0	0	NA	NA	NA	33.3045	0	Inf	up	7.8779e-09	1.42259e-08	yes	GO:0030554(adenyl nucleotide binding);GO:0036094(small molecule binding);GO:1901363(heterocyclic compound binding);GO:0005488(binding);GO:0032553(ribonucleotide binding);GO:0097367(carbohydrate derivative binding);GO:0005515(protein binding);GO:0032559(adenyl ribonucleotide binding);GO:0000166(nucleotide binding);GO:0097159(organic cyclic compound binding);GO:0032555(purine ribonucleotide binding…	NA
PC-3p-12911_938	XM_016109458.2	2330	2354	2340	-28.7	-19.6	0.682927	12.5	1-8,2354-2347;9-16,2341-2334;18-21,2333-2330	x-x,2346-2342[BULt];17-17,x-x[BULq]	((((-((((((((.....((((((((&))))))))-----)))))))).))))	GCUG-GCUGCUUAGAGAAGUUAAAAA&UUUUUAAU-----UAAGUAGCUCAGC	0	0	NA	NA	NA	2	60.562	2	0.987638	Output/S0h/cleaveLand_result/t_plot/PC-3p-12911_938_XM_016109458.2_2340_TPlot.pdf	0	60.562	-Inf	down	7.123e-15	2.99612e-14	yes	GO:0097159(organic cyclic compound binding);GO:0030554(adenyl nucleotide binding);GO:0036094(small molecule binding);GO:0005524(ATP binding);GO:0017076(purine nucleotide binding);GO:0032555(purine ribonucleotide binding);GO:1901363(heterocyclic compound binding);GO:0035639(purine ribonucleoside triphosphate binding);GO:1901265(nucleoside phosphate binding);GO:0003824(catalytic activity);GO:003255…	ko03440(Homologous recombination)
PC-3p-12911_938	XM_016109999.2	589	608	600	-28.7	-18.9	0.658537	11	1-9,608-600;13-21,597-589	10-12,599-598[AILq]	(((((((((..-(((((((((&)))))))))...)))))))))	GCUGGGCUGUG-GGUUAAGGA&UUUUUAAUUAAGUAGCUCAGC	0	0	NA	NA	NA	1	30.281	4	1	Output/S0h/cleaveLand_result/t_plot/PC-3p-12911_938_XM_016109999.2_600_TPlot.pdf	0	30.281	-Inf	down	3.7368e-08	4.29087e-08	yes	NA	NA
PC-3p-12911_938	XM_016110000.2	589	608	600	-28.7	-18.9	0.658537	11	1-9,608-600;13-21,597-589	10-12,599-598[AILq]	(((((((((..-(((((((((&)))))))))...)))))))))	GCUGGGCUGUG-GGUUAAGGA&UUUUUAAUUAAGUAGCUCAGC	0	0	NA	NA	NA	1	30.281	4	1	Output/S0h/cleaveLand_result/t_plot/PC-3p-12911_938_XM_016110000.2_600_TPlot.pdf	0	30.281	-Inf	down	3.7368e-08	4.29087e-08	yes	NA	NA
PC-3p-12911_938	XM_016111447.2	2132	2152	2143	-28.7	-18.8	0.655052	8	1-10,2152-2143;12-16,2140-2136;18-21,2135-2132	11-11,2142-2141[AILt];17-17,x-x[BULq]	((((-(((((..((((((((((&))))))))))-.))))).))))	GCUG-GCUAUGAUGAUUAAAGA&UUUUUAAUUA-AGUAGCUCAGC	0	0	NA	NA	NA	2	60.562	2	0.999837	Output/S0h/cleaveLand_result/t_plot/PC-3p-12911_938_XM_016111447.2_2143_TPlot.pdf	0	60.562	-Inf	down	7.123e-15	2.99612e-14	yes	NA	NA
PC-3p-12911_938	XM_016113514.2	4005	4025	4016	-28.7	-20.1	0.700348	6.5	1-8,4025-4018;10-19,4016-4007	9-9,4017-4017[SIL];20-21,4006-4005[UP3]	..((((((((((.((((((((&)))))))).))))))))))..	CAUGAGCUGCUUCAUUGAGAA&UUUUUAAUUAAGUAGCUCAGC	1	33.3045	4	0.999538	Output/S8h/cleaveLand_result/t_plot/PC-3p-12911_938_XM_016113514.2_4016_TPlot.pdf	0	0	NA	NA	NA	33.3045	0	Inf	up	7.8779e-09	1.42259e-08	yes	GO:0016020(membrane);GO:0042623(ATPase activity, coupled);GO:0000166(nucleotide binding);GO:0016818(hydrolase activity, acting on acid anhydrides, in phosphorus-containing anhydrides);GO:0016462(pyrophosphatase activity);GO:0097159(organic cyclic compound binding);GO:0016887(ATPase activity);GO:0022857(transmembrane transporter activity);GO:0015399(primary active transmembrane transporter activit…	ko02010(ABC transporters)
PC-3p-12911_938	XM_016115678.2	1381	1402	1393	-28.7	-18.9	0.658537	8	2-6,1401-1397;8-17,1395-1386;18-21,1384-1381	1-1,1402-1402[UP5];7-7,1396-1396[SIL];x-x,1385-1385[BULt]	((((.((((((((((.(((((.&.))))).))))))))))-))))	GCUGAAGUUGCUUGAGUGGAAC&UUUUUAAUUAAGUAGCU-CAGC	0	0	NA	NA	NA	2	60.562	3	0.890606	Output/S0h/cleaveLand_result/t_plot/PC-3p-12911_938_XM_016115678.2_1393_TPlot.pdf	0	60.562	-Inf	down	7.123e-15	2.99612e-14	yes	GO:0016020(membrane);GO:0051179(localization);GO:0031224(intrinsic component of membrane);GO:0051234(establishment of localization);GO:0044425(membrane part);GO:0006810(transport);GO:0016021(integral component of membrane)	NA
PC-3p-12911_938	XM_016115739.2	326	346	337	-28.7	-19.8	0.689895	6.5	1-9,346-338;11-20,336-327	10-10,337-337[SIL];21-21,326-326[UP3]	.((((((((((.(((((((((&))))))))).)))))))))).	UUUGGGCUGCUAAGUUAAGAA&UUUUUAAUUAAGUAGCUCAGC	0	0	NA	NA	NA	1	30.281	4	0.999907	Output/S0h/cleaveLand_result/t_plot/PC-3p-12911_938_XM_016115739.2_337_TPlot.pdf	0	30.281	-Inf	down	3.7368e-08	4.29087e-08	yes	NA	ko04075(Plant hormone signal transduction)
PC-3p-12911_938	XM_016115841.2	209	219	210	-28.7	-19.6	0.682927	2	12-21,218-209	11-11,219-219[SIL]	((((((((((.&.))))))))))	GCUGAGCUACA&UUUUUAAUUAA	1	33.3045	4	0.999994	Output/S8h/cleaveLand_result/t_plot/PC-3p-12911_938_XM_016115841.2_210_TPlot.pdf	0	0	NA	NA	NA	33.3045	0	Inf	up	7.8779e-09	1.42259e-08	yes	NA	NA
PC-3p-12911_938	XM_016116124.2	1575	1595	1586	-28.7	-21	0.731707	12	6-10,1590-1586;12-21,1584-1575	1-5,1595-1591[UP5];11-11,1585-1585[SIL]	((((((((((.(((((.....&.....))))).))))))))))	GCUGAGCUACAUAGUUCGUAC&UUUUUAAUUAAGUAGCUCAGC	1	33.3045	4	0.867473	Output/S8h/cleaveLand_result/t_plot/PC-3p-12911_938_XM_016116124.2_1586_TPlot.pdf	0	0	NA	NA	NA	33.3045	0	Inf	up	7.8779e-09	1.42259e-08	yes	GO:0016020(membrane)	NA
PC-3p-12911_938	XM_016117748.2	303	322	314	-28.7	-22	0.766551	6	2-6,321-317;8-21,316-303	1-1,322-322[UP5];7-7,x-x[BULq]	((((((((((((((-(((((.&.))))).))))))))))))))	GCUGAGUUGCUUGG-UAAAAU&UUUUUAAUUAAGUAGCUCAGC	1	33.3045	4	0.471758	Output/S8h/cleaveLand_result/t_plot/PC-3p-12911_938_XM_016117748.2_314_TPlot.pdf	2	60.562	2	0.205791	Output/S0h/cleaveLand_result/t_plot/PC-3p-12911_938_XM_016117748.2_314_TPlot.pdf	33.3045	60.562	-0.862697	down	0.0049011	0.0052713	yes	NA	NA
PC-3p-12911_938	XM_016117918.2	344	364	355	-28.7	-22.88	0.797213	8.5	1-5,364-360;9-21,356-344	6-8,359-357[SIL]	(((((((((((((...(((((&)))))...)))))))))))))	GCUGGGCUACUUACAGAGAGA&UUUUUAAUUAAGUAGCUCAGC	0	0	NA	NA	NA	1	30.281	4	0.300761	Output/S0h/cleaveLand_result/t_plot/PC-3p-12911_938_XM_016117918.2_355_TPlot.pdf	0	30.281	-Inf	down	3.7368e-08	4.29087e-08	yes	GO:0008270(zinc ion binding);GO:0043169(cation binding);GO:0043167(ion binding);GO:0046872(metal ion binding);GO:0046914(transition metal ion binding);GO:0005488(binding)	NA
PC-3p-12911_938	XM_021126399.1	1908	1928	1919	-28.7	-18.7	0.651568	14.5	8-20,1921-1909	1-7,1928-1922[UP5];21-21,1908-1908[UP3]	.(((((((((((((.......&.......))))))))))))).	UCUGGGCUACUUAAAGCCAAG&UUUUUAAUUAAGUAGCUCAGC	0	0	NA	NA	NA	1	30.281	4	1	Output/S0h/cleaveLand_result/t_plot/PC-3p-12911_938_XM_021126399.1_1919_TPlot.pdf	0	30.281	-Inf	down	3.7368e-08	4.29087e-08	yes	NA	NA
PC-3p-12911_938	XM_021127209.1	385	405	396	-28.7	-22.88	0.797213	8.5	1-5,405-401;9-21,397-385	6-8,400-398[SIL]	(((((((((((((...(((((&)))))...)))))))))))))	GCUGGGCUACUUACAGAGAGA&UUUUUAAUUAAGUAGCUCAGC	1	33.3045	4	0.273197	Output/S8h/cleaveLand_result/t_plot/PC-3p-12911_938_XM_021127209.1_396_TPlot.pdf	2	60.562	2	0.108816	Output/S0h/cleaveLand_result/t_plot/PC-3p-12911_938_XM_021127209.1_396_TPlot.pdf	33.3045	60.562	-0.862697	down	0.0049011	0.0052713	yes	GO:0008270(zinc ion binding);GO:0043169(cation binding);GO:0043167(ion binding);GO:0046872(metal ion binding);GO:0046914(transition metal ion binding);GO:0005488(binding)	NA
PC-3p-12911_938	XM_021129055.1	1402	1424	1414	-28.7	-18.7	0.651568	8.5	2-9,1423-1416;11-12,1413-1412;13-21,1410-1402	1-1,1424-1424[UP5];10-10,1415-1414[AILt];x-x,1411-1411[BULt]	(((((((((.((..((((((((.&.))))))))-.))-)))))))))	GCUGAGUUAUCUGAAGUUAAAAG&UUUUUAAUU-AAG-UAGCUCAGC	1	33.3045	4	1	Output/S8h/cleaveLand_result/t_plot/PC-3p-12911_938_XM_021129055.1_1414_TPlot.pdf	0	0	NA	NA	NA	33.3045	0	Inf	up	7.8779e-09	1.42259e-08	yes	GO:0071704(organic substance metabolic process);GO:1901564(organonitrogen compound metabolic process);GO:0044237(cellular metabolic process);GO:0003824(catalytic activity);GO:0019538(protein metabolic process);GO:0009987(cellular process);GO:0044267(cellular protein metabolic process);GO:0042578(phosphoric ester hydrolase activity);GO:0006470(protein dephosphorylation);GO:0006464(cellular protein…	NA
PC-3p-12911_938	XM_021131482.1	1531	1551	1542	-28.7	-19.8	0.689895	11	1-5,1551-1547;8-9,1544-1543;12-21,1540-1531	6-7,1546-1545[SIL];10-11,1542-1541[SIL]	((((((((((..((..(((((&)))))..))..))))))))))	GCUGAGCUGCGGGAGAAGAAG&UUUUUAAUUAAGUAGCUCAGC	1	33.3045	4	0.999847	Output/S8h/cleaveLand_result/t_plot/PC-3p-12911_938_XM_021131482.1_1542_TPlot.pdf	0	0	NA	NA	NA	33.3045	0	Inf	up	7.8779e-09	1.42259e-08	yes	GO:0006725(cellular aromatic compound metabolic process);GO:0006139(nucleobase-containing compound metabolic process);GO:0044446(intracellular organelle part);GO:0043170(macromolecule metabolic process);GO:0008152(metabolic process);GO:0044424(intracellular part);GO:0019012(virion);GO:0090304(nucleic acid metabolic process);GO:0005623(cell);GO:0010467(gene expression);GO:0043229(intracellular org…	ko03040(Spliceosome)
PC-3p-12911_938	XM_021140803.1	754	775	765	-28.7	-19.7	0.686411	11.5	3-8,773-768;11-20,764-755	1-2,775-774[UP5];9-10,767-765[AILt];21-21,754-754[UP3]	.((((((((((...((((((..&..))))))-..)))))))))).	ACUGAGCUGCUGUUAUUAGAUA&UUUUUAAU-UAAGUAGCUCAGC	0	0	NA	NA	NA	2	60.562	2	0.976615	Output/S0h/cleaveLand_result/t_plot/PC-3p-12911_938_XM_021140803.1_765_TPlot.pdf	0	60.562	-Inf	down	7.123e-15	2.99612e-14	yes	NA	NA
PC-3p-12911_938	XM_021141190.1	2167	2186	2177	-28.7	-18.8	0.655052	5.5	1-11,2186-2176;15-21,2173-2167	12-14,2175-2174[AILq]	(((((((..-(((((((((((&)))))))))))...)))))))	GCUGAGUCA-UUAAUUAAAGA&UUUUUAAUUAAGUAGCUCAGC	1	33.3045	4	1	Output/S8h/cleaveLand_result/t_plot/PC-3p-12911_938_XM_021141190.1_2177_TPlot.pdf	0	0	NA	NA	NA	33.3045	0	Inf	up	7.8779e-09	1.42259e-08	yes	NA	NA
PC-3p-12911_938	XM_021142288.1	1017	1037	1028	-28.7	-19.5	0.679443	7	3-12,1035-1026;14-17,1025-1022;18-21,1020-1017	1-2,1037-1036[UP5];13-13,x-x[BULq];x-x,1021-1021[BULt]	((((.((((-((((((((((..&..)))))))))).))))-))))	GCUGAAGCU-CUUAAUUGGACA&UUUUUAAUUAAGUAGCU-CAGC	2	66.6089	2	0.988928	Output/S8h/cleaveLand_result/t_plot/PC-3p-12911_938_XM_021142288.1_1028_TPlot.pdf	5	151.405	2	0.99145	Output/S0h/cleaveLand_result/t_plot/PC-3p-12911_938_XM_021142288.1_1028_TPlot.pdf	66.6089	151.405	-1.18463	down	9.2879e-09	1.67329e-08	yes	NA	ko04626(Plant-pathogen interaction)
PC-3p-12911_938	XM_021142659.1	590	609	601	-28.7	-18.9	0.658537	11	1-9,609-601;13-21,598-590	10-12,600-599[AILq]	(((((((((..-(((((((((&)))))))))...)))))))))	GCUGGGCUGUG-GGUUAAGGA&UUUUUAAUUAAGUAGCUCAGC	0	0	NA	NA	NA	1	30.281	4	1	Output/S0h/cleaveLand_result/t_plot/PC-3p-12911_938_XM_021142659.1_601_TPlot.pdf	0	30.281	-Inf	down	3.7368e-08	4.29087e-08	yes	NA	NA
PC-3p-12911_938	XM_021143289.1	837	847	838	-28.7	-18.8	0.655052	3	12-21,846-837	11-11,847-847[SIL]	((((((((((.&.))))))))))	GCUGAGCUGCC&UUUUUAAUUAA	0	0	NA	NA	NA	2	60.562	3	0.916813	Output/S0h/cleaveLand_result/t_plot/PC-3p-12911_938_XM_021143289.1_838_TPlot.pdf	0	60.562	-Inf	down	7.123e-15	2.99612e-14	yes	GO:0003676(nucleic acid binding);GO:0005488(binding);GO:0097159(organic cyclic compound binding);GO:1901363(heterocyclic compound binding)	NA
PC-3p-13278_910	BGI_novel_T001257	1040	1061	1051	-37	-25.4	0.686486	10.5	3-9,1059-1053;12-21,1049-1040	1-2,1061-1060[UP5];10-11,1052-1050[AILt]	((((((((((...(((((((..&..)))))))-..))))))))))	GCCAAGAGCAUUGUUGCCAGCG&UUUUGGCAA-GCUGUUCUUGGC	2	66.6089	2	0.98325	Output/S8h/cleaveLand_result/t_plot/PC-3p-13278_910_BGI_novel_T001257_1051_TPlot.pdf	1	30.281	4	0.999997	Output/S0h/cleaveLand_result/t_plot/PC-3p-13278_910_BGI_novel_T001257_1051_TPlot.pdf	66.6089	30.281	1.1373	up	0.00022361	0.000246722	yes	GO:0035639(purine ribonucleoside triphosphate binding);GO:0032553(ribonucleotide binding);GO:0071704(organic substance metabolic process);GO:0044272(sulfur compound biosynthetic process);GO:0004478(methionine adenosyltransferase activity);GO:0006730(one-carbon metabolic process);GO:0044249(cellular biosynthetic process);GO:0003824(catalytic activity);GO:0046872(metal ion binding);GO:0097367(carbo…	ko00270(Cysteine and methionine metabolism);ko01100(Metabolic pathways);ko01110(Biosynthesis of secondary metabolites);ko01230(Biosynthesis of amino acids)
PC-3p-13278_910	BGI_novel_T002061	4879	4897	4888	-37	-24.2	0.654054	6.5	3-11,4895-4887;13-14,4886-4885;16-21,4884-4879	1-2,4897-4896[UP5];12-12,x-x[BULq];15-15,x-x[BULq]	((((((-((-(((((((((..&..))))))))).)).))))))	GCUAAG-AC-GCUUGCCAACC&UUUUGGCAAGCUGUUCUUGGC	3	99.9134	2	0.999975	Output/S8h/cleaveLand_result/t_plot/PC-3p-13278_910_BGI_novel_T002061_4888_TPlot.pdf	2	60.562	2	0.999986	Output/S0h/cleaveLand_result/t_plot/PC-3p-13278_910_BGI_novel_T002061_4888_TPlot.pdf	99.9134	60.562	0.722265	up	0.0018931	0.00207573	yes	GO:0003824(catalytic activity);GO:0043232(intracellular non-membrane-bounded organelle);GO:0006338(chromatin remodeling);GO:0003676(nucleic acid binding);GO:0070013(intracellular organelle lumen);GO:0016070(RNA metabolic process);GO:0032774(RNA biosynthetic process);GO:0097659(nucleic acid-templated transcription);GO:0043229(intracellular organelle);GO:0018130(heterocycle biosynthetic process);GO…	NA
PC-3p-13278_910	BGI_novel_T003884	2207	2227	2219	-37	-24.8	0.67027	10.5	3-7,2225-2221;10-19,2219-2210;20-21,2208-2207	1-2,2227-2226[UP5];8-9,2220-2220[AILq];x-x,2209-2209[BULt]	((.((((((((((.-(((((..&..)))))..))))))))))-))	GCUCAAGAGCAGUG-GCCGACU&UUUUGGCAAGCUGUUCUUG-GC	0	0	NA	NA	NA	1	30.281	4	1	Output/S0h/cleaveLand_result/t_plot/PC-3p-13278_910_BGI_novel_T003884_2219_TPlot.pdf	0	30.281	-Inf	down	3.7368e-08	4.29087e-08	yes	GO:0016021(integral component of membrane);GO:0016884(carbon-nitrogen ligase activity, with glutamine as amido-N-donor);GO:0003824(catalytic activity);GO:0016740(transferase activity);GO:0004040(amidase activity);GO:0016020(membrane);GO:0031224(intrinsic component of membrane);GO:0016874(ligase activity);GO:0016879(ligase activity, forming carbon-nitrogen bonds);GO:0016810(hydrolase activity, act…	ko00380(Tryptophan metabolism);ko01100(Metabolic pathways);ko00330(Arginine and proline metabolism);ko00970(Aminoacyl-tRNA biosynthesis);ko00360(Phenylalanine metabolism)
PC-3p-13278_910	BGI_novel_T004742	1934	1953	1944	-37	-27.6	0.745946	7	4-14,1950-1940;16-20,1939-1935	1-3,1953-1951[UP5];15-15,x-x[BULq];21-21,1934-1934[UP3]	.(((((-(((((((((((...&...))))))))))).))))).	CCCAAG-ACAGCUUGCCAUCA&UUUUGGCAAGCUGUUCUUGGC	0	0	NA	NA	NA	1	30.281	4	0.860221	Output/S0h/cleaveLand_result/t_plot/PC-3p-13278_910_BGI_novel_T004742_1944_TPlot.pdf	0	30.281	-Inf	down	3.7368e-08	4.29087e-08	yes	GO:0097159(organic cyclic compound binding);GO:0044464(cell part);GO:0003677(DNA binding);GO:0043227(membrane-bounded organelle);GO:0016020(membrane);GO:0005622(intracellular);GO:0043226(organelle);GO:1901363(heterocyclic compound binding);GO:0005623(cell);GO:0043231(intracellular membrane-bounded organelle);GO:0043229(intracellular organelle);GO:0003676(nucleic acid binding);GO:0005634(nucleus);…	ko04075(Plant hormone signal transduction)
PC-3p-13278_910	BGI_novel_T005128	1008	1029	1020	-37	-25.8	0.697297	6	1-12,1029-1018;14-19,1015-1010	13-13,1017-1016[AILt];20-21,1009-1008[UP3]	..((((((..((((((((((((&))))))))))))-.))))))..	AACAAGAAGGAGCUUGCCAAGA&UUUUGGCAAGCU-GUUCUUGGC	1	33.3045	4	0.999464	Output/S8h/cleaveLand_result/t_plot/PC-3p-13278_910_BGI_novel_T005128_1020_TPlot.pdf	0	0	NA	NA	NA	33.3045	0	Inf	up	7.8779e-09	1.42259e-08	yes	GO:0044422(organelle part);GO:0032991(macromolecular complex);GO:0097159(organic cyclic compound binding);GO:0005488(binding);GO:0005875(microtubule associated complex);GO:0016818(hydrolase activity, acting on acid anhydrides, in phosphorus-containing anhydrides);GO:0036094(small molecule binding);GO:0044464(cell part);GO:0035639(purine ribonucleoside triphosphate binding);GO:0017076(purine nucle…	NA
PC-3p-13278_910	BGI_novel_T006304	1080	1100	1091	-37	-24.8	0.67027	4	1-13,1100-1088;15-16,1086-1085;18-20,1083-1081	14-14,1087-1087[SIL];17-17,1084-1084[SIL];21-21,1080-1080[UP3]	.(((.((.(((((((((((((&))))))))))))).)).))).	ACCAUGAUCAGCUUGUCAAAA&UUUUGGCAAGCUGUUCUUGGC	0	0	NA	NA	NA	1	30.281	4	1	Output/S0h/cleaveLand_result/t_plot/PC-3p-13278_910_BGI_novel_T006304_1091_TPlot.pdf	0	30.281	-Inf	down	3.7368e-08	4.29087e-08	yes	GO:0005524(ATP binding);GO:1901363(heterocyclic compound binding);GO:1901564(organonitrogen compound metabolic process);GO:0043170(macromolecule metabolic process);GO:0008152(metabolic process);GO:0003824(catalytic activity);GO:0044237(cellular metabolic process);GO:0032555(purine ribonucleotide binding);GO:0043167(ion binding);GO:0036211(protein modification process);GO:0006468(protein phosphory…	ko03008(Ribosome biogenesis in eukaryotes);ko04712(Circadian rhythm - plant)
PC-3p-13278_910	BGI_novel_T006634	1786	1806	1797	-37	-24.7	0.667568	7.5	1-5,1806-1802;7-17,1800-1790;19-21,1788-1786	6-6,1801-1801[SIL];18-18,1789-1789[SIL]	(((.(((((((((((.(((((&))))).))))))))))).)))	GCUUAGAACGGUUUGGCGAGA&UUUUGGCAAGCUGUUCUUGGC	0	0	NA	NA	NA	1	30.281	4	1	Output/S0h/cleaveLand_result/t_plot/PC-3p-13278_910_BGI_novel_T006634_1797_TPlot.pdf	0	30.281	-Inf	down	3.7368e-08	4.29087e-08	yes	GO:0046483(heterocycle metabolic process);GO:0030554(adenyl nucleotide binding);GO:0009987(cellular process);GO:0044424(intracellular part);GO:0048731(system development);GO:0035670(plant-type ovary development);GO:0048437(floral organ development);GO:0043227(membrane-bounded organelle);GO:0048438(floral whorl development);GO:0097367(carbohydrate derivative binding);GO:0022414(reproductive proces…	ko00970(Aminoacyl-tRNA biosynthesis)
PC-3p-13278_910	BGI_novel_T006746	237	258	249	-37	-24.4	0.659459	8	2-4,257-255;6-9,253-250;11-19,248-240;20-21,238-237	1-1,258-258[UP5];5-5,254-254[SIL];10-10,249-249[SIL];x-x,239-239[BULt]	((.(((((((((.((((.(((.&.))).)))).)))))))))-))	GCUCAAGAACAGGUUGUGGAAC&UUUUGGCAAGCUGUUCUUG-GC	0	0	NA	NA	NA	1	30.281	4	1	Output/S0h/cleaveLand_result/t_plot/PC-3p-13278_910_BGI_novel_T006746_249_TPlot.pdf	0	30.281	-Inf	down	3.7368e-08	4.29087e-08	yes	GO:0044237(cellular metabolic process);GO:0009987(cellular process);GO:0090304(nucleic acid metabolic process);GO:0006807(nitrogen compound metabolic process);GO:0043169(cation binding);GO:0006725(cellular aromatic compound metabolic process);GO:0043167(ion binding);GO:0006259(DNA metabolic process);GO:0006139(nucleobase-containing compound metabolic process);GO:0033554(cellular response to stres…	ko03440(Homologous recombination)
PC-3p-13278_910	BGI_novel_T007574	358	376	368	-37	-24.6	0.664865	7.5	1-8,376-369;10-17,368-361;19-21,360-358	9-9,x-x[BULq];18-18,x-x[BULq]	(((-((((((((-((((((((&)))))))).)))))))).)))	GCU-GGAGCAGC-UGCCGGGA&UUUUGGCAAGCUGUUCUUGGC	1	33.3045	4	1	Output/S8h/cleaveLand_result/t_plot/PC-3p-13278_910_BGI_novel_T007574_368_TPlot.pdf	0	0	NA	NA	NA	33.3045	0	Inf	up	7.8779e-09	1.42259e-08	yes	NA	NA
PC-3p-13278_910	BGI_novel_T008878	1037	1055	1046	-37	-28.6	0.772973	4.5	2-12,1054-1044;15-21,1043-1037	1-1,1055-1055[UP5];13-14,x-x[BULq]	(((((((--(((((((((((.&.)))))))))))..)))))))	GCCAGGA--AGCUUGCCAGAC&UUUUGGCAAGCUGUUCUUGGC	0	0	NA	NA	NA	1	30.281	4	0.542787	Output/S0h/cleaveLand_result/t_plot/PC-3p-13278_910_BGI_novel_T008878_1046_TPlot.pdf	0	30.281	-Inf	down	3.7368e-08	4.29087e-08	yes	NA	NA
PC-3p-13278_910	BGI_novel_T008879	1486	1504	1495	-37	-28.6	0.772973	4.5	2-12,1503-1493;15-21,1492-1486	1-1,1504-1504[UP5];13-14,x-x[BULq]	(((((((--(((((((((((.&.)))))))))))..)))))))	GCCAGGA--AGCUUGCCAGAC&UUUUGGCAAGCUGUUCUUGGC	0	0	NA	NA	NA	1	30.281	4	0.465319	Output/S0h/cleaveLand_result/t_plot/PC-3p-13278_910_BGI_novel_T008879_1495_TPlot.pdf	0	30.281	-Inf	down	3.7368e-08	4.29087e-08	yes	NA	NA
PC-3p-13278_910	BGI_novel_T010456	2394	2424	2413	-37	-24.5	0.662162	14	1-8,2424-2417;9-17,2414-2406;18-21,2397-2394	x-x,2416-2415[BULt];x-x,2405-2398[BULt]	((((........(((((((((..((((((((&))))))))--)))))))))--------))))	GCUAUGGGUUCUGGAACAGCUGUUGCCAAGA&UUUUGGCA--AGCUGUUCU--------UGGC	0	0	NA	NA	NA	2	60.562	2	0.999922	Output/S0h/cleaveLand_result/t_plot/PC-3p-13278_910_BGI_novel_T010456_2413_TPlot.pdf	0	60.562	-Inf	down	7.123e-15	2.99612e-14	yes	GO:0048878(chemical homeostasis);GO:0005384(manganese ion transmembrane transporter activity);GO:0044424(intracellular part);GO:0098771(inorganic ion homeostasis);GO:0065007(biological regulation);GO:0051179(localization);GO:0043226(organelle);GO:0046872(metal ion binding);GO:0098588(bounding membrane of organelle);GO:0072511(divalent inorganic cation transport);GO:0055065(metal ion homeostasis);…	NA
PC-3p-13278_910	BGI_novel_T012529	330	350	341	-37	-24.8	0.67027	7.5	2-7,349-344;10-12,341-339;14-18,337-333;20-21,331-330	1-1,350-350[UP5];8-9,343-342[SIL];13-13,338-338[SIL];19-19,332-332[SIL]	((.(((((.(((..((((((.&.))))))..))).))))).))	GCGAAGAGGAGCAGGCCAAAG&UUUUGGCAAGCUGUUCUUGGC	0	0	NA	NA	NA	1	30.281	4	1	Output/S0h/cleaveLand_result/t_plot/PC-3p-13278_910_BGI_novel_T012529_341_TPlot.pdf	0	30.281	-Inf	down	3.7368e-08	4.29087e-08	yes	NA	ko00620(Pyruvate metabolism);ko01200(Carbon metabolism);ko00710(Carbon fixation in photosynthetic organisms);ko01100(Metabolic pathways)
PC-3p-13278_910	BGI_novel_T012791	1337	1358	1349	-37	-24.5	0.662162	9	4-10,1355-1349;12-14,1347-1345;15-21,1343-1337	1-3,1358-1356[UP5];11-11,1348-1348[SIL];x-x,1344-1344[BULt]	(((((((.(((.(((((((...&...))))))).)))-)))))))	GCCAAGAUACAUCUUGCCGCUA&UUUUGGCAAGCUGU-UCUUGGC	1	33.3045	4	1	Output/S8h/cleaveLand_result/t_plot/PC-3p-13278_910_BGI_novel_T012791_1349_TPlot.pdf	0	0	NA	NA	NA	33.3045	0	Inf	up	7.8779e-09	1.42259e-08	yes	GO:1901363(heterocyclic compound binding);GO:0043168(anion binding);GO:0004672(protein kinase activity);GO:0030554(adenyl nucleotide binding);GO:1901265(nucleoside phosphate binding);GO:0006796(phosphate-containing compound metabolic process);GO:1901564(organonitrogen compound metabolic process);GO:0032559(adenyl ribonucleotide binding);GO:0007154(cell communication);GO:0009987(cellular process);…	NA
PC-3p-13278_910	BGI_novel_T013693	1519	1542	1531	-37	-27.1	0.732432	11	4-8,1539-1535;9-13,1532-1528;14-21,1526-1519	1-3,1542-1540[UP5];x-x,1534-1533[BULt];x-x,1527-1527[BULt]	((((((((.(((((..(((((...&...)))))--)))))-))))))))	GCCAGGAGUCAGCUAAUGCCACAC&UUUUGGCA--AGCUG-UUCUUGGC	1	33.3045	4	0.935704	Output/S8h/cleaveLand_result/t_plot/PC-3p-13278_910_BGI_novel_T013693_1531_TPlot.pdf	0	0	NA	NA	NA	33.3045	0	Inf	up	7.8779e-09	1.42259e-08	yes	GO:0031326(regulation of cellular biosynthetic process);GO:0009889(regulation of biosynthetic process);GO:0005634(nucleus);GO:0044212(transcription regulatory region DNA binding);GO:0006357(regulation of transcription from RNA polymerase II promoter);GO:0043227(membrane-bounded organelle);GO:0001134(transcription factor activity, transcription factor recruiting);GO:0000988(transcription factor ac…	NA
PC-3p-13278_910	BGI_novel_T014179	2056	2081	2067	-37	-24.52	0.662703	20.5	5-8,2077-2074;10-21,2067-2056	1-4,2081-2078[UP5];9-9,2073-2068[AILt]	((((((((((((......((((....&....))))-----.))))))))))))	GCCGAGGGCAGCCCCCUCUGCCCCUC&UUUUGGCA-----AGCUGUUCUUGGC	2	66.6089	3	0.909665	Output/S8h/cleaveLand_result/t_plot/PC-3p-13278_910_BGI_novel_T014179_2067_TPlot.pdf	1	30.281	4	1	Output/S0h/cleaveLand_result/t_plot/PC-3p-13278_910_BGI_novel_T014179_2067_TPlot.pdf	66.6089	30.281	1.1373	up	0.00022361	0.000246722	yes	NA	ko01100(Metabolic pathways);ko00190(Oxidative phosphorylation)
PC-3p-13278_910	XM_016076842.2	992	1014	1004	-37	-25.8	0.697297	6.5	1-6,1014-1009;7-14,1007-1000;16-21,997-992	x-x,1008-1008[BULt];15-15,999-998[AILt]	((((((..((((((((.((((((&))))))-))))))))-.))))))	GCCAGGCCACAGUUUGACCAGAA&UUUUGG-CAAGCUGU-UCUUGGC	1	33.3045	4	0.999557	Output/S8h/cleaveLand_result/t_plot/PC-3p-13278_910_XM_016076842.2_1004_TPlot.pdf	1	30.281	4	0.999701	Output/S0h/cleaveLand_result/t_plot/PC-3p-13278_910_XM_016076842.2_1004_TPlot.pdf	33.3045	30.281	0.137303	up	0.70456	0.704918	yes	GO:0071840(cellular component organization or biogenesis);GO:0044464(cell part);GO:0016043(cellular component organization);GO:0097159(organic cyclic compound binding);GO:0009987(cellular process);GO:0043227(membrane-bounded organelle);GO:0005634(nucleus);GO:0043231(intracellular membrane-bounded organelle);GO:0003723(RNA binding);GO:1901363(heterocyclic compound binding);GO:0022613(ribonucleopro…	ko03015(mRNA surveillance pathway)
PC-3p-13278_910	XM_016077350.2	823	842	833	-37	-24.6	0.664865	11.5	5-14,838-829;16-21,828-823	1-4,842-839[UP5];15-15,x-x[BULq]	((((((-((((((((((....&....)))))))))).))))))	GCCAGG-ACGGCUUGUUGCAC&UUUUGGCAAGCUGUUCUUGGC	2	66.6089	3	0.90238	Output/S8h/cleaveLand_result/t_plot/PC-3p-13278_910_XM_016077350.2_833_TPlot.pdf	0	0	NA	NA	NA	66.6089	0	Inf	up	3.3071e-16	2.0359e-15	yes	GO:0036211(protein modification process);GO:0050896(response to stimulus);GO:0005524(ATP binding);GO:0065007(biological regulation);GO:0009987(cellular process);GO:1901363(heterocyclic compound binding);GO:0050789(regulation of biological process);GO:0043170(macromolecule metabolic process);GO:0006464(cellular protein modification process);GO:0016310(phosphorylation);GO:0043167(ion binding);GO:00…	NA
PC-3p-13278_910	XM_016078762.2	979	1000	991	-37	-24.1	0.651351	12	5-10,996-991;12-21,988-979	1-4,1000-997[UP5];11-11,990-989[AILt]	((((((((((..((((((....&....))))))-.))))))))))	GCCAAGAACAAAUUUGCCUGUG&UUUUGGCAAG-CUGUUCUUGGC	4	133.218	2	0.999989	Output/S8h/cleaveLand_result/t_plot/PC-3p-13278_910_XM_016078762.2_991_TPlot.pdf	0	0	NA	NA	NA	133.218	0	Inf	up	8.0653e-31	2.42945e-29	yes	GO:1903506(regulation of nucleic acid-templated transcription);GO:0003677(DNA binding);GO:0060255(regulation of macromolecule metabolic process);GO:0050789(regulation of biological process);GO:0010468(regulation of gene expression);GO:0010556(regulation of macromolecule biosynthetic process);GO:0005488(binding);GO:0006355(regulation of transcription, DNA-templated);GO:2000112(regulation of cellul…	ko04075(Plant hormone signal transduction)
PC-3p-13278_910	XM_016080063.2	767	786	778	-37	-25	0.675676	7.5	2-8,785-779;10-13,778-775;15-21,773-767	1-1,786-786[UP5];9-9,x-x[BULq];14-14,774-774[SIL]	(((((((.((((-(((((((.&.))))))).)))).)))))))	GUCAAGACCGGC-UGCCGGAG&UUUUGGCAAGCUGUUCUUGGC	1	33.3045	4	1	Output/S8h/cleaveLand_result/t_plot/PC-3p-13278_910_XM_016080063.2_778_TPlot.pdf	0	0	NA	NA	NA	33.3045	0	Inf	up	7.8779e-09	1.42259e-08	yes	NA	ko04144(Endocytosis)
PC-3p-13278_910	XM_016080425.2	1237	1258	1249	-37	-28.1	0.759459	7	3-12,1256-1247;13-16,1245-1242;18-21,1240-1237	1-2,1258-1257[UP5];x-x,1246-1246[BULt];17-17,1241-1241[SIL]	((((.((((.((((((((((..&..))))))))))-)))).))))	GCCAUGGGCAAGCUUGCCAAUC&UUUUGGCAAGCU-GUUCUUGGC	0	0	NA	NA	NA	1	30.281	4	0.680299	Output/S0h/cleaveLand_result/t_plot/PC-3p-13278_910_XM_016080425.2_1249_TPlot.pdf	0	30.281	-Inf	down	3.7368e-08	4.29087e-08	yes	GO:0006355(regulation of transcription, DNA-templated);GO:0019222(regulation of metabolic process);GO:0003677(DNA binding);GO:0050794(regulation of cellular process);GO:0060255(regulation of macromolecule metabolic process);GO:0050789(regulation of biological process);GO:2000112(regulation of cellular macromolecule biosynthetic process);GO:0043565(sequence-specific DNA binding);GO:1903506(regulat…	ko04075(Plant hormone signal transduction)
PC-3p-13278_910	XM_016080440.2	364	384	375	-37	-25.3	0.683784	10.5	5-12,380-373;15-21,370-364	1-4,384-381[UP5];13-14,372-371[SIL]	(((((((..((((((((....&....))))))))..)))))))	GCCAGGAUGAGCUUGCUCUUU&UUUUGGCAAGCUGUUCUUGGC	0	0	NA	NA	NA	1	30.281	4	0.999999	Output/S0h/cleaveLand_result/t_plot/PC-3p-13278_910_XM_016080440.2_375_TPlot.pdf	0	30.281	-Inf	down	3.7368e-08	4.29087e-08	yes	GO:0031224(intrinsic component of membrane);GO:0016021(integral component of membrane);GO:0044425(membrane part);GO:0016020(membrane)	NA
PC-3p-13278_910	XM_016082228.2	365	384	376	-37	-25.1	0.678378	12.5	5-7,380-378;10-21,376-365	1-4,384-381[UP5];8-9,377-377[AILq]	((((((((((((.-(((....&....)))..))))))))))))	GCCAGGAACAGUA-GCCCUUC&UUUUGGCAAGCUGUUCUUGGC	0	0	NA	NA	NA	1	30.281	4	1	Output/S0h/cleaveLand_result/t_plot/PC-3p-13278_910_XM_016082228.2_376_TPlot.pdf	0	30.281	-Inf	down	3.7368e-08	4.29087e-08	yes	GO:0044424(intracellular part);GO:0005623(cell);GO:0043226(organelle);GO:0043229(intracellular organelle);GO:0005622(intracellular);GO:0044464(cell part);GO:0005694(chromosome);GO:0043228(non-membrane-bounded organelle);GO:0005488(binding);GO:0043232(intracellular non-membrane-bounded organelle)	NA
PC-3p-13278_910	XM_016082657.2	590	611	601	-37	-24.3	0.656757	10	3-6,609-606;7-7,604-604;9-20,602-591	1-2,611-610[UP5];x-x,605-605[BULt];8-8,603-603[SIL];21-21,590-590[UP3]	.((((((((((((.(.((((..&..))))-).)))))))))))).	UCCGAGAGCAGCUCGACCGACG&UUUUGG-CAAGCUGUUCUUGGC	3	99.9134	2	0.999966	Output/S8h/cleaveLand_result/t_plot/PC-3p-13278_910_XM_016082657.2_601_TPlot.pdf	0	0	NA	NA	NA	99.9134	0	Inf	up	1.5881e-23	2.42062e-22	yes	GO:0031323(regulation of cellular metabolic process);GO:0031326(regulation of cellular biosynthetic process);GO:0060255(regulation of macromolecule metabolic process);GO:1901363(heterocyclic compound binding);GO:0080090(regulation of primary metabolic process);GO:0097159(organic cyclic compound binding);GO:0010468(regulation of gene expression);GO:0051252(regulation of RNA metabolic process);GO:2…	ko04626(Plant-pathogen interaction);ko04016(MAPK signaling pathway - plant)
PC-3p-13278_910	XM_016082670.2	831	852	843	-37	-24.9	0.672973	7	1-9,852-844;11-18,842-835;19-21,833-831	10-10,843-843[SIL];x-x,834-834[BULt]	(((.((((((((.(((((((((&))))))))).))))))))-)))	GCUGAGGAACAGGUUGCUGAGA&UUUUGGCAAGCUGUUCUU-GGC	0	0	NA	NA	NA	1	30.281	4	1	Output/S0h/cleaveLand_result/t_plot/PC-3p-13278_910_XM_016082670.2_843_TPlot.pdf	0	30.281	-Inf	down	3.7368e-08	4.29087e-08	yes	GO:0003824(catalytic activity);GO:0015399(primary active transmembrane transporter activity);GO:0005773(vacuole);GO:0016817(hydrolase activity, acting on acid anhydrides);GO:0031090(organelle membrane);GO:0005623(cell);GO:0098805(whole membrane);GO:0043227(membrane-bounded organelle);GO:0016462(pyrophosphatase activity);GO:0005794(Golgi apparatus);GO:0016020(membrane);GO:0043492(ATPase activity, …	ko00190(Oxidative phosphorylation);ko04145(Phagosome);ko01100(Metabolic pathways)
PC-3p-13278_910	XM_016085115.2	1030	1052	1043	-37	-24.9	0.672973	7.5	1-4,1052-1049;6-12,1047-1041;14-17,1039-1036;18-21,1033-1030	5-5,1048-1048[SIL];13-13,1040-1040[SIL];x-x,1035-1034[BULt]	((((..((((.(((((((.((((&)))).))))))).))))--))))	GCCAUUGGAAGAGCUUGUGAAGA&UUUUGGCAAGCUGUUCU--UGGC	1	33.3045	4	1	Output/S8h/cleaveLand_result/t_plot/PC-3p-13278_910_XM_016085115.2_1043_TPlot.pdf	0	0	NA	NA	NA	33.3045	0	Inf	up	7.8779e-09	1.42259e-08	yes	GO:0016491(oxidoreductase activity);GO:0003824(catalytic activity);GO:0008152(metabolic process);GO:0005488(binding);GO:0046872(metal ion binding);GO:0043169(cation binding);GO:0055114(oxidation-reduction process);GO:0043167(ion binding)	ko00940(Phenylpropanoid biosynthesis);ko01110(Biosynthesis of secondary metabolites)
PC-3p-13278_910	XM_016085525.2	188	207	199	-37	-26.2	0.708108	8.5	3-7,205-201;10-21,199-188	1-2,207-206[UP5];8-9,200-200[AILq]	((((((((((((.-(((((..&..)))))..))))))))))))	GCCAGGAACAGCA-GUCAACA&UUUUGGCAAGCUGUUCUUGGC	3	99.9134	2	0.844241	Output/S8h/cleaveLand_result/t_plot/PC-3p-13278_910_XM_016085525.2_199_TPlot.pdf	1	30.281	4	0.996734	Output/S0h/cleaveLand_result/t_plot/PC-3p-13278_910_XM_016085525.2_199_TPlot.pdf	99.9134	30.281	1.72227	up	1.0422e-09	4.10813e-09	yes	GO:0097159(organic cyclic compound binding);GO:0005622(intracellular);GO:0097367(carbohydrate derivative binding);GO:0042026(protein refolding);GO:0006457(protein folding);GO:0000166(nucleotide binding);GO:0036094(small molecule binding);GO:0017076(purine nucleotide binding);GO:0005524(ATP binding);GO:0009987(cellular process);GO:0030554(adenyl nucleotide binding);GO:0044424(intracellular part);G…	ko03018(RNA degradation)
PC-3p-13278_910	XM_016086403.2	330	350	341	-37	-24.8	0.67027	7.5	2-7,349-344;10-12,341-339;14-18,337-333;20-21,331-330	1-1,350-350[UP5];8-9,343-342[SIL];13-13,338-338[SIL];19-19,332-332[SIL]	((.(((((.(((..((((((.&.))))))..))).))))).))	GCGAAGAGGAGCAGGCCAAAG&UUUUGGCAAGCUGUUCUUGGC	0	0	NA	NA	NA	2	60.562	2	0.999295	Output/S0h/cleaveLand_result/t_plot/PC-3p-13278_910_XM_016086403.2_341_TPlot.pdf	0	60.562	-Inf	down	7.123e-15	2.99612e-14	yes	NA	ko00620(Pyruvate metabolism);ko01200(Carbon metabolism);ko00710(Carbon fixation in photosynthetic organisms);ko01100(Metabolic pathways)
PC-3p-13278_910	XM_016086451.2	765	788	779	-37	-25.24	0.682162	11	2-7,787-782;10-16,779-773;18-21,768-765	1-1,788-788[UP5];8-9,781-780[SIL];17-17,772-769[AILt]	((((....(((((((..((((((.&.))))))..)))))))---.))))	GCCACCACGAACGGCGGGCCAAGG&UUUUGGCAAGCUGUUC---UUGGC	6	199.827	3	0.719019	Output/S8h/cleaveLand_result/t_plot/PC-3p-13278_910_XM_016086451.2_779_TPlot.pdf	6	181.686	2	0.99158	Output/S0h/cleaveLand_result/t_plot/PC-3p-13278_910_XM_016086451.2_779_TPlot.pdf	199.827	181.686	0.137303	up	0.35297	0.374478	yes	GO:0043226(organelle);GO:0043231(intracellular membrane-bounded organelle);GO:1901700(response to oxygen-containing compound);GO:0003676(nucleic acid binding);GO:0003700(DNA binding transcription factor activity);GO:0010200(response to chitin);GO:0005623(cell);GO:0010033(response to organic substance);GO:0050896(response to stimulus);GO:0001067(regulatory region nucleic acid binding);GO:0043227(m…	ko04144(Endocytosis)
PC-3p-13278_910	XM_016086676.2	208	226	219	-37	-26	0.702703	8.5	2-7,225-220;10-21,219-208	1-1,226-226[UP5];8-9,x-x[BULq]	((((((((((((--((((((.&.))))))..))))))))))))	GCCAAGGACAGC--GUCAGGC&UUUUGGCAAGCUGUUCUUGGC	1	33.3045	4	0.998511	Output/S8h/cleaveLand_result/t_plot/PC-3p-13278_910_XM_016086676.2_219_TPlot.pdf	2	60.562	3	0.488502	Output/S0h/cleaveLand_result/t_plot/PC-3p-13278_910_XM_016086676.2_219_TPlot.pdf	33.3045	60.562	-0.862697	down	0.0049011	0.0052713	yes	GO:0006605(protein targeting);GO:0015197(peptide transporter activity);GO:0071705(nitrogen compound transport);GO:0046907(intracellular transport);GO:0071702(organic substance transport);GO:0022857(transmembrane transporter activity);GO:0005215(transporter activity);GO:0006886(intracellular protein transport);GO:0045184(establishment of protein localization);GO:0051649(establishment of localizati…	ko04141(Protein processing in endoplasmic reticulum);ko03060(Protein export);ko04145(Phagosome)
PC-3p-13278_910	XM_016086677.2	208	226	219	-37	-26	0.702703	8.5	2-7,225-220;10-21,219-208	1-1,226-226[UP5];8-9,x-x[BULq]	((((((((((((--((((((.&.))))))..))))))))))))	GCCAAGGACAGC--GUCAGGC&UUUUGGCAAGCUGUUCUUGGC	1	33.3045	4	0.998871	Output/S8h/cleaveLand_result/t_plot/PC-3p-13278_910_XM_016086677.2_219_TPlot.pdf	1	30.281	4	0.999202	Output/S0h/cleaveLand_result/t_plot/PC-3p-13278_910_XM_016086677.2_219_TPlot.pdf	33.3045	30.281	0.137303	up	0.70456	0.704918	yes	GO:0006605(protein targeting);GO:0015197(peptide transporter activity);GO:0071705(nitrogen compound transport);GO:0046907(intracellular transport);GO:0071702(organic substance transport);GO:0022857(transmembrane transporter activity);GO:0005215(transporter activity);GO:0006886(intracellular protein transport);GO:0045184(establishment of protein localization);GO:0051649(establishment of localizati…	ko04141(Protein processing in endoplasmic reticulum);ko03060(Protein export);ko04145(Phagosome)
PC-3p-13278_910	XM_016087453.2	1218	1239	1230	-37	-24.4	0.659459	8	2-4,1238-1236;6-9,1234-1231;11-19,1229-1221;20-21,1219-1218	1-1,1239-1239[UP5];5-5,1235-1235[SIL];10-10,1230-1230[SIL];x-x,1220-1220[BULt]	((.(((((((((.((((.(((.&.))).)))).)))))))))-))	GCUCAAGAACAGGUUGUGGAAC&UUUUGGCAAGCUGUUCUUG-GC	0	0	NA	NA	NA	1	30.281	4	1	Output/S0h/cleaveLand_result/t_plot/PC-3p-13278_910_XM_016087453.2_1230_TPlot.pdf	0	30.281	-Inf	down	3.7368e-08	4.29087e-08	yes	NA	ko03440(Homologous recombination)
PC-3p-13278_910	XM_016087940.2	237	257	248	-37	-24.8	0.67027	11.5	5-7,253-251;9-17,249-241;19-21,239-237	1-4,257-254[UP5];8-8,250-250[SIL];18-18,240-240[SIL]	(((.(((((((((.(((....&....))).))))))))).)))	GCUUGGAGCAGCUCGCCGUCG&UUUUGGCAAGCUGUUCUUGGC	0	0	NA	NA	NA	1	30.281	4	1	Output/S0h/cleaveLand_result/t_plot/PC-3p-13278_910_XM_016087940.2_248_TPlot.pdf	0	30.281	-Inf	down	3.7368e-08	4.29087e-08	yes	GO:0005488(binding);GO:0070279(vitamin B6 binding);GO:0044281(small molecule metabolic process);GO:0009987(cellular process);GO:0019752(carboxylic acid metabolic process);GO:0006082(organic acid metabolic process);GO:0016831(carboxy-lyase activity);GO:0043167(ion binding);GO:0030170(pyridoxal phosphate binding);GO:0097159(organic cyclic compound binding);GO:0016829(lyase activity);GO:0036094(smal…	ko00340(Histidine metabolism);ko01100(Metabolic pathways);ko01110(Biosynthesis of secondary metabolites)
PC-3p-13278_910	XM_016088563.2	175	197	188	-37	-24.5	0.662162	10	4-10,194-188;12-17,186-181;18-21,178-175	1-3,197-195[UP5];11-11,187-187[SIL];x-x,180-179[BULt]	((((..((((((.(((((((...&...))))))).))))))--))))	GCCACUGGAGCAACUUGCCACAA&UUUUGGCAAGCUGUUCU--UGGC	0	0	NA	NA	NA	1	30.281	4	1	Output/S0h/cleaveLand_result/t_plot/PC-3p-13278_910_XM_016088563.2_188_TPlot.pdf	0	30.281	-Inf	down	3.7368e-08	4.29087e-08	yes	GO:0044446(intracellular organelle part);GO:0022607(cellular component assembly);GO:0051641(cellular localization);GO:0043933(macromolecular complex subunit organization);GO:0051649(establishment of localization in cell);GO:0007010(cytoskeleton organization);GO:0016020(membrane);GO:0031975(envelope);GO:0071822(protein complex subunit organization);GO:0007017(microtubule-based process);GO:0051179(…	ko03013(RNA transport)
PC-3p-13278_910	XM_016089500.2	632	653	644	-37	-24.9	0.672973	11	5-10,649-644;11-19,642-634	1-4,653-650[UP5];x-x,643-643[BULt];20-21,633-632[UP3]	..(((((((((.((((((....&....))))))-)))))))))..	CACAAGAACAGACUUGCCUCCU&UUUUGGCAAG-CUGUUCUUGGC	1	33.3045	4	1	Output/S8h/cleaveLand_result/t_plot/PC-3p-13278_910_XM_016089500.2_644_TPlot.pdf	2	60.562	3	0.846707	Output/S0h/cleaveLand_result/t_plot/PC-3p-13278_910_XM_016089500.2_644_TPlot.pdf	33.3045	60.562	-0.862697	down	0.0049011	0.0052713	yes	GO:0098869(cellular oxidant detoxification);GO:0043167(ion binding);GO:0044237(cellular metabolic process);GO:0044248(cellular catabolic process);GO:0072593(reactive oxygen species metabolic process);GO:0009987(cellular process);GO:0050896(response to stimulus);GO:0006950(response to stress);GO:0042744(hydrogen peroxide catabolic process);GO:0005488(binding);GO:0042743(hydrogen peroxide metabolic…	ko00940(Phenylpropanoid biosynthesis);ko01110(Biosynthesis of secondary metabolites);ko01100(Metabolic pathways)
PC-3p-13278_910	XM_016089533.2	1040	1061	1051	-37	-25.4	0.686486	10.5	3-9,1059-1053;12-21,1049-1040	1-2,1061-1060[UP5];10-11,1052-1050[AILt]	((((((((((...(((((((..&..)))))))-..))))))))))	GCCAAGAGCAUUGUUGCCAGCG&UUUUGGCAA-GCUGUUCUUGGC	1	33.3045	4	0.999992	Output/S8h/cleaveLand_result/t_plot/PC-3p-13278_910_XM_016089533.2_1051_TPlot.pdf	1	30.281	4	0.999996	Output/S0h/cleaveLand_result/t_plot/PC-3p-13278_910_XM_016089533.2_1051_TPlot.pdf	33.3045	30.281	0.137303	up	0.70456	0.704918	yes	GO:0035639(purine ribonucleoside triphosphate binding);GO:0032553(ribonucleotide binding);GO:0071704(organic substance metabolic process);GO:0044272(sulfur compound biosynthetic process);GO:0004478(methionine adenosyltransferase activity);GO:0006730(one-carbon metabolic process);GO:0044249(cellular biosynthetic process);GO:0003824(catalytic activity);GO:0046872(metal ion binding);GO:0097367(carbo…	ko00270(Cysteine and methionine metabolism);ko01100(Metabolic pathways);ko01110(Biosynthesis of secondary metabolites);ko01230(Biosynthesis of amino acids)
PC-3p-13278_910	XM_016089706.2	1122	1141	1132	-37	-25.1	0.678378	8	2-4,1140-1138;6-17,1136-1125;19-21,1124-1122	1-1,1141-1141[UP5];5-5,1137-1137[SIL];18-18,x-x[BULq]	(((-((((((((((((.(((.&.))).)))))))))))).)))	GCC-AGAACAGUUUGUGGAGC&UUUUGGCAAGCUGUUCUUGGC	1	33.3045	4	1	Output/S8h/cleaveLand_result/t_plot/PC-3p-13278_910_XM_016089706.2_1132_TPlot.pdf	0	0	NA	NA	NA	33.3045	0	Inf	up	7.8779e-09	1.42259e-08	yes	GO:0016788(hydrolase activity, acting on ester bonds);GO:0006796(phosphate-containing compound metabolic process);GO:0003824(catalytic activity);GO:0044237(cellular metabolic process);GO:0008252(nucleotidase activity);GO:0016791(phosphatase activity);GO:0006793(phosphorus metabolic process);GO:0016787(hydrolase activity);GO:0042578(phosphoric ester hydrolase activity);GO:0008253(5'-nucleotidase a…	ko01110(Biosynthesis of secondary metabolites);ko00230(Purine metabolism);ko00760(Nicotinate and nicotinamide metabolism);ko01100(Metabolic pathways);ko00240(Pyrimidine metabolism)
PC-3p-13278_910	XM_016091084.2	1198	1224	1214	-37	-24.6	0.664865	10.5	1-8,1224-1217;9-13,1215-1211;14-21,1205-1198	x-x,1216-1216[BULt];x-x,1210-1206[BULt]	((((((((.....(((((.((((((((&))))))))-)))))-----))))))))	GCCAGGAAGUUCUCAGCUCUGCUGAGA&UUUUGGCA-AGCUG-----UUCUUGGC	0	0	NA	NA	NA	1	30.281	4	1	Output/S0h/cleaveLand_result/t_plot/PC-3p-13278_910_XM_016091084.2_1214_TPlot.pdf	0	30.281	-Inf	down	3.7368e-08	4.29087e-08	yes	GO:0044464(cell part);GO:0003824(catalytic activity);GO:0005622(intracellular);GO:0000151(ubiquitin ligase complex);GO:0004842(ubiquitin-protein transferase activity);GO:1902494(catalytic complex);GO:1990234(transferase complex);GO:0019787(ubiquitin-like protein transferase activity);GO:0016740(transferase activity);GO:0044424(intracellular part);GO:0031463(Cul3-RING ubiquitin ligase complex);GO:…	NA
PC-3p-13278_910	XM_016091402.2	2147	2169	2159	-37	-25.1	0.678378	9	2-7,2168-2163;8-14,2161-2155;16-21,2152-2147	1-1,2169-2169[UP5];x-x,2162-2162[BULt];15-15,2154-2153[AILt]	((((((..(((((((.((((((.&.))))))-)))))))-.))))))	GCCAGGUUGCAGCUUGGUCGAGU&UUUUGGC-AAGCUGU-UCUUGGC	1	33.3045	4	1	Output/S8h/cleaveLand_result/t_plot/PC-3p-13278_910_XM_016091402.2_2159_TPlot.pdf	0	0	NA	NA	NA	33.3045	0	Inf	up	7.8779e-09	1.42259e-08	yes	GO:0043169(cation binding);GO:0043167(ion binding);GO:0008270(zinc ion binding);GO:0046872(metal ion binding);GO:0005488(binding);GO:0046914(transition metal ion binding)	NA
PC-3p-13278_910	XM_016091448.2	1032	1054	1045	-37	-24.3	0.656757	10	2-12,1053-1043;13-20,1040-1033	1-1,1054-1054[UP5];x-x,1042-1041[BULt];21-21,1032-1032[UP3]	.((((((((..(((((((((((.&.)))))))))))--)))))))).	UCCGAGAAUUAGGCUUGUCAGAU&UUUUGGCAAGCU--GUUCUUGGC	0	0	NA	NA	NA	1	30.281	4	1	Output/S0h/cleaveLand_result/t_plot/PC-3p-13278_910_XM_016091448.2_1045_TPlot.pdf	0	30.281	-Inf	down	3.7368e-08	4.29087e-08	yes	GO:0043226(organelle);GO:0043231(intracellular membrane-bounded organelle);GO:1901363(heterocyclic compound binding);GO:0005623(cell);GO:0050789(regulation of biological process);GO:0003676(nucleic acid binding);GO:0010468(regulation of gene expression);GO:0005739(mitochondrion);GO:0044424(intracellular part);GO:0060255(regulation of macromolecule metabolic process);GO:0031323(regulation of cellu…	NA
PC-3p-13278_910	XM_016091541.2	140	163	151	-37	-24.7	0.667568	11	2-8,162-156;9-12,152-149;14-20,147-141	1-1,163-163[UP5];x-x,155-153[BULt];13-13,148-148[SIL];21-21,140-140[UP3]	.(((((((.((((...(((((((.&.)))))))---)))).))))))).	CCCAAGAAGAGCUUCUUGCCGAGC&UUUUGGCA---AGCUGUUCUUGGC	0	0	NA	NA	NA	3	90.843	3	0.898459	Output/S0h/cleaveLand_result/t_plot/PC-3p-13278_910_XM_016091541.2_151_TPlot.pdf	0	90.843	-Inf	down	1.5521e-21	1.73737e-20	yes	NA	NA
PC-3p-13278_910	XM_016092520.2	1305	1331	1322	-37	-26.4	0.713514	13	4-14,1328-1318;15-21,1311-1305	1-3,1331-1329[UP5];x-x,1317-1312[BULt]	(((((((......(((((((((((...&...)))))))))))------)))))))	GCCAAGAAGUGCAACGGUUUGCCAUUA&UUUUGGCAAGCUGU------UCUUGGC	0	0	NA	NA	NA	1	30.281	4	0.992695	Output/S0h/cleaveLand_result/t_plot/PC-3p-13278_910_XM_016092520.2_1322_TPlot.pdf	0	30.281	-Inf	down	3.7368e-08	4.29087e-08	yes	NA	NA
PC-3p-13278_910	XM_016094590.2	5090	5118	5101	-37	-24.8	0.67027	18.5	1-9,5118-5110;10-19,5101-5092	x-x,5109-5102[BULt];20-21,5091-5090[UP3]	..((((((((((........(((((((((&)))))))))--------))))))))))..	AACAAGAGCAGCAGCAAGUAUUGCCAAAA&UUUUGGCAA--------GCUGUUCUUGGC	2	66.6089	3	0.858178	Output/S8h/cleaveLand_result/t_plot/PC-3p-13278_910_XM_016094590.2_5101_TPlot.pdf	0	0	NA	NA	NA	66.6089	0	Inf	up	3.3071e-16	2.0359e-15	yes	GO:0070887(cellular response to chemical stimulus);GO:0071365(cellular response to auxin stimulus);GO:1901363(heterocyclic compound binding);GO:0005634(nucleus);GO:0051716(cellular response to stimulus);GO:0060255(regulation of macromolecule metabolic process);GO:0031326(regulation of cellular biosynthetic process);GO:0042221(response to chemical);GO:0051252(regulation of RNA metabolic process);G…	ko04075(Plant hormone signal transduction)
PC-3p-13278_910	XM_016095043.2	64	87	75	-37	-24.82	0.670811	18.5	5-7,83-81;10-21,75-64	1-4,87-84[UP5];8-9,80-76[AILt]	((((((((((((.....(((....&....)))---..))))))))))))	GCCAAGGACAGCGUAAGGCUCGUC&UUUUGGC---AAGCUGUUCUUGGC	3	99.9134	2	0.998419	Output/S8h/cleaveLand_result/t_plot/PC-3p-13278_910_XM_016095043.2_75_TPlot.pdf	1	30.281	4	1	Output/S0h/cleaveLand_result/t_plot/PC-3p-13278_910_XM_016095043.2_75_TPlot.pdf	99.9134	30.281	1.72227	up	1.0422e-09	4.10813e-09	yes	GO:1904680(peptide transmembrane transporter activity);GO:0070727(cellular macromolecule localization);GO:0005623(cell);GO:0071702(organic substance transport);GO:0022884(macromolecule transmembrane transporter activity);GO:0034613(cellular protein localization);GO:0071705(nitrogen compound transport);GO:0005215(transporter activity);GO:0015399(primary active transmembrane transporter activity);G…	ko04145(Phagosome);ko03060(Protein export);ko04141(Protein processing in endoplasmic reticulum)
PC-3p-13278_910	XM_016095044.2	64	87	75	-37	-24.82	0.670811	18.5	5-7,83-81;10-21,75-64	1-4,87-84[UP5];8-9,80-76[AILt]	((((((((((((.....(((....&....)))---..))))))))))))	GCCAAGGACAGCGUAAGGCUCGUC&UUUUGGC---AAGCUGUUCUUGGC	1	33.3045	4	1	Output/S8h/cleaveLand_result/t_plot/PC-3p-13278_910_XM_016095044.2_75_TPlot.pdf	1	30.281	4	1	Output/S0h/cleaveLand_result/t_plot/PC-3p-13278_910_XM_016095044.2_75_TPlot.pdf	33.3045	30.281	0.137303	up	0.70456	0.704918	yes	GO:1904680(peptide transmembrane transporter activity);GO:0070727(cellular macromolecule localization);GO:0005623(cell);GO:0071702(organic substance transport);GO:0022884(macromolecule transmembrane transporter activity);GO:0034613(cellular protein localization);GO:0071705(nitrogen compound transport);GO:0005215(transporter activity);GO:0015399(primary active transmembrane transporter activity);G…	ko04145(Phagosome);ko03060(Protein export);ko04141(Protein processing in endoplasmic reticulum)
PC-3p-13278_910	XM_016095558.2	1381	1402	1394	-37	-25.3	0.683784	8	1-7,1402-1396;10-18,1394-1386;19-21,1383-1381	8-9,1395-1395[AILq];x-x,1385-1384[BULt]	(((..(((((((((.-(((((((&)))))))..)))))))))--)))	GCCUCAAGAACAGUG-GCCAGAA&UUUUGGCAAGCUGUUCUU--GGC	2	66.6089	2	0.984869	Output/S8h/cleaveLand_result/t_plot/PC-3p-13278_910_XM_016095558.2_1394_TPlot.pdf	0	0	NA	NA	NA	66.6089	0	Inf	up	3.3071e-16	2.0359e-15	yes	GO:0016787(hydrolase activity);GO:0003824(catalytic activity);GO:0008152(metabolic process)	ko04075(Plant hormone signal transduction)
PC-3p-13278_910	XM_016096284.2	2762	2783	2774	-37	-25.7	0.694595	10	5-14,2779-2770;17-21,2766-2762	1-4,2783-2780[UP5];15-16,2769-2767[AILt]	(((((...((((((((((....&....))))))))))-..)))))	GCCAAAUUACAGCUUGCCUCCC&UUUUGGCAAGCUGU-UCUUGGC	1	33.3045	4	0.999896	Output/S8h/cleaveLand_result/t_plot/PC-3p-13278_910_XM_016096284.2_2774_TPlot.pdf	0	0	NA	NA	NA	33.3045	0	Inf	up	7.8779e-09	1.42259e-08	yes	GO:0004553(hydrolase activity, hydrolyzing O-glycosyl compounds);GO:0005488(binding);GO:0043170(macromolecule metabolic process);GO:0004559(alpha-mannosidase activity);GO:0006013(mannose metabolic process);GO:0019318(hexose metabolic process);GO:0044267(cellular protein metabolic process);GO:1901135(carbohydrate derivative metabolic process);GO:0015923(mannosidase activity);GO:0019538(protein met…	ko00511(Other glycan degradation)
PC-3p-13278_910	XM_016096582.2	1606	1630	1617	-37	-24.16	0.652973	16	2-7,1629-1624;10-12,1617-1615;14-21,1613-1606	1-1,1630-1630[UP5];8-9,1623-1618[AILt];13-13,1614-1614[SIL]	((((((((.(((......((((((.&.))))))----..))).))))))))	GCCAAGAAGAGUGAUACGGCCAAGU&UUUUGGC----AAGCUGUUCUUGGC	1	33.3045	4	1	Output/S8h/cleaveLand_result/t_plot/PC-3p-13278_910_XM_016096582.2_1617_TPlot.pdf	0	0	NA	NA	NA	33.3045	0	Inf	up	7.8779e-09	1.42259e-08	yes	GO:0036094(small molecule binding);GO:0070279(vitamin B6 binding);GO:1901566(organonitrogen compound biosynthetic process);GO:0006782(protoporphyrinogen IX biosynthetic process);GO:1901360(organic cyclic compound metabolic process);GO:0016869(intramolecular transferase activity, transferring amino groups);GO:0008152(metabolic process);GO:0006725(cellular aromatic compound metabolic process);GO:00…	ko00860(Porphyrin and chlorophyll metabolism);ko01110(Biosynthesis of secondary metabolites);ko01100(Metabolic pathways)
PC-3p-13278_910	XM_016097798.2	549	567	558	-37	-24.6	0.664865	5	1-14,567-554;18-21,552-549	15-17,553-553[AILq]	((((.--((((((((((((((&))))))))))))))...))))	GCCAC--ACAGCUUGUCGAAA&UUUUGGCAAGCUGUUCUUGGC	1	33.3045	4	1	Output/S8h/cleaveLand_result/t_plot/PC-3p-13278_910_XM_016097798.2_558_TPlot.pdf	0	0	NA	NA	NA	33.3045	0	Inf	up	7.8779e-09	1.42259e-08	yes	GO:0005829(cytosol);GO:0016877(ligase activity, forming carbon-sulfur bonds);GO:0005622(intracellular);GO:1901564(organonitrogen compound metabolic process);GO:0044238(primary metabolic process);GO:0008641(ubiquitin-like modifier activating enzyme activity);GO:0044424(intracellular part);GO:0019781(NEDD8 activating enzyme activity);GO:0044260(cellular macromolecule metabolic process);GO:0005634(n…	NA
PC-3p-13278_910	XM_016097800.2	548	566	557	-37	-24.6	0.664865	5	1-14,566-553;18-21,551-548	15-17,552-552[AILq]	((((.--((((((((((((((&))))))))))))))...))))	GCCAC--ACAGCUUGUCGAAA&UUUUGGCAAGCUGUUCUUGGC	1	33.3045	4	1	Output/S8h/cleaveLand_result/t_plot/PC-3p-13278_910_XM_016097800.2_557_TPlot.pdf	0	0	NA	NA	NA	33.3045	0	Inf	up	7.8779e-09	1.42259e-08	yes	GO:0005829(cytosol);GO:0016877(ligase activity, forming carbon-sulfur bonds);GO:0005622(intracellular);GO:1901564(organonitrogen compound metabolic process);GO:0044238(primary metabolic process);GO:0008641(ubiquitin-like modifier activating enzyme activity);GO:0044424(intracellular part);GO:0019781(NEDD8 activating enzyme activity);GO:0044260(cellular macromolecule metabolic process);GO:0005634(n…	NA
PC-3p-13278_910	XM_016098826.2	1174	1195	1186	-37	-24.2	0.654054	12	5-11,1191-1185;12-17,1183-1178;19-21,1176-1174	1-4,1195-1192[UP5];x-x,1184-1184[BULt];18-18,1177-1177[SIL]	(((.((((((.(((((((....&....)))))))-)))))).)))	GCUCAGAGCGUGCUUGCCUUCC&UUUUGGCAAGC-UGUUCUUGGC	0	0	NA	NA	NA	1	30.281	4	1	Output/S0h/cleaveLand_result/t_plot/PC-3p-13278_910_XM_016098826.2_1186_TPlot.pdf	0	30.281	-Inf	down	3.7368e-08	4.29087e-08	yes	GO:0016020(membrane);GO:0044425(membrane part);GO:0031224(intrinsic component of membrane);GO:0016021(integral component of membrane)	ko04626(Plant-pathogen interaction);ko04016(MAPK signaling pathway - plant);ko03010(Ribosome)
PC-3p-13278_910	XM_016100066.2	368	395	386	-37	-24.9	0.672973	16.5	6-14,390-382;15-21,374-368	1-5,395-391[UP5];x-x,381-375[BULt]	(((((((.......(((((((((.....&.....)))))))))-------)))))))	GCCAGGAACCAUGGACAGCUUGCGUUCU&UUUUGGCAAGCUGU-------UCUUGGC	0	0	NA	NA	NA	1	30.281	4	1	Output/S0h/cleaveLand_result/t_plot/PC-3p-13278_910_XM_016100066.2_386_TPlot.pdf	0	30.281	-Inf	down	3.7368e-08	4.29087e-08	yes	GO:0044464(cell part);GO:0015630(microtubule cytoskeleton);GO:0099080(supramolecular complex);GO:0032553(ribonucleotide binding);GO:0005737(cytoplasm);GO:1901265(nucleoside phosphate binding);GO:0044446(intracellular organelle part);GO:0043168(anion binding);GO:0099081(supramolecular polymer);GO:0019001(guanyl nucleotide binding);GO:0009987(cellular process);GO:0005525(GTP binding);GO:0099513(pol…	ko04145(Phagosome)
PC-3p-13278_910	XM_016100819.2	690	710	701	-37	-26.5	0.716216	10	5-12,706-699;14-20,697-691	1-4,710-707[UP5];13-13,698-698[SIL];21-21,690-690[UP3]	.(((((((.((((((((....&....)))))))).))))))).	CCCAGGAGGAGCUUGCCCCAA&UUUUGGCAAGCUGUUCUUGGC	0	0	NA	NA	NA	1	30.281	4	0.991067	Output/S0h/cleaveLand_result/t_plot/PC-3p-13278_910_XM_016100819.2_701_TPlot.pdf	0	30.281	-Inf	down	3.7368e-08	4.29087e-08	yes	NA	NA
PC-3p-13278_910	XM_016100820.2	668	688	679	-37	-26.5	0.716216	10	5-12,684-677;14-20,675-669	1-4,688-685[UP5];13-13,676-676[SIL];21-21,668-668[UP3]	.(((((((.((((((((....&....)))))))).))))))).	CCCAGGAGGAGCUUGCCCCAA&UUUUGGCAAGCUGUUCUUGGC	0	0	NA	NA	NA	1	30.281	4	0.991646	Output/S0h/cleaveLand_result/t_plot/PC-3p-13278_910_XM_016100820.2_679_TPlot.pdf	0	30.281	-Inf	down	3.7368e-08	4.29087e-08	yes	NA	NA
PC-3p-13278_910	XM_016100929.2	1253	1273	1264	-37	-25.8	0.697297	12	6-21,1268-1253	1-5,1273-1269[UP5]	((((((((((((((((.....&.....))))))))))))))))	GCUGAGGGCAGCUUGUAAUGC&UUUUGGCAAGCUGUUCUUGGC	1	33.3045	4	0.999602	Output/S8h/cleaveLand_result/t_plot/PC-3p-13278_910_XM_016100929.2_1264_TPlot.pdf	0	0	NA	NA	NA	33.3045	0	Inf	up	7.8779e-09	1.42259e-08	yes	GO:0001883(purine nucleoside binding);GO:0036094(small molecule binding);GO:0032553(ribonucleotide binding);GO:0017111(nucleoside-triphosphatase activity);GO:0003824(catalytic activity);GO:0005525(GTP binding);GO:0032549(ribonucleoside binding);GO:0097159(organic cyclic compound binding);GO:0016818(hydrolase activity, acting on acid anhydrides, in phosphorus-containing anhydrides);GO:0032550(puri…	NA
PC-3p-13278_910	XM_016101909.2	457	478	469	-37	-25.6	0.691892	8.5	3-8,476-471;10-17,469-462;18-21,460-457	1-2,478-477[UP5];9-9,470-470[SIL];x-x,461-461[BULt]	((((.((((((((.((((((..&..)))))).))))))))-))))	GCCAGAGAGCAGCGUGUCGACG&UUUUGGCAAGCUGUUCU-UGGC	0	0	NA	NA	NA	1	30.281	4	0.999979	Output/S0h/cleaveLand_result/t_plot/PC-3p-13278_910_XM_016101909.2_469_TPlot.pdf	0	30.281	-Inf	down	3.7368e-08	4.29087e-08	yes	GO:0009987(cellular process);GO:0006048(UDP-N-acetylglucosamine biosynthetic process);GO:1901135(carbohydrate derivative metabolic process);GO:0071704(organic substance metabolic process);GO:0044249(cellular biosynthetic process);GO:1901360(organic cyclic compound metabolic process);GO:0044464(cell part);GO:0008152(metabolic process);GO:0006725(cellular aromatic compound metabolic process);GO:000…	ko01100(Metabolic pathways);ko00520(Amino sugar and nucleotide sugar metabolism)
PC-3p-13278_910	XM_016102072.2	2196	2218	2209	-37	-24.1	0.651351	10	1-12,2218-2207;13-20,2204-2197	x-x,2206-2205[BULt];21-21,2196-2196[UP3]	.((((((((..((((((((((((&))))))))))))--)))))))).	ACUGAGAACCAGGUUUGCCAGGA&UUUUGGCAAGCU--GUUCUUGGC	1	33.3045	4	1	Output/S8h/cleaveLand_result/t_plot/PC-3p-13278_910_XM_016102072.2_2209_TPlot.pdf	0	0	NA	NA	NA	33.3045	0	Inf	up	7.8779e-09	1.42259e-08	yes	NA	NA
PC-3p-13278_910	XM_016102397.2	1327	1347	1338	-37	-25.4	0.686486	7	2-5,1346-1343;7-16,1341-1332;18-21,1330-1327	1-1,1347-1347[UP5];6-6,1342-1342[SIL];17-17,1331-1331[SIL]	((((.((((((((((.((((.&.)))).)))))))))).))))	GUCGCGAACAGCUUGGCGGAU&UUUUGGCAAGCUGUUCUUGGC	0	0	NA	NA	NA	1	30.281	4	0.999996	Output/S0h/cleaveLand_result/t_plot/PC-3p-13278_910_XM_016102397.2_1338_TPlot.pdf	0	30.281	-Inf	down	3.7368e-08	4.29087e-08	yes	GO:2000112(regulation of cellular macromolecule biosynthetic process);GO:1903506(regulation of nucleic acid-templated transcription);GO:0009867(jasmonic acid mediated signaling pathway);GO:0031323(regulation of cellular metabolic process);GO:0097305(response to alcohol);GO:2000241(regulation of reproductive process);GO:0065007(biological regulation);GO:0009968(negative regulation of signal transd…	ko04075(Plant hormone signal transduction)
PC-3p-13278_910	XM_016103216.2	1014	1040	1029	-37	-24.18	0.653514	14.5	1-7,1040-1034;10-14,1029-1025;15-21,1020-1014	8-9,1033-1030[AILt];x-x,1024-1021[BULt]	(((((((....(((((....(((((((&)))))))--..)))))----)))))))	GCCAGGAAUGCGCAGCAGCAGCCAGAG&UUUUGGC--AAGCUGU----UCUUGGC	0	0	NA	NA	NA	1	30.281	4	1	Output/S0h/cleaveLand_result/t_plot/PC-3p-13278_910_XM_016103216.2_1029_TPlot.pdf	0	30.281	-Inf	down	3.7368e-08	4.29087e-08	yes	NA	NA
PC-3p-13278_910	XM_016103249.2	2091	2110	2101	-37	-27.6	0.745946	7	4-14,2107-2097;16-20,2096-2092	1-3,2110-2108[UP5];15-15,x-x[BULq];21-21,2091-2091[UP3]	.(((((-(((((((((((...&...))))))))))).))))).	CCCAAG-ACAGCUUGCCAUCA&UUUUGGCAAGCUGUUCUUGGC	1	33.3045	4	0.858739	Output/S8h/cleaveLand_result/t_plot/PC-3p-13278_910_XM_016103249.2_2101_TPlot.pdf	0	0	NA	NA	NA	33.3045	0	Inf	up	7.8779e-09	1.42259e-08	yes	GO:0097159(organic cyclic compound binding);GO:0044464(cell part);GO:0003677(DNA binding);GO:0043227(membrane-bounded organelle);GO:0016020(membrane);GO:0005622(intracellular);GO:0043226(organelle);GO:1901363(heterocyclic compound binding);GO:0005623(cell);GO:0043231(intracellular membrane-bounded organelle);GO:0043229(intracellular organelle);GO:0003676(nucleic acid binding);GO:0005634(nucleus);…	ko04075(Plant hormone signal transduction)
PC-3p-13278_910	XM_016103323.2	1113	1134	1125	-37	-24.8	0.67027	5.5	2-6,1133-1129;8-19,1127-1116;20-21,1114-1113	1-1,1134-1134[UP5];7-7,1128-1128[SIL];x-x,1115-1115[BULt]	((.((((((((((((.(((((.&.))))).))))))))))))-))	GCACAAGAGCAGCUUAUCAAAU&UUUUGGCAAGCUGUUCUUG-GC	0	0	NA	NA	NA	2	60.562	2	0.999588	Output/S0h/cleaveLand_result/t_plot/PC-3p-13278_910_XM_016103323.2_1125_TPlot.pdf	0	60.562	-Inf	down	7.123e-15	2.99612e-14	yes	GO:1903506(regulation of nucleic acid-templated transcription);GO:0097159(organic cyclic compound binding);GO:0050794(regulation of cellular process);GO:0031326(regulation of cellular biosynthetic process);GO:2000112(regulation of cellular macromolecule biosynthetic process);GO:0006355(regulation of transcription, DNA-templated);GO:0080090(regulation of primary metabolic process);GO:0060255(regul…	ko04141(Protein processing in endoplasmic reticulum);ko04016(MAPK signaling pathway - plant)
PC-3p-13278_910	XM_016103363.2	2655	2674	2666	-37	-25.6	0.691892	9.5	3-7,2672-2668;10-21,2666-2655	1-2,2674-2673[UP5];8-9,2667-2667[AILq]	((((((((((((.-(((((..&..)))))..))))))))))))	GCCAAGAAUGGUG-GCCAAUU&UUUUGGCAAGCUGUUCUUGGC	1	33.3045	4	0.999945	Output/S8h/cleaveLand_result/t_plot/PC-3p-13278_910_XM_016103363.2_2666_TPlot.pdf	2	60.562	2	0.971005	Output/S0h/cleaveLand_result/t_plot/PC-3p-13278_910_XM_016103363.2_2666_TPlot.pdf	33.3045	60.562	-0.862697	down	0.0049011	0.0052713	yes	GO:0036094(small molecule binding);GO:0005488(binding);GO:1901265(nucleoside phosphate binding);GO:0003723(RNA binding);GO:0000166(nucleotide binding);GO:0097159(organic cyclic compound binding);GO:0003676(nucleic acid binding);GO:1901363(heterocyclic compound binding)	NA
PC-3p-13278_910	XM_016105937.2	1288	1310	1299	-37	-24.68	0.667027	11	1-7,1310-1304;10-19,1299-1290	8-9,1303-1300[AILt];20-21,1289-1288[UP3]	..((((((((((....(((((((&)))))))--..))))))))))..	UACAAGAACAGCAGAGGCCGAAA&UUUUGGC--AAGCUGUUCUUGGC	1	33.3045	4	1	Output/S8h/cleaveLand_result/t_plot/PC-3p-13278_910_XM_016105937.2_1299_TPlot.pdf	0	0	NA	NA	NA	33.3045	0	Inf	up	7.8779e-09	1.42259e-08	yes	GO:0016021(integral component of membrane);GO:0016020(membrane);GO:0043167(ion binding);GO:0031224(intrinsic component of membrane);GO:0044425(membrane part);GO:0046872(metal ion binding);GO:0005488(binding);GO:0008270(zinc ion binding);GO:0046914(transition metal ion binding);GO:0043169(cation binding)	ko04141(Protein processing in endoplasmic reticulum);ko04120(Ubiquitin mediated proteolysis)
PC-3p-13278_910	XM_016106734.2	2236	2255	2247	-37	-24.1	0.651351	8	3-5,2253-2251;7-8,2249-2248;10-12,2247-2245;14-21,2243-2236	1-2,2255-2254[UP5];6-6,2250-2250[SIL];9-9,x-x[BULq];13-13,2244-2244[SIL]	((((((((.(((-((.(((..&..))).)).))).))))))))	GCCAAGAAGAGC-UGGCAACC&UUUUGGCAAGCUGUUCUUGGC	0	0	NA	NA	NA	2	60.562	2	0.999995	Output/S0h/cleaveLand_result/t_plot/PC-3p-13278_910_XM_016106734.2_2247_TPlot.pdf	0	60.562	-Inf	down	7.123e-15	2.99612e-14	yes	GO:0016020(membrane)	ko00600(Sphingolipid metabolism);ko01100(Metabolic pathways)
PC-3p-13278_910	XM_016108263.2	529	550	540	-37	-25.1	0.678378	7.5	1-7,550-544;9-12,541-538;14-21,536-529	8-8,543-542[AILt];13-13,537-537[SIL]	((((((((.((((..(((((((&)))))))-.)))).))))))))	GCCGGGAAAAGCUCAGCCAGAG&UUUUGGC-AAGCUGUUCUUGGC	3	99.9134	2	0.994447	Output/S8h/cleaveLand_result/t_plot/PC-3p-13278_910_XM_016108263.2_540_TPlot.pdf	0	0	NA	NA	NA	99.9134	0	Inf	up	1.5881e-23	2.42062e-22	yes	NA	ko04075(Plant hormone signal transduction);ko01100(Metabolic pathways);ko01230(Biosynthesis of amino acids);ko01110(Biosynthesis of secondary metabolites);ko00020(Citrate cycle (TCA cycle));ko00630(Glyoxylate and dicarboxylate metabolism);ko01210(2-Oxocarboxylic acid metabolism);ko01200(Carbon metabolism);ko04016(MAPK signaling pathway - plant)
PC-3p-13278_910	XM_016108560.2	923	949	940	-37	-25.4	0.686486	15	6-17,944-933;18-21,926-923	1-5,949-945[UP5];x-x,932-927[BULt]	((((......((((((((((((.....&.....))))))))))))------))))	GCCAACCUGAAGAACAGCUUGCAACUU&UUUUGGCAAGCUGUUCU------UGGC	1	33.3045	4	0.999994	Output/S8h/cleaveLand_result/t_plot/PC-3p-13278_910_XM_016108560.2_940_TPlot.pdf	0	0	NA	NA	NA	33.3045	0	Inf	up	7.8779e-09	1.42259e-08	yes	GO:0003824(catalytic activity)	NA
PC-3p-13278_910	XM_016109018.2	1085	1107	1096	-37	-25.4	0.686486	12.5	4-6,1104-1102;8-21,1098-1085	1-3,1107-1105[UP5];7-7,1101-1099[AILt]	((((((((((((((...(((...&...)))--.))))))))))))))	GCCAAGGACGGCUUUCUCCACCG&UUUUGG--CAAGCUGUUCUUGGC	1	33.3045	4	0.99999	Output/S8h/cleaveLand_result/t_plot/PC-3p-13278_910_XM_016109018.2_1096_TPlot.pdf	0	0	NA	NA	NA	33.3045	0	Inf	up	7.8779e-09	1.42259e-08	yes	GO:0098754(detoxification);GO:0016684(oxidoreductase activity, acting on peroxide as acceptor);GO:0005509(calcium ion binding);GO:0008152(metabolic process);GO:0003824(catalytic activity);GO:0098869(cellular oxidant detoxification);GO:0046872(metal ion binding);GO:0016209(antioxidant activity);GO:0016174(NAD(P)H oxidase activity);GO:0044425(membrane part);GO:0016651(oxidoreductase activity, actin…	ko04626(Plant-pathogen interaction);ko04016(MAPK signaling pathway - plant)
PC-3p-13278_910	XM_016109552.2	1126	1146	1137	-37	-24.7	0.667568	7.5	1-5,1146-1142;7-17,1140-1130;19-21,1128-1126	6-6,1141-1141[SIL];18-18,1129-1129[SIL]	(((.(((((((((((.(((((&))))).))))))))))).)))	GCUUAGAACGGUUUGGCGAGA&UUUUGGCAAGCUGUUCUUGGC	1	33.3045	4	1	Output/S8h/cleaveLand_result/t_plot/PC-3p-13278_910_XM_016109552.2_1137_TPlot.pdf	0	0	NA	NA	NA	33.3045	0	Inf	up	7.8779e-09	1.42259e-08	yes	GO:0046483(heterocycle metabolic process);GO:0030554(adenyl nucleotide binding);GO:0009987(cellular process);GO:0044424(intracellular part);GO:0048731(system development);GO:0035670(plant-type ovary development);GO:0048437(floral organ development);GO:0043227(membrane-bounded organelle);GO:0048438(floral whorl development);GO:0097367(carbohydrate derivative binding);GO:0022414(reproductive proces…	ko00970(Aminoacyl-tRNA biosynthesis)
PC-3p-13278_910	XM_016109773.2	1081	1106	1097	-37	-29.6	0.8	10.5	4-14,1103-1093;15-21,1087-1081	1-3,1106-1104[UP5];x-x,1092-1088[BULt]	(((((((.....(((((((((((...&...)))))))))))-----)))))))	GCCGAGAUAAGAACAGCUUGCCAUAG&UUUUGGCAAGCUGU-----UCUUGGC	1	33.3045	4	0.386937	Output/S8h/cleaveLand_result/t_plot/PC-3p-13278_910_XM_016109773.2_1097_TPlot.pdf	0	0	NA	NA	NA	33.3045	0	Inf	up	7.8779e-09	1.42259e-08	yes	GO:0016020(membrane)	NA
PC-3p-13278_910	XM_016111091.2	608	630	621	-37	-24.2	0.654054	9.5	1-12,630-619;13-15,616-614;18-21,611-608	x-x,618-617[BULt];16-17,613-612[SIL]	((((..(((..((((((((((((&))))))))))))--)))..))))	GCCGUCGGCGAGGCUUGCCAGAA&UUUUGGCAAGCU--GUUCUUGGC	2	66.6089	3	0.955051	Output/S8h/cleaveLand_result/t_plot/PC-3p-13278_910_XM_016111091.2_621_TPlot.pdf	4	121.124	2	0.999991	Output/S0h/cleaveLand_result/t_plot/PC-3p-13278_910_XM_016111091.2_621_TPlot.pdf	66.6089	121.124	-0.862697	down	6.9225e-05	7.7916e-05	yes	GO:0004471(malate dehydrogenase (decarboxylating) (NAD+) activity);GO:0050662(coenzyme binding);GO:0036094(small molecule binding);GO:0006082(organic acid metabolic process);GO:1901363(heterocyclic compound binding);GO:0016614(oxidoreductase activity, acting on CH-OH group of donors);GO:1901265(nucleoside phosphate binding);GO:0004470(malic enzyme activity);GO:0043648(dicarboxylic acid metabolic …	ko01100(Metabolic pathways);ko00620(Pyruvate metabolism);ko01200(Carbon metabolism);ko00710(Carbon fixation in photosynthetic organisms)
PC-3p-13278_910	XM_016112376.2	2604	2626	2617	-37	-25	0.675676	8.5	2-10,2625-2617;12-17,2616-2611;18-21,2607-2604	1-1,2626-2626[UP5];11-11,x-x[BULq];x-x,2610-2608[BULt]	((((...((((((-(((((((((.&.))))))))).))))))---))))	GCCAAUGGGAACA-CUUGCCGAGG&UUUUGGCAAGCUGUUCU---UGGC	1	33.3045	4	1	Output/S8h/cleaveLand_result/t_plot/PC-3p-13278_910_XM_016112376.2_2617_TPlot.pdf	0	0	NA	NA	NA	33.3045	0	Inf	up	7.8779e-09	1.42259e-08	yes	NA	NA
PC-3p-13278_910	XM_016112574.2	939	959	950	-37	-26.3	0.710811	7	2-4,958-956;6-21,954-939	1-1,959-959[UP5];5-5,955-955[SIL]	((((((((((((((((.(((.&.))).))))))))))))))))	GUUGAGGACAGCUUGUGAGAG&UUUUGGCAAGCUGUUCUUGGC	4	133.218	3	0.386015	Output/S8h/cleaveLand_result/t_plot/PC-3p-13278_910_XM_016112574.2_950_TPlot.pdf	3	90.843	3	0.407629	Output/S0h/cleaveLand_result/t_plot/PC-3p-13278_910_XM_016112574.2_950_TPlot.pdf	133.218	90.843	0.55234	up	0.0046394	0.00507724	yes	GO:0005488(binding);GO:0030554(adenyl nucleotide binding);GO:0097159(organic cyclic compound binding);GO:0043167(ion binding);GO:1901265(nucleoside phosphate binding);GO:0043168(anion binding);GO:1901363(heterocyclic compound binding);GO:0017076(purine nucleotide binding);GO:0036094(small molecule binding);GO:0032559(adenyl ribonucleotide binding);GO:0005524(ATP binding);GO:0097367(carbohydrate d…	ko04141(Protein processing in endoplasmic reticulum);ko04144(Endocytosis);ko03040(Spliceosome)
PC-3p-13278_910	XM_016113911.2	275	299	290	-37	-27.8	0.751351	8.5	1-12,299-288;14-14,286-286;15-21,281-275	13-13,287-287[SIL];x-x,285-282[BULt]	(((((((....(.((((((((((((&)))))))))))).)----)))))))	GCCGAGGUUCUGGAGCUUGCCGGAA&UUUUGGCAAGCUGU----UCUUGGC	0	0	NA	NA	NA	3	90.843	2	0.475414	Output/S0h/cleaveLand_result/t_plot/PC-3p-13278_910_XM_016113911.2_290_TPlot.pdf	0	90.843	-Inf	down	1.5521e-21	1.73737e-20	yes	GO:0005634(nucleus);GO:0031323(regulation of cellular metabolic process);GO:0040029(regulation of gene expression, epigenetic);GO:0097159(organic cyclic compound binding);GO:0044428(nuclear part);GO:0071840(cellular component organization or biogenesis);GO:0016043(cellular component organization);GO:0000785(chromatin);GO:0000228(nuclear chromosome);GO:0006342(chromatin silencing);GO:0046982(prote…	NA
PC-3p-13278_910	XM_016113994.2	210	230	221	-37	-25.7	0.694595	5.5	1-15,230-216;17-20,214-211	16-16,215-215[SIL];21-21,210-210[UP3]	.((((.(((((((((((((((&))))))))))))))).)))).	ACCAAAGGCAGCUUGCUAAGG&UUUUGGCAAGCUGUUCUUGGC	1	33.3045	4	0.999847	Output/S8h/cleaveLand_result/t_plot/PC-3p-13278_910_XM_016113994.2_221_TPlot.pdf	0	0	NA	NA	NA	33.3045	0	Inf	up	7.8779e-09	1.42259e-08	yes	GO:0044464(cell part);GO:0005622(intracellular);GO:0016043(cellular component organization);GO:0006999(nuclear pore organization);GO:0017056(structural constituent of nuclear pore);GO:0043229(intracellular organelle);GO:0005635(nuclear envelope);GO:0005643(nuclear pore);GO:0032991(macromolecular complex);GO:0044446(intracellular organelle part);GO:0005198(structural molecule activity);GO:0044422(…	NA
PC-3p-13278_910	XM_016114330.2	186	207	197	-37	-25.52	0.68973	12	3-7,205-201;11-21,196-186	1-2,207-206[UP5];8-10,200-197[AILt]	(((((((((((....(((((..&..)))))-...)))))))))))	GCCAAGGGCAGAAACGCCAAUC&UUUUGGC-AAGCUGUUCUUGGC	1	33.3045	4	0.999978	Output/S8h/cleaveLand_result/t_plot/PC-3p-13278_910_XM_016114330.2_197_TPlot.pdf	1	30.281	4	0.999988	Output/S0h/cleaveLand_result/t_plot/PC-3p-13278_910_XM_016114330.2_197_TPlot.pdf	33.3045	30.281	0.137303	up	0.70456	0.704918	yes	GO:1901363(heterocyclic compound binding);GO:0005488(binding);GO:0097159(organic cyclic compound binding);GO:0003676(nucleic acid binding)	ko03008(Ribosome biogenesis in eukaryotes);ko03013(RNA transport)
PC-3p-13278_910	XM_016114886.1	747	767	758	-37	-26.3	0.710811	4.5	2-10,766-758;12-19,756-749;21-21,747-747	1-1,767-767[UP5];11-11,757-757[SIL];20-20,748-748[SIL]	(.((((((((.(((((((((.&.))))))))).)))))))).)	GGCGAGAACAACUUGCCAAAC&UUUUGGCAAGCUGUUCUUGGC	0	0	NA	NA	NA	1	30.281	4	0.995534	Output/S0h/cleaveLand_result/t_plot/PC-3p-13278_910_XM_016114886.1_758_TPlot.pdf	0	30.281	-Inf	down	3.7368e-08	4.29087e-08	yes	NA	ko00270(Cysteine and methionine metabolism);ko01100(Metabolic pathways)
PC-3p-13278_910	XM_016115446.2	240	258	251	-37	-24.9	0.672973	8.5	2-7,257-252;10-19,251-242;21-21,240-240	1-1,258-258[UP5];8-9,x-x[BULq];20-20,241-241[SIL]	(.((((((((((--((((((.&.))))))..)))))))))).)	GGCAAGAGCAGC--GCCGAGG&UUUUGGCAAGCUGUUCUUGGC	1	33.3045	4	1	Output/S8h/cleaveLand_result/t_plot/PC-3p-13278_910_XM_016115446.2_251_TPlot.pdf	3	90.843	3	0.854559	Output/S0h/cleaveLand_result/t_plot/PC-3p-13278_910_XM_016115446.2_251_TPlot.pdf	33.3045	90.843	-1.44766	down	2.4146e-07	2.74105e-07	yes	GO:0044464(cell part);GO:0006082(organic acid metabolic process);GO:0046872(metal ion binding);GO:0016740(transferase activity);GO:0050667(homocysteine metabolic process);GO:0006807(nitrogen compound metabolic process);GO:0000097(sulfur amino acid biosynthetic process);GO:0044272(sulfur compound biosynthetic process);GO:1901607(alpha-amino acid biosynthetic process);GO:0003824(catalytic activity)…	ko01100(Metabolic pathways);ko01230(Biosynthesis of amino acids);ko00270(Cysteine and methionine metabolism);ko01110(Biosynthesis of secondary metabolites);ko00450(Selenocompound metabolism)
PC-3p-13278_910	XM_016115883.2	804	825	816	-37	-24.7	0.667568	10	4-17,822-809;20-21,805-804	1-3,825-823[UP5];18-19,808-806[AILt]	((...((((((((((((((...&...))))))))))))))-..))	GCAAUGGAGCAGUUUGCCACCA&UUUUGGCAAGCUGUUCU-UGGC	2	66.6089	2	0.999602	Output/S8h/cleaveLand_result/t_plot/PC-3p-13278_910_XM_016115883.2_816_TPlot.pdf	0	0	NA	NA	NA	66.6089	0	Inf	up	3.3071e-16	2.0359e-15	yes	GO:0031224(intrinsic component of membrane);GO:0044425(membrane part);GO:0016020(membrane);GO:0016021(integral component of membrane)	NA
PC-3p-13278_910	XM_016116271.2	1016	1043	1034	-37	-24.9	0.672973	19	1-11,1043-1033;12-12,1025-1025;14-21,1023-1016	x-x,1032-1026[BULt];13-13,1024-1024[SIL]	((((((((.(.......(((((((((((&)))))))))))-------).))))))))	GCUAAGAGGGUUUUGACGCUUGCCGAGA&UUUUGGCAAGC-------UGUUCUUGGC	1	33.3045	4	1	Output/S8h/cleaveLand_result/t_plot/PC-3p-13278_910_XM_016116271.2_1034_TPlot.pdf	1	30.281	4	1	Output/S0h/cleaveLand_result/t_plot/PC-3p-13278_910_XM_016116271.2_1034_TPlot.pdf	33.3045	30.281	0.137303	up	0.70456	0.704918	yes	GO:1901576(organic substance biosynthetic process);GO:0043226(organelle);GO:0008483(transaminase activity);GO:0044283(small molecule biosynthetic process);GO:0005737(cytoplasm);GO:0044249(cellular biosynthetic process);GO:0032787(monocarboxylic acid metabolic process);GO:0019438(aromatic compound biosynthetic process);GO:0006807(nitrogen compound metabolic process);GO:0044464(cell part);GO:000608…	ko00790(Folate biosynthesis)
PC-3p-13278_910	XM_016116409.2	2009	2030	2021	-37	-24.4	0.659459	9	4-13,2027-2018;14-20,2016-2010	1-3,2030-2028[UP5];x-x,2017-2017[BULt];21-21,2009-2009[UP3]	.(((((((.((((((((((...&...))))))))))-))))))).	ACUGGGGAUCAGCUUGCCAUCG&UUUUGGCAAGCUG-UUCUUGGC	0	0	NA	NA	NA	2	60.562	2	0.999968	Output/S0h/cleaveLand_result/t_plot/PC-3p-13278_910_XM_016116409.2_2021_TPlot.pdf	0	60.562	-Inf	down	7.123e-15	2.99612e-14	yes	GO:0043226(organelle);GO:0065007(biological regulation);GO:0022853(active ion transmembrane transporter activity);GO:0042626(ATPase activity, coupled to transmembrane movement of substances);GO:0016817(hydrolase activity, acting on acid anhydrides);GO:0006793(phosphorus metabolic process);GO:0022890(inorganic cation transmembrane transporter activity);GO:0006796(phosphate-containing compound meta…	ko00190(Oxidative phosphorylation)
PC-3p-13278_910	XM_016116955.2	462	482	473	-37	-24.3	0.656757	9	2-9,481-474;12-21,471-462	1-1,482-482[UP5];10-11,473-472[SIL]	((((((((((..((((((((.&.))))))))..))))))))))	GUCGGGGACAAGUUGCCGGAG&UUUUGGCAAGCUGUUCUUGGC	6	199.827	2	0.99997	Output/S8h/cleaveLand_result/t_plot/PC-3p-13278_910_XM_016116955.2_473_TPlot.pdf	20	605.62	2	0.999984	Output/S0h/cleaveLand_result/t_plot/PC-3p-13278_910_XM_016116955.2_473_TPlot.pdf	199.827	605.62	-1.59966	down	2.1492e-46	1.54377e-44	yes	GO:0009057(macromolecule catabolic process);GO:0006807(nitrogen compound metabolic process);GO:0005576(extracellular region);GO:0043227(membrane-bounded organelle);GO:0009987(cellular process);GO:0016021(integral component of membrane);GO:0070011(peptidase activity, acting on L-amino acid peptides);GO:0009056(catabolic process);GO:0005622(intracellular);GO:0004197(cysteine-type endopeptidase acti…	ko04145(Phagosome)
PC-3p-13278_910	XM_016116980.2	1037	1055	1046	-37	-28.6	0.772973	4.5	2-12,1054-1044;15-21,1043-1037	1-1,1055-1055[UP5];13-14,x-x[BULq]	(((((((--(((((((((((.&.)))))))))))..)))))))	GCCAGGA--AGCUUGCCAGAC&UUUUGGCAAGCUGUUCUUGGC	0	0	NA	NA	NA	1	30.281	4	0.532448	Output/S0h/cleaveLand_result/t_plot/PC-3p-13278_910_XM_016116980.2_1046_TPlot.pdf	0	30.281	-Inf	down	3.7368e-08	4.29087e-08	yes	NA	NA
PC-3p-13278_910	XM_016117284.2	2214	2237	2228	-37	-27.5	0.743243	8.5	3-14,2235-2224;15-16,2220-2219;18-21,2217-2214	1-2,2237-2236[UP5];x-x,2223-2221[BULt];17-17,2218-2218[SIL]	((((.((...((((((((((((..&..))))))))))))---)).))))	GCCAUGACAUGCGGCUUGCCAACC&UUUUGGCAAGCUGU---UCUUGGC	1	33.3045	4	0.878284	Output/S8h/cleaveLand_result/t_plot/PC-3p-13278_910_XM_016117284.2_2228_TPlot.pdf	2	60.562	3	0.194988	Output/S0h/cleaveLand_result/t_plot/PC-3p-13278_910_XM_016117284.2_2228_TPlot.pdf	33.3045	60.562	-0.862697	down	0.0049011	0.0052713	yes	GO:0016757(transferase activity, transferring glycosyl groups);GO:0051704(multi-organism process);GO:0009311(oligosaccharide metabolic process);GO:0009877(nodulation);GO:0044419(interspecies interaction between organisms);GO:0044237(cellular metabolic process);GO:0008194(UDP-glycosyltransferase activity);GO:0046527(glucosyltransferase activity);GO:0005984(disaccharide metabolic process);GO:000815…	ko01100(Metabolic pathways);ko00500(Starch and sucrose metabolism)
PC-3p-13278_910	XM_016117292.2	1785	1809	1796	-37	-25.86	0.698919	13.5	1-9,1809-1801;12-21,1794-1785	10-11,1800-1795[AILt]	((((((((((......(((((((((&)))))))))----..))))))))))	GCCAGGAACAAAUUGAUUGCCAGAA&UUUUGGCAA----GCUGUUCUUGGC	0	0	NA	NA	NA	1	30.281	4	0.999618	Output/S0h/cleaveLand_result/t_plot/PC-3p-13278_910_XM_016117292.2_1796_TPlot.pdf	0	30.281	-Inf	down	3.7368e-08	4.29087e-08	yes	GO:0016020(membrane);GO:0016021(integral component of membrane);GO:0031224(intrinsic component of membrane);GO:0044425(membrane part)	ko01100(Metabolic pathways);ko00600(Sphingolipid metabolism)
PC-3p-13278_910	XM_016117984.2	537	557	548	-37	-25.5	0.689189	6	1-4,557-554;6-20,552-538	5-5,553-553[SIL];21-21,537-537[UP3]	.(((((((((((((((.((((&)))).))))))))))))))).	ACCAAGAAUGGCUUGCAGAAG&UUUUGGCAAGCUGUUCUUGGC	1	33.3045	4	0.999985	Output/S8h/cleaveLand_result/t_plot/PC-3p-13278_910_XM_016117984.2_548_TPlot.pdf	4	121.124	0	0.11009	Output/S0h/cleaveLand_result/t_plot/PC-3p-13278_910_XM_016117984.2_548_TPlot.pdf	33.3045	121.124	-1.8627	down	1.5815e-12	6.50417e-12	yes	GO:0003824(catalytic activity);GO:0043170(macromolecule metabolic process);GO:0019538(protein metabolic process);GO:0036094(small molecule binding);GO:0097367(carbohydrate derivative binding);GO:0017076(purine nucleotide binding);GO:0032555(purine ribonucleotide binding);GO:0005488(binding);GO:0043168(anion binding);GO:0044238(primary metabolic process);GO:0032553(ribonucleotide binding);GO:00163…	NA
PC-3p-13278_910	XM_016117985.2	536	556	547	-37	-25.5	0.689189	6	1-4,556-553;6-20,551-537	5-5,552-552[SIL];21-21,536-536[UP3]	.(((((((((((((((.((((&)))).))))))))))))))).	ACCAAGAAUGGCUUGCAGAAG&UUUUGGCAAGCUGUUCUUGGC	0	0	NA	NA	NA	2	60.562	2	0.983321	Output/S0h/cleaveLand_result/t_plot/PC-3p-13278_910_XM_016117985.2_547_TPlot.pdf	0	60.562	-Inf	down	7.123e-15	2.99612e-14	yes	GO:0003824(catalytic activity);GO:0043170(macromolecule metabolic process);GO:0019538(protein metabolic process);GO:0036094(small molecule binding);GO:0097367(carbohydrate derivative binding);GO:0017076(purine nucleotide binding);GO:0032555(purine ribonucleotide binding);GO:0005488(binding);GO:0043168(anion binding);GO:0044238(primary metabolic process);GO:0032553(ribonucleotide binding);GO:00163…	NA
PC-3p-13278_910	XM_021124919.1	2792	2813	2803	-37	-27.1	0.732432	8	4-9,2810-2805;10-21,2803-2792	1-3,2813-2811[UP5];x-x,2804-2804[BULt]	((((((((((((.((((((...&...))))))-))))))))))))	GCCAAGAGUAGCUUUGCCAUCU&UUUUGGCAA-GCUGUUCUUGGC	1	33.3045	4	0.923776	Output/S8h/cleaveLand_result/t_plot/PC-3p-13278_910_XM_021124919.1_2803_TPlot.pdf	0	0	NA	NA	NA	33.3045	0	Inf	up	7.8779e-09	1.42259e-08	yes	GO:0018130(heterocycle biosynthetic process);GO:0044281(small molecule metabolic process);GO:0042398(cellular modified amino acid biosynthetic process);GO:0046653(tetrahydrofolate metabolic process);GO:1901566(organonitrogen compound biosynthetic process);GO:0043648(dicarboxylic acid metabolic process);GO:1901564(organonitrogen compound metabolic process);GO:0006760(folic acid-containing compound…	ko01100(Metabolic pathways);ko00790(Folate biosynthesis)
PC-3p-13278_910	XM_021126167.1	1163	1183	1174	-37	-27.4	0.740541	7.5	4-13,1180-1171;15-16,1169-1168;18-21,1166-1163	1-3,1183-1181[UP5];14-14,1170-1170[SIL];17-17,1167-1167[SIL]	((((.((.((((((((((...&...)))))))))).)).))))	GCCGCGAUCAGCUUGCCAUCA&UUUUGGCAAGCUGUUCUUGGC	1	33.3045	4	0.890565	Output/S8h/cleaveLand_result/t_plot/PC-3p-13278_910_XM_021126167.1_1174_TPlot.pdf	0	0	NA	NA	NA	33.3045	0	Inf	up	7.8779e-09	1.42259e-08	yes	GO:0015197(peptide transporter activity);GO:0051641(cellular localization);GO:0019899(enzyme binding);GO:0005829(cytosol);GO:0005635(nuclear envelope);GO:0015031(protein transport);GO:0017038(protein import);GO:0008536(Ran GTPase binding);GO:0043229(intracellular organelle);GO:0051234(establishment of localization);GO:0044424(intracellular part);GO:0051179(localization);GO:0005488(binding);GO:005…	NA
PC-3p-13278_910	XM_021126398.1	611	632	623	-37	-24.6	0.664865	10	5-12,628-621;14-18,619-615;19-21,613-611	1-4,632-629[UP5];13-13,620-620[SIL];x-x,614-614[BULt]	(((.(((((.((((((((....&....)))))))).)))))-)))	GCCGAAGAAGAGUUUGCCCGAG&UUUUGGCAAGCUGUUCUU-GGC	0	0	NA	NA	NA	1	30.281	4	1	Output/S0h/cleaveLand_result/t_plot/PC-3p-13278_910_XM_021126398.1_623_TPlot.pdf	0	30.281	-Inf	down	3.7368e-08	4.29087e-08	yes	GO:0016787(hydrolase activity);GO:0003824(catalytic activity)	ko01110(Biosynthesis of secondary metabolites);ko00130(Ubiquinone and other terpenoid-quinone biosynthesis);ko04120(Ubiquitin mediated proteolysis);ko04146(Peroxisome);ko01100(Metabolic pathways);ko00590(Arachidonic acid metabolism)
PC-3p-13278_910	XM_021126602.1	1182	1199	1193	-37	-26.7	0.721622	7	1-6,1199-1194;10-21,1193-1182	7-9,x-x[BULq]	((((((((((((---((((((&))))))...))))))))))))	GCCAAGAACAGC---CCAGAA&UUUUGGCAAGCUGUUCUUGGC	0	0	NA	NA	NA	2	60.562	3	0.310957	Output/S0h/cleaveLand_result/t_plot/PC-3p-13278_910_XM_021126602.1_1193_TPlot.pdf	0	60.562	-Inf	down	7.123e-15	2.99612e-14	yes	GO:0016020(membrane);GO:0016798(hydrolase activity, acting on glycosyl bonds);GO:0016021(integral component of membrane);GO:0006810(transport);GO:0008152(metabolic process);GO:0005215(transporter activity);GO:0044425(membrane part);GO:0102483(scopolin beta-glucosidase activity);GO:0003824(catalytic activity);GO:0071704(organic substance metabolic process);GO:0044238(primary metabolic process);GO:…	ko01110(Biosynthesis of secondary metabolites);ko00500(Starch and sucrose metabolism);ko01100(Metabolic pathways);ko00460(Cyanoamino acid metabolism);ko00940(Phenylpropanoid biosynthesis)
PC-3p-13278_910	XM_021126663.1	657	678	669	-37	-25	0.675676	9.5	3-7,676-672;10-19,669-660;20-21,658-657	1-2,678-677[UP5];8-9,671-670[SIL];x-x,659-659[BULt]	((.((((((((((..(((((..&..)))))..))))))))))-))	GCUCAAGGACGGCACGCCAAUC&UUUUGGCAAGCUGUUCUUG-GC	0	0	NA	NA	NA	1	30.281	4	1	Output/S0h/cleaveLand_result/t_plot/PC-3p-13278_910_XM_021126663.1_669_TPlot.pdf	0	30.281	-Inf	down	3.7368e-08	4.29087e-08	yes	GO:0044425(membrane part);GO:0031224(intrinsic component of membrane);GO:0016020(membrane);GO:0016021(integral component of membrane)	NA
PC-3p-13278_910	XM_021128895.1	352	373	364	-37	-24.3	0.656757	8	2-15,372-359;16-18,357-355;20-21,353-352	1-1,373-373[UP5];x-x,358-358[BULt];19-19,354-354[SIL]	((.(((.((((((((((((((.&.))))))))))))))-))).))	GCGGAGAAGCGGUUUGCUGAAG&UUUUGGCAAGCUGUU-CUUGGC	0	0	NA	NA	NA	1	30.281	4	1	Output/S0h/cleaveLand_result/t_plot/PC-3p-13278_910_XM_021128895.1_364_TPlot.pdf	0	30.281	-Inf	down	3.7368e-08	4.29087e-08	yes	GO:0010556(regulation of macromolecule biosynthetic process);GO:0090304(nucleic acid metabolic process);GO:0018130(heterocycle biosynthetic process);GO:1901360(organic cyclic compound metabolic process);GO:1903506(regulation of nucleic acid-templated transcription);GO:0005488(binding);GO:0046483(heterocycle metabolic process);GO:0006351(transcription, DNA-templated);GO:0032774(RNA biosynthetic pr…	NA
PC-3p-13278_910	XM_021129247.1	1188	1209	1200	-37	-28.1	0.759459	7	3-12,1207-1198;13-16,1196-1193;18-21,1191-1188	1-2,1209-1208[UP5];x-x,1197-1197[BULt];17-17,1192-1192[SIL]	((((.((((.((((((((((..&..))))))))))-)))).))))	GCCAUGGGCAAGCUUGCCAAUC&UUUUGGCAAGCU-GUUCUUGGC	1	33.3045	4	0.632064	Output/S8h/cleaveLand_result/t_plot/PC-3p-13278_910_XM_021129247.1_1200_TPlot.pdf	0	0	NA	NA	NA	33.3045	0	Inf	up	7.8779e-09	1.42259e-08	yes	GO:0006355(regulation of transcription, DNA-templated);GO:0019222(regulation of metabolic process);GO:0003677(DNA binding);GO:0050794(regulation of cellular process);GO:0060255(regulation of macromolecule metabolic process);GO:0050789(regulation of biological process);GO:2000112(regulation of cellular macromolecule biosynthetic process);GO:0043565(sequence-specific DNA binding);GO:1903506(regulat…	ko04075(Plant hormone signal transduction)
PC-3p-13278_910	XM_021129934.1	358	377	369	-37	-25.1	0.678378	12.5	5-7,373-371;10-21,369-358	1-4,377-374[UP5];8-9,370-370[AILq]	((((((((((((.-(((....&....)))..))))))))))))	GCCAGGAACAGUA-GCCCUUC&UUUUGGCAAGCUGUUCUUGGC	0	0	NA	NA	NA	1	30.281	4	1	Output/S0h/cleaveLand_result/t_plot/PC-3p-13278_910_XM_021129934.1_369_TPlot.pdf	0	30.281	-Inf	down	3.7368e-08	4.29087e-08	yes	GO:0044424(intracellular part);GO:0005623(cell);GO:0043226(organelle);GO:0043229(intracellular organelle);GO:0005622(intracellular);GO:0044464(cell part);GO:0005694(chromosome);GO:0043228(non-membrane-bounded organelle);GO:0005488(binding);GO:0043232(intracellular non-membrane-bounded organelle)	NA
PC-3p-13278_910	XM_021131374.1	938	956	947	-37	-25.8	0.697297	9	5-12,952-945;15-21,944-938	1-4,956-953[UP5];13-14,x-x[BULq]	(((((((--((((((((....&....))))))))..)))))))	GCCAAGA--AGCUUGCCUUGG&UUUUGGCAAGCUGUUCUUGGC	0	0	NA	NA	NA	1	30.281	4	0.999627	Output/S0h/cleaveLand_result/t_plot/PC-3p-13278_910_XM_021131374.1_947_TPlot.pdf	0	30.281	-Inf	down	3.7368e-08	4.29087e-08	yes	GO:0016020(membrane);GO:0016021(integral component of membrane);GO:0031224(intrinsic component of membrane);GO:0044425(membrane part)	NA
PC-3p-13278_910	XM_021135755.1	64	87	75	-37	-24.82	0.670811	18.5	5-7,83-81;10-21,75-64	1-4,87-84[UP5];8-9,80-76[AILt]	((((((((((((.....(((....&....)))---..))))))))))))	GCCAAGGACAGCGUAAGGCUCGUC&UUUUGGC---AAGCUGUUCUUGGC	3	99.9134	2	0.998431	Output/S8h/cleaveLand_result/t_plot/PC-3p-13278_910_XM_021135755.1_75_TPlot.pdf	0	0	NA	NA	NA	99.9134	0	Inf	up	1.5881e-23	2.42062e-22	yes	GO:1904680(peptide transmembrane transporter activity);GO:0070727(cellular macromolecule localization);GO:0005623(cell);GO:0071702(organic substance transport);GO:0022884(macromolecule transmembrane transporter activity);GO:0034613(cellular protein localization);GO:0071705(nitrogen compound transport);GO:0005215(transporter activity);GO:0015399(primary active transmembrane transporter activity);G…	ko04145(Phagosome);ko03060(Protein export);ko04141(Protein processing in endoplasmic reticulum)
PC-3p-13278_910	XM_021137061.1	1732	1753	1744	-37	-28.1	0.759459	7.5	3-10,1751-1744;12-21,1741-1732	1-2,1753-1752[UP5];11-11,1743-1742[AILt]	((((((((((..((((((((..&..))))))))-.))))))))))	GCCGAGAACAUACUUGCCAAUG&UUUUGGCAAG-CUGUUCUUGGC	0	0	NA	NA	NA	1	30.281	4	0.634397	Output/S0h/cleaveLand_result/t_plot/PC-3p-13278_910_XM_021137061.1_1744_TPlot.pdf	0	30.281	-Inf	down	3.7368e-08	4.29087e-08	yes	GO:0043229(intracellular organelle);GO:0097659(nucleic acid-templated transcription);GO:0050794(regulation of cellular process);GO:0034645(cellular macromolecule biosynthetic process);GO:0090304(nucleic acid metabolic process);GO:0003714(transcription corepressor activity);GO:0043226(organelle);GO:0005623(cell);GO:0010605(negative regulation of macromolecule metabolic process);GO:0006725(cellular…	NA
PC-3p-13278_910	XM_021139765.1	2612	2631	2623	-37	-25.6	0.691892	9.5	3-7,2629-2625;10-21,2623-2612	1-2,2631-2630[UP5];8-9,2624-2624[AILq]	((((((((((((.-(((((..&..)))))..))))))))))))	GCCAAGAAUGGUG-GCCAAUU&UUUUGGCAAGCUGUUCUUGGC	1	33.3045	4	0.999965	Output/S8h/cleaveLand_result/t_plot/PC-3p-13278_910_XM_021139765.1_2623_TPlot.pdf	0	0	NA	NA	NA	33.3045	0	Inf	up	7.8779e-09	1.42259e-08	yes	GO:0036094(small molecule binding);GO:0005488(binding);GO:1901265(nucleoside phosphate binding);GO:0003723(RNA binding);GO:0000166(nucleotide binding);GO:0097159(organic cyclic compound binding);GO:0003676(nucleic acid binding);GO:1901363(heterocyclic compound binding)	NA
PC-3p-13278_910	XM_021140641.1	1283	1302	1293	-37	-24.8	0.67027	9.5	5-10,1298-1293;12-21,1292-1283	1-4,1302-1299[UP5];11-11,x-x[BULq]	((((((((((-((((((....&....)))))).))))))))))	GUCAAGAACA-CUUGCCUAGG&UUUUGGCAAGCUGUUCUUGGC	1	33.3045	4	1	Output/S8h/cleaveLand_result/t_plot/PC-3p-13278_910_XM_021140641.1_1293_TPlot.pdf	0	0	NA	NA	NA	33.3045	0	Inf	up	7.8779e-09	1.42259e-08	yes	NA	ko04141(Protein processing in endoplasmic reticulum)
PC-3p-13278_910	XM_021141128.1	597	623	614	-37	-25.3	0.683784	10	1-14,623-610;15-21,603-597	x-x,609-604[BULt]	(((((((......((((((((((((((&))))))))))))))------)))))))	GUCAAGGUCACUAGCAGCUUGUCAAGG&UUUUGGCAAGCUGU------UCUUGGC	0	0	NA	NA	NA	1	30.281	4	0.999998	Output/S0h/cleaveLand_result/t_plot/PC-3p-13278_910_XM_021141128.1_614_TPlot.pdf	0	30.281	-Inf	down	3.7368e-08	4.29087e-08	yes	GO:0010556(regulation of macromolecule biosynthetic process);GO:0050794(regulation of cellular process);GO:0001883(purine nucleoside binding);GO:0034645(cellular macromolecule biosynthetic process);GO:0009059(macromolecule biosynthetic process);GO:0031966(mitochondrial membrane);GO:0003824(catalytic activity);GO:0043043(peptide biosynthetic process);GO:0016020(membrane);GO:0043229(intracellular o…	NA
PC-3p-13278_910	XM_021142486.1	926	946	937	-37	-24.7	0.667568	7.5	1-5,946-942;7-17,940-930;19-21,928-926	6-6,941-941[SIL];18-18,929-929[SIL]	(((.(((((((((((.(((((&))))).))))))))))).)))	GCUUAGAACGGUUUGGCGAGA&UUUUGGCAAGCUGUUCUUGGC	0	0	NA	NA	NA	1	30.281	4	1	Output/S0h/cleaveLand_result/t_plot/PC-3p-13278_910_XM_021142486.1_937_TPlot.pdf	0	30.281	-Inf	down	3.7368e-08	4.29087e-08	yes	GO:0046483(heterocycle metabolic process);GO:0030554(adenyl nucleotide binding);GO:0009987(cellular process);GO:0044424(intracellular part);GO:0048731(system development);GO:0035670(plant-type ovary development);GO:0048437(floral organ development);GO:0043227(membrane-bounded organelle);GO:0048438(floral whorl development);GO:0097367(carbohydrate derivative binding);GO:0022414(reproductive proces…	ko00970(Aminoacyl-tRNA biosynthesis)
PC-3p-13278_910	XM_021142677.1	1346	1365	1356	-37	-25.3	0.683784	12	6-11,1360-1355;13-21,1354-1346	1-5,1365-1361[UP5];12-12,x-x[BULq]	(((((((((-((((((.....&.....)))))).)))))))))	GCCGGGAAC-GCUUGCGUGAG&UUUUGGCAAGCUGUUCUUGGC	0	0	NA	NA	NA	1	30.281	4	0.999997	Output/S0h/cleaveLand_result/t_plot/PC-3p-13278_910_XM_021142677.1_1356_TPlot.pdf	0	30.281	-Inf	down	3.7368e-08	4.29087e-08	yes	GO:0005488(binding);GO:0046872(metal ion binding);GO:0010556(regulation of macromolecule biosynthetic process);GO:1903506(regulation of nucleic acid-templated transcription);GO:0060255(regulation of macromolecule metabolic process);GO:0031323(regulation of cellular metabolic process);GO:0019219(regulation of nucleobase-containing compound metabolic process);GO:0031326(regulation of cellular biosy…	NA
PC-3p-13278_910	XM_021143289.1	2226	2246	2238	-37	-26.1	0.705405	11	5-8,2242-2239;10-12,2238-2236;13-21,2234-2226	1-4,2246-2243[UP5];9-9,x-x[BULq];x-x,2235-2235[BULt]	(((((((((.(((-((((....&....)))).)))-)))))))))	GCCAAGAACAAGC-UGCCUGGA&UUUUGGCAAGCU-GUUCUUGGC	3	99.9134	2	0.880948	Output/S8h/cleaveLand_result/t_plot/PC-3p-13278_910_XM_021143289.1_2238_TPlot.pdf	0	0	NA	NA	NA	99.9134	0	Inf	up	1.5881e-23	2.42062e-22	yes	GO:0003676(nucleic acid binding);GO:0005488(binding);GO:0097159(organic cyclic compound binding);GO:1901363(heterocyclic compound binding)	NA
PC-3p-134942_50	BGI_novel_T007839	801	824	815	-36.3	-26.66	0.734435	10.5	1-6,824-819;11-24,814-801	7-10,818-815[SIL]	((((((((((((((....((((((&))))))....))))))))))))))	AGUGUCUUAGUGAUGCCGGAUUGU&ACGAUUAAAAAUCACUGAGACACU	0	0	NA	NA	NA	1	30.281	4	0.0648801	Output/S0h/cleaveLand_result/t_plot/PC-3p-134942_50_BGI_novel_T007839_815_TPlot.pdf	0	30.281	-Inf	down	3.7368e-08	4.29087e-08	yes	GO:0071554(cell wall organization or biogenesis);GO:0071555(cell wall organization);GO:0005576(extracellular region);GO:0016788(hydrolase activity, acting on ester bonds);GO:0016787(hydrolase activity);GO:0009505(plant-type cell wall);GO:0005618(cell wall);GO:0003824(catalytic activity);GO:0030312(external encapsulating structure);GO:0005623(cell);GO:0071944(cell periphery);GO:0052793(pectin acet…	NA
PC-3p-1355_7915	BGI_novel_T000365	1919	1948	1939	-29.6	-19.3	0.652027	14	1-13,1948-1936;14-20,1926-1920	x-x,1935-1927[BULt];21-21,1919-1919[UP3]	.(((((((.........(((((((((((((&)))))))))))))---------))))))).	GGCUUGAUGAAGACAUCCGAACUCUUGCUA&UGGUAAGAGUUUG---------AUUAAGUA	0	0	NA	NA	NA	1	30.281	4	0.999999	Output/S0h/cleaveLand_result/t_plot/PC-3p-1355_7915_BGI_novel_T000365_1939_TPlot.pdf	0	30.281	-Inf	down	3.7368e-08	4.29087e-08	yes	GO:0098791(Golgi subcompartment);GO:0005622(intracellular);GO:0045229(external encapsulating structure organization);GO:0044431(Golgi apparatus part);GO:0012505(endomembrane system);GO:0098588(bounding membrane of organelle);GO:0005623(cell);GO:0016740(transferase activity);GO:0016043(cellular component organization);GO:0031090(organelle membrane);GO:0044425(membrane part);GO:0016020(membrane);GO…	NA
PC-3p-1355_7915	BGI_novel_T001210	1085	1105	1096	-29.6	-22.3	0.753378	7	2-5,1104-1101;7-12,1099-1094;14-21,1092-1085	1-1,1105-1105[UP5];6-6,1100-1100[SIL];13-13,1093-1093[SIL]	((((((((.((((((.((((.&.)))).)))))).))))))))	UGCUUAGUGGAACUCCUGCCU&UGGUAAGAGUUUGAUUAAGUA	0	0	NA	NA	NA	1	30.281	4	0.521876	Output/S0h/cleaveLand_result/t_plot/PC-3p-1355_7915_BGI_novel_T001210_1096_TPlot.pdf	0	30.281	-Inf	down	3.7368e-08	4.29087e-08	yes	NA	NA
PC-3p-1355_7915	BGI_novel_T001211	1097	1117	1108	-29.6	-22.3	0.753378	7	2-5,1116-1113;7-12,1111-1106;14-21,1104-1097	1-1,1117-1117[UP5];6-6,1112-1112[SIL];13-13,1105-1105[SIL]	((((((((.((((((.((((.&.)))).)))))).))))))))	UGCUUAGUGGAACUCCUGCCU&UGGUAAGAGUUUGAUUAAGUA	0	0	NA	NA	NA	1	30.281	4	0.552897	Output/S0h/cleaveLand_result/t_plot/PC-3p-1355_7915_BGI_novel_T001211_1108_TPlot.pdf	0	30.281	-Inf	down	3.7368e-08	4.29087e-08	yes	NA	NA
PC-3p-1355_7915	BGI_novel_T002883	429	449	440	-29.6	-19.7	0.665541	9	1-13,449-437	14-21,436-429[UP3]	........(((((((((((((&)))))))))))))........	UUCUCAAACAGACUCUUACCA&UGGUAAGAGUUUGAUUAAGUA	1	33.3045	4	0.999863	Output/S8h/cleaveLand_result/t_plot/PC-3p-1355_7915_BGI_novel_T002883_440_TPlot.pdf	0	0	NA	NA	NA	33.3045	0	Inf	up	7.8779e-09	1.42259e-08	yes	GO:0043231(intracellular membrane-bounded organelle);GO:0003677(DNA binding);GO:0005623(cell);GO:0043226(organelle);GO:0003676(nucleic acid binding);GO:0005488(binding);GO:0005622(intracellular);GO:0043229(intracellular organelle);GO:0097159(organic cyclic compound binding);GO:0044424(intracellular part);GO:0044464(cell part);GO:0043227(membrane-bounded organelle);GO:0005634(nucleus);GO:0003700(D…	ko04016(MAPK signaling pathway - plant)
PC-3p-1355_7915	BGI_novel_T004220	365	392	382	-29.6	-20.7	0.699324	17	1-9,392-384;10-10,382-382;11-20,375-366	x-x,383-383[BULt];x-x,381-376[BULt];21-21,365-365[UP3]	.((((((((((......(.(((((((((&)))))))))-)------)))))))))).	AGCUUGAUCAACUUGGUGUCUCUUACCA&UGGUAAGAG-U------UUGAUUAAGUA	0	0	NA	NA	NA	1	30.281	4	0.978151	Output/S0h/cleaveLand_result/t_plot/PC-3p-1355_7915_BGI_novel_T004220_382_TPlot.pdf	0	30.281	-Inf	down	3.7368e-08	4.29087e-08	yes	GO:0003824(catalytic activity);GO:0016787(hydrolase activity);GO:0008152(metabolic process)	NA
PC-3p-1355_7915	BGI_novel_T006564	2664	2685	2676	-29.6	-21.3	0.719595	5	1-12,2685-2674;13-15,2672-2670;17-21,2668-2664	x-x,2673-2673[BULt];16-16,2669-2669[SIL]	(((((.(((.((((((((((((&))))))))))))-))).)))))	UACUUUGUUAAAGCUCUUACCA&UGGUAAGAGUUU-GAUUAAGUA	0	0	NA	NA	NA	2	60.562	2	0.57692	Output/S0h/cleaveLand_result/t_plot/PC-3p-1355_7915_BGI_novel_T006564_2676_TPlot.pdf	0	60.562	-Inf	down	7.123e-15	2.99612e-14	yes	GO:0043231(intracellular membrane-bounded organelle);GO:0043229(intracellular organelle);GO:0005622(intracellular);GO:0044424(intracellular part);GO:0005623(cell);GO:0005634(nucleus);GO:0044464(cell part);GO:0043226(organelle);GO:0005737(cytoplasm);GO:0043227(membrane-bounded organelle)	ko03018(RNA degradation)
PC-3p-1355_7915	BGI_novel_T007042	1806	1829	1821	-29.6	-19.8	0.668919	7.5	1-3,1829-1827;5-15,1826-1816;16-20,1811-1807	4-4,x-x[BULq];x-x,1815-1812[BULt];21-21,1806-1806[UP3]	.(((((....(((((((((((-(((&))).)))))))))))----))))).	AACUUAGGAAGUCAAACUCUU-CCA&UGGUAAGAGUUUGAU----UAAGUA	0	0	NA	NA	NA	1	30.281	4	0.999867	Output/S0h/cleaveLand_result/t_plot/PC-3p-1355_7915_BGI_novel_T007042_1821_TPlot.pdf	0	30.281	-Inf	down	3.7368e-08	4.29087e-08	yes	GO:0005623(cell);GO:0010468(regulation of gene expression);GO:0071365(cellular response to auxin stimulus);GO:0071310(cellular response to organic substance);GO:0050789(regulation of biological process);GO:0003676(nucleic acid binding);GO:0031323(regulation of cellular metabolic process);GO:0003677(DNA binding);GO:0009734(auxin-activated signaling pathway);GO:0044464(cell part);GO:0071495(cellula…	ko04075(Plant hormone signal transduction)
PC-3p-1355_7915	BGI_novel_T013524	924	949	940	-29.6	-20.3	0.685811	15	2-10,948-940;11-20,934-925	1-1,949-949[UP5];x-x,939-935[BULt];21-21,924-924[UP3]	.((((((((((.....(((((((((.&.)))))))))-----)))))))))).	AACUUAAUCAGGAGAUACUCUUGCUU&UGGUAAGAGU-----UUGAUUAAGUA	1	33.3045	4	0.997355	Output/S8h/cleaveLand_result/t_plot/PC-3p-1355_7915_BGI_novel_T013524_940_TPlot.pdf	0	0	NA	NA	NA	33.3045	0	Inf	up	7.8779e-09	1.42259e-08	yes	GO:0032553(ribonucleotide binding);GO:0035639(purine ribonucleoside triphosphate binding);GO:0032559(adenyl ribonucleotide binding);GO:0016773(phosphotransferase activity, alcohol group as acceptor);GO:1901363(heterocyclic compound binding);GO:0032555(purine ribonucleotide binding);GO:0030554(adenyl nucleotide binding);GO:0016301(kinase activity);GO:0043167(ion binding);GO:0005488(binding);GO:000…	NA
PC-3p-1355_7915	XM_016076320.2	1468	1485	1476	-29.6	-20.5	0.692568	8	2-14,1484-1472;18-20,1471-1469	1-1,1485-1485[UP5];15-17,x-x[BULq];21-21,1468-1468[UP3]	.(((---(((((((((((((.&.)))))))))))))...))).	AACU---UCGAGCUCUUGCCG&UGGUAAGAGUUUGAUUAAGUA	1	33.3045	4	0.988276	Output/S8h/cleaveLand_result/t_plot/PC-3p-1355_7915_XM_016076320.2_1476_TPlot.pdf	0	0	NA	NA	NA	33.3045	0	Inf	up	7.8779e-09	1.42259e-08	yes	GO:0043167(ion binding);GO:1901360(organic cyclic compound metabolic process);GO:0003824(catalytic activity);GO:0004497(monooxygenase activity);GO:0005488(binding);GO:0016709(oxidoreductase activity, acting on paired donors, with incorporation or reduction of molecular oxygen, NAD(P)H as one donor, and incorporation of one atom of oxygen);GO:0097159(organic cyclic compound binding);GO:1901363(het…	ko01100(Metabolic pathways);ko00360(Phenylalanine metabolism);ko00945(Stilbenoid, diarylheptanoid and gingerol biosynthesis);ko00941(Flavonoid biosynthesis);ko00130(Ubiquinone and other terpenoid-quinone biosynthesis);ko00940(Phenylpropanoid biosynthesis);ko01110(Biosynthesis of secondary metabolites)
PC-3p-1355_7915	XM_016077858.2	396	415	407	-29.6	-20.4	0.689189	9	2-5,414-411;7-16,410-401;18-20,399-397	1-1,415-415[UP5];6-6,x-x[BULq];17-17,400-400[SIL];21-21,396-396[UP3]	.(((.((((((((((-((((.&.)))).)))))))))).))).	AGCUGGAUCAGGCUC-UGCCU&UGGUAAGAGUUUGAUUAAGUA	0	0	NA	NA	NA	3	90.843	2	0.836763	Output/S0h/cleaveLand_result/t_plot/PC-3p-1355_7915_XM_016077858.2_407_TPlot.pdf	0	90.843	-Inf	down	1.5521e-21	1.73737e-20	yes	NA	NA
PC-3p-1355_7915	XM_016078331.2	574	596	587	-29.6	-20.4	0.689189	9.5	2-11,595-586;13-19,582-576	1-1,596-596[UP5];12-12,585-583[AILt];20-21,575-574[UP3]	..(((((((...((((((((((.&.))))))))))--.)))))))..	CCCUUGAUCCUCAACUCUUACCU&UGGUAAGAGUU--UGAUUAAGUA	0	0	NA	NA	NA	1	30.281	4	0.995116	Output/S0h/cleaveLand_result/t_plot/PC-3p-1355_7915_XM_016078331.2_587_TPlot.pdf	0	30.281	-Inf	down	3.7368e-08	4.29087e-08	yes	GO:0044464(cell part);GO:0003824(catalytic activity);GO:0034551(mitochondrial respiratory chain complex III assembly);GO:0017004(cytochrome complex assembly);GO:1901363(heterocyclic compound binding);GO:0030554(adenyl nucleotide binding);GO:0005488(binding);GO:0044444(cytoplasmic part);GO:0035639(purine ribonucleoside triphosphate binding);GO:0017062(respiratory chain complex III assembly);GO:003…	NA
PC-3p-1355_7915	XM_016079892.2	1221	1241	1232	-29.6	-19.5	0.658784	5.5	2-13,1240-1229;15-16,1227-1226;18-21,1224-1221	1-1,1241-1241[UP5];14-14,1228-1228[SIL];17-17,1225-1225[SIL]	((((.((.((((((((((((.&.)))))))))))).)).))))	UACUAGACCAAAUUCUUGCCG&UGGUAAGAGUUUGAUUAAGUA	0	0	NA	NA	NA	1	30.281	4	0.999987	Output/S0h/cleaveLand_result/t_plot/PC-3p-1355_7915_XM_016079892.2_1232_TPlot.pdf	0	30.281	-Inf	down	3.7368e-08	4.29087e-08	yes	NA	NA
PC-3p-1355_7915	XM_016084270.2	238	257	249	-29.6	-19.5	0.658784	8	2-5,256-253;7-19,252-240	1-1,257-257[UP5];6-6,x-x[BULq];20-21,239-238[UP3]	..(((((((((((((-((((.&.)))).)))))))))))))..	CUCUUGGUCAAGCUU-UACCG&UGGUAAGAGUUUGAUUAAGUA	0	0	NA	NA	NA	3	90.843	3	0.668527	Output/S0h/cleaveLand_result/t_plot/PC-3p-1355_7915_XM_016084270.2_249_TPlot.pdf	0	90.843	-Inf	down	1.5521e-21	1.73737e-20	yes	GO:0003735(structural constituent of ribosome);GO:0043228(non-membrane-bounded organelle);GO:0071704(organic substance metabolic process);GO:0006518(peptide metabolic process);GO:0043232(intracellular non-membrane-bounded organelle);GO:0043043(peptide biosynthetic process);GO:0022625(cytosolic large ribosomal subunit);GO:0022626(cytosolic ribosome);GO:0044237(cellular metabolic process);GO:000519…	ko03010(Ribosome)
PC-3p-1355_7915	XM_016085152.2	1163	1184	1174	-29.6	-23.9	0.807432	5	1-2,1184-1183;3-14,1181-1170;16-21,1168-1163	x-x,1182-1182[BULt];15-15,1169-1169[SIL]	((((((.((((((((((((.((&))-)))))))))))).))))))	UACUUAUUCAAGCUCUUGCACA&UG-GUAAGAGUUUGAUUAAGUA	2	66.6089	2	0.0286358	Output/S8h/cleaveLand_result/t_plot/PC-3p-1355_7915_XM_016085152.2_1174_TPlot.pdf	2	60.562	2	0.0302541	Output/S0h/cleaveLand_result/t_plot/PC-3p-1355_7915_XM_016085152.2_1174_TPlot.pdf	66.6089	60.562	0.137303	up	0.5918	0.618394	yes	GO:0050789(regulation of biological process);GO:0051171(regulation of nitrogen compound metabolic process);GO:0003700(DNA binding transcription factor activity);GO:0010468(regulation of gene expression);GO:0043229(intracellular organelle);GO:0005623(cell);GO:0050794(regulation of cellular process);GO:0043565(sequence-specific DNA binding);GO:0044464(cell part);GO:0065007(biological regulation);GO…	ko04075(Plant hormone signal transduction)
PC-3p-1355_7915	XM_016085157.2	1149	1170	1160	-29.6	-23.9	0.807432	5	1-2,1170-1169;3-14,1167-1156;16-21,1154-1149	x-x,1168-1168[BULt];15-15,1155-1155[SIL]	((((((.((((((((((((.((&))-)))))))))))).))))))	UACUUAUUCAAGCUCUUGCACA&UG-GUAAGAGUUUGAUUAAGUA	1	33.3045	4	0.0618262	Output/S8h/cleaveLand_result/t_plot/PC-3p-1355_7915_XM_016085157.2_1160_TPlot.pdf	0	0	NA	NA	NA	33.3045	0	Inf	up	7.8779e-09	1.42259e-08	yes	GO:0050789(regulation of biological process);GO:0051171(regulation of nitrogen compound metabolic process);GO:0003700(DNA binding transcription factor activity);GO:0010468(regulation of gene expression);GO:0043229(intracellular organelle);GO:0005623(cell);GO:0050794(regulation of cellular process);GO:0043565(sequence-specific DNA binding);GO:0044464(cell part);GO:0065007(biological regulation);GO…	ko04075(Plant hormone signal transduction)
PC-3p-1355_7915	XM_016085163.2	1286	1307	1297	-29.6	-23.9	0.807432	5	1-2,1307-1306;3-14,1304-1293;16-21,1291-1286	x-x,1305-1305[BULt];15-15,1292-1292[SIL]	((((((.((((((((((((.((&))-)))))))))))).))))))	UACUUAUUCAAGCUCUUGCACA&UG-GUAAGAGUUUGAUUAAGUA	1	33.3045	4	0.100905	Output/S8h/cleaveLand_result/t_plot/PC-3p-1355_7915_XM_016085163.2_1297_TPlot.pdf	0	0	NA	NA	NA	33.3045	0	Inf	up	7.8779e-09	1.42259e-08	yes	GO:0050789(regulation of biological process);GO:0051171(regulation of nitrogen compound metabolic process);GO:0003700(DNA binding transcription factor activity);GO:0010468(regulation of gene expression);GO:0043229(intracellular organelle);GO:0005623(cell);GO:0050794(regulation of cellular process);GO:0043565(sequence-specific DNA binding);GO:0044464(cell part);GO:0065007(biological regulation);GO…	ko04075(Plant hormone signal transduction)
PC-3p-1355_7915	XM_016086710.2	2932	2952	2943	-29.6	-19.7	0.665541	8.5	3-18,2950-2935	1-2,2952-2951[UP5];19-21,2934-2932[UP3]	...((((((((((((((((..&..))))))))))))))))...	CCAUUAGUCAAGCUCUUAUAU&UGGUAAGAGUUUGAUUAAGUA	0	0	NA	NA	NA	1	30.281	4	0.999942	Output/S0h/cleaveLand_result/t_plot/PC-3p-1355_7915_XM_016086710.2_2943_TPlot.pdf	0	30.281	-Inf	down	3.7368e-08	4.29087e-08	yes	GO:0016887(ATPase activity);GO:0009058(biosynthetic process);GO:1901566(organonitrogen compound biosynthetic process);GO:1901293(nucleoside phosphate biosynthetic process);GO:0032553(ribonucleotide binding);GO:0009127(purine nucleoside monophosphate biosynthetic process);GO:0055086(nucleobase-containing small molecule metabolic process);GO:0055085(transmembrane transport);GO:0003824(catalytic act…	ko00190(Oxidative phosphorylation)
PC-3p-1355_7915	XM_016086725.2	2849	2869	2860	-29.6	-19.7	0.665541	8.5	3-18,2867-2852	1-2,2869-2868[UP5];19-21,2851-2849[UP3]	...((((((((((((((((..&..))))))))))))))))...	CCAUUAGUCAAGCUCUUAUAU&UGGUAAGAGUUUGAUUAAGUA	0	0	NA	NA	NA	1	30.281	4	0.999956	Output/S0h/cleaveLand_result/t_plot/PC-3p-1355_7915_XM_016086725.2_2860_TPlot.pdf	0	30.281	-Inf	down	3.7368e-08	4.29087e-08	yes	GO:0016887(ATPase activity);GO:0009058(biosynthetic process);GO:1901566(organonitrogen compound biosynthetic process);GO:1901293(nucleoside phosphate biosynthetic process);GO:0032553(ribonucleotide binding);GO:0009127(purine nucleoside monophosphate biosynthetic process);GO:0055086(nucleobase-containing small molecule metabolic process);GO:0055085(transmembrane transport);GO:0003824(catalytic act…	ko00190(Oxidative phosphorylation)
PC-3p-1355_7915	XM_016087976.2	2586	2608	2599	-29.6	-19.48	0.658108	9	2-13,2607-2596;16-21,2591-2586	1-1,2608-2608[UP5];14-15,2595-2592[AILt]	((((((....((((((((((((.&.))))))))))))--..))))))	UGCUUGUUUACGAAUUCUUGCCG&UGGUAAGAGUUUG--AUUAAGUA	3	99.9134	2	0.981048	Output/S8h/cleaveLand_result/t_plot/PC-3p-1355_7915_XM_016087976.2_2599_TPlot.pdf	1	30.281	4	0.999995	Output/S0h/cleaveLand_result/t_plot/PC-3p-1355_7915_XM_016087976.2_2599_TPlot.pdf	99.9134	30.281	1.72227	up	1.0422e-09	4.10813e-09	yes	GO:0032553(ribonucleotide binding);GO:0044425(membrane part);GO:0044260(cellular macromolecule metabolic process);GO:0043412(macromolecule modification);GO:0071704(organic substance metabolic process);GO:0016021(integral component of membrane);GO:0016301(kinase activity);GO:0008152(metabolic process);GO:1901265(nucleoside phosphate binding);GO:0097159(organic cyclic compound binding);GO:0006464(c…	NA
PC-3p-1355_7915	XM_016090528.2	1020	1042	1033	-29.6	-20.5	0.692568	8.5	1-12,1042-1031;13-20,1028-1021	x-x,1030-1029[BULt];21-21,1020-1020[UP3]	.((((((((..((((((((((((&))))))))))))--)))))))).	AACUUAAUUUAAAGCUUUUGCCA&UGGUAAGAGUUU--GAUUAAGUA	1	33.3045	4	0.987767	Output/S8h/cleaveLand_result/t_plot/PC-3p-1355_7915_XM_016090528.2_1033_TPlot.pdf	0	0	NA	NA	NA	33.3045	0	Inf	up	7.8779e-09	1.42259e-08	yes	GO:0016020(membrane)	NA
PC-3p-1355_7915	XM_016095773.2	723	743	734	-29.6	-19.9	0.672297	10	2-16,742-728	1-1,743-743[UP5];17-21,727-723[UP3]	.....(((((((((((((((.&.))))))))))))))).....	GUAAAGGUCAAGCUCUUGCUU&UGGUAAGAGUUUGAUUAAGUA	1	33.3045	4	0.999566	Output/S8h/cleaveLand_result/t_plot/PC-3p-1355_7915_XM_016095773.2_734_TPlot.pdf	0	0	NA	NA	NA	33.3045	0	Inf	up	7.8779e-09	1.42259e-08	yes	GO:0006796(phosphate-containing compound metabolic process);GO:0043167(ion binding);GO:0009311(oligosaccharide metabolic process);GO:0046351(disaccharide biosynthetic process);GO:0009987(cellular process);GO:0016311(dephosphorylation);GO:0005985(sucrose metabolic process);GO:0008152(metabolic process);GO:0043169(cation binding);GO:0003824(catalytic activity);GO:0044238(primary metabolic process);…	ko00500(Starch and sucrose metabolism)
PC-3p-1355_7915	XM_016096452.2	429	449	440	-29.6	-19.7	0.665541	9	1-13,449-437	14-21,436-429[UP3]	........(((((((((((((&)))))))))))))........	UUCUCAAACAGACUCUUACCA&UGGUAAGAGUUUGAUUAAGUA	1	33.3045	4	0.999834	Output/S8h/cleaveLand_result/t_plot/PC-3p-1355_7915_XM_016096452.2_440_TPlot.pdf	0	0	NA	NA	NA	33.3045	0	Inf	up	7.8779e-09	1.42259e-08	yes	GO:0043231(intracellular membrane-bounded organelle);GO:0003677(DNA binding);GO:0005623(cell);GO:0043226(organelle);GO:0003676(nucleic acid binding);GO:0005488(binding);GO:0005622(intracellular);GO:0043229(intracellular organelle);GO:0097159(organic cyclic compound binding);GO:0044424(intracellular part);GO:0044464(cell part);GO:0043227(membrane-bounded organelle);GO:0005634(nucleus);GO:0003700(D…	ko04016(MAPK signaling pathway - plant)
PC-3p-1355_7915	XM_016097384.2	676	696	687	-29.6	-20.4	0.689189	8	2-4,695-693;6-19,691-678	1-1,696-696[UP5];5-5,692-692[SIL];20-21,677-676[UP3]	..((((((((((((((.(((.&.))).))))))))))))))..	AUCUUAAUCGAGCUCUAACUG&UGGUAAGAGUUUGAUUAAGUA	0	0	NA	NA	NA	1	30.281	4	0.994159	Output/S0h/cleaveLand_result/t_plot/PC-3p-1355_7915_XM_016097384.2_687_TPlot.pdf	0	30.281	-Inf	down	3.7368e-08	4.29087e-08	yes	GO:0005488(binding);GO:0043167(ion binding);GO:0043169(cation binding);GO:0046872(metal ion binding)	NA
PC-3p-1355_7915	XM_016104429.2	823	846	837	-29.6	-19.7	0.665541	11.5	2-11,845-836;12-18,832-826	1-1,846-846[UP5];x-x,835-833[BULt];19-21,825-823[UP3]	...(((((((...((((((((((.&.))))))))))---)))))))...	AGAUUGAUCAGUCAGCUCUUACCG&UGGUAAGAGUU---UGAUUAAGUA	0	0	NA	NA	NA	1	30.281	4	0.999925	Output/S0h/cleaveLand_result/t_plot/PC-3p-1355_7915_XM_016104429.2_837_TPlot.pdf	0	30.281	-Inf	down	3.7368e-08	4.29087e-08	yes	GO:0009987(cellular process);GO:0009123(nucleoside monophosphate metabolic process);GO:0017111(nucleoside-triphosphatase activity);GO:0006164(purine nucleotide biosynthetic process);GO:0043492(ATPase activity, coupled to movement of substances);GO:0009124(nucleoside monophosphate biosynthetic process);GO:0071704(organic substance metabolic process);GO:0005488(binding);GO:0019693(ribose phosphate …	ko00190(Oxidative phosphorylation)
PC-3p-1355_7915	XM_016105870.2	329	349	340	-29.6	-19.4	0.655405	7	2-14,348-336;16-21,334-329	1-1,349-349[UP5];15-15,335-335[SIL]	((((((.(((((((((((((.&.))))))))))))).))))))	UAUUUGUUCAAGCUUUUGCUG&UGGUAAGAGUUUGAUUAAGUA	3	99.9134	2	0.983004	Output/S8h/cleaveLand_result/t_plot/PC-3p-1355_7915_XM_016105870.2_340_TPlot.pdf	0	0	NA	NA	NA	99.9134	0	Inf	up	1.5881e-23	2.42062e-22	yes	GO:0000166(nucleotide binding);GO:0043167(ion binding);GO:0007154(cell communication);GO:0036094(small molecule binding);GO:0035556(intracellular signal transduction);GO:0005488(binding);GO:1901265(nucleoside phosphate binding);GO:0005525(GTP binding);GO:0097367(carbohydrate derivative binding);GO:0050789(regulation of biological process);GO:0065007(biological regulation);GO:0043168(anion binding…	NA
PC-3p-1355_7915	XM_016107051.2	202	223	214	-29.6	-19.9	0.672297	6	1-10,223-214;12-16,211-207;19-21,204-202	11-11,213-212[AILt];17-18,206-205[SIL]	(((..(((((..((((((((((&))))))))))-.)))))..)))	UACCAAAUCAUCACUCUUACCA&UGGUAAGAGU-UUGAUUAAGUA	1	33.3045	4	0.999734	Output/S8h/cleaveLand_result/t_plot/PC-3p-1355_7915_XM_016107051.2_214_TPlot.pdf	0	0	NA	NA	NA	33.3045	0	Inf	up	7.8779e-09	1.42259e-08	yes	GO:0044464(cell part);GO:0016853(isomerase activity);GO:0005622(intracellular);GO:0009536(plastid);GO:0005623(cell);GO:0043227(membrane-bounded organelle);GO:0044444(cytoplasmic part);GO:0043229(intracellular organelle);GO:0043226(organelle);GO:0005737(cytoplasm);GO:0009507(chloroplast);GO:0003824(catalytic activity);GO:0044424(intracellular part);GO:0043231(intracellular membrane-bounded organel…	ko01110(Biosynthesis of secondary metabolites);ko01100(Metabolic pathways);ko00592(alpha-Linolenic acid metabolism)
PC-3p-1355_7915	XM_016110755.2	860	882	871	-29.6	-19.26	0.650676	12	1-3,882-880;7-20,874-861	4-6,879-875[AILt];21-21,860-860[UP3]	.((((((((((((((.....(((&)))--...)))))))))))))).	AACUUAAUCAAAUUCGAAUUCCA&UGG--UAAGAGUUUGAUUAAGUA	10	333.045	2	0.993044	Output/S8h/cleaveLand_result/t_plot/PC-3p-1355_7915_XM_016110755.2_871_TPlot.pdf	4	121.124	2	0.99477	Output/S0h/cleaveLand_result/t_plot/PC-3p-1355_7915_XM_016110755.2_871_TPlot.pdf	333.045	121.124	1.45923	up	2.6461e-23	4.00915e-22	yes	GO:0003824(catalytic activity);GO:0000287(magnesium ion binding);GO:0043169(cation binding);GO:0005488(binding);GO:0043168(anion binding);GO:1901363(heterocyclic compound binding);GO:0019842(vitamin binding);GO:0097159(organic cyclic compound binding);GO:0030976(thiamine pyrophosphate binding);GO:0036094(small molecule binding);GO:0046872(metal ion binding);GO:1901681(sulfur compound binding);GO:…	ko04146(Peroxisome)
PC-3p-1355_7915	XM_016113188.2	217	240	231	-29.6	-19.32	0.652703	9	2-15,239-226;18-21,220-217	1-1,240-240[UP5];16-17,225-221[AILt]	((((.....((((((((((((((.&.))))))))))))))---..))))	UGCUCAAAUAUUGAACUCUUGCCG&UGGUAAGAGUUUGAU---UAAGUA	0	0	NA	NA	NA	2	60.562	2	0.989398	Output/S0h/cleaveLand_result/t_plot/PC-3p-1355_7915_XM_016113188.2_231_TPlot.pdf	0	60.562	-Inf	down	7.123e-15	2.99612e-14	yes	NA	NA
PC-3p-1355_7915	XM_016117018.2	553	573	564	-29.6	-19.5	0.658784	9	4-16,570-558;18-21,556-553	1-3,573-571[UP5];17-17,557-557[SIL]	((((.(((((((((((((...&...))))))))))))).))))	UGCUCGAUCAAGCUCUUGAUG&UGGUAAGAGUUUGAUUAAGUA	0	0	NA	NA	NA	1	30.281	4	0.999992	Output/S0h/cleaveLand_result/t_plot/PC-3p-1355_7915_XM_016117018.2_564_TPlot.pdf	0	30.281	-Inf	down	3.7368e-08	4.29087e-08	yes	NA	NA
PC-3p-1355_7915	XM_016117345.2	2392	2412	2403	-29.6	-20.8	0.702703	9	1-14,2412-2399	15-21,2398-2392[UP3]	.......((((((((((((((&)))))))))))))).......	ACCCCCUUCAGGCUCUUACCA&UGGUAAGAGUUUGAUUAAGUA	0	0	NA	NA	NA	1	30.281	4	0.960039	Output/S0h/cleaveLand_result/t_plot/PC-3p-1355_7915_XM_016117345.2_2403_TPlot.pdf	0	30.281	-Inf	down	3.7368e-08	4.29087e-08	yes	NA	ko00240(Pyrimidine metabolism);ko01100(Metabolic pathways);ko03010(Ribosome)
PC-3p-1355_7915	XM_021125929.1	1011	1030	1021	-29.6	-19.9	0.672297	7.5	1-10,1030-1021;13-13,1019-1019;16-21,1016-1011	11-12,1020-1020[AILq];14-15,1018-1017[SIL]	((((((..(.-((((((((((&))))))))))..)..))))))	UGCUUAUGCC-ACUCUUGCCA&UGGUAAGAGUUUGAUUAAGUA	0	0	NA	NA	NA	1	30.281	4	0.999791	Output/S0h/cleaveLand_result/t_plot/PC-3p-1355_7915_XM_021125929.1_1021_TPlot.pdf	0	30.281	-Inf	down	3.7368e-08	4.29087e-08	yes	NA	NA
PC-3p-1355_7915	XM_021129324.1	2859	2879	2870	-29.6	-19.7	0.665541	8.5	3-18,2877-2862	1-2,2879-2878[UP5];19-21,2861-2859[UP3]	...((((((((((((((((..&..))))))))))))))))...	CCAUUAGUCAAGCUCUUAUAU&UGGUAAGAGUUUGAUUAAGUA	1	33.3045	4	0.999935	Output/S8h/cleaveLand_result/t_plot/PC-3p-1355_7915_XM_021129324.1_2870_TPlot.pdf	4	121.124	2	0.969167	Output/S0h/cleaveLand_result/t_plot/PC-3p-1355_7915_XM_021129324.1_2870_TPlot.pdf	33.3045	121.124	-1.8627	down	1.5815e-12	6.50417e-12	yes	GO:0016887(ATPase activity);GO:0009058(biosynthetic process);GO:1901566(organonitrogen compound biosynthetic process);GO:1901293(nucleoside phosphate biosynthetic process);GO:0032553(ribonucleotide binding);GO:0009127(purine nucleoside monophosphate biosynthetic process);GO:0055086(nucleobase-containing small molecule metabolic process);GO:0055085(transmembrane transport);GO:0003824(catalytic act…	ko00190(Oxidative phosphorylation)
PC-3p-1355_7915	XM_021132793.1	360	381	371	-29.6	-19.7	0.665541	9	2-4,380-378;5-8,376-373;10-21,371-360	1-1,381-381[UP5];x-x,377-377[BULt];9-9,372-372[SIL]	((((((((((((.((((.(((.&.)))-)))).))))))))))))	UGCUUGAUCAGAGUUUUAGCCC&UGGU-AAGAGUUUGAUUAAGUA	0	0	NA	NA	NA	1	30.281	4	0.999918	Output/S0h/cleaveLand_result/t_plot/PC-3p-1355_7915_XM_021132793.1_371_TPlot.pdf	0	30.281	-Inf	down	3.7368e-08	4.29087e-08	yes	GO:0005622(intracellular);GO:0090304(nucleic acid metabolic process);GO:0008152(metabolic process);GO:0030684(preribosome);GO:0006396(RNA processing);GO:0006139(nucleobase-containing compound metabolic process);GO:0034660(ncRNA metabolic process);GO:0044237(cellular metabolic process);GO:0005623(cell);GO:0009987(cellular process);GO:0006364(rRNA processing);GO:0016072(rRNA metabolic process);GO:0…	ko03008(Ribosome biogenesis in eukaryotes)
PC-3p-1355_7915	XM_021138067.1	1854	1883	1874	-29.6	-19.3	0.652027	14	1-13,1883-1871;14-20,1861-1855	x-x,1870-1862[BULt];21-21,1854-1854[UP3]	.(((((((.........(((((((((((((&)))))))))))))---------))))))).	GGCUUGAUGAAGACAUCCGAACUCUUGCUA&UGGUAAGAGUUUG---------AUUAAGUA	0	0	NA	NA	NA	1	30.281	4	0.999999	Output/S0h/cleaveLand_result/t_plot/PC-3p-1355_7915_XM_021138067.1_1874_TPlot.pdf	0	30.281	-Inf	down	3.7368e-08	4.29087e-08	yes	GO:0098791(Golgi subcompartment);GO:0005622(intracellular);GO:0045229(external encapsulating structure organization);GO:0044431(Golgi apparatus part);GO:0012505(endomembrane system);GO:0098588(bounding membrane of organelle);GO:0005623(cell);GO:0016740(transferase activity);GO:0016043(cellular component organization);GO:0031090(organelle membrane);GO:0044425(membrane part);GO:0016020(membrane);GO…	NA
PC-3p-1355_7915	XM_021140652.1	2040	2061	2051	-29.6	-20.4	0.689189	7	2-8,2060-2054;9-19,2052-2042	1-1,2061-2061[UP5];x-x,2053-2053[BULt];20-21,2041-2040[UP3]	..(((((((((((.(((((((.&.)))))))-)))))))))))..	ACCUUAAUCAAACGUUUUGCCC&UGGUAAGA-GUUUGAUUAAGUA	0	0	NA	NA	NA	2	60.562	2	0.82508	Output/S0h/cleaveLand_result/t_plot/PC-3p-1355_7915_XM_021140652.1_2051_TPlot.pdf	0	60.562	-Inf	down	7.123e-15	2.99612e-14	yes	GO:0043139(5'-3' DNA helicase activity);GO:0005524(ATP binding);GO:0071103(DNA conformation change);GO:0032553(ribonucleotide binding);GO:0032559(adenyl ribonucleotide binding);GO:0030554(adenyl nucleotide binding);GO:0003697(single-stranded DNA binding);GO:0003678(DNA helicase activity);GO:0009058(biosynthetic process);GO:0006139(nucleobase-containing compound metabolic process);GO:0071704(organ…	NA
PC-3p-1355_7915	XM_021142386.1	2714	2735	2726	-29.6	-21.3	0.719595	5	1-12,2735-2724;13-15,2722-2720;17-21,2718-2714	x-x,2723-2723[BULt];16-16,2719-2719[SIL]	(((((.(((.((((((((((((&))))))))))))-))).)))))	UACUUUGUUAAAGCUCUUACCA&UGGUAAGAGUUU-GAUUAAGUA	1	33.3045	4	0.892869	Output/S8h/cleaveLand_result/t_plot/PC-3p-1355_7915_XM_021142386.1_2726_TPlot.pdf	0	0	NA	NA	NA	33.3045	0	Inf	up	7.8779e-09	1.42259e-08	yes	GO:0043231(intracellular membrane-bounded organelle);GO:0043229(intracellular organelle);GO:0005622(intracellular);GO:0044424(intracellular part);GO:0005623(cell);GO:0005634(nucleus);GO:0044464(cell part);GO:0043226(organelle);GO:0005737(cytoplasm);GO:0043227(membrane-bounded organelle)	ko03018(RNA degradation)
PC-3p-1355_7915	XM_021142387.1	2539	2560	2551	-29.6	-21.3	0.719595	5	1-12,2560-2549;13-15,2547-2545;17-21,2543-2539	x-x,2548-2548[BULt];16-16,2544-2544[SIL]	(((((.(((.((((((((((((&))))))))))))-))).)))))	UACUUUGUUAAAGCUCUUACCA&UGGUAAGAGUUU-GAUUAAGUA	1	33.3045	4	0.903679	Output/S8h/cleaveLand_result/t_plot/PC-3p-1355_7915_XM_021142387.1_2551_TPlot.pdf	0	0	NA	NA	NA	33.3045	0	Inf	up	7.8779e-09	1.42259e-08	yes	GO:0043231(intracellular membrane-bounded organelle);GO:0043229(intracellular organelle);GO:0005622(intracellular);GO:0044424(intracellular part);GO:0005623(cell);GO:0005634(nucleus);GO:0044464(cell part);GO:0043226(organelle);GO:0005737(cytoplasm);GO:0043227(membrane-bounded organelle)	ko03018(RNA degradation)
PC-3p-139105_48	BGI_novel_T001355	262	287	279	-46.1	-31	0.672451	13	1-2,287-286;4-4,285-285;6-11,283-278;12-23,274-263	3-3,x-x[BULq];5-5,284-284[SIL];x-x,277-275[BULt];24-24,262-262[UP3]	.((((((((((((...((((((.(-((&)).).))))))---)))))))))))).	UGGGUGCGAGUCGGAAGCUUCAGG-GA&UCACGUGAAGU---CGACUUGCACCUG	1	33.3045	4	0.754398	Output/S8h/cleaveLand_result/t_plot/PC-3p-139105_48_BGI_novel_T001355_279_TPlot.pdf	0	0	NA	NA	NA	33.3045	0	Inf	up	7.8779e-09	1.42259e-08	yes	GO:2000112(regulation of cellular macromolecule biosynthetic process);GO:0044464(cell part);GO:0051246(regulation of protein metabolic process);GO:0044248(cellular catabolic process);GO:0043228(non-membrane-bounded organelle);GO:0005737(cytoplasm);GO:0019439(aromatic compound catabolic process);GO:0006139(nucleobase-containing compound metabolic process);GO:0043170(macromolecule metabolic process…	ko03018(RNA degradation)
PC-3p-139105_48	XM_016115562.2	203	228	220	-46.1	-31	0.672451	13	1-2,228-227;4-4,226-226;6-11,224-219;12-23,215-204	3-3,x-x[BULq];5-5,225-225[SIL];x-x,218-216[BULt];24-24,203-203[UP3]	.((((((((((((...((((((.(-((&)).).))))))---)))))))))))).	UGGGUGCGAGUCGGAAGCUUCAGG-GA&UCACGUGAAGU---CGACUUGCACCUG	1	33.3045	4	0.749117	Output/S8h/cleaveLand_result/t_plot/PC-3p-139105_48_XM_016115562.2_220_TPlot.pdf	0	0	NA	NA	NA	33.3045	0	Inf	up	7.8779e-09	1.42259e-08	yes	GO:0051248(negative regulation of protein metabolic process);GO:0090304(nucleic acid metabolic process);GO:0048523(negative regulation of cellular process);GO:0016070(RNA metabolic process);GO:0030529(intracellular ribonucleoprotein complex);GO:0009890(negative regulation of biosynthetic process);GO:0010629(negative regulation of gene expression);GO:2001141(regulation of RNA biosynthetic process)…	ko03018(RNA degradation)
PC-3p-141131_47	BGI_novel_T000350	6884	6906	6897	-38.6	-25.3	0.65544	11.5	5-18,6902-6889;20-22,6888-6886	1-4,6906-6903[UP5];19-19,x-x[BULq];23-24,6885-6884[UP3]	..(((-((((((((((((((....&....)))))))))))))).)))..	AAUCC-UGCUAACAUGCCAUCGCC&AUAAAUGGUAUGUUGGCACGGAAU	0	0	NA	NA	NA	1	30.281	4	0.908602	Output/S0h/cleaveLand_result/t_plot/PC-3p-141131_47_BGI_novel_T000350_6897_TPlot.pdf	0	30.281	-Inf	down	3.7368e-08	4.29087e-08	yes	NA	NA
PC-3p-141131_47	BGI_novel_T006447	4432	4459	4450	-38.6	-25.2	0.65285	18.5	5-10,4455-4450;11-22,4445-4434	1-4,4459-4456[UP5];x-x,4449-4446[BULt];23-24,4433-4432[UP3]	..((((((((((((....((((((....&....))))))----))))))))))))..	AAUCUGUGCCGGCACAACUACCAUCAAU&AUAAAUGGUA----UGUUGGCACGGAAU	0	0	NA	NA	NA	1	30.281	4	0.928532	Output/S0h/cleaveLand_result/t_plot/PC-3p-141131_47_BGI_novel_T006447_4450_TPlot.pdf	0	30.281	-Inf	down	3.7368e-08	4.29087e-08	yes	NA	ko00230(Purine metabolism);ko01100(Metabolic pathways);ko03020(RNA polymerase);ko00040(Pentose and glucuronate interconversions);ko00240(Pyrimidine metabolism)
PC-3p-141131_47	BGI_novel_T008723	2944	2967	2958	-38.6	-26.7	0.69171	14	6-12,2962-2956;14-21,2954-2947	1-5,2967-2963[UP5];13-13,2955-2955[SIL];22-24,2946-2944[UP3]	...((((((((.(((((((.....&.....))))))).))))))))...	UCGCCGUGCCAUCAUACCGGCUGC&AUAAAUGGUAUGUUGGCACGGAAU	1	33.3045	4	0.471758	Output/S8h/cleaveLand_result/t_plot/PC-3p-141131_47_BGI_novel_T008723_2958_TPlot.pdf	0	0	NA	NA	NA	33.3045	0	Inf	up	7.8779e-09	1.42259e-08	yes	NA	NA
PC-3p-141131_47	XM_016084691.2	758	781	772	-38.6	-26	0.673575	18	8-21,774-761	1-7,781-775[UP5];22-24,760-758[UP3]	...((((((((((((((.......&.......))))))))))))))...	UCGCCGUGCCGGCGUACAUGGCUG&AUAAAUGGUAUGUUGGCACGGAAU	1	33.3045	4	0.654813	Output/S8h/cleaveLand_result/t_plot/PC-3p-141131_47_XM_016084691.2_772_TPlot.pdf	1	30.281	4	0.67307	Output/S0h/cleaveLand_result/t_plot/PC-3p-141131_47_XM_016084691.2_772_TPlot.pdf	33.3045	30.281	0.137303	up	0.70456	0.704918	yes	NA	NA
PC-3p-141131_47	XM_016101905.2	531	554	545	-38.6	-27.8	0.720207	9.5	3-8,552-547;11-22,544-533	1-2,554-553[UP5];9-10,546-545[SIL];23-24,532-531[UP3]	..((((((((((((..((((((..&..))))))..))))))))))))..	CAUCUGUGCCAACACUCCAUUUCU&AUAAAUGGUAUGUUGGCACGGAAU	1	33.3045	4	0.138356	Output/S8h/cleaveLand_result/t_plot/PC-3p-141131_47_XM_016101905.2_545_TPlot.pdf	0	0	NA	NA	NA	33.3045	0	Inf	up	7.8779e-09	1.42259e-08	yes	GO:0045454(cell redox homeostasis);GO:0055114(oxidation-reduction process);GO:0050794(regulation of cellular process);GO:0065008(regulation of biological quality);GO:0006662(glycerol ether metabolic process);GO:0050789(regulation of biological process);GO:0065007(biological regulation);GO:0003824(catalytic activity);GO:0071704(organic substance metabolic process);GO:0015035(protein disulfide oxid…	NA
PC-3p-141131_47	XM_021127480.1	1007	1034	1025	-38.6	-25.6	0.663212	15.5	5-15,1030-1020;16-23,1015-1008	1-4,1034-1031[UP5];x-x,1019-1016[BULt];24-24,1007-1007[UP3]	.((((((((....(((((((((((....&....)))))))))))----)))))))).	UUUCCGUGCUAAGCAGCGUGCUAUGGAA&AUAAAUGGUAUGUUG----GCACGGAAU	1	33.3045	4	0.805641	Output/S8h/cleaveLand_result/t_plot/PC-3p-141131_47_XM_021127480.1_1025_TPlot.pdf	0	0	NA	NA	NA	33.3045	0	Inf	up	7.8779e-09	1.42259e-08	yes	NA	NA
PC-3p-145480_44	XM_016078953.2	596	618	609	-43.2	-30.1	0.696759	8	3-13,616-606;16-23,604-597	1-2,618-617[UP5];14-15,605-605[AILq];24-24,596-596[UP3]	.((((((((.-(((((((((((..&..)))))))))))..)))))))).	UGUGCCUGAA-UUGGGGUCAGGUU&AUUCUGACCCCAACGUUAGGUACU	2	66.6089	2	0.0495733	Output/S8h/cleaveLand_result/t_plot/PC-3p-145480_44_XM_016078953.2_609_TPlot.pdf	0	0	NA	NA	NA	66.6089	0	Inf	up	3.3071e-16	2.0359e-15	yes	GO:0043565(sequence-specific DNA binding);GO:0043227(membrane-bounded organelle);GO:0003677(DNA binding);GO:0010468(regulation of gene expression);GO:0080090(regulation of primary metabolic process);GO:0005488(binding);GO:0051171(regulation of nitrogen compound metabolic process);GO:0043226(organelle);GO:0031326(regulation of cellular biosynthetic process);GO:0019222(regulation of metabolic proce…	ko04075(Plant hormone signal transduction)
PC-3p-145480_44	XM_016088498.2	968	992	983	-43.2	-28.8	0.666667	10	3-10,990-983;11-22,981-970	1-2,992-991[UP5];x-x,982-982[BULt];23-24,969-968[UP3]	..((((((((((((.((((((((..&..))))))))-))))))))))))..	UAUAUCUGACGUUGAGGGUUAGGCA&AUUCUGACCC-CAACGUUAGGUACU	1	33.3045	4	0.25757	Output/S8h/cleaveLand_result/t_plot/PC-3p-145480_44_XM_016088498.2_983_TPlot.pdf	1	30.281	4	0.268781	Output/S0h/cleaveLand_result/t_plot/PC-3p-145480_44_XM_016088498.2_983_TPlot.pdf	33.3045	30.281	0.137303	up	0.70456	0.704918	yes	GO:0016021(integral component of membrane);GO:0044425(membrane part);GO:0016020(membrane);GO:0031224(intrinsic component of membrane)	NA
[truncated: 17,195 more rows]
