# Supplementary material for: Integration of Small RNA and Degradome Sequencing Reveals the Regulatory Network of Al-Induced Programmed Cell Death in Peanut
Source: Int J Mol Sci. 2021 Dec 27;23(1):246. doi: 10.3390/ijms23010246 (PMC8745729; doi:10.3390/ijms23010246)
Supplement: Supplementary file 1 [file ijms-23-00246-s001.zip › Table S5-7 The predicted targets of known and novel miRNAs in S24hvsS0h.xlsx]

## Sheet: S0hvsS24h
Table S5-7 The predicted targets of known and novel miRNAs in S24hvsS0h
Item	Description
TStart	Start position of mRNA and miRNA alignment region
TStop	End position of mRNA and miRNA alignment region
TSlice	Degradation site
AllenScore	Penalty score of mismatched bases between the miRNA and its target (the lower the value, the better)
Paired	Paired position (format is miRNA (5 '- 3'), mRNA (3 '- 5'), " ;" for segmentation.)
Unpaired	Unpaired position
Structure	Secondary structure
DegradomeCategory	Category 0:over one raw read at the position, abundance at the position is equal to the maximum on the transcript, and there is only one maximum on the transcript
	Category 1:over one raw read at the position, abundance at the position is equal to the maximum on the transcript, and there is more than one maximum position on the transcript
	Category 2:over one raw read at the position, abundance at position is less than the maximum but higher than the median for the transcript
	Category 3:over one raw read at the position, abundance at the position is equal to or less than the median for the transcript
	Category 4:only one raw read at the position
Query	Transcript	TStart	TStop	TSlice	MFEperfect	MFEsite	MFEratio	AllenScore	Paired	Unpaired	Structure	Sequence	DegradomeRawReads(S24h)	DegradomeNormReads(S24h)	DegradomeCategory(S24h)	DegradomePval(S24h)	Tplot_file_path(S24h)	DegradomeRawReads(S0h)	DegradomeNormReads(S0h)	DegradomeCategory(S0h)	DegradomePval(S0h)	Tplot_file_path(S0h)	S24h	S0h	log2(fold_change)	regulation	pvalue	qvalue	significant	GO	KEGG
PC-3p-100264_81	BGI_novel_T007846	2931	2962	2953	-52.3	-35.8	0.684512	10.5	1-14,2962-2949;15-16,2946-2945;17-18,2943-2942;19-24,2936-2931	x-x,2948-2947[BULt];x-x,2944-2944[BULt];x-x,2941-2937[BULt]	((((((.....((.((..((((((((((((((&))))))))))))))--))-))-----))))))	GGCUAUGAAAUGGAGCAUCAGGCUGAGGCCAG&UUGGCCUUAGCCUG--GC-CU-----GUAGCC	1	26.8255	4	0.791273	Output/S24h/cleaveLand_result/t_plot/PC-3p-100264_81_BGI_novel_T007846_2953_TPlot.pdf	0	0	NA	NA	NA	26.8255	0	Inf	up	2.2264e-07	2.56268e-07	yes	GO:0044238(primary metabolic process);GO:0044260(cellular macromolecule metabolic process);GO:0043231(intracellular membrane-bounded organelle);GO:0016311(dephosphorylation);GO:0043226(organelle);GO:0005622(intracellular);GO:0044267(cellular protein metabolic process);GO:0043412(macromolecule modification);GO:0005623(cell);GO:0004721(phosphoprotein phosphatase activity);GO:0003824(catalytic activ…	ko03013(RNA transport);ko03040(Spliceosome);ko03015(mRNA surveillance pathway)
PC-3p-100264_81	BGI_novel_T007847	2913	2944	2935	-52.3	-35.8	0.684512	10.5	1-14,2944-2931;15-16,2928-2927;17-18,2925-2924;19-24,2918-2913	x-x,2930-2929[BULt];x-x,2926-2926[BULt];x-x,2923-2919[BULt]	((((((.....((.((..((((((((((((((&))))))))))))))--))-))-----))))))	GGCUAUGAAAUGGAGCAUCAGGCUGAGGCCAG&UUGGCCUUAGCCUG--GC-CU-----GUAGCC	2	53.6509	2	0.409529	Output/S24h/cleaveLand_result/t_plot/PC-3p-100264_81_BGI_novel_T007847_2935_TPlot.pdf	0	0	NA	NA	NA	53.6509	0	Inf	up	2.3929e-13	9.82167e-13	yes	GO:0044238(primary metabolic process);GO:0044260(cellular macromolecule metabolic process);GO:0043231(intracellular membrane-bounded organelle);GO:0016311(dephosphorylation);GO:0043226(organelle);GO:0005622(intracellular);GO:0044267(cellular protein metabolic process);GO:0043412(macromolecule modification);GO:0005623(cell);GO:0004721(phosphoprotein phosphatase activity);GO:0003824(catalytic activ…	ko03013(RNA transport);ko03040(Spliceosome);ko03015(mRNA surveillance pathway)
PC-3p-100264_81	BGI_novel_T007848	2913	2944	2935	-52.3	-35.8	0.684512	10.5	1-14,2944-2931;15-16,2928-2927;17-18,2925-2924;19-24,2918-2913	x-x,2930-2929[BULt];x-x,2926-2926[BULt];x-x,2923-2919[BULt]	((((((.....((.((..((((((((((((((&))))))))))))))--))-))-----))))))	GGCUAUGAAAUGGAGCAUCAGGCUGAGGCCAG&UUGGCCUUAGCCUG--GC-CU-----GUAGCC	1	26.8255	4	0.785931	Output/S24h/cleaveLand_result/t_plot/PC-3p-100264_81_BGI_novel_T007848_2935_TPlot.pdf	0	0	NA	NA	NA	26.8255	0	Inf	up	2.2264e-07	2.56268e-07	yes	GO:0044238(primary metabolic process);GO:0044260(cellular macromolecule metabolic process);GO:0043231(intracellular membrane-bounded organelle);GO:0016311(dephosphorylation);GO:0043226(organelle);GO:0005622(intracellular);GO:0044267(cellular protein metabolic process);GO:0043412(macromolecule modification);GO:0005623(cell);GO:0004721(phosphoprotein phosphatase activity);GO:0003824(catalytic activ…	ko03013(RNA transport);ko03040(Spliceosome);ko03015(mRNA surveillance pathway)
PC-3p-100264_81	XM_016078383.2	1779	1801	1792	-52.3	-36	0.688337	5.5	1-9,1801-1793;11-18,1791-1784;20-21,1782-1781;23-24,1780-1779	10-10,1792-1792[SIL];19-19,1783-1783[SIL];22-22,x-x[BULq]	((-((.((((((((.(((((((((&))))))))).)))))))).)).))	GG-UAGAGGCCGGGGUAAGGCUAA&UUGGCCUUAGCCUGGCCUGUAGCC	0	0	NA	NA	NA	1	30.281	4	0.694281	Output/S0h/cleaveLand_result/t_plot/PC-3p-100264_81_XM_016078383.2_1792_TPlot.pdf	0	30.281	-Inf	down	3.7368e-08	6.97196e-08	yes	NA	ko04120(Ubiquitin mediated proteolysis)
PC-3p-100264_81	XM_016079178.2	576	601	592	-52.3	-38.5	0.736138	8.5	2-2,600-600;4-13,598-589;14-20,587-581;22-24,578-576	1-1,601-601[UP5];3-3,599-599[SIL];x-x,588-588[BULt];21-21,580-579[AILt]	(((..(((((((.((((((((((.(.&.).))))))))))-)))))))-.)))	GGCGGGCGGGCCUGGGCUAGGGCGAC&UUGGCCUUAGCCU-GGCCUGU-AGCC	1	26.8255	4	0.261576	Output/S24h/cleaveLand_result/t_plot/PC-3p-100264_81_XM_016079178.2_592_TPlot.pdf	1	30.281	4	0.235338	Output/S0h/cleaveLand_result/t_plot/PC-3p-100264_81_XM_016079178.2_592_TPlot.pdf	26.8255	30.281	-0.17481	down	0.64747	0.647871	yes	GO:0016021(integral component of membrane);GO:0016020(membrane);GO:0044425(membrane part);GO:0031224(intrinsic component of membrane)	NA
PC-3p-100264_81	XM_016080711.2	375	402	392	-52.3	-35.7	0.6826	12	3-5,400-398;6-12,396-390;13-18,388-383;19-23,380-376	1-2,402-401[UP5];x-x,397-397[BULt];x-x,389-389[BULt];x-x,382-381[BULt];24-24,375-375[UP3]	.(((((..((((((.(((((((.(((..&..)))-)))))))-))))))--))))).	AGCUGCUGGGGCCAGGGCUGAGAGCCUC&UUGGC-CUUAGCC-UGGCCU--GUAGCC	1	26.8255	4	0.867554	Output/S24h/cleaveLand_result/t_plot/PC-3p-100264_81_XM_016080711.2_392_TPlot.pdf	0	0	NA	NA	NA	26.8255	0	Inf	up	2.2264e-07	2.56268e-07	yes	NA	NA
PC-3p-100264_81	XM_016082554.2	1544	1567	1558	-52.3	-34.7	0.66348	9	2-8,1566-1560;10-13,1558-1555;16-20,1552-1548;22-24,1546-1544	1-1,1567-1567[UP5];9-9,1559-1559[SIL];14-15,1554-1553[SIL];21-21,1547-1547[SIL]	(((.(((((..((((.(((((((.&.))))))).))))..))))).)))	GGCCGCGGGAAAGGCCGGGGCCAU&UUGGCCUUAGCCUGGCCUGUAGCC	3	80.4764	2	0.727339	Output/S24h/cleaveLand_result/t_plot/PC-3p-100264_81_XM_016082554.2_1558_TPlot.pdf	0	0	NA	NA	NA	80.4764	0	Inf	up	2.9371e-19	3.092e-18	yes	GO:0005215(transporter activity);GO:0022857(transmembrane transporter activity);GO:0015291(secondary active transmembrane transporter activity);GO:0006811(ion transport);GO:0006817(phosphate ion transport);GO:0051234(establishment of localization);GO:0031224(intrinsic component of membrane);GO:0055085(transmembrane transport);GO:0016020(membrane);GO:0015698(inorganic anion transport);GO:0022804(a…	NA
PC-3p-100264_81	XM_016083974.2	1332	1355	1346	-52.3	-34.3	0.655832	11	4-6,1352-1350;8-20,1348-1336;22-23,1334-1333	1-3,1355-1353[UP5];7-7,1349-1349[SIL];21-21,1335-1335[SIL];24-24,1332-1332[UP3]	.((.(((((((((((((.(((...&...))).))))))))))))).)).	CGCGGCAGGUCAGGCUGCGGCAUA&UUGGCCUUAGCCUGGCCUGUAGCC	1	26.8255	4	0.99019	Output/S24h/cleaveLand_result/t_plot/PC-3p-100264_81_XM_016083974.2_1346_TPlot.pdf	0	0	NA	NA	NA	26.8255	0	Inf	up	2.2264e-07	2.56268e-07	yes	GO:0006810(transport);GO:0044425(membrane part);GO:0032559(adenyl ribonucleotide binding);GO:0022857(transmembrane transporter activity);GO:0017076(purine nucleotide binding);GO:0097367(carbohydrate derivative binding);GO:1901363(heterocyclic compound binding);GO:0042626(ATPase activity, coupled to transmembrane movement of substances);GO:0032553(ribonucleotide binding);GO:0000166(nucleotide bind…	ko02010(ABC transporters)
PC-3p-100264_81	XM_016087415.2	1036	1058	1050	-52.3	-34.3	0.655832	9.5	2-8,1057-1051;11-12,1049-1048;14-23,1046-1037	1-1,1058-1058[UP5];9-10,1050-1050[AILq];13-13,1047-1047[SIL];24-24,1036-1036[UP3]	.((((((((((.((.-(((((((.&.)))))))..)).)))))))))).	AGCUGCGGGCUUGGG-GAGGCCAU&UUGGCCUUAGCCUGGCCUGUAGCC	5	134.127	2	0.804694	Output/S24h/cleaveLand_result/t_plot/PC-3p-100264_81_XM_016087415.2_1050_TPlot.pdf	1	30.281	4	0.984377	Output/S0h/cleaveLand_result/t_plot/PC-3p-100264_81_XM_016087415.2_1050_TPlot.pdf	134.127	30.281	2.14712	up	5.5279e-16	5.55711e-15	yes	NA	ko00750(Vitamin B6 metabolism)
PC-3p-100264_81	XM_016099536.2	7829	7853	7843	-52.3	-34.1	0.652008	9	1-5,7853-7849;6-14,7847-7839;16-21,7837-7832;23-24,7830-7829	x-x,7848-7848[BULt];15-15,7838-7838[SIL];22-22,7831-7831[SIL]	((.((((((.(((((((((.(((((&)))))-))))))))).)))))).))	GGGUGCAGGGCAGGUUGAGUGUUAG&UUGGC-CUUAGCCUGGCCUGUAGCC	0	0	NA	NA	NA	2	60.562	2	0.800684	Output/S0h/cleaveLand_result/t_plot/PC-3p-100264_81_XM_016099536.2_7843_TPlot.pdf	0	60.562	-Inf	down	7.123e-15	4.42666e-14	yes	NA	NA
PC-3p-100264_81	XM_016099540.2	7816	7840	7830	-52.3	-34.1	0.652008	9	1-5,7840-7836;6-14,7834-7826;16-21,7824-7819;23-24,7817-7816	x-x,7835-7835[BULt];15-15,7825-7825[SIL];22-22,7818-7818[SIL]	((.((((((.(((((((((.(((((&)))))-))))))))).)))))).))	GGGUGCAGGGCAGGUUGAGUGUUAG&UUGGC-CUUAGCCUGGCCUGUAGCC	0	0	NA	NA	NA	1	30.281	4	0.991067	Output/S0h/cleaveLand_result/t_plot/PC-3p-100264_81_XM_016099540.2_7830_TPlot.pdf	0	30.281	-Inf	down	3.7368e-08	6.97196e-08	yes	NA	NA
PC-3p-100264_81	XM_016100348.2	746	775	761	-52.3	-35.8	0.684512	15.5	2-7,774-769;8-9,763-762;11-14,760-757;15-24,755-746	1-1,775-775[UP5];x-x,768-764[BULt];10-10,761-761[SIL];x-x,756-756[BULt]	((((((((((.((((.((.....((((((.&.))))))-----)).))))-))))))))))	GGCUGCGGGUACAGGGUACUGGAAGGCCAC&UUGGCCU-----UAGCCUG-GCCUGUAGCC	3	80.4764	3	0.137681	Output/S24h/cleaveLand_result/t_plot/PC-3p-100264_81_XM_016100348.2_761_TPlot.pdf	0	0	NA	NA	NA	80.4764	0	Inf	up	2.9371e-19	3.092e-18	yes	GO:0071704(organic substance metabolic process);GO:0044271(cellular nitrogen compound biosynthetic process);GO:1901360(organic cyclic compound metabolic process);GO:0044260(cellular macromolecule metabolic process);GO:0034654(nucleobase-containing compound biosynthetic process);GO:0008152(metabolic process);GO:0034641(cellular nitrogen compound metabolic process);GO:0009059(macromolecule biosynth…	ko03015(mRNA surveillance pathway);ko03018(RNA degradation);ko04120(Ubiquitin mediated proteolysis);ko00561(Glycerolipid metabolism);ko03013(RNA transport);ko01100(Metabolic pathways);ko04141(Protein processing in endoplasmic reticulum)
PC-3p-100264_81	XM_016102022.2	1217	1240	1231	-52.3	-34	0.650096	7.5	2-9,1239-1232;11-20,1230-1221;22-23,1219-1218	1-1,1240-1240[UP5];10-10,1231-1231[SIL];21-21,1220-1220[SIL];24-24,1217-1217[UP3]	.((.((((((((((.((((((((.&.)))))))).)))))))))).)).	UGUAGCAGGUCAGGAUAGGGCCAU&UUGGCCUUAGCCUGGCCUGUAGCC	1	26.8255	4	0.99643	Output/S24h/cleaveLand_result/t_plot/PC-3p-100264_81_XM_016102022.2_1231_TPlot.pdf	0	0	NA	NA	NA	26.8255	0	Inf	up	2.2264e-07	2.56268e-07	yes	NA	ko00511(Other glycan degradation)
PC-3p-100264_81	XM_016102391.2	826	851	840	-52.3	-34.9	0.667304	12.5	3-6,849-846;7-23,843-827	1-2,851-850[UP5];x-x,845-844[BULt];24-24,826-826[UP3]	.(((((((((((((((((..((((..&..))))--))))))))))))))))).	UGUUGCGGGCCAGGUUGAUCGGUCUC&UUGGCC--UUAGCCUGGCCUGUAGCC	0	0	NA	NA	NA	3	90.843	2	0.622958	Output/S0h/cleaveLand_result/t_plot/PC-3p-100264_81_XM_016102391.2_840_TPlot.pdf	0	90.843	-Inf	down	1.5521e-21	2.37866e-20	yes	GO:0043168(anion binding);GO:1901363(heterocyclic compound binding);GO:1901265(nucleoside phosphate binding);GO:0016491(oxidoreductase activity);GO:0097367(carbohydrate derivative binding);GO:0055114(oxidation-reduction process);GO:0010181(FMN binding);GO:0043167(ion binding);GO:0008152(metabolic process);GO:0003824(catalytic activity);GO:0032553(ribonucleotide binding);GO:0048037(cofactor bindin…	ko01110(Biosynthesis of secondary metabolites);ko04146(Peroxisome);ko00630(Glyoxylate and dicarboxylate metabolism);ko01100(Metabolic pathways);ko01200(Carbon metabolism)
PC-3p-100264_81	XM_016103586.2	1592	1615	1607	-52.3	-34.38	0.657361	7.5	1-8,1615-1608;10-15,1607-1602;16-17,1600-1599;21-24,1595-1592	9-9,x-x[BULq];x-x,1601-1601[BULt];18-20,1598-1596[SIL]	((((...((.((((((-((((((((&)))))))).))))))-))...))))	GGCUUGUGGUCCGGGC-AGGGCCAA&UUGGCCUUAGCCUGG-CCUGUAGCC	0	0	NA	NA	NA	1	30.281	4	0.977151	Output/S0h/cleaveLand_result/t_plot/PC-3p-100264_81_XM_016103586.2_1607_TPlot.pdf	0	30.281	-Inf	down	3.7368e-08	6.97196e-08	yes	GO:0003824(catalytic activity);GO:0005886(plasma membrane);GO:0005623(cell);GO:0001871(pattern binding);GO:0044464(cell part);GO:0016021(integral component of membrane);GO:0030246(carbohydrate binding);GO:0016798(hydrolase activity, acting on glycosyl bonds);GO:0044425(membrane part);GO:0044459(plasma membrane part);GO:0030247(polysaccharide binding);GO:0071704(organic substance metabolic process…	ko00500(Starch and sucrose metabolism)
PC-3p-100264_81	XM_016108967.2	207	231	222	-52.3	-37.3	0.713193	7	1-8,231-224;10-12,222-220;14-16,218-216;17-23,214-208	9-9,223-223[SIL];13-13,219-219[SIL];x-x,215-215[BULt];24-24,207-207[UP3]	.(((((((.(((.(((.((((((((&)))))))).))).)))-))))))).	AGCUGCGGUGCCCGGCGGAGGCCAA&UUGGCCUUAGCCUGGC-CUGUAGCC	2	53.6509	3	0.05611	Output/S24h/cleaveLand_result/t_plot/PC-3p-100264_81_XM_016108967.2_222_TPlot.pdf	0	0	NA	NA	NA	53.6509	0	Inf	up	2.3929e-13	9.82167e-13	yes	NA	NA
PC-3p-100264_81	XM_016113267.2	2913	2944	2935	-52.3	-35.8	0.684512	10.5	1-14,2944-2931;15-16,2928-2927;17-18,2925-2924;19-24,2918-2913	x-x,2930-2929[BULt];x-x,2926-2926[BULt];x-x,2923-2919[BULt]	((((((.....((.((..((((((((((((((&))))))))))))))--))-))-----))))))	GGCUAUGAAAUGGAGCAUCAGGCUGAGGCCAG&UUGGCCUUAGCCUG--GC-CU-----GUAGCC	0	0	NA	NA	NA	1	30.281	4	0.790956	Output/S0h/cleaveLand_result/t_plot/PC-3p-100264_81_XM_016113267.2_2935_TPlot.pdf	0	30.281	-Inf	down	3.7368e-08	6.97196e-08	yes	GO:0044238(primary metabolic process);GO:0044260(cellular macromolecule metabolic process);GO:0043231(intracellular membrane-bounded organelle);GO:0016311(dephosphorylation);GO:0043226(organelle);GO:0005622(intracellular);GO:0044267(cellular protein metabolic process);GO:0043412(macromolecule modification);GO:0005623(cell);GO:0004721(phosphoprotein phosphatase activity);GO:0003824(catalytic activ…	ko03013(RNA transport);ko03040(Spliceosome);ko03015(mRNA surveillance pathway)
PC-3p-100264_81	XM_016114588.2	476	499	490	-52.3	-34.6	0.661568	8.5	1-11,499-489;12-13,487-486;15-18,484-481;22-24,478-476	x-x,488-488[BULt];14-14,485-485[SIL];19-21,480-479[AILq]	(((..-((((.((.(((((((((((&)))))))))))-)).))))...)))	GGCGA-GGGCGGGCGUUAAGGCCAG&UUGGCCUUAGC-CUGGCCUGUAGCC	3	80.4764	3	0.312086	Output/S24h/cleaveLand_result/t_plot/PC-3p-100264_81_XM_016114588.2_490_TPlot.pdf	1	30.281	4	0.964266	Output/S0h/cleaveLand_result/t_plot/PC-3p-100264_81_XM_016114588.2_490_TPlot.pdf	80.4764	30.281	1.41015	up	1.8451e-06	2.10209e-06	yes	GO:0046395(carboxylic acid catabolic process);GO:0045548(phenylalanine ammonia-lyase activity);GO:0003824(catalytic activity);GO:0044424(intracellular part);GO:0016840(carbon-nitrogen lyase activity);GO:0009698(phenylpropanoid metabolic process);GO:0006807(nitrogen compound metabolic process);GO:0008152(metabolic process);GO:1901564(organonitrogen compound metabolic process);GO:0009063(cellular a…	ko01100(Metabolic pathways);ko00360(Phenylalanine metabolism);ko00940(Phenylpropanoid biosynthesis);ko01110(Biosynthesis of secondary metabolites)
PC-3p-100264_81	XM_016117981.2	481	505	495	-52.3	-34	0.650096	9	3-6,503-500;7-13,498-492;14-19,490-485;21-24,484-481	1-2,505-504[UP5];x-x,499-499[BULt];x-x,491-491[BULt];20-20,x-x[BULq]	((((-((((((.(((((((.((((..&..))))-)))))))-)))))).))))	GGUU-CGGGCCGAGGCUAACGGCUCC&UUGGCC-UUAGCCU-GGCCUGUAGCC	1	26.8255	4	0.996854	Output/S24h/cleaveLand_result/t_plot/PC-3p-100264_81_XM_016117981.2_495_TPlot.pdf	0	0	NA	NA	NA	26.8255	0	Inf	up	2.2264e-07	2.56268e-07	yes	GO:0005488(binding);GO:0097159(organic cyclic compound binding);GO:1901363(heterocyclic compound binding)	ko03040(Spliceosome)
PC-3p-100264_81	XM_016117982.2	482	506	496	-52.3	-34	0.650096	9	3-6,504-501;7-13,499-493;14-19,491-486;21-24,485-482	1-2,506-505[UP5];x-x,500-500[BULt];x-x,492-492[BULt];20-20,x-x[BULq]	((((-((((((.(((((((.((((..&..))))-)))))))-)))))).))))	GGUU-CGGGCCGAGGCUAACGGCUCC&UUGGCC-UUAGCCU-GGCCUGUAGCC	1	26.8255	4	0.996606	Output/S24h/cleaveLand_result/t_plot/PC-3p-100264_81_XM_016117982.2_496_TPlot.pdf	2	60.562	2	0.822373	Output/S0h/cleaveLand_result/t_plot/PC-3p-100264_81_XM_016117982.2_496_TPlot.pdf	26.8255	60.562	-1.17481	down	0.00030739	0.000341326	yes	GO:0005488(binding);GO:0097159(organic cyclic compound binding);GO:1901363(heterocyclic compound binding)	ko03040(Spliceosome)
PC-3p-100264_81	XM_021127228.1	482	506	496	-52.3	-34	0.650096	9	3-6,504-501;7-13,499-493;14-19,491-486;21-24,485-482	1-2,506-505[UP5];x-x,500-500[BULt];x-x,492-492[BULt];20-20,x-x[BULq]	((((-((((((.(((((((.((((..&..))))-)))))))-)))))).))))	GGUU-CGGGCCGAGGCUAACGGCUCC&UUGGCC-UUAGCCU-GGCCUGUAGCC	0	0	NA	NA	NA	1	30.281	4	0.993612	Output/S0h/cleaveLand_result/t_plot/PC-3p-100264_81_XM_021127228.1_496_TPlot.pdf	0	30.281	-Inf	down	3.7368e-08	6.97196e-08	yes	GO:0005488(binding);GO:0097159(organic cyclic compound binding);GO:1901363(heterocyclic compound binding)	ko03040(Spliceosome)
PC-3p-100264_81	XM_021132109.1	2326	2352	2341	-52.3	-35.2	0.67304	10.5	1-5,2352-2348;6-8,2346-2344;10-13,2341-2338;14-20,2336-2330;22-24,2328-2326	x-x,2347-2347[BULt];9-9,2343-2342[AILt];x-x,2337-2337[BULt];21-21,2329-2329[SIL]	(((.(((((((.((((..(((.(((((&)))))-)))-.))))-))))))).)))	GGCAGCAGGCCGAGGCCGGGGAGCCAA&UUGGC-CUU-AGCCU-GGCCUGUAGCC	0	0	NA	NA	NA	1	30.281	4	0.906536	Output/S0h/cleaveLand_result/t_plot/PC-3p-100264_81_XM_021132109.1_2341_TPlot.pdf	0	30.281	-Inf	down	3.7368e-08	6.97196e-08	yes	GO:0032559(adenyl ribonucleotide binding);GO:0097159(organic cyclic compound binding);GO:0000166(nucleotide binding);GO:0006468(protein phosphorylation);GO:0071704(organic substance metabolic process);GO:0016740(transferase activity);GO:0006464(cellular protein modification process);GO:0006793(phosphorus metabolic process);GO:0044267(cellular protein metabolic process);GO:1901564(organonitrogen c…	NA
PC-3p-100264_81	XM_021138127.1	554	577	568	-52.3	-34.3	0.655832	5.5	1-12,577-566;14-16,565-563;17-18,561-560;20-20,558-558;22-24,556-554	13-13,x-x[BULq];x-x,562-562[BULt];19-19,559-559[SIL];21-21,557-557[SIL]	(((.(.((.(((-((((((((((((&)))))))))))).)))-)).).)))	GGCAAGAGAGCU-GGCUGAGGCCAA&UUGGCCUUAGCCUGGC-CUGUAGCC	1	26.8255	4	0.987047	Output/S24h/cleaveLand_result/t_plot/PC-3p-100264_81_XM_021138127.1_568_TPlot.pdf	0	0	NA	NA	NA	26.8255	0	Inf	up	2.2264e-07	2.56268e-07	yes	GO:0016021(integral component of membrane);GO:0031224(intrinsic component of membrane);GO:0044425(membrane part);GO:0016020(membrane)	NA
PC-3p-100264_81	XM_021142147.1	745	772	762	-52.3	-36.5	0.697897	10	1-6,772-767;8-20,764-752;21-24,748-745	7-7,766-765[AILt];x-x,751-749[BULt]	((((...(((((((((((((..((((((&))))))-.)))))))))))))---))))	GGCUGAAACAGGUCGGGCUGCUGGUCAA&UUGGCC-UUAGCCUGGCCUGU---AGCC	0	0	NA	NA	NA	1	30.281	4	0.60019	Output/S0h/cleaveLand_result/t_plot/PC-3p-100264_81_XM_021142147.1_762_TPlot.pdf	0	30.281	-Inf	down	3.7368e-08	6.97196e-08	yes	NA	NA
PC-3p-101862_79	BGI_novel_T011691	1063	1086	1077	-45.4	-31.2	0.687225	8	1-1,1086-1086;3-4,1084-1083;6-15,1081-1072;18-24,1069-1063	2-2,1085-1085[SIL];5-5,1082-1082[SIL];16-17,1071-1070[SIL]	(((((((..((((((((((.((.(&).)).))))))))))..)))))))	GGGUGGAGGUGGGUGCAGUGGAGU&AGUCGACUGCACCUGAAUUCACCU	0	0	NA	NA	NA	3	90.843	2	0.292214	Output/S0h/cleaveLand_result/t_plot/PC-3p-101862_79_BGI_novel_T011691_1077_TPlot.pdf	0	90.843	-Inf	down	1.5521e-21	2.37866e-20	yes	NA	ko00860(Porphyrin and chlorophyll metabolism);ko00053(Ascorbate and aldarate metabolism);ko00040(Pentose and glucuronate interconversions);ko01110(Biosynthesis of secondary metabolites);ko01100(Metabolic pathways);ko00906(Carotenoid biosynthesis)
PC-3p-101862_79	XM_016080550.2	983	1006	997	-45.4	-29.6	0.651982	7.5	2-13,1005-994;15-16,992-991;18-22,989-985	1-1,1006-1006[UP5];14-14,993-993[SIL];17-17,990-990[SIL];23-24,984-983[UP3]	..(((((.((.((((((((((((.&.)))))))))))).)).)))))..	UCGUGGAAUCCGGUGCAGUUGGCG&AGUCGACUGCACCUGAAUUCACCU	1	26.8255	4	0.883275	Output/S24h/cleaveLand_result/t_plot/PC-3p-101862_79_XM_016080550.2_997_TPlot.pdf	0	0	NA	NA	NA	26.8255	0	Inf	up	2.2264e-07	2.56268e-07	yes	NA	ko04120(Ubiquitin mediated proteolysis)
PC-3p-101862_79	XM_016096771.2	852	878	866	-45.4	-31.5	0.693833	14	1-4,878-875;7-8,872-871;9-23,867-853	5-6,874-873[SIL];x-x,870-868[BULt];24-24,852-852[UP3]	.(((((((((((((((...((..((((&))))..))---))))))))))))))).	CGGUGGAUUCGGGUGCUGCGGAGGGCU&AGUCGACU---GCACCUGAAUUCACCU	0	0	NA	NA	NA	1	30.281	4	0.617676	Output/S0h/cleaveLand_result/t_plot/PC-3p-101862_79_XM_016096771.2_866_TPlot.pdf	0	30.281	-Inf	down	3.7368e-08	6.97196e-08	yes	GO:0044260(cellular macromolecule metabolic process);GO:0006470(protein dephosphorylation);GO:1901564(organonitrogen compound metabolic process);GO:0006807(nitrogen compound metabolic process);GO:0008152(metabolic process);GO:0006796(phosphate-containing compound metabolic process);GO:0016787(hydrolase activity);GO:0009987(cellular process);GO:0044237(cellular metabolic process);GO:0044238(primar…	NA
PC-3p-104925_76	XM_016098876.1	625	647	639	-36.9	-25.9	0.701897	8.5	3-9,645-639;11-13,638-636;16-24,633-625	1-2,647-646[UP5];10-10,x-x[BULq];14-15,635-634[SIL]	(((((((((..(((-(((((((..&..))))))).)))..)))))))))	GAACUCAGGCUCAG-CAGUUUCGG&AUGAAAUUGACUGUACCUGAGUUU	0	0	NA	NA	NA	2	60.562	2	0.525261	Output/S0h/cleaveLand_result/t_plot/PC-3p-104925_76_XM_016098876.1_639_TPlot.pdf	0	60.562	-Inf	down	7.123e-15	4.42666e-14	yes	GO:0016310(phosphorylation);GO:0031224(intrinsic component of membrane);GO:0071704(organic substance metabolic process);GO:0004672(protein kinase activity);GO:0044260(cellular macromolecule metabolic process);GO:0043170(macromolecule metabolic process);GO:0004714(transmembrane receptor protein tyrosine kinase activity);GO:0044425(membrane part);GO:0016773(phosphotransferase activity, alcohol grou…	NA
PC-3p-105086_75	XM_016088691.2	1028	1053	1043	-41.8	-27.2	0.650718	7	1-3,1053-1051;4-16,1049-1037;17-19,1035-1033;21-23,1031-1029	x-x,1050-1050[BULt];x-x,1036-1036[BULt];20-20,1032-1032[SIL];24-24,1028-1028[UP3]	.(((.(((.(((((((((((((.(((&)))-)))))))))))))-))).))).	UACUAAGGUUGUAGUUGACUUCAAUG&CGU-GAAGUCGACUACA-CCUAAGUU	0	0	NA	NA	NA	1	30.281	4	0.642481	Output/S0h/cleaveLand_result/t_plot/PC-3p-105086_75_XM_016088691.2_1043_TPlot.pdf	0	30.281	-Inf	down	3.7368e-08	6.97196e-08	yes	GO:0034641(cellular nitrogen compound metabolic process);GO:0046483(heterocycle metabolic process);GO:0006366(transcription from RNA polymerase II promoter);GO:0009058(biosynthetic process);GO:0006367(transcription initiation from RNA polymerase II promoter);GO:0003723(RNA binding);GO:0009059(macromolecule biosynthetic process);GO:1901576(organic substance biosynthetic process);GO:0003677(DNA bin…	ko03022(Basal transcription factors)
PC-3p-1060_9765	BGI_novel_T002090	361	378	372	-37	-25.22	0.681622	11	1-2,378-377;8-21,374-361	3-7,376-375[AILq]	((((((((((((((..---((&)).....))))))))))))))	UGGCUGUUCUUCUGUU---GG&CCUAUUUCGGAAGAACAGCCA	3	80.4764	2	0.444729	Output/S24h/cleaveLand_result/t_plot/PC-3p-1060_9765_BGI_novel_T002090_372_TPlot.pdf	3	90.843	2	0.402248	Output/S0h/cleaveLand_result/t_plot/PC-3p-1060_9765_BGI_novel_T002090_372_TPlot.pdf	80.4764	90.843	-0.17481	down	0.42833	0.452615	yes	GO:0017171(serine hydrolase activity);GO:0019538(protein metabolic process);GO:0070011(peptidase activity, acting on L-amino acid peptides);GO:0044260(cellular macromolecule metabolic process);GO:0008152(metabolic process);GO:0008236(serine-type peptidase activity);GO:1901565(organonitrogen compound catabolic process);GO:0004185(serine-type carboxypeptidase activity);GO:0044238(primary metabolic …	NA
PC-3p-1060_9765	BGI_novel_T005114	641	662	652	-37	-24.2	0.654054	7	3-8,660-655;9-19,653-643	1-2,662-661[UP5];x-x,654-654[BULt];20-21,642-641[UP3]	..(((((((((((.((((((..&..))))))-)))))))))))..	UCGCUGUUCUUCCAGAAAUACU&CCUAUUUC-GGAAGAACAGCCA	0	0	NA	NA	NA	1	30.281	4	0.991264	Output/S0h/cleaveLand_result/t_plot/PC-3p-1060_9765_BGI_novel_T005114_652_TPlot.pdf	0	30.281	-Inf	down	3.7368e-08	6.97196e-08	yes	NA	NA
PC-3p-1060_9765	BGI_novel_T007984	1056	1078	1069	-37	-25.1	0.678378	8	1-7,1078-1072;9-17,1070-1062;18-20,1059-1057	8-8,1071-1071[SIL];x-x,1061-1060[BULt];21-21,1056-1056[UP3]	.(((..(((((((((.(((((((&))))))).)))))))))--))).	CGGCCGUGUUCUUCUCGAAUGGG&CCUAUUUCGGAAGAACA--GCCA	1	26.8255	4	0.867554	Output/S24h/cleaveLand_result/t_plot/PC-3p-1060_9765_BGI_novel_T007984_1069_TPlot.pdf	0	0	NA	NA	NA	26.8255	0	Inf	up	2.2264e-07	2.56268e-07	yes	GO:0016021(integral component of membrane);GO:0031224(intrinsic component of membrane);GO:0003824(catalytic activity);GO:0016757(transferase activity, transferring glycosyl groups);GO:0044425(membrane part);GO:0016020(membrane);GO:0016740(transferase activity)	ko00514(Other types of O-glycan biosynthesis)
PC-3p-1060_9765	BGI_novel_T009852	672	692	683	-37	-24.9	0.672973	6.5	1-7,692-686;9-14,684-679;16-21,677-672	8-8,685-685[SIL];15-15,678-678[SIL]	((((((.((((((.(((((((&))))))).)))))).))))))	UGGUUGAUCUUCCAAGGUGGG&CCUAUUUCGGAAGAACAGCCA	1	26.8255	4	0.927781	Output/S24h/cleaveLand_result/t_plot/PC-3p-1060_9765_BGI_novel_T009852_683_TPlot.pdf	0	0	NA	NA	NA	26.8255	0	Inf	up	2.2264e-07	2.56268e-07	yes	GO:0005524(ATP binding);GO:0032559(adenyl ribonucleotide binding);GO:0004672(protein kinase activity);GO:0031224(intrinsic component of membrane);GO:0016020(membrane);GO:0032555(purine ribonucleotide binding);GO:0016301(kinase activity);GO:0000166(nucleotide binding);GO:0016773(phosphotransferase activity, alcohol group as acceptor);GO:0043167(ion binding);GO:0036094(small molecule binding);GO:00…	NA
PC-3p-1060_9765	XM_016080955.2	1075	1094	1085	-37	-25.6	0.691892	6.5	1-3,1094-1092;5-14,1090-1081;16-20,1080-1076	4-4,1091-1091[SIL];15-15,x-x[BULq];21-21,1075-1075[UP3]	.(((((-((((((((((.(((&))).)))))))))).))))).	CGGCUG-UUUUCCGGAGGAGG&CCUAUUUCGGAAGAACAGCCA	0	0	NA	NA	NA	1	30.281	4	0.680299	Output/S0h/cleaveLand_result/t_plot/PC-3p-1060_9765_XM_016080955.2_1085_TPlot.pdf	0	30.281	-Inf	down	3.7368e-08	6.97196e-08	yes	GO:0080090(regulation of primary metabolic process);GO:0003700(DNA binding transcription factor activity);GO:0031323(regulation of cellular metabolic process);GO:0019222(regulation of metabolic process);GO:1901363(heterocyclic compound binding);GO:0010556(regulation of macromolecule biosynthetic process);GO:0003677(DNA binding);GO:0050789(regulation of biological process);GO:0006355(regulation of…	ko04626(Plant-pathogen interaction);ko04016(MAPK signaling pathway - plant)
PC-3p-1060_9765	XM_016082100.2	414	442	425	-37	-26.1	0.705405	18.5	1-6,442-437;7-8,429-428;9-21,426-414	x-x,436-430[BULt];x-x,427-427[BULt]	(((((((((((((.((.......((((((&))))))-------))-)))))))))))))	UGGCUGUUUUUCCUGAAUCACUGGAUGGG&CCUAUU-------UC-GGAAGAACAGCCA	2	53.6509	3	0.05611	Output/S24h/cleaveLand_result/t_plot/PC-3p-1060_9765_XM_016082100.2_425_TPlot.pdf	1	30.281	4	0.402071	Output/S0h/cleaveLand_result/t_plot/PC-3p-1060_9765_XM_016082100.2_425_TPlot.pdf	53.6509	30.281	0.82519	up	0.010743	0.0115483	yes	NA	NA
PC-3p-1060_9765	XM_016086108.2	1274	1294	1284	-37	-24.32	0.657297	11	1-3,1294-1292;7-16,1287-1278;18-20,1277-1275	4-6,1291-1288[AILt];17-17,x-x[BULq];21-21,1274-1274[UP3]	.(((-((((((((((....(((&)))-...)))))))))).))).	CGGC-GUUCUUCCGGCGAGAGG&CCU-AUUUCGGAAGAACAGCCA	1	26.8255	4	0.987992	Output/S24h/cleaveLand_result/t_plot/PC-3p-1060_9765_XM_016086108.2_1284_TPlot.pdf	0	0	NA	NA	NA	26.8255	0	Inf	up	2.2264e-07	2.56268e-07	yes	NA	ko01100(Metabolic pathways);ko00970(Aminoacyl-tRNA biosynthesis);ko03015(mRNA surveillance pathway)
PC-3p-1060_9765	XM_016096293.2	943	968	954	-37	-24.6	0.664865	13	2-7,967-962;8-17,956-947;19-21,945-943	1-1,968-968[UP5];x-x,961-957[BULt];18-18,946-946[SIL]	(((.((((((((((.....((((((.&.))))))-----)))))))))).)))	UGGGUGUUCUUCCGCGGCAAAAUGGA&CCUAUUU-----CGGAAGAACAGCCA	1	26.8255	4	0.981549	Output/S24h/cleaveLand_result/t_plot/PC-3p-1060_9765_XM_016096293.2_954_TPlot.pdf	0	0	NA	NA	NA	26.8255	0	Inf	up	2.2264e-07	2.56268e-07	yes	GO:0031224(intrinsic component of membrane);GO:0016021(integral component of membrane);GO:0044425(membrane part);GO:0016020(membrane)	NA
PC-3p-1060_9765	XM_016101782.2	488	511	501	-37	-25.78	0.696757	7	1-9,511-503;10-13,501-498;16-21,493-488	x-x,502-502[BULt];14-15,497-494[AILt]	((((((....((((.(((((((((&)))))))))-))))--..))))))	UGGCUGGCGGCUUCUUGAAAUAGG&CCUAUUUCG-GAAG--AACAGCCA	5	134.127	3	0.0955491	Output/S24h/cleaveLand_result/t_plot/PC-3p-1060_9765_XM_016101782.2_501_TPlot.pdf	7	211.967	2	0.264505	Output/S0h/cleaveLand_result/t_plot/PC-3p-1060_9765_XM_016101782.2_501_TPlot.pdf	134.127	211.967	-0.660236	down	2.8582e-05	3.24354e-05	yes	NA	NA
PC-3p-1060_9765	XM_016102850.2	1199	1221	1212	-37	-24.9	0.672973	5.5	2-17,1220-1205;18-20,1202-1200	1-1,1221-1221[UP5];x-x,1204-1203[BULt];21-21,1199-1199[UP3]	.(((..((((((((((((((((.&.))))))))))))))))--))).	AGGCCCUGUUUUUCUGAAAUAGA&CCUAUUUCGGAAGAACA--GCCA	4	107.302	2	0.622673	Output/S24h/cleaveLand_result/t_plot/PC-3p-1060_9765_XM_016102850.2_1212_TPlot.pdf	1	30.281	4	0.916422	Output/S0h/cleaveLand_result/t_plot/PC-3p-1060_9765_XM_016102850.2_1212_TPlot.pdf	107.302	30.281	1.82519	up	5.1474e-11	2.04651e-10	yes	GO:0006807(nitrogen compound metabolic process);GO:0030554(adenyl nucleotide binding);GO:0008152(metabolic process);GO:0016773(phosphotransferase activity, alcohol group as acceptor);GO:0043167(ion binding);GO:0071704(organic substance metabolic process);GO:0032559(adenyl ribonucleotide binding);GO:1901564(organonitrogen compound metabolic process);GO:0044260(cellular macromolecule metabolic proc…	ko03008(Ribosome biogenesis in eukaryotes)
PC-3p-1060_9765	XM_016104164.2	627	648	638	-37	-24.2	0.654054	7	3-8,646-641;9-19,639-629	1-2,648-647[UP5];x-x,640-640[BULt];20-21,628-627[UP3]	..(((((((((((.((((((..&..))))))-)))))))))))..	UCGCUGUUCUUCCAGAAAUACU&CCUAUUUC-GGAAGAACAGCCA	1	26.8255	4	0.995845	Output/S24h/cleaveLand_result/t_plot/PC-3p-1060_9765_XM_016104164.2_638_TPlot.pdf	0	0	NA	NA	NA	26.8255	0	Inf	up	2.2264e-07	2.56268e-07	yes	NA	NA
PC-3p-1060_9765	XM_016109235.2	728	749	740	-37	-24.76	0.669189	11	1-2,749-748;7-11,743-739;12-21,737-728	3-6,747-744[SIL];x-x,738-738[BULt]	((((((((((.(((((....((&))....)))))-))))))))))	UGGCUGUUCUCUCCGGUUUCGG&CCUAUUUCGGA-AGAACAGCCA	2	53.6509	2	0.677836	Output/S24h/cleaveLand_result/t_plot/PC-3p-1060_9765_XM_016109235.2_740_TPlot.pdf	0	0	NA	NA	NA	53.6509	0	Inf	up	2.3929e-13	9.82167e-13	yes	GO:0031224(intrinsic component of membrane);GO:0016020(membrane);GO:0044425(membrane part);GO:0016021(integral component of membrane)	NA
PC-3p-1060_9765	XM_016109283.2	1202	1225	1215	-37	-25.1	0.678378	10	1-3,1225-1223;5-16,1220-1209;18-20,1205-1203	4-4,1222-1221[AILt];17-17,1208-1206[AILt];21-21,1202-1202[UP3]	.(((...((((((((((((..(((&)))-.))))))))))))--.))).	CGGCGACGUUCUUCCGGAGAGAGG&CCU-AUUUCGGAAGAAC--AGCCA	0	0	NA	NA	NA	1	30.281	4	0.836538	Output/S0h/cleaveLand_result/t_plot/PC-3p-1060_9765_XM_016109283.2_1215_TPlot.pdf	0	30.281	-Inf	down	3.7368e-08	6.97196e-08	yes	NA	ko03015(mRNA surveillance pathway)
PC-3p-1060_9765	XM_016109435.2	238	264	255	-37	-24.44	0.660541	20	1-3,264-262;5-10,260-255;13-21,246-238	4-4,261-261[SIL];11-12,254-247[AILt]	(((((((((........((((((.(((&))).))))))------..)))))))))	UGGCUGUUCAUGUCCCGCCGAAGGGGG&CCUAUUUCGG------AAGAACAGCCA	1	26.8255	4	0.985669	Output/S24h/cleaveLand_result/t_plot/PC-3p-1060_9765_XM_016109435.2_255_TPlot.pdf	0	0	NA	NA	NA	26.8255	0	Inf	up	2.2264e-07	2.56268e-07	yes	NA	NA
PC-3p-1060_9765	XM_021129416.1	1110	1129	1120	-37	-25.6	0.691892	6.5	1-3,1129-1127;5-14,1125-1116;16-20,1115-1111	4-4,1126-1126[SIL];15-15,x-x[BULq];21-21,1110-1110[UP3]	.(((((-((((((((((.(((&))).)))))))))).))))).	CGGCUG-UUUUCCGGAGGAGG&CCUAUUUCGGAAGAACAGCCA	0	0	NA	NA	NA	1	30.281	4	0.694281	Output/S0h/cleaveLand_result/t_plot/PC-3p-1060_9765_XM_021129416.1_1120_TPlot.pdf	0	30.281	-Inf	down	3.7368e-08	6.97196e-08	yes	GO:0080090(regulation of primary metabolic process);GO:0003700(DNA binding transcription factor activity);GO:0031323(regulation of cellular metabolic process);GO:0019222(regulation of metabolic process);GO:1901363(heterocyclic compound binding);GO:0010556(regulation of macromolecule biosynthetic process);GO:0003677(DNA binding);GO:0050789(regulation of biological process);GO:0006355(regulation of…	ko04626(Plant-pathogen interaction);ko04016(MAPK signaling pathway - plant)
PC-3p-1060_9765	XM_021139953.1	460	484	474	-37	-24.3	0.656757	7	1-2,484-483;3-15,481-469;16-16,467-467;17-20,464-461	x-x,482-482[BULt];x-x,468-468[BULt];x-x,466-465[BULt];21-21,460-460[UP3]	.((((..(.(((((((((((((.((&))-)))))))))))))-)--)))).	AGGCUCCGCUUCUUCCGAAAUGUGG&CC-UAUUUCGGAAGAA-C--AGCCA	1	26.8255	4	0.988869	Output/S24h/cleaveLand_result/t_plot/PC-3p-1060_9765_XM_021139953.1_474_TPlot.pdf	0	0	NA	NA	NA	26.8255	0	Inf	up	2.2264e-07	2.56268e-07	yes	NA	ko03050(Proteasome)
PC-3p-1060_9765	XM_021142435.1	239	265	256	-37	-24.44	0.660541	20	1-3,265-263;5-10,261-256;13-21,247-239	4-4,262-262[SIL];11-12,255-248[AILt]	(((((((((........((((((.(((&))).))))))------..)))))))))	UGGCUGUUCAUGUCCCGCCGAAGGGGG&CCUAUUUCGG------AAGAACAGCCA	1	26.8255	4	0.986027	Output/S24h/cleaveLand_result/t_plot/PC-3p-1060_9765_XM_021142435.1_256_TPlot.pdf	1	30.281	4	0.977151	Output/S0h/cleaveLand_result/t_plot/PC-3p-1060_9765_XM_021142435.1_256_TPlot.pdf	26.8255	30.281	-0.17481	down	0.64747	0.647871	yes	NA	NA
PC-3p-107728_73	XM_016082671.2	615	636	629	-47.1	-30.8	0.653928	12.5	4-7,633-630;10-23,629-616	1-3,636-634[UP5];8-9,x-x[BULq];24-24,615-615[UP3]	.((((((((((((((--((((...&...))))..)))))))))))))).	GUCGGGUGCAGCGGC--CGUGGUU&UCACAUGAAGUCGCUGCACCUGAG	2	53.6509	2	0.517506	Output/S24h/cleaveLand_result/t_plot/PC-3p-107728_73_XM_016082671.2_629_TPlot.pdf	0	0	NA	NA	NA	53.6509	0	Inf	up	2.3929e-13	9.82167e-13	yes	GO:0016829(lyase activity);GO:0016836(hydro-lyase activity);GO:0008152(metabolic process);GO:0016835(carbon-oxygen lyase activity);GO:0003824(catalytic activity)	ko01110(Biosynthesis of secondary metabolites);ko01210(2-Oxocarboxylic acid metabolism);ko01100(Metabolic pathways);ko01230(Biosynthesis of amino acids);ko00660(C5-Branched dibasic acid metabolism);ko00290(Valine, leucine and isoleucine biosynthesis)
PC-3p-107728_73	XM_021132348.1	622	643	636	-47.1	-30.8	0.653928	12.5	4-7,640-637;10-23,636-623	1-3,643-641[UP5];8-9,x-x[BULq];24-24,622-622[UP3]	.((((((((((((((--((((...&...))))..)))))))))))))).	GUCGGGUGCAGCGGC--CGUGGUU&UCACAUGAAGUCGCUGCACCUGAG	0	0	NA	NA	NA	1	30.281	4	0.840152	Output/S0h/cleaveLand_result/t_plot/PC-3p-107728_73_XM_021132348.1_636_TPlot.pdf	0	30.281	-Inf	down	3.7368e-08	6.97196e-08	yes	GO:0016829(lyase activity);GO:0016836(hydro-lyase activity);GO:0008152(metabolic process);GO:0016835(carbon-oxygen lyase activity);GO:0003824(catalytic activity)	ko01110(Biosynthesis of secondary metabolites);ko01210(2-Oxocarboxylic acid metabolism);ko01100(Metabolic pathways);ko01230(Biosynthesis of amino acids);ko00660(C5-Branched dibasic acid metabolism);ko00290(Valine, leucine and isoleucine biosynthesis)
PC-3p-107728_73	XM_021132349.1	622	643	636	-47.1	-30.8	0.653928	12.5	4-7,640-637;10-23,636-623	1-3,643-641[UP5];8-9,x-x[BULq];24-24,622-622[UP3]	.((((((((((((((--((((...&...))))..)))))))))))))).	GUCGGGUGCAGCGGC--CGUGGUU&UCACAUGAAGUCGCUGCACCUGAG	1	26.8255	4	0.891797	Output/S24h/cleaveLand_result/t_plot/PC-3p-107728_73_XM_021132349.1_636_TPlot.pdf	0	0	NA	NA	NA	26.8255	0	Inf	up	2.2264e-07	2.56268e-07	yes	GO:0016829(lyase activity);GO:0016836(hydro-lyase activity);GO:0008152(metabolic process);GO:0016835(carbon-oxygen lyase activity);GO:0003824(catalytic activity)	ko01110(Biosynthesis of secondary metabolites);ko01210(2-Oxocarboxylic acid metabolism);ko01100(Metabolic pathways);ko01230(Biosynthesis of amino acids);ko00660(C5-Branched dibasic acid metabolism);ko00290(Valine, leucine and isoleucine biosynthesis)
PC-3p-108384_72	XM_016082917.2	1369	1393	1384	-45.2	-31.6	0.699115	8	2-10,1392-1384;11-19,1382-1374;21-22,1372-1371	1-1,1393-1393[UP5];x-x,1383-1383[BULt];20-20,1373-1373[SIL];23-24,1370-1369[UP3]	..((.(((((((((.(((((((((.&.)))))))))-))))))))).))..	UUACACAGGUGCAGCUUGACCGUGC&ACAUGGUCGA-CUGCACCUGAGUUU	0	0	NA	NA	NA	1	30.281	4	0.521876	Output/S0h/cleaveLand_result/t_plot/PC-3p-108384_72_XM_016082917.2_1384_TPlot.pdf	0	30.281	-Inf	down	3.7368e-08	6.97196e-08	yes	GO:0008152(metabolic process);GO:0031966(mitochondrial membrane);GO:0044429(mitochondrial part);GO:0044260(cellular macromolecule metabolic process);GO:0044464(cell part);GO:0071704(organic substance metabolic process);GO:0015833(peptide transport);GO:0005488(binding);GO:0006627(protein processing involved in protein targeting to mitochondrion);GO:0007005(mitochondrion organization);GO:0046907(in…	NA
PC-3p-108384_72	XM_016107115.2	13567	13590	13581	-45.2	-32.1	0.710177	6	1-10,13590-13581;12-18,13579-13573;20-24,13571-13567	11-11,13580-13580[SIL];19-19,13572-13572[SIL]	(((((.(((((((.((((((((((&)))))))))).))))))).)))))	GGAUUGGGGUGCAUUUGACCAUGU&ACAUGGUCGACUGCACCUGAGUUU	0	0	NA	NA	NA	1	30.281	4	0.453228	Output/S0h/cleaveLand_result/t_plot/PC-3p-108384_72_XM_016107115.2_13581_TPlot.pdf	0	30.281	-Inf	down	3.7368e-08	6.97196e-08	yes	GO:0051234(establishment of localization);GO:0010101(post-embryonic root morphogenesis);GO:0048528(post-embryonic root development);GO:0050896(response to stimulus);GO:0009987(cellular process);GO:0005829(cytosol);GO:0009914(hormone transport);GO:0044424(intracellular part);GO:0051704(multi-organism process);GO:0016020(membrane);GO:0043169(cation binding);GO:0044444(cytoplasmic part);GO:0030054(c…	NA
PC-3p-108384_72	XM_021132348.1	618	641	633	-45.2	-33.7	0.745575	9	2-9,640-633;11-20,632-623;21-22,621-620	1-1,641-641[UP5];10-10,x-x[BULq];x-x,622-622[BULt];23-24,619-618[UP3]	..((.((((((((((-((((((((.&.)))))))).))))))))))-))..	GCGCGUCGGGUGCAG-CGGCCGUGG&ACAUGGUCGACUGCACCUGA-GUUU	1	26.8255	4	0.396733	Output/S24h/cleaveLand_result/t_plot/PC-3p-108384_72_XM_021132348.1_633_TPlot.pdf	0	0	NA	NA	NA	26.8255	0	Inf	up	2.2264e-07	2.56268e-07	yes	GO:0016829(lyase activity);GO:0016836(hydro-lyase activity);GO:0008152(metabolic process);GO:0016835(carbon-oxygen lyase activity);GO:0003824(catalytic activity)	ko01110(Biosynthesis of secondary metabolites);ko01210(2-Oxocarboxylic acid metabolism);ko01100(Metabolic pathways);ko01230(Biosynthesis of amino acids);ko00660(C5-Branched dibasic acid metabolism);ko00290(Valine, leucine and isoleucine biosynthesis)
PC-3p-110122_70	BGI_novel_T001367	1556	1582	1573	-32.1	-24.8	0.772586	13.5	2-10,1581-1573;11-22,1567-1556	1-1,1582-1582[UP5];x-x,1572-1568[BULt]	((((((((((((.....(((((((((.&.)))))))))-----))))))))))))	AGGCAAAGUUGAGGGCUCAAGGAUCCC&AGGAUUCUUG-----UUAACUUUGCUU	1	26.8255	4	0.671057	Output/S24h/cleaveLand_result/t_plot/PC-3p-110122_70_BGI_novel_T001367_1573_TPlot.pdf	0	0	NA	NA	NA	26.8255	0	Inf	up	2.2264e-07	2.56268e-07	yes	NA	ko03015(mRNA surveillance pathway)
PC-3p-110122_70	BGI_novel_T001630	6961	6984	6975	-32.1	-21.2	0.660436	9.5	1-12,6984-6973;13-15,6969-6967;18-22,6965-6961	x-x,6972-6970[BULt];16-17,6966-6966[AILq]	(((((.-(((...((((((((((((&))))))))))))---)))..)))))	AGGCAU-GUUUGGAACAAGGAUCCU&AGGAUUCUUGUU---AACUUUGCUU	1	26.8255	4	1	Output/S24h/cleaveLand_result/t_plot/PC-3p-110122_70_BGI_novel_T001630_6975_TPlot.pdf	0	0	NA	NA	NA	26.8255	0	Inf	up	2.2264e-07	2.56268e-07	yes	NA	ko04626(Plant-pathogen interaction)
PC-3p-110122_70	BGI_novel_T002762	1761	1783	1774	-32.1	-22.4	0.697819	7.5	2-15,1782-1769;17-20,1766-1763	1-1,1783-1783[UP5];16-16,1768-1767[AILt];21-22,1762-1761[UP3]	..((((..((((((((((((((.&.))))))))))))))-.))))..	CUGCAGCUGUUAACAGGAAUCUC&AGGAUUCUUGUUAAC-UUUGCUU	0	0	NA	NA	NA	1	30.281	4	0.99975	Output/S0h/cleaveLand_result/t_plot/PC-3p-110122_70_BGI_novel_T002762_1774_TPlot.pdf	0	30.281	-Inf	down	3.7368e-08	6.97196e-08	yes	GO:0097159(organic cyclic compound binding);GO:0003677(DNA binding);GO:0003676(nucleic acid binding);GO:0005488(binding);GO:1901363(heterocyclic compound binding)	NA
PC-3p-110122_70	BGI_novel_T002921	322	348	334	-32.1	-21.1	0.657321	16	1-5,348-344;6-8,342-340;9-20,335-324	x-x,343-343[BULt];x-x,339-336[BULt];21-22,323-322[UP3]	..((((((((((((....(((.(((((&)))))-)))----))))))))))))..	GCGCAAAGUUGGCGAAUGGGAGAUCCU&AGGAU-UCU----UGUUAACUUUGCUU	1	26.8255	4	1	Output/S24h/cleaveLand_result/t_plot/PC-3p-110122_70_BGI_novel_T002921_334_TPlot.pdf	0	0	NA	NA	NA	26.8255	0	Inf	up	2.2264e-07	2.56268e-07	yes	GO:0033554(cellular response to stress);GO:0003756(protein disulfide isomerase activity);GO:0005783(endoplasmic reticulum);GO:0050896(response to stimulus);GO:0005623(cell);GO:0009987(cellular process);GO:0044424(intracellular part);GO:0016853(isomerase activity);GO:0043227(membrane-bounded organelle);GO:0043226(organelle);GO:0003824(catalytic activity);GO:0044444(cytoplasmic part);GO:0016864(int…	ko04070(Phosphatidylinositol signaling system);ko01100(Metabolic pathways);ko00562(Inositol phosphate metabolism)
PC-3p-110122_70	BGI_novel_T003033	1596	1621	1612	-32.1	-21.16	0.65919	13.5	2-12,1620-1610;15-22,1603-1596	1-1,1621-1621[UP5];13-14,1609-1604[AILt]	((((((((......(((((((((((.&.)))))))))))----..))))))))	AAGCAGAGAGGGUGAGCAAGAAUUCA&AGGAUUCUUGUU----AACUUUGCUU	0	0	NA	NA	NA	1	30.281	4	1	Output/S0h/cleaveLand_result/t_plot/PC-3p-110122_70_BGI_novel_T003033_1612_TPlot.pdf	0	30.281	-Inf	down	3.7368e-08	6.97196e-08	yes	NA	ko03013(RNA transport)
PC-3p-110122_70	BGI_novel_T004296	851	872	864	-32.1	-21.4	0.666667	5.5	2-8,871-865;10-18,864-856;19-22,854-851	1-1,872-872[UP5];9-9,x-x[BULq];x-x,855-855[BULt]	((((.(((((((((-(((((((.&.))))))).)))))))))-))))	AAGCUGAAGUUAAC-AGAAUCUC&AGGAUUCUUGUUAACUUU-GCUU	0	0	NA	NA	NA	2	60.562	2	0.998043	Output/S0h/cleaveLand_result/t_plot/PC-3p-110122_70_BGI_novel_T004296_864_TPlot.pdf	0	60.562	-Inf	down	7.123e-15	4.42666e-14	yes	GO:0005515(protein binding);GO:0008092(cytoskeletal protein binding);GO:0071840(cellular component organization or biogenesis);GO:0009987(cellular process);GO:0015631(tubulin binding);GO:0008017(microtubule binding);GO:0005488(binding);GO:0016043(cellular component organization);GO:0007010(cytoskeleton organization);GO:0006996(organelle organization)	ko03013(RNA transport)
PC-3p-110122_70	BGI_novel_T005841	618	640	630	-32.1	-22.3	0.694704	9.5	2-2,639-639;5-22,635-618	1-1,640-640[UP5];3-4,638-636[AILt]	((((((((((((((((((...(.&.)-..))))))))))))))))))	GAGUGAAGUUGACAAGAAGCACA&AG-GAUUCUUGUUAACUUUGCUU	0	0	NA	NA	NA	1	30.281	4	0.999922	Output/S0h/cleaveLand_result/t_plot/PC-3p-110122_70_BGI_novel_T005841_630_TPlot.pdf	0	30.281	-Inf	down	3.7368e-08	6.97196e-08	yes	GO:0043933(macromolecular complex subunit organization);GO:0044464(cell part);GO:0006461(protein complex assembly);GO:0022607(cellular component assembly);GO:0009987(cellular process);GO:0005829(cytosol);GO:0071840(cellular component organization or biogenesis);GO:0044424(intracellular part);GO:0005622(intracellular);GO:0044085(cellular component biogenesis);GO:0034622(cellular macromolecular com…	NA
PC-3p-110122_70	BGI_novel_T006249	1130	1151	1142	-32.1	-22.1	0.688474	5	1-2,1151-1150;4-12,1148-1140;14-22,1138-1130	3-3,1149-1149[SIL];13-13,1139-1139[SIL]	(((((((((.(((((((((.((&)).))))))))).)))))))))	AAGUGAAGUGAACAAGAGUGCU&AGGAUUCUUGUUAACUUUGCUU	1	26.8255	4	0.999991	Output/S24h/cleaveLand_result/t_plot/PC-3p-110122_70_BGI_novel_T006249_1142_TPlot.pdf	0	0	NA	NA	NA	26.8255	0	Inf	up	2.2264e-07	2.56268e-07	yes	GO:0044424(intracellular part);GO:0000003(reproduction);GO:0035825(homologous recombination);GO:0006139(nucleobase-containing compound metabolic process);GO:0071704(organic substance metabolic process);GO:0051304(chromosome separation);GO:0033554(cellular response to stress);GO:0050896(response to stimulus);GO:0044464(cell part);GO:0097159(organic cyclic compound binding);GO:0006996(organelle org…	ko03420(Nucleotide excision repair)
PC-3p-110122_70	BGI_novel_T006292	2092	2114	2105	-32.1	-21.4	0.666667	7.5	2-9,2113-2106;11-18,2104-2097;19-20,2095-2094	1-1,2114-2114[UP5];10-10,2105-2105[SIL];x-x,2096-2096[BULt];21-22,2093-2092[UP3]	..((.((((((((.((((((((.&.)))))))).))))))))-))..	AUGUGAAAGUUGAGAAGAAUCCA&AGGAUUCUUGUUAACUUU-GCUU	1	26.8255	4	1	Output/S24h/cleaveLand_result/t_plot/PC-3p-110122_70_BGI_novel_T006292_2105_TPlot.pdf	0	0	NA	NA	NA	26.8255	0	Inf	up	2.2264e-07	2.56268e-07	yes	GO:0043226(organelle);GO:0044464(cell part);GO:0016853(isomerase activity);GO:0044260(cellular macromolecule metabolic process);GO:0008152(metabolic process);GO:0018193(peptidyl-amino acid modification);GO:0000209(protein polyubiquitination);GO:0016740(transferase activity);GO:0006807(nitrogen compound metabolic process);GO:0043170(macromolecule metabolic process);GO:0043412(macromolecule modific…	ko04120(Ubiquitin mediated proteolysis)
PC-3p-110122_70	BGI_novel_T006841	800	821	812	-32.1	-22.48	0.700312	9	2-15,820-807;19-21,803-801	1-1,821-821[UP5];16-18,806-804[SIL];22-22,800-800[UP3]	.(((...((((((((((((((.&.))))))))))))))...))).	UGGUUAUGUUGGCAAGAGUCCA&AGGAUUCUUGUUAACUUUGCUU	1	26.8255	4	0.999894	Output/S24h/cleaveLand_result/t_plot/PC-3p-110122_70_BGI_novel_T006841_812_TPlot.pdf	0	0	NA	NA	NA	26.8255	0	Inf	up	2.2264e-07	2.56268e-07	yes	GO:0016020(membrane);GO:0031224(intrinsic component of membrane);GO:0044425(membrane part);GO:0016021(integral component of membrane)	NA
PC-3p-110122_70	BGI_novel_T007586	375	399	390	-32.1	-21.28	0.662928	14.5	2-10,398-390;15-22,382-375	1-1,399-399[UP5];11-14,389-383[AILt]	((((((((.......(((((((((.&.)))))))))---....))))))))	AAGCGAAGGAGCCACCGAGAAUCCA&AGGAUUCUUG---UUAACUUUGCUU	3	80.4764	2	0.999711	Output/S24h/cleaveLand_result/t_plot/PC-3p-110122_70_BGI_novel_T007586_390_TPlot.pdf	0	0	NA	NA	NA	80.4764	0	Inf	up	2.9371e-19	3.092e-18	yes	GO:0016787(hydrolase activity);GO:0048856(anatomical structure development);GO:0006298(mismatch repair);GO:0043233(organelle lumen);GO:0000793(condensed chromosome);GO:0033554(cellular response to stress);GO:0006950(response to stress);GO:0048229(gametophyte development);GO:0043227(membrane-bounded organelle);GO:0006310(DNA recombination);GO:0016887(ATPase activity);GO:0016817(hydrolase activity,…	ko03430(Mismatch repair)
PC-3p-110122_70	BGI_novel_T010583	398	418	410	-32.1	-21.3	0.663551	9	2-3,417-416;5-11,415-409;13-21,407-399	1-1,418-418[UP5];4-4,x-x[BULq];12-12,408-408[SIL];22-22,398-398[UP3]	.(((((((((.(((((((-((.&.)).))))))).))))))))).	UGGCAAGGUUUACAAGGG-CCA&AGGAUUCUUGUUAACUUUGCUU	0	0	NA	NA	NA	1	30.281	4	1	Output/S0h/cleaveLand_result/t_plot/PC-3p-110122_70_BGI_novel_T010583_410_TPlot.pdf	0	30.281	-Inf	down	3.7368e-08	6.97196e-08	yes	GO:0006468(protein phosphorylation);GO:0032553(ribonucleotide binding);GO:0009987(cellular process);GO:0097159(organic cyclic compound binding);GO:0043167(ion binding);GO:0019538(protein metabolic process);GO:0018193(peptidyl-amino acid modification);GO:0043168(anion binding);GO:0000166(nucleotide binding);GO:0032555(purine ribonucleotide binding);GO:0016772(transferase activity, transferring pho…	NA
PC-3p-110122_70	BGI_novel_T010933	542	564	555	-32.1	-21.8	0.679128	7	2-3,563-562;5-13,560-552;14-20,550-544	1-1,564-564[UP5];4-4,561-561[SIL];x-x,551-551[BULt];21-22,543-542[UP3]	..(((((((.(((((((((.((.&.)).)))))))))-)))))))..	UCGCGAGGUAUAACAAGAAACCA&AGGAUUCUUGUUA-ACUUUGCUU	1	26.8255	4	1	Output/S24h/cleaveLand_result/t_plot/PC-3p-110122_70_BGI_novel_T010933_555_TPlot.pdf	0	0	NA	NA	NA	26.8255	0	Inf	up	2.2264e-07	2.56268e-07	yes	GO:0043231(intracellular membrane-bounded organelle);GO:0046983(protein dimerization activity);GO:0043227(membrane-bounded organelle);GO:0005623(cell);GO:0097159(organic cyclic compound binding);GO:0032993(protein-DNA complex);GO:0046982(protein heterodimerization activity);GO:0044446(intracellular organelle part);GO:0005634(nucleus);GO:0003676(nucleic acid binding);GO:0044422(organelle part);GO:…	NA
PC-3p-110122_70	BGI_novel_T012512	1587	1609	1600	-32.1	-23.2	0.722741	4.5	1-14,1609-1596;15-22,1594-1587	x-x,1595-1595[BULt]	((((((((.((((((((((((((&))))))))))))))-))))))))	AAGCAAGGAUUAACAAGGAUUUU&AGGAUUCUUGUUAA-CUUUGCUU	1	26.8255	4	0.992937	Output/S24h/cleaveLand_result/t_plot/PC-3p-110122_70_BGI_novel_T012512_1600_TPlot.pdf	1	30.281	4	0.987507	Output/S0h/cleaveLand_result/t_plot/PC-3p-110122_70_BGI_novel_T012512_1600_TPlot.pdf	26.8255	30.281	-0.17481	down	0.64747	0.647871	yes	GO:0006518(peptide metabolic process);GO:0016875(ligase activity, forming carbon-oxygen bonds);GO:0043043(peptide biosynthetic process);GO:0036094(small molecule binding);GO:0044249(cellular biosynthetic process);GO:0043168(anion binding);GO:0009058(biosynthetic process);GO:0043038(amino acid activation);GO:0044281(small molecule metabolic process);GO:1901576(organic substance biosynthetic proces…	ko00970(Aminoacyl-tRNA biosynthesis)
PC-3p-110122_70	BGI_novel_T012562	322	343	334	-32.1	-21.3	0.663551	10	1-3,343-341;6-7,338-337;9-12,335-332;15-22,329-322	4-5,340-339[SIL];8-8,336-336[SIL];13-14,331-330[SIL]	((((((((..((((.((..(((&)))..)).))))..))))))))	GAGCAGAGGGAACGCGAUGCCU&AGGAUUCUUGUUAACUUUGCUU	0	0	NA	NA	NA	1	30.281	4	1	Output/S0h/cleaveLand_result/t_plot/PC-3p-110122_70_BGI_novel_T012562_334_TPlot.pdf	0	30.281	-Inf	down	3.7368e-08	6.97196e-08	yes	GO:0000166(nucleotide binding);GO:0097159(organic cyclic compound binding);GO:0044464(cell part);GO:0044444(cytoplasmic part);GO:1901265(nucleoside phosphate binding);GO:0005488(binding);GO:0005737(cytoplasm);GO:0044424(intracellular part);GO:0003676(nucleic acid binding);GO:1901363(heterocyclic compound binding);GO:0005829(cytosol);GO:0036094(small molecule binding);GO:0005622(intracellular);GO:…	NA
PC-3p-110122_70	XM_016076141.2	786	808	798	-32.1	-21.7	0.676012	11.5	2-4,807-805;6-20,802-788	1-1,808-808[UP5];5-5,804-803[AILt];21-22,787-786[UP3]	..(((((((((((((((..(((.&.)))-.)))))))))))))))..	AUGCAGAGUUGACAGGGCUUUCG&AGGA-UUCUUGUUAACUUUGCUU	0	0	NA	NA	NA	1	30.281	4	0.999999	Output/S0h/cleaveLand_result/t_plot/PC-3p-110122_70_XM_016076141.2_798_TPlot.pdf	0	30.281	-Inf	down	3.7368e-08	6.97196e-08	yes	GO:0016787(hydrolase activity);GO:0003824(catalytic activity)	NA
PC-3p-110122_70	XM_016078215.2	1675	1702	1693	-32.1	-21.3	0.663551	9.5	2-12,1701-1691;14-16,1689-1687;17-22,1680-1675	1-1,1702-1702[UP5];13-13,1690-1690[SIL];x-x,1686-1681[BULt]	((((((......(((.(((((((((((.&.))))))))))).)))------))))))	AAGCAAGAAAACGGUAAACAAGGAUCCC&AGGAUUCUUGUUAACU------UUGCUU	0	0	NA	NA	NA	1	30.281	4	1	Output/S0h/cleaveLand_result/t_plot/PC-3p-110122_70_XM_016078215.2_1693_TPlot.pdf	0	30.281	-Inf	down	3.7368e-08	6.97196e-08	yes	GO:0043229(intracellular organelle);GO:0090304(nucleic acid metabolic process);GO:0034645(cellular macromolecule biosynthetic process);GO:0006259(DNA metabolic process);GO:0044249(cellular biosynthetic process);GO:0009059(macromolecule biosynthetic process);GO:0005623(cell);GO:0071704(organic substance metabolic process);GO:1901360(organic cyclic compound metabolic process);GO:0006139(nucleobase-…	ko03410(Base excision repair);ko00240(Pyrimidine metabolism);ko03030(DNA replication);ko03430(Mismatch repair);ko01100(Metabolic pathways);ko03440(Homologous recombination);ko03420(Nucleotide excision repair);ko00230(Purine metabolism)
PC-3p-110122_70	XM_016079227.2	1805	1825	1817	-32.1	-21.2	0.660436	10	2-3,1824-1823;5-9,1822-1818;11-22,1816-1805	1-1,1825-1825[UP5];4-4,x-x[BULq];10-10,1817-1817[SIL]	((((((((((((.(((((-((.&.)).))))).))))))))))))	AGGCAAGGUUGAGGAGAG-CUG&AGGAUUCUUGUUAACUUUGCUU	0	0	NA	NA	NA	1	30.281	4	1	Output/S0h/cleaveLand_result/t_plot/PC-3p-110122_70_XM_016079227.2_1817_TPlot.pdf	0	30.281	-Inf	down	3.7368e-08	6.97196e-08	yes	GO:0005623(cell);GO:0065007(biological regulation);GO:0050789(regulation of biological process);GO:0009987(cellular process);GO:0065008(regulation of biological quality);GO:0050794(regulation of cellular process);GO:0042592(homeostatic process);GO:0019725(cellular homeostasis);GO:0045454(cell redox homeostasis)	NA
PC-3p-110122_70	XM_016079967.2	1016	1037	1028	-32.1	-22.3	0.694704	9.5	3-9,1035-1029;11-21,1027-1017	1-2,1037-1036[UP5];10-10,1028-1028[SIL];22-22,1016-1016[UP3]	.(((((((((((.(((((((..&..))))))).))))))))))).	CAGUAGGGUUAGGGAGAAUCGC&AGGAUUCUUGUUAACUUUGCUU	1	26.8255	4	0.999961	Output/S24h/cleaveLand_result/t_plot/PC-3p-110122_70_XM_016079967.2_1028_TPlot.pdf	6	181.686	2	0.954383	Output/S0h/cleaveLand_result/t_plot/PC-3p-110122_70_XM_016079967.2_1028_TPlot.pdf	26.8255	181.686	-2.75977	down	7.7663e-27	2.16186e-25	yes	GO:0008270(zinc ion binding);GO:0019538(protein metabolic process);GO:0032446(protein modification by small protein conjugation);GO:0046872(metal ion binding);GO:0061659(ubiquitin-like protein ligase activity);GO:1901564(organonitrogen compound metabolic process);GO:0043632(modification-dependent macromolecule catabolic process);GO:0044257(cellular protein catabolic process);GO:0042787(protein ub…	NA
PC-3p-110122_70	XM_016080239.2	1999	2020	2011	-32.1	-21.6	0.672897	9.5	3-22,2018-1999	1-2,2020-2019[UP5]	((((((((((((((((((((..&..))))))))))))))))))))	AGGUGGGGUUAGCAAGGGUUGC&AGGAUUCUUGUUAACUUUGCUU	1	26.8255	4	1	Output/S24h/cleaveLand_result/t_plot/PC-3p-110122_70_XM_016080239.2_2011_TPlot.pdf	1	30.281	4	1	Output/S0h/cleaveLand_result/t_plot/PC-3p-110122_70_XM_016080239.2_2011_TPlot.pdf	26.8255	30.281	-0.17481	down	0.64747	0.647871	yes	GO:0044464(cell part);GO:0043227(membrane-bounded organelle);GO:0043229(intracellular organelle);GO:0044424(intracellular part);GO:0005545(1-phosphatidylinositol binding);GO:0005543(phospholipid binding);GO:0043168(anion binding);GO:0043623(cellular protein complex assembly);GO:0097708(intracellular vesicle);GO:0070271(protein complex biogenesis);GO:0016043(cellular component organization);GO:006…	NA
PC-3p-110122_70	XM_016080239.2	557	577	568	-32.1	-22.4	0.697819	8.5	1-12,577-566;15-20,564-559	13-14,565-565[AILq];21-22,558-557[UP3]	..((((((.-((((((((((((&))))))))))))..))))))..	ACGCAGAGG-GAUGAGGAUCCU&AGGAUUCUUGUUAACUUUGCUU	3	80.4764	2	0.962189	Output/S24h/cleaveLand_result/t_plot/PC-3p-110122_70_XM_016080239.2_568_TPlot.pdf	0	0	NA	NA	NA	80.4764	0	Inf	up	2.9371e-19	3.092e-18	yes	GO:0044464(cell part);GO:0043227(membrane-bounded organelle);GO:0043229(intracellular organelle);GO:0044424(intracellular part);GO:0005545(1-phosphatidylinositol binding);GO:0005543(phospholipid binding);GO:0043168(anion binding);GO:0043623(cellular protein complex assembly);GO:0097708(intracellular vesicle);GO:0070271(protein complex biogenesis);GO:0016043(cellular component organization);GO:006…	NA
PC-3p-110122_70	XM_016080430.2	1426	1446	1437	-32.1	-21.7	0.676012	10	2-11,1445-1436;15-21,1433-1427	1-1,1446-1446[UP5];12-14,1435-1434[AILq];22-22,1426-1426[UP3]	.(((((((..-((((((((((.&.))))))))))...))))))).	UGGCAGAGGU-GCAGGAAUUCA&AGGAUUCUUGUUAACUUUGCUU	1	26.8255	4	1	Output/S24h/cleaveLand_result/t_plot/PC-3p-110122_70_XM_016080430.2_1437_TPlot.pdf	0	0	NA	NA	NA	26.8255	0	Inf	up	2.2264e-07	2.56268e-07	yes	GO:0016835(carbon-oxygen lyase activity);GO:1902223(erythrose 4-phosphate/phosphoenolpyruvate family amino acid biosynthetic process);GO:0008652(cellular amino acid biosynthetic process);GO:0044464(cell part);GO:0043227(membrane-bounded organelle);GO:0004664(prephenate dehydratase activity);GO:0009532(plastid stroma);GO:1902221(erythrose 4-phosphate/phosphoenolpyruvate family amino acid metabolic…	ko00400(Phenylalanine, tyrosine and tryptophan biosynthesis);ko01100(Metabolic pathways);ko01230(Biosynthesis of amino acids);ko01110(Biosynthesis of secondary metabolites)
PC-3p-110122_70	XM_016081035.2	971	994	985	-32.1	-21.96	0.684112	13.5	2-11,993-984;15-21,978-972	1-1,994-994[UP5];12-14,983-979[AILt];22-22,971-971[UP3]	.(((((((.....((((((((((.&.))))))))))--...))))))).	CGGCGAGGGCUGUACAAGGGUCCG&AGGAUUCUUGU--UAACUUUGCUU	0	0	NA	NA	NA	1	30.281	4	0.99999	Output/S0h/cleaveLand_result/t_plot/PC-3p-110122_70_XM_016081035.2_985_TPlot.pdf	0	30.281	-Inf	down	3.7368e-08	6.97196e-08	yes	GO:0070482(response to oxygen levels);GO:0009061(anaerobic respiration);GO:0019538(protein metabolic process);GO:0055114(oxidation-reduction process);GO:0044260(cellular macromolecule metabolic process);GO:0018171(peptidyl-cysteine oxidation);GO:0042221(response to chemical);GO:0016702(oxidoreductase activity, acting on single donors with incorporation of molecular oxygen, incorporation of two at…	ko01100(Metabolic pathways);ko00430(Taurine and hypotaurine metabolism)
PC-3p-110122_70	XM_016082058.2	801	824	813	-32.1	-22	0.685358	11.5	1-9,824-816;10-11,813-812;13-20,810-803	x-x,815-814[BULt];12-12,811-811[SIL];21-22,802-801[UP3]	..((((((((.((..(((((((((&)))))))))--)).))))))))..	AUGCAAGGUUUGCCAGAGGAUCCU&AGGAUUCUU--GUUAACUUUGCUU	1	26.8255	4	0.999998	Output/S24h/cleaveLand_result/t_plot/PC-3p-110122_70_XM_016082058.2_813_TPlot.pdf	0	0	NA	NA	NA	26.8255	0	Inf	up	2.2264e-07	2.56268e-07	yes	GO:0043168(anion binding);GO:0044267(cellular protein metabolic process);GO:0016772(transferase activity, transferring phosphorus-containing groups);GO:0030554(adenyl nucleotide binding);GO:0006793(phosphorus metabolic process);GO:0006796(phosphate-containing compound metabolic process);GO:0016740(transferase activity);GO:0016310(phosphorylation);GO:1901265(nucleoside phosphate binding);GO:003621…	NA
PC-3p-110122_70	XM_016082314.2	2144	2163	2154	-32.1	-21.4	0.666667	7.5	2-16,2162-2148;19-21,2147-2145	1-1,2163-2163[UP5];17-18,x-x[BULq];22-22,2144-2144[UP3]	.(((--(((((((((((((((.&.)))))))))))))))..))).	UAGU--AGUUAACGGGGAUCCA&AGGAUUCUUGUUAACUUUGCUU	1	26.8255	4	1	Output/S24h/cleaveLand_result/t_plot/PC-3p-110122_70_XM_016082314.2_2154_TPlot.pdf	0	0	NA	NA	NA	26.8255	0	Inf	up	2.2264e-07	2.56268e-07	yes	NA	ko03013(RNA transport)
PC-3p-110122_70	XM_016082670.2	500	523	512	-32.1	-25.9	0.806854	6.5	1-3,523-521;4-21,518-501	x-x,520-519[BULt];22-22,500-500[UP3]	.((((((((((((((((((..(((&)))--)))))))))))))))))).	UGGCGAGGUUAACAAGAAUGACCU&AGG--AUUCUUGUUAACUUUGCUU	6	160.953	2	0.238296	Output/S24h/cleaveLand_result/t_plot/PC-3p-110122_70_XM_016082670.2_512_TPlot.pdf	9	272.529	2	0.211868	Output/S0h/cleaveLand_result/t_plot/PC-3p-110122_70_XM_016082670.2_512_TPlot.pdf	160.953	272.529	-0.759772	down	8.3401e-08	1.55471e-07	yes	GO:0003824(catalytic activity);GO:0015399(primary active transmembrane transporter activity);GO:0005773(vacuole);GO:0016817(hydrolase activity, acting on acid anhydrides);GO:0031090(organelle membrane);GO:0005623(cell);GO:0098805(whole membrane);GO:0043227(membrane-bounded organelle);GO:0016462(pyrophosphatase activity);GO:0005794(Golgi apparatus);GO:0016020(membrane);GO:0043492(ATPase activity, …	ko00190(Oxidative phosphorylation);ko04145(Phagosome);ko01100(Metabolic pathways)
PC-3p-110122_70	XM_016083881.2	2238	2258	2250	-32.1	-21.1	0.657321	9.5	2-6,2257-2253;10-22,2250-2238	1-1,2258-2258[UP5];7-9,2252-2251[AILq]	(((((((((((((..-(((((.&.)))))...)))))))))))))	AAGCGAAGUUGGCCA-AAUCCA&AGGAUUCUUGUUAACUUUGCUU	1	26.8255	4	1	Output/S24h/cleaveLand_result/t_plot/PC-3p-110122_70_XM_016083881.2_2250_TPlot.pdf	0	0	NA	NA	NA	26.8255	0	Inf	up	2.2264e-07	2.56268e-07	yes	NA	NA
PC-3p-110122_70	XM_016084212.2	751	771	763	-32.1	-21.2	0.660436	8	2-9,770-763;11-21,762-752	1-1,771-771[UP5];10-10,x-x[BULq];22-22,751-751[UP3]	.(((((((((((-((((((((.&.)))))))).))))))))))).	UGGCAAGGUUAG-AAGGAUCUC&AGGAUUCUUGUUAACUUUGCUU	1	26.8255	4	1	Output/S24h/cleaveLand_result/t_plot/PC-3p-110122_70_XM_016084212.2_763_TPlot.pdf	1	30.281	4	1	Output/S0h/cleaveLand_result/t_plot/PC-3p-110122_70_XM_016084212.2_763_TPlot.pdf	26.8255	30.281	-0.17481	down	0.64747	0.647871	yes	NA	NA
PC-3p-110122_70	XM_016084270.2	318	339	330	-32.1	-26.5	0.825545	6	2-4,338-336;7-22,333-318	1-1,339-339[UP5];5-6,335-334[SIL]	((((((((((((((((..(((.&.)))..))))))))))))))))	GAGCAAGGUUAACAAGCCUCCA&AGGAUUCUUGUUAACUUUGCUU	1	26.8255	4	0.426464	Output/S24h/cleaveLand_result/t_plot/PC-3p-110122_70_XM_016084270.2_330_TPlot.pdf	7	211.967	2	0.155463	Output/S0h/cleaveLand_result/t_plot/PC-3p-110122_70_XM_016084270.2_330_TPlot.pdf	26.8255	211.967	-2.98216	down	4.4298e-33	1.96226e-31	yes	GO:0003735(structural constituent of ribosome);GO:0043228(non-membrane-bounded organelle);GO:0071704(organic substance metabolic process);GO:0006518(peptide metabolic process);GO:0043232(intracellular non-membrane-bounded organelle);GO:0043043(peptide biosynthetic process);GO:0022625(cytosolic large ribosomal subunit);GO:0022626(cytosolic ribosome);GO:0044237(cellular metabolic process);GO:000519…	ko03010(Ribosome)
PC-3p-110122_70	XM_016085509.2	2474	2495	2485	-32.1	-20.9	0.65109	7.5	2-6,2494-2490;7-16,2488-2479;19-22,2477-2474	1-1,2495-2495[UP5];x-x,2489-2489[BULt];17-18,2478-2478[AILq]	((((.-((((((((((.(((((.&.)))))-))))))))))..))))	GAGCU-AGUUGACAAGAAAUCUA&AGGAUU-CUUGUUAACUUUGCUU	2	53.6509	1	0.434036	Output/S24h/cleaveLand_result/t_plot/PC-3p-110122_70_XM_016085509.2_2485_TPlot.pdf	0	0	NA	NA	NA	53.6509	0	Inf	up	2.3929e-13	9.82167e-13	yes	GO:0044257(cellular protein catabolic process);GO:0019538(protein metabolic process);GO:0044267(cellular protein metabolic process);GO:0043412(macromolecule modification);GO:0019783(ubiquitin-like protein-specific protease activity);GO:0101005(ubiquitinyl hydrolase activity);GO:0036211(protein modification process);GO:0006511(ubiquitin-dependent protein catabolic process);GO:0044237(cellular meta…	NA
PC-3p-110122_70	XM_016085670.2	391	413	404	-32.1	-21.8	0.679128	7	2-3,412-411;5-13,409-401;14-20,399-393	1-1,413-413[UP5];4-4,410-410[SIL];x-x,400-400[BULt];21-22,392-391[UP3]	..(((((((.(((((((((.((.&.)).)))))))))-)))))))..	UCGCGAGGUAUAACAAGAAACCA&AGGAUUCUUGUUA-ACUUUGCUU	2	53.6509	3	0.777179	Output/S24h/cleaveLand_result/t_plot/PC-3p-110122_70_XM_016085670.2_404_TPlot.pdf	1	30.281	4	0.999998	Output/S0h/cleaveLand_result/t_plot/PC-3p-110122_70_XM_016085670.2_404_TPlot.pdf	53.6509	30.281	0.82519	up	0.010743	0.0115483	yes	GO:0043227(membrane-bounded organelle);GO:0003676(nucleic acid binding);GO:0000786(nucleosome);GO:1901363(heterocyclic compound binding);GO:0044815(DNA packaging complex);GO:0046983(protein dimerization activity);GO:0097159(organic cyclic compound binding);GO:0043231(intracellular membrane-bounded organelle);GO:0044424(intracellular part);GO:0043228(non-membrane-bounded organelle);GO:0032991(macr…	NA
PC-3p-110122_70	XM_016086542.2	1576	1598	1589	-32.1	-23.2	0.722741	4.5	1-14,1598-1585;15-22,1583-1576	x-x,1584-1584[BULt]	((((((((.((((((((((((((&))))))))))))))-))))))))	AAGCAAGGAUUAACAAGGAUUUU&AGGAUUCUUGUUAA-CUUUGCUU	1	26.8255	4	0.995404	Output/S24h/cleaveLand_result/t_plot/PC-3p-110122_70_XM_016086542.2_1589_TPlot.pdf	0	0	NA	NA	NA	26.8255	0	Inf	up	2.2264e-07	2.56268e-07	yes	GO:0006518(peptide metabolic process);GO:0016875(ligase activity, forming carbon-oxygen bonds);GO:0043043(peptide biosynthetic process);GO:0036094(small molecule binding);GO:0044249(cellular biosynthetic process);GO:0043168(anion binding);GO:0009058(biosynthetic process);GO:0043038(amino acid activation);GO:0044281(small molecule metabolic process);GO:1901576(organic substance biosynthetic proces…	ko00970(Aminoacyl-tRNA biosynthesis)
PC-3p-110122_70	XM_016086701.2	669	691	681	-32.1	-23.8	0.741433	7	1-4,691-688;5-12,686-679;15-22,676-669	x-x,687-687[BULt];13-14,678-677[SIL]	((((((((..((((((((.((((&))))-))))))))..))))))))	GAGCGAAGAGAGCAAGAGCUCCU&AGGA-UUCUUGUUAACUUUGCUU	0	0	NA	NA	NA	1	30.281	4	0.880473	Output/S0h/cleaveLand_result/t_plot/PC-3p-110122_70_XM_016086701.2_681_TPlot.pdf	0	30.281	-Inf	down	3.7368e-08	6.97196e-08	yes	NA	ko04712(Circadian rhythm - plant)
PC-3p-110122_70	XM_016086828.2	251	270	262	-32.1	-22.5	0.700935	6	2-8,269-263;10-17,262-255;19-22,254-251	1-1,270-270[UP5];9-9,x-x[BULq];18-18,x-x[BULq]	((((-((((((((-(((((((.&.))))))).)))))))).))))	GAGC-GAGUUAAC-GGAAUCCG&AGGAUUCUUGUUAACUUUGCUU	1	26.8255	4	0.999828	Output/S24h/cleaveLand_result/t_plot/PC-3p-110122_70_XM_016086828.2_262_TPlot.pdf	3	90.843	2	0.928234	Output/S0h/cleaveLand_result/t_plot/PC-3p-110122_70_XM_016086828.2_262_TPlot.pdf	26.8255	90.843	-1.75977	down	3.5964e-09	1.3875e-08	yes	GO:0009813(flavonoid biosynthetic process);GO:0009058(biosynthetic process);GO:0009812(flavonoid metabolic process);GO:0016872(intramolecular lyase activity);GO:0003824(catalytic activity);GO:0045430(chalcone isomerase activity);GO:1901576(organic substance biosynthetic process);GO:0016853(isomerase activity);GO:0008152(metabolic process);GO:0071704(organic substance metabolic process)	ko01100(Metabolic pathways);ko01110(Biosynthesis of secondary metabolites);ko00941(Flavonoid biosynthesis)
PC-3p-110122_70	XM_016087637.2	2197	2221	2212	-32.1	-21.2	0.660436	10.5	2-17,2220-2205;18-21,2201-2198	1-1,2221-2221[UP5];x-x,2204-2202[BULt];22-22,2197-2197[UP3]	.((((...((((((((((((((((.&.))))))))))))))))---)))).	UAGUACUGGGGUUGGCAAGAGUCUC&AGGAUUCUUGUUAACUU---UGCUU	0	0	NA	NA	NA	2	60.562	1	0.33867	Output/S0h/cleaveLand_result/t_plot/PC-3p-110122_70_XM_016087637.2_2212_TPlot.pdf	0	60.562	-Inf	down	7.123e-15	4.42666e-14	yes	GO:2000112(regulation of cellular macromolecule biosynthetic process);GO:0044464(cell part);GO:0051246(regulation of protein metabolic process);GO:0044248(cellular catabolic process);GO:0043228(non-membrane-bounded organelle);GO:0005737(cytoplasm);GO:0019439(aromatic compound catabolic process);GO:0006139(nucleobase-containing compound metabolic process);GO:0043170(macromolecule metabolic process…	ko03018(RNA degradation)
PC-3p-110122_70	XM_016087838.2	1542	1565	1553	-32.1	-20.9	0.65109	9	1-5,1565-1561;6-18,1557-1545;20-22,1544-1542	x-x,1560-1558[BULt];19-19,x-x[BULq]	(((-(((((((((((((...(((((&)))))---))))))))))))).)))	GAG-AAGGUUAACAGGAAAUAUCCU&AGGAU---UCUUGUUAACUUUGCUU	3	80.4764	2	0.999985	Output/S24h/cleaveLand_result/t_plot/PC-3p-110122_70_XM_016087838.2_1553_TPlot.pdf	2	60.562	3	0.93743	Output/S0h/cleaveLand_result/t_plot/PC-3p-110122_70_XM_016087838.2_1553_TPlot.pdf	80.4764	60.562	0.410153	up	0.093557	0.0998676	yes	GO:0030880(RNA polymerase complex);GO:0005622(intracellular);GO:1901564(organonitrogen compound metabolic process);GO:0043234(protein complex);GO:0044451(nucleoplasm part);GO:2001141(regulation of RNA biosynthetic process);GO:0008152(metabolic process);GO:0009891(positive regulation of biosynthetic process);GO:0006357(regulation of transcription from RNA polymerase II promoter);GO:0008023(transcr…	NA
PC-3p-110122_70	XM_016089588.2	1502	1529	1520	-32.1	-23.5	0.732087	17.5	2-10,1528-1520;11-21,1513-1503	1-1,1529-1529[UP5];x-x,1519-1514[BULt];22-22,1502-1502[UP3]	.(((((((((((......(((((((((.&.)))))))))------))))))))))).	UGGCAAAGUUGAAACCUUCGGGAAUCCA&AGGAUUCUUG------UUAACUUUGCUU	1	26.8255	4	0.976244	Output/S24h/cleaveLand_result/t_plot/PC-3p-110122_70_XM_016089588.2_1520_TPlot.pdf	0	0	NA	NA	NA	26.8255	0	Inf	up	2.2264e-07	2.56268e-07	yes	GO:0016021(integral component of membrane);GO:0043231(intracellular membrane-bounded organelle);GO:0003677(DNA binding);GO:0043226(organelle);GO:0043229(intracellular organelle);GO:0005488(binding);GO:0097159(organic cyclic compound binding);GO:1901363(heterocyclic compound binding);GO:0003676(nucleic acid binding);GO:0044424(intracellular part);GO:0005623(cell);GO:0005634(nucleus);GO:0016020(mem…	ko04075(Plant hormone signal transduction)
PC-3p-110122_70	XM_016092255.2	673	694	685	-32.1	-22.9	0.713396	9.5	3-12,692-683;15-21,680-674	1-2,694-693[UP5];13-14,682-681[SIL];22-22,673-673[UP3]	.(((((((..((((((((((..&..))))))))))..))))))).	UGGCAAAGGAAGCAGGGAUCAU&AGGAUUCUUGUUAACUUUGCUU	0	0	NA	NA	NA	1	30.281	4	0.996585	Output/S0h/cleaveLand_result/t_plot/PC-3p-110122_70_XM_016092255.2_685_TPlot.pdf	0	30.281	-Inf	down	3.7368e-08	6.97196e-08	yes	GO:0055085(transmembrane transport);GO:0044425(membrane part);GO:0051179(localization);GO:0016021(integral component of membrane);GO:0006810(transport);GO:0051234(establishment of localization);GO:0031224(intrinsic component of membrane);GO:0016020(membrane)	NA
PC-3p-110122_70	XM_016093246.2	2796	2821	2808	-32.1	-21.1	0.657321	13.5	1-2,2821-2820;4-9,2818-2813;10-22,2808-2796	3-3,2819-2819[SIL];x-x,2812-2809[BULt]	(((((((((((((....((((((.((&)).))))))----)))))))))))))	AAGUAAAGUUGGCUACCGAGAAUGCU&AGGAUUCUU----GUUAACUUUGCUU	1	26.8255	4	1	Output/S24h/cleaveLand_result/t_plot/PC-3p-110122_70_XM_016093246.2_2808_TPlot.pdf	0	0	NA	NA	NA	26.8255	0	Inf	up	2.2264e-07	2.56268e-07	yes	NA	NA
PC-3p-110122_70	XM_016093976.2	444	465	457	-32.1	-22.5	0.700935	9	2-3,464-463;5-12,462-455;13-22,453-444	1-1,465-465[UP5];4-4,x-x[BULq];x-x,454-454[BULt]	((((((((((.((((((((-((.&.)).))))))))-))))))))))	GGGCAAAGUUGGGCAGGAA-CCA&AGGAUUCUUGUU-AACUUUGCUU	1	26.8255	4	0.999879	Output/S24h/cleaveLand_result/t_plot/PC-3p-110122_70_XM_016093976.2_457_TPlot.pdf	0	0	NA	NA	NA	26.8255	0	Inf	up	2.2264e-07	2.56268e-07	yes	GO:0032549(ribonucleoside binding);GO:0000166(nucleotide binding);GO:0043168(anion binding);GO:0097367(carbohydrate derivative binding);GO:0019001(guanyl nucleotide binding);GO:0036094(small molecule binding);GO:0032555(purine ribonucleotide binding);GO:0005488(binding);GO:0017076(purine nucleotide binding);GO:0001883(purine nucleoside binding);GO:0016787(hydrolase activity);GO:0032550(purine rib…	NA
PC-3p-110122_70	XM_016094798.2	321	342	333	-32.1	-21.6	0.672897	9	1-2,342-341;5-12,338-331;15-21,328-322	3-4,340-339[SIL];13-14,330-329[SIL];22-22,321-321[UP3]	.(((((((..((((((((..((&))..))))))))..))))))).	UGGCAGAGGUGACAAGAAAACU&AGGAUUCUUGUUAACUUUGCUU	0	0	NA	NA	NA	1	30.281	4	1	Output/S0h/cleaveLand_result/t_plot/PC-3p-110122_70_XM_016094798.2_333_TPlot.pdf	0	30.281	-Inf	down	3.7368e-08	6.97196e-08	yes	GO:0044237(cellular metabolic process);GO:0071840(cellular component organization or biogenesis);GO:1990904(ribonucleoprotein complex);GO:0043231(intracellular membrane-bounded organelle);GO:0044464(cell part);GO:0009941(chloroplast envelope);GO:0009507(chloroplast);GO:0044267(cellular protein metabolic process);GO:0044260(cellular macromolecule metabolic process);GO:0032991(macromolecular comple…	NA
PC-3p-110122_70	XM_016095903.2	675	698	687	-32.1	-21.2	0.660436	12.5	2-5,697-694;6-19,691-678	1-1,698-698[UP5];x-x,693-692[BULt];20-22,677-675[UP3]	...((((((((((((((..((((.&.))))--))))))))))))))...	CCUCAGAGUUGACGGGAAGGUCCG&AGGAU--UCUUGUUAACUUUGCUU	6	160.953	2	0.999814	Output/S24h/cleaveLand_result/t_plot/PC-3p-110122_70_XM_016095903.2_687_TPlot.pdf	0	0	NA	NA	NA	160.953	0	Inf	up	6.9605e-37	3.65983e-35	yes	GO:0031226(intrinsic component of plasma membrane);GO:0050789(regulation of biological process);GO:0005886(plasma membrane);GO:0007165(signal transduction);GO:0044464(cell part);GO:0006952(defense response);GO:0030054(cell junction);GO:0046658(anchored component of plasma membrane);GO:0050896(response to stimulus);GO:0005911(cell-cell junction);GO:0065007(biological regulation);GO:0016020(membran…	NA
PC-3p-110122_70	XM_016096010.2	891	913	904	-32.1	-21.2	0.660436	9	3-11,911-903;12-21,901-892	1-2,913-912[UP5];x-x,902-902[BULt];22-22,891-891[UP3]	.((((((((((.(((((((((..&..)))))))))-)))))))))).	CAGUGAAGUUGUACAAGGAUCAC&AGGAUUCUUGU-UAACUUUGCUU	1	26.8255	4	1	Output/S24h/cleaveLand_result/t_plot/PC-3p-110122_70_XM_016096010.2_904_TPlot.pdf	0	0	NA	NA	NA	26.8255	0	Inf	up	2.2264e-07	2.56268e-07	yes	GO:0044425(membrane part);GO:0016021(integral component of membrane);GO:0016020(membrane);GO:0031224(intrinsic component of membrane)	NA
PC-3p-110122_70	XM_016096287.2	357	378	369	-32.1	-21.6	0.672897	8	2-2,377-377;4-9,375-370;11-17,368-362;19-22,360-357	1-1,378-378[UP5];3-3,376-376[SIL];10-10,369-369[SIL];18-18,361-361[SIL]	((((.(((((((.((((((.(.&.).)))))).))))))).))))	GAGCUGAGUUGAGAAGAAUGCA&AGGAUUCUUGUUAACUUUGCUU	1	26.8255	4	1	Output/S24h/cleaveLand_result/t_plot/PC-3p-110122_70_XM_016096287.2_369_TPlot.pdf	0	0	NA	NA	NA	26.8255	0	Inf	up	2.2264e-07	2.56268e-07	yes	NA	NA
PC-3p-110122_70	XM_016096689.2	1089	1108	1101	-32.1	-22.4	0.697819	8	2-8,1107-1101;11-21,1100-1090	1-1,1108-1108[UP5];9-10,x-x[BULq];22-22,1089-1089[UP3]	.(((((((((((--(((((((.&.)))))))..))))))))))).	UGGCAAGGUUGA--AGAAUCCA&AGGAUUCUUGUUAACUUUGCUU	0	0	NA	NA	NA	2	60.562	2	0.949594	Output/S0h/cleaveLand_result/t_plot/PC-3p-110122_70_XM_016096689.2_1101_TPlot.pdf	0	60.562	-Inf	down	7.123e-15	4.42666e-14	yes	GO:1990837(sequence-specific double-stranded DNA binding);GO:0034654(nucleobase-containing compound biosynthetic process);GO:0003690(double-stranded DNA binding);GO:0097159(organic cyclic compound binding);GO:0003677(DNA binding);GO:0044464(cell part);GO:0006139(nucleobase-containing compound metabolic process);GO:0044271(cellular nitrogen compound biosynthetic process);GO:0032774(RNA biosyntheti…	ko04075(Plant hormone signal transduction);ko04712(Circadian rhythm - plant)
PC-3p-110122_70	XM_016097900.2	1247	1271	1262	-32.1	-22.4	0.697819	5.5	2-13,1270-1259;14-16,1257-1255;17-21,1252-1248	1-1,1271-1271[UP5];x-x,1258-1258[BULt];x-x,1254-1253[BULt];22-22,1247-1247[UP3]	.(((((..(((.((((((((((((.&.))))))))))))-)))--))))).	CAGCGAUCAGUGUAACAAGAAUCCC&AGGAUUCUUGUUA-ACU--UUGCUU	0	0	NA	NA	NA	1	30.281	4	0.999756	Output/S0h/cleaveLand_result/t_plot/PC-3p-110122_70_XM_016097900.2_1262_TPlot.pdf	0	30.281	-Inf	down	3.7368e-08	6.97196e-08	yes	NA	NA
PC-3p-110122_70	XM_016097901.2	1216	1240	1231	-32.1	-22.4	0.697819	5.5	2-13,1239-1228;14-16,1226-1224;17-21,1221-1217	1-1,1240-1240[UP5];x-x,1227-1227[BULt];x-x,1223-1222[BULt];22-22,1216-1216[UP3]	.(((((..(((.((((((((((((.&.))))))))))))-)))--))))).	CAGCGAUCAGUGUAACAAGAAUCCC&AGGAUUCUUGUUA-ACU--UUGCUU	1	26.8255	4	0.999949	Output/S24h/cleaveLand_result/t_plot/PC-3p-110122_70_XM_016097901.2_1231_TPlot.pdf	0	0	NA	NA	NA	26.8255	0	Inf	up	2.2264e-07	2.56268e-07	yes	NA	NA
PC-3p-110122_70	XM_016100648.2	1940	1962	1953	-32.1	-24.4	0.760125	7	1-2,1962-1961;4-15,1959-1948;16-22,1946-1940	3-3,1960-1960[SIL];x-x,1947-1947[BULt]	(((((((.((((((((((((.((&)).))))))))))))-)))))))	AAGCAGGUGUUGGCAAGAGUGCU&AGGAUUCUUGUUAAC-UUUGCUU	0	0	NA	NA	NA	2	60.562	2	0.369233	Output/S0h/cleaveLand_result/t_plot/PC-3p-110122_70_XM_016100648.2_1953_TPlot.pdf	0	60.562	-Inf	down	7.123e-15	4.42666e-14	yes	NA	NA
PC-3p-110122_70	XM_016100841.2	1889	1914	1901	-32.1	-21.4	0.666667	16.5	2-6,1913-1909;7-12,1904-1899;15-22,1896-1889	1-1,1914-1914[UP5];x-x,1908-1905[BULt];13-14,1898-1897[SIL]	((((((((..((((((....(((((.&.)))))----))))))..))))))))	GAGCAGGGGAGGCAGGCUAUGAUCCG&AGGAUU----CUUGUUAACUUUGCUU	0	0	NA	NA	NA	1	30.281	4	1	Output/S0h/cleaveLand_result/t_plot/PC-3p-110122_70_XM_016100841.2_1901_TPlot.pdf	0	30.281	-Inf	down	3.7368e-08	6.97196e-08	yes	GO:0043170(macromolecule metabolic process);GO:0071840(cellular component organization or biogenesis);GO:0070013(intracellular organelle lumen);GO:0036211(protein modification process);GO:0044446(intracellular organelle part);GO:1901564(organonitrogen compound metabolic process);GO:0019538(protein metabolic process);GO:0044237(cellular metabolic process);GO:0032991(macromolecular complex);GO:0005…	NA
PC-3p-110122_70	XM_016101943.2	325	345	337	-32.1	-22.1	0.688474	7	2-5,344-341;7-12,340-335;15-21,332-326	1-1,345-345[UP5];6-6,x-x[BULq];13-14,334-333[SIL];22-22,325-325[UP3]	.(((((((..((((((-((((.&.)))).))))))..))))))).	CGGCAAGGGCAACAAG-AUCCG&AGGAUUCUUGUUAACUUUGCUU	1	26.8255	4	0.999991	Output/S24h/cleaveLand_result/t_plot/PC-3p-110122_70_XM_016101943.2_337_TPlot.pdf	4	121.124	2	0.970781	Output/S0h/cleaveLand_result/t_plot/PC-3p-110122_70_XM_016101943.2_337_TPlot.pdf	26.8255	121.124	-2.17481	down	8.9815e-15	5.46095e-14	yes	GO:0016020(membrane);GO:0044425(membrane part);GO:0016021(integral component of membrane);GO:0031224(intrinsic component of membrane)	ko00190(Oxidative phosphorylation);ko01100(Metabolic pathways)
PC-3p-110122_70	XM_016103578.2	801	824	815	-32.1	-21.3	0.663551	9.5	2-10,823-815;12-13,813-812;14-22,809-801	1-1,824-824[UP5];11-11,814-814[SIL];x-x,811-810[BULt]	(((((((((..((.(((((((((.&.))))))))).))--)))))))))	GAGCAGGGUCUUGUUAAGGAUCCA&AGGAUUCUUGUUA--ACUUUGCUU	0	0	NA	NA	NA	1	30.281	4	1	Output/S0h/cleaveLand_result/t_plot/PC-3p-110122_70_XM_016103578.2_815_TPlot.pdf	0	30.281	-Inf	down	3.7368e-08	6.97196e-08	yes	GO:0006629(lipid metabolic process);GO:0008233(peptidase activity);GO:0016787(hydrolase activity);GO:1901575(organic substance catabolic process);GO:0030163(protein catabolic process);GO:0008152(metabolic process);GO:0004175(endopeptidase activity);GO:0043170(macromolecule metabolic process);GO:0003824(catalytic activity);GO:0019538(protein metabolic process);GO:0044238(primary metabolic process)…	NA
PC-3p-110122_70	XM_016104362.2	1197	1218	1209	-32.1	-21	0.654206	11	2-5,1217-1214;7-12,1212-1207;15-20,1204-1199	1-1,1218-1218[UP5];6-6,1213-1213[SIL];13-14,1206-1205[SIL];21-22,1198-1197[UP3]	..((((((..((((((.((((.&.)))).))))))..))))))..	UUGCAGGGGAAGCAGGUGUCCC&AGGAUUCUUGUUAACUUUGCUU	1	26.8255	4	1	Output/S24h/cleaveLand_result/t_plot/PC-3p-110122_70_XM_016104362.2_1209_TPlot.pdf	0	0	NA	NA	NA	26.8255	0	Inf	up	2.2264e-07	2.56268e-07	yes	GO:0032555(purine ribonucleotide binding);GO:0006807(nitrogen compound metabolic process);GO:1901265(nucleoside phosphate binding);GO:0036094(small molecule binding);GO:0046872(metal ion binding);GO:0046914(transition metal ion binding);GO:0016787(hydrolase activity);GO:0000166(nucleotide binding);GO:0008270(zinc ion binding);GO:0043168(anion binding);GO:0097367(carbohydrate derivative binding);G…	NA
PC-3p-110122_70	XM_016105930.2	1381	1402	1393	-32.1	-23.5	0.732087	9	2-2,1401-1401;5-21,1398-1382	1-1,1402-1402[UP5];3-4,1400-1399[SIL];22-22,1381-1381[UP3]	.(((((((((((((((((..(.&.)..))))))))))))))))).	UGGCAAGGUUAACAGGAGCACA&AGGAUUCUUGUUAACUUUGCUU	2	53.6509	2	0.743593	Output/S24h/cleaveLand_result/t_plot/PC-3p-110122_70_XM_016105930.2_1393_TPlot.pdf	4	121.124	2	0.695915	Output/S0h/cleaveLand_result/t_plot/PC-3p-110122_70_XM_016105930.2_1393_TPlot.pdf	53.6509	121.124	-1.17481	down	3.3256e-07	3.81975e-07	yes	GO:0016021(integral component of membrane);GO:0031224(intrinsic component of membrane);GO:0044425(membrane part);GO:0016020(membrane)	ko03013(RNA transport);ko03008(Ribosome biogenesis in eukaryotes)
PC-3p-110122_70	XM_016105931.2	1386	1407	1398	-32.1	-23.5	0.732087	9	2-2,1406-1406;5-21,1403-1387	1-1,1407-1407[UP5];3-4,1405-1404[SIL];22-22,1386-1386[UP3]	.(((((((((((((((((..(.&.)..))))))))))))))))).	UGGCAAGGUUAACAGGAGCACA&AGGAUUCUUGUUAACUUUGCUU	2	53.6509	2	0.710054	Output/S24h/cleaveLand_result/t_plot/PC-3p-110122_70_XM_016105931.2_1398_TPlot.pdf	1	30.281	4	0.957267	Output/S0h/cleaveLand_result/t_plot/PC-3p-110122_70_XM_016105931.2_1398_TPlot.pdf	53.6509	30.281	0.82519	up	0.010743	0.0115483	yes	GO:0016021(integral component of membrane);GO:0031224(intrinsic component of membrane);GO:0044425(membrane part);GO:0016020(membrane)	ko03013(RNA transport);ko03008(Ribosome biogenesis in eukaryotes)
PC-3p-110122_70	XM_016105946.2	632	654	644	-32.1	-22.4	0.697819	13.5	2-9,653-646;14-22,640-632	1-1,654-654[UP5];10-13,645-641[AILt]	(((((((((.....((((((((.&.))))))))-....)))))))))	GAGCGAGGUGUUAAGAGAGUCCG&AGGAUUCUU-GUUAACUUUGCUU	1	26.8255	4	0.999931	Output/S24h/cleaveLand_result/t_plot/PC-3p-110122_70_XM_016105946.2_644_TPlot.pdf	2	60.562	3	0.564102	Output/S0h/cleaveLand_result/t_plot/PC-3p-110122_70_XM_016105946.2_644_TPlot.pdf	26.8255	60.562	-1.17481	down	0.00030739	0.000341326	yes	GO:0043167(ion binding);GO:0071704(organic substance metabolic process);GO:0004619(phosphoglycerate mutase activity);GO:0044424(intracellular part);GO:0008152(metabolic process);GO:1901575(organic substance catabolic process);GO:0044282(small molecule catabolic process);GO:0016868(intramolecular transferase activity, phosphotransferases);GO:0046914(transition metal ion binding);GO:0009056(catabol…	ko01230(Biosynthesis of amino acids);ko01110(Biosynthesis of secondary metabolites);ko00260(Glycine, serine and threonine metabolism);ko01200(Carbon metabolism);ko00010(Glycolysis / Gluconeogenesis);ko01100(Metabolic pathways)
PC-3p-110122_70	XM_016105947.2	632	654	644	-32.1	-22.4	0.697819	13.5	2-9,653-646;14-22,640-632	1-1,654-654[UP5];10-13,645-641[AILt]	(((((((((.....((((((((.&.))))))))-....)))))))))	GAGCGAGGUGUUAAGAGAGUCCG&AGGAUUCUU-GUUAACUUUGCUU	0	0	NA	NA	NA	2	60.562	3	0.550525	Output/S0h/cleaveLand_result/t_plot/PC-3p-110122_70_XM_016105947.2_644_TPlot.pdf	0	60.562	-Inf	down	7.123e-15	4.42666e-14	yes	GO:0043167(ion binding);GO:0071704(organic substance metabolic process);GO:0004619(phosphoglycerate mutase activity);GO:0044424(intracellular part);GO:0008152(metabolic process);GO:1901575(organic substance catabolic process);GO:0044282(small molecule catabolic process);GO:0016868(intramolecular transferase activity, phosphotransferases);GO:0046914(transition metal ion binding);GO:0009056(catabol…	ko01230(Biosynthesis of amino acids);ko01110(Biosynthesis of secondary metabolites);ko00260(Glycine, serine and threonine metabolism);ko01200(Carbon metabolism);ko00010(Glycolysis / Gluconeogenesis);ko01100(Metabolic pathways)
PC-3p-110122_70	XM_016107246.2	648	670	661	-32.1	-22.32	0.695327	9	1-11,670-660;15-22,655-648	12-14,659-656[AILt]	((((((((....(((((((((((&)))))))))))-...))))))))	AGGUAGGGAGAUACAAGAGUCCU&AGGAUUCUUGU-UAACUUUGCUU	0	0	NA	NA	NA	1	30.281	4	0.999867	Output/S0h/cleaveLand_result/t_plot/PC-3p-110122_70_XM_016107246.2_661_TPlot.pdf	0	30.281	-Inf	down	3.7368e-08	6.97196e-08	yes	GO:1901566(organonitrogen compound biosynthetic process);GO:0016866(intramolecular transferase activity);GO:0044238(primary metabolic process);GO:1901564(organonitrogen compound metabolic process);GO:0006807(nitrogen compound metabolic process);GO:0046394(carboxylic acid biosynthetic process);GO:0043648(dicarboxylic acid metabolic process);GO:0009073(aromatic amino acid family biosynthetic proces…	ko01110(Biosynthesis of secondary metabolites);ko00400(Phenylalanine, tyrosine and tryptophan biosynthesis);ko01230(Biosynthesis of amino acids);ko01100(Metabolic pathways)
PC-3p-110122_70	XM_016109110.2	637	658	649	-32.1	-22.1	0.688474	9	2-8,657-651;10-22,649-637	1-1,658-658[UP5];9-9,650-650[SIL]	(((((((((((((.(((((((.&.))))))).)))))))))))))	AGGCAAGGUUGGCCAGAGUUUG&AGGAUUCUUGUUAACUUUGCUU	1	26.8255	4	0.999989	Output/S24h/cleaveLand_result/t_plot/PC-3p-110122_70_XM_016109110.2_649_TPlot.pdf	0	0	NA	NA	NA	26.8255	0	Inf	up	2.2264e-07	2.56268e-07	yes	GO:0044238(primary metabolic process);GO:0008171(O-methyltransferase activity);GO:0044237(cellular metabolic process);GO:0016740(transferase activity);GO:0008757(S-adenosylmethionine-dependent methyltransferase activity);GO:0006464(cellular protein modification process);GO:0016741(transferase activity, transferring one-carbon groups);GO:0010340(carboxyl-O-methyltransferase activity);GO:0008152(me…	NA
PC-3p-110122_70	XM_016110039.2	2559	2580	2571	-32.1	-21	0.654206	8.5	1-2,2580-2579;4-12,2577-2569;15-21,2566-2560	3-3,2578-2578[SIL];13-14,2568-2567[SIL];22-22,2559-2559[UP3]	.(((((((..(((((((((.((&)).)))))))))..))))))).	UGGUGAAGGAGGCAAGAAUGCU&AGGAUUCUUGUUAACUUUGCUU	2	53.6509	2	0.999948	Output/S24h/cleaveLand_result/t_plot/PC-3p-110122_70_XM_016110039.2_2571_TPlot.pdf	1	30.281	4	1	Output/S0h/cleaveLand_result/t_plot/PC-3p-110122_70_XM_016110039.2_2571_TPlot.pdf	53.6509	30.281	0.82519	up	0.010743	0.0115483	yes	GO:0005488(binding);GO:0046872(metal ion binding);GO:0010556(regulation of macromolecule biosynthetic process);GO:1903506(regulation of nucleic acid-templated transcription);GO:0060255(regulation of macromolecule metabolic process);GO:0031323(regulation of cellular metabolic process);GO:0019219(regulation of nucleobase-containing compound metabolic process);GO:0031326(regulation of cellular biosy…	NA
PC-3p-110122_70	XM_016110193.2	800	821	812	-32.1	-22.48	0.700312	9	2-15,820-807;19-21,803-801	1-1,821-821[UP5];16-18,806-804[SIL];22-22,800-800[UP3]	.(((...((((((((((((((.&.))))))))))))))...))).	UGGUUAUGUUGGCAAGAGUCCA&AGGAUUCUUGUUAACUUUGCUU	0	0	NA	NA	NA	1	30.281	4	0.999681	Output/S0h/cleaveLand_result/t_plot/PC-3p-110122_70_XM_016110193.2_812_TPlot.pdf	0	30.281	-Inf	down	3.7368e-08	6.97196e-08	yes	GO:0016020(membrane);GO:0031224(intrinsic component of membrane);GO:0044425(membrane part);GO:0016021(integral component of membrane)	NA
PC-3p-110122_70	XM_016110194.2	800	821	812	-32.1	-22.48	0.700312	9	2-15,820-807;19-21,803-801	1-1,821-821[UP5];16-18,806-804[SIL];22-22,800-800[UP3]	.(((...((((((((((((((.&.))))))))))))))...))).	UGGUUAUGUUGGCAAGAGUCCA&AGGAUUCUUGUUAACUUUGCUU	1	26.8255	4	0.999896	Output/S24h/cleaveLand_result/t_plot/PC-3p-110122_70_XM_016110194.2_812_TPlot.pdf	0	0	NA	NA	NA	26.8255	0	Inf	up	2.2264e-07	2.56268e-07	yes	GO:0016020(membrane);GO:0031224(intrinsic component of membrane);GO:0044425(membrane part);GO:0016021(integral component of membrane)	NA
PC-3p-110122_70	XM_016111434.2	778	806	797	-32.1	-22.8	0.71028	18	2-4,805-803;6-12,801-795;13-22,787-778	1-1,806-806[UP5];5-5,802-802[SIL];x-x,794-788[BULt]	((((((((((.......(((((((.(((.&.))).)))))))-------))))))))))	AAGCAAAGUUGGCUGAGGACAAGAUUCCA&AGGAUUCUUGUU-------AACUUUGCUU	1	26.8255	4	0.999111	Output/S24h/cleaveLand_result/t_plot/PC-3p-110122_70_XM_016111434.2_797_TPlot.pdf	1	30.281	4	0.998003	Output/S0h/cleaveLand_result/t_plot/PC-3p-110122_70_XM_016111434.2_797_TPlot.pdf	26.8255	30.281	-0.17481	down	0.64747	0.647871	yes	GO:0034641(cellular nitrogen compound metabolic process);GO:0097159(organic cyclic compound binding);GO:0043229(intracellular organelle);GO:0031428(box C/D snoRNP complex);GO:0044422(organelle part);GO:0044260(cellular macromolecule metabolic process);GO:0044452(nucleolar part);GO:0030515(snoRNA binding);GO:0005732(small nucleolar ribonucleoprotein complex);GO:0034660(ncRNA metabolic process);GO:…	ko03008(Ribosome biogenesis in eukaryotes)
PC-3p-110122_70	XM_016111589.2	857	878	870	-32.1	-21.2	0.660436	8.5	1-3,878-876;5-9,875-871;11-14,869-866;15-22,864-857	4-4,x-x[BULq];10-10,870-870[SIL];x-x,865-865[BULt]	((((((((.((((.(((((-(((&))).))))).))))-))))))))	GAGCAAAGUUUGAGGAGGA-CCU&AGGAUUCUUGUUAA-CUUUGCUU	2	53.6509	3	0.909529	Output/S24h/cleaveLand_result/t_plot/PC-3p-110122_70_XM_016111589.2_870_TPlot.pdf	0	0	NA	NA	NA	53.6509	0	Inf	up	2.3929e-13	9.82167e-13	yes	GO:1901265(nucleoside phosphate binding);GO:0008152(metabolic process);GO:0016491(oxidoreductase activity);GO:0036094(small molecule binding);GO:0005488(binding);GO:0003824(catalytic activity);GO:0097159(organic cyclic compound binding);GO:0048037(cofactor binding);GO:0055114(oxidation-reduction process);GO:0000166(nucleotide binding);GO:0016614(oxidoreductase activity, acting on CH-OH group of d…	ko01200(Carbon metabolism);ko00630(Glyoxylate and dicarboxylate metabolism);ko01100(Metabolic pathways)
PC-3p-110122_70	XM_016111590.2	955	976	968	-32.1	-21.2	0.660436	8.5	1-3,976-974;5-9,973-969;11-14,967-964;15-22,962-955	4-4,x-x[BULq];10-10,968-968[SIL];x-x,963-963[BULt]	((((((((.((((.(((((-(((&))).))))).))))-))))))))	GAGCAAAGUUUGAGGAGGA-CCU&AGGAUUCUUGUUAA-CUUUGCUU	3	80.4764	3	0.906527	Output/S24h/cleaveLand_result/t_plot/PC-3p-110122_70_XM_016111590.2_968_TPlot.pdf	0	0	NA	NA	NA	80.4764	0	Inf	up	2.9371e-19	3.092e-18	yes	GO:1901265(nucleoside phosphate binding);GO:0008152(metabolic process);GO:0016491(oxidoreductase activity);GO:0036094(small molecule binding);GO:0005488(binding);GO:0003824(catalytic activity);GO:0097159(organic cyclic compound binding);GO:0048037(cofactor binding);GO:0055114(oxidation-reduction process);GO:0000166(nucleotide binding);GO:0016614(oxidoreductase activity, acting on CH-OH group of d…	ko01200(Carbon metabolism);ko00630(Glyoxylate and dicarboxylate metabolism);ko01100(Metabolic pathways)
PC-3p-110122_70	XM_016112239.1	1752	1774	1764	-32.1	-22.5	0.700935	8	1-8,1774-1767;9-21,1765-1753	x-x,1766-1766[BULt];22-22,1752-1752[UP3]	.(((((((((((((.((((((((&))))))))-))))))))))))).	CAGUGAAGUUGACAGGGGAUCUU&AGGAUUCU-UGUUAACUUUGCUU	1	26.8255	4	0.999848	Output/S24h/cleaveLand_result/t_plot/PC-3p-110122_70_XM_016112239.1_1764_TPlot.pdf	0	0	NA	NA	NA	26.8255	0	Inf	up	2.2264e-07	2.56268e-07	yes	GO:0042651(thylakoid membrane);GO:0016020(membrane);GO:0042221(response to chemical);GO:0044436(thylakoid part);GO:0006950(response to stress);GO:0000304(response to singlet oxygen);GO:0005623(cell);GO:0009579(thylakoid);GO:1901700(response to oxygen-containing compound);GO:0044464(cell part);GO:0050896(response to stimulus);GO:0044424(intracellular part);GO:0000302(response to reactive oxygen sp…	ko03018(RNA degradation)
PC-3p-110122_70	XM_016112623.2	1903	1929	1917	-32.1	-21.1	0.657321	10	2-6,1928-1924;7-16,1920-1911;17-22,1908-1903	1-1,1929-1929[UP5];x-x,1923-1921[BULt];x-x,1910-1909[BULt]	((((((..((((((((((...(((((.&.)))))---))))))))))--))))))	AAGCAACCAGUUAACAGGUGAAAUCCC&AGGAUU---CUUGUUAACU--UUGCUU	0	0	NA	NA	NA	1	30.281	4	1	Output/S0h/cleaveLand_result/t_plot/PC-3p-110122_70_XM_016112623.2_1917_TPlot.pdf	0	30.281	-Inf	down	3.7368e-08	6.97196e-08	yes	GO:0016772(transferase activity, transferring phosphorus-containing groups);GO:0016310(phosphorylation);GO:0016021(integral component of membrane);GO:0044425(membrane part);GO:1901265(nucleoside phosphate binding);GO:0019538(protein metabolic process);GO:0003824(catalytic activity);GO:0032555(purine ribonucleotide binding);GO:0016773(phosphotransferase activity, alcohol group as acceptor);GO:1901…	NA
PC-3p-110122_70	XM_016113004.2	504	527	518	-32.1	-22.2	0.691589	6	1-9,527-519;11-14,517-514;15-19,512-508;20-22,506-504	10-10,518-518[SIL];x-x,513-513[BULt];x-x,507-507[BULt]	(((.(((((.((((.(((((((((&))))))))).))))-)))))-)))	GAGUCAGAGAUUAAGAAGGAUCCU&AGGAUUCUUGUUAA-CUUUG-CUU	3	80.4764	2	0.977078	Output/S24h/cleaveLand_result/t_plot/PC-3p-110122_70_XM_016113004.2_518_TPlot.pdf	1	30.281	4	0.999933	Output/S0h/cleaveLand_result/t_plot/PC-3p-110122_70_XM_016113004.2_518_TPlot.pdf	80.4764	30.281	1.41015	up	1.8451e-06	2.10209e-06	yes	GO:0005623(cell);GO:0044464(cell part);GO:0016020(membrane)	ko03060(Protein export)
PC-3p-110122_70	XM_016113208.2	307	328	319	-32.1	-26.4	0.82243	6	2-4,327-325;7-22,322-307	1-1,328-328[UP5];5-6,324-323[SIL]	((((((((((((((((..(((.&.)))..))))))))))))))))	GAGCAAGGUUAACAAGCCUCCG&AGGAUUCUUGUUAACUUUGCUU	4	107.302	2	0.182867	Output/S24h/cleaveLand_result/t_plot/PC-3p-110122_70_XM_016113208.2_319_TPlot.pdf	6	181.686	2	0.161924	Output/S0h/cleaveLand_result/t_plot/PC-3p-110122_70_XM_016113208.2_319_TPlot.pdf	107.302	181.686	-0.759772	down	1.2091e-05	1.37315e-05	yes	GO:0009058(biosynthetic process);GO:0009987(cellular process);GO:0006518(peptide metabolic process);GO:0043603(cellular amide metabolic process);GO:0010467(gene expression);GO:1901564(organonitrogen compound metabolic process);GO:0043228(non-membrane-bounded organelle);GO:0030529(intracellular ribonucleoprotein complex);GO:0044237(cellular metabolic process);GO:0032991(macromolecular complex);GO:…	ko03010(Ribosome)
PC-3p-110122_70	XM_016113373.2	2364	2395	2376	-32.1	-22.7	0.707165	25	1-8,2395-2388;9-22,2377-2364	x-x,2387-2378[BULt]	((((((((((((((..........((((((((&))))))))----------))))))))))))))	AAGUAAGGUUGGCAAACUUGGGAAGGAGUCCU&AGGAUUCU----------UGUUAACUUUGCUU	0	0	NA	NA	NA	1	30.281	4	0.998779	Output/S0h/cleaveLand_result/t_plot/PC-3p-110122_70_XM_016113373.2_2376_TPlot.pdf	0	30.281	-Inf	down	3.7368e-08	6.97196e-08	yes	GO:0044464(cell part);GO:0006810(transport);GO:0022857(transmembrane transporter activity);GO:0051179(localization);GO:0015103(inorganic anion transmembrane transporter activity);GO:0055085(transmembrane transport);GO:0055080(cation homeostasis);GO:0016020(membrane);GO:0005887(integral component of plasma membrane);GO:0042592(homeostatic process);GO:0031226(intrinsic component of plasma membrane)…	NA
PC-3p-110122_70	XM_016113492.2	1079	1101	1092	-32.1	-22.4	0.697819	8	1-11,1101-1091;12-15,1088-1085;18-22,1083-1079	x-x,1090-1089[BULt];16-17,1084-1084[AILq]	(((((.-((((..(((((((((((&)))))))))))--))))..)))))	AAGCAU-GUUGGAGCAAGAAUCCU&AGGAUUCUUGU--UAACUUUGCUU	0	0	NA	NA	NA	2	60.562	2	0.946809	Output/S0h/cleaveLand_result/t_plot/PC-3p-110122_70_XM_016113492.2_1092_TPlot.pdf	0	60.562	-Inf	down	7.123e-15	4.42666e-14	yes	GO:1901575(organic substance catabolic process);GO:0004553(hydrolase activity, hydrolyzing O-glycosyl compounds);GO:0008810(cellulase activity);GO:0005975(carbohydrate metabolic process);GO:0000272(polysaccharide catabolic process);GO:0009057(macromolecule catabolic process);GO:0009251(glucan catabolic process);GO:0044248(cellular catabolic process);GO:0009987(cellular process);GO:0044247(cellula…	ko01100(Metabolic pathways);ko00500(Starch and sucrose metabolism)
PC-3p-110122_70	XM_016113979.2	1138	1160	1150	-32.1	-26	0.809969	6	2-9,1159-1152;10-21,1150-1139	1-1,1160-1160[UP5];x-x,1151-1151[BULt];22-22,1138-1138[UP3]	.((((((((((((.((((((((.&.))))))))-)))))))))))).	UGGCAGAGUUAAUGAAGAAUCCA&AGGAUUCUU-GUUAACUUUGCUU	0	0	NA	NA	NA	1	30.281	4	0.488703	Output/S0h/cleaveLand_result/t_plot/PC-3p-110122_70_XM_016113979.2_1150_TPlot.pdf	0	30.281	-Inf	down	3.7368e-08	6.97196e-08	yes	GO:0055114(oxidation-reduction process);GO:0016020(membrane);GO:0044550(secondary metabolite biosynthetic process);GO:1901363(heterocyclic compound binding);GO:0046906(tetrapyrrole binding);GO:0016709(oxidoreductase activity, acting on paired donors, with incorporation or reduction of molecular oxygen, NAD(P)H as one donor, and incorporation of one atom of oxygen);GO:0046872(metal ion binding);GO…	ko01100(Metabolic pathways);ko00943(Isoflavonoid biosynthesis)
PC-3p-110122_70	XM_016115839.2	883	903	894	-32.1	-21.7	0.676012	9	2-9,902-895;11-12,893-892;15-22,890-883	1-1,903-903[UP5];10-10,894-894[SIL];13-14,891-891[AILq]	((((((((.-((.((((((((.&.)))))))).))..))))))))	AGGCGAAGG-AAGGGGAGUCCG&AGGAUUCUUGUUAACUUUGCUU	3	80.4764	2	0.996736	Output/S24h/cleaveLand_result/t_plot/PC-3p-110122_70_XM_016115839.2_894_TPlot.pdf	0	0	NA	NA	NA	80.4764	0	Inf	up	2.9371e-19	3.092e-18	yes	NA	NA
PC-3p-110122_70	XM_016116247.2	616	638	629	-32.1	-21.4	0.666667	10	4-16,635-623;17-22,621-616	1-3,638-636[UP5];x-x,622-622[BULt]	((((((.(((((((((((((...&...)))))))))))))-))))))	AGGCAGAAGUUGACGAGGAUAAA&AGGAUUCUUGUUAACU-UUGCUU	0	0	NA	NA	NA	2	60.562	3	0.837365	Output/S0h/cleaveLand_result/t_plot/PC-3p-110122_70_XM_016116247.2_629_TPlot.pdf	0	60.562	-Inf	down	7.123e-15	4.42666e-14	yes	NA	NA
PC-3p-110122_70	XM_016116924.2	2501	2522	2512	-32.1	-21.5	0.669782	7.5	1-6,2522-2517;7-13,2515-2509;15-22,2508-2501	x-x,2516-2516[BULt];14-14,x-x[BULq]	((((((((-(((((((.((((((&))))))-))))))).))))))))	GGGCAGAG-UAAUGAGAAGUCCU&AGGAUU-CUUGUUAACUUUGCUU	1	26.8255	4	1	Output/S24h/cleaveLand_result/t_plot/PC-3p-110122_70_XM_016116924.2_2512_TPlot.pdf	0	0	NA	NA	NA	26.8255	0	Inf	up	2.2264e-07	2.56268e-07	yes	NA	NA
PC-3p-110122_70	XM_016117788.2	452	474	465	-32.1	-23.9	0.744548	9	2-4,473-471;6-19,469-456;20-22,454-452	1-1,474-474[UP5];5-5,470-470[SIL];x-x,455-455[BULt]	(((.((((((((((((((.(((.&.))).))))))))))))))-)))	GAGACAGAGUUGGCGAGGCUCCA&AGGAUUCUUGUUAACUUUG-CUU	3	80.4764	2	0.558065	Output/S24h/cleaveLand_result/t_plot/PC-3p-110122_70_XM_016117788.2_465_TPlot.pdf	3	90.843	2	0.51045	Output/S0h/cleaveLand_result/t_plot/PC-3p-110122_70_XM_016117788.2_465_TPlot.pdf	80.4764	90.843	-0.17481	down	0.42833	0.452615	yes	GO:0016020(membrane)	NA
PC-3p-110122_70	XM_016117789.2	491	513	504	-32.1	-23.9	0.744548	9	2-4,512-510;6-19,508-495;20-22,493-491	1-1,513-513[UP5];5-5,509-509[SIL];x-x,494-494[BULt]	(((.((((((((((((((.(((.&.))).))))))))))))))-)))	GAGACAGAGUUGGCGAGGCUCCA&AGGAUUCUUGUUAACUUUG-CUU	0	0	NA	NA	NA	4	121.124	2	0.502872	Output/S0h/cleaveLand_result/t_plot/PC-3p-110122_70_XM_016117789.2_504_TPlot.pdf	0	121.124	-Inf	down	3.5765e-28	1.04348e-26	yes	GO:0016020(membrane)	NA
PC-3p-110122_70	XM_021128237.1	1692	1719	1710	-32.1	-21.3	0.663551	9.5	2-12,1718-1708;14-16,1706-1704;17-22,1697-1692	1-1,1719-1719[UP5];13-13,1707-1707[SIL];x-x,1703-1698[BULt]	((((((......(((.(((((((((((.&.))))))))))).)))------))))))	AAGCAAGAAAACGGUAAACAAGGAUCCC&AGGAUUCUUGUUAACU------UUGCUU	0	0	NA	NA	NA	1	30.281	4	1	Output/S0h/cleaveLand_result/t_plot/PC-3p-110122_70_XM_021128237.1_1710_TPlot.pdf	0	30.281	-Inf	down	3.7368e-08	6.97196e-08	yes	GO:0043229(intracellular organelle);GO:0090304(nucleic acid metabolic process);GO:0034645(cellular macromolecule biosynthetic process);GO:0006259(DNA metabolic process);GO:0044249(cellular biosynthetic process);GO:0009059(macromolecule biosynthetic process);GO:0005623(cell);GO:0071704(organic substance metabolic process);GO:1901360(organic cyclic compound metabolic process);GO:0006139(nucleobase-…	ko03410(Base excision repair);ko00240(Pyrimidine metabolism);ko03030(DNA replication);ko03430(Mismatch repair);ko01100(Metabolic pathways);ko03440(Homologous recombination);ko03420(Nucleotide excision repair);ko00230(Purine metabolism)
PC-3p-110122_70	XM_021128836.1	2117	2141	2132	-32.1	-21.2	0.660436	10.5	2-17,2140-2125;18-21,2121-2118	1-1,2141-2141[UP5];x-x,2124-2122[BULt];22-22,2117-2117[UP3]	.((((...((((((((((((((((.&.))))))))))))))))---)))).	UAGUACUGGGGUUGGCAAGAGUCUC&AGGAUUCUUGUUAACUU---UGCUU	0	0	NA	NA	NA	1	30.281	4	1	Output/S0h/cleaveLand_result/t_plot/PC-3p-110122_70_XM_021128836.1_2132_TPlot.pdf	0	30.281	-Inf	down	3.7368e-08	6.97196e-08	yes	GO:2000112(regulation of cellular macromolecule biosynthetic process);GO:0044464(cell part);GO:0051246(regulation of protein metabolic process);GO:0044248(cellular catabolic process);GO:0043228(non-membrane-bounded organelle);GO:0005737(cytoplasm);GO:0019439(aromatic compound catabolic process);GO:0006139(nucleobase-containing compound metabolic process);GO:0043170(macromolecule metabolic process…	ko03018(RNA degradation)
PC-3p-110122_70	XM_021129987.1	798	820	811	-32.1	-21	0.654206	7	2-7,819-814;9-12,812-809;15-15,806-806;16-22,804-798	1-1,820-820[UP5];8-8,813-813[SIL];13-14,808-807[SIL];x-x,805-805[BULt]	(((((((.(..((((.((((((.&.)))))).))))..)-)))))))	AAGCAAAUGGUGACAUGAAUCCA&AGGAUUCUUGUUAAC-UUUGCUU	0	0	NA	NA	NA	1	30.281	4	1	Output/S0h/cleaveLand_result/t_plot/PC-3p-110122_70_XM_021129987.1_811_TPlot.pdf	0	30.281	-Inf	down	3.7368e-08	6.97196e-08	yes	NA	NA
PC-3p-110122_70	XM_021129999.1	2152	2171	2162	-32.1	-21.4	0.666667	7.5	2-16,2170-2156;19-21,2155-2153	1-1,2171-2171[UP5];17-18,x-x[BULq];22-22,2152-2152[UP3]	.(((--(((((((((((((((.&.)))))))))))))))..))).	UAGU--AGUUAACGGGGAUCCA&AGGAUUCUUGUUAACUUUGCUU	1	26.8255	4	1	Output/S24h/cleaveLand_result/t_plot/PC-3p-110122_70_XM_021129999.1_2162_TPlot.pdf	0	0	NA	NA	NA	26.8255	0	Inf	up	2.2264e-07	2.56268e-07	yes	NA	ko03013(RNA transport)
PC-3p-110122_70	XM_021131353.1	1241	1263	1254	-32.1	-23.2	0.722741	4.5	1-14,1263-1250;15-22,1248-1241	x-x,1249-1249[BULt]	((((((((.((((((((((((((&))))))))))))))-))))))))	AAGCAAGGAUUAACAAGGAUUUU&AGGAUUCUUGUUAA-CUUUGCUU	0	0	NA	NA	NA	2	60.562	2	0.788053	Output/S0h/cleaveLand_result/t_plot/PC-3p-110122_70_XM_021131353.1_1254_TPlot.pdf	0	60.562	-Inf	down	7.123e-15	4.42666e-14	yes	GO:0006518(peptide metabolic process);GO:0016875(ligase activity, forming carbon-oxygen bonds);GO:0043043(peptide biosynthetic process);GO:0036094(small molecule binding);GO:0044249(cellular biosynthetic process);GO:0043168(anion binding);GO:0009058(biosynthetic process);GO:0043038(amino acid activation);GO:0044281(small molecule metabolic process);GO:1901576(organic substance biosynthetic proces…	ko00970(Aminoacyl-tRNA biosynthesis)
PC-3p-110122_70	XM_021131738.1	751	771	763	-32.1	-21.2	0.660436	8	2-9,770-763;11-21,762-752	1-1,771-771[UP5];10-10,x-x[BULq];22-22,751-751[UP3]	.(((((((((((-((((((((.&.)))))))).))))))))))).	UGGCAAGGUUAG-AAGGAUCUC&AGGAUUCUUGUUAACUUUGCUU	1	26.8255	4	1	Output/S24h/cleaveLand_result/t_plot/PC-3p-110122_70_XM_021131738.1_763_TPlot.pdf	0	0	NA	NA	NA	26.8255	0	Inf	up	2.2264e-07	2.56268e-07	yes	NA	NA
PC-3p-110122_70	XM_021131963.1	2152	2174	2164	-32.1	-22.7	0.707165	8.5	2-3,2173-2172;4-19,2170-2155	1-1,2174-2174[UP5];x-x,2171-2171[BULt];20-22,2154-2152[UP3]	...((((((((((((((((.((.&.))-))))))))))))))))...	UACCAGAGUUGGCAAGAAUGCCA&AGG-AUUCUUGUUAACUUUGCUU	0	0	NA	NA	NA	2	60.562	2	0.897823	Output/S0h/cleaveLand_result/t_plot/PC-3p-110122_70_XM_021131963.1_2164_TPlot.pdf	0	60.562	-Inf	down	7.123e-15	4.42666e-14	yes	GO:0030522(intracellular receptor signaling pathway);GO:0060089(molecular transducer activity);GO:0065007(biological regulation);GO:0004872(receptor activity);GO:0003904(deoxyribodipyrimidine photo-lyase activity);GO:0071483(cellular response to blue light);GO:0071214(cellular response to abiotic stimulus);GO:0016830(carbon-carbon lyase activity);GO:0004871(signal transducer activity);GO:0009314(…	ko04712(Circadian rhythm - plant)
PC-3p-110122_70	XM_021133746.1	549	568	559	-32.1	-21.7	0.676012	6.5	2-12,567-557;15-22,556-549	1-1,568-568[UP5];13-14,x-x[BULq]	((((((((--(((((((((((.&.)))))))))))..))))))))	AAGCAAGG--GGCAAGAAUUCA&AGGAUUCUUGUUAACUUUGCUU	1	26.8255	4	1	Output/S24h/cleaveLand_result/t_plot/PC-3p-110122_70_XM_021133746.1_559_TPlot.pdf	0	0	NA	NA	NA	26.8255	0	Inf	up	2.2264e-07	2.56268e-07	yes	GO:0006399(tRNA metabolic process);GO:0019239(deaminase activity);GO:0043229(intracellular organelle);GO:0034470(ncRNA processing);GO:0044464(cell part);GO:0006725(cellular aromatic compound metabolic process);GO:0006807(nitrogen compound metabolic process);GO:0008033(tRNA processing);GO:0009451(RNA modification);GO:0006400(tRNA modification);GO:0044238(primary metabolic process);GO:0043231(intra…	NA
PC-3p-110122_70	XM_021134920.1	564	587	578	-32.1	-21.2	0.660436	9.5	1-12,587-576;13-15,572-570;18-22,568-564	x-x,575-573[BULt];16-17,569-569[AILq]	(((((.-(((...((((((((((((&))))))))))))---)))..)))))	AGGCAU-GUUUGGAACAAGGAUCCU&AGGAUUCUUGUU---AACUUUGCUU	1	26.8255	4	1	Output/S24h/cleaveLand_result/t_plot/PC-3p-110122_70_XM_021134920.1_578_TPlot.pdf	0	0	NA	NA	NA	26.8255	0	Inf	up	2.2264e-07	2.56268e-07	yes	NA	ko04626(Plant-pathogen interaction)
PC-3p-110122_70	XM_021139784.1	667	690	679	-32.1	-26	0.809969	6.5	1-3,690-688;4-21,685-668	x-x,687-686[BULt];22-22,667-667[UP3]	.((((((((((((((((((..(((&)))--)))))))))))))))))).	CGGCGAGGUUAACAAGAAUGACCU&AGG--AUUCUUGUUAACUUUGCUU	1	26.8255	4	0.51945	Output/S24h/cleaveLand_result/t_plot/PC-3p-110122_70_XM_021139784.1_679_TPlot.pdf	0	0	NA	NA	NA	26.8255	0	Inf	up	2.2264e-07	2.56268e-07	yes	GO:0043492(ATPase activity, coupled to movement of substances);GO:0043229(intracellular organelle);GO:0051234(establishment of localization);GO:0017111(nucleoside-triphosphatase activity);GO:0042623(ATPase activity, coupled);GO:0043231(intracellular membrane-bounded organelle);GO:0044422(organelle part);GO:0098805(whole membrane);GO:0044437(vacuolar part);GO:0044464(cell part);GO:0005773(vacuole)…	ko04145(Phagosome);ko01100(Metabolic pathways);ko00190(Oxidative phosphorylation)
PC-3p-110122_70	XM_021141082.1	821	843	833	-32.1	-22.3	0.694704	9.5	2-2,842-842;5-22,838-821	1-1,843-843[UP5];3-4,841-839[AILt]	((((((((((((((((((...(.&.)-..))))))))))))))))))	GAGUGAAGUUGACAAGAAGCACA&AG-GAUUCUUGUUAACUUUGCUU	1	26.8255	4	0.99997	Output/S24h/cleaveLand_result/t_plot/PC-3p-110122_70_XM_021141082.1_833_TPlot.pdf	0	0	NA	NA	NA	26.8255	0	Inf	up	2.2264e-07	2.56268e-07	yes	GO:0043933(macromolecular complex subunit organization);GO:0044464(cell part);GO:0006461(protein complex assembly);GO:0022607(cellular component assembly);GO:0009987(cellular process);GO:0005829(cytosol);GO:0071840(cellular component organization or biogenesis);GO:0044424(intracellular part);GO:0005622(intracellular);GO:0044085(cellular component biogenesis);GO:0034622(cellular macromolecular com…	NA
PC-3p-110122_70	XM_021141083.1	821	843	833	-32.1	-22.3	0.694704	9.5	2-2,842-842;5-22,838-821	1-1,843-843[UP5];3-4,841-839[AILt]	((((((((((((((((((...(.&.)-..))))))))))))))))))	GAGUGAAGUUGACAAGAAGCACA&AG-GAUUCUUGUUAACUUUGCUU	0	0	NA	NA	NA	1	30.281	4	0.999888	Output/S0h/cleaveLand_result/t_plot/PC-3p-110122_70_XM_021141083.1_833_TPlot.pdf	0	30.281	-Inf	down	3.7368e-08	6.97196e-08	yes	GO:0043933(macromolecular complex subunit organization);GO:0044464(cell part);GO:0006461(protein complex assembly);GO:0022607(cellular component assembly);GO:0009987(cellular process);GO:0005829(cytosol);GO:0071840(cellular component organization or biogenesis);GO:0044424(intracellular part);GO:0005622(intracellular);GO:0044085(cellular component biogenesis);GO:0034622(cellular macromolecular com…	NA
PC-3p-110122_70	XM_021141085.1	821	843	833	-32.1	-22.3	0.694704	9.5	2-2,842-842;5-22,838-821	1-1,843-843[UP5];3-4,841-839[AILt]	((((((((((((((((((...(.&.)-..))))))))))))))))))	GAGUGAAGUUGACAAGAAGCACA&AG-GAUUCUUGUUAACUUUGCUU	0	0	NA	NA	NA	1	30.281	4	0.999881	Output/S0h/cleaveLand_result/t_plot/PC-3p-110122_70_XM_021141085.1_833_TPlot.pdf	0	30.281	-Inf	down	3.7368e-08	6.97196e-08	yes	GO:0043933(macromolecular complex subunit organization);GO:0044464(cell part);GO:0006461(protein complex assembly);GO:0022607(cellular component assembly);GO:0009987(cellular process);GO:0005829(cytosol);GO:0071840(cellular component organization or biogenesis);GO:0044424(intracellular part);GO:0005622(intracellular);GO:0044085(cellular component biogenesis);GO:0034622(cellular macromolecular com…	NA
PC-3p-110122_70	XM_021142149.1	446	470	462	-32.1	-21.8	0.679128	8	1-3,470-468;5-14,467-458;15-22,453-446	4-4,x-x[BULq];x-x,457-454[BULt]	((((((((....((((((((((-(((&))).))))))))))----))))))))	GAGCAAGGGAAUUUAGCAAGAA-CCU&AGGAUUCUUGUUAA----CUUUGCUU	2	53.6509	2	0.994938	Output/S24h/cleaveLand_result/t_plot/PC-3p-110122_70_XM_021142149.1_462_TPlot.pdf	0	0	NA	NA	NA	53.6509	0	Inf	up	2.3929e-13	9.82167e-13	yes	GO:0043227(membrane-bounded organelle);GO:0043229(intracellular organelle);GO:0043226(organelle);GO:0016020(membrane);GO:0044464(cell part);GO:0043231(intracellular membrane-bounded organelle);GO:0044424(intracellular part);GO:0012505(endomembrane system);GO:0031224(intrinsic component of membrane);GO:0044444(cytoplasmic part);GO:0044425(membrane part);GO:0005737(cytoplasm);GO:0005794(Golgi appar…	ko00040(Pentose and glucuronate interconversions);ko01100(Metabolic pathways)
PC-3p-110122_70	XM_021142728.1	800	821	812	-32.1	-22.48	0.700312	9	2-15,820-807;19-21,803-801	1-1,821-821[UP5];16-18,806-804[SIL];22-22,800-800[UP3]	.(((...((((((((((((((.&.))))))))))))))...))).	UGGUUAUGUUGGCAAGAGUCCA&AGGAUUCUUGUUAACUUUGCUU	1	26.8255	4	0.999899	Output/S24h/cleaveLand_result/t_plot/PC-3p-110122_70_XM_021142728.1_812_TPlot.pdf	0	0	NA	NA	NA	26.8255	0	Inf	up	2.2264e-07	2.56268e-07	yes	GO:0016020(membrane);GO:0031224(intrinsic component of membrane);GO:0044425(membrane part);GO:0016021(integral component of membrane)	NA
PC-3p-110122_70	XM_021142729.1	800	821	812	-32.1	-22.48	0.700312	9	2-15,820-807;19-21,803-801	1-1,821-821[UP5];16-18,806-804[SIL];22-22,800-800[UP3]	.(((...((((((((((((((.&.))))))))))))))...))).	UGGUUAUGUUGGCAAGAGUCCA&AGGAUUCUUGUUAACUUUGCUU	2	53.6509	2	0.957987	Output/S24h/cleaveLand_result/t_plot/PC-3p-110122_70_XM_021142729.1_812_TPlot.pdf	0	0	NA	NA	NA	53.6509	0	Inf	up	2.3929e-13	9.82167e-13	yes	GO:0016020(membrane);GO:0031224(intrinsic component of membrane);GO:0044425(membrane part);GO:0016021(integral component of membrane)	NA
PC-3p-110122_70	XM_021143833.1	1361	1386	1377	-32.1	-22	0.685358	9	1-14,1386-1373;15-16,1371-1370;17-20,1366-1363	x-x,1372-1372[BULt];x-x,1369-1367[BULt];21-22,1362-1361[UP3]	..((((...((.((((((((((((((&))))))))))))))-))---))))..	AUGCGAACGGGAUUGACAAGGAUCCU&AGGAUUCUUGUUAA-CU---UUGCUU	0	0	NA	NA	NA	1	30.281	4	0.999981	Output/S0h/cleaveLand_result/t_plot/PC-3p-110122_70_XM_021143833.1_1377_TPlot.pdf	0	30.281	-Inf	down	3.7368e-08	6.97196e-08	yes	GO:0016875(ligase activity, forming carbon-oxygen bonds);GO:0043604(amide biosynthetic process);GO:0006520(cellular amino acid metabolic process);GO:0009058(biosynthetic process);GO:0005488(binding);GO:0032555(purine ribonucleotide binding);GO:0044260(cellular macromolecule metabolic process);GO:0044249(cellular biosynthetic process);GO:0043603(cellular amide metabolic process);GO:0006082(organic…	ko00970(Aminoacyl-tRNA biosynthesis)
PC-3p-110421_70	XM_016082081.2	724	748	739	-39	-26.4	0.676923	11.5	3-3,746-746;5-10,744-739;12-23,736-725	1-2,748-747[UP5];4-4,745-745[SIL];11-11,738-737[AILt];24-24,724-724[UP3]	.((((((((((((..((((((.(..&..).))))))-.)))))))))))).	UGUCAUCAGAUUUUUGUCACUGGGG&UACGAGUGAC-UGAAUUUGAUGACU	0	0	NA	NA	NA	1	30.281	4	0.388551	Output/S0h/cleaveLand_result/t_plot/PC-3p-110421_70_XM_016082081.2_739_TPlot.pdf	0	30.281	-Inf	down	3.7368e-08	6.97196e-08	yes	NA	NA
PC-3p-110421_70	XM_016092291.2	809	837	828	-39	-25.8	0.661538	14	3-11,835-827;12-17,822-817;18-23,815-810	1-2,837-836[UP5];x-x,826-823[BULt];x-x,816-816[BULt];24-24,809-809[UP3]	.((((((.((((((....(((((((((..&..)))))))))----))))))-)))))).	CGUCAUCGAAAUUUGCAGAGUCACUCGGA&UACGAGUGACU----GAAUUU-GAUGACU	2	53.6509	2	0.217965	Output/S24h/cleaveLand_result/t_plot/PC-3p-110421_70_XM_016092291.2_828_TPlot.pdf	0	0	NA	NA	NA	53.6509	0	Inf	up	2.3929e-13	9.82167e-13	yes	NA	NA
PC-3p-110421_70	XM_016104157.2	603	624	615	-39	-27.6	0.707692	4.5	1-17,624-608;20-24,607-603	18-19,x-x[BULq]	(((((--(((((((((((((((((&)))))))))))))))))..)))))	GGUCG--AAAUUCAGUCACUUGUG&UACGAGUGACUGAAUUUGAUGACU	3	80.4764	3	0.032112	Output/S24h/cleaveLand_result/t_plot/PC-3p-110421_70_XM_016104157.2_615_TPlot.pdf	2	60.562	3	0.0280798	Output/S0h/cleaveLand_result/t_plot/PC-3p-110421_70_XM_016104157.2_615_TPlot.pdf	80.4764	60.562	0.410153	up	0.093557	0.0998676	yes	NA	NA
PC-3p-110421_70	XM_021134730.1	833	861	852	-39	-25.8	0.661538	14	3-11,859-851;12-17,846-841;18-23,839-834	1-2,861-860[UP5];x-x,850-847[BULt];x-x,840-840[BULt];24-24,833-833[UP3]	.((((((.((((((....(((((((((..&..)))))))))----))))))-)))))).	CGUCAUCGAAAUUUGCAGAGUCACUCGGA&UACGAGUGACU----GAAUUU-GAUGACU	1	26.8255	4	0.626756	Output/S24h/cleaveLand_result/t_plot/PC-3p-110421_70_XM_021134730.1_852_TPlot.pdf	0	0	NA	NA	NA	26.8255	0	Inf	up	2.2264e-07	2.56268e-07	yes	NA	NA
PC-3p-110449_70	BGI_novel_T011749	2211	2235	2226	-37.9	-27.6	0.728232	5	2-19,2234-2217;22-24,2213-2211	1-1,2235-2235[UP5];20-21,2216-2214[AILt]	(((...((((((((((((((((((.&.))))))))))))))))))-..)))	GGUAAAAAUCGACUUCAUGUAAAGG&AUUUUACAUGAAGUCGAUU-GCACC	0	0	NA	NA	NA	1	30.281	4	0.776452	Output/S0h/cleaveLand_result/t_plot/PC-3p-110449_70_BGI_novel_T011749_2226_TPlot.pdf	0	30.281	-Inf	down	3.7368e-08	6.97196e-08	yes	NA	NA
PC-3p-110449_70	XM_016107445.2	368	393	384	-37.9	-25.58	0.674934	12	1-4,393-390;7-15,387-379;18-24,374-368	5-6,389-388[SIL];16-17,378-375[AILt]	(((((((....(((((((((..((((&))))..)))))))))--..)))))))	GGUGCGAGGAGGGCUUCGUGGAGGAU&AUUUUACAUGAAGUC--GAUUGCACC	4	107.302	2	0.688955	Output/S24h/cleaveLand_result/t_plot/PC-3p-110449_70_XM_016107445.2_384_TPlot.pdf	0	0	NA	NA	NA	107.302	0	Inf	up	3.8116e-25	8.17156e-24	yes	GO:0005515(protein binding);GO:0005488(binding);GO:0019904(protein domain specific binding)	NA
PC-3p-110449_70	XM_016108540.2	384	413	404	-37.9	-27.3	0.720317	17	6-18,408-396;19-24,389-384	1-5,413-409[UP5];x-x,395-390[BULt]	((((((......(((((((((((((.....&.....)))))))))))))------))))))	GGUGCGUCGCUCGUCGACUUCGUGUUCCUC&AUUUUACAUGAAGUCGAU------UGCACC	0	0	NA	NA	NA	2	60.562	3	0.142181	Output/S0h/cleaveLand_result/t_plot/PC-3p-110449_70_XM_016108540.2_404_TPlot.pdf	0	60.562	-Inf	down	7.123e-15	4.42666e-14	yes	GO:0005740(mitochondrial envelope);GO:0022900(electron transport chain);GO:0019866(organelle inner membrane);GO:0019752(carboxylic acid metabolic process);GO:0044237(cellular metabolic process);GO:0000104(succinate dehydrogenase activity);GO:0043436(oxoacid metabolic process);GO:0050662(coenzyme binding);GO:0044429(mitochondrial part);GO:1901363(heterocyclic compound binding);GO:0031090(organelle…	ko01200(Carbon metabolism);ko00190(Oxidative phosphorylation);ko01100(Metabolic pathways);ko00020(Citrate cycle (TCA cycle));ko01110(Biosynthesis of secondary metabolites)
PC-3p-110481_70	BGI_novel_T003273	2041	2064	2056	-42.3	-28.1	0.664303	7.5	2-8,2063-2057;10-16,2056-2050;17-23,2048-2042	1-1,2064-2064[UP5];9-9,x-x[BULq];x-x,2049-2049[BULt];24-24,2041-2041[UP3]	.(((((((.(((((((-(((((((.&.))))))).)))))))-))))))).	CUUCAGGUAGCAGAUG-UUUUGCGC&ACGUAAAAUCGUCUGC-ACCUGAGU	1	26.8255	4	0.64515	Output/S24h/cleaveLand_result/t_plot/PC-3p-110481_70_BGI_novel_T003273_2056_TPlot.pdf	0	0	NA	NA	NA	26.8255	0	Inf	up	2.2264e-07	2.56268e-07	yes	GO:0016043(cellular component organization);GO:0032502(developmental process);GO:0048856(anatomical structure development);GO:0048869(cellular developmental process);GO:0009987(cellular process);GO:0009653(anatomical structure morphogenesis);GO:0071840(cellular component organization or biogenesis);GO:0000902(cell morphogenesis);GO:0032989(cellular component morphogenesis)	ko03040(Spliceosome)
PC-3p-110481_70	XM_016076506.2	1467	1491	1482	-42.3	-27.8	0.65721	9	2-4,1490-1488;7-15,1485-1477;16-24,1475-1467	1-1,1491-1491[UP5];5-6,1487-1486[SIL];x-x,1476-1476[BULt]	(((((((((.(((((((((..(((.&.)))..)))))))))-)))))))))	GCUUAGGUGAUGGACGGUUGAACGA&ACGUAAAAUCGUCUG-CACCUGAGU	1	26.8255	4	0.731265	Output/S24h/cleaveLand_result/t_plot/PC-3p-110481_70_XM_016076506.2_1482_TPlot.pdf	0	0	NA	NA	NA	26.8255	0	Inf	up	2.2264e-07	2.56268e-07	yes	GO:0009057(macromolecule catabolic process);GO:0036211(protein modification process);GO:0032553(ribonucleotide binding);GO:0036094(small molecule binding);GO:0005737(cytoplasm);GO:0016740(transferase activity);GO:0008152(metabolic process);GO:0016874(ligase activity);GO:0044424(intracellular part);GO:0044238(primary metabolic process);GO:0030163(protein catabolic process);GO:0043226(organelle);GO…	ko04120(Ubiquitin mediated proteolysis)
PC-3p-110481_70	XM_016085373.2	3174	3197	3188	-42.3	-28	0.661939	15	8-24,3190-3174	1-7,3197-3191[UP5]	(((((((((((((((((.......&.......)))))))))))))))))	ACUUGGGUGCAGAUGAUGAGUUUG&ACGUAAAAUCGUCUGCACCUGAGU	1	26.8255	4	0.679265	Output/S24h/cleaveLand_result/t_plot/PC-3p-110481_70_XM_016085373.2_3188_TPlot.pdf	0	0	NA	NA	NA	26.8255	0	Inf	up	2.2264e-07	2.56268e-07	yes	NA	NA
PC-3p-110481_70	XM_016098458.2	1723	1746	1738	-42.3	-28.1	0.664303	7.5	2-8,1745-1739;10-16,1738-1732;17-23,1730-1724	1-1,1746-1746[UP5];9-9,x-x[BULq];x-x,1731-1731[BULt];24-24,1723-1723[UP3]	.(((((((.(((((((-(((((((.&.))))))).)))))))-))))))).	CUUCAGGUAGCAGAUG-UUUUGCGC&ACGUAAAAUCGUCUGC-ACCUGAGU	2	53.6509	2	0.308425	Output/S24h/cleaveLand_result/t_plot/PC-3p-110481_70_XM_016098458.2_1738_TPlot.pdf	0	0	NA	NA	NA	53.6509	0	Inf	up	2.3929e-13	9.82167e-13	yes	GO:0016043(cellular component organization);GO:0032502(developmental process);GO:0048856(anatomical structure development);GO:0048869(cellular developmental process);GO:0009987(cellular process);GO:0009653(anatomical structure morphogenesis);GO:0071840(cellular component organization or biogenesis);GO:0000902(cell morphogenesis);GO:0032989(cellular component morphogenesis)	ko03040(Spliceosome)
PC-3p-110481_70	XM_016098459.2	1710	1733	1725	-42.3	-28.1	0.664303	7.5	2-8,1732-1726;10-16,1725-1719;17-23,1717-1711	1-1,1733-1733[UP5];9-9,x-x[BULq];x-x,1718-1718[BULt];24-24,1710-1710[UP3]	.(((((((.(((((((-(((((((.&.))))))).)))))))-))))))).	CUUCAGGUAGCAGAUG-UUUUGCGC&ACGUAAAAUCGUCUGC-ACCUGAGU	0	0	NA	NA	NA	1	30.281	4	0.542787	Output/S0h/cleaveLand_result/t_plot/PC-3p-110481_70_XM_016098459.2_1725_TPlot.pdf	0	30.281	-Inf	down	3.7368e-08	6.97196e-08	yes	GO:0016043(cellular component organization);GO:0032502(developmental process);GO:0048856(anatomical structure development);GO:0048869(cellular developmental process);GO:0009987(cellular process);GO:0009653(anatomical structure morphogenesis);GO:0071840(cellular component organization or biogenesis);GO:0000902(cell morphogenesis);GO:0032989(cellular component morphogenesis)	ko03040(Spliceosome)
PC-3p-113847_67	BGI_novel_T004791	625	649	640	-42.2	-33.2	0.78673	2	1-14,649-636;16-18,634-632;19-24,630-625	15-15,635-635[SIL];x-x,631-631[BULt]	((((((.(((.((((((((((((((&)))))))))))))).)))-))))))	AACUCAUGUGAAGUCGAUUUCACGU&ACGUGAAAUCGACUGCAC-UGAGUU	1	26.8255	4	0.411787	Output/S24h/cleaveLand_result/t_plot/PC-3p-113847_67_BGI_novel_T004791_640_TPlot.pdf	0	0	NA	NA	NA	26.8255	0	Inf	up	2.2264e-07	2.56268e-07	yes	NA	NA
PC-3p-114045_66	XM_016085999.2	2068	2090	2081	-37.3	-26.7	0.715818	8	1-4,2090-2087;7-11,2084-2080;13-23,2079-2069	5-6,2086-2085[SIL];12-12,x-x[BULq];24-24,2068-2068[UP3]	.(((((((((((-(((((..((((&))))..))))).))))))))))).	UGUCAGGGCUUG-CUUAUCUGCAU&AUGCUAAUAAGACAAGUUCUGACU	0	0	NA	NA	NA	4	121.124	0	0.00402149	Output/S0h/cleaveLand_result/t_plot/PC-3p-114045_66_XM_016085999.2_2081_TPlot.pdf	0	121.124	-Inf	down	3.5765e-28	1.04348e-26	yes	GO:0050789(regulation of biological process);GO:0009987(cellular process);GO:0016310(phosphorylation);GO:0035639(purine ribonucleoside triphosphate binding);GO:0003824(catalytic activity);GO:0006464(cellular protein modification process);GO:0032559(adenyl ribonucleotide binding);GO:0051716(cellular response to stimulus);GO:0097367(carbohydrate derivative binding);GO:0097159(organic cyclic compoun…	ko04016(MAPK signaling pathway - plant)
PC-3p-114614_66	XM_016083347.2	756	779	770	-37.3	-27.6	0.739946	9.5	4-6,776-774;8-24,772-756	1-3,779-777[UP5];7-7,773-773[SIL]	(((((((((((((((((.(((...&...))).)))))))))))))))))	GCUCUCGUGAUGAUGUUGUUAAUA&AUGUAAAGAUAUCAUCACGAGAGU	1	26.8255	4	0.0961385	Output/S24h/cleaveLand_result/t_plot/PC-3p-114614_66_XM_016083347.2_770_TPlot.pdf	1	30.281	4	0.0855575	Output/S0h/cleaveLand_result/t_plot/PC-3p-114614_66_XM_016083347.2_770_TPlot.pdf	26.8255	30.281	-0.17481	down	0.64747	0.647871	yes	GO:1901576(organic substance biosynthetic process);GO:0006497(protein lipidation);GO:0009987(cellular process);GO:0042158(lipoprotein biosynthetic process);GO:0009058(biosynthetic process);GO:0044260(cellular macromolecule metabolic process);GO:1901566(organonitrogen compound biosynthetic process);GO:0008152(metabolic process);GO:0043412(macromolecule modification);GO:0034645(cellular macromolecu…	NA
PC-3p-114614_66	XM_016114267.2	973	996	987	-37.3	-25.2	0.675603	8.5	3-5,994-992;8-17,989-980;19-24,978-973	1-2,996-995[UP5];6-7,991-990[SIL];18-18,979-979[SIL]	((((((.((((((((((..(((..&..)))..)))))))))).))))))	GCUCUCAUGAUGAUAUCACUACUC&AUGUAAAGAUAUCAUCACGAGAGU	1	26.8255	4	0.607407	Output/S24h/cleaveLand_result/t_plot/PC-3p-114614_66_XM_016114267.2_987_TPlot.pdf	0	0	NA	NA	NA	26.8255	0	Inf	up	2.2264e-07	2.56268e-07	yes	NA	NA
PC-3p-114614_66	XM_021132240.1	1803	1827	1817	-37.3	-25.6	0.686327	11.5	2-4,1826-1824;9-24,1818-1803	1-1,1827-1827[UP5];5-8,1823-1819[AILt]	((((((((((((((((.....(((.&.)))-....))))))))))))))))	ACUCUUGUGAUGAUAUGAUGGACAG&AUGU-AAAGAUAUCAUCACGAGAGU	0	0	NA	NA	NA	1	30.281	4	0.331342	Output/S0h/cleaveLand_result/t_plot/PC-3p-114614_66_XM_021132240.1_1817_TPlot.pdf	0	30.281	-Inf	down	3.7368e-08	6.97196e-08	yes	NA	NA
PC-3p-114614_66	XM_021132241.1	1692	1716	1706	-37.3	-25.6	0.686327	11.5	2-4,1715-1713;9-24,1707-1692	1-1,1716-1716[UP5];5-8,1712-1708[AILt]	((((((((((((((((.....(((.&.)))-....))))))))))))))))	ACUCUUGUGAUGAUAUGAUGGACAG&AUGU-AAAGAUAUCAUCACGAGAGU	0	0	NA	NA	NA	1	30.281	4	0.28495	Output/S0h/cleaveLand_result/t_plot/PC-3p-114614_66_XM_021132241.1_1706_TPlot.pdf	0	30.281	-Inf	down	3.7368e-08	6.97196e-08	yes	NA	NA
PC-3p-114792_66	BGI_novel_T001155	2986	3011	3003	-48.5	-32.9	0.678351	9	1-9,3011-3003;12-15,3001-2998;16-19,2994-2991;21-24,2989-2986	10-11,3002-3002[AILq];x-x,2997-2995[BULt];20-20,2990-2990[SIL]	((((.((((...((((.-(((((((((&)))))))))..))))---)))).))))	GGUGGGGUCUUCGACUG-GGGUGAAGU&ACUUCACCUGAAGUC---GACCGCACC	1	26.8255	4	0.51945	Output/S24h/cleaveLand_result/t_plot/PC-3p-114792_66_BGI_novel_T001155_3003_TPlot.pdf	0	0	NA	NA	NA	26.8255	0	Inf	up	2.2264e-07	2.56268e-07	yes	NA	ko03010(Ribosome)
PC-3p-114792_66	BGI_novel_T001355	264	291	282	-48.5	-32.9	0.678351	10.5	2-4,290-288;7-14,285-278;15-18,274-271;19-24,269-264	1-1,291-291[UP5];5-6,287-286[SIL];x-x,277-275[BULt];x-x,270-270[BULt]	((((((.((((...((((((((..(((.&.)))..))))))))---))))-))))))	GGUGCGAGUCGGAAGCUUCAGGGAGAGA&ACUUCACCUGAAGU---CGAC-CGCACC	1	26.8255	4	0.543133	Output/S24h/cleaveLand_result/t_plot/PC-3p-114792_66_BGI_novel_T001355_282_TPlot.pdf	0	0	NA	NA	NA	26.8255	0	Inf	up	2.2264e-07	2.56268e-07	yes	GO:2000112(regulation of cellular macromolecule biosynthetic process);GO:0044464(cell part);GO:0051246(regulation of protein metabolic process);GO:0044248(cellular catabolic process);GO:0043228(non-membrane-bounded organelle);GO:0005737(cytoplasm);GO:0019439(aromatic compound catabolic process);GO:0006139(nucleobase-containing compound metabolic process);GO:0043170(macromolecule metabolic process…	ko03018(RNA degradation)
PC-3p-114792_66	BGI_novel_T002927	2067	2093	2082	-48.5	-32.8	0.676289	8.5	1-5,2093-2089;6-9,2087-2084;11-21,2081-2071;22-24,2069-2067	x-x,2088-2088[BULt];10-10,2083-2082[AILt];x-x,2070-2070[BULt]	(((.(((((((((((..((((.(((((&)))))-))))-.)))))))))))-)))	GGUGGCGGUCGAUUUGGAGGUAGGAGU&ACUUC-ACCU-GAAGUCGACCGC-ACC	1	26.8255	4	0.617204	Output/S24h/cleaveLand_result/t_plot/PC-3p-114792_66_BGI_novel_T002927_2082_TPlot.pdf	1	30.281	4	0.572451	Output/S0h/cleaveLand_result/t_plot/PC-3p-114792_66_BGI_novel_T002927_2082_TPlot.pdf	26.8255	30.281	-0.17481	down	0.64747	0.647871	yes	GO:1901265(nucleoside phosphate binding);GO:0097159(organic cyclic compound binding);GO:1901363(heterocyclic compound binding);GO:0005488(binding);GO:0000166(nucleotide binding);GO:0036094(small molecule binding);GO:0003676(nucleic acid binding)	NA
PC-3p-114792_66	XM_016089737.2	1607	1637	1622	-48.5	-34.5	0.71134	15	1-7,1637-1631;8-22,1624-1610;23-24,1608-1607	x-x,1630-1625[BULt];x-x,1609-1609[BULt]	((.(((((((((((((((......(((((((&)))))))------)))))))))))))))-))	GGUUGUGGUUGACUUCAGUCAUUUGUGAGGU&ACUUCAC------CUGAAGUCGACCGCA-CC	2	53.6509	2	0.107874	Output/S24h/cleaveLand_result/t_plot/PC-3p-114792_66_XM_016089737.2_1622_TPlot.pdf	1	30.281	4	0.252247	Output/S0h/cleaveLand_result/t_plot/PC-3p-114792_66_XM_016089737.2_1622_TPlot.pdf	53.6509	30.281	0.82519	up	0.010743	0.0115483	yes	GO:0009059(macromolecule biosynthetic process);GO:0071704(organic substance metabolic process);GO:0009058(biosynthetic process);GO:0071840(cellular component organization or biogenesis);GO:0044264(cellular polysaccharide metabolic process);GO:0005976(polysaccharide metabolic process);GO:0071555(cell wall organization);GO:0009987(cellular process);GO:0044425(membrane part);GO:0071554(cell wall org…	NA
PC-3p-114792_66	XM_016097165.2	2070	2096	2085	-48.5	-32.8	0.676289	8.5	1-5,2096-2092;6-9,2090-2087;11-21,2084-2074;22-24,2072-2070	x-x,2091-2091[BULt];10-10,2086-2085[AILt];x-x,2073-2073[BULt]	(((.(((((((((((..((((.(((((&)))))-))))-.)))))))))))-)))	GGUGGCGGUCGAUUUGGAGGUAGGAGU&ACUUC-ACCU-GAAGUCGACCGC-ACC	1	26.8255	4	0.607407	Output/S24h/cleaveLand_result/t_plot/PC-3p-114792_66_XM_016097165.2_2085_TPlot.pdf	0	0	NA	NA	NA	26.8255	0	Inf	up	2.2264e-07	2.56268e-07	yes	GO:1901265(nucleoside phosphate binding);GO:0097159(organic cyclic compound binding);GO:1901363(heterocyclic compound binding);GO:0005488(binding);GO:0000166(nucleotide binding);GO:0036094(small molecule binding);GO:0003676(nucleic acid binding)	NA
PC-3p-114792_66	XM_016097166.2	2067	2093	2082	-48.5	-32.8	0.676289	8.5	1-5,2093-2089;6-9,2087-2084;11-21,2081-2071;22-24,2069-2067	x-x,2088-2088[BULt];10-10,2083-2082[AILt];x-x,2070-2070[BULt]	(((.(((((((((((..((((.(((((&)))))-))))-.)))))))))))-)))	GGUGGCGGUCGAUUUGGAGGUAGGAGU&ACUUC-ACCU-GAAGUCGACCGC-ACC	1	26.8255	4	0.626756	Output/S24h/cleaveLand_result/t_plot/PC-3p-114792_66_XM_016097166.2_2082_TPlot.pdf	0	0	NA	NA	NA	26.8255	0	Inf	up	2.2264e-07	2.56268e-07	yes	GO:1901265(nucleoside phosphate binding);GO:0097159(organic cyclic compound binding);GO:1901363(heterocyclic compound binding);GO:0005488(binding);GO:0000166(nucleotide binding);GO:0036094(small molecule binding);GO:0003676(nucleic acid binding)	NA
PC-3p-114792_66	XM_016097167.2	1935	1961	1950	-48.5	-32.8	0.676289	8.5	1-5,1961-1957;6-9,1955-1952;11-21,1949-1939;22-24,1937-1935	x-x,1956-1956[BULt];10-10,1951-1950[AILt];x-x,1938-1938[BULt]	(((.(((((((((((..((((.(((((&)))))-))))-.)))))))))))-)))	GGUGGCGGUCGAUUUGGAGGUAGGAGU&ACUUC-ACCU-GAAGUCGACCGC-ACC	1	26.8255	4	0.59736	Output/S24h/cleaveLand_result/t_plot/PC-3p-114792_66_XM_016097167.2_1950_TPlot.pdf	0	0	NA	NA	NA	26.8255	0	Inf	up	2.2264e-07	2.56268e-07	yes	GO:1901265(nucleoside phosphate binding);GO:0097159(organic cyclic compound binding);GO:1901363(heterocyclic compound binding);GO:0005488(binding);GO:0000166(nucleotide binding);GO:0036094(small molecule binding);GO:0003676(nucleic acid binding)	NA
PC-3p-115095_65	BGI_novel_T000483	1291	1318	1309	-39.4	-25.9	0.65736	14.5	4-13,1315-1306;16-22,1298-1292	1-3,1318-1316[UP5];14-15,1305-1299[AILt];23-23,1291-1291[UP3]	.(((((((.......((((((((((...&...))))))))))-----..))))))).	UGCACAAAGGCAAUGGGACCCUCUGUGA&AAUCGGAGGGUCC-----AAUUUGUGUU	1	26.8255	4	0.99966	Output/S24h/cleaveLand_result/t_plot/PC-3p-115095_65_BGI_novel_T000483_1309_TPlot.pdf	0	0	NA	NA	NA	26.8255	0	Inf	up	2.2264e-07	2.56268e-07	yes	GO:0016740(transferase activity);GO:0008152(metabolic process);GO:0044238(primary metabolic process);GO:1901360(organic cyclic compound metabolic process);GO:0009987(cellular process);GO:0043170(macromolecule metabolic process);GO:0097159(organic cyclic compound binding);GO:0044260(cellular macromolecule metabolic process);GO:0044237(cellular metabolic process);GO:0006725(cellular aromatic compou…	ko00240(Pyrimidine metabolism);ko03030(DNA replication);ko00230(Purine metabolism);ko01100(Metabolic pathways);ko03410(Base excision repair);ko03420(Nucleotide excision repair)
PC-3p-115095_65	BGI_novel_T008590	244	265	256	-39.4	-26.7	0.677665	5.5	1-14,265-252;16-17,251-250;19-20,248-247;22-23,245-244	15-15,x-x[BULq];18-18,249-249[SIL];21-21,246-246[SIL]	((.((.((-((((((((((((((&)))))))))))))).)).)).))	GAGGCCGA-UGGAUCCUCCGAUU&AAUCGGAGGGUCCAAUUUGUGUU	1	26.8255	4	0.969415	Output/S24h/cleaveLand_result/t_plot/PC-3p-115095_65_BGI_novel_T008590_256_TPlot.pdf	0	0	NA	NA	NA	26.8255	0	Inf	up	2.2264e-07	2.56268e-07	yes	GO:0016021(integral component of membrane);GO:0044425(membrane part);GO:0031224(intrinsic component of membrane);GO:0016020(membrane)	ko03030(DNA replication);ko03420(Nucleotide excision repair);ko03430(Mismatch repair);ko00511(Other glycan degradation)
PC-3p-115095_65	BGI_novel_T008592	244	265	256	-39.4	-26.7	0.677665	5.5	1-14,265-252;16-17,251-250;19-20,248-247;22-23,245-244	15-15,x-x[BULq];18-18,249-249[SIL];21-21,246-246[SIL]	((.((.((-((((((((((((((&)))))))))))))).)).)).))	GAGGCCGA-UGGAUCCUCCGAUU&AAUCGGAGGGUCCAAUUUGUGUU	1	26.8255	4	0.967829	Output/S24h/cleaveLand_result/t_plot/PC-3p-115095_65_BGI_novel_T008592_256_TPlot.pdf	0	0	NA	NA	NA	26.8255	0	Inf	up	2.2264e-07	2.56268e-07	yes	GO:0016021(integral component of membrane);GO:0044425(membrane part);GO:0031224(intrinsic component of membrane);GO:0016020(membrane)	ko03030(DNA replication);ko03420(Nucleotide excision repair);ko03430(Mismatch repair);ko00511(Other glycan degradation)
PC-3p-115095_65	XM_016078677.2	1171	1193	1184	-39.4	-31.5	0.799492	5.5	1-4,1193-1190;6-7,1188-1187;9-22,1185-1172	5-5,1189-1189[SIL];8-8,1186-1186[SIL];23-23,1171-1171[UP3]	.((((((((((((((.((.((((&)))).)).)))))))))))))).	UGCACAAAUUGGACCGUCGGAUU&AAUCGGAGGGUCCAAUUUGUGUU	0	0	NA	NA	NA	1	30.281	4	0.0437351	Output/S0h/cleaveLand_result/t_plot/PC-3p-115095_65_XM_016078677.2_1184_TPlot.pdf	0	30.281	-Inf	down	3.7368e-08	6.97196e-08	yes	GO:0016021(integral component of membrane);GO:0016020(membrane);GO:0031224(intrinsic component of membrane);GO:0044425(membrane part)	NA
PC-3p-115095_65	XM_016079456.2	3098	3120	3111	-39.4	-29.3	0.743655	8.5	3-14,3118-3107;17-21,3104-3100	1-2,3120-3119[UP5];15-16,3106-3105[SIL];22-23,3099-3098[UP3]	..(((((..((((((((((((..&..))))))))))))..)))))..	UUCGCAAUCUGGACCCUCUGAAC&AAUCGGAGGGUCCAAUUUGUGUU	0	0	NA	NA	NA	1	30.281	4	0.511065	Output/S0h/cleaveLand_result/t_plot/PC-3p-115095_65_XM_016079456.2_3111_TPlot.pdf	0	30.281	-Inf	down	3.7368e-08	6.97196e-08	yes	NA	ko03015(mRNA surveillance pathway)
PC-3p-115095_65	XM_016086346.2	1533	1555	1546	-39.4	-26.6	0.675127	6.5	2-18,1554-1538;21-23,1535-1533	1-1,1555-1555[UP5];19-20,1537-1536[SIL]	(((..(((((((((((((((((.&.)))))))))))))))))..)))	GACCAAGGUUGGAUCCUUCGAUG&AAUCGGAGGGUCCAAUUUGUGUU	1	26.8255	4	0.975636	Output/S24h/cleaveLand_result/t_plot/PC-3p-115095_65_XM_016086346.2_1546_TPlot.pdf	1	30.281	4	0.962632	Output/S0h/cleaveLand_result/t_plot/PC-3p-115095_65_XM_016086346.2_1546_TPlot.pdf	26.8255	30.281	-0.17481	down	0.64747	0.647871	yes	GO:1901576(organic substance biosynthetic process);GO:0016053(organic acid biosynthetic process);GO:0009987(cellular process);GO:0008652(cellular amino acid biosynthetic process);GO:0016614(oxidoreductase activity, acting on CH-OH group of donors);GO:1901607(alpha-amino acid biosynthetic process);GO:0006520(cellular amino acid metabolic process);GO:0009069(serine family amino acid metabolic proce…	ko01230(Biosynthesis of amino acids);ko01100(Metabolic pathways);ko01200(Carbon metabolism);ko00260(Glycine, serine and threonine metabolism)
PC-3p-115095_65	XM_016094144.2	417	444	435	-39.4	-25.68	0.651777	14.5	3-13,442-432;17-20,423-420;22-23,418-417	1-2,444-443[UP5];14-16,431-424[AILt];21-21,419-419[SIL]	((.((((........(((((((((((..&..)))))))))))-----...)))).))	GAGGCAGUGACGACGGGGCCCUCCGAGC&AAUCGGAGGGUCC-----AAUUUGUGUU	0	0	NA	NA	NA	1	30.281	4	0.999688	Output/S0h/cleaveLand_result/t_plot/PC-3p-115095_65_XM_016094144.2_435_TPlot.pdf	0	30.281	-Inf	down	3.7368e-08	6.97196e-08	yes	GO:0055114(oxidation-reduction process);GO:0003824(catalytic activity);GO:0016491(oxidoreductase activity);GO:0008152(metabolic process)	ko00061(Fatty acid biosynthesis);ko00780(Biotin metabolism);ko01040(Biosynthesis of unsaturated fatty acids);ko01212(Fatty acid metabolism);ko01100(Metabolic pathways)
PC-3p-115095_65	XM_016095093.2	457	481	472	-39.4	-25.98	0.659391	11.5	4-13,478-469;16-22,464-458	1-3,481-479[UP5];14-15,468-465[AILt];23-23,457-457[UP3]	.(((((((....((((((((((...&...))))))))))--..))))))).	UACACAAGGGCAGGACCCUCUGUUU&AAUCGGAGGGUCC--AAUUUGUGUU	1	26.8255	4	0.999326	Output/S24h/cleaveLand_result/t_plot/PC-3p-115095_65_XM_016095093.2_472_TPlot.pdf	5	151.405	3	0.469092	Output/S0h/cleaveLand_result/t_plot/PC-3p-115095_65_XM_016095093.2_472_TPlot.pdf	26.8255	151.405	-2.49674	down	1.0388e-20	1.52342e-19	yes	GO:0019222(regulation of metabolic process);GO:0000079(regulation of cyclin-dependent protein serine/threonine kinase activity);GO:0050790(regulation of catalytic activity);GO:0051174(regulation of phosphorus metabolic process);GO:1904029(regulation of cyclin-dependent protein kinase activity);GO:0051171(regulation of nitrogen compound metabolic process);GO:0031399(regulation of protein modificat…	ko01110(Biosynthesis of secondary metabolites);ko00630(Glyoxylate and dicarboxylate metabolism);ko01200(Carbon metabolism);ko01210(2-Oxocarboxylic acid metabolism);ko01100(Metabolic pathways);ko01230(Biosynthesis of amino acids);ko00020(Citrate cycle (TCA cycle))
PC-3p-115095_65	XM_016100746.2	234	256	247	-39.4	-28.7	0.728426	9	5-14,252-243;16-23,241-234	1-4,256-253[UP5];15-15,242-242[SIL]	((((((((.((((((((((....&....)))))))))).))))))))	AACACAAAAUGGAUCCUCCUCCU&AAUCGGAGGGUCCAAUUUGUGUU	1	26.8255	4	0.763162	Output/S24h/cleaveLand_result/t_plot/PC-3p-115095_65_XM_016100746.2_247_TPlot.pdf	0	0	NA	NA	NA	26.8255	0	Inf	up	2.2264e-07	2.56268e-07	yes	GO:1901564(organonitrogen compound metabolic process);GO:0003824(catalytic activity);GO:0019752(carboxylic acid metabolic process);GO:0009987(cellular process);GO:0006082(organic acid metabolic process);GO:0016740(transferase activity);GO:0044238(primary metabolic process);GO:0043436(oxoacid metabolic process);GO:0004084(branched-chain-amino-acid transaminase activity);GO:0016769(transferase acti…	ko00270(Cysteine and methionine metabolism);ko01110(Biosynthesis of secondary metabolites);ko00770(Pantothenate and CoA biosynthesis);ko01210(2-Oxocarboxylic acid metabolism);ko01100(Metabolic pathways);ko00280(Valine, leucine and isoleucine degradation);ko00290(Valine, leucine and isoleucine biosynthesis);ko01230(Biosynthesis of amino acids)
PC-3p-115095_65	XM_016101439.2	333	354	345	-39.4	-28.8	0.730964	7	1-13,354-342;17-21,339-335	14-16,341-340[AILq];22-23,334-333[UP3]	..(((((..-(((((((((((((&)))))))))))))...)))))..	GCCACGGCG-GGGCCCUCCGAUU&AAUCGGAGGGUCCAAUUUGUGUU	1	26.8255	4	0.737971	Output/S24h/cleaveLand_result/t_plot/PC-3p-115095_65_XM_016101439.2_345_TPlot.pdf	0	0	NA	NA	NA	26.8255	0	Inf	up	2.2264e-07	2.56268e-07	yes	GO:0008270(zinc ion binding);GO:0043167(ion binding);GO:0031224(intrinsic component of membrane);GO:0044425(membrane part);GO:0005488(binding);GO:0046872(metal ion binding);GO:0043169(cation binding);GO:0016021(integral component of membrane);GO:0016020(membrane);GO:0046914(transition metal ion binding)	ko04141(Protein processing in endoplasmic reticulum)
PC-3p-115095_65	XM_016106938.2	660	681	672	-39.4	-27.8	0.705584	8	3-19,679-663;21-23,662-660	1-2,681-680[UP5];20-20,x-x[BULq]	(((-(((((((((((((((((..&..))))))))))))))))).)))	GGC-CAAAUUGGACCCUUUGGCU&AAUCGGAGGGUCCAAUUUGUGUU	0	0	NA	NA	NA	2	60.562	2	0.43787	Output/S0h/cleaveLand_result/t_plot/PC-3p-115095_65_XM_016106938.2_672_TPlot.pdf	0	60.562	-Inf	down	7.123e-15	4.42666e-14	yes	GO:0044464(cell part);GO:0072350(tricarboxylic acid metabolic process);GO:0045239(tricarboxylic acid cycle enzyme complex);GO:0036094(small molecule binding);GO:0016903(oxidoreductase activity, acting on the aldehyde or oxo group of donors);GO:0015980(energy derivation by oxidation of organic compounds);GO:0005488(binding);GO:0005737(cytoplasm);GO:0044281(small molecule metabolic process);GO:0016…	ko00380(Tryptophan metabolism);ko00310(Lysine degradation);ko01100(Metabolic pathways);ko00020(Citrate cycle (TCA cycle));ko01110(Biosynthesis of secondary metabolites);ko01200(Carbon metabolism)
PC-3p-115095_65	XM_016108308.2	308	332	322	-39.4	-25.9	0.65736	9.5	3-8,330-325;9-13,323-319;16-19,316-313;20-23,311-308	1-2,332-331[UP5];x-x,324-324[BULt];14-15,318-317[SIL];x-x,312-312[BULt]	((((.((((..(((((.((((((..&..))))))-)))))..))))-))))	GGCGUCAAAGAGGACCUCUCCGAGC&AAUCGGAG-GGUCCAAUUUG-UGUU	3	80.4764	2	0.922998	Output/S24h/cleaveLand_result/t_plot/PC-3p-115095_65_XM_016108308.2_322_TPlot.pdf	0	0	NA	NA	NA	80.4764	0	Inf	up	2.9371e-19	3.092e-18	yes	NA	NA
PC-3p-115095_65	XM_016108425.2	1002	1024	1015	-39.4	-25.7	0.652284	12.5	6-9,1019-1016;11-23,1014-1002	1-5,1024-1020[UP5];10-10,1015-1015[SIL]	(((((((((((((.((((.....&.....)))).)))))))))))))	GACACAAAUUGGAGUCUCGUAUG&AAUCGGAGGGUCCAAUUUGUGUU	1	26.8255	4	0.999873	Output/S24h/cleaveLand_result/t_plot/PC-3p-115095_65_XM_016108425.2_1015_TPlot.pdf	0	0	NA	NA	NA	26.8255	0	Inf	up	2.2264e-07	2.56268e-07	yes	GO:0008194(UDP-glycosyltransferase activity);GO:0016758(transferase activity, transferring hexosyl groups);GO:0042285(xylosyltransferase activity);GO:0044038(cell wall macromolecule biosynthetic process);GO:0005976(polysaccharide metabolic process);GO:0009059(macromolecule biosynthetic process);GO:0005975(carbohydrate metabolic process);GO:0016763(transferase activity, transferring pentosyl group…	NA
PC-3p-115095_65	XM_016108467.2	1158	1181	1172	-39.4	-26.1	0.662437	11	4-6,1178-1176;8-12,1174-1170;13-22,1168-1159	1-3,1181-1179[UP5];7-7,1175-1175[SIL];x-x,1169-1169[BULt];23-23,1158-1158[UP3]	.((((((((((.(((((.(((...&...))).)))))-)))))))))).	UACAUAAGUUGAGACCCCCCGGAU&AAUCGGAGGGUC-CAAUUUGUGUU	1	26.8255	4	0.997791	Output/S24h/cleaveLand_result/t_plot/PC-3p-115095_65_XM_016108467.2_1172_TPlot.pdf	0	0	NA	NA	NA	26.8255	0	Inf	up	2.2264e-07	2.56268e-07	yes	NA	ko04075(Plant hormone signal transduction);ko04933(AGE-RAGE signaling pathway in diabetic complications)
PC-3p-115095_65	XM_016109779.2	2850	2872	2863	-39.4	-26	0.659898	10	4-11,2869-2862;13-20,2860-2853	1-3,2872-2870[UP5];12-12,2861-2861[SIL];21-23,2852-2850[UP3]	...((((((((.((((((((...&...)))))))).))))))))...	AGAACAAAUUGAACCCUCCGGAU&AAUCGGAGGGUCCAAUUUGUGUU	1	26.8255	4	0.998965	Output/S24h/cleaveLand_result/t_plot/PC-3p-115095_65_XM_016109779.2_2863_TPlot.pdf	0	0	NA	NA	NA	26.8255	0	Inf	up	2.2264e-07	2.56268e-07	yes	GO:0032555(purine ribonucleotide binding);GO:0036094(small molecule binding);GO:0016817(hydrolase activity, acting on acid anhydrides);GO:0043168(anion binding);GO:0003824(catalytic activity);GO:0032559(adenyl ribonucleotide binding);GO:0016818(hydrolase activity, acting on acid anhydrides, in phosphorus-containing anhydrides);GO:0004386(helicase activity);GO:0097159(organic cyclic compound bindi…	ko03018(RNA degradation)
PC-3p-115095_65	XM_016113039.2	2378	2398	2389	-39.4	-25.7	0.652284	7	1-14,2398-2385;17-19,2383-2381;21-23,2380-2378	15-16,2384-2384[AILq];20-20,x-x[BULq]	(((-(((.-((((((((((((((&))))))))))))))..))).)))	GAC-CAGC-UGGGCCCUCUGGUU&AAUCGGAGGGUCCAAUUUGUGUU	2	53.6509	2	0.95493	Output/S24h/cleaveLand_result/t_plot/PC-3p-115095_65_XM_016113039.2_2389_TPlot.pdf	1	30.281	4	0.999627	Output/S0h/cleaveLand_result/t_plot/PC-3p-115095_65_XM_016113039.2_2389_TPlot.pdf	53.6509	30.281	0.82519	up	0.010743	0.0115483	yes	GO:0016788(hydrolase activity, acting on ester bonds);GO:1901363(heterocyclic compound binding);GO:0006725(cellular aromatic compound metabolic process);GO:0046914(transition metal ion binding);GO:0071704(organic substance metabolic process);GO:0005488(binding);GO:0044237(cellular metabolic process);GO:0090305(nucleic acid phosphodiester bond hydrolysis);GO:0006807(nitrogen compound metabolic pro…	ko04016(MAPK signaling pathway - plant)
PC-3p-115095_65	XM_016113537.2	6398	6421	6412	-39.4	-27.2	0.690355	11.5	5-14,6417-6408;17-22,6404-6399	1-4,6421-6418[UP5];15-16,6407-6405[AILt];23-23,6398-6398[UP3]	.((((((...((((((((((....&....))))))))))-..)))))).	UACACAGUACUGGACCCUCCUGUU&AAUCGGAGGGUCCA-AUUUGUGUU	0	0	NA	NA	NA	1	30.281	4	0.906536	Output/S0h/cleaveLand_result/t_plot/PC-3p-115095_65_XM_016113537.2_6412_TPlot.pdf	0	30.281	-Inf	down	3.7368e-08	6.97196e-08	yes	NA	NA
PC-3p-115095_65	XM_021128910.1	3098	3120	3111	-39.4	-29.3	0.743655	8.5	3-14,3118-3107;17-21,3104-3100	1-2,3120-3119[UP5];15-16,3106-3105[SIL];22-23,3099-3098[UP3]	..(((((..((((((((((((..&..))))))))))))..)))))..	UUCGCAAUCUGGACCCUCUGAAC&AAUCGGAGGGUCCAAUUUGUGUU	0	0	NA	NA	NA	1	30.281	4	0.552897	Output/S0h/cleaveLand_result/t_plot/PC-3p-115095_65_XM_021128910.1_3111_TPlot.pdf	0	30.281	-Inf	down	3.7368e-08	6.97196e-08	yes	NA	ko03015(mRNA surveillance pathway)
PC-3p-115095_65	XM_021128912.1	2580	2602	2593	-39.4	-29.3	0.743655	8.5	3-14,2600-2589;17-21,2586-2582	1-2,2602-2601[UP5];15-16,2588-2587[SIL];22-23,2581-2580[UP3]	..(((((..((((((((((((..&..))))))))))))..)))))..	UUCGCAAUCUGGACCCUCUGAAC&AAUCGGAGGGUCCAAUUUGUGUU	0	0	NA	NA	NA	1	30.281	4	0.542787	Output/S0h/cleaveLand_result/t_plot/PC-3p-115095_65_XM_021128912.1_2593_TPlot.pdf	0	30.281	-Inf	down	3.7368e-08	6.97196e-08	yes	NA	ko03015(mRNA surveillance pathway)
PC-3p-115095_65	XM_021134214.1	1549	1571	1562	-39.4	-30.3	0.769036	10	5-17,1567-1555;19-22,1553-1550	1-4,1571-1568[UP5];18-18,1554-1554[SIL];23-23,1549-1549[UP3]	.((((.(((((((((((((....&....))))))))))))).)))).	UGCACCAGUUGGACCCUCCAAUG&AAUCGGAGGGUCCAAUUUGUGUU	1	26.8255	4	0.223298	Output/S24h/cleaveLand_result/t_plot/PC-3p-115095_65_XM_021134214.1_1562_TPlot.pdf	0	0	NA	NA	NA	26.8255	0	Inf	up	2.2264e-07	2.56268e-07	yes	GO:0044237(cellular metabolic process);GO:0009987(cellular process);GO:0006793(phosphorus metabolic process);GO:0016772(transferase activity, transferring phosphorus-containing groups);GO:0016301(kinase activity);GO:0016310(phosphorylation);GO:0008152(metabolic process);GO:0006796(phosphate-containing compound metabolic process);GO:0016740(transferase activity);GO:0003824(catalytic activity);GO:0…	NA
PC-3p-115095_65	XM_021136144.1	925	948	939	-39.4	-25.9	0.65736	9	2-7,947-942;9-13,940-936;16-20,932-928;22-23,926-925	1-1,948-948[UP5];8-8,941-941[SIL];14-15,935-933[AILt];21-21,927-927[SIL]	((.(((((...(((((.((((((.&.)))))).)))))-..))))).))	GAGACAGAGCAGGGCCGUCCGAUC&AAUCGGAGGGUCC-AAUUUGUGUU	0	0	NA	NA	NA	1	30.281	4	0.998956	Output/S0h/cleaveLand_result/t_plot/PC-3p-115095_65_XM_021136144.1_939_TPlot.pdf	0	30.281	-Inf	down	3.7368e-08	6.97196e-08	yes	GO:0051603(proteolysis involved in cellular protein catabolic process);GO:0043170(macromolecule metabolic process);GO:1901565(organonitrogen compound catabolic process);GO:0006464(cellular protein modification process);GO:0006807(nitrogen compound metabolic process);GO:0019787(ubiquitin-like protein transferase activity);GO:0044257(cellular protein catabolic process);GO:0000209(protein polyubiqui…	NA
PC-3p-116071_65	XM_016077360.2	1331	1354	1345	-37.3	-25.2	0.675603	14.5	7-20,1348-1335;23-24,1332-1331	1-6,1354-1349[UP5];21-22,1334-1333[SIL]	((..((((((((((((((......&......))))))))))))))..))	AGAAUGAGAGGCCAGUGUCUUCCC&AUAAAAAUACUGGCCUCUUAGACU	2	53.6509	2	0.264585	Output/S24h/cleaveLand_result/t_plot/PC-3p-116071_65_XM_016077360.2_1345_TPlot.pdf	0	0	NA	NA	NA	53.6509	0	Inf	up	2.3929e-13	9.82167e-13	yes	GO:0016020(membrane);GO:0044464(cell part);GO:0012505(endomembrane system);GO:0005623(cell)	NA
PC-3p-116071_65	XM_016102029.2	849	872	863	-37.3	-26.4	0.707775	12.5	6-18,867-855;20-23,853-850	1-5,872-868[UP5];19-19,854-854[SIL];24-24,849-849[UP3]	.((((.(((((((((((((.....&.....))))))))))))).)))).	CGUUUCAGAGGCCAGUGUUGUGUA&AUAAAAAUACUGGCCUCUUAGACU	0	0	NA	NA	NA	1	30.281	4	0.182285	Output/S0h/cleaveLand_result/t_plot/PC-3p-116071_65_XM_016102029.2_863_TPlot.pdf	0	30.281	-Inf	down	3.7368e-08	6.97196e-08	yes	GO:0046903(secretion);GO:0051640(organelle localization);GO:0006904(vesicle docking involved in exocytosis);GO:0051234(establishment of localization);GO:0048278(vesicle docking);GO:0032940(secretion by cell);GO:0006887(exocytosis);GO:0009987(cellular process);GO:0140056(organelle localization by membrane tethering);GO:0016192(vesicle-mediated transport);GO:0051641(cellular localization);GO:002240…	NA
PC-3p-117208_64	BGI_novel_T007646	2163	2186	2177	-39.9	-26.8	0.671679	13.5	5-18,2182-2169	1-4,2186-2183[UP5];19-24,2168-2163[UP3]	......((((((((((((((....&....))))))))))))))......	AUUAAGGGCCGAGAGUCGUUCAUA&AUUUAACGACUCUCGGCUAUCAAC	0	0	NA	NA	NA	2	60.562	1	0.0472925	Output/S0h/cleaveLand_result/t_plot/PC-3p-117208_64_BGI_novel_T007646_2177_TPlot.pdf	0	60.562	-Inf	down	7.123e-15	4.42666e-14	yes	GO:0016021(integral component of membrane);GO:0044425(membrane part);GO:0031224(intrinsic component of membrane);GO:0016020(membrane)	NA
PC-3p-117208_64	XM_016087891.2	1647	1670	1661	-39.9	-32.9	0.824561	2.5	1-16,1670-1655;18-24,1653-1647	17-17,1654-1654[SIL]	(((((((.((((((((((((((((&)))))))))))))))).)))))))	GUUGAUAUCUGAGAGUCGUUAGAU&AUUUAACGACUCUCGGCUAUCAAC	7	187.778	2	0.123404	Output/S24h/cleaveLand_result/t_plot/PC-3p-117208_64_XM_016087891.2_1661_TPlot.pdf	4	121.124	2	0.108816	Output/S0h/cleaveLand_result/t_plot/PC-3p-117208_64_XM_016087891.2_1661_TPlot.pdf	187.778	121.124	0.632545	up	0.000149	0.000168841	yes	GO:0006807(nitrogen compound metabolic process);GO:0006508(proteolysis);GO:0044238(primary metabolic process);GO:0019538(protein metabolic process);GO:0030163(protein catabolic process);GO:1901564(organonitrogen compound metabolic process);GO:0008233(peptidase activity);GO:0003824(catalytic activity);GO:0004175(endopeptidase activity);GO:0070001(aspartic-type peptidase activity);GO:1901565(organo…	ko03010(Ribosome)
PC-3p-117208_64	XM_016100506.2	717	741	732	-39.9	-26.3	0.659148	16	7-14,735-728;15-21,726-720	1-6,741-736[UP5];x-x,727-727[BULt];22-24,719-717[UP3]	...(((((((.((((((((......&......))))))))-)))))))...	UUCGGUGGCCGGAGAGUCGGGACUC&AUUUAACGACUCUC-GGCUAUCAAC	0	0	NA	NA	NA	1	30.281	4	0.948896	Output/S0h/cleaveLand_result/t_plot/PC-3p-117208_64_XM_016100506.2_732_TPlot.pdf	0	30.281	-Inf	down	3.7368e-08	6.97196e-08	yes	GO:0016020(membrane);GO:0016021(integral component of membrane);GO:0016740(transferase activity);GO:0032259(methylation);GO:0008168(methyltransferase activity);GO:0044425(membrane part);GO:0008152(metabolic process);GO:0016741(transferase activity, transferring one-carbon groups);GO:0031224(intrinsic component of membrane);GO:0003824(catalytic activity)	NA
PC-3p-117208_64	XM_016102742.2	1314	1337	1328	-39.9	-27.4	0.686717	9.5	1-3,1337-1335;5-19,1333-1319	4-4,1334-1334[SIL];20-24,1318-1314[UP3]	.....(((((((((((((((.(((&))).))))))))))))))).....	CGUCUUGGCCGAGGGUCGUUUGAU&AUUUAACGACUCUCGGCUAUCAAC	6	160.953	3	0.233662	Output/S24h/cleaveLand_result/t_plot/PC-3p-117208_64_XM_016102742.2_1328_TPlot.pdf	10	302.81	2	0.556967	Output/S0h/cleaveLand_result/t_plot/PC-3p-117208_64_XM_016102742.2_1328_TPlot.pdf	160.953	302.81	-0.911775	down	4.4578e-11	1.79888e-10	yes	GO:0004013(adenosylhomocysteinase activity);GO:0034641(cellular nitrogen compound metabolic process);GO:0044281(small molecule metabolic process);GO:0044238(primary metabolic process);GO:0009116(nucleoside metabolic process);GO:0006534(cysteine metabolic process);GO:0071704(organic substance metabolic process);GO:0046128(purine ribonucleoside metabolic process);GO:0019752(carboxylic acid metaboli…	ko00270(Cysteine and methionine metabolism);ko01100(Metabolic pathways)
PC-3p-117208_64	XM_016112794.2	1982	2005	1996	-39.9	-26.8	0.671679	13.5	5-18,2001-1988	1-4,2005-2002[UP5];19-24,1987-1982[UP3]	......((((((((((((((....&....))))))))))))))......	AUUAAGGGCCGAGAGUCGUUCAUA&AUUUAACGACUCUCGGCUAUCAAC	1	26.8255	4	0.946672	Output/S24h/cleaveLand_result/t_plot/PC-3p-117208_64_XM_016112794.2_1996_TPlot.pdf	1	30.281	4	0.925263	Output/S0h/cleaveLand_result/t_plot/PC-3p-117208_64_XM_016112794.2_1996_TPlot.pdf	26.8255	30.281	-0.17481	down	0.64747	0.647871	yes	GO:0016021(integral component of membrane);GO:0044425(membrane part);GO:0031224(intrinsic component of membrane);GO:0016020(membrane)	NA
PC-3p-117208_64	XM_021137405.1	412	436	427	-39.9	-26	0.651629	16	8-14,429-423;15-24,421-412	1-7,436-430[UP5];x-x,422-422[BULt]	((((((((((.(((((((.......&.......)))))))-))))))))))	GUUGAUGGCUAGAGGGUCAAUUAGA&AUUUAACGACUCUC-GGCUAUCAAC	0	0	NA	NA	NA	1	30.281	4	0.982529	Output/S0h/cleaveLand_result/t_plot/PC-3p-117208_64_XM_021137405.1_427_TPlot.pdf	0	30.281	-Inf	down	3.7368e-08	6.97196e-08	yes	GO:0005840(ribosome);GO:0030529(intracellular ribonucleoprotein complex);GO:0005622(intracellular);GO:0032991(macromolecular complex);GO:0005737(cytoplasm);GO:1990904(ribonucleoprotein complex);GO:0043232(intracellular non-membrane-bounded organelle);GO:0044424(intracellular part);GO:0043229(intracellular organelle);GO:0005623(cell);GO:0044444(cytoplasmic part);GO:0043226(organelle);GO:0044464(ce…	ko03010(Ribosome)
PC-3p-117669_63	BGI_novel_T014163	500	523	515	-38.4	-28.3	0.736979	5.5	2-5,522-519;7-13,518-512;14-24,510-500	1-1,523-523[UP5];6-6,x-x[BULq];x-x,511-511[BULt]	(((((((((((.(((((((-((((.&.)))).)))))))-)))))))))))	GGUGGGGUCGGUCUUCAUA-GAAAA&AUUUCAUAUGAAG-UCGACUUCACC	2	53.6509	3	0.0841236	Output/S24h/cleaveLand_result/t_plot/PC-3p-117669_63_BGI_novel_T014163_515_TPlot.pdf	0	0	NA	NA	NA	53.6509	0	Inf	up	2.3929e-13	9.82167e-13	yes	NA	ko01100(Metabolic pathways);ko00190(Oxidative phosphorylation)
PC-3p-117669_63	XM_016081484.2	1194	1219	1209	-38.4	-26.1	0.679688	11.5	3-5,1217-1215;6-9,1213-1210;11-14,1208-1205;15-24,1203-1194	1-2,1219-1218[UP5];x-x,1214-1214[BULt];10-10,1209-1209[SIL];x-x,1204-1204[BULt]	((((((((((.((((.((((.(((..&..)))-)))).))))-))))))))))	GGUGAGGUCGUACUUGGUGUCGGAUG&AUUUC-AUAUGAAGU-CGACUUCACC	4	107.302	2	0.47783	Output/S24h/cleaveLand_result/t_plot/PC-3p-117669_63_XM_016081484.2_1209_TPlot.pdf	0	0	NA	NA	NA	107.302	0	Inf	up	3.8116e-25	8.17156e-24	yes	GO:0016747(transferase activity, transferring acyl groups other than amino-acyl groups);GO:0003824(catalytic activity);GO:0016740(transferase activity);GO:0016746(transferase activity, transferring acyl groups)	NA
PC-3p-117669_63	XM_016096850.2	532	555	546	-38.4	-27.4	0.713542	9.5	3-10,553-546;13-24,543-532	1-2,555-554[UP5];11-12,545-544[SIL]	((((((((((((..((((((((..&..))))))))..))))))))))))	GGUGGGGUUGACAACAUAUGGAUU&AUUUCAUAUGAAGUCGACUUCACC	2	53.6509	3	0.146298	Output/S24h/cleaveLand_result/t_plot/PC-3p-117669_63_XM_016096850.2_546_TPlot.pdf	1	30.281	4	0.755537	Output/S0h/cleaveLand_result/t_plot/PC-3p-117669_63_XM_016096850.2_546_TPlot.pdf	53.6509	30.281	0.82519	up	0.010743	0.0115483	yes	GO:0008152(metabolic process);GO:0043414(macromolecule methylation);GO:1990259(histone-glutamine methyltransferase activity);GO:0034470(ncRNA processing);GO:0043628(ncRNA 3'-end processing);GO:0018364(peptidyl-glutamine methylation);GO:0031167(rRNA methylation);GO:0042054(histone methyltransferase activity);GO:0031974(membrane-enclosed lumen);GO:0019538(protein metabolic process);GO:0043144(snoRN…	ko03008(Ribosome biogenesis in eukaryotes)
PC-3p-117669_63	XM_021143533.1	525	548	539	-38.4	-27.7	0.721354	9.5	3-10,546-539;13-24,536-525	1-2,548-547[UP5];11-12,538-537[SIL]	((((((((((((..((((((((..&..))))))))..))))))))))))	GGUGGGGUUGACAACAUAUGGAUU&AUUUCAUAUGAAGUCGACUUCACC	1	26.8255	4	0.750884	Output/S24h/cleaveLand_result/t_plot/PC-3p-117669_63_XM_021143533.1_539_TPlot.pdf	0	0	NA	NA	NA	26.8255	0	Inf	up	2.2264e-07	2.56268e-07	yes	GO:0008033(tRNA processing);GO:0016072(rRNA metabolic process);GO:0000154(rRNA modification);GO:0031167(rRNA methylation);GO:1990259(histone-glutamine methyltransferase activity);GO:0044446(intracellular organelle part);GO:0031428(box C/D snoRNP complex);GO:0005634(nucleus);GO:0044085(cellular component biogenesis);GO:0006807(nitrogen compound metabolic process);GO:0016740(transferase activity);G…	ko03008(Ribosome biogenesis in eukaryotes)
PC-3p-117903_63	XM_016115252.2	772	795	786	-31.1	-24.1	0.77492	8.5	3-15,793-781;18-24,778-772	1-2,795-794[UP5];16-17,780-779[SIL]	(((((((..(((((((((((((..&..)))))))))))))..)))))))	GGUGUUCCUGUUGUUUUGGUCGAG&AACGAUUAAAAUAAUUAGAACACC	1	26.8255	4	0.0961385	Output/S24h/cleaveLand_result/t_plot/PC-3p-117903_63_XM_016115252.2_786_TPlot.pdf	0	0	NA	NA	NA	26.8255	0	Inf	up	2.2264e-07	2.56268e-07	yes	GO:1901265(nucleoside phosphate binding);GO:0098588(bounding membrane of organelle);GO:0005488(binding);GO:0043227(membrane-bounded organelle);GO:0022857(transmembrane transporter activity);GO:0044446(intracellular organelle part);GO:0009507(chloroplast);GO:0071702(organic substance transport);GO:0044422(organelle part);GO:0097367(carbohydrate derivative binding);GO:0005515(protein binding);GO:00…	NA
PC-3p-118336_63	XM_016111193.2	12249	12274	12265	-43	-31.7	0.737209	9.5	4-19,12271-12256;20-24,12253-12249	1-3,12274-12272[UP5];x-x,12255-12254[BULt]	(((((..((((((((((((((((...&...))))))))))))))))--)))))	GCUCAGUGGUGCAGUUGAUUUGACAU&AAAUCAAGUCGACUGCACC--UGAGU	0	0	NA	NA	NA	5	151.405	2	0.135778	Output/S0h/cleaveLand_result/t_plot/PC-3p-118336_63_XM_016111193.2_12265_TPlot.pdf	0	151.405	-Inf	down	8.4988e-35	3.87985e-33	yes	GO:0022618(ribonucleoprotein complex assembly);GO:0005524(ATP binding);GO:0005488(binding);GO:0022607(cellular component assembly);GO:0032559(adenyl ribonucleotide binding);GO:0016887(ATPase activity);GO:0005634(nucleus);GO:0032553(ribonucleotide binding);GO:0035639(purine ribonucleoside triphosphate binding);GO:0044085(cellular component biogenesis);GO:0036094(small molecule binding);GO:0071826(…	ko03008(Ribosome biogenesis in eukaryotes)
PC-3p-118336_63	XM_016113770.2	1641	1664	1654	-43	-29.2	0.67907	5.5	1-6,1664-1659;7-18,1657-1646;20-24,1645-1641	x-x,1658-1658[BULt];19-19,x-x[BULq]	(((((-((((((((((((.((((((&))))))-)))))))))))).)))))	GCUCA-GUGCAGUUGAUUCUGAUUU&AAAUCA-AGUCGACUGCACCUGAGU	0	0	NA	NA	NA	1	30.281	4	0.581905	Output/S0h/cleaveLand_result/t_plot/PC-3p-118336_63_XM_016113770.2_1654_TPlot.pdf	0	30.281	-Inf	down	3.7368e-08	6.97196e-08	yes	GO:0070011(peptidase activity, acting on L-amino acid peptides);GO:0008233(peptidase activity);GO:1901564(organonitrogen compound metabolic process);GO:0044238(primary metabolic process);GO:0019538(protein metabolic process);GO:0003824(catalytic activity);GO:0006807(nitrogen compound metabolic process);GO:0016021(integral component of membrane);GO:0016787(hydrolase activity);GO:0004180(carboxypep…	NA
PC-3p-119396_62	BGI_novel_T009318	248	279	262	-37.9	-26.4	0.69657	21	1-7,279-273;8-21,264-251	x-x,272-265[BULt];22-24,250-248[UP3]	...((((((((((((((........(((((((&)))))))--------))))))))))))))...	GGAGGUUCAGUUUGGUUGUCGUCGCUGGGUUU&AAAUCCG--------AACCAAACUGAACCAAU	1	26.8255	4	0.757101	Output/S24h/cleaveLand_result/t_plot/PC-3p-119396_62_BGI_novel_T009318_262_TPlot.pdf	0	0	NA	NA	NA	26.8255	0	Inf	up	2.2264e-07	2.56268e-07	yes	NA	NA
PC-3p-119396_62	BGI_novel_T011434	421	441	433	-37.9	-24.7	0.651715	6	2-6,440-436;8-11,435-432;14-24,431-421	1-1,441-441[UP5];7-7,x-x[BULq];12-13,x-x[BULq]	(((((((((((--((((-(((((.&.))))).))))..)))))))))))	AUUGGUUCAGU--GGUU-GGAUUC&AAAUCCGAACCAAACUGAACCAAU	3	80.4764	2	0.788634	Output/S24h/cleaveLand_result/t_plot/PC-3p-119396_62_BGI_novel_T011434_433_TPlot.pdf	0	0	NA	NA	NA	80.4764	0	Inf	up	2.9371e-19	3.092e-18	yes	GO:0003824(catalytic activity);GO:0016788(hydrolase activity, acting on ester bonds);GO:0016787(hydrolase activity);GO:0043167(ion binding);GO:0004722(protein serine/threonine phosphatase activity);GO:0005488(binding);GO:0004721(phosphoprotein phosphatase activity);GO:0016791(phosphatase activity);GO:0042578(phosphoric ester hydrolase activity);GO:0043169(cation binding);GO:0046872(metal ion bind…	NA
PC-3p-119396_62	XM_016077837.2	472	495	485	-37.9	-27	0.712401	7	2-8,494-488;10-18,485-477;20-24,476-472	1-1,495-495[UP5];9-9,487-486[AILt];19-19,x-x[BULq]	(((((-(((((((((..(((((((.&.)))))))-.))))))))).)))))	AUUGG-UCAGUUUGGAGUCGGGUUC&AAAUCCGA-ACCAAACUGAACCAAU	5	134.127	3	0.104587	Output/S24h/cleaveLand_result/t_plot/PC-3p-119396_62_XM_016077837.2_485_TPlot.pdf	3	90.843	3	0.0918986	Output/S0h/cleaveLand_result/t_plot/PC-3p-119396_62_XM_016077837.2_485_TPlot.pdf	134.127	90.843	0.562156	up	0.003902	0.00429712	yes	GO:0036094(small molecule binding);GO:0005515(protein binding);GO:0005488(binding);GO:0006457(protein folding);GO:0032553(ribonucleotide binding);GO:0043168(anion binding);GO:0032559(adenyl ribonucleotide binding);GO:0006950(response to stress);GO:0043167(ion binding);GO:0000166(nucleotide binding);GO:0009987(cellular process);GO:0017076(purine nucleotide binding);GO:0097159(organic cyclic compou…	ko04141(Protein processing in endoplasmic reticulum);ko04626(Plant-pathogen interaction)
PC-3p-119396_62	XM_016079227.2	247	271	262	-37.9	-25	0.659631	10.5	4-6,268-266;8-16,264-256;18-23,253-248	1-3,271-269[UP5];7-7,265-265[SIL];17-17,255-254[AILt];24-24,247-247[UP3]	.((((((..(((((((((.(((...&...))).)))))))))-.)))))).	UUUGGUUGUGGUUUGGUUGGGAGAA&AAAUCCGAACCAAACU-GAACCAAU	2	53.6509	3	0.329142	Output/S24h/cleaveLand_result/t_plot/PC-3p-119396_62_XM_016079227.2_262_TPlot.pdf	1	30.281	4	0.971426	Output/S0h/cleaveLand_result/t_plot/PC-3p-119396_62_XM_016079227.2_262_TPlot.pdf	53.6509	30.281	0.82519	up	0.010743	0.0115483	yes	GO:0005623(cell);GO:0065007(biological regulation);GO:0050789(regulation of biological process);GO:0009987(cellular process);GO:0065008(regulation of biological quality);GO:0050794(regulation of cellular process);GO:0042592(homeostatic process);GO:0019725(cellular homeostasis);GO:0045454(cell redox homeostasis)	NA
PC-3p-119396_62	XM_016107953.2	999	1024	1015	-37.9	-26.9	0.709763	7.5	1-3,1024-1022;5-13,1020-1012;14-21,1009-1002	4-4,1021-1021[SIL];x-x,1011-1010[BULt];22-24,1001-999[UP3]	...((((((((..(((((((((.(((&))).)))))))))--))))))))...	GUAGGUUCGGUAAUUGGUUCGGUUUU&AAAUCCGAACCAA--ACUGAACCAAU	0	0	NA	NA	NA	1	30.281	4	0.67307	Output/S0h/cleaveLand_result/t_plot/PC-3p-119396_62_XM_016107953.2_1015_TPlot.pdf	0	30.281	-Inf	down	3.7368e-08	6.97196e-08	yes	GO:0031224(intrinsic component of membrane);GO:0016020(membrane);GO:0044425(membrane part);GO:0016021(integral component of membrane)	NA
PC-3p-119396_62	XM_016110937.2	1096	1120	1111	-37.9	-25.1	0.662269	10.5	3-12,1118-1109;13-17,1107-1103;19-21,1101-1099	1-2,1120-1119[UP5];x-x,1108-1108[BULt];18-18,1102-1102[SIL];22-24,1098-1096[UP3]	...(((.(((((.((((((((((..&..))))))))))-))))).)))...	AUAGGUCCGGUUCUGGUUCGGGUCG&AAAUCCGAACCA-AACUGAACCAAU	4	107.302	2	0.712589	Output/S24h/cleaveLand_result/t_plot/PC-3p-119396_62_XM_016110937.2_1111_TPlot.pdf	0	0	NA	NA	NA	107.302	0	Inf	up	3.8116e-25	8.17156e-24	yes	GO:0005488(binding);GO:0046872(metal ion binding);GO:0043167(ion binding);GO:0043169(cation binding)	NA
PC-3p-120365_61	XM_016101238.2	1467	1489	1481	-34.5	-23.5	0.681159	7.5	2-7,1488-1483;10-23,1481-1468	1-1,1489-1489[UP5];8-9,1482-1482[AILq];24-24,1467-1467[UP3]	.((((((((((((((.-((((((.&.))))))..)))))))))))))).	AGUGUGUUGAUUCUUC-UUCAUUG&AAAUGAACUGAGAAUUAACACACA	1	26.8255	4	0.261576	Output/S24h/cleaveLand_result/t_plot/PC-3p-120365_61_XM_016101238.2_1481_TPlot.pdf	0	0	NA	NA	NA	26.8255	0	Inf	up	2.2264e-07	2.56268e-07	yes	NA	ko04120(Ubiquitin mediated proteolysis)
PC-3p-120365_61	XM_016105009.2	1028	1050	1041	-34.5	-22.7	0.657971	11.5	5-10,1046-1041;12-22,1040-1030	1-4,1050-1047[UP5];11-11,x-x[BULq];23-24,1029-1028[UP3]	..(((((((((((-((((((....&....)))))).)))))))))))..	AUUGUGUUGAUUC-CAGUUCUUCC&AAAUGAACUGAGAAUUAACACACA	0	0	NA	NA	NA	1	30.281	4	0.542787	Output/S0h/cleaveLand_result/t_plot/PC-3p-120365_61_XM_016105009.2_1041_TPlot.pdf	0	30.281	-Inf	down	3.7368e-08	6.97196e-08	yes	GO:0044267(cellular protein metabolic process);GO:1901564(organonitrogen compound metabolic process);GO:2000112(regulation of cellular macromolecule biosynthetic process);GO:0019538(protein metabolic process);GO:0050896(response to stimulus);GO:0043412(macromolecule modification);GO:0035556(intracellular signal transduction);GO:0016310(phosphorylation);GO:0044444(cytoplasmic part);GO:0003824(cata…	ko04075(Plant hormone signal transduction);ko04016(MAPK signaling pathway - plant)
PC-3p-120365_61	XM_021131032.1	1345	1368	1359	-34.5	-25.7	0.744928	9	5-14,1364-1355;16-24,1353-1345	1-4,1368-1365[UP5];15-15,1354-1354[SIL]	(((((((((.((((((((((....&....)))))))))).)))))))))	UGUGUGUUAUUUUUCAGUUCCUCU&AAAUGAACUGAGAAUUAACACACA	0	0	NA	NA	NA	1	30.281	4	0.125551	Output/S0h/cleaveLand_result/t_plot/PC-3p-120365_61_XM_021131032.1_1359_TPlot.pdf	0	30.281	-Inf	down	3.7368e-08	6.97196e-08	yes	GO:0006725(cellular aromatic compound metabolic process);GO:0016788(hydrolase activity, acting on ester bonds);GO:0006807(nitrogen compound metabolic process);GO:0046483(heterocycle metabolic process);GO:0090305(nucleic acid phosphodiester bond hydrolysis);GO:0008152(metabolic process);GO:0003824(catalytic activity);GO:0016787(hydrolase activity);GO:0009987(cellular process);GO:0044237(cellular m…	ko03018(RNA degradation)
PC-3p-121413_60	BGI_novel_T001060	679	698	689	-32.3	-24.8	0.767802	3.5	1-19,698-680	20-20,679-679[UP3]	.(((((((((((((((((((&))))))))))))))))))).	CAGUUUUCUUUGUGUGAAAA&UUUUCACACGGAGAAGACUA	1	26.8255	4	0.332567	Output/S24h/cleaveLand_result/t_plot/PC-3p-121413_60_BGI_novel_T001060_689_TPlot.pdf	1	30.281	4	0.300761	Output/S0h/cleaveLand_result/t_plot/PC-3p-121413_60_BGI_novel_T001060_689_TPlot.pdf	26.8255	30.281	-0.17481	down	0.64747	0.647871	yes	GO:0006952(defense response);GO:0006950(response to stress);GO:0050896(response to stimulus);GO:0009607(response to biotic stimulus)	NA
PC-3p-121413_60	BGI_novel_T001061	711	730	721	-32.3	-24.8	0.767802	3.5	1-19,730-712	20-20,711-711[UP3]	.(((((((((((((((((((&))))))))))))))))))).	CAGUUUUCUUUGUGUGAAAA&UUUUCACACGGAGAAGACUA	1	26.8255	4	0.261576	Output/S24h/cleaveLand_result/t_plot/PC-3p-121413_60_BGI_novel_T001061_721_TPlot.pdf	0	0	NA	NA	NA	26.8255	0	Inf	up	2.2264e-07	2.56268e-07	yes	GO:0006952(defense response);GO:0006950(response to stress);GO:0050896(response to stimulus);GO:0009607(response to biotic stimulus)	NA
PC-3p-121413_60	BGI_novel_T001062	596	615	606	-32.3	-24.8	0.767802	3.5	1-19,615-597	20-20,596-596[UP3]	.(((((((((((((((((((&))))))))))))))))))).	CAGUUUUCUUUGUGUGAAAA&UUUUCACACGGAGAAGACUA	1	26.8255	4	0.297969	Output/S24h/cleaveLand_result/t_plot/PC-3p-121413_60_BGI_novel_T001062_606_TPlot.pdf	0	0	NA	NA	NA	26.8255	0	Inf	up	2.2264e-07	2.56268e-07	yes	GO:0006952(defense response);GO:0006950(response to stress);GO:0050896(response to stimulus);GO:0009607(response to biotic stimulus)	NA
PC-3p-121413_60	BGI_novel_T001065	596	615	606	-32.3	-24.8	0.767802	3.5	1-19,615-597	20-20,596-596[UP3]	.(((((((((((((((((((&))))))))))))))))))).	CAGUUUUCUUUGUGUGAAAA&UUUUCACACGGAGAAGACUA	0	0	NA	NA	NA	1	30.281	4	0.316222	Output/S0h/cleaveLand_result/t_plot/PC-3p-121413_60_BGI_novel_T001065_606_TPlot.pdf	0	30.281	-Inf	down	3.7368e-08	6.97196e-08	yes	GO:0050896(response to stimulus);GO:0009607(response to biotic stimulus);GO:0006952(defense response);GO:0006950(response to stress)	NA
PC-3p-121413_60	BGI_novel_T001067	603	622	613	-32.3	-24.8	0.767802	3.5	1-19,622-604	20-20,603-603[UP3]	.(((((((((((((((((((&))))))))))))))))))).	CAGUUUUCUUUGUGUGAAAA&UUUUCACACGGAGAAGACUA	2	53.6509	3	0.0369599	Output/S24h/cleaveLand_result/t_plot/PC-3p-121413_60_BGI_novel_T001067_613_TPlot.pdf	1	30.281	4	0.28495	Output/S0h/cleaveLand_result/t_plot/PC-3p-121413_60_BGI_novel_T001067_613_TPlot.pdf	53.6509	30.281	0.82519	up	0.010743	0.0115483	yes	GO:0050896(response to stimulus);GO:0009607(response to biotic stimulus);GO:0006952(defense response);GO:0006950(response to stress)	NA
PC-3p-121413_60	BGI_novel_T007975	3638	3661	3648	-32.3	-21.78	0.674303	13.5	2-8,3660-3654;10-19,3648-3639	1-1,3661-3661[UP5];9-9,3653-3649[AILt];20-20,3638-3638[UP3]	.((((((((((.....(((((((.&.)))))))----.)))))))))).	GGGUCUUCUCCACCUAUGUGGAAU&UUUUCACA----CGGAGAAGACUA	1	26.8255	4	0.999527	Output/S24h/cleaveLand_result/t_plot/PC-3p-121413_60_BGI_novel_T007975_3648_TPlot.pdf	0	0	NA	NA	NA	26.8255	0	Inf	up	2.2264e-07	2.56268e-07	yes	GO:0018130(heterocycle biosynthetic process);GO:0016817(hydrolase activity, acting on acid anhydrides);GO:0044464(cell part);GO:0043227(membrane-bounded organelle);GO:0043226(organelle);GO:0032991(macromolecular complex);GO:0033554(cellular response to stress);GO:0097367(carbohydrate derivative binding);GO:0044260(cellular macromolecule metabolic process);GO:0071840(cellular component organizatio…	NA
PC-3p-121413_60	BGI_novel_T009438	697	718	708	-32.3	-22.6	0.69969	6.5	1-9,718-710;10-13,708-705;14-19,703-698	x-x,709-709[BULt];x-x,704-704[BULt];20-20,697-697[UP3]	.((((((.((((.(((((((((&)))))))))-))))-)))))).	CGGUCUUCCUCUGGUGUGAAGA&UUUUCACAC-GGAG-AAGACUA	1	26.8255	4	0.971648	Output/S24h/cleaveLand_result/t_plot/PC-3p-121413_60_BGI_novel_T009438_708_TPlot.pdf	0	0	NA	NA	NA	26.8255	0	Inf	up	2.2264e-07	2.56268e-07	yes	GO:0008152(metabolic process);GO:0044444(cytoplasmic part);GO:0044237(cellular metabolic process);GO:0044434(chloroplast part);GO:0019438(aromatic compound biosynthetic process);GO:0009987(cellular process);GO:0046483(heterocycle metabolic process);GO:0043231(intracellular membrane-bounded organelle);GO:0043167(ion binding);GO:0044422(organelle part);GO:0043094(cellular metabolic compound salvage…	ko01110(Biosynthesis of secondary metabolites);ko00630(Glyoxylate and dicarboxylate metabolism);ko01100(Metabolic pathways);ko00260(Glycine, serine and threonine metabolism);ko01200(Carbon metabolism);ko00561(Glycerolipid metabolism);ko00860(Porphyrin and chlorophyll metabolism)
PC-3p-121413_60	XM_016076477.2	184	204	195	-32.3	-21.9	0.678019	8	2-12,203-193;13-15,191-189;17-18,187-186	1-1,204-204[UP5];x-x,192-192[BULt];16-16,188-188[SIL];19-20,185-184[UP3]	..((.(((.(((((((((((.&.)))))))))))-))).))..	UUGUGUUCUUCCGUGUGGAGC&UUUUCACACGGA-GAAGACUA	2	53.6509	3	0.464824	Output/S24h/cleaveLand_result/t_plot/PC-3p-121413_60_XM_016076477.2_195_TPlot.pdf	0	0	NA	NA	NA	53.6509	0	Inf	up	2.3929e-13	9.82167e-13	yes	NA	NA
PC-3p-121413_60	XM_016080261.2	1867	1886	1877	-32.3	-22.9	0.708978	10	5-13,1882-1874;16-19,1871-1868	1-4,1886-1883[UP5];14-15,1873-1872[SIL];20-20,1867-1867[UP3]	.((((..(((((((((....&....)))))))))..)))).	CAGUCGGCUCCGUGUGUCCU&UUUUCACACGGAGAAGACUA	3	80.4764	2	0.612602	Output/S24h/cleaveLand_result/t_plot/PC-3p-121413_60_XM_016080261.2_1877_TPlot.pdf	0	0	NA	NA	NA	80.4764	0	Inf	up	2.9371e-19	3.092e-18	yes	GO:0009987(cellular process);GO:0005623(cell);GO:1901265(nucleoside phosphate binding);GO:0016020(membrane);GO:0071944(cell periphery);GO:0016818(hydrolase activity, acting on acid anhydrides, in phosphorus-containing anhydrides);GO:0008568(microtubule-severing ATPase activity);GO:1901363(heterocyclic compound binding);GO:0016887(ATPase activity);GO:0032555(purine ribonucleotide binding);GO:00325…	ko04141(Protein processing in endoplasmic reticulum)
PC-3p-121413_60	XM_016080540.2	642	661	652	-32.3	-24.2	0.749226	5.5	2-8,660-654;10-20,652-642	1-1,661-661[UP5];9-9,653-653[SIL]	(((((((((((.(((((((.&.))))))).)))))))))))	UGGUCUUCUCUUUGUGGAAC&UUUUCACACGGAGAAGACUA	1	26.8255	4	0.554534	Output/S24h/cleaveLand_result/t_plot/PC-3p-121413_60_XM_016080540.2_652_TPlot.pdf	0	0	NA	NA	NA	26.8255	0	Inf	up	2.2264e-07	2.56268e-07	yes	GO:0016747(transferase activity, transferring acyl groups other than amino-acyl groups);GO:0016746(transferase activity, transferring acyl groups);GO:0003824(catalytic activity);GO:0016740(transferase activity)	ko00943(Isoflavonoid biosynthesis);ko00944(Flavone and flavonol biosynthesis);ko00330(Arginine and proline metabolism)
PC-3p-121413_60	XM_016081466.2	1219	1238	1229	-32.3	-22.3	0.690402	5	2-10,1237-1229;12-20,1227-1219	1-1,1238-1238[UP5];11-11,1228-1228[SIL]	(((((((((.(((((((((.&.))))))))).)))))))))	UGGUUUUCUACGUGUGGAAC&UUUUCACACGGAGAAGACUA	0	0	NA	NA	NA	3	90.843	2	0.769369	Output/S0h/cleaveLand_result/t_plot/PC-3p-121413_60_XM_016081466.2_1229_TPlot.pdf	0	90.843	-Inf	down	1.5521e-21	2.37866e-20	yes	GO:0004659(prenyltransferase activity);GO:0043227(membrane-bounded organelle);GO:0009507(chloroplast);GO:0005737(cytoplasm);GO:0043229(intracellular organelle);GO:0003824(catalytic activity);GO:0005623(cell);GO:0044424(intracellular part);GO:0044444(cytoplasmic part);GO:0016765(transferase activity, transferring alkyl or aryl (other than methyl) groups);GO:0009536(plastid);GO:0005622(intracellula…	ko01110(Biosynthesis of secondary metabolites);ko00130(Ubiquinone and other terpenoid-quinone biosynthesis);ko01100(Metabolic pathways)
PC-3p-121413_60	XM_016082338.2	247	265	256	-32.3	-21	0.650155	7.5	1-5,265-261;7-11,259-255;13-20,254-247	6-6,260-260[SIL];12-12,x-x[BULq]	((((((((-(((((.(((((&))))).))))).))))))))	UGGUCUUC-CUGUGGGGAGA&UUUUCACACGGAGAAGACUA	1	26.8255	4	0.999999	Output/S24h/cleaveLand_result/t_plot/PC-3p-121413_60_XM_016082338.2_256_TPlot.pdf	0	0	NA	NA	NA	26.8255	0	Inf	up	2.2264e-07	2.56268e-07	yes	NA	NA
PC-3p-121413_60	XM_016082339.2	642	660	651	-32.3	-21	0.650155	7.5	1-5,660-656;7-11,654-650;13-20,649-642	6-6,655-655[SIL];12-12,x-x[BULq]	((((((((-(((((.(((((&))))).))))).))))))))	UGGUCUUC-CUGUGGGGAGA&UUUUCACACGGAGAAGACUA	2	53.6509	2	0.987383	Output/S24h/cleaveLand_result/t_plot/PC-3p-121413_60_XM_016082339.2_651_TPlot.pdf	0	0	NA	NA	NA	53.6509	0	Inf	up	2.3929e-13	9.82167e-13	yes	NA	NA
PC-3p-121413_60	XM_016086460.1	1149	1170	1159	-32.3	-22	0.681115	8	2-6,1169-1165;7-8,1163-1162;9-19,1160-1150	1-1,1170-1170[UP5];x-x,1164-1164[BULt];x-x,1161-1161[BULt];20-20,1149-1149[UP3]	.(((((((((((.((.(((((.&.)))))-))-))))))))))).	GGGUUUUCUCCGAUGAUGAGAG&UUUUCA-CA-CGGAGAAGACUA	10	268.255	2	0.884677	Output/S24h/cleaveLand_result/t_plot/PC-3p-121413_60_XM_016086460.1_1159_TPlot.pdf	3	90.843	2	0.848831	Output/S0h/cleaveLand_result/t_plot/PC-3p-121413_60_XM_016086460.1_1159_TPlot.pdf	268.255	90.843	1.56216	up	7.7506e-21	1.16481e-19	yes	NA	NA
PC-3p-121413_60	XM_016091424.2	512	530	522	-32.3	-22.3	0.690402	6	2-5,529-526;7-17,525-515	1-1,530-530[UP5];6-6,x-x[BULq];18-20,514-512[UP3]	...(((((((((((-((((.&.)))).)))))))))))...	UACUCUUCUCCGUG-GAAAC&UUUUCACACGGAGAAGACUA	0	0	NA	NA	NA	1	30.281	4	0.987783	Output/S0h/cleaveLand_result/t_plot/PC-3p-121413_60_XM_016091424.2_522_TPlot.pdf	0	30.281	-Inf	down	3.7368e-08	6.97196e-08	yes	GO:0009987(cellular process);GO:0006807(nitrogen compound metabolic process);GO:0005488(binding);GO:0005623(cell);GO:0043412(macromolecule modification);GO:0044464(cell part);GO:0005737(cytoplasm);GO:0019538(protein metabolic process);GO:0005622(intracellular);GO:0044260(cellular macromolecule metabolic process);GO:0006464(cellular protein modification process);GO:0043170(macromolecule metabolic …	NA
PC-3p-121413_60	XM_016092686.2	78	97	88	-32.3	-21	0.650155	11	5-17,93-81	1-4,97-94[UP5];18-20,80-78[UP3]	...(((((((((((((....&....)))))))))))))...	UCUUCUUCUCUGUGUGCGUC&UUUUCACACGGAGAAGACUA	1	26.8255	4	0.999997	Output/S24h/cleaveLand_result/t_plot/PC-3p-121413_60_XM_016092686.2_88_TPlot.pdf	0	0	NA	NA	NA	26.8255	0	Inf	up	2.2264e-07	2.56268e-07	yes	NA	NA
PC-3p-121413_60	XM_016095001.2	653	672	663	-32.3	-21.7	0.671827	12	6-18,667-655	1-5,672-668[UP5];19-20,654-653[UP3]	..(((((((((((((.....&.....)))))))))))))..	CUGUCUUCUCUGUGUUCCUC&UUUUCACACGGAGAAGACUA	1	26.8255	4	0.999651	Output/S24h/cleaveLand_result/t_plot/PC-3p-121413_60_XM_016095001.2_663_TPlot.pdf	0	0	NA	NA	NA	26.8255	0	Inf	up	2.2264e-07	2.56268e-07	yes	GO:0016020(membrane);GO:0031224(intrinsic component of membrane);GO:0016021(integral component of membrane);GO:0044425(membrane part)	NA
PC-3p-121413_60	XM_016096782.2	659	678	669	-32.3	-22.3	0.690402	8	3-7,676-672;9-17,670-662	1-2,678-677[UP5];8-8,671-671[SIL];18-20,661-659[UP3]	...(((((((((.(((((..&..))))).)))))))))...	UGUUCUUCUCCGCGUGAACU&UUUUCACACGGAGAAGACUA	0	0	NA	NA	NA	1	30.281	4	0.987507	Output/S0h/cleaveLand_result/t_plot/PC-3p-121413_60_XM_016096782.2_669_TPlot.pdf	0	30.281	-Inf	down	3.7368e-08	6.97196e-08	yes	NA	NA
PC-3p-121413_60	XM_016096854.2	232	252	242	-32.3	-21.2	0.656347	7	1-6,252-247;7-14,245-238;16-18,236-234	x-x,246-246[BULt];15-15,237-237[SIL];19-20,233-232[UP3]	..(((.((((((((.((((((&))))))-)))))))).)))..	UUGUCCUCUCUGUGCUGAAGA&UUUUCA-CACGGAGAAGACUA	1	26.8255	4	0.999985	Output/S24h/cleaveLand_result/t_plot/PC-3p-121413_60_XM_016096854.2_242_TPlot.pdf	0	0	NA	NA	NA	26.8255	0	Inf	up	2.2264e-07	2.56268e-07	yes	GO:1901265(nucleoside phosphate binding);GO:0000166(nucleotide binding);GO:0003676(nucleic acid binding);GO:0097159(organic cyclic compound binding);GO:0005488(binding);GO:1901363(heterocyclic compound binding);GO:0046914(transition metal ion binding);GO:0043169(cation binding);GO:0046872(metal ion binding);GO:0043167(ion binding);GO:0008270(zinc ion binding);GO:0036094(small molecule binding);GO…	ko03018(RNA degradation)
PC-3p-121413_60	XM_016097602.2	799	819	809	-32.3	-21.6	0.668731	9	2-6,818-814;7-9,812-810;11-18,808-801	1-1,819-819[UP5];x-x,813-813[BULt];10-10,809-809[SIL];19-20,800-799[UP3]	..((((((((.(((.(((((.&.)))))-))).))))))))..	GCGUCUUCUCGGUGCUGAGGU&UUUUCA-CACGGAGAAGACUA	2	53.6509	2	0.951224	Output/S24h/cleaveLand_result/t_plot/PC-3p-121413_60_XM_016097602.2_809_TPlot.pdf	1	30.281	4	0.999543	Output/S0h/cleaveLand_result/t_plot/PC-3p-121413_60_XM_016097602.2_809_TPlot.pdf	53.6509	30.281	0.82519	up	0.010743	0.0115483	yes	GO:0044283(small molecule biosynthetic process);GO:0009308(amine metabolic process);GO:0046219(indolalkylamine biosynthetic process);GO:0046483(heterocycle metabolic process);GO:0016835(carbon-oxygen lyase activity);GO:0006568(tryptophan metabolic process);GO:0006725(cellular aromatic compound metabolic process);GO:0071704(organic substance metabolic process);GO:0046394(carboxylic acid biosynthet…	ko01100(Metabolic pathways);ko00260(Glycine, serine and threonine metabolism);ko01230(Biosynthesis of amino acids);ko01110(Biosynthesis of secondary metabolites);ko00400(Phenylalanine, tyrosine and tryptophan biosynthesis)
PC-3p-121413_60	XM_016101719.2	2431	2450	2441	-32.3	-24.5	0.758514	4.5	1-8,2450-2443;10-20,2441-2431	9-9,2442-2442[SIL]	(((((((((((.((((((((&)))))))).)))))))))))	UGGUUUUCUCCUUGUGAGAG&UUUUCACACGGAGAAGACUA	1	26.8255	4	0.507152	Output/S24h/cleaveLand_result/t_plot/PC-3p-121413_60_XM_016101719.2_2441_TPlot.pdf	2	60.562	2	0.193498	Output/S0h/cleaveLand_result/t_plot/PC-3p-121413_60_XM_016101719.2_2441_TPlot.pdf	26.8255	60.562	-1.17481	down	0.00030739	0.000341326	yes	GO:0003825(alpha,alpha-trehalose-phosphate synthase (UDP-forming) activity);GO:0016791(phosphatase activity);GO:0005984(disaccharide metabolic process);GO:0005975(carbohydrate metabolic process);GO:0034637(cellular carbohydrate biosynthetic process);GO:0016051(carbohydrate biosynthetic process);GO:0006796(phosphate-containing compound metabolic process);GO:0004805(trehalose-phosphatase activity);…	ko01100(Metabolic pathways);ko00500(Starch and sucrose metabolism)
PC-3p-121413_60	XM_016102109.2	1709	1733	1719	-32.3	-21.6	0.668731	17	3-9,1731-1725;10-18,1719-1711	1-2,1733-1732[UP5];x-x,1724-1720[BULt];19-20,1710-1709[UP3]	..(((((((((.....(((((((..&..)))))))-----)))))))))..	UUGUCUUCUCCACGGAGUGUGGGUU&UUUUCACAC-----GGAGAAGACUA	0	0	NA	NA	NA	1	30.281	4	0.999573	Output/S0h/cleaveLand_result/t_plot/PC-3p-121413_60_XM_016102109.2_1719_TPlot.pdf	0	30.281	-Inf	down	3.7368e-08	6.97196e-08	yes	GO:0016020(membrane)	NA
PC-3p-121413_60	XM_016103125.2	552	572	562	-32.3	-21.1	0.653251	11	4-7,569-566;9-20,563-552	1-3,572-570[UP5];8-8,565-564[AILt]	((((((((((((..((((...&...))))-.))))))))))))	UGGUUUUCUCCGCCGUGGCCU&UUUUCAC-ACGGAGAAGACUA	1	26.8255	4	0.999993	Output/S24h/cleaveLand_result/t_plot/PC-3p-121413_60_XM_016103125.2_562_TPlot.pdf	0	0	NA	NA	NA	26.8255	0	Inf	up	2.2264e-07	2.56268e-07	yes	GO:0016020(membrane);GO:0016021(integral component of membrane);GO:0044425(membrane part);GO:0031224(intrinsic component of membrane)	NA
PC-3p-121413_60	XM_016103671.2	756	775	766	-32.3	-21.5	0.665635	8	1-13,775-763	14-20,762-756[UP3]	.......(((((((((((((&))))))))))))).......	CAUGUGGCUCCGUGUGAGAA&UUUUCACACGGAGAAGACUA	1	26.8255	4	0.999932	Output/S24h/cleaveLand_result/t_plot/PC-3p-121413_60_XM_016103671.2_766_TPlot.pdf	0	0	NA	NA	NA	26.8255	0	Inf	up	2.2264e-07	2.56268e-07	yes	GO:0016757(transferase activity, transferring glycosyl groups);GO:0003824(catalytic activity);GO:0016740(transferase activity)	NA
PC-3p-121413_60	XM_016103675.2	711	730	721	-32.3	-21.5	0.665635	8	1-13,730-718	14-20,717-711[UP3]	.......(((((((((((((&))))))))))))).......	CAUGUGGCUCCGUGUGAGAA&UUUUCACACGGAGAAGACUA	0	0	NA	NA	NA	1	30.281	4	0.999809	Output/S0h/cleaveLand_result/t_plot/PC-3p-121413_60_XM_016103675.2_721_TPlot.pdf	0	30.281	-Inf	down	3.7368e-08	6.97196e-08	yes	GO:0016757(transferase activity, transferring glycosyl groups);GO:0003824(catalytic activity);GO:0016740(transferase activity)	NA
PC-3p-121413_60	XM_016104760.2	454	473	464	-32.3	-21.1	0.653251	7.5	1-10,473-464;12-17,462-457	11-11,463-463[SIL];18-20,456-454[UP3]	...((((((.((((((((((&)))))))))).))))))...	AUAUCUUCUGUGUGUGAAGG&UUUUCACACGGAGAAGACUA	1	26.8255	4	0.999993	Output/S24h/cleaveLand_result/t_plot/PC-3p-121413_60_XM_016104760.2_464_TPlot.pdf	1	30.281	4	0.999973	Output/S0h/cleaveLand_result/t_plot/PC-3p-121413_60_XM_016104760.2_464_TPlot.pdf	26.8255	30.281	-0.17481	down	0.64747	0.647871	yes	GO:0016829(lyase activity);GO:0003824(catalytic activity);GO:0004609(phosphatidylserine decarboxylase activity);GO:0016831(carboxy-lyase activity);GO:0016830(carbon-carbon lyase activity)	ko04144(Endocytosis)
PC-3p-121413_60	XM_016106971.2	416	436	427	-32.3	-22.4	0.693498	9	4-14,433-423;15-19,421-417	1-3,436-434[UP5];x-x,422-422[BULt];20-20,416-416[UP3]	.(((((.(((((((((((...&...)))))))))))-))))).	CGGUCUAUUUCCGUGUGGCAA&UUUUCACACGGAGA-AGACUA	1	26.8255	4	0.989147	Output/S24h/cleaveLand_result/t_plot/PC-3p-121413_60_XM_016106971.2_427_TPlot.pdf	0	0	NA	NA	NA	26.8255	0	Inf	up	2.2264e-07	2.56268e-07	yes	NA	ko04626(Plant-pathogen interaction)
PC-3p-121413_60	XM_016108187.2	3510	3530	3521	-32.3	-21.5	0.665635	8.5	4-11,3527-3520;12-16,3518-3514;18-20,3512-3510	1-3,3530-3528[UP5];x-x,3519-3519[BULt];17-17,3513-3513[SIL]	(((.(((((.((((((((...&...))))))))-))))).)))	UGGACUUCUGCCGUGUGAUGC&UUUUCACACGG-AGAAGACUA	1	26.8255	4	0.999929	Output/S24h/cleaveLand_result/t_plot/PC-3p-121413_60_XM_016108187.2_3521_TPlot.pdf	0	0	NA	NA	NA	26.8255	0	Inf	up	2.2264e-07	2.56268e-07	yes	NA	NA
PC-3p-121413_60	XM_016109773.2	1017	1034	1026	-32.3	-23.4	0.724458	5.5	1-7,1034-1028;9-11,1027-1025;13-20,1024-1017	8-8,x-x[BULq];12-12,x-x[BULq]	((((((((-(((-(((((((&))))))).))).))))))))	UGGUCUUC-CCG-GUGAGAA&UUUUCACACGGAGAAGACUA	2	53.6509	2	0.534159	Output/S24h/cleaveLand_result/t_plot/PC-3p-121413_60_XM_016109773.2_1026_TPlot.pdf	0	0	NA	NA	NA	53.6509	0	Inf	up	2.3929e-13	9.82167e-13	yes	GO:0016020(membrane)	NA
PC-3p-121413_60	XM_016110631.2	837	858	847	-32.3	-21.1	0.653251	10	3-9,856-850;10-17,847-840	1-2,858-857[UP5];x-x,849-848[BULt];18-20,839-837[UP3]	...((((((((..(((((((..&..)))))))--))))))))...	UCUUCUUCUCCAUGUGUGAAUG&UUUUCACAC--GGAGAAGACUA	1	26.8255	4	0.999993	Output/S24h/cleaveLand_result/t_plot/PC-3p-121413_60_XM_016110631.2_847_TPlot.pdf	0	0	NA	NA	NA	26.8255	0	Inf	up	2.2264e-07	2.56268e-07	yes	GO:0016787(hydrolase activity);GO:0003824(catalytic activity);GO:0005975(carbohydrate metabolic process);GO:0052692(raffinose alpha-galactosidase activity);GO:0071704(organic substance metabolic process);GO:0004557(alpha-galactosidase activity);GO:0015925(galactosidase activity);GO:0044238(primary metabolic process);GO:0004553(hydrolase activity, hydrolyzing O-glycosyl compounds);GO:0016798(hydro…	ko00600(Sphingolipid metabolism);ko01100(Metabolic pathways);ko00052(Galactose metabolism);ko00603(Glycosphingolipid biosynthesis - globo and isoglobo series);ko00561(Glycerolipid metabolism)
PC-3p-121413_60	XM_016111080.2	123	142	133	-32.3	-21	0.650155	11	5-17,138-126	1-4,142-139[UP5];18-20,125-123[UP3]	...(((((((((((((....&....)))))))))))))...	UCUUCUUCUCUGUGUGCGUC&UUUUCACACGGAGAAGACUA	1	26.8255	4	0.999999	Output/S24h/cleaveLand_result/t_plot/PC-3p-121413_60_XM_016111080.2_133_TPlot.pdf	0	0	NA	NA	NA	26.8255	0	Inf	up	2.2264e-07	2.56268e-07	yes	NA	NA
PC-3p-121413_60	XM_016114480.2	287	305	297	-32.3	-21.7	0.671827	5	1-8,305-298;10-20,297-287	9-9,x-x[BULq]	(((((((((((-((((((((&)))))))).)))))))))))	UGGUUUUCUUC-UGUGAAGA&UUUUCACACGGAGAAGACUA	0	0	NA	NA	NA	1	30.281	4	0.999466	Output/S0h/cleaveLand_result/t_plot/PC-3p-121413_60_XM_016114480.2_297_TPlot.pdf	0	30.281	-Inf	down	3.7368e-08	6.97196e-08	yes	NA	ko03015(mRNA surveillance pathway)
PC-3p-121413_60	XM_016114481.2	287	305	297	-32.3	-21.7	0.671827	5	1-8,305-298;10-20,297-287	9-9,x-x[BULq]	(((((((((((-((((((((&)))))))).)))))))))))	UGGUUUUCUUC-UGUGAAGA&UUUUCACACGGAGAAGACUA	0	0	NA	NA	NA	1	30.281	4	0.999202	Output/S0h/cleaveLand_result/t_plot/PC-3p-121413_60_XM_016114481.2_297_TPlot.pdf	0	30.281	-Inf	down	3.7368e-08	6.97196e-08	yes	NA	ko03015(mRNA surveillance pathway)
PC-3p-121413_60	XM_021124575.1	74	92	84	-32.3	-21.7	0.671827	5	1-8,92-85;10-20,84-74	9-9,x-x[BULq]	(((((((((((-((((((((&)))))))).)))))))))))	UGGUUUUCUUC-UGUGAAGA&UUUUCACACGGAGAAGACUA	0	0	NA	NA	NA	1	30.281	4	0.999219	Output/S0h/cleaveLand_result/t_plot/PC-3p-121413_60_XM_021124575.1_84_TPlot.pdf	0	30.281	-Inf	down	3.7368e-08	6.97196e-08	yes	NA	ko03015(mRNA surveillance pathway)
PC-3p-121413_60	XM_021124576.1	74	92	84	-32.3	-21.7	0.671827	5	1-8,92-85;10-20,84-74	9-9,x-x[BULq]	(((((((((((-((((((((&)))))))).)))))))))))	UGGUUUUCUUC-UGUGAAGA&UUUUCACACGGAGAAGACUA	1	26.8255	4	0.999623	Output/S24h/cleaveLand_result/t_plot/PC-3p-121413_60_XM_021124576.1_84_TPlot.pdf	0	0	NA	NA	NA	26.8255	0	Inf	up	2.2264e-07	2.56268e-07	yes	NA	ko03015(mRNA surveillance pathway)
PC-3p-121413_60	XM_021131237.1	966	984	976	-32.3	-21.7	0.671827	7	1-7,984-978;9-16,977-970	8-8,x-x[BULq];17-20,969-966[UP3]	....((((((((-(((((((&))))))).))))))))....	UCCACUUCUCCG-GUGAGAA&UUUUCACACGGAGAAGACUA	1	26.8255	4	0.999755	Output/S24h/cleaveLand_result/t_plot/PC-3p-121413_60_XM_021131237.1_976_TPlot.pdf	0	0	NA	NA	NA	26.8255	0	Inf	up	2.2264e-07	2.56268e-07	yes	NA	ko03010(Ribosome)
PC-3p-121413_60	XM_021139045.1	1877	1897	1887	-32.3	-21.3	0.659443	6.5	3-9,1895-1889;10-15,1887-1882;17-20,1880-1877	1-2,1897-1896[UP5];x-x,1888-1888[BULt];16-16,1881-1881[SIL]	((((.((((((.(((((((..&..)))))))-)))))).))))	UGGUAUUCUCCGGUGUGAAUC&UUUUCACAC-GGAGAAGACUA	1	26.8255	4	0.999973	Output/S24h/cleaveLand_result/t_plot/PC-3p-121413_60_XM_021139045.1_1887_TPlot.pdf	0	0	NA	NA	NA	26.8255	0	Inf	up	2.2264e-07	2.56268e-07	yes	NA	NA
PC-3p-121413_60	XM_021139422.1	1215	1234	1225	-32.3	-21	0.650155	6	1-6,1234-1229;8-14,1227-1221;16-18,1219-1217	7-7,1228-1228[SIL];15-15,1220-1220[SIL];19-20,1216-1215[UP3]	..(((.(((((((.((((((&)))))).))))))).)))..	UUGUCAUCUCCGUUUGAAGA&UUUUCACACGGAGAAGACUA	1	26.8255	4	0.999996	Output/S24h/cleaveLand_result/t_plot/PC-3p-121413_60_XM_021139422.1_1225_TPlot.pdf	0	0	NA	NA	NA	26.8255	0	Inf	up	2.2264e-07	2.56268e-07	yes	GO:0046983(protein dimerization activity);GO:0005488(binding);GO:0005515(protein binding)	NA
PC-3p-121413_60	XM_021143411.1	1910	1929	1920	-32.3	-21.8	0.674923	8.5	4-14,1926-1916;16-19,1914-1911	1-3,1929-1927[UP5];15-15,1915-1915[SIL];20-20,1910-1910[UP3]	.((((.(((((((((((...&...))))))))))).)))).	GAGUUGUCUCUGUGUGACCU&UUUUCACACGGAGAAGACUA	0	0	NA	NA	NA	1	30.281	4	0.997612	Output/S0h/cleaveLand_result/t_plot/PC-3p-121413_60_XM_021143411.1_1920_TPlot.pdf	0	30.281	-Inf	down	3.7368e-08	6.97196e-08	yes	NA	NA
PC-3p-122043_60	XM_016117321.2	351	374	365	-37.3	-24.3	0.651475	11	5-15,370-360;17-23,358-352	1-4,374-371[UP5];16-16,359-359[SIL];24-24,351-351[UP3]	.(((((((.(((((((((((....&....))))))))))).))))))).	UUAUGUGUUUGUUCCGGUUCAAGA&AUAGGAACUGGAACGUACAUAUAU	0	0	NA	NA	NA	2	60.562	2	0.369233	Output/S0h/cleaveLand_result/t_plot/PC-3p-122043_60_XM_016117321.2_365_TPlot.pdf	0	60.562	-Inf	down	7.123e-15	4.42666e-14	yes	GO:0003824(catalytic activity)	ko00052(Galactose metabolism)
PC-3p-122043_60	XM_021126385.1	182	205	196	-37.3	-26.3	0.705094	8	2-15,204-191;18-20,188-186	1-1,205-205[UP5];16-17,190-189[SIL];21-24,185-182[UP3]	....(((..((((((((((((((.&.))))))))))))))..)))....	UGUGGUGGUUGUUCCAGUUCCUAC&AUAGGAACUGGAACGUACAUAUAU	0	0	NA	NA	NA	1	30.281	4	0.511065	Output/S0h/cleaveLand_result/t_plot/PC-3p-122043_60_XM_021126385.1_196_TPlot.pdf	0	30.281	-Inf	down	3.7368e-08	6.97196e-08	yes	NA	NA
PC-3p-122748_59	BGI_novel_T007568	816	840	831	-43.4	-28.7	0.66129	8.5	2-11,839-830;12-16,828-824;19-23,821-817	1-1,840-840[UP5];x-x,829-829[BULt];17-18,823-822[SIL];24-24,816-816[UP3]	.(((((..(((((.((((((((((.&.))))))))))-)))))..))))).	UGGGAUGAAGGUGAUAGUGGACUUG&AAAGUCCACUG-CACCUGAGUUUCU	1	26.8255	4	0.990906	Output/S24h/cleaveLand_result/t_plot/PC-3p-122748_59_BGI_novel_T007568_831_TPlot.pdf	0	0	NA	NA	NA	26.8255	0	Inf	up	2.2264e-07	2.56268e-07	yes	GO:0044877(macromolecular complex binding);GO:0004338(glucan exo-1,3-beta-glucosidase activity);GO:0007010(cytoskeleton organization);GO:0030029(actin filament-based process);GO:0005488(binding);GO:0006996(organelle organization);GO:0030036(actin cytoskeleton organization);GO:0032403(protein complex binding);GO:0008152(metabolic process);GO:0016798(hydrolase activity, acting on glycosyl bonds);GO…	ko04626(Plant-pathogen interaction);ko00500(Starch and sucrose metabolism);ko04016(MAPK signaling pathway - plant)
PC-3p-122748_59	XM_016076238.2	1533	1558	1549	-43.4	-28.5	0.656682	8	3-12,1556-1547;15-18,1544-1541;19-22,1539-1536;23-24,1534-1533	1-2,1558-1557[UP5];13-14,1546-1545[SIL];x-x,1540-1540[BULt];x-x,1535-1535[BULt]	((.((((.((((..((((((((((..&..))))))))))..))))-))))-))	AGAAAACAUCAGAGGCAGUGGGCUAU&AAAGUCCACUGCACCUGA-GUUU-CU	1	26.8255	4	0.994514	Output/S24h/cleaveLand_result/t_plot/PC-3p-122748_59_XM_016076238.2_1549_TPlot.pdf	0	0	NA	NA	NA	26.8255	0	Inf	up	2.2264e-07	2.56268e-07	yes	GO:1901360(organic cyclic compound metabolic process);GO:0006520(cellular amino acid metabolic process);GO:0044238(primary metabolic process);GO:0046483(heterocycle metabolic process);GO:0043170(macromolecule metabolic process);GO:0034641(cellular nitrogen compound metabolic process);GO:0043043(peptide biosynthetic process);GO:0032559(adenyl ribonucleotide binding);GO:0035639(purine ribonucleosid…	ko00970(Aminoacyl-tRNA biosynthesis)
PC-3p-122748_59	XM_016084748.2	2350	2373	2364	-43.4	-28.8	0.663594	8.5	4-13,2370-2361;15-17,2358-2356;19-24,2355-2350	1-3,2373-2371[UP5];14-14,2360-2359[AILt];18-18,x-x[BULq]	((((((-(((..((((((((((...&...))))))))))-.))).))))))	AGAGAC-CAGCAUGCAGUGGACAUC&AAAGUCCACUGCA-CCUGAGUUUCU	0	0	NA	NA	NA	1	30.281	4	0.980462	Output/S0h/cleaveLand_result/t_plot/PC-3p-122748_59_XM_016084748.2_2364_TPlot.pdf	0	30.281	-Inf	down	3.7368e-08	6.97196e-08	yes	GO:0043169(cation binding);GO:0005488(binding);GO:0046914(transition metal ion binding);GO:0046872(metal ion binding);GO:0008270(zinc ion binding);GO:0043167(ion binding)	NA
PC-3p-122748_59	XM_016084749.2	2359	2382	2373	-43.4	-28.8	0.663594	8.5	4-13,2379-2370;15-17,2367-2365;19-24,2364-2359	1-3,2382-2380[UP5];14-14,2369-2368[AILt];18-18,x-x[BULq]	((((((-(((..((((((((((...&...))))))))))-.))).))))))	AGAGAC-CAGCAUGCAGUGGACAUC&AAAGUCCACUGCA-CCUGAGUUUCU	0	0	NA	NA	NA	1	30.281	4	0.981316	Output/S0h/cleaveLand_result/t_plot/PC-3p-122748_59_XM_016084749.2_2373_TPlot.pdf	0	30.281	-Inf	down	3.7368e-08	6.97196e-08	yes	GO:0043169(cation binding);GO:0005488(binding);GO:0046914(transition metal ion binding);GO:0046872(metal ion binding);GO:0008270(zinc ion binding);GO:0043167(ion binding)	NA
PC-3p-122748_59	XM_016085420.2	287	311	302	-43.4	-28.42	0.654839	10	3-11,309-301;15-24,296-287	1-2,311-310[UP5];12-14,300-297[AILt]	((((((((((....(((((((((..&..)))))))))-...))))))))))	GGGAACUCAGUACUCAGUGGACUCU&AAAGUCCACUG-CACCUGAGUUUCU	1	26.8255	4	0.994915	Output/S24h/cleaveLand_result/t_plot/PC-3p-122748_59_XM_016085420.2_302_TPlot.pdf	0	0	NA	NA	NA	26.8255	0	Inf	up	2.2264e-07	2.56268e-07	yes	GO:0016791(phosphatase activity);GO:0006793(phosphorus metabolic process);GO:0042578(phosphoric ester hydrolase activity);GO:0009987(cellular process);GO:0006796(phosphate-containing compound metabolic process);GO:0016311(dephosphorylation);GO:0003993(acid phosphatase activity);GO:0016787(hydrolase activity);GO:0008152(metabolic process);GO:0016788(hydrolase activity, acting on ester bonds);GO:00…	ko03010(Ribosome);ko04016(MAPK signaling pathway - plant)
PC-3p-122748_59	XM_016085708.2	1565	1591	1580	-43.4	-29	0.668203	11.5	3-3,1589-1589;5-8,1587-1584;9-13,1581-1577;14-23,1575-1566	1-2,1591-1590[UP5];4-4,1588-1588[SIL];x-x,1583-1582[BULt];x-x,1576-1576[BULt];24-24,1565-1565[UP3]	.((((((((((.(((((..((((.(..&..).))))--)))))-)))))))))).	UGAAGCUCAGGAUGCAGCAUGGAGUCC&AAAGUCCA--CUGCA-CCUGAGUUUCU	1	26.8255	4	0.984926	Output/S24h/cleaveLand_result/t_plot/PC-3p-122748_59_XM_016085708.2_1580_TPlot.pdf	1	30.281	4	0.975566	Output/S0h/cleaveLand_result/t_plot/PC-3p-122748_59_XM_016085708.2_1580_TPlot.pdf	26.8255	30.281	-0.17481	down	0.64747	0.647871	yes	GO:0044260(cellular macromolecule metabolic process);GO:0006468(protein phosphorylation);GO:0051716(cellular response to stimulus);GO:0006796(phosphate-containing compound metabolic process);GO:0006464(cellular protein modification process);GO:0016310(phosphorylation);GO:0007154(cell communication);GO:0035639(purine ribonucleoside triphosphate binding);GO:0016772(transferase activity, transferrin…	NA
PC-3p-122748_59	XM_016090370.2	476	498	489	-43.4	-31.32	0.721659	5.5	2-15,497-484;20-24,480-476	1-1,498-498[UP5];16-19,483-481[AILq]	(((((...-((((((((((((((.&.))))))))))))))....)))))	AGAGAAAU-GGUGCAGUGGACUUA&AAAGUCCACUGCACCUGAGUUUCU	0	0	NA	NA	NA	1	30.281	4	0.642481	Output/S0h/cleaveLand_result/t_plot/PC-3p-122748_59_XM_016090370.2_489_TPlot.pdf	0	30.281	-Inf	down	3.7368e-08	6.97196e-08	yes	GO:1905368(peptidase complex);GO:0005623(cell);GO:0000502(proteasome complex);GO:0005622(intracellular);GO:0044464(cell part);GO:0043234(protein complex);GO:1902494(catalytic complex);GO:1905369(endopeptidase complex);GO:0044424(intracellular part);GO:0032991(macromolecular complex)	ko03050(Proteasome)
PC-3p-122748_59	XM_016102051.2	1421	1446	1436	-43.4	-29.02	0.668664	11.5	1-7,1446-1440;11-16,1435-1430;17-24,1428-1421	8-10,1439-1436[AILt];x-x,1429-1429[BULt]	((((((((.((((((....(((((((&)))))))-...))))))-))))))))	GGGAGCUCGAGGUGCUUCAGGGCUUU&AAAGUCC-ACUGCACCU-GAGUUUCU	2	53.6509	3	0.312086	Output/S24h/cleaveLand_result/t_plot/PC-3p-122748_59_XM_016102051.2_1436_TPlot.pdf	0	0	NA	NA	NA	53.6509	0	Inf	up	2.3929e-13	9.82167e-13	yes	NA	NA
PC-3p-122748_59	XM_016109888.2	1863	1885	1876	-43.4	-28.3	0.652074	11.5	4-12,1882-1874;14-16,1873-1871;18-23,1869-1864	1-3,1885-1883[UP5];13-13,x-x[BULq];17-17,1870-1870[SIL];24-24,1863-1863[UP3]	.((((((.(((-(((((((((...&...))))))))).))).)))))).	CGGGGCUGAGG-GCGGUGGAUGCA&AAAGUCCACUGCACCUGAGUUUCU	2	53.6509	2	0.870733	Output/S24h/cleaveLand_result/t_plot/PC-3p-122748_59_XM_016109888.2_1876_TPlot.pdf	0	0	NA	NA	NA	53.6509	0	Inf	up	2.3929e-13	9.82167e-13	yes	GO:0008152(metabolic process);GO:0035639(purine ribonucleoside triphosphate binding);GO:0036211(protein modification process);GO:0036094(small molecule binding);GO:1901564(organonitrogen compound metabolic process);GO:0016773(phosphotransferase activity, alcohol group as acceptor);GO:0032553(ribonucleotide binding);GO:0006464(cellular protein modification process);GO:1901265(nucleoside phosphate …	NA
PC-3p-122748_59	XM_016112989.2	811	834	825	-43.4	-30.6	0.705069	11	4-7,831-828;9-15,826-820;17-24,818-811	1-3,834-832[UP5];8-8,827-827[SIL];16-16,819-819[SIL]	((((((((.(((((((.((((...&...)))).))))))).))))))))	AGAGGCUCCGGUGCGGAGGGCAGG&AAAGUCCACUGCACCUGAGUUUCU	0	0	NA	NA	NA	2	60.562	2	0.491285	Output/S0h/cleaveLand_result/t_plot/PC-3p-122748_59_XM_016112989.2_825_TPlot.pdf	0	60.562	-Inf	down	7.123e-15	4.42666e-14	yes	GO:0016020(membrane)	NA
PC-3p-122748_59	XM_021129802.1	1153	1176	1167	-43.4	-30.7	0.707373	4	1-13,1176-1164;15-17,1161-1159;19-24,1158-1153	14-14,1163-1162[AILt];18-18,x-x[BULq]	((((((-(((..(((((((((((((&)))))))))))))-.))).))))))	AGGAGC-CAGAAUGCAGUGGACUUU&AAAGUCCACUGCA-CCUGAGUUUCU	1	26.8255	4	0.837881	Output/S24h/cleaveLand_result/t_plot/PC-3p-122748_59_XM_021129802.1_1167_TPlot.pdf	0	0	NA	NA	NA	26.8255	0	Inf	up	2.2264e-07	2.56268e-07	yes	GO:0006807(nitrogen compound metabolic process);GO:0003824(catalytic activity);GO:0005488(binding);GO:0043167(ion binding);GO:0006796(phosphate-containing compound metabolic process);GO:0009987(cellular process);GO:0036211(protein modification process);GO:1901564(organonitrogen compound metabolic process);GO:0042578(phosphoric ester hydrolase activity);GO:0006470(protein dephosphorylation);GO:004…	NA
PC-3p-122748_59	XM_021131017.1	1561	1587	1576	-43.4	-29	0.668203	11.5	3-3,1585-1585;5-8,1583-1580;9-13,1577-1573;14-23,1571-1562	1-2,1587-1586[UP5];4-4,1584-1584[SIL];x-x,1579-1578[BULt];x-x,1572-1572[BULt];24-24,1561-1561[UP3]	.((((((((((.(((((..((((.(..&..).))))--)))))-)))))))))).	UGAAGCUCAGGAUGCAGCAUGGAGUCC&AAAGUCCA--CUGCA-CCUGAGUUUCU	0	0	NA	NA	NA	1	30.281	4	0.97078	Output/S0h/cleaveLand_result/t_plot/PC-3p-122748_59_XM_021131017.1_1576_TPlot.pdf	0	30.281	-Inf	down	3.7368e-08	6.97196e-08	yes	GO:0044260(cellular macromolecule metabolic process);GO:0006468(protein phosphorylation);GO:0051716(cellular response to stimulus);GO:0006796(phosphate-containing compound metabolic process);GO:0006464(cellular protein modification process);GO:0016310(phosphorylation);GO:0007154(cell communication);GO:0035639(purine ribonucleoside triphosphate binding);GO:0016772(transferase activity, transferrin…	NA
PC-3p-12333_982	BGI_novel_T001906	1420	1444	1435	-42.7	-31.9	0.747073	7	1-9,1444-1436;12-16,1433-1429;18-24,1426-1420	10-11,1435-1434[SIL];17-17,1428-1427[AILt]	(((((((..(((((..(((((((((&)))))))))..)))))-.)))))))	CCAGCAGGAUGGUAUUGCCCAACAA&UUGUUGGGCUUUAUCA-GUUGCUGG	2	53.6509	1	0.0114016	Output/S24h/cleaveLand_result/t_plot/PC-3p-12333_982_BGI_novel_T001906_1435_TPlot.pdf	0	0	NA	NA	NA	53.6509	0	Inf	up	2.3929e-13	9.82167e-13	yes	GO:0016887(ATPase activity);GO:0030554(adenyl nucleotide binding);GO:0005886(plasma membrane);GO:0016020(membrane);GO:0071944(cell periphery);GO:0016462(pyrophosphatase activity);GO:0044425(membrane part);GO:0016817(hydrolase activity, acting on acid anhydrides);GO:0043492(ATPase activity, coupled to movement of substances);GO:0005215(transporter activity);GO:0097159(organic cyclic compound bindi…	ko02010(ABC transporters)
PC-3p-12333_982	BGI_novel_T008368	494	517	508	-42.7	-28.3	0.662763	9	1-11,517-507;13-22,505-496	12-12,506-506[SIL];23-24,495-494[UP3]	..((((((((((.(((((((((((&))))))))))).))))))))))..	GAGGCAGCUGAUUGAGCUCAAUGA&UUGUUGGGCUUUAUCAGUUGCUGG	0	0	NA	NA	NA	2	60.562	2	0.968205	Output/S0h/cleaveLand_result/t_plot/PC-3p-12333_982_BGI_novel_T008368_508_TPlot.pdf	0	60.562	-Inf	down	7.123e-15	4.42666e-14	yes	GO:0034504(protein localization to nucleus);GO:0005215(transporter activity);GO:0033046(negative regulation of sister chromatid segregation);GO:0051170(nuclear import);GO:0051169(nuclear transport);GO:0071705(nitrogen compound transport);GO:0006886(intracellular protein transport);GO:0006810(transport);GO:0045786(negative regulation of cell cycle);GO:0007049(cell cycle);GO:0007094(mitotic spindle…	ko03013(RNA transport)
PC-3p-12333_982	BGI_novel_T009373	1027	1052	1043	-42.7	-27.8	0.651054	7	1-5,1052-1048;7-15,1046-1038;17-24,1034-1027	6-6,1047-1047[SIL];16-16,1037-1035[AILt]	((((((((...(((((((((.(((((&))))).)))))))))--.))))))))	CUAGCAACAAAGAUAAAGCUGAACAG&UUGUUGGGCUUUAUC--AGUUGCUGG	2	53.6509	2	0.992484	Output/S24h/cleaveLand_result/t_plot/PC-3p-12333_982_BGI_novel_T009373_1043_TPlot.pdf	0	0	NA	NA	NA	53.6509	0	Inf	up	2.3929e-13	9.82167e-13	yes	NA	ko00071(Fatty acid degradation);ko01100(Metabolic pathways);ko04146(Peroxisome);ko01212(Fatty acid metabolism);ko00061(Fatty acid biosynthesis)
PC-3p-12333_982	BGI_novel_T010672	3606	3628	3619	-42.7	-29.9	0.700234	7.5	1-11,3628-3618;13-24,3617-3606	12-12,x-x[BULq]	((((((((((((-(((((((((((&))))))))))).))))))))))))	CCGGCAACUGGU-AGGCCUAGUAG&UUGUUGGGCUUUAUCAGUUGCUGG	2	53.6509	2	0.756752	Output/S24h/cleaveLand_result/t_plot/PC-3p-12333_982_BGI_novel_T010672_3619_TPlot.pdf	1	30.281	4	0.972676	Output/S0h/cleaveLand_result/t_plot/PC-3p-12333_982_BGI_novel_T010672_3619_TPlot.pdf	53.6509	30.281	0.82519	up	0.010743	0.0115483	yes	GO:0005623(cell);GO:0060255(regulation of macromolecule metabolic process);GO:0019219(regulation of nucleobase-containing compound metabolic process);GO:0044260(cellular macromolecule metabolic process);GO:0050789(regulation of biological process);GO:0019538(protein metabolic process);GO:0005737(cytoplasm);GO:2000112(regulation of cellular macromolecule biosynthetic process);GO:0044444(cytoplasmi…	ko00480(Glutathione metabolism);ko04016(MAPK signaling pathway - plant);ko04075(Plant hormone signal transduction)
PC-3p-12333_982	XM_016080573.2	3615	3637	3628	-42.7	-29.9	0.700234	7.5	1-11,3637-3627;13-24,3626-3615	12-12,x-x[BULq]	((((((((((((-(((((((((((&))))))))))).))))))))))))	CCGGCAACUGGU-AGGCCUAGUAG&UUGUUGGGCUUUAUCAGUUGCUGG	0	0	NA	NA	NA	1	30.281	4	0.97078	Output/S0h/cleaveLand_result/t_plot/PC-3p-12333_982_XM_016080573.2_3628_TPlot.pdf	0	30.281	-Inf	down	3.7368e-08	6.97196e-08	yes	GO:0005623(cell);GO:0060255(regulation of macromolecule metabolic process);GO:0019219(regulation of nucleobase-containing compound metabolic process);GO:0044260(cellular macromolecule metabolic process);GO:0050789(regulation of biological process);GO:0019538(protein metabolic process);GO:0005737(cytoplasm);GO:2000112(regulation of cellular macromolecule biosynthetic process);GO:0044444(cytoplasmi…	ko00480(Glutathione metabolism);ko04016(MAPK signaling pathway - plant);ko04075(Plant hormone signal transduction)
PC-3p-12333_982	XM_016082583.2	583	606	597	-42.7	-28.8	0.674473	11	1-4,606-603;6-6,601-601;8-9,599-598;12-24,595-583	5-5,602-602[SIL];7-7,600-600[SIL];10-11,597-596[SIL]	(((((((((((((..((.(.((((&)))).).))..)))))))))))))	CCGGCGACUGGUACUGCGCCGCAG&UUGUUGGGCUUUAUCAGUUGCUGG	2	53.6509	2	0.946748	Output/S24h/cleaveLand_result/t_plot/PC-3p-12333_982_XM_016082583.2_597_TPlot.pdf	0	0	NA	NA	NA	53.6509	0	Inf	up	2.3929e-13	9.82167e-13	yes	GO:0046914(transition metal ion binding);GO:0008270(zinc ion binding);GO:0043169(cation binding);GO:0043167(ion binding);GO:0005488(binding);GO:0046872(metal ion binding)	ko03022(Basal transcription factors)
PC-3p-12333_982	XM_016083797.2	438	464	455	-42.7	-30.3	0.709602	11.5	1-11,464-454;12-19,450-443;21-24,441-438	x-x,453-451[BULt];20-20,442-442[SIL]	((((.((((((((...(((((((((((&)))))))))))---)))))))).))))	CCAGGAGCUGGUGGACAGGUCCAACAG&UUGUUGGGCUU---UAUCAGUUGCUGG	1	26.8255	4	0.915958	Output/S24h/cleaveLand_result/t_plot/PC-3p-12333_982_XM_016083797.2_455_TPlot.pdf	0	0	NA	NA	NA	26.8255	0	Inf	up	2.2264e-07	2.56268e-07	yes	GO:0009719(response to endogenous stimulus);GO:0042221(response to chemical);GO:0009725(response to hormone);GO:0050896(response to stimulus);GO:0010033(response to organic substance);GO:0009733(response to auxin)	ko04075(Plant hormone signal transduction)
PC-3p-12333_982	XM_016086989.2	1690	1714	1705	-42.7	-28.8	0.674473	9	3-16,1712-1699;18-24,1696-1690	1-2,1714-1713[UP5];17-17,1698-1697[AILt]	(((((((..((((((((((((((..&..))))))))))))))-.)))))))	UCAGCAGGAUGAUAAGGCUCAGCCU&UUGUUGGGCUUUAUCA-GUUGCUGG	0	0	NA	NA	NA	1	30.281	4	0.999454	Output/S0h/cleaveLand_result/t_plot/PC-3p-12333_982_XM_016086989.2_1705_TPlot.pdf	0	30.281	-Inf	down	3.7368e-08	6.97196e-08	yes	GO:0032549(ribonucleoside binding);GO:1901265(nucleoside phosphate binding);GO:0017111(nucleoside-triphosphatase activity);GO:0036094(small molecule binding);GO:0044249(cellular biosynthetic process);GO:0044238(primary metabolic process);GO:1901564(organonitrogen compound metabolic process);GO:0017076(purine nucleotide binding);GO:0003924(GTPase activity);GO:1901363(heterocyclic compound binding)…	ko03013(RNA transport)
PC-3p-12333_982	XM_016086990.2	1618	1642	1633	-42.7	-28.8	0.674473	9	3-16,1640-1627;18-24,1624-1618	1-2,1642-1641[UP5];17-17,1626-1625[AILt]	(((((((..((((((((((((((..&..))))))))))))))-.)))))))	UCAGCAGGAUGAUAAGGCUCAGCCU&UUGUUGGGCUUUAUCA-GUUGCUGG	0	0	NA	NA	NA	1	30.281	4	0.999554	Output/S0h/cleaveLand_result/t_plot/PC-3p-12333_982_XM_016086990.2_1633_TPlot.pdf	0	30.281	-Inf	down	3.7368e-08	6.97196e-08	yes	GO:0032549(ribonucleoside binding);GO:1901265(nucleoside phosphate binding);GO:0017111(nucleoside-triphosphatase activity);GO:0036094(small molecule binding);GO:0044249(cellular biosynthetic process);GO:0044238(primary metabolic process);GO:1901564(organonitrogen compound metabolic process);GO:0017076(purine nucleotide binding);GO:0003924(GTPase activity);GO:1901363(heterocyclic compound binding)…	ko03013(RNA transport)
PC-3p-12333_982	XM_016089734.2	285	309	300	-42.7	-28.1	0.65808	8.5	3-16,307-294;18-21,292-289;22-24,287-285	1-2,309-308[UP5];17-17,293-293[SIL];x-x,288-288[BULt]	(((.((((.((((((((((((((..&..)))))))))))))).))))-)))	CUAUGUAGGUGAUGAAGCCCAAUCC&UUGUUGGGCUUUAUCAGUUGC-UGG	1	26.8255	4	0.999997	Output/S24h/cleaveLand_result/t_plot/PC-3p-12333_982_XM_016089734.2_300_TPlot.pdf	2	60.562	3	0.664141	Output/S0h/cleaveLand_result/t_plot/PC-3p-12333_982_XM_016089734.2_300_TPlot.pdf	26.8255	60.562	-1.17481	down	0.00030739	0.000341326	yes	GO:0005524(ATP binding);GO:0035639(purine ribonucleoside triphosphate binding);GO:0017076(purine nucleotide binding);GO:0032553(ribonucleotide binding);GO:0032555(purine ribonucleotide binding);GO:1901265(nucleoside phosphate binding);GO:0097367(carbohydrate derivative binding);GO:0097159(organic cyclic compound binding);GO:0005488(binding);GO:1901363(heterocyclic compound binding);GO:0043167(ion…	NA
PC-3p-12333_982	XM_016089735.2	333	357	348	-42.7	-28.1	0.65808	8.5	3-16,355-342;18-21,340-337;22-24,335-333	1-2,357-356[UP5];17-17,341-341[SIL];x-x,336-336[BULt]	(((.((((.((((((((((((((..&..)))))))))))))).))))-)))	CUAUGUAGGUGAUGAAGCCCAAUCC&UUGUUGGGCUUUAUCAGUUGC-UGG	1	26.8255	4	0.999997	Output/S24h/cleaveLand_result/t_plot/PC-3p-12333_982_XM_016089735.2_348_TPlot.pdf	0	0	NA	NA	NA	26.8255	0	Inf	up	2.2264e-07	2.56268e-07	yes	GO:0017076(purine nucleotide binding);GO:0000166(nucleotide binding);GO:1901363(heterocyclic compound binding);GO:0032553(ribonucleotide binding);GO:0043167(ion binding);GO:0030554(adenyl nucleotide binding);GO:0043168(anion binding);GO:0005488(binding);GO:1901265(nucleoside phosphate binding);GO:0097367(carbohydrate derivative binding);GO:0032559(adenyl ribonucleotide binding);GO:0036094(small m…	NA
PC-3p-12333_982	XM_016089736.2	335	359	350	-42.7	-28.1	0.65808	8.5	3-16,357-344;18-21,342-339;22-24,337-335	1-2,359-358[UP5];17-17,343-343[SIL];x-x,338-338[BULt]	(((.((((.((((((((((((((..&..)))))))))))))).))))-)))	CUAUGUAGGUGAUGAAGCCCAAUCC&UUGUUGGGCUUUAUCAGUUGC-UGG	1	26.8255	4	0.999997	Output/S24h/cleaveLand_result/t_plot/PC-3p-12333_982_XM_016089736.2_350_TPlot.pdf	0	0	NA	NA	NA	26.8255	0	Inf	up	2.2264e-07	2.56268e-07	yes	GO:0017076(purine nucleotide binding);GO:0000166(nucleotide binding);GO:1901363(heterocyclic compound binding);GO:0032553(ribonucleotide binding);GO:0043167(ion binding);GO:0030554(adenyl nucleotide binding);GO:0043168(anion binding);GO:0005488(binding);GO:1901265(nucleoside phosphate binding);GO:0097367(carbohydrate derivative binding);GO:0032559(adenyl ribonucleotide binding);GO:0036094(small m…	NA
PC-3p-12333_982	XM_016091379.2	3770	3797	3788	-42.7	-31.5	0.737705	7	1-12,3797-3786;14-18,3784-3780;19-23,3775-3771	13-13,3785-3785[SIL];x-x,3779-3776[BULt];24-24,3770-3770[UP3]	.(((((....(((((.((((((((((((&)))))))))))).)))))----))))).	ACAGCGUAAUGCUGAGAAAGCCCAACAA&UUGUUGGGCUUUAUCAGU----UGCUGG	1	26.8255	4	0.607407	Output/S24h/cleaveLand_result/t_plot/PC-3p-12333_982_XM_016091379.2_3788_TPlot.pdf	0	0	NA	NA	NA	26.8255	0	Inf	up	2.2264e-07	2.56268e-07	yes	GO:0016020(membrane);GO:0031224(intrinsic component of membrane);GO:0016021(integral component of membrane);GO:0044425(membrane part)	NA
PC-3p-12333_982	XM_016096512.2	2143	2166	2157	-42.7	-28.5	0.667447	6.5	2-3,2165-2164;5-14,2162-2153;17-24,2150-2143	1-1,2166-2166[UP5];4-4,2163-2163[SIL];15-16,2152-2151[SIL]	((((((((..((((((((((.((.&.)).))))))))))..))))))))	CCGGCAACCAAUAAAGCCUAUCAC&UUGUUGGGCUUUAUCAGUUGCUGG	0	0	NA	NA	NA	1	30.281	4	0.999857	Output/S0h/cleaveLand_result/t_plot/PC-3p-12333_982_XM_016096512.2_2157_TPlot.pdf	0	30.281	-Inf	down	3.7368e-08	6.97196e-08	yes	GO:0090304(nucleic acid metabolic process);GO:0044428(nuclear part);GO:0034660(ncRNA metabolic process);GO:0043414(macromolecule methylation);GO:1990904(ribonucleoprotein complex);GO:0031974(membrane-enclosed lumen);GO:0001510(RNA methylation);GO:0043412(macromolecule modification);GO:0046483(heterocycle metabolic process);GO:0016070(RNA metabolic process);GO:0016741(transferase activity, transfe…	NA
PC-3p-12333_982	XM_016096748.2	1188	1216	1202	-42.7	-28.2	0.660422	15.5	2-7,1215-1210;8-19,1204-1193;21-24,1191-1188	1-1,1216-1216[UP5];x-x,1209-1205[BULt];20-20,1192-1192[SIL]	((((.((((((((((((.....((((((.&.))))))-----)))))))))))).))))	CCAGGAAUUGAUGAGGUUUGCUCCAACAC&UUGUUGG-----GCUUUAUCAGUUGCUGG	0	0	NA	NA	NA	1	30.281	4	0.999976	Output/S0h/cleaveLand_result/t_plot/PC-3p-12333_982_XM_016096748.2_1202_TPlot.pdf	0	30.281	-Inf	down	3.7368e-08	6.97196e-08	yes	GO:0072655(establishment of protein localization to mitochondrion);GO:0031224(intrinsic component of membrane);GO:0070727(cellular macromolecule localization);GO:0032555(purine ribonucleotide binding);GO:0006886(intracellular protein transport);GO:0043226(organelle);GO:1901265(nucleoside phosphate binding);GO:0044429(mitochondrial part);GO:0015031(protein transport);GO:0044237(cellular metabolic …	NA
PC-3p-12333_982	XM_016097021.2	344	370	361	-42.7	-30.2	0.70726	10.5	2-5,369-366;7-18,364-353;19-23,349-345	1-1,370-370[UP5];6-6,365-365[SIL];x-x,352-350[BULt];24-24,344-344[UP3]	.(((((...((((((((((((.((((.&.)))).))))))))))))---))))).	ACAGCAUCAGCUGAUGAAGCUGAGCAU&UUGUUGGGCUUUAUCAGU---UGCUGG	1	26.8255	4	0.964407	Output/S24h/cleaveLand_result/t_plot/PC-3p-12333_982_XM_016097021.2_361_TPlot.pdf	0	0	NA	NA	NA	26.8255	0	Inf	up	2.2264e-07	2.56268e-07	yes	GO:0020037(heme binding);GO:0046906(tetrapyrrole binding);GO:0009055(electron transfer activity);GO:1901363(heterocyclic compound binding);GO:0005488(binding);GO:0097159(organic cyclic compound binding)	ko01100(Metabolic pathways);ko00190(Oxidative phosphorylation)
PC-3p-12333_982	XM_016098183.2	1113	1137	1128	-42.7	-32	0.749415	7.5	2-6,1136-1132;8-13,1130-1125;14-23,1123-1114	1-1,1137-1137[UP5];7-7,1131-1131[SIL];x-x,1124-1124[BULt];24-24,1113-1113[UP3]	.((((((((((.((((((.(((((.&.))))).))))))-)))))))))).	GCAGCAGCUGAUUAAGGCGCAGCAC&UUGUUGGGCUUUA-UCAGUUGCUGG	0	0	NA	NA	NA	1	30.281	4	0.402071	Output/S0h/cleaveLand_result/t_plot/PC-3p-12333_982_XM_016098183.2_1128_TPlot.pdf	0	30.281	-Inf	down	3.7368e-08	6.97196e-08	yes	NA	NA
PC-3p-12333_982	XM_016101716.2	568	595	585	-42.7	-31.5	0.737705	7	1-7,595-589;8-17,587-578;18-20,575-573;21-24,571-568	x-x,588-588[BULt];x-x,577-576[BULt];x-x,572-572[BULt]	((((.(((..((((((((((.(((((((&)))))))-))))))))))--)))-))))	CCAGACAAUUCUGAUGAAGCACCAGCAA&UUGUUGG-GCUUUAUCAG--UUG-CUGG	0	0	NA	NA	NA	1	30.281	4	0.60019	Output/S0h/cleaveLand_result/t_plot/PC-3p-12333_982_XM_016101716.2_585_TPlot.pdf	0	30.281	-Inf	down	3.7368e-08	6.97196e-08	yes	GO:0043229(intracellular organelle);GO:2000112(regulation of cellular macromolecule biosynthetic process);GO:0003677(DNA binding);GO:0050789(regulation of biological process);GO:0010468(regulation of gene expression);GO:0044464(cell part);GO:0051171(regulation of nitrogen compound metabolic process);GO:0006355(regulation of transcription, DNA-templated);GO:0019219(regulation of nucleobase-contain…	NA
PC-3p-12333_982	XM_016102403.2	1638	1663	1655	-42.7	-29.7	0.69555	8.5	1-8,1663-1656;10-18,1655-1647;19-23,1643-1639	9-9,x-x[BULq];x-x,1646-1644[BULt];24-24,1638-1638[UP3]	.(((((...(((((((((-((((((((&)))))))).)))))))))---))))).	GCAGCAUAUGCUGAUGAA-CCCAGCAA&UUGUUGGGCUUUAUCAGU---UGCUGG	1	26.8255	4	0.989418	Output/S24h/cleaveLand_result/t_plot/PC-3p-12333_982_XM_016102403.2_1655_TPlot.pdf	1	30.281	4	0.982134	Output/S0h/cleaveLand_result/t_plot/PC-3p-12333_982_XM_016102403.2_1655_TPlot.pdf	26.8255	30.281	-0.17481	down	0.64747	0.647871	yes	GO:0030276(clathrin binding);GO:0030135(coated vesicle);GO:0005622(intracellular);GO:0070271(protein complex biogenesis);GO:0005737(cytoplasm);GO:0022607(cellular component assembly);GO:0006461(protein complex assembly);GO:0044464(cell part);GO:0005488(binding);GO:0043933(macromolecular complex subunit organization);GO:0044085(cellular component biogenesis);GO:0065003(macromolecular complex assem…	NA
PC-3p-12333_982	XM_016104994.2	601	623	615	-42.7	-29.5	0.690867	7.5	2-5,622-619;8-23,617-602	1-1,623-623[UP5];6-7,618-618[AILq];24-24,601-601[UP3]	.((((((((((((((((.-((((.&.))))..)))))))))))))))).	ACAGCAACUGGUAAAGCA-AGCAC&UUGUUGGGCUUUAUCAGUUGCUGG	1	26.8255	4	0.998195	Output/S24h/cleaveLand_result/t_plot/PC-3p-12333_982_XM_016104994.2_615_TPlot.pdf	0	0	NA	NA	NA	26.8255	0	Inf	up	2.2264e-07	2.56268e-07	yes	GO:0005488(binding);GO:1901363(heterocyclic compound binding);GO:0003676(nucleic acid binding);GO:0097159(organic cyclic compound binding)	ko03013(RNA transport);ko03008(Ribosome biogenesis in eukaryotes)
PC-3p-12333_982	XM_016104995.2	603	625	617	-42.7	-29.5	0.690867	7.5	2-5,624-621;8-23,619-604	1-1,625-625[UP5];6-7,620-620[AILq];24-24,603-603[UP3]	.((((((((((((((((.-((((.&.))))..)))))))))))))))).	ACAGCAACUGGUAAAGCA-AGCAC&UUGUUGGGCUUUAUCAGUUGCUGG	2	53.6509	2	0.889631	Output/S24h/cleaveLand_result/t_plot/PC-3p-12333_982_XM_016104995.2_617_TPlot.pdf	0	0	NA	NA	NA	53.6509	0	Inf	up	2.3929e-13	9.82167e-13	yes	GO:0005488(binding);GO:1901363(heterocyclic compound binding);GO:0003676(nucleic acid binding);GO:0097159(organic cyclic compound binding)	ko03013(RNA transport);ko03008(Ribosome biogenesis in eukaryotes)
PC-3p-12333_982	XM_016107701.2	597	622	613	-42.7	-27.8	0.651054	7	1-5,622-618;7-15,616-608;17-24,604-597	6-6,617-617[SIL];16-16,607-605[AILt]	((((((((...(((((((((.(((((&))))).)))))))))--.))))))))	CUAGCAACAAAGAUAAAGCUGAACAG&UUGUUGGGCUUUAUC--AGUUGCUGG	2	53.6509	2	0.99287	Output/S24h/cleaveLand_result/t_plot/PC-3p-12333_982_XM_016107701.2_613_TPlot.pdf	1	30.281	4	0.999997	Output/S0h/cleaveLand_result/t_plot/PC-3p-12333_982_XM_016107701.2_613_TPlot.pdf	53.6509	30.281	0.82519	up	0.010743	0.0115483	yes	NA	NA
PC-3p-12333_982	XM_016109399.2	510	533	524	-42.7	-27.9	0.653396	10	3-12,531-522;14-18,520-516;20-22,514-512	1-2,533-532[UP5];13-13,521-521[SIL];19-19,515-515[SIL];23-24,511-510[UP3]	..(((.(((((.((((((((((..&..)))))))))).))))).)))..	CAAGCUGCUGGCGAGGCCCAACGU&UUGUUGGGCUUUAUCAGUUGCUGG	0	0	NA	NA	NA	1	30.281	4	0.999995	Output/S0h/cleaveLand_result/t_plot/PC-3p-12333_982_XM_016109399.2_524_TPlot.pdf	0	30.281	-Inf	down	3.7368e-08	6.97196e-08	yes	GO:0005737(cytoplasm);GO:0006950(response to stress);GO:0008152(metabolic process);GO:0009987(cellular process);GO:0071704(organic substance metabolic process);GO:0006767(water-soluble vitamin metabolic process);GO:0019438(aromatic compound biosynthetic process);GO:0006725(cellular aromatic compound metabolic process);GO:0044446(intracellular organelle part);GO:0043227(membrane-bounded organelle)…	ko00730(Thiamine metabolism);ko01100(Metabolic pathways)
PC-3p-12333_982	XM_016111496.2	723	747	738	-42.7	-27.8	0.651054	7	2-2,746-746;4-14,744-734;17-18,731-730;19-24,728-723	1-1,747-747[UP5];3-3,745-745[SIL];15-16,733-732[SIL];x-x,729-729[BULt]	((((((.((..(((((((((((.(.&.).)))))))))))..))-))))))	CCAGCAGACCCAUGAAGCCCAAGAU&UUGUUGGGCUUUAUCAGU-UGCUGG	1	26.8255	4	0.999999	Output/S24h/cleaveLand_result/t_plot/PC-3p-12333_982_XM_016111496.2_738_TPlot.pdf	1	30.281	4	0.999997	Output/S0h/cleaveLand_result/t_plot/PC-3p-12333_982_XM_016111496.2_738_TPlot.pdf	26.8255	30.281	-0.17481	down	0.64747	0.647871	yes	GO:0016021(integral component of membrane);GO:0044425(membrane part);GO:0031224(intrinsic component of membrane);GO:0016020(membrane)	NA
PC-3p-12333_982	XM_016112947.2	476	501	490	-42.7	-29.2	0.683841	13	1-7,501-495;8-21,492-479	x-x,494-493[BULt];22-24,478-476[UP3]	...((((((((((((((..(((((((&)))))))--))))))))))))))...	GUCGCAGCUGGUGGAGCCACCGGCGA&UUGUUGG--GCUUUAUCAGUUGCUGG	0	0	NA	NA	NA	1	30.281	4	0.997446	Output/S0h/cleaveLand_result/t_plot/PC-3p-12333_982_XM_016112947.2_490_TPlot.pdf	0	30.281	-Inf	down	3.7368e-08	6.97196e-08	yes	NA	NA
PC-3p-12333_982	XM_016113065.2	1815	1837	1829	-42.7	-27.96	0.654801	12	2-9,1836-1829;17-24,1822-1815	1-1,1837-1837[UP5];10-16,1828-1823[AILq]	((((((((......-((((((((.&.)))))))).......))))))))	CCAGCAACAAUCUU-GCCCAGCAC&UUGUUGGGCUUUAUCAGUUGCUGG	1	26.8255	4	0.999999	Output/S24h/cleaveLand_result/t_plot/PC-3p-12333_982_XM_016113065.2_1829_TPlot.pdf	0	0	NA	NA	NA	26.8255	0	Inf	up	2.2264e-07	2.56268e-07	yes	NA	ko04136(Autophagy - other)
PC-3p-12333_982	XM_016114790.2	3512	3537	3529	-42.7	-29.42	0.688993	9.5	1-4,3537-3534;6-16,3533-3523;19-24,3517-3512	5-5,x-x[BULq];17-18,3522-3518[AILt]	((((((.....(((((((((((-((((&)))).)))))))))))---..))))))	CCGGCAGGGUGUGAUGAGGCCC-ACAA&UUGUUGGGCUUUAUCA---GUUGCUGG	1	26.8255	4	0.998327	Output/S24h/cleaveLand_result/t_plot/PC-3p-12333_982_XM_016114790.2_3529_TPlot.pdf	0	0	NA	NA	NA	26.8255	0	Inf	up	2.2264e-07	2.56268e-07	yes	GO:0006793(phosphorus metabolic process);GO:0043412(macromolecule modification);GO:1901265(nucleoside phosphate binding);GO:0000166(nucleotide binding);GO:0006468(protein phosphorylation);GO:0097367(carbohydrate derivative binding);GO:0016310(phosphorylation);GO:0016020(membrane);GO:0030554(adenyl nucleotide binding);GO:0016772(transferase activity, transferring phosphorus-containing groups);GO:0…	ko04626(Plant-pathogen interaction);ko04016(MAPK signaling pathway - plant)
PC-3p-12333_982	XM_016117396.2	1293	1314	1307	-42.7	-30	0.702576	11.5	2-8,1313-1307;12-24,1305-1293	1-1,1314-1314[UP5];9-11,1306-1306[AILq]	(((((((((((((.--(((((((.&.)))))))...)))))))))))))	CCGGCGGCUGAUGC--CCCGGCAG&UUGUUGGGCUUUAUCAGUUGCUGG	3	80.4764	3	0.312086	Output/S24h/cleaveLand_result/t_plot/PC-3p-12333_982_XM_016117396.2_1307_TPlot.pdf	10	302.81	2	0.681574	Output/S0h/cleaveLand_result/t_plot/PC-3p-12333_982_XM_016117396.2_1307_TPlot.pdf	80.4764	302.81	-1.91178	down	6.8017e-30	2.41697e-28	yes	NA	NA
PC-3p-12333_982	XM_021128888.1	462	485	476	-42.7	-30.4	0.711944	10.5	2-5,484-481;7-10,479-476;13-24,473-462	1-1,485-485[UP5];6-6,480-480[SIL];11-12,475-474[SIL]	((((((((((((..((((.((((.&.)))).))))..))))))))))))	CCAGCAAUUGAUUUGGCUGAGCAU&UUGUUGGGCUUUAUCAGUUGCUGG	0	0	NA	NA	NA	1	30.281	4	0.750009	Output/S0h/cleaveLand_result/t_plot/PC-3p-12333_982_XM_021128888.1_476_TPlot.pdf	0	30.281	-Inf	down	3.7368e-08	6.97196e-08	yes	GO:0008270(zinc ion binding);GO:0044425(membrane part);GO:0016020(membrane);GO:0016021(integral component of membrane);GO:0031224(intrinsic component of membrane);GO:0005488(binding);GO:0043169(cation binding);GO:0043167(ion binding);GO:0046872(metal ion binding);GO:0046914(transition metal ion binding)	NA
PC-3p-12333_982	XM_021131518.1	1527	1551	1542	-42.7	-28.8	0.674473	9	3-16,1549-1536;18-24,1533-1527	1-2,1551-1550[UP5];17-17,1535-1534[AILt]	(((((((..((((((((((((((..&..))))))))))))))-.)))))))	UCAGCAGGAUGAUAAGGCUCAGCCU&UUGUUGGGCUUUAUCA-GUUGCUGG	0	0	NA	NA	NA	1	30.281	4	0.999523	Output/S0h/cleaveLand_result/t_plot/PC-3p-12333_982_XM_021131518.1_1542_TPlot.pdf	0	30.281	-Inf	down	3.7368e-08	6.97196e-08	yes	GO:0032549(ribonucleoside binding);GO:1901265(nucleoside phosphate binding);GO:0017111(nucleoside-triphosphatase activity);GO:0036094(small molecule binding);GO:0044249(cellular biosynthetic process);GO:0044238(primary metabolic process);GO:1901564(organonitrogen compound metabolic process);GO:0017076(purine nucleotide binding);GO:0003924(GTPase activity);GO:1901363(heterocyclic compound binding)…	ko03013(RNA transport)
PC-3p-12333_982	XM_021131735.1	592	619	610	-42.7	-28.6	0.669789	11	3-17,617-603;18-24,598-592	1-2,619-618[UP5];x-x,602-599[BULt]	(((((((....(((((((((((((((..&..)))))))))))))))----)))))))	CCAGCAAUGCCCUGAUAAGGUUCAAUGG&UUGUUGGGCUUUAUCAG----UUGCUGG	2	53.6509	2	0.964443	Output/S24h/cleaveLand_result/t_plot/PC-3p-12333_982_XM_021131735.1_610_TPlot.pdf	0	0	NA	NA	NA	53.6509	0	Inf	up	2.3929e-13	9.82167e-13	yes	GO:0003824(catalytic activity);GO:0016757(transferase activity, transferring glycosyl groups);GO:0016740(transferase activity)	ko00052(Galactose metabolism)
PC-3p-12333_982	XM_021137292.1	957	985	971	-42.7	-28.2	0.660422	15.5	2-7,984-979;8-19,973-962;21-24,960-957	1-1,985-985[UP5];x-x,978-974[BULt];20-20,961-961[SIL]	((((.((((((((((((.....((((((.&.))))))-----)))))))))))).))))	CCAGGAAUUGAUGAGGUUUGCUCCAACAC&UUGUUGG-----GCUUUAUCAGUUGCUGG	0	0	NA	NA	NA	1	30.281	4	0.999973	Output/S0h/cleaveLand_result/t_plot/PC-3p-12333_982_XM_021137292.1_971_TPlot.pdf	0	30.281	-Inf	down	3.7368e-08	6.97196e-08	yes	GO:0072655(establishment of protein localization to mitochondrion);GO:0031224(intrinsic component of membrane);GO:0070727(cellular macromolecule localization);GO:0032555(purine ribonucleotide binding);GO:0006886(intracellular protein transport);GO:0043226(organelle);GO:1901265(nucleoside phosphate binding);GO:0044429(mitochondrial part);GO:0015031(protein transport);GO:0044237(cellular metabolic …	NA
PC-3p-12333_982	XM_021137298.1	816	844	830	-42.7	-28.2	0.660422	15.5	2-7,843-838;8-19,832-821;21-24,819-816	1-1,844-844[UP5];x-x,837-833[BULt];20-20,820-820[SIL]	((((.((((((((((((.....((((((.&.))))))-----)))))))))))).))))	CCAGGAAUUGAUGAGGUUUGCUCCAACAC&UUGUUGG-----GCUUUAUCAGUUGCUGG	0	0	NA	NA	NA	1	30.281	4	0.999969	Output/S0h/cleaveLand_result/t_plot/PC-3p-12333_982_XM_021137298.1_830_TPlot.pdf	0	30.281	-Inf	down	3.7368e-08	6.97196e-08	yes	GO:0072655(establishment of protein localization to mitochondrion);GO:0031224(intrinsic component of membrane);GO:0070727(cellular macromolecule localization);GO:0032555(purine ribonucleotide binding);GO:0006886(intracellular protein transport);GO:0043226(organelle);GO:1901265(nucleoside phosphate binding);GO:0044429(mitochondrial part);GO:0015031(protein transport);GO:0044237(cellular metabolic …	NA
PC-3p-12333_982	XM_021142129.1	48	77	68	-42.7	-29.86	0.699297	12	1-15,77-63;17-24,55-48	16-16,62-56[AILt]	((((((((.......(((((((((((((((&)))))))))))))))------.))))))))	CCGGCGGCACGGUUCGGUGAAGCCUAACGA&UUGUUGGGCUUUAUC------AGUUGCUGG	1	26.8255	4	0.983323	Output/S24h/cleaveLand_result/t_plot/PC-3p-12333_982_XM_021142129.1_68_TPlot.pdf	0	0	NA	NA	NA	26.8255	0	Inf	up	2.2264e-07	2.56268e-07	yes	GO:0017076(purine nucleotide binding);GO:0032555(purine ribonucleotide binding);GO:0006796(phosphate-containing compound metabolic process);GO:0019538(protein metabolic process);GO:0036094(small molecule binding);GO:0000166(nucleotide binding);GO:0005524(ATP binding);GO:1901363(heterocyclic compound binding);GO:0016740(transferase activity);GO:0004674(protein serine/threonine kinase activity);GO:…	NA
PC-3p-123460_58	BGI_novel_T005315	147	171	161	-38.7	-27	0.697674	15	6-8,166-164;10-22,161-149	1-5,171-167[UP5];9-9,163-162[AILt];23-24,148-147[UP3]	..(((((((((((((..(((.....&.....)))-.)))))))))))))..	UCUCAGACCCUCCGAACUUGAAGAA&AAAUACAA-AUCGGAGGGUCUGAUU	1	26.8255	4	0.695072	Output/S24h/cleaveLand_result/t_plot/PC-3p-123460_58_BGI_novel_T005315_161_TPlot.pdf	0	0	NA	NA	NA	26.8255	0	Inf	up	2.2264e-07	2.56268e-07	yes	GO:0050789(regulation of biological process);GO:0030234(enzyme regulator activity);GO:0006810(transport);GO:0060341(regulation of cellular localization);GO:0060589(nucleoside-triphosphatase regulator activity);GO:0044425(membrane part);GO:0048209(regulation of vesicle targeting, to, from or within Golgi);GO:0009306(protein secretion);GO:0016491(oxidoreductase activity);GO:0016628(oxidoreductase a…	ko04141(Protein processing in endoplasmic reticulum)
PC-3p-123460_58	XM_016098700.2	1078	1100	1091	-38.7	-25.6	0.661499	9.5	2-6,1099-1095;8-13,1093-1088;15-21,1087-1081	1-1,1100-1100[UP5];7-7,1094-1094[SIL];14-14,x-x[BULq];22-24,1080-1078[UP3]	...(((((((-((((((.(((((.&.))))).)))))).)))))))...	AACCGGACCC-CCGGUUCGUGUUC&AAAUACAAAUCGGAGGGUCUGAUU	0	0	NA	NA	NA	1	30.281	4	0.808841	Output/S0h/cleaveLand_result/t_plot/PC-3p-123460_58_XM_016098700.2_1091_TPlot.pdf	0	30.281	-Inf	down	3.7368e-08	6.97196e-08	yes	NA	ko03040(Spliceosome)
PC-3p-123460_58	XM_021128730.1	1178	1200	1191	-38.7	-25.6	0.661499	9.5	3-17,1198-1184;19-21,1183-1181	1-2,1200-1199[UP5];18-18,x-x[BULq];22-24,1180-1178[UP3]	...(((-(((((((((((((((..&..))))))))))))))).)))...	UACCAG-CCUUCUGAUUUGUGUAG&AAAUACAAAUCGGAGGGUCUGAUU	0	0	NA	NA	NA	1	30.281	4	0.821244	Output/S0h/cleaveLand_result/t_plot/PC-3p-123460_58_XM_021128730.1_1191_TPlot.pdf	0	30.281	-Inf	down	3.7368e-08	6.97196e-08	yes	GO:0044464(cell part);GO:0016021(integral component of membrane);GO:0016020(membrane);GO:0044425(membrane part);GO:0043231(intracellular membrane-bounded organelle);GO:0044424(intracellular part);GO:0043229(intracellular organelle);GO:0043226(organelle);GO:0043227(membrane-bounded organelle);GO:0005622(intracellular);GO:0005623(cell);GO:0005634(nucleus);GO:0031224(intrinsic component of membrane)	NA
PC-3p-123460_58	XM_021128731.1	1088	1110	1101	-38.7	-25.6	0.661499	9.5	3-17,1108-1094;19-21,1093-1091	1-2,1110-1109[UP5];18-18,x-x[BULq];22-24,1090-1088[UP3]	...(((-(((((((((((((((..&..))))))))))))))).)))...	UACCAG-CCUUCUGAUUUGUGUAG&AAAUACAAAUCGGAGGGUCUGAUU	0	0	NA	NA	NA	1	30.281	4	0.813068	Output/S0h/cleaveLand_result/t_plot/PC-3p-123460_58_XM_021128731.1_1101_TPlot.pdf	0	30.281	-Inf	down	3.7368e-08	6.97196e-08	yes	GO:0044464(cell part);GO:0016021(integral component of membrane);GO:0016020(membrane);GO:0044425(membrane part);GO:0043231(intracellular membrane-bounded organelle);GO:0044424(intracellular part);GO:0043229(intracellular organelle);GO:0043226(organelle);GO:0043227(membrane-bounded organelle);GO:0005622(intracellular);GO:0005623(cell);GO:0005634(nucleus);GO:0031224(intrinsic component of membrane)	NA
PC-3p-123460_58	XM_021128732.1	1178	1200	1191	-38.7	-25.6	0.661499	9.5	3-17,1198-1184;19-21,1183-1181	1-2,1200-1199[UP5];18-18,x-x[BULq];22-24,1180-1178[UP3]	...(((-(((((((((((((((..&..))))))))))))))).)))...	UACCAG-CCUUCUGAUUUGUGUAG&AAAUACAAAUCGGAGGGUCUGAUU	0	0	NA	NA	NA	1	30.281	4	0.804519	Output/S0h/cleaveLand_result/t_plot/PC-3p-123460_58_XM_021128732.1_1191_TPlot.pdf	0	30.281	-Inf	down	3.7368e-08	6.97196e-08	yes	GO:0044464(cell part);GO:0016021(integral component of membrane);GO:0016020(membrane);GO:0044425(membrane part);GO:0043231(intracellular membrane-bounded organelle);GO:0044424(intracellular part);GO:0043229(intracellular organelle);GO:0043226(organelle);GO:0043227(membrane-bounded organelle);GO:0005622(intracellular);GO:0005623(cell);GO:0005634(nucleus);GO:0031224(intrinsic component of membrane)	NA
PC-3p-124350_58	XM_016079644.2	1371	1403	1394	-36.6	-25.5	0.696721	22.5	2-12,1402-1392;13-13,1382-1382;15-24,1380-1371	1-1,1403-1403[UP5];x-x,1391-1383[BULt];14-14,1381-1381[SIL]	((((((((((.(.........(((((((((((.&.)))))))))))---------).))))))))))	GGUAAGUCCAGGAGCAUGGCUGUCCGAUCUUAC&AUAAGAUCGGAU---------UGUGGAUUUAUC	0	0	NA	NA	NA	1	30.281	4	0.360586	Output/S0h/cleaveLand_result/t_plot/PC-3p-124350_58_XM_016079644.2_1394_TPlot.pdf	0	30.281	-Inf	down	3.7368e-08	6.97196e-08	yes	NA	NA
PC-3p-124350_58	XM_016088092.2	300	323	314	-36.6	-24.4	0.666667	12.5	5-21,319-303;24-24,300-300	1-4,323-320[UP5];22-23,302-301[SIL]	(..(((((((((((((((((....&....)))))))))))))))))..)	GUGAGGUCCACGGUUCGAUCCCAC&AUAAGAUCGGAUUGUGGAUUUAUC	0	0	NA	NA	NA	2	60.562	3	0.103758	Output/S0h/cleaveLand_result/t_plot/PC-3p-124350_58_XM_016088092.2_314_TPlot.pdf	0	60.562	-Inf	down	7.123e-15	4.42666e-14	yes	GO:0046872(metal ion binding);GO:0009636(response to toxic substance);GO:0006979(response to oxidative stress);GO:0009664(plant-type cell wall organization);GO:0042743(hydrogen peroxide metabolic process);GO:0005488(binding);GO:0050896(response to stimulus);GO:0005618(cell wall);GO:0009505(plant-type cell wall);GO:0016043(cellular component organization);GO:0071554(cell wall organization or bioge…	ko00940(Phenylpropanoid biosynthesis);ko01100(Metabolic pathways);ko01110(Biosynthesis of secondary metabolites)
PC-3p-124350_58	XM_016092863.2	534	560	551	-36.6	-24.3	0.663934	15	4-12,557-549;13-21,545-537	1-3,560-558[UP5];x-x,548-546[BULt];22-24,536-534[UP3]	...(((((((((...(((((((((...&...)))))))))---)))))))))...	UCCAAGUCCGCAAUCAUCCGAUCUACA&AUAAGAUCGGAU---UGUGGAUUUAUC	3	80.4764	2	0.449583	Output/S24h/cleaveLand_result/t_plot/PC-3p-124350_58_XM_016092863.2_551_TPlot.pdf	2	60.562	3	0.138414	Output/S0h/cleaveLand_result/t_plot/PC-3p-124350_58_XM_016092863.2_551_TPlot.pdf	80.4764	60.562	0.410153	up	0.093557	0.0998676	yes	NA	NA
PC-3p-124350_58	XM_021125692.1	1934	1957	1948	-36.6	-24.2	0.661202	11.5	4-6,1954-1952;8-11,1950-1947;13-24,1945-1934	1-3,1957-1955[UP5];7-7,1951-1951[SIL];12-12,1946-1946[SIL]	((((((((((((.((((.(((...&...))).)))).))))))))))))	GGUGGAUCCACAUUCUGUUCUCCA&AUAAGAUCGGAUUGUGGAUUUAUC	1	26.8255	4	0.889027	Output/S24h/cleaveLand_result/t_plot/PC-3p-124350_58_XM_021125692.1_1948_TPlot.pdf	0	0	NA	NA	NA	26.8255	0	Inf	up	2.2264e-07	2.56268e-07	yes	GO:0043226(organelle);GO:0005488(binding);GO:0007017(microtubule-based process);GO:1901363(heterocyclic compound binding);GO:0017111(nucleoside-triphosphatase activity);GO:0016787(hydrolase activity);GO:0005623(cell);GO:0031122(cytoplasmic microtubule organization);GO:0097435(supramolecular fiber organization);GO:0006996(organelle organization);GO:0000166(nucleotide binding);GO:1901265(nucleoside…	ko03013(RNA transport)
PC-3p-124350_58	XM_021133820.1	470	493	484	-36.6	-25.7	0.702186	8	1-11,493-483;13-20,481-474	12-12,482-482[SIL];21-24,473-470[UP3]	....((((((((.(((((((((((&))))))))))).))))))))....	UUUCAAUCCACACUCUGAUCUUGU&AUAAGAUCGGAUUGUGGAUUUAUC	0	0	NA	NA	NA	1	30.281	4	0.268781	Output/S0h/cleaveLand_result/t_plot/PC-3p-124350_58_XM_021133820.1_484_TPlot.pdf	0	30.281	-Inf	down	3.7368e-08	6.97196e-08	yes	GO:0031224(intrinsic component of membrane);GO:0016020(membrane);GO:0044425(membrane part);GO:0016021(integral component of membrane)	NA
PC-3p-124677_58	BGI_novel_T000725	394	416	408	-43.7	-31.7	0.7254	7	2-6,415-411;8-12,410-406;15-24,403-394	1-1,416-416[UP5];7-7,x-x[BULq];13-14,405-404[SIL]	((((((((((..(((((-(((((.&.))))).)))))..))))))))))	GGUGCAGGAAGAGGAGC-UCCGAA&AUCGGACGUUCCGAUUUCUGUACC	1	26.8255	4	0.0730071	Output/S24h/cleaveLand_result/t_plot/PC-3p-124677_58_BGI_novel_T000725_408_TPlot.pdf	0	0	NA	NA	NA	26.8255	0	Inf	up	2.2264e-07	2.56268e-07	yes	GO:0006725(cellular aromatic compound metabolic process);GO:0000166(nucleotide binding);GO:0097367(carbohydrate derivative binding);GO:0043168(anion binding);GO:0008026(ATP-dependent helicase activity);GO:0044428(nuclear part);GO:0070035(purine NTP-dependent helicase activity);GO:0043170(macromolecule metabolic process);GO:0032553(ribonucleotide binding);GO:0043233(organelle lumen);GO:0016787(hyd…	ko03040(Spliceosome)
PC-3p-124677_58	BGI_novel_T000726	394	416	408	-43.7	-31.7	0.7254	7	2-6,415-411;8-12,410-406;15-24,403-394	1-1,416-416[UP5];7-7,x-x[BULq];13-14,405-404[SIL]	((((((((((..(((((-(((((.&.))))).)))))..))))))))))	GGUGCAGGAAGAGGAGC-UCCGAA&AUCGGACGUUCCGAUUUCUGUACC	1	26.8255	4	0.140684	Output/S24h/cleaveLand_result/t_plot/PC-3p-124677_58_BGI_novel_T000726_408_TPlot.pdf	0	0	NA	NA	NA	26.8255	0	Inf	up	2.2264e-07	2.56268e-07	yes	GO:0006725(cellular aromatic compound metabolic process);GO:0000166(nucleotide binding);GO:0097367(carbohydrate derivative binding);GO:0043168(anion binding);GO:0008026(ATP-dependent helicase activity);GO:0044428(nuclear part);GO:0070035(purine NTP-dependent helicase activity);GO:0043170(macromolecule metabolic process);GO:0032553(ribonucleotide binding);GO:0043233(organelle lumen);GO:0016787(hyd…	ko03040(Spliceosome)
PC-3p-124677_58	XM_016076322.2	482	510	495	-43.7	-29.1	0.665904	15	2-6,509-505;7-9,502-500;10-16,495-489;18-24,488-482	1-1,510-510[UP5];x-x,504-503[BULt];x-x,499-496[BULt];17-17,x-x[BULq]	(((((((-(((((((....(((..(((((.&.)))))--)))----))))))).)))))))	GGUACAG-AAUCGGAGAAGGCGGUUCCGAG&AUCGGA--CGU----UCCGAUUUCUGUACC	0	0	NA	NA	NA	1	30.281	4	0.60019	Output/S0h/cleaveLand_result/t_plot/PC-3p-124677_58_XM_016076322.2_495_TPlot.pdf	0	30.281	-Inf	down	3.7368e-08	6.97196e-08	yes	GO:0065007(biological regulation);GO:2001141(regulation of RNA biosynthetic process);GO:0019219(regulation of nucleobase-containing compound metabolic process);GO:0050794(regulation of cellular process);GO:0005622(intracellular);GO:0031323(regulation of cellular metabolic process);GO:0003677(DNA binding);GO:2000112(regulation of cellular macromolecule biosynthetic process);GO:1901363(heterocyclic…	ko04016(MAPK signaling pathway - plant)
PC-3p-124677_58	XM_016092951.2	4410	4431	4422	-43.7	-29.6	0.677346	8	2-4,4430-4428;7-12,4425-4420;15-24,4419-4410	1-1,4431-4431[UP5];5-6,4427-4426[SIL];13-14,x-x[BULq]	((((((((((--((((((..(((.&.)))..))))))..))))))))))	GGUGCAGAAG--GGAACGGACGAG&AUCGGACGUUCCGAUUUCUGUACC	1	26.8255	4	0.349222	Output/S24h/cleaveLand_result/t_plot/PC-3p-124677_58_XM_016092951.2_4422_TPlot.pdf	0	0	NA	NA	NA	26.8255	0	Inf	up	2.2264e-07	2.56268e-07	yes	GO:0005515(protein binding);GO:0016772(transferase activity, transferring phosphorus-containing groups);GO:0003779(actin binding);GO:0006796(phosphate-containing compound metabolic process);GO:0009987(cellular process);GO:0016740(transferase activity);GO:0016301(kinase activity);GO:0016310(phosphorylation);GO:0006793(phosphorus metabolic process);GO:0003824(catalytic activity);GO:0005488(binding)…	NA
PC-3p-124677_58	XM_016093018.2	666	692	682	-43.7	-28.5	0.652174	8	2-8,691-685;9-16,683-676;17-21,674-670;22-24,668-666	1-1,692-692[UP5];x-x,684-684[BULt];x-x,675-675[BULt];x-x,669-669[BULt]	(((.(((((.((((((((.(((((((.&.)))))))-))))))))-)))))-)))	GGUCACAGAUAAUCGGGAGUGUCUGAA&AUCGGACG-UUCCGAUU-UCUGU-ACC	1	26.8255	4	0.864165	Output/S24h/cleaveLand_result/t_plot/PC-3p-124677_58_XM_016093018.2_682_TPlot.pdf	0	0	NA	NA	NA	26.8255	0	Inf	up	2.2264e-07	2.56268e-07	yes	GO:0051649(establishment of localization in cell);GO:0005622(intracellular);GO:0005623(cell);GO:0010605(negative regulation of macromolecule metabolic process);GO:0051172(negative regulation of nitrogen compound metabolic process);GO:0070727(cellular macromolecule localization);GO:0065007(biological regulation);GO:0006612(protein targeting to membrane);GO:0070972(protein localization to endoplasm…	ko03060(Protein export)
PC-3p-124677_58	XM_016093019.2	534	560	550	-43.7	-28.5	0.652174	8	2-8,559-553;9-16,551-544;17-21,542-538;22-24,536-534	1-1,560-560[UP5];x-x,552-552[BULt];x-x,543-543[BULt];x-x,537-537[BULt]	(((.(((((.((((((((.(((((((.&.)))))))-))))))))-)))))-)))	GGUCACAGAUAAUCGGGAGUGUCUGAA&AUCGGACG-UUCCGAUU-UCUGU-ACC	1	26.8255	4	0.867554	Output/S24h/cleaveLand_result/t_plot/PC-3p-124677_58_XM_016093019.2_550_TPlot.pdf	0	0	NA	NA	NA	26.8255	0	Inf	up	2.2264e-07	2.56268e-07	yes	GO:0051649(establishment of localization in cell);GO:0005622(intracellular);GO:0005623(cell);GO:0010605(negative regulation of macromolecule metabolic process);GO:0051172(negative regulation of nitrogen compound metabolic process);GO:0070727(cellular macromolecule localization);GO:0065007(biological regulation);GO:0006612(protein targeting to membrane);GO:0070972(protein localization to endoplasm…	ko03060(Protein export)
PC-3p-127107_56	BGI_novel_T000220	1878	1898	1889	-36.6	-27.1	0.740437	11	6-20,1893-1879	1-5,1898-1894[UP5];21-21,1878-1878[UP3]	.(((((((((((((((.....&.....))))))))))))))).	AAUGGUUCCAAGGUUCAAAAU&UCUAAGAGCCUUGGAACCAUA	0	0	NA	NA	NA	1	30.281	4	0.744356	Output/S0h/cleaveLand_result/t_plot/PC-3p-127107_56_BGI_novel_T000220_1889_TPlot.pdf	0	30.281	-Inf	down	3.7368e-08	6.97196e-08	yes	GO:0016705(oxidoreductase activity, acting on paired donors, with incorporation or reduction of molecular oxygen);GO:0046872(metal ion binding);GO:0043167(ion binding);GO:0016021(integral component of membrane);GO:0046906(tetrapyrrole binding);GO:0008152(metabolic process);GO:0016020(membrane);GO:0044425(membrane part);GO:0031224(intrinsic component of membrane);GO:0004497(monooxygenase activity)…	ko00906(Carotenoid biosynthesis)
PC-3p-127107_56	BGI_novel_T007530	731	751	743	-36.6	-23.9	0.653005	5.5	1-4,751-748;6-15,747-738;16-21,736-731	5-5,x-x[BULq];x-x,737-737[BULt]	((((((.((((((((((-((((&)))).))))))))))-))))))	UAUGGUGUUCAAGGUUC-UGGA&UCUAAGAGCCUUGGA-ACCAUA	1	26.8255	4	1	Output/S24h/cleaveLand_result/t_plot/PC-3p-127107_56_BGI_novel_T007530_743_TPlot.pdf	0	0	NA	NA	NA	26.8255	0	Inf	up	2.2264e-07	2.56268e-07	yes	GO:0043226(organelle);GO:1901360(organic cyclic compound metabolic process);GO:0043170(macromolecule metabolic process);GO:0036094(small molecule binding);GO:0097159(organic cyclic compound binding);GO:0005488(binding);GO:0050794(regulation of cellular process);GO:0016070(RNA metabolic process);GO:0044238(primary metabolic process);GO:1901363(heterocyclic compound binding);GO:0044260(cellular mac…	NA
PC-3p-127107_56	BGI_novel_T007753	1363	1384	1374	-36.6	-24.2	0.661202	7	1-8,1384-1377;9-16,1375-1368	x-x,1376-1376[BULt];17-21,1367-1363[UP3]	.....((((((((.((((((((&))))))))-)))))))).....	AGCUAUUCCAAGGACUCUUAGA&UCUAAGAG-CCUUGGAACCAUA	0	0	NA	NA	NA	1	30.281	4	0.999971	Output/S0h/cleaveLand_result/t_plot/PC-3p-127107_56_BGI_novel_T007753_1374_TPlot.pdf	0	30.281	-Inf	down	3.7368e-08	6.97196e-08	yes	GO:0016070(RNA metabolic process);GO:0009451(RNA modification);GO:0071704(organic substance metabolic process);GO:0005623(cell);GO:0003723(RNA binding);GO:0046483(heterocycle metabolic process);GO:0043231(intracellular membrane-bounded organelle);GO:0001522(pseudouridine synthesis);GO:0097159(organic cyclic compound binding);GO:0006139(nucleobase-containing compound metabolic process);GO:0043229(…	NA
PC-3p-127107_56	BGI_novel_T008812	2017	2038	2029	-36.6	-24.4	0.666667	12	6-13,2033-2026;14-19,2024-2019	1-5,2038-2034[UP5];x-x,2025-2025[BULt];20-21,2018-2017[UP3]	..((((((.((((((((.....&.....))))))))-))))))..	UCUGGUUCACAAGGCUCAUCUA&UCUAAGAGCCUUG-GAACCAUA	0	0	NA	NA	NA	2	60.562	2	0.955422	Output/S0h/cleaveLand_result/t_plot/PC-3p-127107_56_BGI_novel_T008812_2029_TPlot.pdf	0	60.562	-Inf	down	7.123e-15	4.42666e-14	yes	GO:0044425(membrane part);GO:0016020(membrane);GO:0016021(integral component of membrane);GO:0031224(intrinsic component of membrane)	NA
PC-3p-127107_56	BGI_novel_T008904	2588	2611	2599	-36.6	-26.3	0.718579	11	1-3,2611-2609;4-6,2604-2602;8-20,2601-2589	x-x,2608-2605[BULt];7-7,x-x[BULq];21-21,2588-2588[UP3]	.(((((((((((((-(((....(((&)))----))).))))))))))))).	GAUGGUUCCAAGGC-CUUCCCAAGA&UCU----AAGAGCCUUGGAACCAUA	4	107.302	2	0.584411	Output/S24h/cleaveLand_result/t_plot/PC-3p-127107_56_BGI_novel_T008904_2599_TPlot.pdf	3	90.843	2	0.536074	Output/S0h/cleaveLand_result/t_plot/PC-3p-127107_56_BGI_novel_T008904_2599_TPlot.pdf	107.302	90.843	0.240228	up	0.24228	0.257729	yes	NA	NA
PC-3p-127107_56	BGI_novel_T011035	938	959	950	-36.6	-24.3	0.663934	6.5	1-5,959-955;7-14,953-946;15-18,944-941	6-6,954-954[SIL];x-x,945-945[BULt];19-21,940-938[UP3]	...((((.((((((((.(((((&))))).))))))))-))))...	CGGGGUUAUCAAGGCUGUUAGA&UCUAAGAGCCUUGG-AACCAUA	1	26.8255	4	0.999978	Output/S24h/cleaveLand_result/t_plot/PC-3p-127107_56_BGI_novel_T011035_950_TPlot.pdf	0	0	NA	NA	NA	26.8255	0	Inf	up	2.2264e-07	2.56268e-07	yes	GO:1901265(nucleoside phosphate binding);GO:1901363(heterocyclic compound binding);GO:0043168(anion binding);GO:0015399(primary active transmembrane transporter activity);GO:0016462(pyrophosphatase activity);GO:0022804(active transmembrane transporter activity);GO:0005524(ATP binding);GO:0042623(ATPase activity, coupled);GO:0003824(catalytic activity);GO:0016887(ATPase activity);GO:0042910(xenobi…	ko00920(Sulfur metabolism);ko02010(ABC transporters);ko03018(RNA degradation)
PC-3p-127107_56	XM_016077050.2	1586	1605	1597	-36.6	-25.3	0.691257	6	1-9,1605-1597;11-14,1596-1593;17-21,1590-1586	10-10,x-x[BULq];15-16,1592-1591[SIL]	(((((..((((-(((((((((&))))))))).))))..)))))	UAUGGGACCGA-GCUCUUGGA&UCUAAGAGCCUUGGAACCAUA	1	26.8255	4	0.992381	Output/S24h/cleaveLand_result/t_plot/PC-3p-127107_56_XM_016077050.2_1597_TPlot.pdf	4	121.124	2	0.772885	Output/S0h/cleaveLand_result/t_plot/PC-3p-127107_56_XM_016077050.2_1597_TPlot.pdf	26.8255	121.124	-2.17481	down	8.9815e-15	5.46095e-14	yes	GO:0044237(cellular metabolic process);GO:0006099(tricarboxylic acid cycle);GO:0019752(carboxylic acid metabolic process);GO:0016740(transferase activity);GO:0072350(tricarboxylic acid metabolic process);GO:0046912(transferase activity, transferring acyl groups, acyl groups converted into alkyl on transfer);GO:0071704(organic substance metabolic process);GO:0044238(primary metabolic process);GO:0…	ko01210(2-Oxocarboxylic acid metabolism);ko00020(Citrate cycle (TCA cycle));ko01200(Carbon metabolism);ko01230(Biosynthesis of amino acids);ko01110(Biosynthesis of secondary metabolites);ko01100(Metabolic pathways);ko00630(Glyoxylate and dicarboxylate metabolism)
PC-3p-127107_56	XM_016078484.2	1117	1137	1128	-36.6	-25.9	0.70765	7	1-3,1137-1135;6-15,1132-1123;17-21,1121-1117	4-5,1134-1133[SIL];16-16,1122-1122[SIL]	(((((.((((((((((..(((&)))..)))))))))).)))))	UGUGGAUCCAAGGCUUGAAGG&UCUAAGAGCCUUGGAACCAUA	2	53.6509	3	0.258271	Output/S24h/cleaveLand_result/t_plot/PC-3p-127107_56_XM_016078484.2_1128_TPlot.pdf	0	0	NA	NA	NA	53.6509	0	Inf	up	2.3929e-13	9.82167e-13	yes	GO:0044260(cellular macromolecule metabolic process);GO:0008152(metabolic process);GO:0016740(transferase activity);GO:0032555(purine ribonucleotide binding);GO:0016773(phosphotransferase activity, alcohol group as acceptor);GO:0038023(signaling receptor activity);GO:1901363(heterocyclic compound binding);GO:0032553(ribonucleotide binding);GO:0005488(binding);GO:0043168(anion binding);GO:0004871(…	NA
PC-3p-127107_56	XM_016079164.2	2090	2110	2101	-36.6	-25.98	0.709836	8.5	1-3,2110-2108;7-21,2104-2090	4-6,2107-2105[SIL]	(((((((((((((((...(((&)))...)))))))))))))))	UAUGGUUCUAGGGCUGAAGGA&UCUAAGAGCCUUGGAACCAUA	0	0	NA	NA	NA	1	30.281	4	0.926915	Output/S0h/cleaveLand_result/t_plot/PC-3p-127107_56_XM_016079164.2_2101_TPlot.pdf	0	30.281	-Inf	down	3.7368e-08	6.97196e-08	yes	NA	ko00640(Propanoate metabolism);ko01100(Metabolic pathways);ko01110(Biosynthesis of secondary metabolites);ko01212(Fatty acid metabolism);ko00061(Fatty acid biosynthesis);ko00620(Pyruvate metabolism)
PC-3p-127107_56	XM_016081303.2	322	343	333	-36.6	-23.9	0.653005	7.5	1-3,343-341;4-17,339-326	x-x,340-340[BULt];18-21,325-322[UP3]	....((((((((((((((.(((&)))-))))))))))))))....	UCACGUUCCAAGGUUCUUCAGG&UCU-AAGAGCCUUGGAACCAUA	1	26.8255	4	1	Output/S24h/cleaveLand_result/t_plot/PC-3p-127107_56_XM_016081303.2_333_TPlot.pdf	0	0	NA	NA	NA	26.8255	0	Inf	up	2.2264e-07	2.56268e-07	yes	GO:0090304(nucleic acid metabolic process);GO:0046483(heterocycle metabolic process);GO:0034641(cellular nitrogen compound metabolic process);GO:0016740(transferase activity);GO:0016070(RNA metabolic process);GO:0006725(cellular aromatic compound metabolic process);GO:1901360(organic cyclic compound metabolic process);GO:0043412(macromolecule modification);GO:0006396(RNA processing);GO:0005488(bi…	NA
PC-3p-127107_56	XM_016085942.2	1113	1134	1125	-36.6	-23.8	0.650273	9	3-17,1132-1118;18-18,1116-1116	1-2,1134-1133[UP5];x-x,1117-1117[BULt];19-21,1115-1113[UP3]	...(.(((((((((((((((..&..)))))))))))))))-)...	UGGGUGUUCCAAGGUUCUUGUG&UCUAAGAGCCUUGGAAC-CAUA	1	26.8255	4	1	Output/S24h/cleaveLand_result/t_plot/PC-3p-127107_56_XM_016085942.2_1125_TPlot.pdf	0	0	NA	NA	NA	26.8255	0	Inf	up	2.2264e-07	2.56268e-07	yes	GO:0008152(metabolic process);GO:0016787(hydrolase activity);GO:0003824(catalytic activity)	ko01110(Biosynthesis of secondary metabolites);ko00943(Isoflavonoid biosynthesis)
PC-3p-127107_56	XM_016087059.2	1620	1641	1632	-36.6	-23.8	0.650273	9.5	1-10,1641-1632;12-18,1629-1623	11-11,1631-1630[AILt];19-21,1622-1620[UP3]	...(((((((..((((((((((&))))))))))-.)))))))...	AUGGGUUUCAUUGGCUUUUGGA&UCUAAGAGCC-UUGGAACCAUA	0	0	NA	NA	NA	1	30.281	4	1	Output/S0h/cleaveLand_result/t_plot/PC-3p-127107_56_XM_016087059.2_1632_TPlot.pdf	0	30.281	-Inf	down	3.7368e-08	6.97196e-08	yes	GO:0016021(integral component of membrane);GO:0044425(membrane part);GO:0016020(membrane);GO:0031224(intrinsic component of membrane)	ko03008(Ribosome biogenesis in eukaryotes)
PC-3p-127107_56	XM_016092749.2	455	478	469	-36.6	-23.8	0.650273	8.5	1-7,478-472;9-13,470-466;14-20,462-456	8-8,471-471[SIL];x-x,465-463[BULt];21-21,455-455[UP3]	.(((((((...(((((.(((((((&))))))).)))))---))))))).	GGUGGUUCUGUCAAGGGUUUUGGA&UCUAAGAGCCUUG---GAACCAUA	2	53.6509	3	0.800483	Output/S24h/cleaveLand_result/t_plot/PC-3p-127107_56_XM_016092749.2_469_TPlot.pdf	3	90.843	2	0.992779	Output/S0h/cleaveLand_result/t_plot/PC-3p-127107_56_XM_016092749.2_469_TPlot.pdf	53.6509	90.843	-0.759772	down	0.0019738	0.00217601	yes	GO:0032774(RNA biosynthetic process);GO:0090304(nucleic acid metabolic process);GO:1901576(organic substance biosynthetic process);GO:0034654(nucleobase-containing compound biosynthetic process);GO:0043170(macromolecule metabolic process);GO:0006139(nucleobase-containing compound metabolic process);GO:0018130(heterocycle biosynthetic process);GO:0034641(cellular nitrogen compound metabolic proces…	NA
PC-3p-127107_56	XM_016093482.2	392	418	408	-36.6	-24.6	0.672131	12	1-3,418-416;5-15,413-403;16-19,397-394	4-4,415-414[AILt];x-x,402-398[BULt];20-21,393-392[UP3]	..((((.....(((((((((((..(((&)))-.)))))))))))-----))))..	CCUGGUUCCUUUCCGAGGCUCUGAAGA&UCU-AAGAGCCUUGGA-----ACCAUA	0	0	NA	NA	NA	1	30.281	4	0.999376	Output/S0h/cleaveLand_result/t_plot/PC-3p-127107_56_XM_016093482.2_408_TPlot.pdf	0	30.281	-Inf	down	3.7368e-08	6.97196e-08	yes	GO:0008152(metabolic process);GO:0003954(NADH dehydrogenase activity);GO:0016491(oxidoreductase activity);GO:0003824(catalytic activity);GO:0050136(NADH dehydrogenase (quinone) activity);GO:0008137(NADH dehydrogenase (ubiquinone) activity);GO:0016655(oxidoreductase activity, acting on NAD(P)H, quinone or similar compound as acceptor);GO:0016651(oxidoreductase activity, acting on NAD(P)H);GO:00551…	ko01100(Metabolic pathways);ko00190(Oxidative phosphorylation)
PC-3p-127107_56	XM_016096779.2	963	986	977	-36.6	-28.32	0.77377	8.5	2-14,985-973;17-20,967-964	1-1,986-986[UP5];15-16,972-968[AILt];21-21,963-963[UP3]	.((((.....(((((((((((((.&.)))))))))))))---..)))).	AGUGGGAAUGCCAGGGCUCUUAGG&UCUAAGAGCCUUGG---AACCAUA	1	26.8255	4	0.426464	Output/S24h/cleaveLand_result/t_plot/PC-3p-127107_56_XM_016096779.2_977_TPlot.pdf	0	0	NA	NA	NA	26.8255	0	Inf	up	2.2264e-07	2.56268e-07	yes	GO:0032555(purine ribonucleotide binding);GO:0005488(binding);GO:0017076(purine nucleotide binding);GO:0043168(anion binding);GO:0043167(ion binding);GO:0097367(carbohydrate derivative binding);GO:0005524(ATP binding);GO:0035639(purine ribonucleoside triphosphate binding);GO:0032559(adenyl ribonucleotide binding);GO:0036094(small molecule binding);GO:0030554(adenyl nucleotide binding);GO:0032553(…	ko04141(Protein processing in endoplasmic reticulum);ko04144(Endocytosis);ko03040(Spliceosome)
PC-3p-127107_56	XM_016097946.2	1253	1274	1264	-36.6	-24.2	0.661202	9	1-4,1274-1271;7-9,1268-1266;10-18,1264-1256	5-6,1270-1269[SIL];x-x,1265-1265[BULt];19-21,1255-1253[UP3]	...(((((((((.(((..((((&))))..)))-)))))))))...	GCAGGUUCCAAGUGCUAGUAGA&UCUAAGAGC-CUUGGAACCAUA	0	0	NA	NA	NA	1	30.281	4	0.999962	Output/S0h/cleaveLand_result/t_plot/PC-3p-127107_56_XM_016097946.2_1264_TPlot.pdf	0	30.281	-Inf	down	3.7368e-08	6.97196e-08	yes	GO:0009396(folic acid-containing compound biosynthetic process);GO:0044249(cellular biosynthetic process);GO:0046394(carboxylic acid biosynthetic process);GO:0019752(carboxylic acid metabolic process);GO:0018130(heterocycle biosynthetic process);GO:0006575(cellular modified amino acid metabolic process);GO:0051186(cofactor metabolic process);GO:0043603(cellular amide metabolic process);GO:0051188…	ko00790(Folate biosynthesis)
PC-3p-127107_56	XM_016102639.1	966	991	982	-36.6	-25.5	0.696721	14	1-11,991-981;12-17,976-971;18-19,969-968	x-x,980-977[BULt];x-x,970-970[BULt];20-21,967-966[UP3]	..((.((((((....(((((((((((&)))))))))))----))))))-))..	CUUGUGUUCCGGCGGGGGCUCUUGGA&UCUAAGAGCCU----UGGAAC-CAUA	2	53.6509	3	0.347416	Output/S24h/cleaveLand_result/t_plot/PC-3p-127107_56_XM_016102639.1_982_TPlot.pdf	0	0	NA	NA	NA	53.6509	0	Inf	up	2.3929e-13	9.82167e-13	yes	NA	ko04016(MAPK signaling pathway - plant);ko04626(Plant-pathogen interaction)
PC-3p-127107_56	XM_016103236.2	670	690	681	-36.6	-24.4	0.666667	15	8-20,683-671	1-7,690-684[UP5];21-21,670-670[UP3]	.(((((((((((((.......&.......))))))))))))).	CAUGGUUCCGAGGCGGAUCCG&UCUAAGAGCCUUGGAACCAUA	0	0	NA	NA	NA	1	30.281	4	0.999864	Output/S0h/cleaveLand_result/t_plot/PC-3p-127107_56_XM_016103236.2_681_TPlot.pdf	0	30.281	-Inf	down	3.7368e-08	6.97196e-08	yes	NA	NA
PC-3p-127107_56	XM_016104137.2	545	566	556	-36.6	-24.3	0.663934	7	1-7,566-560;9-9,558-558;10-18,556-548	8-8,559-559[SIL];x-x,557-557[BULt];19-21,547-545[UP3]	...(((((((((.(.(((((((&))))))).)-)))))))))...	CAGGGUUCCAAGAGAUCUUAGA&UCUAAGAGC-CUUGGAACCAUA	5	134.127	3	0.66869	Output/S24h/cleaveLand_result/t_plot/PC-3p-127107_56_XM_016104137.2_556_TPlot.pdf	18	545.058	3	0.618633	Output/S0h/cleaveLand_result/t_plot/PC-3p-127107_56_XM_016104137.2_556_TPlot.pdf	134.127	545.058	-2.02281	down	4.9577e-56	5.00986e-54	yes	GO:0050896(response to stimulus)	NA
PC-3p-127107_56	XM_016104195.2	386	408	397	-36.6	-27.4	0.748634	6	2-3,407-406;4-8,404-400;9-20,398-387	1-1,408-408[UP5];x-x,405-405[BULt];x-x,399-399[BULt];21-21,386-386[UP3]	.((((((((((((.(((((.((.&.))-)))))-)))))))))))).	GAUGGUUCCAAGGCCUCUUCAGC&UCU-AAGAG-CCUUGGAACCAUA	0	0	NA	NA	NA	1	30.281	4	0.726619	Output/S0h/cleaveLand_result/t_plot/PC-3p-127107_56_XM_016104195.2_397_TPlot.pdf	0	30.281	-Inf	down	3.7368e-08	6.97196e-08	yes	GO:0050896(response to stimulus)	NA
PC-3p-127107_56	XM_016105830.2	1227	1250	1240	-36.6	-24.2	0.661202	10	2-6,1249-1245;7-11,1243-1239;12-18,1236-1230	1-1,1250-1250[UP5];x-x,1244-1244[BULt];x-x,1238-1237[BULt];19-21,1229-1227[UP3]	...(((((((..(((((.(((((.&.)))))-)))))--)))))))...	UGCGGUUCCAAAAGGCUACUUAGC&UCUAAG-AGCCU--UGGAACCAUA	1	26.8255	4	0.999992	Output/S24h/cleaveLand_result/t_plot/PC-3p-127107_56_XM_016105830.2_1240_TPlot.pdf	0	0	NA	NA	NA	26.8255	0	Inf	up	2.2264e-07	2.56268e-07	yes	GO:0009719(response to endogenous stimulus);GO:0050896(response to stimulus);GO:0009725(response to hormone);GO:0009733(response to auxin);GO:0042221(response to chemical);GO:0010033(response to organic substance)	ko04075(Plant hormone signal transduction)
PC-3p-127107_56	XM_016107944.2	852	874	863	-36.6	-24	0.655738	8	1-2,874-873;4-9,871-866;10-20,863-853	3-3,872-872[SIL];x-x,865-864[BULt];21-21,852-852[UP3]	.(((((((((((..((((((.((&)).))))))--))))))))))).	CGUGGUUCUAAGUAGCUCUUUGA&UCUAAGAGC--CUUGGAACCAUA	0	0	NA	NA	NA	1	30.281	4	0.999995	Output/S0h/cleaveLand_result/t_plot/PC-3p-127107_56_XM_016107944.2_863_TPlot.pdf	0	30.281	-Inf	down	3.7368e-08	6.97196e-08	yes	GO:0003824(catalytic activity);GO:0016787(hydrolase activity)	NA
PC-3p-127107_56	XM_016109206.2	383	403	394	-36.6	-24.1	0.65847	14	7-18,397-386	1-6,403-398[UP5];19-21,385-383[UP3]	...((((((((((((......&......))))))))))))...	GGAGGUUCCAAGGCUGGGAAA&UCUAAGAGCCUUGGAACCAUA	1	26.8255	4	0.999998	Output/S24h/cleaveLand_result/t_plot/PC-3p-127107_56_XM_016109206.2_394_TPlot.pdf	0	0	NA	NA	NA	26.8255	0	Inf	up	2.2264e-07	2.56268e-07	yes	GO:0016747(transferase activity, transferring acyl groups other than amino-acyl groups);GO:0016740(transferase activity);GO:0008152(metabolic process);GO:0003824(catalytic activity);GO:0009058(biosynthetic process);GO:0016746(transferase activity, transferring acyl groups)	ko01110(Biosynthesis of secondary metabolites);ko01100(Metabolic pathways);ko04712(Circadian rhythm - plant);ko00941(Flavonoid biosynthesis)
PC-3p-127107_56	XM_016112192.2	474	494	485	-36.6	-25.1	0.685792	14	8-20,487-475	1-7,494-488[UP5];21-21,474-474[UP3]	.(((((((((((((.......&.......))))))))))))).	GAUGGUUCCAAGGCAACAGGU&UCUAAGAGCCUUGGAACCAUA	0	0	NA	NA	NA	1	30.281	4	0.995224	Output/S0h/cleaveLand_result/t_plot/PC-3p-127107_56_XM_016112192.2_485_TPlot.pdf	0	30.281	-Inf	down	3.7368e-08	6.97196e-08	yes	GO:0016051(carbohydrate biosynthetic process);GO:1901576(organic substance biosynthetic process);GO:0044042(glucan metabolic process);GO:0008152(metabolic process);GO:0044422(organelle part);GO:0043170(macromolecule metabolic process);GO:0016868(intramolecular transferase activity, phosphotransferases);GO:0005622(intracellular);GO:0009629(response to gravity);GO:0009590(detection of gravity);GO:0…	ko00500(Starch and sucrose metabolism);ko00230(Purine metabolism);ko00010(Glycolysis / Gluconeogenesis);ko01100(Metabolic pathways);ko01110(Biosynthesis of secondary metabolites);ko00030(Pentose phosphate pathway);ko00520(Amino sugar and nucleotide sugar metabolism);ko00052(Galactose metabolism)
PC-3p-127107_56	XM_016112488.2	808	828	820	-36.6	-23.9	0.653005	5.5	1-4,828-825;6-15,824-815;16-21,813-808	5-5,x-x[BULq];x-x,814-814[BULt]	((((((.((((((((((-((((&)))).))))))))))-))))))	UAUGGUGUUCAAGGUUC-UGGA&UCUAAGAGCCUUGGA-ACCAUA	0	0	NA	NA	NA	1	30.281	4	0.999998	Output/S0h/cleaveLand_result/t_plot/PC-3p-127107_56_XM_016112488.2_820_TPlot.pdf	0	30.281	-Inf	down	3.7368e-08	6.97196e-08	yes	GO:0043226(organelle);GO:1901360(organic cyclic compound metabolic process);GO:0043170(macromolecule metabolic process);GO:0036094(small molecule binding);GO:0097159(organic cyclic compound binding);GO:0005488(binding);GO:0050794(regulation of cellular process);GO:0016070(RNA metabolic process);GO:0044238(primary metabolic process);GO:1901363(heterocyclic compound binding);GO:0044260(cellular mac…	NA
PC-3p-127107_56	XM_016113026.2	1355	1376	1366	-36.6	-24.2	0.661202	7	1-8,1376-1369;9-16,1367-1360	x-x,1368-1368[BULt];17-21,1359-1355[UP3]	.....((((((((.((((((((&))))))))-)))))))).....	AGCUAUUCCAAGGACUCUUAGA&UCUAAGAG-CCUUGGAACCAUA	0	0	NA	NA	NA	1	30.281	4	0.999976	Output/S0h/cleaveLand_result/t_plot/PC-3p-127107_56_XM_016113026.2_1366_TPlot.pdf	0	30.281	-Inf	down	3.7368e-08	6.97196e-08	yes	GO:0016070(RNA metabolic process);GO:0009451(RNA modification);GO:0071704(organic substance metabolic process);GO:0005623(cell);GO:0003723(RNA binding);GO:0046483(heterocycle metabolic process);GO:0043231(intracellular membrane-bounded organelle);GO:0001522(pseudouridine synthesis);GO:0097159(organic cyclic compound binding);GO:0006139(nucleobase-containing compound metabolic process);GO:0043229(…	NA
PC-3p-127107_56	XM_016114429.2	175	196	187	-36.6	-24.3	0.663934	8	1-3,196-194;6-9,192-189;10-10,187-187;11-21,185-175	4-5,193-193[AILq];x-x,188-188[BULt];x-x,186-186[BULt]	(((((((((((.(.((((.-(((&)))..))))-)-)))))))))))	UAUGGUUCCAACGAGCUCG-AGA&UCUAAGAGC-C-UUGGAACCAUA	0	0	NA	NA	NA	1	30.281	4	0.999948	Output/S0h/cleaveLand_result/t_plot/PC-3p-127107_56_XM_016114429.2_187_TPlot.pdf	0	30.281	-Inf	down	3.7368e-08	6.97196e-08	yes	GO:0005524(ATP binding);GO:0032553(ribonucleotide binding);GO:0043167(ion binding);GO:1901265(nucleoside phosphate binding);GO:0000166(nucleotide binding);GO:0043169(cation binding);GO:0003824(catalytic activity);GO:0043168(anion binding);GO:0016787(hydrolase activity);GO:0016020(membrane);GO:0035639(purine ribonucleoside triphosphate binding);GO:0032559(adenyl ribonucleotide binding);GO:0031224(…	NA
PC-3p-127107_56	XM_016116574.2	559	586	577	-36.6	-23.8	0.650273	10.5	1-4,586-583;6-14,581-573;15-21,565-559	5-5,582-582[SIL];x-x,572-566[BULt]	(((((((.......(((((((((.((((&)))).)))))))))-------)))))))	UGUGGUUUUGGAAGCCAAGGUUCAUAGA&UCUAAGAGCCUUGG-------AACCAUA	3	80.4764	2	0.996342	Output/S24h/cleaveLand_result/t_plot/PC-3p-127107_56_XM_016116574.2_577_TPlot.pdf	0	0	NA	NA	NA	80.4764	0	Inf	up	2.9371e-19	3.092e-18	yes	GO:1901071(glucosamine-containing compound metabolic process);GO:0006022(aminoglycan metabolic process);GO:0009057(macromolecule catabolic process);GO:0003824(catalytic activity);GO:0008152(metabolic process);GO:1901136(carbohydrate derivative catabolic process);GO:0006026(aminoglycan catabolic process);GO:0006030(chitin metabolic process);GO:0016798(hydrolase activity, acting on glycosyl bonds);…	ko01100(Metabolic pathways);ko00520(Amino sugar and nucleotide sugar metabolism)
PC-3p-127107_56	XM_016116888.2	2437	2460	2448	-36.6	-26.3	0.718579	11	1-3,2460-2458;4-6,2453-2451;8-20,2450-2438	x-x,2457-2454[BULt];7-7,x-x[BULq];21-21,2437-2437[UP3]	.(((((((((((((-(((....(((&)))----))).))))))))))))).	GAUGGUUCCAAGGC-CUUCCCAAGA&UCU----AAGAGCCUUGGAACCAUA	2	53.6509	2	0.595215	Output/S24h/cleaveLand_result/t_plot/PC-3p-127107_56_XM_016116888.2_2448_TPlot.pdf	2	60.562	2	0.546641	Output/S0h/cleaveLand_result/t_plot/PC-3p-127107_56_XM_016116888.2_2448_TPlot.pdf	53.6509	60.562	-0.17481	down	0.51783	0.542462	yes	NA	NA
PC-3p-127107_56	XM_021125442.1	590	612	602	-36.6	-24.6	0.672131	8	1-2,612-611;3-16,609-596;17-18,594-593	x-x,610-610[BULt];x-x,595-595[BULt];19-21,592-590[UP3]	...((.((((((((((((((.((&))-))))))))))))))-))...	UAAGGUUUCCAAGGUUCUUGUGA&UC-UAAGAGCCUUGGAA-CCAUA	0	0	NA	NA	NA	1	30.281	4	0.999478	Output/S0h/cleaveLand_result/t_plot/PC-3p-127107_56_XM_021125442.1_602_TPlot.pdf	0	30.281	-Inf	down	3.7368e-08	6.97196e-08	yes	GO:0006351(transcription, DNA-templated);GO:0071704(organic substance metabolic process);GO:0009058(biosynthetic process);GO:0043226(organelle);GO:0034654(nucleobase-containing compound biosynthetic process);GO:0032774(RNA biosynthetic process);GO:0003700(DNA binding transcription factor activity);GO:0043229(intracellular organelle);GO:0006725(cellular aromatic compound metabolic process);GO:0009…	ko04626(Plant-pathogen interaction);ko04016(MAPK signaling pathway - plant)
PC-3p-127107_56	XM_021140420.1	689	712	701	-36.6	-24.98	0.682514	12	1-4,712-709;7-10,704-701;11-20,699-690	5-6,708-705[AILt];x-x,700-700[BULt];21-21,689-689[UP3]	.((((((((((.((((....((((&))))--..))))-)))))))))).	GAUGGUUCCAAGGGCUGAGGUGGA&UCUA--AGAGCC-UUGGAACCAUA	4	107.302	2	0.89621	Output/S24h/cleaveLand_result/t_plot/PC-3p-127107_56_XM_021140420.1_701_TPlot.pdf	0	0	NA	NA	NA	107.302	0	Inf	up	3.8116e-25	8.17156e-24	yes	NA	NA
PC-3p-127107_56	XM_021141676.1	1167	1188	1179	-36.6	-25.8	0.704918	10	1-10,1188-1179;13-19,1175-1169	11-12,1178-1176[AILt];20-21,1168-1167[UP3]	..(((((((...((((((((((&))))))))))-..)))))))..	AUUGGUUCCUCUGGUUCUUGGA&UCUAAGAGCC-UUGGAACCAUA	1	26.8255	4	0.95858	Output/S24h/cleaveLand_result/t_plot/PC-3p-127107_56_XM_021141676.1_1179_TPlot.pdf	0	0	NA	NA	NA	26.8255	0	Inf	up	2.2264e-07	2.56268e-07	yes	GO:0070011(peptidase activity, acting on L-amino acid peptides);GO:0009987(cellular process);GO:0005737(cytoplasm);GO:0015833(peptide transport);GO:0033036(macromolecule localization);GO:0016787(hydrolase activity);GO:0008152(metabolic process);GO:0019538(protein metabolic process);GO:0061919(process utilizing autophagic mechanism);GO:0008233(peptidase activity);GO:0071705(nitrogen compound trans…	ko04136(Autophagy - other)
PC-3p-127107_56	XM_021141881.1	1540	1564	1554	-36.6	-23.9	0.653005	7.5	1-3,1564-1562;4-14,1560-1550;15-20,1546-1541	x-x,1561-1561[BULt];x-x,1549-1547[BULt];21-21,1540-1540[UP3]	.((((((...(((((((((((.(((&)))-)))))))))))---)))))).	GAUGGUUUUGCUGAGGCUCUUGAGA&UCU-AAGAGCCUUGG---AACCAUA	1	26.8255	4	1	Output/S24h/cleaveLand_result/t_plot/PC-3p-127107_56_XM_021141881.1_1554_TPlot.pdf	0	0	NA	NA	NA	26.8255	0	Inf	up	2.2264e-07	2.56268e-07	yes	GO:0030312(external encapsulating structure);GO:0046556(alpha-L-arabinofuranosidase activity);GO:0044424(intracellular part);GO:0071704(organic substance metabolic process);GO:0016020(membrane);GO:0043226(organelle);GO:0016787(hydrolase activity);GO:0016052(carbohydrate catabolic process);GO:0003824(catalytic activity);GO:0044238(primary metabolic process);GO:0000272(polysaccharide catabolic proc…	ko01100(Metabolic pathways);ko00520(Amino sugar and nucleotide sugar metabolism)
PC-3p-127107_56	XM_021143610.1	731	751	743	-36.6	-23.9	0.653005	5.5	1-4,751-748;6-15,747-738;16-21,736-731	5-5,x-x[BULq];x-x,737-737[BULt]	((((((.((((((((((-((((&)))).))))))))))-))))))	UAUGGUGUUCAAGGUUC-UGGA&UCUAAGAGCCUUGGA-ACCAUA	1	26.8255	4	1	Output/S24h/cleaveLand_result/t_plot/PC-3p-127107_56_XM_021143610.1_743_TPlot.pdf	0	0	NA	NA	NA	26.8255	0	Inf	up	2.2264e-07	2.56268e-07	yes	GO:0043226(organelle);GO:1901360(organic cyclic compound metabolic process);GO:0043170(macromolecule metabolic process);GO:0036094(small molecule binding);GO:0097159(organic cyclic compound binding);GO:0005488(binding);GO:0050794(regulation of cellular process);GO:0016070(RNA metabolic process);GO:0044238(primary metabolic process);GO:1901363(heterocyclic compound binding);GO:0044260(cellular mac…	NA
PC-3p-12725_949	BGI_novel_T000598	585	611	597	-39.4	-25.7	0.652284	16	3-7,609-605;8-19,599-588;20-21,586-585	1-2,611-610[UP5];x-x,604-600[BULt];x-x,587-587[BULt]	((.((((((((((((.....(((((..&..)))))-----))))))))))))-))	GACGAGAUCAAGUUGGUCUAGCGGGUC&UUCCCGU-----CGACUUGAUCUC-UC	0	0	NA	NA	NA	1	30.281	4	0.999948	Output/S0h/cleaveLand_result/t_plot/PC-3p-12725_949_BGI_novel_T000598_597_TPlot.pdf	0	30.281	-Inf	down	3.7368e-08	6.97196e-08	yes	GO:1901363(heterocyclic compound binding);GO:0005488(binding);GO:0097159(organic cyclic compound binding);GO:0003677(DNA binding);GO:0003676(nucleic acid binding)	ko04144(Endocytosis)
PC-3p-12725_949	BGI_novel_T000599	484	510	496	-39.4	-25.7	0.652284	16	3-7,508-504;8-19,498-487;20-21,485-484	1-2,510-509[UP5];x-x,503-499[BULt];x-x,486-486[BULt]	((.((((((((((((.....(((((..&..)))))-----))))))))))))-))	GACGAGAUCAAGUUGGUCUAGCGGGUC&UUCCCGU-----CGACUUGAUCUC-UC	0	0	NA	NA	NA	1	30.281	4	0.999958	Output/S0h/cleaveLand_result/t_plot/PC-3p-12725_949_BGI_novel_T000599_496_TPlot.pdf	0	30.281	-Inf	down	3.7368e-08	6.97196e-08	yes	GO:1901363(heterocyclic compound binding);GO:0005488(binding);GO:0097159(organic cyclic compound binding);GO:0003677(DNA binding);GO:0003676(nucleic acid binding)	ko04144(Endocytosis)
PC-3p-12725_949	BGI_novel_T003024	1029	1050	1042	-39.4	-29.3	0.743655	6	1-9,1050-1042;11-18,1041-1034;19-21,1031-1029	10-10,x-x[BULq];x-x,1033-1032[BULt]	(((..((((((((-(((((((((&))))))))).))))))))--)))	GAGGUGGAUCAAG-CGGCGGGAG&UUCCCGUCGACUUGAUCU--CUC	1	26.8255	4	0.315486	Output/S24h/cleaveLand_result/t_plot/PC-3p-12725_949_BGI_novel_T003024_1042_TPlot.pdf	0	0	NA	NA	NA	26.8255	0	Inf	up	2.2264e-07	2.56268e-07	yes	GO:0097159(organic cyclic compound binding);GO:0003676(nucleic acid binding);GO:0003723(RNA binding);GO:0005488(binding);GO:0036094(small molecule binding);GO:1901363(heterocyclic compound binding);GO:0000166(nucleotide binding);GO:1901265(nucleoside phosphate binding)	ko03040(Spliceosome)
PC-3p-12725_949	BGI_novel_T004344	908	932	923	-39.4	-25.8	0.654822	10.5	2-5,931-928;7-12,926-921;13-18,918-913;19-21,910-908	1-1,932-932[UP5];6-6,927-927[SIL];x-x,920-919[BULt];x-x,912-911[BULt]	(((..((((((..((((((.((((.&.)))).))))))--))))))--)))	GAGCAAGAUCGCUGGUCGAGGGGAC&UUCCCGUCGACU--UGAUCU--CUC	1	26.8255	4	0.999977	Output/S24h/cleaveLand_result/t_plot/PC-3p-12725_949_BGI_novel_T004344_923_TPlot.pdf	0	0	NA	NA	NA	26.8255	0	Inf	up	2.2264e-07	2.56268e-07	yes	GO:0008135(translation factor activity, RNA binding);GO:0097159(organic cyclic compound binding);GO:0003723(RNA binding);GO:1901363(heterocyclic compound binding);GO:0003676(nucleic acid binding);GO:0003743(translation initiation factor activity);GO:0005488(binding)	ko04144(Endocytosis)
PC-3p-12725_949	BGI_novel_T006926	2381	2400	2392	-39.4	-30.5	0.774112	5.5	1-9,2400-2392;11-12,2391-2390;14-21,2388-2381	10-10,x-x[BULq];13-13,2389-2389[SIL]	((((((((.((-(((((((((&))))))))).)).))))))))	GAGGGAUCCGG-CGACGGGGA&UUCCCGUCGACUUGAUCUCUC	1	26.8255	4	0.0730071	Output/S24h/cleaveLand_result/t_plot/PC-3p-12725_949_BGI_novel_T006926_2392_TPlot.pdf	0	0	NA	NA	NA	26.8255	0	Inf	up	2.2264e-07	2.56268e-07	yes	GO:0097159(organic cyclic compound binding);GO:0003676(nucleic acid binding);GO:1901363(heterocyclic compound binding);GO:0005488(binding)	ko02010(ABC transporters)
PC-3p-12725_949	BGI_novel_T011979	1148	1169	1159	-39.4	-26.1	0.662437	8	1-4,1169-1166;6-8,1163-1161;11-21,1158-1148	5-5,1165-1164[AILt];9-10,1160-1159[SIL]	(((((((((((..(((..((((&))))-.)))..)))))))))))	GAGAGAUCAAGAAGACUUGGAA&UUCC-CGUCGACUUGAUCUCUC	1	26.8255	4	0.999832	Output/S24h/cleaveLand_result/t_plot/PC-3p-12725_949_BGI_novel_T011979_1159_TPlot.pdf	0	0	NA	NA	NA	26.8255	0	Inf	up	2.2264e-07	2.56268e-07	yes	NA	ko00052(Galactose metabolism)
PC-3p-12725_949	XM_016078066.2	984	1004	995	-39.4	-26.2	0.664975	8	2-4,1003-1001;5-8,999-996;10-21,995-984	1-1,1004-1004[UP5];x-x,1000-1000[BULt];9-9,x-x[BULq]	((((((((((((-((((.(((.&.)))-)))).))))))))))))	GAGGGGUCAGGU-GAUGAGGAC&UUCC-CGUCGACUUGAUCUCUC	1	26.8255	4	0.999651	Output/S24h/cleaveLand_result/t_plot/PC-3p-12725_949_XM_016078066.2_995_TPlot.pdf	0	0	NA	NA	NA	26.8255	0	Inf	up	2.2264e-07	2.56268e-07	yes	GO:0043168(anion binding);GO:0046872(metal ion binding);GO:0044434(chloroplast part);GO:0097367(carbohydrate derivative binding);GO:0009408(response to heat);GO:0043227(membrane-bounded organelle);GO:0009628(response to abiotic stimulus);GO:0031975(envelope);GO:0005488(binding);GO:0017076(purine nucleotide binding);GO:0005515(protein binding);GO:0031072(heat shock protein binding);GO:0005524(ATP …	NA
PC-3p-12725_949	XM_016087288.2	588	607	598	-39.4	-27	0.685279	7.5	1-5,607-603;7-8,601-600;11-14,597-594;16-21,593-588	6-6,602-602[SIL];9-10,599-598[SIL];15-15,x-x[BULq]	((((((-((((..((.(((((&))))).))..)))).))))))	GAGAGA-CAAGGAGAGGGGAG&UUCCCGUCGACUUGAUCUCUC	1	26.8255	4	0.983323	Output/S24h/cleaveLand_result/t_plot/PC-3p-12725_949_XM_016087288.2_598_TPlot.pdf	0	0	NA	NA	NA	26.8255	0	Inf	up	2.2264e-07	2.56268e-07	yes	NA	ko01200(Carbon metabolism);ko00010(Glycolysis / Gluconeogenesis);ko01100(Metabolic pathways);ko00030(Pentose phosphate pathway)
PC-3p-12725_949	XM_016089688.2	2166	2188	2178	-39.4	-27.2	0.690355	7	1-7,2188-2182;8-10,2180-2178;11-13,2176-2174;16-21,2171-2166	x-x,2181-2181[BULt];x-x,2177-2177[BULt];14-15,2173-2172[SIL]	((((((..(((.(((.(((((((&)))))))-)))-)))..))))))	GGGAGAGAGAGCUCGAACGGGAA&UUCCCGU-CGA-CUUGAUCUCUC	1	26.8255	4	0.95752	Output/S24h/cleaveLand_result/t_plot/PC-3p-12725_949_XM_016089688.2_2178_TPlot.pdf	0	0	NA	NA	NA	26.8255	0	Inf	up	2.2264e-07	2.56268e-07	yes	GO:0005488(binding);GO:0097159(organic cyclic compound binding);GO:0043168(anion binding);GO:1901265(nucleoside phosphate binding);GO:0017111(nucleoside-triphosphatase activity);GO:0016787(hydrolase activity);GO:0016462(pyrophosphatase activity);GO:0030554(adenyl nucleotide binding);GO:1901363(heterocyclic compound binding);GO:0003824(catalytic activity);GO:0035639(purine ribonucleoside triphosph…	NA
PC-3p-12725_949	XM_016090820.2	628	657	648	-39.4	-27.2	0.690355	22.5	1-5,657-653;7-12,651-646;13-21,636-628	6-6,652-652[SIL];x-x,645-637[BULt]	(((((((((.........((((((.(((((&))))).))))))---------)))))))))	GGGAGAUCACACCAUCAUGGUCGGAGGGAA&UUCCCGUCGACU---------UGAUCUCUC	1	26.8255	4	0.937941	Output/S24h/cleaveLand_result/t_plot/PC-3p-12725_949_XM_016090820.2_648_TPlot.pdf	0	0	NA	NA	NA	26.8255	0	Inf	up	2.2264e-07	2.56268e-07	yes	GO:0003824(catalytic activity);GO:0044260(cellular macromolecule metabolic process);GO:0043169(cation binding);GO:0043170(macromolecule metabolic process);GO:0009056(catabolic process);GO:0032446(protein modification by small protein conjugation);GO:0008152(metabolic process);GO:0036211(protein modification process);GO:0071704(organic substance metabolic process);GO:0051603(proteolysis involved i…	NA
PC-3p-12725_949	XM_016093893.2	1133	1155	1145	-39.4	-27.1	0.687817	7.5	2-6,1154-1150;8-8,1148-1148;9-12,1146-1143;13-21,1141-1133	1-1,1155-1155[UP5];7-7,1149-1149[SIL];x-x,1147-1147[BULt];x-x,1142-1142[BULt]	(((((((((.((((.(.(((((.&.))))).)-))))-)))))))))	GAGAGGUCAGAGUCUGCCGGGAG&UUCCCGUC-GACU-UGAUCUCUC	0	0	NA	NA	NA	1	30.281	4	0.945351	Output/S0h/cleaveLand_result/t_plot/PC-3p-12725_949_XM_016093893.2_1145_TPlot.pdf	0	30.281	-Inf	down	3.7368e-08	6.97196e-08	yes	GO:0043170(macromolecule metabolic process);GO:0003824(catalytic activity);GO:0035639(purine ribonucleoside triphosphate binding);GO:0006464(cellular protein modification process);GO:0043167(ion binding);GO:0065007(biological regulation);GO:0036094(small molecule binding);GO:0004672(protein kinase activity);GO:0023052(signaling);GO:0051716(cellular response to stimulus);GO:0005524(ATP binding);GO…	NA
PC-3p-12725_949	XM_016094772.2	692	711	703	-39.4	-28.3	0.718274	6	3-8,709-704;10-20,703-693	1-2,711-710[UP5];9-9,x-x[BULq];21-21,692-692[UP3]	.(((((((((((-((((((..&..)))))).))))))))))).	AAGAGAUCAAGU-GACGGGCA&UUCCCGUCGACUUGAUCUCUC	0	0	NA	NA	NA	1	30.281	4	0.488703	Output/S0h/cleaveLand_result/t_plot/PC-3p-12725_949_XM_016094772.2_703_TPlot.pdf	0	30.281	-Inf	down	3.7368e-08	6.97196e-08	yes	GO:0031326(regulation of cellular biosynthetic process);GO:0031323(regulation of cellular metabolic process);GO:0051252(regulation of RNA metabolic process);GO:0043169(cation binding);GO:1903506(regulation of nucleic acid-templated transcription);GO:0006355(regulation of transcription, DNA-templated);GO:0050789(regulation of biological process);GO:0043167(ion binding);GO:0010468(regulation of gen…	NA
PC-3p-12725_949	XM_016096771.2	1252	1273	1264	-39.4	-27.9	0.708122	6	1-13,1273-1261;15-17,1259-1257;18-21,1255-1252	14-14,1260-1260[SIL];x-x,1256-1256[BULt]	((((.(((.(((((((((((((&))))))))))))).)))-))))	GGGAUGAUGGGGUUGAUGGGAA&UUCCCGUCGACUUGAUC-UCUC	1	26.8255	4	0.737971	Output/S24h/cleaveLand_result/t_plot/PC-3p-12725_949_XM_016096771.2_1264_TPlot.pdf	1	30.281	4	0.694281	Output/S0h/cleaveLand_result/t_plot/PC-3p-12725_949_XM_016096771.2_1264_TPlot.pdf	26.8255	30.281	-0.17481	down	0.64747	0.647871	yes	GO:0044260(cellular macromolecule metabolic process);GO:0006470(protein dephosphorylation);GO:1901564(organonitrogen compound metabolic process);GO:0006807(nitrogen compound metabolic process);GO:0008152(metabolic process);GO:0006796(phosphate-containing compound metabolic process);GO:0016787(hydrolase activity);GO:0009987(cellular process);GO:0044237(cellular metabolic process);GO:0044238(primar…	NA
PC-3p-12725_949	XM_016097625.2	1028	1049	1041	-39.4	-29.3	0.743655	6	1-9,1049-1041;11-18,1040-1033;19-21,1030-1028	10-10,x-x[BULq];x-x,1032-1031[BULt]	(((..((((((((-(((((((((&))))))))).))))))))--)))	GAGGUGGAUCAAG-CGGCGGGAG&UUCCCGUCGACUUGAUCU--CUC	0	0	NA	NA	NA	1	30.281	4	0.300761	Output/S0h/cleaveLand_result/t_plot/PC-3p-12725_949_XM_016097625.2_1041_TPlot.pdf	0	30.281	-Inf	down	3.7368e-08	6.97196e-08	yes	GO:0097159(organic cyclic compound binding);GO:0003676(nucleic acid binding);GO:0003723(RNA binding);GO:0005488(binding);GO:0036094(small molecule binding);GO:1901363(heterocyclic compound binding);GO:0000166(nucleotide binding);GO:1901265(nucleoside phosphate binding)	ko03040(Spliceosome)
PC-3p-12725_949	XM_016097651.2	301	321	312	-39.4	-26.7	0.677665	8.5	2-8,320-314;11-20,311-302	1-1,321-321[UP5];9-10,313-312[SIL];21-21,301-301[UP3]	.((((((((((..(((((((.&.)))))))..)))))))))).	UGGGGGUCAAGAAGAUGGGAU&UUCCCGUCGACUUGAUCUCUC	0	0	NA	NA	NA	1	30.281	4	0.993169	Output/S0h/cleaveLand_result/t_plot/PC-3p-12725_949_XM_016097651.2_312_TPlot.pdf	0	30.281	-Inf	down	3.7368e-08	6.97196e-08	yes	GO:0003824(catalytic activity);GO:0042578(phosphoric ester hydrolase activity);GO:0016788(hydrolase activity, acting on ester bonds);GO:0016787(hydrolase activity)	ko03440(Homologous recombination);ko04712(Circadian rhythm - plant);ko03010(Ribosome)
PC-3p-12725_949	XM_016098671.2	134	158	149	-39.4	-27.3	0.692893	9	1-5,158-154;7-11,152-148;12-15,145-142;16-21,139-134	6-6,153-153[SIL];x-x,147-146[BULt];x-x,141-140[BULt]	((((((..((((..(((((.(((((&))))).)))))--))))--))))))	GAGAGAAAUCAGAUGUCGAGGGGAA&UUCCCGUCGAC--UUGA--UCUCUC	1	26.8255	4	0.934724	Output/S24h/cleaveLand_result/t_plot/PC-3p-12725_949_XM_016098671.2_149_TPlot.pdf	2	60.562	2	0.563721	Output/S0h/cleaveLand_result/t_plot/PC-3p-12725_949_XM_016098671.2_149_TPlot.pdf	26.8255	60.562	-1.17481	down	0.00030739	0.000341326	yes	GO:0016021(integral component of membrane);GO:0031224(intrinsic component of membrane);GO:0044425(membrane part);GO:0016020(membrane)	NA
PC-3p-12725_949	XM_016100475.2	589	610	601	-39.4	-27.6	0.700508	7.5	1-8,610-603;10-12,601-599;13-20,597-590	9-9,602-602[SIL];x-x,598-598[BULt];21-21,589-589[UP3]	.((((((((.(((.((((((((&)))))))).)))-)))))))).	UAGAGGUCACAGUGGAUGGGGA&UUCCCGUCGACU-UGAUCUCUC	0	0	NA	NA	NA	4	121.124	2	0.495177	Output/S0h/cleaveLand_result/t_plot/PC-3p-12725_949_XM_016100475.2_601_TPlot.pdf	0	121.124	-Inf	down	3.5765e-28	1.04348e-26	yes	GO:0044042(glucan metabolic process);GO:0008270(zinc ion binding);GO:0016740(transferase activity);GO:0033692(cellular polysaccharide biosynthetic process);GO:0071554(cell wall organization or biogenesis);GO:0043170(macromolecule metabolic process);GO:0000271(polysaccharide biosynthetic process);GO:0046914(transition metal ion binding);GO:0044464(cell part);GO:0031224(intrinsic component of membr…	NA
PC-3p-12725_949	XM_016100476.1	137	158	149	-39.4	-27.6	0.700508	7.5	1-8,158-151;10-12,149-147;13-20,145-138	9-9,150-150[SIL];x-x,146-146[BULt];21-21,137-137[UP3]	.((((((((.(((.((((((((&)))))))).)))-)))))))).	UAGAGGUCACAGUGGAUGGGGA&UUCCCGUCGACU-UGAUCUCUC	0	0	NA	NA	NA	1	30.281	4	0.866334	Output/S0h/cleaveLand_result/t_plot/PC-3p-12725_949_XM_016100476.1_149_TPlot.pdf	0	30.281	-Inf	down	3.7368e-08	6.97196e-08	yes	GO:0044042(glucan metabolic process);GO:0008270(zinc ion binding);GO:0016740(transferase activity);GO:0033692(cellular polysaccharide biosynthetic process);GO:0071554(cell wall organization or biogenesis);GO:0043170(macromolecule metabolic process);GO:0000271(polysaccharide biosynthetic process);GO:0046914(transition metal ion binding);GO:0044464(cell part);GO:0031224(intrinsic component of membr…	NA
PC-3p-12725_949	XM_016102010.2	667	688	679	-39.4	-27.9	0.708122	6.5	1-10,688-679;11-11,677-677;13-19,675-669	x-x,678-678[BULt];12-12,676-676[SIL];20-21,668-667[UP3]	..(((((((.(.((((((((((&))))))))))-).)))))))..	UCGGGAUCACGUUCGACGGGAA&UUCCCGUCGA-CUUGAUCUCUC	3	80.4764	3	0.137681	Output/S24h/cleaveLand_result/t_plot/PC-3p-12725_949_XM_016102010.2_679_TPlot.pdf	0	0	NA	NA	NA	80.4764	0	Inf	up	2.9371e-19	3.092e-18	yes	NA	ko00500(Starch and sucrose metabolism);ko00940(Phenylpropanoid biosynthesis);ko00460(Cyanoamino acid metabolism);ko01100(Metabolic pathways);ko01110(Biosynthesis of secondary metabolites);ko04626(Plant-pathogen interaction);ko04016(MAPK signaling pathway - plant)
PC-3p-12725_949	XM_016103633.2	1205	1224	1216	-39.4	-26.9	0.682741	6.5	2-5,1223-1220;7-20,1219-1206	1-1,1224-1224[UP5];6-6,x-x[BULq];21-21,1205-1205[UP3]	.((((((((((((((-((((.&.)))).)))))))))))))).	CAGGGAUCAAGUUGG-GGGAG&UUCCCGUCGACUUGAUCUCUC	1	26.8255	4	0.991781	Output/S24h/cleaveLand_result/t_plot/PC-3p-12725_949_XM_016103633.2_1216_TPlot.pdf	0	0	NA	NA	NA	26.8255	0	Inf	up	2.2264e-07	2.56268e-07	yes	NA	NA
PC-3p-12725_949	XM_016103754.2	549	567	558	-39.4	-27.2	0.690355	7.5	1-11,567-557;14-19,556-551	12-13,x-x[BULq];20-21,550-549[UP3]	..((((((--(((((((((((&)))))))))))..))))))..	UCGAGGUC--GUCGGCGGGGA&UUCCCGUCGACUUGAUCUCUC	2	53.6509	2	0.657413	Output/S24h/cleaveLand_result/t_plot/PC-3p-12725_949_XM_016103754.2_558_TPlot.pdf	0	0	NA	NA	NA	53.6509	0	Inf	up	2.3929e-13	9.82167e-13	yes	NA	NA
PC-3p-12725_949	XM_016103754.2	815	835	826	-39.4	-26.8	0.680203	5.5	1-10,835-826;12-19,825-818;20-21,816-815	11-11,x-x[BULq];x-x,817-817[BULt]	((.((((((((-((((((((((&)))))))))).))))))))-))	GAUGAGGUCGA-UUGACGGGAG&UUCCCGUCGACUUGAUCUC-UC	0	0	NA	NA	NA	1	30.281	4	0.989076	Output/S0h/cleaveLand_result/t_plot/PC-3p-12725_949_XM_016103754.2_826_TPlot.pdf	0	30.281	-Inf	down	3.7368e-08	6.97196e-08	yes	NA	NA
PC-3p-12725_949	XM_016105435.2	697	716	708	-39.4	-26.5	0.672589	7	3-8,714-709;10-20,708-698	1-2,716-715[UP5];9-9,x-x[BULq];21-21,697-697[UP3]	.(((((((((((-((((((..&..)))))).))))))))))).	AAGAGAUCAAGU-GAUGGGCA&UUCCCGUCGACUUGAUCUCUC	2	53.6509	2	0.902398	Output/S24h/cleaveLand_result/t_plot/PC-3p-12725_949_XM_016105435.2_708_TPlot.pdf	0	0	NA	NA	NA	53.6509	0	Inf	up	2.3929e-13	9.82167e-13	yes	GO:0060255(regulation of macromolecule metabolic process);GO:0006355(regulation of transcription, DNA-templated);GO:0050789(regulation of biological process);GO:2001141(regulation of RNA biosynthetic process);GO:0042393(histone binding);GO:0031323(regulation of cellular metabolic process);GO:0008270(zinc ion binding);GO:0010556(regulation of macromolecule biosynthetic process);GO:0031326(regulati…	NA
PC-3p-12725_949	XM_016108390.2	1230	1248	1241	-39.4	-27.1	0.687817	8.5	3-6,1246-1243;8-9,1242-1241;11-21,1240-1230	1-2,1248-1247[UP5];7-7,x-x[BULq];10-10,x-x[BULq]	(((((((((((-((-((((..&..)))).)).)))))))))))	GAGAGGUCAGG-CG-CGGGCA&UUCCCGUCGACUUGAUCUCUC	2	53.6509	2	0.683444	Output/S24h/cleaveLand_result/t_plot/PC-3p-12725_949_XM_016108390.2_1241_TPlot.pdf	1	30.281	4	0.946559	Output/S0h/cleaveLand_result/t_plot/PC-3p-12725_949_XM_016108390.2_1241_TPlot.pdf	53.6509	30.281	0.82519	up	0.010743	0.0115483	yes	GO:0048471(perinuclear region of cytoplasm);GO:0009816(defense response to bacterium, incompatible interaction);GO:0031348(negative regulation of defense response);GO:0065007(biological regulation);GO:0043227(membrane-bounded organelle);GO:0009605(response to external stimulus);GO:0043207(response to external biotic stimulus);GO:0045087(innate immune response);GO:0048519(negative regulation of bi…	ko00514(Other types of O-glycan biosynthesis)
PC-3p-12725_949	XM_016110426.2	2455	2474	2466	-39.4	-30.5	0.774112	5.5	1-9,2474-2466;11-12,2465-2464;14-21,2462-2455	10-10,x-x[BULq];13-13,2463-2463[SIL]	((((((((.((-(((((((((&))))))))).)).))))))))	GAGGGAUCCGG-CGACGGGGA&UUCCCGUCGACUUGAUCUCUC	2	53.6509	2	0.0345127	Output/S24h/cleaveLand_result/t_plot/PC-3p-12725_949_XM_016110426.2_2466_TPlot.pdf	0	0	NA	NA	NA	53.6509	0	Inf	up	2.3929e-13	9.82167e-13	yes	GO:0097159(organic cyclic compound binding);GO:0003676(nucleic acid binding);GO:1901363(heterocyclic compound binding);GO:0005488(binding)	ko02010(ABC transporters)
PC-3p-12725_949	XM_016112522.2	463	484	474	-39.4	-28.3	0.718274	5.5	1-8,484-477;9-13,475-471;16-21,468-463	x-x,476-476[BULt];14-15,470-469[SIL]	((((((..(((((.((((((((&))))))))-)))))..))))))	GAGAGGAGAAGUCAGGCGGGAA&UUCCCGUC-GACUUGAUCUCUC	1	26.8255	4	0.543133	Output/S24h/cleaveLand_result/t_plot/PC-3p-12725_949_XM_016112522.2_474_TPlot.pdf	0	0	NA	NA	NA	26.8255	0	Inf	up	2.2264e-07	2.56268e-07	yes	GO:0019222(regulation of metabolic process);GO:0031323(regulation of cellular metabolic process);GO:0043226(organelle);GO:0044464(cell part);GO:0060255(regulation of macromolecule metabolic process);GO:0003677(DNA binding);GO:0043231(intracellular membrane-bounded organelle);GO:0003676(nucleic acid binding);GO:0005488(binding);GO:2000112(regulation of cellular macromolecule biosynthetic process);…	ko04016(MAPK signaling pathway - plant)
PC-3p-12725_949	XM_016114216.2	1538	1557	1549	-39.4	-25.8	0.654822	7	1-8,1557-1550;10-18,1549-1541	9-9,x-x[BULq];19-21,1540-1538[UP3]	...(((((((((-((((((((&)))))))).)))))))))...	CCAGGAUCAAGU-GGCGGGAG&UUCCCGUCGACUUGAUCUCUC	1	26.8255	4	0.999978	Output/S24h/cleaveLand_result/t_plot/PC-3p-12725_949_XM_016114216.2_1549_TPlot.pdf	0	0	NA	NA	NA	26.8255	0	Inf	up	2.2264e-07	2.56268e-07	yes	GO:0097159(organic cyclic compound binding);GO:1901363(heterocyclic compound binding);GO:0003723(RNA binding);GO:0005488(binding);GO:0003676(nucleic acid binding)	NA
PC-3p-12725_949	XM_016116153.2	1422	1448	1438	-39.4	-25.7	0.652284	16.5	1-5,1448-1444;7-12,1441-1436;13-21,1430-1422	6-6,1443-1442[AILt];x-x,1435-1431[BULt]	(((((((((.....((((((..(((((&)))))-.))))))-----)))))))))	GAGGGAUCAAGUGAGGUUGAGAGGGAA&UUCCC-GUCGACU-----UGAUCUCUC	0	0	NA	NA	NA	1	30.281	4	0.999967	Output/S0h/cleaveLand_result/t_plot/PC-3p-12725_949_XM_016116153.2_1438_TPlot.pdf	0	30.281	-Inf	down	3.7368e-08	6.97196e-08	yes	GO:0046872(metal ion binding);GO:0005488(binding);GO:0016020(membrane);GO:0043167(ion binding);GO:0043169(cation binding)	NA
PC-3p-12725_949	XM_016117149.2	1434	1455	1445	-39.4	-25.8	0.654822	8	1-3,1455-1453;4-9,1451-1446;11-20,1444-1435	x-x,1452-1452[BULt];10-10,1445-1445[SIL];21-21,1434-1434[UP3]	.((((((((((.((((((.(((&)))-)))))).)))))))))).	CGGAGAUUAGGGCGGCGGUGAA&UUC-CCGUCGACUUGAUCUCUC	1	26.8255	4	0.99998	Output/S24h/cleaveLand_result/t_plot/PC-3p-12725_949_XM_016117149.2_1445_TPlot.pdf	1	30.281	4	0.99993	Output/S0h/cleaveLand_result/t_plot/PC-3p-12725_949_XM_016117149.2_1445_TPlot.pdf	26.8255	30.281	-0.17481	down	0.64747	0.647871	yes	GO:0034357(photosynthetic membrane);GO:0031967(organelle envelope);GO:0071704(organic substance metabolic process);GO:0044281(small molecule metabolic process);GO:0005506(iron ion binding);GO:0044464(cell part);GO:0044283(small molecule biosynthetic process);GO:0046394(carboxylic acid biosynthetic process);GO:1901576(organic substance biosynthetic process);GO:0005622(intracellular);GO:0008152(met…	ko01100(Metabolic pathways);ko01110(Biosynthesis of secondary metabolites);ko00592(alpha-Linolenic acid metabolism)
PC-3p-12725_949	XM_021132486.1	443	472	463	-39.4	-27.2	0.690355	22.5	1-5,472-468;7-12,466-461;13-21,451-443	6-6,467-467[SIL];x-x,460-452[BULt]	(((((((((.........((((((.(((((&))))).))))))---------)))))))))	GGGAGAUCACACCAUCAUGGUCGGAGGGAA&UUCCCGUCGACU---------UGAUCUCUC	1	26.8255	4	0.9493	Output/S24h/cleaveLand_result/t_plot/PC-3p-12725_949_XM_021132486.1_463_TPlot.pdf	0	0	NA	NA	NA	26.8255	0	Inf	up	2.2264e-07	2.56268e-07	yes	GO:0003824(catalytic activity);GO:0044260(cellular macromolecule metabolic process);GO:0043169(cation binding);GO:0043170(macromolecule metabolic process);GO:0009056(catabolic process);GO:0032446(protein modification by small protein conjugation);GO:0008152(metabolic process);GO:0036211(protein modification process);GO:0071704(organic substance metabolic process);GO:0051603(proteolysis involved i…	NA
PC-3p-12725_949	XM_021138127.1	123	147	138	-39.4	-27.3	0.692893	9	1-5,147-143;7-11,141-137;12-15,134-131;16-21,128-123	6-6,142-142[SIL];x-x,136-135[BULt];x-x,130-129[BULt]	((((((..((((..(((((.(((((&))))).)))))--))))--))))))	GAGAGAAAUCAGAUGUCGAGGGGAA&UUCCCGUCGAC--UUGA--UCUCUC	1	26.8255	4	0.936353	Output/S24h/cleaveLand_result/t_plot/PC-3p-12725_949_XM_021138127.1_138_TPlot.pdf	0	0	NA	NA	NA	26.8255	0	Inf	up	2.2264e-07	2.56268e-07	yes	GO:0016021(integral component of membrane);GO:0031224(intrinsic component of membrane);GO:0044425(membrane part);GO:0016020(membrane)	NA
PC-3p-12725_949	XM_021138324.1	515	535	526	-39.4	-27.2	0.690355	5.5	1-12,535-524;15-20,521-516	13-14,523-522[SIL];21-21,515-515[UP3]	.((((((..((((((((((((&))))))))))))..)))))).	UGGAGAUAUAGUUGAUGGGAA&UUCCCGUCGACUUGAUCUCUC	1	26.8255	4	0.959614	Output/S24h/cleaveLand_result/t_plot/PC-3p-12725_949_XM_021138324.1_526_TPlot.pdf	0	0	NA	NA	NA	26.8255	0	Inf	up	2.2264e-07	2.56268e-07	yes	GO:0016787(hydrolase activity);GO:0003824(catalytic activity)	ko00564(Glycerophospholipid metabolism);ko00230(Purine metabolism)
PC-3p-12911_938	BGI_novel_T004127	1589	1610	1600	-28.7	-18.7	0.651568	13	2-9,1609-1602;14-21,1596-1589	1-1,1610-1610[UP5];10-13,1601-1597[AILt]	((((((((.....((((((((.&.))))))))-....))))))))	GCUGAGCUUGGAGAGUUGAAGC&UUUUUAAUU-AAGUAGCUCAGC	0	0	NA	NA	NA	2	60.562	2	0.999864	Output/S0h/cleaveLand_result/t_plot/PC-3p-12911_938_BGI_novel_T004127_1600_TPlot.pdf	0	60.562	-Inf	down	7.123e-15	4.42666e-14	yes	GO:0003723(RNA binding);GO:0097159(organic cyclic compound binding);GO:0003676(nucleic acid binding);GO:1901265(nucleoside phosphate binding);GO:0000166(nucleotide binding);GO:0005488(binding);GO:0036094(small molecule binding);GO:1901363(heterocyclic compound binding)	ko03013(RNA transport);ko03040(Spliceosome);ko03015(mRNA surveillance pathway)
PC-3p-12911_938	BGI_novel_T006280	815	835	826	-28.7	-18.8	0.655052	15.5	8-16,828-820;18-21,818-815	1-7,835-829[UP5];17-17,819-819[SIL]	((((.(((((((((.......&.......))))))))).))))	GCUGUGCUGCUUGACAACGAA&UUUUUAAUUAAGUAGCUCAGC	0	0	NA	NA	NA	2	60.562	3	0.90471	Output/S0h/cleaveLand_result/t_plot/PC-3p-12911_938_BGI_novel_T006280_826_TPlot.pdf	0	60.562	-Inf	down	7.123e-15	4.42666e-14	yes	GO:0043168(anion binding);GO:0003824(catalytic activity);GO:0032549(ribonucleoside binding);GO:0043232(intracellular non-membrane-bounded organelle);GO:0005198(structural molecule activity);GO:0016818(hydrolase activity, acting on acid anhydrides, in phosphorus-containing anhydrides);GO:0044424(intracellular part);GO:1901265(nucleoside phosphate binding);GO:0032553(ribonucleotide binding);GO:0044…	ko04145(Phagosome)
PC-3p-12911_938	BGI_novel_T006910	84	95	86	-28.7	-20.8	0.724739	3	11-21,94-84	10-10,95-95[SIL]	(((((((((((.&.)))))))))))	GCUGAGCUGCUG&UUUUUAAUUAAG	1	26.8255	4	0.9493	Output/S24h/cleaveLand_result/t_plot/PC-3p-12911_938_BGI_novel_T006910_86_TPlot.pdf	0	0	NA	NA	NA	26.8255	0	Inf	up	2.2264e-07	2.56268e-07	yes	GO:0071702(organic substance transport);GO:0015833(peptide transport);GO:0051179(localization);GO:0072594(establishment of protein localization to organelle);GO:0051651(maintenance of location in cell);GO:0033365(protein localization to organelle);GO:0065007(biological regulation);GO:0005623(cell);GO:0046907(intracellular transport);GO:0045185(maintenance of protein location);GO:0034613(cellular …	NA
PC-3p-12911_938	BGI_novel_T006913	84	95	86	-28.7	-20.8	0.724739	3	11-21,94-84	10-10,95-95[SIL]	(((((((((((.&.)))))))))))	GCUGAGCUGCUG&UUUUUAAUUAAG	2	53.6509	0	0.0349575	Output/S24h/cleaveLand_result/t_plot/PC-3p-12911_938_BGI_novel_T006913_86_TPlot.pdf	0	0	NA	NA	NA	53.6509	0	Inf	up	2.3929e-13	9.82167e-13	yes	GO:0071702(organic substance transport);GO:0015833(peptide transport);GO:0051179(localization);GO:0072594(establishment of protein localization to organelle);GO:0051651(maintenance of location in cell);GO:0033365(protein localization to organelle);GO:0065007(biological regulation);GO:0005623(cell);GO:0046907(intracellular transport);GO:0045185(maintenance of protein location);GO:0034613(cellular …	NA
PC-3p-12911_938	BGI_novel_T007307	794	814	805	-28.7	-19.5	0.679443	10	5-18,810-797	1-4,814-811[UP5];19-21,796-794[UP3]	...((((((((((((((....&....))))))))))))))...	AAGGAGCUACUUAAUUACGUC&UUUUUAAUUAAGUAGCUCAGC	0	0	NA	NA	NA	3	90.843	0	0.127059	Output/S0h/cleaveLand_result/t_plot/PC-3p-12911_938_BGI_novel_T007307_805_TPlot.pdf	0	90.843	-Inf	down	1.5521e-21	2.37866e-20	yes	GO:0006807(nitrogen compound metabolic process);GO:0006457(protein folding);GO:0043412(macromolecule modification);GO:0018193(peptidyl-amino acid modification);GO:0003755(peptidyl-prolyl cis-trans isomerase activity);GO:0044260(cellular macromolecule metabolic process);GO:0018208(peptidyl-proline modification);GO:0003824(catalytic activity);GO:0044267(cellular protein metabolic process);GO:000041…	ko03040(Spliceosome)
PC-3p-12911_938	BGI_novel_T007392	1269	1289	1280	-28.7	-19.5	0.679443	6.5	1-6,1289-1284;8-9,1282-1281;11-21,1279-1269	7-7,1283-1283[SIL];10-10,1280-1280[SIL]	(((((((((((.((.((((((&)))))).)).)))))))))))	GCUGAGUUACUCAAAUGGAAA&UUUUUAAUUAAGUAGCUCAGC	1	26.8255	4	1	Output/S24h/cleaveLand_result/t_plot/PC-3p-12911_938_BGI_novel_T007392_1280_TPlot.pdf	0	0	NA	NA	NA	26.8255	0	Inf	up	2.2264e-07	2.56268e-07	yes	GO:0005622(intracellular);GO:0007154(cell communication);GO:0044464(cell part);GO:0051345(positive regulation of hydrolase activity);GO:0043085(positive regulation of catalytic activity);GO:0050896(response to stimulus);GO:0065007(biological regulation);GO:0050794(regulation of cellular process);GO:0005623(cell);GO:0007264(small GTPase mediated signal transduction);GO:0065009(regulation of molecu…	NA
PC-3p-12911_938	BGI_novel_T009578	205	229	218	-28.7	-20.9	0.728223	10	1-6,229-224;7-10,221-218;11-21,215-205	x-x,223-222[BULt];x-x,217-216[BULt]	(((((((((((..((((..((((((&))))))--))))--)))))))))))	GCUGAGCUACUAGUAGUAAUAAGAA&UUUUUA--AUUA--AGUAGCUCAGC	1	26.8255	4	0.927781	Output/S24h/cleaveLand_result/t_plot/PC-3p-12911_938_BGI_novel_T009578_218_TPlot.pdf	0	0	NA	NA	NA	26.8255	0	Inf	up	2.2264e-07	2.56268e-07	yes	GO:0016853(isomerase activity);GO:0000413(protein peptidyl-prolyl isomerization);GO:0071704(organic substance metabolic process);GO:0003755(peptidyl-prolyl cis-trans isomerase activity);GO:0018193(peptidyl-amino acid modification);GO:0009987(cellular process);GO:0044237(cellular metabolic process);GO:0036211(protein modification process);GO:0044260(cellular macromolecule metabolic process);GO:004…	NA
PC-3p-12911_938	BGI_novel_T010837	938	958	949	-28.7	-18.9	0.658537	17.5	9-21,950-938	1-8,958-951[UP5]	(((((((((((((........&........)))))))))))))	GUUGGGCUGCUUGCUCCGGAU&UUUUUAAUUAAGUAGCUCAGC	1	26.8255	4	1	Output/S24h/cleaveLand_result/t_plot/PC-3p-12911_938_BGI_novel_T010837_949_TPlot.pdf	0	0	NA	NA	NA	26.8255	0	Inf	up	2.2264e-07	2.56268e-07	yes	GO:0009221(pyrimidine deoxyribonucleotide biosynthetic process);GO:0043168(anion binding);GO:0005737(cytoplasm);GO:0044444(cytoplasmic part);GO:0009262(deoxyribonucleotide metabolic process);GO:1901576(organic substance biosynthetic process);GO:0009165(nucleotide biosynthetic process);GO:0016772(transferase activity, transferring phosphorus-containing groups);GO:0017076(purine nucleotide binding)…	ko01100(Metabolic pathways);ko00240(Pyrimidine metabolism)
PC-3p-12911_938	XM_016076656.2	820	840	831	-28.7	-20.2	0.703833	7	2-5,839-836;8-13,833-828;15-21,826-820	1-1,840-840[UP5];6-7,835-834[SIL];14-14,827-827[SIL]	(((((((.((((((..((((.&.))))..)))))).)))))))	GCUGAGCAACUUAAGAAGAAG&UUUUUAAUUAAGUAGCUCAGC	0	0	NA	NA	NA	1	30.281	4	0.999347	Output/S0h/cleaveLand_result/t_plot/PC-3p-12911_938_XM_016076656.2_831_TPlot.pdf	0	30.281	-Inf	down	3.7368e-08	6.97196e-08	yes	GO:0046872(metal ion binding);GO:0051234(establishment of localization);GO:0006811(ion transport);GO:0005488(binding);GO:0030001(metal ion transport);GO:0051179(localization);GO:0006810(transport);GO:0043169(cation binding);GO:0043167(ion binding);GO:0006812(cation transport)	NA
PC-3p-12911_938	XM_016076863.2	205	229	218	-28.7	-20.9	0.728223	10	1-6,229-224;7-10,221-218;11-21,215-205	x-x,223-222[BULt];x-x,217-216[BULt]	(((((((((((..((((..((((((&))))))--))))--)))))))))))	GCUGAGCUACUAGUAGUAAUAAGAA&UUUUUA--AUUA--AGUAGCUCAGC	1	26.8255	4	0.924038	Output/S24h/cleaveLand_result/t_plot/PC-3p-12911_938_XM_016076863.2_218_TPlot.pdf	0	0	NA	NA	NA	26.8255	0	Inf	up	2.2264e-07	2.56268e-07	yes	GO:0016853(isomerase activity);GO:0000413(protein peptidyl-prolyl isomerization);GO:0071704(organic substance metabolic process);GO:0003755(peptidyl-prolyl cis-trans isomerase activity);GO:0018193(peptidyl-amino acid modification);GO:0009987(cellular process);GO:0044237(cellular metabolic process);GO:0036211(protein modification process);GO:0044260(cellular macromolecule metabolic process);GO:004…	NA
PC-3p-12911_938	XM_016077070.2	1016	1027	1018	-28.7	-19.7	0.686411	4	11-21,1026-1016	10-10,1027-1027[SIL]	(((((((((((.&.)))))))))))	GCUGGGCUGCUA&UUUUUAAUUAAG	1	26.8255	4	0.999998	Output/S24h/cleaveLand_result/t_plot/PC-3p-12911_938_XM_016077070.2_1018_TPlot.pdf	0	0	NA	NA	NA	26.8255	0	Inf	up	2.2264e-07	2.56268e-07	yes	GO:0031224(intrinsic component of membrane);GO:0016021(integral component of membrane);GO:0016020(membrane);GO:0044425(membrane part)	NA
PC-3p-12911_938	XM_016079082.2	753	775	765	-28.7	-20.1	0.700348	11.5	1-8,775-768;11-16,764-759;17-21,757-753	9-10,767-765[AILt];x-x,758-758[BULt]	(((((.((((((...((((((((&))))))))-..))))))-)))))	GCUGGUGCUACUGCUGUUGAGGA&UUUUUAAU-UAAGUAGC-UCAGC	1	26.8255	4	0.999879	Output/S24h/cleaveLand_result/t_plot/PC-3p-12911_938_XM_016079082.2_765_TPlot.pdf	0	0	NA	NA	NA	26.8255	0	Inf	up	2.2264e-07	2.56268e-07	yes	GO:0016684(oxidoreductase activity, acting on peroxide as acceptor);GO:0003824(catalytic activity);GO:1901363(heterocyclic compound binding);GO:0016491(oxidoreductase activity);GO:0042221(response to chemical);GO:0009636(response to toxic substance);GO:1990748(cellular detoxification);GO:0098754(detoxification);GO:0004601(peroxidase activity);GO:0050896(response to stimulus);GO:0046906(tetrapyrro…	ko00053(Ascorbate and aldarate metabolism);ko00480(Glutathione metabolism)
PC-3p-12911_938	XM_016079084.2	753	775	765	-28.7	-20.1	0.700348	11.5	1-8,775-768;11-16,764-759;17-21,757-753	9-10,767-765[AILt];x-x,758-758[BULt]	(((((.((((((...((((((((&))))))))-..))))))-)))))	GCUGGUGCUACUGCUGUUGAGGA&UUUUUAAU-UAAGUAGC-UCAGC	0	0	NA	NA	NA	1	30.281	4	0.999695	Output/S0h/cleaveLand_result/t_plot/PC-3p-12911_938_XM_016079084.2_765_TPlot.pdf	0	30.281	-Inf	down	3.7368e-08	6.97196e-08	yes	GO:0016684(oxidoreductase activity, acting on peroxide as acceptor);GO:0003824(catalytic activity);GO:1901363(heterocyclic compound binding);GO:0016491(oxidoreductase activity);GO:0042221(response to chemical);GO:0009636(response to toxic substance);GO:1990748(cellular detoxification);GO:0098754(detoxification);GO:0004601(peroxidase activity);GO:0050896(response to stimulus);GO:0046906(tetrapyrro…	ko00053(Ascorbate and aldarate metabolism);ko00480(Glutathione metabolism)
PC-3p-12911_938	XM_016079933.2	608	629	620	-28.7	-18.9	0.658537	8	2-18,628-612;19-21,610-608	1-1,629-629[UP5];x-x,611-611[BULt]	(((.(((((((((((((((((.&.)))))))))))))))))-)))	GUUGGGGUUGCUUGGUUAAGGG&UUUUUAAUUAAGUAGCUC-AGC	0	0	NA	NA	NA	1	30.281	4	1	Output/S0h/cleaveLand_result/t_plot/PC-3p-12911_938_XM_016079933.2_620_TPlot.pdf	0	30.281	-Inf	down	3.7368e-08	6.97196e-08	yes	GO:0003676(nucleic acid binding);GO:0005488(binding);GO:0097159(organic cyclic compound binding);GO:1901363(heterocyclic compound binding);GO:0003723(RNA binding)	NA
PC-3p-12911_938	XM_016083951.1	1296	1306	1297	-28.7	-19.4	0.675958	2	12-21,1305-1296	11-11,1306-1306[SIL]	((((((((((.&.))))))))))	GCUGAGCUACG&UUUUUAAUUAA	1	26.8255	4	1	Output/S24h/cleaveLand_result/t_plot/PC-3p-12911_938_XM_016083951.1_1297_TPlot.pdf	0	0	NA	NA	NA	26.8255	0	Inf	up	2.2264e-07	2.56268e-07	yes	NA	NA
PC-3p-12911_938	XM_016084473.2	1189	1209	1200	-28.7	-18.9	0.658537	14	7-18,1203-1192;20-21,1190-1189	1-6,1209-1204[UP5];19-19,1191-1191[SIL]	((.((((((((((((......&......)))))))))))).))	GCAGGGCUGCUUAGUGCUUAC&UUUUUAAUUAAGUAGCUCAGC	0	0	NA	NA	NA	1	30.281	4	1	Output/S0h/cleaveLand_result/t_plot/PC-3p-12911_938_XM_016084473.2_1200_TPlot.pdf	0	30.281	-Inf	down	3.7368e-08	6.97196e-08	yes	GO:0005451(monovalent cation:proton antiporter activity);GO:0044464(cell part);GO:0050801(ion homeostasis);GO:0006812(cation transport);GO:0015078(hydrogen ion transmembrane transporter activity);GO:0048878(chemical homeostasis);GO:0015081(sodium ion transmembrane transporter activity);GO:0005737(cytoplasm);GO:0055065(metal ion homeostasis);GO:0034220(ion transmembrane transport);GO:0043229(intra…	NA
PC-3p-12911_938	XM_016084585.2	997	1019	1009	-28.7	-20.4	0.710801	8.5	2-9,1018-1011;11-17,1008-1002;18-21,1000-997	1-1,1019-1019[UP5];10-10,1010-1009[AILt];x-x,1001-1001[BULt]	((((.(((((((..((((((((.&.))))))))-.)))))))-))))	GCUGCAGCUGCUGCAAUUAGGAU&UUUUUAAUU-AAGUAGCU-CAGC	2	53.6509	3	0.484604	Output/S24h/cleaveLand_result/t_plot/PC-3p-12911_938_XM_016084585.2_1009_TPlot.pdf	0	0	NA	NA	NA	53.6509	0	Inf	up	2.3929e-13	9.82167e-13	yes	GO:0004124(cysteine synthase activity);GO:1901564(organonitrogen compound metabolic process);GO:0006535(cysteine biosynthetic process from serine);GO:0044272(sulfur compound biosynthetic process);GO:0019752(carboxylic acid metabolic process);GO:0006807(nitrogen compound metabolic process);GO:0016829(lyase activity);GO:0044283(small molecule biosynthetic process);GO:0044281(small molecule metaboli…	ko00270(Cysteine and methionine metabolism);ko01200(Carbon metabolism);ko01110(Biosynthesis of secondary metabolites);ko01100(Metabolic pathways);ko01230(Biosynthesis of amino acids);ko00920(Sulfur metabolism)
PC-3p-12911_938	XM_016085125.2	2427	2447	2438	-28.7	-22.2	0.773519	7.5	2-18,2446-2430	1-1,2447-2447[UP5];19-21,2429-2427[UP3]	...(((((((((((((((((.&.)))))))))))))))))...	UAAGAGCUGCUUGAUUGAAGC&UUUUUAAUUAAGUAGCUCAGC	1	26.8255	4	0.494539	Output/S24h/cleaveLand_result/t_plot/PC-3p-12911_938_XM_016085125.2_2438_TPlot.pdf	0	0	NA	NA	NA	26.8255	0	Inf	up	2.2264e-07	2.56268e-07	yes	GO:0044464(cell part);GO:0044424(intracellular part);GO:0016192(vesicle-mediated transport);GO:0022406(membrane docking);GO:0006904(vesicle docking involved in exocytosis);GO:0032940(secretion by cell);GO:0005623(cell);GO:0000145(exocyst);GO:0043234(protein complex);GO:0051179(localization);GO:0046903(secretion);GO:0006887(exocytosis);GO:0071944(cell periphery);GO:0099023(tethering complex);GO:00…	NA
PC-3p-12911_938	XM_016086511.1	815	837	828	-28.7	-21.3	0.74216	10	4-16,834-822;17-21,819-815	1-3,837-835[UP5];x-x,821-820[BULt]	(((((..(((((((((((((...&...)))))))))))))--)))))	GCUGAUAGCUACUUGGUUAGCUC&UUUUUAAUUAAGUAGC--UCAGC	5	134.127	3	0.150574	Output/S24h/cleaveLand_result/t_plot/PC-3p-12911_938_XM_016086511.1_828_TPlot.pdf	12	363.372	2	0.392996	Output/S0h/cleaveLand_result/t_plot/PC-3p-12911_938_XM_016086511.1_828_TPlot.pdf	134.127	363.372	-1.43784	down	8.7499e-25	1.86966e-23	yes	GO:0043167(ion binding);GO:0008270(zinc ion binding);GO:0052747(sinapyl alcohol dehydrogenase activity);GO:0008152(metabolic process);GO:0016616(oxidoreductase activity, acting on the CH-OH group of donors, NAD or NADP as acceptor);GO:0043169(cation binding);GO:0016614(oxidoreductase activity, acting on CH-OH group of donors);GO:0046914(transition metal ion binding);GO:0016491(oxidoreductase acti…	ko01100(Metabolic pathways);ko00940(Phenylpropanoid biosynthesis);ko01110(Biosynthesis of secondary metabolites)
PC-3p-12911_938	XM_016087549.2	699	718	710	-28.7	-20.1	0.700348	5	1-8,718-711;10-18,710-702;20-21,700-699	9-9,x-x[BULq];19-19,701-701[SIL]	((.(((((((((-((((((((&)))))))).))))))))).))	GCAGAGCUACUU-AUUGGAAA&UUUUUAAUUAAGUAGCUCAGC	1	26.8255	4	0.999885	Output/S24h/cleaveLand_result/t_plot/PC-3p-12911_938_XM_016087549.2_710_TPlot.pdf	0	0	NA	NA	NA	26.8255	0	Inf	up	2.2264e-07	2.56268e-07	yes	GO:0016301(kinase activity);GO:0032553(ribonucleotide binding);GO:0036211(protein modification process);GO:0043168(anion binding);GO:0019538(protein metabolic process);GO:0008152(metabolic process);GO:0043412(macromolecule modification);GO:0005488(binding);GO:0043170(macromolecule metabolic process);GO:1901265(nucleoside phosphate binding);GO:0006796(phosphate-containing compound metabolic proces…	NA
PC-3p-12911_938	XM_016090739.2	902	923	914	-28.7	-19.3	0.672474	11	4-13,920-911;14-20,909-903	1-3,923-921[UP5];x-x,910-910[BULt];21-21,902-902[UP3]	.(((((((.((((((((((...&...))))))))))-))))))).	ACUGGGCUGGCUUGGUUGACCG&UUUUUAAUUAAGU-AGCUCAGC	1	26.8255	4	1	Output/S24h/cleaveLand_result/t_plot/PC-3p-12911_938_XM_016090739.2_914_TPlot.pdf	0	0	NA	NA	NA	26.8255	0	Inf	up	2.2264e-07	2.56268e-07	yes	GO:0003824(catalytic activity);GO:0031224(intrinsic component of membrane);GO:0044425(membrane part);GO:0016021(integral component of membrane);GO:0016757(transferase activity, transferring glycosyl groups);GO:0016020(membrane);GO:0016740(transferase activity)	NA
PC-3p-12911_938	XM_016093975.2	1818	1838	1829	-28.7	-19	0.662021	15	8-13,1831-1826;15-21,1824-1818	1-7,1838-1832[UP5];14-14,1825-1825[SIL]	(((((((.((((((.......&.......)))))).)))))))	GCUGAGCAACUUGAAGCAGCA&UUUUUAAUUAAGUAGCUCAGC	1	26.8255	4	1	Output/S24h/cleaveLand_result/t_plot/PC-3p-12911_938_XM_016093975.2_1829_TPlot.pdf	0	0	NA	NA	NA	26.8255	0	Inf	up	2.2264e-07	2.56268e-07	yes	GO:0032549(ribonucleoside binding);GO:0000166(nucleotide binding);GO:0043168(anion binding);GO:0097367(carbohydrate derivative binding);GO:0019001(guanyl nucleotide binding);GO:0036094(small molecule binding);GO:0032555(purine ribonucleotide binding);GO:0005488(binding);GO:0017076(purine nucleotide binding);GO:0001883(purine nucleoside binding);GO:0016787(hydrolase activity);GO:0032550(purine rib…	NA
PC-3p-12911_938	XM_016096014.2	978	1002	993	-28.7	-19.3	0.672474	11	1-6,1002-997;9-16,994-987;17-21,982-978	7-8,996-995[SIL];x-x,986-983[BULt]	(((((....((((((((..((((((&))))))..))))))))----)))))	GCUGGUAUUGCUGCUUAUGUGAAGA&UUUUUAAUUAAGUAGC----UCAGC	0	0	NA	NA	NA	3	90.843	2	0.997701	Output/S0h/cleaveLand_result/t_plot/PC-3p-12911_938_XM_016096014.2_993_TPlot.pdf	0	90.843	-Inf	down	1.5521e-21	2.37866e-20	yes	GO:0008652(cellular amino acid biosynthetic process);GO:1901605(alpha-amino acid metabolic process);GO:0019842(vitamin binding);GO:0006520(cellular amino acid metabolic process);GO:1901576(organic substance biosynthetic process);GO:0005488(binding);GO:0043168(anion binding);GO:0044238(primary metabolic process);GO:0009097(isoleucine biosynthetic process);GO:1901607(alpha-amino acid biosynthetic p…	ko01100(Metabolic pathways);ko00260(Glycine, serine and threonine metabolism);ko01200(Carbon metabolism);ko01110(Biosynthesis of secondary metabolites);ko01230(Biosynthesis of amino acids);ko00290(Valine, leucine and isoleucine biosynthesis)
PC-3p-12911_938	XM_016096457.2	1794	1819	1810	-28.7	-18.8	0.655052	12	2-13,1818-1807;14-21,1801-1794	1-1,1819-1819[UP5];x-x,1806-1802[BULt]	((((((((.....((((((((((((.&.))))))))))))-----))))))))	GUUGGGCUUCAGUACUUGGUUGAGGC&UUUUUAAUUAAGU-----AGCUCAGC	2	53.6509	3	0.939611	Output/S24h/cleaveLand_result/t_plot/PC-3p-12911_938_XM_016096457.2_1810_TPlot.pdf	7	211.967	2	0.999813	Output/S0h/cleaveLand_result/t_plot/PC-3p-12911_938_XM_016096457.2_1810_TPlot.pdf	53.6509	211.967	-1.98216	down	2.6126e-22	5.49779e-21	yes	GO:0016830(carbon-carbon lyase activity);GO:0009445(putrescine metabolic process);GO:0009056(catabolic process);GO:0003824(catalytic activity);GO:0044237(cellular metabolic process);GO:0006596(polyamine biosynthetic process);GO:0006595(polyamine metabolic process);GO:0006525(arginine metabolic process);GO:0044281(small molecule metabolic process);GO:0044249(cellular biosynthetic process);GO:19015…	ko01100(Metabolic pathways);ko00330(Arginine and proline metabolism)
PC-3p-12911_938	XM_016097338.2	895	920	907	-28.7	-19.66	0.685017	15.5	1-6,920-915;9-14,908-903;15-21,901-895	7-8,914-909[AILt];x-x,902-902[BULt]	(((((((.((((((......((((((&))))))----..))))))-)))))))	GCUGAGCUUGCUUAUGUGGGUGAAGA&UUUUUA----AUUAAGUA-GCUCAGC	2	53.6509	2	0.99039	Output/S24h/cleaveLand_result/t_plot/PC-3p-12911_938_XM_016097338.2_907_TPlot.pdf	0	0	NA	NA	NA	53.6509	0	Inf	up	2.3929e-13	9.82167e-13	yes	GO:0005355(glucose transmembrane transporter activity);GO:0005215(transporter activity);GO:1904659(glucose transmembrane transport);GO:0015749(monosaccharide transport);GO:0005623(cell);GO:0055085(transmembrane transport);GO:0015144(carbohydrate transmembrane transporter activity);GO:0005402(cation:sugar symporter activity);GO:0015294(solute:cation symporter activity);GO:0015075(ion transmembrane…	NA
PC-3p-12911_938	XM_016100158.2	988	1008	999	-28.7	-19.04	0.663415	12.5	1-5,1008-1004;11-21,998-988	6-10,1003-999[SIL]	(((((((((((.....(((((&))))).....)))))))))))	GCUGAGUUACUCGAAGGAGAA&UUUUUAAUUAAGUAGCUCAGC	5	134.127	2	0.999627	Output/S24h/cleaveLand_result/t_plot/PC-3p-12911_938_XM_016100158.2_999_TPlot.pdf	1	30.281	4	1	Output/S0h/cleaveLand_result/t_plot/PC-3p-12911_938_XM_016100158.2_999_TPlot.pdf	134.127	30.281	2.14712	up	5.5279e-16	5.55711e-15	yes	NA	NA
PC-3p-12911_938	XM_016101082.2	1413	1435	1426	-28.7	-19.2	0.66899	8	2-14,1434-1422;15-16,1420-1419;17-21,1417-1413	1-1,1435-1435[UP5];x-x,1421-1421[BULt];x-x,1418-1418[BULt]	(((((.((.(((((((((((((.&.)))))))))))))-))-)))))	GUUGAUGCAUGCUUGGUUGAGAC&UUUUUAAUUAAGUA-GC-UCAGC	1	26.8255	4	1	Output/S24h/cleaveLand_result/t_plot/PC-3p-12911_938_XM_016101082.2_1426_TPlot.pdf	0	0	NA	NA	NA	26.8255	0	Inf	up	2.2264e-07	2.56268e-07	yes	GO:0008270(zinc ion binding);GO:0005488(binding);GO:0046872(metal ion binding);GO:0043167(ion binding);GO:0043169(cation binding);GO:0046914(transition metal ion binding)	ko03008(Ribosome biogenesis in eukaryotes)
PC-3p-12911_938	XM_016101256.2	736	757	747	-28.7	-18.7	0.651568	13	2-9,756-749;14-21,743-736	1-1,757-757[UP5];10-13,748-744[AILt]	((((((((.....((((((((.&.))))))))-....))))))))	GCUGAGCUUGGAGAGUUGAAGC&UUUUUAAUU-AAGUAGCUCAGC	1	26.8255	4	1	Output/S24h/cleaveLand_result/t_plot/PC-3p-12911_938_XM_016101256.2_747_TPlot.pdf	1	30.281	4	1	Output/S0h/cleaveLand_result/t_plot/PC-3p-12911_938_XM_016101256.2_747_TPlot.pdf	26.8255	30.281	-0.17481	down	0.64747	0.647871	yes	GO:0003723(RNA binding);GO:0097159(organic cyclic compound binding);GO:0003676(nucleic acid binding);GO:1901265(nucleoside phosphate binding);GO:0000166(nucleotide binding);GO:0005488(binding);GO:0036094(small molecule binding);GO:1901363(heterocyclic compound binding)	ko03013(RNA transport);ko03040(Spliceosome);ko03015(mRNA surveillance pathway)
PC-3p-12911_938	XM_016102340.2	1411	1437	1428	-28.7	-19.2	0.66899	13.5	1-10,1437-1428;11-17,1423-1417;18-21,1414-1411	x-x,1427-1424[BULt];x-x,1416-1415[BULt]	((((..(((((((....((((((((((&))))))))))----)))))))--))))	GCUGCAAGCUGCUGUCCUAGUUAGAGA&UUUUUAAUUA----AGUAGCU--CAGC	0	0	NA	NA	NA	1	30.281	4	1	Output/S0h/cleaveLand_result/t_plot/PC-3p-12911_938_XM_016102340.2_1428_TPlot.pdf	0	30.281	-Inf	down	3.7368e-08	6.97196e-08	yes	GO:0015031(protein transport);GO:0051641(cellular localization);GO:0006614(SRP-dependent cotranslational protein targeting to membrane);GO:0034613(cellular protein localization);GO:0046907(intracellular transport);GO:0044424(intracellular part);GO:0045047(protein targeting to ER);GO:0071702(organic substance transport);GO:0005622(intracellular);GO:0072599(establishment of protein localization to …	ko03060(Protein export)
PC-3p-12911_938	XM_016103522.2	1860	1880	1871	-28.7	-19.2	0.66899	16.5	9-21,1872-1860	1-8,1880-1873[UP5]	(((((((((((((........&........)))))))))))))	GCUGGGCUAUUUAUGGAAUUC&UUUUUAAUUAAGUAGCUCAGC	0	0	NA	NA	NA	1	30.281	4	1	Output/S0h/cleaveLand_result/t_plot/PC-3p-12911_938_XM_016103522.2_1871_TPlot.pdf	0	30.281	-Inf	down	3.7368e-08	6.97196e-08	yes	GO:1901565(organonitrogen compound catabolic process);GO:0044238(primary metabolic process);GO:0006508(proteolysis);GO:0019787(ubiquitin-like protein transferase activity);GO:0036211(protein modification process);GO:0005622(intracellular);GO:0009987(cellular process);GO:0019941(modification-dependent protein catabolic process);GO:0044248(cellular catabolic process);GO:0016740(transferase activity…	ko04120(Ubiquitin mediated proteolysis);ko04144(Endocytosis)
PC-3p-12911_938	XM_016103878.2	530	550	541	-28.7	-19	0.662021	13	6-11,545-540;14-21,537-530	1-5,550-546[UP5];12-13,539-538[SIL]	((((((((..((((((.....&.....))))))..))))))))	GCUGAGCUUAUUGAUUCCGUU&UUUUUAAUUAAGUAGCUCAGC	0	0	NA	NA	NA	2	60.562	3	0.872753	Output/S0h/cleaveLand_result/t_plot/PC-3p-12911_938_XM_016103878.2_541_TPlot.pdf	0	60.562	-Inf	down	7.123e-15	4.42666e-14	yes	GO:0097367(carbohydrate derivative binding);GO:0005200(structural constituent of cytoskeleton);GO:0016817(hydrolase activity, acting on acid anhydrides);GO:0016462(pyrophosphatase activity);GO:0032553(ribonucleotide binding);GO:0001883(purine nucleoside binding);GO:0005737(cytoplasm);GO:0017111(nucleoside-triphosphatase activity);GO:0044464(cell part);GO:0005622(intracellular);GO:0005874(microtub…	ko04145(Phagosome)
PC-3p-12911_938	XM_016105858.2	4341	4352	4343	-28.7	-20.7	0.721254	2	11-21,4351-4341	10-10,4352-4352[SIL]	(((((((((((.&.)))))))))))	GCUGAGCUACUG&UUUUUAAUUAAG	0	0	NA	NA	NA	2	60.562	2	0.758493	Output/S0h/cleaveLand_result/t_plot/PC-3p-12911_938_XM_016105858.2_4343_TPlot.pdf	0	60.562	-Inf	down	7.123e-15	4.42666e-14	yes	GO:0065008(regulation of biological quality);GO:0016817(hydrolase activity, acting on acid anhydrides);GO:0005488(binding);GO:0010876(lipid localization);GO:0016462(pyrophosphatase activity);GO:0016818(hydrolase activity, acting on acid anhydrides, in phosphorus-containing anhydrides);GO:0016020(membrane);GO:0035639(purine ribonucleoside triphosphate binding);GO:0017111(nucleoside-triphosphatase …	NA
PC-3p-12911_938	XM_016105962.2	1285	1310	1301	-28.7	-18.7	0.651568	17	7-13,1304-1298;14-21,1292-1285	1-6,1310-1305[UP5];x-x,1297-1293[BULt]	((((((((.....(((((((......&......)))))))-----))))))))	GCUGAGCUAUUUCACUUGAUGUUUCU&UUUUUAAUUAAGU-----AGCUCAGC	3	80.4764	0	0.241056	Output/S24h/cleaveLand_result/t_plot/PC-3p-12911_938_XM_016105962.2_1301_TPlot.pdf	0	0	NA	NA	NA	80.4764	0	Inf	up	2.9371e-19	3.092e-18	yes	GO:1901363(heterocyclic compound binding);GO:0005488(binding);GO:0003677(DNA binding);GO:0097159(organic cyclic compound binding);GO:0003676(nucleic acid binding)	NA
PC-3p-12911_938	XM_016107856.2	1026	1046	1037	-28.7	-19.5	0.679443	13.5	7-13,1040-1034;15-21,1032-1026	1-6,1046-1041[UP5];14-14,1033-1033[SIL]	(((((((.(((((((......&......))))))).)))))))	GCUGGGCGACUUGAUGAAGCU&UUUUUAAUUAAGUAGCUCAGC	1	26.8255	4	1	Output/S24h/cleaveLand_result/t_plot/PC-3p-12911_938_XM_016107856.2_1037_TPlot.pdf	0	0	NA	NA	NA	26.8255	0	Inf	up	2.2264e-07	2.56268e-07	yes	NA	NA
PC-3p-12911_938	XM_016108272.2	850	870	861	-28.7	-18.8	0.655052	15.5	8-16,863-855;18-21,853-850	1-7,870-864[UP5];17-17,854-854[SIL]	((((.(((((((((.......&.......))))))))).))))	GCUGUGCUGCUUGACAACGAA&UUUUUAAUUAAGUAGCUCAGC	0	0	NA	NA	NA	1	30.281	4	1	Output/S0h/cleaveLand_result/t_plot/PC-3p-12911_938_XM_016108272.2_861_TPlot.pdf	0	30.281	-Inf	down	3.7368e-08	6.97196e-08	yes	GO:0043168(anion binding);GO:0003824(catalytic activity);GO:0032549(ribonucleoside binding);GO:0043232(intracellular non-membrane-bounded organelle);GO:0005198(structural molecule activity);GO:0016818(hydrolase activity, acting on acid anhydrides, in phosphorus-containing anhydrides);GO:0044424(intracellular part);GO:1901265(nucleoside phosphate binding);GO:0032553(ribonucleotide binding);GO:0044…	ko04145(Phagosome)
PC-3p-12911_938	XM_016108402.2	753	774	764	-28.7	-19.7	0.686411	11.5	3-8,772-767;11-20,763-754	1-2,774-773[UP5];9-10,766-764[AILt];21-21,753-753[UP3]	.((((((((((...((((((..&..))))))-..)))))))))).	ACUGAGCUGCUGUUAUUAGAUA&UUUUUAAU-UAAGUAGCUCAGC	0	0	NA	NA	NA	1	30.281	4	0.99999	Output/S0h/cleaveLand_result/t_plot/PC-3p-12911_938_XM_016108402.2_764_TPlot.pdf	0	30.281	-Inf	down	3.7368e-08	6.97196e-08	yes	NA	NA
PC-3p-12911_938	XM_016109009.2	1020	1040	1031	-28.7	-19.5	0.679443	7	3-12,1038-1029;14-17,1028-1025;18-21,1023-1020	1-2,1040-1039[UP5];13-13,x-x[BULq];x-x,1024-1024[BULt]	((((.((((-((((((((((..&..)))))))))).))))-))))	GCUGAAGCU-CUUAAUUGGACA&UUUUUAAUUAAGUAGCU-CAGC	1	26.8255	4	1	Output/S24h/cleaveLand_result/t_plot/PC-3p-12911_938_XM_016109009.2_1031_TPlot.pdf	0	0	NA	NA	NA	26.8255	0	Inf	up	2.2264e-07	2.56268e-07	yes	NA	ko04626(Plant-pathogen interaction)
PC-3p-12911_938	XM_016109458.2	2330	2354	2340	-28.7	-19.6	0.682927	12.5	1-8,2354-2347;9-16,2341-2334;18-21,2333-2330	x-x,2346-2342[BULt];17-17,x-x[BULq]	((((-((((((((.....((((((((&))))))))-----)))))))).))))	GCUG-GCUGCUUAGAGAAGUUAAAAA&UUUUUAAU-----UAAGUAGCUCAGC	1	26.8255	4	0.999999	Output/S24h/cleaveLand_result/t_plot/PC-3p-12911_938_XM_016109458.2_2340_TPlot.pdf	2	60.562	2	0.987638	Output/S0h/cleaveLand_result/t_plot/PC-3p-12911_938_XM_016109458.2_2340_TPlot.pdf	26.8255	60.562	-1.17481	down	0.00030739	0.000341326	yes	GO:0097159(organic cyclic compound binding);GO:0030554(adenyl nucleotide binding);GO:0036094(small molecule binding);GO:0005524(ATP binding);GO:0017076(purine nucleotide binding);GO:0032555(purine ribonucleotide binding);GO:1901363(heterocyclic compound binding);GO:0035639(purine ribonucleoside triphosphate binding);GO:1901265(nucleoside phosphate binding);GO:0003824(catalytic activity);GO:003255…	ko03440(Homologous recombination)
PC-3p-12911_938	XM_016109999.2	589	608	600	-28.7	-18.9	0.658537	11	1-9,608-600;13-21,597-589	10-12,599-598[AILq]	(((((((((..-(((((((((&)))))))))...)))))))))	GCUGGGCUGUG-GGUUAAGGA&UUUUUAAUUAAGUAGCUCAGC	0	0	NA	NA	NA	1	30.281	4	1	Output/S0h/cleaveLand_result/t_plot/PC-3p-12911_938_XM_016109999.2_600_TPlot.pdf	0	30.281	-Inf	down	3.7368e-08	6.97196e-08	yes	NA	NA
PC-3p-12911_938	XM_016110000.2	589	608	600	-28.7	-18.9	0.658537	11	1-9,608-600;13-21,597-589	10-12,599-598[AILq]	(((((((((..-(((((((((&)))))))))...)))))))))	GCUGGGCUGUG-GGUUAAGGA&UUUUUAAUUAAGUAGCUCAGC	0	0	NA	NA	NA	1	30.281	4	1	Output/S0h/cleaveLand_result/t_plot/PC-3p-12911_938_XM_016110000.2_600_TPlot.pdf	0	30.281	-Inf	down	3.7368e-08	6.97196e-08	yes	NA	NA
PC-3p-12911_938	XM_016111447.2	2132	2152	2143	-28.7	-18.8	0.655052	8	1-10,2152-2143;12-16,2140-2136;18-21,2135-2132	11-11,2142-2141[AILt];17-17,x-x[BULq]	((((-(((((..((((((((((&))))))))))-.))))).))))	GCUG-GCUAUGAUGAUUAAAGA&UUUUUAAUUA-AGUAGCUCAGC	0	0	NA	NA	NA	2	60.562	2	0.999837	Output/S0h/cleaveLand_result/t_plot/PC-3p-12911_938_XM_016111447.2_2143_TPlot.pdf	0	60.562	-Inf	down	7.123e-15	4.42666e-14	yes	NA	NA
PC-3p-12911_938	XM_016112375.2	1417	1427	1418	-28.7	-18.8	0.655052	2	12-21,1426-1417	11-11,1427-1427[SIL]	((((((((((.&.))))))))))	GCUGAGCUACC&UUUUUAAUUAA	1	26.8255	4	1	Output/S24h/cleaveLand_result/t_plot/PC-3p-12911_938_XM_016112375.2_1418_TPlot.pdf	0	0	NA	NA	NA	26.8255	0	Inf	up	2.2264e-07	2.56268e-07	yes	GO:0065007(biological regulation);GO:0015698(inorganic anion transport);GO:0016020(membrane);GO:0022832(voltage-gated channel activity);GO:0005216(ion channel activity);GO:0034762(regulation of transmembrane transport);GO:0022838(substrate-specific channel activity);GO:0051234(establishment of localization);GO:0015103(inorganic anion transmembrane transporter activity);GO:0016021(integral compone…	NA
PC-3p-12911_938	XM_016113396.2	2186	2206	2198	-28.7	-19	0.662021	8	1-6,2206-2201;9-18,2199-2190;19-21,2188-2186	7-8,2200-2200[AILq];x-x,2189-2189[BULt]	(((.((((((((((.-((((((&))))))..))))))))))-)))	GCUGGAGCUGCUUAC-UGGAAG&UUUUUAAUUAAGUAGCUC-AGC	1	26.8255	4	1	Output/S24h/cleaveLand_result/t_plot/PC-3p-12911_938_XM_016113396.2_2198_TPlot.pdf	0	0	NA	NA	NA	26.8255	0	Inf	up	2.2264e-07	2.56268e-07	yes	GO:0004674(protein serine/threonine kinase activity);GO:0016773(phosphotransferase activity, alcohol group as acceptor);GO:0036211(protein modification process);GO:0016310(phosphorylation);GO:0030554(adenyl nucleotide binding);GO:0032555(purine ribonucleotide binding);GO:0044237(cellular metabolic process);GO:0071704(organic substance metabolic process);GO:0097367(carbohydrate derivative binding)…	NA
PC-3p-12911_938	XM_016113512.1	874	894	885	-28.7	-19.1	0.665505	12	6-19,889-876	1-5,894-890[UP5];20-21,875-874[UP3]	..((((((((((((((.....&.....))))))))))))))..	UGUGAGCUACUUGAUUCCAUC&UUUUUAAUUAAGUAGCUCAGC	4	107.302	2	0.999479	Output/S24h/cleaveLand_result/t_plot/PC-3p-12911_938_XM_016113512.1_885_TPlot.pdf	0	0	NA	NA	NA	107.302	0	Inf	up	3.8116e-25	8.17156e-24	yes	GO:0043167(ion binding);GO:1901575(organic substance catabolic process);GO:0005623(cell);GO:0061630(ubiquitin protein ligase activity);GO:0071704(organic substance metabolic process);GO:0006807(nitrogen compound metabolic process);GO:0043161(proteasome-mediated ubiquitin-dependent protein catabolic process);GO:0009057(macromolecule catabolic process);GO:0043227(membrane-bounded organelle);GO:0016…	NA
PC-3p-12911_938	XM_016113915.2	504	523	515	-28.7	-20.1	0.700348	9.5	1-8,523-516;12-21,513-504	9-11,515-514[AILq]	((((((((((..-((((((((&))))))))...))))))))))	GUUGAGCUACCC-GUUAGAGA&UUUUUAAUUAAGUAGCUCAGC	1	26.8255	4	0.999906	Output/S24h/cleaveLand_result/t_plot/PC-3p-12911_938_XM_016113915.2_515_TPlot.pdf	0	0	NA	NA	NA	26.8255	0	Inf	up	2.2264e-07	2.56268e-07	yes	NA	ko00970(Aminoacyl-tRNA biosynthesis)
PC-3p-12911_938	XM_016114808.2	1645	1665	1656	-28.7	-20	0.696864	16	9-21,1657-1645	1-8,1665-1658[UP5]	(((((((((((((........&........)))))))))))))	GCUGAGUUGCUUAUGGAUUUC&UUUUUAAUUAAGUAGCUCAGC	2	53.6509	2	0.963813	Output/S24h/cleaveLand_result/t_plot/PC-3p-12911_938_XM_016114808.2_1656_TPlot.pdf	0	0	NA	NA	NA	53.6509	0	Inf	up	2.3929e-13	9.82167e-13	yes	GO:0008270(zinc ion binding);GO:0043167(ion binding);GO:0046914(transition metal ion binding);GO:0043169(cation binding);GO:0005488(binding);GO:0046872(metal ion binding)	NA
PC-3p-12911_938	XM_016115678.2	1381	1402	1393	-28.7	-18.9	0.658537	8	2-6,1401-1397;8-17,1395-1386;18-21,1384-1381	1-1,1402-1402[UP5];7-7,1396-1396[SIL];x-x,1385-1385[BULt]	((((.((((((((((.(((((.&.))))).))))))))))-))))	GCUGAAGUUGCUUGAGUGGAAC&UUUUUAAUUAAGUAGCU-CAGC	0	0	NA	NA	NA	2	60.562	3	0.890606	Output/S0h/cleaveLand_result/t_plot/PC-3p-12911_938_XM_016115678.2_1393_TPlot.pdf	0	60.562	-Inf	down	7.123e-15	4.42666e-14	yes	GO:0016020(membrane);GO:0051179(localization);GO:0031224(intrinsic component of membrane);GO:0051234(establishment of localization);GO:0044425(membrane part);GO:0006810(transport);GO:0016021(integral component of membrane)	NA
PC-3p-12911_938	XM_016115739.2	326	346	337	-28.7	-19.8	0.689895	6.5	1-9,346-338;11-20,336-327	10-10,337-337[SIL];21-21,326-326[UP3]	.((((((((((.(((((((((&))))))))).)))))))))).	UUUGGGCUGCUAAGUUAAGAA&UUUUUAAUUAAGUAGCUCAGC	0	0	NA	NA	NA	1	30.281	4	0.999907	Output/S0h/cleaveLand_result/t_plot/PC-3p-12911_938_XM_016115739.2_337_TPlot.pdf	0	30.281	-Inf	down	3.7368e-08	6.97196e-08	yes	NA	ko04075(Plant hormone signal transduction)
PC-3p-12911_938	XM_016116124.2	1575	1595	1586	-28.7	-21	0.731707	12	6-10,1590-1586;12-21,1584-1575	1-5,1595-1591[UP5];11-11,1585-1585[SIL]	((((((((((.(((((.....&.....))))).))))))))))	GCUGAGCUACAUAGUUCGUAC&UUUUUAAUUAAGUAGCUCAGC	1	26.8255	4	0.909339	Output/S24h/cleaveLand_result/t_plot/PC-3p-12911_938_XM_016116124.2_1586_TPlot.pdf	0	0	NA	NA	NA	26.8255	0	Inf	up	2.2264e-07	2.56268e-07	yes	GO:0016020(membrane)	NA
PC-3p-12911_938	XM_016116827.2	257	276	268	-28.7	-19.7	0.686411	11	3-9,274-268;12-21,266-257	1-2,276-275[UP5];10-11,267-267[AILq]	((((((((((.-(((((((..&..)))))))..))))))))))	GCUGAGUUGCG-AGUUGAGUU&UUUUUAAUUAAGUAGCUCAGC	1	26.8255	4	0.999998	Output/S24h/cleaveLand_result/t_plot/PC-3p-12911_938_XM_016116827.2_268_TPlot.pdf	0	0	NA	NA	NA	26.8255	0	Inf	up	2.2264e-07	2.56268e-07	yes	GO:0031224(intrinsic component of membrane);GO:0016020(membrane);GO:0044425(membrane part);GO:0016021(integral component of membrane)	ko04016(MAPK signaling pathway - plant)
PC-3p-12911_938	XM_016117748.2	303	322	314	-28.7	-22	0.766551	6	2-6,321-317;8-21,316-303	1-1,322-322[UP5];7-7,x-x[BULq]	((((((((((((((-(((((.&.))))).))))))))))))))	GCUGAGUUGCUUGG-UAAAAU&UUUUUAAUUAAGUAGCUCAGC	0	0	NA	NA	NA	2	60.562	2	0.205791	Output/S0h/cleaveLand_result/t_plot/PC-3p-12911_938_XM_016117748.2_314_TPlot.pdf	0	60.562	-Inf	down	7.123e-15	4.42666e-14	yes	NA	NA
PC-3p-12911_938	XM_016117918.2	344	364	355	-28.7	-22.88	0.797213	8.5	1-5,364-360;9-21,356-344	6-8,359-357[SIL]	(((((((((((((...(((((&)))))...)))))))))))))	GCUGGGCUACUUACAGAGAGA&UUUUUAAUUAAGUAGCUCAGC	1	26.8255	4	0.332567	Output/S24h/cleaveLand_result/t_plot/PC-3p-12911_938_XM_016117918.2_355_TPlot.pdf	1	30.281	4	0.300761	Output/S0h/cleaveLand_result/t_plot/PC-3p-12911_938_XM_016117918.2_355_TPlot.pdf	26.8255	30.281	-0.17481	down	0.64747	0.647871	yes	GO:0008270(zinc ion binding);GO:0043169(cation binding);GO:0043167(ion binding);GO:0046872(metal ion binding);GO:0046914(transition metal ion binding);GO:0005488(binding)	NA
PC-3p-12911_938	XM_021126399.1	1908	1928	1919	-28.7	-18.7	0.651568	14.5	8-20,1921-1909	1-7,1928-1922[UP5];21-21,1908-1908[UP3]	.(((((((((((((.......&.......))))))))))))).	UCUGGGCUACUUAAAGCCAAG&UUUUUAAUUAAGUAGCUCAGC	0	0	NA	NA	NA	1	30.281	4	1	Output/S0h/cleaveLand_result/t_plot/PC-3p-12911_938_XM_021126399.1_1919_TPlot.pdf	0	30.281	-Inf	down	3.7368e-08	6.97196e-08	yes	NA	NA
PC-3p-12911_938	XM_021127209.1	385	405	396	-28.7	-22.88	0.797213	8.5	1-5,405-401;9-21,397-385	6-8,400-398[SIL]	(((((((((((((...(((((&)))))...)))))))))))))	GCUGGGCUACUUACAGAGAGA&UUUUUAAUUAAGUAGCUCAGC	0	0	NA	NA	NA	2	60.562	2	0.108816	Output/S0h/cleaveLand_result/t_plot/PC-3p-12911_938_XM_021127209.1_396_TPlot.pdf	0	60.562	-Inf	down	7.123e-15	4.42666e-14	yes	GO:0008270(zinc ion binding);GO:0043169(cation binding);GO:0043167(ion binding);GO:0046872(metal ion binding);GO:0046914(transition metal ion binding);GO:0005488(binding)	NA
PC-3p-12911_938	XM_021128748.1	753	775	765	-28.7	-20.1	0.700348	11.5	1-8,775-768;11-16,764-759;17-21,757-753	9-10,767-765[AILt];x-x,758-758[BULt]	(((((.((((((...((((((((&))))))))-..))))))-)))))	GCUGGUGCUACUGCUGUUGAGGA&UUUUUAAU-UAAGUAGC-UCAGC	1	26.8255	4	0.9998	Output/S24h/cleaveLand_result/t_plot/PC-3p-12911_938_XM_021128748.1_765_TPlot.pdf	0	0	NA	NA	NA	26.8255	0	Inf	up	2.2264e-07	2.56268e-07	yes	GO:0016684(oxidoreductase activity, acting on peroxide as acceptor);GO:0003824(catalytic activity);GO:1901363(heterocyclic compound binding);GO:0016491(oxidoreductase activity);GO:0042221(response to chemical);GO:0009636(response to toxic substance);GO:1990748(cellular detoxification);GO:0098754(detoxification);GO:0004601(peroxidase activity);GO:0050896(response to stimulus);GO:0046906(tetrapyrro…	ko00053(Ascorbate and aldarate metabolism);ko00480(Glutathione metabolism)
PC-3p-12911_938	XM_021130642.1	1536	1557	1548	-28.7	-21.3	0.74216	9.5	5-18,1553-1540;20-21,1537-1536	1-4,1557-1554[UP5];19-19,1539-1538[AILt]	((..((((((((((((((....&....))))))))))))))-.))	GCCGGAGCUGCUUAAUUAUGAU&UUUUUAAUUAAGUAGCUC-AGC	1	26.8255	4	0.780453	Output/S24h/cleaveLand_result/t_plot/PC-3p-12911_938_XM_021130642.1_1548_TPlot.pdf	0	0	NA	NA	NA	26.8255	0	Inf	up	2.2264e-07	2.56268e-07	yes	GO:0034599(cellular response to oxidative stress);GO:0042592(homeostatic process);GO:0044237(cellular metabolic process);GO:0005622(intracellular);GO:0006979(response to oxidative stress);GO:0015036(disulfide oxidoreductase activity);GO:0006457(protein folding);GO:0016671(oxidoreductase activity, acting on a sulfur group of donors, disulfide as acceptor);GO:0050789(regulation of biological proces…	ko00909(Sesquiterpenoid and triterpenoid biosynthesis)
PC-3p-12911_938	XM_021130643.1	805	826	817	-28.7	-21.3	0.74216	9.5	5-18,822-809;20-21,806-805	1-4,826-823[UP5];19-19,808-807[AILt]	((..((((((((((((((....&....))))))))))))))-.))	GCCGGAGCUGCUUAAUUAUGAU&UUUUUAAUUAAGUAGCUC-AGC	1	26.8255	4	0.769072	Output/S24h/cleaveLand_result/t_plot/PC-3p-12911_938_XM_021130643.1_817_TPlot.pdf	0	0	NA	NA	NA	26.8255	0	Inf	up	2.2264e-07	2.56268e-07	yes	GO:0034599(cellular response to oxidative stress);GO:0042592(homeostatic process);GO:0044237(cellular metabolic process);GO:0005622(intracellular);GO:0006979(response to oxidative stress);GO:0015036(disulfide oxidoreductase activity);GO:0006457(protein folding);GO:0016671(oxidoreductase activity, acting on a sulfur group of donors, disulfide as acceptor);GO:0050789(regulation of biological proces…	ko00909(Sesquiterpenoid and triterpenoid biosynthesis)
PC-3p-12911_938	XM_021133296.1	3870	3881	3872	-28.7	-19.9	0.69338	4	11-21,3880-3870	10-10,3881-3881[SIL]	(((((((((((.&.)))))))))))	GCUGGGCUGCUG&UUUUUAAUUAAG	1	26.8255	4	0.999954	Output/S24h/cleaveLand_result/t_plot/PC-3p-12911_938_XM_021133296.1_3872_TPlot.pdf	0	0	NA	NA	NA	26.8255	0	Inf	up	2.2264e-07	2.56268e-07	yes	NA	ko02010(ABC transporters);ko00500(Starch and sucrose metabolism);ko01100(Metabolic pathways)
PC-3p-12911_938	XM_021140803.1	754	775	765	-28.7	-19.7	0.686411	11.5	3-8,773-768;11-20,764-755	1-2,775-774[UP5];9-10,767-765[AILt];21-21,754-754[UP3]	.((((((((((...((((((..&..))))))-..)))))))))).	ACUGAGCUGCUGUUAUUAGAUA&UUUUUAAU-UAAGUAGCUCAGC	0	0	NA	NA	NA	2	60.562	2	0.976615	Output/S0h/cleaveLand_result/t_plot/PC-3p-12911_938_XM_021140803.1_765_TPlot.pdf	0	60.562	-Inf	down	7.123e-15	4.42666e-14	yes	NA	NA
PC-3p-12911_938	XM_021142288.1	1017	1037	1028	-28.7	-19.5	0.679443	7	3-12,1035-1026;14-17,1025-1022;18-21,1020-1017	1-2,1037-1036[UP5];13-13,x-x[BULq];x-x,1021-1021[BULt]	((((.((((-((((((((((..&..)))))))))).))))-))))	GCUGAAGCU-CUUAAUUGGACA&UUUUUAAUUAAGUAGCU-CAGC	1	26.8255	4	1	Output/S24h/cleaveLand_result/t_plot/PC-3p-12911_938_XM_021142288.1_1028_TPlot.pdf	5	151.405	2	0.99145	Output/S0h/cleaveLand_result/t_plot/PC-3p-12911_938_XM_021142288.1_1028_TPlot.pdf	26.8255	151.405	-2.49674	down	1.0388e-20	1.52342e-19	yes	NA	ko04626(Plant-pathogen interaction)
PC-3p-12911_938	XM_021142659.1	590	609	601	-28.7	-18.9	0.658537	11	1-9,609-601;13-21,598-590	10-12,600-599[AILq]	(((((((((..-(((((((((&)))))))))...)))))))))	GCUGGGCUGUG-GGUUAAGGA&UUUUUAAUUAAGUAGCUCAGC	0	0	NA	NA	NA	1	30.281	4	1	Output/S0h/cleaveLand_result/t_plot/PC-3p-12911_938_XM_021142659.1_601_TPlot.pdf	0	30.281	-Inf	down	3.7368e-08	6.97196e-08	yes	NA	NA
PC-3p-12911_938	XM_021143289.1	837	847	838	-28.7	-18.8	0.655052	3	12-21,846-837	11-11,847-847[SIL]	((((((((((.&.))))))))))	GCUGAGCUGCC&UUUUUAAUUAA	0	0	NA	NA	NA	2	60.562	3	0.916813	Output/S0h/cleaveLand_result/t_plot/PC-3p-12911_938_XM_021143289.1_838_TPlot.pdf	0	60.562	-Inf	down	7.123e-15	4.42666e-14	yes	GO:0003676(nucleic acid binding);GO:0005488(binding);GO:0097159(organic cyclic compound binding);GO:1901363(heterocyclic compound binding)	NA
PC-3p-13278_910	BGI_novel_T001257	1040	1061	1051	-37	-25.4	0.686486	10.5	3-9,1059-1053;12-21,1049-1040	1-2,1061-1060[UP5];10-11,1052-1050[AILt]	((((((((((...(((((((..&..)))))))-..))))))))))	GCCAAGAGCAUUGUUGCCAGCG&UUUUGGCAA-GCUGUUCUUGGC	1	26.8255	4	0.999999	Output/S24h/cleaveLand_result/t_plot/PC-3p-13278_910_BGI_novel_T001257_1051_TPlot.pdf	1	30.281	4	0.999997	Output/S0h/cleaveLand_result/t_plot/PC-3p-13278_910_BGI_novel_T001257_1051_TPlot.pdf	26.8255	30.281	-0.17481	down	0.64747	0.647871	yes	GO:0035639(purine ribonucleoside triphosphate binding);GO:0032553(ribonucleotide binding);GO:0071704(organic substance metabolic process);GO:0044272(sulfur compound biosynthetic process);GO:0004478(methionine adenosyltransferase activity);GO:0006730(one-carbon metabolic process);GO:0044249(cellular biosynthetic process);GO:0003824(catalytic activity);GO:0046872(metal ion binding);GO:0097367(carbo…	ko00270(Cysteine and methionine metabolism);ko01100(Metabolic pathways);ko01110(Biosynthesis of secondary metabolites);ko01230(Biosynthesis of amino acids)
PC-3p-13278_910	BGI_novel_T001684	427	448	439	-37	-25.1	0.678378	5	1-14,448-435;15-17,433-431;20-21,428-427	x-x,434-434[BULt];18-19,430-429[SIL]	((..(((.((((((((((((((&))))))))))))))-)))..))	GCAUGGAUGCAGCUUGCUAAAA&UUUUGGCAAGCUGU-UCUUGGC	1	26.8255	4	1	Output/S24h/cleaveLand_result/t_plot/PC-3p-13278_910_BGI_novel_T001684_439_TPlot.pdf	0	0	NA	NA	NA	26.8255	0	Inf	up	2.2264e-07	2.56268e-07	yes	GO:0098562(cytoplasmic side of membrane);GO:0009914(hormone transport);GO:0009926(auxin polar transport);GO:0032501(multicellular organismal process);GO:0043231(intracellular membrane-bounded organelle);GO:0098542(defense response to other organism);GO:0051704(multi-organism process);GO:1905360(GTPase complex);GO:0044444(cytoplasmic part);GO:0010817(regulation of hormone levels);GO:0007186(G-prot…	NA
PC-3p-13278_910	BGI_novel_T002061	4879	4897	4888	-37	-24.2	0.654054	6.5	3-11,4895-4887;13-14,4886-4885;16-21,4884-4879	1-2,4897-4896[UP5];12-12,x-x[BULq];15-15,x-x[BULq]	((((((-((-(((((((((..&..))))))))).)).))))))	GCUAAG-AC-GCUUGCCAACC&UUUUGGCAAGCUGUUCUUGGC	1	26.8255	4	1	Output/S24h/cleaveLand_result/t_plot/PC-3p-13278_910_BGI_novel_T002061_4888_TPlot.pdf	2	60.562	2	0.999986	Output/S0h/cleaveLand_result/t_plot/PC-3p-13278_910_BGI_novel_T002061_4888_TPlot.pdf	26.8255	60.562	-1.17481	down	0.00030739	0.000341326	yes	GO:0003824(catalytic activity);GO:0043232(intracellular non-membrane-bounded organelle);GO:0006338(chromatin remodeling);GO:0003676(nucleic acid binding);GO:0070013(intracellular organelle lumen);GO:0016070(RNA metabolic process);GO:0032774(RNA biosynthetic process);GO:0097659(nucleic acid-templated transcription);GO:0043229(intracellular organelle);GO:0018130(heterocycle biosynthetic process);GO…	NA
PC-3p-13278_910	BGI_novel_T003290	1123	1144	1135	-37	-25.2	0.681081	6.5	1-16,1144-1129;18-19,1126-1125	17-17,1128-1127[AILt];20-21,1124-1123[UP3]	..((..((((((((((((((((&))))))))))))))))-.))..	AACAUUGAGCAGCUUGCUAAGA&UUUUGGCAAGCUGUUC-UUGGC	1	26.8255	4	1	Output/S24h/cleaveLand_result/t_plot/PC-3p-13278_910_BGI_novel_T003290_1135_TPlot.pdf	0	0	NA	NA	NA	26.8255	0	Inf	up	2.2264e-07	2.56268e-07	yes	GO:0043167(ion binding);GO:0008033(tRNA processing);GO:0043412(macromolecule modification);GO:0006725(cellular aromatic compound metabolic process);GO:0034470(ncRNA processing);GO:0016746(transferase activity, transferring acyl groups);GO:0003824(catalytic activity);GO:0046872(metal ion binding);GO:0010467(gene expression);GO:0090304(nucleic acid metabolic process);GO:0000408(EKC/KEOPS complex);G…	NA
PC-3p-13278_910	BGI_novel_T003883	1945	1965	1957	-37	-24.8	0.67027	10.5	3-7,1963-1959;10-19,1957-1948;20-21,1946-1945	1-2,1965-1964[UP5];8-9,1958-1958[AILq];x-x,1947-1947[BULt]	((.((((((((((.-(((((..&..)))))..))))))))))-))	GCUCAAGAGCAGUG-GCCGACU&UUUUGGCAAGCUGUUCUUG-GC	1	26.8255	4	1	Output/S24h/cleaveLand_result/t_plot/PC-3p-13278_910_BGI_novel_T003883_1957_TPlot.pdf	0	0	NA	NA	NA	26.8255	0	Inf	up	2.2264e-07	2.56268e-07	yes	GO:0016021(integral component of membrane);GO:0016884(carbon-nitrogen ligase activity, with glutamine as amido-N-donor);GO:0003824(catalytic activity);GO:0016740(transferase activity);GO:0004040(amidase activity);GO:0016020(membrane);GO:0031224(intrinsic component of membrane);GO:0016874(ligase activity);GO:0016879(ligase activity, forming carbon-nitrogen bonds);GO:0016810(hydrolase activity, act…	ko00380(Tryptophan metabolism);ko01100(Metabolic pathways);ko00330(Arginine and proline metabolism);ko00970(Aminoacyl-tRNA biosynthesis);ko00360(Phenylalanine metabolism)
PC-3p-13278_910	BGI_novel_T003884	2207	2227	2219	-37	-24.8	0.67027	10.5	3-7,2225-2221;10-19,2219-2210;20-21,2208-2207	1-2,2227-2226[UP5];8-9,2220-2220[AILq];x-x,2209-2209[BULt]	((.((((((((((.-(((((..&..)))))..))))))))))-))	GCUCAAGAGCAGUG-GCCGACU&UUUUGGCAAGCUGUUCUUG-GC	4	107.302	1	0.360594	Output/S24h/cleaveLand_result/t_plot/PC-3p-13278_910_BGI_novel_T003884_2219_TPlot.pdf	1	30.281	4	1	Output/S0h/cleaveLand_result/t_plot/PC-3p-13278_910_BGI_novel_T003884_2219_TPlot.pdf	107.302	30.281	1.82519	up	5.1474e-11	2.04651e-10	yes	GO:0016021(integral component of membrane);GO:0016884(carbon-nitrogen ligase activity, with glutamine as amido-N-donor);GO:0003824(catalytic activity);GO:0016740(transferase activity);GO:0004040(amidase activity);GO:0016020(membrane);GO:0031224(intrinsic component of membrane);GO:0016874(ligase activity);GO:0016879(ligase activity, forming carbon-nitrogen bonds);GO:0016810(hydrolase activity, act…	ko00380(Tryptophan metabolism);ko01100(Metabolic pathways);ko00330(Arginine and proline metabolism);ko00970(Aminoacyl-tRNA biosynthesis);ko00360(Phenylalanine metabolism)
PC-3p-13278_910	BGI_novel_T004150	2760	2786	2777	-37	-24.6	0.664865	11.5	3-14,2784-2773;15-20,2766-2761	1-2,2786-2785[UP5];x-x,2772-2767[BULt];21-21,2760-2760[UP3]	.((((((......((((((((((((..&..))))))))))))------)))))).	CUCAGGAGAAACUGCAGCUUGCCAAUA&UUUUGGCAAGCUGU------UCUUGGC	1	26.8255	4	1	Output/S24h/cleaveLand_result/t_plot/PC-3p-13278_910_BGI_novel_T004150_2777_TPlot.pdf	0	0	NA	NA	NA	26.8255	0	Inf	up	2.2264e-07	2.56268e-07	yes	GO:0044446(intracellular organelle part);GO:0006333(chromatin assembly or disassembly);GO:0006325(chromatin organization);GO:0051252(regulation of RNA metabolic process);GO:0006351(transcription, DNA-templated);GO:0097659(nucleic acid-templated transcription);GO:0032786(positive regulation of DNA-templated transcription, elongation);GO:0032968(positive regulation of transcription elongation from …	NA
PC-3p-13278_910	BGI_novel_T004742	1934	1953	1944	-37	-27.6	0.745946	7	4-14,1950-1940;16-20,1939-1935	1-3,1953-1951[UP5];15-15,x-x[BULq];21-21,1934-1934[UP3]	.(((((-(((((((((((...&...))))))))))).))))).	CCCAAG-ACAGCUUGCCAUCA&UUUUGGCAAGCUGUUCUUGGC	0	0	NA	NA	NA	1	30.281	4	0.860221	Output/S0h/cleaveLand_result/t_plot/PC-3p-13278_910_BGI_novel_T004742_1944_TPlot.pdf	0	30.281	-Inf	down	3.7368e-08	6.97196e-08	yes	GO:0097159(organic cyclic compound binding);GO:0044464(cell part);GO:0003677(DNA binding);GO:0043227(membrane-bounded organelle);GO:0016020(membrane);GO:0005622(intracellular);GO:0043226(organelle);GO:1901363(heterocyclic compound binding);GO:0005623(cell);GO:0043231(intracellular membrane-bounded organelle);GO:0043229(intracellular organelle);GO:0003676(nucleic acid binding);GO:0005634(nucleus);…	ko04075(Plant hormone signal transduction)
PC-3p-13278_910	BGI_novel_T005180	227	247	238	-37	-25.3	0.683784	10	5-13,243-235;16-16,232-232;18-21,230-227	1-4,247-244[UP5];14-15,234-233[SIL];17-17,231-231[SIL]	((((.(..(((((((((....&....)))))))))..).))))	GCCACGUCCAGCUUGCCGUCA&UUUUGGCAAGCUGUUCUUGGC	1	26.8255	4	1	Output/S24h/cleaveLand_result/t_plot/PC-3p-13278_910_BGI_novel_T005180_238_TPlot.pdf	0	0	NA	NA	NA	26.8255	0	Inf	up	2.2264e-07	2.56268e-07	yes	NA	ko04141(Protein processing in endoplasmic reticulum);ko03060(Protein export)
PC-3p-13278_910	BGI_novel_T006304	1080	1100	1091	-37	-24.8	0.67027	4	1-13,1100-1088;15-16,1086-1085;18-20,1083-1081	14-14,1087-1087[SIL];17-17,1084-1084[SIL];21-21,1080-1080[UP3]	.(((.((.(((((((((((((&))))))))))))).)).))).	ACCAUGAUCAGCUUGUCAAAA&UUUUGGCAAGCUGUUCUUGGC	1	26.8255	4	1	Output/S24h/cleaveLand_result/t_plot/PC-3p-13278_910_BGI_novel_T006304_1091_TPlot.pdf	1	30.281	4	1	Output/S0h/cleaveLand_result/t_plot/PC-3p-13278_910_BGI_novel_T006304_1091_TPlot.pdf	26.8255	30.281	-0.17481	down	0.64747	0.647871	yes	GO:0005524(ATP binding);GO:1901363(heterocyclic compound binding);GO:1901564(organonitrogen compound metabolic process);GO:0043170(macromolecule metabolic process);GO:0008152(metabolic process);GO:0003824(catalytic activity);GO:0044237(cellular metabolic process);GO:0032555(purine ribonucleotide binding);GO:0043167(ion binding);GO:0036211(protein modification process);GO:0006468(protein phosphory…	ko03008(Ribosome biogenesis in eukaryotes);ko04712(Circadian rhythm - plant)
PC-3p-13278_910	BGI_novel_T006634	1786	1806	1797	-37	-24.7	0.667568	7.5	1-5,1806-1802;7-17,1800-1790;19-21,1788-1786	6-6,1801-1801[SIL];18-18,1789-1789[SIL]	(((.(((((((((((.(((((&))))).))))))))))).)))	GCUUAGAACGGUUUGGCGAGA&UUUUGGCAAGCUGUUCUUGGC	0	0	NA	NA	NA	1	30.281	4	1	Output/S0h/cleaveLand_result/t_plot/PC-3p-13278_910_BGI_novel_T006634_1797_TPlot.pdf	0	30.281	-Inf	down	3.7368e-08	6.97196e-08	yes	GO:0046483(heterocycle metabolic process);GO:0030554(adenyl nucleotide binding);GO:0009987(cellular process);GO:0044424(intracellular part);GO:0048731(system development);GO:0035670(plant-type ovary development);GO:0048437(floral organ development);GO:0043227(membrane-bounded organelle);GO:0048438(floral whorl development);GO:0097367(carbohydrate derivative binding);GO:0022414(reproductive proces…	ko00970(Aminoacyl-tRNA biosynthesis)
PC-3p-13278_910	BGI_novel_T006746	237	258	249	-37	-24.4	0.659459	8	2-4,257-255;6-9,253-250;11-19,248-240;20-21,238-237	1-1,258-258[UP5];5-5,254-254[SIL];10-10,249-249[SIL];x-x,239-239[BULt]	((.(((((((((.((((.(((.&.))).)))).)))))))))-))	GCUCAAGAACAGGUUGUGGAAC&UUUUGGCAAGCUGUUCUUG-GC	0	0	NA	NA	NA	1	30.281	4	1	Output/S0h/cleaveLand_result/t_plot/PC-3p-13278_910_BGI_novel_T006746_249_TPlot.pdf	0	30.281	-Inf	down	3.7368e-08	6.97196e-08	yes	GO:0044237(cellular metabolic process);GO:0009987(cellular process);GO:0090304(nucleic acid metabolic process);GO:0006807(nitrogen compound metabolic process);GO:0043169(cation binding);GO:0006725(cellular aromatic compound metabolic process);GO:0043167(ion binding);GO:0006259(DNA metabolic process);GO:0006139(nucleobase-containing compound metabolic process);GO:0033554(cellular response to stres…	ko03440(Homologous recombination)
PC-3p-13278_910	BGI_novel_T008099	244	262	255	-37	-24.4	0.659459	8	1-7,262-256;10-18,255-247;20-21,245-244	8-9,x-x[BULq];19-19,246-246[SIL]	((.(((((((((--(((((((&)))))))..))))))))).))	GCAGAGAGCAGC--GCCGAGA&UUUUGGCAAGCUGUUCUUGGC	1	26.8255	4	1	Output/S24h/cleaveLand_result/t_plot/PC-3p-13278_910_BGI_novel_T008099_255_TPlot.pdf	0	0	NA	NA	NA	26.8255	0	Inf	up	2.2264e-07	2.56268e-07	yes	GO:0006979(response to oxidative stress);GO:0016209(antioxidant activity);GO:0050896(response to stimulus);GO:0044237(cellular metabolic process);GO:0016684(oxidoreductase activity, acting on peroxide as acceptor);GO:0042221(response to chemical);GO:0097159(organic cyclic compound binding);GO:0042744(hydrogen peroxide catabolic process);GO:0098869(cellular oxidant detoxification);GO:0055114(oxida…	ko01100(Metabolic pathways);ko00940(Phenylpropanoid biosynthesis);ko01110(Biosynthesis of secondary metabolites)
PC-3p-13278_910	BGI_novel_T008285	5806	5825	5816	-37	-27.5	0.743243	6.5	3-11,5823-5815;13-17,5813-5809;19-21,5808-5806	1-2,5825-5824[UP5];12-12,5814-5814[SIL];18-18,x-x[BULq]	(((-(((((.(((((((((..&..))))))))).))))).)))	GCC-AGAGCUGCUUGCCAACA&UUUUGGCAAGCUGUUCUUGGC	2	53.6509	2	0.584411	Output/S24h/cleaveLand_result/t_plot/PC-3p-13278_910_BGI_novel_T008285_5816_TPlot.pdf	0	0	NA	NA	NA	53.6509	0	Inf	up	2.3929e-13	9.82167e-13	yes	NA	ko03410(Base excision repair)
PC-3p-13278_910	BGI_novel_T008878	1037	1055	1046	-37	-28.6	0.772973	4.5	2-12,1054-1044;15-21,1043-1037	1-1,1055-1055[UP5];13-14,x-x[BULq]	(((((((--(((((((((((.&.)))))))))))..)))))))	GCCAGGA--AGCUUGCCAGAC&UUUUGGCAAGCUGUUCUUGGC	0	0	NA	NA	NA	1	30.281	4	0.542787	Output/S0h/cleaveLand_result/t_plot/PC-3p-13278_910_BGI_novel_T008878_1046_TPlot.pdf	0	30.281	-Inf	down	3.7368e-08	6.97196e-08	yes	NA	NA
PC-3p-13278_910	BGI_novel_T008879	1486	1504	1495	-37	-28.6	0.772973	4.5	2-12,1503-1493;15-21,1492-1486	1-1,1504-1504[UP5];13-14,x-x[BULq]	(((((((--(((((((((((.&.)))))))))))..)))))))	GCCAGGA--AGCUUGCCAGAC&UUUUGGCAAGCUGUUCUUGGC	0	0	NA	NA	NA	1	30.281	4	0.465319	Output/S0h/cleaveLand_result/t_plot/PC-3p-13278_910_BGI_novel_T008879_1495_TPlot.pdf	0	30.281	-Inf	down	3.7368e-08	6.97196e-08	yes	NA	NA
PC-3p-13278_910	BGI_novel_T010432	1006	1024	1015	-37	-25.4	0.686486	8.5	4-11,1021-1014;13-14,1013-1012;16-21,1011-1006	1-3,1024-1022[UP5];12-12,x-x[BULq];15-15,x-x[BULq]	((((((-((-((((((((...&...)))))))).)).))))))	GCCAGG-AC-GCUUGCCAUGG&UUUUGGCAAGCUGUUCUUGGC	2	53.6509	2	0.991351	Output/S24h/cleaveLand_result/t_plot/PC-3p-13278_910_BGI_novel_T010432_1015_TPlot.pdf	0	0	NA	NA	NA	53.6509	0	Inf	up	2.3929e-13	9.82167e-13	yes	GO:0030001(metal ion transport);GO:0015075(ion transmembrane transporter activity);GO:0006810(transport);GO:0046873(metal ion transmembrane transporter activity);GO:0022857(transmembrane transporter activity);GO:0098662(inorganic cation transmembrane transport);GO:0005385(zinc ion transmembrane transporter activity);GO:0055085(transmembrane transport);GO:0044425(membrane part);GO:0031224(intrinsi…	NA
PC-3p-13278_910	BGI_novel_T010456	2394	2424	2413	-37	-24.5	0.662162	14	1-8,2424-2417;9-17,2414-2406;18-21,2397-2394	x-x,2416-2415[BULt];x-x,2405-2398[BULt]	((((........(((((((((..((((((((&))))))))--)))))))))--------))))	GCUAUGGGUUCUGGAACAGCUGUUGCCAAGA&UUUUGGCA--AGCUGUUCU--------UGGC	0	0	NA	NA	NA	2	60.562	2	0.999922	Output/S0h/cleaveLand_result/t_plot/PC-3p-13278_910_BGI_novel_T010456_2413_TPlot.pdf	0	60.562	-Inf	down	7.123e-15	4.42666e-14	yes	GO:0048878(chemical homeostasis);GO:0005384(manganese ion transmembrane transporter activity);GO:0044424(intracellular part);GO:0098771(inorganic ion homeostasis);GO:0065007(biological regulation);GO:0051179(localization);GO:0043226(organelle);GO:0046872(metal ion binding);GO:0098588(bounding membrane of organelle);GO:0072511(divalent inorganic cation transport);GO:0055065(metal ion homeostasis);…	NA
PC-3p-13278_910	BGI_novel_T012286	3551	3571	3562	-37	-24.9	0.672973	5	1-19,3571-3553	20-21,3552-3551[UP3]	..(((((((((((((((((((&)))))))))))))))))))..	AGCAAGGAUAGUUUGUCAAAA&UUUUGGCAAGCUGUUCUUGGC	1	26.8255	4	1	Output/S24h/cleaveLand_result/t_plot/PC-3p-13278_910_BGI_novel_T012286_3562_TPlot.pdf	0	0	NA	NA	NA	26.8255	0	Inf	up	2.2264e-07	2.56268e-07	yes	NA	NA
PC-3p-13278_910	BGI_novel_T012529	330	350	341	-37	-24.8	0.67027	7.5	2-7,349-344;10-12,341-339;14-18,337-333;20-21,331-330	1-1,350-350[UP5];8-9,343-342[SIL];13-13,338-338[SIL];19-19,332-332[SIL]	((.(((((.(((..((((((.&.))))))..))).))))).))	GCGAAGAGGAGCAGGCCAAAG&UUUUGGCAAGCUGUUCUUGGC	0	0	NA	NA	NA	1	30.281	4	1	Output/S0h/cleaveLand_result/t_plot/PC-3p-13278_910_BGI_novel_T012529_341_TPlot.pdf	0	30.281	-Inf	down	3.7368e-08	6.97196e-08	yes	NA	ko00620(Pyruvate metabolism);ko01200(Carbon metabolism);ko00710(Carbon fixation in photosynthetic organisms);ko01100(Metabolic pathways)
PC-3p-13278_910	BGI_novel_T014179	2056	2081	2067	-37	-24.52	0.662703	20.5	5-8,2077-2074;10-21,2067-2056	1-4,2081-2078[UP5];9-9,2073-2068[AILt]	((((((((((((......((((....&....))))-----.))))))))))))	GCCGAGGGCAGCCCCCUCUGCCCCUC&UUUUGGCA-----AGCUGUUCUUGGC	4	107.302	3	0.948056	Output/S24h/cleaveLand_result/t_plot/PC-3p-13278_910_BGI_novel_T014179_2067_TPlot.pdf	1	30.281	4	1	Output/S0h/cleaveLand_result/t_plot/PC-3p-13278_910_BGI_novel_T014179_2067_TPlot.pdf	107.302	30.281	1.82519	up	5.1474e-11	2.04651e-10	yes	NA	ko01100(Metabolic pathways);ko00190(Oxidative phosphorylation)
PC-3p-13278_910	BGI_novel_T014226	674	693	685	-37	-24.1	0.651351	9.5	1-6,693-688;9-21,686-674	7-8,687-687[AILq]	(((((((((((((.-((((((&))))))..)))))))))))))	GCCAGGGAUGGCUC-CCGGGA&UUUUGGCAAGCUGUUCUUGGC	1	26.8255	4	1	Output/S24h/cleaveLand_result/t_plot/PC-3p-13278_910_BGI_novel_T014226_685_TPlot.pdf	0	0	NA	NA	NA	26.8255	0	Inf	up	2.2264e-07	2.56268e-07	yes	NA	NA
PC-3p-13278_910	XM_016076842.2	992	1014	1004	-37	-25.8	0.697297	6.5	1-6,1014-1009;7-14,1007-1000;16-21,997-992	x-x,1008-1008[BULt];15-15,999-998[AILt]	((((((..((((((((.((((((&))))))-))))))))-.))))))	GCCAGGCCACAGUUUGACCAGAA&UUUUGG-CAAGCUGU-UCUUGGC	0	0	NA	NA	NA	1	30.281	4	0.999701	Output/S0h/cleaveLand_result/t_plot/PC-3p-13278_910_XM_016076842.2_1004_TPlot.pdf	0	30.281	-Inf	down	3.7368e-08	6.97196e-08	yes	GO:0071840(cellular component organization or biogenesis);GO:0044464(cell part);GO:0016043(cellular component organization);GO:0097159(organic cyclic compound binding);GO:0009987(cellular process);GO:0043227(membrane-bounded organelle);GO:0005634(nucleus);GO:0043231(intracellular membrane-bounded organelle);GO:0003723(RNA binding);GO:1901363(heterocyclic compound binding);GO:0022613(ribonucleopro…	ko03015(mRNA surveillance pathway)
PC-3p-13278_910	XM_016078091.2	1941	1960	1952	-37	-24.8	0.67027	7	1-8,1960-1953;10-10,1952-1952;12-21,1950-1941	9-9,x-x[BULq];11-11,1951-1951[SIL]	((((((((((.(-((((((((&)))))))).).))))))))))	GCCAGGAGCAAC-UGCUAGAA&UUUUGGCAAGCUGUUCUUGGC	1	26.8255	4	1	Output/S24h/cleaveLand_result/t_plot/PC-3p-13278_910_XM_016078091.2_1952_TPlot.pdf	0	0	NA	NA	NA	26.8255	0	Inf	up	2.2264e-07	2.56268e-07	yes	GO:0006928(movement of cell or subcellular component);GO:0097367(carbohydrate derivative binding);GO:0003777(microtubule motor activity);GO:0000166(nucleotide binding);GO:0016462(pyrophosphatase activity);GO:0016887(ATPase activity);GO:0005515(protein binding);GO:0044430(cytoskeletal part);GO:0005622(intracellular);GO:0044422(organelle part);GO:0008017(microtubule binding);GO:0043226(organelle);G…	NA
PC-3p-13278_910	XM_016078762.2	979	1000	991	-37	-24.1	0.651351	12	5-10,996-991;12-21,988-979	1-4,1000-997[UP5];11-11,990-989[AILt]	((((((((((..((((((....&....))))))-.))))))))))	GCCAAGAACAAAUUUGCCUGUG&UUUUGGCAAG-CUGUUCUUGGC	3	80.4764	2	0.999999	Output/S24h/cleaveLand_result/t_plot/PC-3p-13278_910_XM_016078762.2_991_TPlot.pdf	0	0	NA	NA	NA	80.4764	0	Inf	up	2.9371e-19	3.092e-18	yes	GO:1903506(regulation of nucleic acid-templated transcription);GO:0003677(DNA binding);GO:0060255(regulation of macromolecule metabolic process);GO:0050789(regulation of biological process);GO:0010468(regulation of gene expression);GO:0010556(regulation of macromolecule biosynthetic process);GO:0005488(binding);GO:0006355(regulation of transcription, DNA-templated);GO:2000112(regulation of cellul…	ko04075(Plant hormone signal transduction)
PC-3p-13278_910	XM_016080425.2	1237	1258	1249	-37	-28.1	0.759459	7	3-12,1256-1247;13-16,1245-1242;18-21,1240-1237	1-2,1258-1257[UP5];x-x,1246-1246[BULt];17-17,1241-1241[SIL]	((((.((((.((((((((((..&..))))))))))-)))).))))	GCCAUGGGCAAGCUUGCCAAUC&UUUUGGCAAGCU-GUUCUUGGC	0	0	NA	NA	NA	1	30.281	4	0.680299	Output/S0h/cleaveLand_result/t_plot/PC-3p-13278_910_XM_016080425.2_1249_TPlot.pdf	0	30.281	-Inf	down	3.7368e-08	6.97196e-08	yes	GO:0006355(regulation of transcription, DNA-templated);GO:0019222(regulation of metabolic process);GO:0003677(DNA binding);GO:0050794(regulation of cellular process);GO:0060255(regulation of macromolecule metabolic process);GO:0050789(regulation of biological process);GO:2000112(regulation of cellular macromolecule biosynthetic process);GO:0043565(sequence-specific DNA binding);GO:1903506(regulat…	ko04075(Plant hormone signal transduction)
PC-3p-13278_910	XM_016080440.2	364	384	375	-37	-25.3	0.683784	10.5	5-12,380-373;15-21,370-364	1-4,384-381[UP5];13-14,372-371[SIL]	(((((((..((((((((....&....))))))))..)))))))	GCCAGGAUGAGCUUGCUCUUU&UUUUGGCAAGCUGUUCUUGGC	0	0	NA	NA	NA	1	30.281	4	0.999999	Output/S0h/cleaveLand_result/t_plot/PC-3p-13278_910_XM_016080440.2_375_TPlot.pdf	0	30.281	-Inf	down	3.7368e-08	6.97196e-08	yes	GO:0031224(intrinsic component of membrane);GO:0016021(integral component of membrane);GO:0044425(membrane part);GO:0016020(membrane)	NA
PC-3p-13278_910	XM_016082228.2	365	384	376	-37	-25.1	0.678378	12.5	5-7,380-378;10-21,376-365	1-4,384-381[UP5];8-9,377-377[AILq]	((((((((((((.-(((....&....)))..))))))))))))	GCCAGGAACAGUA-GCCCUUC&UUUUGGCAAGCUGUUCUUGGC	0	0	NA	NA	NA	1	30.281	4	1	Output/S0h/cleaveLand_result/t_plot/PC-3p-13278_910_XM_016082228.2_376_TPlot.pdf	0	30.281	-Inf	down	3.7368e-08	6.97196e-08	yes	GO:0044424(intracellular part);GO:0005623(cell);GO:0043226(organelle);GO:0043229(intracellular organelle);GO:0005622(intracellular);GO:0044464(cell part);GO:0005694(chromosome);GO:0043228(non-membrane-bounded organelle);GO:0005488(binding);GO:0043232(intracellular non-membrane-bounded organelle)	NA
PC-3p-13278_910	XM_016082670.2	831	852	843	-37	-24.9	0.672973	7	1-9,852-844;11-18,842-835;19-21,833-831	10-10,843-843[SIL];x-x,834-834[BULt]	(((.((((((((.(((((((((&))))))))).))))))))-)))	GCUGAGGAACAGGUUGCUGAGA&UUUUGGCAAGCUGUUCUU-GGC	0	0	NA	NA	NA	1	30.281	4	1	Output/S0h/cleaveLand_result/t_plot/PC-3p-13278_910_XM_016082670.2_843_TPlot.pdf	0	30.281	-Inf	down	3.7368e-08	6.97196e-08	yes	GO:0003824(catalytic activity);GO:0015399(primary active transmembrane transporter activity);GO:0005773(vacuole);GO:0016817(hydrolase activity, acting on acid anhydrides);GO:0031090(organelle membrane);GO:0005623(cell);GO:0098805(whole membrane);GO:0043227(membrane-bounded organelle);GO:0016462(pyrophosphatase activity);GO:0005794(Golgi apparatus);GO:0016020(membrane);GO:0043492(ATPase activity, …	ko00190(Oxidative phosphorylation);ko04145(Phagosome);ko01100(Metabolic pathways)
PC-3p-13278_910	XM_016085115.2	1030	1052	1043	-37	-24.9	0.672973	7.5	1-4,1052-1049;6-12,1047-1041;14-17,1039-1036;18-21,1033-1030	5-5,1048-1048[SIL];13-13,1040-1040[SIL];x-x,1035-1034[BULt]	((((..((((.(((((((.((((&)))).))))))).))))--))))	GCCAUUGGAAGAGCUUGUGAAGA&UUUUGGCAAGCUGUUCU--UGGC	1	26.8255	4	1	Output/S24h/cleaveLand_result/t_plot/PC-3p-13278_910_XM_016085115.2_1043_TPlot.pdf	0	0	NA	NA	NA	26.8255	0	Inf	up	2.2264e-07	2.56268e-07	yes	GO:0016491(oxidoreductase activity);GO:0003824(catalytic activity);GO:0008152(metabolic process);GO:0005488(binding);GO:0046872(metal ion binding);GO:0043169(cation binding);GO:0055114(oxidation-reduction process);GO:0043167(ion binding)	ko00940(Phenylpropanoid biosynthesis);ko01110(Biosynthesis of secondary metabolites)
PC-3p-13278_910	XM_016085194.2	1038	1057	1048	-37	-26.1	0.705405	7.5	3-17,1055-1041;19-21,1040-1038	1-2,1057-1056[UP5];18-18,x-x[BULq]	(((-(((((((((((((((..&..))))))))))))))).)))	GCC-AGAAUGGUUUGCCAGUU&UUUUGGCAAGCUGUUCUUGGC	1	26.8255	4	0.999176	Output/S24h/cleaveLand_result/t_plot/PC-3p-13278_910_XM_016085194.2_1048_TPlot.pdf	0	0	NA	NA	NA	26.8255	0	Inf	up	2.2264e-07	2.56268e-07	yes	GO:0016655(oxidoreductase activity, acting on NAD(P)H, quinone or similar compound as acceptor);GO:0051287(NAD binding);GO:0016491(oxidoreductase activity);GO:0009060(aerobic respiration);GO:0005488(binding);GO:1901363(heterocyclic compound binding);GO:0008152(metabolic process);GO:0003954(NADH dehydrogenase activity);GO:0032553(ribonucleotide binding);GO:0000166(nucleotide binding);GO:0045333(ce…	ko00190(Oxidative phosphorylation);ko01100(Metabolic pathways)
PC-3p-13278_910	XM_016085525.2	188	207	199	-37	-26.2	0.708108	8.5	3-7,205-201;10-21,199-188	1-2,207-206[UP5];8-9,200-200[AILq]	((((((((((((.-(((((..&..)))))..))))))))))))	GCCAGGAACAGCA-GUCAACA&UUUUGGCAAGCUGUUCUUGGC	0	0	NA	NA	NA	1	30.281	4	0.996734	Output/S0h/cleaveLand_result/t_plot/PC-3p-13278_910_XM_016085525.2_199_TPlot.pdf	0	30.281	-Inf	down	3.7368e-08	6.97196e-08	yes	GO:0097159(organic cyclic compound binding);GO:0005622(intracellular);GO:0097367(carbohydrate derivative binding);GO:0042026(protein refolding);GO:0006457(protein folding);GO:0000166(nucleotide binding);GO:0036094(small molecule binding);GO:0017076(purine nucleotide binding);GO:0005524(ATP binding);GO:0009987(cellular process);GO:0030554(adenyl nucleotide binding);GO:0044424(intracellular part);G…	ko03018(RNA degradation)
PC-3p-13278_910	XM_016085537.2	416	437	427	-37	-25.6	0.691892	14.5	5-7,433-431;10-21,427-416	1-4,437-434[UP5];8-9,430-428[AILt]	((((((((((((...(((....&....)))-..))))))))))))	GCCAAGGACGGCAUCGCCCAGG&UUUUGGC-AAGCUGUUCUUGGC	2	53.6509	2	0.986465	Output/S24h/cleaveLand_result/t_plot/PC-3p-13278_910_XM_016085537.2_427_TPlot.pdf	0	0	NA	NA	NA	53.6509	0	Inf	up	2.3929e-13	9.82167e-13	yes	GO:0044238(primary metabolic process);GO:0071013(catalytic step 2 spliceosome);GO:0044424(intracellular part);GO:1901360(organic cyclic compound metabolic process);GO:0000377(RNA splicing, via transesterification reactions with bulged adenosine as nucleophile);GO:0046483(heterocycle metabolic process);GO:0044428(nuclear part);GO:1990904(ribonucleoprotein complex);GO:0005681(spliceosomal complex);…	ko03040(Spliceosome)
PC-3p-13278_910	XM_016086403.2	330	350	341	-37	-24.8	0.67027	7.5	2-7,349-344;10-12,341-339;14-18,337-333;20-21,331-330	1-1,350-350[UP5];8-9,343-342[SIL];13-13,338-338[SIL];19-19,332-332[SIL]	((.(((((.(((..((((((.&.))))))..))).))))).))	GCGAAGAGGAGCAGGCCAAAG&UUUUGGCAAGCUGUUCUUGGC	0	0	NA	NA	NA	2	60.562	2	0.999295	Output/S0h/cleaveLand_result/t_plot/PC-3p-13278_910_XM_016086403.2_341_TPlot.pdf	0	60.562	-Inf	down	7.123e-15	4.42666e-14	yes	NA	ko00620(Pyruvate metabolism);ko01200(Carbon metabolism);ko00710(Carbon fixation in photosynthetic organisms);ko01100(Metabolic pathways)
PC-3p-13278_910	XM_016086404.2	330	350	341	-37	-24.8	0.67027	7.5	2-7,349-344;10-12,341-339;14-18,337-333;20-21,331-330	1-1,350-350[UP5];8-9,343-342[SIL];13-13,338-338[SIL];19-19,332-332[SIL]	((.(((((.(((..((((((.&.))))))..))).))))).))	GCGAAGAGGAGCAGGCCAAAG&UUUUGGCAAGCUGUUCUUGGC	1	26.8255	4	1	Output/S24h/cleaveLand_result/t_plot/PC-3p-13278_910_XM_016086404.2_341_TPlot.pdf	0	0	NA	NA	NA	26.8255	0	Inf	up	2.2264e-07	2.56268e-07	yes	NA	ko00620(Pyruvate metabolism);ko01200(Carbon metabolism);ko00710(Carbon fixation in photosynthetic organisms);ko01100(Metabolic pathways)
PC-3p-13278_910	XM_016086451.2	765	788	779	-37	-25.24	0.682162	11	2-7,787-782;10-16,779-773;18-21,768-765	1-1,788-788[UP5];8-9,781-780[SIL];17-17,772-769[AILt]	((((....(((((((..((((((.&.))))))..)))))))---.))))	GCCACCACGAACGGCGGGCCAAGG&UUUUGGCAAGCUGUUC---UUGGC	5	134.127	3	0.790209	Output/S24h/cleaveLand_result/t_plot/PC-3p-13278_910_XM_016086451.2_779_TPlot.pdf	6	181.686	2	0.99158	Output/S0h/cleaveLand_result/t_plot/PC-3p-13278_910_XM_016086451.2_779_TPlot.pdf	134.127	181.686	-0.437844	down	0.0074421	0.00816972	yes	GO:0043226(organelle);GO:0043231(intracellular membrane-bounded organelle);GO:1901700(response to oxygen-containing compound);GO:0003676(nucleic acid binding);GO:0003700(DNA binding transcription factor activity);GO:0010200(response to chitin);GO:0005623(cell);GO:0010033(response to organic substance);GO:0050896(response to stimulus);GO:0001067(regulatory region nucleic acid binding);GO:0043227(m…	ko04144(Endocytosis)
PC-3p-13278_910	XM_016086676.2	208	226	219	-37	-26	0.702703	8.5	2-7,225-220;10-21,219-208	1-1,226-226[UP5];8-9,x-x[BULq]	((((((((((((--((((((.&.))))))..))))))))))))	GCCAAGGACAGC--GUCAGGC&UUUUGGCAAGCUGUUCUUGGC	3	80.4764	2	0.931905	Output/S24h/cleaveLand_result/t_plot/PC-3p-13278_910_XM_016086676.2_219_TPlot.pdf	2	60.562	3	0.488502	Output/S0h/cleaveLand_result/t_plot/PC-3p-13278_910_XM_016086676.2_219_TPlot.pdf	80.4764	60.562	0.410153	up	0.093557	0.0998676	yes	GO:0006605(protein targeting);GO:0015197(peptide transporter activity);GO:0071705(nitrogen compound transport);GO:0046907(intracellular transport);GO:0071702(organic substance transport);GO:0022857(transmembrane transporter activity);GO:0005215(transporter activity);GO:0006886(intracellular protein transport);GO:0045184(establishment of protein localization);GO:0051649(establishment of localizati…	ko04141(Protein processing in endoplasmic reticulum);ko03060(Protein export);ko04145(Phagosome)
PC-3p-13278_910	XM_016086677.2	208	226	219	-37	-26	0.702703	8.5	2-7,225-220;10-21,219-208	1-1,226-226[UP5];8-9,x-x[BULq]	((((((((((((--((((((.&.))))))..))))))))))))	GCCAAGGACAGC--GUCAGGC&UUUUGGCAAGCUGUUCUUGGC	0	0	NA	NA	NA	1	30.281	4	0.999202	Output/S0h/cleaveLand_result/t_plot/PC-3p-13278_910_XM_016086677.2_219_TPlot.pdf	0	30.281	-Inf	down	3.7368e-08	6.97196e-08	yes	GO:0006605(protein targeting);GO:0015197(peptide transporter activity);GO:0071705(nitrogen compound transport);GO:0046907(intracellular transport);GO:0071702(organic substance transport);GO:0022857(transmembrane transporter activity);GO:0005215(transporter activity);GO:0006886(intracellular protein transport);GO:0045184(establishment of protein localization);GO:0051649(establishment of localizati…	ko04141(Protein processing in endoplasmic reticulum);ko03060(Protein export);ko04145(Phagosome)
PC-3p-13278_910	XM_016087453.2	1218	1239	1230	-37	-24.4	0.659459	8	2-4,1238-1236;6-9,1234-1231;11-19,1229-1221;20-21,1219-1218	1-1,1239-1239[UP5];5-5,1235-1235[SIL];10-10,1230-1230[SIL];x-x,1220-1220[BULt]	((.(((((((((.((((.(((.&.))).)))).)))))))))-))	GCUCAAGAACAGGUUGUGGAAC&UUUUGGCAAGCUGUUCUUG-GC	0	0	NA	NA	NA	1	30.281	4	1	Output/S0h/cleaveLand_result/t_plot/PC-3p-13278_910_XM_016087453.2_1230_TPlot.pdf	0	30.281	-Inf	down	3.7368e-08	6.97196e-08	yes	NA	ko03440(Homologous recombination)
PC-3p-13278_910	XM_016087940.2	237	257	248	-37	-24.8	0.67027	11.5	5-7,253-251;9-17,249-241;19-21,239-237	1-4,257-254[UP5];8-8,250-250[SIL];18-18,240-240[SIL]	(((.(((((((((.(((....&....))).))))))))).)))	GCUUGGAGCAGCUCGCCGUCG&UUUUGGCAAGCUGUUCUUGGC	0	0	NA	NA	NA	1	30.281	4	1	Output/S0h/cleaveLand_result/t_plot/PC-3p-13278_910_XM_016087940.2_248_TPlot.pdf	0	30.281	-Inf	down	3.7368e-08	6.97196e-08	yes	GO:0005488(binding);GO:0070279(vitamin B6 binding);GO:0044281(small molecule metabolic process);GO:0009987(cellular process);GO:0019752(carboxylic acid metabolic process);GO:0006082(organic acid metabolic process);GO:0016831(carboxy-lyase activity);GO:0043167(ion binding);GO:0030170(pyridoxal phosphate binding);GO:0097159(organic cyclic compound binding);GO:0016829(lyase activity);GO:0036094(smal…	ko00340(Histidine metabolism);ko01100(Metabolic pathways);ko01110(Biosynthesis of secondary metabolites)
PC-3p-13278_910	XM_016088238.2	618	649	629	-37	-24.4	0.659459	24.5	2-6,648-644;7-8,640-639;9-21,630-618	1-1,649-649[UP5];x-x,643-641[BULt];x-x,638-631[BULt]	(((((((((((((........((...(((((.&.)))))---))--------)))))))))))))	GCCAAGAGCAGCUAUACAUUAUGUAACCAGAG&UUUUGG---CA--------AGCUGUUCUUGGC	4	107.302	2	0.999993	Output/S24h/cleaveLand_result/t_plot/PC-3p-13278_910_XM_016088238.2_629_TPlot.pdf	0	0	NA	NA	NA	107.302	0	Inf	up	3.8116e-25	8.17156e-24	yes	NA	ko04141(Protein processing in endoplasmic reticulum);ko00510(N-Glycan biosynthesis);ko01100(Metabolic pathways)
PC-3p-13278_910	XM_016088563.2	175	197	188	-37	-24.5	0.662162	10	4-10,194-188;12-17,186-181;18-21,178-175	1-3,197-195[UP5];11-11,187-187[SIL];x-x,180-179[BULt]	((((..((((((.(((((((...&...))))))).))))))--))))	GCCACUGGAGCAACUUGCCACAA&UUUUGGCAAGCUGUUCU--UGGC	0	0	NA	NA	NA	1	30.281	4	1	Output/S0h/cleaveLand_result/t_plot/PC-3p-13278_910_XM_016088563.2_188_TPlot.pdf	0	30.281	-Inf	down	3.7368e-08	6.97196e-08	yes	GO:0044446(intracellular organelle part);GO:0022607(cellular component assembly);GO:0051641(cellular localization);GO:0043933(macromolecular complex subunit organization);GO:0051649(establishment of localization in cell);GO:0007010(cytoskeleton organization);GO:0016020(membrane);GO:0031975(envelope);GO:0071822(protein complex subunit organization);GO:0007017(microtubule-based process);GO:0051179(…	ko03013(RNA transport)
PC-3p-13278_910	XM_016089263.2	1655	1679	1667	-37	-24.9	0.672973	16	5-8,1675-1672;9-12,1668-1665;13-21,1663-1655	1-4,1679-1676[UP5];x-x,1671-1669[BULt];x-x,1664-1664[BULt]	(((((((((.((((...((((....&....))))---))))-)))))))))	GCCAAGGGCAAGCUAAGUGCCUGUG&UUUUGGCA---AGCU-GUUCUUGGC	6	160.953	2	0.999078	Output/S24h/cleaveLand_result/t_plot/PC-3p-13278_910_XM_016089263.2_1667_TPlot.pdf	0	0	NA	NA	NA	160.953	0	Inf	up	6.9605e-37	3.65983e-35	yes	GO:0031224(intrinsic component of membrane);GO:0044425(membrane part);GO:0016020(membrane);GO:0016021(integral component of membrane);GO:0005488(binding);GO:0008289(lipid binding)	NA
PC-3p-13278_910	XM_016089500.2	632	653	644	-37	-24.9	0.672973	11	5-10,649-644;11-19,642-634	1-4,653-650[UP5];x-x,643-643[BULt];20-21,633-632[UP3]	..(((((((((.((((((....&....))))))-)))))))))..	CACAAGAACAGACUUGCCUCCU&UUUUGGCAAG-CUGUUCUUGGC	3	80.4764	3	0.883416	Output/S24h/cleaveLand_result/t_plot/PC-3p-13278_910_XM_016089500.2_644_TPlot.pdf	2	60.562	3	0.846707	Output/S0h/cleaveLand_result/t_plot/PC-3p-13278_910_XM_016089500.2_644_TPlot.pdf	80.4764	60.562	0.410153	up	0.093557	0.0998676	yes	GO:0098869(cellular oxidant detoxification);GO:0043167(ion binding);GO:0044237(cellular metabolic process);GO:0044248(cellular catabolic process);GO:0072593(reactive oxygen species metabolic process);GO:0009987(cellular process);GO:0050896(response to stimulus);GO:0006950(response to stress);GO:0042744(hydrogen peroxide catabolic process);GO:0005488(binding);GO:0042743(hydrogen peroxide metabolic…	ko00940(Phenylpropanoid biosynthesis);ko01110(Biosynthesis of secondary metabolites);ko01100(Metabolic pathways)
PC-3p-13278_910	XM_016089533.2	1040	1061	1051	-37	-25.4	0.686486	10.5	3-9,1059-1053;12-21,1049-1040	1-2,1061-1060[UP5];10-11,1052-1050[AILt]	((((((((((...(((((((..&..)))))))-..))))))))))	GCCAAGAGCAUUGUUGCCAGCG&UUUUGGCAA-GCUGUUCUUGGC	0	0	NA	NA	NA	1	30.281	4	0.999996	Output/S0h/cleaveLand_result/t_plot/PC-3p-13278_910_XM_016089533.2_1051_TPlot.pdf	0	30.281	-Inf	down	3.7368e-08	6.97196e-08	yes	GO:0035639(purine ribonucleoside triphosphate binding);GO:0032553(ribonucleotide binding);GO:0071704(organic substance metabolic process);GO:0044272(sulfur compound biosynthetic process);GO:0004478(methionine adenosyltransferase activity);GO:0006730(one-carbon metabolic process);GO:0044249(cellular biosynthetic process);GO:0003824(catalytic activity);GO:0046872(metal ion binding);GO:0097367(carbo…	ko00270(Cysteine and methionine metabolism);ko01100(Metabolic pathways);ko01110(Biosynthesis of secondary metabolites);ko01230(Biosynthesis of amino acids)
PC-3p-13278_910	XM_016091084.2	1198	1224	1214	-37	-24.6	0.664865	10.5	1-8,1224-1217;9-13,1215-1211;14-21,1205-1198	x-x,1216-1216[BULt];x-x,1210-1206[BULt]	((((((((.....(((((.((((((((&))))))))-)))))-----))))))))	GCCAGGAAGUUCUCAGCUCUGCUGAGA&UUUUGGCA-AGCUG-----UUCUUGGC	0	0	NA	NA	NA	1	30.281	4	1	Output/S0h/cleaveLand_result/t_plot/PC-3p-13278_910_XM_016091084.2_1214_TPlot.pdf	0	30.281	-Inf	down	3.7368e-08	6.97196e-08	yes	GO:0044464(cell part);GO:0003824(catalytic activity);GO:0005622(intracellular);GO:0000151(ubiquitin ligase complex);GO:0004842(ubiquitin-protein transferase activity);GO:1902494(catalytic complex);GO:1990234(transferase complex);GO:0019787(ubiquitin-like protein transferase activity);GO:0016740(transferase activity);GO:0044424(intracellular part);GO:0031463(Cul3-RING ubiquitin ligase complex);GO:…	NA
PC-3p-13278_910	XM_016091448.2	1032	1054	1045	-37	-24.3	0.656757	10	2-12,1053-1043;13-20,1040-1033	1-1,1054-1054[UP5];x-x,1042-1041[BULt];21-21,1032-1032[UP3]	.((((((((..(((((((((((.&.)))))))))))--)))))))).	UCCGAGAAUUAGGCUUGUCAGAU&UUUUGGCAAGCU--GUUCUUGGC	0	0	NA	NA	NA	1	30.281	4	1	Output/S0h/cleaveLand_result/t_plot/PC-3p-13278_910_XM_016091448.2_1045_TPlot.pdf	0	30.281	-Inf	down	3.7368e-08	6.97196e-08	yes	GO:0043226(organelle);GO:0043231(intracellular membrane-bounded organelle);GO:1901363(heterocyclic compound binding);GO:0005623(cell);GO:0050789(regulation of biological process);GO:0003676(nucleic acid binding);GO:0010468(regulation of gene expression);GO:0005739(mitochondrion);GO:0044424(intracellular part);GO:0060255(regulation of macromolecule metabolic process);GO:0031323(regulation of cellu…	NA
PC-3p-13278_910	XM_016091541.2	140	163	151	-37	-24.7	0.667568	11	2-8,162-156;9-12,152-149;14-20,147-141	1-1,163-163[UP5];x-x,155-153[BULt];13-13,148-148[SIL];21-21,140-140[UP3]	.(((((((.((((...(((((((.&.)))))))---)))).))))))).	CCCAAGAAGAGCUUCUUGCCGAGC&UUUUGGCA---AGCUGUUCUUGGC	4	107.302	3	0.927281	Output/S24h/cleaveLand_result/t_plot/PC-3p-13278_910_XM_016091541.2_151_TPlot.pdf	3	90.843	3	0.898459	Output/S0h/cleaveLand_result/t_plot/PC-3p-13278_910_XM_016091541.2_151_TPlot.pdf	107.302	90.843	0.240228	up	0.24228	0.257729	yes	NA	NA
PC-3p-13278_910	XM_016091988.2	640	659	651	-37	-24.1	0.651351	9.5	1-6,659-654;9-21,652-640	7-8,653-653[AILq]	(((((((((((((.-((((((&))))))..)))))))))))))	GCCAGGGAUGGCUC-CCGGGA&UUUUGGCAAGCUGUUCUUGGC	1	26.8255	4	1	Output/S24h/cleaveLand_result/t_plot/PC-3p-13278_910_XM_016091988.2_651_TPlot.pdf	0	0	NA	NA	NA	26.8255	0	Inf	up	2.2264e-07	2.56268e-07	yes	NA	NA
PC-3p-13278_910	XM_016092496.1	549	571	560	-37	-25.9	0.7	9.5	3-8,569-564;9-14,561-556;16-21,554-549	1-2,571-570[UP5];x-x,563-562[BULt];15-15,555-555[SIL]	((((((.((((((..((((((..&..))))))--)))))).))))))	GCCAAGUGCAGUUAAUGCCAAUG&UUUUGGCA--AGCUGUUCUUGGC	1	26.8255	4	0.999814	Output/S24h/cleaveLand_result/t_plot/PC-3p-13278_910_XM_016092496.1_560_TPlot.pdf	0	0	NA	NA	NA	26.8255	0	Inf	up	2.2264e-07	2.56268e-07	yes	GO:0043650(dicarboxylic acid biosynthetic process);GO:0043648(dicarboxylic acid metabolic process);GO:0044283(small molecule biosynthetic process);GO:0009089(lysine biosynthetic process via diaminopimelate);GO:0005737(cytoplasm);GO:0006807(nitrogen compound metabolic process);GO:0008152(metabolic process);GO:0009987(cellular process);GO:0046394(carboxylic acid biosynthetic process);GO:0005622(int…	ko01230(Biosynthesis of amino acids);ko00261(Monobactam biosynthesis);ko01110(Biosynthesis of secondary metabolites);ko00300(Lysine biosynthesis);ko01100(Metabolic pathways)
PC-3p-13278_910	XM_016092520.2	1305	1331	1322	-37	-26.4	0.713514	13	4-14,1328-1318;15-21,1311-1305	1-3,1331-1329[UP5];x-x,1317-1312[BULt]	(((((((......(((((((((((...&...)))))))))))------)))))))	GCCAAGAAGUGCAACGGUUUGCCAUUA&UUUUGGCAAGCUGU------UCUUGGC	0	0	NA	NA	NA	1	30.281	4	0.992695	Output/S0h/cleaveLand_result/t_plot/PC-3p-13278_910_XM_016092520.2_1322_TPlot.pdf	0	30.281	-Inf	down	3.7368e-08	6.97196e-08	yes	NA	NA
PC-3p-13278_910	XM_016095043.2	64	87	75	-37	-24.82	0.670811	18.5	5-7,83-81;10-21,75-64	1-4,87-84[UP5];8-9,80-76[AILt]	((((((((((((.....(((....&....)))---..))))))))))))	GCCAAGGACAGCGUAAGGCUCGUC&UUUUGGC---AAGCUGUUCUUGGC	0	0	NA	NA	NA	1	30.281	4	1	Output/S0h/cleaveLand_result/t_plot/PC-3p-13278_910_XM_016095043.2_75_TPlot.pdf	0	30.281	-Inf	down	3.7368e-08	6.97196e-08	yes	GO:1904680(peptide transmembrane transporter activity);GO:0070727(cellular macromolecule localization);GO:0005623(cell);GO:0071702(organic substance transport);GO:0022884(macromolecule transmembrane transporter activity);GO:0034613(cellular protein localization);GO:0071705(nitrogen compound transport);GO:0005215(transporter activity);GO:0015399(primary active transmembrane transporter activity);G…	ko04145(Phagosome);ko03060(Protein export);ko04141(Protein processing in endoplasmic reticulum)
PC-3p-13278_910	XM_016095044.2	64	87	75	-37	-24.82	0.670811	18.5	5-7,83-81;10-21,75-64	1-4,87-84[UP5];8-9,80-76[AILt]	((((((((((((.....(((....&....)))---..))))))))))))	GCCAAGGACAGCGUAAGGCUCGUC&UUUUGGC---AAGCUGUUCUUGGC	1	26.8255	4	1	Output/S24h/cleaveLand_result/t_plot/PC-3p-13278_910_XM_016095044.2_75_TPlot.pdf	1	30.281	4	1	Output/S0h/cleaveLand_result/t_plot/PC-3p-13278_910_XM_016095044.2_75_TPlot.pdf	26.8255	30.281	-0.17481	down	0.64747	0.647871	yes	GO:1904680(peptide transmembrane transporter activity);GO:0070727(cellular macromolecule localization);GO:0005623(cell);GO:0071702(organic substance transport);GO:0022884(macromolecule transmembrane transporter activity);GO:0034613(cellular protein localization);GO:0071705(nitrogen compound transport);GO:0005215(transporter activity);GO:0015399(primary active transmembrane transporter activity);G…	ko04145(Phagosome);ko03060(Protein export);ko04141(Protein processing in endoplasmic reticulum)
PC-3p-13278_910	XM_016095558.2	1381	1402	1394	-37	-25.3	0.683784	8	1-7,1402-1396;10-18,1394-1386;19-21,1383-1381	8-9,1395-1395[AILq];x-x,1385-1384[BULt]	(((..(((((((((.-(((((((&)))))))..)))))))))--)))	GCCUCAAGAACAGUG-GCCAGAA&UUUUGGCAAGCUGUUCUU--GGC	1	26.8255	4	1	Output/S24h/cleaveLand_result/t_plot/PC-3p-13278_910_XM_016095558.2_1394_TPlot.pdf	0	0	NA	NA	NA	26.8255	0	Inf	up	2.2264e-07	2.56268e-07	yes	GO:0016787(hydrolase activity);GO:0003824(catalytic activity);GO:0008152(metabolic process)	ko04075(Plant hormone signal transduction)
PC-3p-13278_910	XM_016096284.2	2762	2783	2774	-37	-25.7	0.694595	10	5-14,2779-2770;17-21,2766-2762	1-4,2783-2780[UP5];15-16,2769-2767[AILt]	(((((...((((((((((....&....))))))))))-..)))))	GCCAAAUUACAGCUUGCCUCCC&UUUUGGCAAGCUGU-UCUUGGC	2	53.6509	2	0.977278	Output/S24h/cleaveLand_result/t_plot/PC-3p-13278_910_XM_016096284.2_2774_TPlot.pdf	0	0	NA	NA	NA	53.6509	0	Inf	up	2.3929e-13	9.82167e-13	yes	GO:0004553(hydrolase activity, hydrolyzing O-glycosyl compounds);GO:0005488(binding);GO:0043170(macromolecule metabolic process);GO:0004559(alpha-mannosidase activity);GO:0006013(mannose metabolic process);GO:0019318(hexose metabolic process);GO:0044267(cellular protein metabolic process);GO:1901135(carbohydrate derivative metabolic process);GO:0015923(mannosidase activity);GO:0019538(protein met…	ko00511(Other glycan degradation)
PC-3p-13278_910	XM_016096739.2	1017	1040	1029	-37	-25.7	0.694595	10	2-8,1039-1033;9-17,1030-1022;18-21,1020-1017	1-1,1040-1040[UP5];x-x,1032-1031[BULt];x-x,1021-1021[BULt]	((((.(((((((((..(((((((.&.)))))))--)))))))))-))))	GCCAGGGAGCAGUUAGUGCCAGGU&UUUUGGCA--AGCUGUUCU-UGGC	1	26.8255	4	0.999987	Output/S24h/cleaveLand_result/t_plot/PC-3p-13278_910_XM_016096739.2_1029_TPlot.pdf	0	0	NA	NA	NA	26.8255	0	Inf	up	2.2264e-07	2.56268e-07	yes	GO:0016020(membrane);GO:0005622(intracellular);GO:0006810(transport);GO:0046907(intracellular transport);GO:0015399(primary active transmembrane transporter activity);GO:0008320(protein transmembrane transporter activity);GO:0034613(cellular protein localization);GO:0015031(protein transport);GO:0015405(P-P-bond-hydrolysis-driven transmembrane transporter activity);GO:0006886(intracellular protei…	NA
PC-3p-13278_910	XM_016097654.2	631	652	643	-37	-24.6	0.664865	9	4-9,649-644;11-13,642-640;14-21,638-631	1-3,652-650[UP5];10-10,643-643[SIL];x-x,639-639[BULt]	((((((((.(((.((((((...&...)))))).)))-))))))))	GCCAAGGGCCAGAUUGCCAUCG&UUUUGGCAAGCUG-UUCUUGGC	2	53.6509	2	0.99995	Output/S24h/cleaveLand_result/t_plot/PC-3p-13278_910_XM_016097654.2_643_TPlot.pdf	0	0	NA	NA	NA	53.6509	0	Inf	up	2.3929e-13	9.82167e-13	yes	NA	NA
PC-3p-13278_910	XM_016098826.2	1174	1195	1186	-37	-24.2	0.654054	12	5-11,1191-1185;12-17,1183-1178;19-21,1176-1174	1-4,1195-1192[UP5];x-x,1184-1184[BULt];18-18,1177-1177[SIL]	(((.((((((.(((((((....&....)))))))-)))))).)))	GCUCAGAGCGUGCUUGCCUUCC&UUUUGGCAAGC-UGUUCUUGGC	0	0	NA	NA	NA	1	30.281	4	1	Output/S0h/cleaveLand_result/t_plot/PC-3p-13278_910_XM_016098826.2_1186_TPlot.pdf	0	30.281	-Inf	down	3.7368e-08	6.97196e-08	yes	GO:0016020(membrane);GO:0044425(membrane part);GO:0031224(intrinsic component of membrane);GO:0016021(integral component of membrane)	ko04626(Plant-pathogen interaction);ko04016(MAPK signaling pathway - plant);ko03010(Ribosome)
PC-3p-13278_910	XM_016100066.2	368	395	386	-37	-24.9	0.672973	16.5	6-14,390-382;15-21,374-368	1-5,395-391[UP5];x-x,381-375[BULt]	(((((((.......(((((((((.....&.....)))))))))-------)))))))	GCCAGGAACCAUGGACAGCUUGCGUUCU&UUUUGGCAAGCUGU-------UCUUGGC	0	0	NA	NA	NA	1	30.281	4	1	Output/S0h/cleaveLand_result/t_plot/PC-3p-13278_910_XM_016100066.2_386_TPlot.pdf	0	30.281	-Inf	down	3.7368e-08	6.97196e-08	yes	GO:0044464(cell part);GO:0015630(microtubule cytoskeleton);GO:0099080(supramolecular complex);GO:0032553(ribonucleotide binding);GO:0005737(cytoplasm);GO:1901265(nucleoside phosphate binding);GO:0044446(intracellular organelle part);GO:0043168(anion binding);GO:0099081(supramolecular polymer);GO:0019001(guanyl nucleotide binding);GO:0009987(cellular process);GO:0005525(GTP binding);GO:0099513(pol…	ko04145(Phagosome)
PC-3p-13278_910	XM_016100104.2	1728	1752	1742	-37	-24.2	0.654054	10.5	2-8,1751-1745;10-14,1742-1738;15-21,1734-1728	1-1,1752-1752[UP5];9-9,1744-1743[AILt];x-x,1737-1735[BULt]	(((((((...(((((..(((((((.&.)))))))-.)))))---)))))))	GCUAGGGAGCACAGCGAUGCCAAGG&UUUUGGCA-AGCUGU---UCUUGGC	1	26.8255	4	1	Output/S24h/cleaveLand_result/t_plot/PC-3p-13278_910_XM_016100104.2_1742_TPlot.pdf	0	0	NA	NA	NA	26.8255	0	Inf	up	2.2264e-07	2.56268e-07	yes	NA	NA
PC-3p-13278_910	XM_016100763.2	628	646	639	-37	-25.6	0.691892	8.5	2-6,645-641;9-21,640-628	1-1,646-646[UP5];7-8,x-x[BULq]	(((((((((((((--(((((.&.)))))..)))))))))))))	GCCGGGGACGGCU--CCAGAC&UUUUGGCAAGCUGUUCUUGGC	1	26.8255	4	0.999995	Output/S24h/cleaveLand_result/t_plot/PC-3p-13278_910_XM_016100763.2_639_TPlot.pdf	0	0	NA	NA	NA	26.8255	0	Inf	up	2.2264e-07	2.56268e-07	yes	GO:1903506(regulation of nucleic acid-templated transcription);GO:0009889(regulation of biosynthetic process);GO:1901265(nucleoside phosphate binding);GO:0009890(negative regulation of biosynthetic process);GO:0031326(regulation of cellular biosynthetic process);GO:0019222(regulation of metabolic process);GO:0043168(anion binding);GO:0045934(negative regulation of nucleobase-containing compound m…	ko00130(Ubiquinone and other terpenoid-quinone biosynthesis);ko01110(Biosynthesis of secondary metabolites)
PC-3p-13278_910	XM_016100819.2	690	710	701	-37	-26.5	0.716216	10	5-12,706-699;14-20,697-691	1-4,710-707[UP5];13-13,698-698[SIL];21-21,690-690[UP3]	.(((((((.((((((((....&....)))))))).))))))).	CCCAGGAGGAGCUUGCCCCAA&UUUUGGCAAGCUGUUCUUGGC	0	0	NA	NA	NA	1	30.281	4	0.991067	Output/S0h/cleaveLand_result/t_plot/PC-3p-13278_910_XM_016100819.2_701_TPlot.pdf	0	30.281	-Inf	down	3.7368e-08	6.97196e-08	yes	NA	NA
PC-3p-13278_910	XM_016100820.2	668	688	679	-37	-26.5	0.716216	10	5-12,684-677;14-20,675-669	1-4,688-685[UP5];13-13,676-676[SIL];21-21,668-668[UP3]	.(((((((.((((((((....&....)))))))).))))))).	CCCAGGAGGAGCUUGCCCCAA&UUUUGGCAAGCUGUUCUUGGC	1	26.8255	4	0.995518	Output/S24h/cleaveLand_result/t_plot/PC-3p-13278_910_XM_016100820.2_679_TPlot.pdf	1	30.281	4	0.991646	Output/S0h/cleaveLand_result/t_plot/PC-3p-13278_910_XM_016100820.2_679_TPlot.pdf	26.8255	30.281	-0.17481	down	0.64747	0.647871	yes	NA	NA
PC-3p-13278_910	XM_016101909.2	457	478	469	-37	-25.6	0.691892	8.5	3-8,476-471;10-17,469-462;18-21,460-457	1-2,478-477[UP5];9-9,470-470[SIL];x-x,461-461[BULt]	((((.((((((((.((((((..&..)))))).))))))))-))))	GCCAGAGAGCAGCGUGUCGACG&UUUUGGCAAGCUGUUCU-UGGC	0	0	NA	NA	NA	1	30.281	4	0.999979	Output/S0h/cleaveLand_result/t_plot/PC-3p-13278_910_XM_016101909.2_469_TPlot.pdf	0	30.281	-Inf	down	3.7368e-08	6.97196e-08	yes	GO:0009987(cellular process);GO:0006048(UDP-N-acetylglucosamine biosynthetic process);GO:1901135(carbohydrate derivative metabolic process);GO:0071704(organic substance metabolic process);GO:0044249(cellular biosynthetic process);GO:1901360(organic cyclic compound metabolic process);GO:0044464(cell part);GO:0008152(metabolic process);GO:0006725(cellular aromatic compound metabolic process);GO:000…	ko01100(Metabolic pathways);ko00520(Amino sugar and nucleotide sugar metabolism)
PC-3p-13278_910	XM_016102397.2	1327	1347	1338	-37	-25.4	0.686486	7	2-5,1346-1343;7-16,1341-1332;18-21,1330-1327	1-1,1347-1347[UP5];6-6,1342-1342[SIL];17-17,1331-1331[SIL]	((((.((((((((((.((((.&.)))).)))))))))).))))	GUCGCGAACAGCUUGGCGGAU&UUUUGGCAAGCUGUUCUUGGC	2	53.6509	3	0.754258	Output/S24h/cleaveLand_result/t_plot/PC-3p-13278_910_XM_016102397.2_1338_TPlot.pdf	1	30.281	4	0.999996	Output/S0h/cleaveLand_result/t_plot/PC-3p-13278_910_XM_016102397.2_1338_TPlot.pdf	53.6509	30.281	0.82519	up	0.010743	0.0115483	yes	GO:2000112(regulation of cellular macromolecule biosynthetic process);GO:1903506(regulation of nucleic acid-templated transcription);GO:0009867(jasmonic acid mediated signaling pathway);GO:0031323(regulation of cellular metabolic process);GO:0097305(response to alcohol);GO:2000241(regulation of reproductive process);GO:0065007(biological regulation);GO:0009968(negative regulation of signal transd…	ko04075(Plant hormone signal transduction)
PC-3p-13278_910	XM_016103066.2	4348	4369	4361	-37	-25.2	0.681081	7	2-8,4368-4362;10-14,4361-4357;15-21,4354-4348	1-1,4369-4369[UP5];9-9,x-x[BULq];x-x,4356-4355[BULt]	(((((((..(((((-(((((((.&.))))))).)))))--)))))))	GCUAAGGUUACAGC-UGCCAGAC&UUUUGGCAAGCUGU--UCUUGGC	1	26.8255	4	1	Output/S24h/cleaveLand_result/t_plot/PC-3p-13278_910_XM_016103066.2_4361_TPlot.pdf	0	0	NA	NA	NA	26.8255	0	Inf	up	2.2264e-07	2.56268e-07	yes	GO:1901564(organonitrogen compound metabolic process);GO:0044260(cellular macromolecule metabolic process);GO:0043170(macromolecule metabolic process);GO:0044238(primary metabolic process);GO:0003824(catalytic activity);GO:0071840(cellular component organization or biogenesis);GO:0019538(protein metabolic process);GO:0006355(regulation of transcription, DNA-templated);GO:0043231(intracellular mem…	NA
PC-3p-13278_910	XM_016103216.2	1014	1040	1029	-37	-24.18	0.653514	14.5	1-7,1040-1034;10-14,1029-1025;15-21,1020-1014	8-9,1033-1030[AILt];x-x,1024-1021[BULt]	(((((((....(((((....(((((((&)))))))--..)))))----)))))))	GCCAGGAAUGCGCAGCAGCAGCCAGAG&UUUUGGC--AAGCUGU----UCUUGGC	0	0	NA	NA	NA	1	30.281	4	1	Output/S0h/cleaveLand_result/t_plot/PC-3p-13278_910_XM_016103216.2_1029_TPlot.pdf	0	30.281	-Inf	down	3.7368e-08	6.97196e-08	yes	NA	NA
PC-3p-13278_910	XM_016103323.2	1113	1134	1125	-37	-24.8	0.67027	5.5	2-6,1133-1129;8-19,1127-1116;20-21,1114-1113	1-1,1134-1134[UP5];7-7,1128-1128[SIL];x-x,1115-1115[BULt]	((.((((((((((((.(((((.&.))))).))))))))))))-))	GCACAAGAGCAGCUUAUCAAAU&UUUUGGCAAGCUGUUCUUG-GC	2	53.6509	2	0.999865	Output/S24h/cleaveLand_result/t_plot/PC-3p-13278_910_XM_016103323.2_1125_TPlot.pdf	2	60.562	2	0.999588	Output/S0h/cleaveLand_result/t_plot/PC-3p-13278_910_XM_016103323.2_1125_TPlot.pdf	53.6509	60.562	-0.17481	down	0.51783	0.542462	yes	GO:1903506(regulation of nucleic acid-templated transcription);GO:0097159(organic cyclic compound binding);GO:0050794(regulation of cellular process);GO:0031326(regulation of cellular biosynthetic process);GO:2000112(regulation of cellular macromolecule biosynthetic process);GO:0006355(regulation of transcription, DNA-templated);GO:0080090(regulation of primary metabolic process);GO:0060255(regul…	ko04141(Protein processing in endoplasmic reticulum);ko04016(MAPK signaling pathway - plant)
PC-3p-13278_910	XM_016103363.2	2655	2674	2666	-37	-25.6	0.691892	9.5	3-7,2672-2668;10-21,2666-2655	1-2,2674-2673[UP5];8-9,2667-2667[AILq]	((((((((((((.-(((((..&..)))))..))))))))))))	GCCAAGAAUGGUG-GCCAAUU&UUUUGGCAAGCUGUUCUUGGC	0	0	NA	NA	NA	2	60.562	2	0.971005	Output/S0h/cleaveLand_result/t_plot/PC-3p-13278_910_XM_016103363.2_2666_TPlot.pdf	0	60.562	-Inf	down	7.123e-15	4.42666e-14	yes	GO:0036094(small molecule binding);GO:0005488(binding);GO:1901265(nucleoside phosphate binding);GO:0003723(RNA binding);GO:0000166(nucleotide binding);GO:0097159(organic cyclic compound binding);GO:0003676(nucleic acid binding);GO:1901363(heterocyclic compound binding)	NA
PC-3p-13278_910	XM_016104789.2	322	344	335	-37	-25.6	0.691892	11	5-12,340-333;14-17,331-328;18-21,325-322	1-4,344-341[UP5];13-13,332-332[SIL];x-x,327-326[BULt]	((((..((((.((((((((....&....)))))))).))))--))))	GCCGACAGAGGAGCUUGCCUCCG&UUUUGGCAAGCUGUUCU--UGGC	1	26.8255	4	0.999996	Output/S24h/cleaveLand_result/t_plot/PC-3p-13278_910_XM_016104789.2_335_TPlot.pdf	0	0	NA	NA	NA	26.8255	0	Inf	up	2.2264e-07	2.56268e-07	yes	GO:0050789(regulation of biological process);GO:0030234(enzyme regulator activity);GO:0006810(transport);GO:0060341(regulation of cellular localization);GO:0060589(nucleoside-triphosphatase regulator activity);GO:0044425(membrane part);GO:0048209(regulation of vesicle targeting, to, from or within Golgi);GO:0009306(protein secretion);GO:0016491(oxidoreductase activity);GO:0016628(oxidoreductase a…	ko04141(Protein processing in endoplasmic reticulum)
PC-3p-13278_910	XM_016105742.2	723	747	734	-37	-25.56	0.690811	19	4-7,744-741;10-21,734-723	1-3,747-745[UP5];8-9,740-735[AILt]	((((((((((((......((((...&...))))----..))))))))))))	GCCAGGAGCAGUCCUGUGGCCACCG&UUUUGGC----AAGCUGUUCUUGGC	4	107.302	2	0.987925	Output/S24h/cleaveLand_result/t_plot/PC-3p-13278_910_XM_016105742.2_734_TPlot.pdf	0	0	NA	NA	NA	107.302	0	Inf	up	3.8116e-25	8.17156e-24	yes	NA	NA
PC-3p-13278_910	XM_016106246.2	662	688	679	-37	-24.1	0.651351	16.5	1-12,688-677;13-20,670-663	x-x,676-671[BULt];21-21,662-662[UP3]	.((((((((......((((((((((((&))))))))))))------)))))))).	UCCAGGGGCUUCUUCAGCUUGCUAAGA&UUUUGGCAAGCU------GUUCUUGGC	1	26.8255	4	1	Output/S24h/cleaveLand_result/t_plot/PC-3p-13278_910_XM_016106246.2_679_TPlot.pdf	0	0	NA	NA	NA	26.8255	0	Inf	up	2.2264e-07	2.56268e-07	yes	GO:0046914(transition metal ion binding);GO:0097159(organic cyclic compound binding);GO:0008270(zinc ion binding);GO:0003676(nucleic acid binding);GO:0043169(cation binding);GO:0046872(metal ion binding);GO:0005488(binding);GO:1901363(heterocyclic compound binding);GO:0043167(ion binding)	NA
PC-3p-13278_910	XM_016106734.2	2236	2255	2247	-37	-24.1	0.651351	8	3-5,2253-2251;7-8,2249-2248;10-12,2247-2245;14-21,2243-2236	1-2,2255-2254[UP5];6-6,2250-2250[SIL];9-9,x-x[BULq];13-13,2244-2244[SIL]	((((((((.(((-((.(((..&..))).)).))).))))))))	GCCAAGAAGAGC-UGGCAACC&UUUUGGCAAGCUGUUCUUGGC	0	0	NA	NA	NA	2	60.562	2	0.999995	Output/S0h/cleaveLand_result/t_plot/PC-3p-13278_910_XM_016106734.2_2247_TPlot.pdf	0	60.562	-Inf	down	7.123e-15	4.42666e-14	yes	GO:0016020(membrane)	ko00600(Sphingolipid metabolism);ko01100(Metabolic pathways)
PC-3p-13278_910	XM_016107099.2	1371	1392	1383	-37	-25.1	0.678378	9.5	1-11,1392-1382;13-21,1379-1371	12-12,1381-1380[AILt]	(((((((((..(((((((((((&)))))))))))-.)))))))))	GCCAGGGAUUUGUUUGCUGAGA&UUUUGGCAAGC-UGUUCUUGGC	1	26.8255	4	1	Output/S24h/cleaveLand_result/t_plot/PC-3p-13278_910_XM_016107099.2_1383_TPlot.pdf	0	0	NA	NA	NA	26.8255	0	Inf	up	2.2264e-07	2.56268e-07	yes	NA	NA
PC-3p-13278_910	XM_016107255.2	481	501	492	-37	-24.7	0.667568	6.5	1-9,501-493;11-18,491-484;21-21,481-481	10-10,492-492[SIL];19-20,483-482[SIL]	(..((((((((.(((((((((&))))))))).))))))))..)	GAAAAGGGCAGGUUGCCAGAG&UUUUGGCAAGCUGUUCUUGGC	2	53.6509	2	0.999907	Output/S24h/cleaveLand_result/t_plot/PC-3p-13278_910_XM_016107255.2_492_TPlot.pdf	0	0	NA	NA	NA	53.6509	0	Inf	up	2.3929e-13	9.82167e-13	yes	GO:0006793(phosphorus metabolic process);GO:0032555(purine ribonucleotide binding);GO:0016740(transferase activity);GO:0008152(metabolic process);GO:1901363(heterocyclic compound binding);GO:0016310(phosphorylation);GO:0006796(phosphate-containing compound metabolic process);GO:0006468(protein phosphorylation);GO:0035639(purine ribonucleoside triphosphate binding);GO:1901265(nucleoside phosphate …	NA
PC-3p-13278_910	XM_016108263.2	529	550	540	-37	-25.1	0.678378	7.5	1-7,550-544;9-12,541-538;14-21,536-529	8-8,543-542[AILt];13-13,537-537[SIL]	((((((((.((((..(((((((&)))))))-.)))).))))))))	GCCGGGAAAAGCUCAGCCAGAG&UUUUGGC-AAGCUGUUCUUGGC	8	214.604	2	0.998123	Output/S24h/cleaveLand_result/t_plot/PC-3p-13278_910_XM_016108263.2_540_TPlot.pdf	0	0	NA	NA	NA	214.604	0	Inf	up	1.3442e-48	1.12415e-46	yes	NA	ko04075(Plant hormone signal transduction);ko01100(Metabolic pathways);ko01230(Biosynthesis of amino acids);ko01110(Biosynthesis of secondary metabolites);ko00020(Citrate cycle (TCA cycle));ko00630(Glyoxylate and dicarboxylate metabolism);ko01210(2-Oxocarboxylic acid metabolism);ko01200(Carbon metabolism);ko04016(MAPK signaling pathway - plant)
PC-3p-13278_910	XM_016108368.2	782	802	793	-37	-24.8	0.67027	4	1-13,802-790;15-16,788-787;18-20,785-783	14-14,789-789[SIL];17-17,786-786[SIL];21-21,782-782[UP3]	.(((.((.(((((((((((((&))))))))))))).)).))).	ACCAUGAUCAGCUUGUCAAAA&UUUUGGCAAGCUGUUCUUGGC	1	26.8255	4	1	Output/S24h/cleaveLand_result/t_plot/PC-3p-13278_910_XM_016108368.2_793_TPlot.pdf	0	0	NA	NA	NA	26.8255	0	Inf	up	2.2264e-07	2.56268e-07	yes	GO:0005524(ATP binding);GO:1901363(heterocyclic compound binding);GO:1901564(organonitrogen compound metabolic process);GO:0043170(macromolecule metabolic process);GO:0008152(metabolic process);GO:0003824(catalytic activity);GO:0044237(cellular metabolic process);GO:0032555(purine ribonucleotide binding);GO:0043167(ion binding);GO:0036211(protein modification process);GO:0006468(protein phosphory…	ko03008(Ribosome biogenesis in eukaryotes);ko04712(Circadian rhythm - plant)
PC-3p-13278_910	XM_016111091.2	608	630	621	-37	-24.2	0.654054	9.5	1-12,630-619;13-15,616-614;18-21,611-608	x-x,618-617[BULt];16-17,613-612[SIL]	((((..(((..((((((((((((&))))))))))))--)))..))))	GCCGUCGGCGAGGCUUGCCAGAA&UUUUGGCAAGCU--GUUCUUGGC	3	80.4764	2	0.999998	Output/S24h/cleaveLand_result/t_plot/PC-3p-13278_910_XM_016111091.2_621_TPlot.pdf	4	121.124	2	0.999991	Output/S0h/cleaveLand_result/t_plot/PC-3p-13278_910_XM_016111091.2_621_TPlot.pdf	80.4764	121.124	-0.589847	down	0.0041974	0.00461483	yes	GO:0004471(malate dehydrogenase (decarboxylating) (NAD+) activity);GO:0050662(coenzyme binding);GO:0036094(small molecule binding);GO:0006082(organic acid metabolic process);GO:1901363(heterocyclic compound binding);GO:0016614(oxidoreductase activity, acting on CH-OH group of donors);GO:1901265(nucleoside phosphate binding);GO:0004470(malic enzyme activity);GO:0043648(dicarboxylic acid metabolic …	ko01100(Metabolic pathways);ko00620(Pyruvate metabolism);ko01200(Carbon metabolism);ko00710(Carbon fixation in photosynthetic organisms)
PC-3p-13278_910	XM_016112574.2	939	959	950	-37	-26.3	0.710811	7	2-4,958-956;6-21,954-939	1-1,959-959[UP5];5-5,955-955[SIL]	((((((((((((((((.(((.&.))).))))))))))))))))	GUUGAGGACAGCUUGUGAGAG&UUUUGGCAAGCUGUUCUUGGC	1	26.8255	4	0.997617	Output/S24h/cleaveLand_result/t_plot/PC-3p-13278_910_XM_016112574.2_950_TPlot.pdf	3	90.843	3	0.407629	Output/S0h/cleaveLand_result/t_plot/PC-3p-13278_910_XM_016112574.2_950_TPlot.pdf	26.8255	90.843	-1.75977	down	3.5964e-09	1.3875e-08	yes	GO:0005488(binding);GO:0030554(adenyl nucleotide binding);GO:0097159(organic cyclic compound binding);GO:0043167(ion binding);GO:1901265(nucleoside phosphate binding);GO:0043168(anion binding);GO:1901363(heterocyclic compound binding);GO:0017076(purine nucleotide binding);GO:0036094(small molecule binding);GO:0032559(adenyl ribonucleotide binding);GO:0005524(ATP binding);GO:0097367(carbohydrate d…	ko04141(Protein processing in endoplasmic reticulum);ko04144(Endocytosis);ko03040(Spliceosome)
PC-3p-13278_910	XM_016113911.2	275	299	290	-37	-27.8	0.751351	8.5	1-12,299-288;14-14,286-286;15-21,281-275	13-13,287-287[SIL];x-x,285-282[BULt]	(((((((....(.((((((((((((&)))))))))))).)----)))))))	GCCGAGGUUCUGGAGCUUGCCGGAA&UUUUGGCAAGCUGU----UCUUGGC	3	80.4764	2	0.521724	Output/S24h/cleaveLand_result/t_plot/PC-3p-13278_910_XM_016113911.2_290_TPlot.pdf	3	90.843	2	0.475414	Output/S0h/cleaveLand_result/t_plot/PC-3p-13278_910_XM_016113911.2_290_TPlot.pdf	80.4764	90.843	-0.17481	down	0.42833	0.452615	yes	GO:0005634(nucleus);GO:0031323(regulation of cellular metabolic process);GO:0040029(regulation of gene expression, epigenetic);GO:0097159(organic cyclic compound binding);GO:0044428(nuclear part);GO:0071840(cellular component organization or biogenesis);GO:0016043(cellular component organization);GO:0000785(chromatin);GO:0000228(nuclear chromosome);GO:0006342(chromatin silencing);GO:0046982(prote…	NA
PC-3p-13278_910	XM_016114107.2	947	970	961	-37	-25.24	0.682162	8	3-14,968-957;16-20,952-948	1-2,970-969[UP5];15-15,956-953[AILt];21-21,947-947[UP3]	.(((((....((((((((((((..&..))))))))))))---.))))).	UCCAAGCAGCACAGCUUGCCAAUC&UUUUGGCAAGCUGU---UCUUGGC	2	53.6509	2	0.995899	Output/S24h/cleaveLand_result/t_plot/PC-3p-13278_910_XM_016114107.2_961_TPlot.pdf	0	0	NA	NA	NA	53.6509	0	Inf	up	2.3929e-13	9.82167e-13	yes	NA	ko03018(RNA degradation)
PC-3p-13278_910	XM_016114330.2	186	207	197	-37	-25.52	0.68973	12	3-7,205-201;11-21,196-186	1-2,207-206[UP5];8-10,200-197[AILt]	(((((((((((....(((((..&..)))))-...)))))))))))	GCCAAGGGCAGAAACGCCAAUC&UUUUGGC-AAGCUGUUCUUGGC	0	0	NA	NA	NA	1	30.281	4	0.999988	Output/S0h/cleaveLand_result/t_plot/PC-3p-13278_910_XM_016114330.2_197_TPlot.pdf	0	30.281	-Inf	down	3.7368e-08	6.97196e-08	yes	GO:1901363(heterocyclic compound binding);GO:0005488(binding);GO:0097159(organic cyclic compound binding);GO:0003676(nucleic acid binding)	ko03008(Ribosome biogenesis in eukaryotes);ko03013(RNA transport)
PC-3p-13278_910	XM_016114886.1	747	767	758	-37	-26.3	0.710811	4.5	2-10,766-758;12-19,756-749;21-21,747-747	1-1,767-767[UP5];11-11,757-757[SIL];20-20,748-748[SIL]	(.((((((((.(((((((((.&.))))))))).)))))))).)	GGCGAGAACAACUUGCCAAAC&UUUUGGCAAGCUGUUCUUGGC	0	0	NA	NA	NA	1	30.281	4	0.995534	Output/S0h/cleaveLand_result/t_plot/PC-3p-13278_910_XM_016114886.1_758_TPlot.pdf	0	30.281	-Inf	down	3.7368e-08	6.97196e-08	yes	NA	ko00270(Cysteine and methionine metabolism);ko01100(Metabolic pathways)
PC-3p-13278_910	XM_016114902.2	3399	3418	3409	-37	-27.5	0.743243	6.5	3-11,3416-3408;13-17,3406-3402;19-21,3401-3399	1-2,3418-3417[UP5];12-12,3407-3407[SIL];18-18,x-x[BULq]	(((-(((((.(((((((((..&..))))))))).))))).)))	GCC-AGAGCUGCUUGCCAACA&UUUUGGCAAGCUGUUCUUGGC	1	26.8255	4	0.915958	Output/S24h/cleaveLand_result/t_plot/PC-3p-13278_910_XM_016114902.2_3409_TPlot.pdf	0	0	NA	NA	NA	26.8255	0	Inf	up	2.2264e-07	2.56268e-07	yes	NA	ko03410(Base excision repair)
PC-3p-13278_910	XM_016115446.2	240	258	251	-37	-24.9	0.672973	8.5	2-7,257-252;10-19,251-242;21-21,240-240	1-1,258-258[UP5];8-9,x-x[BULq];20-20,241-241[SIL]	(.((((((((((--((((((.&.))))))..)))))))))).)	GGCAAGAGCAGC--GCCGAGG&UUUUGGCAAGCUGUUCUUGGC	0	0	NA	NA	NA	3	90.843	3	0.854559	Output/S0h/cleaveLand_result/t_plot/PC-3p-13278_910_XM_016115446.2_251_TPlot.pdf	0	90.843	-Inf	down	1.5521e-21	2.37866e-20	yes	GO:0044464(cell part);GO:0006082(organic acid metabolic process);GO:0046872(metal ion binding);GO:0016740(transferase activity);GO:0050667(homocysteine metabolic process);GO:0006807(nitrogen compound metabolic process);GO:0000097(sulfur amino acid biosynthetic process);GO:0044272(sulfur compound biosynthetic process);GO:1901607(alpha-amino acid biosynthetic process);GO:0003824(catalytic activity)…	ko01100(Metabolic pathways);ko01230(Biosynthesis of amino acids);ko00270(Cysteine and methionine metabolism);ko01110(Biosynthesis of secondary metabolites);ko00450(Selenocompound metabolism)
PC-3p-13278_910	XM_016116271.2	1016	1043	1034	-37	-24.9	0.672973	19	1-11,1043-1033;12-12,1025-1025;14-21,1023-1016	x-x,1032-1026[BULt];13-13,1024-1024[SIL]	((((((((.(.......(((((((((((&)))))))))))-------).))))))))	GCUAAGAGGGUUUUGACGCUUGCCGAGA&UUUUGGCAAGC-------UGUUCUUGGC	2	53.6509	3	0.870776	Output/S24h/cleaveLand_result/t_plot/PC-3p-13278_910_XM_016116271.2_1034_TPlot.pdf	1	30.281	4	1	Output/S0h/cleaveLand_result/t_plot/PC-3p-13278_910_XM_016116271.2_1034_TPlot.pdf	53.6509	30.281	0.82519	up	0.010743	0.0115483	yes	GO:1901576(organic substance biosynthetic process);GO:0043226(organelle);GO:0008483(transaminase activity);GO:0044283(small molecule biosynthetic process);GO:0005737(cytoplasm);GO:0044249(cellular biosynthetic process);GO:0032787(monocarboxylic acid metabolic process);GO:0019438(aromatic compound biosynthetic process);GO:0006807(nitrogen compound metabolic process);GO:0044464(cell part);GO:000608…	ko00790(Folate biosynthesis)
PC-3p-13278_910	XM_016116409.2	2009	2030	2021	-37	-24.4	0.659459	9	4-13,2027-2018;14-20,2016-2010	1-3,2030-2028[UP5];x-x,2017-2017[BULt];21-21,2009-2009[UP3]	.(((((((.((((((((((...&...))))))))))-))))))).	ACUGGGGAUCAGCUUGCCAUCG&UUUUGGCAAGCUG-UUCUUGGC	1	26.8255	4	1	Output/S24h/cleaveLand_result/t_plot/PC-3p-13278_910_XM_016116409.2_2021_TPlot.pdf	2	60.562	2	0.999968	Output/S0h/cleaveLand_result/t_plot/PC-3p-13278_910_XM_016116409.2_2021_TPlot.pdf	26.8255	60.562	-1.17481	down	0.00030739	0.000341326	yes	GO:0043226(organelle);GO:0065007(biological regulation);GO:0022853(active ion transmembrane transporter activity);GO:0042626(ATPase activity, coupled to transmembrane movement of substances);GO:0016817(hydrolase activity, acting on acid anhydrides);GO:0006793(phosphorus metabolic process);GO:0022890(inorganic cation transmembrane transporter activity);GO:0006796(phosphate-containing compound meta…	ko00190(Oxidative phosphorylation)
PC-3p-13278_910	XM_016116955.2	462	482	473	-37	-24.3	0.656757	9	2-9,481-474;12-21,471-462	1-1,482-482[UP5];10-11,473-472[SIL]	((((((((((..((((((((.&.))))))))..))))))))))	GUCGGGGACAAGUUGCCGGAG&UUUUGGCAAGCUGUUCUUGGC	17	456.033	2	0.999997	Output/S24h/cleaveLand_result/t_plot/PC-3p-13278_910_XM_016116955.2_473_TPlot.pdf	20	605.62	2	0.999984	Output/S0h/cleaveLand_result/t_plot/PC-3p-13278_910_XM_016116955.2_473_TPlot.pdf	456.033	605.62	-0.409275	down	4.3866e-06	4.99113e-06	yes	GO:0009057(macromolecule catabolic process);GO:0006807(nitrogen compound metabolic process);GO:0005576(extracellular region);GO:0043227(membrane-bounded organelle);GO:0009987(cellular process);GO:0016021(integral component of membrane);GO:0070011(peptidase activity, acting on L-amino acid peptides);GO:0009056(catabolic process);GO:0005622(intracellular);GO:0004197(cysteine-type endopeptidase acti…	ko04145(Phagosome)
PC-3p-13278_910	XM_016116980.2	1037	1055	1046	-37	-28.6	0.772973	4.5	2-12,1054-1044;15-21,1043-1037	1-1,1055-1055[UP5];13-14,x-x[BULq]	(((((((--(((((((((((.&.)))))))))))..)))))))	GCCAGGA--AGCUUGCCAGAC&UUUUGGCAAGCUGUUCUUGGC	0	0	NA	NA	NA	1	30.281	4	0.532448	Output/S0h/cleaveLand_result/t_plot/PC-3p-13278_910_XM_016116980.2_1046_TPlot.pdf	0	30.281	-Inf	down	3.7368e-08	6.97196e-08	yes	NA	NA
PC-3p-13278_910	XM_016117284.2	2214	2237	2228	-37	-27.5	0.743243	8.5	3-14,2235-2224;15-16,2220-2219;18-21,2217-2214	1-2,2237-2236[UP5];x-x,2223-2221[BULt];17-17,2218-2218[SIL]	((((.((...((((((((((((..&..))))))))))))---)).))))	GCCAUGACAUGCGGCUUGCCAACC&UUUUGGCAAGCUGU---UCUUGGC	2	53.6509	3	0.220075	Output/S24h/cleaveLand_result/t_plot/PC-3p-13278_910_XM_016117284.2_2228_TPlot.pdf	2	60.562	3	0.194988	Output/S0h/cleaveLand_result/t_plot/PC-3p-13278_910_XM_016117284.2_2228_TPlot.pdf	53.6509	60.562	-0.17481	down	0.51783	0.542462	yes	GO:0016757(transferase activity, transferring glycosyl groups);GO:0051704(multi-organism process);GO:0009311(oligosaccharide metabolic process);GO:0009877(nodulation);GO:0044419(interspecies interaction between organisms);GO:0044237(cellular metabolic process);GO:0008194(UDP-glycosyltransferase activity);GO:0046527(glucosyltransferase activity);GO:0005984(disaccharide metabolic process);GO:000815…	ko01100(Metabolic pathways);ko00500(Starch and sucrose metabolism)
PC-3p-13278_910	XM_016117292.2	1785	1809	1796	-37	-25.86	0.698919	13.5	1-9,1809-1801;12-21,1794-1785	10-11,1800-1795[AILt]	((((((((((......(((((((((&)))))))))----..))))))))))	GCCAGGAACAAAUUGAUUGCCAGAA&UUUUGGCAA----GCUGUUCUUGGC	0	0	NA	NA	NA	1	30.281	4	0.999618	Output/S0h/cleaveLand_result/t_plot/PC-3p-13278_910_XM_016117292.2_1796_TPlot.pdf	0	30.281	-Inf	down	3.7368e-08	6.97196e-08	yes	GO:0016020(membrane);GO:0016021(integral component of membrane);GO:0031224(intrinsic component of membrane);GO:0044425(membrane part)	ko01100(Metabolic pathways);ko00600(Sphingolipid metabolism)
PC-3p-13278_910	XM_016117984.2	537	557	548	-37	-25.5	0.689189	6	1-4,557-554;6-20,552-538	5-5,553-553[SIL];21-21,537-537[UP3]	.(((((((((((((((.((((&)))).))))))))))))))).	ACCAAGAAUGGCUUGCAGAAG&UUUUGGCAAGCUGUUCUUGGC	1	26.8255	4	0.999998	Output/S24h/cleaveLand_result/t_plot/PC-3p-13278_910_XM_016117984.2_548_TPlot.pdf	4	121.124	0	0.11009	Output/S0h/cleaveLand_result/t_plot/PC-3p-13278_910_XM_016117984.2_548_TPlot.pdf	26.8255	121.124	-2.17481	down	8.9815e-15	5.46095e-14	yes	GO:0003824(catalytic activity);GO:0043170(macromolecule metabolic process);GO:0019538(protein metabolic process);GO:0036094(small molecule binding);GO:0097367(carbohydrate derivative binding);GO:0017076(purine nucleotide binding);GO:0032555(purine ribonucleotide binding);GO:0005488(binding);GO:0043168(anion binding);GO:0044238(primary metabolic process);GO:0032553(ribonucleotide binding);GO:00163…	NA
PC-3p-13278_910	XM_016117985.2	536	556	547	-37	-25.5	0.689189	6	1-4,556-553;6-20,551-537	5-5,552-552[SIL];21-21,536-536[UP3]	.(((((((((((((((.((((&)))).))))))))))))))).	ACCAAGAAUGGCUUGCAGAAG&UUUUGGCAAGCUGUUCUUGGC	1	26.8255	4	0.999999	Output/S24h/cleaveLand_result/t_plot/PC-3p-13278_910_XM_016117985.2_547_TPlot.pdf	2	60.562	2	0.983321	Output/S0h/cleaveLand_result/t_plot/PC-3p-13278_910_XM_016117985.2_547_TPlot.pdf	26.8255	60.562	-1.17481	down	0.00030739	0.000341326	yes	GO:0003824(catalytic activity);GO:0043170(macromolecule metabolic process);GO:0019538(protein metabolic process);GO:0036094(small molecule binding);GO:0097367(carbohydrate derivative binding);GO:0017076(purine nucleotide binding);GO:0032555(purine ribonucleotide binding);GO:0005488(binding);GO:0043168(anion binding);GO:0044238(primary metabolic process);GO:0032553(ribonucleotide binding);GO:00163…	NA
PC-3p-13278_910	XM_021126125.1	288	309	299	-37	-25.8	0.697297	12	5-9,305-301;10-21,299-288	1-4,309-306[UP5];x-x,300-300[BULt]	((((((((((((.(((((....&....)))))-))))))))))))	GCCAGGAGCAGCUUUGUUCCUC&UUUUGGCAA-GCUGUUCUUGGC	1	26.8255	4	0.999919	Output/S24h/cleaveLand_result/t_plot/PC-3p-13278_910_XM_021126125.1_299_TPlot.pdf	0	0	NA	NA	NA	26.8255	0	Inf	up	2.2264e-07	2.56268e-07	yes	NA	NA
PC-3p-13278_910	XM_021126167.1	1163	1183	1174	-37	-27.4	0.740541	7.5	4-13,1180-1171;15-16,1169-1168;18-21,1166-1163	1-3,1183-1181[UP5];14-14,1170-1170[SIL];17-17,1167-1167[SIL]	((((.((.((((((((((...&...)))))))))).)).))))	GCCGCGAUCAGCUUGCCAUCA&UUUUGGCAAGCUGUUCUUGGC	2	53.6509	2	0.598754	Output/S24h/cleaveLand_result/t_plot/PC-3p-13278_910_XM_021126167.1_1174_TPlot.pdf	0	0	NA	NA	NA	53.6509	0	Inf	up	2.3929e-13	9.82167e-13	yes	GO:0015197(peptide transporter activity);GO:0051641(cellular localization);GO:0019899(enzyme binding);GO:0005829(cytosol);GO:0005635(nuclear envelope);GO:0015031(protein transport);GO:0017038(protein import);GO:0008536(Ran GTPase binding);GO:0043229(intracellular organelle);GO:0051234(establishment of localization);GO:0044424(intracellular part);GO:0051179(localization);GO:0005488(binding);GO:005…	NA
PC-3p-13278_910	XM_021126398.1	611	632	623	-37	-24.6	0.664865	10	5-12,628-621;14-18,619-615;19-21,613-611	1-4,632-629[UP5];13-13,620-620[SIL];x-x,614-614[BULt]	(((.(((((.((((((((....&....)))))))).)))))-)))	GCCGAAGAAGAGUUUGCCCGAG&UUUUGGCAAGCUGUUCUU-GGC	0	0	NA	NA	NA	1	30.281	4	1	Output/S0h/cleaveLand_result/t_plot/PC-3p-13278_910_XM_021126398.1_623_TPlot.pdf	0	30.281	-Inf	down	3.7368e-08	6.97196e-08	yes	GO:0016787(hydrolase activity);GO:0003824(catalytic activity)	ko01110(Biosynthesis of secondary metabolites);ko00130(Ubiquinone and other terpenoid-quinone biosynthesis);ko04120(Ubiquitin mediated proteolysis);ko04146(Peroxisome);ko01100(Metabolic pathways);ko00590(Arachidonic acid metabolism)
PC-3p-13278_910	XM_021126602.1	1182	1199	1193	-37	-26.7	0.721622	7	1-6,1199-1194;10-21,1193-1182	7-9,x-x[BULq]	((((((((((((---((((((&))))))...))))))))))))	GCCAAGAACAGC---CCAGAA&UUUUGGCAAGCUGUUCUUGGC	0	0	NA	NA	NA	2	60.562	3	0.310957	Output/S0h/cleaveLand_result/t_plot/PC-3p-13278_910_XM_021126602.1_1193_TPlot.pdf	0	60.562	-Inf	down	7.123e-15	4.42666e-14	yes	GO:0016020(membrane);GO:0016798(hydrolase activity, acting on glycosyl bonds);GO:0016021(integral component of membrane);GO:0006810(transport);GO:0008152(metabolic process);GO:0005215(transporter activity);GO:0044425(membrane part);GO:0102483(scopolin beta-glucosidase activity);GO:0003824(catalytic activity);GO:0071704(organic substance metabolic process);GO:0044238(primary metabolic process);GO:…	ko01110(Biosynthesis of secondary metabolites);ko00500(Starch and sucrose metabolism);ko01100(Metabolic pathways);ko00460(Cyanoamino acid metabolism);ko00940(Phenylpropanoid biosynthesis)
PC-3p-13278_910	XM_021126663.1	657	678	669	-37	-25	0.675676	9.5	3-7,676-672;10-19,669-660;20-21,658-657	1-2,678-677[UP5];8-9,671-670[SIL];x-x,659-659[BULt]	((.((((((((((..(((((..&..)))))..))))))))))-))	GCUCAAGGACGGCACGCCAAUC&UUUUGGCAAGCUGUUCUUG-GC	0	0	NA	NA	NA	1	30.281	4	1	Output/S0h/cleaveLand_result/t_plot/PC-3p-13278_910_XM_021126663.1_669_TPlot.pdf	0	30.281	-Inf	down	3.7368e-08	6.97196e-08	yes	GO:0044425(membrane part);GO:0031224(intrinsic component of membrane);GO:0016020(membrane);GO:0016021(integral component of membrane)	NA
PC-3p-13278_910	XM_021128895.1	352	373	364	-37	-24.3	0.656757	8	2-15,372-359;16-18,357-355;20-21,353-352	1-1,373-373[UP5];x-x,358-358[BULt];19-19,354-354[SIL]	((.(((.((((((((((((((.&.))))))))))))))-))).))	GCGGAGAAGCGGUUUGCUGAAG&UUUUGGCAAGCUGUU-CUUGGC	0	0	NA	NA	NA	1	30.281	4	1	Output/S0h/cleaveLand_result/t_plot/PC-3p-13278_910_XM_021128895.1_364_TPlot.pdf	0	30.281	-Inf	down	3.7368e-08	6.97196e-08	yes	GO:0010556(regulation of macromolecule biosynthetic process);GO:0090304(nucleic acid metabolic process);GO:0018130(heterocycle biosynthetic process);GO:1901360(organic cyclic compound metabolic process);GO:1903506(regulation of nucleic acid-templated transcription);GO:0005488(binding);GO:0046483(heterocycle metabolic process);GO:0006351(transcription, DNA-templated);GO:0032774(RNA biosynthetic pr…	NA
PC-3p-13278_910	XM_021129934.1	358	377	369	-37	-25.1	0.678378	12.5	5-7,373-371;10-21,369-358	1-4,377-374[UP5];8-9,370-370[AILq]	((((((((((((.-(((....&....)))..))))))))))))	GCCAGGAACAGUA-GCCCUUC&UUUUGGCAAGCUGUUCUUGGC	0	0	NA	NA	NA	1	30.281	4	1	Output/S0h/cleaveLand_result/t_plot/PC-3p-13278_910_XM_021129934.1_369_TPlot.pdf	0	30.281	-Inf	down	3.7368e-08	6.97196e-08	yes	GO:0044424(intracellular part);GO:0005623(cell);GO:0043226(organelle);GO:0043229(intracellular organelle);GO:0005622(intracellular);GO:0044464(cell part);GO:0005694(chromosome);GO:0043228(non-membrane-bounded organelle);GO:0005488(binding);GO:0043232(intracellular non-membrane-bounded organelle)	NA
PC-3p-13278_910	XM_021131374.1	938	956	947	-37	-25.8	0.697297	9	5-12,952-945;15-21,944-938	1-4,956-953[UP5];13-14,x-x[BULq]	(((((((--((((((((....&....))))))))..)))))))	GCCAAGA--AGCUUGCCUUGG&UUUUGGCAAGCUGUUCUUGGC	0	0	NA	NA	NA	1	30.281	4	0.999627	Output/S0h/cleaveLand_result/t_plot/PC-3p-13278_910_XM_021131374.1_947_TPlot.pdf	0	30.281	-Inf	down	3.7368e-08	6.97196e-08	yes	GO:0016020(membrane);GO:0016021(integral component of membrane);GO:0031224(intrinsic component of membrane);GO:0044425(membrane part)	NA
PC-3p-13278_910	XM_021131644.1	2554	2573	2565	-37	-24.8	0.67027	9	4-8,2570-2566;10-14,2565-2561;16-21,2559-2554	1-3,2573-2571[UP5];9-9,x-x[BULq];15-15,2560-2560[SIL]	((((((.(((((-(((((...&...))))).))))).))))))	GUCAAGUGCAGC-UGCCACUA&UUUUGGCAAGCUGUUCUUGGC	1	26.8255	4	1	Output/S24h/cleaveLand_result/t_plot/PC-3p-13278_910_XM_021131644.1_2565_TPlot.pdf	0	0	NA	NA	NA	26.8255	0	Inf	up	2.2264e-07	2.56268e-07	yes	GO:0006810(transport);GO:0051179(localization);GO:0015031(protein transport);GO:0051234(establishment of localization);GO:0005622(intracellular);GO:0034613(cellular protein localization);GO:0045184(establishment of protein localization);GO:0005623(cell);GO:0006886(intracellular protein transport);GO:0046907(intracellular transport);GO:0044464(cell part);GO:0051641(cellular localization);GO:007170…	NA
PC-3p-13278_910	XM_021137061.1	1732	1753	1744	-37	-28.1	0.759459	7.5	3-10,1751-1744;12-21,1741-1732	1-2,1753-1752[UP5];11-11,1743-1742[AILt]	((((((((((..((((((((..&..))))))))-.))))))))))	GCCGAGAACAUACUUGCCAAUG&UUUUGGCAAG-CUGUUCUUGGC	0	0	NA	NA	NA	1	30.281	4	0.634397	Output/S0h/cleaveLand_result/t_plot/PC-3p-13278_910_XM_021137061.1_1744_TPlot.pdf	0	30.281	-Inf	down	3.7368e-08	6.97196e-08	yes	GO:0043229(intracellular organelle);GO:0097659(nucleic acid-templated transcription);GO:0050794(regulation of cellular process);GO:0034645(cellular macromolecule biosynthetic process);GO:0090304(nucleic acid metabolic process);GO:0003714(transcription corepressor activity);GO:0043226(organelle);GO:0005623(cell);GO:0010605(negative regulation of macromolecule metabolic process);GO:0006725(cellular…	NA
PC-3p-13278_910	XM_021140400.1	298	320	311	-37	-25.6	0.691892	11	5-12,316-309;14-17,307-304;18-21,301-298	1-4,320-317[UP5];13-13,308-308[SIL];x-x,303-302[BULt]	((((..((((.((((((((....&....)))))))).))))--))))	GCCGACAGAGGAGCUUGCCUCCG&UUUUGGCAAGCUGUUCU--UGGC	1	26.8255	4	0.999993	Output/S24h/cleaveLand_result/t_plot/PC-3p-13278_910_XM_021140400.1_311_TPlot.pdf	0	0	NA	NA	NA	26.8255	0	Inf	up	2.2264e-07	2.56268e-07	yes	GO:0050789(regulation of biological process);GO:0030234(enzyme regulator activity);GO:0006810(transport);GO:0060341(regulation of cellular localization);GO:0060589(nucleoside-triphosphatase regulator activity);GO:0044425(membrane part);GO:0048209(regulation of vesicle targeting, to, from or within Golgi);GO:0009306(protein secretion);GO:0016491(oxidoreductase activity);GO:0016628(oxidoreductase a…	ko04141(Protein processing in endoplasmic reticulum)
PC-3p-13278_910	XM_021140420.1	540	565	552	-37	-24.4	0.659459	17.5	5-7,561-559;8-10,554-552;11-21,550-540	1-4,565-562[UP5];x-x,558-555[BULt];x-x,551-551[BULt]	(((((((((((.(((....(((....&....)))----)))-)))))))))))	GCCAAGGACAGACUUGAGAGCCUCAU&UUUUGGC----AAG-CUGUUCUUGGC	3	80.4764	2	0.999988	Output/S24h/cleaveLand_result/t_plot/PC-3p-13278_910_XM_021140420.1_552_TPlot.pdf	0	0	NA	NA	NA	80.4764	0	Inf	up	2.9371e-19	3.092e-18	yes	NA	NA
PC-3p-13278_910	XM_021141128.1	597	623	614	-37	-25.3	0.683784	10	1-14,623-610;15-21,603-597	x-x,609-604[BULt]	(((((((......((((((((((((((&))))))))))))))------)))))))	GUCAAGGUCACUAGCAGCUUGUCAAGG&UUUUGGCAAGCUGU------UCUUGGC	0	0	NA	NA	NA	1	30.281	4	0.999998	Output/S0h/cleaveLand_result/t_plot/PC-3p-13278_910_XM_021141128.1_614_TPlot.pdf	0	30.281	-Inf	down	3.7368e-08	6.97196e-08	yes	GO:0010556(regulation of macromolecule biosynthetic process);GO:0050794(regulation of cellular process);GO:0001883(purine nucleoside binding);GO:0034645(cellular macromolecule biosynthetic process);GO:0009059(macromolecule biosynthetic process);GO:0031966(mitochondrial membrane);GO:0003824(catalytic activity);GO:0043043(peptide biosynthetic process);GO:0016020(membrane);GO:0043229(intracellular o…	NA
PC-3p-13278_910	XM_021141394.1	559	580	572	-37	-24.2	0.654054	9.5	1-8,580-573;10-12,572-570;14-21,566-559	9-9,x-x[BULq];13-13,569-567[AILt]	((((((((...(((-((((((((&)))))))).)))--.))))))))	GCCAAGAAGAAGGC-UGCCAAGG&UUUUGGCAAGCU--GUUCUUGGC	3	80.4764	2	0.999998	Output/S24h/cleaveLand_result/t_plot/PC-3p-13278_910_XM_021141394.1_572_TPlot.pdf	0	0	NA	NA	NA	80.4764	0	Inf	up	2.9371e-19	3.092e-18	yes	GO:0043226(organelle);GO:0005488(binding);GO:0043231(intracellular membrane-bounded organelle);GO:0005509(calcium ion binding);GO:0043229(intracellular organelle);GO:0043169(cation binding);GO:0044444(cytoplasmic part);GO:0043227(membrane-bounded organelle);GO:0044464(cell part);GO:0044424(intracellular part);GO:0046872(metal ion binding);GO:0005623(cell);GO:0005622(intracellular);GO:0012505(endo…	ko01110(Biosynthesis of secondary metabolites);ko00860(Porphyrin and chlorophyll metabolism);ko01100(Metabolic pathways)
PC-3p-13278_910	XM_021142098.1	947	970	961	-37	-25.24	0.682162	8	3-14,968-957;16-20,952-948	1-2,970-969[UP5];15-15,956-953[AILt];21-21,947-947[UP3]	.(((((....((((((((((((..&..))))))))))))---.))))).	UCCAAGCAGCACAGCUUGCCAAUC&UUUUGGCAAGCUGU---UCUUGGC	1	26.8255	4	1	Output/S24h/cleaveLand_result/t_plot/PC-3p-13278_910_XM_021142098.1_961_TPlot.pdf	0	0	NA	NA	NA	26.8255	0	Inf	up	2.2264e-07	2.56268e-07	yes	NA	ko03018(RNA degradation)
PC-3p-13278_910	XM_021142486.1	926	946	937	-37	-24.7	0.667568	7.5	1-5,946-942;7-17,940-930;19-21,928-926	6-6,941-941[SIL];18-18,929-929[SIL]	(((.(((((((((((.(((((&))))).))))))))))).)))	GCUUAGAACGGUUUGGCGAGA&UUUUGGCAAGCUGUUCUUGGC	0	0	NA	NA	NA	1	30.281	4	1	Output/S0h/cleaveLand_result/t_plot/PC-3p-13278_910_XM_021142486.1_937_TPlot.pdf	0	30.281	-Inf	down	3.7368e-08	6.97196e-08	yes	GO:0046483(heterocycle metabolic process);GO:0030554(adenyl nucleotide binding);GO:0009987(cellular process);GO:0044424(intracellular part);GO:0048731(system development);GO:0035670(plant-type ovary development);GO:0048437(floral organ development);GO:0043227(membrane-bounded organelle);GO:0048438(floral whorl development);GO:0097367(carbohydrate derivative binding);GO:0022414(reproductive proces…	ko00970(Aminoacyl-tRNA biosynthesis)
PC-3p-13278_910	XM_021142677.1	1346	1365	1356	-37	-25.3	0.683784	12	6-11,1360-1355;13-21,1354-1346	1-5,1365-1361[UP5];12-12,x-x[BULq]	(((((((((-((((((.....&.....)))))).)))))))))	GCCGGGAAC-GCUUGCGUGAG&UUUUGGCAAGCUGUUCUUGGC	0	0	NA	NA	NA	1	30.281	4	0.999997	Output/S0h/cleaveLand_result/t_plot/PC-3p-13278_910_XM_021142677.1_1356_TPlot.pdf	0	30.281	-Inf	down	3.7368e-08	6.97196e-08	yes	GO:0005488(binding);GO:0046872(metal ion binding);GO:0010556(regulation of macromolecule biosynthetic process);GO:1903506(regulation of nucleic acid-templated transcription);GO:0060255(regulation of macromolecule metabolic process);GO:0031323(regulation of cellular metabolic process);GO:0019219(regulation of nucleobase-containing compound metabolic process);GO:0031326(regulation of cellular biosy…	NA
[truncated: 18,846 more rows]
