# Supplementary material for: Integration of Small RNA and Degradome Sequencing Reveals the Regulatory Network of Al-Induced Programmed Cell Death in Peanut
Source: Int J Mol Sci. 2021 Dec 27;23(1):246. doi: 10.3390/ijms23010246 (PMC8745729; doi:10.3390/ijms23010246)
Supplement: Supplementary file 1 [file ijms-23-00246-s001.zip › Table S5-8 The predicted targets of known and novel miRNAs in S24hvsS8h.xlsx]

## Sheet: S8hvsS24h
Table S5-8 The predicted targets of known and novel miRNAs in S24hvsS8h
Item	Description
TStart	Start position of mRNA and miRNA alignment region
TStop	End position of mRNA and miRNA alignment region
TSlice	Degradation site
AllenScore	Penalty score of mismatched bases between the miRNA and its target (the lower the value, the better)
Paired	Paired position (format is miRNA (5 '- 3'), mRNA (3 '- 5'), " ;" for segmentation.)
Unpaired	Unpaired position
Structure	Secondary structure
DegradomeCategory	Category 0:over one raw read at the position, abundance at the position is equal to the maximum on the transcript, and there is only one maximum on the transcript
	Category 1:over one raw read at the position, abundance at the position is equal to the maximum on the transcript, and there is more than one maximum position on the transcript
	Category 2:over one raw read at the position, abundance at position is less than the maximum but higher than the median for the transcript
	Category 3:over one raw read at the position, abundance at the position is equal to or less than the median for the transcript
	Category 4:only one raw read at the position
Query	Transcript	TStart	TStop	TSlice	MFEperfect	MFEsite	MFEratio	AllenScore	Paired	Unpaired	Structure	Sequence	DegradomeRawReads(S24h)	DegradomeNormReads(S24h)	DegradomeCategory(S24h)	DegradomePval(S24h)	Tplot_file_path(S24h)	DegradomeRawReads(S8h)	DegradomeNormReads(S8h)	DegradomeCategory(S8h)	DegradomePval(S8h)	Tplot_file_path(S8h)	S24h	S8h	log2(fold_change)	regulation	pvalue	qvalue	significant	GO	KEGG
PC-3p-100264_81	BGI_novel_T000262	2187	2217	2201	-52.3	-34.3	0.655832	19	1-8,2217-2210;9-9,2202-2202;11-16,2200-2195;19-24,2192-2187	x-x,2209-2203[BULt];10-10,2201-2201[SIL];17-18,2194-2193[SIL]	((((((..((((((.(.......((((((((&))))))))-------).))))))..))))))	GGCUACCAGCCAGGGUGUUGCAAGAGGCCAA&UUGGCCUU-------AGCCUGGCCUGUAGCC	0	0	NA	NA	NA	1	33.3045	4	0.978273	Output/S8h/cleaveLand_result/t_plot/PC-3p-100264_81_BGI_novel_T000262_2201_TPlot.pdf	0	33.3045	-Inf	down	7.8779e-09	1.51467e-08	yes	GO:0016788(hydrolase activity, acting on ester bonds);GO:0008081(phosphoric diester hydrolase activity);GO:0005488(binding);GO:0006793(phosphorus metabolic process);GO:0043169(cation binding);GO:0097164(ammonium ion metabolic process);GO:0009056(catabolic process);GO:0071704(organic substance metabolic process);GO:0042578(phosphoric ester hydrolase activity);GO:0044255(cellular lipid metabolic pr…	ko01100(Metabolic pathways);ko00565(Ether lipid metabolism);ko01110(Biosynthesis of secondary metabolites);ko04144(Endocytosis);ko00564(Glycerophospholipid metabolism)
PC-3p-100264_81	BGI_novel_T007846	2931	2962	2953	-52.3	-35.8	0.684512	10.5	1-14,2962-2949;15-16,2946-2945;17-18,2943-2942;19-24,2936-2931	x-x,2948-2947[BULt];x-x,2944-2944[BULt];x-x,2941-2937[BULt]	((((((.....((.((..((((((((((((((&))))))))))))))--))-))-----))))))	GGCUAUGAAAUGGAGCAUCAGGCUGAGGCCAG&UUGGCCUUAGCCUG--GC-CU-----GUAGCC	1	26.8255	4	0.791273	Output/S24h/cleaveLand_result/t_plot/PC-3p-100264_81_BGI_novel_T007846_2953_TPlot.pdf	0	0	NA	NA	NA	26.8255	0	Inf	up	2.2264e-07	2.57434e-07	yes	GO:0044238(primary metabolic process);GO:0044260(cellular macromolecule metabolic process);GO:0043231(intracellular membrane-bounded organelle);GO:0016311(dephosphorylation);GO:0043226(organelle);GO:0005622(intracellular);GO:0044267(cellular protein metabolic process);GO:0043412(macromolecule modification);GO:0005623(cell);GO:0004721(phosphoprotein phosphatase activity);GO:0003824(catalytic activ…	ko03013(RNA transport);ko03040(Spliceosome);ko03015(mRNA surveillance pathway)
PC-3p-100264_81	BGI_novel_T007847	2913	2944	2935	-52.3	-35.8	0.684512	10.5	1-14,2944-2931;15-16,2928-2927;17-18,2925-2924;19-24,2918-2913	x-x,2930-2929[BULt];x-x,2926-2926[BULt];x-x,2923-2919[BULt]	((((((.....((.((..((((((((((((((&))))))))))))))--))-))-----))))))	GGCUAUGAAAUGGAGCAUCAGGCUGAGGCCAG&UUGGCCUUAGCCUG--GC-CU-----GUAGCC	2	53.6509	2	0.409529	Output/S24h/cleaveLand_result/t_plot/PC-3p-100264_81_BGI_novel_T007847_2935_TPlot.pdf	2	66.6089	2	0.353258	Output/S8h/cleaveLand_result/t_plot/PC-3p-100264_81_BGI_novel_T007847_2935_TPlot.pdf	53.6509	66.6089	-0.312112	down	0.23734	0.250512	yes	GO:0044238(primary metabolic process);GO:0044260(cellular macromolecule metabolic process);GO:0043231(intracellular membrane-bounded organelle);GO:0016311(dephosphorylation);GO:0043226(organelle);GO:0005622(intracellular);GO:0044267(cellular protein metabolic process);GO:0043412(macromolecule modification);GO:0005623(cell);GO:0004721(phosphoprotein phosphatase activity);GO:0003824(catalytic activ…	ko03013(RNA transport);ko03040(Spliceosome);ko03015(mRNA surveillance pathway)
PC-3p-100264_81	BGI_novel_T007848	2913	2944	2935	-52.3	-35.8	0.684512	10.5	1-14,2944-2931;15-16,2928-2927;17-18,2925-2924;19-24,2918-2913	x-x,2930-2929[BULt];x-x,2926-2926[BULt];x-x,2923-2919[BULt]	((((((.....((.((..((((((((((((((&))))))))))))))--))-))-----))))))	GGCUAUGAAAUGGAGCAUCAGGCUGAGGCCAG&UUGGCCUUAGCCUG--GC-CU-----GUAGCC	1	26.8255	4	0.785931	Output/S24h/cleaveLand_result/t_plot/PC-3p-100264_81_BGI_novel_T007848_2935_TPlot.pdf	0	0	NA	NA	NA	26.8255	0	Inf	up	2.2264e-07	2.57434e-07	yes	GO:0044238(primary metabolic process);GO:0044260(cellular macromolecule metabolic process);GO:0043231(intracellular membrane-bounded organelle);GO:0016311(dephosphorylation);GO:0043226(organelle);GO:0005622(intracellular);GO:0044267(cellular protein metabolic process);GO:0043412(macromolecule modification);GO:0005623(cell);GO:0004721(phosphoprotein phosphatase activity);GO:0003824(catalytic activ…	ko03013(RNA transport);ko03040(Spliceosome);ko03015(mRNA surveillance pathway)
PC-3p-100264_81	XM_016078049.2	565	593	584	-52.3	-36.5	0.697897	11.5	1-2,593-592;4-17,590-577;18-20,571-569;22-24,567-565	3-3,591-591[SIL];x-x,576-572[BULt];21-21,568-568[SIL]	(((.(((.....((((((((((((((.((&)).))))))))))))))-----))).)))	GGUAACAGGAUCGGCCAGGCUGGGGCGGA&UUGGCCUUAGCCUGGCC-----UGUAGCC	0	0	NA	NA	NA	1	33.3045	4	0.607817	Output/S8h/cleaveLand_result/t_plot/PC-3p-100264_81_XM_016078049.2_584_TPlot.pdf	0	33.3045	-Inf	down	7.8779e-09	1.51467e-08	yes	NA	ko01100(Metabolic pathways);ko00790(Folate biosynthesis)
PC-3p-100264_81	XM_016079178.2	576	601	592	-52.3	-38.5	0.736138	8.5	2-2,600-600;4-13,598-589;14-20,587-581;22-24,578-576	1-1,601-601[UP5];3-3,599-599[SIL];x-x,588-588[BULt];21-21,580-579[AILt]	(((..(((((((.((((((((((.(.&.).))))))))))-)))))))-.)))	GGCGGGCGGGCCUGGGCUAGGGCGAC&UUGGCCUUAGCCU-GGCCUGU-AGCC	1	26.8255	4	0.261576	Output/S24h/cleaveLand_result/t_plot/PC-3p-100264_81_XM_016079178.2_592_TPlot.pdf	0	0	NA	NA	NA	26.8255	0	Inf	up	2.2264e-07	2.57434e-07	yes	GO:0016021(integral component of membrane);GO:0016020(membrane);GO:0044425(membrane part);GO:0031224(intrinsic component of membrane)	NA
PC-3p-100264_81	XM_016080711.2	375	402	392	-52.3	-35.7	0.6826	12	3-5,400-398;6-12,396-390;13-18,388-383;19-23,380-376	1-2,402-401[UP5];x-x,397-397[BULt];x-x,389-389[BULt];x-x,382-381[BULt];24-24,375-375[UP3]	.(((((..((((((.(((((((.(((..&..)))-)))))))-))))))--))))).	AGCUGCUGGGGCCAGGGCUGAGAGCCUC&UUGGC-CUUAGCC-UGGCCU--GUAGCC	1	26.8255	4	0.867554	Output/S24h/cleaveLand_result/t_plot/PC-3p-100264_81_XM_016080711.2_392_TPlot.pdf	0	0	NA	NA	NA	26.8255	0	Inf	up	2.2264e-07	2.57434e-07	yes	NA	NA
PC-3p-100264_81	XM_016082554.2	1544	1567	1558	-52.3	-34.7	0.66348	9	2-8,1566-1560;10-13,1558-1555;16-20,1552-1548;22-24,1546-1544	1-1,1567-1567[UP5];9-9,1559-1559[SIL];14-15,1554-1553[SIL];21-21,1547-1547[SIL]	(((.(((((..((((.(((((((.&.))))))).))))..))))).)))	GGCCGCGGGAAAGGCCGGGGCCAU&UUGGCCUUAGCCUGGCCUGUAGCC	3	80.4764	2	0.727339	Output/S24h/cleaveLand_result/t_plot/PC-3p-100264_81_XM_016082554.2_1558_TPlot.pdf	0	0	NA	NA	NA	80.4764	0	Inf	up	2.9371e-19	3.48128e-18	yes	GO:0005215(transporter activity);GO:0022857(transmembrane transporter activity);GO:0015291(secondary active transmembrane transporter activity);GO:0006811(ion transport);GO:0006817(phosphate ion transport);GO:0051234(establishment of localization);GO:0031224(intrinsic component of membrane);GO:0055085(transmembrane transport);GO:0016020(membrane);GO:0015698(inorganic anion transport);GO:0022804(a…	NA
PC-3p-100264_81	XM_016083974.2	1332	1355	1346	-52.3	-34.3	0.655832	11	4-6,1352-1350;8-20,1348-1336;22-23,1334-1333	1-3,1355-1353[UP5];7-7,1349-1349[SIL];21-21,1335-1335[SIL];24-24,1332-1332[UP3]	.((.(((((((((((((.(((...&...))).))))))))))))).)).	CGCGGCAGGUCAGGCUGCGGCAUA&UUGGCCUUAGCCUGGCCUGUAGCC	1	26.8255	4	0.99019	Output/S24h/cleaveLand_result/t_plot/PC-3p-100264_81_XM_016083974.2_1346_TPlot.pdf	0	0	NA	NA	NA	26.8255	0	Inf	up	2.2264e-07	2.57434e-07	yes	GO:0006810(transport);GO:0044425(membrane part);GO:0032559(adenyl ribonucleotide binding);GO:0022857(transmembrane transporter activity);GO:0017076(purine nucleotide binding);GO:0097367(carbohydrate derivative binding);GO:1901363(heterocyclic compound binding);GO:0042626(ATPase activity, coupled to transmembrane movement of substances);GO:0032553(ribonucleotide binding);GO:0000166(nucleotide bind…	ko02010(ABC transporters)
PC-3p-100264_81	XM_016087415.2	1036	1058	1050	-52.3	-34.3	0.655832	9.5	2-8,1057-1051;11-12,1049-1048;14-23,1046-1037	1-1,1058-1058[UP5];9-10,1050-1050[AILq];13-13,1047-1047[SIL];24-24,1036-1036[UP3]	.((((((((((.((.-(((((((.&.)))))))..)).)))))))))).	AGCUGCGGGCUUGGG-GAGGCCAU&UUGGCCUUAGCCUGGCCUGUAGCC	5	134.127	2	0.804694	Output/S24h/cleaveLand_result/t_plot/PC-3p-100264_81_XM_016087415.2_1050_TPlot.pdf	0	0	NA	NA	NA	134.127	0	Inf	up	5.1009e-31	2.38712e-29	yes	NA	ko00750(Vitamin B6 metabolism)
PC-3p-100264_81	XM_016095616.2	565	589	580	-52.3	-36.1	0.690249	9.5	1-8,589-582;11-18,579-572;20-23,569-566	9-10,581-580[SIL];19-19,571-570[AILt];24-24,565-565[UP3]	.((((..((((((((..((((((((&))))))))..))))))))-.)))).	AGCUAAAGGGCCAGGAGGAGGCCGA&UUGGCCUUAGCCUGGCCU-GUAGCC	0	0	NA	NA	NA	1	33.3045	4	0.662078	Output/S8h/cleaveLand_result/t_plot/PC-3p-100264_81_XM_016095616.2_580_TPlot.pdf	0	33.3045	-Inf	down	7.8779e-09	1.51467e-08	yes	GO:0071704(organic substance metabolic process);GO:0090304(nucleic acid metabolic process);GO:0006396(RNA processing);GO:0008152(metabolic process);GO:0044237(cellular metabolic process);GO:0043170(macromolecule metabolic process);GO:0044260(cellular macromolecule metabolic process);GO:0034641(cellular nitrogen compound metabolic process);GO:0006725(cellular aromatic compound metabolic process);G…	ko03040(Spliceosome);ko03018(RNA degradation)
PC-3p-100264_81	XM_016100348.2	746	775	761	-52.3	-35.8	0.684512	15.5	2-7,774-769;8-9,763-762;11-14,760-757;15-24,755-746	1-1,775-775[UP5];x-x,768-764[BULt];10-10,761-761[SIL];x-x,756-756[BULt]	((((((((((.((((.((.....((((((.&.))))))-----)).))))-))))))))))	GGCUGCGGGUACAGGGUACUGGAAGGCCAC&UUGGCCU-----UAGCCUG-GCCUGUAGCC	3	80.4764	3	0.137681	Output/S24h/cleaveLand_result/t_plot/PC-3p-100264_81_XM_016100348.2_761_TPlot.pdf	1	33.3045	4	0.714961	Output/S8h/cleaveLand_result/t_plot/PC-3p-100264_81_XM_016100348.2_761_TPlot.pdf	80.4764	33.3045	1.27285	up	9.7594e-06	1.11208e-05	yes	GO:0071704(organic substance metabolic process);GO:0044271(cellular nitrogen compound biosynthetic process);GO:1901360(organic cyclic compound metabolic process);GO:0044260(cellular macromolecule metabolic process);GO:0034654(nucleobase-containing compound biosynthetic process);GO:0008152(metabolic process);GO:0034641(cellular nitrogen compound metabolic process);GO:0009059(macromolecule biosynth…	ko03015(mRNA surveillance pathway);ko03018(RNA degradation);ko04120(Ubiquitin mediated proteolysis);ko00561(Glycerolipid metabolism);ko03013(RNA transport);ko01100(Metabolic pathways);ko04141(Protein processing in endoplasmic reticulum)
PC-3p-100264_81	XM_016102022.2	1217	1240	1231	-52.3	-34	0.650096	7.5	2-9,1239-1232;11-20,1230-1221;22-23,1219-1218	1-1,1240-1240[UP5];10-10,1231-1231[SIL];21-21,1220-1220[SIL];24-24,1217-1217[UP3]	.((.((((((((((.((((((((.&.)))))))).)))))))))).)).	UGUAGCAGGUCAGGAUAGGGCCAU&UUGGCCUUAGCCUGGCCUGUAGCC	1	26.8255	4	0.99643	Output/S24h/cleaveLand_result/t_plot/PC-3p-100264_81_XM_016102022.2_1231_TPlot.pdf	0	0	NA	NA	NA	26.8255	0	Inf	up	2.2264e-07	2.57434e-07	yes	NA	ko00511(Other glycan degradation)
PC-3p-100264_81	XM_016102694.2	2127	2150	2142	-52.3	-34	0.650096	9.5	3-7,2148-2144;9-13,2143-2139;15-23,2136-2128	1-2,2150-2149[UP5];8-8,x-x[BULq];14-14,2138-2137[AILt];24-24,2127-2127[UP3]	.(((((((((..(((((-(((((..&..))))).)))))-.))))))))).	UGCUACAGGCAUGGGCU-AGGCUUU&UUGGCCUUAGCCU-GGCCUGUAGCC	0	0	NA	NA	NA	5	166.522	2	0.799156	Output/S8h/cleaveLand_result/t_plot/PC-3p-100264_81_XM_016102694.2_2142_TPlot.pdf	0	166.522	-Inf	down	4.2241e-38	2.98357e-36	yes	GO:0033365(protein localization to organelle);GO:0051179(localization);GO:0051169(nuclear transport);GO:0046907(intracellular transport);GO:0043229(intracellular organelle);GO:0070013(intracellular organelle lumen);GO:0031090(organelle membrane);GO:0042277(peptide binding);GO:0008565(protein transporter activity);GO:0006913(nucleocytoplasmic transport);GO:0031267(small GTPase binding);GO:0005635(…	NA
PC-3p-100264_81	XM_016103586.2	1592	1615	1607	-52.3	-34.38	0.657361	7.5	1-8,1615-1608;10-15,1607-1602;16-17,1600-1599;21-24,1595-1592	9-9,x-x[BULq];x-x,1601-1601[BULt];18-20,1598-1596[SIL]	((((...((.((((((-((((((((&)))))))).))))))-))...))))	GGCUUGUGGUCCGGGC-AGGGCCAA&UUGGCCUUAGCCUGG-CCUGUAGCC	0	0	NA	NA	NA	3	99.9134	2	0.706983	Output/S8h/cleaveLand_result/t_plot/PC-3p-100264_81_XM_016103586.2_1607_TPlot.pdf	0	99.9134	-Inf	down	1.5881e-23	2.78872e-22	yes	GO:0003824(catalytic activity);GO:0005886(plasma membrane);GO:0005623(cell);GO:0001871(pattern binding);GO:0044464(cell part);GO:0016021(integral component of membrane);GO:0030246(carbohydrate binding);GO:0016798(hydrolase activity, acting on glycosyl bonds);GO:0044425(membrane part);GO:0044459(plasma membrane part);GO:0030247(polysaccharide binding);GO:0071704(organic substance metabolic process…	ko00500(Starch and sucrose metabolism)
PC-3p-100264_81	XM_016108967.2	207	231	222	-52.3	-37.3	0.713193	7	1-8,231-224;10-12,222-220;14-16,218-216;17-23,214-208	9-9,223-223[SIL];13-13,219-219[SIL];x-x,215-215[BULt];24-24,207-207[UP3]	.(((((((.(((.(((.((((((((&)))))))).))).)))-))))))).	AGCUGCGGUGCCCGGCGGAGGCCAA&UUGGCCUUAGCCUGGC-CUGUAGCC	2	53.6509	3	0.05611	Output/S24h/cleaveLand_result/t_plot/PC-3p-100264_81_XM_016108967.2_222_TPlot.pdf	0	0	NA	NA	NA	53.6509	0	Inf	up	2.3929e-13	1.027e-12	yes	NA	NA
PC-3p-100264_81	XM_016113267.2	2913	2944	2935	-52.3	-35.8	0.684512	10.5	1-14,2944-2931;15-16,2928-2927;17-18,2925-2924;19-24,2918-2913	x-x,2930-2929[BULt];x-x,2926-2926[BULt];x-x,2923-2919[BULt]	((((((.....((.((..((((((((((((((&))))))))))))))--))-))-----))))))	GGCUAUGAAAUGGAGCAUCAGGCUGAGGCCAG&UUGGCCUUAGCCUG--GC-CU-----GUAGCC	0	0	NA	NA	NA	1	33.3045	4	0.774432	Output/S8h/cleaveLand_result/t_plot/PC-3p-100264_81_XM_016113267.2_2935_TPlot.pdf	0	33.3045	-Inf	down	7.8779e-09	1.51467e-08	yes	GO:0044238(primary metabolic process);GO:0044260(cellular macromolecule metabolic process);GO:0043231(intracellular membrane-bounded organelle);GO:0016311(dephosphorylation);GO:0043226(organelle);GO:0005622(intracellular);GO:0044267(cellular protein metabolic process);GO:0043412(macromolecule modification);GO:0005623(cell);GO:0004721(phosphoprotein phosphatase activity);GO:0003824(catalytic activ…	ko03013(RNA transport);ko03040(Spliceosome);ko03015(mRNA surveillance pathway)
PC-3p-100264_81	XM_016114588.2	476	499	490	-52.3	-34.6	0.661568	8.5	1-11,499-489;12-13,487-486;15-18,484-481;22-24,478-476	x-x,488-488[BULt];14-14,485-485[SIL];19-21,480-479[AILq]	(((..-((((.((.(((((((((((&)))))))))))-)).))))...)))	GGCGA-GGGCGGGCGUUAAGGCCAG&UUGGCCUUAGC-CUGGCCUGUAGCC	3	80.4764	3	0.312086	Output/S24h/cleaveLand_result/t_plot/PC-3p-100264_81_XM_016114588.2_490_TPlot.pdf	0	0	NA	NA	NA	80.4764	0	Inf	up	2.9371e-19	3.48128e-18	yes	GO:0046395(carboxylic acid catabolic process);GO:0045548(phenylalanine ammonia-lyase activity);GO:0003824(catalytic activity);GO:0044424(intracellular part);GO:0016840(carbon-nitrogen lyase activity);GO:0009698(phenylpropanoid metabolic process);GO:0006807(nitrogen compound metabolic process);GO:0008152(metabolic process);GO:1901564(organonitrogen compound metabolic process);GO:0009063(cellular a…	ko01100(Metabolic pathways);ko00360(Phenylalanine metabolism);ko00940(Phenylpropanoid biosynthesis);ko01110(Biosynthesis of secondary metabolites)
PC-3p-100264_81	XM_016117981.2	481	505	495	-52.3	-34	0.650096	9	3-6,503-500;7-13,498-492;14-19,490-485;21-24,484-481	1-2,505-504[UP5];x-x,499-499[BULt];x-x,491-491[BULt];20-20,x-x[BULq]	((((-((((((.(((((((.((((..&..))))-)))))))-)))))).))))	GGUU-CGGGCCGAGGCUAACGGCUCC&UUGGCC-UUAGCCU-GGCCUGUAGCC	1	26.8255	4	0.996854	Output/S24h/cleaveLand_result/t_plot/PC-3p-100264_81_XM_016117981.2_495_TPlot.pdf	0	0	NA	NA	NA	26.8255	0	Inf	up	2.2264e-07	2.57434e-07	yes	GO:0005488(binding);GO:0097159(organic cyclic compound binding);GO:1901363(heterocyclic compound binding)	ko03040(Spliceosome)
PC-3p-100264_81	XM_016117982.2	482	506	496	-52.3	-34	0.650096	9	3-6,504-501;7-13,499-493;14-19,491-486;21-24,485-482	1-2,506-505[UP5];x-x,500-500[BULt];x-x,492-492[BULt];20-20,x-x[BULq]	((((-((((((.(((((((.((((..&..))))-)))))))-)))))).))))	GGUU-CGGGCCGAGGCUAACGGCUCC&UUGGCC-UUAGCCU-GGCCUGUAGCC	1	26.8255	4	0.996606	Output/S24h/cleaveLand_result/t_plot/PC-3p-100264_81_XM_016117982.2_496_TPlot.pdf	0	0	NA	NA	NA	26.8255	0	Inf	up	2.2264e-07	2.57434e-07	yes	GO:0005488(binding);GO:0097159(organic cyclic compound binding);GO:1901363(heterocyclic compound binding)	ko03040(Spliceosome)
PC-3p-100264_81	XM_021138127.1	554	577	568	-52.3	-34.3	0.655832	5.5	1-12,577-566;14-16,565-563;17-18,561-560;20-20,558-558;22-24,556-554	13-13,x-x[BULq];x-x,562-562[BULt];19-19,559-559[SIL];21-21,557-557[SIL]	(((.(.((.(((-((((((((((((&)))))))))))).)))-)).).)))	GGCAAGAGAGCU-GGCUGAGGCCAA&UUGGCCUUAGCCUGGC-CUGUAGCC	1	26.8255	4	0.987047	Output/S24h/cleaveLand_result/t_plot/PC-3p-100264_81_XM_021138127.1_568_TPlot.pdf	0	0	NA	NA	NA	26.8255	0	Inf	up	2.2264e-07	2.57434e-07	yes	GO:0016021(integral component of membrane);GO:0031224(intrinsic component of membrane);GO:0044425(membrane part);GO:0016020(membrane)	NA
PC-3p-101862_79	XM_016080550.2	983	1006	997	-45.4	-29.6	0.651982	7.5	2-13,1005-994;15-16,992-991;18-22,989-985	1-1,1006-1006[UP5];14-14,993-993[SIL];17-17,990-990[SIL];23-24,984-983[UP3]	..(((((.((.((((((((((((.&.)))))))))))).)).)))))..	UCGUGGAAUCCGGUGCAGUUGGCG&AGUCGACUGCACCUGAAUUCACCU	1	26.8255	4	0.883275	Output/S24h/cleaveLand_result/t_plot/PC-3p-101862_79_XM_016080550.2_997_TPlot.pdf	0	0	NA	NA	NA	26.8255	0	Inf	up	2.2264e-07	2.57434e-07	yes	NA	ko04120(Ubiquitin mediated proteolysis)
PC-3p-101862_79	XM_016096771.2	852	878	866	-45.4	-31.5	0.693833	14	1-4,878-875;7-8,872-871;9-23,867-853	5-6,874-873[SIL];x-x,870-868[BULt];24-24,852-852[UP3]	.(((((((((((((((...((..((((&))))..))---))))))))))))))).	CGGUGGAUUCGGGUGCUGCGGAGGGCU&AGUCGACU---GCACCUGAAUUCACCU	0	0	NA	NA	NA	1	33.3045	4	0.599385	Output/S8h/cleaveLand_result/t_plot/PC-3p-101862_79_XM_016096771.2_866_TPlot.pdf	0	33.3045	-Inf	down	7.8779e-09	1.51467e-08	yes	GO:0044260(cellular macromolecule metabolic process);GO:0006470(protein dephosphorylation);GO:1901564(organonitrogen compound metabolic process);GO:0006807(nitrogen compound metabolic process);GO:0008152(metabolic process);GO:0006796(phosphate-containing compound metabolic process);GO:0016787(hydrolase activity);GO:0009987(cellular process);GO:0044237(cellular metabolic process);GO:0044238(primar…	NA
PC-3p-105086_75	XM_016102202.2	290	314	305	-41.8	-29.3	0.700957	5.5	2-7,313-308;9-15,306-300;16-24,298-290	1-1,314-314[UP5];8-8,307-307[SIL];x-x,299-299[BULt]	(((((((((.(((((((.((((((.&.)))))).)))))))-)))))))))	AAUUUGGGUGGUGGUCGCCUUCACC&CGUGAAGUCGACUAC-ACCUAAGUU	0	0	NA	NA	NA	1	33.3045	4	0.482877	Output/S8h/cleaveLand_result/t_plot/PC-3p-105086_75_XM_016102202.2_305_TPlot.pdf	0	33.3045	-Inf	down	7.8779e-09	1.51467e-08	yes	GO:0045735(nutrient reservoir activity)	NA
PC-3p-1060_9765	BGI_novel_T002090	361	378	372	-37	-25.22	0.681622	11	1-2,378-377;8-21,374-361	3-7,376-375[AILq]	((((((((((((((..---((&)).....))))))))))))))	UGGCUGUUCUUCUGUU---GG&CCUAUUUCGGAAGAACAGCCA	3	80.4764	2	0.444729	Output/S24h/cleaveLand_result/t_plot/PC-3p-1060_9765_BGI_novel_T002090_372_TPlot.pdf	0	0	NA	NA	NA	80.4764	0	Inf	up	2.9371e-19	3.48128e-18	yes	GO:0017171(serine hydrolase activity);GO:0019538(protein metabolic process);GO:0070011(peptidase activity, acting on L-amino acid peptides);GO:0044260(cellular macromolecule metabolic process);GO:0008152(metabolic process);GO:0008236(serine-type peptidase activity);GO:1901565(organonitrogen compound catabolic process);GO:0004185(serine-type carboxypeptidase activity);GO:0044238(primary metabolic …	NA
PC-3p-1060_9765	BGI_novel_T007984	1056	1078	1069	-37	-25.1	0.678378	8	1-7,1078-1072;9-17,1070-1062;18-20,1059-1057	8-8,1071-1071[SIL];x-x,1061-1060[BULt];21-21,1056-1056[UP3]	.(((..(((((((((.(((((((&))))))).)))))))))--))).	CGGCCGUGUUCUUCUCGAAUGGG&CCUAUUUCGGAAGAACA--GCCA	1	26.8255	4	0.867554	Output/S24h/cleaveLand_result/t_plot/PC-3p-1060_9765_BGI_novel_T007984_1069_TPlot.pdf	0	0	NA	NA	NA	26.8255	0	Inf	up	2.2264e-07	2.57434e-07	yes	GO:0016021(integral component of membrane);GO:0031224(intrinsic component of membrane);GO:0003824(catalytic activity);GO:0016757(transferase activity, transferring glycosyl groups);GO:0044425(membrane part);GO:0016020(membrane);GO:0016740(transferase activity)	ko00514(Other types of O-glycan biosynthesis)
PC-3p-1060_9765	BGI_novel_T009852	672	692	683	-37	-24.9	0.672973	6.5	1-7,692-686;9-14,684-679;16-21,677-672	8-8,685-685[SIL];15-15,678-678[SIL]	((((((.((((((.(((((((&))))))).)))))).))))))	UGGUUGAUCUUCCAAGGUGGG&CCUAUUUCGGAAGAACAGCCA	1	26.8255	4	0.927781	Output/S24h/cleaveLand_result/t_plot/PC-3p-1060_9765_BGI_novel_T009852_683_TPlot.pdf	0	0	NA	NA	NA	26.8255	0	Inf	up	2.2264e-07	2.57434e-07	yes	GO:0005524(ATP binding);GO:0032559(adenyl ribonucleotide binding);GO:0004672(protein kinase activity);GO:0031224(intrinsic component of membrane);GO:0016020(membrane);GO:0032555(purine ribonucleotide binding);GO:0016301(kinase activity);GO:0000166(nucleotide binding);GO:0016773(phosphotransferase activity, alcohol group as acceptor);GO:0043167(ion binding);GO:0036094(small molecule binding);GO:00…	NA
PC-3p-1060_9765	XM_016082100.2	414	442	425	-37	-26.1	0.705405	18.5	1-6,442-437;7-8,429-428;9-21,426-414	x-x,436-430[BULt];x-x,427-427[BULt]	(((((((((((((.((.......((((((&))))))-------))-)))))))))))))	UGGCUGUUUUUCCUGAAUCACUGGAUGGG&CCUAUU-------UC-GGAAGAACAGCCA	2	53.6509	3	0.05611	Output/S24h/cleaveLand_result/t_plot/PC-3p-1060_9765_XM_016082100.2_425_TPlot.pdf	0	0	NA	NA	NA	53.6509	0	Inf	up	2.3929e-13	1.027e-12	yes	NA	NA
PC-3p-1060_9765	XM_016086108.2	1274	1294	1284	-37	-24.32	0.657297	11	1-3,1294-1292;7-16,1287-1278;18-20,1277-1275	4-6,1291-1288[AILt];17-17,x-x[BULq];21-21,1274-1274[UP3]	.(((-((((((((((....(((&)))-...)))))))))).))).	CGGC-GUUCUUCCGGCGAGAGG&CCU-AUUUCGGAAGAACAGCCA	1	26.8255	4	0.987992	Output/S24h/cleaveLand_result/t_plot/PC-3p-1060_9765_XM_016086108.2_1284_TPlot.pdf	0	0	NA	NA	NA	26.8255	0	Inf	up	2.2264e-07	2.57434e-07	yes	NA	ko01100(Metabolic pathways);ko00970(Aminoacyl-tRNA biosynthesis);ko03015(mRNA surveillance pathway)
PC-3p-1060_9765	XM_016096293.2	943	968	954	-37	-24.6	0.664865	13	2-7,967-962;8-17,956-947;19-21,945-943	1-1,968-968[UP5];x-x,961-957[BULt];18-18,946-946[SIL]	(((.((((((((((.....((((((.&.))))))-----)))))))))).)))	UGGGUGUUCUUCCGCGGCAAAAUGGA&CCUAUUU-----CGGAAGAACAGCCA	1	26.8255	4	0.981549	Output/S24h/cleaveLand_result/t_plot/PC-3p-1060_9765_XM_016096293.2_954_TPlot.pdf	0	0	NA	NA	NA	26.8255	0	Inf	up	2.2264e-07	2.57434e-07	yes	GO:0031224(intrinsic component of membrane);GO:0016021(integral component of membrane);GO:0044425(membrane part);GO:0016020(membrane)	NA
PC-3p-1060_9765	XM_016101782.2	488	511	501	-37	-25.78	0.696757	7	1-9,511-503;10-13,501-498;16-21,493-488	x-x,502-502[BULt];14-15,497-494[AILt]	((((((....((((.(((((((((&)))))))))-))))--..))))))	UGGCUGGCGGCUUCUUGAAAUAGG&CCUAUUUCG-GAAG--AACAGCCA	5	134.127	3	0.0955491	Output/S24h/cleaveLand_result/t_plot/PC-3p-1060_9765_XM_016101782.2_501_TPlot.pdf	0	0	NA	NA	NA	134.127	0	Inf	up	5.1009e-31	2.38712e-29	yes	NA	NA
PC-3p-1060_9765	XM_016102850.2	1199	1221	1212	-37	-24.9	0.672973	5.5	2-17,1220-1205;18-20,1202-1200	1-1,1221-1221[UP5];x-x,1204-1203[BULt];21-21,1199-1199[UP3]	.(((..((((((((((((((((.&.))))))))))))))))--))).	AGGCCCUGUUUUUCUGAAAUAGA&CCUAUUUCGGAAGAACA--GCCA	4	107.302	2	0.622673	Output/S24h/cleaveLand_result/t_plot/PC-3p-1060_9765_XM_016102850.2_1212_TPlot.pdf	1	33.3045	4	0.905706	Output/S8h/cleaveLand_result/t_plot/PC-3p-1060_9765_XM_016102850.2_1212_TPlot.pdf	107.302	33.3045	1.68789	up	4.3577e-10	1.74528e-09	yes	GO:0006807(nitrogen compound metabolic process);GO:0030554(adenyl nucleotide binding);GO:0008152(metabolic process);GO:0016773(phosphotransferase activity, alcohol group as acceptor);GO:0043167(ion binding);GO:0071704(organic substance metabolic process);GO:0032559(adenyl ribonucleotide binding);GO:1901564(organonitrogen compound metabolic process);GO:0044260(cellular macromolecule metabolic proc…	ko03008(Ribosome biogenesis in eukaryotes)
PC-3p-1060_9765	XM_016104164.2	627	648	638	-37	-24.2	0.654054	7	3-8,646-641;9-19,639-629	1-2,648-647[UP5];x-x,640-640[BULt];20-21,628-627[UP3]	..(((((((((((.((((((..&..))))))-)))))))))))..	UCGCUGUUCUUCCAGAAAUACU&CCUAUUUC-GGAAGAACAGCCA	1	26.8255	4	0.995845	Output/S24h/cleaveLand_result/t_plot/PC-3p-1060_9765_XM_016104164.2_638_TPlot.pdf	0	0	NA	NA	NA	26.8255	0	Inf	up	2.2264e-07	2.57434e-07	yes	NA	NA
PC-3p-1060_9765	XM_016109235.2	728	749	740	-37	-24.76	0.669189	11	1-2,749-748;7-11,743-739;12-21,737-728	3-6,747-744[SIL];x-x,738-738[BULt]	((((((((((.(((((....((&))....)))))-))))))))))	UGGCUGUUCUCUCCGGUUUCGG&CCUAUUUCGGA-AGAACAGCCA	2	53.6509	2	0.677836	Output/S24h/cleaveLand_result/t_plot/PC-3p-1060_9765_XM_016109235.2_740_TPlot.pdf	0	0	NA	NA	NA	53.6509	0	Inf	up	2.3929e-13	1.027e-12	yes	GO:0031224(intrinsic component of membrane);GO:0016020(membrane);GO:0044425(membrane part);GO:0016021(integral component of membrane)	NA
PC-3p-1060_9765	XM_016109435.2	238	264	255	-37	-24.44	0.660541	20	1-3,264-262;5-10,260-255;13-21,246-238	4-4,261-261[SIL];11-12,254-247[AILt]	(((((((((........((((((.(((&))).))))))------..)))))))))	UGGCUGUUCAUGUCCCGCCGAAGGGGG&CCUAUUUCGG------AAGAACAGCCA	1	26.8255	4	0.985669	Output/S24h/cleaveLand_result/t_plot/PC-3p-1060_9765_XM_016109435.2_255_TPlot.pdf	0	0	NA	NA	NA	26.8255	0	Inf	up	2.2264e-07	2.57434e-07	yes	NA	NA
PC-3p-1060_9765	XM_016112562.2	114	137	128	-37	-24.24	0.655135	6	2-15,136-123;17-21,118-114	1-1,137-137[UP5];16-16,122-119[AILt]	(((((....((((((((((((((.&.))))))))))))))---.)))))	UGGCUUCACUUCUUCUGAAAUAGA&CCUAUUUCGGAAGAA---CAGCCA	0	0	NA	NA	NA	1	33.3045	4	0.98696	Output/S8h/cleaveLand_result/t_plot/PC-3p-1060_9765_XM_016112562.2_128_TPlot.pdf	0	33.3045	-Inf	down	7.8779e-09	1.51467e-08	yes	GO:0006793(phosphorus metabolic process);GO:0016787(hydrolase activity);GO:0006796(phosphate-containing compound metabolic process);GO:0005488(binding);GO:0005623(cell);GO:0005622(intracellular);GO:0003824(catalytic activity);GO:0009987(cellular process);GO:0016817(hydrolase activity, acting on acid anhydrides);GO:0044237(cellular metabolic process);GO:0044424(intracellular part);GO:0046872(metal…	ko00190(Oxidative phosphorylation)
PC-3p-1060_9765	XM_021132478.1	423	445	434	-37	-24.9	0.672973	10	1-5,445-441;6-9,439-436;11-20,433-424	x-x,440-440[BULt];10-10,435-434[AILt];21-21,423-423[UP3]	.((((((((((..((((.(((((&)))))-))))-.)))))))))).	AGGCUGUUCUUGAUGAAUGUGGG&CCUAU-UUCG-GAAGAACAGCCA	0	0	NA	NA	NA	1	33.3045	4	0.895124	Output/S8h/cleaveLand_result/t_plot/PC-3p-1060_9765_XM_021132478.1_434_TPlot.pdf	0	33.3045	-Inf	down	7.8779e-09	1.51467e-08	yes	NA	NA
PC-3p-1060_9765	XM_021139953.1	460	484	474	-37	-24.3	0.656757	7	1-2,484-483;3-15,481-469;16-16,467-467;17-20,464-461	x-x,482-482[BULt];x-x,468-468[BULt];x-x,466-465[BULt];21-21,460-460[UP3]	.((((..(.(((((((((((((.((&))-)))))))))))))-)--)))).	AGGCUCCGCUUCUUCCGAAAUGUGG&CC-UAUUUCGGAAGAA-C--AGCCA	1	26.8255	4	0.988869	Output/S24h/cleaveLand_result/t_plot/PC-3p-1060_9765_XM_021139953.1_474_TPlot.pdf	0	0	NA	NA	NA	26.8255	0	Inf	up	2.2264e-07	2.57434e-07	yes	NA	ko03050(Proteasome)
PC-3p-1060_9765	XM_021142435.1	239	265	256	-37	-24.44	0.660541	20	1-3,265-263;5-10,261-256;13-21,247-239	4-4,262-262[SIL];11-12,255-248[AILt]	(((((((((........((((((.(((&))).))))))------..)))))))))	UGGCUGUUCAUGUCCCGCCGAAGGGGG&CCUAUUUCGG------AAGAACAGCCA	1	26.8255	4	0.986027	Output/S24h/cleaveLand_result/t_plot/PC-3p-1060_9765_XM_021142435.1_256_TPlot.pdf	0	0	NA	NA	NA	26.8255	0	Inf	up	2.2264e-07	2.57434e-07	yes	NA	NA
PC-3p-107728_73	XM_016082671.2	615	636	629	-47.1	-30.8	0.653928	12.5	4-7,633-630;10-23,629-616	1-3,636-634[UP5];8-9,x-x[BULq];24-24,615-615[UP3]	.((((((((((((((--((((...&...))))..)))))))))))))).	GUCGGGUGCAGCGGC--CGUGGUU&UCACAUGAAGUCGCUGCACCUGAG	2	53.6509	2	0.517506	Output/S24h/cleaveLand_result/t_plot/PC-3p-107728_73_XM_016082671.2_629_TPlot.pdf	0	0	NA	NA	NA	53.6509	0	Inf	up	2.3929e-13	1.027e-12	yes	GO:0016829(lyase activity);GO:0016836(hydro-lyase activity);GO:0008152(metabolic process);GO:0016835(carbon-oxygen lyase activity);GO:0003824(catalytic activity)	ko01110(Biosynthesis of secondary metabolites);ko01210(2-Oxocarboxylic acid metabolism);ko01100(Metabolic pathways);ko01230(Biosynthesis of amino acids);ko00660(C5-Branched dibasic acid metabolism);ko00290(Valine, leucine and isoleucine biosynthesis)
PC-3p-107728_73	XM_016082672.2	616	637	630	-47.1	-30.8	0.653928	12.5	4-7,634-631;10-23,630-617	1-3,637-635[UP5];8-9,x-x[BULq];24-24,616-616[UP3]	.((((((((((((((--((((...&...))))..)))))))))))))).	GUCGGGUGCAGCGGC--CGUGGUU&UCACAUGAAGUCGCUGCACCUGAG	0	0	NA	NA	NA	1	33.3045	4	0.84943	Output/S8h/cleaveLand_result/t_plot/PC-3p-107728_73_XM_016082672.2_630_TPlot.pdf	0	33.3045	-Inf	down	7.8779e-09	1.51467e-08	yes	GO:0016829(lyase activity);GO:0016836(hydro-lyase activity);GO:0008152(metabolic process);GO:0016835(carbon-oxygen lyase activity);GO:0003824(catalytic activity)	ko01110(Biosynthesis of secondary metabolites);ko01210(2-Oxocarboxylic acid metabolism);ko01100(Metabolic pathways);ko01230(Biosynthesis of amino acids);ko00660(C5-Branched dibasic acid metabolism);ko00290(Valine, leucine and isoleucine biosynthesis)
PC-3p-107728_73	XM_021132349.1	622	643	636	-47.1	-30.8	0.653928	12.5	4-7,640-637;10-23,636-623	1-3,643-641[UP5];8-9,x-x[BULq];24-24,622-622[UP3]	.((((((((((((((--((((...&...))))..)))))))))))))).	GUCGGGUGCAGCGGC--CGUGGUU&UCACAUGAAGUCGCUGCACCUGAG	1	26.8255	4	0.891797	Output/S24h/cleaveLand_result/t_plot/PC-3p-107728_73_XM_021132349.1_636_TPlot.pdf	0	0	NA	NA	NA	26.8255	0	Inf	up	2.2264e-07	2.57434e-07	yes	GO:0016829(lyase activity);GO:0016836(hydro-lyase activity);GO:0008152(metabolic process);GO:0016835(carbon-oxygen lyase activity);GO:0003824(catalytic activity)	ko01110(Biosynthesis of secondary metabolites);ko01210(2-Oxocarboxylic acid metabolism);ko01100(Metabolic pathways);ko01230(Biosynthesis of amino acids);ko00660(C5-Branched dibasic acid metabolism);ko00290(Valine, leucine and isoleucine biosynthesis)
PC-3p-108384_72	XM_016082671.2	611	634	626	-45.2	-33.7	0.745575	9	2-9,633-626;11-20,625-616;21-22,614-613	1-1,634-634[UP5];10-10,x-x[BULq];x-x,615-615[BULt];23-24,612-611[UP3]	..((.((((((((((-((((((((.&.)))))))).))))))))))-))..	GCGCGUCGGGUGCAG-CGGCCGUGG&ACAUGGUCGACUGCACCUGA-GUUU	0	0	NA	NA	NA	1	33.3045	4	0.332485	Output/S8h/cleaveLand_result/t_plot/PC-3p-108384_72_XM_016082671.2_626_TPlot.pdf	0	33.3045	-Inf	down	7.8779e-09	1.51467e-08	yes	GO:0016829(lyase activity);GO:0016836(hydro-lyase activity);GO:0008152(metabolic process);GO:0016835(carbon-oxygen lyase activity);GO:0003824(catalytic activity)	ko01110(Biosynthesis of secondary metabolites);ko01210(2-Oxocarboxylic acid metabolism);ko01100(Metabolic pathways);ko01230(Biosynthesis of amino acids);ko00660(C5-Branched dibasic acid metabolism);ko00290(Valine, leucine and isoleucine biosynthesis)
PC-3p-108384_72	XM_016084492.2	616	639	630	-45.2	-31.4	0.69469	12.5	5-21,635-619	1-4,639-636[UP5];22-24,618-616[UP3]	...(((((((((((((((((....&....)))))))))))))))))...	AGUUUCAGGUGCAGUUGGCCCUAG&ACAUGGUCGACUGCACCUGAGUUU	0	0	NA	NA	NA	1	33.3045	4	0.535057	Output/S8h/cleaveLand_result/t_plot/PC-3p-108384_72_XM_016084492.2_630_TPlot.pdf	0	33.3045	-Inf	down	7.8779e-09	1.51467e-08	yes	GO:0009968(negative regulation of signal transduction);GO:0051704(multi-organism process);GO:0008152(metabolic process);GO:0044238(primary metabolic process);GO:0002239(response to oomycetes);GO:0043167(ion binding);GO:0030135(coated vesicle);GO:0023051(regulation of signaling);GO:0005737(cytoplasm);GO:0044464(cell part);GO:0051173(positive regulation of nitrogen compound metabolic process);GO:00…	NA
PC-3p-108384_72	XM_021132348.1	618	641	633	-45.2	-33.7	0.745575	9	2-9,640-633;11-20,632-623;21-22,621-620	1-1,641-641[UP5];10-10,x-x[BULq];x-x,622-622[BULt];23-24,619-618[UP3]	..((.((((((((((-((((((((.&.)))))))).))))))))))-))..	GCGCGUCGGGUGCAG-CGGCCGUGG&ACAUGGUCGACUGCACCUGA-GUUU	1	26.8255	4	0.396733	Output/S24h/cleaveLand_result/t_plot/PC-3p-108384_72_XM_021132348.1_633_TPlot.pdf	0	0	NA	NA	NA	26.8255	0	Inf	up	2.2264e-07	2.57434e-07	yes	GO:0016829(lyase activity);GO:0016836(hydro-lyase activity);GO:0008152(metabolic process);GO:0016835(carbon-oxygen lyase activity);GO:0003824(catalytic activity)	ko01110(Biosynthesis of secondary metabolites);ko01210(2-Oxocarboxylic acid metabolism);ko01100(Metabolic pathways);ko01230(Biosynthesis of amino acids);ko00660(C5-Branched dibasic acid metabolism);ko00290(Valine, leucine and isoleucine biosynthesis)
PC-3p-110122_70	BGI_novel_T001367	1556	1582	1573	-32.1	-24.8	0.772586	13.5	2-10,1581-1573;11-22,1567-1556	1-1,1582-1582[UP5];x-x,1572-1568[BULt]	((((((((((((.....(((((((((.&.)))))))))-----))))))))))))	AGGCAAAGUUGAGGGCUCAAGGAUCCC&AGGAUUCUUG-----UUAACUUUGCUU	1	26.8255	4	0.671057	Output/S24h/cleaveLand_result/t_plot/PC-3p-110122_70_BGI_novel_T001367_1573_TPlot.pdf	0	0	NA	NA	NA	26.8255	0	Inf	up	2.2264e-07	2.57434e-07	yes	NA	ko03015(mRNA surveillance pathway)
PC-3p-110122_70	BGI_novel_T001630	6961	6984	6975	-32.1	-21.2	0.660436	9.5	1-12,6984-6973;13-15,6969-6967;18-22,6965-6961	x-x,6972-6970[BULt];16-17,6966-6966[AILq]	(((((.-(((...((((((((((((&))))))))))))---)))..)))))	AGGCAU-GUUUGGAACAAGGAUCCU&AGGAUUCUUGUU---AACUUUGCUU	1	26.8255	4	1	Output/S24h/cleaveLand_result/t_plot/PC-3p-110122_70_BGI_novel_T001630_6975_TPlot.pdf	0	0	NA	NA	NA	26.8255	0	Inf	up	2.2264e-07	2.57434e-07	yes	NA	ko04626(Plant-pathogen interaction)
PC-3p-110122_70	BGI_novel_T002921	322	348	334	-32.1	-21.1	0.657321	16	1-5,348-344;6-8,342-340;9-20,335-324	x-x,343-343[BULt];x-x,339-336[BULt];21-22,323-322[UP3]	..((((((((((((....(((.(((((&)))))-)))----))))))))))))..	GCGCAAAGUUGGCGAAUGGGAGAUCCU&AGGAU-UCU----UGUUAACUUUGCUU	1	26.8255	4	1	Output/S24h/cleaveLand_result/t_plot/PC-3p-110122_70_BGI_novel_T002921_334_TPlot.pdf	0	0	NA	NA	NA	26.8255	0	Inf	up	2.2264e-07	2.57434e-07	yes	GO:0033554(cellular response to stress);GO:0003756(protein disulfide isomerase activity);GO:0005783(endoplasmic reticulum);GO:0050896(response to stimulus);GO:0005623(cell);GO:0009987(cellular process);GO:0044424(intracellular part);GO:0016853(isomerase activity);GO:0043227(membrane-bounded organelle);GO:0043226(organelle);GO:0003824(catalytic activity);GO:0044444(cytoplasmic part);GO:0016864(int…	ko04070(Phosphatidylinositol signaling system);ko01100(Metabolic pathways);ko00562(Inositol phosphate metabolism)
PC-3p-110122_70	BGI_novel_T003031	1596	1621	1612	-32.1	-21.16	0.65919	13.5	2-12,1620-1610;15-22,1603-1596	1-1,1621-1621[UP5];13-14,1609-1604[AILt]	((((((((......(((((((((((.&.)))))))))))----..))))))))	AAGCAGAGAGGGUGAGCAAGAAUUCA&AGGAUUCUUGUU----AACUUUGCUU	0	0	NA	NA	NA	1	33.3045	4	1	Output/S8h/cleaveLand_result/t_plot/PC-3p-110122_70_BGI_novel_T003031_1612_TPlot.pdf	0	33.3045	-Inf	down	7.8779e-09	1.51467e-08	yes	NA	ko03013(RNA transport)
PC-3p-110122_70	BGI_novel_T005841	618	640	630	-32.1	-22.3	0.694704	9.5	2-2,639-639;5-22,635-618	1-1,640-640[UP5];3-4,638-636[AILt]	((((((((((((((((((...(.&.)-..))))))))))))))))))	GAGUGAAGUUGACAAGAAGCACA&AG-GAUUCUUGUUAACUUUGCUU	0	0	NA	NA	NA	1	33.3045	4	0.999876	Output/S8h/cleaveLand_result/t_plot/PC-3p-110122_70_BGI_novel_T005841_630_TPlot.pdf	0	33.3045	-Inf	down	7.8779e-09	1.51467e-08	yes	GO:0043933(macromolecular complex subunit organization);GO:0044464(cell part);GO:0006461(protein complex assembly);GO:0022607(cellular component assembly);GO:0009987(cellular process);GO:0005829(cytosol);GO:0071840(cellular component organization or biogenesis);GO:0044424(intracellular part);GO:0005622(intracellular);GO:0044085(cellular component biogenesis);GO:0034622(cellular macromolecular com…	NA
PC-3p-110122_70	BGI_novel_T006249	1130	1151	1142	-32.1	-22.1	0.688474	5	1-2,1151-1150;4-12,1148-1140;14-22,1138-1130	3-3,1149-1149[SIL];13-13,1139-1139[SIL]	(((((((((.(((((((((.((&)).))))))))).)))))))))	AAGUGAAGUGAACAAGAGUGCU&AGGAUUCUUGUUAACUUUGCUU	1	26.8255	4	0.999991	Output/S24h/cleaveLand_result/t_plot/PC-3p-110122_70_BGI_novel_T006249_1142_TPlot.pdf	0	0	NA	NA	NA	26.8255	0	Inf	up	2.2264e-07	2.57434e-07	yes	GO:0044424(intracellular part);GO:0000003(reproduction);GO:0035825(homologous recombination);GO:0006139(nucleobase-containing compound metabolic process);GO:0071704(organic substance metabolic process);GO:0051304(chromosome separation);GO:0033554(cellular response to stress);GO:0050896(response to stimulus);GO:0044464(cell part);GO:0097159(organic cyclic compound binding);GO:0006996(organelle org…	ko03420(Nucleotide excision repair)
PC-3p-110122_70	BGI_novel_T006292	2092	2114	2105	-32.1	-21.4	0.666667	7.5	2-9,2113-2106;11-18,2104-2097;19-20,2095-2094	1-1,2114-2114[UP5];10-10,2105-2105[SIL];x-x,2096-2096[BULt];21-22,2093-2092[UP3]	..((.((((((((.((((((((.&.)))))))).))))))))-))..	AUGUGAAAGUUGAGAAGAAUCCA&AGGAUUCUUGUUAACUUU-GCUU	1	26.8255	4	1	Output/S24h/cleaveLand_result/t_plot/PC-3p-110122_70_BGI_novel_T006292_2105_TPlot.pdf	0	0	NA	NA	NA	26.8255	0	Inf	up	2.2264e-07	2.57434e-07	yes	GO:0043226(organelle);GO:0044464(cell part);GO:0016853(isomerase activity);GO:0044260(cellular macromolecule metabolic process);GO:0008152(metabolic process);GO:0018193(peptidyl-amino acid modification);GO:0000209(protein polyubiquitination);GO:0016740(transferase activity);GO:0006807(nitrogen compound metabolic process);GO:0043170(macromolecule metabolic process);GO:0043412(macromolecule modific…	ko04120(Ubiquitin mediated proteolysis)
PC-3p-110122_70	BGI_novel_T006841	800	821	812	-32.1	-22.48	0.700312	9	2-15,820-807;19-21,803-801	1-1,821-821[UP5];16-18,806-804[SIL];22-22,800-800[UP3]	.(((...((((((((((((((.&.))))))))))))))...))).	UGGUUAUGUUGGCAAGAGUCCA&AGGAUUCUUGUUAACUUUGCUU	1	26.8255	4	0.999894	Output/S24h/cleaveLand_result/t_plot/PC-3p-110122_70_BGI_novel_T006841_812_TPlot.pdf	0	0	NA	NA	NA	26.8255	0	Inf	up	2.2264e-07	2.57434e-07	yes	GO:0016020(membrane);GO:0031224(intrinsic component of membrane);GO:0044425(membrane part);GO:0016021(integral component of membrane)	NA
PC-3p-110122_70	BGI_novel_T007586	375	399	390	-32.1	-21.28	0.662928	14.5	2-10,398-390;15-22,382-375	1-1,399-399[UP5];11-14,389-383[AILt]	((((((((.......(((((((((.&.)))))))))---....))))))))	AAGCGAAGGAGCCACCGAGAAUCCA&AGGAUUCUUG---UUAACUUUGCUU	3	80.4764	2	0.999711	Output/S24h/cleaveLand_result/t_plot/PC-3p-110122_70_BGI_novel_T007586_390_TPlot.pdf	0	0	NA	NA	NA	80.4764	0	Inf	up	2.9371e-19	3.48128e-18	yes	GO:0016787(hydrolase activity);GO:0048856(anatomical structure development);GO:0006298(mismatch repair);GO:0043233(organelle lumen);GO:0000793(condensed chromosome);GO:0033554(cellular response to stress);GO:0006950(response to stress);GO:0048229(gametophyte development);GO:0043227(membrane-bounded organelle);GO:0006310(DNA recombination);GO:0016887(ATPase activity);GO:0016817(hydrolase activity,…	ko03430(Mismatch repair)
PC-3p-110122_70	BGI_novel_T010583	398	418	410	-32.1	-21.3	0.663551	9	2-3,417-416;5-11,415-409;13-21,407-399	1-1,418-418[UP5];4-4,x-x[BULq];12-12,408-408[SIL];22-22,398-398[UP3]	.(((((((((.(((((((-((.&.)).))))))).))))))))).	UGGCAAGGUUUACAAGGG-CCA&AGGAUUCUUGUUAACUUUGCUU	0	0	NA	NA	NA	1	33.3045	4	1	Output/S8h/cleaveLand_result/t_plot/PC-3p-110122_70_BGI_novel_T010583_410_TPlot.pdf	0	33.3045	-Inf	down	7.8779e-09	1.51467e-08	yes	GO:0006468(protein phosphorylation);GO:0032553(ribonucleotide binding);GO:0009987(cellular process);GO:0097159(organic cyclic compound binding);GO:0043167(ion binding);GO:0019538(protein metabolic process);GO:0018193(peptidyl-amino acid modification);GO:0043168(anion binding);GO:0000166(nucleotide binding);GO:0032555(purine ribonucleotide binding);GO:0016772(transferase activity, transferring pho…	NA
PC-3p-110122_70	BGI_novel_T010933	542	564	555	-32.1	-21.8	0.679128	7	2-3,563-562;5-13,560-552;14-20,550-544	1-1,564-564[UP5];4-4,561-561[SIL];x-x,551-551[BULt];21-22,543-542[UP3]	..(((((((.(((((((((.((.&.)).)))))))))-)))))))..	UCGCGAGGUAUAACAAGAAACCA&AGGAUUCUUGUUA-ACUUUGCUU	1	26.8255	4	1	Output/S24h/cleaveLand_result/t_plot/PC-3p-110122_70_BGI_novel_T010933_555_TPlot.pdf	0	0	NA	NA	NA	26.8255	0	Inf	up	2.2264e-07	2.57434e-07	yes	GO:0043231(intracellular membrane-bounded organelle);GO:0046983(protein dimerization activity);GO:0043227(membrane-bounded organelle);GO:0005623(cell);GO:0097159(organic cyclic compound binding);GO:0032993(protein-DNA complex);GO:0046982(protein heterodimerization activity);GO:0044446(intracellular organelle part);GO:0005634(nucleus);GO:0003676(nucleic acid binding);GO:0044422(organelle part);GO:…	NA
PC-3p-110122_70	BGI_novel_T011252	1359	1379	1371	-32.1	-22.8	0.71028	10.5	2-8,1378-1372;11-21,1370-1360	1-1,1379-1379[UP5];9-10,1371-1371[AILq];22-22,1359-1359[UP3]	.(((((((((((.-(((((((.&.)))))))..))))))))))).	UGGCGAGGUUGAG-GGAGUCCC&AGGAUUCUUGUUAACUUUGCUU	0	0	NA	NA	NA	1	33.3045	4	0.997059	Output/S8h/cleaveLand_result/t_plot/PC-3p-110122_70_BGI_novel_T011252_1371_TPlot.pdf	0	33.3045	-Inf	down	7.8779e-09	1.51467e-08	yes	GO:0003677(DNA binding);GO:0009987(cellular process);GO:0051301(cell division);GO:0097159(organic cyclic compound binding);GO:0003676(nucleic acid binding);GO:1901363(heterocyclic compound binding);GO:0005488(binding)	ko03040(Spliceosome)
PC-3p-110122_70	BGI_novel_T012198	2484	2505	2495	-32.1	-20.9	0.65109	7.5	2-6,2504-2500;7-16,2498-2489;19-22,2487-2484	1-1,2505-2505[UP5];x-x,2499-2499[BULt];17-18,2488-2488[AILq]	((((.-((((((((((.(((((.&.)))))-))))))))))..))))	GAGCU-AGUUGACAAGAAAUCUA&AGGAUU-CUUGUUAACUUUGCUU	0	0	NA	NA	NA	1	33.3045	4	1	Output/S8h/cleaveLand_result/t_plot/PC-3p-110122_70_BGI_novel_T012198_2495_TPlot.pdf	0	33.3045	-Inf	down	7.8779e-09	1.51467e-08	yes	GO:0044257(cellular protein catabolic process);GO:0019538(protein metabolic process);GO:0044267(cellular protein metabolic process);GO:0043412(macromolecule modification);GO:0019783(ubiquitin-like protein-specific protease activity);GO:0101005(ubiquitinyl hydrolase activity);GO:0036211(protein modification process);GO:0006511(ubiquitin-dependent protein catabolic process);GO:0044237(cellular meta…	NA
PC-3p-110122_70	BGI_novel_T012512	1587	1609	1600	-32.1	-23.2	0.722741	4.5	1-14,1609-1596;15-22,1594-1587	x-x,1595-1595[BULt]	((((((((.((((((((((((((&))))))))))))))-))))))))	AAGCAAGGAUUAACAAGGAUUUU&AGGAUUCUUGUUAA-CUUUGCUU	1	26.8255	4	0.992937	Output/S24h/cleaveLand_result/t_plot/PC-3p-110122_70_BGI_novel_T012512_1600_TPlot.pdf	0	0	NA	NA	NA	26.8255	0	Inf	up	2.2264e-07	2.57434e-07	yes	GO:0006518(peptide metabolic process);GO:0016875(ligase activity, forming carbon-oxygen bonds);GO:0043043(peptide biosynthetic process);GO:0036094(small molecule binding);GO:0044249(cellular biosynthetic process);GO:0043168(anion binding);GO:0009058(biosynthetic process);GO:0043038(amino acid activation);GO:0044281(small molecule metabolic process);GO:1901576(organic substance biosynthetic proces…	ko00970(Aminoacyl-tRNA biosynthesis)
PC-3p-110122_70	BGI_novel_T013047	767	788	779	-32.1	-21.3	0.663551	6	2-3,787-786;5-14,784-775;16-22,773-767	1-1,788-788[UP5];4-4,785-785[SIL];15-15,774-774[SIL]	(((((((.((((((((((.((.&.)).)))))))))).)))))))	AAGCGAGAUUGACAAGAAGCCA&AGGAUUCUUGUUAACUUUGCUU	0	0	NA	NA	NA	1	33.3045	4	1	Output/S8h/cleaveLand_result/t_plot/PC-3p-110122_70_BGI_novel_T013047_779_TPlot.pdf	0	33.3045	-Inf	down	7.8779e-09	1.51467e-08	yes	GO:0008380(RNA splicing);GO:0044464(cell part);GO:0044424(intracellular part);GO:1901360(organic cyclic compound metabolic process);GO:0006725(cellular aromatic compound metabolic process);GO:0044238(primary metabolic process);GO:0044260(cellular macromolecule metabolic process);GO:0043227(membrane-bounded organelle);GO:0071704(organic substance metabolic process);GO:0005622(intracellular);GO:000…	NA
PC-3p-110122_70	XM_016078791.2	835	858	849	-32.1	-22.4	0.697819	8	2-10,857-849;11-12,846-845;15-22,842-835	1-1,858-858[UP5];x-x,848-847[BULt];13-14,844-843[SIL]	((((((((..((..(((((((((.&.)))))))))--))..))))))))	AAGCAAAGGCAAACCAGGAAUCCA&AGGAUUCUUG--UUAACUUUGCUU	0	0	NA	NA	NA	1	33.3045	4	0.999678	Output/S8h/cleaveLand_result/t_plot/PC-3p-110122_70_XM_016078791.2_849_TPlot.pdf	0	33.3045	-Inf	down	7.8779e-09	1.51467e-08	yes	GO:0016746(transferase activity, transferring acyl groups);GO:0016740(transferase activity);GO:0003824(catalytic activity);GO:0016747(transferase activity, transferring acyl groups other than amino-acyl groups)	NA
PC-3p-110122_70	XM_016079227.2	1805	1825	1817	-32.1	-21.2	0.660436	10	2-3,1824-1823;5-9,1822-1818;11-22,1816-1805	1-1,1825-1825[UP5];4-4,x-x[BULq];10-10,1817-1817[SIL]	((((((((((((.(((((-((.&.)).))))).))))))))))))	AGGCAAGGUUGAGGAGAG-CUG&AGGAUUCUUGUUAACUUUGCUU	0	0	NA	NA	NA	2	66.6089	3	0.857015	Output/S8h/cleaveLand_result/t_plot/PC-3p-110122_70_XM_016079227.2_1817_TPlot.pdf	0	66.6089	-Inf	down	3.3071e-16	2.22267e-15	yes	GO:0005623(cell);GO:0065007(biological regulation);GO:0050789(regulation of biological process);GO:0009987(cellular process);GO:0065008(regulation of biological quality);GO:0050794(regulation of cellular process);GO:0042592(homeostatic process);GO:0019725(cellular homeostasis);GO:0045454(cell redox homeostasis)	NA
PC-3p-110122_70	XM_016079967.2	1016	1037	1028	-32.1	-22.3	0.694704	9.5	3-9,1035-1029;11-21,1027-1017	1-2,1037-1036[UP5];10-10,1028-1028[SIL];22-22,1016-1016[UP3]	.(((((((((((.(((((((..&..))))))).))))))))))).	CAGUAGGGUUAGGGAGAAUCGC&AGGAUUCUUGUUAACUUUGCUU	1	26.8255	4	0.999961	Output/S24h/cleaveLand_result/t_plot/PC-3p-110122_70_XM_016079967.2_1028_TPlot.pdf	13	432.958	2	0.946062	Output/S8h/cleaveLand_result/t_plot/PC-3p-110122_70_XM_016079967.2_1028_TPlot.pdf	26.8255	432.958	-4.01255	down	5.0761e-80	1.50697e-77	yes	GO:0008270(zinc ion binding);GO:0019538(protein metabolic process);GO:0032446(protein modification by small protein conjugation);GO:0046872(metal ion binding);GO:0061659(ubiquitin-like protein ligase activity);GO:1901564(organonitrogen compound metabolic process);GO:0043632(modification-dependent macromolecule catabolic process);GO:0044257(cellular protein catabolic process);GO:0042787(protein ub…	NA
PC-3p-110122_70	XM_016080239.2	1999	2020	2011	-32.1	-21.6	0.672897	9.5	3-22,2018-1999	1-2,2020-2019[UP5]	((((((((((((((((((((..&..))))))))))))))))))))	AGGUGGGGUUAGCAAGGGUUGC&AGGAUUCUUGUUAACUUUGCUU	1	26.8255	4	1	Output/S24h/cleaveLand_result/t_plot/PC-3p-110122_70_XM_016080239.2_2011_TPlot.pdf	3	99.9134	2	0.993292	Output/S8h/cleaveLand_result/t_plot/PC-3p-110122_70_XM_016080239.2_2011_TPlot.pdf	26.8255	99.9134	-1.89707	down	8.4486e-11	3.48434e-10	yes	GO:0044464(cell part);GO:0043227(membrane-bounded organelle);GO:0043229(intracellular organelle);GO:0044424(intracellular part);GO:0005545(1-phosphatidylinositol binding);GO:0005543(phospholipid binding);GO:0043168(anion binding);GO:0043623(cellular protein complex assembly);GO:0097708(intracellular vesicle);GO:0070271(protein complex biogenesis);GO:0016043(cellular component organization);GO:006…	NA
PC-3p-110122_70	XM_016080239.2	557	577	568	-32.1	-22.4	0.697819	8.5	1-12,577-566;15-20,564-559	13-14,565-565[AILq];21-22,558-557[UP3]	..((((((.-((((((((((((&))))))))))))..))))))..	ACGCAGAGG-GAUGAGGAUCCU&AGGAUUCUUGUUAACUUUGCUU	3	80.4764	2	0.962189	Output/S24h/cleaveLand_result/t_plot/PC-3p-110122_70_XM_016080239.2_568_TPlot.pdf	0	0	NA	NA	NA	80.4764	0	Inf	up	2.9371e-19	3.48128e-18	yes	GO:0044464(cell part);GO:0043227(membrane-bounded organelle);GO:0043229(intracellular organelle);GO:0044424(intracellular part);GO:0005545(1-phosphatidylinositol binding);GO:0005543(phospholipid binding);GO:0043168(anion binding);GO:0043623(cellular protein complex assembly);GO:0097708(intracellular vesicle);GO:0070271(protein complex biogenesis);GO:0016043(cellular component organization);GO:006…	NA
PC-3p-110122_70	XM_016080430.2	1426	1446	1437	-32.1	-21.7	0.676012	10	2-11,1445-1436;15-21,1433-1427	1-1,1446-1446[UP5];12-14,1435-1434[AILq];22-22,1426-1426[UP3]	.(((((((..-((((((((((.&.))))))))))...))))))).	UGGCAGAGGU-GCAGGAAUUCA&AGGAUUCUUGUUAACUUUGCUU	1	26.8255	4	1	Output/S24h/cleaveLand_result/t_plot/PC-3p-110122_70_XM_016080430.2_1437_TPlot.pdf	0	0	NA	NA	NA	26.8255	0	Inf	up	2.2264e-07	2.57434e-07	yes	GO:0016835(carbon-oxygen lyase activity);GO:1902223(erythrose 4-phosphate/phosphoenolpyruvate family amino acid biosynthetic process);GO:0008652(cellular amino acid biosynthetic process);GO:0044464(cell part);GO:0043227(membrane-bounded organelle);GO:0004664(prephenate dehydratase activity);GO:0009532(plastid stroma);GO:1902221(erythrose 4-phosphate/phosphoenolpyruvate family amino acid metabolic…	ko00400(Phenylalanine, tyrosine and tryptophan biosynthesis);ko01100(Metabolic pathways);ko01230(Biosynthesis of amino acids);ko01110(Biosynthesis of secondary metabolites)
PC-3p-110122_70	XM_016081466.2	234	254	245	-32.1	-22.4	0.697819	8	2-13,253-242;15-21,241-235	1-1,254-254[UP5];14-14,x-x[BULq];22-22,234-234[UP3]	.(((((((-((((((((((((.&.)))))))))))).))))))).	UGGCAGAG-UGAUAGGAAUCUC&AGGAUUCUUGUUAACUUUGCUU	0	0	NA	NA	NA	2	66.6089	3	0.530059	Output/S8h/cleaveLand_result/t_plot/PC-3p-110122_70_XM_016081466.2_245_TPlot.pdf	0	66.6089	-Inf	down	3.3071e-16	2.22267e-15	yes	GO:0004659(prenyltransferase activity);GO:0043227(membrane-bounded organelle);GO:0009507(chloroplast);GO:0005737(cytoplasm);GO:0043229(intracellular organelle);GO:0003824(catalytic activity);GO:0005623(cell);GO:0044424(intracellular part);GO:0044444(cytoplasmic part);GO:0016765(transferase activity, transferring alkyl or aryl (other than methyl) groups);GO:0009536(plastid);GO:0005622(intracellula…	ko01110(Biosynthesis of secondary metabolites);ko00130(Ubiquinone and other terpenoid-quinone biosynthesis);ko01100(Metabolic pathways)
PC-3p-110122_70	XM_016082058.2	801	824	813	-32.1	-22	0.685358	11.5	1-9,824-816;10-11,813-812;13-20,810-803	x-x,815-814[BULt];12-12,811-811[SIL];21-22,802-801[UP3]	..((((((((.((..(((((((((&)))))))))--)).))))))))..	AUGCAAGGUUUGCCAGAGGAUCCU&AGGAUUCUU--GUUAACUUUGCUU	1	26.8255	4	0.999998	Output/S24h/cleaveLand_result/t_plot/PC-3p-110122_70_XM_016082058.2_813_TPlot.pdf	0	0	NA	NA	NA	26.8255	0	Inf	up	2.2264e-07	2.57434e-07	yes	GO:0043168(anion binding);GO:0044267(cellular protein metabolic process);GO:0016772(transferase activity, transferring phosphorus-containing groups);GO:0030554(adenyl nucleotide binding);GO:0006793(phosphorus metabolic process);GO:0006796(phosphate-containing compound metabolic process);GO:0016740(transferase activity);GO:0016310(phosphorylation);GO:1901265(nucleoside phosphate binding);GO:003621…	NA
PC-3p-110122_70	XM_016082314.2	2144	2163	2154	-32.1	-21.4	0.666667	7.5	2-16,2162-2148;19-21,2147-2145	1-1,2163-2163[UP5];17-18,x-x[BULq];22-22,2144-2144[UP3]	.(((--(((((((((((((((.&.)))))))))))))))..))).	UAGU--AGUUAACGGGGAUCCA&AGGAUUCUUGUUAACUUUGCUU	1	26.8255	4	1	Output/S24h/cleaveLand_result/t_plot/PC-3p-110122_70_XM_016082314.2_2154_TPlot.pdf	0	0	NA	NA	NA	26.8255	0	Inf	up	2.2264e-07	2.57434e-07	yes	NA	ko03013(RNA transport)
PC-3p-110122_70	XM_016082670.2	500	523	512	-32.1	-25.9	0.806854	6.5	1-3,523-521;4-21,518-501	x-x,520-519[BULt];22-22,500-500[UP3]	.((((((((((((((((((..(((&)))--)))))))))))))))))).	UGGCGAGGUUAACAAGAAUGACCU&AGG--AUUCUUGUUAACUUUGCUU	6	160.953	2	0.238296	Output/S24h/cleaveLand_result/t_plot/PC-3p-110122_70_XM_016082670.2_512_TPlot.pdf	0	0	NA	NA	NA	160.953	0	Inf	up	6.9605e-37	4.29381e-35	yes	GO:0003824(catalytic activity);GO:0015399(primary active transmembrane transporter activity);GO:0005773(vacuole);GO:0016817(hydrolase activity, acting on acid anhydrides);GO:0031090(organelle membrane);GO:0005623(cell);GO:0098805(whole membrane);GO:0043227(membrane-bounded organelle);GO:0016462(pyrophosphatase activity);GO:0005794(Golgi apparatus);GO:0016020(membrane);GO:0043492(ATPase activity, …	ko00190(Oxidative phosphorylation);ko04145(Phagosome);ko01100(Metabolic pathways)
PC-3p-110122_70	XM_016083881.2	2238	2258	2250	-32.1	-21.1	0.657321	9.5	2-6,2257-2253;10-22,2250-2238	1-1,2258-2258[UP5];7-9,2252-2251[AILq]	(((((((((((((..-(((((.&.)))))...)))))))))))))	AAGCGAAGUUGGCCA-AAUCCA&AGGAUUCUUGUUAACUUUGCUU	1	26.8255	4	1	Output/S24h/cleaveLand_result/t_plot/PC-3p-110122_70_XM_016083881.2_2250_TPlot.pdf	0	0	NA	NA	NA	26.8255	0	Inf	up	2.2264e-07	2.57434e-07	yes	NA	NA
PC-3p-110122_70	XM_016084212.2	751	771	763	-32.1	-21.2	0.660436	8	2-9,770-763;11-21,762-752	1-1,771-771[UP5];10-10,x-x[BULq];22-22,751-751[UP3]	.(((((((((((-((((((((.&.)))))))).))))))))))).	UGGCAAGGUUAG-AAGGAUCUC&AGGAUUCUUGUUAACUUUGCUU	1	26.8255	4	1	Output/S24h/cleaveLand_result/t_plot/PC-3p-110122_70_XM_016084212.2_763_TPlot.pdf	0	0	NA	NA	NA	26.8255	0	Inf	up	2.2264e-07	2.57434e-07	yes	NA	NA
PC-3p-110122_70	XM_016084270.2	318	339	330	-32.1	-26.5	0.825545	6	2-4,338-336;7-22,333-318	1-1,339-339[UP5];5-6,335-334[SIL]	((((((((((((((((..(((.&.)))..))))))))))))))))	GAGCAAGGUUAACAAGCCUCCA&AGGAUUCUUGUUAACUUUGCUU	1	26.8255	4	0.426464	Output/S24h/cleaveLand_result/t_plot/PC-3p-110122_70_XM_016084270.2_330_TPlot.pdf	1	33.3045	4	0.373755	Output/S8h/cleaveLand_result/t_plot/PC-3p-110122_70_XM_016084270.2_330_TPlot.pdf	26.8255	33.3045	-0.312112	down	0.40341	0.405116	yes	GO:0003735(structural constituent of ribosome);GO:0043228(non-membrane-bounded organelle);GO:0071704(organic substance metabolic process);GO:0006518(peptide metabolic process);GO:0043232(intracellular non-membrane-bounded organelle);GO:0043043(peptide biosynthetic process);GO:0022625(cytosolic large ribosomal subunit);GO:0022626(cytosolic ribosome);GO:0044237(cellular metabolic process);GO:000519…	ko03010(Ribosome)
PC-3p-110122_70	XM_016085507.2	2475	2496	2486	-32.1	-20.9	0.65109	7.5	2-6,2495-2491;7-16,2489-2480;19-22,2478-2475	1-1,2496-2496[UP5];x-x,2490-2490[BULt];17-18,2479-2479[AILq]	((((.-((((((((((.(((((.&.)))))-))))))))))..))))	GAGCU-AGUUGACAAGAAAUCUA&AGGAUU-CUUGUUAACUUUGCUU	0	0	NA	NA	NA	1	33.3045	4	1	Output/S8h/cleaveLand_result/t_plot/PC-3p-110122_70_XM_016085507.2_2486_TPlot.pdf	0	33.3045	-Inf	down	7.8779e-09	1.51467e-08	yes	GO:0044257(cellular protein catabolic process);GO:0019538(protein metabolic process);GO:0044267(cellular protein metabolic process);GO:0043412(macromolecule modification);GO:0019783(ubiquitin-like protein-specific protease activity);GO:0101005(ubiquitinyl hydrolase activity);GO:0036211(protein modification process);GO:0006511(ubiquitin-dependent protein catabolic process);GO:0044237(cellular meta…	NA
PC-3p-110122_70	XM_016085509.2	2474	2495	2485	-32.1	-20.9	0.65109	7.5	2-6,2494-2490;7-16,2488-2479;19-22,2477-2474	1-1,2495-2495[UP5];x-x,2489-2489[BULt];17-18,2478-2478[AILq]	((((.-((((((((((.(((((.&.)))))-))))))))))..))))	GAGCU-AGUUGACAAGAAAUCUA&AGGAUU-CUUGUUAACUUUGCUU	2	53.6509	1	0.434036	Output/S24h/cleaveLand_result/t_plot/PC-3p-110122_70_XM_016085509.2_2485_TPlot.pdf	0	0	NA	NA	NA	53.6509	0	Inf	up	2.3929e-13	1.027e-12	yes	GO:0044257(cellular protein catabolic process);GO:0019538(protein metabolic process);GO:0044267(cellular protein metabolic process);GO:0043412(macromolecule modification);GO:0019783(ubiquitin-like protein-specific protease activity);GO:0101005(ubiquitinyl hydrolase activity);GO:0036211(protein modification process);GO:0006511(ubiquitin-dependent protein catabolic process);GO:0044237(cellular meta…	NA
PC-3p-110122_70	XM_016085670.2	391	413	404	-32.1	-21.8	0.679128	7	2-3,412-411;5-13,409-401;14-20,399-393	1-1,413-413[UP5];4-4,410-410[SIL];x-x,400-400[BULt];21-22,392-391[UP3]	..(((((((.(((((((((.((.&.)).)))))))))-)))))))..	UCGCGAGGUAUAACAAGAAACCA&AGGAUUCUUGUUA-ACUUUGCUU	2	53.6509	3	0.777179	Output/S24h/cleaveLand_result/t_plot/PC-3p-110122_70_XM_016085670.2_404_TPlot.pdf	3	99.9134	2	0.98701	Output/S8h/cleaveLand_result/t_plot/PC-3p-110122_70_XM_016085670.2_404_TPlot.pdf	53.6509	99.9134	-0.897075	down	0.00018894	0.000209725	yes	GO:0043227(membrane-bounded organelle);GO:0003676(nucleic acid binding);GO:0000786(nucleosome);GO:1901363(heterocyclic compound binding);GO:0044815(DNA packaging complex);GO:0046983(protein dimerization activity);GO:0097159(organic cyclic compound binding);GO:0043231(intracellular membrane-bounded organelle);GO:0044424(intracellular part);GO:0043228(non-membrane-bounded organelle);GO:0032991(macr…	NA
PC-3p-110122_70	XM_016086542.2	1576	1598	1589	-32.1	-23.2	0.722741	4.5	1-14,1598-1585;15-22,1583-1576	x-x,1584-1584[BULt]	((((((((.((((((((((((((&))))))))))))))-))))))))	AAGCAAGGAUUAACAAGGAUUUU&AGGAUUCUUGUUAA-CUUUGCUU	1	26.8255	4	0.995404	Output/S24h/cleaveLand_result/t_plot/PC-3p-110122_70_XM_016086542.2_1589_TPlot.pdf	1	33.3045	4	0.989233	Output/S8h/cleaveLand_result/t_plot/PC-3p-110122_70_XM_016086542.2_1589_TPlot.pdf	26.8255	33.3045	-0.312112	down	0.40341	0.405116	yes	GO:0006518(peptide metabolic process);GO:0016875(ligase activity, forming carbon-oxygen bonds);GO:0043043(peptide biosynthetic process);GO:0036094(small molecule binding);GO:0044249(cellular biosynthetic process);GO:0043168(anion binding);GO:0009058(biosynthetic process);GO:0043038(amino acid activation);GO:0044281(small molecule metabolic process);GO:1901576(organic substance biosynthetic proces…	ko00970(Aminoacyl-tRNA biosynthesis)
PC-3p-110122_70	XM_016086828.2	251	270	262	-32.1	-22.5	0.700935	6	2-8,269-263;10-17,262-255;19-22,254-251	1-1,270-270[UP5];9-9,x-x[BULq];18-18,x-x[BULq]	((((-((((((((-(((((((.&.))))))).)))))))).))))	GAGC-GAGUUAAC-GGAAUCCG&AGGAUUCUUGUUAACUUUGCUU	1	26.8255	4	0.999828	Output/S24h/cleaveLand_result/t_plot/PC-3p-110122_70_XM_016086828.2_262_TPlot.pdf	2	66.6089	2	0.917203	Output/S8h/cleaveLand_result/t_plot/PC-3p-110122_70_XM_016086828.2_262_TPlot.pdf	26.8255	66.6089	-1.31211	down	3.8576e-05	4.31118e-05	yes	GO:0009813(flavonoid biosynthetic process);GO:0009058(biosynthetic process);GO:0009812(flavonoid metabolic process);GO:0016872(intramolecular lyase activity);GO:0003824(catalytic activity);GO:0045430(chalcone isomerase activity);GO:1901576(organic substance biosynthetic process);GO:0016853(isomerase activity);GO:0008152(metabolic process);GO:0071704(organic substance metabolic process)	ko01100(Metabolic pathways);ko01110(Biosynthesis of secondary metabolites);ko00941(Flavonoid biosynthesis)
PC-3p-110122_70	XM_016087838.2	1542	1565	1553	-32.1	-20.9	0.65109	9	1-5,1565-1561;6-18,1557-1545;20-22,1544-1542	x-x,1560-1558[BULt];19-19,x-x[BULq]	(((-(((((((((((((...(((((&)))))---))))))))))))).)))	GAG-AAGGUUAACAGGAAAUAUCCU&AGGAU---UCUUGUUAACUUUGCUU	3	80.4764	2	0.999985	Output/S24h/cleaveLand_result/t_plot/PC-3p-110122_70_XM_016087838.2_1553_TPlot.pdf	2	66.6089	3	0.924362	Output/S8h/cleaveLand_result/t_plot/PC-3p-110122_70_XM_016087838.2_1553_TPlot.pdf	80.4764	66.6089	0.27285	up	0.25284	0.265574	yes	GO:0030880(RNA polymerase complex);GO:0005622(intracellular);GO:1901564(organonitrogen compound metabolic process);GO:0043234(protein complex);GO:0044451(nucleoplasm part);GO:2001141(regulation of RNA biosynthetic process);GO:0008152(metabolic process);GO:0009891(positive regulation of biosynthetic process);GO:0006357(regulation of transcription from RNA polymerase II promoter);GO:0008023(transcr…	NA
PC-3p-110122_70	XM_016088364.2	4077	4100	4091	-32.1	-23.3	0.725857	7	1-18,4100-4083;19-21,4080-4078	x-x,4082-4081[BULt];22-22,4077-4077[UP3]	.(((..((((((((((((((((((&))))))))))))))))))--))).	CAGUUUGAAGUUGACAAGAGUCUU&AGGAUUCUUGUUAACUUU--GCUU	0	0	NA	NA	NA	1	33.3045	4	0.979178	Output/S8h/cleaveLand_result/t_plot/PC-3p-110122_70_XM_016088364.2_4091_TPlot.pdf	0	33.3045	-Inf	down	7.8779e-09	1.51467e-08	yes	NA	NA
PC-3p-110122_70	XM_016089588.2	1502	1529	1520	-32.1	-23.5	0.732087	17.5	2-10,1528-1520;11-21,1513-1503	1-1,1529-1529[UP5];x-x,1519-1514[BULt];22-22,1502-1502[UP3]	.(((((((((((......(((((((((.&.)))))))))------))))))))))).	UGGCAAAGUUGAAACCUUCGGGAAUCCA&AGGAUUCUUG------UUAACUUUGCUU	1	26.8255	4	0.976244	Output/S24h/cleaveLand_result/t_plot/PC-3p-110122_70_XM_016089588.2_1520_TPlot.pdf	0	0	NA	NA	NA	26.8255	0	Inf	up	2.2264e-07	2.57434e-07	yes	GO:0016021(integral component of membrane);GO:0043231(intracellular membrane-bounded organelle);GO:0003677(DNA binding);GO:0043226(organelle);GO:0043229(intracellular organelle);GO:0005488(binding);GO:0097159(organic cyclic compound binding);GO:1901363(heterocyclic compound binding);GO:0003676(nucleic acid binding);GO:0044424(intracellular part);GO:0005623(cell);GO:0005634(nucleus);GO:0016020(mem…	ko04075(Plant hormone signal transduction)
PC-3p-110122_70	XM_016093246.2	2796	2821	2808	-32.1	-21.1	0.657321	13.5	1-2,2821-2820;4-9,2818-2813;10-22,2808-2796	3-3,2819-2819[SIL];x-x,2812-2809[BULt]	(((((((((((((....((((((.((&)).))))))----)))))))))))))	AAGUAAAGUUGGCUACCGAGAAUGCU&AGGAUUCUU----GUUAACUUUGCUU	1	26.8255	4	1	Output/S24h/cleaveLand_result/t_plot/PC-3p-110122_70_XM_016093246.2_2808_TPlot.pdf	0	0	NA	NA	NA	26.8255	0	Inf	up	2.2264e-07	2.57434e-07	yes	NA	NA
PC-3p-110122_70	XM_016093976.2	444	465	457	-32.1	-22.5	0.700935	9	2-3,464-463;5-12,462-455;13-22,453-444	1-1,465-465[UP5];4-4,x-x[BULq];x-x,454-454[BULt]	((((((((((.((((((((-((.&.)).))))))))-))))))))))	GGGCAAAGUUGGGCAGGAA-CCA&AGGAUUCUUGUU-AACUUUGCUU	1	26.8255	4	0.999879	Output/S24h/cleaveLand_result/t_plot/PC-3p-110122_70_XM_016093976.2_457_TPlot.pdf	0	0	NA	NA	NA	26.8255	0	Inf	up	2.2264e-07	2.57434e-07	yes	GO:0032549(ribonucleoside binding);GO:0000166(nucleotide binding);GO:0043168(anion binding);GO:0097367(carbohydrate derivative binding);GO:0019001(guanyl nucleotide binding);GO:0036094(small molecule binding);GO:0032555(purine ribonucleotide binding);GO:0005488(binding);GO:0017076(purine nucleotide binding);GO:0001883(purine nucleoside binding);GO:0016787(hydrolase activity);GO:0032550(purine rib…	NA
PC-3p-110122_70	XM_016095903.2	675	698	687	-32.1	-21.2	0.660436	12.5	2-5,697-694;6-19,691-678	1-1,698-698[UP5];x-x,693-692[BULt];20-22,677-675[UP3]	...((((((((((((((..((((.&.))))--))))))))))))))...	CCUCAGAGUUGACGGGAAGGUCCG&AGGAU--UCUUGUUAACUUUGCUU	6	160.953	2	0.999814	Output/S24h/cleaveLand_result/t_plot/PC-3p-110122_70_XM_016095903.2_687_TPlot.pdf	0	0	NA	NA	NA	160.953	0	Inf	up	6.9605e-37	4.29381e-35	yes	GO:0031226(intrinsic component of plasma membrane);GO:0050789(regulation of biological process);GO:0005886(plasma membrane);GO:0007165(signal transduction);GO:0044464(cell part);GO:0006952(defense response);GO:0030054(cell junction);GO:0046658(anchored component of plasma membrane);GO:0050896(response to stimulus);GO:0005911(cell-cell junction);GO:0065007(biological regulation);GO:0016020(membran…	NA
PC-3p-110122_70	XM_016096010.2	891	913	904	-32.1	-21.2	0.660436	9	3-11,911-903;12-21,901-892	1-2,913-912[UP5];x-x,902-902[BULt];22-22,891-891[UP3]	.((((((((((.(((((((((..&..)))))))))-)))))))))).	CAGUGAAGUUGUACAAGGAUCAC&AGGAUUCUUGU-UAACUUUGCUU	1	26.8255	4	1	Output/S24h/cleaveLand_result/t_plot/PC-3p-110122_70_XM_016096010.2_904_TPlot.pdf	1	33.3045	4	1	Output/S8h/cleaveLand_result/t_plot/PC-3p-110122_70_XM_016096010.2_904_TPlot.pdf	26.8255	33.3045	-0.312112	down	0.40341	0.405116	yes	GO:0044425(membrane part);GO:0016021(integral component of membrane);GO:0016020(membrane);GO:0031224(intrinsic component of membrane)	NA
PC-3p-110122_70	XM_016096287.2	357	378	369	-32.1	-21.6	0.672897	8	2-2,377-377;4-9,375-370;11-17,368-362;19-22,360-357	1-1,378-378[UP5];3-3,376-376[SIL];10-10,369-369[SIL];18-18,361-361[SIL]	((((.(((((((.((((((.(.&.).)))))).))))))).))))	GAGCUGAGUUGAGAAGAAUGCA&AGGAUUCUUGUUAACUUUGCUU	1	26.8255	4	1	Output/S24h/cleaveLand_result/t_plot/PC-3p-110122_70_XM_016096287.2_369_TPlot.pdf	0	0	NA	NA	NA	26.8255	0	Inf	up	2.2264e-07	2.57434e-07	yes	NA	NA
PC-3p-110122_70	XM_016097141.2	1595	1617	1608	-32.1	-21.6	0.672897	9	3-10,1615-1608;11-16,1606-1601;18-22,1599-1595	1-2,1617-1616[UP5];x-x,1607-1607[BULt];17-17,1600-1600[SIL]	(((((.((((((.((((((((..&..))))))))-)))))).)))))	AGGCAUGGUUGAUCGAGAAUCAU&AGGAUUCUUG-UUAACUUUGCUU	0	0	NA	NA	NA	4	133.218	2	0.994199	Output/S8h/cleaveLand_result/t_plot/PC-3p-110122_70_XM_016097141.2_1608_TPlot.pdf	0	133.218	-Inf	down	8.0653e-31	3.04653e-29	yes	GO:0000166(nucleotide binding);GO:0016628(oxidoreductase activity, acting on the CH-CH group of donors, NAD or NADP as acceptor);GO:0048037(cofactor binding);GO:0016021(integral component of membrane);GO:0043168(anion binding);GO:0016020(membrane);GO:1901265(nucleoside phosphate binding);GO:0005488(binding);GO:0008202(steroid metabolic process);GO:0016614(oxidoreductase activity, acting on CH-OH …	ko01100(Metabolic pathways);ko01110(Biosynthesis of secondary metabolites);ko00100(Steroid biosynthesis)
PC-3p-110122_70	XM_016097382.2	663	685	675	-32.1	-22.6	0.70405	8	1-6,685-680;7-13,678-672;15-20,670-665	x-x,679-679[BULt];14-14,671-671[SIL];21-22,664-663[UP3]	..((((((.(((((((.((((((&))))))-))))))).))))))..	CUGCAAAGAUGGCAAGUGAUCCU&AGGAUU-CUUGUUAACUUUGCUU	0	0	NA	NA	NA	1	33.3045	4	0.998542	Output/S8h/cleaveLand_result/t_plot/PC-3p-110122_70_XM_016097382.2_675_TPlot.pdf	0	33.3045	-Inf	down	7.8779e-09	1.51467e-08	yes	GO:0016020(membrane)	NA
PC-3p-110122_70	XM_016097640.2	1755	1780	1771	-32.1	-21.16	0.65919	13.5	2-12,1779-1769;15-22,1762-1755	1-1,1780-1780[UP5];13-14,1768-1763[AILt]	((((((((......(((((((((((.&.)))))))))))----..))))))))	AAGCAGAGAGGGUGAGCAAGAAUUCA&AGGAUUCUUGUU----AACUUUGCUU	0	0	NA	NA	NA	1	33.3045	4	1	Output/S8h/cleaveLand_result/t_plot/PC-3p-110122_70_XM_016097640.2_1771_TPlot.pdf	0	33.3045	-Inf	down	7.8779e-09	1.51467e-08	yes	NA	ko03013(RNA transport)
PC-3p-110122_70	XM_016097901.2	1216	1240	1231	-32.1	-22.4	0.697819	5.5	2-13,1239-1228;14-16,1226-1224;17-21,1221-1217	1-1,1240-1240[UP5];x-x,1227-1227[BULt];x-x,1223-1222[BULt];22-22,1216-1216[UP3]	.(((((..(((.((((((((((((.&.))))))))))))-)))--))))).	CAGCGAUCAGUGUAACAAGAAUCCC&AGGAUUCUUGUUA-ACU--UUGCUU	1	26.8255	4	0.999949	Output/S24h/cleaveLand_result/t_plot/PC-3p-110122_70_XM_016097901.2_1231_TPlot.pdf	0	0	NA	NA	NA	26.8255	0	Inf	up	2.2264e-07	2.57434e-07	yes	NA	NA
PC-3p-110122_70	XM_016101943.2	325	345	337	-32.1	-22.1	0.688474	7	2-5,344-341;7-12,340-335;15-21,332-326	1-1,345-345[UP5];6-6,x-x[BULq];13-14,334-333[SIL];22-22,325-325[UP3]	.(((((((..((((((-((((.&.)))).))))))..))))))).	CGGCAAGGGCAACAAG-AUCCG&AGGAUUCUUGUUAACUUUGCUU	1	26.8255	4	0.999991	Output/S24h/cleaveLand_result/t_plot/PC-3p-110122_70_XM_016101943.2_337_TPlot.pdf	5	166.522	2	0.964605	Output/S8h/cleaveLand_result/t_plot/PC-3p-110122_70_XM_016101943.2_337_TPlot.pdf	26.8255	166.522	-2.63404	down	9.467e-24	2.36675e-22	yes	GO:0016020(membrane);GO:0044425(membrane part);GO:0016021(integral component of membrane);GO:0031224(intrinsic component of membrane)	ko00190(Oxidative phosphorylation);ko01100(Metabolic pathways)
PC-3p-110122_70	XM_016103578.2	801	824	815	-32.1	-21.3	0.663551	9.5	2-10,823-815;12-13,813-812;14-22,809-801	1-1,824-824[UP5];11-11,814-814[SIL];x-x,811-810[BULt]	(((((((((..((.(((((((((.&.))))))))).))--)))))))))	GAGCAGGGUCUUGUUAAGGAUCCA&AGGAUUCUUGUUA--ACUUUGCUU	0	0	NA	NA	NA	1	33.3045	4	1	Output/S8h/cleaveLand_result/t_plot/PC-3p-110122_70_XM_016103578.2_815_TPlot.pdf	0	33.3045	-Inf	down	7.8779e-09	1.51467e-08	yes	GO:0006629(lipid metabolic process);GO:0008233(peptidase activity);GO:0016787(hydrolase activity);GO:1901575(organic substance catabolic process);GO:0030163(protein catabolic process);GO:0008152(metabolic process);GO:0004175(endopeptidase activity);GO:0043170(macromolecule metabolic process);GO:0003824(catalytic activity);GO:0019538(protein metabolic process);GO:0044238(primary metabolic process)…	NA
PC-3p-110122_70	XM_016104362.2	1197	1218	1209	-32.1	-21	0.654206	11	2-5,1217-1214;7-12,1212-1207;15-20,1204-1199	1-1,1218-1218[UP5];6-6,1213-1213[SIL];13-14,1206-1205[SIL];21-22,1198-1197[UP3]	..((((((..((((((.((((.&.)))).))))))..))))))..	UUGCAGGGGAAGCAGGUGUCCC&AGGAUUCUUGUUAACUUUGCUU	1	26.8255	4	1	Output/S24h/cleaveLand_result/t_plot/PC-3p-110122_70_XM_016104362.2_1209_TPlot.pdf	0	0	NA	NA	NA	26.8255	0	Inf	up	2.2264e-07	2.57434e-07	yes	GO:0032555(purine ribonucleotide binding);GO:0006807(nitrogen compound metabolic process);GO:1901265(nucleoside phosphate binding);GO:0036094(small molecule binding);GO:0046872(metal ion binding);GO:0046914(transition metal ion binding);GO:0016787(hydrolase activity);GO:0000166(nucleotide binding);GO:0008270(zinc ion binding);GO:0043168(anion binding);GO:0097367(carbohydrate derivative binding);G…	NA
PC-3p-110122_70	XM_016105930.2	1381	1402	1393	-32.1	-23.5	0.732087	9	2-2,1401-1401;5-21,1398-1382	1-1,1402-1402[UP5];3-4,1400-1399[SIL];22-22,1381-1381[UP3]	.(((((((((((((((((..(.&.)..))))))))))))))))).	UGGCAAGGUUAACAGGAGCACA&AGGAUUCUUGUUAACUUUGCUU	2	53.6509	2	0.743593	Output/S24h/cleaveLand_result/t_plot/PC-3p-110122_70_XM_016105930.2_1393_TPlot.pdf	3	99.9134	2	0.675619	Output/S8h/cleaveLand_result/t_plot/PC-3p-110122_70_XM_016105930.2_1393_TPlot.pdf	53.6509	99.9134	-0.897075	down	0.00018894	0.000209725	yes	GO:0016021(integral component of membrane);GO:0031224(intrinsic component of membrane);GO:0044425(membrane part);GO:0016020(membrane)	ko03013(RNA transport);ko03008(Ribosome biogenesis in eukaryotes)
PC-3p-110122_70	XM_016105931.2	1386	1407	1398	-32.1	-23.5	0.732087	9	2-2,1406-1406;5-21,1403-1387	1-1,1407-1407[UP5];3-4,1405-1404[SIL];22-22,1386-1386[UP3]	.(((((((((((((((((..(.&.)..))))))))))))))))).	UGGCAAGGUUAACAGGAGCACA&AGGAUUCUUGUUAACUUUGCUU	2	53.6509	2	0.710054	Output/S24h/cleaveLand_result/t_plot/PC-3p-110122_70_XM_016105931.2_1398_TPlot.pdf	0	0	NA	NA	NA	53.6509	0	Inf	up	2.3929e-13	1.027e-12	yes	GO:0016021(integral component of membrane);GO:0031224(intrinsic component of membrane);GO:0044425(membrane part);GO:0016020(membrane)	ko03013(RNA transport);ko03008(Ribosome biogenesis in eukaryotes)
PC-3p-110122_70	XM_016105946.2	632	654	644	-32.1	-22.4	0.697819	13.5	2-9,653-646;14-22,640-632	1-1,654-654[UP5];10-13,645-641[AILt]	(((((((((.....((((((((.&.))))))))-....)))))))))	GAGCGAGGUGUUAAGAGAGUCCG&AGGAUUCUU-GUUAACUUUGCUU	1	26.8255	4	0.999931	Output/S24h/cleaveLand_result/t_plot/PC-3p-110122_70_XM_016105946.2_644_TPlot.pdf	3	99.9134	2	0.936254	Output/S8h/cleaveLand_result/t_plot/PC-3p-110122_70_XM_016105946.2_644_TPlot.pdf	26.8255	99.9134	-1.89707	down	8.4486e-11	3.48434e-10	yes	GO:0043167(ion binding);GO:0071704(organic substance metabolic process);GO:0004619(phosphoglycerate mutase activity);GO:0044424(intracellular part);GO:0008152(metabolic process);GO:1901575(organic substance catabolic process);GO:0044282(small molecule catabolic process);GO:0016868(intramolecular transferase activity, phosphotransferases);GO:0046914(transition metal ion binding);GO:0009056(catabol…	ko01230(Biosynthesis of amino acids);ko01110(Biosynthesis of secondary metabolites);ko00260(Glycine, serine and threonine metabolism);ko01200(Carbon metabolism);ko00010(Glycolysis / Gluconeogenesis);ko01100(Metabolic pathways)
PC-3p-110122_70	XM_016107246.2	648	670	661	-32.1	-22.32	0.695327	9	1-11,670-660;15-22,655-648	12-14,659-656[AILt]	((((((((....(((((((((((&)))))))))))-...))))))))	AGGUAGGGAGAUACAAGAGUCCU&AGGAUUCUUGU-UAACUUUGCUU	0	0	NA	NA	NA	2	66.6089	3	0.557067	Output/S8h/cleaveLand_result/t_plot/PC-3p-110122_70_XM_016107246.2_661_TPlot.pdf	0	66.6089	-Inf	down	3.3071e-16	2.22267e-15	yes	GO:1901566(organonitrogen compound biosynthetic process);GO:0016866(intramolecular transferase activity);GO:0044238(primary metabolic process);GO:1901564(organonitrogen compound metabolic process);GO:0006807(nitrogen compound metabolic process);GO:0046394(carboxylic acid biosynthetic process);GO:0043648(dicarboxylic acid metabolic process);GO:0009073(aromatic amino acid family biosynthetic proces…	ko01110(Biosynthesis of secondary metabolites);ko00400(Phenylalanine, tyrosine and tryptophan biosynthesis);ko01230(Biosynthesis of amino acids);ko01100(Metabolic pathways)
PC-3p-110122_70	XM_016108333.2	1513	1535	1526	-32.1	-21.4	0.666667	7.5	2-9,1534-1527;11-18,1525-1518;19-20,1516-1515	1-1,1535-1535[UP5];10-10,1526-1526[SIL];x-x,1517-1517[BULt];21-22,1514-1513[UP3]	..((.((((((((.((((((((.&.)))))))).))))))))-))..	AUGUGAAAGUUGAGAAGAAUCCA&AGGAUUCUUGUUAACUUU-GCUU	0	0	NA	NA	NA	1	33.3045	4	1	Output/S8h/cleaveLand_result/t_plot/PC-3p-110122_70_XM_016108333.2_1526_TPlot.pdf	0	33.3045	-Inf	down	7.8779e-09	1.51467e-08	yes	GO:0043226(organelle);GO:0044464(cell part);GO:0016853(isomerase activity);GO:0044260(cellular macromolecule metabolic process);GO:0008152(metabolic process);GO:0018193(peptidyl-amino acid modification);GO:0000209(protein polyubiquitination);GO:0016740(transferase activity);GO:0006807(nitrogen compound metabolic process);GO:0043170(macromolecule metabolic process);GO:0043412(macromolecule modific…	ko04120(Ubiquitin mediated proteolysis)
PC-3p-110122_70	XM_016109110.2	637	658	649	-32.1	-22.1	0.688474	9	2-8,657-651;10-22,649-637	1-1,658-658[UP5];9-9,650-650[SIL]	(((((((((((((.(((((((.&.))))))).)))))))))))))	AGGCAAGGUUGGCCAGAGUUUG&AGGAUUCUUGUUAACUUUGCUU	1	26.8255	4	0.999989	Output/S24h/cleaveLand_result/t_plot/PC-3p-110122_70_XM_016109110.2_649_TPlot.pdf	0	0	NA	NA	NA	26.8255	0	Inf	up	2.2264e-07	2.57434e-07	yes	GO:0044238(primary metabolic process);GO:0008171(O-methyltransferase activity);GO:0044237(cellular metabolic process);GO:0016740(transferase activity);GO:0008757(S-adenosylmethionine-dependent methyltransferase activity);GO:0006464(cellular protein modification process);GO:0016741(transferase activity, transferring one-carbon groups);GO:0010340(carboxyl-O-methyltransferase activity);GO:0008152(me…	NA
PC-3p-110122_70	XM_016109136.2	1097	1117	1108	-32.1	-25.1	0.781931	4	1-13,1117-1105;15-18,1104-1101;20-22,1099-1097	14-14,x-x[BULq];19-19,1100-1100[SIL]	(((.((((-(((((((((((((&))))))))))))).)))).)))	GAGGGAAG-UAGCAAGAAUCCU&AGGAUUCUUGUUAACUUUGCUU	0	0	NA	NA	NA	1	33.3045	4	0.544844	Output/S8h/cleaveLand_result/t_plot/PC-3p-110122_70_XM_016109136.2_1108_TPlot.pdf	0	33.3045	-Inf	down	7.8779e-09	1.51467e-08	yes	GO:0032555(purine ribonucleotide binding);GO:0072524(pyridine-containing compound metabolic process);GO:0043167(ion binding);GO:0046496(nicotinamide nucleotide metabolic process);GO:0055082(cellular chemical homeostasis);GO:0019637(organophosphate metabolic process);GO:0055086(nucleobase-containing small molecule metabolic process);GO:0016773(phosphotransferase activity, alcohol group as acceptor…	ko00500(Starch and sucrose metabolism);ko00052(Galactose metabolism);ko01100(Metabolic pathways);ko00051(Fructose and mannose metabolism);ko00010(Glycolysis / Gluconeogenesis);ko00520(Amino sugar and nucleotide sugar metabolism);ko01110(Biosynthesis of secondary metabolites);ko01200(Carbon metabolism)
PC-3p-110122_70	XM_016110039.2	2559	2580	2571	-32.1	-21	0.654206	8.5	1-2,2580-2579;4-12,2577-2569;15-21,2566-2560	3-3,2578-2578[SIL];13-14,2568-2567[SIL];22-22,2559-2559[UP3]	.(((((((..(((((((((.((&)).)))))))))..))))))).	UGGUGAAGGAGGCAAGAAUGCU&AGGAUUCUUGUUAACUUUGCUU	2	53.6509	2	0.999948	Output/S24h/cleaveLand_result/t_plot/PC-3p-110122_70_XM_016110039.2_2571_TPlot.pdf	0	0	NA	NA	NA	53.6509	0	Inf	up	2.3929e-13	1.027e-12	yes	GO:0005488(binding);GO:0046872(metal ion binding);GO:0010556(regulation of macromolecule biosynthetic process);GO:1903506(regulation of nucleic acid-templated transcription);GO:0060255(regulation of macromolecule metabolic process);GO:0031323(regulation of cellular metabolic process);GO:0019219(regulation of nucleobase-containing compound metabolic process);GO:0031326(regulation of cellular biosy…	NA
PC-3p-110122_70	XM_016110194.2	800	821	812	-32.1	-22.48	0.700312	9	2-15,820-807;19-21,803-801	1-1,821-821[UP5];16-18,806-804[SIL];22-22,800-800[UP3]	.(((...((((((((((((((.&.))))))))))))))...))).	UGGUUAUGUUGGCAAGAGUCCA&AGGAUUCUUGUUAACUUUGCUU	1	26.8255	4	0.999896	Output/S24h/cleaveLand_result/t_plot/PC-3p-110122_70_XM_016110194.2_812_TPlot.pdf	0	0	NA	NA	NA	26.8255	0	Inf	up	2.2264e-07	2.57434e-07	yes	GO:0016020(membrane);GO:0031224(intrinsic component of membrane);GO:0044425(membrane part);GO:0016021(integral component of membrane)	NA
PC-3p-110122_70	XM_016111434.2	778	806	797	-32.1	-22.8	0.71028	18	2-4,805-803;6-12,801-795;13-22,787-778	1-1,806-806[UP5];5-5,802-802[SIL];x-x,794-788[BULt]	((((((((((.......(((((((.(((.&.))).)))))))-------))))))))))	AAGCAAAGUUGGCUGAGGACAAGAUUCCA&AGGAUUCUUGUU-------AACUUUGCUU	1	26.8255	4	0.999111	Output/S24h/cleaveLand_result/t_plot/PC-3p-110122_70_XM_016111434.2_797_TPlot.pdf	1	33.3045	4	0.997299	Output/S8h/cleaveLand_result/t_plot/PC-3p-110122_70_XM_016111434.2_797_TPlot.pdf	26.8255	33.3045	-0.312112	down	0.40341	0.405116	yes	GO:0034641(cellular nitrogen compound metabolic process);GO:0097159(organic cyclic compound binding);GO:0043229(intracellular organelle);GO:0031428(box C/D snoRNP complex);GO:0044422(organelle part);GO:0044260(cellular macromolecule metabolic process);GO:0044452(nucleolar part);GO:0030515(snoRNA binding);GO:0005732(small nucleolar ribonucleoprotein complex);GO:0034660(ncRNA metabolic process);GO:…	ko03008(Ribosome biogenesis in eukaryotes)
PC-3p-110122_70	XM_016111589.2	857	878	870	-32.1	-21.2	0.660436	8.5	1-3,878-876;5-9,875-871;11-14,869-866;15-22,864-857	4-4,x-x[BULq];10-10,870-870[SIL];x-x,865-865[BULt]	((((((((.((((.(((((-(((&))).))))).))))-))))))))	GAGCAAAGUUUGAGGAGGA-CCU&AGGAUUCUUGUUAA-CUUUGCUU	2	53.6509	3	0.909529	Output/S24h/cleaveLand_result/t_plot/PC-3p-110122_70_XM_016111589.2_870_TPlot.pdf	0	0	NA	NA	NA	53.6509	0	Inf	up	2.3929e-13	1.027e-12	yes	GO:1901265(nucleoside phosphate binding);GO:0008152(metabolic process);GO:0016491(oxidoreductase activity);GO:0036094(small molecule binding);GO:0005488(binding);GO:0003824(catalytic activity);GO:0097159(organic cyclic compound binding);GO:0048037(cofactor binding);GO:0055114(oxidation-reduction process);GO:0000166(nucleotide binding);GO:0016614(oxidoreductase activity, acting on CH-OH group of d…	ko01200(Carbon metabolism);ko00630(Glyoxylate and dicarboxylate metabolism);ko01100(Metabolic pathways)
PC-3p-110122_70	XM_016111590.2	955	976	968	-32.1	-21.2	0.660436	8.5	1-3,976-974;5-9,973-969;11-14,967-964;15-22,962-955	4-4,x-x[BULq];10-10,968-968[SIL];x-x,963-963[BULt]	((((((((.((((.(((((-(((&))).))))).))))-))))))))	GAGCAAAGUUUGAGGAGGA-CCU&AGGAUUCUUGUUAA-CUUUGCUU	3	80.4764	3	0.906527	Output/S24h/cleaveLand_result/t_plot/PC-3p-110122_70_XM_016111590.2_968_TPlot.pdf	1	33.3045	4	1	Output/S8h/cleaveLand_result/t_plot/PC-3p-110122_70_XM_016111590.2_968_TPlot.pdf	80.4764	33.3045	1.27285	up	9.7594e-06	1.11208e-05	yes	GO:1901265(nucleoside phosphate binding);GO:0008152(metabolic process);GO:0016491(oxidoreductase activity);GO:0036094(small molecule binding);GO:0005488(binding);GO:0003824(catalytic activity);GO:0097159(organic cyclic compound binding);GO:0048037(cofactor binding);GO:0055114(oxidation-reduction process);GO:0000166(nucleotide binding);GO:0016614(oxidoreductase activity, acting on CH-OH group of d…	ko01200(Carbon metabolism);ko00630(Glyoxylate and dicarboxylate metabolism);ko01100(Metabolic pathways)
PC-3p-110122_70	XM_016111734.2	3180	3201	3192	-32.1	-28.6	0.890966	4	1-12,3201-3190;15-22,3187-3180	13-14,3189-3188[SIL]	((((((((..((((((((((((&))))))))))))..))))))))	GGGCAAAGGCAGCAAGAAUCCU&AGGAUUCUUGUUAACUUUGCUU	0	0	NA	NA	NA	1	33.3045	4	0.0815735	Output/S8h/cleaveLand_result/t_plot/PC-3p-110122_70_XM_016111734.2_3192_TPlot.pdf	0	33.3045	-Inf	down	7.8779e-09	1.51467e-08	yes	GO:0005622(intracellular);GO:0007154(cell communication);GO:0044464(cell part);GO:0051345(positive regulation of hydrolase activity);GO:0043085(positive regulation of catalytic activity);GO:0050896(response to stimulus);GO:0065007(biological regulation);GO:0050794(regulation of cellular process);GO:0005623(cell);GO:0007264(small GTPase mediated signal transduction);GO:0065009(regulation of molecu…	NA
PC-3p-110122_70	XM_016112239.1	1752	1774	1764	-32.1	-22.5	0.700935	8	1-8,1774-1767;9-21,1765-1753	x-x,1766-1766[BULt];22-22,1752-1752[UP3]	.(((((((((((((.((((((((&))))))))-))))))))))))).	CAGUGAAGUUGACAGGGGAUCUU&AGGAUUCU-UGUUAACUUUGCUU	1	26.8255	4	0.999848	Output/S24h/cleaveLand_result/t_plot/PC-3p-110122_70_XM_016112239.1_1764_TPlot.pdf	0	0	NA	NA	NA	26.8255	0	Inf	up	2.2264e-07	2.57434e-07	yes	GO:0042651(thylakoid membrane);GO:0016020(membrane);GO:0042221(response to chemical);GO:0044436(thylakoid part);GO:0006950(response to stress);GO:0000304(response to singlet oxygen);GO:0005623(cell);GO:0009579(thylakoid);GO:1901700(response to oxygen-containing compound);GO:0044464(cell part);GO:0050896(response to stimulus);GO:0044424(intracellular part);GO:0000302(response to reactive oxygen sp…	ko03018(RNA degradation)
PC-3p-110122_70	XM_016113004.2	504	527	518	-32.1	-22.2	0.691589	6	1-9,527-519;11-14,517-514;15-19,512-508;20-22,506-504	10-10,518-518[SIL];x-x,513-513[BULt];x-x,507-507[BULt]	(((.(((((.((((.(((((((((&))))))))).))))-)))))-)))	GAGUCAGAGAUUAAGAAGGAUCCU&AGGAUUCUUGUUAA-CUUUG-CUU	3	80.4764	2	0.977078	Output/S24h/cleaveLand_result/t_plot/PC-3p-110122_70_XM_016113004.2_518_TPlot.pdf	0	0	NA	NA	NA	80.4764	0	Inf	up	2.9371e-19	3.48128e-18	yes	GO:0005623(cell);GO:0044464(cell part);GO:0016020(membrane)	ko03060(Protein export)
PC-3p-110122_70	XM_016113208.2	307	328	319	-32.1	-26.4	0.82243	6	2-4,327-325;7-22,322-307	1-1,328-328[UP5];5-6,324-323[SIL]	((((((((((((((((..(((.&.)))..))))))))))))))))	GAGCAAGGUUAACAAGCCUCCG&AGGAUUCUUGUUAACUUUGCUU	4	107.302	2	0.182867	Output/S24h/cleaveLand_result/t_plot/PC-3p-110122_70_XM_016113208.2_319_TPlot.pdf	1	33.3045	4	0.386937	Output/S8h/cleaveLand_result/t_plot/PC-3p-110122_70_XM_016113208.2_319_TPlot.pdf	107.302	33.3045	1.68789	up	4.3577e-10	1.74528e-09	yes	GO:0009058(biosynthetic process);GO:0009987(cellular process);GO:0006518(peptide metabolic process);GO:0043603(cellular amide metabolic process);GO:0010467(gene expression);GO:1901564(organonitrogen compound metabolic process);GO:0043228(non-membrane-bounded organelle);GO:0030529(intracellular ribonucleoprotein complex);GO:0044237(cellular metabolic process);GO:0032991(macromolecular complex);GO:…	ko03010(Ribosome)
PC-3p-110122_70	XM_016115839.2	883	903	894	-32.1	-21.7	0.676012	9	2-9,902-895;11-12,893-892;15-22,890-883	1-1,903-903[UP5];10-10,894-894[SIL];13-14,891-891[AILq]	((((((((.-((.((((((((.&.)))))))).))..))))))))	AGGCGAAGG-AAGGGGAGUCCG&AGGAUUCUUGUUAACUUUGCUU	3	80.4764	2	0.996736	Output/S24h/cleaveLand_result/t_plot/PC-3p-110122_70_XM_016115839.2_894_TPlot.pdf	0	0	NA	NA	NA	80.4764	0	Inf	up	2.9371e-19	3.48128e-18	yes	NA	NA
PC-3p-110122_70	XM_016116924.2	2501	2522	2512	-32.1	-21.5	0.669782	7.5	1-6,2522-2517;7-13,2515-2509;15-22,2508-2501	x-x,2516-2516[BULt];14-14,x-x[BULq]	((((((((-(((((((.((((((&))))))-))))))).))))))))	GGGCAGAG-UAAUGAGAAGUCCU&AGGAUU-CUUGUUAACUUUGCUU	1	26.8255	4	1	Output/S24h/cleaveLand_result/t_plot/PC-3p-110122_70_XM_016116924.2_2512_TPlot.pdf	0	0	NA	NA	NA	26.8255	0	Inf	up	2.2264e-07	2.57434e-07	yes	NA	NA
PC-3p-110122_70	XM_016117788.2	452	474	465	-32.1	-23.9	0.744548	9	2-4,473-471;6-19,469-456;20-22,454-452	1-1,474-474[UP5];5-5,470-470[SIL];x-x,455-455[BULt]	(((.((((((((((((((.(((.&.))).))))))))))))))-)))	GAGACAGAGUUGGCGAGGCUCCA&AGGAUUCUUGUUAACUUUG-CUU	3	80.4764	2	0.558065	Output/S24h/cleaveLand_result/t_plot/PC-3p-110122_70_XM_016117788.2_465_TPlot.pdf	2	66.6089	3	0.172882	Output/S8h/cleaveLand_result/t_plot/PC-3p-110122_70_XM_016117788.2_465_TPlot.pdf	80.4764	66.6089	0.27285	up	0.25284	0.265574	yes	GO:0016020(membrane)	NA
PC-3p-110122_70	XM_021129999.1	2152	2171	2162	-32.1	-21.4	0.666667	7.5	2-16,2170-2156;19-21,2155-2153	1-1,2171-2171[UP5];17-18,x-x[BULq];22-22,2152-2152[UP3]	.(((--(((((((((((((((.&.)))))))))))))))..))).	UAGU--AGUUAACGGGGAUCCA&AGGAUUCUUGUUAACUUUGCUU	1	26.8255	4	1	Output/S24h/cleaveLand_result/t_plot/PC-3p-110122_70_XM_021129999.1_2162_TPlot.pdf	0	0	NA	NA	NA	26.8255	0	Inf	up	2.2264e-07	2.57434e-07	yes	NA	ko03013(RNA transport)
PC-3p-110122_70	XM_021131738.1	751	771	763	-32.1	-21.2	0.660436	8	2-9,770-763;11-21,762-752	1-1,771-771[UP5];10-10,x-x[BULq];22-22,751-751[UP3]	.(((((((((((-((((((((.&.)))))))).))))))))))).	UGGCAAGGUUAG-AAGGAUCUC&AGGAUUCUUGUUAACUUUGCUU	1	26.8255	4	1	Output/S24h/cleaveLand_result/t_plot/PC-3p-110122_70_XM_021131738.1_763_TPlot.pdf	0	0	NA	NA	NA	26.8255	0	Inf	up	2.2264e-07	2.57434e-07	yes	NA	NA
PC-3p-110122_70	XM_021131963.1	2152	2174	2164	-32.1	-22.7	0.707165	8.5	2-3,2173-2172;4-19,2170-2155	1-1,2174-2174[UP5];x-x,2171-2171[BULt];20-22,2154-2152[UP3]	...((((((((((((((((.((.&.))-))))))))))))))))...	UACCAGAGUUGGCAAGAAUGCCA&AGG-AUUCUUGUUAACUUUGCUU	0	0	NA	NA	NA	1	33.3045	4	0.998197	Output/S8h/cleaveLand_result/t_plot/PC-3p-110122_70_XM_021131963.1_2164_TPlot.pdf	0	33.3045	-Inf	down	7.8779e-09	1.51467e-08	yes	GO:0030522(intracellular receptor signaling pathway);GO:0060089(molecular transducer activity);GO:0065007(biological regulation);GO:0004872(receptor activity);GO:0003904(deoxyribodipyrimidine photo-lyase activity);GO:0071483(cellular response to blue light);GO:0071214(cellular response to abiotic stimulus);GO:0016830(carbon-carbon lyase activity);GO:0004871(signal transducer activity);GO:0009314(…	ko04712(Circadian rhythm - plant)
PC-3p-110122_70	XM_021132260.1	1327	1347	1339	-32.1	-22.8	0.71028	10.5	2-8,1346-1340;11-21,1338-1328	1-1,1347-1347[UP5];9-10,1339-1339[AILq];22-22,1327-1327[UP3]	.(((((((((((.-(((((((.&.)))))))..))))))))))).	UGGCGAGGUUGAG-GGAGUCCC&AGGAUUCUUGUUAACUUUGCUU	0	0	NA	NA	NA	1	33.3045	4	0.997411	Output/S8h/cleaveLand_result/t_plot/PC-3p-110122_70_XM_021132260.1_1339_TPlot.pdf	0	33.3045	-Inf	down	7.8779e-09	1.51467e-08	yes	GO:0003677(DNA binding);GO:0009987(cellular process);GO:0051301(cell division);GO:0097159(organic cyclic compound binding);GO:0003676(nucleic acid binding);GO:1901363(heterocyclic compound binding);GO:0005488(binding)	ko03040(Spliceosome)
PC-3p-110122_70	XM_021133746.1	549	568	559	-32.1	-21.7	0.676012	6.5	2-12,567-557;15-22,556-549	1-1,568-568[UP5];13-14,x-x[BULq]	((((((((--(((((((((((.&.)))))))))))..))))))))	AAGCAAGG--GGCAAGAAUUCA&AGGAUUCUUGUUAACUUUGCUU	1	26.8255	4	1	Output/S24h/cleaveLand_result/t_plot/PC-3p-110122_70_XM_021133746.1_559_TPlot.pdf	0	0	NA	NA	NA	26.8255	0	Inf	up	2.2264e-07	2.57434e-07	yes	GO:0006399(tRNA metabolic process);GO:0019239(deaminase activity);GO:0043229(intracellular organelle);GO:0034470(ncRNA processing);GO:0044464(cell part);GO:0006725(cellular aromatic compound metabolic process);GO:0006807(nitrogen compound metabolic process);GO:0008033(tRNA processing);GO:0009451(RNA modification);GO:0006400(tRNA modification);GO:0044238(primary metabolic process);GO:0043231(intra…	NA
PC-3p-110122_70	XM_021134920.1	564	587	578	-32.1	-21.2	0.660436	9.5	1-12,587-576;13-15,572-570;18-22,568-564	x-x,575-573[BULt];16-17,569-569[AILq]	(((((.-(((...((((((((((((&))))))))))))---)))..)))))	AGGCAU-GUUUGGAACAAGGAUCCU&AGGAUUCUUGUU---AACUUUGCUU	1	26.8255	4	1	Output/S24h/cleaveLand_result/t_plot/PC-3p-110122_70_XM_021134920.1_578_TPlot.pdf	0	0	NA	NA	NA	26.8255	0	Inf	up	2.2264e-07	2.57434e-07	yes	NA	ko04626(Plant-pathogen interaction)
PC-3p-110122_70	XM_021139641.1	459	480	471	-32.1	-26.6	0.82866	7.5	1-1,480-480;3-22,478-459	2-2,479-479[SIL]	((((((((((((((((((((.(&).))))))))))))))))))))	GAGCAGGGUUGGCAAGGAUUGU&AGGAUUCUUGUUAACUUUGCUU	0	0	NA	NA	NA	1	33.3045	4	0.346535	Output/S8h/cleaveLand_result/t_plot/PC-3p-110122_70_XM_021139641.1_471_TPlot.pdf	0	33.3045	-Inf	down	7.8779e-09	1.51467e-08	yes	GO:0034641(cellular nitrogen compound metabolic process);GO:0009058(biosynthetic process);GO:0010467(gene expression);GO:0006412(translation);GO:0044425(membrane part);GO:0051234(establishment of localization);GO:0006807(nitrogen compound metabolic process);GO:0006810(transport);GO:0006518(peptide metabolic process);GO:0044238(primary metabolic process);GO:0071704(organic substance metabolic proc…	NA
PC-3p-110122_70	XM_021139784.1	667	690	679	-32.1	-26	0.809969	6.5	1-3,690-688;4-21,685-668	x-x,687-686[BULt];22-22,667-667[UP3]	.((((((((((((((((((..(((&)))--)))))))))))))))))).	CGGCGAGGUUAACAAGAAUGACCU&AGG--AUUCUUGUUAACUUUGCUU	1	26.8255	4	0.51945	Output/S24h/cleaveLand_result/t_plot/PC-3p-110122_70_XM_021139784.1_679_TPlot.pdf	2	66.6089	2	0.189935	Output/S8h/cleaveLand_result/t_plot/PC-3p-110122_70_XM_021139784.1_679_TPlot.pdf	26.8255	66.6089	-1.31211	down	3.8576e-05	4.31118e-05	yes	GO:0043492(ATPase activity, coupled to movement of substances);GO:0043229(intracellular organelle);GO:0051234(establishment of localization);GO:0017111(nucleoside-triphosphatase activity);GO:0042623(ATPase activity, coupled);GO:0043231(intracellular membrane-bounded organelle);GO:0044422(organelle part);GO:0098805(whole membrane);GO:0044437(vacuolar part);GO:0044464(cell part);GO:0005773(vacuole)…	ko04145(Phagosome);ko01100(Metabolic pathways);ko00190(Oxidative phosphorylation)
PC-3p-110122_70	XM_021141082.1	821	843	833	-32.1	-22.3	0.694704	9.5	2-2,842-842;5-22,838-821	1-1,843-843[UP5];3-4,841-839[AILt]	((((((((((((((((((...(.&.)-..))))))))))))))))))	GAGUGAAGUUGACAAGAAGCACA&AG-GAUUCUUGUUAACUUUGCUU	1	26.8255	4	0.99997	Output/S24h/cleaveLand_result/t_plot/PC-3p-110122_70_XM_021141082.1_833_TPlot.pdf	1	33.3045	4	0.999844	Output/S8h/cleaveLand_result/t_plot/PC-3p-110122_70_XM_021141082.1_833_TPlot.pdf	26.8255	33.3045	-0.312112	down	0.40341	0.405116	yes	GO:0043933(macromolecular complex subunit organization);GO:0044464(cell part);GO:0006461(protein complex assembly);GO:0022607(cellular component assembly);GO:0009987(cellular process);GO:0005829(cytosol);GO:0071840(cellular component organization or biogenesis);GO:0044424(intracellular part);GO:0005622(intracellular);GO:0044085(cellular component biogenesis);GO:0034622(cellular macromolecular com…	NA
PC-3p-110122_70	XM_021141084.1	821	843	833	-32.1	-22.3	0.694704	9.5	2-2,842-842;5-22,838-821	1-1,843-843[UP5];3-4,841-839[AILt]	((((((((((((((((((...(.&.)-..))))))))))))))))))	GAGUGAAGUUGACAAGAAGCACA&AG-GAUUCUUGUUAACUUUGCUU	0	0	NA	NA	NA	1	33.3045	4	0.99983	Output/S8h/cleaveLand_result/t_plot/PC-3p-110122_70_XM_021141084.1_833_TPlot.pdf	0	33.3045	-Inf	down	7.8779e-09	1.51467e-08	yes	GO:0043933(macromolecular complex subunit organization);GO:0044464(cell part);GO:0006461(protein complex assembly);GO:0022607(cellular component assembly);GO:0009987(cellular process);GO:0005829(cytosol);GO:0071840(cellular component organization or biogenesis);GO:0044424(intracellular part);GO:0005622(intracellular);GO:0044085(cellular component biogenesis);GO:0034622(cellular macromolecular com…	NA
PC-3p-110122_70	XM_021142149.1	446	470	462	-32.1	-21.8	0.679128	8	1-3,470-468;5-14,467-458;15-22,453-446	4-4,x-x[BULq];x-x,457-454[BULt]	((((((((....((((((((((-(((&))).))))))))))----))))))))	GAGCAAGGGAAUUUAGCAAGAA-CCU&AGGAUUCUUGUUAA----CUUUGCUU	2	53.6509	2	0.994938	Output/S24h/cleaveLand_result/t_plot/PC-3p-110122_70_XM_021142149.1_462_TPlot.pdf	0	0	NA	NA	NA	53.6509	0	Inf	up	2.3929e-13	1.027e-12	yes	GO:0043227(membrane-bounded organelle);GO:0043229(intracellular organelle);GO:0043226(organelle);GO:0016020(membrane);GO:0044464(cell part);GO:0043231(intracellular membrane-bounded organelle);GO:0044424(intracellular part);GO:0012505(endomembrane system);GO:0031224(intrinsic component of membrane);GO:0044444(cytoplasmic part);GO:0044425(membrane part);GO:0005737(cytoplasm);GO:0005794(Golgi appar…	ko00040(Pentose and glucuronate interconversions);ko01100(Metabolic pathways)
PC-3p-110122_70	XM_021142728.1	800	821	812	-32.1	-22.48	0.700312	9	2-15,820-807;19-21,803-801	1-1,821-821[UP5];16-18,806-804[SIL];22-22,800-800[UP3]	.(((...((((((((((((((.&.))))))))))))))...))).	UGGUUAUGUUGGCAAGAGUCCA&AGGAUUCUUGUUAACUUUGCUU	1	26.8255	4	0.999899	Output/S24h/cleaveLand_result/t_plot/PC-3p-110122_70_XM_021142728.1_812_TPlot.pdf	0	0	NA	NA	NA	26.8255	0	Inf	up	2.2264e-07	2.57434e-07	yes	GO:0016020(membrane);GO:0031224(intrinsic component of membrane);GO:0044425(membrane part);GO:0016021(integral component of membrane)	NA
PC-3p-110122_70	XM_021142729.1	800	821	812	-32.1	-22.48	0.700312	9	2-15,820-807;19-21,803-801	1-1,821-821[UP5];16-18,806-804[SIL];22-22,800-800[UP3]	.(((...((((((((((((((.&.))))))))))))))...))).	UGGUUAUGUUGGCAAGAGUCCA&AGGAUUCUUGUUAACUUUGCUU	2	53.6509	2	0.957987	Output/S24h/cleaveLand_result/t_plot/PC-3p-110122_70_XM_021142729.1_812_TPlot.pdf	1	33.3045	4	0.999538	Output/S8h/cleaveLand_result/t_plot/PC-3p-110122_70_XM_021142729.1_812_TPlot.pdf	53.6509	33.3045	0.687888	up	0.029111	0.0312173	yes	GO:0016020(membrane);GO:0031224(intrinsic component of membrane);GO:0044425(membrane part);GO:0016021(integral component of membrane)	NA
PC-3p-110421_70	XM_016086066.2	462	487	477	-39	-27.6	0.707692	10	4-9,484-479;10-10,477-477;11-24,475-462	1-3,487-485[UP5];x-x,478-478[BULt];x-x,476-476[BULt]	((((((((((((((.(.((((((...&...))))))-)-))))))))))))))	AGUCAUCAAAUUCAUGCUCGCUCAUU&UACGAGUGA-C-UGAAUUUGAUGACU	0	0	NA	NA	NA	1	33.3045	4	0.225301	Output/S8h/cleaveLand_result/t_plot/PC-3p-110421_70_XM_016086066.2_477_TPlot.pdf	0	33.3045	-Inf	down	7.8779e-09	1.51467e-08	yes	NA	NA
PC-3p-110421_70	XM_016086067.2	462	487	477	-39	-27.6	0.707692	10	4-9,484-479;10-10,477-477;11-24,475-462	1-3,487-485[UP5];x-x,478-478[BULt];x-x,476-476[BULt]	((((((((((((((.(.((((((...&...))))))-)-))))))))))))))	AGUCAUCAAAUUCAUGCUCGCUCAUU&UACGAGUGA-C-UGAAUUUGAUGACU	0	0	NA	NA	NA	2	66.6089	2	0.0767896	Output/S8h/cleaveLand_result/t_plot/PC-3p-110421_70_XM_016086067.2_477_TPlot.pdf	0	66.6089	-Inf	down	3.3071e-16	2.22267e-15	yes	NA	NA
PC-3p-110421_70	XM_016092291.2	809	837	828	-39	-25.8	0.661538	14	3-11,835-827;12-17,822-817;18-23,815-810	1-2,837-836[UP5];x-x,826-823[BULt];x-x,816-816[BULt];24-24,809-809[UP3]	.((((((.((((((....(((((((((..&..)))))))))----))))))-)))))).	CGUCAUCGAAAUUUGCAGAGUCACUCGGA&UACGAGUGACU----GAAUUU-GAUGACU	2	53.6509	2	0.217965	Output/S24h/cleaveLand_result/t_plot/PC-3p-110421_70_XM_016092291.2_828_TPlot.pdf	0	0	NA	NA	NA	53.6509	0	Inf	up	2.3929e-13	1.027e-12	yes	NA	NA
PC-3p-110421_70	XM_016104157.2	603	624	615	-39	-27.6	0.707692	4.5	1-17,624-608;20-24,607-603	18-19,x-x[BULq]	(((((--(((((((((((((((((&)))))))))))))))))..)))))	GGUCG--AAAUUCAGUCACUUGUG&UACGAGUGACUGAAUUUGAUGACU	3	80.4764	3	0.032112	Output/S24h/cleaveLand_result/t_plot/PC-3p-110421_70_XM_016104157.2_615_TPlot.pdf	0	0	NA	NA	NA	80.4764	0	Inf	up	2.9371e-19	3.48128e-18	yes	NA	NA
PC-3p-110421_70	XM_021134730.1	833	861	852	-39	-25.8	0.661538	14	3-11,859-851;12-17,846-841;18-23,839-834	1-2,861-860[UP5];x-x,850-847[BULt];x-x,840-840[BULt];24-24,833-833[UP3]	.((((((.((((((....(((((((((..&..)))))))))----))))))-)))))).	CGUCAUCGAAAUUUGCAGAGUCACUCGGA&UACGAGUGACU----GAAUUU-GAUGACU	1	26.8255	4	0.626756	Output/S24h/cleaveLand_result/t_plot/PC-3p-110421_70_XM_021134730.1_852_TPlot.pdf	0	0	NA	NA	NA	26.8255	0	Inf	up	2.2264e-07	2.57434e-07	yes	NA	NA
PC-3p-110449_70	BGI_novel_T006116	973	996	987	-37.9	-29.2	0.770449	5	1-13,996-984;15-24,982-973	14-14,983-983[SIL]	((((((((((.(((((((((((((&))))))))))))).))))))))))	GGUGUAAUUGUCUUUAUGUGAAGU&AUUUUACAUGAAGUCGAUUGCACC	0	0	NA	NA	NA	1	33.3045	4	0.590771	Output/S8h/cleaveLand_result/t_plot/PC-3p-110449_70_BGI_novel_T006116_987_TPlot.pdf	0	33.3045	-Inf	down	7.8779e-09	1.51467e-08	yes	GO:0008152(metabolic process)	NA
PC-3p-110449_70	XM_016091348.2	353	380	367	-37.9	-27.78	0.732982	12.5	1-7,380-374;9-23,368-354	8-8,373-369[AILt];24-24,353-353[UP3]	.(((((((((((((((.....(((((((&)))))))----.))))))))))))))).	CGUGCGAUCGACUUCACCGUCGUGAAAU&AUUUUAC----AUGAAGUCGAUUGCACC	0	0	NA	NA	NA	1	33.3045	4	0.732583	Output/S8h/cleaveLand_result/t_plot/PC-3p-110449_70_XM_016091348.2_367_TPlot.pdf	0	33.3045	-Inf	down	7.8779e-09	1.51467e-08	yes	NA	ko01110(Biosynthesis of secondary metabolites);ko00906(Carotenoid biosynthesis);ko01100(Metabolic pathways)
PC-3p-110449_70	XM_016107444.2	403	428	419	-37.9	-25.58	0.674934	12	1-4,428-425;7-15,422-414;18-24,409-403	5-6,424-423[SIL];16-17,413-410[AILt]	(((((((....(((((((((..((((&))))..)))))))))--..)))))))	GGUGCGAGGAGGGCUUCGUGGAGGAU&AUUUUACAUGAAGUC--GAUUGCACC	0	0	NA	NA	NA	1	33.3045	4	0.942192	Output/S8h/cleaveLand_result/t_plot/PC-3p-110449_70_XM_016107444.2_419_TPlot.pdf	0	33.3045	-Inf	down	7.8779e-09	1.51467e-08	yes	GO:0005515(protein binding);GO:0005488(binding);GO:0019904(protein domain specific binding)	NA
PC-3p-110449_70	XM_016107445.2	368	393	384	-37.9	-25.58	0.674934	12	1-4,393-390;7-15,387-379;18-24,374-368	5-6,389-388[SIL];16-17,378-375[AILt]	(((((((....(((((((((..((((&))))..)))))))))--..)))))))	GGUGCGAGGAGGGCUUCGUGGAGGAU&AUUUUACAUGAAGUC--GAUUGCACC	4	107.302	2	0.688955	Output/S24h/cleaveLand_result/t_plot/PC-3p-110449_70_XM_016107445.2_384_TPlot.pdf	0	0	NA	NA	NA	107.302	0	Inf	up	3.8116e-25	9.90703e-24	yes	GO:0005515(protein binding);GO:0005488(binding);GO:0019904(protein domain specific binding)	NA
PC-3p-110481_70	BGI_novel_T003273	2041	2064	2056	-42.3	-28.1	0.664303	7.5	2-8,2063-2057;10-16,2056-2050;17-23,2048-2042	1-1,2064-2064[UP5];9-9,x-x[BULq];x-x,2049-2049[BULt];24-24,2041-2041[UP3]	.(((((((.(((((((-(((((((.&.))))))).)))))))-))))))).	CUUCAGGUAGCAGAUG-UUUUGCGC&ACGUAAAAUCGUCUGC-ACCUGAGU	1	26.8255	4	0.64515	Output/S24h/cleaveLand_result/t_plot/PC-3p-110481_70_BGI_novel_T003273_2056_TPlot.pdf	0	0	NA	NA	NA	26.8255	0	Inf	up	2.2264e-07	2.57434e-07	yes	GO:0016043(cellular component organization);GO:0032502(developmental process);GO:0048856(anatomical structure development);GO:0048869(cellular developmental process);GO:0009987(cellular process);GO:0009653(anatomical structure morphogenesis);GO:0071840(cellular component organization or biogenesis);GO:0000902(cell morphogenesis);GO:0032989(cellular component morphogenesis)	ko03040(Spliceosome)
PC-3p-110481_70	XM_016076506.2	1467	1491	1482	-42.3	-27.8	0.65721	9	2-4,1490-1488;7-15,1485-1477;16-24,1475-1467	1-1,1491-1491[UP5];5-6,1487-1486[SIL];x-x,1476-1476[BULt]	(((((((((.(((((((((..(((.&.)))..)))))))))-)))))))))	GCUUAGGUGAUGGACGGUUGAACGA&ACGUAAAAUCGUCUG-CACCUGAGU	1	26.8255	4	0.731265	Output/S24h/cleaveLand_result/t_plot/PC-3p-110481_70_XM_016076506.2_1482_TPlot.pdf	0	0	NA	NA	NA	26.8255	0	Inf	up	2.2264e-07	2.57434e-07	yes	GO:0009057(macromolecule catabolic process);GO:0036211(protein modification process);GO:0032553(ribonucleotide binding);GO:0036094(small molecule binding);GO:0005737(cytoplasm);GO:0016740(transferase activity);GO:0008152(metabolic process);GO:0016874(ligase activity);GO:0044424(intracellular part);GO:0044238(primary metabolic process);GO:0030163(protein catabolic process);GO:0043226(organelle);GO…	ko04120(Ubiquitin mediated proteolysis)
PC-3p-110481_70	XM_016085373.2	3174	3197	3188	-42.3	-28	0.661939	15	8-24,3190-3174	1-7,3197-3191[UP5]	(((((((((((((((((.......&.......)))))))))))))))))	ACUUGGGUGCAGAUGAUGAGUUUG&ACGUAAAAUCGUCUGCACCUGAGU	1	26.8255	4	0.679265	Output/S24h/cleaveLand_result/t_plot/PC-3p-110481_70_XM_016085373.2_3188_TPlot.pdf	0	0	NA	NA	NA	26.8255	0	Inf	up	2.2264e-07	2.57434e-07	yes	NA	NA
PC-3p-110481_70	XM_016098458.2	1723	1746	1738	-42.3	-28.1	0.664303	7.5	2-8,1745-1739;10-16,1738-1732;17-23,1730-1724	1-1,1746-1746[UP5];9-9,x-x[BULq];x-x,1731-1731[BULt];24-24,1723-1723[UP3]	.(((((((.(((((((-(((((((.&.))))))).)))))))-))))))).	CUUCAGGUAGCAGAUG-UUUUGCGC&ACGUAAAAUCGUCUGC-ACCUGAGU	2	53.6509	2	0.308425	Output/S24h/cleaveLand_result/t_plot/PC-3p-110481_70_XM_016098458.2_1738_TPlot.pdf	3	99.9134	1	0.018062	Output/S8h/cleaveLand_result/t_plot/PC-3p-110481_70_XM_016098458.2_1738_TPlot.pdf	53.6509	99.9134	-0.897075	down	0.00018894	0.000209725	yes	GO:0016043(cellular component organization);GO:0032502(developmental process);GO:0048856(anatomical structure development);GO:0048869(cellular developmental process);GO:0009987(cellular process);GO:0009653(anatomical structure morphogenesis);GO:0071840(cellular component organization or biogenesis);GO:0000902(cell morphogenesis);GO:0032989(cellular component morphogenesis)	ko03040(Spliceosome)
PC-3p-110481_70	XM_016116985.2	1601	1624	1615	-42.3	-27.6	0.652482	17.5	10-24,1615-1601	1-9,1624-1616[UP5]	(((((((((((((((.........&.........)))))))))))))))	AUUCAGGUGCAGACGUUAAAGUAA&ACGUAAAAUCGUCUGCACCUGAGU	0	0	NA	NA	NA	2	66.6089	2	0.348543	Output/S8h/cleaveLand_result/t_plot/PC-3p-110481_70_XM_016116985.2_1615_TPlot.pdf	0	66.6089	-Inf	down	3.3071e-16	2.22267e-15	yes	GO:0004672(protein kinase activity);GO:0006793(phosphorus metabolic process);GO:1901265(nucleoside phosphate binding);GO:0006468(protein phosphorylation);GO:0018209(peptidyl-serine modification);GO:0005622(intracellular);GO:0051716(cellular response to stimulus);GO:0006796(phosphate-containing compound metabolic process);GO:0005623(cell);GO:0043168(anion binding);GO:0007154(cell communication);GO…	NA
PC-3p-113847_67	BGI_novel_T004791	625	649	640	-42.2	-33.2	0.78673	2	1-14,649-636;16-18,634-632;19-24,630-625	15-15,635-635[SIL];x-x,631-631[BULt]	((((((.(((.((((((((((((((&)))))))))))))).)))-))))))	AACUCAUGUGAAGUCGAUUUCACGU&ACGUGAAAUCGACUGCAC-UGAGUU	1	26.8255	4	0.411787	Output/S24h/cleaveLand_result/t_plot/PC-3p-113847_67_BGI_novel_T004791_640_TPlot.pdf	0	0	NA	NA	NA	26.8255	0	Inf	up	2.2264e-07	2.57434e-07	yes	NA	NA
PC-3p-113847_67	XM_016081231.2	473	497	488	-42.2	-30.7	0.727488	6.5	2-16,496-482;18-19,480-479;20-24,477-473	1-1,497-497[UP5];17-17,481-481[SIL];x-x,478-478[BULt]	(((((.((.(((((((((((((((.&.))))))))))))))).))-)))))	AGCUCGAGAGCAGUUGGUUUCGCGG&ACGUGAAAUCGACUGCACU-GAGUU	0	0	NA	NA	NA	3	99.9134	2	0.252139	Output/S8h/cleaveLand_result/t_plot/PC-3p-113847_67_XM_016081231.2_488_TPlot.pdf	0	99.9134	-Inf	down	1.5881e-23	2.78872e-22	yes	GO:0016740(transferase activity);GO:0016772(transferase activity, transferring phosphorus-containing groups);GO:0003824(catalytic activity);GO:0016779(nucleotidyltransferase activity)	ko03018(RNA degradation)
PC-3p-113847_67	XM_016090400.2	1171	1193	1184	-42.2	-28.1	0.665877	6.5	1-13,1193-1181;15-21,1180-1174	14-14,x-x[BULq];22-24,1173-1171[UP3]	...(((((((-(((((((((((((&))))))))))))).)))))))...	UGAUCGGUGC-GUUGAUUUCAUGU&ACGUGAAAUCGACUGCACUGAGUU	0	0	NA	NA	NA	1	33.3045	4	0.842886	Output/S8h/cleaveLand_result/t_plot/PC-3p-113847_67_XM_016090400.2_1184_TPlot.pdf	0	33.3045	-Inf	down	7.8779e-09	1.51467e-08	yes	GO:0043227(membrane-bounded organelle);GO:0009987(cellular process);GO:0043226(organelle);GO:0044238(primary metabolic process);GO:0043436(oxoacid metabolic process);GO:0005623(cell);GO:0008194(UDP-glycosyltransferase activity);GO:0019585(glucuronate metabolic process);GO:0044464(cell part);GO:0006063(uronic acid metabolic process);GO:0052695(cellular glucuronidation);GO:0006082(organic acid meta…	ko01110(Biosynthesis of secondary metabolites)
PC-3p-114045_66	BGI_novel_T008417	1701	1726	1715	-37.3	-25.3	0.678284	10.5	1-5,1726-1722;6-10,1719-1715;12-23,1713-1702	x-x,1721-1720[BULt];11-11,1714-1714[SIL];24-24,1701-1701[UP3]	.((((((((((((.(((((..(((((&)))))--))))).)))))))))))).	UGUUGGAGCUUGUGUUGUUGCGGCAU&AUGCU--AAUAAGACAAGUUCUGACU	0	0	NA	NA	NA	1	33.3045	4	0.654813	Output/S8h/cleaveLand_result/t_plot/PC-3p-114045_66_BGI_novel_T008417_1715_TPlot.pdf	0	33.3045	-Inf	down	7.8779e-09	1.51467e-08	yes	NA	ko03010(Ribosome)
PC-3p-114045_66	BGI_novel_T009885	625	650	640	-37.3	-24.9	0.66756	10	2-6,649-645;8-20,642-630;22-22,628-628;23-24,626-625	1-1,650-650[UP5];7-7,644-643[AILt];21-21,629-629[SIL];x-x,627-627[BULt]	((.(.(((((((((((((..(((((.&.)))))-.))))))))))))).)-))	GGCUGAGAGCUUGUCUUGGAUGGCAG&AUGCUA-AUAAGACAAGUUCUGA-CU	0	0	NA	NA	NA	2	66.6089	2	0.523302	Output/S8h/cleaveLand_result/t_plot/PC-3p-114045_66_BGI_novel_T009885_640_TPlot.pdf	0	66.6089	-Inf	down	3.3071e-16	2.22267e-15	yes	GO:0008152(metabolic process);GO:1901576(organic substance biosynthetic process);GO:0004315(3-oxoacyl-[acyl-carrier-protein] synthase activity);GO:0006631(fatty acid metabolic process);GO:0044281(small molecule metabolic process);GO:0044237(cellular metabolic process);GO:0016053(organic acid biosynthetic process);GO:0006082(organic acid metabolic process);GO:0016740(transferase activity);GO:00434…	ko01212(Fatty acid metabolism);ko00061(Fatty acid biosynthesis);ko01100(Metabolic pathways)
PC-3p-114045_66	BGI_novel_T011141	132	156	147	-37.3	-25	0.670241	8.5	1-4,156-153;6-8,151-149;10-22,147-135;23-24,133-132	5-5,152-152[SIL];9-9,148-148[SIL];x-x,134-134[BULt]	((.(((((((((((((.(((.((((&)))).))).)))))))))))))-))	GGCUCGGAGCUUGUCUCGUUCGCGU&AUGCUAAUAAGACAAGUUCUGA-CU	0	0	NA	NA	NA	1	33.3045	4	0.861713	Output/S8h/cleaveLand_result/t_plot/PC-3p-114045_66_BGI_novel_T011141_147_TPlot.pdf	0	33.3045	-Inf	down	7.8779e-09	1.51467e-08	yes	NA	NA
PC-3p-114614_66	XM_016083347.2	756	779	770	-37.3	-27.6	0.739946	9.5	4-6,776-774;8-24,772-756	1-3,779-777[UP5];7-7,773-773[SIL]	(((((((((((((((((.(((...&...))).)))))))))))))))))	GCUCUCGUGAUGAUGUUGUUAAUA&AUGUAAAGAUAUCAUCACGAGAGU	1	26.8255	4	0.0961385	Output/S24h/cleaveLand_result/t_plot/PC-3p-114614_66_XM_016083347.2_770_TPlot.pdf	3	99.9134	2	0.0286358	Output/S8h/cleaveLand_result/t_plot/PC-3p-114614_66_XM_016083347.2_770_TPlot.pdf	26.8255	99.9134	-1.89707	down	8.4486e-11	3.48434e-10	yes	GO:1901576(organic substance biosynthetic process);GO:0006497(protein lipidation);GO:0009987(cellular process);GO:0042158(lipoprotein biosynthetic process);GO:0009058(biosynthetic process);GO:0044260(cellular macromolecule metabolic process);GO:1901566(organonitrogen compound biosynthetic process);GO:0008152(metabolic process);GO:0043412(macromolecule modification);GO:0034645(cellular macromolecu…	NA
PC-3p-114614_66	XM_016114267.2	973	996	987	-37.3	-25.2	0.675603	8.5	3-5,994-992;8-17,989-980;19-24,978-973	1-2,996-995[UP5];6-7,991-990[SIL];18-18,979-979[SIL]	((((((.((((((((((..(((..&..)))..)))))))))).))))))	GCUCUCAUGAUGAUAUCACUACUC&AUGUAAAGAUAUCAUCACGAGAGU	1	26.8255	4	0.607407	Output/S24h/cleaveLand_result/t_plot/PC-3p-114614_66_XM_016114267.2_987_TPlot.pdf	0	0	NA	NA	NA	26.8255	0	Inf	up	2.2264e-07	2.57434e-07	yes	NA	NA
PC-3p-114614_66	XM_021125110.1	1630	1653	1644	-37.3	-25.4	0.680965	16	8-18,1646-1636;20-24,1634-1630	1-7,1653-1647[UP5];19-19,1635-1635[SIL]	(((((.(((((((((((.......&.......))))))))))).)))))	ACUCUGGUGAUGGUGUCACUCAUG&AUGUAAAGAUAUCAUCACGAGAGU	0	0	NA	NA	NA	1	33.3045	4	0.412473	Output/S8h/cleaveLand_result/t_plot/PC-3p-114614_66_XM_021125110.1_1644_TPlot.pdf	0	33.3045	-Inf	down	7.8779e-09	1.51467e-08	yes	GO:0097367(carbohydrate derivative binding);GO:0044464(cell part);GO:0050789(regulation of biological process);GO:0051130(positive regulation of cellular component organization);GO:0036094(small molecule binding);GO:0044430(cytoskeletal part);GO:0030029(actin filament-based process);GO:0044089(positive regulation of cellular component biogenesis);GO:0043228(non-membrane-bounded organelle);GO:0033…	NA
PC-3p-114792_66	BGI_novel_T001155	2986	3011	3003	-48.5	-32.9	0.678351	9	1-9,3011-3003;12-15,3001-2998;16-19,2994-2991;21-24,2989-2986	10-11,3002-3002[AILq];x-x,2997-2995[BULt];20-20,2990-2990[SIL]	((((.((((...((((.-(((((((((&)))))))))..))))---)))).))))	GGUGGGGUCUUCGACUG-GGGUGAAGU&ACUUCACCUGAAGUC---GACCGCACC	1	26.8255	4	0.51945	Output/S24h/cleaveLand_result/t_plot/PC-3p-114792_66_BGI_novel_T001155_3003_TPlot.pdf	0	0	NA	NA	NA	26.8255	0	Inf	up	2.2264e-07	2.57434e-07	yes	NA	ko03010(Ribosome)
PC-3p-114792_66	BGI_novel_T001355	264	291	282	-48.5	-32.9	0.678351	10.5	2-4,290-288;7-14,285-278;15-18,274-271;19-24,269-264	1-1,291-291[UP5];5-6,287-286[SIL];x-x,277-275[BULt];x-x,270-270[BULt]	((((((.((((...((((((((..(((.&.)))..))))))))---))))-))))))	GGUGCGAGUCGGAAGCUUCAGGGAGAGA&ACUUCACCUGAAGU---CGAC-CGCACC	1	26.8255	4	0.543133	Output/S24h/cleaveLand_result/t_plot/PC-3p-114792_66_BGI_novel_T001355_282_TPlot.pdf	0	0	NA	NA	NA	26.8255	0	Inf	up	2.2264e-07	2.57434e-07	yes	GO:2000112(regulation of cellular macromolecule biosynthetic process);GO:0044464(cell part);GO:0051246(regulation of protein metabolic process);GO:0044248(cellular catabolic process);GO:0043228(non-membrane-bounded organelle);GO:0005737(cytoplasm);GO:0019439(aromatic compound catabolic process);GO:0006139(nucleobase-containing compound metabolic process);GO:0043170(macromolecule metabolic process…	ko03018(RNA degradation)
PC-3p-114792_66	BGI_novel_T002926	2070	2096	2085	-48.5	-32.8	0.676289	8.5	1-5,2096-2092;6-9,2090-2087;11-21,2084-2074;22-24,2072-2070	x-x,2091-2091[BULt];10-10,2086-2085[AILt];x-x,2073-2073[BULt]	(((.(((((((((((..((((.(((((&)))))-))))-.)))))))))))-)))	GGUGGCGGUCGAUUUGGAGGUAGGAGU&ACUUC-ACCU-GAAGUCGACCGC-ACC	0	0	NA	NA	NA	2	66.6089	2	0.218826	Output/S8h/cleaveLand_result/t_plot/PC-3p-114792_66_BGI_novel_T002926_2085_TPlot.pdf	0	66.6089	-Inf	down	3.3071e-16	2.22267e-15	yes	GO:1901265(nucleoside phosphate binding);GO:0097159(organic cyclic compound binding);GO:1901363(heterocyclic compound binding);GO:0005488(binding);GO:0000166(nucleotide binding);GO:0036094(small molecule binding);GO:0003676(nucleic acid binding)	NA
PC-3p-114792_66	BGI_novel_T002927	2067	2093	2082	-48.5	-32.8	0.676289	8.5	1-5,2093-2089;6-9,2087-2084;11-21,2081-2071;22-24,2069-2067	x-x,2088-2088[BULt];10-10,2083-2082[AILt];x-x,2070-2070[BULt]	(((.(((((((((((..((((.(((((&)))))-))))-.)))))))))))-)))	GGUGGCGGUCGAUUUGGAGGUAGGAGU&ACUUC-ACCU-GAAGUCGACCGC-ACC	1	26.8255	4	0.617204	Output/S24h/cleaveLand_result/t_plot/PC-3p-114792_66_BGI_novel_T002927_2082_TPlot.pdf	0	0	NA	NA	NA	26.8255	0	Inf	up	2.2264e-07	2.57434e-07	yes	GO:1901265(nucleoside phosphate binding);GO:0097159(organic cyclic compound binding);GO:1901363(heterocyclic compound binding);GO:0005488(binding);GO:0000166(nucleotide binding);GO:0036094(small molecule binding);GO:0003676(nucleic acid binding)	NA
PC-3p-114792_66	XM_016085238.2	963	990	980	-48.5	-31.8	0.65567	8.5	1-2,990-989;4-8,987-983;9-18,981-972;19-21,970-968;22-24,965-963	3-3,988-988[SIL];x-x,982-982[BULt];x-x,971-971[BULt];x-x,967-966[BULt]	(((..(((.((((((((((.(((((.((&)).)))))-))))))))))-)))--)))	GGUUCGCGCGUCGGCUUCGUGGUGACGU&ACUUCACC-UGAAGUCGAC-CGC--ACC	0	0	NA	NA	NA	1	33.3045	4	0.732583	Output/S8h/cleaveLand_result/t_plot/PC-3p-114792_66_XM_016085238.2_980_TPlot.pdf	0	33.3045	-Inf	down	7.8779e-09	1.51467e-08	yes	NA	NA
PC-3p-114792_66	XM_016089737.2	1607	1637	1622	-48.5	-34.5	0.71134	15	1-7,1637-1631;8-22,1624-1610;23-24,1608-1607	x-x,1630-1625[BULt];x-x,1609-1609[BULt]	((.(((((((((((((((......(((((((&)))))))------)))))))))))))))-))	GGUUGUGGUUGACUUCAGUCAUUUGUGAGGU&ACUUCAC------CUGAAGUCGACCGCA-CC	2	53.6509	2	0.107874	Output/S24h/cleaveLand_result/t_plot/PC-3p-114792_66_XM_016089737.2_1622_TPlot.pdf	1	33.3045	4	0.241607	Output/S8h/cleaveLand_result/t_plot/PC-3p-114792_66_XM_016089737.2_1622_TPlot.pdf	53.6509	33.3045	0.687888	up	0.029111	0.0312173	yes	GO:0009059(macromolecule biosynthetic process);GO:0071704(organic substance metabolic process);GO:0009058(biosynthetic process);GO:0071840(cellular component organization or biogenesis);GO:0044264(cellular polysaccharide metabolic process);GO:0005976(polysaccharide metabolic process);GO:0071555(cell wall organization);GO:0009987(cellular process);GO:0044425(membrane part);GO:0071554(cell wall org…	NA
PC-3p-114792_66	XM_016097165.2	2070	2096	2085	-48.5	-32.8	0.676289	8.5	1-5,2096-2092;6-9,2090-2087;11-21,2084-2074;22-24,2072-2070	x-x,2091-2091[BULt];10-10,2086-2085[AILt];x-x,2073-2073[BULt]	(((.(((((((((((..((((.(((((&)))))-))))-.)))))))))))-)))	GGUGGCGGUCGAUUUGGAGGUAGGAGU&ACUUC-ACCU-GAAGUCGACCGC-ACC	1	26.8255	4	0.607407	Output/S24h/cleaveLand_result/t_plot/PC-3p-114792_66_XM_016097165.2_2085_TPlot.pdf	0	0	NA	NA	NA	26.8255	0	Inf	up	2.2264e-07	2.57434e-07	yes	GO:1901265(nucleoside phosphate binding);GO:0097159(organic cyclic compound binding);GO:1901363(heterocyclic compound binding);GO:0005488(binding);GO:0000166(nucleotide binding);GO:0036094(small molecule binding);GO:0003676(nucleic acid binding)	NA
PC-3p-114792_66	XM_016097166.2	2067	2093	2082	-48.5	-32.8	0.676289	8.5	1-5,2093-2089;6-9,2087-2084;11-21,2081-2071;22-24,2069-2067	x-x,2088-2088[BULt];10-10,2083-2082[AILt];x-x,2070-2070[BULt]	(((.(((((((((((..((((.(((((&)))))-))))-.)))))))))))-)))	GGUGGCGGUCGAUUUGGAGGUAGGAGU&ACUUC-ACCU-GAAGUCGACCGC-ACC	1	26.8255	4	0.626756	Output/S24h/cleaveLand_result/t_plot/PC-3p-114792_66_XM_016097166.2_2082_TPlot.pdf	0	0	NA	NA	NA	26.8255	0	Inf	up	2.2264e-07	2.57434e-07	yes	GO:1901265(nucleoside phosphate binding);GO:0097159(organic cyclic compound binding);GO:1901363(heterocyclic compound binding);GO:0005488(binding);GO:0000166(nucleotide binding);GO:0036094(small molecule binding);GO:0003676(nucleic acid binding)	NA
PC-3p-114792_66	XM_016097167.2	1935	1961	1950	-48.5	-32.8	0.676289	8.5	1-5,1961-1957;6-9,1955-1952;11-21,1949-1939;22-24,1937-1935	x-x,1956-1956[BULt];10-10,1951-1950[AILt];x-x,1938-1938[BULt]	(((.(((((((((((..((((.(((((&)))))-))))-.)))))))))))-)))	GGUGGCGGUCGAUUUGGAGGUAGGAGU&ACUUC-ACCU-GAAGUCGACCGC-ACC	1	26.8255	4	0.59736	Output/S24h/cleaveLand_result/t_plot/PC-3p-114792_66_XM_016097167.2_1950_TPlot.pdf	1	33.3045	4	0.535057	Output/S8h/cleaveLand_result/t_plot/PC-3p-114792_66_XM_016097167.2_1950_TPlot.pdf	26.8255	33.3045	-0.312112	down	0.40341	0.405116	yes	GO:1901265(nucleoside phosphate binding);GO:0097159(organic cyclic compound binding);GO:1901363(heterocyclic compound binding);GO:0005488(binding);GO:0000166(nucleotide binding);GO:0036094(small molecule binding);GO:0003676(nucleic acid binding)	NA
PC-3p-114792_66	XM_016098550.2	2550	2573	2565	-48.5	-32.5	0.670103	8	2-5,2572-2569;7-15,2568-2560;18-24,2556-2550	1-1,2573-2573[UP5];6-6,x-x[BULq];16-17,2559-2557[AILt]	(((((((...(((((((((-((((.&.)))).)))))))))-..)))))))	GGUGUGGCUAGGCUUCGGG-GAAGC&ACUUCACCUGAAGUC-GACCGCACC	0	0	NA	NA	NA	3	99.9134	2	0.262925	Output/S8h/cleaveLand_result/t_plot/PC-3p-114792_66_XM_016098550.2_2565_TPlot.pdf	0	99.9134	-Inf	down	1.5881e-23	2.78872e-22	yes	GO:0048731(system development);GO:0005576(extracellular region);GO:0071704(organic substance metabolic process);GO:0015977(carbon fixation);GO:0006101(citrate metabolic process);GO:0043227(membrane-bounded organelle);GO:0005623(cell);GO:0044281(small molecule metabolic process);GO:0005622(intracellular);GO:0009507(chloroplast);GO:0044464(cell part);GO:0016829(lyase activity);GO:0043231(intracellu…	ko01200(Carbon metabolism);ko01100(Metabolic pathways);ko00710(Carbon fixation in photosynthetic organisms);ko00620(Pyruvate metabolism)
PC-3p-114792_66	XM_021137498.1	2046	2072	2061	-48.5	-32.8	0.676289	8.5	1-5,2072-2068;6-9,2066-2063;11-21,2060-2050;22-24,2048-2046	x-x,2067-2067[BULt];10-10,2062-2061[AILt];x-x,2049-2049[BULt]	(((.(((((((((((..((((.(((((&)))))-))))-.)))))))))))-)))	GGUGGCGGUCGAUUUGGAGGUAGGAGU&ACUUC-ACCU-GAAGUCGACCGC-ACC	0	0	NA	NA	NA	1	33.3045	4	0.52506	Output/S8h/cleaveLand_result/t_plot/PC-3p-114792_66_XM_021137498.1_2061_TPlot.pdf	0	33.3045	-Inf	down	7.8779e-09	1.51467e-08	yes	GO:1901265(nucleoside phosphate binding);GO:0097159(organic cyclic compound binding);GO:1901363(heterocyclic compound binding);GO:0005488(binding);GO:0000166(nucleotide binding);GO:0036094(small molecule binding);GO:0003676(nucleic acid binding)	NA
PC-3p-115095_65	BGI_novel_T000483	1291	1318	1309	-39.4	-25.9	0.65736	14.5	4-13,1315-1306;16-22,1298-1292	1-3,1318-1316[UP5];14-15,1305-1299[AILt];23-23,1291-1291[UP3]	.(((((((.......((((((((((...&...))))))))))-----..))))))).	UGCACAAAGGCAAUGGGACCCUCUGUGA&AAUCGGAGGGUCC-----AAUUUGUGUU	1	26.8255	4	0.99966	Output/S24h/cleaveLand_result/t_plot/PC-3p-115095_65_BGI_novel_T000483_1309_TPlot.pdf	0	0	NA	NA	NA	26.8255	0	Inf	up	2.2264e-07	2.57434e-07	yes	GO:0016740(transferase activity);GO:0008152(metabolic process);GO:0044238(primary metabolic process);GO:1901360(organic cyclic compound metabolic process);GO:0009987(cellular process);GO:0043170(macromolecule metabolic process);GO:0097159(organic cyclic compound binding);GO:0044260(cellular macromolecule metabolic process);GO:0044237(cellular metabolic process);GO:0006725(cellular aromatic compou…	ko00240(Pyrimidine metabolism);ko03030(DNA replication);ko00230(Purine metabolism);ko01100(Metabolic pathways);ko03410(Base excision repair);ko03420(Nucleotide excision repair)
PC-3p-115095_65	BGI_novel_T000698	3287	3311	3301	-39.4	-25.8	0.654822	7	1-9,3311-3303;10-13,3301-3298;15-17,3296-3294;18-21,3292-3289	x-x,3302-3302[BULt];14-14,3297-3297[SIL];x-x,3293-3293[BULt];22-23,3288-3287[UP3]	..((((.(((.((((.(((((((((&)))))))))-)))).)))-))))..	ACCACGUGAUAGGACUCCUCCGAUU&AAUCGGAGG-GUCCAAUU-UGUGUU	0	0	NA	NA	NA	1	33.3045	4	0.99935	Output/S8h/cleaveLand_result/t_plot/PC-3p-115095_65_BGI_novel_T000698_3301_TPlot.pdf	0	33.3045	-Inf	down	7.8779e-09	1.51467e-08	yes	NA	NA
PC-3p-115095_65	BGI_novel_T002045	474	501	492	-39.4	-25.68	0.651777	14.5	3-13,499-489;17-20,480-477;22-23,475-474	1-2,501-500[UP5];14-16,488-481[AILt];21-21,476-476[SIL]	((.((((........(((((((((((..&..)))))))))))-----...)))).))	GAGGCAGUGACGACGGGGCCCUCCGAGC&AAUCGGAGGGUCC-----AAUUUGUGUU	0	0	NA	NA	NA	2	66.6089	2	0.926821	Output/S8h/cleaveLand_result/t_plot/PC-3p-115095_65_BGI_novel_T002045_492_TPlot.pdf	0	66.6089	-Inf	down	3.3071e-16	2.22267e-15	yes	GO:0055114(oxidation-reduction process);GO:0003824(catalytic activity);GO:0016491(oxidoreductase activity);GO:0008152(metabolic process)	ko00061(Fatty acid biosynthesis);ko00780(Biotin metabolism);ko01040(Biosynthesis of unsaturated fatty acids);ko01212(Fatty acid metabolism);ko01100(Metabolic pathways)
PC-3p-115095_65	BGI_novel_T008590	244	265	256	-39.4	-26.7	0.677665	5.5	1-14,265-252;16-17,251-250;19-20,248-247;22-23,245-244	15-15,x-x[BULq];18-18,249-249[SIL];21-21,246-246[SIL]	((.((.((-((((((((((((((&)))))))))))))).)).)).))	GAGGCCGA-UGGAUCCUCCGAUU&AAUCGGAGGGUCCAAUUUGUGUU	1	26.8255	4	0.969415	Output/S24h/cleaveLand_result/t_plot/PC-3p-115095_65_BGI_novel_T008590_256_TPlot.pdf	0	0	NA	NA	NA	26.8255	0	Inf	up	2.2264e-07	2.57434e-07	yes	GO:0016021(integral component of membrane);GO:0044425(membrane part);GO:0031224(intrinsic component of membrane);GO:0016020(membrane)	ko03030(DNA replication);ko03420(Nucleotide excision repair);ko03430(Mismatch repair);ko00511(Other glycan degradation)
PC-3p-115095_65	BGI_novel_T008592	244	265	256	-39.4	-26.7	0.677665	5.5	1-14,265-252;16-17,251-250;19-20,248-247;22-23,245-244	15-15,x-x[BULq];18-18,249-249[SIL];21-21,246-246[SIL]	((.((.((-((((((((((((((&)))))))))))))).)).)).))	GAGGCCGA-UGGAUCCUCCGAUU&AAUCGGAGGGUCCAAUUUGUGUU	1	26.8255	4	0.967829	Output/S24h/cleaveLand_result/t_plot/PC-3p-115095_65_BGI_novel_T008592_256_TPlot.pdf	0	0	NA	NA	NA	26.8255	0	Inf	up	2.2264e-07	2.57434e-07	yes	GO:0016021(integral component of membrane);GO:0044425(membrane part);GO:0031224(intrinsic component of membrane);GO:0016020(membrane)	ko03030(DNA replication);ko03420(Nucleotide excision repair);ko03430(Mismatch repair);ko00511(Other glycan degradation)
PC-3p-115095_65	XM_016086346.2	1533	1555	1546	-39.4	-26.6	0.675127	6.5	2-18,1554-1538;21-23,1535-1533	1-1,1555-1555[UP5];19-20,1537-1536[SIL]	(((..(((((((((((((((((.&.)))))))))))))))))..)))	GACCAAGGUUGGAUCCUUCGAUG&AAUCGGAGGGUCCAAUUUGUGUU	1	26.8255	4	0.975636	Output/S24h/cleaveLand_result/t_plot/PC-3p-115095_65_XM_016086346.2_1546_TPlot.pdf	3	99.9134	2	0.656212	Output/S8h/cleaveLand_result/t_plot/PC-3p-115095_65_XM_016086346.2_1546_TPlot.pdf	26.8255	99.9134	-1.89707	down	8.4486e-11	3.48434e-10	yes	GO:1901576(organic substance biosynthetic process);GO:0016053(organic acid biosynthetic process);GO:0009987(cellular process);GO:0008652(cellular amino acid biosynthetic process);GO:0016614(oxidoreductase activity, acting on CH-OH group of donors);GO:1901607(alpha-amino acid biosynthetic process);GO:0006520(cellular amino acid metabolic process);GO:0009069(serine family amino acid metabolic proce…	ko01230(Biosynthesis of amino acids);ko01100(Metabolic pathways);ko01200(Carbon metabolism);ko00260(Glycine, serine and threonine metabolism)
PC-3p-115095_65	XM_016095093.2	457	481	472	-39.4	-25.98	0.659391	11.5	4-13,478-469;16-22,464-458	1-3,481-479[UP5];14-15,468-465[AILt];23-23,457-457[UP3]	.(((((((....((((((((((...&...))))))))))--..))))))).	UACACAAGGGCAGGACCCUCUGUUU&AAUCGGAGGGUCC--AAUUUGUGUU	1	26.8255	4	0.999326	Output/S24h/cleaveLand_result/t_plot/PC-3p-115095_65_XM_016095093.2_472_TPlot.pdf	2	66.6089	3	0.44558	Output/S8h/cleaveLand_result/t_plot/PC-3p-115095_65_XM_016095093.2_472_TPlot.pdf	26.8255	66.6089	-1.31211	down	3.8576e-05	4.31118e-05	yes	GO:0019222(regulation of metabolic process);GO:0000079(regulation of cyclin-dependent protein serine/threonine kinase activity);GO:0050790(regulation of catalytic activity);GO:0051174(regulation of phosphorus metabolic process);GO:1904029(regulation of cyclin-dependent protein kinase activity);GO:0051171(regulation of nitrogen compound metabolic process);GO:0031399(regulation of protein modificat…	ko01110(Biosynthesis of secondary metabolites);ko00630(Glyoxylate and dicarboxylate metabolism);ko01200(Carbon metabolism);ko01210(2-Oxocarboxylic acid metabolism);ko01100(Metabolic pathways);ko01230(Biosynthesis of amino acids);ko00020(Citrate cycle (TCA cycle))
PC-3p-115095_65	XM_016099628.2	3356	3377	3368	-39.4	-27	0.685279	9.5	4-14,3374-3364;16-18,3363-3361;20-23,3359-3356	1-3,3377-3375[UP5];15-15,x-x[BULq];19-19,3360-3360[SIL]	((((.(((-(((((((((((...&...))))))))))).))).))))	GACAGAGG-UGGACCCUCUGGAG&AAUCGGAGGGUCCAAUUUGUGUU	0	0	NA	NA	NA	1	33.3045	4	0.918753	Output/S8h/cleaveLand_result/t_plot/PC-3p-115095_65_XM_016099628.2_3368_TPlot.pdf	0	33.3045	-Inf	down	7.8779e-09	1.51467e-08	yes	GO:0003723(RNA binding);GO:0097159(organic cyclic compound binding);GO:1901363(heterocyclic compound binding);GO:0005488(binding);GO:0003676(nucleic acid binding)	ko03013(RNA transport);ko03015(mRNA surveillance pathway)
PC-3p-115095_65	XM_016100746.2	234	256	247	-39.4	-28.7	0.728426	9	5-14,252-243;16-23,241-234	1-4,256-253[UP5];15-15,242-242[SIL]	((((((((.((((((((((....&....)))))))))).))))))))	AACACAAAAUGGAUCCUCCUCCU&AAUCGGAGGGUCCAAUUUGUGUU	1	26.8255	4	0.763162	Output/S24h/cleaveLand_result/t_plot/PC-3p-115095_65_XM_016100746.2_247_TPlot.pdf	0	0	NA	NA	NA	26.8255	0	Inf	up	2.2264e-07	2.57434e-07	yes	GO:1901564(organonitrogen compound metabolic process);GO:0003824(catalytic activity);GO:0019752(carboxylic acid metabolic process);GO:0009987(cellular process);GO:0006082(organic acid metabolic process);GO:0016740(transferase activity);GO:0044238(primary metabolic process);GO:0043436(oxoacid metabolic process);GO:0004084(branched-chain-amino-acid transaminase activity);GO:0016769(transferase acti…	ko00270(Cysteine and methionine metabolism);ko01110(Biosynthesis of secondary metabolites);ko00770(Pantothenate and CoA biosynthesis);ko01210(2-Oxocarboxylic acid metabolism);ko01100(Metabolic pathways);ko00280(Valine, leucine and isoleucine degradation);ko00290(Valine, leucine and isoleucine biosynthesis);ko01230(Biosynthesis of amino acids)
PC-3p-115095_65	XM_016101439.2	333	354	345	-39.4	-28.8	0.730964	7	1-13,354-342;17-21,339-335	14-16,341-340[AILq];22-23,334-333[UP3]	..(((((..-(((((((((((((&)))))))))))))...)))))..	GCCACGGCG-GGGCCCUCCGAUU&AAUCGGAGGGUCCAAUUUGUGUU	1	26.8255	4	0.737971	Output/S24h/cleaveLand_result/t_plot/PC-3p-115095_65_XM_016101439.2_345_TPlot.pdf	0	0	NA	NA	NA	26.8255	0	Inf	up	2.2264e-07	2.57434e-07	yes	GO:0008270(zinc ion binding);GO:0043167(ion binding);GO:0031224(intrinsic component of membrane);GO:0044425(membrane part);GO:0005488(binding);GO:0046872(metal ion binding);GO:0043169(cation binding);GO:0016021(integral component of membrane);GO:0016020(membrane);GO:0046914(transition metal ion binding)	ko04141(Protein processing in endoplasmic reticulum)
PC-3p-115095_65	XM_016106938.2	660	681	672	-39.4	-27.8	0.705584	8	3-19,679-663;21-23,662-660	1-2,681-680[UP5];20-20,x-x[BULq]	(((-(((((((((((((((((..&..))))))))))))))))).)))	GGC-CAAAUUGGACCCUUUGGCU&AAUCGGAGGGUCCAAUUUGUGUU	0	0	NA	NA	NA	3	99.9134	2	0.420019	Output/S8h/cleaveLand_result/t_plot/PC-3p-115095_65_XM_016106938.2_672_TPlot.pdf	0	99.9134	-Inf	down	1.5881e-23	2.78872e-22	yes	GO:0044464(cell part);GO:0072350(tricarboxylic acid metabolic process);GO:0045239(tricarboxylic acid cycle enzyme complex);GO:0036094(small molecule binding);GO:0016903(oxidoreductase activity, acting on the aldehyde or oxo group of donors);GO:0015980(energy derivation by oxidation of organic compounds);GO:0005488(binding);GO:0005737(cytoplasm);GO:0044281(small molecule metabolic process);GO:0016…	ko00380(Tryptophan metabolism);ko00310(Lysine degradation);ko01100(Metabolic pathways);ko00020(Citrate cycle (TCA cycle));ko01110(Biosynthesis of secondary metabolites);ko01200(Carbon metabolism)
PC-3p-115095_65	XM_016107163.2	1587	1609	1600	-39.4	-28.5	0.72335	9	3-13,1607-1597;15-20,1595-1590	1-2,1609-1608[UP5];14-14,1596-1596[SIL];21-23,1589-1587[UP3]	...((((((.(((((((((((..&..))))))))))).))))))...	AUGGCGAAUGGGACCCUCCGGGA&AAUCGGAGGGUCCAAUUUGUGUU	0	0	NA	NA	NA	2	66.6089	2	0.353258	Output/S8h/cleaveLand_result/t_plot/PC-3p-115095_65_XM_016107163.2_1600_TPlot.pdf	0	66.6089	-Inf	down	3.3071e-16	2.22267e-15	yes	NA	NA
PC-3p-115095_65	XM_016108308.2	308	332	322	-39.4	-25.9	0.65736	9.5	3-8,330-325;9-13,323-319;16-19,316-313;20-23,311-308	1-2,332-331[UP5];x-x,324-324[BULt];14-15,318-317[SIL];x-x,312-312[BULt]	((((.((((..(((((.((((((..&..))))))-)))))..))))-))))	GGCGUCAAAGAGGACCUCUCCGAGC&AAUCGGAG-GGUCCAAUUUG-UGUU	3	80.4764	2	0.922998	Output/S24h/cleaveLand_result/t_plot/PC-3p-115095_65_XM_016108308.2_322_TPlot.pdf	0	0	NA	NA	NA	80.4764	0	Inf	up	2.9371e-19	3.48128e-18	yes	NA	NA
PC-3p-115095_65	XM_016108330.2	1492	1516	1505	-39.4	-26.78	0.679695	14.5	3-5,1514-1512;8-22,1507-1493	1-2,1516-1515[UP5];6-7,1511-1508[AILt];23-23,1492-1492[UP3]	.(((((((((((((((....(((..&..)))--..))))))))))))))).	UGCACAGGUUGGGCCCCUAACGAGG&AAUCG--GAGGGUCCAAUUUGUGUU	0	0	NA	NA	NA	2	66.6089	2	0.619413	Output/S8h/cleaveLand_result/t_plot/PC-3p-115095_65_XM_016108330.2_1505_TPlot.pdf	0	66.6089	-Inf	down	3.3071e-16	2.22267e-15	yes	GO:0005975(carbohydrate metabolic process);GO:0016020(membrane);GO:0044425(membrane part);GO:0008152(metabolic process);GO:0016798(hydrolase activity, acting on glycosyl bonds);GO:0016787(hydrolase activity);GO:0016021(integral component of membrane);GO:0004553(hydrolase activity, hydrolyzing O-glycosyl compounds);GO:0044238(primary metabolic process);GO:0031224(intrinsic component of membrane);G…	NA
PC-3p-115095_65	XM_016108425.2	1002	1024	1015	-39.4	-25.7	0.652284	12.5	6-9,1019-1016;11-23,1014-1002	1-5,1024-1020[UP5];10-10,1015-1015[SIL]	(((((((((((((.((((.....&.....)))).)))))))))))))	GACACAAAUUGGAGUCUCGUAUG&AAUCGGAGGGUCCAAUUUGUGUU	1	26.8255	4	0.999873	Output/S24h/cleaveLand_result/t_plot/PC-3p-115095_65_XM_016108425.2_1015_TPlot.pdf	0	0	NA	NA	NA	26.8255	0	Inf	up	2.2264e-07	2.57434e-07	yes	GO:0008194(UDP-glycosyltransferase activity);GO:0016758(transferase activity, transferring hexosyl groups);GO:0042285(xylosyltransferase activity);GO:0044038(cell wall macromolecule biosynthetic process);GO:0005976(polysaccharide metabolic process);GO:0009059(macromolecule biosynthetic process);GO:0005975(carbohydrate metabolic process);GO:0016763(transferase activity, transferring pentosyl group…	NA
PC-3p-115095_65	XM_016108467.2	1158	1181	1172	-39.4	-26.1	0.662437	11	4-6,1178-1176;8-12,1174-1170;13-22,1168-1159	1-3,1181-1179[UP5];7-7,1175-1175[SIL];x-x,1169-1169[BULt];23-23,1158-1158[UP3]	.((((((((((.(((((.(((...&...))).)))))-)))))))))).	UACAUAAGUUGAGACCCCCCGGAU&AAUCGGAGGGUC-CAAUUUGUGUU	1	26.8255	4	0.997791	Output/S24h/cleaveLand_result/t_plot/PC-3p-115095_65_XM_016108467.2_1172_TPlot.pdf	0	0	NA	NA	NA	26.8255	0	Inf	up	2.2264e-07	2.57434e-07	yes	NA	ko04075(Plant hormone signal transduction);ko04933(AGE-RAGE signaling pathway in diabetic complications)
PC-3p-115095_65	XM_016109779.2	2850	2872	2863	-39.4	-26	0.659898	10	4-11,2869-2862;13-20,2860-2853	1-3,2872-2870[UP5];12-12,2861-2861[SIL];21-23,2852-2850[UP3]	...((((((((.((((((((...&...)))))))).))))))))...	AGAACAAAUUGAACCCUCCGGAU&AAUCGGAGGGUCCAAUUUGUGUU	1	26.8255	4	0.998965	Output/S24h/cleaveLand_result/t_plot/PC-3p-115095_65_XM_016109779.2_2863_TPlot.pdf	0	0	NA	NA	NA	26.8255	0	Inf	up	2.2264e-07	2.57434e-07	yes	GO:0032555(purine ribonucleotide binding);GO:0036094(small molecule binding);GO:0016817(hydrolase activity, acting on acid anhydrides);GO:0043168(anion binding);GO:0003824(catalytic activity);GO:0032559(adenyl ribonucleotide binding);GO:0016818(hydrolase activity, acting on acid anhydrides, in phosphorus-containing anhydrides);GO:0004386(helicase activity);GO:0097159(organic cyclic compound bindi…	ko03018(RNA degradation)
PC-3p-115095_65	XM_016113039.2	2378	2398	2389	-39.4	-25.7	0.652284	7	1-14,2398-2385;17-19,2383-2381;21-23,2380-2378	15-16,2384-2384[AILq];20-20,x-x[BULq]	(((-(((.-((((((((((((((&))))))))))))))..))).)))	GAC-CAGC-UGGGCCCUCUGGUU&AAUCGGAGGGUCCAAUUUGUGUU	2	53.6509	2	0.95493	Output/S24h/cleaveLand_result/t_plot/PC-3p-115095_65_XM_016113039.2_2389_TPlot.pdf	1	33.3045	4	0.999452	Output/S8h/cleaveLand_result/t_plot/PC-3p-115095_65_XM_016113039.2_2389_TPlot.pdf	53.6509	33.3045	0.687888	up	0.029111	0.0312173	yes	GO:0016788(hydrolase activity, acting on ester bonds);GO:1901363(heterocyclic compound binding);GO:0006725(cellular aromatic compound metabolic process);GO:0046914(transition metal ion binding);GO:0071704(organic substance metabolic process);GO:0005488(binding);GO:0044237(cellular metabolic process);GO:0090305(nucleic acid phosphodiester bond hydrolysis);GO:0006807(nitrogen compound metabolic pro…	ko04016(MAPK signaling pathway - plant)
PC-3p-115095_65	XM_021134214.1	1549	1571	1562	-39.4	-30.3	0.769036	10	5-17,1567-1555;19-22,1553-1550	1-4,1571-1568[UP5];18-18,1554-1554[SIL];23-23,1549-1549[UP3]	.((((.(((((((((((((....&....))))))))))))).)))).	UGCACCAGUUGGACCCUCCAAUG&AAUCGGAGGGUCCAAUUUGUGUU	1	26.8255	4	0.223298	Output/S24h/cleaveLand_result/t_plot/PC-3p-115095_65_XM_021134214.1_1562_TPlot.pdf	0	0	NA	NA	NA	26.8255	0	Inf	up	2.2264e-07	2.57434e-07	yes	GO:0044237(cellular metabolic process);GO:0009987(cellular process);GO:0006793(phosphorus metabolic process);GO:0016772(transferase activity, transferring phosphorus-containing groups);GO:0016301(kinase activity);GO:0016310(phosphorylation);GO:0008152(metabolic process);GO:0006796(phosphate-containing compound metabolic process);GO:0016740(transferase activity);GO:0003824(catalytic activity);GO:0…	NA
PC-3p-115095_65	XM_021138496.1	3172	3193	3184	-39.4	-27	0.685279	9.5	4-14,3190-3180;16-18,3179-3177;20-23,3175-3172	1-3,3193-3191[UP5];15-15,x-x[BULq];19-19,3176-3176[SIL]	((((.(((-(((((((((((...&...))))))))))).))).))))	GACAGAGG-UGGACCCUCUGGAG&AAUCGGAGGGUCCAAUUUGUGUU	0	0	NA	NA	NA	1	33.3045	4	0.913398	Output/S8h/cleaveLand_result/t_plot/PC-3p-115095_65_XM_021138496.1_3184_TPlot.pdf	0	33.3045	-Inf	down	7.8779e-09	1.51467e-08	yes	GO:0003723(RNA binding);GO:0097159(organic cyclic compound binding);GO:1901363(heterocyclic compound binding);GO:0005488(binding);GO:0003676(nucleic acid binding)	ko03013(RNA transport);ko03015(mRNA surveillance pathway)
PC-3p-115095_65	XM_021139246.1	333	354	345	-39.4	-28.8	0.730964	7	1-13,354-342;17-21,339-335	14-16,341-340[AILq];22-23,334-333[UP3]	..(((((..-(((((((((((((&)))))))))))))...)))))..	GCCACGGCG-GGGCCCUCCGAUU&AAUCGGAGGGUCCAAUUUGUGUU	0	0	NA	NA	NA	1	33.3045	4	0.669191	Output/S8h/cleaveLand_result/t_plot/PC-3p-115095_65_XM_021139246.1_345_TPlot.pdf	0	33.3045	-Inf	down	7.8779e-09	1.51467e-08	yes	GO:0008270(zinc ion binding);GO:0043167(ion binding);GO:0031224(intrinsic component of membrane);GO:0044425(membrane part);GO:0005488(binding);GO:0046872(metal ion binding);GO:0043169(cation binding);GO:0016021(integral component of membrane);GO:0016020(membrane);GO:0046914(transition metal ion binding)	ko04141(Protein processing in endoplasmic reticulum)
PC-3p-115095_65	XM_021141168.1	212	233	224	-39.4	-28.1	0.713198	9.5	5-19,229-215;21-23,214-212	1-4,233-230[UP5];20-20,x-x[BULq]	(((-(((((((((((((((....&....))))))))))))))).)))	GGC-UAAAUUGGACCCUCCAGUU&AAUCGGAGGGUCCAAUUUGUGUU	0	0	NA	NA	NA	2	66.6089	2	0.380838	Output/S8h/cleaveLand_result/t_plot/PC-3p-115095_65_XM_021141168.1_224_TPlot.pdf	0	66.6089	-Inf	down	3.3071e-16	2.22267e-15	yes	GO:0003824(catalytic activity);GO:0016747(transferase activity, transferring acyl groups other than amino-acyl groups);GO:0016746(transferase activity, transferring acyl groups);GO:0016740(transferase activity)	ko00330(Arginine and proline metabolism);ko00944(Flavone and flavonol biosynthesis);ko00943(Isoflavonoid biosynthesis)
PC-3p-115095_65	XM_021142094.1	317	341	331	-39.4	-25.9	0.65736	9.5	3-8,339-334;9-13,332-328;16-19,325-322;20-23,320-317	1-2,341-340[UP5];x-x,333-333[BULt];14-15,327-326[SIL];x-x,321-321[BULt]	((((.((((..(((((.((((((..&..))))))-)))))..))))-))))	GGCGUCAAAGAGGACCUCUCCGAGC&AAUCGGAG-GGUCCAAUUUG-UGUU	0	0	NA	NA	NA	1	33.3045	4	0.998744	Output/S8h/cleaveLand_result/t_plot/PC-3p-115095_65_XM_021142094.1_331_TPlot.pdf	0	33.3045	-Inf	down	7.8779e-09	1.51467e-08	yes	NA	NA
PC-3p-116071_65	XM_016077360.2	1331	1354	1345	-37.3	-25.2	0.675603	14.5	7-20,1348-1335;23-24,1332-1331	1-6,1354-1349[UP5];21-22,1334-1333[SIL]	((..((((((((((((((......&......))))))))))))))..))	AGAAUGAGAGGCCAGUGUCUUCCC&AUAAAAAUACUGGCCUCUUAGACU	2	53.6509	2	0.264585	Output/S24h/cleaveLand_result/t_plot/PC-3p-116071_65_XM_016077360.2_1345_TPlot.pdf	0	0	NA	NA	NA	53.6509	0	Inf	up	2.3929e-13	1.027e-12	yes	GO:0016020(membrane);GO:0044464(cell part);GO:0012505(endomembrane system);GO:0005623(cell)	NA
PC-3p-116071_65	XM_016111913.2	507	531	522	-37.3	-24.5	0.656836	8	2-13,530-519;14-22,517-509	1-1,531-531[UP5];x-x,518-518[BULt];23-24,508-507[UP3]	..(((((((((.((((((((((((.&.))))))))))))-)))))))))..	GUUCUGGGGGGAUCAGUGUUUUUGA&AUAAAAAUACUGG-CCUCUUAGACU	0	0	NA	NA	NA	2	66.6089	3	0.11706	Output/S8h/cleaveLand_result/t_plot/PC-3p-116071_65_XM_016111913.2_522_TPlot.pdf	0	66.6089	-Inf	down	3.3071e-16	2.22267e-15	yes	GO:0009058(biosynthetic process);GO:0005829(cytosol);GO:0002181(cytoplasmic translation);GO:0071704(organic substance metabolic process);GO:0044391(ribosomal subunit);GO:0044444(cytoplasmic part);GO:0044249(cellular biosynthetic process);GO:0044464(cell part);GO:0043232(intracellular non-membrane-bounded organelle);GO:0043604(amide biosynthetic process);GO:0043043(peptide biosynthetic process);GO…	ko03010(Ribosome)
PC-3p-117208_64	XM_016082953.2	1213	1238	1229	-39.9	-26.1	0.654135	9.5	1-6,1238-1233;9-15,1230-1224;16-24,1221-1213	7-8,1232-1231[SIL];x-x,1223-1222[BULt]	(((((((((..(((((((..((((((&))))))..)))))))--)))))))))	GUUGAUGGCGACGAGGGUGAUUGGAU&AUUUAACGACUCUCG--GCUAUCAAC	0	0	NA	NA	NA	1	33.3045	4	0.977329	Output/S8h/cleaveLand_result/t_plot/PC-3p-117208_64_XM_016082953.2_1229_TPlot.pdf	0	33.3045	-Inf	down	7.8779e-09	1.51467e-08	yes	GO:0016070(RNA metabolic process);GO:0032501(multicellular organismal process);GO:0044424(intracellular part);GO:0048229(gametophyte development);GO:0006139(nucleobase-containing compound metabolic process);GO:0010467(gene expression);GO:0034641(cellular nitrogen compound metabolic process);GO:0008152(metabolic process);GO:0006396(RNA processing);GO:1901360(organic cyclic compound metabolic proce…	ko03008(Ribosome biogenesis in eukaryotes)
PC-3p-117208_64	XM_016087891.2	1647	1670	1661	-39.9	-32.9	0.824561	2.5	1-16,1670-1655;18-24,1653-1647	17-17,1654-1654[SIL]	(((((((.((((((((((((((((&)))))))))))))))).)))))))	GUUGAUAUCUGAGAGUCGUUAGAU&AUUUAACGACUCUCGGCUAUCAAC	7	187.778	2	0.123404	Output/S24h/cleaveLand_result/t_plot/PC-3p-117208_64_XM_016087891.2_1661_TPlot.pdf	1	33.3045	4	0.273197	Output/S8h/cleaveLand_result/t_plot/PC-3p-117208_64_XM_016087891.2_1661_TPlot.pdf	187.778	33.3045	2.49524	up	2.7633e-25	9.34212e-24	yes	GO:0006807(nitrogen compound metabolic process);GO:0006508(proteolysis);GO:0044238(primary metabolic process);GO:0019538(protein metabolic process);GO:0030163(protein catabolic process);GO:1901564(organonitrogen compound metabolic process);GO:0008233(peptidase activity);GO:0003824(catalytic activity);GO:0004175(endopeptidase activity);GO:0070001(aspartic-type peptidase activity);GO:1901565(organo…	ko03010(Ribosome)
PC-3p-117208_64	XM_016100506.2	717	741	732	-39.9	-26.3	0.659148	16	7-14,735-728;15-21,726-720	1-6,741-736[UP5];x-x,727-727[BULt];22-24,719-717[UP3]	...(((((((.((((((((......&......))))))))-)))))))...	UUCGGUGGCCGGAGAGUCGGGACUC&AUUUAACGACUCUC-GGCUAUCAAC	0	0	NA	NA	NA	1	33.3045	4	0.940949	Output/S8h/cleaveLand_result/t_plot/PC-3p-117208_64_XM_016100506.2_732_TPlot.pdf	0	33.3045	-Inf	down	7.8779e-09	1.51467e-08	yes	GO:0016020(membrane);GO:0016021(integral component of membrane);GO:0016740(transferase activity);GO:0032259(methylation);GO:0008168(methyltransferase activity);GO:0044425(membrane part);GO:0008152(metabolic process);GO:0016741(transferase activity, transferring one-carbon groups);GO:0031224(intrinsic component of membrane);GO:0003824(catalytic activity)	NA
PC-3p-117208_64	XM_016102742.2	1314	1337	1328	-39.9	-27.4	0.686717	9.5	1-3,1337-1335;5-19,1333-1319	4-4,1334-1334[SIL];20-24,1318-1314[UP3]	.....(((((((((((((((.(((&))).))))))))))))))).....	CGUCUUGGCCGAGGGUCGUUUGAU&AUUUAACGACUCUCGGCUAUCAAC	6	160.953	3	0.233662	Output/S24h/cleaveLand_result/t_plot/PC-3p-117208_64_XM_016102742.2_1328_TPlot.pdf	6	199.827	2	0.536953	Output/S8h/cleaveLand_result/t_plot/PC-3p-117208_64_XM_016102742.2_1328_TPlot.pdf	160.953	199.827	-0.312112	down	0.040677	0.043603	yes	GO:0004013(adenosylhomocysteinase activity);GO:0034641(cellular nitrogen compound metabolic process);GO:0044281(small molecule metabolic process);GO:0044238(primary metabolic process);GO:0009116(nucleoside metabolic process);GO:0006534(cysteine metabolic process);GO:0071704(organic substance metabolic process);GO:0046128(purine ribonucleoside metabolic process);GO:0019752(carboxylic acid metaboli…	ko00270(Cysteine and methionine metabolism);ko01100(Metabolic pathways)
PC-3p-117208_64	XM_016112794.2	1982	2005	1996	-39.9	-26.8	0.671679	13.5	5-18,2001-1988	1-4,2005-2002[UP5];19-24,1987-1982[UP3]	......((((((((((((((....&....))))))))))))))......	AUUAAGGGCCGAGAGUCGUUCAUA&AUUUAACGACUCUCGGCUAUCAAC	1	26.8255	4	0.946672	Output/S24h/cleaveLand_result/t_plot/PC-3p-117208_64_XM_016112794.2_1996_TPlot.pdf	0	0	NA	NA	NA	26.8255	0	Inf	up	2.2264e-07	2.57434e-07	yes	GO:0016021(integral component of membrane);GO:0044425(membrane part);GO:0031224(intrinsic component of membrane);GO:0016020(membrane)	NA
PC-3p-117669_63	BGI_novel_T013996	602	626	617	-38.4	-26	0.677083	6.5	2-14,625-613;15-22,611-604	1-1,626-626[UP5];x-x,612-612[BULt];23-24,603-602[UP3]	..((((((((.(((((((((((((.&.)))))))))))))-))))))))..	CUUGAAGUUGCACUUCGUAUGAAGC&AUUUCAUAUGAAGU-CGACUUCACC	0	0	NA	NA	NA	1	33.3045	4	0.797193	Output/S8h/cleaveLand_result/t_plot/PC-3p-117669_63_BGI_novel_T013996_617_TPlot.pdf	0	33.3045	-Inf	down	7.8779e-09	1.51467e-08	yes	GO:0009987(cellular process)	ko03440(Homologous recombination)
PC-3p-117669_63	BGI_novel_T014163	500	523	515	-38.4	-28.3	0.736979	5.5	2-5,522-519;7-13,518-512;14-24,510-500	1-1,523-523[UP5];6-6,x-x[BULq];x-x,511-511[BULt]	(((((((((((.(((((((-((((.&.)))).)))))))-)))))))))))	GGUGGGGUCGGUCUUCAUA-GAAAA&AUUUCAUAUGAAG-UCGACUUCACC	2	53.6509	3	0.0841236	Output/S24h/cleaveLand_result/t_plot/PC-3p-117669_63_BGI_novel_T014163_515_TPlot.pdf	0	0	NA	NA	NA	53.6509	0	Inf	up	2.3929e-13	1.027e-12	yes	NA	ko01100(Metabolic pathways);ko00190(Oxidative phosphorylation)
PC-3p-117669_63	XM_016081484.2	1194	1219	1209	-38.4	-26.1	0.679688	11.5	3-5,1217-1215;6-9,1213-1210;11-14,1208-1205;15-24,1203-1194	1-2,1219-1218[UP5];x-x,1214-1214[BULt];10-10,1209-1209[SIL];x-x,1204-1204[BULt]	((((((((((.((((.((((.(((..&..)))-)))).))))-))))))))))	GGUGAGGUCGUACUUGGUGUCGGAUG&AUUUC-AUAUGAAGU-CGACUUCACC	4	107.302	2	0.47783	Output/S24h/cleaveLand_result/t_plot/PC-3p-117669_63_XM_016081484.2_1209_TPlot.pdf	0	0	NA	NA	NA	107.302	0	Inf	up	3.8116e-25	9.90703e-24	yes	GO:0016747(transferase activity, transferring acyl groups other than amino-acyl groups);GO:0003824(catalytic activity);GO:0016740(transferase activity);GO:0016746(transferase activity, transferring acyl groups)	NA
PC-3p-117669_63	XM_016096850.2	532	555	546	-38.4	-27.4	0.713542	9.5	3-10,553-546;13-24,543-532	1-2,555-554[UP5];11-12,545-544[SIL]	((((((((((((..((((((((..&..))))))))..))))))))))))	GGUGGGGUUGACAACAUAUGGAUU&AUUUCAUAUGAAGUCGACUUCACC	2	53.6509	3	0.146298	Output/S24h/cleaveLand_result/t_plot/PC-3p-117669_63_XM_016096850.2_546_TPlot.pdf	1	33.3045	4	0.738212	Output/S8h/cleaveLand_result/t_plot/PC-3p-117669_63_XM_016096850.2_546_TPlot.pdf	53.6509	33.3045	0.687888	up	0.029111	0.0312173	yes	GO:0008152(metabolic process);GO:0043414(macromolecule methylation);GO:1990259(histone-glutamine methyltransferase activity);GO:0034470(ncRNA processing);GO:0043628(ncRNA 3'-end processing);GO:0018364(peptidyl-glutamine methylation);GO:0031167(rRNA methylation);GO:0042054(histone methyltransferase activity);GO:0031974(membrane-enclosed lumen);GO:0019538(protein metabolic process);GO:0043144(snoRN…	ko03008(Ribosome biogenesis in eukaryotes)
PC-3p-117669_63	XM_021143533.1	525	548	539	-38.4	-27.7	0.721354	9.5	3-10,546-539;13-24,536-525	1-2,548-547[UP5];11-12,538-537[SIL]	((((((((((((..((((((((..&..))))))))..))))))))))))	GGUGGGGUUGACAACAUAUGGAUU&AUUUCAUAUGAAGUCGACUUCACC	1	26.8255	4	0.750884	Output/S24h/cleaveLand_result/t_plot/PC-3p-117669_63_XM_021143533.1_539_TPlot.pdf	1	33.3045	4	0.689644	Output/S8h/cleaveLand_result/t_plot/PC-3p-117669_63_XM_021143533.1_539_TPlot.pdf	26.8255	33.3045	-0.312112	down	0.40341	0.405116	yes	GO:0008033(tRNA processing);GO:0016072(rRNA metabolic process);GO:0000154(rRNA modification);GO:0031167(rRNA methylation);GO:1990259(histone-glutamine methyltransferase activity);GO:0044446(intracellular organelle part);GO:0031428(box C/D snoRNP complex);GO:0005634(nucleus);GO:0044085(cellular component biogenesis);GO:0006807(nitrogen compound metabolic process);GO:0016740(transferase activity);G…	ko03008(Ribosome biogenesis in eukaryotes)
PC-3p-117903_63	XM_016115252.2	772	795	786	-31.1	-24.1	0.77492	8.5	3-15,793-781;18-24,778-772	1-2,795-794[UP5];16-17,780-779[SIL]	(((((((..(((((((((((((..&..)))))))))))))..)))))))	GGUGUUCCUGUUGUUUUGGUCGAG&AACGAUUAAAAUAAUUAGAACACC	1	26.8255	4	0.0961385	Output/S24h/cleaveLand_result/t_plot/PC-3p-117903_63_XM_016115252.2_786_TPlot.pdf	0	0	NA	NA	NA	26.8255	0	Inf	up	2.2264e-07	2.57434e-07	yes	GO:1901265(nucleoside phosphate binding);GO:0098588(bounding membrane of organelle);GO:0005488(binding);GO:0043227(membrane-bounded organelle);GO:0022857(transmembrane transporter activity);GO:0044446(intracellular organelle part);GO:0009507(chloroplast);GO:0071702(organic substance transport);GO:0044422(organelle part);GO:0097367(carbohydrate derivative binding);GO:0005515(protein binding);GO:00…	NA
PC-3p-118336_63	XM_016111193.2	12249	12274	12265	-43	-31.7	0.737209	9.5	4-19,12271-12256;20-24,12253-12249	1-3,12274-12272[UP5];x-x,12255-12254[BULt]	(((((..((((((((((((((((...&...))))))))))))))))--)))))	GCUCAGUGGUGCAGUUGAUUUGACAU&AAAUCAAGUCGACUGCACC--UGAGU	0	0	NA	NA	NA	1	33.3045	4	0.332485	Output/S8h/cleaveLand_result/t_plot/PC-3p-118336_63_XM_016111193.2_12265_TPlot.pdf	0	33.3045	-Inf	down	7.8779e-09	1.51467e-08	yes	GO:0022618(ribonucleoprotein complex assembly);GO:0005524(ATP binding);GO:0005488(binding);GO:0022607(cellular component assembly);GO:0032559(adenyl ribonucleotide binding);GO:0016887(ATPase activity);GO:0005634(nucleus);GO:0032553(ribonucleotide binding);GO:0035639(purine ribonucleoside triphosphate binding);GO:0044085(cellular component biogenesis);GO:0036094(small molecule binding);GO:0071826(…	ko03008(Ribosome biogenesis in eukaryotes)
PC-3p-119396_62	BGI_novel_T009318	248	279	262	-37.9	-26.4	0.69657	21	1-7,279-273;8-21,264-251	x-x,272-265[BULt];22-24,250-248[UP3]	...((((((((((((((........(((((((&)))))))--------))))))))))))))...	GGAGGUUCAGUUUGGUUGUCGUCGCUGGGUUU&AAAUCCG--------AACCAAACUGAACCAAU	1	26.8255	4	0.757101	Output/S24h/cleaveLand_result/t_plot/PC-3p-119396_62_BGI_novel_T009318_262_TPlot.pdf	0	0	NA	NA	NA	26.8255	0	Inf	up	2.2264e-07	2.57434e-07	yes	NA	NA
PC-3p-119396_62	BGI_novel_T011434	421	441	433	-37.9	-24.7	0.651715	6	2-6,440-436;8-11,435-432;14-24,431-421	1-1,441-441[UP5];7-7,x-x[BULq];12-13,x-x[BULq]	(((((((((((--((((-(((((.&.))))).))))..)))))))))))	AUUGGUUCAGU--GGUU-GGAUUC&AAAUCCGAACCAAACUGAACCAAU	3	80.4764	2	0.788634	Output/S24h/cleaveLand_result/t_plot/PC-3p-119396_62_BGI_novel_T011434_433_TPlot.pdf	0	0	NA	NA	NA	80.4764	0	Inf	up	2.9371e-19	3.48128e-18	yes	GO:0003824(catalytic activity);GO:0016788(hydrolase activity, acting on ester bonds);GO:0016787(hydrolase activity);GO:0043167(ion binding);GO:0004722(protein serine/threonine phosphatase activity);GO:0005488(binding);GO:0004721(phosphoprotein phosphatase activity);GO:0016791(phosphatase activity);GO:0042578(phosphoric ester hydrolase activity);GO:0043169(cation binding);GO:0046872(metal ion bind…	NA
PC-3p-119396_62	XM_016077837.2	472	495	485	-37.9	-27	0.712401	7	2-8,494-488;10-18,485-477;20-24,476-472	1-1,495-495[UP5];9-9,487-486[AILt];19-19,x-x[BULq]	(((((-(((((((((..(((((((.&.)))))))-.))))))))).)))))	AUUGG-UCAGUUUGGAGUCGGGUUC&AAAUCCGA-ACCAAACUGAACCAAU	5	134.127	3	0.104587	Output/S24h/cleaveLand_result/t_plot/PC-3p-119396_62_XM_016077837.2_485_TPlot.pdf	2	66.6089	3	0.0858874	Output/S8h/cleaveLand_result/t_plot/PC-3p-119396_62_XM_016077837.2_485_TPlot.pdf	134.127	66.6089	1.00982	up	1.8815e-06	2.16644e-06	yes	GO:0036094(small molecule binding);GO:0005515(protein binding);GO:0005488(binding);GO:0006457(protein folding);GO:0032553(ribonucleotide binding);GO:0043168(anion binding);GO:0032559(adenyl ribonucleotide binding);GO:0006950(response to stress);GO:0043167(ion binding);GO:0000166(nucleotide binding);GO:0009987(cellular process);GO:0017076(purine nucleotide binding);GO:0097159(organic cyclic compou…	ko04141(Protein processing in endoplasmic reticulum);ko04626(Plant-pathogen interaction)
PC-3p-119396_62	XM_016079227.2	247	271	262	-37.9	-25	0.659631	10.5	4-6,268-266;8-16,264-256;18-23,253-248	1-3,271-269[UP5];7-7,265-265[SIL];17-17,255-254[AILt];24-24,247-247[UP3]	.((((((..(((((((((.(((...&...))).)))))))))-.)))))).	UUUGGUUGUGGUUUGGUUGGGAGAA&AAAUCCGAACCAAACU-GAACCAAU	2	53.6509	3	0.329142	Output/S24h/cleaveLand_result/t_plot/PC-3p-119396_62_XM_016079227.2_262_TPlot.pdf	1	33.3045	4	0.966036	Output/S8h/cleaveLand_result/t_plot/PC-3p-119396_62_XM_016079227.2_262_TPlot.pdf	53.6509	33.3045	0.687888	up	0.029111	0.0312173	yes	GO:0005623(cell);GO:0065007(biological regulation);GO:0050789(regulation of biological process);GO:0009987(cellular process);GO:0065008(regulation of biological quality);GO:0050794(regulation of cellular process);GO:0042592(homeostatic process);GO:0019725(cellular homeostasis);GO:0045454(cell redox homeostasis)	NA
PC-3p-119396_62	XM_016091316.2	419	453	444	-37.9	-27.3	0.720317	27.5	3-12,451-442;13-23,430-420	1-2,453-452[UP5];x-x,441-431[BULt];24-24,419-419[UP3]	.(((((((((((...........((((((((((..&..))))))))))-----------))))))))))).	UUUGGUUCGGUUUGGGAGCGAGGUGGUUCGGGUGG&AAAUCCGAACCA-----------AACUGAACCAAU	0	0	NA	NA	NA	1	33.3045	4	0.581972	Output/S8h/cleaveLand_result/t_plot/PC-3p-119396_62_XM_016091316.2_444_TPlot.pdf	0	33.3045	-Inf	down	7.8779e-09	1.51467e-08	yes	GO:0036094(small molecule binding);GO:0000166(nucleotide binding);GO:1901363(heterocyclic compound binding);GO:0004499(N,N-dimethylaniline monooxygenase activity);GO:0050660(flavin adenine dinucleotide binding);GO:0050661(NADP binding);GO:0043168(anion binding);GO:0003824(catalytic activity);GO:0004497(monooxygenase activity);GO:0016705(oxidoreductase activity, acting on paired donors, with incor…	NA
PC-3p-119396_62	XM_016110937.2	1096	1120	1111	-37.9	-25.1	0.662269	10.5	3-12,1118-1109;13-17,1107-1103;19-21,1101-1099	1-2,1120-1119[UP5];x-x,1108-1108[BULt];18-18,1102-1102[SIL];22-24,1098-1096[UP3]	...(((.(((((.((((((((((..&..))))))))))-))))).)))...	AUAGGUCCGGUUCUGGUUCGGGUCG&AAAUCCGAACCA-AACUGAACCAAU	4	107.302	2	0.712589	Output/S24h/cleaveLand_result/t_plot/PC-3p-119396_62_XM_016110937.2_1111_TPlot.pdf	5	166.522	2	0.643497	Output/S8h/cleaveLand_result/t_plot/PC-3p-119396_62_XM_016110937.2_1111_TPlot.pdf	107.302	166.522	-0.63404	down	0.00034487	0.000380917	yes	GO:0005488(binding);GO:0046872(metal ion binding);GO:0043167(ion binding);GO:0043169(cation binding)	NA
PC-3p-120365_61	XM_016101238.2	1467	1489	1481	-34.5	-23.5	0.681159	7.5	2-7,1488-1483;10-23,1481-1468	1-1,1489-1489[UP5];8-9,1482-1482[AILq];24-24,1467-1467[UP3]	.((((((((((((((.-((((((.&.))))))..)))))))))))))).	AGUGUGUUGAUUCUUC-UUCAUUG&AAAUGAACUGAGAAUUAACACACA	1	26.8255	4	0.261576	Output/S24h/cleaveLand_result/t_plot/PC-3p-120365_61_XM_016101238.2_1481_TPlot.pdf	0	0	NA	NA	NA	26.8255	0	Inf	up	2.2264e-07	2.57434e-07	yes	NA	ko04120(Ubiquitin mediated proteolysis)
PC-3p-121413_60	BGI_novel_T001060	679	698	689	-32.3	-24.8	0.767802	3.5	1-19,698-680	20-20,679-679[UP3]	.(((((((((((((((((((&))))))))))))))))))).	CAGUUUUCUUUGUGUGAAAA&UUUUCACACGGAGAAGACUA	1	26.8255	4	0.332567	Output/S24h/cleaveLand_result/t_plot/PC-3p-121413_60_BGI_novel_T001060_689_TPlot.pdf	0	0	NA	NA	NA	26.8255	0	Inf	up	2.2264e-07	2.57434e-07	yes	GO:0006952(defense response);GO:0006950(response to stress);GO:0050896(response to stimulus);GO:0009607(response to biotic stimulus)	NA
PC-3p-121413_60	BGI_novel_T001061	711	730	721	-32.3	-24.8	0.767802	3.5	1-19,730-712	20-20,711-711[UP3]	.(((((((((((((((((((&))))))))))))))))))).	CAGUUUUCUUUGUGUGAAAA&UUUUCACACGGAGAAGACUA	1	26.8255	4	0.261576	Output/S24h/cleaveLand_result/t_plot/PC-3p-121413_60_BGI_novel_T001061_721_TPlot.pdf	0	0	NA	NA	NA	26.8255	0	Inf	up	2.2264e-07	2.57434e-07	yes	GO:0006952(defense response);GO:0006950(response to stress);GO:0050896(response to stimulus);GO:0009607(response to biotic stimulus)	NA
PC-3p-121413_60	BGI_novel_T001062	596	615	606	-32.3	-24.8	0.767802	3.5	1-19,615-597	20-20,596-596[UP3]	.(((((((((((((((((((&))))))))))))))))))).	CAGUUUUCUUUGUGUGAAAA&UUUUCACACGGAGAAGACUA	1	26.8255	4	0.297969	Output/S24h/cleaveLand_result/t_plot/PC-3p-121413_60_BGI_novel_T001062_606_TPlot.pdf	0	0	NA	NA	NA	26.8255	0	Inf	up	2.2264e-07	2.57434e-07	yes	GO:0006952(defense response);GO:0006950(response to stress);GO:0050896(response to stimulus);GO:0009607(response to biotic stimulus)	NA
PC-3p-121413_60	BGI_novel_T001063	596	615	606	-32.3	-24.8	0.767802	3.5	1-19,615-597	20-20,596-596[UP3]	.(((((((((((((((((((&))))))))))))))))))).	CAGUUUUCUUUGUGUGAAAA&UUUUCACACGGAGAAGACUA	0	0	NA	NA	NA	1	33.3045	4	0.318133	Output/S8h/cleaveLand_result/t_plot/PC-3p-121413_60_BGI_novel_T001063_606_TPlot.pdf	0	33.3045	-Inf	down	7.8779e-09	1.51467e-08	yes	GO:0050896(response to stimulus);GO:0009607(response to biotic stimulus);GO:0006952(defense response);GO:0006950(response to stress)	NA
PC-3p-121413_60	BGI_novel_T001065	596	615	606	-32.3	-24.8	0.767802	3.5	1-19,615-597	20-20,596-596[UP3]	.(((((((((((((((((((&))))))))))))))))))).	CAGUUUUCUUUGUGUGAAAA&UUUUCACACGGAGAAGACUA	0	0	NA	NA	NA	1	33.3045	4	0.303472	Output/S8h/cleaveLand_result/t_plot/PC-3p-121413_60_BGI_novel_T001065_606_TPlot.pdf	0	33.3045	-Inf	down	7.8779e-09	1.51467e-08	yes	GO:0050896(response to stimulus);GO:0009607(response to biotic stimulus);GO:0006952(defense response);GO:0006950(response to stress)	NA
PC-3p-121413_60	BGI_novel_T001067	603	622	613	-32.3	-24.8	0.767802	3.5	1-19,622-604	20-20,603-603[UP3]	.(((((((((((((((((((&))))))))))))))))))).	CAGUUUUCUUUGUGUGAAAA&UUUUCACACGGAGAAGACUA	2	53.6509	3	0.0369599	Output/S24h/cleaveLand_result/t_plot/PC-3p-121413_60_BGI_novel_T001067_613_TPlot.pdf	0	0	NA	NA	NA	53.6509	0	Inf	up	2.3929e-13	1.027e-12	yes	GO:0050896(response to stimulus);GO:0009607(response to biotic stimulus);GO:0006952(defense response);GO:0006950(response to stress)	NA
PC-3p-121413_60	BGI_novel_T002717	573	592	583	-32.3	-22.1	0.684211	5.5	1-11,592-582;13-14,580-579;16-20,577-573	12-12,581-581[SIL];15-15,578-578[SIL]	(((((.((.(((((((((((&))))))))))).)).)))))	UGGUCAUCGCUGUGUGGAAA&UUUUCACACGGAGAAGACUA	0	0	NA	NA	NA	2	66.6089	2	0.810494	Output/S8h/cleaveLand_result/t_plot/PC-3p-121413_60_BGI_novel_T002717_583_TPlot.pdf	0	66.6089	-Inf	down	3.3071e-16	2.22267e-15	yes	GO:0071704(organic substance metabolic process);GO:0000166(nucleotide binding);GO:0097159(organic cyclic compound binding);GO:0005622(intracellular);GO:0043231(intracellular membrane-bounded organelle);GO:0090304(nucleic acid metabolic process);GO:0030554(adenyl nucleotide binding);GO:0046483(heterocycle metabolic process);GO:0005524(ATP binding);GO:0006260(DNA replication);GO:0017076(purine nucl…	ko03410(Base excision repair);ko03420(Nucleotide excision repair);ko03030(DNA replication);ko03430(Mismatch repair)
PC-3p-121413_60	BGI_novel_T003224	381	400	391	-32.3	-21.9	0.678019	4.5	1-9,400-392;11-15,390-386;17-20,384-381	10-10,391-391[SIL];16-16,385-385[SIL]	((((.(((((.(((((((((&))))))))).))))).))))	UAGUGUUUUUGGUGUGAAAA&UUUUCACACGGAGAAGACUA	0	0	NA	NA	NA	1	33.3045	4	0.995953	Output/S8h/cleaveLand_result/t_plot/PC-3p-121413_60_BGI_novel_T003224_391_TPlot.pdf	0	33.3045	-Inf	down	7.8779e-09	1.51467e-08	yes	GO:0097159(organic cyclic compound binding);GO:0000373(Group II intron splicing);GO:0003723(RNA binding);GO:0044238(primary metabolic process);GO:0043170(macromolecule metabolic process);GO:0000375(RNA splicing, via transesterification reactions);GO:0010467(gene expression);GO:0016070(RNA metabolic process);GO:1901360(organic cyclic compound metabolic process);GO:0090304(nucleic acid metabolic pr…	ko03018(RNA degradation)
PC-3p-121413_60	BGI_novel_T005078	2197	2216	2207	-32.3	-21.8	0.674923	8.5	2-6,2215-2211;9-19,2208-2198	1-1,2216-2216[UP5];7-8,2210-2209[SIL];20-20,2197-2197[UP3]	.(((((((((((..(((((.&.)))))..))))))))))).	AAGUUUUCUCCGGAUGGGAC&UUUUCACACGGAGAAGACUA	0	0	NA	NA	NA	1	33.3045	4	0.998037	Output/S8h/cleaveLand_result/t_plot/PC-3p-121413_60_BGI_novel_T005078_2207_TPlot.pdf	0	33.3045	-Inf	down	7.8779e-09	1.51467e-08	yes	GO:0005488(binding);GO:0007010(cytoskeleton organization);GO:0003676(nucleic acid binding);GO:0005622(intracellular);GO:2000112(regulation of cellular macromolecule biosynthetic process);GO:0009725(response to hormone);GO:0006996(organelle organization);GO:0065007(biological regulation);GO:0031326(regulation of cellular biosynthetic process);GO:0010033(response to organic substance);GO:0009719(re…	NA
PC-3p-121413_60	BGI_novel_T005212	1318	1341	1332	-32.3	-21	0.650155	11.5	1-8,1341-1334;10-11,1332-1331;12-20,1326-1318	9-9,1333-1333[SIL];x-x,1330-1327[BULt]	(((((((((....((.((((((((&)))))))).))----)))))))))	UGGUCUUCUUGCACCUUGUGAAGA&UUUUCACACGG----AGAAGACUA	0	0	NA	NA	NA	1	33.3045	4	0.999987	Output/S8h/cleaveLand_result/t_plot/PC-3p-121413_60_BGI_novel_T005212_1332_TPlot.pdf	0	33.3045	-Inf	down	7.8779e-09	1.51467e-08	yes	NA	ko01110(Biosynthesis of secondary metabolites);ko00860(Porphyrin and chlorophyll metabolism);ko00190(Oxidative phosphorylation);ko01100(Metabolic pathways)
PC-3p-121413_60	BGI_novel_T007975	3638	3661	3648	-32.3	-21.78	0.674303	13.5	2-8,3660-3654;10-19,3648-3639	1-1,3661-3661[UP5];9-9,3653-3649[AILt];20-20,3638-3638[UP3]	.((((((((((.....(((((((.&.)))))))----.)))))))))).	GGGUCUUCUCCACCUAUGUGGAAU&UUUUCACA----CGGAGAAGACUA	1	26.8255	4	0.999527	Output/S24h/cleaveLand_result/t_plot/PC-3p-121413_60_BGI_novel_T007975_3648_TPlot.pdf	0	0	NA	NA	NA	26.8255	0	Inf	up	2.2264e-07	2.57434e-07	yes	GO:0018130(heterocycle biosynthetic process);GO:0016817(hydrolase activity, acting on acid anhydrides);GO:0044464(cell part);GO:0043227(membrane-bounded organelle);GO:0043226(organelle);GO:0032991(macromolecular complex);GO:0033554(cellular response to stress);GO:0097367(carbohydrate derivative binding);GO:0044260(cellular macromolecule metabolic process);GO:0071840(cellular component organizatio…	NA
PC-3p-121413_60	BGI_novel_T009438	697	718	708	-32.3	-22.6	0.69969	6.5	1-9,718-710;10-13,708-705;14-19,703-698	x-x,709-709[BULt];x-x,704-704[BULt];20-20,697-697[UP3]	.((((((.((((.(((((((((&)))))))))-))))-)))))).	CGGUCUUCCUCUGGUGUGAAGA&UUUUCACAC-GGAG-AAGACUA	1	26.8255	4	0.971648	Output/S24h/cleaveLand_result/t_plot/PC-3p-121413_60_BGI_novel_T009438_708_TPlot.pdf	0	0	NA	NA	NA	26.8255	0	Inf	up	2.2264e-07	2.57434e-07	yes	GO:0008152(metabolic process);GO:0044444(cytoplasmic part);GO:0044237(cellular metabolic process);GO:0044434(chloroplast part);GO:0019438(aromatic compound biosynthetic process);GO:0009987(cellular process);GO:0046483(heterocycle metabolic process);GO:0043231(intracellular membrane-bounded organelle);GO:0043167(ion binding);GO:0044422(organelle part);GO:0043094(cellular metabolic compound salvage…	ko01110(Biosynthesis of secondary metabolites);ko00630(Glyoxylate and dicarboxylate metabolism);ko01100(Metabolic pathways);ko00260(Glycine, serine and threonine metabolism);ko01200(Carbon metabolism);ko00561(Glycerolipid metabolism);ko00860(Porphyrin and chlorophyll metabolism)
PC-3p-121413_60	XM_016076477.2	184	204	195	-32.3	-21.9	0.678019	8	2-12,203-193;13-15,191-189;17-18,187-186	1-1,204-204[UP5];x-x,192-192[BULt];16-16,188-188[SIL];19-20,185-184[UP3]	..((.(((.(((((((((((.&.)))))))))))-))).))..	UUGUGUUCUUCCGUGUGGAGC&UUUUCACACGGA-GAAGACUA	2	53.6509	3	0.464824	Output/S24h/cleaveLand_result/t_plot/PC-3p-121413_60_XM_016076477.2_195_TPlot.pdf	1	33.3045	4	0.994994	Output/S8h/cleaveLand_result/t_plot/PC-3p-121413_60_XM_016076477.2_195_TPlot.pdf	53.6509	33.3045	0.687888	up	0.029111	0.0312173	yes	NA	NA
PC-3p-121413_60	XM_016080261.2	1867	1886	1877	-32.3	-22.9	0.708978	10	5-13,1882-1874;16-19,1871-1868	1-4,1886-1883[UP5];14-15,1873-1872[SIL];20-20,1867-1867[UP3]	.((((..(((((((((....&....)))))))))..)))).	CAGUCGGCUCCGUGUGUCCU&UUUUCACACGGAGAAGACUA	3	80.4764	2	0.612602	Output/S24h/cleaveLand_result/t_plot/PC-3p-121413_60_XM_016080261.2_1877_TPlot.pdf	0	0	NA	NA	NA	80.4764	0	Inf	up	2.9371e-19	3.48128e-18	yes	GO:0009987(cellular process);GO:0005623(cell);GO:1901265(nucleoside phosphate binding);GO:0016020(membrane);GO:0071944(cell periphery);GO:0016818(hydrolase activity, acting on acid anhydrides, in phosphorus-containing anhydrides);GO:0008568(microtubule-severing ATPase activity);GO:1901363(heterocyclic compound binding);GO:0016887(ATPase activity);GO:0032555(purine ribonucleotide binding);GO:00325…	ko04141(Protein processing in endoplasmic reticulum)
PC-3p-121413_60	XM_016080540.2	642	661	652	-32.3	-24.2	0.749226	5.5	2-8,660-654;10-20,652-642	1-1,661-661[UP5];9-9,653-653[SIL]	(((((((((((.(((((((.&.))))))).)))))))))))	UGGUCUUCUCUUUGUGGAAC&UUUUCACACGGAGAAGACUA	1	26.8255	4	0.554534	Output/S24h/cleaveLand_result/t_plot/PC-3p-121413_60_XM_016080540.2_652_TPlot.pdf	1	33.3045	4	0.493761	Output/S8h/cleaveLand_result/t_plot/PC-3p-121413_60_XM_016080540.2_652_TPlot.pdf	26.8255	33.3045	-0.312112	down	0.40341	0.405116	yes	GO:0016747(transferase activity, transferring acyl groups other than amino-acyl groups);GO:0016746(transferase activity, transferring acyl groups);GO:0003824(catalytic activity);GO:0016740(transferase activity)	ko00943(Isoflavonoid biosynthesis);ko00944(Flavone and flavonol biosynthesis);ko00330(Arginine and proline metabolism)
PC-3p-121413_60	XM_016081466.2	1219	1238	1229	-32.3	-22.3	0.690402	5	2-10,1237-1229;12-20,1227-1219	1-1,1238-1238[UP5];11-11,1228-1228[SIL]	(((((((((.(((((((((.&.))))))))).)))))))))	UGGUUUUCUACGUGUGGAAC&UUUUCACACGGAGAAGACUA	0	0	NA	NA	NA	1	33.3045	4	0.982806	Output/S8h/cleaveLand_result/t_plot/PC-3p-121413_60_XM_016081466.2_1229_TPlot.pdf	0	33.3045	-Inf	down	7.8779e-09	1.51467e-08	yes	GO:0004659(prenyltransferase activity);GO:0043227(membrane-bounded organelle);GO:0009507(chloroplast);GO:0005737(cytoplasm);GO:0043229(intracellular organelle);GO:0003824(catalytic activity);GO:0005623(cell);GO:0044424(intracellular part);GO:0044444(cytoplasmic part);GO:0016765(transferase activity, transferring alkyl or aryl (other than methyl) groups);GO:0009536(plastid);GO:0005622(intracellula…	ko01110(Biosynthesis of secondary metabolites);ko00130(Ubiquinone and other terpenoid-quinone biosynthesis);ko01100(Metabolic pathways)
PC-3p-121413_60	XM_016082338.2	247	265	256	-32.3	-21	0.650155	7.5	1-5,265-261;7-11,259-255;13-20,254-247	6-6,260-260[SIL];12-12,x-x[BULq]	((((((((-(((((.(((((&))))).))))).))))))))	UGGUCUUC-CUGUGGGGAGA&UUUUCACACGGAGAAGACUA	1	26.8255	4	0.999999	Output/S24h/cleaveLand_result/t_plot/PC-3p-121413_60_XM_016082338.2_256_TPlot.pdf	0	0	NA	NA	NA	26.8255	0	Inf	up	2.2264e-07	2.57434e-07	yes	NA	NA
PC-3p-121413_60	XM_016082339.2	642	660	651	-32.3	-21	0.650155	7.5	1-5,660-656;7-11,654-650;13-20,649-642	6-6,655-655[SIL];12-12,x-x[BULq]	((((((((-(((((.(((((&))))).))))).))))))))	UGGUCUUC-CUGUGGGGAGA&UUUUCACACGGAGAAGACUA	2	53.6509	2	0.987383	Output/S24h/cleaveLand_result/t_plot/PC-3p-121413_60_XM_016082339.2_651_TPlot.pdf	0	0	NA	NA	NA	53.6509	0	Inf	up	2.3929e-13	1.027e-12	yes	NA	NA
PC-3p-121413_60	XM_016086460.1	1149	1170	1159	-32.3	-22	0.681115	8	2-6,1169-1165;7-8,1163-1162;9-19,1160-1150	1-1,1170-1170[UP5];x-x,1164-1164[BULt];x-x,1161-1161[BULt];20-20,1149-1149[UP3]	.(((((((((((.((.(((((.&.)))))-))-))))))))))).	GGGUUUUCUCCGAUGAUGAGAG&UUUUCA-CA-CGGAGAAGACUA	10	268.255	2	0.884677	Output/S24h/cleaveLand_result/t_plot/PC-3p-121413_60_XM_016086460.1_1159_TPlot.pdf	6	199.827	2	0.832507	Output/S8h/cleaveLand_result/t_plot/PC-3p-121413_60_XM_016086460.1_1159_TPlot.pdf	268.255	199.827	0.424853	up	0.0015606	0.00172212	yes	NA	NA
PC-3p-121413_60	XM_016087307.2	583	605	593	-32.3	-21.6	0.668731	9	2-6,604-600;7-9,598-596;10-18,593-585	1-1,605-605[UP5];x-x,599-599[BULt];x-x,595-594[BULt];19-20,584-583[UP3]	..(((((((((..(((.(((((.&.)))))-)))--)))))))))..	GUGUCUUCUCCAGGUGUUGAAAG&UUUUCA-CAC--GGAGAAGACUA	0	0	NA	NA	NA	1	33.3045	4	0.999403	Output/S8h/cleaveLand_result/t_plot/PC-3p-121413_60_XM_016087307.2_593_TPlot.pdf	0	33.3045	-Inf	down	7.8779e-09	1.51467e-08	yes	NA	NA
PC-3p-121413_60	XM_016092686.2	78	97	88	-32.3	-21	0.650155	11	5-17,93-81	1-4,97-94[UP5];18-20,80-78[UP3]	...(((((((((((((....&....)))))))))))))...	UCUUCUUCUCUGUGUGCGUC&UUUUCACACGGAGAAGACUA	1	26.8255	4	0.999997	Output/S24h/cleaveLand_result/t_plot/PC-3p-121413_60_XM_016092686.2_88_TPlot.pdf	0	0	NA	NA	NA	26.8255	0	Inf	up	2.2264e-07	2.57434e-07	yes	NA	NA
PC-3p-121413_60	XM_016095001.2	653	672	663	-32.3	-21.7	0.671827	12	6-18,667-655	1-5,672-668[UP5];19-20,654-653[UP3]	..(((((((((((((.....&.....)))))))))))))..	CUGUCUUCUCUGUGUUCCUC&UUUUCACACGGAGAAGACUA	1	26.8255	4	0.999651	Output/S24h/cleaveLand_result/t_plot/PC-3p-121413_60_XM_016095001.2_663_TPlot.pdf	0	0	NA	NA	NA	26.8255	0	Inf	up	2.2264e-07	2.57434e-07	yes	GO:0016020(membrane);GO:0031224(intrinsic component of membrane);GO:0016021(integral component of membrane);GO:0044425(membrane part)	NA
PC-3p-121413_60	XM_016096280.2	572	591	582	-32.3	-22.1	0.684211	5.5	1-11,591-581;13-14,579-578;16-20,576-572	12-12,580-580[SIL];15-15,577-577[SIL]	(((((.((.(((((((((((&))))))))))).)).)))))	UGGUCAUCGCUGUGUGGAAA&UUUUCACACGGAGAAGACUA	0	0	NA	NA	NA	1	33.3045	4	0.992813	Output/S8h/cleaveLand_result/t_plot/PC-3p-121413_60_XM_016096280.2_582_TPlot.pdf	0	33.3045	-Inf	down	7.8779e-09	1.51467e-08	yes	GO:0043167(ion binding);GO:0046872(metal ion binding);GO:0043169(cation binding);GO:0005488(binding);GO:1902456(regulation of stomatal opening);GO:0050789(regulation of biological process);GO:0046914(transition metal ion binding);GO:0010119(regulation of stomatal movement);GO:0065007(biological regulation);GO:0050794(regulation of cellular process);GO:0008270(zinc ion binding)	ko04120(Ubiquitin mediated proteolysis)
PC-3p-121413_60	XM_016096854.2	232	252	242	-32.3	-21.2	0.656347	7	1-6,252-247;7-14,245-238;16-18,236-234	x-x,246-246[BULt];15-15,237-237[SIL];19-20,233-232[UP3]	..(((.((((((((.((((((&))))))-)))))))).)))..	UUGUCCUCUCUGUGCUGAAGA&UUUUCA-CACGGAGAAGACUA	1	26.8255	4	0.999985	Output/S24h/cleaveLand_result/t_plot/PC-3p-121413_60_XM_016096854.2_242_TPlot.pdf	0	0	NA	NA	NA	26.8255	0	Inf	up	2.2264e-07	2.57434e-07	yes	GO:1901265(nucleoside phosphate binding);GO:0000166(nucleotide binding);GO:0003676(nucleic acid binding);GO:0097159(organic cyclic compound binding);GO:0005488(binding);GO:1901363(heterocyclic compound binding);GO:0046914(transition metal ion binding);GO:0043169(cation binding);GO:0046872(metal ion binding);GO:0043167(ion binding);GO:0008270(zinc ion binding);GO:0036094(small molecule binding);GO…	ko03018(RNA degradation)
PC-3p-121413_60	XM_016097602.2	799	819	809	-32.3	-21.6	0.668731	9	2-6,818-814;7-9,812-810;11-18,808-801	1-1,819-819[UP5];x-x,813-813[BULt];10-10,809-809[SIL];19-20,800-799[UP3]	..((((((((.(((.(((((.&.)))))-))).))))))))..	GCGUCUUCUCGGUGCUGAGGU&UUUUCA-CACGGAGAAGACUA	2	53.6509	2	0.951224	Output/S24h/cleaveLand_result/t_plot/PC-3p-121413_60_XM_016097602.2_809_TPlot.pdf	1	33.3045	4	0.999337	Output/S8h/cleaveLand_result/t_plot/PC-3p-121413_60_XM_016097602.2_809_TPlot.pdf	53.6509	33.3045	0.687888	up	0.029111	0.0312173	yes	GO:0044283(small molecule biosynthetic process);GO:0009308(amine metabolic process);GO:0046219(indolalkylamine biosynthetic process);GO:0046483(heterocycle metabolic process);GO:0016835(carbon-oxygen lyase activity);GO:0006568(tryptophan metabolic process);GO:0006725(cellular aromatic compound metabolic process);GO:0071704(organic substance metabolic process);GO:0046394(carboxylic acid biosynthet…	ko01100(Metabolic pathways);ko00260(Glycine, serine and threonine metabolism);ko01230(Biosynthesis of amino acids);ko01110(Biosynthesis of secondary metabolites);ko00400(Phenylalanine, tyrosine and tryptophan biosynthesis)
PC-3p-121413_60	XM_016100109.2	673	693	684	-32.3	-21.3	0.659443	5.5	1-7,693-687;9-16,685-678;17-20,676-673	8-8,686-686[SIL];x-x,677-677[BULt]	((((.((((((((.(((((((&))))))).))))))))-))))	UAGUACUUCUUCGAGUGAGAG&UUUUCACACGGAGAAG-ACUA	0	0	NA	NA	NA	1	33.3045	4	0.999896	Output/S8h/cleaveLand_result/t_plot/PC-3p-121413_60_XM_016100109.2_684_TPlot.pdf	0	33.3045	-Inf	down	7.8779e-09	1.51467e-08	yes	GO:0016818(hydrolase activity, acting on acid anhydrides, in phosphorus-containing anhydrides);GO:0043170(macromolecule metabolic process);GO:1901363(heterocyclic compound binding);GO:0044464(cell part);GO:0004386(helicase activity);GO:1901360(organic cyclic compound metabolic process);GO:0006807(nitrogen compound metabolic process);GO:0005622(intracellular);GO:0032555(purine ribonucleotide bindi…	NA
PC-3p-121413_60	XM_016101719.2	2431	2450	2441	-32.3	-24.5	0.758514	4.5	1-8,2450-2443;10-20,2441-2431	9-9,2442-2442[SIL]	(((((((((((.((((((((&)))))))).)))))))))))	UGGUUUUCUCCUUGUGAGAG&UUUUCACACGGAGAAGACUA	1	26.8255	4	0.507152	Output/S24h/cleaveLand_result/t_plot/PC-3p-121413_60_XM_016101719.2_2441_TPlot.pdf	1	33.3045	4	0.448798	Output/S8h/cleaveLand_result/t_plot/PC-3p-121413_60_XM_016101719.2_2441_TPlot.pdf	26.8255	33.3045	-0.312112	down	0.40341	0.405116	yes	GO:0003825(alpha,alpha-trehalose-phosphate synthase (UDP-forming) activity);GO:0016791(phosphatase activity);GO:0005984(disaccharide metabolic process);GO:0005975(carbohydrate metabolic process);GO:0034637(cellular carbohydrate biosynthetic process);GO:0016051(carbohydrate biosynthetic process);GO:0006796(phosphate-containing compound metabolic process);GO:0004805(trehalose-phosphatase activity);…	ko01100(Metabolic pathways);ko00500(Starch and sucrose metabolism)
PC-3p-121413_60	XM_016103125.2	552	572	562	-32.3	-21.1	0.653251	11	4-7,569-566;9-20,563-552	1-3,572-570[UP5];8-8,565-564[AILt]	((((((((((((..((((...&...))))-.))))))))))))	UGGUUUUCUCCGCCGUGGCCU&UUUUCAC-ACGGAGAAGACUA	1	26.8255	4	0.999993	Output/S24h/cleaveLand_result/t_plot/PC-3p-121413_60_XM_016103125.2_562_TPlot.pdf	1	33.3045	4	0.999953	Output/S8h/cleaveLand_result/t_plot/PC-3p-121413_60_XM_016103125.2_562_TPlot.pdf	26.8255	33.3045	-0.312112	down	0.40341	0.405116	yes	GO:0016020(membrane);GO:0016021(integral component of membrane);GO:0044425(membrane part);GO:0031224(intrinsic component of membrane)	NA
PC-3p-121413_60	XM_016103668.2	559	578	569	-32.3	-21.5	0.665635	8	1-13,578-566	14-20,565-559[UP3]	.......(((((((((((((&))))))))))))).......	CAUGUGGCUCCGUGUGAGAA&UUUUCACACGGAGAAGACUA	0	0	NA	NA	NA	2	66.6089	1	0.148343	Output/S8h/cleaveLand_result/t_plot/PC-3p-121413_60_XM_016103668.2_569_TPlot.pdf	0	66.6089	-Inf	down	3.3071e-16	2.22267e-15	yes	GO:0016757(transferase activity, transferring glycosyl groups);GO:0003824(catalytic activity);GO:0016740(transferase activity)	NA
PC-3p-121413_60	XM_016103671.2	756	775	766	-32.3	-21.5	0.665635	8	1-13,775-763	14-20,762-756[UP3]	.......(((((((((((((&))))))))))))).......	CAUGUGGCUCCGUGUGAGAA&UUUUCACACGGAGAAGACUA	1	26.8255	4	0.999932	Output/S24h/cleaveLand_result/t_plot/PC-3p-121413_60_XM_016103671.2_766_TPlot.pdf	0	0	NA	NA	NA	26.8255	0	Inf	up	2.2264e-07	2.57434e-07	yes	GO:0016757(transferase activity, transferring glycosyl groups);GO:0003824(catalytic activity);GO:0016740(transferase activity)	NA
PC-3p-121413_60	XM_016104760.2	454	473	464	-32.3	-21.1	0.653251	7.5	1-10,473-464;12-17,462-457	11-11,463-463[SIL];18-20,456-454[UP3]	...((((((.((((((((((&)))))))))).))))))...	AUAUCUUCUGUGUGUGAAGG&UUUUCACACGGAGAAGACUA	1	26.8255	4	0.999993	Output/S24h/cleaveLand_result/t_plot/PC-3p-121413_60_XM_016104760.2_464_TPlot.pdf	0	0	NA	NA	NA	26.8255	0	Inf	up	2.2264e-07	2.57434e-07	yes	GO:0016829(lyase activity);GO:0003824(catalytic activity);GO:0004609(phosphatidylserine decarboxylase activity);GO:0016831(carboxy-lyase activity);GO:0016830(carbon-carbon lyase activity)	ko04144(Endocytosis)
PC-3p-121413_60	XM_016106971.2	416	436	427	-32.3	-22.4	0.693498	9	4-14,433-423;15-19,421-417	1-3,436-434[UP5];x-x,422-422[BULt];20-20,416-416[UP3]	.(((((.(((((((((((...&...)))))))))))-))))).	CGGUCUAUUUCCGUGUGGCAA&UUUUCACACGGAGA-AGACUA	1	26.8255	4	0.989147	Output/S24h/cleaveLand_result/t_plot/PC-3p-121413_60_XM_016106971.2_427_TPlot.pdf	1	33.3045	4	0.977806	Output/S8h/cleaveLand_result/t_plot/PC-3p-121413_60_XM_016106971.2_427_TPlot.pdf	26.8255	33.3045	-0.312112	down	0.40341	0.405116	yes	NA	ko04626(Plant-pathogen interaction)
PC-3p-121413_60	XM_016108187.2	3510	3530	3521	-32.3	-21.5	0.665635	8.5	4-11,3527-3520;12-16,3518-3514;18-20,3512-3510	1-3,3530-3528[UP5];x-x,3519-3519[BULt];17-17,3513-3513[SIL]	(((.(((((.((((((((...&...))))))))-))))).)))	UGGACUUCUGCCGUGUGAUGC&UUUUCACACGG-AGAAGACUA	1	26.8255	4	0.999929	Output/S24h/cleaveLand_result/t_plot/PC-3p-121413_60_XM_016108187.2_3521_TPlot.pdf	0	0	NA	NA	NA	26.8255	0	Inf	up	2.2264e-07	2.57434e-07	yes	NA	NA
PC-3p-121413_60	XM_016109773.2	1017	1034	1026	-32.3	-23.4	0.724458	5.5	1-7,1034-1028;9-11,1027-1025;13-20,1024-1017	8-8,x-x[BULq];12-12,x-x[BULq]	((((((((-(((-(((((((&))))))).))).))))))))	UGGUCUUC-CCG-GUGAGAA&UUUUCACACGGAGAAGACUA	2	53.6509	2	0.534159	Output/S24h/cleaveLand_result/t_plot/PC-3p-121413_60_XM_016109773.2_1026_TPlot.pdf	0	0	NA	NA	NA	53.6509	0	Inf	up	2.3929e-13	1.027e-12	yes	GO:0016020(membrane)	NA
PC-3p-121413_60	XM_016110631.2	837	858	847	-32.3	-21.1	0.653251	10	3-9,856-850;10-17,847-840	1-2,858-857[UP5];x-x,849-848[BULt];18-20,839-837[UP3]	...((((((((..(((((((..&..)))))))--))))))))...	UCUUCUUCUCCAUGUGUGAAUG&UUUUCACAC--GGAGAAGACUA	1	26.8255	4	0.999993	Output/S24h/cleaveLand_result/t_plot/PC-3p-121413_60_XM_016110631.2_847_TPlot.pdf	0	0	NA	NA	NA	26.8255	0	Inf	up	2.2264e-07	2.57434e-07	yes	GO:0016787(hydrolase activity);GO:0003824(catalytic activity);GO:0005975(carbohydrate metabolic process);GO:0052692(raffinose alpha-galactosidase activity);GO:0071704(organic substance metabolic process);GO:0004557(alpha-galactosidase activity);GO:0015925(galactosidase activity);GO:0044238(primary metabolic process);GO:0004553(hydrolase activity, hydrolyzing O-glycosyl compounds);GO:0016798(hydro…	ko00600(Sphingolipid metabolism);ko01100(Metabolic pathways);ko00052(Galactose metabolism);ko00603(Glycosphingolipid biosynthesis - globo and isoglobo series);ko00561(Glycerolipid metabolism)
PC-3p-121413_60	XM_016111080.2	123	142	133	-32.3	-21	0.650155	11	5-17,138-126	1-4,142-139[UP5];18-20,125-123[UP3]	...(((((((((((((....&....)))))))))))))...	UCUUCUUCUCUGUGUGCGUC&UUUUCACACGGAGAAGACUA	1	26.8255	4	0.999999	Output/S24h/cleaveLand_result/t_plot/PC-3p-121413_60_XM_016111080.2_133_TPlot.pdf	0	0	NA	NA	NA	26.8255	0	Inf	up	2.2264e-07	2.57434e-07	yes	NA	NA
PC-3p-121413_60	XM_016113896.2	560	579	569	-32.3	-21.1	0.653251	7.5	1-7,579-573;9-16,570-563;18-19,562-561	8-8,572-571[AILt];17-17,x-x[BULq];20-20,560-560[UP3]	.((-((((((((..(((((((&)))))))-.)))))))).)).	CAG-CUUCUCCGGCGUGGAAG&UUUUCAC-ACGGAGAAGACUA	0	0	NA	NA	NA	1	33.3045	4	0.999966	Output/S8h/cleaveLand_result/t_plot/PC-3p-121413_60_XM_016113896.2_569_TPlot.pdf	0	33.3045	-Inf	down	7.8779e-09	1.51467e-08	yes	NA	NA
PC-3p-121413_60	XM_016117021.2	1060	1080	1071	-32.3	-23.8	0.736842	7.5	2-12,1079-1069;14-19,1066-1061	1-1,1080-1080[UP5];13-13,1068-1067[AILt];20-20,1060-1060[UP3]	.((((((..(((((((((((.&.)))))))))))-.)))))).	GGGUCUUGAUCCGUGUGGAGU&UUUUCACACGGA-GAAGACUA	0	0	NA	NA	NA	2	66.6089	2	0.334192	Output/S8h/cleaveLand_result/t_plot/PC-3p-121413_60_XM_016117021.2_1071_TPlot.pdf	0	66.6089	-Inf	down	3.3071e-16	2.22267e-15	yes	GO:0031224(intrinsic component of membrane);GO:0044425(membrane part);GO:0016021(integral component of membrane);GO:0016020(membrane)	NA
PC-3p-121413_60	XM_021124576.1	74	92	84	-32.3	-21.7	0.671827	5	1-8,92-85;10-20,84-74	9-9,x-x[BULq]	(((((((((((-((((((((&)))))))).)))))))))))	UGGUUUUCUUC-UGUGAAGA&UUUUCACACGGAGAAGACUA	1	26.8255	4	0.999623	Output/S24h/cleaveLand_result/t_plot/PC-3p-121413_60_XM_021124576.1_84_TPlot.pdf	0	0	NA	NA	NA	26.8255	0	Inf	up	2.2264e-07	2.57434e-07	yes	NA	ko03015(mRNA surveillance pathway)
PC-3p-121413_60	XM_021125706.1	3673	3696	3683	-32.3	-21.78	0.674303	13.5	2-8,3695-3689;10-19,3683-3674	1-1,3696-3696[UP5];9-9,3688-3684[AILt];20-20,3673-3673[UP3]	.((((((((((.....(((((((.&.)))))))----.)))))))))).	GGGUCUUCUCCACCUAUGUGGAAU&UUUUCACA----CGGAGAAGACUA	0	0	NA	NA	NA	1	33.3045	4	0.998379	Output/S8h/cleaveLand_result/t_plot/PC-3p-121413_60_XM_021125706.1_3683_TPlot.pdf	0	33.3045	-Inf	down	7.8779e-09	1.51467e-08	yes	GO:0018130(heterocycle biosynthetic process);GO:0016817(hydrolase activity, acting on acid anhydrides);GO:0044464(cell part);GO:0043227(membrane-bounded organelle);GO:0043226(organelle);GO:0032991(macromolecular complex);GO:0033554(cellular response to stress);GO:0097367(carbohydrate derivative binding);GO:0044260(cellular macromolecule metabolic process);GO:0071840(cellular component organizatio…	NA
PC-3p-121413_60	XM_021130041.1	1212	1232	1222	-32.3	-21.6	0.668731	6.5	1-6,1232-1227;7-15,1225-1217;17-19,1215-1213	x-x,1226-1226[BULt];16-16,1216-1216[SIL];20-20,1212-1212[UP3]	.(((.(((((((((.((((((&))))))-))))))))).))).	GGGUGUUUUCCGUGCUGGAAG&UUUUCA-CACGGAGAAGACUA	0	0	NA	NA	NA	1	33.3045	4	0.999262	Output/S8h/cleaveLand_result/t_plot/PC-3p-121413_60_XM_021130041.1_1222_TPlot.pdf	0	33.3045	-Inf	down	7.8779e-09	1.51467e-08	yes	GO:0046914(transition metal ion binding);GO:0030054(cell junction);GO:0005623(cell);GO:0016491(oxidoreductase activity);GO:0071944(cell periphery);GO:0043169(cation binding);GO:0009505(plant-type cell wall);GO:0003824(catalytic activity);GO:0030312(external encapsulating structure);GO:0005488(binding);GO:0055114(oxidation-reduction process);GO:0008152(metabolic process);GO:0016722(oxidoreductase …	NA
PC-3p-121413_60	XM_021131237.1	966	984	976	-32.3	-21.7	0.671827	7	1-7,984-978;9-16,977-970	8-8,x-x[BULq];17-20,969-966[UP3]	....((((((((-(((((((&))))))).))))))))....	UCCACUUCUCCG-GUGAGAA&UUUUCACACGGAGAAGACUA	1	26.8255	4	0.999755	Output/S24h/cleaveLand_result/t_plot/PC-3p-121413_60_XM_021131237.1_976_TPlot.pdf	0	0	NA	NA	NA	26.8255	0	Inf	up	2.2264e-07	2.57434e-07	yes	NA	ko03010(Ribosome)
PC-3p-121413_60	XM_021137201.1	540	559	550	-32.3	-22.1	0.684211	5.5	1-11,559-549;13-14,547-546;16-20,544-540	12-12,548-548[SIL];15-15,545-545[SIL]	(((((.((.(((((((((((&))))))))))).)).)))))	UGGUCAUCGCUGUGUGGAAA&UUUUCACACGGAGAAGACUA	0	0	NA	NA	NA	1	33.3045	4	0.991834	Output/S8h/cleaveLand_result/t_plot/PC-3p-121413_60_XM_021137201.1_550_TPlot.pdf	0	33.3045	-Inf	down	7.8779e-09	1.51467e-08	yes	GO:0043167(ion binding);GO:0046872(metal ion binding);GO:0043169(cation binding);GO:0005488(binding);GO:1902456(regulation of stomatal opening);GO:0050789(regulation of biological process);GO:0046914(transition metal ion binding);GO:0010119(regulation of stomatal movement);GO:0065007(biological regulation);GO:0050794(regulation of cellular process);GO:0008270(zinc ion binding)	ko04120(Ubiquitin mediated proteolysis)
PC-3p-121413_60	XM_021139045.1	1877	1897	1887	-32.3	-21.3	0.659443	6.5	3-9,1895-1889;10-15,1887-1882;17-20,1880-1877	1-2,1897-1896[UP5];x-x,1888-1888[BULt];16-16,1881-1881[SIL]	((((.((((((.(((((((..&..)))))))-)))))).))))	UGGUAUUCUCCGGUGUGAAUC&UUUUCACAC-GGAGAAGACUA	1	26.8255	4	0.999973	Output/S24h/cleaveLand_result/t_plot/PC-3p-121413_60_XM_021139045.1_1887_TPlot.pdf	0	0	NA	NA	NA	26.8255	0	Inf	up	2.2264e-07	2.57434e-07	yes	NA	NA
PC-3p-121413_60	XM_021139422.1	1215	1234	1225	-32.3	-21	0.650155	6	1-6,1234-1229;8-14,1227-1221;16-18,1219-1217	7-7,1228-1228[SIL];15-15,1220-1220[SIL];19-20,1216-1215[UP3]	..(((.(((((((.((((((&)))))).))))))).)))..	UUGUCAUCUCCGUUUGAAGA&UUUUCACACGGAGAAGACUA	1	26.8255	4	0.999996	Output/S24h/cleaveLand_result/t_plot/PC-3p-121413_60_XM_021139422.1_1225_TPlot.pdf	0	0	NA	NA	NA	26.8255	0	Inf	up	2.2264e-07	2.57434e-07	yes	GO:0046983(protein dimerization activity);GO:0005488(binding);GO:0005515(protein binding)	NA
PC-3p-121413_60	XM_021140264.1	873	896	887	-32.3	-21	0.650155	11.5	1-8,896-889;10-11,887-886;12-20,881-873	9-9,888-888[SIL];x-x,885-882[BULt]	(((((((((....((.((((((((&)))))))).))----)))))))))	UGGUCUUCUUGCACCUUGUGAAGA&UUUUCACACGG----AGAAGACUA	0	0	NA	NA	NA	1	33.3045	4	0.999981	Output/S8h/cleaveLand_result/t_plot/PC-3p-121413_60_XM_021140264.1_887_TPlot.pdf	0	33.3045	-Inf	down	7.8779e-09	1.51467e-08	yes	NA	ko01110(Biosynthesis of secondary metabolites);ko00860(Porphyrin and chlorophyll metabolism);ko00190(Oxidative phosphorylation);ko01100(Metabolic pathways)
PC-3p-122043_60	BGI_novel_T006488	2089	2113	2103	-37.3	-27.4	0.734584	7.5	2-9,2112-2105;10-14,2103-2099;16-24,2097-2089	1-1,2113-2113[UP5];x-x,2104-2104[BULt];15-15,2098-2098[SIL]	(((((((((.(((((.((((((((.&.))))))))-))))).)))))))))	GUGUGUGUAGGUUUCAAGUUCCUGC&AUAGGAACU-GGAACGUACAUAUAU	0	0	NA	NA	NA	2	66.6089	2	0.0632803	Output/S8h/cleaveLand_result/t_plot/PC-3p-122043_60_BGI_novel_T006488_2103_TPlot.pdf	0	66.6089	-Inf	down	3.3071e-16	2.22267e-15	yes	NA	NA
PC-3p-122043_60	XM_021127206.1	1841	1870	1856	-37.3	-25.5	0.683646	14.5	2-8,1869-1863;9-14,1857-1852;15-22,1850-1843	1-1,1870-1870[UP5];x-x,1862-1858[BULt];x-x,1851-1851[BULt];23-24,1842-1841[UP3]	..((((((((.((((((.....(((((((.&.)))))))-----))))))-))))))))..	GAGUAUGUACAGUUCCAAACAUGUUCCUAG&AUAGGAAC-----UGGAAC-GUACAUAUAU	0	0	NA	NA	NA	1	33.3045	4	0.590771	Output/S8h/cleaveLand_result/t_plot/PC-3p-122043_60_XM_021127206.1_1856_TPlot.pdf	0	33.3045	-Inf	down	7.8779e-09	1.51467e-08	yes	GO:0044464(cell part);GO:0043226(organelle);GO:0043227(membrane-bounded organelle);GO:0044424(intracellular part);GO:0005623(cell);GO:0003676(nucleic acid binding);GO:0005634(nucleus);GO:0005622(intracellular);GO:0043229(intracellular organelle);GO:1901363(heterocyclic compound binding);GO:0043231(intracellular membrane-bounded organelle);GO:0003677(DNA binding);GO:0097159(organic cyclic compound…	NA
PC-3p-122748_59	BGI_novel_T007568	816	840	831	-43.4	-28.7	0.66129	8.5	2-11,839-830;12-16,828-824;19-23,821-817	1-1,840-840[UP5];x-x,829-829[BULt];17-18,823-822[SIL];24-24,816-816[UP3]	.(((((..(((((.((((((((((.&.))))))))))-)))))..))))).	UGGGAUGAAGGUGAUAGUGGACUUG&AAAGUCCACUG-CACCUGAGUUUCU	1	26.8255	4	0.990906	Output/S24h/cleaveLand_result/t_plot/PC-3p-122748_59_BGI_novel_T007568_831_TPlot.pdf	0	0	NA	NA	NA	26.8255	0	Inf	up	2.2264e-07	2.57434e-07	yes	GO:0044877(macromolecular complex binding);GO:0004338(glucan exo-1,3-beta-glucosidase activity);GO:0007010(cytoskeleton organization);GO:0030029(actin filament-based process);GO:0005488(binding);GO:0006996(organelle organization);GO:0030036(actin cytoskeleton organization);GO:0032403(protein complex binding);GO:0008152(metabolic process);GO:0016798(hydrolase activity, acting on glycosyl bonds);GO…	ko04626(Plant-pathogen interaction);ko00500(Starch and sucrose metabolism);ko04016(MAPK signaling pathway - plant)
PC-3p-122748_59	XM_016076238.2	1533	1558	1549	-43.4	-28.5	0.656682	8	3-12,1556-1547;15-18,1544-1541;19-22,1539-1536;23-24,1534-1533	1-2,1558-1557[UP5];13-14,1546-1545[SIL];x-x,1540-1540[BULt];x-x,1535-1535[BULt]	((.((((.((((..((((((((((..&..))))))))))..))))-))))-))	AGAAAACAUCAGAGGCAGUGGGCUAU&AAAGUCCACUGCACCUGA-GUUU-CU	1	26.8255	4	0.994514	Output/S24h/cleaveLand_result/t_plot/PC-3p-122748_59_XM_016076238.2_1549_TPlot.pdf	0	0	NA	NA	NA	26.8255	0	Inf	up	2.2264e-07	2.57434e-07	yes	GO:1901360(organic cyclic compound metabolic process);GO:0006520(cellular amino acid metabolic process);GO:0044238(primary metabolic process);GO:0046483(heterocycle metabolic process);GO:0043170(macromolecule metabolic process);GO:0034641(cellular nitrogen compound metabolic process);GO:0043043(peptide biosynthetic process);GO:0032559(adenyl ribonucleotide binding);GO:0035639(purine ribonucleosid…	ko00970(Aminoacyl-tRNA biosynthesis)
PC-3p-122748_59	XM_016084744.2	2141	2164	2155	-43.4	-28.8	0.663594	8.5	4-13,2161-2152;15-17,2149-2147;19-24,2146-2141	1-3,2164-2162[UP5];14-14,2151-2150[AILt];18-18,x-x[BULq]	((((((-(((..((((((((((...&...))))))))))-.))).))))))	AGAGAC-CAGCAUGCAGUGGACAUC&AAAGUCCACUGCA-CCUGAGUUUCU	0	0	NA	NA	NA	1	33.3045	4	0.973688	Output/S8h/cleaveLand_result/t_plot/PC-3p-122748_59_XM_016084744.2_2155_TPlot.pdf	0	33.3045	-Inf	down	7.8779e-09	1.51467e-08	yes	GO:0043167(ion binding);GO:0046914(transition metal ion binding);GO:0005488(binding);GO:0043169(cation binding);GO:0046872(metal ion binding);GO:0008270(zinc ion binding)	NA
PC-3p-122748_59	XM_016085420.2	287	311	302	-43.4	-28.42	0.654839	10	3-11,309-301;15-24,296-287	1-2,311-310[UP5];12-14,300-297[AILt]	((((((((((....(((((((((..&..)))))))))-...))))))))))	GGGAACUCAGUACUCAGUGGACUCU&AAAGUCCACUG-CACCUGAGUUUCU	1	26.8255	4	0.994915	Output/S24h/cleaveLand_result/t_plot/PC-3p-122748_59_XM_016085420.2_302_TPlot.pdf	3	99.9134	2	0.780864	Output/S8h/cleaveLand_result/t_plot/PC-3p-122748_59_XM_016085420.2_302_TPlot.pdf	26.8255	99.9134	-1.89707	down	8.4486e-11	3.48434e-10	yes	GO:0016791(phosphatase activity);GO:0006793(phosphorus metabolic process);GO:0042578(phosphoric ester hydrolase activity);GO:0009987(cellular process);GO:0006796(phosphate-containing compound metabolic process);GO:0016311(dephosphorylation);GO:0003993(acid phosphatase activity);GO:0016787(hydrolase activity);GO:0008152(metabolic process);GO:0016788(hydrolase activity, acting on ester bonds);GO:00…	ko03010(Ribosome);ko04016(MAPK signaling pathway - plant)
PC-3p-122748_59	XM_016085708.2	1565	1591	1580	-43.4	-29	0.668203	11.5	3-3,1589-1589;5-8,1587-1584;9-13,1581-1577;14-23,1575-1566	1-2,1591-1590[UP5];4-4,1588-1588[SIL];x-x,1583-1582[BULt];x-x,1576-1576[BULt];24-24,1565-1565[UP3]	.((((((((((.(((((..((((.(..&..).))))--)))))-)))))))))).	UGAAGCUCAGGAUGCAGCAUGGAGUCC&AAAGUCCA--CUGCA-CCUGAGUUUCU	1	26.8255	4	0.984926	Output/S24h/cleaveLand_result/t_plot/PC-3p-122748_59_XM_016085708.2_1580_TPlot.pdf	0	0	NA	NA	NA	26.8255	0	Inf	up	2.2264e-07	2.57434e-07	yes	GO:0044260(cellular macromolecule metabolic process);GO:0006468(protein phosphorylation);GO:0051716(cellular response to stimulus);GO:0006796(phosphate-containing compound metabolic process);GO:0006464(cellular protein modification process);GO:0016310(phosphorylation);GO:0007154(cell communication);GO:0035639(purine ribonucleoside triphosphate binding);GO:0016772(transferase activity, transferrin…	NA
PC-3p-122748_59	XM_016090370.2	476	498	489	-43.4	-31.32	0.721659	5.5	2-15,497-484;20-24,480-476	1-1,498-498[UP5];16-19,483-481[AILq]	(((((...-((((((((((((((.&.))))))))))))))....)))))	AGAGAAAU-GGUGCAGUGGACUUA&AAAGUCCACUGCACCUGAGUUUCU	0	0	NA	NA	NA	3	99.9134	2	0.284032	Output/S8h/cleaveLand_result/t_plot/PC-3p-122748_59_XM_016090370.2_489_TPlot.pdf	0	99.9134	-Inf	down	1.5881e-23	2.78872e-22	yes	GO:1905368(peptidase complex);GO:0005623(cell);GO:0000502(proteasome complex);GO:0005622(intracellular);GO:0044464(cell part);GO:0043234(protein complex);GO:1902494(catalytic complex);GO:1905369(endopeptidase complex);GO:0044424(intracellular part);GO:0032991(macromolecular complex)	ko03050(Proteasome)
PC-3p-122748_59	XM_016102051.2	1421	1446	1436	-43.4	-29.02	0.668664	11.5	1-7,1446-1440;11-16,1435-1430;17-24,1428-1421	8-10,1439-1436[AILt];x-x,1429-1429[BULt]	((((((((.((((((....(((((((&)))))))-...))))))-))))))))	GGGAGCUCGAGGUGCUUCAGGGCUUU&AAAGUCC-ACUGCACCU-GAGUUUCU	2	53.6509	3	0.312086	Output/S24h/cleaveLand_result/t_plot/PC-3p-122748_59_XM_016102051.2_1436_TPlot.pdf	0	0	NA	NA	NA	53.6509	0	Inf	up	2.3929e-13	1.027e-12	yes	NA	NA
PC-3p-122748_59	XM_016103066.2	1237	1270	1261	-43.4	-30.4	0.700461	19	2-10,1269-1261;11-15,1253-1249;16-24,1245-1237	1-1,1270-1270[UP5];x-x,1260-1254[BULt];x-x,1248-1246[BULt]	(((((((((...(((((.......(((((((((.&.)))))))))-------)))))---)))))))))	GGGAACUCAAAUGGUGCUGUAAAUAGUGGACUUG&AAAGUCCACU-------GCACC---UGAGUUUCU	0	0	NA	NA	NA	1	33.3045	4	0.867473	Output/S8h/cleaveLand_result/t_plot/PC-3p-122748_59_XM_016103066.2_1261_TPlot.pdf	0	33.3045	-Inf	down	7.8779e-09	1.51467e-08	yes	GO:1901564(organonitrogen compound metabolic process);GO:0044260(cellular macromolecule metabolic process);GO:0043170(macromolecule metabolic process);GO:0044238(primary metabolic process);GO:0003824(catalytic activity);GO:0071840(cellular component organization or biogenesis);GO:0019538(protein metabolic process);GO:0006355(regulation of transcription, DNA-templated);GO:0043231(intracellular mem…	NA
PC-3p-122748_59	XM_016109888.2	1863	1885	1876	-43.4	-28.3	0.652074	11.5	4-12,1882-1874;14-16,1873-1871;18-23,1869-1864	1-3,1885-1883[UP5];13-13,x-x[BULq];17-17,1870-1870[SIL];24-24,1863-1863[UP3]	.((((((.(((-(((((((((...&...))))))))).))).)))))).	CGGGGCUGAGG-GCGGUGGAUGCA&AAAGUCCACUGCACCUGAGUUUCU	2	53.6509	2	0.870733	Output/S24h/cleaveLand_result/t_plot/PC-3p-122748_59_XM_016109888.2_1876_TPlot.pdf	0	0	NA	NA	NA	53.6509	0	Inf	up	2.3929e-13	1.027e-12	yes	GO:0008152(metabolic process);GO:0035639(purine ribonucleoside triphosphate binding);GO:0036211(protein modification process);GO:0036094(small molecule binding);GO:1901564(organonitrogen compound metabolic process);GO:0016773(phosphotransferase activity, alcohol group as acceptor);GO:0032553(ribonucleotide binding);GO:0006464(cellular protein modification process);GO:1901265(nucleoside phosphate …	NA
PC-3p-122748_59	XM_021129802.1	1153	1176	1167	-43.4	-30.7	0.707373	4	1-13,1176-1164;15-17,1161-1159;19-24,1158-1153	14-14,1163-1162[AILt];18-18,x-x[BULq]	((((((-(((..(((((((((((((&)))))))))))))-.))).))))))	AGGAGC-CAGAAUGCAGUGGACUUU&AAAGUCCACUGCA-CCUGAGUUUCU	1	26.8255	4	0.837881	Output/S24h/cleaveLand_result/t_plot/PC-3p-122748_59_XM_021129802.1_1167_TPlot.pdf	0	0	NA	NA	NA	26.8255	0	Inf	up	2.2264e-07	2.57434e-07	yes	GO:0006807(nitrogen compound metabolic process);GO:0003824(catalytic activity);GO:0005488(binding);GO:0043167(ion binding);GO:0006796(phosphate-containing compound metabolic process);GO:0009987(cellular process);GO:0036211(protein modification process);GO:1901564(organonitrogen compound metabolic process);GO:0042578(phosphoric ester hydrolase activity);GO:0006470(protein dephosphorylation);GO:004…	NA
PC-3p-122855_59	BGI_novel_T007684	1696	1719	1710	-35.8	-23.5	0.656425	16.5	8-22,1712-1698	1-7,1719-1713[UP5];23-24,1697-1696[UP3]	..(((((((((((((((.......&.......)))))))))))))))..	ACCAGGUUGUAUGGUCCUUGAGGC&AUAAAACGGACCAUACGAUUUGUA	0	0	NA	NA	NA	1	33.3045	4	0.72096	Output/S8h/cleaveLand_result/t_plot/PC-3p-122855_59_BGI_novel_T007684_1710_TPlot.pdf	0	33.3045	-Inf	down	7.8779e-09	1.51467e-08	yes	GO:0044237(cellular metabolic process);GO:0005623(cell);GO:0019219(regulation of nucleobase-containing compound metabolic process);GO:0043226(organelle);GO:0009719(response to endogenous stimulus);GO:0010556(regulation of macromolecule biosynthetic process);GO:0005634(nucleus);GO:0090304(nucleic acid metabolic process);GO:0043231(intracellular membrane-bounded organelle);GO:0050896(response to st…	ko04075(Plant hormone signal transduction)
PC-3p-122855_59	XM_016112870.2	1751	1774	1765	-35.8	-23.5	0.656425	16.5	8-22,1767-1753	1-7,1774-1768[UP5];23-24,1752-1751[UP3]	..(((((((((((((((.......&.......)))))))))))))))..	ACCAGGUUGUAUGGUCCUUGAGGC&AUAAAACGGACCAUACGAUUUGUA	0	0	NA	NA	NA	2	66.6089	1	0.0269702	Output/S8h/cleaveLand_result/t_plot/PC-3p-122855_59_XM_016112870.2_1765_TPlot.pdf	0	66.6089	-Inf	down	3.3071e-16	2.22267e-15	yes	GO:0044237(cellular metabolic process);GO:0005623(cell);GO:0019219(regulation of nucleobase-containing compound metabolic process);GO:0043226(organelle);GO:0009719(response to endogenous stimulus);GO:0010556(regulation of macromolecule biosynthetic process);GO:0005634(nucleus);GO:0090304(nucleic acid metabolic process);GO:0043231(intracellular membrane-bounded organelle);GO:0050896(response to st…	ko04075(Plant hormone signal transduction)
PC-3p-122855_59	XM_021126165.1	1764	1787	1778	-35.8	-23.5	0.656425	16.5	8-22,1780-1766	1-7,1787-1781[UP5];23-24,1765-1764[UP3]	..(((((((((((((((.......&.......)))))))))))))))..	ACCAGGUUGUAUGGUCCUUGAGGC&AUAAAACGGACCAUACGAUUUGUA	0	0	NA	NA	NA	1	33.3045	4	0.726834	Output/S8h/cleaveLand_result/t_plot/PC-3p-122855_59_XM_021126165.1_1778_TPlot.pdf	0	33.3045	-Inf	down	7.8779e-09	1.51467e-08	yes	GO:0044237(cellular metabolic process);GO:0005623(cell);GO:0019219(regulation of nucleobase-containing compound metabolic process);GO:0043226(organelle);GO:0009719(response to endogenous stimulus);GO:0010556(regulation of macromolecule biosynthetic process);GO:0005634(nucleus);GO:0090304(nucleic acid metabolic process);GO:0043231(intracellular membrane-bounded organelle);GO:0050896(response to st…	ko04075(Plant hormone signal transduction)
PC-3p-122855_59	XM_021139917.1	666	689	680	-35.8	-25.1	0.701117	5.5	1-21,689-669	22-24,668-666[UP3]	...(((((((((((((((((((((&)))))))))))))))))))))...	AGAAAAUUGUAUGGUUUGUUUUAU&AUAAAACGGACCAUACGAUUUGUA	0	0	NA	NA	NA	1	33.3045	4	0.332485	Output/S8h/cleaveLand_result/t_plot/PC-3p-122855_59_XM_021139917.1_680_TPlot.pdf	0	33.3045	-Inf	down	7.8779e-09	1.51467e-08	yes	NA	NA
PC-3p-12333_982	BGI_novel_T000740	3529	3553	3543	-42.7	-28.3	0.662763	9.5	3-4,3551-3550;5-12,3548-3541;14-16,3539-3537;18-24,3535-3529	1-2,3553-3552[UP5];x-x,3549-3549[BULt];13-13,3540-3540[SIL];17-17,3536-3536[SIL]	(((((((.(((.((((((((.((..&..))-)))))))).))).)))))))	UCAGCAAGUGAGGAAGCCCAUGCUA&UUGU-UGGGCUUUAUCAGUUGCUGG	0	0	NA	NA	NA	1	33.3045	4	0.99994	Output/S8h/cleaveLand_result/t_plot/PC-3p-12333_982_BGI_novel_T000740_3543_TPlot.pdf	0	33.3045	-Inf	down	7.8779e-09	1.51467e-08	yes	NA	ko04933(AGE-RAGE signaling pathway in diabetic complications)
PC-3p-12333_982	BGI_novel_T001906	1420	1444	1435	-42.7	-31.9	0.747073	7	1-9,1444-1436;12-16,1433-1429;18-24,1426-1420	10-11,1435-1434[SIL];17-17,1428-1427[AILt]	(((((((..(((((..(((((((((&)))))))))..)))))-.)))))))	CCAGCAGGAUGGUAUUGCCCAACAA&UUGUUGGGCUUUAUCA-GUUGCUGG	2	53.6509	1	0.0114016	Output/S24h/cleaveLand_result/t_plot/PC-3p-12333_982_BGI_novel_T001906_1435_TPlot.pdf	0	0	NA	NA	NA	53.6509	0	Inf	up	2.3929e-13	1.027e-12	yes	GO:0016887(ATPase activity);GO:0030554(adenyl nucleotide binding);GO:0005886(plasma membrane);GO:0016020(membrane);GO:0071944(cell periphery);GO:0016462(pyrophosphatase activity);GO:0044425(membrane part);GO:0016817(hydrolase activity, acting on acid anhydrides);GO:0043492(ATPase activity, coupled to movement of substances);GO:0005215(transporter activity);GO:0097159(organic cyclic compound bindi…	ko02010(ABC transporters)
PC-3p-12333_982	BGI_novel_T009373	1027	1052	1043	-42.7	-27.8	0.651054	7	1-5,1052-1048;7-15,1046-1038;17-24,1034-1027	6-6,1047-1047[SIL];16-16,1037-1035[AILt]	((((((((...(((((((((.(((((&))))).)))))))))--.))))))))	CUAGCAACAAAGAUAAAGCUGAACAG&UUGUUGGGCUUUAUC--AGUUGCUGG	2	53.6509	2	0.992484	Output/S24h/cleaveLand_result/t_plot/PC-3p-12333_982_BGI_novel_T009373_1043_TPlot.pdf	1	33.3045	4	0.999993	Output/S8h/cleaveLand_result/t_plot/PC-3p-12333_982_BGI_novel_T009373_1043_TPlot.pdf	53.6509	33.3045	0.687888	up	0.029111	0.0312173	yes	NA	ko00071(Fatty acid degradation);ko01100(Metabolic pathways);ko04146(Peroxisome);ko01212(Fatty acid metabolism);ko00061(Fatty acid biosynthesis)
PC-3p-12333_982	BGI_novel_T010672	3606	3628	3619	-42.7	-29.9	0.700234	7.5	1-11,3628-3618;13-24,3617-3606	12-12,x-x[BULq]	((((((((((((-(((((((((((&))))))))))).))))))))))))	CCGGCAACUGGU-AGGCCUAGUAG&UUGUUGGGCUUUAUCAGUUGCUGG	2	53.6509	2	0.756752	Output/S24h/cleaveLand_result/t_plot/PC-3p-12333_982_BGI_novel_T010672_3619_TPlot.pdf	0	0	NA	NA	NA	53.6509	0	Inf	up	2.3929e-13	1.027e-12	yes	GO:0005623(cell);GO:0060255(regulation of macromolecule metabolic process);GO:0019219(regulation of nucleobase-containing compound metabolic process);GO:0044260(cellular macromolecule metabolic process);GO:0050789(regulation of biological process);GO:0019538(protein metabolic process);GO:0005737(cytoplasm);GO:2000112(regulation of cellular macromolecule biosynthetic process);GO:0044444(cytoplasmi…	ko00480(Glutathione metabolism);ko04016(MAPK signaling pathway - plant);ko04075(Plant hormone signal transduction)
PC-3p-12333_982	BGI_novel_T011295	1022	1045	1036	-42.7	-28.8	0.674473	11	1-4,1045-1042;6-6,1040-1040;8-9,1038-1037;12-24,1034-1022	5-5,1041-1041[SIL];7-7,1039-1039[SIL];10-11,1036-1035[SIL]	(((((((((((((..((.(.((((&)))).).))..)))))))))))))	CCGGCGACUGGUACUGCGCCGCAG&UUGUUGGGCUUUAUCAGUUGCUGG	0	0	NA	NA	NA	1	33.3045	4	0.999322	Output/S8h/cleaveLand_result/t_plot/PC-3p-12333_982_BGI_novel_T011295_1036_TPlot.pdf	0	33.3045	-Inf	down	7.8779e-09	1.51467e-08	yes	GO:0046914(transition metal ion binding);GO:0008270(zinc ion binding);GO:0043169(cation binding);GO:0043167(ion binding);GO:0005488(binding);GO:0046872(metal ion binding)	ko03022(Basal transcription factors)
PC-3p-12333_982	XM_016077957.2	2854	2878	2868	-42.7	-28.76	0.673536	8	1-7,2878-2872;8-12,2870-2866;17-24,2861-2854	x-x,2871-2871[BULt];13-16,2865-2862[SIL]	((((((((....(((((.(((((((&)))))))-)))))....))))))))	CCAGCAACACCAGAAGCACCAGCAA&UUGUUGG-GCUUUAUCAGUUGCUGG	0	0	NA	NA	NA	1	33.3045	4	0.999364	Output/S8h/cleaveLand_result/t_plot/PC-3p-12333_982_XM_016077957.2_2868_TPlot.pdf	0	33.3045	-Inf	down	7.8779e-09	1.51467e-08	yes	GO:0032555(purine ribonucleotide binding);GO:1901265(nucleoside phosphate binding);GO:0043168(anion binding);GO:0005524(ATP binding);GO:0008152(metabolic process);GO:0030554(adenyl nucleotide binding);GO:0035639(purine ribonucleoside triphosphate binding);GO:0016628(oxidoreductase activity, acting on the CH-CH group of donors, NAD or NADP as acceptor);GO:0055114(oxidation-reduction process);GO:00…	NA
PC-3p-12333_982	XM_016082583.2	583	606	597	-42.7	-28.8	0.674473	11	1-4,606-603;6-6,601-601;8-9,599-598;12-24,595-583	5-5,602-602[SIL];7-7,600-600[SIL];10-11,597-596[SIL]	(((((((((((((..((.(.((((&)))).).))..)))))))))))))	CCGGCGACUGGUACUGCGCCGCAG&UUGUUGGGCUUUAUCAGUUGCUGG	2	53.6509	2	0.946748	Output/S24h/cleaveLand_result/t_plot/PC-3p-12333_982_XM_016082583.2_597_TPlot.pdf	0	0	NA	NA	NA	53.6509	0	Inf	up	2.3929e-13	1.027e-12	yes	GO:0046914(transition metal ion binding);GO:0008270(zinc ion binding);GO:0043169(cation binding);GO:0043167(ion binding);GO:0005488(binding);GO:0046872(metal ion binding)	ko03022(Basal transcription factors)
PC-3p-12333_982	XM_016083263.2	135	162	149	-42.7	-29.1	0.681499	12.5	1-6,162-157;7-15,152-144;17-24,142-135	x-x,156-153[BULt];16-16,143-143[SIL]	((((((((.(((((((((....((((((&))))))----))))))))).))))))))	CCAGCAACAGGUAGAGUCUUUGCAGCAA&UUGUUG----GGCUUUAUCAGUUGCUGG	0	0	NA	NA	NA	1	33.3045	4	0.997519	Output/S8h/cleaveLand_result/t_plot/PC-3p-12333_982_XM_016083263.2_149_TPlot.pdf	0	33.3045	-Inf	down	7.8779e-09	1.51467e-08	yes	NA	NA
PC-3p-12333_982	XM_016083797.2	438	464	455	-42.7	-30.3	0.709602	11.5	1-11,464-454;12-19,450-443;21-24,441-438	x-x,453-451[BULt];20-20,442-442[SIL]	((((.((((((((...(((((((((((&)))))))))))---)))))))).))))	CCAGGAGCUGGUGGACAGGUCCAACAG&UUGUUGGGCUU---UAUCAGUUGCUGG	1	26.8255	4	0.915958	Output/S24h/cleaveLand_result/t_plot/PC-3p-12333_982_XM_016083797.2_455_TPlot.pdf	3	99.9134	2	0.509249	Output/S8h/cleaveLand_result/t_plot/PC-3p-12333_982_XM_016083797.2_455_TPlot.pdf	26.8255	99.9134	-1.89707	down	8.4486e-11	3.48434e-10	yes	GO:0009719(response to endogenous stimulus);GO:0042221(response to chemical);GO:0009725(response to hormone);GO:0050896(response to stimulus);GO:0010033(response to organic substance);GO:0009733(response to auxin)	ko04075(Plant hormone signal transduction)
PC-3p-12333_982	XM_016086990.2	1618	1642	1633	-42.7	-28.8	0.674473	9	3-16,1640-1627;18-24,1624-1618	1-2,1642-1641[UP5];17-17,1626-1625[AILt]	(((((((..((((((((((((((..&..))))))))))))))-.)))))))	UCAGCAGGAUGAUAAGGCUCAGCCU&UUGUUGGGCUUUAUCA-GUUGCUGG	0	0	NA	NA	NA	2	66.6089	2	0.918397	Output/S8h/cleaveLand_result/t_plot/PC-3p-12333_982_XM_016086990.2_1633_TPlot.pdf	0	66.6089	-Inf	down	3.3071e-16	2.22267e-15	yes	GO:0032549(ribonucleoside binding);GO:1901265(nucleoside phosphate binding);GO:0017111(nucleoside-triphosphatase activity);GO:0036094(small molecule binding);GO:0044249(cellular biosynthetic process);GO:0044238(primary metabolic process);GO:1901564(organonitrogen compound metabolic process);GO:0017076(purine nucleotide binding);GO:0003924(GTPase activity);GO:1901363(heterocyclic compound binding)…	ko03013(RNA transport)
PC-3p-12333_982	XM_016089564.2	368	391	382	-42.7	-29.2	0.683841	6.5	2-12,390-380;15-20,377-372;23-24,369-368	1-1,391-391[UP5];13-14,379-378[SIL];21-22,371-370[SIL]	((..((((((..(((((((((((.&.)))))))))))..))))))..))	CCCUCAGCUGUGAAAGCCCAGCAU&UUGUUGGGCUUUAUCAGUUGCUGG	0	0	NA	NA	NA	1	33.3045	4	0.996658	Output/S8h/cleaveLand_result/t_plot/PC-3p-12333_982_XM_016089564.2_382_TPlot.pdf	0	33.3045	-Inf	down	7.8779e-09	1.51467e-08	yes	NA	NA
PC-3p-12333_982	XM_016089734.2	285	309	300	-42.7	-28.1	0.65808	8.5	3-16,307-294;18-21,292-289;22-24,287-285	1-2,309-308[UP5];17-17,293-293[SIL];x-x,288-288[BULt]	(((.((((.((((((((((((((..&..)))))))))))))).))))-)))	CUAUGUAGGUGAUGAAGCCCAAUCC&UUGUUGGGCUUUAUCAGUUGC-UGG	1	26.8255	4	0.999997	Output/S24h/cleaveLand_result/t_plot/PC-3p-12333_982_XM_016089734.2_300_TPlot.pdf	0	0	NA	NA	NA	26.8255	0	Inf	up	2.2264e-07	2.57434e-07	yes	GO:0005524(ATP binding);GO:0035639(purine ribonucleoside triphosphate binding);GO:0017076(purine nucleotide binding);GO:0032553(ribonucleotide binding);GO:0032555(purine ribonucleotide binding);GO:1901265(nucleoside phosphate binding);GO:0097367(carbohydrate derivative binding);GO:0097159(organic cyclic compound binding);GO:0005488(binding);GO:1901363(heterocyclic compound binding);GO:0043167(ion…	NA
PC-3p-12333_982	XM_016089735.2	333	357	348	-42.7	-28.1	0.65808	8.5	3-16,355-342;18-21,340-337;22-24,335-333	1-2,357-356[UP5];17-17,341-341[SIL];x-x,336-336[BULt]	(((.((((.((((((((((((((..&..)))))))))))))).))))-)))	CUAUGUAGGUGAUGAAGCCCAAUCC&UUGUUGGGCUUUAUCAGUUGC-UGG	1	26.8255	4	0.999997	Output/S24h/cleaveLand_result/t_plot/PC-3p-12333_982_XM_016089735.2_348_TPlot.pdf	0	0	NA	NA	NA	26.8255	0	Inf	up	2.2264e-07	2.57434e-07	yes	GO:0017076(purine nucleotide binding);GO:0000166(nucleotide binding);GO:1901363(heterocyclic compound binding);GO:0032553(ribonucleotide binding);GO:0043167(ion binding);GO:0030554(adenyl nucleotide binding);GO:0043168(anion binding);GO:0005488(binding);GO:1901265(nucleoside phosphate binding);GO:0097367(carbohydrate derivative binding);GO:0032559(adenyl ribonucleotide binding);GO:0036094(small m…	NA
PC-3p-12333_982	XM_016089736.2	335	359	350	-42.7	-28.1	0.65808	8.5	3-16,357-344;18-21,342-339;22-24,337-335	1-2,359-358[UP5];17-17,343-343[SIL];x-x,338-338[BULt]	(((.((((.((((((((((((((..&..)))))))))))))).))))-)))	CUAUGUAGGUGAUGAAGCCCAAUCC&UUGUUGGGCUUUAUCAGUUGC-UGG	1	26.8255	4	0.999997	Output/S24h/cleaveLand_result/t_plot/PC-3p-12333_982_XM_016089736.2_350_TPlot.pdf	0	0	NA	NA	NA	26.8255	0	Inf	up	2.2264e-07	2.57434e-07	yes	GO:0017076(purine nucleotide binding);GO:0000166(nucleotide binding);GO:1901363(heterocyclic compound binding);GO:0032553(ribonucleotide binding);GO:0043167(ion binding);GO:0030554(adenyl nucleotide binding);GO:0043168(anion binding);GO:0005488(binding);GO:1901265(nucleoside phosphate binding);GO:0097367(carbohydrate derivative binding);GO:0032559(adenyl ribonucleotide binding);GO:0036094(small m…	NA
PC-3p-12333_982	XM_016091379.2	3770	3797	3788	-42.7	-31.5	0.737705	7	1-12,3797-3786;14-18,3784-3780;19-23,3775-3771	13-13,3785-3785[SIL];x-x,3779-3776[BULt];24-24,3770-3770[UP3]	.(((((....(((((.((((((((((((&)))))))))))).)))))----))))).	ACAGCGUAAUGCUGAGAAAGCCCAACAA&UUGUUGGGCUUUAUCAGU----UGCUGG	1	26.8255	4	0.607407	Output/S24h/cleaveLand_result/t_plot/PC-3p-12333_982_XM_016091379.2_3788_TPlot.pdf	0	0	NA	NA	NA	26.8255	0	Inf	up	2.2264e-07	2.57434e-07	yes	GO:0016020(membrane);GO:0031224(intrinsic component of membrane);GO:0016021(integral component of membrane);GO:0044425(membrane part)	NA
PC-3p-12333_982	XM_016094040.2	604	626	618	-42.7	-30.8	0.721311	10	2-9,625-618;13-16,615-612;18-24,610-604	1-1,626-626[UP5];10-12,617-616[AILq];17-17,611-611[SIL]	(((((((.((((..-((((((((.&.))))))))...)))).)))))))	CCAGCGAGUGGUCC-GCCCAGCAG&UUGUUGGGCUUUAUCAGUUGCUGG	0	0	NA	NA	NA	1	33.3045	4	0.662078	Output/S8h/cleaveLand_result/t_plot/PC-3p-12333_982_XM_016094040.2_618_TPlot.pdf	0	33.3045	-Inf	down	7.8779e-09	1.51467e-08	yes	GO:0016616(oxidoreductase activity, acting on the CH-OH group of donors, NAD or NADP as acceptor);GO:0055114(oxidation-reduction process);GO:0008152(metabolic process);GO:0003824(catalytic activity);GO:0016614(oxidoreductase activity, acting on CH-OH group of donors);GO:0016491(oxidoreductase activity)	ko00053(Ascorbate and aldarate metabolism);ko01100(Metabolic pathways);ko01110(Biosynthesis of secondary metabolites)
PC-3p-12333_982	XM_016096751.2	1072	1100	1086	-42.7	-28.2	0.660422	15.5	2-7,1099-1094;8-19,1088-1077;21-24,1075-1072	1-1,1100-1100[UP5];x-x,1093-1089[BULt];20-20,1076-1076[SIL]	((((.((((((((((((.....((((((.&.))))))-----)))))))))))).))))	CCAGGAAUUGAUGAGGUUUGCUCCAACAC&UUGUUGG-----GCUUUAUCAGUUGCUGG	0	0	NA	NA	NA	1	33.3045	4	0.999962	Output/S8h/cleaveLand_result/t_plot/PC-3p-12333_982_XM_016096751.2_1086_TPlot.pdf	0	33.3045	-Inf	down	7.8779e-09	1.51467e-08	yes	GO:0072655(establishment of protein localization to mitochondrion);GO:0031224(intrinsic component of membrane);GO:0070727(cellular macromolecule localization);GO:0032555(purine ribonucleotide binding);GO:0006886(intracellular protein transport);GO:0043226(organelle);GO:1901265(nucleoside phosphate binding);GO:0044429(mitochondrial part);GO:0015031(protein transport);GO:0044237(cellular metabolic …	NA
PC-3p-12333_982	XM_016096813.2	308	333	324	-42.7	-28.7	0.672131	8	1-17,333-317;18-24,314-308	x-x,316-315[BULt]	(((((((..(((((((((((((((((&)))))))))))))))))--)))))))	UUAGCAAACUUGAUGAGGUCCAGCAG&UUGUUGGGCUUUAUCAG--UUGCUGG	0	0	NA	NA	NA	1	33.3045	4	0.999391	Output/S8h/cleaveLand_result/t_plot/PC-3p-12333_982_XM_016096813.2_324_TPlot.pdf	0	33.3045	-Inf	down	7.8779e-09	1.51467e-08	yes	GO:0016020(membrane);GO:0016021(integral component of membrane);GO:0044425(membrane part);GO:0031224(intrinsic component of membrane)	ko00051(Fructose and mannose metabolism);ko01230(Biosynthesis of amino acids);ko00030(Pentose phosphate pathway);ko01100(Metabolic pathways);ko01040(Biosynthesis of unsaturated fatty acids);ko01200(Carbon metabolism);ko01212(Fatty acid metabolism);ko01110(Biosynthesis of secondary metabolites);ko00052(Galactose metabolism);ko00062(Fatty acid elongation);ko03018(RNA degradation);ko00010(Glycolysis…
PC-3p-12333_982	XM_016097021.2	344	370	361	-42.7	-30.2	0.70726	10.5	2-5,369-366;7-18,364-353;19-23,349-345	1-1,370-370[UP5];6-6,365-365[SIL];x-x,352-350[BULt];24-24,344-344[UP3]	.(((((...((((((((((((.((((.&.)))).))))))))))))---))))).	ACAGCAUCAGCUGAUGAAGCUGAGCAU&UUGUUGGGCUUUAUCAGU---UGCUGG	1	26.8255	4	0.964407	Output/S24h/cleaveLand_result/t_plot/PC-3p-12333_982_XM_016097021.2_361_TPlot.pdf	0	0	NA	NA	NA	26.8255	0	Inf	up	2.2264e-07	2.57434e-07	yes	GO:0020037(heme binding);GO:0046906(tetrapyrrole binding);GO:0009055(electron transfer activity);GO:1901363(heterocyclic compound binding);GO:0005488(binding);GO:0097159(organic cyclic compound binding)	ko01100(Metabolic pathways);ko00190(Oxidative phosphorylation)
PC-3p-12333_982	XM_016098183.2	1113	1137	1128	-42.7	-32	0.749415	7.5	2-6,1136-1132;8-13,1130-1125;14-23,1123-1114	1-1,1137-1137[UP5];7-7,1131-1131[SIL];x-x,1124-1124[BULt];24-24,1113-1113[UP3]	.((((((((((.((((((.(((((.&.))))).))))))-)))))))))).	GCAGCAGCUGAUUAAGGCGCAGCAC&UUGUUGGGCUUUA-UCAGUUGCUGG	0	0	NA	NA	NA	1	33.3045	4	0.386937	Output/S8h/cleaveLand_result/t_plot/PC-3p-12333_982_XM_016098183.2_1128_TPlot.pdf	0	33.3045	-Inf	down	7.8779e-09	1.51467e-08	yes	NA	NA
PC-3p-12333_982	XM_016102403.2	1638	1663	1655	-42.7	-29.7	0.69555	8.5	1-8,1663-1656;10-18,1655-1647;19-23,1643-1639	9-9,x-x[BULq];x-x,1646-1644[BULt];24-24,1638-1638[UP3]	.(((((...(((((((((-((((((((&)))))))).)))))))))---))))).	GCAGCAUAUGCUGAUGAA-CCCAGCAA&UUGUUGGGCUUUAUCAGU---UGCUGG	1	26.8255	4	0.989418	Output/S24h/cleaveLand_result/t_plot/PC-3p-12333_982_XM_016102403.2_1655_TPlot.pdf	0	0	NA	NA	NA	26.8255	0	Inf	up	2.2264e-07	2.57434e-07	yes	GO:0030276(clathrin binding);GO:0030135(coated vesicle);GO:0005622(intracellular);GO:0070271(protein complex biogenesis);GO:0005737(cytoplasm);GO:0022607(cellular component assembly);GO:0006461(protein complex assembly);GO:0044464(cell part);GO:0005488(binding);GO:0043933(macromolecular complex subunit organization);GO:0044085(cellular component biogenesis);GO:0065003(macromolecular complex assem…	NA
PC-3p-12333_982	XM_016104994.2	601	623	615	-42.7	-29.5	0.690867	7.5	2-5,622-619;8-23,617-602	1-1,623-623[UP5];6-7,618-618[AILq];24-24,601-601[UP3]	.((((((((((((((((.-((((.&.))))..)))))))))))))))).	ACAGCAACUGGUAAAGCA-AGCAC&UUGUUGGGCUUUAUCAGUUGCUGG	1	26.8255	4	0.998195	Output/S24h/cleaveLand_result/t_plot/PC-3p-12333_982_XM_016104994.2_615_TPlot.pdf	0	0	NA	NA	NA	26.8255	0	Inf	up	2.2264e-07	2.57434e-07	yes	GO:0005488(binding);GO:1901363(heterocyclic compound binding);GO:0003676(nucleic acid binding);GO:0097159(organic cyclic compound binding)	ko03013(RNA transport);ko03008(Ribosome biogenesis in eukaryotes)
PC-3p-12333_982	XM_016104995.2	603	625	617	-42.7	-29.5	0.690867	7.5	2-5,624-621;8-23,619-604	1-1,625-625[UP5];6-7,620-620[AILq];24-24,603-603[UP3]	.((((((((((((((((.-((((.&.))))..)))))))))))))))).	ACAGCAACUGGUAAAGCA-AGCAC&UUGUUGGGCUUUAUCAGUUGCUGG	2	53.6509	2	0.889631	Output/S24h/cleaveLand_result/t_plot/PC-3p-12333_982_XM_016104995.2_617_TPlot.pdf	0	0	NA	NA	NA	53.6509	0	Inf	up	2.3929e-13	1.027e-12	yes	GO:0005488(binding);GO:1901363(heterocyclic compound binding);GO:0003676(nucleic acid binding);GO:0097159(organic cyclic compound binding)	ko03013(RNA transport);ko03008(Ribosome biogenesis in eukaryotes)
PC-3p-12333_982	XM_016107701.2	597	622	613	-42.7	-27.8	0.651054	7	1-5,622-618;7-15,616-608;17-24,604-597	6-6,617-617[SIL];16-16,607-605[AILt]	((((((((...(((((((((.(((((&))))).)))))))))--.))))))))	CUAGCAACAAAGAUAAAGCUGAACAG&UUGUUGGGCUUUAUC--AGUUGCUGG	2	53.6509	2	0.99287	Output/S24h/cleaveLand_result/t_plot/PC-3p-12333_982_XM_016107701.2_613_TPlot.pdf	0	0	NA	NA	NA	53.6509	0	Inf	up	2.3929e-13	1.027e-12	yes	NA	NA
PC-3p-12333_982	XM_016109399.2	510	533	524	-42.7	-27.9	0.653396	10	3-12,531-522;14-18,520-516;20-22,514-512	1-2,533-532[UP5];13-13,521-521[SIL];19-19,515-515[SIL];23-24,511-510[UP3]	..(((.(((((.((((((((((..&..)))))))))).))))).)))..	CAAGCUGCUGGCGAGGCCCAACGU&UUGUUGGGCUUUAUCAGUUGCUGG	0	0	NA	NA	NA	3	99.9134	2	0.981591	Output/S8h/cleaveLand_result/t_plot/PC-3p-12333_982_XM_016109399.2_524_TPlot.pdf	0	99.9134	-Inf	down	1.5881e-23	2.78872e-22	yes	GO:0005737(cytoplasm);GO:0006950(response to stress);GO:0008152(metabolic process);GO:0009987(cellular process);GO:0071704(organic substance metabolic process);GO:0006767(water-soluble vitamin metabolic process);GO:0019438(aromatic compound biosynthetic process);GO:0006725(cellular aromatic compound metabolic process);GO:0044446(intracellular organelle part);GO:0043227(membrane-bounded organelle)…	ko00730(Thiamine metabolism);ko01100(Metabolic pathways)
PC-3p-12333_982	XM_016111496.2	723	747	738	-42.7	-27.8	0.651054	7	2-2,746-746;4-14,744-734;17-18,731-730;19-24,728-723	1-1,747-747[UP5];3-3,745-745[SIL];15-16,733-732[SIL];x-x,729-729[BULt]	((((((.((..(((((((((((.(.&.).)))))))))))..))-))))))	CCAGCAGACCCAUGAAGCCCAAGAU&UUGUUGGGCUUUAUCAGU-UGCUGG	1	26.8255	4	0.999999	Output/S24h/cleaveLand_result/t_plot/PC-3p-12333_982_XM_016111496.2_738_TPlot.pdf	0	0	NA	NA	NA	26.8255	0	Inf	up	2.2264e-07	2.57434e-07	yes	GO:0016021(integral component of membrane);GO:0044425(membrane part);GO:0031224(intrinsic component of membrane);GO:0016020(membrane)	NA
PC-3p-12333_982	XM_016113065.2	1815	1837	1829	-42.7	-27.96	0.654801	12	2-9,1836-1829;17-24,1822-1815	1-1,1837-1837[UP5];10-16,1828-1823[AILq]	((((((((......-((((((((.&.)))))))).......))))))))	CCAGCAACAAUCUU-GCCCAGCAC&UUGUUGGGCUUUAUCAGUUGCUGG	1	26.8255	4	0.999999	Output/S24h/cleaveLand_result/t_plot/PC-3p-12333_982_XM_016113065.2_1829_TPlot.pdf	0	0	NA	NA	NA	26.8255	0	Inf	up	2.2264e-07	2.57434e-07	yes	NA	ko04136(Autophagy - other)
PC-3p-12333_982	XM_016114790.2	3512	3537	3529	-42.7	-29.42	0.688993	9.5	1-4,3537-3534;6-16,3533-3523;19-24,3517-3512	5-5,x-x[BULq];17-18,3522-3518[AILt]	((((((.....(((((((((((-((((&)))).)))))))))))---..))))))	CCGGCAGGGUGUGAUGAGGCCC-ACAA&UUGUUGGGCUUUAUCA---GUUGCUGG	1	26.8255	4	0.998327	Output/S24h/cleaveLand_result/t_plot/PC-3p-12333_982_XM_016114790.2_3529_TPlot.pdf	0	0	NA	NA	NA	26.8255	0	Inf	up	2.2264e-07	2.57434e-07	yes	GO:0006793(phosphorus metabolic process);GO:0043412(macromolecule modification);GO:1901265(nucleoside phosphate binding);GO:0000166(nucleotide binding);GO:0006468(protein phosphorylation);GO:0097367(carbohydrate derivative binding);GO:0016310(phosphorylation);GO:0016020(membrane);GO:0030554(adenyl nucleotide binding);GO:0016772(transferase activity, transferring phosphorus-containing groups);GO:0…	ko04626(Plant-pathogen interaction);ko04016(MAPK signaling pathway - plant)
PC-3p-12333_982	XM_016117396.2	1293	1314	1307	-42.7	-30	0.702576	11.5	2-8,1313-1307;12-24,1305-1293	1-1,1314-1314[UP5];9-11,1306-1306[AILq]	(((((((((((((.--(((((((.&.)))))))...)))))))))))))	CCGGCGGCUGAUGC--CCCGGCAG&UUGUUGGGCUUUAUCAGUUGCUGG	3	80.4764	3	0.312086	Output/S24h/cleaveLand_result/t_plot/PC-3p-12333_982_XM_016117396.2_1307_TPlot.pdf	2	66.6089	3	0.262213	Output/S8h/cleaveLand_result/t_plot/PC-3p-12333_982_XM_016117396.2_1307_TPlot.pdf	80.4764	66.6089	0.27285	up	0.25284	0.265574	yes	NA	NA
PC-3p-12333_982	XM_021127687.1	1359	1383	1373	-42.7	-30.2	0.70726	6	2-8,1382-1376;9-18,1374-1365;20-24,1363-1359	1-1,1383-1383[UP5];x-x,1375-1375[BULt];19-19,1364-1364[SIL]	(((((.((((((((((.(((((((.&.)))))))-)))))))))).)))))	CUGGUUGCUGAUAAAGUCCCAACAC&UUGUUGGG-CUUUAUCAGUUGCUGG	0	0	NA	NA	NA	1	33.3045	4	0.923776	Output/S8h/cleaveLand_result/t_plot/PC-3p-12333_982_XM_021127687.1_1373_TPlot.pdf	0	33.3045	-Inf	down	7.8779e-09	1.51467e-08	yes	GO:0016787(hydrolase activity);GO:0009251(glucan catabolic process);GO:0044238(primary metabolic process);GO:0004553(hydrolase activity, hydrolyzing O-glycosyl compounds);GO:0043170(macromolecule metabolic process);GO:0009056(catabolic process);GO:0008152(metabolic process);GO:0016052(carbohydrate catabolic process);GO:0009057(macromolecule catabolic process);GO:0005975(carbohydrate metabolic pro…	ko00940(Phenylpropanoid biosynthesis);ko01100(Metabolic pathways);ko00460(Cyanoamino acid metabolism);ko00500(Starch and sucrose metabolism);ko01110(Biosynthesis of secondary metabolites)
PC-3p-12333_982	XM_021131735.1	592	619	610	-42.7	-28.6	0.669789	11	3-17,617-603;18-24,598-592	1-2,619-618[UP5];x-x,602-599[BULt]	(((((((....(((((((((((((((..&..)))))))))))))))----)))))))	CCAGCAAUGCCCUGAUAAGGUUCAAUGG&UUGUUGGGCUUUAUCAG----UUGCUGG	2	53.6509	2	0.964443	Output/S24h/cleaveLand_result/t_plot/PC-3p-12333_982_XM_021131735.1_610_TPlot.pdf	0	0	NA	NA	NA	53.6509	0	Inf	up	2.3929e-13	1.027e-12	yes	GO:0003824(catalytic activity);GO:0016757(transferase activity, transferring glycosyl groups);GO:0016740(transferase activity)	ko00052(Galactose metabolism)
PC-3p-12333_982	XM_021137293.1	1051	1079	1065	-42.7	-28.2	0.660422	15.5	2-7,1078-1073;8-19,1067-1056;21-24,1054-1051	1-1,1079-1079[UP5];x-x,1072-1068[BULt];20-20,1055-1055[SIL]	((((.((((((((((((.....((((((.&.))))))-----)))))))))))).))))	CCAGGAAUUGAUGAGGUUUGCUCCAACAC&UUGUUGG-----GCUUUAUCAGUUGCUGG	0	0	NA	NA	NA	1	33.3045	4	0.999967	Output/S8h/cleaveLand_result/t_plot/PC-3p-12333_982_XM_021137293.1_1065_TPlot.pdf	0	33.3045	-Inf	down	7.8779e-09	1.51467e-08	yes	GO:0072655(establishment of protein localization to mitochondrion);GO:0031224(intrinsic component of membrane);GO:0070727(cellular macromolecule localization);GO:0032555(purine ribonucleotide binding);GO:0006886(intracellular protein transport);GO:0043226(organelle);GO:1901265(nucleoside phosphate binding);GO:0044429(mitochondrial part);GO:0015031(protein transport);GO:0044237(cellular metabolic …	NA
PC-3p-12333_982	XM_021137300.1	886	914	900	-42.7	-28.2	0.660422	15.5	2-7,913-908;8-19,902-891;21-24,889-886	1-1,914-914[UP5];x-x,907-903[BULt];20-20,890-890[SIL]	((((.((((((((((((.....((((((.&.))))))-----)))))))))))).))))	CCAGGAAUUGAUGAGGUUUGCUCCAACAC&UUGUUGG-----GCUUUAUCAGUUGCUGG	0	0	NA	NA	NA	1	33.3045	4	0.999953	Output/S8h/cleaveLand_result/t_plot/PC-3p-12333_982_XM_021137300.1_900_TPlot.pdf	0	33.3045	-Inf	down	7.8779e-09	1.51467e-08	yes	GO:0072655(establishment of protein localization to mitochondrion);GO:0031224(intrinsic component of membrane);GO:0070727(cellular macromolecule localization);GO:0032555(purine ribonucleotide binding);GO:0006886(intracellular protein transport);GO:0043226(organelle);GO:1901265(nucleoside phosphate binding);GO:0044429(mitochondrial part);GO:0015031(protein transport);GO:0044237(cellular metabolic …	NA
PC-3p-12333_982	XM_021142129.1	48	77	68	-42.7	-29.86	0.699297	12	1-15,77-63;17-24,55-48	16-16,62-56[AILt]	((((((((.......(((((((((((((((&)))))))))))))))------.))))))))	CCGGCGGCACGGUUCGGUGAAGCCUAACGA&UUGUUGGGCUUUAUC------AGUUGCUGG	1	26.8255	4	0.983323	Output/S24h/cleaveLand_result/t_plot/PC-3p-12333_982_XM_021142129.1_68_TPlot.pdf	0	0	NA	NA	NA	26.8255	0	Inf	up	2.2264e-07	2.57434e-07	yes	GO:0017076(purine nucleotide binding);GO:0032555(purine ribonucleotide binding);GO:0006796(phosphate-containing compound metabolic process);GO:0019538(protein metabolic process);GO:0036094(small molecule binding);GO:0000166(nucleotide binding);GO:0005524(ATP binding);GO:1901363(heterocyclic compound binding);GO:0016740(transferase activity);GO:0004674(protein serine/threonine kinase activity);GO:…	NA
PC-3p-12333_982	XM_021143003.1	274	297	288	-42.7	-28.2	0.660422	8	1-5,297-293;7-12,291-286;14-22,284-276	6-6,292-292[SIL];13-13,285-285[SIL];23-24,275-274[UP3]	..(((((((((.((((((.(((((&))))).)))))).)))))))))..	GAGGCAGCUGAAGAAGCUGAACAA&UUGUUGGGCUUUAUCAGUUGCUGG	0	0	NA	NA	NA	1	33.3045	4	0.999961	Output/S8h/cleaveLand_result/t_plot/PC-3p-12333_982_XM_021143003.1_288_TPlot.pdf	0	33.3045	-Inf	down	7.8779e-09	1.51467e-08	yes	GO:0005622(intracellular);GO:0009987(cellular process);GO:0003886(DNA (cytosine-5-)-methyltransferase activity);GO:0044238(primary metabolic process);GO:0006304(DNA modification);GO:0044237(cellular metabolic process);GO:0090116(C-5 methylation of cytosine);GO:0006305(DNA alkylation);GO:0003824(catalytic activity);GO:0006259(DNA metabolic process);GO:0005623(cell);GO:1901360(organic cyclic compou…	ko01100(Metabolic pathways);ko00270(Cysteine and methionine metabolism)
PC-3p-123460_58	BGI_novel_T005315	147	171	161	-38.7	-27	0.697674	15	6-8,166-164;10-22,161-149	1-5,171-167[UP5];9-9,163-162[AILt];23-24,148-147[UP3]	..(((((((((((((..(((.....&.....)))-.)))))))))))))..	UCUCAGACCCUCCGAACUUGAAGAA&AAAUACAA-AUCGGAGGGUCUGAUU	1	26.8255	4	0.695072	Output/S24h/cleaveLand_result/t_plot/PC-3p-123460_58_BGI_novel_T005315_161_TPlot.pdf	0	0	NA	NA	NA	26.8255	0	Inf	up	2.2264e-07	2.57434e-07	yes	GO:0050789(regulation of biological process);GO:0030234(enzyme regulator activity);GO:0006810(transport);GO:0060341(regulation of cellular localization);GO:0060589(nucleoside-triphosphatase regulator activity);GO:0044425(membrane part);GO:0048209(regulation of vesicle targeting, to, from or within Golgi);GO:0009306(protein secretion);GO:0016491(oxidoreductase activity);GO:0016628(oxidoreductase a…	ko04141(Protein processing in endoplasmic reticulum)
PC-3p-123460_58	BGI_novel_T006070	287	310	301	-38.7	-26.1	0.674419	8.5	1-10,310-301;12-14,299-297;16-22,295-289	11-11,300-300[SIL];15-15,296-296[SIL];23-24,288-287[UP3]	..(((((((.(((.((((((((((&)))))))))).))).)))))))..	GCUCAGGCCGUCUUGUUUGUGUUU&AAAUACAAAUCGGAGGGUCUGAUU	0	0	NA	NA	NA	1	33.3045	4	0.714961	Output/S8h/cleaveLand_result/t_plot/PC-3p-123460_58_BGI_novel_T006070_301_TPlot.pdf	0	33.3045	-Inf	down	7.8779e-09	1.51467e-08	yes	GO:0071556(integral component of lumenal side of endoplasmic reticulum membrane);GO:0006518(peptide metabolic process);GO:0098827(endoplasmic reticulum subcompartment);GO:0097708(intracellular vesicle);GO:0043603(cellular amide metabolic process);GO:0004175(endopeptidase activity);GO:0016787(hydrolase activity);GO:0031984(organelle subcompartment);GO:0098553(lumenal side of endoplasmic reticulum …	NA
PC-3p-123460_58	XM_016117292.2	1880	1903	1894	-38.7	-25.5	0.658915	14.5	6-8,1898-1896;10-21,1894-1883	1-5,1903-1899[UP5];9-9,1895-1895[SIL];22-24,1882-1880[UP3]	...((((((((((((.(((.....&.....))).))))))))))))...	AUCCAGAUCCUCCGAGUUGGACAG&AAAUACAAAUCGGAGGGUCUGAUU	0	0	NA	NA	NA	2	66.6089	2	0.45276	Output/S8h/cleaveLand_result/t_plot/PC-3p-123460_58_XM_016117292.2_1894_TPlot.pdf	0	66.6089	-Inf	down	3.3071e-16	2.22267e-15	yes	GO:0016020(membrane);GO:0016021(integral component of membrane);GO:0031224(intrinsic component of membrane);GO:0044425(membrane part)	ko01100(Metabolic pathways);ko00600(Sphingolipid metabolism)
PC-3p-124350_58	BGI_novel_T003600	789	811	802	-36.6	-25.8	0.704918	8	4-12,808-800;14-19,799-794;21-24,792-789	1-3,811-809[UP5];13-13,x-x[BULq];20-20,793-793[SIL]	((((.((((((-(((((((((...&...))))))))).)))))).))))	GGUAUAUCCGC-AUCCGAUCUCAG&AUAAGAUCGGAUUGUGGAUUUAUC	0	0	NA	NA	NA	1	33.3045	4	0.208644	Output/S8h/cleaveLand_result/t_plot/PC-3p-124350_58_BGI_novel_T003600_802_TPlot.pdf	0	33.3045	-Inf	down	7.8779e-09	1.51467e-08	yes	NA	ko03420(Nucleotide excision repair);ko03430(Mismatch repair);ko03030(DNA replication);ko03440(Homologous recombination)
PC-3p-124350_58	BGI_novel_T003932	204	226	217	-36.6	-24.3	0.663934	9.5	4-12,223-215;14-22,214-206	1-3,226-224[UP5];13-13,x-x[BULq];23-24,205-204[UP3]	..(((((((((-(((((((((...&...))))))))).)))))))))..	UCUGAAUCCAC-AUCUGAUCUAAG&AUAAGAUCGGAUUGUGGAUUUAUC	0	0	NA	NA	NA	1	33.3045	4	0.696176	Output/S8h/cleaveLand_result/t_plot/PC-3p-124350_58_BGI_novel_T003932_217_TPlot.pdf	0	33.3045	-Inf	down	7.8779e-09	1.51467e-08	yes	NA	NA
PC-3p-124350_58	XM_016082326.1	297	321	312	-36.6	-24.6	0.672131	13	7-21,315-301;23-24,298-297	1-6,321-316[UP5];22-22,300-299[AILt]	((..(((((((((((((((......&......)))))))))))))))-.))	GAGCAAAUCCACAAUCCGAACACCU&AUAAGAUCGGAUUGUGGAUUU-AUC	0	0	NA	NA	NA	1	33.3045	4	0.607817	Output/S8h/cleaveLand_result/t_plot/PC-3p-124350_58_XM_016082326.1_312_TPlot.pdf	0	33.3045	-Inf	down	7.8779e-09	1.51467e-08	yes	NA	NA
PC-3p-124350_58	XM_016088092.2	300	323	314	-36.6	-24.4	0.666667	12.5	5-21,319-303;24-24,300-300	1-4,323-320[UP5];22-23,302-301[SIL]	(..(((((((((((((((((....&....)))))))))))))))))..)	GUGAGGUCCACGGUUCGAUCCCAC&AUAAGAUCGGAUUGUGGAUUUAUC	0	0	NA	NA	NA	1	33.3045	4	0.654813	Output/S8h/cleaveLand_result/t_plot/PC-3p-124350_58_XM_016088092.2_314_TPlot.pdf	0	33.3045	-Inf	down	7.8779e-09	1.51467e-08	yes	GO:0046872(metal ion binding);GO:0009636(response to toxic substance);GO:0006979(response to oxidative stress);GO:0009664(plant-type cell wall organization);GO:0042743(hydrogen peroxide metabolic process);GO:0005488(binding);GO:0050896(response to stimulus);GO:0005618(cell wall);GO:0009505(plant-type cell wall);GO:0016043(cellular component organization);GO:0071554(cell wall organization or bioge…	ko00940(Phenylpropanoid biosynthesis);ko01100(Metabolic pathways);ko01110(Biosynthesis of secondary metabolites)
PC-3p-124350_58	XM_016092863.2	534	560	551	-36.6	-24.3	0.663934	15	4-12,557-549;13-21,545-537	1-3,560-558[UP5];x-x,548-546[BULt];22-24,536-534[UP3]	...(((((((((...(((((((((...&...)))))))))---)))))))))...	UCCAAGUCCGCAAUCAUCCGAUCUACA&AUAAGAUCGGAU---UGUGGAUUUAUC	3	80.4764	2	0.449583	Output/S24h/cleaveLand_result/t_plot/PC-3p-124350_58_XM_016092863.2_551_TPlot.pdf	5	166.522	2	0.389768	Output/S8h/cleaveLand_result/t_plot/PC-3p-124350_58_XM_016092863.2_551_TPlot.pdf	80.4764	166.522	-1.04908	down	4.3671e-08	8.37623e-08	yes	NA	NA
PC-3p-124350_58	XM_021125692.1	1934	1957	1948	-36.6	-24.2	0.661202	11.5	4-6,1954-1952;8-11,1950-1947;13-24,1945-1934	1-3,1957-1955[UP5];7-7,1951-1951[SIL];12-12,1946-1946[SIL]	((((((((((((.((((.(((...&...))).)))).))))))))))))	GGUGGAUCCACAUUCUGUUCUCCA&AUAAGAUCGGAUUGUGGAUUUAUC	1	26.8255	4	0.889027	Output/S24h/cleaveLand_result/t_plot/PC-3p-124350_58_XM_021125692.1_1948_TPlot.pdf	0	0	NA	NA	NA	26.8255	0	Inf	up	2.2264e-07	2.57434e-07	yes	GO:0043226(organelle);GO:0005488(binding);GO:0007017(microtubule-based process);GO:1901363(heterocyclic compound binding);GO:0017111(nucleoside-triphosphatase activity);GO:0016787(hydrolase activity);GO:0005623(cell);GO:0031122(cytoplasmic microtubule organization);GO:0097435(supramolecular fiber organization);GO:0006996(organelle organization);GO:0000166(nucleotide binding);GO:1901265(nucleoside…	ko03013(RNA transport)
PC-3p-124677_58	BGI_novel_T000725	394	416	408	-43.7	-31.7	0.7254	7	2-6,415-411;8-12,410-406;15-24,403-394	1-1,416-416[UP5];7-7,x-x[BULq];13-14,405-404[SIL]	((((((((((..(((((-(((((.&.))))).)))))..))))))))))	GGUGCAGGAAGAGGAGC-UCCGAA&AUCGGACGUUCCGAUUUCUGUACC	1	26.8255	4	0.0730071	Output/S24h/cleaveLand_result/t_plot/PC-3p-124677_58_BGI_novel_T000725_408_TPlot.pdf	0	0	NA	NA	NA	26.8255	0	Inf	up	2.2264e-07	2.57434e-07	yes	GO:0006725(cellular aromatic compound metabolic process);GO:0000166(nucleotide binding);GO:0097367(carbohydrate derivative binding);GO:0043168(anion binding);GO:0008026(ATP-dependent helicase activity);GO:0044428(nuclear part);GO:0070035(purine NTP-dependent helicase activity);GO:0043170(macromolecule metabolic process);GO:0032553(ribonucleotide binding);GO:0043233(organelle lumen);GO:0016787(hyd…	ko03040(Spliceosome)
PC-3p-124677_58	BGI_novel_T000726	394	416	408	-43.7	-31.7	0.7254	7	2-6,415-411;8-12,410-406;15-24,403-394	1-1,416-416[UP5];7-7,x-x[BULq];13-14,405-404[SIL]	((((((((((..(((((-(((((.&.))))).)))))..))))))))))	GGUGCAGGAAGAGGAGC-UCCGAA&AUCGGACGUUCCGAUUUCUGUACC	1	26.8255	4	0.140684	Output/S24h/cleaveLand_result/t_plot/PC-3p-124677_58_BGI_novel_T000726_408_TPlot.pdf	0	0	NA	NA	NA	26.8255	0	Inf	up	2.2264e-07	2.57434e-07	yes	GO:0006725(cellular aromatic compound metabolic process);GO:0000166(nucleotide binding);GO:0097367(carbohydrate derivative binding);GO:0043168(anion binding);GO:0008026(ATP-dependent helicase activity);GO:0044428(nuclear part);GO:0070035(purine NTP-dependent helicase activity);GO:0043170(macromolecule metabolic process);GO:0032553(ribonucleotide binding);GO:0043233(organelle lumen);GO:0016787(hyd…	ko03040(Spliceosome)
PC-3p-124677_58	XM_016092951.2	4410	4431	4422	-43.7	-29.6	0.677346	8	2-4,4430-4428;7-12,4425-4420;15-24,4419-4410	1-1,4431-4431[UP5];5-6,4427-4426[SIL];13-14,x-x[BULq]	((((((((((--((((((..(((.&.)))..))))))..))))))))))	GGUGCAGAAG--GGAACGGACGAG&AUCGGACGUUCCGAUUUCUGUACC	1	26.8255	4	0.349222	Output/S24h/cleaveLand_result/t_plot/PC-3p-124677_58_XM_016092951.2_4422_TPlot.pdf	3	99.9134	2	0.11616	Output/S8h/cleaveLand_result/t_plot/PC-3p-124677_58_XM_016092951.2_4422_TPlot.pdf	26.8255	99.9134	-1.89707	down	8.4486e-11	3.48434e-10	yes	GO:0005515(protein binding);GO:0016772(transferase activity, transferring phosphorus-containing groups);GO:0003779(actin binding);GO:0006796(phosphate-containing compound metabolic process);GO:0009987(cellular process);GO:0016740(transferase activity);GO:0016301(kinase activity);GO:0016310(phosphorylation);GO:0006793(phosphorus metabolic process);GO:0003824(catalytic activity);GO:0005488(binding)…	NA
PC-3p-124677_58	XM_016093018.2	666	692	682	-43.7	-28.5	0.652174	8	2-8,691-685;9-16,683-676;17-21,674-670;22-24,668-666	1-1,692-692[UP5];x-x,684-684[BULt];x-x,675-675[BULt];x-x,669-669[BULt]	(((.(((((.((((((((.(((((((.&.)))))))-))))))))-)))))-)))	GGUCACAGAUAAUCGGGAGUGUCUGAA&AUCGGACG-UUCCGAUU-UCUGU-ACC	1	26.8255	4	0.864165	Output/S24h/cleaveLand_result/t_plot/PC-3p-124677_58_XM_016093018.2_682_TPlot.pdf	0	0	NA	NA	NA	26.8255	0	Inf	up	2.2264e-07	2.57434e-07	yes	GO:0051649(establishment of localization in cell);GO:0005622(intracellular);GO:0005623(cell);GO:0010605(negative regulation of macromolecule metabolic process);GO:0051172(negative regulation of nitrogen compound metabolic process);GO:0070727(cellular macromolecule localization);GO:0065007(biological regulation);GO:0006612(protein targeting to membrane);GO:0070972(protein localization to endoplasm…	ko03060(Protein export)
PC-3p-124677_58	XM_016093019.2	534	560	550	-43.7	-28.5	0.652174	8	2-8,559-553;9-16,551-544;17-21,542-538;22-24,536-534	1-1,560-560[UP5];x-x,552-552[BULt];x-x,543-543[BULt];x-x,537-537[BULt]	(((.(((((.((((((((.(((((((.&.)))))))-))))))))-)))))-)))	GGUCACAGAUAAUCGGGAGUGUCUGAA&AUCGGACG-UUCCGAUU-UCUGU-ACC	1	26.8255	4	0.867554	Output/S24h/cleaveLand_result/t_plot/PC-3p-124677_58_XM_016093019.2_550_TPlot.pdf	0	0	NA	NA	NA	26.8255	0	Inf	up	2.2264e-07	2.57434e-07	yes	GO:0051649(establishment of localization in cell);GO:0005622(intracellular);GO:0005623(cell);GO:0010605(negative regulation of macromolecule metabolic process);GO:0051172(negative regulation of nitrogen compound metabolic process);GO:0070727(cellular macromolecule localization);GO:0065007(biological regulation);GO:0006612(protein targeting to membrane);GO:0070972(protein localization to endoplasm…	ko03060(Protein export)
PC-3p-124677_58	XM_016108371.2	1505	1536	1527	-43.7	-28.6	0.654462	14	2-3,1535-1534;5-15,1532-1522;16-24,1513-1505	1-1,1536-1536[UP5];4-4,1533-1533[SIL];x-x,1521-1514[BULt]	(((((((((........(((((((((((.((.&.)).)))))))))))--------)))))))))	GGUACAGGGUGGUUAUUAUCGGAAUGUUGGAA&AUCGGACGUUCCGAU--------UUCUGUACC	0	0	NA	NA	NA	1	33.3045	4	0.764628	Output/S8h/cleaveLand_result/t_plot/PC-3p-124677_58_XM_016108371.2_1527_TPlot.pdf	0	33.3045	-Inf	down	7.8779e-09	1.51467e-08	yes	GO:0006820(anion transport);GO:0051234(establishment of localization);GO:0015098(molybdate ion transmembrane transporter activity);GO:0022857(transmembrane transporter activity);GO:0051179(localization);GO:0008509(anion transmembrane transporter activity);GO:0006811(ion transport);GO:0015075(ion transmembrane transporter activity);GO:0031224(intrinsic component of membrane);GO:0015698(inorganic a…	NA
PC-3p-127107_56	BGI_novel_T000220	1878	1898	1889	-36.6	-27.1	0.740437	11	6-20,1893-1879	1-5,1898-1894[UP5];21-21,1878-1878[UP3]	.(((((((((((((((.....&.....))))))))))))))).	AAUGGUUCCAAGGUUCAAAAU&UCUAAGAGCCUUGGAACCAUA	0	0	NA	NA	NA	3	99.9134	2	0.357938	Output/S8h/cleaveLand_result/t_plot/PC-3p-127107_56_BGI_novel_T000220_1889_TPlot.pdf	0	99.9134	-Inf	down	1.5881e-23	2.78872e-22	yes	GO:0016705(oxidoreductase activity, acting on paired donors, with incorporation or reduction of molecular oxygen);GO:0046872(metal ion binding);GO:0043167(ion binding);GO:0016021(integral component of membrane);GO:0046906(tetrapyrrole binding);GO:0008152(metabolic process);GO:0016020(membrane);GO:0044425(membrane part);GO:0031224(intrinsic component of membrane);GO:0004497(monooxygenase activity)…	ko00906(Carotenoid biosynthesis)
PC-3p-127107_56	BGI_novel_T007530	731	751	743	-36.6	-23.9	0.653005	5.5	1-4,751-748;6-15,747-738;16-21,736-731	5-5,x-x[BULq];x-x,737-737[BULt]	((((((.((((((((((-((((&)))).))))))))))-))))))	UAUGGUGUUCAAGGUUC-UGGA&UCUAAGAGCCUUGGA-ACCAUA	1	26.8255	4	1	Output/S24h/cleaveLand_result/t_plot/PC-3p-127107_56_BGI_novel_T007530_743_TPlot.pdf	0	0	NA	NA	NA	26.8255	0	Inf	up	2.2264e-07	2.57434e-07	yes	GO:0043226(organelle);GO:1901360(organic cyclic compound metabolic process);GO:0043170(macromolecule metabolic process);GO:0036094(small molecule binding);GO:0097159(organic cyclic compound binding);GO:0005488(binding);GO:0050794(regulation of cellular process);GO:0016070(RNA metabolic process);GO:0044238(primary metabolic process);GO:1901363(heterocyclic compound binding);GO:0044260(cellular mac…	NA
PC-3p-127107_56	BGI_novel_T008808	559	581	571	-36.6	-24.6	0.672131	8	1-2,581-580;3-16,578-565;17-18,563-562	x-x,579-579[BULt];x-x,564-564[BULt];19-21,561-559[UP3]	...((.((((((((((((((.((&))-))))))))))))))-))...	UAAGGUUUCCAAGGUUCUUGUGA&UC-UAAGAGCCUUGGAA-CCAUA	0	0	NA	NA	NA	1	33.3045	4	0.999006	Output/S8h/cleaveLand_result/t_plot/PC-3p-127107_56_BGI_novel_T008808_571_TPlot.pdf	0	33.3045	-Inf	down	7.8779e-09	1.51467e-08	yes	GO:0006351(transcription, DNA-templated);GO:0071704(organic substance metabolic process);GO:0009058(biosynthetic process);GO:0043226(organelle);GO:0034654(nucleobase-containing compound biosynthetic process);GO:0032774(RNA biosynthetic process);GO:0003700(DNA binding transcription factor activity);GO:0043229(intracellular organelle);GO:0006725(cellular aromatic compound metabolic process);GO:0009…	ko04626(Plant-pathogen interaction);ko04016(MAPK signaling pathway - plant)
PC-3p-127107_56	BGI_novel_T008904	2588	2611	2599	-36.6	-26.3	0.718579	11	1-3,2611-2609;4-6,2604-2602;8-20,2601-2589	x-x,2608-2605[BULt];7-7,x-x[BULq];21-21,2588-2588[UP3]	.(((((((((((((-(((....(((&)))----))).))))))))))))).	GAUGGUUCCAAGGC-CUUCCCAAGA&UCU----AAGAGCCUUGGAACCAUA	4	107.302	2	0.584411	Output/S24h/cleaveLand_result/t_plot/PC-3p-127107_56_BGI_novel_T008904_2599_TPlot.pdf	2	66.6089	2	0.516327	Output/S8h/cleaveLand_result/t_plot/PC-3p-127107_56_BGI_novel_T008904_2599_TPlot.pdf	107.302	66.6089	0.687888	up	0.0020297	0.0022316	yes	NA	NA
PC-3p-127107_56	BGI_novel_T010547	1502	1523	1514	-36.6	-24.5	0.669399	5	1-12,1523-1512;14-17,1509-1506;19-21,1504-1502	13-13,1511-1510[AILt];18-18,1505-1505[SIL]	(((.((((..((((((((((((&))))))))))))-.)))).)))	UAUAGUUCUGGAGGCUCUUAGA&UCUAAGAGCCUU-GGAACCAUA	0	0	NA	NA	NA	1	33.3045	4	0.999507	Output/S8h/cleaveLand_result/t_plot/PC-3p-127107_56_BGI_novel_T010547_1514_TPlot.pdf	0	33.3045	-Inf	down	7.8779e-09	1.51467e-08	yes	GO:0009987(cellular process);GO:0015301(anion:anion antiporter activity);GO:0006839(mitochondrial transport);GO:0005623(cell);GO:0022804(active transmembrane transporter activity);GO:0031966(mitochondrial membrane);GO:0008509(anion transmembrane transporter activity);GO:0031967(organelle envelope);GO:0005743(mitochondrial inner membrane);GO:0051649(establishment of localization in cell);GO:007184…	NA
PC-3p-127107_56	BGI_novel_T011035	938	959	950	-36.6	-24.3	0.663934	6.5	1-5,959-955;7-14,953-946;15-18,944-941	6-6,954-954[SIL];x-x,945-945[BULt];19-21,940-938[UP3]	...((((.((((((((.(((((&))))).))))))))-))))...	CGGGGUUAUCAAGGCUGUUAGA&UCUAAGAGCCUUGG-AACCAUA	1	26.8255	4	0.999978	Output/S24h/cleaveLand_result/t_plot/PC-3p-127107_56_BGI_novel_T011035_950_TPlot.pdf	0	0	NA	NA	NA	26.8255	0	Inf	up	2.2264e-07	2.57434e-07	yes	GO:1901265(nucleoside phosphate binding);GO:1901363(heterocyclic compound binding);GO:0043168(anion binding);GO:0015399(primary active transmembrane transporter activity);GO:0016462(pyrophosphatase activity);GO:0022804(active transmembrane transporter activity);GO:0005524(ATP binding);GO:0042623(ATPase activity, coupled);GO:0003824(catalytic activity);GO:0016887(ATPase activity);GO:0042910(xenobi…	ko00920(Sulfur metabolism);ko02010(ABC transporters);ko03018(RNA degradation)
PC-3p-127107_56	BGI_novel_T011833	744	764	755	-36.6	-23.9	0.653005	10.5	5-19,760-746	1-4,764-761[UP5];20-21,745-744[UP3]	..(((((((((((((((....&....)))))))))))))))..	CCUGGUUUCAAGGCUUUGUUU&UCUAAGAGCCUUGGAACCAUA	0	0	NA	NA	NA	1	33.3045	4	0.999997	Output/S8h/cleaveLand_result/t_plot/PC-3p-127107_56_BGI_novel_T011833_755_TPlot.pdf	0	33.3045	-Inf	down	7.8779e-09	1.51467e-08	yes	NA	NA
PC-3p-127107_56	XM_016077050.2	1586	1605	1597	-36.6	-25.3	0.691257	6	1-9,1605-1597;11-14,1596-1593;17-21,1590-1586	10-10,x-x[BULq];15-16,1592-1591[SIL]	(((((..((((-(((((((((&))))))))).))))..)))))	UAUGGGACCGA-GCUCUUGGA&UCUAAGAGCCUUGGAACCAUA	1	26.8255	4	0.992381	Output/S24h/cleaveLand_result/t_plot/PC-3p-127107_56_XM_016077050.2_1597_TPlot.pdf	0	0	NA	NA	NA	26.8255	0	Inf	up	2.2264e-07	2.57434e-07	yes	GO:0044237(cellular metabolic process);GO:0006099(tricarboxylic acid cycle);GO:0019752(carboxylic acid metabolic process);GO:0016740(transferase activity);GO:0072350(tricarboxylic acid metabolic process);GO:0046912(transferase activity, transferring acyl groups, acyl groups converted into alkyl on transfer);GO:0071704(organic substance metabolic process);GO:0044238(primary metabolic process);GO:0…	ko01210(2-Oxocarboxylic acid metabolism);ko00020(Citrate cycle (TCA cycle));ko01200(Carbon metabolism);ko01230(Biosynthesis of amino acids);ko01110(Biosynthesis of secondary metabolites);ko01100(Metabolic pathways);ko00630(Glyoxylate and dicarboxylate metabolism)
PC-3p-127107_56	XM_016077051.2	1664	1683	1675	-36.6	-25.3	0.691257	6	1-9,1683-1675;11-14,1674-1671;17-21,1668-1664	10-10,x-x[BULq];15-16,1670-1669[SIL]	(((((..((((-(((((((((&))))))))).))))..)))))	UAUGGGACCGA-GCUCUUGGA&UCUAAGAGCCUUGGAACCAUA	0	0	NA	NA	NA	1	33.3045	4	0.982806	Output/S8h/cleaveLand_result/t_plot/PC-3p-127107_56_XM_016077051.2_1675_TPlot.pdf	0	33.3045	-Inf	down	7.8779e-09	1.51467e-08	yes	GO:0044237(cellular metabolic process);GO:0006099(tricarboxylic acid cycle);GO:0019752(carboxylic acid metabolic process);GO:0016740(transferase activity);GO:0072350(tricarboxylic acid metabolic process);GO:0046912(transferase activity, transferring acyl groups, acyl groups converted into alkyl on transfer);GO:0071704(organic substance metabolic process);GO:0044238(primary metabolic process);GO:0…	ko01210(2-Oxocarboxylic acid metabolism);ko00020(Citrate cycle (TCA cycle));ko01200(Carbon metabolism);ko01230(Biosynthesis of amino acids);ko01110(Biosynthesis of secondary metabolites);ko01100(Metabolic pathways);ko00630(Glyoxylate and dicarboxylate metabolism)
PC-3p-127107_56	XM_016078484.2	1117	1137	1128	-36.6	-25.9	0.70765	7	1-3,1137-1135;6-15,1132-1123;17-21,1121-1117	4-5,1134-1133[SIL];16-16,1122-1122[SIL]	(((((.((((((((((..(((&)))..)))))))))).)))))	UGUGGAUCCAAGGCUUGAAGG&UCUAAGAGCCUUGGAACCAUA	2	53.6509	3	0.258271	Output/S24h/cleaveLand_result/t_plot/PC-3p-127107_56_XM_016078484.2_1128_TPlot.pdf	3	99.9134	2	0.578675	Output/S8h/cleaveLand_result/t_plot/PC-3p-127107_56_XM_016078484.2_1128_TPlot.pdf	53.6509	99.9134	-0.897075	down	0.00018894	0.000209725	yes	GO:0044260(cellular macromolecule metabolic process);GO:0008152(metabolic process);GO:0016740(transferase activity);GO:0032555(purine ribonucleotide binding);GO:0016773(phosphotransferase activity, alcohol group as acceptor);GO:0038023(signaling receptor activity);GO:1901363(heterocyclic compound binding);GO:0032553(ribonucleotide binding);GO:0005488(binding);GO:0043168(anion binding);GO:0004871(…	NA
PC-3p-127107_56	XM_016079164.2	2090	2110	2101	-36.6	-25.98	0.709836	8.5	1-3,2110-2108;7-21,2104-2090	4-6,2107-2105[SIL]	(((((((((((((((...(((&)))...)))))))))))))))	UAUGGUUCUAGGGCUGAAGGA&UCUAAGAGCCUUGGAACCAUA	0	0	NA	NA	NA	1	33.3045	4	0.917006	Output/S8h/cleaveLand_result/t_plot/PC-3p-127107_56_XM_016079164.2_2101_TPlot.pdf	0	33.3045	-Inf	down	7.8779e-09	1.51467e-08	yes	NA	ko00640(Propanoate metabolism);ko01100(Metabolic pathways);ko01110(Biosynthesis of secondary metabolites);ko01212(Fatty acid metabolism);ko00061(Fatty acid biosynthesis);ko00620(Pyruvate metabolism)
PC-3p-127107_56	XM_016081303.2	322	343	333	-36.6	-23.9	0.653005	7.5	1-3,343-341;4-17,339-326	x-x,340-340[BULt];18-21,325-322[UP3]	....((((((((((((((.(((&)))-))))))))))))))....	UCACGUUCCAAGGUUCUUCAGG&UCU-AAGAGCCUUGGAACCAUA	1	26.8255	4	1	Output/S24h/cleaveLand_result/t_plot/PC-3p-127107_56_XM_016081303.2_333_TPlot.pdf	0	0	NA	NA	NA	26.8255	0	Inf	up	2.2264e-07	2.57434e-07	yes	GO:0090304(nucleic acid metabolic process);GO:0046483(heterocycle metabolic process);GO:0034641(cellular nitrogen compound metabolic process);GO:0016740(transferase activity);GO:0016070(RNA metabolic process);GO:0006725(cellular aromatic compound metabolic process);GO:1901360(organic cyclic compound metabolic process);GO:0043412(macromolecule modification);GO:0006396(RNA processing);GO:0005488(bi…	NA
PC-3p-127107_56	XM_016085235.2	1284	1306	1295	-36.6	-23.8	0.650273	10	1-4,1306-1303;5-13,1300-1292;16-20,1289-1285	x-x,1302-1301[BULt];14-15,1291-1290[SIL];21-21,1284-1284[UP3]	.(((((..(((((((((..((((&))))--)))))))))..))))).	GAUGGUGACAGGGUUCUGAUGGA&UCUA--AGAGCCUUGGAACCAUA	0	0	NA	NA	NA	1	33.3045	4	0.999999	Output/S8h/cleaveLand_result/t_plot/PC-3p-127107_56_XM_016085235.2_1295_TPlot.pdf	0	33.3045	-Inf	down	7.8779e-09	1.51467e-08	yes	NA	NA
PC-3p-127107_56	XM_016085942.2	1113	1134	1125	-36.6	-23.8	0.650273	9	3-17,1132-1118;18-18,1116-1116	1-2,1134-1133[UP5];x-x,1117-1117[BULt];19-21,1115-1113[UP3]	...(.(((((((((((((((..&..)))))))))))))))-)...	UGGGUGUUCCAAGGUUCUUGUG&UCUAAGAGCCUUGGAAC-CAUA	1	26.8255	4	1	Output/S24h/cleaveLand_result/t_plot/PC-3p-127107_56_XM_016085942.2_1125_TPlot.pdf	0	0	NA	NA	NA	26.8255	0	Inf	up	2.2264e-07	2.57434e-07	yes	GO:0008152(metabolic process);GO:0016787(hydrolase activity);GO:0003824(catalytic activity)	ko01110(Biosynthesis of secondary metabolites);ko00943(Isoflavonoid biosynthesis)
PC-3p-127107_56	XM_016086845.2	624	643	635	-36.6	-25.2	0.688525	6.5	1-3,643-641;7-21,638-624	4-6,640-639[AILq]	(((((((((((((((..-(((&)))...)))))))))))))))	UAUGGUUUCAAGGCUGA-AGA&UCUAAGAGCCUUGGAACCAUA	0	0	NA	NA	NA	1	33.3045	4	0.990918	Output/S8h/cleaveLand_result/t_plot/PC-3p-127107_56_XM_016086845.2_635_TPlot.pdf	0	33.3045	-Inf	down	7.8779e-09	1.51467e-08	yes	GO:0018108(peptidyl-tyrosine phosphorylation);GO:0006468(protein phosphorylation);GO:0006807(nitrogen compound metabolic process);GO:0071704(organic substance metabolic process);GO:1901265(nucleoside phosphate binding);GO:0005524(ATP binding);GO:0035639(purine ribonucleoside triphosphate binding);GO:0032559(adenyl ribonucleotide binding);GO:0003824(catalytic activity);GO:0006464(cellular protein …	ko04626(Plant-pathogen interaction)
PC-3p-127107_56	XM_016087079.2	666	687	677	-36.6	-26.5	0.724044	7	1-7,687-681;8-15,679-672;17-18,670-669	x-x,680-680[BULt];16-16,671-671[SIL];19-21,668-666[UP3]	...((.((((((((.(((((((&)))))))-)))))))).))...	ACAGGGUCCAAGGCUUCUUGGA&UCUAAGA-GCCUUGGAACCAUA	0	0	NA	NA	NA	1	33.3045	4	0.84943	Output/S8h/cleaveLand_result/t_plot/PC-3p-127107_56_XM_016087079.2_677_TPlot.pdf	0	33.3045	-Inf	down	7.8779e-09	1.51467e-08	yes	GO:0016740(transferase activity);GO:0009987(cellular process);GO:0006644(phospholipid metabolic process);GO:0008152(metabolic process);GO:0090407(organophosphate biosynthetic process);GO:0006657(CDP-choline pathway);GO:1901576(organic substance biosynthetic process);GO:0006629(lipid metabolic process);GO:0019637(organophosphate metabolic process);GO:0003824(catalytic activity);GO:0046486(glycerol…	ko00564(Glycerophospholipid metabolism);ko01100(Metabolic pathways)
PC-3p-127107_56	XM_016092749.2	455	478	469	-36.6	-23.8	0.650273	8.5	1-7,478-472;9-13,470-466;14-20,462-456	8-8,471-471[SIL];x-x,465-463[BULt];21-21,455-455[UP3]	.(((((((...(((((.(((((((&))))))).)))))---))))))).	GGUGGUUCUGUCAAGGGUUUUGGA&UCUAAGAGCCUUG---GAACCAUA	2	53.6509	3	0.800483	Output/S24h/cleaveLand_result/t_plot/PC-3p-127107_56_XM_016092749.2_469_TPlot.pdf	0	0	NA	NA	NA	53.6509	0	Inf	up	2.3929e-13	1.027e-12	yes	GO:0032774(RNA biosynthetic process);GO:0090304(nucleic acid metabolic process);GO:1901576(organic substance biosynthetic process);GO:0034654(nucleobase-containing compound biosynthetic process);GO:0043170(macromolecule metabolic process);GO:0006139(nucleobase-containing compound metabolic process);GO:0018130(heterocycle biosynthetic process);GO:0034641(cellular nitrogen compound metabolic proces…	NA
PC-3p-127107_56	XM_016093482.2	392	418	408	-36.6	-24.6	0.672131	12	1-3,418-416;5-15,413-403;16-19,397-394	4-4,415-414[AILt];x-x,402-398[BULt];20-21,393-392[UP3]	..((((.....(((((((((((..(((&)))-.)))))))))))-----))))..	CCUGGUUCCUUUCCGAGGCUCUGAAGA&UCU-AAGAGCCUUGGA-----ACCAUA	0	0	NA	NA	NA	4	133.218	2	0.909004	Output/S8h/cleaveLand_result/t_plot/PC-3p-127107_56_XM_016093482.2_408_TPlot.pdf	0	133.218	-Inf	down	8.0653e-31	3.04653e-29	yes	GO:0008152(metabolic process);GO:0003954(NADH dehydrogenase activity);GO:0016491(oxidoreductase activity);GO:0003824(catalytic activity);GO:0050136(NADH dehydrogenase (quinone) activity);GO:0008137(NADH dehydrogenase (ubiquinone) activity);GO:0016655(oxidoreductase activity, acting on NAD(P)H, quinone or similar compound as acceptor);GO:0016651(oxidoreductase activity, acting on NAD(P)H);GO:00551…	ko01100(Metabolic pathways);ko00190(Oxidative phosphorylation)
PC-3p-127107_56	XM_016094611.2	723	745	734	-36.6	-24.48	0.668852	10	1-5,745-741;8-20,736-724	6-7,740-737[AILt];21-21,723-723[UP3]	.(((((((((((((....(((((&)))))--..))))))))))))).	AGUGGUUUCAAGGCACGAUUAGA&UCUAA--GAGCCUUGGAACCAUA	0	0	NA	NA	NA	1	33.3045	4	0.999618	Output/S8h/cleaveLand_result/t_plot/PC-3p-127107_56_XM_016094611.2_734_TPlot.pdf	0	33.3045	-Inf	down	7.8779e-09	1.51467e-08	yes	GO:0046872(metal ion binding);GO:0016021(integral component of membrane);GO:0005506(iron ion binding);GO:0044425(membrane part);GO:0046914(transition metal ion binding);GO:0046906(tetrapyrrole binding);GO:0043167(ion binding);GO:0005488(binding);GO:0004497(monooxygenase activity);GO:0003824(catalytic activity);GO:0016705(oxidoreductase activity, acting on paired donors, with incorporation or redu…	ko00590(Arachidonic acid metabolism);ko01100(Metabolic pathways);ko00591(Linoleic acid metabolism)
PC-3p-127107_56	XM_016096779.2	963	986	977	-36.6	-28.32	0.77377	8.5	2-14,985-973;17-20,967-964	1-1,986-986[UP5];15-16,972-968[AILt];21-21,963-963[UP3]	.((((.....(((((((((((((.&.)))))))))))))---..)))).	AGUGGGAAUGCCAGGGCUCUUAGG&UCUAAGAGCCUUGG---AACCAUA	1	26.8255	4	0.426464	Output/S24h/cleaveLand_result/t_plot/PC-3p-127107_56_XM_016096779.2_977_TPlot.pdf	0	0	NA	NA	NA	26.8255	0	Inf	up	2.2264e-07	2.57434e-07	yes	GO:0032555(purine ribonucleotide binding);GO:0005488(binding);GO:0017076(purine nucleotide binding);GO:0043168(anion binding);GO:0043167(ion binding);GO:0097367(carbohydrate derivative binding);GO:0005524(ATP binding);GO:0035639(purine ribonucleoside triphosphate binding);GO:0032559(adenyl ribonucleotide binding);GO:0036094(small molecule binding);GO:0030554(adenyl nucleotide binding);GO:0032553(…	ko04141(Protein processing in endoplasmic reticulum);ko04144(Endocytosis);ko03040(Spliceosome)
PC-3p-127107_56	XM_016100158.2	1823	1845	1834	-36.6	-29.4	0.803279	7	1-9,1845-1837;10-19,1834-1825	x-x,1836-1835[BULt];20-21,1824-1823[UP3]	..((((((((((..(((((((((&)))))))))--))))))))))..	CCUGGUUCCAAGAAGCUCUUGGA&UCUAAGAGC--CUUGGAACCAUA	0	0	NA	NA	NA	1	33.3045	4	0.138356	Output/S8h/cleaveLand_result/t_plot/PC-3p-127107_56_XM_016100158.2_1834_TPlot.pdf	0	33.3045	-Inf	down	7.8779e-09	1.51467e-08	yes	NA	NA
PC-3p-127107_56	XM_016102639.1	966	991	982	-36.6	-25.5	0.696721	14	1-11,991-981;12-17,976-971;18-19,969-968	x-x,980-977[BULt];x-x,970-970[BULt];20-21,967-966[UP3]	..((.((((((....(((((((((((&)))))))))))----))))))-))..	CUUGUGUUCCGGCGGGGGCUCUUGGA&UCUAAGAGCCU----UGGAAC-CAUA	2	53.6509	3	0.347416	Output/S24h/cleaveLand_result/t_plot/PC-3p-127107_56_XM_016102639.1_982_TPlot.pdf	2	66.6089	3	0.293167	Output/S8h/cleaveLand_result/t_plot/PC-3p-127107_56_XM_016102639.1_982_TPlot.pdf	53.6509	66.6089	-0.312112	down	0.23734	0.250512	yes	NA	ko04016(MAPK signaling pathway - plant);ko04626(Plant-pathogen interaction)
PC-3p-127107_56	XM_016104137.2	545	566	556	-36.6	-24.3	0.663934	7	1-7,566-560;9-9,558-558;10-18,556-548	8-8,559-559[SIL];x-x,557-557[BULt];19-21,547-545[UP3]	...(((((((((.(.(((((((&))))))).)-)))))))))...	CAGGGUUCCAAGAGAUCUUAGA&UCUAAGAGC-CUUGGAACCAUA	5	134.127	3	0.66869	Output/S24h/cleaveLand_result/t_plot/PC-3p-127107_56_XM_016104137.2_556_TPlot.pdf	6	199.827	3	0.592622	Output/S8h/cleaveLand_result/t_plot/PC-3p-127107_56_XM_016104137.2_556_TPlot.pdf	134.127	199.827	-0.575147	down	0.00032382	0.00035802	yes	GO:0050896(response to stimulus)	NA
PC-3p-127107_56	XM_016105533.2	2006	2027	2017	-36.6	-24.3	0.663934	13	5-8,2023-2020;9-18,2018-2009	1-4,2027-2024[UP5];x-x,2019-2019[BULt];19-21,2008-2006[UP3]	...((((((((((.((((....&....))))-))))))))))...	UGGGGUUCCAGGGUCUCUGCAG&UCUAAGAG-CCUUGGAACCAUA	0	0	NA	NA	NA	2	66.6089	2	0.950564	Output/S8h/cleaveLand_result/t_plot/PC-3p-127107_56_XM_016105533.2_2017_TPlot.pdf	0	66.6089	-Inf	down	3.3071e-16	2.22267e-15	yes	GO:0043167(ion binding);GO:0097159(organic cyclic compound binding);GO:1901681(sulfur compound binding);GO:0046872(metal ion binding);GO:0016831(carboxy-lyase activity);GO:0016830(carbon-carbon lyase activity);GO:0043168(anion binding);GO:0000287(magnesium ion binding);GO:0019842(vitamin binding);GO:0050662(coenzyme binding);GO:0003824(catalytic activity);GO:0043169(cation binding);GO:0036094(sma…	ko01110(Biosynthesis of secondary metabolites);ko00010(Glycolysis / Gluconeogenesis);ko01100(Metabolic pathways)
PC-3p-127107_56	XM_016105830.2	1227	1250	1240	-36.6	-24.2	0.661202	10	2-6,1249-1245;7-11,1243-1239;12-18,1236-1230	1-1,1250-1250[UP5];x-x,1244-1244[BULt];x-x,1238-1237[BULt];19-21,1229-1227[UP3]	...(((((((..(((((.(((((.&.)))))-)))))--)))))))...	UGCGGUUCCAAAAGGCUACUUAGC&UCUAAG-AGCCU--UGGAACCAUA	1	26.8255	4	0.999992	Output/S24h/cleaveLand_result/t_plot/PC-3p-127107_56_XM_016105830.2_1240_TPlot.pdf	0	0	NA	NA	NA	26.8255	0	Inf	up	2.2264e-07	2.57434e-07	yes	GO:0009719(response to endogenous stimulus);GO:0050896(response to stimulus);GO:0009725(response to hormone);GO:0009733(response to auxin);GO:0042221(response to chemical);GO:0010033(response to organic substance)	ko04075(Plant hormone signal transduction)
PC-3p-127107_56	XM_016109206.2	383	403	394	-36.6	-24.1	0.65847	14	7-18,397-386	1-6,403-398[UP5];19-21,385-383[UP3]	...((((((((((((......&......))))))))))))...	GGAGGUUCCAAGGCUGGGAAA&UCUAAGAGCCUUGGAACCAUA	1	26.8255	4	0.999998	Output/S24h/cleaveLand_result/t_plot/PC-3p-127107_56_XM_016109206.2_394_TPlot.pdf	0	0	NA	NA	NA	26.8255	0	Inf	up	2.2264e-07	2.57434e-07	yes	GO:0016747(transferase activity, transferring acyl groups other than amino-acyl groups);GO:0016740(transferase activity);GO:0008152(metabolic process);GO:0003824(catalytic activity);GO:0009058(biosynthetic process);GO:0016746(transferase activity, transferring acyl groups)	ko01110(Biosynthesis of secondary metabolites);ko01100(Metabolic pathways);ko04712(Circadian rhythm - plant);ko00941(Flavonoid biosynthesis)
PC-3p-127107_56	XM_016111551.2	801	830	820	-36.6	-25.7	0.702186	22.5	1-4,830-827;6-11,824-819;12-21,810-801	5-5,826-825[AILt];x-x,818-811[BULt]	((((((((((........((((((..((((&))))-.))))))--------))))))))))	UGUGGUUCCAGAACCGCAGGGCUCGGUGGA&UCUA-AGAGCCU--------UGGAACCAUA	0	0	NA	NA	NA	2	66.6089	3	0.256166	Output/S8h/cleaveLand_result/t_plot/PC-3p-127107_56_XM_016111551.2_820_TPlot.pdf	0	66.6089	-Inf	down	3.3071e-16	2.22267e-15	yes	GO:0097159(organic cyclic compound binding);GO:0003676(nucleic acid binding);GO:1901363(heterocyclic compound binding);GO:0005488(binding);GO:0003677(DNA binding)	NA
PC-3p-127107_56	XM_016112192.2	474	494	485	-36.6	-25.1	0.685792	14	8-20,487-475	1-7,494-488[UP5];21-21,474-474[UP3]	.(((((((((((((.......&.......))))))))))))).	GAUGGUUCCAAGGCAACAGGU&UCUAAGAGCCUUGGAACCAUA	0	0	NA	NA	NA	1	33.3045	4	0.993807	Output/S8h/cleaveLand_result/t_plot/PC-3p-127107_56_XM_016112192.2_485_TPlot.pdf	0	33.3045	-Inf	down	7.8779e-09	1.51467e-08	yes	GO:0016051(carbohydrate biosynthetic process);GO:1901576(organic substance biosynthetic process);GO:0044042(glucan metabolic process);GO:0008152(metabolic process);GO:0044422(organelle part);GO:0043170(macromolecule metabolic process);GO:0016868(intramolecular transferase activity, phosphotransferases);GO:0005622(intracellular);GO:0009629(response to gravity);GO:0009590(detection of gravity);GO:0…	ko00500(Starch and sucrose metabolism);ko00230(Purine metabolism);ko00010(Glycolysis / Gluconeogenesis);ko01100(Metabolic pathways);ko01110(Biosynthesis of secondary metabolites);ko00030(Pentose phosphate pathway);ko00520(Amino sugar and nucleotide sugar metabolism);ko00052(Galactose metabolism)
PC-3p-127107_56	XM_016112487.2	808	828	820	-36.6	-23.9	0.653005	5.5	1-4,828-825;6-15,824-815;16-21,813-808	5-5,x-x[BULq];x-x,814-814[BULt]	((((((.((((((((((-((((&)))).))))))))))-))))))	UAUGGUGUUCAAGGUUC-UGGA&UCUAAGAGCCUUGGA-ACCAUA	0	0	NA	NA	NA	1	33.3045	4	0.999996	Output/S8h/cleaveLand_result/t_plot/PC-3p-127107_56_XM_016112487.2_820_TPlot.pdf	0	33.3045	-Inf	down	7.8779e-09	1.51467e-08	yes	GO:0043226(organelle);GO:1901360(organic cyclic compound metabolic process);GO:0043170(macromolecule metabolic process);GO:0036094(small molecule binding);GO:0097159(organic cyclic compound binding);GO:0005488(binding);GO:0050794(regulation of cellular process);GO:0016070(RNA metabolic process);GO:0044238(primary metabolic process);GO:1901363(heterocyclic compound binding);GO:0044260(cellular mac…	NA
PC-3p-127107_56	XM_016114373.2	1813	1837	1827	-36.6	-24	0.655738	10.5	2-5,1836-1833;7-15,1830-1822;16-21,1818-1813	1-1,1837-1837[UP5];6-6,1832-1831[AILt];x-x,1821-1819[BULt]	((((((...(((((((((..((((.&.))))-.)))))))))---))))))	UGUGGUUAAUCCAGGGCUGGUUGGG&UCUAA-GAGCCUUGGA---ACCAUA	0	0	NA	NA	NA	2	66.6089	2	0.981457	Output/S8h/cleaveLand_result/t_plot/PC-3p-127107_56_XM_016114373.2_1827_TPlot.pdf	0	66.6089	-Inf	down	3.3071e-16	2.22267e-15	yes	NA	ko03015(mRNA surveillance pathway)
PC-3p-127107_56	XM_016116574.2	559	586	577	-36.6	-23.8	0.650273	10.5	1-4,586-583;6-14,581-573;15-21,565-559	5-5,582-582[SIL];x-x,572-566[BULt]	(((((((.......(((((((((.((((&)))).)))))))))-------)))))))	UGUGGUUUUGGAAGCCAAGGUUCAUAGA&UCUAAGAGCCUUGG-------AACCAUA	3	80.4764	2	0.996342	Output/S24h/cleaveLand_result/t_plot/PC-3p-127107_56_XM_016116574.2_577_TPlot.pdf	0	0	NA	NA	NA	80.4764	0	Inf	up	2.9371e-19	3.48128e-18	yes	GO:1901071(glucosamine-containing compound metabolic process);GO:0006022(aminoglycan metabolic process);GO:0009057(macromolecule catabolic process);GO:0003824(catalytic activity);GO:0008152(metabolic process);GO:1901136(carbohydrate derivative catabolic process);GO:0006026(aminoglycan catabolic process);GO:0006030(chitin metabolic process);GO:0016798(hydrolase activity, acting on glycosyl bonds);…	ko01100(Metabolic pathways);ko00520(Amino sugar and nucleotide sugar metabolism)
PC-3p-127107_56	XM_016116888.2	2437	2460	2448	-36.6	-26.3	0.718579	11	1-3,2460-2458;4-6,2453-2451;8-20,2450-2438	x-x,2457-2454[BULt];7-7,x-x[BULq];21-21,2437-2437[UP3]	.(((((((((((((-(((....(((&)))----))).))))))))))))).	GAUGGUUCCAAGGC-CUUCCCAAGA&UCU----AAGAGCCUUGGAACCAUA	2	53.6509	2	0.595215	Output/S24h/cleaveLand_result/t_plot/PC-3p-127107_56_XM_016116888.2_2448_TPlot.pdf	1	33.3045	4	0.888212	Output/S8h/cleaveLand_result/t_plot/PC-3p-127107_56_XM_016116888.2_2448_TPlot.pdf	53.6509	33.3045	0.687888	up	0.029111	0.0312173	yes	NA	NA
PC-3p-127107_56	XM_021139693.1	1856	1876	1867	-36.6	-26	0.710383	8.5	1-3,1876-1874;6-15,1871-1862;17-20,1860-1857	4-5,1873-1872[SIL];16-16,1861-1861[SIL];21-21,1856-1856[UP3]	.((((.((((((((((..(((&)))..)))))))))).)))).	AGUGGAUCCAAGGCUUGGGGA&UCUAAGAGCCUUGGAACCAUA	0	0	NA	NA	NA	1	33.3045	4	0.915221	Output/S8h/cleaveLand_result/t_plot/PC-3p-127107_56_XM_021139693.1_1867_TPlot.pdf	0	33.3045	-Inf	down	7.8779e-09	1.51467e-08	yes	GO:0006464(cellular protein modification process);GO:0016740(transferase activity);GO:0035639(purine ribonucleoside triphosphate binding);GO:1901564(organonitrogen compound metabolic process);GO:0043412(macromolecule modification);GO:0016020(membrane);GO:0032553(ribonucleotide binding);GO:1901363(heterocyclic compound binding);GO:0008152(metabolic process);GO:0016773(phosphotransferase activity, …	ko04626(Plant-pathogen interaction)
PC-3p-127107_56	XM_021140420.1	689	712	701	-36.6	-24.98	0.682514	12	1-4,712-709;7-10,704-701;11-20,699-690	5-6,708-705[AILt];x-x,700-700[BULt];21-21,689-689[UP3]	.((((((((((.((((....((((&))))--..))))-)))))))))).	GAUGGUUCCAAGGGCUGAGGUGGA&UCUA--AGAGCC-UUGGAACCAUA	4	107.302	2	0.89621	Output/S24h/cleaveLand_result/t_plot/PC-3p-127107_56_XM_021140420.1_701_TPlot.pdf	0	0	NA	NA	NA	107.302	0	Inf	up	3.8116e-25	9.90703e-24	yes	NA	NA
PC-3p-127107_56	XM_021141676.1	1167	1188	1179	-36.6	-25.8	0.704918	10	1-10,1188-1179;13-19,1175-1169	11-12,1178-1176[AILt];20-21,1168-1167[UP3]	..(((((((...((((((((((&))))))))))-..)))))))..	AUUGGUUCCUCUGGUUCUUGGA&UCUAAGAGCC-UUGGAACCAUA	1	26.8255	4	0.95858	Output/S24h/cleaveLand_result/t_plot/PC-3p-127107_56_XM_021141676.1_1179_TPlot.pdf	0	0	NA	NA	NA	26.8255	0	Inf	up	2.2264e-07	2.57434e-07	yes	GO:0070011(peptidase activity, acting on L-amino acid peptides);GO:0009987(cellular process);GO:0005737(cytoplasm);GO:0015833(peptide transport);GO:0033036(macromolecule localization);GO:0016787(hydrolase activity);GO:0008152(metabolic process);GO:0019538(protein metabolic process);GO:0061919(process utilizing autophagic mechanism);GO:0008233(peptidase activity);GO:0071705(nitrogen compound trans…	ko04136(Autophagy - other)
PC-3p-127107_56	XM_021141881.1	1540	1564	1554	-36.6	-23.9	0.653005	7.5	1-3,1564-1562;4-14,1560-1550;15-20,1546-1541	x-x,1561-1561[BULt];x-x,1549-1547[BULt];21-21,1540-1540[UP3]	.((((((...(((((((((((.(((&)))-)))))))))))---)))))).	GAUGGUUUUGCUGAGGCUCUUGAGA&UCU-AAGAGCCUUGG---AACCAUA	1	26.8255	4	1	Output/S24h/cleaveLand_result/t_plot/PC-3p-127107_56_XM_021141881.1_1554_TPlot.pdf	0	0	NA	NA	NA	26.8255	0	Inf	up	2.2264e-07	2.57434e-07	yes	GO:0030312(external encapsulating structure);GO:0046556(alpha-L-arabinofuranosidase activity);GO:0044424(intracellular part);GO:0071704(organic substance metabolic process);GO:0016020(membrane);GO:0043226(organelle);GO:0016787(hydrolase activity);GO:0016052(carbohydrate catabolic process);GO:0003824(catalytic activity);GO:0044238(primary metabolic process);GO:0000272(polysaccharide catabolic proc…	ko01100(Metabolic pathways);ko00520(Amino sugar and nucleotide sugar metabolism)
PC-3p-127107_56	XM_021143610.1	731	751	743	-36.6	-23.9	0.653005	5.5	1-4,751-748;6-15,747-738;16-21,736-731	5-5,x-x[BULq];x-x,737-737[BULt]	((((((.((((((((((-((((&)))).))))))))))-))))))	UAUGGUGUUCAAGGUUC-UGGA&UCUAAGAGCCUUGGA-ACCAUA	1	26.8255	4	1	Output/S24h/cleaveLand_result/t_plot/PC-3p-127107_56_XM_021143610.1_743_TPlot.pdf	0	0	NA	NA	NA	26.8255	0	Inf	up	2.2264e-07	2.57434e-07	yes	GO:0043226(organelle);GO:1901360(organic cyclic compound metabolic process);GO:0043170(macromolecule metabolic process);GO:0036094(small molecule binding);GO:0097159(organic cyclic compound binding);GO:0005488(binding);GO:0050794(regulation of cellular process);GO:0016070(RNA metabolic process);GO:0044238(primary metabolic process);GO:1901363(heterocyclic compound binding);GO:0044260(cellular mac…	NA
PC-3p-12725_949	BGI_novel_T003024	1029	1050	1042	-39.4	-29.3	0.743655	6	1-9,1050-1042;11-18,1041-1034;19-21,1031-1029	10-10,x-x[BULq];x-x,1033-1032[BULt]	(((..((((((((-(((((((((&))))))))).))))))))--)))	GAGGUGGAUCAAG-CGGCGGGAG&UUCCCGUCGACUUGAUCU--CUC	1	26.8255	4	0.315486	Output/S24h/cleaveLand_result/t_plot/PC-3p-12725_949_BGI_novel_T003024_1042_TPlot.pdf	0	0	NA	NA	NA	26.8255	0	Inf	up	2.2264e-07	2.57434e-07	yes	GO:0097159(organic cyclic compound binding);GO:0003676(nucleic acid binding);GO:0003723(RNA binding);GO:0005488(binding);GO:0036094(small molecule binding);GO:1901363(heterocyclic compound binding);GO:0000166(nucleotide binding);GO:1901265(nucleoside phosphate binding)	ko03040(Spliceosome)
PC-3p-12725_949	BGI_novel_T004344	908	932	923	-39.4	-25.8	0.654822	10.5	2-5,931-928;7-12,926-921;13-18,918-913;19-21,910-908	1-1,932-932[UP5];6-6,927-927[SIL];x-x,920-919[BULt];x-x,912-911[BULt]	(((..((((((..((((((.((((.&.)))).))))))--))))))--)))	GAGCAAGAUCGCUGGUCGAGGGGAC&UUCCCGUCGACU--UGAUCU--CUC	1	26.8255	4	0.999977	Output/S24h/cleaveLand_result/t_plot/PC-3p-12725_949_BGI_novel_T004344_923_TPlot.pdf	0	0	NA	NA	NA	26.8255	0	Inf	up	2.2264e-07	2.57434e-07	yes	GO:0008135(translation factor activity, RNA binding);GO:0097159(organic cyclic compound binding);GO:0003723(RNA binding);GO:1901363(heterocyclic compound binding);GO:0003676(nucleic acid binding);GO:0003743(translation initiation factor activity);GO:0005488(binding)	ko04144(Endocytosis)
PC-3p-12725_949	BGI_novel_T006646	1059	1082	1071	-39.4	-25.7	0.652284	10.5	2-6,1081-1077;7-14,1074-1067;15-21,1065-1059	1-1,1082-1082[UP5];x-x,1076-1075[BULt];x-x,1066-1066[BULt]	(((((((.((((((((..(((((.&.)))))--))))))))-)))))))	GAGAGGUGCAGGUUGAAAUGGGGG&UUCCCG--UCGACUUG-AUCUCUC	0	0	NA	NA	NA	1	33.3045	4	0.999955	Output/S8h/cleaveLand_result/t_plot/PC-3p-12725_949_BGI_novel_T006646_1071_TPlot.pdf	0	33.3045	-Inf	down	7.8779e-09	1.51467e-08	yes	GO:0003677(DNA binding);GO:0097159(organic cyclic compound binding);GO:0005488(binding);GO:0003676(nucleic acid binding);GO:0046983(protein dimerization activity);GO:1901363(heterocyclic compound binding);GO:0005515(protein binding)	ko01100(Metabolic pathways);ko00510(N-Glycan biosynthesis);ko02010(ABC transporters);ko03050(Proteasome);ko04141(Protein processing in endoplasmic reticulum)
PC-3p-12725_949	BGI_novel_T006926	2381	2400	2392	-39.4	-30.5	0.774112	5.5	1-9,2400-2392;11-12,2391-2390;14-21,2388-2381	10-10,x-x[BULq];13-13,2389-2389[SIL]	((((((((.((-(((((((((&))))))))).)).))))))))	GAGGGAUCCGG-CGACGGGGA&UUCCCGUCGACUUGAUCUCUC	1	26.8255	4	0.0730071	Output/S24h/cleaveLand_result/t_plot/PC-3p-12725_949_BGI_novel_T006926_2392_TPlot.pdf	0	0	NA	NA	NA	26.8255	0	Inf	up	2.2264e-07	2.57434e-07	yes	GO:0097159(organic cyclic compound binding);GO:0003676(nucleic acid binding);GO:1901363(heterocyclic compound binding);GO:0005488(binding)	ko02010(ABC transporters)
PC-3p-12725_949	BGI_novel_T011979	1148	1169	1159	-39.4	-26.1	0.662437	8	1-4,1169-1166;6-8,1163-1161;11-21,1158-1148	5-5,1165-1164[AILt];9-10,1160-1159[SIL]	(((((((((((..(((..((((&))))-.)))..)))))))))))	GAGAGAUCAAGAAGACUUGGAA&UUCC-CGUCGACUUGAUCUCUC	1	26.8255	4	0.999832	Output/S24h/cleaveLand_result/t_plot/PC-3p-12725_949_BGI_novel_T011979_1159_TPlot.pdf	0	0	NA	NA	NA	26.8255	0	Inf	up	2.2264e-07	2.57434e-07	yes	NA	ko00052(Galactose metabolism)
PC-3p-12725_949	XM_016078066.2	984	1004	995	-39.4	-26.2	0.664975	8	2-4,1003-1001;5-8,999-996;10-21,995-984	1-1,1004-1004[UP5];x-x,1000-1000[BULt];9-9,x-x[BULq]	((((((((((((-((((.(((.&.)))-)))).))))))))))))	GAGGGGUCAGGU-GAUGAGGAC&UUCC-CGUCGACUUGAUCUCUC	1	26.8255	4	0.999651	Output/S24h/cleaveLand_result/t_plot/PC-3p-12725_949_XM_016078066.2_995_TPlot.pdf	2	66.6089	3	0.474233	Output/S8h/cleaveLand_result/t_plot/PC-3p-12725_949_XM_016078066.2_995_TPlot.pdf	26.8255	66.6089	-1.31211	down	3.8576e-05	4.31118e-05	yes	GO:0043168(anion binding);GO:0046872(metal ion binding);GO:0044434(chloroplast part);GO:0097367(carbohydrate derivative binding);GO:0009408(response to heat);GO:0043227(membrane-bounded organelle);GO:0009628(response to abiotic stimulus);GO:0031975(envelope);GO:0005488(binding);GO:0017076(purine nucleotide binding);GO:0005515(protein binding);GO:0031072(heat shock protein binding);GO:0005524(ATP …	NA
PC-3p-12725_949	XM_016078894.2	1119	1140	1131	-39.4	-27	0.685279	10.5	4-11,1137-1130;13-21,1127-1119	1-3,1140-1138[UP5];12-12,1129-1128[AILt]	(((((((((..((((((((...&...))))))))-.)))))))))	GGGAGGUCGCCGUCGACGGUGC&UUCCCGUCGAC-UUGAUCUCUC	0	0	NA	NA	NA	1	33.3045	4	0.971351	Output/S8h/cleaveLand_result/t_plot/PC-3p-12725_949_XM_016078894.2_1131_TPlot.pdf	0	33.3045	-Inf	down	7.8779e-09	1.51467e-08	yes	NA	ko00940(Phenylpropanoid biosynthesis);ko00500(Starch and sucrose metabolism);ko01110(Biosynthesis of secondary metabolites);ko01100(Metabolic pathways);ko00460(Cyanoamino acid metabolism)
PC-3p-12725_949	XM_016080561.2	1790	1808	1799	-39.4	-26.5	0.672589	5	1-12,1808-1797;15-20,1796-1791	13-14,x-x[BULq];21-21,1790-1790[UP3]	.((((((--((((((((((((&))))))))))))..)))))).	UAGAGAU--GGUCGAUGGGAA&UUCCCGUCGACUUGAUCUCUC	0	0	NA	NA	NA	1	33.3045	4	0.996513	Output/S8h/cleaveLand_result/t_plot/PC-3p-12725_949_XM_016080561.2_1799_TPlot.pdf	0	33.3045	-Inf	down	7.8779e-09	1.51467e-08	yes	GO:0043170(macromolecule metabolic process);GO:0010033(response to organic substance);GO:0071367(cellular response to brassinosteroid stimulus);GO:0009741(response to brassinosteroid);GO:0016311(dephosphorylation);GO:0071407(cellular response to organic cyclic compound);GO:1901564(organonitrogen compound metabolic process);GO:0006807(nitrogen compound metabolic process);GO:0043412(macromolecule m…	NA
PC-3p-12725_949	XM_016087288.2	588	607	598	-39.4	-27	0.685279	7.5	1-5,607-603;7-8,601-600;11-14,597-594;16-21,593-588	6-6,602-602[SIL];9-10,599-598[SIL];15-15,x-x[BULq]	((((((-((((..((.(((((&))))).))..)))).))))))	GAGAGA-CAAGGAGAGGGGAG&UUCCCGUCGACUUGAUCUCUC	1	26.8255	4	0.983323	Output/S24h/cleaveLand_result/t_plot/PC-3p-12725_949_XM_016087288.2_598_TPlot.pdf	0	0	NA	NA	NA	26.8255	0	Inf	up	2.2264e-07	2.57434e-07	yes	NA	ko01200(Carbon metabolism);ko00010(Glycolysis / Gluconeogenesis);ko01100(Metabolic pathways);ko00030(Pentose phosphate pathway)
PC-3p-12725_949	XM_016089688.2	2166	2188	2178	-39.4	-27.2	0.690355	7	1-7,2188-2182;8-10,2180-2178;11-13,2176-2174;16-21,2171-2166	x-x,2181-2181[BULt];x-x,2177-2177[BULt];14-15,2173-2172[SIL]	((((((..(((.(((.(((((((&)))))))-)))-)))..))))))	GGGAGAGAGAGCUCGAACGGGAA&UUCCCGU-CGA-CUUGAUCUCUC	1	26.8255	4	0.95752	Output/S24h/cleaveLand_result/t_plot/PC-3p-12725_949_XM_016089688.2_2178_TPlot.pdf	0	0	NA	NA	NA	26.8255	0	Inf	up	2.2264e-07	2.57434e-07	yes	GO:0005488(binding);GO:0097159(organic cyclic compound binding);GO:0043168(anion binding);GO:1901265(nucleoside phosphate binding);GO:0017111(nucleoside-triphosphatase activity);GO:0016787(hydrolase activity);GO:0016462(pyrophosphatase activity);GO:0030554(adenyl nucleotide binding);GO:1901363(heterocyclic compound binding);GO:0003824(catalytic activity);GO:0035639(purine ribonucleoside triphosph…	NA
PC-3p-12725_949	XM_016090820.2	628	657	648	-39.4	-27.2	0.690355	22.5	1-5,657-653;7-12,651-646;13-21,636-628	6-6,652-652[SIL];x-x,645-637[BULt]	(((((((((.........((((((.(((((&))))).))))))---------)))))))))	GGGAGAUCACACCAUCAUGGUCGGAGGGAA&UUCCCGUCGACU---------UGAUCUCUC	1	26.8255	4	0.937941	Output/S24h/cleaveLand_result/t_plot/PC-3p-12725_949_XM_016090820.2_648_TPlot.pdf	0	0	NA	NA	NA	26.8255	0	Inf	up	2.2264e-07	2.57434e-07	yes	GO:0003824(catalytic activity);GO:0044260(cellular macromolecule metabolic process);GO:0043169(cation binding);GO:0043170(macromolecule metabolic process);GO:0009056(catabolic process);GO:0032446(protein modification by small protein conjugation);GO:0008152(metabolic process);GO:0036211(protein modification process);GO:0071704(organic substance metabolic process);GO:0051603(proteolysis involved i…	NA
PC-3p-12725_949	XM_016092592.2	1066	1087	1078	-39.4	-26	0.659898	9.5	2-11,1086-1077;14-19,1073-1068	1-1,1087-1087[UP5];12-13,1076-1074[AILt];20-21,1067-1066[UP3]	..((((((...((((((((((.&.))))))))))-..))))))..	CCGGGAUCCAUGUCGAUGGGAU&UUCCCGUCGAC-UUGAUCUCUC	0	0	NA	NA	NA	2	66.6089	2	0.936254	Output/S8h/cleaveLand_result/t_plot/PC-3p-12725_949_XM_016092592.2_1078_TPlot.pdf	0	66.6089	-Inf	down	3.3071e-16	2.22267e-15	yes	GO:0032787(monocarboxylic acid metabolic process);GO:0044422(organelle part);GO:0008152(metabolic process);GO:0006090(pyruvate metabolic process);GO:0009532(plastid stroma);GO:0043226(organelle);GO:0044237(cellular metabolic process);GO:0006732(coenzyme metabolic process);GO:0006082(organic acid metabolic process);GO:0009526(plastid envelope);GO:0055114(oxidation-reduction process);GO:0035384(thi…	ko00010(Glycolysis / Gluconeogenesis);ko01110(Biosynthesis of secondary metabolites);ko00620(Pyruvate metabolism);ko00020(Citrate cycle (TCA cycle));ko01100(Metabolic pathways);ko01200(Carbon metabolism)
PC-3p-12725_949	XM_016096771.2	1252	1273	1264	-39.4	-27.9	0.708122	6	1-13,1273-1261;15-17,1259-1257;18-21,1255-1252	14-14,1260-1260[SIL];x-x,1256-1256[BULt]	((((.(((.(((((((((((((&))))))))))))).)))-))))	GGGAUGAUGGGGUUGAUGGGAA&UUCCCGUCGACUUGAUC-UCUC	1	26.8255	4	0.737971	Output/S24h/cleaveLand_result/t_plot/PC-3p-12725_949_XM_016096771.2_1264_TPlot.pdf	2	66.6089	2	0.319525	Output/S8h/cleaveLand_result/t_plot/PC-3p-12725_949_XM_016096771.2_1264_TPlot.pdf	26.8255	66.6089	-1.31211	down	3.8576e-05	4.31118e-05	yes	GO:0044260(cellular macromolecule metabolic process);GO:0006470(protein dephosphorylation);GO:1901564(organonitrogen compound metabolic process);GO:0006807(nitrogen compound metabolic process);GO:0008152(metabolic process);GO:0006796(phosphate-containing compound metabolic process);GO:0016787(hydrolase activity);GO:0009987(cellular process);GO:0044237(cellular metabolic process);GO:0044238(primar…	NA
PC-3p-12725_949	XM_016098671.2	134	158	149	-39.4	-27.3	0.692893	9	1-5,158-154;7-11,152-148;12-15,145-142;16-21,139-134	6-6,153-153[SIL];x-x,147-146[BULt];x-x,141-140[BULt]	((((((..((((..(((((.(((((&))))).)))))--))))--))))))	GAGAGAAAUCAGAUGUCGAGGGGAA&UUCCCGUCGAC--UUGA--UCUCUC	1	26.8255	4	0.934724	Output/S24h/cleaveLand_result/t_plot/PC-3p-12725_949_XM_016098671.2_149_TPlot.pdf	0	0	NA	NA	NA	26.8255	0	Inf	up	2.2264e-07	2.57434e-07	yes	GO:0016021(integral component of membrane);GO:0031224(intrinsic component of membrane);GO:0044425(membrane part);GO:0016020(membrane)	NA
PC-3p-12725_949	XM_016102010.2	667	688	679	-39.4	-27.9	0.708122	6.5	1-10,688-679;11-11,677-677;13-19,675-669	x-x,678-678[BULt];12-12,676-676[SIL];20-21,668-667[UP3]	..(((((((.(.((((((((((&))))))))))-).)))))))..	UCGGGAUCACGUUCGACGGGAA&UUCCCGUCGA-CUUGAUCUCUC	3	80.4764	3	0.137681	Output/S24h/cleaveLand_result/t_plot/PC-3p-12725_949_XM_016102010.2_679_TPlot.pdf	0	0	NA	NA	NA	80.4764	0	Inf	up	2.9371e-19	3.48128e-18	yes	NA	ko00500(Starch and sucrose metabolism);ko00940(Phenylpropanoid biosynthesis);ko00460(Cyanoamino acid metabolism);ko01100(Metabolic pathways);ko01110(Biosynthesis of secondary metabolites);ko04626(Plant-pathogen interaction);ko04016(MAPK signaling pathway - plant)
PC-3p-12725_949	XM_016103633.2	1205	1224	1216	-39.4	-26.9	0.682741	6.5	2-5,1223-1220;7-20,1219-1206	1-1,1224-1224[UP5];6-6,x-x[BULq];21-21,1205-1205[UP3]	.((((((((((((((-((((.&.)))).)))))))))))))).	CAGGGAUCAAGUUGG-GGGAG&UUCCCGUCGACUUGAUCUCUC	1	26.8255	4	0.991781	Output/S24h/cleaveLand_result/t_plot/PC-3p-12725_949_XM_016103633.2_1216_TPlot.pdf	0	0	NA	NA	NA	26.8255	0	Inf	up	2.2264e-07	2.57434e-07	yes	NA	NA
PC-3p-12725_949	XM_016103754.2	549	567	558	-39.4	-27.2	0.690355	7.5	1-11,567-557;14-19,556-551	12-13,x-x[BULq];20-21,550-549[UP3]	..((((((--(((((((((((&)))))))))))..))))))..	UCGAGGUC--GUCGGCGGGGA&UUCCCGUCGACUUGAUCUCUC	2	53.6509	2	0.657413	Output/S24h/cleaveLand_result/t_plot/PC-3p-12725_949_XM_016103754.2_558_TPlot.pdf	0	0	NA	NA	NA	53.6509	0	Inf	up	2.3929e-13	1.027e-12	yes	NA	NA
PC-3p-12725_949	XM_016105435.2	697	716	708	-39.4	-26.5	0.672589	7	3-8,714-709;10-20,708-698	1-2,716-715[UP5];9-9,x-x[BULq];21-21,697-697[UP3]	.(((((((((((-((((((..&..)))))).))))))))))).	AAGAGAUCAAGU-GAUGGGCA&UUCCCGUCGACUUGAUCUCUC	2	53.6509	2	0.902398	Output/S24h/cleaveLand_result/t_plot/PC-3p-12725_949_XM_016105435.2_708_TPlot.pdf	0	0	NA	NA	NA	53.6509	0	Inf	up	2.3929e-13	1.027e-12	yes	GO:0060255(regulation of macromolecule metabolic process);GO:0006355(regulation of transcription, DNA-templated);GO:0050789(regulation of biological process);GO:2001141(regulation of RNA biosynthetic process);GO:0042393(histone binding);GO:0031323(regulation of cellular metabolic process);GO:0008270(zinc ion binding);GO:0010556(regulation of macromolecule biosynthetic process);GO:0031326(regulati…	NA
PC-3p-12725_949	XM_016108390.2	1230	1248	1241	-39.4	-27.1	0.687817	8.5	3-6,1246-1243;8-9,1242-1241;11-21,1240-1230	1-2,1248-1247[UP5];7-7,x-x[BULq];10-10,x-x[BULq]	(((((((((((-((-((((..&..)))).)).)))))))))))	GAGAGGUCAGG-CG-CGGGCA&UUCCCGUCGACUUGAUCUCUC	2	53.6509	2	0.683444	Output/S24h/cleaveLand_result/t_plot/PC-3p-12725_949_XM_016108390.2_1241_TPlot.pdf	0	0	NA	NA	NA	53.6509	0	Inf	up	2.3929e-13	1.027e-12	yes	GO:0048471(perinuclear region of cytoplasm);GO:0009816(defense response to bacterium, incompatible interaction);GO:0031348(negative regulation of defense response);GO:0065007(biological regulation);GO:0043227(membrane-bounded organelle);GO:0009605(response to external stimulus);GO:0043207(response to external biotic stimulus);GO:0045087(innate immune response);GO:0048519(negative regulation of bi…	ko00514(Other types of O-glycan biosynthesis)
PC-3p-12725_949	XM_016110426.2	2455	2474	2466	-39.4	-30.5	0.774112	5.5	1-9,2474-2466;11-12,2465-2464;14-21,2462-2455	10-10,x-x[BULq];13-13,2463-2463[SIL]	((((((((.((-(((((((((&))))))))).)).))))))))	GAGGGAUCCGG-CGACGGGGA&UUCCCGUCGACUUGAUCUCUC	2	53.6509	2	0.0345127	Output/S24h/cleaveLand_result/t_plot/PC-3p-12725_949_XM_016110426.2_2466_TPlot.pdf	0	0	NA	NA	NA	53.6509	0	Inf	up	2.3929e-13	1.027e-12	yes	GO:0097159(organic cyclic compound binding);GO:0003676(nucleic acid binding);GO:1901363(heterocyclic compound binding);GO:0005488(binding)	ko02010(ABC transporters)
PC-3p-12725_949	XM_016112267.2	1112	1134	1124	-39.4	-26.6	0.675127	7	2-3,1133-1132;4-6,1130-1128;8-15,1126-1119;16-21,1117-1112	1-1,1134-1134[UP5];x-x,1131-1131[BULt];7-7,1127-1127[SIL];x-x,1118-1118[BULt]	((((((.((((((((.(((.((.&.))-))).))))))))-))))))	GAGAGACUCAAGUUGUCGGAGAU&UUC-CCGUCGACUUGA-UCUCUC	0	0	NA	NA	NA	1	33.3045	4	0.995953	Output/S8h/cleaveLand_result/t_plot/PC-3p-12725_949_XM_016112267.2_1124_TPlot.pdf	0	33.3045	-Inf	down	7.8779e-09	1.51467e-08	yes	GO:0003824(catalytic activity);GO:0005488(binding);GO:0050662(coenzyme binding);GO:0048037(cofactor binding)	ko00040(Pentose and glucuronate interconversions);ko04120(Ubiquitin mediated proteolysis);ko01100(Metabolic pathways)
PC-3p-12725_949	XM_016112522.2	463	484	474	-39.4	-28.3	0.718274	5.5	1-8,484-477;9-13,475-471;16-21,468-463	x-x,476-476[BULt];14-15,470-469[SIL]	((((((..(((((.((((((((&))))))))-)))))..))))))	GAGAGGAGAAGUCAGGCGGGAA&UUCCCGUC-GACUUGAUCUCUC	1	26.8255	4	0.543133	Output/S24h/cleaveLand_result/t_plot/PC-3p-12725_949_XM_016112522.2_474_TPlot.pdf	0	0	NA	NA	NA	26.8255	0	Inf	up	2.2264e-07	2.57434e-07	yes	GO:0019222(regulation of metabolic process);GO:0031323(regulation of cellular metabolic process);GO:0043226(organelle);GO:0044464(cell part);GO:0060255(regulation of macromolecule metabolic process);GO:0003677(DNA binding);GO:0043231(intracellular membrane-bounded organelle);GO:0003676(nucleic acid binding);GO:0005488(binding);GO:2000112(regulation of cellular macromolecule biosynthetic process);…	ko04016(MAPK signaling pathway - plant)
PC-3p-12725_949	XM_016112605.2	1789	1810	1801	-39.4	-29	0.736041	5.5	1-8,1810-1803;10-14,1801-1797;16-21,1794-1789	9-9,1802-1802[SIL];15-15,1796-1795[AILt]	((((((..(((((.((((((((&)))))))).)))))-.))))))	GAGAGACCCAAGUGGAUGGGAG&UUCCCGUCGACUUG-AUCUCUC	0	0	NA	NA	NA	1	33.3045	4	0.318133	Output/S8h/cleaveLand_result/t_plot/PC-3p-12725_949_XM_016112605.2_1801_TPlot.pdf	0	33.3045	-Inf	down	7.8779e-09	1.51467e-08	yes	GO:0043229(intracellular organelle);GO:0009987(cellular process);GO:0009056(catabolic process);GO:0044424(intracellular part);GO:0043231(intracellular membrane-bounded organelle);GO:0044237(cellular metabolic process);GO:0043226(organelle);GO:0044248(cellular catabolic process);GO:0006914(autophagy);GO:0005622(intracellular);GO:0005623(cell);GO:0044464(cell part);GO:0061919(process utilizing auto…	NA
PC-3p-12725_949	XM_016114216.2	1538	1557	1549	-39.4	-25.8	0.654822	7	1-8,1557-1550;10-18,1549-1541	9-9,x-x[BULq];19-21,1540-1538[UP3]	...(((((((((-((((((((&)))))))).)))))))))...	CCAGGAUCAAGU-GGCGGGAG&UUCCCGUCGACUUGAUCUCUC	1	26.8255	4	0.999978	Output/S24h/cleaveLand_result/t_plot/PC-3p-12725_949_XM_016114216.2_1549_TPlot.pdf	0	0	NA	NA	NA	26.8255	0	Inf	up	2.2264e-07	2.57434e-07	yes	GO:0097159(organic cyclic compound binding);GO:1901363(heterocyclic compound binding);GO:0003723(RNA binding);GO:0005488(binding);GO:0003676(nucleic acid binding)	NA
PC-3p-12725_949	XM_016117149.2	1434	1455	1445	-39.4	-25.8	0.654822	8	1-3,1455-1453;4-9,1451-1446;11-20,1444-1435	x-x,1452-1452[BULt];10-10,1445-1445[SIL];21-21,1434-1434[UP3]	.((((((((((.((((((.(((&)))-)))))).)))))))))).	CGGAGAUUAGGGCGGCGGUGAA&UUC-CCGUCGACUUGAUCUCUC	1	26.8255	4	0.99998	Output/S24h/cleaveLand_result/t_plot/PC-3p-12725_949_XM_016117149.2_1445_TPlot.pdf	5	166.522	2	0.955344	Output/S8h/cleaveLand_result/t_plot/PC-3p-12725_949_XM_016117149.2_1445_TPlot.pdf	26.8255	166.522	-2.63404	down	9.467e-24	2.36675e-22	yes	GO:0034357(photosynthetic membrane);GO:0031967(organelle envelope);GO:0071704(organic substance metabolic process);GO:0044281(small molecule metabolic process);GO:0005506(iron ion binding);GO:0044464(cell part);GO:0044283(small molecule biosynthetic process);GO:0046394(carboxylic acid biosynthetic process);GO:1901576(organic substance biosynthetic process);GO:0005622(intracellular);GO:0008152(met…	ko01100(Metabolic pathways);ko01110(Biosynthesis of secondary metabolites);ko00592(alpha-Linolenic acid metabolism)
PC-3p-12725_949	XM_021132483.1	628	657	648	-39.4	-27.2	0.690355	22.5	1-5,657-653;7-12,651-646;13-21,636-628	6-6,652-652[SIL];x-x,645-637[BULt]	(((((((((.........((((((.(((((&))))).))))))---------)))))))))	GGGAGAUCACACCAUCAUGGUCGGAGGGAA&UUCCCGUCGACU---------UGAUCUCUC	0	0	NA	NA	NA	1	33.3045	4	0.931467	Output/S8h/cleaveLand_result/t_plot/PC-3p-12725_949_XM_021132483.1_648_TPlot.pdf	0	33.3045	-Inf	down	7.8779e-09	1.51467e-08	yes	GO:0003824(catalytic activity);GO:0044260(cellular macromolecule metabolic process);GO:0043169(cation binding);GO:0043170(macromolecule metabolic process);GO:0009056(catabolic process);GO:0032446(protein modification by small protein conjugation);GO:0008152(metabolic process);GO:0036211(protein modification process);GO:0071704(organic substance metabolic process);GO:0051603(proteolysis involved i…	NA
PC-3p-12725_949	XM_021132486.1	443	472	463	-39.4	-27.2	0.690355	22.5	1-5,472-468;7-12,466-461;13-21,451-443	6-6,467-467[SIL];x-x,460-452[BULt]	(((((((((.........((((((.(((((&))))).))))))---------)))))))))	GGGAGAUCACACCAUCAUGGUCGGAGGGAA&UUCCCGUCGACU---------UGAUCUCUC	1	26.8255	4	0.9493	Output/S24h/cleaveLand_result/t_plot/PC-3p-12725_949_XM_021132486.1_463_TPlot.pdf	0	0	NA	NA	NA	26.8255	0	Inf	up	2.2264e-07	2.57434e-07	yes	GO:0003824(catalytic activity);GO:0044260(cellular macromolecule metabolic process);GO:0043169(cation binding);GO:0043170(macromolecule metabolic process);GO:0009056(catabolic process);GO:0032446(protein modification by small protein conjugation);GO:0008152(metabolic process);GO:0036211(protein modification process);GO:0071704(organic substance metabolic process);GO:0051603(proteolysis involved i…	NA
PC-3p-12725_949	XM_021132488.1	388	417	408	-39.4	-27.2	0.690355	22.5	1-5,417-413;7-12,411-406;13-21,396-388	6-6,412-412[SIL];x-x,405-397[BULt]	(((((((((.........((((((.(((((&))))).))))))---------)))))))))	GGGAGAUCACACCAUCAUGGUCGGAGGGAA&UUCCCGUCGACU---------UGAUCUCUC	0	0	NA	NA	NA	1	33.3045	4	0.907691	Output/S8h/cleaveLand_result/t_plot/PC-3p-12725_949_XM_021132488.1_408_TPlot.pdf	0	33.3045	-Inf	down	7.8779e-09	1.51467e-08	yes	GO:0003824(catalytic activity);GO:0044260(cellular macromolecule metabolic process);GO:0043169(cation binding);GO:0043170(macromolecule metabolic process);GO:0009056(catabolic process);GO:0032446(protein modification by small protein conjugation);GO:0008152(metabolic process);GO:0036211(protein modification process);GO:0071704(organic substance metabolic process);GO:0051603(proteolysis involved i…	NA
PC-3p-12725_949	XM_021138127.1	123	147	138	-39.4	-27.3	0.692893	9	1-5,147-143;7-11,141-137;12-15,134-131;16-21,128-123	6-6,142-142[SIL];x-x,136-135[BULt];x-x,130-129[BULt]	((((((..((((..(((((.(((((&))))).)))))--))))--))))))	GAGAGAAAUCAGAUGUCGAGGGGAA&UUCCCGUCGAC--UUGA--UCUCUC	1	26.8255	4	0.936353	Output/S24h/cleaveLand_result/t_plot/PC-3p-12725_949_XM_021138127.1_138_TPlot.pdf	0	0	NA	NA	NA	26.8255	0	Inf	up	2.2264e-07	2.57434e-07	yes	GO:0016021(integral component of membrane);GO:0031224(intrinsic component of membrane);GO:0044425(membrane part);GO:0016020(membrane)	NA
PC-3p-12725_949	XM_021138324.1	515	535	526	-39.4	-27.2	0.690355	5.5	1-12,535-524;15-20,521-516	13-14,523-522[SIL];21-21,515-515[UP3]	.((((((..((((((((((((&))))))))))))..)))))).	UGGAGAUAUAGUUGAUGGGAA&UUCCCGUCGACUUGAUCUCUC	1	26.8255	4	0.959614	Output/S24h/cleaveLand_result/t_plot/PC-3p-12725_949_XM_021138324.1_526_TPlot.pdf	0	0	NA	NA	NA	26.8255	0	Inf	up	2.2264e-07	2.57434e-07	yes	GO:0016787(hydrolase activity);GO:0003824(catalytic activity)	ko00564(Glycerophospholipid metabolism);ko00230(Purine metabolism)
PC-3p-12911_938	BGI_novel_T004127	1589	1610	1600	-28.7	-18.7	0.651568	13	2-9,1609-1602;14-21,1596-1589	1-1,1610-1610[UP5];10-13,1601-1597[AILt]	((((((((.....((((((((.&.))))))))-....))))))))	GCUGAGCUUGGAGAGUUGAAGC&UUUUUAAUU-AAGUAGCUCAGC	0	0	NA	NA	NA	1	33.3045	4	1	Output/S8h/cleaveLand_result/t_plot/PC-3p-12911_938_BGI_novel_T004127_1600_TPlot.pdf	0	33.3045	-Inf	down	7.8779e-09	1.51467e-08	yes	GO:0003723(RNA binding);GO:0097159(organic cyclic compound binding);GO:0003676(nucleic acid binding);GO:1901265(nucleoside phosphate binding);GO:0000166(nucleotide binding);GO:0005488(binding);GO:0036094(small molecule binding);GO:1901363(heterocyclic compound binding)	ko03013(RNA transport);ko03040(Spliceosome);ko03015(mRNA surveillance pathway)
PC-3p-12911_938	BGI_novel_T005230	1162	1182	1173	-28.7	-19.5	0.679443	14.5	7-21,1176-1162	1-6,1182-1177[UP5]	(((((((((((((((......&......)))))))))))))))	GUUGAGUUGCUUGGUGUCAAA&UUUUUAAUUAAGUAGCUCAGC	0	0	NA	NA	NA	1	33.3045	4	0.999998	Output/S8h/cleaveLand_result/t_plot/PC-3p-12911_938_BGI_novel_T005230_1173_TPlot.pdf	0	33.3045	-Inf	down	7.8779e-09	1.51467e-08	yes	NA	NA
PC-3p-12911_938	BGI_novel_T005231	1162	1182	1173	-28.7	-19.5	0.679443	14.5	7-21,1176-1162	1-6,1182-1177[UP5]	(((((((((((((((......&......)))))))))))))))	GUUGAGUUGCUUGGUGUCAAA&UUUUUAAUUAAGUAGCUCAGC	0	0	NA	NA	NA	1	33.3045	4	0.999998	Output/S8h/cleaveLand_result/t_plot/PC-3p-12911_938_BGI_novel_T005231_1173_TPlot.pdf	0	33.3045	-Inf	down	7.8779e-09	1.51467e-08	yes	NA	NA
PC-3p-12911_938	BGI_novel_T006280	815	835	826	-28.7	-18.8	0.655052	15.5	8-16,828-820;18-21,818-815	1-7,835-829[UP5];17-17,819-819[SIL]	((((.(((((((((.......&.......))))))))).))))	GCUGUGCUGCUUGACAACGAA&UUUUUAAUUAAGUAGCUCAGC	0	0	NA	NA	NA	1	33.3045	4	1	Output/S8h/cleaveLand_result/t_plot/PC-3p-12911_938_BGI_novel_T006280_826_TPlot.pdf	0	33.3045	-Inf	down	7.8779e-09	1.51467e-08	yes	GO:0043168(anion binding);GO:0003824(catalytic activity);GO:0032549(ribonucleoside binding);GO:0043232(intracellular non-membrane-bounded organelle);GO:0005198(structural molecule activity);GO:0016818(hydrolase activity, acting on acid anhydrides, in phosphorus-containing anhydrides);GO:0044424(intracellular part);GO:1901265(nucleoside phosphate binding);GO:0032553(ribonucleotide binding);GO:0044…	ko04145(Phagosome)
PC-3p-12911_938	BGI_novel_T006282	815	835	826	-28.7	-18.8	0.655052	15.5	8-16,828-820;18-21,818-815	1-7,835-829[UP5];17-17,819-819[SIL]	((((.(((((((((.......&.......))))))))).))))	GCUGUGCUGCUUGACAACGAA&UUUUUAAUUAAGUAGCUCAGC	0	0	NA	NA	NA	2	66.6089	3	0.88365	Output/S8h/cleaveLand_result/t_plot/PC-3p-12911_938_BGI_novel_T006282_826_TPlot.pdf	0	66.6089	-Inf	down	3.3071e-16	2.22267e-15	yes	GO:0043168(anion binding);GO:0003824(catalytic activity);GO:0032549(ribonucleoside binding);GO:0043232(intracellular non-membrane-bounded organelle);GO:0005198(structural molecule activity);GO:0016818(hydrolase activity, acting on acid anhydrides, in phosphorus-containing anhydrides);GO:0044424(intracellular part);GO:1901265(nucleoside phosphate binding);GO:0032553(ribonucleotide binding);GO:0044…	ko04145(Phagosome)
PC-3p-12911_938	BGI_novel_T006910	84	95	86	-28.7	-20.8	0.724739	3	11-21,94-84	10-10,95-95[SIL]	(((((((((((.&.)))))))))))	GCUGAGCUGCUG&UUUUUAAUUAAG	1	26.8255	4	0.9493	Output/S24h/cleaveLand_result/t_plot/PC-3p-12911_938_BGI_novel_T006910_86_TPlot.pdf	0	0	NA	NA	NA	26.8255	0	Inf	up	2.2264e-07	2.57434e-07	yes	GO:0071702(organic substance transport);GO:0015833(peptide transport);GO:0051179(localization);GO:0072594(establishment of protein localization to organelle);GO:0051651(maintenance of location in cell);GO:0033365(protein localization to organelle);GO:0065007(biological regulation);GO:0005623(cell);GO:0046907(intracellular transport);GO:0045185(maintenance of protein location);GO:0034613(cellular …	NA
PC-3p-12911_938	BGI_novel_T006913	84	95	86	-28.7	-20.8	0.724739	3	11-21,94-84	10-10,95-95[SIL]	(((((((((((.&.)))))))))))	GCUGAGCUGCUG&UUUUUAAUUAAG	2	53.6509	0	0.0349575	Output/S24h/cleaveLand_result/t_plot/PC-3p-12911_938_BGI_novel_T006913_86_TPlot.pdf	0	0	NA	NA	NA	53.6509	0	Inf	up	2.3929e-13	1.027e-12	yes	GO:0071702(organic substance transport);GO:0015833(peptide transport);GO:0051179(localization);GO:0072594(establishment of protein localization to organelle);GO:0051651(maintenance of location in cell);GO:0033365(protein localization to organelle);GO:0065007(biological regulation);GO:0005623(cell);GO:0046907(intracellular transport);GO:0045185(maintenance of protein location);GO:0034613(cellular …	NA
PC-3p-12911_938	BGI_novel_T007392	1269	1289	1280	-28.7	-19.5	0.679443	6.5	1-6,1289-1284;8-9,1282-1281;11-21,1279-1269	7-7,1283-1283[SIL];10-10,1280-1280[SIL]	(((((((((((.((.((((((&)))))).)).)))))))))))	GCUGAGUUACUCAAAUGGAAA&UUUUUAAUUAAGUAGCUCAGC	1	26.8255	4	1	Output/S24h/cleaveLand_result/t_plot/PC-3p-12911_938_BGI_novel_T007392_1280_TPlot.pdf	0	0	NA	NA	NA	26.8255	0	Inf	up	2.2264e-07	2.57434e-07	yes	GO:0005622(intracellular);GO:0007154(cell communication);GO:0044464(cell part);GO:0051345(positive regulation of hydrolase activity);GO:0043085(positive regulation of catalytic activity);GO:0050896(response to stimulus);GO:0065007(biological regulation);GO:0050794(regulation of cellular process);GO:0005623(cell);GO:0007264(small GTPase mediated signal transduction);GO:0065009(regulation of molecu…	NA
PC-3p-12911_938	BGI_novel_T007598	601	621	612	-28.7	-18.94	0.65993	15	1-6,621-616;12-21,610-601	7-11,615-611[SIL]	((((((((((.....((((((&)))))).....))))))))))	GCUGAGCUAUGUCAGUGGGGA&UUUUUAAUUAAGUAGCUCAGC	0	0	NA	NA	NA	1	33.3045	4	1	Output/S8h/cleaveLand_result/t_plot/PC-3p-12911_938_BGI_novel_T007598_612_TPlot.pdf	0	33.3045	-Inf	down	7.8779e-09	1.51467e-08	yes	GO:0044085(cellular component biogenesis);GO:0071704(organic substance metabolic process);GO:0019538(protein metabolic process);GO:0010556(regulation of macromolecule biosynthetic process);GO:0097159(organic cyclic compound binding);GO:0043170(macromolecule metabolic process);GO:0044260(cellular macromolecule metabolic process);GO:0034645(cellular macromolecule biosynthetic process);GO:0044237(ce…	ko03013(RNA transport)
PC-3p-12911_938	BGI_novel_T009578	205	229	218	-28.7	-20.9	0.728223	10	1-6,229-224;7-10,221-218;11-21,215-205	x-x,223-222[BULt];x-x,217-216[BULt]	(((((((((((..((((..((((((&))))))--))))--)))))))))))	GCUGAGCUACUAGUAGUAAUAAGAA&UUUUUA--AUUA--AGUAGCUCAGC	1	26.8255	4	0.927781	Output/S24h/cleaveLand_result/t_plot/PC-3p-12911_938_BGI_novel_T009578_218_TPlot.pdf	0	0	NA	NA	NA	26.8255	0	Inf	up	2.2264e-07	2.57434e-07	yes	GO:0016853(isomerase activity);GO:0000413(protein peptidyl-prolyl isomerization);GO:0071704(organic substance metabolic process);GO:0003755(peptidyl-prolyl cis-trans isomerase activity);GO:0018193(peptidyl-amino acid modification);GO:0009987(cellular process);GO:0044237(cellular metabolic process);GO:0036211(protein modification process);GO:0044260(cellular macromolecule metabolic process);GO:004…	NA
PC-3p-12911_938	BGI_novel_T010837	938	958	949	-28.7	-18.9	0.658537	17.5	9-21,950-938	1-8,958-951[UP5]	(((((((((((((........&........)))))))))))))	GUUGGGCUGCUUGCUCCGGAU&UUUUUAAUUAAGUAGCUCAGC	1	26.8255	4	1	Output/S24h/cleaveLand_result/t_plot/PC-3p-12911_938_BGI_novel_T010837_949_TPlot.pdf	0	0	NA	NA	NA	26.8255	0	Inf	up	2.2264e-07	2.57434e-07	yes	GO:0009221(pyrimidine deoxyribonucleotide biosynthetic process);GO:0043168(anion binding);GO:0005737(cytoplasm);GO:0044444(cytoplasmic part);GO:0009262(deoxyribonucleotide metabolic process);GO:1901576(organic substance biosynthetic process);GO:0009165(nucleotide biosynthetic process);GO:0016772(transferase activity, transferring phosphorus-containing groups);GO:0017076(purine nucleotide binding)…	ko01100(Metabolic pathways);ko00240(Pyrimidine metabolism)
PC-3p-12911_938	XM_016076863.2	205	229	218	-28.7	-20.9	0.728223	10	1-6,229-224;7-10,221-218;11-21,215-205	x-x,223-222[BULt];x-x,217-216[BULt]	(((((((((((..((((..((((((&))))))--))))--)))))))))))	GCUGAGCUACUAGUAGUAAUAAGAA&UUUUUA--AUUA--AGUAGCUCAGC	1	26.8255	4	0.924038	Output/S24h/cleaveLand_result/t_plot/PC-3p-12911_938_XM_016076863.2_218_TPlot.pdf	0	0	NA	NA	NA	26.8255	0	Inf	up	2.2264e-07	2.57434e-07	yes	GO:0016853(isomerase activity);GO:0000413(protein peptidyl-prolyl isomerization);GO:0071704(organic substance metabolic process);GO:0003755(peptidyl-prolyl cis-trans isomerase activity);GO:0018193(peptidyl-amino acid modification);GO:0009987(cellular process);GO:0044237(cellular metabolic process);GO:0036211(protein modification process);GO:0044260(cellular macromolecule metabolic process);GO:004…	NA
PC-3p-12911_938	XM_016077070.2	1016	1027	1018	-28.7	-19.7	0.686411	4	11-21,1026-1016	10-10,1027-1027[SIL]	(((((((((((.&.)))))))))))	GCUGGGCUGCUA&UUUUUAAUUAAG	1	26.8255	4	0.999998	Output/S24h/cleaveLand_result/t_plot/PC-3p-12911_938_XM_016077070.2_1018_TPlot.pdf	0	0	NA	NA	NA	26.8255	0	Inf	up	2.2264e-07	2.57434e-07	yes	GO:0031224(intrinsic component of membrane);GO:0016021(integral component of membrane);GO:0016020(membrane);GO:0044425(membrane part)	NA
PC-3p-12911_938	XM_016078799.2	1982	2003	1994	-28.7	-19.1	0.665505	7	1-7,2003-1997;9-17,1995-1987;18-20,1985-1983	8-8,1996-1996[SIL];x-x,1986-1986[BULt];21-21,1982-1982[UP3]	.(((.(((((((((.(((((((&))))))).)))))))))-))).	ACUGUAGCUACUUGCUUGAAGA&UUUUUAAUUAAGUAGCU-CAGC	0	0	NA	NA	NA	1	33.3045	4	1	Output/S8h/cleaveLand_result/t_plot/PC-3p-12911_938_XM_016078799.2_1994_TPlot.pdf	0	33.3045	-Inf	down	7.8779e-09	1.51467e-08	yes	GO:0006796(phosphate-containing compound metabolic process);GO:0004722(protein serine/threonine phosphatase activity);GO:0016791(phosphatase activity);GO:0009987(cellular process);GO:0036211(protein modification process);GO:0016787(hydrolase activity);GO:0044238(primary metabolic process);GO:0008152(metabolic process);GO:0006793(phosphorus metabolic process);GO:0006807(nitrogen compound metabolic…	NA
PC-3p-12911_938	XM_016079082.2	753	775	765	-28.7	-20.1	0.700348	11.5	1-8,775-768;11-16,764-759;17-21,757-753	9-10,767-765[AILt];x-x,758-758[BULt]	(((((.((((((...((((((((&))))))))-..))))))-)))))	GCUGGUGCUACUGCUGUUGAGGA&UUUUUAAU-UAAGUAGC-UCAGC	1	26.8255	4	0.999879	Output/S24h/cleaveLand_result/t_plot/PC-3p-12911_938_XM_016079082.2_765_TPlot.pdf	0	0	NA	NA	NA	26.8255	0	Inf	up	2.2264e-07	2.57434e-07	yes	GO:0016684(oxidoreductase activity, acting on peroxide as acceptor);GO:0003824(catalytic activity);GO:1901363(heterocyclic compound binding);GO:0016491(oxidoreductase activity);GO:0042221(response to chemical);GO:0009636(response to toxic substance);GO:1990748(cellular detoxification);GO:0098754(detoxification);GO:0004601(peroxidase activity);GO:0050896(response to stimulus);GO:0046906(tetrapyrro…	ko00053(Ascorbate and aldarate metabolism);ko00480(Glutathione metabolism)
PC-3p-12911_938	XM_016083951.1	1296	1306	1297	-28.7	-19.4	0.675958	2	12-21,1305-1296	11-11,1306-1306[SIL]	((((((((((.&.))))))))))	GCUGAGCUACG&UUUUUAAUUAA	1	26.8255	4	1	Output/S24h/cleaveLand_result/t_plot/PC-3p-12911_938_XM_016083951.1_1297_TPlot.pdf	0	0	NA	NA	NA	26.8255	0	Inf	up	2.2264e-07	2.57434e-07	yes	NA	NA
PC-3p-12911_938	XM_016084585.2	997	1019	1009	-28.7	-20.4	0.710801	8.5	2-9,1018-1011;11-17,1008-1002;18-21,1000-997	1-1,1019-1019[UP5];10-10,1010-1009[AILt];x-x,1001-1001[BULt]	((((.(((((((..((((((((.&.))))))))-.)))))))-))))	GCUGCAGCUGCUGCAAUUAGGAU&UUUUUAAUU-AAGUAGCU-CAGC	2	53.6509	3	0.484604	Output/S24h/cleaveLand_result/t_plot/PC-3p-12911_938_XM_016084585.2_1009_TPlot.pdf	0	0	NA	NA	NA	53.6509	0	Inf	up	2.3929e-13	1.027e-12	yes	GO:0004124(cysteine synthase activity);GO:1901564(organonitrogen compound metabolic process);GO:0006535(cysteine biosynthetic process from serine);GO:0044272(sulfur compound biosynthetic process);GO:0019752(carboxylic acid metabolic process);GO:0006807(nitrogen compound metabolic process);GO:0016829(lyase activity);GO:0044283(small molecule biosynthetic process);GO:0044281(small molecule metaboli…	ko00270(Cysteine and methionine metabolism);ko01200(Carbon metabolism);ko01110(Biosynthesis of secondary metabolites);ko01100(Metabolic pathways);ko01230(Biosynthesis of amino acids);ko00920(Sulfur metabolism)
PC-3p-12911_938	XM_016085125.2	2427	2447	2438	-28.7	-22.2	0.773519	7.5	2-18,2446-2430	1-1,2447-2447[UP5];19-21,2429-2427[UP3]	...(((((((((((((((((.&.)))))))))))))))))...	UAAGAGCUGCUUGAUUGAAGC&UUUUUAAUUAAGUAGCUCAGC	1	26.8255	4	0.494539	Output/S24h/cleaveLand_result/t_plot/PC-3p-12911_938_XM_016085125.2_2438_TPlot.pdf	0	0	NA	NA	NA	26.8255	0	Inf	up	2.2264e-07	2.57434e-07	yes	GO:0044464(cell part);GO:0044424(intracellular part);GO:0016192(vesicle-mediated transport);GO:0022406(membrane docking);GO:0006904(vesicle docking involved in exocytosis);GO:0032940(secretion by cell);GO:0005623(cell);GO:0000145(exocyst);GO:0043234(protein complex);GO:0051179(localization);GO:0046903(secretion);GO:0006887(exocytosis);GO:0071944(cell periphery);GO:0099023(tethering complex);GO:00…	NA
PC-3p-12911_938	XM_016086461.2	3691	3712	3702	-28.7	-18.9	0.658537	10.5	1-6,3712-3707;9-21,3703-3691	7-8,3706-3704[AILt]	(((((((((((((...((((((&))))))-..)))))))))))))	GUUGAGCUAUUUAUUGUGAGGA&UUUUUA-AUUAAGUAGCUCAGC	0	0	NA	NA	NA	1	33.3045	4	1	Output/S8h/cleaveLand_result/t_plot/PC-3p-12911_938_XM_016086461.2_3702_TPlot.pdf	0	33.3045	-Inf	down	7.8779e-09	1.51467e-08	yes	GO:0071704(organic substance metabolic process);GO:0044389(ubiquitin-like protein ligase binding);GO:0019538(protein metabolic process);GO:0005622(intracellular);GO:0003824(catalytic activity);GO:0016740(transferase activity);GO:0044424(intracellular part);GO:0036211(protein modification process);GO:0019899(enzyme binding);GO:0031625(ubiquitin protein ligase binding);GO:0070647(protein modificati…	ko04120(Ubiquitin mediated proteolysis)
PC-3p-12911_938	XM_016086511.1	815	837	828	-28.7	-21.3	0.74216	10	4-16,834-822;17-21,819-815	1-3,837-835[UP5];x-x,821-820[BULt]	(((((..(((((((((((((...&...)))))))))))))--)))))	GCUGAUAGCUACUUGGUUAGCUC&UUUUUAAUUAAGUAGC--UCAGC	5	134.127	3	0.150574	Output/S24h/cleaveLand_result/t_plot/PC-3p-12911_938_XM_016086511.1_828_TPlot.pdf	1	33.3045	4	0.749117	Output/S8h/cleaveLand_result/t_plot/PC-3p-12911_938_XM_016086511.1_828_TPlot.pdf	134.127	33.3045	2.00982	up	6.5869e-15	4.35308e-14	yes	GO:0043167(ion binding);GO:0008270(zinc ion binding);GO:0052747(sinapyl alcohol dehydrogenase activity);GO:0008152(metabolic process);GO:0016616(oxidoreductase activity, acting on the CH-OH group of donors, NAD or NADP as acceptor);GO:0043169(cation binding);GO:0016614(oxidoreductase activity, acting on CH-OH group of donors);GO:0046914(transition metal ion binding);GO:0016491(oxidoreductase acti…	ko01100(Metabolic pathways);ko00940(Phenylpropanoid biosynthesis);ko01110(Biosynthesis of secondary metabolites)
PC-3p-12911_938	XM_016087549.2	699	718	710	-28.7	-20.1	0.700348	5	1-8,718-711;10-18,710-702;20-21,700-699	9-9,x-x[BULq];19-19,701-701[SIL]	((.(((((((((-((((((((&)))))))).))))))))).))	GCAGAGCUACUU-AUUGGAAA&UUUUUAAUUAAGUAGCUCAGC	1	26.8255	4	0.999885	Output/S24h/cleaveLand_result/t_plot/PC-3p-12911_938_XM_016087549.2_710_TPlot.pdf	0	0	NA	NA	NA	26.8255	0	Inf	up	2.2264e-07	2.57434e-07	yes	GO:0016301(kinase activity);GO:0032553(ribonucleotide binding);GO:0036211(protein modification process);GO:0043168(anion binding);GO:0019538(protein metabolic process);GO:0008152(metabolic process);GO:0043412(macromolecule modification);GO:0005488(binding);GO:0043170(macromolecule metabolic process);GO:1901265(nucleoside phosphate binding);GO:0006796(phosphate-containing compound metabolic proces…	NA
PC-3p-12911_938	XM_016087626.2	497	518	509	-28.7	-20.2	0.703833	8.5	1-5,518-514;7-18,512-501;20-21,498-497	6-6,513-513[SIL];19-19,500-499[AILt]	((..((((((((((((.(((((&))))).))))))))))))-.))	GCCGGAGCUGCUUGAUGAGGGA&UUUUUAAUUAAGUAGCUC-AGC	0	0	NA	NA	NA	1	33.3045	4	0.998963	Output/S8h/cleaveLand_result/t_plot/PC-3p-12911_938_XM_016087626.2_509_TPlot.pdf	0	33.3045	-Inf	down	7.8779e-09	1.51467e-08	yes	NA	NA
PC-3p-12911_938	XM_016090739.2	902	923	914	-28.7	-19.3	0.672474	11	4-13,920-911;14-20,909-903	1-3,923-921[UP5];x-x,910-910[BULt];21-21,902-902[UP3]	.(((((((.((((((((((...&...))))))))))-))))))).	ACUGGGCUGGCUUGGUUGACCG&UUUUUAAUUAAGU-AGCUCAGC	1	26.8255	4	1	Output/S24h/cleaveLand_result/t_plot/PC-3p-12911_938_XM_016090739.2_914_TPlot.pdf	0	0	NA	NA	NA	26.8255	0	Inf	up	2.2264e-07	2.57434e-07	yes	GO:0003824(catalytic activity);GO:0031224(intrinsic component of membrane);GO:0044425(membrane part);GO:0016021(integral component of membrane);GO:0016757(transferase activity, transferring glycosyl groups);GO:0016020(membrane);GO:0016740(transferase activity)	NA
PC-3p-12911_938	XM_016093975.2	1818	1838	1829	-28.7	-19	0.662021	15	8-13,1831-1826;15-21,1824-1818	1-7,1838-1832[UP5];14-14,1825-1825[SIL]	(((((((.((((((.......&.......)))))).)))))))	GCUGAGCAACUUGAAGCAGCA&UUUUUAAUUAAGUAGCUCAGC	1	26.8255	4	1	Output/S24h/cleaveLand_result/t_plot/PC-3p-12911_938_XM_016093975.2_1829_TPlot.pdf	0	0	NA	NA	NA	26.8255	0	Inf	up	2.2264e-07	2.57434e-07	yes	GO:0032549(ribonucleoside binding);GO:0000166(nucleotide binding);GO:0043168(anion binding);GO:0097367(carbohydrate derivative binding);GO:0019001(guanyl nucleotide binding);GO:0036094(small molecule binding);GO:0032555(purine ribonucleotide binding);GO:0005488(binding);GO:0017076(purine nucleotide binding);GO:0001883(purine nucleoside binding);GO:0016787(hydrolase activity);GO:0032550(purine rib…	NA
PC-3p-12911_938	XM_016095046.2	1310	1329	1320	-28.7	-20.4	0.710801	6	1-12,1329-1318;15-21,1316-1310	13-14,1317-1317[AILq]	(((((((.-((((((((((((&))))))))))))..)))))))	GCUGAGCC-UUUGAUUGAAGA&UUUUUAAUUAAGUAGCUCAGC	0	0	NA	NA	NA	2	66.6089	2	0.858276	Output/S8h/cleaveLand_result/t_plot/PC-3p-12911_938_XM_016095046.2_1320_TPlot.pdf	0	66.6089	-Inf	down	3.3071e-16	2.22267e-15	yes	GO:0008168(methyltransferase activity);GO:0003824(catalytic activity);GO:0016741(transferase activity, transferring one-carbon groups);GO:0008152(metabolic process);GO:0016740(transferase activity);GO:0032259(methylation);GO:0016021(integral component of membrane);GO:0044425(membrane part);GO:0031224(intrinsic component of membrane);GO:0016020(membrane)	NA
PC-3p-12911_938	XM_016096457.2	1794	1819	1810	-28.7	-18.8	0.655052	12	2-13,1818-1807;14-21,1801-1794	1-1,1819-1819[UP5];x-x,1806-1802[BULt]	((((((((.....((((((((((((.&.))))))))))))-----))))))))	GUUGGGCUUCAGUACUUGGUUGAGGC&UUUUUAAUUAAGU-----AGCUCAGC	2	53.6509	3	0.939611	Output/S24h/cleaveLand_result/t_plot/PC-3p-12911_938_XM_016096457.2_1810_TPlot.pdf	9	299.74	2	0.999703	Output/S8h/cleaveLand_result/t_plot/PC-3p-12911_938_XM_016096457.2_1810_TPlot.pdf	53.6509	299.74	-2.48204	down	3.6625e-39	3.13457e-37	yes	GO:0016830(carbon-carbon lyase activity);GO:0009445(putrescine metabolic process);GO:0009056(catabolic process);GO:0003824(catalytic activity);GO:0044237(cellular metabolic process);GO:0006596(polyamine biosynthetic process);GO:0006595(polyamine metabolic process);GO:0006525(arginine metabolic process);GO:0044281(small molecule metabolic process);GO:0044249(cellular biosynthetic process);GO:19015…	ko01100(Metabolic pathways);ko00330(Arginine and proline metabolism)
PC-3p-12911_938	XM_016097338.2	895	920	907	-28.7	-19.66	0.685017	15.5	1-6,920-915;9-14,908-903;15-21,901-895	7-8,914-909[AILt];x-x,902-902[BULt]	(((((((.((((((......((((((&))))))----..))))))-)))))))	GCUGAGCUUGCUUAUGUGGGUGAAGA&UUUUUA----AUUAAGUA-GCUCAGC	2	53.6509	2	0.99039	Output/S24h/cleaveLand_result/t_plot/PC-3p-12911_938_XM_016097338.2_907_TPlot.pdf	0	0	NA	NA	NA	53.6509	0	Inf	up	2.3929e-13	1.027e-12	yes	GO:0005355(glucose transmembrane transporter activity);GO:0005215(transporter activity);GO:1904659(glucose transmembrane transport);GO:0015749(monosaccharide transport);GO:0005623(cell);GO:0055085(transmembrane transport);GO:0015144(carbohydrate transmembrane transporter activity);GO:0005402(cation:sugar symporter activity);GO:0015294(solute:cation symporter activity);GO:0015075(ion transmembrane…	NA
PC-3p-12911_938	XM_016100158.2	988	1008	999	-28.7	-19.04	0.663415	12.5	1-5,1008-1004;11-21,998-988	6-10,1003-999[SIL]	(((((((((((.....(((((&))))).....)))))))))))	GCUGAGUUACUCGAAGGAGAA&UUUUUAAUUAAGUAGCUCAGC	5	134.127	2	0.999627	Output/S24h/cleaveLand_result/t_plot/PC-3p-12911_938_XM_016100158.2_999_TPlot.pdf	0	0	NA	NA	NA	134.127	0	Inf	up	5.1009e-31	2.38712e-29	yes	NA	NA
PC-3p-12911_938	XM_016101082.2	1413	1435	1426	-28.7	-19.2	0.66899	8	2-14,1434-1422;15-16,1420-1419;17-21,1417-1413	1-1,1435-1435[UP5];x-x,1421-1421[BULt];x-x,1418-1418[BULt]	(((((.((.(((((((((((((.&.)))))))))))))-))-)))))	GUUGAUGCAUGCUUGGUUGAGAC&UUUUUAAUUAAGUA-GC-UCAGC	1	26.8255	4	1	Output/S24h/cleaveLand_result/t_plot/PC-3p-12911_938_XM_016101082.2_1426_TPlot.pdf	0	0	NA	NA	NA	26.8255	0	Inf	up	2.2264e-07	2.57434e-07	yes	GO:0008270(zinc ion binding);GO:0005488(binding);GO:0046872(metal ion binding);GO:0043167(ion binding);GO:0043169(cation binding);GO:0046914(transition metal ion binding)	ko03008(Ribosome biogenesis in eukaryotes)
PC-3p-12911_938	XM_016101256.2	736	757	747	-28.7	-18.7	0.651568	13	2-9,756-749;14-21,743-736	1-1,757-757[UP5];10-13,748-744[AILt]	((((((((.....((((((((.&.))))))))-....))))))))	GCUGAGCUUGGAGAGUUGAAGC&UUUUUAAUU-AAGUAGCUCAGC	1	26.8255	4	1	Output/S24h/cleaveLand_result/t_plot/PC-3p-12911_938_XM_016101256.2_747_TPlot.pdf	0	0	NA	NA	NA	26.8255	0	Inf	up	2.2264e-07	2.57434e-07	yes	GO:0003723(RNA binding);GO:0097159(organic cyclic compound binding);GO:0003676(nucleic acid binding);GO:1901265(nucleoside phosphate binding);GO:0000166(nucleotide binding);GO:0005488(binding);GO:0036094(small molecule binding);GO:1901363(heterocyclic compound binding)	ko03013(RNA transport);ko03040(Spliceosome);ko03015(mRNA surveillance pathway)
PC-3p-12911_938	XM_016103878.2	530	550	541	-28.7	-19	0.662021	13	6-11,545-540;14-21,537-530	1-5,550-546[UP5];12-13,539-538[SIL]	((((((((..((((((.....&.....))))))..))))))))	GCUGAGCUUAUUGAUUCCGUU&UUUUUAAUUAAGUAGCUCAGC	0	0	NA	NA	NA	3	99.9134	2	0.998924	Output/S8h/cleaveLand_result/t_plot/PC-3p-12911_938_XM_016103878.2_541_TPlot.pdf	0	99.9134	-Inf	down	1.5881e-23	2.78872e-22	yes	GO:0097367(carbohydrate derivative binding);GO:0005200(structural constituent of cytoskeleton);GO:0016817(hydrolase activity, acting on acid anhydrides);GO:0016462(pyrophosphatase activity);GO:0032553(ribonucleotide binding);GO:0001883(purine nucleoside binding);GO:0005737(cytoplasm);GO:0017111(nucleoside-triphosphatase activity);GO:0044464(cell part);GO:0005622(intracellular);GO:0005874(microtub…	ko04145(Phagosome)
PC-3p-12911_938	XM_016105962.2	1285	1310	1301	-28.7	-18.7	0.651568	17	7-13,1304-1298;14-21,1292-1285	1-6,1310-1305[UP5];x-x,1297-1293[BULt]	((((((((.....(((((((......&......)))))))-----))))))))	GCUGAGCUAUUUCACUUGAUGUUUCU&UUUUUAAUUAAGU-----AGCUCAGC	3	80.4764	0	0.241056	Output/S24h/cleaveLand_result/t_plot/PC-3p-12911_938_XM_016105962.2_1301_TPlot.pdf	0	0	NA	NA	NA	80.4764	0	Inf	up	2.9371e-19	3.48128e-18	yes	GO:1901363(heterocyclic compound binding);GO:0005488(binding);GO:0003677(DNA binding);GO:0097159(organic cyclic compound binding);GO:0003676(nucleic acid binding)	NA
PC-3p-12911_938	XM_016107856.2	1026	1046	1037	-28.7	-19.5	0.679443	13.5	7-13,1040-1034;15-21,1032-1026	1-6,1046-1041[UP5];14-14,1033-1033[SIL]	(((((((.(((((((......&......))))))).)))))))	GCUGGGCGACUUGAUGAAGCU&UUUUUAAUUAAGUAGCUCAGC	1	26.8255	4	1	Output/S24h/cleaveLand_result/t_plot/PC-3p-12911_938_XM_016107856.2_1037_TPlot.pdf	0	0	NA	NA	NA	26.8255	0	Inf	up	2.2264e-07	2.57434e-07	yes	NA	NA
PC-3p-12911_938	XM_016108272.2	850	870	861	-28.7	-18.8	0.655052	15.5	8-16,863-855;18-21,853-850	1-7,870-864[UP5];17-17,854-854[SIL]	((((.(((((((((.......&.......))))))))).))))	GCUGUGCUGCUUGACAACGAA&UUUUUAAUUAAGUAGCUCAGC	0	0	NA	NA	NA	2	66.6089	3	0.900367	Output/S8h/cleaveLand_result/t_plot/PC-3p-12911_938_XM_016108272.2_861_TPlot.pdf	0	66.6089	-Inf	down	3.3071e-16	2.22267e-15	yes	GO:0043168(anion binding);GO:0003824(catalytic activity);GO:0032549(ribonucleoside binding);GO:0043232(intracellular non-membrane-bounded organelle);GO:0005198(structural molecule activity);GO:0016818(hydrolase activity, acting on acid anhydrides, in phosphorus-containing anhydrides);GO:0044424(intracellular part);GO:1901265(nucleoside phosphate binding);GO:0032553(ribonucleotide binding);GO:0044…	ko04145(Phagosome)
PC-3p-12911_938	XM_016109009.2	1020	1040	1031	-28.7	-19.5	0.679443	7	3-12,1038-1029;14-17,1028-1025;18-21,1023-1020	1-2,1040-1039[UP5];13-13,x-x[BULq];x-x,1024-1024[BULt]	((((.((((-((((((((((..&..)))))))))).))))-))))	GCUGAAGCU-CUUAAUUGGACA&UUUUUAAUUAAGUAGCU-CAGC	1	26.8255	4	1	Output/S24h/cleaveLand_result/t_plot/PC-3p-12911_938_XM_016109009.2_1031_TPlot.pdf	0	0	NA	NA	NA	26.8255	0	Inf	up	2.2264e-07	2.57434e-07	yes	NA	ko04626(Plant-pathogen interaction)
PC-3p-12911_938	XM_016109337.2	255	265	256	-28.7	-19.5	0.679443	3	12-21,264-255	11-11,265-265[SIL]	((((((((((.&.))))))))))	GCUGAGCUGCA&UUUUUAAUUAA	0	0	NA	NA	NA	1	33.3045	4	0.999998	Output/S8h/cleaveLand_result/t_plot/PC-3p-12911_938_XM_016109337.2_256_TPlot.pdf	0	33.3045	-Inf	down	7.8779e-09	1.51467e-08	yes	GO:0030554(adenyl nucleotide binding);GO:0036094(small molecule binding);GO:1901363(heterocyclic compound binding);GO:0005488(binding);GO:0032553(ribonucleotide binding);GO:0097367(carbohydrate derivative binding);GO:0005515(protein binding);GO:0032559(adenyl ribonucleotide binding);GO:0000166(nucleotide binding);GO:0097159(organic cyclic compound binding);GO:0032555(purine ribonucleotide binding…	NA
PC-3p-12911_938	XM_016109458.2	2330	2354	2340	-28.7	-19.6	0.682927	12.5	1-8,2354-2347;9-16,2341-2334;18-21,2333-2330	x-x,2346-2342[BULt];17-17,x-x[BULq]	((((-((((((((.....((((((((&))))))))-----)))))))).))))	GCUG-GCUGCUUAGAGAAGUUAAAAA&UUUUUAAU-----UAAGUAGCUCAGC	1	26.8255	4	0.999999	Output/S24h/cleaveLand_result/t_plot/PC-3p-12911_938_XM_016109458.2_2340_TPlot.pdf	0	0	NA	NA	NA	26.8255	0	Inf	up	2.2264e-07	2.57434e-07	yes	GO:0097159(organic cyclic compound binding);GO:0030554(adenyl nucleotide binding);GO:0036094(small molecule binding);GO:0005524(ATP binding);GO:0017076(purine nucleotide binding);GO:0032555(purine ribonucleotide binding);GO:1901363(heterocyclic compound binding);GO:0035639(purine ribonucleoside triphosphate binding);GO:1901265(nucleoside phosphate binding);GO:0003824(catalytic activity);GO:003255…	ko03440(Homologous recombination)
PC-3p-12911_938	XM_016112375.2	1417	1427	1418	-28.7	-18.8	0.655052	2	12-21,1426-1417	11-11,1427-1427[SIL]	((((((((((.&.))))))))))	GCUGAGCUACC&UUUUUAAUUAA	1	26.8255	4	1	Output/S24h/cleaveLand_result/t_plot/PC-3p-12911_938_XM_016112375.2_1418_TPlot.pdf	0	0	NA	NA	NA	26.8255	0	Inf	up	2.2264e-07	2.57434e-07	yes	GO:0065007(biological regulation);GO:0015698(inorganic anion transport);GO:0016020(membrane);GO:0022832(voltage-gated channel activity);GO:0005216(ion channel activity);GO:0034762(regulation of transmembrane transport);GO:0022838(substrate-specific channel activity);GO:0051234(establishment of localization);GO:0015103(inorganic anion transmembrane transporter activity);GO:0016021(integral compone…	NA
PC-3p-12911_938	XM_016113396.2	2186	2206	2198	-28.7	-19	0.662021	8	1-6,2206-2201;9-18,2199-2190;19-21,2188-2186	7-8,2200-2200[AILq];x-x,2189-2189[BULt]	(((.((((((((((.-((((((&))))))..))))))))))-)))	GCUGGAGCUGCUUAC-UGGAAG&UUUUUAAUUAAGUAGCUC-AGC	1	26.8255	4	1	Output/S24h/cleaveLand_result/t_plot/PC-3p-12911_938_XM_016113396.2_2198_TPlot.pdf	0	0	NA	NA	NA	26.8255	0	Inf	up	2.2264e-07	2.57434e-07	yes	GO:0004674(protein serine/threonine kinase activity);GO:0016773(phosphotransferase activity, alcohol group as acceptor);GO:0036211(protein modification process);GO:0016310(phosphorylation);GO:0030554(adenyl nucleotide binding);GO:0032555(purine ribonucleotide binding);GO:0044237(cellular metabolic process);GO:0071704(organic substance metabolic process);GO:0097367(carbohydrate derivative binding)…	NA
PC-3p-12911_938	XM_016113512.1	874	894	885	-28.7	-19.1	0.665505	12	6-19,889-876	1-5,894-890[UP5];20-21,875-874[UP3]	..((((((((((((((.....&.....))))))))))))))..	UGUGAGCUACUUGAUUCCAUC&UUUUUAAUUAAGUAGCUCAGC	4	107.302	2	0.999479	Output/S24h/cleaveLand_result/t_plot/PC-3p-12911_938_XM_016113512.1_885_TPlot.pdf	0	0	NA	NA	NA	107.302	0	Inf	up	3.8116e-25	9.90703e-24	yes	GO:0043167(ion binding);GO:1901575(organic substance catabolic process);GO:0005623(cell);GO:0061630(ubiquitin protein ligase activity);GO:0071704(organic substance metabolic process);GO:0006807(nitrogen compound metabolic process);GO:0043161(proteasome-mediated ubiquitin-dependent protein catabolic process);GO:0009057(macromolecule catabolic process);GO:0043227(membrane-bounded organelle);GO:0016…	NA
PC-3p-12911_938	XM_016113514.2	4005	4025	4016	-28.7	-20.1	0.700348	6.5	1-8,4025-4018;10-19,4016-4007	9-9,4017-4017[SIL];20-21,4006-4005[UP3]	..((((((((((.((((((((&)))))))).))))))))))..	CAUGAGCUGCUUCAUUGAGAA&UUUUUAAUUAAGUAGCUCAGC	0	0	NA	NA	NA	1	33.3045	4	0.999538	Output/S8h/cleaveLand_result/t_plot/PC-3p-12911_938_XM_016113514.2_4016_TPlot.pdf	0	33.3045	-Inf	down	7.8779e-09	1.51467e-08	yes	GO:0016020(membrane);GO:0042623(ATPase activity, coupled);GO:0000166(nucleotide binding);GO:0016818(hydrolase activity, acting on acid anhydrides, in phosphorus-containing anhydrides);GO:0016462(pyrophosphatase activity);GO:0097159(organic cyclic compound binding);GO:0016887(ATPase activity);GO:0022857(transmembrane transporter activity);GO:0015399(primary active transmembrane transporter activit…	ko02010(ABC transporters)
PC-3p-12911_938	XM_016113915.2	504	523	515	-28.7	-20.1	0.700348	9.5	1-8,523-516;12-21,513-504	9-11,515-514[AILq]	((((((((((..-((((((((&))))))))...))))))))))	GUUGAGCUACCC-GUUAGAGA&UUUUUAAUUAAGUAGCUCAGC	1	26.8255	4	0.999906	Output/S24h/cleaveLand_result/t_plot/PC-3p-12911_938_XM_016113915.2_515_TPlot.pdf	0	0	NA	NA	NA	26.8255	0	Inf	up	2.2264e-07	2.57434e-07	yes	NA	ko00970(Aminoacyl-tRNA biosynthesis)
PC-3p-12911_938	XM_016114808.2	1645	1665	1656	-28.7	-20	0.696864	16	9-21,1657-1645	1-8,1665-1658[UP5]	(((((((((((((........&........)))))))))))))	GCUGAGUUGCUUAUGGAUUUC&UUUUUAAUUAAGUAGCUCAGC	2	53.6509	2	0.963813	Output/S24h/cleaveLand_result/t_plot/PC-3p-12911_938_XM_016114808.2_1656_TPlot.pdf	0	0	NA	NA	NA	53.6509	0	Inf	up	2.3929e-13	1.027e-12	yes	GO:0008270(zinc ion binding);GO:0043167(ion binding);GO:0046914(transition metal ion binding);GO:0043169(cation binding);GO:0005488(binding);GO:0046872(metal ion binding)	NA
PC-3p-12911_938	XM_016115841.2	209	219	210	-28.7	-19.6	0.682927	2	12-21,218-209	11-11,219-219[SIL]	((((((((((.&.))))))))))	GCUGAGCUACA&UUUUUAAUUAA	0	0	NA	NA	NA	1	33.3045	4	0.999994	Output/S8h/cleaveLand_result/t_plot/PC-3p-12911_938_XM_016115841.2_210_TPlot.pdf	0	33.3045	-Inf	down	7.8779e-09	1.51467e-08	yes	NA	NA
PC-3p-12911_938	XM_016116124.2	1575	1595	1586	-28.7	-21	0.731707	12	6-10,1590-1586;12-21,1584-1575	1-5,1595-1591[UP5];11-11,1585-1585[SIL]	((((((((((.(((((.....&.....))))).))))))))))	GCUGAGCUACAUAGUUCGUAC&UUUUUAAUUAAGUAGCUCAGC	1	26.8255	4	0.909339	Output/S24h/cleaveLand_result/t_plot/PC-3p-12911_938_XM_016116124.2_1586_TPlot.pdf	1	33.3045	4	0.867473	Output/S8h/cleaveLand_result/t_plot/PC-3p-12911_938_XM_016116124.2_1586_TPlot.pdf	26.8255	33.3045	-0.312112	down	0.40341	0.405116	yes	GO:0016020(membrane)	NA
PC-3p-12911_938	XM_016116827.2	257	276	268	-28.7	-19.7	0.686411	11	3-9,274-268;12-21,266-257	1-2,276-275[UP5];10-11,267-267[AILq]	((((((((((.-(((((((..&..)))))))..))))))))))	GCUGAGUUGCG-AGUUGAGUU&UUUUUAAUUAAGUAGCUCAGC	1	26.8255	4	0.999998	Output/S24h/cleaveLand_result/t_plot/PC-3p-12911_938_XM_016116827.2_268_TPlot.pdf	0	0	NA	NA	NA	26.8255	0	Inf	up	2.2264e-07	2.57434e-07	yes	GO:0031224(intrinsic component of membrane);GO:0016020(membrane);GO:0044425(membrane part);GO:0016021(integral component of membrane)	ko04016(MAPK signaling pathway - plant)
PC-3p-12911_938	XM_016117748.2	303	322	314	-28.7	-22	0.766551	6	2-6,321-317;8-21,316-303	1-1,322-322[UP5];7-7,x-x[BULq]	((((((((((((((-(((((.&.))))).))))))))))))))	GCUGAGUUGCUUGG-UAAAAU&UUUUUAAUUAAGUAGCUCAGC	0	0	NA	NA	NA	1	33.3045	4	0.471758	Output/S8h/cleaveLand_result/t_plot/PC-3p-12911_938_XM_016117748.2_314_TPlot.pdf	0	33.3045	-Inf	down	7.8779e-09	1.51467e-08	yes	NA	NA
PC-3p-12911_938	XM_016117918.2	344	364	355	-28.7	-22.88	0.797213	8.5	1-5,364-360;9-21,356-344	6-8,359-357[SIL]	(((((((((((((...(((((&)))))...)))))))))))))	GCUGGGCUACUUACAGAGAGA&UUUUUAAUUAAGUAGCUCAGC	1	26.8255	4	0.332567	Output/S24h/cleaveLand_result/t_plot/PC-3p-12911_938_XM_016117918.2_355_TPlot.pdf	0	0	NA	NA	NA	26.8255	0	Inf	up	2.2264e-07	2.57434e-07	yes	GO:0008270(zinc ion binding);GO:0043169(cation binding);GO:0043167(ion binding);GO:0046872(metal ion binding);GO:0046914(transition metal ion binding);GO:0005488(binding)	NA
PC-3p-12911_938	XM_021127209.1	385	405	396	-28.7	-22.88	0.797213	8.5	1-5,405-401;9-21,397-385	6-8,400-398[SIL]	(((((((((((((...(((((&)))))...)))))))))))))	GCUGGGCUACUUACAGAGAGA&UUUUUAAUUAAGUAGCUCAGC	0	0	NA	NA	NA	1	33.3045	4	0.273197	Output/S8h/cleaveLand_result/t_plot/PC-3p-12911_938_XM_021127209.1_396_TPlot.pdf	0	33.3045	-Inf	down	7.8779e-09	1.51467e-08	yes	GO:0008270(zinc ion binding);GO:0043169(cation binding);GO:0043167(ion binding);GO:0046872(metal ion binding);GO:0046914(transition metal ion binding);GO:0005488(binding)	NA
PC-3p-12911_938	XM_021128748.1	753	775	765	-28.7	-20.1	0.700348	11.5	1-8,775-768;11-16,764-759;17-21,757-753	9-10,767-765[AILt];x-x,758-758[BULt]	(((((.((((((...((((((((&))))))))-..))))))-)))))	GCUGGUGCUACUGCUGUUGAGGA&UUUUUAAU-UAAGUAGC-UCAGC	1	26.8255	4	0.9998	Output/S24h/cleaveLand_result/t_plot/PC-3p-12911_938_XM_021128748.1_765_TPlot.pdf	0	0	NA	NA	NA	26.8255	0	Inf	up	2.2264e-07	2.57434e-07	yes	GO:0016684(oxidoreductase activity, acting on peroxide as acceptor);GO:0003824(catalytic activity);GO:1901363(heterocyclic compound binding);GO:0016491(oxidoreductase activity);GO:0042221(response to chemical);GO:0009636(response to toxic substance);GO:1990748(cellular detoxification);GO:0098754(detoxification);GO:0004601(peroxidase activity);GO:0050896(response to stimulus);GO:0046906(tetrapyrro…	ko00053(Ascorbate and aldarate metabolism);ko00480(Glutathione metabolism)
PC-3p-12911_938	XM_021129055.1	1402	1424	1414	-28.7	-18.7	0.651568	8.5	2-9,1423-1416;11-12,1413-1412;13-21,1410-1402	1-1,1424-1424[UP5];10-10,1415-1414[AILt];x-x,1411-1411[BULt]	(((((((((.((..((((((((.&.))))))))-.))-)))))))))	GCUGAGUUAUCUGAAGUUAAAAG&UUUUUAAUU-AAG-UAGCUCAGC	0	0	NA	NA	NA	1	33.3045	4	1	Output/S8h/cleaveLand_result/t_plot/PC-3p-12911_938_XM_021129055.1_1414_TPlot.pdf	0	33.3045	-Inf	down	7.8779e-09	1.51467e-08	yes	GO:0071704(organic substance metabolic process);GO:1901564(organonitrogen compound metabolic process);GO:0044237(cellular metabolic process);GO:0003824(catalytic activity);GO:0019538(protein metabolic process);GO:0009987(cellular process);GO:0044267(cellular protein metabolic process);GO:0042578(phosphoric ester hydrolase activity);GO:0006470(protein dephosphorylation);GO:0006464(cellular protein…	NA
PC-3p-12911_938	XM_021130642.1	1536	1557	1548	-28.7	-21.3	0.74216	9.5	5-18,1553-1540;20-21,1537-1536	1-4,1557-1554[UP5];19-19,1539-1538[AILt]	((..((((((((((((((....&....))))))))))))))-.))	GCCGGAGCUGCUUAAUUAUGAU&UUUUUAAUUAAGUAGCUC-AGC	1	26.8255	4	0.780453	Output/S24h/cleaveLand_result/t_plot/PC-3p-12911_938_XM_021130642.1_1548_TPlot.pdf	0	0	NA	NA	NA	26.8255	0	Inf	up	2.2264e-07	2.57434e-07	yes	GO:0034599(cellular response to oxidative stress);GO:0042592(homeostatic process);GO:0044237(cellular metabolic process);GO:0005622(intracellular);GO:0006979(response to oxidative stress);GO:0015036(disulfide oxidoreductase activity);GO:0006457(protein folding);GO:0016671(oxidoreductase activity, acting on a sulfur group of donors, disulfide as acceptor);GO:0050789(regulation of biological proces…	ko00909(Sesquiterpenoid and triterpenoid biosynthesis)
PC-3p-12911_938	XM_021130643.1	805	826	817	-28.7	-21.3	0.74216	9.5	5-18,822-809;20-21,806-805	1-4,826-823[UP5];19-19,808-807[AILt]	((..((((((((((((((....&....))))))))))))))-.))	GCCGGAGCUGCUUAAUUAUGAU&UUUUUAAUUAAGUAGCUC-AGC	1	26.8255	4	0.769072	Output/S24h/cleaveLand_result/t_plot/PC-3p-12911_938_XM_021130643.1_817_TPlot.pdf	0	0	NA	NA	NA	26.8255	0	Inf	up	2.2264e-07	2.57434e-07	yes	GO:0034599(cellular response to oxidative stress);GO:0042592(homeostatic process);GO:0044237(cellular metabolic process);GO:0005622(intracellular);GO:0006979(response to oxidative stress);GO:0015036(disulfide oxidoreductase activity);GO:0006457(protein folding);GO:0016671(oxidoreductase activity, acting on a sulfur group of donors, disulfide as acceptor);GO:0050789(regulation of biological proces…	ko00909(Sesquiterpenoid and triterpenoid biosynthesis)
PC-3p-12911_938	XM_021131482.1	1531	1551	1542	-28.7	-19.8	0.689895	11	1-5,1551-1547;8-9,1544-1543;12-21,1540-1531	6-7,1546-1545[SIL];10-11,1542-1541[SIL]	((((((((((..((..(((((&)))))..))..))))))))))	GCUGAGCUGCGGGAGAAGAAG&UUUUUAAUUAAGUAGCUCAGC	0	0	NA	NA	NA	1	33.3045	4	0.999847	Output/S8h/cleaveLand_result/t_plot/PC-3p-12911_938_XM_021131482.1_1542_TPlot.pdf	0	33.3045	-Inf	down	7.8779e-09	1.51467e-08	yes	GO:0006725(cellular aromatic compound metabolic process);GO:0006139(nucleobase-containing compound metabolic process);GO:0044446(intracellular organelle part);GO:0043170(macromolecule metabolic process);GO:0008152(metabolic process);GO:0044424(intracellular part);GO:0019012(virion);GO:0090304(nucleic acid metabolic process);GO:0005623(cell);GO:0010467(gene expression);GO:0043229(intracellular org…	ko03040(Spliceosome)
PC-3p-12911_938	XM_021133296.1	3870	3881	3872	-28.7	-19.9	0.69338	4	11-21,3880-3870	10-10,3881-3881[SIL]	(((((((((((.&.)))))))))))	GCUGGGCUGCUG&UUUUUAAUUAAG	1	26.8255	4	0.999954	Output/S24h/cleaveLand_result/t_plot/PC-3p-12911_938_XM_021133296.1_3872_TPlot.pdf	0	0	NA	NA	NA	26.8255	0	Inf	up	2.2264e-07	2.57434e-07	yes	NA	ko02010(ABC transporters);ko00500(Starch and sucrose metabolism);ko01100(Metabolic pathways)
PC-3p-12911_938	XM_021141190.1	2167	2186	2177	-28.7	-18.8	0.655052	5.5	1-11,2186-2176;15-21,2173-2167	12-14,2175-2174[AILq]	(((((((..-(((((((((((&)))))))))))...)))))))	GCUGAGUCA-UUAAUUAAAGA&UUUUUAAUUAAGUAGCUCAGC	0	0	NA	NA	NA	1	33.3045	4	1	Output/S8h/cleaveLand_result/t_plot/PC-3p-12911_938_XM_021141190.1_2177_TPlot.pdf	0	33.3045	-Inf	down	7.8779e-09	1.51467e-08	yes	NA	NA
PC-3p-12911_938	XM_021142288.1	1017	1037	1028	-28.7	-19.5	0.679443	7	3-12,1035-1026;14-17,1025-1022;18-21,1020-1017	1-2,1037-1036[UP5];13-13,x-x[BULq];x-x,1021-1021[BULt]	((((.((((-((((((((((..&..)))))))))).))))-))))	GCUGAAGCU-CUUAAUUGGACA&UUUUUAAUUAAGUAGCU-CAGC	1	26.8255	4	1	Output/S24h/cleaveLand_result/t_plot/PC-3p-12911_938_XM_021142288.1_1028_TPlot.pdf	2	66.6089	2	0.988928	Output/S8h/cleaveLand_result/t_plot/PC-3p-12911_938_XM_021142288.1_1028_TPlot.pdf	26.8255	66.6089	-1.31211	down	3.8576e-05	4.31118e-05	yes	NA	ko04626(Plant-pathogen interaction)
PC-3p-13278_910	BGI_novel_T001257	1040	1061	1051	-37	-25.4	0.686486	10.5	3-9,1059-1053;12-21,1049-1040	1-2,1061-1060[UP5];10-11,1052-1050[AILt]	((((((((((...(((((((..&..)))))))-..))))))))))	GCCAAGAGCAUUGUUGCCAGCG&UUUUGGCAA-GCUGUUCUUGGC	1	26.8255	4	0.999999	Output/S24h/cleaveLand_result/t_plot/PC-3p-13278_910_BGI_novel_T001257_1051_TPlot.pdf	2	66.6089	2	0.98325	Output/S8h/cleaveLand_result/t_plot/PC-3p-13278_910_BGI_novel_T001257_1051_TPlot.pdf	26.8255	66.6089	-1.31211	down	3.8576e-05	4.31118e-05	yes	GO:0035639(purine ribonucleoside triphosphate binding);GO:0032553(ribonucleotide binding);GO:0071704(organic substance metabolic process);GO:0044272(sulfur compound biosynthetic process);GO:0004478(methionine adenosyltransferase activity);GO:0006730(one-carbon metabolic process);GO:0044249(cellular biosynthetic process);GO:0003824(catalytic activity);GO:0046872(metal ion binding);GO:0097367(carbo…	ko00270(Cysteine and methionine metabolism);ko01100(Metabolic pathways);ko01110(Biosynthesis of secondary metabolites);ko01230(Biosynthesis of amino acids)
PC-3p-13278_910	BGI_novel_T001684	427	448	439	-37	-25.1	0.678378	5	1-14,448-435;15-17,433-431;20-21,428-427	x-x,434-434[BULt];18-19,430-429[SIL]	((..(((.((((((((((((((&))))))))))))))-)))..))	GCAUGGAUGCAGCUUGCUAAAA&UUUUGGCAAGCUGU-UCUUGGC	1	26.8255	4	1	Output/S24h/cleaveLand_result/t_plot/PC-3p-13278_910_BGI_novel_T001684_439_TPlot.pdf	0	0	NA	NA	NA	26.8255	0	Inf	up	2.2264e-07	2.57434e-07	yes	GO:0098562(cytoplasmic side of membrane);GO:0009914(hormone transport);GO:0009926(auxin polar transport);GO:0032501(multicellular organismal process);GO:0043231(intracellular membrane-bounded organelle);GO:0098542(defense response to other organism);GO:0051704(multi-organism process);GO:1905360(GTPase complex);GO:0044444(cytoplasmic part);GO:0010817(regulation of hormone levels);GO:0007186(G-prot…	NA
PC-3p-13278_910	BGI_novel_T002061	4879	4897	4888	-37	-24.2	0.654054	6.5	3-11,4895-4887;13-14,4886-4885;16-21,4884-4879	1-2,4897-4896[UP5];12-12,x-x[BULq];15-15,x-x[BULq]	((((((-((-(((((((((..&..))))))))).)).))))))	GCUAAG-AC-GCUUGCCAACC&UUUUGGCAAGCUGUUCUUGGC	1	26.8255	4	1	Output/S24h/cleaveLand_result/t_plot/PC-3p-13278_910_BGI_novel_T002061_4888_TPlot.pdf	3	99.9134	2	0.999975	Output/S8h/cleaveLand_result/t_plot/PC-3p-13278_910_BGI_novel_T002061_4888_TPlot.pdf	26.8255	99.9134	-1.89707	down	8.4486e-11	3.48434e-10	yes	GO:0003824(catalytic activity);GO:0043232(intracellular non-membrane-bounded organelle);GO:0006338(chromatin remodeling);GO:0003676(nucleic acid binding);GO:0070013(intracellular organelle lumen);GO:0016070(RNA metabolic process);GO:0032774(RNA biosynthetic process);GO:0097659(nucleic acid-templated transcription);GO:0043229(intracellular organelle);GO:0018130(heterocycle biosynthetic process);GO…	NA
PC-3p-13278_910	BGI_novel_T003290	1123	1144	1135	-37	-25.2	0.681081	6.5	1-16,1144-1129;18-19,1126-1125	17-17,1128-1127[AILt];20-21,1124-1123[UP3]	..((..((((((((((((((((&))))))))))))))))-.))..	AACAUUGAGCAGCUUGCUAAGA&UUUUGGCAAGCUGUUC-UUGGC	1	26.8255	4	1	Output/S24h/cleaveLand_result/t_plot/PC-3p-13278_910_BGI_novel_T003290_1135_TPlot.pdf	0	0	NA	NA	NA	26.8255	0	Inf	up	2.2264e-07	2.57434e-07	yes	GO:0043167(ion binding);GO:0008033(tRNA processing);GO:0043412(macromolecule modification);GO:0006725(cellular aromatic compound metabolic process);GO:0034470(ncRNA processing);GO:0016746(transferase activity, transferring acyl groups);GO:0003824(catalytic activity);GO:0046872(metal ion binding);GO:0010467(gene expression);GO:0090304(nucleic acid metabolic process);GO:0000408(EKC/KEOPS complex);G…	NA
PC-3p-13278_910	BGI_novel_T003883	1945	1965	1957	-37	-24.8	0.67027	10.5	3-7,1963-1959;10-19,1957-1948;20-21,1946-1945	1-2,1965-1964[UP5];8-9,1958-1958[AILq];x-x,1947-1947[BULt]	((.((((((((((.-(((((..&..)))))..))))))))))-))	GCUCAAGAGCAGUG-GCCGACU&UUUUGGCAAGCUGUUCUUG-GC	1	26.8255	4	1	Output/S24h/cleaveLand_result/t_plot/PC-3p-13278_910_BGI_novel_T003883_1957_TPlot.pdf	0	0	NA	NA	NA	26.8255	0	Inf	up	2.2264e-07	2.57434e-07	yes	GO:0016021(integral component of membrane);GO:0016884(carbon-nitrogen ligase activity, with glutamine as amido-N-donor);GO:0003824(catalytic activity);GO:0016740(transferase activity);GO:0004040(amidase activity);GO:0016020(membrane);GO:0031224(intrinsic component of membrane);GO:0016874(ligase activity);GO:0016879(ligase activity, forming carbon-nitrogen bonds);GO:0016810(hydrolase activity, act…	ko00380(Tryptophan metabolism);ko01100(Metabolic pathways);ko00330(Arginine and proline metabolism);ko00970(Aminoacyl-tRNA biosynthesis);ko00360(Phenylalanine metabolism)
PC-3p-13278_910	BGI_novel_T003884	2207	2227	2219	-37	-24.8	0.67027	10.5	3-7,2225-2221;10-19,2219-2210;20-21,2208-2207	1-2,2227-2226[UP5];8-9,2220-2220[AILq];x-x,2209-2209[BULt]	((.((((((((((.-(((((..&..)))))..))))))))))-))	GCUCAAGAGCAGUG-GCCGACU&UUUUGGCAAGCUGUUCUUG-GC	4	107.302	1	0.360594	Output/S24h/cleaveLand_result/t_plot/PC-3p-13278_910_BGI_novel_T003884_2219_TPlot.pdf	0	0	NA	NA	NA	107.302	0	Inf	up	3.8116e-25	9.90703e-24	yes	GO:0016021(integral component of membrane);GO:0016884(carbon-nitrogen ligase activity, with glutamine as amido-N-donor);GO:0003824(catalytic activity);GO:0016740(transferase activity);GO:0004040(amidase activity);GO:0016020(membrane);GO:0031224(intrinsic component of membrane);GO:0016874(ligase activity);GO:0016879(ligase activity, forming carbon-nitrogen bonds);GO:0016810(hydrolase activity, act…	ko00380(Tryptophan metabolism);ko01100(Metabolic pathways);ko00330(Arginine and proline metabolism);ko00970(Aminoacyl-tRNA biosynthesis);ko00360(Phenylalanine metabolism)
PC-3p-13278_910	BGI_novel_T004150	2760	2786	2777	-37	-24.6	0.664865	11.5	3-14,2784-2773;15-20,2766-2761	1-2,2786-2785[UP5];x-x,2772-2767[BULt];21-21,2760-2760[UP3]	.((((((......((((((((((((..&..))))))))))))------)))))).	CUCAGGAGAAACUGCAGCUUGCCAAUA&UUUUGGCAAGCUGU------UCUUGGC	1	26.8255	4	1	Output/S24h/cleaveLand_result/t_plot/PC-3p-13278_910_BGI_novel_T004150_2777_TPlot.pdf	0	0	NA	NA	NA	26.8255	0	Inf	up	2.2264e-07	2.57434e-07	yes	GO:0044446(intracellular organelle part);GO:0006333(chromatin assembly or disassembly);GO:0006325(chromatin organization);GO:0051252(regulation of RNA metabolic process);GO:0006351(transcription, DNA-templated);GO:0097659(nucleic acid-templated transcription);GO:0032786(positive regulation of DNA-templated transcription, elongation);GO:0032968(positive regulation of transcription elongation from …	NA
PC-3p-13278_910	BGI_novel_T005128	1008	1029	1020	-37	-25.8	0.697297	6	1-12,1029-1018;14-19,1015-1010	13-13,1017-1016[AILt];20-21,1009-1008[UP3]	..((((((..((((((((((((&))))))))))))-.))))))..	AACAAGAAGGAGCUUGCCAAGA&UUUUGGCAAGCU-GUUCUUGGC	0	0	NA	NA	NA	1	33.3045	4	0.999464	Output/S8h/cleaveLand_result/t_plot/PC-3p-13278_910_BGI_novel_T005128_1020_TPlot.pdf	0	33.3045	-Inf	down	7.8779e-09	1.51467e-08	yes	GO:0044422(organelle part);GO:0032991(macromolecular complex);GO:0097159(organic cyclic compound binding);GO:0005488(binding);GO:0005875(microtubule associated complex);GO:0016818(hydrolase activity, acting on acid anhydrides, in phosphorus-containing anhydrides);GO:0036094(small molecule binding);GO:0044464(cell part);GO:0035639(purine ribonucleoside triphosphate binding);GO:0017076(purine nucle…	NA
PC-3p-13278_910	BGI_novel_T005180	227	247	238	-37	-25.3	0.683784	10	5-13,243-235;16-16,232-232;18-21,230-227	1-4,247-244[UP5];14-15,234-233[SIL];17-17,231-231[SIL]	((((.(..(((((((((....&....)))))))))..).))))	GCCACGUCCAGCUUGCCGUCA&UUUUGGCAAGCUGUUCUUGGC	1	26.8255	4	1	Output/S24h/cleaveLand_result/t_plot/PC-3p-13278_910_BGI_novel_T005180_238_TPlot.pdf	0	0	NA	NA	NA	26.8255	0	Inf	up	2.2264e-07	2.57434e-07	yes	NA	ko04141(Protein processing in endoplasmic reticulum);ko03060(Protein export)
PC-3p-13278_910	BGI_novel_T006304	1080	1100	1091	-37	-24.8	0.67027	4	1-13,1100-1088;15-16,1086-1085;18-20,1083-1081	14-14,1087-1087[SIL];17-17,1084-1084[SIL];21-21,1080-1080[UP3]	.(((.((.(((((((((((((&))))))))))))).)).))).	ACCAUGAUCAGCUUGUCAAAA&UUUUGGCAAGCUGUUCUUGGC	1	26.8255	4	1	Output/S24h/cleaveLand_result/t_plot/PC-3p-13278_910_BGI_novel_T006304_1091_TPlot.pdf	0	0	NA	NA	NA	26.8255	0	Inf	up	2.2264e-07	2.57434e-07	yes	GO:0005524(ATP binding);GO:1901363(heterocyclic compound binding);GO:1901564(organonitrogen compound metabolic process);GO:0043170(macromolecule metabolic process);GO:0008152(metabolic process);GO:0003824(catalytic activity);GO:0044237(cellular metabolic process);GO:0032555(purine ribonucleotide binding);GO:0043167(ion binding);GO:0036211(protein modification process);GO:0006468(protein phosphory…	ko03008(Ribosome biogenesis in eukaryotes);ko04712(Circadian rhythm - plant)
PC-3p-13278_910	BGI_novel_T007574	358	376	368	-37	-24.6	0.664865	7.5	1-8,376-369;10-17,368-361;19-21,360-358	9-9,x-x[BULq];18-18,x-x[BULq]	(((-((((((((-((((((((&)))))))).)))))))).)))	GCU-GGAGCAGC-UGCCGGGA&UUUUGGCAAGCUGUUCUUGGC	0	0	NA	NA	NA	1	33.3045	4	1	Output/S8h/cleaveLand_result/t_plot/PC-3p-13278_910_BGI_novel_T007574_368_TPlot.pdf	0	33.3045	-Inf	down	7.8779e-09	1.51467e-08	yes	NA	NA
PC-3p-13278_910	BGI_novel_T008099	244	262	255	-37	-24.4	0.659459	8	1-7,262-256;10-18,255-247;20-21,245-244	8-9,x-x[BULq];19-19,246-246[SIL]	((.(((((((((--(((((((&)))))))..))))))))).))	GCAGAGAGCAGC--GCCGAGA&UUUUGGCAAGCUGUUCUUGGC	1	26.8255	4	1	Output/S24h/cleaveLand_result/t_plot/PC-3p-13278_910_BGI_novel_T008099_255_TPlot.pdf	0	0	NA	NA	NA	26.8255	0	Inf	up	2.2264e-07	2.57434e-07	yes	GO:0006979(response to oxidative stress);GO:0016209(antioxidant activity);GO:0050896(response to stimulus);GO:0044237(cellular metabolic process);GO:0016684(oxidoreductase activity, acting on peroxide as acceptor);GO:0042221(response to chemical);GO:0097159(organic cyclic compound binding);GO:0042744(hydrogen peroxide catabolic process);GO:0098869(cellular oxidant detoxification);GO:0055114(oxida…	ko01100(Metabolic pathways);ko00940(Phenylpropanoid biosynthesis);ko01110(Biosynthesis of secondary metabolites)
PC-3p-13278_910	BGI_novel_T008285	5806	5825	5816	-37	-27.5	0.743243	6.5	3-11,5823-5815;13-17,5813-5809;19-21,5808-5806	1-2,5825-5824[UP5];12-12,5814-5814[SIL];18-18,x-x[BULq]	(((-(((((.(((((((((..&..))))))))).))))).)))	GCC-AGAGCUGCUUGCCAACA&UUUUGGCAAGCUGUUCUUGGC	2	53.6509	2	0.584411	Output/S24h/cleaveLand_result/t_plot/PC-3p-13278_910_BGI_novel_T008285_5816_TPlot.pdf	0	0	NA	NA	NA	53.6509	0	Inf	up	2.3929e-13	1.027e-12	yes	NA	ko03410(Base excision repair)
PC-3p-13278_910	BGI_novel_T010432	1006	1024	1015	-37	-25.4	0.686486	8.5	4-11,1021-1014;13-14,1013-1012;16-21,1011-1006	1-3,1024-1022[UP5];12-12,x-x[BULq];15-15,x-x[BULq]	((((((-((-((((((((...&...)))))))).)).))))))	GCCAGG-AC-GCUUGCCAUGG&UUUUGGCAAGCUGUUCUUGGC	2	53.6509	2	0.991351	Output/S24h/cleaveLand_result/t_plot/PC-3p-13278_910_BGI_novel_T010432_1015_TPlot.pdf	0	0	NA	NA	NA	53.6509	0	Inf	up	2.3929e-13	1.027e-12	yes	GO:0030001(metal ion transport);GO:0015075(ion transmembrane transporter activity);GO:0006810(transport);GO:0046873(metal ion transmembrane transporter activity);GO:0022857(transmembrane transporter activity);GO:0098662(inorganic cation transmembrane transport);GO:0005385(zinc ion transmembrane transporter activity);GO:0055085(transmembrane transport);GO:0044425(membrane part);GO:0031224(intrinsi…	NA
PC-3p-13278_910	BGI_novel_T012286	3551	3571	3562	-37	-24.9	0.672973	5	1-19,3571-3553	20-21,3552-3551[UP3]	..(((((((((((((((((((&)))))))))))))))))))..	AGCAAGGAUAGUUUGUCAAAA&UUUUGGCAAGCUGUUCUUGGC	1	26.8255	4	1	Output/S24h/cleaveLand_result/t_plot/PC-3p-13278_910_BGI_novel_T012286_3562_TPlot.pdf	0	0	NA	NA	NA	26.8255	0	Inf	up	2.2264e-07	2.57434e-07	yes	NA	NA
PC-3p-13278_910	BGI_novel_T012791	1337	1358	1349	-37	-24.5	0.662162	9	4-10,1355-1349;12-14,1347-1345;15-21,1343-1337	1-3,1358-1356[UP5];11-11,1348-1348[SIL];x-x,1344-1344[BULt]	(((((((.(((.(((((((...&...))))))).)))-)))))))	GCCAAGAUACAUCUUGCCGCUA&UUUUGGCAAGCUGU-UCUUGGC	0	0	NA	NA	NA	1	33.3045	4	1	Output/S8h/cleaveLand_result/t_plot/PC-3p-13278_910_BGI_novel_T012791_1349_TPlot.pdf	0	33.3045	-Inf	down	7.8779e-09	1.51467e-08	yes	GO:1901363(heterocyclic compound binding);GO:0043168(anion binding);GO:0004672(protein kinase activity);GO:0030554(adenyl nucleotide binding);GO:1901265(nucleoside phosphate binding);GO:0006796(phosphate-containing compound metabolic process);GO:1901564(organonitrogen compound metabolic process);GO:0032559(adenyl ribonucleotide binding);GO:0007154(cell communication);GO:0009987(cellular process);…	NA
PC-3p-13278_910	BGI_novel_T013693	1519	1542	1531	-37	-27.1	0.732432	11	4-8,1539-1535;9-13,1532-1528;14-21,1526-1519	1-3,1542-1540[UP5];x-x,1534-1533[BULt];x-x,1527-1527[BULt]	((((((((.(((((..(((((...&...)))))--)))))-))))))))	GCCAGGAGUCAGCUAAUGCCACAC&UUUUGGCA--AGCUG-UUCUUGGC	0	0	NA	NA	NA	1	33.3045	4	0.935704	Output/S8h/cleaveLand_result/t_plot/PC-3p-13278_910_BGI_novel_T013693_1531_TPlot.pdf	0	33.3045	-Inf	down	7.8779e-09	1.51467e-08	yes	GO:0031326(regulation of cellular biosynthetic process);GO:0009889(regulation of biosynthetic process);GO:0005634(nucleus);GO:0044212(transcription regulatory region DNA binding);GO:0006357(regulation of transcription from RNA polymerase II promoter);GO:0043227(membrane-bounded organelle);GO:0001134(transcription factor activity, transcription factor recruiting);GO:0000988(transcription factor ac…	NA
PC-3p-13278_910	BGI_novel_T014179	2056	2081	2067	-37	-24.52	0.662703	20.5	5-8,2077-2074;10-21,2067-2056	1-4,2081-2078[UP5];9-9,2073-2068[AILt]	((((((((((((......((((....&....))))-----.))))))))))))	GCCGAGGGCAGCCCCCUCUGCCCCUC&UUUUGGCA-----AGCUGUUCUUGGC	4	107.302	3	0.948056	Output/S24h/cleaveLand_result/t_plot/PC-3p-13278_910_BGI_novel_T014179_2067_TPlot.pdf	2	66.6089	3	0.909665	Output/S8h/cleaveLand_result/t_plot/PC-3p-13278_910_BGI_novel_T014179_2067_TPlot.pdf	107.302	66.6089	0.687888	up	0.0020297	0.0022316	yes	NA	ko01100(Metabolic pathways);ko00190(Oxidative phosphorylation)
PC-3p-13278_910	BGI_novel_T014226	674	693	685	-37	-24.1	0.651351	9.5	1-6,693-688;9-21,686-674	7-8,687-687[AILq]	(((((((((((((.-((((((&))))))..)))))))))))))	GCCAGGGAUGGCUC-CCGGGA&UUUUGGCAAGCUGUUCUUGGC	1	26.8255	4	1	Output/S24h/cleaveLand_result/t_plot/PC-3p-13278_910_BGI_novel_T014226_685_TPlot.pdf	0	0	NA	NA	NA	26.8255	0	Inf	up	2.2264e-07	2.57434e-07	yes	NA	NA
PC-3p-13278_910	XM_016076842.2	992	1014	1004	-37	-25.8	0.697297	6.5	1-6,1014-1009;7-14,1007-1000;16-21,997-992	x-x,1008-1008[BULt];15-15,999-998[AILt]	((((((..((((((((.((((((&))))))-))))))))-.))))))	GCCAGGCCACAGUUUGACCAGAA&UUUUGG-CAAGCUGU-UCUUGGC	0	0	NA	NA	NA	1	33.3045	4	0.999557	Output/S8h/cleaveLand_result/t_plot/PC-3p-13278_910_XM_016076842.2_1004_TPlot.pdf	0	33.3045	-Inf	down	7.8779e-09	1.51467e-08	yes	GO:0071840(cellular component organization or biogenesis);GO:0044464(cell part);GO:0016043(cellular component organization);GO:0097159(organic cyclic compound binding);GO:0009987(cellular process);GO:0043227(membrane-bounded organelle);GO:0005634(nucleus);GO:0043231(intracellular membrane-bounded organelle);GO:0003723(RNA binding);GO:1901363(heterocyclic compound binding);GO:0022613(ribonucleopro…	ko03015(mRNA surveillance pathway)
PC-3p-13278_910	XM_016077350.2	823	842	833	-37	-24.6	0.664865	11.5	5-14,838-829;16-21,828-823	1-4,842-839[UP5];15-15,x-x[BULq]	((((((-((((((((((....&....)))))))))).))))))	GCCAGG-ACGGCUUGUUGCAC&UUUUGGCAAGCUGUUCUUGGC	0	0	NA	NA	NA	2	66.6089	3	0.90238	Output/S8h/cleaveLand_result/t_plot/PC-3p-13278_910_XM_016077350.2_833_TPlot.pdf	0	66.6089	-Inf	down	3.3071e-16	2.22267e-15	yes	GO:0036211(protein modification process);GO:0050896(response to stimulus);GO:0005524(ATP binding);GO:0065007(biological regulation);GO:0009987(cellular process);GO:1901363(heterocyclic compound binding);GO:0050789(regulation of biological process);GO:0043170(macromolecule metabolic process);GO:0006464(cellular protein modification process);GO:0016310(phosphorylation);GO:0043167(ion binding);GO:00…	NA
PC-3p-13278_910	XM_016078091.2	1941	1960	1952	-37	-24.8	0.67027	7	1-8,1960-1953;10-10,1952-1952;12-21,1950-1941	9-9,x-x[BULq];11-11,1951-1951[SIL]	((((((((((.(-((((((((&)))))))).).))))))))))	GCCAGGAGCAAC-UGCUAGAA&UUUUGGCAAGCUGUUCUUGGC	1	26.8255	4	1	Output/S24h/cleaveLand_result/t_plot/PC-3p-13278_910_XM_016078091.2_1952_TPlot.pdf	0	0	NA	NA	NA	26.8255	0	Inf	up	2.2264e-07	2.57434e-07	yes	GO:0006928(movement of cell or subcellular component);GO:0097367(carbohydrate derivative binding);GO:0003777(microtubule motor activity);GO:0000166(nucleotide binding);GO:0016462(pyrophosphatase activity);GO:0016887(ATPase activity);GO:0005515(protein binding);GO:0044430(cytoskeletal part);GO:0005622(intracellular);GO:0044422(organelle part);GO:0008017(microtubule binding);GO:0043226(organelle);G…	NA
PC-3p-13278_910	XM_016078762.2	979	1000	991	-37	-24.1	0.651351	12	5-10,996-991;12-21,988-979	1-4,1000-997[UP5];11-11,990-989[AILt]	((((((((((..((((((....&....))))))-.))))))))))	GCCAAGAACAAAUUUGCCUGUG&UUUUGGCAAG-CUGUUCUUGGC	3	80.4764	2	0.999999	Output/S24h/cleaveLand_result/t_plot/PC-3p-13278_910_XM_016078762.2_991_TPlot.pdf	4	133.218	2	0.999989	Output/S8h/cleaveLand_result/t_plot/PC-3p-13278_910_XM_016078762.2_991_TPlot.pdf	80.4764	133.218	-0.72715	down	0.00030844	0.000341354	yes	GO:1903506(regulation of nucleic acid-templated transcription);GO:0003677(DNA binding);GO:0060255(regulation of macromolecule metabolic process);GO:0050789(regulation of biological process);GO:0010468(regulation of gene expression);GO:0010556(regulation of macromolecule biosynthetic process);GO:0005488(binding);GO:0006355(regulation of transcription, DNA-templated);GO:2000112(regulation of cellul…	ko04075(Plant hormone signal transduction)
PC-3p-13278_910	XM_016080063.2	767	786	778	-37	-25	0.675676	7.5	2-8,785-779;10-13,778-775;15-21,773-767	1-1,786-786[UP5];9-9,x-x[BULq];14-14,774-774[SIL]	(((((((.((((-(((((((.&.))))))).)))).)))))))	GUCAAGACCGGC-UGCCGGAG&UUUUGGCAAGCUGUUCUUGGC	0	0	NA	NA	NA	1	33.3045	4	1	Output/S8h/cleaveLand_result/t_plot/PC-3p-13278_910_XM_016080063.2_778_TPlot.pdf	0	33.3045	-Inf	down	7.8779e-09	1.51467e-08	yes	NA	ko04144(Endocytosis)
PC-3p-13278_910	XM_016082657.2	590	611	601	-37	-24.3	0.656757	10	3-6,609-606;7-7,604-604;9-20,602-591	1-2,611-610[UP5];x-x,605-605[BULt];8-8,603-603[SIL];21-21,590-590[UP3]	.((((((((((((.(.((((..&..))))-).)))))))))))).	UCCGAGAGCAGCUCGACCGACG&UUUUGG-CAAGCUGUUCUUGGC	0	0	NA	NA	NA	3	99.9134	2	0.999966	Output/S8h/cleaveLand_result/t_plot/PC-3p-13278_910_XM_016082657.2_601_TPlot.pdf	0	99.9134	-Inf	down	1.5881e-23	2.78872e-22	yes	GO:0031323(regulation of cellular metabolic process);GO:0031326(regulation of cellular biosynthetic process);GO:0060255(regulation of macromolecule metabolic process);GO:1901363(heterocyclic compound binding);GO:0080090(regulation of primary metabolic process);GO:0097159(organic cyclic compound binding);GO:0010468(regulation of gene expression);GO:0051252(regulation of RNA metabolic process);GO:2…	ko04626(Plant-pathogen interaction);ko04016(MAPK signaling pathway - plant)
PC-3p-13278_910	XM_016085115.2	1030	1052	1043	-37	-24.9	0.672973	7.5	1-4,1052-1049;6-12,1047-1041;14-17,1039-1036;18-21,1033-1030	5-5,1048-1048[SIL];13-13,1040-1040[SIL];x-x,1035-1034[BULt]	((((..((((.(((((((.((((&)))).))))))).))))--))))	GCCAUUGGAAGAGCUUGUGAAGA&UUUUGGCAAGCUGUUCU--UGGC	1	26.8255	4	1	Output/S24h/cleaveLand_result/t_plot/PC-3p-13278_910_XM_016085115.2_1043_TPlot.pdf	1	33.3045	4	1	Output/S8h/cleaveLand_result/t_plot/PC-3p-13278_910_XM_016085115.2_1043_TPlot.pdf	26.8255	33.3045	-0.312112	down	0.40341	0.405116	yes	GO:0016491(oxidoreductase activity);GO:0003824(catalytic activity);GO:0008152(metabolic process);GO:0005488(binding);GO:0046872(metal ion binding);GO:0043169(cation binding);GO:0055114(oxidation-reduction process);GO:0043167(ion binding)	ko00940(Phenylpropanoid biosynthesis);ko01110(Biosynthesis of secondary metabolites)
PC-3p-13278_910	XM_016085194.2	1038	1057	1048	-37	-26.1	0.705405	7.5	3-17,1055-1041;19-21,1040-1038	1-2,1057-1056[UP5];18-18,x-x[BULq]	(((-(((((((((((((((..&..))))))))))))))).)))	GCC-AGAAUGGUUUGCCAGUU&UUUUGGCAAGCUGUUCUUGGC	1	26.8255	4	0.999176	Output/S24h/cleaveLand_result/t_plot/PC-3p-13278_910_XM_016085194.2_1048_TPlot.pdf	0	0	NA	NA	NA	26.8255	0	Inf	up	2.2264e-07	2.57434e-07	yes	GO:0016655(oxidoreductase activity, acting on NAD(P)H, quinone or similar compound as acceptor);GO:0051287(NAD binding);GO:0016491(oxidoreductase activity);GO:0009060(aerobic respiration);GO:0005488(binding);GO:1901363(heterocyclic compound binding);GO:0008152(metabolic process);GO:0003954(NADH dehydrogenase activity);GO:0032553(ribonucleotide binding);GO:0000166(nucleotide binding);GO:0045333(ce…	ko00190(Oxidative phosphorylation);ko01100(Metabolic pathways)
PC-3p-13278_910	XM_016085525.2	188	207	199	-37	-26.2	0.708108	8.5	3-7,205-201;10-21,199-188	1-2,207-206[UP5];8-9,200-200[AILq]	((((((((((((.-(((((..&..)))))..))))))))))))	GCCAGGAACAGCA-GUCAACA&UUUUGGCAAGCUGUUCUUGGC	0	0	NA	NA	NA	3	99.9134	2	0.844241	Output/S8h/cleaveLand_result/t_plot/PC-3p-13278_910_XM_016085525.2_199_TPlot.pdf	0	99.9134	-Inf	down	1.5881e-23	2.78872e-22	yes	GO:0097159(organic cyclic compound binding);GO:0005622(intracellular);GO:0097367(carbohydrate derivative binding);GO:0042026(protein refolding);GO:0006457(protein folding);GO:0000166(nucleotide binding);GO:0036094(small molecule binding);GO:0017076(purine nucleotide binding);GO:0005524(ATP binding);GO:0009987(cellular process);GO:0030554(adenyl nucleotide binding);GO:0044424(intracellular part);G…	ko03018(RNA degradation)
PC-3p-13278_910	XM_016085537.2	416	437	427	-37	-25.6	0.691892	14.5	5-7,433-431;10-21,427-416	1-4,437-434[UP5];8-9,430-428[AILt]	((((((((((((...(((....&....)))-..))))))))))))	GCCAAGGACGGCAUCGCCCAGG&UUUUGGC-AAGCUGUUCUUGGC	2	53.6509	2	0.986465	Output/S24h/cleaveLand_result/t_plot/PC-3p-13278_910_XM_016085537.2_427_TPlot.pdf	0	0	NA	NA	NA	53.6509	0	Inf	up	2.3929e-13	1.027e-12	yes	GO:0044238(primary metabolic process);GO:0071013(catalytic step 2 spliceosome);GO:0044424(intracellular part);GO:1901360(organic cyclic compound metabolic process);GO:0000377(RNA splicing, via transesterification reactions with bulged adenosine as nucleophile);GO:0046483(heterocycle metabolic process);GO:0044428(nuclear part);GO:1990904(ribonucleoprotein complex);GO:0005681(spliceosomal complex);…	ko03040(Spliceosome)
PC-3p-13278_910	XM_016086404.2	330	350	341	-37	-24.8	0.67027	7.5	2-7,349-344;10-12,341-339;14-18,337-333;20-21,331-330	1-1,350-350[UP5];8-9,343-342[SIL];13-13,338-338[SIL];19-19,332-332[SIL]	((.(((((.(((..((((((.&.))))))..))).))))).))	GCGAAGAGGAGCAGGCCAAAG&UUUUGGCAAGCUGUUCUUGGC	1	26.8255	4	1	Output/S24h/cleaveLand_result/t_plot/PC-3p-13278_910_XM_016086404.2_341_TPlot.pdf	0	0	NA	NA	NA	26.8255	0	Inf	up	2.2264e-07	2.57434e-07	yes	NA	ko00620(Pyruvate metabolism);ko01200(Carbon metabolism);ko00710(Carbon fixation in photosynthetic organisms);ko01100(Metabolic pathways)
PC-3p-13278_910	XM_016086451.2	765	788	779	-37	-25.24	0.682162	11	2-7,787-782;10-16,779-773;18-21,768-765	1-1,788-788[UP5];8-9,781-780[SIL];17-17,772-769[AILt]	((((....(((((((..((((((.&.))))))..)))))))---.))))	GCCACCACGAACGGCGGGCCAAGG&UUUUGGCAAGCUGUUC---UUGGC	5	134.127	3	0.790209	Output/S24h/cleaveLand_result/t_plot/PC-3p-13278_910_XM_016086451.2_779_TPlot.pdf	6	199.827	3	0.719019	Output/S8h/cleaveLand_result/t_plot/PC-3p-13278_910_XM_016086451.2_779_TPlot.pdf	134.127	199.827	-0.575147	down	0.00032382	0.00035802	yes	GO:0043226(organelle);GO:0043231(intracellular membrane-bounded organelle);GO:1901700(response to oxygen-containing compound);GO:0003676(nucleic acid binding);GO:0003700(DNA binding transcription factor activity);GO:0010200(response to chitin);GO:0005623(cell);GO:0010033(response to organic substance);GO:0050896(response to stimulus);GO:0001067(regulatory region nucleic acid binding);GO:0043227(m…	ko04144(Endocytosis)
PC-3p-13278_910	XM_016086676.2	208	226	219	-37	-26	0.702703	8.5	2-7,225-220;10-21,219-208	1-1,226-226[UP5];8-9,x-x[BULq]	((((((((((((--((((((.&.))))))..))))))))))))	GCCAAGGACAGC--GUCAGGC&UUUUGGCAAGCUGUUCUUGGC	3	80.4764	2	0.931905	Output/S24h/cleaveLand_result/t_plot/PC-3p-13278_910_XM_016086676.2_219_TPlot.pdf	1	33.3045	4	0.998511	Output/S8h/cleaveLand_result/t_plot/PC-3p-13278_910_XM_016086676.2_219_TPlot.pdf	80.4764	33.3045	1.27285	up	9.7594e-06	1.11208e-05	yes	GO:0006605(protein targeting);GO:0015197(peptide transporter activity);GO:0071705(nitrogen compound transport);GO:0046907(intracellular transport);GO:0071702(organic substance transport);GO:0022857(transmembrane transporter activity);GO:0005215(transporter activity);GO:0006886(intracellular protein transport);GO:0045184(establishment of protein localization);GO:0051649(establishment of localizati…	ko04141(Protein processing in endoplasmic reticulum);ko03060(Protein export);ko04145(Phagosome)
PC-3p-13278_910	XM_016086677.2	208	226	219	-37	-26	0.702703	8.5	2-7,225-220;10-21,219-208	1-1,226-226[UP5];8-9,x-x[BULq]	((((((((((((--((((((.&.))))))..))))))))))))	GCCAAGGACAGC--GUCAGGC&UUUUGGCAAGCUGUUCUUGGC	0	0	NA	NA	NA	1	33.3045	4	0.998871	Output/S8h/cleaveLand_result/t_plot/PC-3p-13278_910_XM_016086677.2_219_TPlot.pdf	0	33.3045	-Inf	down	7.8779e-09	1.51467e-08	yes	GO:0006605(protein targeting);GO:0015197(peptide transporter activity);GO:0071705(nitrogen compound transport);GO:0046907(intracellular transport);GO:0071702(organic substance transport);GO:0022857(transmembrane transporter activity);GO:0005215(transporter activity);GO:0006886(intracellular protein transport);GO:0045184(establishment of protein localization);GO:0051649(establishment of localizati…	ko04141(Protein processing in endoplasmic reticulum);ko03060(Protein export);ko04145(Phagosome)
PC-3p-13278_910	XM_016088238.2	618	649	629	-37	-24.4	0.659459	24.5	2-6,648-644;7-8,640-639;9-21,630-618	1-1,649-649[UP5];x-x,643-641[BULt];x-x,638-631[BULt]	(((((((((((((........((...(((((.&.)))))---))--------)))))))))))))	GCCAAGAGCAGCUAUACAUUAUGUAACCAGAG&UUUUGG---CA--------AGCUGUUCUUGGC	4	107.302	2	0.999993	Output/S24h/cleaveLand_result/t_plot/PC-3p-13278_910_XM_016088238.2_629_TPlot.pdf	0	0	NA	NA	NA	107.302	0	Inf	up	3.8116e-25	9.90703e-24	yes	NA	ko04141(Protein processing in endoplasmic reticulum);ko00510(N-Glycan biosynthesis);ko01100(Metabolic pathways)
PC-3p-13278_910	XM_016089263.2	1655	1679	1667	-37	-24.9	0.672973	16	5-8,1675-1672;9-12,1668-1665;13-21,1663-1655	1-4,1679-1676[UP5];x-x,1671-1669[BULt];x-x,1664-1664[BULt]	(((((((((.((((...((((....&....))))---))))-)))))))))	GCCAAGGGCAAGCUAAGUGCCUGUG&UUUUGGCA---AGCU-GUUCUUGGC	6	160.953	2	0.999078	Output/S24h/cleaveLand_result/t_plot/PC-3p-13278_910_XM_016089263.2_1667_TPlot.pdf	0	0	NA	NA	NA	160.953	0	Inf	up	6.9605e-37	4.29381e-35	yes	GO:0031224(intrinsic component of membrane);GO:0044425(membrane part);GO:0016020(membrane);GO:0016021(integral component of membrane);GO:0005488(binding);GO:0008289(lipid binding)	NA
PC-3p-13278_910	XM_016089500.2	632	653	644	-37	-24.9	0.672973	11	5-10,649-644;11-19,642-634	1-4,653-650[UP5];x-x,643-643[BULt];20-21,633-632[UP3]	..(((((((((.((((((....&....))))))-)))))))))..	CACAAGAACAGACUUGCCUCCU&UUUUGGCAAG-CUGUUCUUGGC	3	80.4764	3	0.883416	Output/S24h/cleaveLand_result/t_plot/PC-3p-13278_910_XM_016089500.2_644_TPlot.pdf	1	33.3045	4	1	Output/S8h/cleaveLand_result/t_plot/PC-3p-13278_910_XM_016089500.2_644_TPlot.pdf	80.4764	33.3045	1.27285	up	9.7594e-06	1.11208e-05	yes	GO:0098869(cellular oxidant detoxification);GO:0043167(ion binding);GO:0044237(cellular metabolic process);GO:0044248(cellular catabolic process);GO:0072593(reactive oxygen species metabolic process);GO:0009987(cellular process);GO:0050896(response to stimulus);GO:0006950(response to stress);GO:0042744(hydrogen peroxide catabolic process);GO:0005488(binding);GO:0042743(hydrogen peroxide metabolic…	ko00940(Phenylpropanoid biosynthesis);ko01110(Biosynthesis of secondary metabolites);ko01100(Metabolic pathways)
PC-3p-13278_910	XM_016089533.2	1040	1061	1051	-37	-25.4	0.686486	10.5	3-9,1059-1053;12-21,1049-1040	1-2,1061-1060[UP5];10-11,1052-1050[AILt]	((((((((((...(((((((..&..)))))))-..))))))))))	GCCAAGAGCAUUGUUGCCAGCG&UUUUGGCAA-GCUGUUCUUGGC	0	0	NA	NA	NA	1	33.3045	4	0.999992	Output/S8h/cleaveLand_result/t_plot/PC-3p-13278_910_XM_016089533.2_1051_TPlot.pdf	0	33.3045	-Inf	down	7.8779e-09	1.51467e-08	yes	GO:0035639(purine ribonucleoside triphosphate binding);GO:0032553(ribonucleotide binding);GO:0071704(organic substance metabolic process);GO:0044272(sulfur compound biosynthetic process);GO:0004478(methionine adenosyltransferase activity);GO:0006730(one-carbon metabolic process);GO:0044249(cellular biosynthetic process);GO:0003824(catalytic activity);GO:0046872(metal ion binding);GO:0097367(carbo…	ko00270(Cysteine and methionine metabolism);ko01100(Metabolic pathways);ko01110(Biosynthesis of secondary metabolites);ko01230(Biosynthesis of amino acids)
PC-3p-13278_910	XM_016089706.2	1122	1141	1132	-37	-25.1	0.678378	8	2-4,1140-1138;6-17,1136-1125;19-21,1124-1122	1-1,1141-1141[UP5];5-5,1137-1137[SIL];18-18,x-x[BULq]	(((-((((((((((((.(((.&.))).)))))))))))).)))	GCC-AGAACAGUUUGUGGAGC&UUUUGGCAAGCUGUUCUUGGC	0	0	NA	NA	NA	1	33.3045	4	1	Output/S8h/cleaveLand_result/t_plot/PC-3p-13278_910_XM_016089706.2_1132_TPlot.pdf	0	33.3045	-Inf	down	7.8779e-09	1.51467e-08	yes	GO:0016788(hydrolase activity, acting on ester bonds);GO:0006796(phosphate-containing compound metabolic process);GO:0003824(catalytic activity);GO:0044237(cellular metabolic process);GO:0008252(nucleotidase activity);GO:0016791(phosphatase activity);GO:0006793(phosphorus metabolic process);GO:0016787(hydrolase activity);GO:0042578(phosphoric ester hydrolase activity);GO:0008253(5'-nucleotidase a…	ko01110(Biosynthesis of secondary metabolites);ko00230(Purine metabolism);ko00760(Nicotinate and nicotinamide metabolism);ko01100(Metabolic pathways);ko00240(Pyrimidine metabolism)
PC-3p-13278_910	XM_016091402.2	2147	2169	2159	-37	-25.1	0.678378	9	2-7,2168-2163;8-14,2161-2155;16-21,2152-2147	1-1,2169-2169[UP5];x-x,2162-2162[BULt];15-15,2154-2153[AILt]	((((((..(((((((.((((((.&.))))))-)))))))-.))))))	GCCAGGUUGCAGCUUGGUCGAGU&UUUUGGC-AAGCUGU-UCUUGGC	0	0	NA	NA	NA	1	33.3045	4	1	Output/S8h/cleaveLand_result/t_plot/PC-3p-13278_910_XM_016091402.2_2159_TPlot.pdf	0	33.3045	-Inf	down	7.8779e-09	1.51467e-08	yes	GO:0043169(cation binding);GO:0043167(ion binding);GO:0008270(zinc ion binding);GO:0046872(metal ion binding);GO:0005488(binding);GO:0046914(transition metal ion binding)	NA
PC-3p-13278_910	XM_016091541.2	140	163	151	-37	-24.7	0.667568	11	2-8,162-156;9-12,152-149;14-20,147-141	1-1,163-163[UP5];x-x,155-153[BULt];13-13,148-148[SIL];21-21,140-140[UP3]	.(((((((.((((...(((((((.&.)))))))---)))).))))))).	CCCAAGAAGAGCUUCUUGCCGAGC&UUUUGGCA---AGCUGUUCUUGGC	4	107.302	3	0.927281	Output/S24h/cleaveLand_result/t_plot/PC-3p-13278_910_XM_016091541.2_151_TPlot.pdf	0	0	NA	NA	NA	107.302	0	Inf	up	3.8116e-25	9.90703e-24	yes	NA	NA
PC-3p-13278_910	XM_016091988.2	640	659	651	-37	-24.1	0.651351	9.5	1-6,659-654;9-21,652-640	7-8,653-653[AILq]	(((((((((((((.-((((((&))))))..)))))))))))))	GCCAGGGAUGGCUC-CCGGGA&UUUUGGCAAGCUGUUCUUGGC	1	26.8255	4	1	Output/S24h/cleaveLand_result/t_plot/PC-3p-13278_910_XM_016091988.2_651_TPlot.pdf	0	0	NA	NA	NA	26.8255	0	Inf	up	2.2264e-07	2.57434e-07	yes	NA	NA
PC-3p-13278_910	XM_016092496.1	549	571	560	-37	-25.9	0.7	9.5	3-8,569-564;9-14,561-556;16-21,554-549	1-2,571-570[UP5];x-x,563-562[BULt];15-15,555-555[SIL]	((((((.((((((..((((((..&..))))))--)))))).))))))	GCCAAGUGCAGUUAAUGCCAAUG&UUUUGGCA--AGCUGUUCUUGGC	1	26.8255	4	0.999814	Output/S24h/cleaveLand_result/t_plot/PC-3p-13278_910_XM_016092496.1_560_TPlot.pdf	0	0	NA	NA	NA	26.8255	0	Inf	up	2.2264e-07	2.57434e-07	yes	GO:0043650(dicarboxylic acid biosynthetic process);GO:0043648(dicarboxylic acid metabolic process);GO:0044283(small molecule biosynthetic process);GO:0009089(lysine biosynthetic process via diaminopimelate);GO:0005737(cytoplasm);GO:0006807(nitrogen compound metabolic process);GO:0008152(metabolic process);GO:0009987(cellular process);GO:0046394(carboxylic acid biosynthetic process);GO:0005622(int…	ko01230(Biosynthesis of amino acids);ko00261(Monobactam biosynthesis);ko01110(Biosynthesis of secondary metabolites);ko00300(Lysine biosynthesis);ko01100(Metabolic pathways)
PC-3p-13278_910	XM_016094590.2	5090	5118	5101	-37	-24.8	0.67027	18.5	1-9,5118-5110;10-19,5101-5092	x-x,5109-5102[BULt];20-21,5091-5090[UP3]	..((((((((((........(((((((((&)))))))))--------))))))))))..	AACAAGAGCAGCAGCAAGUAUUGCCAAAA&UUUUGGCAA--------GCUGUUCUUGGC	0	0	NA	NA	NA	2	66.6089	3	0.858178	Output/S8h/cleaveLand_result/t_plot/PC-3p-13278_910_XM_016094590.2_5101_TPlot.pdf	0	66.6089	-Inf	down	3.3071e-16	2.22267e-15	yes	GO:0070887(cellular response to chemical stimulus);GO:0071365(cellular response to auxin stimulus);GO:1901363(heterocyclic compound binding);GO:0005634(nucleus);GO:0051716(cellular response to stimulus);GO:0060255(regulation of macromolecule metabolic process);GO:0031326(regulation of cellular biosynthetic process);GO:0042221(response to chemical);GO:0051252(regulation of RNA metabolic process);G…	ko04075(Plant hormone signal transduction)
PC-3p-13278_910	XM_016095043.2	64	87	75	-37	-24.82	0.670811	18.5	5-7,83-81;10-21,75-64	1-4,87-84[UP5];8-9,80-76[AILt]	((((((((((((.....(((....&....)))---..))))))))))))	GCCAAGGACAGCGUAAGGCUCGUC&UUUUGGC---AAGCUGUUCUUGGC	0	0	NA	NA	NA	3	99.9134	2	0.998419	Output/S8h/cleaveLand_result/t_plot/PC-3p-13278_910_XM_016095043.2_75_TPlot.pdf	0	99.9134	-Inf	down	1.5881e-23	2.78872e-22	yes	GO:1904680(peptide transmembrane transporter activity);GO:0070727(cellular macromolecule localization);GO:0005623(cell);GO:0071702(organic substance transport);GO:0022884(macromolecule transmembrane transporter activity);GO:0034613(cellular protein localization);GO:0071705(nitrogen compound transport);GO:0005215(transporter activity);GO:0015399(primary active transmembrane transporter activity);G…	ko04145(Phagosome);ko03060(Protein export);ko04141(Protein processing in endoplasmic reticulum)
PC-3p-13278_910	XM_016095044.2	64	87	75	-37	-24.82	0.670811	18.5	5-7,83-81;10-21,75-64	1-4,87-84[UP5];8-9,80-76[AILt]	((((((((((((.....(((....&....)))---..))))))))))))	GCCAAGGACAGCGUAAGGCUCGUC&UUUUGGC---AAGCUGUUCUUGGC	1	26.8255	4	1	Output/S24h/cleaveLand_result/t_plot/PC-3p-13278_910_XM_016095044.2_75_TPlot.pdf	1	33.3045	4	1	Output/S8h/cleaveLand_result/t_plot/PC-3p-13278_910_XM_016095044.2_75_TPlot.pdf	26.8255	33.3045	-0.312112	down	0.40341	0.405116	yes	GO:1904680(peptide transmembrane transporter activity);GO:0070727(cellular macromolecule localization);GO:0005623(cell);GO:0071702(organic substance transport);GO:0022884(macromolecule transmembrane transporter activity);GO:0034613(cellular protein localization);GO:0071705(nitrogen compound transport);GO:0005215(transporter activity);GO:0015399(primary active transmembrane transporter activity);G…	ko04145(Phagosome);ko03060(Protein export);ko04141(Protein processing in endoplasmic reticulum)
PC-3p-13278_910	XM_016095558.2	1381	1402	1394	-37	-25.3	0.683784	8	1-7,1402-1396;10-18,1394-1386;19-21,1383-1381	8-9,1395-1395[AILq];x-x,1385-1384[BULt]	(((..(((((((((.-(((((((&)))))))..)))))))))--)))	GCCUCAAGAACAGUG-GCCAGAA&UUUUGGCAAGCUGUUCUU--GGC	1	26.8255	4	1	Output/S24h/cleaveLand_result/t_plot/PC-3p-13278_910_XM_016095558.2_1394_TPlot.pdf	2	66.6089	2	0.984869	Output/S8h/cleaveLand_result/t_plot/PC-3p-13278_910_XM_016095558.2_1394_TPlot.pdf	26.8255	66.6089	-1.31211	down	3.8576e-05	4.31118e-05	yes	GO:0016787(hydrolase activity);GO:0003824(catalytic activity);GO:0008152(metabolic process)	ko04075(Plant hormone signal transduction)
PC-3p-13278_910	XM_016096284.2	2762	2783	2774	-37	-25.7	0.694595	10	5-14,2779-2770;17-21,2766-2762	1-4,2783-2780[UP5];15-16,2769-2767[AILt]	(((((...((((((((((....&....))))))))))-..)))))	GCCAAAUUACAGCUUGCCUCCC&UUUUGGCAAGCUGU-UCUUGGC	2	53.6509	2	0.977278	Output/S24h/cleaveLand_result/t_plot/PC-3p-13278_910_XM_016096284.2_2774_TPlot.pdf	1	33.3045	4	0.999896	Output/S8h/cleaveLand_result/t_plot/PC-3p-13278_910_XM_016096284.2_2774_TPlot.pdf	53.6509	33.3045	0.687888	up	0.029111	0.0312173	yes	GO:0004553(hydrolase activity, hydrolyzing O-glycosyl compounds);GO:0005488(binding);GO:0043170(macromolecule metabolic process);GO:0004559(alpha-mannosidase activity);GO:0006013(mannose metabolic process);GO:0019318(hexose metabolic process);GO:0044267(cellular protein metabolic process);GO:1901135(carbohydrate derivative metabolic process);GO:0015923(mannosidase activity);GO:0019538(protein met…	ko00511(Other glycan degradation)
PC-3p-13278_910	XM_016096582.2	1606	1630	1617	-37	-24.16	0.652973	16	2-7,1629-1624;10-12,1617-1615;14-21,1613-1606	1-1,1630-1630[UP5];8-9,1623-1618[AILt];13-13,1614-1614[SIL]	((((((((.(((......((((((.&.))))))----..))).))))))))	GCCAAGAAGAGUGAUACGGCCAAGU&UUUUGGC----AAGCUGUUCUUGGC	0	0	NA	NA	NA	1	33.3045	4	1	Output/S8h/cleaveLand_result/t_plot/PC-3p-13278_910_XM_016096582.2_1617_TPlot.pdf	0	33.3045	-Inf	down	7.8779e-09	1.51467e-08	yes	GO:0036094(small molecule binding);GO:0070279(vitamin B6 binding);GO:1901566(organonitrogen compound biosynthetic process);GO:0006782(protoporphyrinogen IX biosynthetic process);GO:1901360(organic cyclic compound metabolic process);GO:0016869(intramolecular transferase activity, transferring amino groups);GO:0008152(metabolic process);GO:0006725(cellular aromatic compound metabolic process);GO:00…	ko00860(Porphyrin and chlorophyll metabolism);ko01110(Biosynthesis of secondary metabolites);ko01100(Metabolic pathways)
PC-3p-13278_910	XM_016096739.2	1017	1040	1029	-37	-25.7	0.694595	10	2-8,1039-1033;9-17,1030-1022;18-21,1020-1017	1-1,1040-1040[UP5];x-x,1032-1031[BULt];x-x,1021-1021[BULt]	((((.(((((((((..(((((((.&.)))))))--)))))))))-))))	GCCAGGGAGCAGUUAGUGCCAGGU&UUUUGGCA--AGCUGUUCU-UGGC	1	26.8255	4	0.999987	Output/S24h/cleaveLand_result/t_plot/PC-3p-13278_910_XM_016096739.2_1029_TPlot.pdf	0	0	NA	NA	NA	26.8255	0	Inf	up	2.2264e-07	2.57434e-07	yes	GO:0016020(membrane);GO:0005622(intracellular);GO:0006810(transport);GO:0046907(intracellular transport);GO:0015399(primary active transmembrane transporter activity);GO:0008320(protein transmembrane transporter activity);GO:0034613(cellular protein localization);GO:0015031(protein transport);GO:0015405(P-P-bond-hydrolysis-driven transmembrane transporter activity);GO:0006886(intracellular protei…	NA
PC-3p-13278_910	XM_016097654.2	631	652	643	-37	-24.6	0.664865	9	4-9,649-644;11-13,642-640;14-21,638-631	1-3,652-650[UP5];10-10,643-643[SIL];x-x,639-639[BULt]	((((((((.(((.((((((...&...)))))).)))-))))))))	GCCAAGGGCCAGAUUGCCAUCG&UUUUGGCAAGCUG-UUCUUGGC	2	53.6509	2	0.99995	Output/S24h/cleaveLand_result/t_plot/PC-3p-13278_910_XM_016097654.2_643_TPlot.pdf	0	0	NA	NA	NA	53.6509	0	Inf	up	2.3929e-13	1.027e-12	yes	NA	NA
PC-3p-13278_910	XM_016097798.2	549	567	558	-37	-24.6	0.664865	5	1-14,567-554;18-21,552-549	15-17,553-553[AILq]	((((.--((((((((((((((&))))))))))))))...))))	GCCAC--ACAGCUUGUCGAAA&UUUUGGCAAGCUGUUCUUGGC	0	0	NA	NA	NA	1	33.3045	4	1	Output/S8h/cleaveLand_result/t_plot/PC-3p-13278_910_XM_016097798.2_558_TPlot.pdf	0	33.3045	-Inf	down	7.8779e-09	1.51467e-08	yes	GO:0005829(cytosol);GO:0016877(ligase activity, forming carbon-sulfur bonds);GO:0005622(intracellular);GO:1901564(organonitrogen compound metabolic process);GO:0044238(primary metabolic process);GO:0008641(ubiquitin-like modifier activating enzyme activity);GO:0044424(intracellular part);GO:0019781(NEDD8 activating enzyme activity);GO:0044260(cellular macromolecule metabolic process);GO:0005634(n…	NA
PC-3p-13278_910	XM_016097800.2	548	566	557	-37	-24.6	0.664865	5	1-14,566-553;18-21,551-548	15-17,552-552[AILq]	((((.--((((((((((((((&))))))))))))))...))))	GCCAC--ACAGCUUGUCGAAA&UUUUGGCAAGCUGUUCUUGGC	0	0	NA	NA	NA	1	33.3045	4	1	Output/S8h/cleaveLand_result/t_plot/PC-3p-13278_910_XM_016097800.2_557_TPlot.pdf	0	33.3045	-Inf	down	7.8779e-09	1.51467e-08	yes	GO:0005829(cytosol);GO:0016877(ligase activity, forming carbon-sulfur bonds);GO:0005622(intracellular);GO:1901564(organonitrogen compound metabolic process);GO:0044238(primary metabolic process);GO:0008641(ubiquitin-like modifier activating enzyme activity);GO:0044424(intracellular part);GO:0019781(NEDD8 activating enzyme activity);GO:0044260(cellular macromolecule metabolic process);GO:0005634(n…	NA
PC-3p-13278_910	XM_016100104.2	1728	1752	1742	-37	-24.2	0.654054	10.5	2-8,1751-1745;10-14,1742-1738;15-21,1734-1728	1-1,1752-1752[UP5];9-9,1744-1743[AILt];x-x,1737-1735[BULt]	(((((((...(((((..(((((((.&.)))))))-.)))))---)))))))	GCUAGGGAGCACAGCGAUGCCAAGG&UUUUGGCA-AGCUGU---UCUUGGC	1	26.8255	4	1	Output/S24h/cleaveLand_result/t_plot/PC-3p-13278_910_XM_016100104.2_1742_TPlot.pdf	0	0	NA	NA	NA	26.8255	0	Inf	up	2.2264e-07	2.57434e-07	yes	NA	NA
PC-3p-13278_910	XM_016100763.2	628	646	639	-37	-25.6	0.691892	8.5	2-6,645-641;9-21,640-628	1-1,646-646[UP5];7-8,x-x[BULq]	(((((((((((((--(((((.&.)))))..)))))))))))))	GCCGGGGACGGCU--CCAGAC&UUUUGGCAAGCUGUUCUUGGC	1	26.8255	4	0.999995	Output/S24h/cleaveLand_result/t_plot/PC-3p-13278_910_XM_016100763.2_639_TPlot.pdf	0	0	NA	NA	NA	26.8255	0	Inf	up	2.2264e-07	2.57434e-07	yes	GO:1903506(regulation of nucleic acid-templated transcription);GO:0009889(regulation of biosynthetic process);GO:1901265(nucleoside phosphate binding);GO:0009890(negative regulation of biosynthetic process);GO:0031326(regulation of cellular biosynthetic process);GO:0019222(regulation of metabolic process);GO:0043168(anion binding);GO:0045934(negative regulation of nucleobase-containing compound m…	ko00130(Ubiquinone and other terpenoid-quinone biosynthesis);ko01110(Biosynthesis of secondary metabolites)
PC-3p-13278_910	XM_016100820.2	668	688	679	-37	-26.5	0.716216	10	5-12,684-677;14-20,675-669	1-4,688-685[UP5];13-13,676-676[SIL];21-21,668-668[UP3]	.(((((((.((((((((....&....)))))))).))))))).	CCCAGGAGGAGCUUGCCCCAA&UUUUGGCAAGCUGUUCUUGGC	1	26.8255	4	0.995518	Output/S24h/cleaveLand_result/t_plot/PC-3p-13278_910_XM_016100820.2_679_TPlot.pdf	0	0	NA	NA	NA	26.8255	0	Inf	up	2.2264e-07	2.57434e-07	yes	NA	NA
PC-3p-13278_910	XM_016100929.2	1253	1273	1264	-37	-25.8	0.697297	12	6-21,1268-1253	1-5,1273-1269[UP5]	((((((((((((((((.....&.....))))))))))))))))	GCUGAGGGCAGCUUGUAAUGC&UUUUGGCAAGCUGUUCUUGGC	0	0	NA	NA	NA	1	33.3045	4	0.999602	Output/S8h/cleaveLand_result/t_plot/PC-3p-13278_910_XM_016100929.2_1264_TPlot.pdf	0	33.3045	-Inf	down	7.8779e-09	1.51467e-08	yes	GO:0001883(purine nucleoside binding);GO:0036094(small molecule binding);GO:0032553(ribonucleotide binding);GO:0017111(nucleoside-triphosphatase activity);GO:0003824(catalytic activity);GO:0005525(GTP binding);GO:0032549(ribonucleoside binding);GO:0097159(organic cyclic compound binding);GO:0016818(hydrolase activity, acting on acid anhydrides, in phosphorus-containing anhydrides);GO:0032550(puri…	NA
PC-3p-13278_910	XM_016102072.2	2196	2218	2209	-37	-24.1	0.651351	10	1-12,2218-2207;13-20,2204-2197	x-x,2206-2205[BULt];21-21,2196-2196[UP3]	.((((((((..((((((((((((&))))))))))))--)))))))).	ACUGAGAACCAGGUUUGCCAGGA&UUUUGGCAAGCU--GUUCUUGGC	0	0	NA	NA	NA	1	33.3045	4	1	Output/S8h/cleaveLand_result/t_plot/PC-3p-13278_910_XM_016102072.2_2209_TPlot.pdf	0	33.3045	-Inf	down	7.8779e-09	1.51467e-08	yes	NA	NA
PC-3p-13278_910	XM_016102397.2	1327	1347	1338	-37	-25.4	0.686486	7	2-5,1346-1343;7-16,1341-1332;18-21,1330-1327	1-1,1347-1347[UP5];6-6,1342-1342[SIL];17-17,1331-1331[SIL]	((((.((((((((((.((((.&.)))).)))))))))).))))	GUCGCGAACAGCUUGGCGGAU&UUUUGGCAAGCUGUUCUUGGC	2	53.6509	3	0.754258	Output/S24h/cleaveLand_result/t_plot/PC-3p-13278_910_XM_016102397.2_1338_TPlot.pdf	0	0	NA	NA	NA	53.6509	0	Inf	up	2.3929e-13	1.027e-12	yes	GO:2000112(regulation of cellular macromolecule biosynthetic process);GO:1903506(regulation of nucleic acid-templated transcription);GO:0009867(jasmonic acid mediated signaling pathway);GO:0031323(regulation of cellular metabolic process);GO:0097305(response to alcohol);GO:2000241(regulation of reproductive process);GO:0065007(biological regulation);GO:0009968(negative regulation of signal transd…	ko04075(Plant hormone signal transduction)
PC-3p-13278_910	XM_016103066.2	4348	4369	4361	-37	-25.2	0.681081	7	2-8,4368-4362;10-14,4361-4357;15-21,4354-4348	1-1,4369-4369[UP5];9-9,x-x[BULq];x-x,4356-4355[BULt]	(((((((..(((((-(((((((.&.))))))).)))))--)))))))	GCUAAGGUUACAGC-UGCCAGAC&UUUUGGCAAGCUGU--UCUUGGC	1	26.8255	4	1	Output/S24h/cleaveLand_result/t_plot/PC-3p-13278_910_XM_016103066.2_4361_TPlot.pdf	0	0	NA	NA	NA	26.8255	0	Inf	up	2.2264e-07	2.57434e-07	yes	GO:1901564(organonitrogen compound metabolic process);GO:0044260(cellular macromolecule metabolic process);GO:0043170(macromolecule metabolic process);GO:0044238(primary metabolic process);GO:0003824(catalytic activity);GO:0071840(cellular component organization or biogenesis);GO:0019538(protein metabolic process);GO:0006355(regulation of transcription, DNA-templated);GO:0043231(intracellular mem…	NA
PC-3p-13278_910	XM_016103249.2	2091	2110	2101	-37	-27.6	0.745946	7	4-14,2107-2097;16-20,2096-2092	1-3,2110-2108[UP5];15-15,x-x[BULq];21-21,2091-2091[UP3]	.(((((-(((((((((((...&...))))))))))).))))).	CCCAAG-ACAGCUUGCCAUCA&UUUUGGCAAGCUGUUCUUGGC	0	0	NA	NA	NA	1	33.3045	4	0.858739	Output/S8h/cleaveLand_result/t_plot/PC-3p-13278_910_XM_016103249.2_2101_TPlot.pdf	0	33.3045	-Inf	down	7.8779e-09	1.51467e-08	yes	GO:0097159(organic cyclic compound binding);GO:0044464(cell part);GO:0003677(DNA binding);GO:0043227(membrane-bounded organelle);GO:0016020(membrane);GO:0005622(intracellular);GO:0043226(organelle);GO:1901363(heterocyclic compound binding);GO:0005623(cell);GO:0043231(intracellular membrane-bounded organelle);GO:0043229(intracellular organelle);GO:0003676(nucleic acid binding);GO:0005634(nucleus);…	ko04075(Plant hormone signal transduction)
PC-3p-13278_910	XM_016103323.2	1113	1134	1125	-37	-24.8	0.67027	5.5	2-6,1133-1129;8-19,1127-1116;20-21,1114-1113	1-1,1134-1134[UP5];7-7,1128-1128[SIL];x-x,1115-1115[BULt]	((.((((((((((((.(((((.&.))))).))))))))))))-))	GCACAAGAGCAGCUUAUCAAAU&UUUUGGCAAGCUGUUCUUG-GC	2	53.6509	2	0.999865	Output/S24h/cleaveLand_result/t_plot/PC-3p-13278_910_XM_016103323.2_1125_TPlot.pdf	0	0	NA	NA	NA	53.6509	0	Inf	up	2.3929e-13	1.027e-12	yes	GO:1903506(regulation of nucleic acid-templated transcription);GO:0097159(organic cyclic compound binding);GO:0050794(regulation of cellular process);GO:0031326(regulation of cellular biosynthetic process);GO:2000112(regulation of cellular macromolecule biosynthetic process);GO:0006355(regulation of transcription, DNA-templated);GO:0080090(regulation of primary metabolic process);GO:0060255(regul…	ko04141(Protein processing in endoplasmic reticulum);ko04016(MAPK signaling pathway - plant)
PC-3p-13278_910	XM_016103363.2	2655	2674	2666	-37	-25.6	0.691892	9.5	3-7,2672-2668;10-21,2666-2655	1-2,2674-2673[UP5];8-9,2667-2667[AILq]	((((((((((((.-(((((..&..)))))..))))))))))))	GCCAAGAAUGGUG-GCCAAUU&UUUUGGCAAGCUGUUCUUGGC	0	0	NA	NA	NA	1	33.3045	4	0.999945	Output/S8h/cleaveLand_result/t_plot/PC-3p-13278_910_XM_016103363.2_2666_TPlot.pdf	0	33.3045	-Inf	down	7.8779e-09	1.51467e-08	yes	GO:0036094(small molecule binding);GO:0005488(binding);GO:1901265(nucleoside phosphate binding);GO:0003723(RNA binding);GO:0000166(nucleotide binding);GO:0097159(organic cyclic compound binding);GO:0003676(nucleic acid binding);GO:1901363(heterocyclic compound binding)	NA
PC-3p-13278_910	XM_016104789.2	322	344	335	-37	-25.6	0.691892	11	5-12,340-333;14-17,331-328;18-21,325-322	1-4,344-341[UP5];13-13,332-332[SIL];x-x,327-326[BULt]	((((..((((.((((((((....&....)))))))).))))--))))	GCCGACAGAGGAGCUUGCCUCCG&UUUUGGCAAGCUGUUCU--UGGC	1	26.8255	4	0.999996	Output/S24h/cleaveLand_result/t_plot/PC-3p-13278_910_XM_016104789.2_335_TPlot.pdf	0	0	NA	NA	NA	26.8255	0	Inf	up	2.2264e-07	2.57434e-07	yes	GO:0050789(regulation of biological process);GO:0030234(enzyme regulator activity);GO:0006810(transport);GO:0060341(regulation of cellular localization);GO:0060589(nucleoside-triphosphatase regulator activity);GO:0044425(membrane part);GO:0048209(regulation of vesicle targeting, to, from or within Golgi);GO:0009306(protein secretion);GO:0016491(oxidoreductase activity);GO:0016628(oxidoreductase a…	ko04141(Protein processing in endoplasmic reticulum)
PC-3p-13278_910	XM_016105742.2	723	747	734	-37	-25.56	0.690811	19	4-7,744-741;10-21,734-723	1-3,747-745[UP5];8-9,740-735[AILt]	((((((((((((......((((...&...))))----..))))))))))))	GCCAGGAGCAGUCCUGUGGCCACCG&UUUUGGC----AAGCUGUUCUUGGC	4	107.302	2	0.987925	Output/S24h/cleaveLand_result/t_plot/PC-3p-13278_910_XM_016105742.2_734_TPlot.pdf	0	0	NA	NA	NA	107.302	0	Inf	up	3.8116e-25	9.90703e-24	yes	NA	NA
PC-3p-13278_910	XM_016105937.2	1288	1310	1299	-37	-24.68	0.667027	11	1-7,1310-1304;10-19,1299-1290	8-9,1303-1300[AILt];20-21,1289-1288[UP3]	..((((((((((....(((((((&)))))))--..))))))))))..	UACAAGAACAGCAGAGGCCGAAA&UUUUGGC--AAGCUGUUCUUGGC	0	0	NA	NA	NA	1	33.3045	4	1	Output/S8h/cleaveLand_result/t_plot/PC-3p-13278_910_XM_016105937.2_1299_TPlot.pdf	0	33.3045	-Inf	down	7.8779e-09	1.51467e-08	yes	GO:0016021(integral component of membrane);GO:0016020(membrane);GO:0043167(ion binding);GO:0031224(intrinsic component of membrane);GO:0044425(membrane part);GO:0046872(metal ion binding);GO:0005488(binding);GO:0008270(zinc ion binding);GO:0046914(transition metal ion binding);GO:0043169(cation binding)	ko04141(Protein processing in endoplasmic reticulum);ko04120(Ubiquitin mediated proteolysis)
PC-3p-13278_910	XM_016106246.2	662	688	679	-37	-24.1	0.651351	16.5	1-12,688-677;13-20,670-663	x-x,676-671[BULt];21-21,662-662[UP3]	.((((((((......((((((((((((&))))))))))))------)))))))).	UCCAGGGGCUUCUUCAGCUUGCUAAGA&UUUUGGCAAGCU------GUUCUUGGC	1	26.8255	4	1	Output/S24h/cleaveLand_result/t_plot/PC-3p-13278_910_XM_016106246.2_679_TPlot.pdf	0	0	NA	NA	NA	26.8255	0	Inf	up	2.2264e-07	2.57434e-07	yes	GO:0046914(transition metal ion binding);GO:0097159(organic cyclic compound binding);GO:0008270(zinc ion binding);GO:0003676(nucleic acid binding);GO:0043169(cation binding);GO:0046872(metal ion binding);GO:0005488(binding);GO:1901363(heterocyclic compound binding);GO:0043167(ion binding)	NA
PC-3p-13278_910	XM_016107099.2	1371	1392	1383	-37	-25.1	0.678378	9.5	1-11,1392-1382;13-21,1379-1371	12-12,1381-1380[AILt]	(((((((((..(((((((((((&)))))))))))-.)))))))))	GCCAGGGAUUUGUUUGCUGAGA&UUUUGGCAAGC-UGUUCUUGGC	1	26.8255	4	1	Output/S24h/cleaveLand_result/t_plot/PC-3p-13278_910_XM_016107099.2_1383_TPlot.pdf	0	0	NA	NA	NA	26.8255	0	Inf	up	2.2264e-07	2.57434e-07	yes	NA	NA
PC-3p-13278_910	XM_016107255.2	481	501	492	-37	-24.7	0.667568	6.5	1-9,501-493;11-18,491-484;21-21,481-481	10-10,492-492[SIL];19-20,483-482[SIL]	(..((((((((.(((((((((&))))))))).))))))))..)	GAAAAGGGCAGGUUGCCAGAG&UUUUGGCAAGCUGUUCUUGGC	2	53.6509	2	0.999907	Output/S24h/cleaveLand_result/t_plot/PC-3p-13278_910_XM_016107255.2_492_TPlot.pdf	0	0	NA	NA	NA	53.6509	0	Inf	up	2.3929e-13	1.027e-12	yes	GO:0006793(phosphorus metabolic process);GO:0032555(purine ribonucleotide binding);GO:0016740(transferase activity);GO:0008152(metabolic process);GO:1901363(heterocyclic compound binding);GO:0016310(phosphorylation);GO:0006796(phosphate-containing compound metabolic process);GO:0006468(protein phosphorylation);GO:0035639(purine ribonucleoside triphosphate binding);GO:1901265(nucleoside phosphate …	NA
PC-3p-13278_910	XM_016108263.2	529	550	540	-37	-25.1	0.678378	7.5	1-7,550-544;9-12,541-538;14-21,536-529	8-8,543-542[AILt];13-13,537-537[SIL]	((((((((.((((..(((((((&)))))))-.)))).))))))))	GCCGGGAAAAGCUCAGCCAGAG&UUUUGGC-AAGCUGUUCUUGGC	8	214.604	2	0.998123	Output/S24h/cleaveLand_result/t_plot/PC-3p-13278_910_XM_016108263.2_540_TPlot.pdf	3	99.9134	2	0.994447	Output/S8h/cleaveLand_result/t_plot/PC-3p-13278_910_XM_016108263.2_540_TPlot.pdf	214.604	99.9134	1.10293	up	9.9613e-11	4.0993e-10	yes	NA	ko04075(Plant hormone signal transduction);ko01100(Metabolic pathways);ko01230(Biosynthesis of amino acids);ko01110(Biosynthesis of secondary metabolites);ko00020(Citrate cycle (TCA cycle));ko00630(Glyoxylate and dicarboxylate metabolism);ko01210(2-Oxocarboxylic acid metabolism);ko01200(Carbon metabolism);ko04016(MAPK signaling pathway - plant)
PC-3p-13278_910	XM_016108368.2	782	802	793	-37	-24.8	0.67027	4	1-13,802-790;15-16,788-787;18-20,785-783	14-14,789-789[SIL];17-17,786-786[SIL];21-21,782-782[UP3]	.(((.((.(((((((((((((&))))))))))))).)).))).	ACCAUGAUCAGCUUGUCAAAA&UUUUGGCAAGCUGUUCUUGGC	1	26.8255	4	1	Output/S24h/cleaveLand_result/t_plot/PC-3p-13278_910_XM_016108368.2_793_TPlot.pdf	0	0	NA	NA	NA	26.8255	0	Inf	up	2.2264e-07	2.57434e-07	yes	GO:0005524(ATP binding);GO:1901363(heterocyclic compound binding);GO:1901564(organonitrogen compound metabolic process);GO:0043170(macromolecule metabolic process);GO:0008152(metabolic process);GO:0003824(catalytic activity);GO:0044237(cellular metabolic process);GO:0032555(purine ribonucleotide binding);GO:0043167(ion binding);GO:0036211(protein modification process);GO:0006468(protein phosphory…	ko03008(Ribosome biogenesis in eukaryotes);ko04712(Circadian rhythm - plant)
PC-3p-13278_910	XM_016108560.2	923	949	940	-37	-25.4	0.686486	15	6-17,944-933;18-21,926-923	1-5,949-945[UP5];x-x,932-927[BULt]	((((......((((((((((((.....&.....))))))))))))------))))	GCCAACCUGAAGAACAGCUUGCAACUU&UUUUGGCAAGCUGUUCU------UGGC	0	0	NA	NA	NA	1	33.3045	4	0.999994	Output/S8h/cleaveLand_result/t_plot/PC-3p-13278_910_XM_016108560.2_940_TPlot.pdf	0	33.3045	-Inf	down	7.8779e-09	1.51467e-08	yes	GO:0003824(catalytic activity)	NA
PC-3p-13278_910	XM_016109018.2	1085	1107	1096	-37	-25.4	0.686486	12.5	4-6,1104-1102;8-21,1098-1085	1-3,1107-1105[UP5];7-7,1101-1099[AILt]	((((((((((((((...(((...&...)))--.))))))))))))))	GCCAAGGACGGCUUUCUCCACCG&UUUUGG--CAAGCUGUUCUUGGC	0	0	NA	NA	NA	1	33.3045	4	0.99999	Output/S8h/cleaveLand_result/t_plot/PC-3p-13278_910_XM_016109018.2_1096_TPlot.pdf	0	33.3045	-Inf	down	7.8779e-09	1.51467e-08	yes	GO:0098754(detoxification);GO:0016684(oxidoreductase activity, acting on peroxide as acceptor);GO:0005509(calcium ion binding);GO:0008152(metabolic process);GO:0003824(catalytic activity);GO:0098869(cellular oxidant detoxification);GO:0046872(metal ion binding);GO:0016209(antioxidant activity);GO:0016174(NAD(P)H oxidase activity);GO:0044425(membrane part);GO:0016651(oxidoreductase activity, actin…	ko04626(Plant-pathogen interaction);ko04016(MAPK signaling pathway - plant)
PC-3p-13278_910	XM_016109552.2	1126	1146	1137	-37	-24.7	0.667568	7.5	1-5,1146-1142;7-17,1140-1130;19-21,1128-1126	6-6,1141-1141[SIL];18-18,1129-1129[SIL]	(((.(((((((((((.(((((&))))).))))))))))).)))	GCUUAGAACGGUUUGGCGAGA&UUUUGGCAAGCUGUUCUUGGC	0	0	NA	NA	NA	1	33.3045	4	1	Output/S8h/cleaveLand_result/t_plot/PC-3p-13278_910_XM_016109552.2_1137_TPlot.pdf	0	33.3045	-Inf	down	7.8779e-09	1.51467e-08	yes	GO:0046483(heterocycle metabolic process);GO:0030554(adenyl nucleotide binding);GO:0009987(cellular process);GO:0044424(intracellular part);GO:0048731(system development);GO:0035670(plant-type ovary development);GO:0048437(floral organ development);GO:0043227(membrane-bounded organelle);GO:0048438(floral whorl development);GO:0097367(carbohydrate derivative binding);GO:0022414(reproductive proces…	ko00970(Aminoacyl-tRNA biosynthesis)
PC-3p-13278_910	XM_016109773.2	1081	1106	1097	-37	-29.6	0.8	10.5	4-14,1103-1093;15-21,1087-1081	1-3,1106-1104[UP5];x-x,1092-1088[BULt]	(((((((.....(((((((((((...&...)))))))))))-----)))))))	GCCGAGAUAAGAACAGCUUGCCAUAG&UUUUGGCAAGCUGU-----UCUUGGC	0	0	NA	NA	NA	1	33.3045	4	0.386937	Output/S8h/cleaveLand_result/t_plot/PC-3p-13278_910_XM_016109773.2_1097_TPlot.pdf	0	33.3045	-Inf	down	7.8779e-09	1.51467e-08	yes	GO:0016020(membrane)	NA
PC-3p-13278_910	XM_016111091.2	608	630	621	-37	-24.2	0.654054	9.5	1-12,630-619;13-15,616-614;18-21,611-608	x-x,618-617[BULt];16-17,613-612[SIL]	((((..(((..((((((((((((&))))))))))))--)))..))))	GCCGUCGGCGAGGCUUGCCAGAA&UUUUGGCAAGCU--GUUCUUGGC	3	80.4764	2	0.999998	Output/S24h/cleaveLand_result/t_plot/PC-3p-13278_910_XM_016111091.2_621_TPlot.pdf	2	66.6089	3	0.955051	Output/S8h/cleaveLand_result/t_plot/PC-3p-13278_910_XM_016111091.2_621_TPlot.pdf	80.4764	66.6089	0.27285	up	0.25284	0.265574	yes	GO:0004471(malate dehydrogenase (decarboxylating) (NAD+) activity);GO:0050662(coenzyme binding);GO:0036094(small molecule binding);GO:0006082(organic acid metabolic process);GO:1901363(heterocyclic compound binding);GO:0016614(oxidoreductase activity, acting on CH-OH group of donors);GO:1901265(nucleoside phosphate binding);GO:0004470(malic enzyme activity);GO:0043648(dicarboxylic acid metabolic …	ko01100(Metabolic pathways);ko00620(Pyruvate metabolism);ko01200(Carbon metabolism);ko00710(Carbon fixation in photosynthetic organisms)
PC-3p-13278_910	XM_016112376.2	2604	2626	2617	-37	-25	0.675676	8.5	2-10,2625-2617;12-17,2616-2611;18-21,2607-2604	1-1,2626-2626[UP5];11-11,x-x[BULq];x-x,2610-2608[BULt]	((((...((((((-(((((((((.&.))))))))).))))))---))))	GCCAAUGGGAACA-CUUGCCGAGG&UUUUGGCAAGCUGUUCU---UGGC	0	0	NA	NA	NA	1	33.3045	4	1	Output/S8h/cleaveLand_result/t_plot/PC-3p-13278_910_XM_016112376.2_2617_TPlot.pdf	0	33.3045	-Inf	down	7.8779e-09	1.51467e-08	yes	NA	NA
PC-3p-13278_910	XM_016112574.2	939	959	950	-37	-26.3	0.710811	7	2-4,958-956;6-21,954-939	1-1,959-959[UP5];5-5,955-955[SIL]	((((((((((((((((.(((.&.))).))))))))))))))))	GUUGAGGACAGCUUGUGAGAG&UUUUGGCAAGCUGUUCUUGGC	1	26.8255	4	0.997617	Output/S24h/cleaveLand_result/t_plot/PC-3p-13278_910_XM_016112574.2_950_TPlot.pdf	4	133.218	3	0.386015	Output/S8h/cleaveLand_result/t_plot/PC-3p-13278_910_XM_016112574.2_950_TPlot.pdf	26.8255	133.218	-2.31211	down	4.0912e-17	4.60502e-16	yes	GO:0005488(binding);GO:0030554(adenyl nucleotide binding);GO:0097159(organic cyclic compound binding);GO:0043167(ion binding);GO:1901265(nucleoside phosphate binding);GO:0043168(anion binding);GO:1901363(heterocyclic compound binding);GO:0017076(purine nucleotide binding);GO:0036094(small molecule binding);GO:0032559(adenyl ribonucleotide binding);GO:0005524(ATP binding);GO:0097367(carbohydrate d…	ko04141(Protein processing in endoplasmic reticulum);ko04144(Endocytosis);ko03040(Spliceosome)
PC-3p-13278_910	XM_016113911.2	275	299	290	-37	-27.8	0.751351	8.5	1-12,299-288;14-14,286-286;15-21,281-275	13-13,287-287[SIL];x-x,285-282[BULt]	(((((((....(.((((((((((((&)))))))))))).)----)))))))	GCCGAGGUUCUGGAGCUUGCCGGAA&UUUUGGCAAGCUGU----UCUUGGC	3	80.4764	2	0.521724	Output/S24h/cleaveLand_result/t_plot/PC-3p-13278_910_XM_016113911.2_290_TPlot.pdf	0	0	NA	NA	NA	80.4764	0	Inf	up	2.9371e-19	3.48128e-18	yes	GO:0005634(nucleus);GO:0031323(regulation of cellular metabolic process);GO:0040029(regulation of gene expression, epigenetic);GO:0097159(organic cyclic compound binding);GO:0044428(nuclear part);GO:0071840(cellular component organization or biogenesis);GO:0016043(cellular component organization);GO:0000785(chromatin);GO:0000228(nuclear chromosome);GO:0006342(chromatin silencing);GO:0046982(prote…	NA
PC-3p-13278_910	XM_016113994.2	210	230	221	-37	-25.7	0.694595	5.5	1-15,230-216;17-20,214-211	16-16,215-215[SIL];21-21,210-210[UP3]	.((((.(((((((((((((((&))))))))))))))).)))).	ACCAAAGGCAGCUUGCUAAGG&UUUUGGCAAGCUGUUCUUGGC	0	0	NA	NA	NA	1	33.3045	4	0.999847	Output/S8h/cleaveLand_result/t_plot/PC-3p-13278_910_XM_016113994.2_221_TPlot.pdf	0	33.3045	-Inf	down	7.8779e-09	1.51467e-08	yes	GO:0044464(cell part);GO:0005622(intracellular);GO:0016043(cellular component organization);GO:0006999(nuclear pore organization);GO:0017056(structural constituent of nuclear pore);GO:0043229(intracellular organelle);GO:0005635(nuclear envelope);GO:0005643(nuclear pore);GO:0032991(macromolecular complex);GO:0044446(intracellular organelle part);GO:0005198(structural molecule activity);GO:0044422(…	NA
PC-3p-13278_910	XM_016114107.2	947	970	961	-37	-25.24	0.682162	8	3-14,968-957;16-20,952-948	1-2,970-969[UP5];15-15,956-953[AILt];21-21,947-947[UP3]	.(((((....((((((((((((..&..))))))))))))---.))))).	UCCAAGCAGCACAGCUUGCCAAUC&UUUUGGCAAGCUGU---UCUUGGC	2	53.6509	2	0.995899	Output/S24h/cleaveLand_result/t_plot/PC-3p-13278_910_XM_016114107.2_961_TPlot.pdf	0	0	NA	NA	NA	53.6509	0	Inf	up	2.3929e-13	1.027e-12	yes	NA	ko03018(RNA degradation)
PC-3p-13278_910	XM_016114330.2	186	207	197	-37	-25.52	0.68973	12	3-7,205-201;11-21,196-186	1-2,207-206[UP5];8-10,200-197[AILt]	(((((((((((....(((((..&..)))))-...)))))))))))	GCCAAGGGCAGAAACGCCAAUC&UUUUGGC-AAGCUGUUCUUGGC	0	0	NA	NA	NA	1	33.3045	4	0.999978	Output/S8h/cleaveLand_result/t_plot/PC-3p-13278_910_XM_016114330.2_197_TPlot.pdf	0	33.3045	-Inf	down	7.8779e-09	1.51467e-08	yes	GO:1901363(heterocyclic compound binding);GO:0005488(binding);GO:0097159(organic cyclic compound binding);GO:0003676(nucleic acid binding)	ko03008(Ribosome biogenesis in eukaryotes);ko03013(RNA transport)
PC-3p-13278_910	XM_016114902.2	3399	3418	3409	-37	-27.5	0.743243	6.5	3-11,3416-3408;13-17,3406-3402;19-21,3401-3399	1-2,3418-3417[UP5];12-12,3407-3407[SIL];18-18,x-x[BULq]	(((-(((((.(((((((((..&..))))))))).))))).)))	GCC-AGAGCUGCUUGCCAACA&UUUUGGCAAGCUGUUCUUGGC	1	26.8255	4	0.915958	Output/S24h/cleaveLand_result/t_plot/PC-3p-13278_910_XM_016114902.2_3409_TPlot.pdf	0	0	NA	NA	NA	26.8255	0	Inf	up	2.2264e-07	2.57434e-07	yes	NA	ko03410(Base excision repair)
PC-3p-13278_910	XM_016115446.2	240	258	251	-37	-24.9	0.672973	8.5	2-7,257-252;10-19,251-242;21-21,240-240	1-1,258-258[UP5];8-9,x-x[BULq];20-20,241-241[SIL]	(.((((((((((--((((((.&.))))))..)))))))))).)	GGCAAGAGCAGC--GCCGAGG&UUUUGGCAAGCUGUUCUUGGC	0	0	NA	NA	NA	1	33.3045	4	1	Output/S8h/cleaveLand_result/t_plot/PC-3p-13278_910_XM_016115446.2_251_TPlot.pdf	0	33.3045	-Inf	down	7.8779e-09	1.51467e-08	yes	GO:0044464(cell part);GO:0006082(organic acid metabolic process);GO:0046872(metal ion binding);GO:0016740(transferase activity);GO:0050667(homocysteine metabolic process);GO:0006807(nitrogen compound metabolic process);GO:0000097(sulfur amino acid biosynthetic process);GO:0044272(sulfur compound biosynthetic process);GO:1901607(alpha-amino acid biosynthetic process);GO:0003824(catalytic activity)…	ko01100(Metabolic pathways);ko01230(Biosynthesis of amino acids);ko00270(Cysteine and methionine metabolism);ko01110(Biosynthesis of secondary metabolites);ko00450(Selenocompound metabolism)
PC-3p-13278_910	XM_016115883.2	804	825	816	-37	-24.7	0.667568	10	4-17,822-809;20-21,805-804	1-3,825-823[UP5];18-19,808-806[AILt]	((...((((((((((((((...&...))))))))))))))-..))	GCAAUGGAGCAGUUUGCCACCA&UUUUGGCAAGCUGUUCU-UGGC	0	0	NA	NA	NA	2	66.6089	2	0.999602	Output/S8h/cleaveLand_result/t_plot/PC-3p-13278_910_XM_016115883.2_816_TPlot.pdf	0	66.6089	-Inf	down	3.3071e-16	2.22267e-15	yes	GO:0031224(intrinsic component of membrane);GO:0044425(membrane part);GO:0016020(membrane);GO:0016021(integral component of membrane)	NA
PC-3p-13278_910	XM_016116271.2	1016	1043	1034	-37	-24.9	0.672973	19	1-11,1043-1033;12-12,1025-1025;14-21,1023-1016	x-x,1032-1026[BULt];13-13,1024-1024[SIL]	((((((((.(.......(((((((((((&)))))))))))-------).))))))))	GCUAAGAGGGUUUUGACGCUUGCCGAGA&UUUUGGCAAGC-------UGUUCUUGGC	2	53.6509	3	0.870776	Output/S24h/cleaveLand_result/t_plot/PC-3p-13278_910_XM_016116271.2_1034_TPlot.pdf	1	33.3045	4	1	Output/S8h/cleaveLand_result/t_plot/PC-3p-13278_910_XM_016116271.2_1034_TPlot.pdf	53.6509	33.3045	0.687888	up	0.029111	0.0312173	yes	GO:1901576(organic substance biosynthetic process);GO:0043226(organelle);GO:0008483(transaminase activity);GO:0044283(small molecule biosynthetic process);GO:0005737(cytoplasm);GO:0044249(cellular biosynthetic process);GO:0032787(monocarboxylic acid metabolic process);GO:0019438(aromatic compound biosynthetic process);GO:0006807(nitrogen compound metabolic process);GO:0044464(cell part);GO:000608…	ko00790(Folate biosynthesis)
PC-3p-13278_910	XM_016116409.2	2009	2030	2021	-37	-24.4	0.659459	9	4-13,2027-2018;14-20,2016-2010	1-3,2030-2028[UP5];x-x,2017-2017[BULt];21-21,2009-2009[UP3]	.(((((((.((((((((((...&...))))))))))-))))))).	ACUGGGGAUCAGCUUGCCAUCG&UUUUGGCAAGCUG-UUCUUGGC	1	26.8255	4	1	Output/S24h/cleaveLand_result/t_plot/PC-3p-13278_910_XM_016116409.2_2021_TPlot.pdf	0	0	NA	NA	NA	26.8255	0	Inf	up	2.2264e-07	2.57434e-07	yes	GO:0043226(organelle);GO:0065007(biological regulation);GO:0022853(active ion transmembrane transporter activity);GO:0042626(ATPase activity, coupled to transmembrane movement of substances);GO:0016817(hydrolase activity, acting on acid anhydrides);GO:0006793(phosphorus metabolic process);GO:0022890(inorganic cation transmembrane transporter activity);GO:0006796(phosphate-containing compound meta…	ko00190(Oxidative phosphorylation)
PC-3p-13278_910	XM_016116955.2	462	482	473	-37	-24.3	0.656757	9	2-9,481-474;12-21,471-462	1-1,482-482[UP5];10-11,473-472[SIL]	((((((((((..((((((((.&.))))))))..))))))))))	GUCGGGGACAAGUUGCCGGAG&UUUUGGCAAGCUGUUCUUGGC	17	456.033	2	0.999997	Output/S24h/cleaveLand_result/t_plot/PC-3p-13278_910_XM_016116955.2_473_TPlot.pdf	6	199.827	2	0.99997	Output/S8h/cleaveLand_result/t_plot/PC-3p-13278_910_XM_016116955.2_473_TPlot.pdf	456.033	199.827	1.19039	up	1.4361e-23	2.78872e-22	yes	GO:0009057(macromolecule catabolic process);GO:0006807(nitrogen compound metabolic process);GO:0005576(extracellular region);GO:0043227(membrane-bounded organelle);GO:0009987(cellular process);GO:0016021(integral component of membrane);GO:0070011(peptidase activity, acting on L-amino acid peptides);GO:0009056(catabolic process);GO:0005622(intracellular);GO:0004197(cysteine-type endopeptidase acti…	ko04145(Phagosome)
PC-3p-13278_910	XM_016117284.2	2214	2237	2228	-37	-27.5	0.743243	8.5	3-14,2235-2224;15-16,2220-2219;18-21,2217-2214	1-2,2237-2236[UP5];x-x,2223-2221[BULt];17-17,2218-2218[SIL]	((((.((...((((((((((((..&..))))))))))))---)).))))	GCCAUGACAUGCGGCUUGCCAACC&UUUUGGCAAGCUGU---UCUUGGC	2	53.6509	3	0.220075	Output/S24h/cleaveLand_result/t_plot/PC-3p-13278_910_XM_016117284.2_2228_TPlot.pdf	1	33.3045	4	0.878284	Output/S8h/cleaveLand_result/t_plot/PC-3p-13278_910_XM_016117284.2_2228_TPlot.pdf	53.6509	33.3045	0.687888	up	0.029111	0.0312173	yes	GO:0016757(transferase activity, transferring glycosyl groups);GO:0051704(multi-organism process);GO:0009311(oligosaccharide metabolic process);GO:0009877(nodulation);GO:0044419(interspecies interaction between organisms);GO:0044237(cellular metabolic process);GO:0008194(UDP-glycosyltransferase activity);GO:0046527(glucosyltransferase activity);GO:0005984(disaccharide metabolic process);GO:000815…	ko01100(Metabolic pathways);ko00500(Starch and sucrose metabolism)
PC-3p-13278_910	XM_016117984.2	537	557	548	-37	-25.5	0.689189	6	1-4,557-554;6-20,552-538	5-5,553-553[SIL];21-21,537-537[UP3]	.(((((((((((((((.((((&)))).))))))))))))))).	ACCAAGAAUGGCUUGCAGAAG&UUUUGGCAAGCUGUUCUUGGC	1	26.8255	4	0.999998	Output/S24h/cleaveLand_result/t_plot/PC-3p-13278_910_XM_016117984.2_548_TPlot.pdf	1	33.3045	4	0.999985	Output/S8h/cleaveLand_result/t_plot/PC-3p-13278_910_XM_016117984.2_548_TPlot.pdf	26.8255	33.3045	-0.312112	down	0.40341	0.405116	yes	GO:0003824(catalytic activity);GO:0043170(macromolecule metabolic process);GO:0019538(protein metabolic process);GO:0036094(small molecule binding);GO:0097367(carbohydrate derivative binding);GO:0017076(purine nucleotide binding);GO:0032555(purine ribonucleotide binding);GO:0005488(binding);GO:0043168(anion binding);GO:0044238(primary metabolic process);GO:0032553(ribonucleotide binding);GO:00163…	NA
PC-3p-13278_910	XM_016117985.2	536	556	547	-37	-25.5	0.689189	6	1-4,556-553;6-20,551-537	5-5,552-552[SIL];21-21,536-536[UP3]	.(((((((((((((((.((((&)))).))))))))))))))).	ACCAAGAAUGGCUUGCAGAAG&UUUUGGCAAGCUGUUCUUGGC	1	26.8255	4	0.999999	Output/S24h/cleaveLand_result/t_plot/PC-3p-13278_910_XM_016117985.2_547_TPlot.pdf	0	0	NA	NA	NA	26.8255	0	Inf	up	2.2264e-07	2.57434e-07	yes	GO:0003824(catalytic activity);GO:0043170(macromolecule metabolic process);GO:0019538(protein metabolic process);GO:0036094(small molecule binding);GO:0097367(carbohydrate derivative binding);GO:0017076(purine nucleotide binding);GO:0032555(purine ribonucleotide binding);GO:0005488(binding);GO:0043168(anion binding);GO:0044238(primary metabolic process);GO:0032553(ribonucleotide binding);GO:00163…	NA
PC-3p-13278_910	XM_021124919.1	2792	2813	2803	-37	-27.1	0.732432	8	4-9,2810-2805;10-21,2803-2792	1-3,2813-2811[UP5];x-x,2804-2804[BULt]	((((((((((((.((((((...&...))))))-))))))))))))	GCCAAGAGUAGCUUUGCCAUCU&UUUUGGCAA-GCUGUUCUUGGC	0	0	NA	NA	NA	1	33.3045	4	0.923776	Output/S8h/cleaveLand_result/t_plot/PC-3p-13278_910_XM_021124919.1_2803_TPlot.pdf	0	33.3045	-Inf	down	7.8779e-09	1.51467e-08	yes	GO:0018130(heterocycle biosynthetic process);GO:0044281(small molecule metabolic process);GO:0042398(cellular modified amino acid biosynthetic process);GO:0046653(tetrahydrofolate metabolic process);GO:1901566(organonitrogen compound biosynthetic process);GO:0043648(dicarboxylic acid metabolic process);GO:1901564(organonitrogen compound metabolic process);GO:0006760(folic acid-containing compound…	ko01100(Metabolic pathways);ko00790(Folate biosynthesis)
PC-3p-13278_910	XM_021126125.1	288	309	299	-37	-25.8	0.697297	12	5-9,305-301;10-21,299-288	1-4,309-306[UP5];x-x,300-300[BULt]	((((((((((((.(((((....&....)))))-))))))))))))	GCCAGGAGCAGCUUUGUUCCUC&UUUUGGCAA-GCUGUUCUUGGC	1	26.8255	4	0.999919	Output/S24h/cleaveLand_result/t_plot/PC-3p-13278_910_XM_021126125.1_299_TPlot.pdf	0	0	NA	NA	NA	26.8255	0	Inf	up	2.2264e-07	2.57434e-07	yes	NA	NA
PC-3p-13278_910	XM_021126167.1	1163	1183	1174	-37	-27.4	0.740541	7.5	4-13,1180-1171;15-16,1169-1168;18-21,1166-1163	1-3,1183-1181[UP5];14-14,1170-1170[SIL];17-17,1167-1167[SIL]	((((.((.((((((((((...&...)))))))))).)).))))	GCCGCGAUCAGCUUGCCAUCA&UUUUGGCAAGCUGUUCUUGGC	2	53.6509	2	0.598754	Output/S24h/cleaveLand_result/t_plot/PC-3p-13278_910_XM_021126167.1_1174_TPlot.pdf	1	33.3045	4	0.890565	Output/S8h/cleaveLand_result/t_plot/PC-3p-13278_910_XM_021126167.1_1174_TPlot.pdf	53.6509	33.3045	0.687888	up	0.029111	0.0312173	yes	GO:0015197(peptide transporter activity);GO:0051641(cellular localization);GO:0019899(enzyme binding);GO:0005829(cytosol);GO:0005635(nuclear envelope);GO:0015031(protein transport);GO:0017038(protein import);GO:0008536(Ran GTPase binding);GO:0043229(intracellular organelle);GO:0051234(establishment of localization);GO:0044424(intracellular part);GO:0051179(localization);GO:0005488(binding);GO:005…	NA
PC-3p-13278_910	XM_021129247.1	1188	1209	1200	-37	-28.1	0.759459	7	3-12,1207-1198;13-16,1196-1193;18-21,1191-1188	1-2,1209-1208[UP5];x-x,1197-1197[BULt];17-17,1192-1192[SIL]	((((.((((.((((((((((..&..))))))))))-)))).))))	GCCAUGGGCAAGCUUGCCAAUC&UUUUGGCAAGCU-GUUCUUGGC	0	0	NA	NA	NA	1	33.3045	4	0.632064	Output/S8h/cleaveLand_result/t_plot/PC-3p-13278_910_XM_021129247.1_1200_TPlot.pdf	0	33.3045	-Inf	down	7.8779e-09	1.51467e-08	yes	GO:0006355(regulation of transcription, DNA-templated);GO:0019222(regulation of metabolic process);GO:0003677(DNA binding);GO:0050794(regulation of cellular process);GO:0060255(regulation of macromolecule metabolic process);GO:0050789(regulation of biological process);GO:2000112(regulation of cellular macromolecule biosynthetic process);GO:0043565(sequence-specific DNA binding);GO:1903506(regulat…	ko04075(Plant hormone signal transduction)
PC-3p-13278_910	XM_021131644.1	2554	2573	2565	-37	-24.8	0.67027	9	4-8,2570-2566;10-14,2565-2561;16-21,2559-2554	1-3,2573-2571[UP5];9-9,x-x[BULq];15-15,2560-2560[SIL]	((((((.(((((-(((((...&...))))).))))).))))))	GUCAAGUGCAGC-UGCCACUA&UUUUGGCAAGCUGUUCUUGGC	1	26.8255	4	1	Output/S24h/cleaveLand_result/t_plot/PC-3p-13278_910_XM_021131644.1_2565_TPlot.pdf	0	0	NA	NA	NA	26.8255	0	Inf	up	2.2264e-07	2.57434e-07	yes	GO:0006810(transport);GO:0051179(localization);GO:0015031(protein transport);GO:0051234(establishment of localization);GO:0005622(intracellular);GO:0034613(cellular protein localization);GO:0045184(establishment of protein localization);GO:0005623(cell);GO:0006886(intracellular protein transport);GO:0046907(intracellular transport);GO:0044464(cell part);GO:0051641(cellular localization);GO:007170…	NA
PC-3p-13278_910	XM_021135755.1	64	87	75	-37	-24.82	0.670811	18.5	5-7,83-81;10-21,75-64	1-4,87-84[UP5];8-9,80-76[AILt]	((((((((((((.....(((....&....)))---..))))))))))))	GCCAAGGACAGCGUAAGGCUCGUC&UUUUGGC---AAGCUGUUCUUGGC	0	0	NA	NA	NA	3	99.9134	2	0.998431	Output/S8h/cleaveLand_result/t_plot/PC-3p-13278_910_XM_021135755.1_75_TPlot.pdf	0	99.9134	-Inf	down	1.5881e-23	2.78872e-22	yes	GO:1904680(peptide transmembrane transporter activity);GO:0070727(cellular macromolecule localization);GO:0005623(cell);GO:0071702(organic substance transport);GO:0022884(macromolecule transmembrane transporter activity);GO:0034613(cellular protein localization);GO:0071705(nitrogen compound transport);GO:0005215(transporter activity);GO:0015399(primary active transmembrane transporter activity);G…	ko04145(Phagosome);ko03060(Protein export);ko04141(Protein processing in endoplasmic reticulum)
PC-3p-13278_910	XM_021139765.1	2612	2631	2623	-37	-25.6	0.691892	9.5	3-7,2629-2625;10-21,2623-2612	1-2,2631-2630[UP5];8-9,2624-2624[AILq]	((((((((((((.-(((((..&..)))))..))))))))))))	GCCAAGAAUGGUG-GCCAAUU&UUUUGGCAAGCUGUUCUUGGC	0	0	NA	NA	NA	1	33.3045	4	0.999965	Output/S8h/cleaveLand_result/t_plot/PC-3p-13278_910_XM_021139765.1_2623_TPlot.pdf	0	33.3045	-Inf	down	7.8779e-09	1.51467e-08	yes	GO:0036094(small molecule binding);GO:0005488(binding);GO:1901265(nucleoside phosphate binding);GO:0003723(RNA binding);GO:0000166(nucleotide binding);GO:0097159(organic cyclic compound binding);GO:0003676(nucleic acid binding);GO:1901363(heterocyclic compound binding)	NA
PC-3p-13278_910	XM_021140400.1	298	320	311	-37	-25.6	0.691892	11	5-12,316-309;14-17,307-304;18-21,301-298	1-4,320-317[UP5];13-13,308-308[SIL];x-x,303-302[BULt]	((((..((((.((((((((....&....)))))))).))))--))))	GCCGACAGAGGAGCUUGCCUCCG&UUUUGGCAAGCUGUUCU--UGGC	1	26.8255	4	0.999993	Output/S24h/cleaveLand_result/t_plot/PC-3p-13278_910_XM_021140400.1_311_TPlot.pdf	0	0	NA	NA	NA	26.8255	0	Inf	up	2.2264e-07	2.57434e-07	yes	GO:0050789(regulation of biological process);GO:0030234(enzyme regulator activity);GO:0006810(transport);GO:0060341(regulation of cellular localization);GO:0060589(nucleoside-triphosphatase regulator activity);GO:0044425(membrane part);GO:0048209(regulation of vesicle targeting, to, from or within Golgi);GO:0009306(protein secretion);GO:0016491(oxidoreductase activity);GO:0016628(oxidoreductase a…	ko04141(Protein processing in endoplasmic reticulum)
PC-3p-13278_910	XM_021140420.1	540	565	552	-37	-24.4	0.659459	17.5	5-7,561-559;8-10,554-552;11-21,550-540	1-4,565-562[UP5];x-x,558-555[BULt];x-x,551-551[BULt]	(((((((((((.(((....(((....&....)))----)))-)))))))))))	GCCAAGGACAGACUUGAGAGCCUCAU&UUUUGGC----AAG-CUGUUCUUGGC	3	80.4764	2	0.999988	Output/S24h/cleaveLand_result/t_plot/PC-3p-13278_910_XM_021140420.1_552_TPlot.pdf	0	0	NA	NA	NA	80.4764	0	Inf	up	2.9371e-19	3.48128e-18	yes	NA	NA
PC-3p-13278_910	XM_021140641.1	1283	1302	1293	-37	-24.8	0.67027	9.5	5-10,1298-1293;12-21,1292-1283	1-4,1302-1299[UP5];11-11,x-x[BULq]	((((((((((-((((((....&....)))))).))))))))))	GUCAAGAACA-CUUGCCUAGG&UUUUGGCAAGCUGUUCUUGGC	0	0	NA	NA	NA	1	33.3045	4	1	Output/S8h/cleaveLand_result/t_plot/PC-3p-13278_910_XM_021140641.1_1293_TPlot.pdf	0	33.3045	-Inf	down	7.8779e-09	1.51467e-08	yes	NA	ko04141(Protein processing in endoplasmic reticulum)
PC-3p-13278_910	XM_021141394.1	559	580	572	-37	-24.2	0.654054	9.5	1-8,580-573;10-12,572-570;14-21,566-559	9-9,x-x[BULq];13-13,569-567[AILt]	((((((((...(((-((((((((&)))))))).)))--.))))))))	GCCAAGAAGAAGGC-UGCCAAGG&UUUUGGCAAGCU--GUUCUUGGC	3	80.4764	2	0.999998	Output/S24h/cleaveLand_result/t_plot/PC-3p-13278_910_XM_021141394.1_572_TPlot.pdf	0	0	NA	NA	NA	80.4764	0	Inf	up	2.9371e-19	3.48128e-18	yes	GO:0043226(organelle);GO:0005488(binding);GO:0043231(intracellular membrane-bounded organelle);GO:0005509(calcium ion binding);GO:0043229(intracellular organelle);GO:0043169(cation binding);GO:0044444(cytoplasmic part);GO:0043227(membrane-bounded organelle);GO:0044464(cell part);GO:0044424(intracellular part);GO:0046872(metal ion binding);GO:0005623(cell);GO:0005622(intracellular);GO:0012505(endo…	ko01110(Biosynthesis of secondary metabolites);ko00860(Porphyrin and chlorophyll metabolism);ko01100(Metabolic pathways)
PC-3p-13278_910	XM_021142098.1	947	970	961	-37	-25.24	0.682162	8	3-14,968-957;16-20,952-948	1-2,970-969[UP5];15-15,956-953[AILt];21-21,947-947[UP3]	.(((((....((((((((((((..&..))))))))))))---.))))).	UCCAAGCAGCACAGCUUGCCAAUC&UUUUGGCAAGCUGU---UCUUGGC	1	26.8255	4	1	Output/S24h/cleaveLand_result/t_plot/PC-3p-13278_910_XM_021142098.1_961_TPlot.pdf	0	0	NA	NA	NA	26.8255	0	Inf	up	2.2264e-07	2.57434e-07	yes	NA	ko03018(RNA degradation)
PC-3p-13278_910	XM_021143289.1	2226	2246	2238	-37	-26.1	0.705405	11	5-8,2242-2239;10-12,2238-2236;13-21,2234-2226	1-4,2246-2243[UP5];9-9,x-x[BULq];x-x,2235-2235[BULt]	(((((((((.(((-((((....&....)))).)))-)))))))))	GCCAAGAACAAGC-UGCCUGGA&UUUUGGCAAGCU-GUUCUUGGC	1	26.8255	4	0.999391	Output/S24h/cleaveLand_result/t_plot/PC-3p-13278_910_XM_021143289.1_2238_TPlot.pdf	3	99.9134	2	0.880948	Output/S8h/cleaveLand_result/t_plot/PC-3p-13278_910_XM_021143289.1_2238_TPlot.pdf	26.8255	99.9134	-1.89707	down	8.4486e-11	3.48434e-10	yes	GO:0003676(nucleic acid binding);GO:0005488(binding);GO:0097159(organic cyclic compound binding);GO:1901363(heterocyclic compound binding)	NA
PC-3p-1355_7915	BGI_novel_T002883	429	449	440	-29.6	-19.7	0.665541	9	1-13,449-437	14-21,436-429[UP3]	........(((((((((((((&)))))))))))))........	UUCUCAAACAGACUCUUACCA&UGGUAAGAGUUUGAUUAAGUA	0	0	NA	NA	NA	1	33.3045	4	0.999863	Output/S8h/cleaveLand_result/t_plot/PC-3p-1355_7915_BGI_novel_T002883_440_TPlot.pdf	0	33.3045	-Inf	down	7.8779e-09	1.51467e-08	yes	GO:0043231(intracellular membrane-bounded organelle);GO:0003677(DNA binding);GO:0005623(cell);GO:0043226(organelle);GO:0003676(nucleic acid binding);GO:0005488(binding);GO:0005622(intracellular);GO:0043229(intracellular organelle);GO:0097159(organic cyclic compound binding);GO:0044424(intracellular part);GO:0044464(cell part);GO:0043227(membrane-bounded organelle);GO:0005634(nucleus);GO:0003700(D…	ko04016(MAPK signaling pathway - plant)
PC-3p-1355_7915	BGI_novel_T003897	3659	3680	3672	-29.6	-20.8	0.702703	6	1-7,3680-3674;9-17,3673-3665;18-20,3662-3660	8-8,x-x[BULq];x-x,3664-3663[BULt];21-21,3659-3659[UP3]	.(((..(((((((((-(((((((&))))))).)))))))))--))).	AGCUGAUGAUCAAAC-CUUACCA&UGGUAAGAGUUUGAUUA--AGUA	1	26.8255	4	0.979064	Output/S24h/cleaveLand_result/t_plot/PC-3p-1355_7915_BGI_novel_T003897_3672_TPlot.pdf	0	0	NA	NA	NA	26.8255	0	Inf	up	2.2264e-07	2.57434e-07	yes	GO:0004030(aldehyde dehydrogenase [NAD(P)+] activity);GO:0055114(oxidation-reduction process);GO:0003824(catalytic activity);GO:0004028(3-chloroallyl aldehyde dehydrogenase activity);GO:0016903(oxidoreductase activity, acting on the aldehyde or oxo group of donors);GO:0006081(cellular aldehyde metabolic process);GO:0004029(aldehyde dehydrogenase (NAD) activity);GO:0016620(oxidoreductase activity,…	ko00410(beta-Alanine metabolism);ko00561(Glycerolipid metabolism);ko00330(Arginine and proline metabolism);ko00071(Fatty acid degradation);ko01110(Biosynthesis of secondary metabolites);ko00340(Histidine metabolism);ko00310(Lysine degradation);ko00380(Tryptophan metabolism);ko00280(Valine, leucine and isoleucine degradation);ko00053(Ascorbate and aldarate metabolism);ko00010(Glycolysis / Gluconeo…
PC-3p-1355_7915	BGI_novel_T008365	1024	1044	1035	-29.6	-20.3	0.685811	9	2-14,1043-1031	1-1,1044-1044[UP5];15-21,1030-1024[UP3]	.......(((((((((((((.&.))))))))))))).......	UCAUUCCUCAGACUCUUACCU&UGGUAAGAGUUUGAUUAAGUA	1	26.8255	4	0.999391	Output/S24h/cleaveLand_result/t_plot/PC-3p-1355_7915_BGI_novel_T008365_1035_TPlot.pdf	0	0	NA	NA	NA	26.8255	0	Inf	up	2.2264e-07	2.57434e-07	yes	GO:0098796(membrane protein complex);GO:0043226(organelle);GO:0072546(ER membrane protein complex);GO:0031984(organelle subcompartment);GO:0044422(organelle part);GO:0005622(intracellular);GO:0044432(endoplasmic reticulum part);GO:0030176(integral component of endoplasmic reticulum membrane);GO:0044444(cytoplasmic part);GO:0006457(protein folding);GO:0044424(intracellular part);GO:0031227(intrins…	NA
PC-3p-1355_7915	BGI_novel_T013524	924	949	940	-29.6	-20.3	0.685811	15	2-10,948-940;11-20,934-925	1-1,949-949[UP5];x-x,939-935[BULt];21-21,924-924[UP3]	.((((((((((.....(((((((((.&.)))))))))-----)))))))))).	AACUUAAUCAGGAGAUACUCUUGCUU&UGGUAAGAGU-----UUGAUUAAGUA	0	0	NA	NA	NA	1	33.3045	4	0.997355	Output/S8h/cleaveLand_result/t_plot/PC-3p-1355_7915_BGI_novel_T013524_940_TPlot.pdf	0	33.3045	-Inf	down	7.8779e-09	1.51467e-08	yes	GO:0032553(ribonucleotide binding);GO:0035639(purine ribonucleoside triphosphate binding);GO:0032559(adenyl ribonucleotide binding);GO:0016773(phosphotransferase activity, alcohol group as acceptor);GO:1901363(heterocyclic compound binding);GO:0032555(purine ribonucleotide binding);GO:0030554(adenyl nucleotide binding);GO:0016301(kinase activity);GO:0043167(ion binding);GO:0005488(binding);GO:000…	NA
PC-3p-1355_7915	XM_016076320.2	1468	1485	1476	-29.6	-20.5	0.692568	8	2-14,1484-1472;18-20,1471-1469	1-1,1485-1485[UP5];15-17,x-x[BULq];21-21,1468-1468[UP3]	.(((---(((((((((((((.&.)))))))))))))...))).	AACU---UCGAGCUCUUGCCG&UGGUAAGAGUUUGAUUAAGUA	1	26.8255	4	0.994915	Output/S24h/cleaveLand_result/t_plot/PC-3p-1355_7915_XM_016076320.2_1476_TPlot.pdf	1	33.3045	4	0.988276	Output/S8h/cleaveLand_result/t_plot/PC-3p-1355_7915_XM_016076320.2_1476_TPlot.pdf	26.8255	33.3045	-0.312112	down	0.40341	0.405116	yes	GO:0043167(ion binding);GO:1901360(organic cyclic compound metabolic process);GO:0003824(catalytic activity);GO:0004497(monooxygenase activity);GO:0005488(binding);GO:0016709(oxidoreductase activity, acting on paired donors, with incorporation or reduction of molecular oxygen, NAD(P)H as one donor, and incorporation of one atom of oxygen);GO:0097159(organic cyclic compound binding);GO:1901363(het…	ko01100(Metabolic pathways);ko00360(Phenylalanine metabolism);ko00945(Stilbenoid, diarylheptanoid and gingerol biosynthesis);ko00941(Flavonoid biosynthesis);ko00130(Ubiquinone and other terpenoid-quinone biosynthesis);ko00940(Phenylpropanoid biosynthesis);ko01110(Biosynthesis of secondary metabolites)
PC-3p-1355_7915	XM_016077858.2	396	415	407	-29.6	-20.4	0.689189	9	2-5,414-411;7-16,410-401;18-20,399-397	1-1,415-415[UP5];6-6,x-x[BULq];17-17,400-400[SIL];21-21,396-396[UP3]	.(((.((((((((((-((((.&.)))).)))))))))).))).	AGCUGGAUCAGGCUC-UGCCU&UGGUAAGAGUUUGAUUAAGUA	2	53.6509	3	0.447068	Output/S24h/cleaveLand_result/t_plot/PC-3p-1355_7915_XM_016077858.2_407_TPlot.pdf	0	0	NA	NA	NA	53.6509	0	Inf	up	2.3929e-13	1.027e-12	yes	NA	NA
[truncated: 18,452 more rows]
