# Supplementary material for: Integration of Small RNA and Degradome Sequencing Reveals the Regulatory Network of Al-Induced Programmed Cell Death in Peanut
Source: Int J Mol Sci. 2021 Dec 27;23(1):246. doi: 10.3390/ijms23010246 (PMC8745729; doi:10.3390/ijms23010246)
Supplement: Supplementary file 1 [file ijms-23-00246-s001.zip › Table S6 Identified targets for Al-responsive miRNAs in peanut.xlsx]

## Sheet: Sheet1
Table S7 Identified targets for Al-responsive miRNAs in peanut
Query	Transcript	annotation	AllenScore	Sequence	GO	KEGG
ahy-miR156b-5p_1ss10GT	BGI_novel_T002318	gi|502077326|ref|XP_004485620.1;PREDICTED: U3 small nucleolar RNA-associated protein 18 homolog [Cicer arietinum]	11	UGGCUCUCUGUAUUCCCCUGUUGA&UUGACA---GAAUAUAGAGAGCAC	GO:0046483(heterocycle metabolic process);GO:0042274(ribosomal small subunit biogenesis);GO:0006396(RNA processing);GO:0034388(Pwp2p-containing subcomplex of 90S preribosome);GO:0044422(organelle part);GO:0034660(ncRNA metabolic process);GO:0006139(nucleobase-containing compound metabolic process);GO:0043231(intracellular membrane-bounded organelle);GO:0006725(cellular aromatic compound metabolic…	ko03008(Ribosome biogenesis in eukaryotes)
ahy-miR156b-5p_1ss10GT	BGI_novel_T006458	gi|734388436|gb|KHN25702.1;Lysine-specific demethylase rbr-2 [Glycine soja];gi|571433206|ref|XP_006572794.1;PREDICTED: uncharacterized protein LOC100305864 isoform X1 [Glycine max];gi|525313262|ref|NP_001266040.1;uncharacterized protein LOC101496715 [Cicer arietinum]	7	UAGCUUUUUGUAUUCUGUCUU&UUGACAGAAUAUAGAGAGCAC	GO:1901363(heterocyclic compound binding);GO:0006396(RNA processing);GO:0090304(nucleic acid metabolic process);GO:0044085(cellular component biogenesis);GO:0044260(cellular macromolecule metabolic process);GO:0043170(macromolecule metabolic process);GO:0006139(nucleobase-containing compound metabolic process);GO:0008152(metabolic process);GO:0044237(cellular metabolic process);GO:0016072(rRNA me…	NA
ahy-miR156b-5p_1ss10GT	BGI_novel_T007434	gi|296939591|gb|ADH95190.1;S-adenosylmethionine decarboxylase [Arachis hypogaea]	5	UUGUUUUCUACAUUCUGUCGA&UUGACAGAAUAUAGAGAGCAC	GO:0042278(purine nucleoside metabolic process);GO:0046499(S-adenosylmethioninamine metabolic process);GO:0009116(nucleoside metabolic process);GO:0006557(S-adenosylmethioninamine biosynthetic process);GO:1901135(carbohydrate derivative metabolic process);GO:0003824(catalytic activity);GO:0009309(amine biosynthetic process);GO:0018130(heterocycle biosynthetic process);GO:0006597(spermine biosynth…	ko01100(Metabolic pathways);ko00270(Cysteine and methionine metabolism);ko00330(Arginine and proline metabolism)
ahy-miR156b-5p_1ss10GT	XM_016076101.2	gi|571474253|ref|XP_003530824.2;PREDICTED: vacuolar cation/proton exchanger 5-like isoform X1 [Glycine max];gi|951040233|ref|XP_014517618.1;PREDICTED: vacuolar cation/proton exchanger 5-like isoform X3 [Vigna radiata var. radiata];gi|951040223|ref|XP_014517616.1;PREDICTED: vacuolar cation/proton exchanger 5-like isoform X1 [Vigna radiata var. radiata]	6	GUGGUCUCUAUAUCUCUG-CGA&UUGACAGA-AUAUAGAGAGCAC	GO:0005215(transporter activity);GO:0015299(solute:proton antiporter activity);GO:0006816(calcium ion transport);GO:0046873(metal ion transmembrane transporter activity);GO:0015085(calcium ion transmembrane transporter activity);GO:0006812(cation transport);GO:0072511(divalent inorganic cation transport);GO:0015368(calcium:cation antiporter activity);GO:0098655(cation transmembrane transport);GO:…	NA
ahy-miR156b-5p_1ss10GT	XM_016076805.2	gi|356525802|ref|XP_003531512.1;PREDICTED: cysteine-rich and transmembrane domain-containing protein A-like isoform X2 [Glycine max];gi|734390535|gb|KHN26823.1;hypothetical protein glysoja_011415 [Glycine soja]	8	GUGCUGCUCUAUGUUGCUGUUGU&UUGACAG-AAUAUAGAG-AGCAC	NA	NA
ahy-miR156b-5p_1ss10GT	XM_016080624.2	gi|823159862|ref|XP_012479768.1;PREDICTED: uncharacterized protein LOC105794926 [Gossypium raimondii]	6	AAUCUCUCUGUGUUCUGUCAC&UUGACAGAAUAUAGAGAGCAC	NA	NA
ahy-miR156b-5p_1ss10GT	XM_016095052.2	gi|502077326|ref|XP_004485620.1;PREDICTED: U3 small nucleolar RNA-associated protein 18 homolog [Cicer arietinum]	11	UGGCUCUCUGUAUUCCCCUGUUGA&UUGACA---GAAUAUAGAGAGCAC	GO:0046483(heterocycle metabolic process);GO:0042274(ribosomal small subunit biogenesis);GO:0006396(RNA processing);GO:0034388(Pwp2p-containing subcomplex of 90S preribosome);GO:0044422(organelle part);GO:0034660(ncRNA metabolic process);GO:0006139(nucleobase-containing compound metabolic process);GO:0043231(intracellular membrane-bounded organelle);GO:0006725(cellular aromatic compound metabolic…	ko03008(Ribosome biogenesis in eukaryotes)
ahy-miR156b-5p_1ss10GT	XM_016095671.2	gi|920714318|gb|KOM54406.1;hypothetical protein LR48_Vigan10g029800 [Vigna angularis]	10	GUGCUCUCGGCGAUUCCGUCAC&UUGACAGAAU-AUAGAGAGCAC	GO:0044238(primary metabolic process);GO:0006807(nitrogen compound metabolic process);GO:0044249(cellular biosynthetic process);GO:0022625(cytosolic large ribosomal subunit);GO:0044271(cellular nitrogen compound biosynthetic process);GO:0044422(organelle part);GO:1990904(ribonucleoprotein complex);GO:0030529(intracellular ribonucleoprotein complex);GO:0044267(cellular protein metabolic process);G…	ko03010(Ribosome)
ahy-miR156b-5p_1ss10GT	XM_016101710.2	gi|356524636|ref|XP_003530934.1;PREDICTED: 26S proteasome non-ATPase regulatory subunit 1 homolog A [Glycine max]	12	GUGCUCUCUAUGCGCUUGGUCUU&UUGAC--AGAAUAUAGAGAGCAC	GO:0031597(cytosolic proteasome complex);GO:0044444(cytoplasmic part);GO:0070011(peptidase activity, acting on L-amino acid peptides);GO:0044464(cell part);GO:0051171(regulation of nitrogen compound metabolic process);GO:0009894(regulation of catabolic process);GO:0032991(macromolecular complex);GO:0030234(enzyme regulator activity);GO:0006511(ubiquitin-dependent protein catabolic process);GO:003…	ko03050(Proteasome)
ahy-miR156b-5p_1ss10GT	XM_016102920.2	gi|502134233|ref|XP_004502045.1;PREDICTED: uncharacterized protein LOC101505890 isoform X1 [Cicer arietinum]	13	GUGCUCUCAAGAGUAUUCUGUAUG&UUGACAGAAUAU---AGAGAGCAC	GO:0016021(integral component of membrane);GO:0044425(membrane part);GO:0016020(membrane);GO:0031224(intrinsic component of membrane)	NA
ahy-miR156b-5p_1ss10GT	XM_016104430.2	gi|356530296|ref|XP_003533718.1;PREDICTED: pentatricopeptide repeat-containing protein At2g18940, chloroplastic-like [Glycine max]	8	AUGCUCUCUAUGUUUGUUCGA&UUGACAGAAUAUAGAGAGCAC	NA	NA
ahy-miR156b-5p_1ss10GT	XM_016106756.2	gi|922362328|ref|XP_003605033.2;galactose oxidase [Medicago truncatula]	9	GUGCUCUCUAAUUUCUGAUCCU&UUGA-CAGAAUAUAGAGAGCAC	NA	NA
ahy-miR156b-5p_1ss10GT	XM_016109996.2	gi|593789248|ref|XP_007157663.1;hypothetical protein PHAVU_002G088200g [Phaseolus vulgaris]	6.5	CUGUCUCUCUGUGUUCUGCUCAG&UUGA-CAGAAUAUAGAGAG-CAC	NA	NA
ahy-miR156b-5p_1ss10GT	XM_016112735.2	gi|356571121|ref|XP_003553729.1;PREDICTED: cyclin-P3-1 [Glycine max]	7	GUGCUCUGCUUAUUCUGUCCU&UUGACAGAAUAUAGAGAGCAC	GO:0045859(regulation of protein kinase activity);GO:0019901(protein kinase binding);GO:0019899(enzyme binding);GO:0060255(regulation of macromolecule metabolic process);GO:0031323(regulation of cellular metabolic process);GO:0051246(regulation of protein metabolic process);GO:0019900(kinase binding);GO:0005488(binding);GO:0051338(regulation of transferase activity);GO:0065009(regulation of molec…	ko00630(Glyoxylate and dicarboxylate metabolism);ko01200(Carbon metabolism);ko01100(Metabolic pathways);ko01210(2-Oxocarboxylic acid metabolism);ko01230(Biosynthesis of amino acids);ko00020(Citrate cycle (TCA cycle));ko01110(Biosynthesis of secondary metabolites)
ahy-miR156b-5p_1ss10GT	XM_016113141.2	gi|743830119|ref|XP_011023696.1;PREDICTED: 60S ribosomal protein L22-2-like [Populus euphratica]	8.5	GUGCUCUUGGUGAUUCUGUCAC&UUGACAGAAU-AUAGAGAGCAC	GO:0044391(ribosomal subunit);GO:0043226(organelle);GO:0044464(cell part);GO:0043603(cellular amide metabolic process);GO:0008152(metabolic process);GO:0009059(macromolecule biosynthetic process);GO:0005829(cytosol);GO:0005737(cytoplasm);GO:0044271(cellular nitrogen compound biosynthetic process);GO:0005198(structural molecule activity);GO:0006518(peptide metabolic process);GO:0034641(cellular ni…	ko03010(Ribosome)
ahy-miR156b-5p_1ss10GT	XM_016113319.2	gi|951011862|ref|XP_014509896.1;PREDICTED: dual specificity protein kinase zakA-like [Vigna radiata var. radiata]	27	GUGCUCUCUAUGAUUCUCAAGAUGUUGCUGUCAA&UUGACAG-AAU------------AUAGAGAGCAC	GO:0043167(ion binding);GO:0050794(regulation of cellular process);GO:0045859(regulation of protein kinase activity);GO:0043549(regulation of kinase activity);GO:0005488(binding);GO:0005524(ATP binding);GO:0033674(positive regulation of kinase activity);GO:0048518(positive regulation of biological process);GO:0045860(positive regulation of protein kinase activity);GO:0097367(carbohydrate derivati…	ko04075(Plant hormone signal transduction);ko04016(MAPK signaling pathway - plant)
ahy-miR156b-5p_1ss10GT	XM_016115802.2	gi|947057497|gb|KRH06903.1;hypothetical protein GLYMA_16G053300 [Glycine max]	11	GUGCUCUCUGCG-UUUGUCUG&UUGACAGAAUAUAGAGAGCAC	GO:0016746(transferase activity, transferring acyl groups);GO:0016747(transferase activity, transferring acyl groups other than amino-acyl groups);GO:0016740(transferase activity);GO:0003824(catalytic activity)	ko00073(Cutin, suberine and wax biosynthesis)
ahy-miR156b-5p_1ss10GT	XM_016115819.2	gi|658306055|gb|AID59221.1;squamosa promoter-binding-like protein [Arachis hypogaea]	2	GUGCUCUCUAUCUUCUGUCAA&UUGACAGAAUAUAGAGAGCAC	GO:0044424(intracellular part);GO:0005622(intracellular);GO:0003677(DNA binding);GO:0044464(cell part);GO:0003676(nucleic acid binding);GO:0043226(organelle);GO:0005488(binding);GO:0043167(ion binding);GO:0046872(metal ion binding);GO:0043229(intracellular organelle);GO:0005623(cell);GO:0043231(intracellular membrane-bounded organelle);GO:0097159(organic cyclic compound binding);GO:0043227(membra…	ko04075(Plant hormone signal transduction)
ahy-miR156b-5p_1ss10GT	XM_021124883.1	gi|502130232|ref|XP_004500577.1;PREDICTED: uncharacterized protein LOC101500861 [Cicer arietinum];gi|357491997|ref|XP_003616287.1;replication factor-A carboxy-terminal domain protein [Medicago truncatula];gi|922329455|ref|XP_003628568.2;replication factor-A carboxy-terminal domain protein [Medicago truncatula];gi|922335432|ref|XP_013445706.1;animal RPA1 domain protein [Medicago truncatula]	7	GUGUUUUCUAUAUUGUGUUUG&UUGACAGAAUAUAGAGAGCAC	NA	ko03430(Mismatch repair);ko03420(Nucleotide excision repair);ko03030(DNA replication);ko03440(Homologous recombination)
ahy-miR156b-5p_1ss10GT	XM_021125123.1	gi|658306055|gb|AID59221.1;squamosa promoter-binding-like protein [Arachis hypogaea]	2	GUGCUCUCUAUCUUCUGUCAA&UUGACAGAAUAUAGAGAGCAC	GO:0044424(intracellular part);GO:0005622(intracellular);GO:0003677(DNA binding);GO:0044464(cell part);GO:0003676(nucleic acid binding);GO:0043226(organelle);GO:0005488(binding);GO:0043167(ion binding);GO:0046872(metal ion binding);GO:0043229(intracellular organelle);GO:0005623(cell);GO:0043231(intracellular membrane-bounded organelle);GO:0097159(organic cyclic compound binding);GO:0043227(membra…	ko04075(Plant hormone signal transduction)
ahy-miR156b-5p_1ss10GT	XM_021128901.1	gi|502077326|ref|XP_004485620.1;PREDICTED: U3 small nucleolar RNA-associated protein 18 homolog [Cicer arietinum]	11	UGGCUCUCUGUAUUCCCCUGUUGA&UUGACA---GAAUAUAGAGAGCAC	GO:0044260(cellular macromolecule metabolic process);GO:0042254(ribosome biogenesis);GO:0044422(organelle part);GO:0016070(RNA metabolic process);GO:0016072(rRNA metabolic process);GO:0090304(nucleic acid metabolic process);GO:0010467(gene expression);GO:0071704(organic substance metabolic process);GO:0044452(nucleolar part);GO:0043228(non-membrane-bounded organelle);GO:0043233(organelle lumen);G…	ko03008(Ribosome biogenesis in eukaryotes)
ahy-miR156b-5p_1ss10GT	BGI_novel_T008281	gi|920682451|gb|KOM29223.1;hypothetical protein LR48_Vigan641s001100 [Vigna angularis];gi|593689280|ref|XP_007145259.1;hypothetical protein PHAVU_007G223800g [Phaseolus vulgaris]	10	GUGCUGUCUAUAUCCCUUCUGUCAU&UUGACAGA----AUAUAGAGAGCAC	GO:0003824(catalytic activity);GO:0070085(glycosylation);GO:0047259(glucomannan 4-beta-mannosyltransferase activity);GO:0097502(mannosylation);GO:0019187(beta-1,4-mannosyltransferase activity);GO:0008152(metabolic process);GO:0000030(mannosyltransferase activity);GO:0044425(membrane part);GO:0016021(integral component of membrane);GO:0016740(transferase activity);GO:0031224(intrinsic component of…	NA
ahy-miR156b-5p_1ss10GT	BGI_novel_T008596	gi|658306055|gb|AID59221.1;squamosa promoter-binding-like protein [Arachis hypogaea]	2	GUGCUCUCUAUCUUCUGUCAA&UUGACAGAAUAUAGAGAGCAC	GO:0044424(intracellular part);GO:0005622(intracellular);GO:0003677(DNA binding);GO:0044464(cell part);GO:0003676(nucleic acid binding);GO:0043226(organelle);GO:0005488(binding);GO:0043167(ion binding);GO:0046872(metal ion binding);GO:0043229(intracellular organelle);GO:0005623(cell);GO:0043231(intracellular membrane-bounded organelle);GO:0097159(organic cyclic compound binding);GO:0043227(membra…	ko04075(Plant hormone signal transduction)
ahy-miR156b-5p_1ss10GT	BGI_novel_T009903	gi|571492689|ref|XP_006592313.1;PREDICTED: MAR-binding filament-like protein 1 isoform X2 [Glycine max];gi|734416936|gb|KHN38653.1;MAR-binding filament-like protein 1-1 [Glycine soja]	8	GUGCUCUCUAUGCAUCUGCUCAG&UUGA-CAGA-AUAUAGAGAGCAC	NA	NA
ahy-miR156b-5p_1ss10GT	XM_016076164.2	gi|571474253|ref|XP_003530824.2;PREDICTED: vacuolar cation/proton exchanger 5-like isoform X1 [Glycine max];gi|951040233|ref|XP_014517618.1;PREDICTED: vacuolar cation/proton exchanger 5-like isoform X3 [Vigna radiata var. radiata];gi|951040223|ref|XP_014517616.1;PREDICTED: vacuolar cation/proton exchanger 5-like isoform X1 [Vigna radiata var. radiata]	6	GUGGUCUCUAUAUCUCUG-CGA&UUGACAGA-AUAUAGAGAGCAC	GO:0005215(transporter activity);GO:0015299(solute:proton antiporter activity);GO:0006816(calcium ion transport);GO:0046873(metal ion transmembrane transporter activity);GO:0015085(calcium ion transmembrane transporter activity);GO:0006812(cation transport);GO:0072511(divalent inorganic cation transport);GO:0015368(calcium:cation antiporter activity);GO:0098655(cation transmembrane transport);GO:…	NA
ahy-miR156b-5p_1ss10GT	XM_016077918.2	gi|922364901|ref|XP_013454701.1;plastidic ATP/ADP-transporter-like protein [Medicago truncatula]	8	AAGCUCUCUUUUAUUCUGUUAU&UUGACAGAAUA-UAGAGAGCAC	GO:0005215(transporter activity);GO:0015865(purine nucleotide transport);GO:0005346(purine ribonucleotide transmembrane transporter activity);GO:0015748(organophosphate ester transport);GO:0031224(intrinsic component of membrane);GO:0015932(nucleobase-containing compound transmembrane transporter activity);GO:0000295(adenine nucleotide transmembrane transporter activity);GO:0071705(nitrogen compo…	NA
ahy-miR156b-5p_1ss10GT	XM_016096608.2	gi|965603695|dbj|BAT90872.1;hypothetical protein VIGAN_06216300 [Vigna angularis var. angularis]	8	GUGCUCUCU-UAUUCGUGUUCU&UUGACA-GAAUAUAGAGAGCAC	NA	NA
ahy-miR156b-5p_1ss10GT	XM_016098387.2	gi|922363228|ref|XP_003607707.2;formin-like 2 domain protein [Medicago truncatula]	6.5	CUGCUCUUUAUGUUCUGUGGU&UUGACAGAAUAUAGAGAGCAC	GO:0016020(membrane);GO:0044425(membrane part);GO:0016021(integral component of membrane);GO:0031224(intrinsic component of membrane)	NA
ahy-miR156b-5p_1ss10GT	XM_016103470.2	gi|922400096|ref|XP_013467185.1;disease resistance-responsive, dirigent domain protein [Medicago truncatula];gi|959092394|ref|NP_001304514.1;dirigent protein 16-like [Glycine max]	4.5	UUGCUCU-UGUAUUUUGUCAG&UUGACAGAAUAUAGAGAGCAC	NA	ko00970(Aminoacyl-tRNA biosynthesis)
ahy-miR156b-5p_1ss21CT	XM_016077280.2	gi|828301321|ref|XP_004494954.2;PREDICTED: bifunctional phosphatase IMPL2, chloroplastic [Cicer arietinum]	9.5	AUGCUCUUUUGUCUUCUGGCUU&UUGACAGAAGAUAGA-GAGCAU	GO:0052832(inositol monophosphate 3-phosphatase activity);GO:0052833(inositol monophosphate 4-phosphatase activity);GO:0044255(cellular lipid metabolic process);GO:0044238(primary metabolic process);GO:0042578(phosphoric ester hydrolase activity);GO:0030258(lipid modification);GO:0006796(phosphate-containing compound metabolic process);GO:0016311(dephosphorylation);GO:0052745(inositol phosphate p…	ko00562(Inositol phosphate metabolism);ko01100(Metabolic pathways);ko01230(Biosynthesis of amino acids);ko01110(Biosynthesis of secondary metabolites);ko04070(Phosphatidylinositol signaling system);ko00340(Histidine metabolism);ko00053(Ascorbate and aldarate metabolism)
ahy-miR156b-5p_1ss21CT	XM_016079434.2	gi|223550704|gb|EEF52190.1;multidrug resistance pump, putative [Ricinus communis]	5.5	AUGCUGCUUCUUCUUCUGUUAA&UUGACAGAAGAUAGAG-AGCAU	GO:0042221(response to chemical);GO:0015297(antiporter activity);GO:0050896(response to stimulus);GO:0022804(active transmembrane transporter activity);GO:0016020(membrane);GO:0055085(transmembrane transport);GO:0022857(transmembrane transporter activity);GO:0042493(response to drug);GO:0015238(drug transmembrane transporter activity);GO:0044425(membrane part);GO:0005215(transporter activity);GO:…	NA
ahy-miR156b-5p_1ss21CT	XM_016081185.2	gi|593705212|ref|XP_007152970.1;hypothetical protein PHAVU_004G175600g [Phaseolus vulgaris]	5	AUGUUCUUCUUCUUCUGUUAA&UUGACAGAAGAUAGAGAGCAU	GO:0016531(copper chaperone activity);GO:0031975(envelope);GO:0031970(organelle envelope lumen);GO:0031974(membrane-enclosed lumen);GO:0051234(establishment of localization);GO:0043229(intracellular organelle);GO:0005739(mitochondrion);GO:0030001(metal ion transport);GO:0044464(cell part);GO:0044422(organelle part);GO:0006810(transport);GO:0043231(intracellular membrane-bounded organelle);GO:0044…	ko00190(Oxidative phosphorylation);ko01100(Metabolic pathways)
ahy-miR156b-5p_1ss21CT	XM_016096633.2	gi|356545443|ref|XP_003541152.1;PREDICTED: probable hydroxyacylglutathione hydrolase 2, chloroplastic isoform X2 [Glycine max]	12	AUGCUCUCUAAGCCUUCUUCUG-CAA&UUGACAGAAGA-----UAGAGAGCAU	GO:0009987(cellular process);GO:0009056(catabolic process);GO:0016787(hydrolase activity);GO:0061727(methylglyoxal catabolic process to lactate);GO:0006081(cellular aldehyde metabolic process);GO:0043436(oxoacid metabolic process);GO:0042182(ketone catabolic process);GO:0006089(lactate metabolic process);GO:0042180(cellular ketone metabolic process);GO:1901615(organic hydroxy compound metabolic p…	ko00620(Pyruvate metabolism)
ahy-miR156b-5p_1ss21CT	XM_016102181.2	gi|356525397|ref|XP_003531311.1;PREDICTED: cationic amino acid transporter 1-like [Glycine max]	5	UUGCUCUCUGUUUUCUGUUAC&UUGACAGAAGAUAGAGAGCAU	GO:0006865(amino acid transport);GO:0008324(cation transmembrane transporter activity);GO:0005310(dicarboxylic acid transmembrane transporter activity);GO:0016021(integral component of membrane);GO:0015291(secondary active transmembrane transporter activity);GO:0015813(L-glutamate transport);GO:0015807(L-amino acid transport);GO:0043092(L-amino acid import);GO:0005215(transporter activity);GO:000…	NA
ahy-miR156b-5p_1ss21CT	XM_016107532.2	gi|734355000|gb|KHN13885.1;hypothetical protein glysoja_016169 [Glycine soja];gi|571550017|ref|XP_006603030.1;PREDICTED: uncharacterized protein LOC102660840 isoform X1 [Glycine max];gi|947052087|gb|KRH01616.1;hypothetical protein GLYMA_18G288300 [Glycine max]	12.5	AUGCUGCUCUGUCAGAGCUCUGUCAG&UUGACAGA----AGAUAGAG-AGCAU	NA	NA
ahy-miR156b-5p_1ss21CT	XM_016109565.2	gi|947126725|gb|KRH74579.1;hypothetical protein GLYMA_01G029500 [Glycine max];gi|356502299|ref|XP_003519957.1;PREDICTED: E3 ubiquitin-protein ligase BOI-like [Glycine max]	8	AUGCUGCACCCUCUAUCUUGCUGUCAC&UUGACAG-AAGAUAGAG-----AGCAU	GO:1901564(organonitrogen compound metabolic process);GO:0044237(cellular metabolic process);GO:0044260(cellular macromolecule metabolic process);GO:1901363(heterocyclic compound binding);GO:0044238(primary metabolic process);GO:0008152(metabolic process);GO:0009987(cellular process);GO:0005622(intracellular);GO:0044424(intracellular part);GO:0043167(ion binding);GO:0005623(cell);GO:0043169(catio…	NA
ahy-miR156b-5p_1ss21CT	XM_016109566.2	gi|947126725|gb|KRH74579.1;hypothetical protein GLYMA_01G029500 [Glycine max];gi|356502299|ref|XP_003519957.1;PREDICTED: E3 ubiquitin-protein ligase BOI-like [Glycine max]	8	AUGCUGCACCCUCUAUCUUGCUGUCAC&UUGACAG-AAGAUAGAG-----AGCAU	GO:1901564(organonitrogen compound metabolic process);GO:0044237(cellular metabolic process);GO:0044260(cellular macromolecule metabolic process);GO:1901363(heterocyclic compound binding);GO:0044238(primary metabolic process);GO:0008152(metabolic process);GO:0009987(cellular process);GO:0005622(intracellular);GO:0044424(intracellular part);GO:0043167(ion binding);GO:0005623(cell);GO:0043169(catio…	NA
ahy-miR156b-5p_1ss21CT	XM_016113869.2	gi|658306047|gb|AID59217.1;squamosa promoter-binding-like protein [Arachis hypogaea]	2.5	GUGCUCUCUCUCUUCUGUCAA&UUGACAGAAGAUAGAGAGCAU	NA	ko04075(Plant hormone signal transduction)
ahy-miR156b-5p_1ss21CT	XM_021139532.1	gi|356528278|ref|XP_003532731.1;PREDICTED: pentatricopeptide repeat-containing protein At5g27270 [Glycine max];gi|922337229|ref|XP_013446604.1;PPR containing plant-like protein [Medicago truncatula]	9.5	AUGCUUUCUGUUG-CUGUCUA&UUGACAGAAGAUAGAGAGCAU	GO:0006725(cellular aromatic compound metabolic process);GO:0043227(membrane-bounded organelle);GO:0097159(organic cyclic compound binding);GO:0043412(macromolecule modification);GO:0016070(RNA metabolic process);GO:0005622(intracellular);GO:1901363(heterocyclic compound binding);GO:0004519(endonuclease activity);GO:0044260(cellular macromolecule metabolic process);GO:0090304(nucleic acid metabol…	NA
ahy-miR156b-5p_1ss21CT	XM_021142474.1	gi|947126725|gb|KRH74579.1;hypothetical protein GLYMA_01G029500 [Glycine max];gi|356502299|ref|XP_003519957.1;PREDICTED: E3 ubiquitin-protein ligase BOI-like [Glycine max]	8	AUGCUGCACCCUCUAUCUUGCUGUCAC&UUGACAG-AAGAUAGAG-----AGCAU	GO:1901564(organonitrogen compound metabolic process);GO:0044237(cellular metabolic process);GO:0044260(cellular macromolecule metabolic process);GO:1901363(heterocyclic compound binding);GO:0044238(primary metabolic process);GO:0008152(metabolic process);GO:0009987(cellular process);GO:0005622(intracellular);GO:0044424(intracellular part);GO:0043167(ion binding);GO:0005623(cell);GO:0043169(catio…	NA
ahy-miR156b-5p_1ss21CT	BGI_novel_T006630	gi|947126725|gb|KRH74579.1;hypothetical protein GLYMA_01G029500 [Glycine max];gi|356502299|ref|XP_003519957.1;PREDICTED: E3 ubiquitin-protein ligase BOI-like [Glycine max]	8	AUGCUGCACCCUCUAUCUUGCUGUCAC&UUGACAG-AAGAUAGAG-----AGCAU	GO:1901564(organonitrogen compound metabolic process);GO:0044237(cellular metabolic process);GO:0044260(cellular macromolecule metabolic process);GO:1901363(heterocyclic compound binding);GO:0044238(primary metabolic process);GO:0008152(metabolic process);GO:0009987(cellular process);GO:0005622(intracellular);GO:0044424(intracellular part);GO:0043167(ion binding);GO:0005623(cell);GO:0043169(catio…	NA
ahy-miR156b-5p_1ss21CT	XM_016078398.2	gi|920710321|gb|KOM51570.1;hypothetical protein LR48_Vigan09g022900 [Vigna angularis];gi|950980583|ref|XP_014502098.1;PREDICTED: lysophospholipid acyltransferase LPEAT1-like isoform X2 [Vigna radiata var. radiata]	11.5	AUGCUCUUUAUCUUCGGCUUC&UUGACAGAAGAUAGAGAGCAU	GO:0044425(membrane part);GO:0016020(membrane);GO:0016021(integral component of membrane);GO:0016746(transferase activity, transferring acyl groups);GO:0031224(intrinsic component of membrane);GO:0008152(metabolic process);GO:0003824(catalytic activity);GO:0016740(transferase activity)	ko00564(Glycerophospholipid metabolism);ko00565(Ether lipid metabolism);ko01100(Metabolic pathways)
ahy-miR160-3p	BGI_novel_T003749	gi|922338225|ref|XP_013447102.1;monodehydroascorbate reductase [Medicago truncatula];gi|951012667|ref|XP_014510110.1;PREDICTED: monodehydroascorbate reductase, chloroplastic [Vigna radiata var. radiata]	7	CCUGCUGUGAGUCCCUUUGAGC&GCAUGAAGGGAGUCAC-GCAGG	GO:0009532(plastid stroma);GO:0032559(adenyl ribonucleotide binding);GO:0032553(ribonucleotide binding);GO:0005622(intracellular);GO:0043229(intracellular organelle);GO:0050660(flavin adenine dinucleotide binding);GO:0043231(intracellular membrane-bounded organelle);GO:0044444(cytoplasmic part);GO:0048037(cofactor binding);GO:0005737(cytoplasm);GO:0008152(metabolic process);GO:0031967(organelle e…	ko01100(Metabolic pathways);ko00053(Ascorbate and aldarate metabolism)
ahy-miR160-3p	XM_016099967.2	gi|922338225|ref|XP_013447102.1;monodehydroascorbate reductase [Medicago truncatula];gi|951012667|ref|XP_014510110.1;PREDICTED: monodehydroascorbate reductase, chloroplastic [Vigna radiata var. radiata]	7	CCUGCUGUGAGUCCCUUUGAGC&GCAUGAAGGGAGUCAC-GCAGG	GO:0009532(plastid stroma);GO:0032559(adenyl ribonucleotide binding);GO:0032553(ribonucleotide binding);GO:0005622(intracellular);GO:0043229(intracellular organelle);GO:0050660(flavin adenine dinucleotide binding);GO:0043231(intracellular membrane-bounded organelle);GO:0044444(cytoplasmic part);GO:0048037(cofactor binding);GO:0005737(cytoplasm);GO:0008152(metabolic process);GO:0031967(organelle e…	ko01100(Metabolic pathways);ko00053(Ascorbate and aldarate metabolism)
ahy-miR160-3p	XM_016110764.2	gi|593785041|ref|XP_007155561.1;hypothetical protein PHAVU_003G212300g [Phaseolus vulgaris];gi|922371029|ref|XP_013457676.1;F-box protein PP2-A13 [Medicago truncatula]	7.5	GCUGCGUGGCUCUGAUCAUGG&GCAUGAAGGGAGUCACGCAGG	NA	ko00514(Other types of O-glycan biosynthesis)
ahy-miR160-3p	XM_016111083.2	gi|356497597|ref|XP_003517646.1;PREDICTED: uncharacterized protein LOC100803214 isoform X1 [Glycine max]	8	GCUGCGGCGACUCCC-UCGCUGC&GCA-UGAAGGGAGUC-ACGCAGG	NA	NA
ahy-miR160-3p	XM_021131738.1	gi|950990528|ref|XP_014504332.1;PREDICTED: uncharacterized protein LOC106764580 [Vigna radiata var. radiata]	5	CUGGCGUGGCUCUCUUGAUGC&GCAUGAAGGGAGUCACGCAGG	NA	NA
ahy-miR160-3p	XM_016102013.2	gi|110836647|emb|CAI99394.1;polygalacturonase inhibiting protein precursor [Glycine max]	17.5	CUUGUGUGGGCCACCCCUCCCUCCAUGC&GCAUGAAGGGAG-------UCACGCAGG	NA	ko00500(Starch and sucrose metabolism);ko01110(Biosynthesis of secondary metabolites);ko01100(Metabolic pathways);ko04626(Plant-pathogen interaction);ko00460(Cyanoamino acid metabolism);ko04016(MAPK signaling pathway - plant);ko00940(Phenylpropanoid biosynthesis)
ahy-miR160-3p	XM_016107889.2	gi|593785149|ref|XP_007155615.1;hypothetical protein PHAVU_003G216800g [Phaseolus vulgaris]	5.5	UCUGUGUGACUCCUGUUAUGC&GCAUGAAGGGAGUCACGCAGG	GO:0016020(membrane);GO:0031224(intrinsic component of membrane);GO:0044425(membrane part);GO:0016021(integral component of membrane)	NA
ahy-miR160-3p	XM_016116128.2	gi|502170387|ref|XP_004514819.1;PREDICTED: phosphoglucan phosphatase LSF1, chloroplastic isoform X1 [Cicer arietinum];gi|356573817|ref|XP_003555052.1;PREDICTED: phosphoglucan phosphatase LSF1, chloroplastic-like [Glycine max]	19	CCUGCACUGGAUGACAGAUGUUUCCCUUCAUGC&GCAUGAAGGGA-------GUCA-C----GCAGG	GO:0016787(hydrolase activity);GO:1901564(organonitrogen compound metabolic process);GO:0004721(phosphoprotein phosphatase activity);GO:0044267(cellular protein metabolic process);GO:0005975(carbohydrate metabolic process);GO:0044264(cellular polysaccharide metabolic process);GO:0009057(macromolecule catabolic process);GO:0044237(cellular metabolic process);GO:0071704(organic substance metabolic …	ko01100(Metabolic pathways);ko00520(Amino sugar and nucleotide sugar metabolism);ko00051(Fructose and mannose metabolism)
ahy-miR160-5p	BGI_novel_T008769	gi|590579636|ref|XP_007013842.1;Cellulose synthase 1 [Theobroma cacao];gi|356507742|ref|XP_003522623.1;PREDICTED: cellulose synthase A catalytic subunit 1 [UDP-forming] [Glycine max]	5.5	UGGUAUUCAGGGA-CCAGUGUA&UGC-CUGGCUCCCUGAAUGCCA	GO:1901576(organic substance biosynthetic process);GO:0005975(carbohydrate metabolic process);GO:0008270(zinc ion binding);GO:0044260(cellular macromolecule metabolic process);GO:0005886(plasma membrane);GO:0044425(membrane part);GO:1903047(mitotic cell cycle process);GO:0000278(mitotic cell cycle);GO:0009059(macromolecule biosynthetic process);GO:0005488(binding);GO:0071555(cell wall organizatio…	NA
ahy-miR160-5p	BGI_novel_T009874	gi|828299475|ref|XP_012569198.1;PREDICTED: BTB/POZ domain-containing protein At3g09030 [Cicer arietinum]	8	GGGCGCCAAUCGGGGAACCAGGCA&UGCCUGGCUCCCUGA---AUGCCA	GO:0044085(cellular component biogenesis);GO:0016043(cellular component organization);GO:0051259(protein oligomerization);GO:0065003(macromolecular complex assembly);GO:0071822(protein complex subunit organization);GO:0051260(protein homooligomerization);GO:0022607(cellular component assembly);GO:0071840(cellular component organization or biogenesis);GO:0009987(cellular process);GO:0070271(protei…	NA
ahy-miR160-5p	BGI_novel_T010250	gi|356516043|ref|XP_003526706.1;PREDICTED: glutamate synthase [NADH], amyloplastic-like isoform X1 [Glycine max];gi|920698175|gb|KOM41400.1;hypothetical protein LR48_Vigan04g159800 [Vigna angularis];gi|950990906|ref|XP_014504410.1;PREDICTED: glutamate synthase [NADH], amyloplastic isoform X1 [Vigna radiata var. radiata];gi|950990917|ref|XP_014504413.1;PREDICTED: glutamate synthase [NADH], amylopl…	8.5	UGGCGGUCGCAGGG-GCCAGGGA&UGCCUGGCUCCCUG--AAUGCCA	GO:0008152(metabolic process);GO:1901576(organic substance biosynthetic process);GO:0016053(organic acid biosynthetic process);GO:0003824(catalytic activity);GO:0044238(primary metabolic process);GO:0043650(dicarboxylic acid biosynthetic process);GO:0006807(nitrogen compound metabolic process);GO:0005488(binding);GO:0055114(oxidation-reduction process);GO:0097159(organic cyclic compound binding);…	ko00250(Alanine, aspartate and glutamate metabolism);ko01100(Metabolic pathways);ko01230(Biosynthesis of amino acids);ko00910(Nitrogen metabolism);ko01110(Biosynthesis of secondary metabolites)
ahy-miR160-5p	BGI_novel_T011103	gi|950978735|ref|XP_014501728.1;PREDICTED: uncharacterized protein LOC106762368 [Vigna radiata var. radiata];gi|593270000|ref|XP_007136991.1;hypothetical protein PHAVU_009G091100g [Phaseolus vulgaris]	8.5	UGGCGUUGAGGGAUGUUCGGGCU&UGCCUGG-C-UCCCUGAAUGCCA	NA	ko04144(Endocytosis)
ahy-miR160-5p	BGI_novel_T013323	gi|802634737|ref|XP_012078139.1;PREDICTED: auxin response factor 17 [Jatropha curcas]	1	UGGCAUGCAGGGAGCCAGGCA&UGCCUGGCUCCCUGAAUGCCA	GO:0050896(response to stimulus);GO:2001141(regulation of RNA biosynthetic process);GO:0097159(organic cyclic compound binding);GO:0007154(cell communication);GO:0005488(binding);GO:0009058(biosynthetic process);GO:0065007(biological regulation);GO:0031323(regulation of cellular metabolic process);GO:0010467(gene expression);GO:0009733(response to auxin);GO:0044260(cellular macromolecule metaboli…	ko04075(Plant hormone signal transduction)
ahy-miR160-5p	XM_016079942.2	gi|823224905|ref|XP_012445236.1;PREDICTED: solute carrier family 25 member 44-like [Gossypium raimondii]	4	UGGCAGUUCAGGGAGUCAGUGCA&UGC-CUGGCUCCCUGAA-UGCCA	GO:0031224(intrinsic component of membrane);GO:0016020(membrane);GO:0051234(establishment of localization);GO:0044425(membrane part);GO:0006810(transport);GO:0055085(transmembrane transport);GO:0016021(integral component of membrane);GO:0051179(localization)	NA
ahy-miR160-5p	XM_016080165.2	gi|356558399|ref|XP_003547494.1;PREDICTED: uncharacterized protein LOC100818129 [Glycine max];gi|734397468|gb|KHN30223.1;Nuclear factor related to kappa-B-binding protein [Glycine soja]	6.5	UGGGGUUCAGGGAG-CAGGAA&UGCCUGGCUCCCUGAAUGCCA	GO:0044427(chromosomal part);GO:0044446(intracellular organelle part);GO:0005623(cell);GO:0044424(intracellular part);GO:0033202(DNA helicase complex);GO:0043228(non-membrane-bounded organelle);GO:0043231(intracellular membrane-bounded organelle);GO:0000790(nuclear chromatin);GO:0043233(organelle lumen);GO:0070603(SWI/SNF superfamily-type complex);GO:0043232(intracellular non-membrane-bounded org…	NA
ahy-miR160-5p	XM_016083351.2	gi|947095517|gb|KRH44102.1;hypothetical protein GLYMA_08G190100 [Glycine max]	9	UGGCACCGACAAGGGAGCUAGCGCA&UGC-CUGGCUCCCU---GAAUGCCA	GO:0016462(pyrophosphatase activity);GO:0017076(purine nucleotide binding);GO:0043170(macromolecule metabolic process);GO:0019538(protein metabolic process);GO:0016818(hydrolase activity, acting on acid anhydrides, in phosphorus-containing anhydrides);GO:0009987(cellular process);GO:0032553(ribonucleotide binding);GO:0009058(biosynthetic process);GO:0006412(translation);GO:0036094(small molecule …	ko03013(RNA transport)
ahy-miR160-5p	XM_016086102.2	gi|28194659|gb|AAO33591.1|AF479309_1//putative early light induced protein [Arachis hypogaea]	5	UGGCAUUCAGUGGGCCA-GCA&UGCCUGGCUCCCUGAAUGCCA	GO:0016021(integral component of membrane);GO:0031224(intrinsic component of membrane);GO:0044425(membrane part);GO:0016020(membrane)	NA
ahy-miR160-5p	XM_016087953.2	gi|357445865|ref|XP_003593210.1;transmembrane protein, putative [Medicago truncatula]	9	CGGCGUUUGAGAGGGCGCUCAGGCA&UGCCUG-GCUCCCU---GAAUGCCA	NA	NA
ahy-miR160-5p	XM_016095216.2	gi|703085816|ref|XP_010092841.1;hypothetical protein L484_022436 [Morus notabilis];gi|922334056|ref|XP_013445019.1;hypothetical protein MTR_8g036115 [Medicago truncatula]	14	CGUGCAUUCAGGGCACGAGCCGGGGC&UGCCUGGCU----CCCUGAAUGC-CA	NA	NA
ahy-miR160-5p	XM_016096907.2	gi|225449052|ref|XP_002274407.1;PREDICTED: 60S ribosomal protein L12 [Vitis vinifera]	8	AGGCACUCAAGGAGCCGGAGCG&UGC-CUGGCUCCCUGAAUGCCA	GO:0009987(cellular process);GO:0044391(ribosomal subunit);GO:1990904(ribonucleoprotein complex);GO:0043226(organelle);GO:0044238(primary metabolic process);GO:1901566(organonitrogen compound biosynthetic process);GO:0010467(gene expression);GO:0043170(macromolecule metabolic process);GO:0044445(cytosolic part);GO:0022626(cytosolic ribosome);GO:0005840(ribosome);GO:0006412(translation);GO:0003735…	ko03010(Ribosome)
ahy-miR160-5p	XM_016098977.2	gi|357449857|ref|XP_003595205.1;DNA repair and recombination protein [Medicago truncatula]	11.5	AGGUGAAGAGACUUUAGGGAGCCAGGUU&UGCCUGGCUCCCUGAA-------UGCCA	GO:0017111(nucleoside-triphosphatase activity);GO:0006259(DNA metabolic process);GO:0008094(DNA-dependent ATPase activity);GO:0016818(hydrolase activity, acting on acid anhydrides, in phosphorus-containing anhydrides);GO:0003677(DNA binding);GO:0044085(cellular component biogenesis);GO:0071840(cellular component organization or biogenesis);GO:0003697(single-stranded DNA binding);GO:0000725(recomb…	ko03440(Homologous recombination)
ahy-miR160-5p	XM_021129848.1	gi|950978735|ref|XP_014501728.1;PREDICTED: uncharacterized protein LOC106762368 [Vigna radiata var. radiata];gi|593270000|ref|XP_007136991.1;hypothetical protein PHAVU_009G091100g [Phaseolus vulgaris]	8.5	UGGCGUUGAGGGAUGUUCGGGCU&UGCCUGG-C-UCCCUGAAUGCCA	NA	ko04144(Endocytosis)
ahy-miR160-5p	XM_021138043.1	gi|225461628|ref|XP_002285377.1;PREDICTED: UBP1-associated protein 2C [Vitis vinifera]	13.5	UGGCGUUCAGGGUCAUGGUCAUGGCC&UGCC-UGGCU----CCCUGAAUGCCA	GO:0005488(binding);GO:0043229(intracellular organelle);GO:0044424(intracellular part);GO:1901363(heterocyclic compound binding);GO:0009987(cellular process);GO:0036094(small molecule binding);GO:0003676(nucleic acid binding);GO:0043231(intracellular membrane-bounded organelle);GO:1901265(nucleoside phosphate binding);GO:0043226(organelle);GO:0043227(membrane-bounded organelle);GO:0005622(intrace…	ko03040(Spliceosome)
ahy-miR160-5p	BGI_novel_T002277	gi|593689394|ref|XP_007145316.1;hypothetical protein PHAVU_007G228800g [Phaseolus vulgaris]	5.5	UGGCGCAAAGGGUAGCCAGGCA&UGCCUGGCU-CCCUGAAUGCCA	GO:0044271(cellular nitrogen compound biosynthetic process);GO:0046983(protein dimerization activity);GO:1902494(catalytic complex);GO:0097159(organic cyclic compound binding);GO:1901564(organonitrogen compound metabolic process);GO:0000428(DNA-directed RNA polymerase complex);GO:0044422(organelle part);GO:0090575(RNA polymerase II transcription factor complex);GO:0044446(intracellular organelle …	ko03022(Basal transcription factors)
ahy-miR160-5p	BGI_novel_T006200	gi|571487809|ref|XP_006590758.1;PREDICTED: serine/threonine-protein kinase/endoribonuclease IRE1a-like isoform X2 [Glycine max];gi|922359248|ref|XP_013453594.1;endoribonuclease/kinase IRE1-like protein [Medicago truncatula];gi|357484205|ref|XP_003612390.1;endoribonuclease/kinase IRE1-like protein [Medicago truncatula]	6.5	GGGAGUUCAGGGUGGCAGGCA&UGCCUGGCUCCCUGAAUGCCA	GO:0006139(nucleobase-containing compound metabolic process);GO:0006725(cellular aromatic compound metabolic process);GO:1901564(organonitrogen compound metabolic process);GO:1901360(organic cyclic compound metabolic process);GO:0016773(phosphotransferase activity, alcohol group as acceptor);GO:0036094(small molecule binding);GO:0016788(hydrolase activity, acting on ester bonds);GO:0097159(organi…	ko04141(Protein processing in endoplasmic reticulum)
ahy-miR160-5p	BGI_novel_T006203	gi|571487809|ref|XP_006590758.1;PREDICTED: serine/threonine-protein kinase/endoribonuclease IRE1a-like isoform X2 [Glycine max];gi|922359248|ref|XP_013453594.1;endoribonuclease/kinase IRE1-like protein [Medicago truncatula];gi|357484205|ref|XP_003612390.1;endoribonuclease/kinase IRE1-like protein [Medicago truncatula]	6.5	GGGAGUUCAGGGUGGCAGGCA&UGCCUGGCUCCCUGAAUGCCA	GO:0006139(nucleobase-containing compound metabolic process);GO:0006725(cellular aromatic compound metabolic process);GO:1901564(organonitrogen compound metabolic process);GO:1901360(organic cyclic compound metabolic process);GO:0016773(phosphotransferase activity, alcohol group as acceptor);GO:0036094(small molecule binding);GO:0016788(hydrolase activity, acting on ester bonds);GO:0097159(organi…	ko04141(Protein processing in endoplasmic reticulum)
ahy-miR160-5p	BGI_novel_T010248	gi|356516043|ref|XP_003526706.1;PREDICTED: glutamate synthase [NADH], amyloplastic-like isoform X1 [Glycine max];gi|920698175|gb|KOM41400.1;hypothetical protein LR48_Vigan04g159800 [Vigna angularis];gi|950990906|ref|XP_014504410.1;PREDICTED: glutamate synthase [NADH], amyloplastic isoform X1 [Vigna radiata var. radiata];gi|950990917|ref|XP_014504413.1;PREDICTED: glutamate synthase [NADH], amylopl…	8.5	UGGCGGUCGCAGGG-GCCAGGGA&UGCCUGGCUCCCUG--AAUGCCA	GO:0008152(metabolic process);GO:1901576(organic substance biosynthetic process);GO:0016053(organic acid biosynthetic process);GO:0003824(catalytic activity);GO:0044238(primary metabolic process);GO:0043650(dicarboxylic acid biosynthetic process);GO:0006807(nitrogen compound metabolic process);GO:0005488(binding);GO:0055114(oxidation-reduction process);GO:0097159(organic cyclic compound binding);…	ko00250(Alanine, aspartate and glutamate metabolism);ko01100(Metabolic pathways);ko01230(Biosynthesis of amino acids);ko00910(Nitrogen metabolism);ko01110(Biosynthesis of secondary metabolites)
ahy-miR160-5p	BGI_novel_T010249	gi|356516043|ref|XP_003526706.1;PREDICTED: glutamate synthase [NADH], amyloplastic-like isoform X1 [Glycine max];gi|920698175|gb|KOM41400.1;hypothetical protein LR48_Vigan04g159800 [Vigna angularis];gi|950990906|ref|XP_014504410.1;PREDICTED: glutamate synthase [NADH], amyloplastic isoform X1 [Vigna radiata var. radiata];gi|950990917|ref|XP_014504413.1;PREDICTED: glutamate synthase [NADH], amylopl…	8.5	UGGCGGUCGCAGGG-GCCAGGGA&UGCCUGGCUCCCUG--AAUGCCA	GO:0008152(metabolic process);GO:1901576(organic substance biosynthetic process);GO:0016053(organic acid biosynthetic process);GO:0003824(catalytic activity);GO:0044238(primary metabolic process);GO:0043650(dicarboxylic acid biosynthetic process);GO:0006807(nitrogen compound metabolic process);GO:0005488(binding);GO:0055114(oxidation-reduction process);GO:0097159(organic cyclic compound binding);…	ko00250(Alanine, aspartate and glutamate metabolism);ko01100(Metabolic pathways);ko01230(Biosynthesis of amino acids);ko00910(Nitrogen metabolism);ko01110(Biosynthesis of secondary metabolites)
ahy-miR160-5p	XM_016077939.2	gi|828299475|ref|XP_012569198.1;PREDICTED: BTB/POZ domain-containing protein At3g09030 [Cicer arietinum]	8	GGGCGCCAAUCGGGGAACCAGGCA&UGCCUGGCUCCCUGA---AUGCCA	GO:0051259(protein oligomerization);GO:0071822(protein complex subunit organization);GO:0006461(protein complex assembly);GO:0022607(cellular component assembly);GO:0070271(protein complex biogenesis);GO:0051260(protein homooligomerization);GO:0043933(macromolecular complex subunit organization);GO:0044085(cellular component biogenesis);GO:0065003(macromolecular complex assembly);GO:0016043(cellu…	NA
ahy-miR160-5p	XM_016079132.2	gi|502175085|ref|XP_004515666.1;PREDICTED: uncharacterized protein LOC101488965 isoform X1 [Cicer arietinum];gi|502175093|ref|XP_004515667.1;PREDICTED: uncharacterized protein LOC101488965 isoform X2 [Cicer arietinum]	4.5	UGGCAUG-GGGGAGACAGGCA&UGCCUGGCUCCCUGAAUGCCA	GO:0043167(ion binding);GO:0043169(cation binding);GO:0046872(metal ion binding);GO:0005488(binding)	NA
ahy-miR160-5p	XM_016084464.2	gi|571483190|ref|XP_006589153.1;PREDICTED: golgin IMH1-like [Glycine max]	8	UGGCGUUCGCGGAGACGCAGGCC&UGCCUG-G-CUCCCUGAAUGCCA	NA	ko00970(Aminoacyl-tRNA biosynthesis)
ahy-miR160-5p	XM_016085228.2	gi|502153108|ref|XP_004509219.1;PREDICTED: oxygen-evolving enhancer protein 1, chloroplastic [Cicer arietinum]	5	UGGCA-UCAGGGAAGCCAGACA&UGCCUGGCU-CCCUGAAUGCCA	GO:0031323(regulation of cellular metabolic process);GO:0065007(biological regulation);GO:0046872(metal ion binding);GO:0043234(protein complex);GO:0016020(membrane);GO:0019222(regulation of metabolic process);GO:0044464(cell part);GO:0005509(calcium ion binding);GO:0005488(binding);GO:0042651(thylakoid membrane);GO:0032991(macromolecular complex);GO:0042549(photosystem II stabilization);GO:19024…	ko00195(Photosynthesis);ko01100(Metabolic pathways)
ahy-miR160-5p	XM_016093568.2	gi|502129606|ref|XP_004500364.1;PREDICTED: transcription factor RF2b-like [Cicer arietinum]	7	UGGCGC-CGGAGGAGCUAGGCC&UGCCUGGCUCC-CUGAAUGCCA	GO:0043231(intracellular membrane-bounded organelle);GO:0031323(regulation of cellular metabolic process);GO:0010468(regulation of gene expression);GO:0051171(regulation of nitrogen compound metabolic process);GO:0005623(cell);GO:0051252(regulation of RNA metabolic process);GO:0019219(regulation of nucleobase-containing compound metabolic process);GO:0044424(intracellular part);GO:0097159(organic…	ko04016(MAPK signaling pathway - plant)
ahy-miR160-5p	XM_016094519.2	gi|828299475|ref|XP_012569198.1;PREDICTED: BTB/POZ domain-containing protein At3g09030 [Cicer arietinum]	8	GGGCGCCAAUCGGGGAACCAGGCA&UGCCUGGCUCCCUGA---AUGCCA	GO:0009987(cellular process);GO:0006461(protein complex assembly);GO:0071822(protein complex subunit organization);GO:0051259(protein oligomerization);GO:0043933(macromolecular complex subunit organization);GO:0071840(cellular component organization or biogenesis);GO:0051260(protein homooligomerization);GO:0022607(cellular component assembly);GO:0044085(cellular component biogenesis);GO:0065003(m…	NA
ahy-miR160-5p	XM_016096662.2	gi|571492184|ref|XP_006592155.1;PREDICTED: ATPase family AAA domain-containing protein At1g05910-like isoform X2 [Glycine max];gi|356545489|ref|XP_003541174.1;PREDICTED: ATPase family AAA domain-containing protein At1g05910-like isoform X1 [Glycine max]	9.5	CUGCGUCCAGGGAGCCGGAAGGCA&UGCCU---GGCUCCCUGAAUGCCA	GO:0043227(membrane-bounded organelle);GO:0048519(negative regulation of biological process);GO:0032555(purine ribonucleotide binding);GO:0010557(positive regulation of macromolecule biosynthetic process);GO:0005622(intracellular);GO:1903508(positive regulation of nucleic acid-templated transcription);GO:0051171(regulation of nitrogen compound metabolic process);GO:0019222(regulation of metabolic…	ko04141(Protein processing in endoplasmic reticulum)
ahy-miR160-5p	XM_016103137.2	gi|502079111|ref|XP_004486158.1;PREDICTED: uncharacterized protein LOC101500992 [Cicer arietinum]	6.5	CGGUUUUCGAGGGAGUCGGGCG&UGCCUGGCUCCCU-GAAUGCCA	NA	NA
ahy-miR160-5p	XM_016103386.2	gi|502135150|ref|XP_004502237.1;PREDICTED: UDP-glucuronate 4-epimerase 6 [Cicer arietinum]	8	UGGCGUUUAGGGAUUUCGGGUA&UGCCUGG-CUCCCUGAAUGCCA	GO:0031224(intrinsic component of membrane);GO:0044238(primary metabolic process);GO:0003824(catalytic activity);GO:0008152(metabolic process);GO:0050662(coenzyme binding);GO:0071704(organic substance metabolic process);GO:0097708(intracellular vesicle);GO:0005488(binding);GO:0044424(intracellular part);GO:0016853(isomerase activity);GO:0043227(membrane-bounded organelle);GO:0043226(organelle);GO…	ko00520(Amino sugar and nucleotide sugar metabolism);ko01100(Metabolic pathways)
ahy-miR160-5p	XM_016116424.1	gi|590579636|ref|XP_007013842.1;Cellulose synthase 1 [Theobroma cacao];gi|356507742|ref|XP_003522623.1;PREDICTED: cellulose synthase A catalytic subunit 1 [UDP-forming] [Glycine max]	5.5	UGGUAUUCAGGGA-CCAGUGUA&UGC-CUGGCUCCCUGAAUGCCA	GO:1901576(organic substance biosynthetic process);GO:0005975(carbohydrate metabolic process);GO:0008270(zinc ion binding);GO:0044260(cellular macromolecule metabolic process);GO:0005886(plasma membrane);GO:0044425(membrane part);GO:1903047(mitotic cell cycle process);GO:0000278(mitotic cell cycle);GO:0009059(macromolecule biosynthetic process);GO:0005488(binding);GO:0071555(cell wall organizatio…	NA
ahy-miR160-5p	XM_021128669.1	gi|356516043|ref|XP_003526706.1;PREDICTED: glutamate synthase [NADH], amyloplastic-like isoform X1 [Glycine max];gi|920698175|gb|KOM41400.1;hypothetical protein LR48_Vigan04g159800 [Vigna angularis];gi|950990906|ref|XP_014504410.1;PREDICTED: glutamate synthase [NADH], amyloplastic isoform X1 [Vigna radiata var. radiata];gi|950990917|ref|XP_014504413.1;PREDICTED: glutamate synthase [NADH], amylopl…	8.5	UGGCGGUCGCAGGG-GCCAGGGA&UGCCUGGCUCCCUG--AAUGCCA	GO:0008152(metabolic process);GO:1901576(organic substance biosynthetic process);GO:0016053(organic acid biosynthetic process);GO:0003824(catalytic activity);GO:0044238(primary metabolic process);GO:0043650(dicarboxylic acid biosynthetic process);GO:0006807(nitrogen compound metabolic process);GO:0005488(binding);GO:0055114(oxidation-reduction process);GO:0097159(organic cyclic compound binding);…	ko00250(Alanine, aspartate and glutamate metabolism);ko01100(Metabolic pathways);ko01230(Biosynthesis of amino acids);ko00910(Nitrogen metabolism);ko01110(Biosynthesis of secondary metabolites)
ahy-miR160-5p	XM_021128796.1	gi|502175085|ref|XP_004515666.1;PREDICTED: uncharacterized protein LOC101488965 isoform X1 [Cicer arietinum];gi|502175093|ref|XP_004515667.1;PREDICTED: uncharacterized protein LOC101488965 isoform X2 [Cicer arietinum]	4.5	UGGCAUG-GGGGAGACAGGCA&UGCCUGGCUCCCUGAAUGCCA	GO:0043167(ion binding);GO:0043169(cation binding);GO:0046872(metal ion binding);GO:0005488(binding)	NA
ahy-miR160-5p	XM_021137531.1	gi|502144405|ref|XP_004505684.1;PREDICTED: uncharacterized protein LOC101490411 [Cicer arietinum]	7	AAGCAGUUUUCA-GGAGCCAGGCA&UGCCUGGCUCCCUGAA---UGCCA	NA	NA
ahy-miR160-5p	XM_021138044.1	gi|225461628|ref|XP_002285377.1;PREDICTED: UBP1-associated protein 2C [Vitis vinifera]	13.5	UGGCGUUCAGGGUCAUGGUCAUGGCC&UGCC-UGGCU----CCCUGAAUGCCA	GO:0005488(binding);GO:0043229(intracellular organelle);GO:0044424(intracellular part);GO:1901363(heterocyclic compound binding);GO:0009987(cellular process);GO:0036094(small molecule binding);GO:0003676(nucleic acid binding);GO:0043231(intracellular membrane-bounded organelle);GO:1901265(nucleoside phosphate binding);GO:0043226(organelle);GO:0043227(membrane-bounded organelle);GO:0005622(intrace…	ko03040(Spliceosome)
ahy-miR160-5p	XM_021138918.1	gi|571466841|ref|XP_006583773.1;PREDICTED: dynamin-related protein 3A-like [Glycine max]	7	AGGCAUUCAGUGUGCCAGGUU&UGCCUGGCUCCCUGAAUGCCA	GO:0005488(binding);GO:0003824(catalytic activity);GO:0003924(GTPase activity);GO:0097159(organic cyclic compound binding);GO:0016787(hydrolase activity);GO:0016462(pyrophosphatase activity);GO:0035639(purine ribonucleoside triphosphate binding);GO:0001882(nucleoside binding);GO:0017111(nucleoside-triphosphatase activity);GO:0005525(GTP binding);GO:1901265(nucleoside phosphate binding);GO:0036094…	NA
ahy-miR167-3p_L-1	BGI_novel_T000704	gi|356562759|ref|XP_003549636.1;PREDICTED: nucleobase-ascorbate transporter 6 isoform X1 [Glycine max]	10.5	GGUGAAGCCUUUGCCAUGAUGAUG&GAUCAU-GUGGCA---GUUUCACC	GO:0016021(integral component of membrane);GO:0051179(localization);GO:0006810(transport);GO:0031224(intrinsic component of membrane);GO:0044425(membrane part);GO:0016020(membrane);GO:0051234(establishment of localization);GO:0055085(transmembrane transport);GO:0005215(transporter activity)	NA
ahy-miR167-3p_L-1	BGI_novel_T001049	gi|955332305|ref|XP_014633698.1;PREDICTED: calmodulin-binding transcription activator 5-like isoform X1 [Glycine max];gi|947102269|gb|KRH50761.1;hypothetical protein GLYMA_07G242000 [Glycine max];gi|571467667|ref|XP_006584006.1;PREDICTED: calmodulin-binding transcription activator 5-like isoform X2 [Glycine max]	7.5	GGUGGACAAACUGCUGC-UGAUC&GAUCAUGUGGCAGU---UUCACC	GO:0043565(sequence-specific DNA binding);GO:0019219(regulation of nucleobase-containing compound metabolic process);GO:0043231(intracellular membrane-bounded organelle);GO:0043229(intracellular organelle);GO:0000981(RNA polymerase II transcription factor activity, sequence-specific DNA binding);GO:0009893(positive regulation of metabolic process);GO:1901363(heterocyclic compound binding);GO:0051…	ko00564(Glycerophospholipid metabolism);ko00561(Glycerolipid metabolism);ko00592(alpha-Linolenic acid metabolism);ko00591(Linoleic acid metabolism);ko00100(Steroid biosynthesis);ko01110(Biosynthesis of secondary metabolites);ko00565(Ether lipid metabolism);ko00590(Arachidonic acid metabolism);ko01100(Metabolic pathways)
ahy-miR167-3p_L-1	BGI_novel_T001256	gi|593782821|ref|XP_007154451.1;hypothetical protein PHAVU_003G120300g [Phaseolus vulgaris];gi|965660579|dbj|BAT76998.1;hypothetical protein VIGAN_01507700 [Vigna angularis var. angularis]	5.5	GAUGAAAUUGCCGCA-GAUC&GAUCAUGUGGCAGUUUCACC	GO:0035639(purine ribonucleoside triphosphate binding);GO:0032553(ribonucleotide binding);GO:0071704(organic substance metabolic process);GO:0044272(sulfur compound biosynthetic process);GO:0004478(methionine adenosyltransferase activity);GO:0006730(one-carbon metabolic process);GO:0044249(cellular biosynthetic process);GO:0003824(catalytic activity);GO:0046872(metal ion binding);GO:0097367(carbo…	ko00270(Cysteine and methionine metabolism);ko01100(Metabolic pathways);ko01110(Biosynthesis of secondary metabolites);ko01230(Biosynthesis of amino acids)
ahy-miR167-3p_L-1	BGI_novel_T001257	gi|593782821|ref|XP_007154451.1;hypothetical protein PHAVU_003G120300g [Phaseolus vulgaris];gi|965660579|dbj|BAT76998.1;hypothetical protein VIGAN_01507700 [Vigna angularis var. angularis]	5.5	GAUGAAAUUGCCGCA-GAUC&GAUCAUGUGGCAGUUUCACC	GO:0035639(purine ribonucleoside triphosphate binding);GO:0032553(ribonucleotide binding);GO:0071704(organic substance metabolic process);GO:0044272(sulfur compound biosynthetic process);GO:0004478(methionine adenosyltransferase activity);GO:0006730(one-carbon metabolic process);GO:0044249(cellular biosynthetic process);GO:0003824(catalytic activity);GO:0046872(metal ion binding);GO:0097367(carbo…	ko00270(Cysteine and methionine metabolism);ko01100(Metabolic pathways);ko01110(Biosynthesis of secondary metabolites);ko01230(Biosynthesis of amino acids)
ahy-miR167-3p_L-1	BGI_novel_T003862	gi|449438313|ref|XP_004136933.1;PREDICTED: magnesium transporter MRS2-3 isoform X1 [Cucumis sativus]	7.5	CGUGAGAGGGCCAUCGUGAUC&GAUCAUG-UGGCAGUUUCACC	GO:0016020(membrane);GO:0031224(intrinsic component of membrane);GO:0044425(membrane part);GO:0016021(integral component of membrane)	NA
ahy-miR167-3p_L-1	BGI_novel_T004447	gi|356531188|ref|XP_003534160.1;PREDICTED: kinesin-like protein NACK1 [Glycine max]	10	GGUGAAACUGCUCUUAAUGAUA&GAUCAU--GUGGCAGUUUCACC	GO:0008017(microtubule binding);GO:0015631(tubulin binding);GO:0043167(ion binding);GO:1901265(nucleoside phosphate binding);GO:0005488(binding);GO:0009987(cellular process);GO:0003777(microtubule motor activity);GO:0032502(developmental process);GO:1902410(mitotic cytokinetic process);GO:0009653(anatomical structure morphogenesis);GO:0007018(microtubule-based movement);GO:0043234(protein complex…	NA
ahy-miR167-3p_L-1	BGI_novel_T004463	gi|965657898|dbj|BAT74317.1;hypothetical protein VIGAN_01196400 [Vigna angularis var. angularis]	8	GGUGGCUGCUGCUGC-UGGUC&GAUCAUGUGGCAGU-UUCACC	GO:0015031(protein transport);GO:0051641(cellular localization);GO:0006614(SRP-dependent cotranslational protein targeting to membrane);GO:0034613(cellular protein localization);GO:0046907(intracellular transport);GO:0044424(intracellular part);GO:0045047(protein targeting to ER);GO:0071702(organic substance transport);GO:0005622(intracellular);GO:0072599(establishment of protein localization to …	ko03060(Protein export)
ahy-miR167-3p_L-1	BGI_novel_T005848	gi|734373844|gb|KHN20477.1;Protein ARABIDILLO 1 [Glycine soja];gi|950961577|ref|XP_014497910.1;PREDICTED: protein ARABIDILLO 1 [Vigna radiata var. radiata]	10.5	GGUGAUUGCUGCCCGGCAUGAGU&GAUCAUGU--GGCAGU-UUCACC	GO:0043229(intracellular organelle);GO:0043231(intracellular membrane-bounded organelle);GO:0044424(intracellular part);GO:0043226(organelle);GO:0005622(intracellular);GO:0043227(membrane-bounded organelle);GO:0005634(nucleus);GO:0005623(cell);GO:0005737(cytoplasm);GO:0044464(cell part)	NA
ahy-miR167-3p_L-1	BGI_novel_T006068	gi|502100311|ref|XP_004491686.1;PREDICTED: callose synthase 3-like [Cicer arietinum];gi|922340860|ref|XP_013447423.1;glucan synthase-like protein [Medicago truncatula]	6	GGUGGGACUGG-ACAUGAUG&GAUCAUGUGGCAGUUUCACC	GO:0008152(metabolic process);GO:0016740(transferase activity);GO:0006073(cellular glucan metabolic process);GO:0016757(transferase activity, transferring glycosyl groups);GO:0044042(glucan metabolic process);GO:0044425(membrane part);GO:0033692(cellular polysaccharide biosynthetic process);GO:0005623(cell);GO:0035251(UDP-glucosyltransferase activity);GO:0009987(cellular process);GO:0016758(trans…	NA
ahy-miR167-3p_L-1	BGI_novel_T006401	gi|734388457|gb|KHN25723.1;Protein IQ-DOMAIN 14 [Glycine soja];gi|356495659|ref|XP_003516692.1;PREDICTED: protein IQ-DOMAIN 14-like isoform X1 [Glycine max]	10.5	GGUGAAGCUGCAAGCGUUGGUG&GAUCA-UGU-GGCAGUUUCACC	NA	ko03008(Ribosome biogenesis in eukaryotes);ko03015(mRNA surveillance pathway)
ahy-miR167-3p_L-1	BGI_novel_T007754	gi|356571172|ref|XP_003553753.1;PREDICTED: mediator-associated protein 1 [Glycine max]	15	GGUGGUGCUGCCAUGGGAGGUGGUC&GAUCAU-----GUGGCAGUUUCACC	GO:0016772(transferase activity, transferring phosphorus-containing groups);GO:0010468(regulation of gene expression);GO:0016740(transferase activity);GO:0080090(regulation of primary metabolic process);GO:1903506(regulation of nucleic acid-templated transcription);GO:0010556(regulation of macromolecule biosynthetic process);GO:0051171(regulation of nitrogen compound metabolic process);GO:2001141…	NA
ahy-miR167-3p_L-1	BGI_novel_T008837	gi|356508471|ref|XP_003522980.1;PREDICTED: RNA-binding protein 38 [Glycine max]	7.5	AGUGGAACUGCUACUUGAGU&GAUCAUGUGGCAGUUUCACC	GO:1901363(heterocyclic compound binding);GO:1901265(nucleoside phosphate binding);GO:0036094(small molecule binding);GO:0005488(binding);GO:0003676(nucleic acid binding);GO:0000166(nucleotide binding);GO:0003723(RNA binding);GO:0097159(organic cyclic compound binding)	ko03040(Spliceosome)
ahy-miR167-3p_L-1	BGI_novel_T009053	gi|502122244|ref|XP_004497650.1;PREDICTED: glucan endo-1,3-beta-glucosidase 12-like [Cicer arietinum]	9.5	GGUGAAUGCUGCCACGUCAGC&GAUCAUGUGGCAGU-UUCACC	GO:0016798(hydrolase activity, acting on glycosyl bonds);GO:0008152(metabolic process);GO:0005975(carbohydrate metabolic process);GO:0016787(hydrolase activity);GO:0003824(catalytic activity);GO:0004553(hydrolase activity, hydrolyzing O-glycosyl compounds);GO:0071704(organic substance metabolic process);GO:0044238(primary metabolic process)	ko00500(Starch and sucrose metabolism)
ahy-miR167-3p_L-1	BGI_novel_T009223	gi|502144710|ref|XP_004505724.1;PREDICTED: phosphoribosylaminoimidazole-succinocarboxamide synthase, chloroplastic [Cicer arietinum];gi|920705076|gb|KOM48301.1;hypothetical protein LR48_Vigan07g200500 [Vigna angularis]	7.5	GGUGGAACUGCCGU-UG-UC&GAUCAUGUGGCAGUUUCACC	GO:0005737(cytoplasm);GO:0043229(intracellular organelle);GO:0005622(intracellular);GO:0044424(intracellular part);GO:0009507(chloroplast);GO:0005623(cell);GO:0044444(cytoplasmic part);GO:0044464(cell part);GO:0043226(organelle);GO:0009536(plastid);GO:0043227(membrane-bounded organelle);GO:0043231(intracellular membrane-bounded organelle)	ko01110(Biosynthesis of secondary metabolites);ko01100(Metabolic pathways);ko00230(Purine metabolism)
ahy-miR167-3p_L-1	XM_016077285.2	gi|342365835|gb|AEL30368.1;hypothetical protein 205D04_8 [Arachis hypogaea]	7.5	GGUG-GACUGGCACAUGUGC&GAUCAUGUGGCAGUUUCACC	NA	ko00350(Tyrosine metabolism);ko00360(Phenylalanine metabolism)
ahy-miR167-3p_L-1	XM_016077327.2	gi|356552864|ref|XP_003544782.1;PREDICTED: random slug protein 5-like [Glycine max]	5.5	CGUGAAACUGCC-CAUGUAUU&GAU-CAUGUGGCAGUUUCACC	NA	ko00970(Aminoacyl-tRNA biosynthesis);ko03015(mRNA surveillance pathway);ko01100(Metabolic pathways)
ahy-miR167-3p_L-1	XM_016077361.2	gi|951058932|ref|XP_014522293.1;PREDICTED: phospho-2-dehydro-3-deoxyheptonate aldolase 1, chloroplastic-like [Vigna radiata var. radiata]	11.5	GGUGAAGCUGCC-CAGCUAC&GAUCAUGUGGCAGUUUCACC	GO:0006807(nitrogen compound metabolic process);GO:0044238(primary metabolic process);GO:0016740(transferase activity);GO:0009073(aromatic amino acid family biosynthetic process);GO:0071704(organic substance metabolic process);GO:0044249(cellular biosynthetic process);GO:0009072(aromatic amino acid family metabolic process);GO:0043436(oxoacid metabolic process);GO:0009058(biosynthetic process);GO…	ko01110(Biosynthesis of secondary metabolites);ko01100(Metabolic pathways);ko00400(Phenylalanine, tyrosine and tryptophan biosynthesis);ko01230(Biosynthesis of amino acids)
ahy-miR167-3p_L-1	XM_016081841.2	gi|922376508|ref|XP_003603523.2;cryptochrome, DASH family protein [Medicago truncatula]	9	GGUGAAACUGCGGCGUUGAGC&GAUCA-UGUGGCAGUUUCACC	GO:0016830(carbon-carbon lyase activity);GO:0008152(metabolic process);GO:0006281(DNA repair);GO:0044238(primary metabolic process);GO:0044237(cellular metabolic process);GO:0006725(cellular aromatic compound metabolic process);GO:0050896(response to stimulus);GO:0009987(cellular process);GO:0034641(cellular nitrogen compound metabolic process);GO:0046483(heterocycle metabolic process);GO:0006974…	NA
ahy-miR167-3p_L-1	XM_016085154.2	gi|920692351|gb|KOM35576.1;hypothetical protein LR48_Vigan02g172600 [Vigna angularis]	7	GGUG-AACUGCCAGCAUGGCU&GAUCAUG-UGGCAGUUUCACC	GO:0008233(peptidase activity);GO:0004190(aspartic-type endopeptidase activity);GO:1901564(organonitrogen compound metabolic process);GO:0044238(primary metabolic process);GO:0043170(macromolecule metabolic process);GO:0004175(endopeptidase activity);GO:0070011(peptidase activity, acting on L-amino acid peptides);GO:0003824(catalytic activity);GO:0006807(nitrogen compound metabolic process);GO:00…	ko03010(Ribosome)
ahy-miR167-3p_L-1	XM_016085194.2	gi|922395667|ref|XP_003589961.2;NADH-ubiquinone oxidoreductase 51 kDa subunit [Medicago truncatula]	8	UUGGGAACUGCCGCUGUGAUU&GAUCAU-GUGGCAGUUUCACC	GO:0016655(oxidoreductase activity, acting on NAD(P)H, quinone or similar compound as acceptor);GO:0051287(NAD binding);GO:0016491(oxidoreductase activity);GO:0009060(aerobic respiration);GO:0005488(binding);GO:1901363(heterocyclic compound binding);GO:0008152(metabolic process);GO:0003954(NADH dehydrogenase activity);GO:0032553(ribonucleotide binding);GO:0000166(nucleotide binding);GO:0045333(ce…	ko00190(Oxidative phosphorylation);ko01100(Metabolic pathways)
ahy-miR167-3p_L-1	XM_016085700.2	gi|571532777|ref|XP_006600310.1;PREDICTED: uncharacterized protein LOC100811239 [Glycine max]	5	AGUGAAACUGUC-CAUGAUA&GAUCAUGUGGCAGUUUCACC	NA	NA
ahy-miR167-3p_L-1	XM_016085707.2	gi|571532777|ref|XP_006600310.1;PREDICTED: uncharacterized protein LOC100811239 [Glycine max]	5	AGUGAAACUGUC-CAUGAUA&GAUCAUGUGGCAGUUUCACC	NA	NA
ahy-miR167-3p_L-1	XM_016085978.2	gi|920692815|gb|KOM36040.1;hypothetical protein LR48_Vigan02g219000 [Vigna angularis]	6.5	GG-GAAGCUGCUGAGAUGAUC&GAUCAUGU-GGCAGUUUCACC	GO:0044260(cellular macromolecule metabolic process);GO:0043168(anion binding);GO:0004004(ATP-dependent RNA helicase activity);GO:0003723(RNA binding);GO:0036094(small molecule binding);GO:0042623(ATPase activity, coupled);GO:0016818(hydrolase activity, acting on acid anhydrides, in phosphorus-containing anhydrides);GO:0008026(ATP-dependent helicase activity);GO:0017076(purine nucleotide binding)…	ko01110(Biosynthesis of secondary metabolites)
ahy-miR167-3p_L-1	XM_016086008.2	gi|356575875|ref|XP_003556062.1;PREDICTED: protein NETWORKED 1A-like [Glycine max]	18.5	GGCUGAAGCUGCUACAUUCUAUUUUGAUC&GAUCA--------UGUGGCAGUUUCA-CC	GO:0003779(actin binding);GO:0008092(cytoskeletal protein binding);GO:0005515(protein binding);GO:0005488(binding)	NA
ahy-miR167-3p_L-1	XM_016086346.2	gi|356536156|ref|XP_003536605.1;PREDICTED: D-3-phosphoglycerate dehydrogenase 3, chloroplastic-like [Glycine max]	8.5	GGUGGAUCAGCCAGGCAUGAUC&GAUCAUGU--GGCAGUUUCACC	GO:1901576(organic substance biosynthetic process);GO:0016053(organic acid biosynthetic process);GO:0009987(cellular process);GO:0008652(cellular amino acid biosynthetic process);GO:0016614(oxidoreductase activity, acting on CH-OH group of donors);GO:1901607(alpha-amino acid biosynthetic process);GO:0006520(cellular amino acid metabolic process);GO:0009069(serine family amino acid metabolic proce…	ko01230(Biosynthesis of amino acids);ko01100(Metabolic pathways);ko01200(Carbon metabolism);ko00260(Glycine, serine and threonine metabolism)
ahy-miR167-3p_L-1	XM_016086830.2	gi|502121590|ref|XP_004497380.1;PREDICTED: callose synthase 3 [Cicer arietinum]	13	GGUGAAGCUGCCAACCUAAGAUU&GAUC---AUGUGGCAGUUUCACC	GO:0071944(cell periphery);GO:0016051(carbohydrate biosynthetic process);GO:0043170(macromolecule metabolic process);GO:0071704(organic substance metabolic process);GO:0016758(transferase activity, transferring hexosyl groups);GO:0008194(UDP-glycosyltransferase activity);GO:0044260(cellular macromolecule metabolic process);GO:0000271(polysaccharide biosynthetic process);GO:0044425(membrane part);…	NA
ahy-miR167-3p_L-1	XM_016089256.2	gi|590674532|ref|XP_007039195.1;SER/ARG-rich protein 34A [Theobroma cacao];gi|571460376|ref|XP_006581683.1;PREDICTED: serine/arginine-rich splicing factor SR34A-like isoform X3 [Glycine max]	7	GGUGGAGCUUGCC-CAUGGUG&GAUCAUGUGGCA-GUUUCACC	GO:0043233(organelle lumen);GO:0034641(cellular nitrogen compound metabolic process);GO:0006412(translation);GO:0036094(small molecule binding);GO:1901576(organic substance biosynthetic process);GO:0032991(macromolecular complex);GO:0044428(nuclear part);GO:0044446(intracellular organelle part);GO:0043226(organelle);GO:0005622(intracellular);GO:0031981(nuclear lumen);GO:0005737(cytoplasm);GO:0009…	ko03040(Spliceosome)
ahy-miR167-3p_L-1	XM_016089388.2	gi|593783915|ref|XP_007154998.1;hypothetical protein PHAVU_003G164300g [Phaseolus vulgaris]	10	UUUGAGGCUGCCGCUUCUGAUC&GAUCA--UGUGGCAGUUUCACC	GO:0008152(metabolic process);GO:0008168(methyltransferase activity);GO:0016741(transferase activity, transferring one-carbon groups);GO:0016740(transferase activity);GO:0003824(catalytic activity);GO:0032259(methylation)	NA
ahy-miR167-3p_L-1	XM_016089533.2	gi|593782821|ref|XP_007154451.1;hypothetical protein PHAVU_003G120300g [Phaseolus vulgaris];gi|965660579|dbj|BAT76998.1;hypothetical protein VIGAN_01507700 [Vigna angularis var. angularis]	5.5	GAUGAAAUUGCCGCA-GAUC&GAUCAUGUGGCAGUUUCACC	GO:0035639(purine ribonucleoside triphosphate binding);GO:0032553(ribonucleotide binding);GO:0071704(organic substance metabolic process);GO:0044272(sulfur compound biosynthetic process);GO:0004478(methionine adenosyltransferase activity);GO:0006730(one-carbon metabolic process);GO:0044249(cellular biosynthetic process);GO:0003824(catalytic activity);GO:0046872(metal ion binding);GO:0097367(carbo…	ko00270(Cysteine and methionine metabolism);ko01100(Metabolic pathways);ko01110(Biosynthesis of secondary metabolites);ko01230(Biosynthesis of amino acids)
ahy-miR167-3p_L-1	XM_016089561.1	gi|356516237|ref|XP_003526802.1;PREDICTED: aminoacyl tRNA synthase complex-interacting multifunctional protein 1-like [Glycine max]	7.5	GGAAAAGCUGCCACAUGUGU&GAUCAUGUGGCAGUUUCACC	GO:0009506(plasmodesma);GO:0005488(binding);GO:0044267(cellular protein metabolic process);GO:0043038(amino acid activation);GO:0005911(cell-cell junction);GO:0003723(RNA binding);GO:0006520(cellular amino acid metabolic process);GO:0006399(tRNA metabolic process);GO:0006412(translation);GO:0006807(nitrogen compound metabolic process);GO:0044271(cellular nitrogen compound biosynthetic process);GO…	NA
ahy-miR167-3p_L-1	XM_016089594.2	gi|920697446|gb|KOM40671.1;hypothetical protein LR48_Vigan04g086900 [Vigna angularis]	8.5	GGUGAAGCUGCUACUAGAGA&GAUCAUGUGGCAGUUUCACC	GO:0098660(inorganic ion transmembrane transport);GO:0098662(inorganic cation transmembrane transport);GO:0034220(ion transmembrane transport);GO:0006811(ion transport);GO:0030001(metal ion transport);GO:0015075(ion transmembrane transporter activity);GO:0098655(cation transmembrane transport);GO:0071805(potassium ion transmembrane transport);GO:0044425(membrane part);GO:0016020(membrane);GO:0015…	NA
ahy-miR167-3p_L-1	XM_016089739.2	gi|593328512|ref|XP_007137683.1;hypothetical protein PHAVU_009G146900g [Phaseolus vulgaris]	7	GGUGGAGCUGCUGCAAAAUC&GAUCAUGUGGCAGUUUCACC	GO:0016070(RNA metabolic process);GO:0097659(nucleic acid-templated transcription);GO:0032774(RNA biosynthetic process);GO:0043231(intracellular membrane-bounded organelle);GO:0071704(organic substance metabolic process);GO:0010467(gene expression);GO:0006139(nucleobase-containing compound metabolic process);GO:0009987(cellular process);GO:0018130(heterocycle biosynthetic process);GO:0044260(cell…	NA
ahy-miR167-3p_L-1	XM_016094590.2	gi|951070499|ref|XP_014490769.1;PREDICTED: auxin response factor 9-like [Vigna radiata var. radiata]	5.5	GGCCUGAAUUCUGCCACAUGGUU&GAUCAUGUGGCAG-UUUCA--CC	GO:0070887(cellular response to chemical stimulus);GO:0071365(cellular response to auxin stimulus);GO:1901363(heterocyclic compound binding);GO:0005634(nucleus);GO:0051716(cellular response to stimulus);GO:0060255(regulation of macromolecule metabolic process);GO:0031326(regulation of cellular biosynthetic process);GO:0042221(response to chemical);GO:0051252(regulation of RNA metabolic process);G…	ko04075(Plant hormone signal transduction)
ahy-miR167-3p_L-1	XM_016095054.2	gi|356506502|ref|XP_003522020.1;PREDICTED: solute carrier family 40 member 2-like [Glycine max]	5.5	UGUGUAGCUGCCAUAUGGAUC&GAUC-AUGUGGCAGUUUCACC	GO:0006826(iron ion transport);GO:0031224(intrinsic component of membrane);GO:0098660(inorganic ion transmembrane transport);GO:0055085(transmembrane transport);GO:0008324(cation transmembrane transporter activity);GO:0046915(transition metal ion transmembrane transporter activity);GO:0030001(metal ion transport);GO:0044425(membrane part);GO:0046873(metal ion transmembrane transporter activity);G…	NA
ahy-miR167-3p_L-1	XM_016096255.2	gi|356565719|ref|XP_003551085.1;PREDICTED: BTB/POZ domain-containing protein At3g44820-like [Glycine max]	7	GGUG-AACUGCCUAGUGAUA&GAUCAUGUGGCAGUUUCACC	NA	ko03050(Proteasome)
ahy-miR167-3p_L-1	XM_016096550.2	gi|955352784|ref|XP_003541068.2;PREDICTED: polyol transporter 5-like [Glycine max]	13	GGUGGAAUUGCCACUGUUGGGUG&GAUC---AUGUGGCAGUUUCACC	GO:0034219(carbohydrate transmembrane transport);GO:0016020(membrane);GO:0008645(hexose transport);GO:0005886(plasma membrane);GO:0022857(transmembrane transporter activity);GO:0044459(plasma membrane part);GO:0005355(glucose transmembrane transporter activity);GO:0016021(integral component of membrane);GO:1905950(monosaccharide transmembrane transport);GO:1904659(glucose transmembrane transport)…	NA
ahy-miR167-3p_L-1	XM_016097667.2	gi|357459277|ref|XP_003599919.1;aspartyl/glutamyl-tRNA(Asn/Gln) amidotransferase subunit A [Medicago truncatula]	22	GGUGGGACUGCCGGGCUUCCUAUUGGUC&GAUCA--------UGUGGCAGUUUCACC	GO:0044249(cellular biosynthetic process);GO:0043226(organelle);GO:0044446(intracellular organelle part);GO:0009532(plastid stroma);GO:0019752(carboxylic acid metabolic process);GO:0016070(RNA metabolic process);GO:0032553(ribonucleotide binding);GO:0043043(peptide biosynthetic process);GO:0043604(amide biosynthetic process);GO:0035639(purine ribonucleoside triphosphate binding);GO:0044267(cellul…	ko01100(Metabolic pathways);ko00970(Aminoacyl-tRNA biosynthesis)
ahy-miR167-3p_L-1	XM_016098195.2	gi|502143966|ref|XP_004505532.1;PREDICTED: OPA3-like protein [Cicer arietinum]	7	GGUGGUGCUGCCA-GUGGUG&GAUCAUGUGGCAGUUUCACC	NA	NA
ahy-miR167-3p_L-1	XM_016099718.2	gi|502138798|ref|XP_004503532.1;PREDICTED: xaa-Pro dipeptidase [Cicer arietinum]	15	GGUGCUGUUUUUAUGCCACAUGGUC&GAUCAUGUGGCA-----GUUUCACC	GO:0043167(ion binding);GO:0019538(protein metabolic process);GO:0016787(hydrolase activity);GO:0043169(cation binding);GO:0071704(organic substance metabolic process);GO:0008152(metabolic process);GO:0043170(macromolecule metabolic process);GO:0003824(catalytic activity);GO:0006508(proteolysis);GO:0044238(primary metabolic process);GO:0005488(binding);GO:0008238(exopeptidase activity);GO:0046914…	NA
ahy-miR167-3p_L-1	XM_016101238.2	gi|734338418|gb|KHN08793.1;U-box domain-containing protein 21 [Glycine soja]	6.5	GGUGAUGAC-GCCACGUG-UC&GAUCAUGUGGCAGUU-UCACC	NA	ko04120(Ubiquitin mediated proteolysis)
ahy-miR167-3p_L-1	XM_016101242.2	gi|965671469|dbj|BAT86076.1;hypothetical protein VIGAN_04369200 [Vigna angularis var. angularis]	6	GGU--AACUGCCGCAUGUGUC&GAU-CAUGUGGCAGUUUCACC	GO:0005740(mitochondrial envelope);GO:0006163(purine nucleotide metabolic process);GO:0043231(intracellular membrane-bounded organelle);GO:0009161(ribonucleoside monophosphate metabolic process);GO:0006139(nucleobase-containing compound metabolic process);GO:0019866(organelle inner membrane);GO:0006807(nitrogen compound metabolic process);GO:0043226(organelle);GO:0031975(envelope);GO:0009150(puri…	ko00190(Oxidative phosphorylation);ko01100(Metabolic pathways)
ahy-miR167-3p_L-1	XM_016102340.2	gi|965657898|dbj|BAT74317.1;hypothetical protein VIGAN_01196400 [Vigna angularis var. angularis]	8	GGUGGCUGCUGCUGC-UGGUC&GAUCAUGUGGCAGU-UUCACC	GO:0015031(protein transport);GO:0051641(cellular localization);GO:0006614(SRP-dependent cotranslational protein targeting to membrane);GO:0034613(cellular protein localization);GO:0046907(intracellular transport);GO:0044424(intracellular part);GO:0045047(protein targeting to ER);GO:0071702(organic substance transport);GO:0005622(intracellular);GO:0072599(establishment of protein localization to …	ko03060(Protein export)
ahy-miR167-3p_L-1	XM_016102677.1	gi|356512511|ref|XP_003524962.1;PREDICTED: mitochondrial dicarboxylate/tricarboxylate transporter DTC [Glycine max]	7.5	GGUGAAAUGGCUACUGUGGUC&GAUCAU-GUGGCAGUUUCACC	GO:0015849(organic acid transport);GO:0010467(gene expression);GO:0031090(organelle membrane);GO:0016021(integral component of membrane);GO:0098588(bounding membrane of organelle);GO:0019538(protein metabolic process);GO:0009058(biosynthetic process);GO:0015075(ion transmembrane transporter activity);GO:0005622(intracellular);GO:0005310(dicarboxylic acid transmembrane transporter activity);GO:000…	NA
ahy-miR167-3p_L-1	XM_016102768.2	gi|802639551|ref|XP_012078435.1;PREDICTED: protein transport protein SEC23-like [Jatropha curcas]	8	CAAGAAACUGCCGCAGUGGUA&GAUCA-UGUGGCAGUUUCACC	GO:0048193(Golgi vesicle transport);GO:0031982(vesicle);GO:0030117(membrane coat);GO:0044431(Golgi apparatus part);GO:0012507(ER to Golgi transport vesicle membrane);GO:0043229(intracellular organelle);GO:0043227(membrane-bounded organelle);GO:0005623(cell);GO:0015833(peptide transport);GO:0043231(intracellular membrane-bounded organelle);GO:0097708(intracellular vesicle);GO:0044446(intracellular…	ko04141(Protein processing in endoplasmic reticulum)
ahy-miR167-3p_L-1	XM_016103833.2	gi|593693832|ref|XP_007147437.1;hypothetical protein PHAVU_006G124500g [Phaseolus vulgaris]	5	GGUGGAGGUGCCAAAUGAUG&GAUCAUGUGGCAGUUUCACC	GO:0016021(integral component of membrane);GO:0051179(localization);GO:0016020(membrane);GO:0031224(intrinsic component of membrane);GO:0044425(membrane part);GO:0005623(cell);GO:0051234(establishment of localization);GO:0044464(cell part);GO:0006810(transport);GO:0005622(intracellular);GO:0005215(transporter activity)	NA
ahy-miR167-3p_L-1	XM_016107005.2	gi|356568903|ref|XP_003552647.1;PREDICTED: histone-lysine N-methyltransferase ATX2-like [Glycine max];gi|342209882|gb|AEL16988.1;trithorax-like protein [Phaseolus vulgaris]	8	GGUGGGUACUGCCAGCAUGGGU&GAUCAUG-UGGCAGU-UUCACC	GO:0043169(cation binding);GO:0044464(cell part);GO:0050896(response to stimulus);GO:0032259(methylation);GO:0005623(cell);GO:0050789(regulation of biological process);GO:0008152(metabolic process);GO:0008168(methyltransferase activity);GO:0016740(transferase activity);GO:0050794(regulation of cellular process);GO:0007154(cell communication);GO:0043167(ion binding);GO:0043229(intracellular organe…	ko00310(Lysine degradation)
ahy-miR167-3p_L-1	XM_016107438.2	gi|734386426|gb|KHN24951.1;hypothetical protein glysoja_027065 [Glycine soja]	10.5	GGUGAGAAGGCUACAUGUGGAUC&GAUC---AUGUGGCAGUUUCACC	GO:0016021(integral component of membrane);GO:0044425(membrane part);GO:0031224(intrinsic component of membrane);GO:0016020(membrane)	NA
ahy-miR167-3p_L-1	XM_016109742.2	gi|502176609|ref|XP_004515899.1;PREDICTED: myosin heavy chain kinase B-like [Cicer arietinum]	5	GGUGAAAC-GCCACGUGCUC&GAUCAUGUGGCAGUUUCACC	NA	ko01100(Metabolic pathways);ko00565(Ether lipid metabolism);ko04120(Ubiquitin mediated proteolysis)
ahy-miR167-3p_L-1	XM_016113005.2	gi|356571182|ref|XP_003553758.1;PREDICTED: ammonium transporter 3 member 2-like [Glycine max]	6.5	GUUAAAGCUGCCAGCAUGAUC&GAUCAUG-UGGCAGUUUCACC	GO:0006812(cation transport);GO:0051179(localization);GO:0019740(nitrogen utilization);GO:0034220(ion transmembrane transport);GO:0016020(membrane);GO:0015695(organic cation transport);GO:0005623(cell);GO:0022857(transmembrane transporter activity);GO:0044459(plasma membrane part);GO:0006811(ion transport);GO:0071705(nitrogen compound transport);GO:0005886(plasma membrane);GO:0072488(ammonium tra…	NA
ahy-miR167-3p_L-1	XM_016113037.2	gi|356571172|ref|XP_003553753.1;PREDICTED: mediator-associated protein 1 [Glycine max]	15	GGUGGUGCUGCCAUGGGAGGUGGUC&GAUCAU-----GUGGCAGUUUCACC	GO:0016772(transferase activity, transferring phosphorus-containing groups);GO:0010468(regulation of gene expression);GO:0016740(transferase activity);GO:0080090(regulation of primary metabolic process);GO:1903506(regulation of nucleic acid-templated transcription);GO:0010556(regulation of macromolecule biosynthetic process);GO:0051171(regulation of nitrogen compound metabolic process);GO:2001141…	NA
ahy-miR167-3p_L-1	XM_016114614.2	gi|502111218|ref|XP_004493989.1;PREDICTED: cell division control protein 48 homolog D [Cicer arietinum];gi|356505246|ref|XP_003521403.1;PREDICTED: cell division cycle protein 48 homolog [Glycine max]	7	AGUGGAGCUGCCAC-UGAGG&GAUCAUGUGGCAGUUUCACC	GO:0051301(cell division);GO:0032559(adenyl ribonucleotide binding);GO:0043167(ion binding);GO:0097367(carbohydrate derivative binding);GO:0000166(nucleotide binding);GO:0017111(nucleoside-triphosphatase activity);GO:0009987(cellular process);GO:0005488(binding);GO:0035639(purine ribonucleoside triphosphate binding);GO:0016787(hydrolase activity);GO:0030554(adenyl nucleotide binding);GO:0042623(A…	ko04141(Protein processing in endoplasmic reticulum)
ahy-miR167-3p_L-1	XM_016115014.2	gi|593799727|ref|XP_007162901.1;hypothetical protein PHAVU_001G190000g [Phaseolus vulgaris]	6	AGUGGAGCUGCCG-AUGAUG&GAUCAUGUGGCAGUUUCACC	GO:0051186(cofactor metabolic process);GO:0044445(cytosolic part);GO:0043234(protein complex);GO:0044249(cellular biosynthetic process);GO:0009058(biosynthetic process);GO:0044237(cellular metabolic process);GO:0044464(cell part);GO:0006790(sulfur compound metabolic process);GO:0005737(cytoplasm);GO:0097361(CIA complex);GO:0044085(cellular component biogenesis);GO:0032991(macromolecular complex);…	ko03015(mRNA surveillance pathway)
ahy-miR167-3p_L-1	XM_016116394.2	gi|593796428|ref|XP_007161252.1;hypothetical protein PHAVU_001G054800g [Phaseolus vulgaris]	6.5	GGUGGAACUGAAUUACAUGAUC&GAUCAUGUGG--CAGUUUCACC	GO:0016491(oxidoreductase activity);GO:0003824(catalytic activity);GO:0051213(dioxygenase activity)	ko00904(Diterpenoid biosynthesis);ko01110(Biosynthesis of secondary metabolites)
ahy-miR167-3p_L-1	XM_016116430.2	gi|920698758|gb|KOM41983.1;hypothetical protein LR48_Vigan04g218100 [Vigna angularis];gi|356515448|ref|XP_003526412.1;PREDICTED: DEAD-box ATP-dependent RNA helicase 56 [Glycine max]	13.5	GGUGAAGCUGCCAAGAAGGG&GAUCAUGUGGCAGUUUCACC	GO:0016887(ATPase activity);GO:0044422(organelle part);GO:0005681(spliceosomal complex);GO:0017076(purine nucleotide binding);GO:0043170(macromolecule metabolic process);GO:0006810(transport);GO:0060255(regulation of macromolecule metabolic process);GO:0008152(metabolic process);GO:0044428(nuclear part);GO:0097367(carbohydrate derivative binding);GO:1901360(organic cyclic compound metabolic proce…	ko03040(Spliceosome);ko03013(RNA transport);ko03015(mRNA surveillance pathway)
ahy-miR167-3p_L-1	XM_016116738.1	gi|356508471|ref|XP_003522980.1;PREDICTED: RNA-binding protein 38 [Glycine max]	7.5	AGUGGAACUGCUACUUGAGU&GAUCAUGUGGCAGUUUCACC	GO:1901363(heterocyclic compound binding);GO:1901265(nucleoside phosphate binding);GO:0036094(small molecule binding);GO:0005488(binding);GO:0003676(nucleic acid binding);GO:0000166(nucleotide binding);GO:0003723(RNA binding);GO:0097159(organic cyclic compound binding)	ko03040(Spliceosome)
ahy-miR167-3p_L-1	XM_016117287.2	gi|351724953|ref|NP_001235284.1;uncharacterized protein LOC100499990 [Glycine max]	7.5	UAAGACGCUGCCACAUGAGG&GAUCAUGUGGCAGUUUCACC	NA	NA
ahy-miR167-3p_L-1	XM_016118327.2	gi|955338693|ref|XP_014635051.1;PREDICTED: uncharacterized protein LOC100791216 isoform X1 [Glycine max]	9.5	UGUGAAGCUGCCGGAGAGUC&GAUCAUGUGGCAGUUUCACC	GO:0097159(organic cyclic compound binding);GO:0034641(cellular nitrogen compound metabolic process);GO:0005623(cell);GO:0032991(macromolecular complex);GO:0031981(nuclear lumen);GO:0043170(macromolecule metabolic process);GO:0005488(binding);GO:0006725(cellular aromatic compound metabolic process);GO:0003723(RNA binding);GO:0005622(intracellular);GO:0044446(intracellular organelle part);GO:00442…	ko03015(mRNA surveillance pathway)
ahy-miR167-3p_L-1	XM_021125853.1	gi|593697340|ref|XP_007149152.1;hypothetical protein PHAVU_005G045700g [Phaseolus vulgaris];gi|571471715|ref|XP_006585387.1;PREDICTED: nuclear-pore anchor-like [Glycine max];gi|571521870|ref|XP_006598228.1;PREDICTED: nuclear-pore anchor isoform X1 [Glycine max]	5.5	GGUGAGU-UGCCACAAGGUC&GAUCAUGUGGCAGUUUCACC	GO:0034504(protein localization to nucleus);GO:0005215(transporter activity);GO:0033046(negative regulation of sister chromatid segregation);GO:0051170(nuclear import);GO:0051169(nuclear transport);GO:0071705(nitrogen compound transport);GO:0006886(intracellular protein transport);GO:0006810(transport);GO:0045786(negative regulation of cell cycle);GO:0007049(cell cycle);GO:0007094(mitotic spindle…	ko03013(RNA transport)
ahy-miR167-3p_L-1	XM_021126999.1	gi|351724953|ref|NP_001235284.1;uncharacterized protein LOC100499990 [Glycine max]	7.5	UAAGACGCUGCCACAUGAGG&GAUCAUGUGGCAGUUUCACC	NA	NA
ahy-miR167-3p_L-1	XM_021127975.1	gi|951058932|ref|XP_014522293.1;PREDICTED: phospho-2-dehydro-3-deoxyheptonate aldolase 1, chloroplastic-like [Vigna radiata var. radiata]	11.5	GGUGAAGCUGCC-CAGCUAC&GAUCAUGUGGCAGUUUCACC	GO:0006807(nitrogen compound metabolic process);GO:0044238(primary metabolic process);GO:0016740(transferase activity);GO:0009073(aromatic amino acid family biosynthetic process);GO:0071704(organic substance metabolic process);GO:0044249(cellular biosynthetic process);GO:0009072(aromatic amino acid family metabolic process);GO:0043436(oxoacid metabolic process);GO:0009058(biosynthetic process);GO…	ko01110(Biosynthesis of secondary metabolites);ko01100(Metabolic pathways);ko00400(Phenylalanine, tyrosine and tryptophan biosynthesis);ko01230(Biosynthesis of amino acids)
ahy-miR167-3p_L-1	XM_021128182.1	gi|571514732|ref|XP_006597144.1;PREDICTED: uncharacterized protein LOC100779103 isoform X2 [Glycine max];gi|356550559|ref|XP_003543653.1;PREDICTED: uncharacterized protein LOC100816837 isoform X1 [Glycine max]	6.5	GGUGCAGAUCGCCGCGUGAUU&GAUCAUGUGGCAGUUU-CACC	GO:0046916(cellular transition metal ion homeostasis);GO:0006812(cation transport);GO:0009987(cellular process);GO:0050801(ion homeostasis);GO:0042592(homeostatic process);GO:0065007(biological regulation);GO:0043169(cation binding);GO:0098771(inorganic ion homeostasis);GO:0044464(cell part);GO:0043167(ion binding);GO:0046872(metal ion binding);GO:0046914(transition metal ion binding);GO:0030003(…	ko03015(mRNA surveillance pathway);ko03013(RNA transport)
ahy-miR167-3p_L-1	XM_021132508.1	gi|356550516|ref|XP_003543632.1;PREDICTED: probable prolyl 4-hydroxylase 7 [Glycine max]	8.5	AUGGAAGCUGCCCGGUGAUC&GAUCAUGUGGCAGUUUCACC	GO:0031543(peptidyl-proline dioxygenase activity);GO:0005506(iron ion binding);GO:0046914(transition metal ion binding);GO:0019538(protein metabolic process);GO:0044260(cellular macromolecule metabolic process);GO:0043177(organic acid binding);GO:0016705(oxidoreductase activity, acting on paired donors, with incorporation or reduction of molecular oxygen);GO:0004656(procollagen-proline 4-dioxygen…	ko01100(Metabolic pathways);ko00330(Arginine and proline metabolism)
ahy-miR167-3p_L-1	XM_021135188.1	gi|965659414|dbj|BAT75833.1;hypothetical protein VIGAN_01375800 [Vigna angularis var. angularis];gi|593785279|ref|XP_007155680.1;hypothetical protein PHAVU_003G222100g [Phaseolus vulgaris];gi|947054706|gb|KRH04159.1;hypothetical protein GLYMA_17G143300 [Glycine max]	4.5	GGUGGU-CUGCCUCAUGAUC&GAUCAUGUGGCAGUUUCACC	GO:0046914(transition metal ion binding);GO:0043167(ion binding);GO:0005623(cell);GO:0005622(intracellular);GO:0003676(nucleic acid binding);GO:0005488(binding);GO:0097159(organic cyclic compound binding);GO:0005634(nucleus);GO:0043226(organelle);GO:0046872(metal ion binding);GO:1901363(heterocyclic compound binding);GO:0043231(intracellular membrane-bounded organelle);GO:0044464(cell part);GO:00…	NA
ahy-miR167-3p_L-1	XM_021135192.1	gi|965659414|dbj|BAT75833.1;hypothetical protein VIGAN_01375800 [Vigna angularis var. angularis];gi|593785279|ref|XP_007155680.1;hypothetical protein PHAVU_003G222100g [Phaseolus vulgaris];gi|947054706|gb|KRH04159.1;hypothetical protein GLYMA_17G143300 [Glycine max]	4.5	GGUGGU-CUGCCUCAUGAUC&GAUCAUGUGGCAGUUUCACC	GO:0046914(transition metal ion binding);GO:0043167(ion binding);GO:0005623(cell);GO:0005622(intracellular);GO:0003676(nucleic acid binding);GO:0005488(binding);GO:0097159(organic cyclic compound binding);GO:0005634(nucleus);GO:0043226(organelle);GO:0046872(metal ion binding);GO:1901363(heterocyclic compound binding);GO:0043231(intracellular membrane-bounded organelle);GO:0044464(cell part);GO:00…	NA
ahy-miR167-3p_L-1	XM_021139343.1	gi|734329901|gb|KHN06556.1;Homeobox-leucine zipper protein ATHB-16 [Glycine soja]	7.5	GGUGAAGCUGGCACAAGAAC&GAUCAUGUGGCAGUUUCACC	NA	NA
ahy-miR167-3p_L-1	XM_021142002.1	gi|356562759|ref|XP_003549636.1;PREDICTED: nucleobase-ascorbate transporter 6 isoform X1 [Glycine max]	10.5	GGUGAAGCCUUUGCCAUGAUGAUG&GAUCAU-GUGGCA---GUUUCACC	GO:0016021(integral component of membrane);GO:0051179(localization);GO:0006810(transport);GO:0031224(intrinsic component of membrane);GO:0044425(membrane part);GO:0016020(membrane);GO:0051234(establishment of localization);GO:0055085(transmembrane transport);GO:0005215(transporter activity)	NA
ahy-miR167-3p_L-1	BGI_novel_T004464	gi|965657898|dbj|BAT74317.1;hypothetical protein VIGAN_01196400 [Vigna angularis var. angularis]	8	GGUGGCUGCUGCUGC-UGGUC&GAUCAUGUGGCAGU-UUCACC	GO:0048500(signal recognition particle);GO:0044464(cell part);GO:0055085(transmembrane transport);GO:0005623(cell);GO:0051179(localization);GO:0006605(protein targeting);GO:0006614(SRP-dependent cotranslational protein targeting to membrane);GO:0071705(nitrogen compound transport);GO:0006886(intracellular protein transport);GO:0071806(protein transmembrane transport);GO:0097159(organic cyclic com…	ko03060(Protein export)
ahy-miR167-3p_L-1	BGI_novel_T005600	gi|947050856|gb|KRH00385.1;hypothetical protein GLYMA_18G210100 [Glycine max];gi|502104399|ref|XP_004492527.1;PREDICTED: class E vacuolar protein-sorting machinery protein hse1-like [Cicer arietinum];gi|356566755|ref|XP_003551594.1;PREDICTED: mediator of RNA polymerase II transcription subunit 15-like [Glycine max]	7.5	GGUGAAGUUCUGCCAGAUGAAG&GAUCAUGUGGCAG--UUUCACC	NA	ko04075(Plant hormone signal transduction)
ahy-miR167-3p_L-1	BGI_novel_T006311	gi|20138131|sp|Q9FPQ6.1|GP1_CHLRE//RecName: Full=Vegetative cell wall protein gp1; AltName: Full=Hydroxyproline-rich glycoprotein 1; Flags: Precursor	6.5	GGUUAUGGAACUGCCACGUG-UC&GAUCAUGUGGCAGUUUC---ACC	NA	NA
ahy-miR167-3p_L-1	BGI_novel_T008369	gi|593697340|ref|XP_007149152.1;hypothetical protein PHAVU_005G045700g [Phaseolus vulgaris];gi|571471715|ref|XP_006585387.1;PREDICTED: nuclear-pore anchor-like [Glycine max];gi|571521870|ref|XP_006598228.1;PREDICTED: nuclear-pore anchor isoform X1 [Glycine max]	5.5	GGUGAGU-UGCCACAAGGUC&GAUCAUGUGGCAGUUUCACC	GO:0034504(protein localization to nucleus);GO:0005215(transporter activity);GO:0033046(negative regulation of sister chromatid segregation);GO:0051170(nuclear import);GO:0051169(nuclear transport);GO:0071705(nitrogen compound transport);GO:0006886(intracellular protein transport);GO:0006810(transport);GO:0045786(negative regulation of cell cycle);GO:0007049(cell cycle);GO:0007094(mitotic spindle…	ko03013(RNA transport)
ahy-miR167-3p_L-1	BGI_novel_T008838	gi|356508471|ref|XP_003522980.1;PREDICTED: RNA-binding protein 38 [Glycine max]	7.5	AGUGGAACUGCUACUUGAGU&GAUCAUGUGGCAGUUUCACC	GO:1901363(heterocyclic compound binding);GO:1901265(nucleoside phosphate binding);GO:0036094(small molecule binding);GO:0005488(binding);GO:0003676(nucleic acid binding);GO:0000166(nucleotide binding);GO:0003723(RNA binding);GO:0097159(organic cyclic compound binding)	ko03040(Spliceosome)
ahy-miR167-3p_L-1	BGI_novel_T008974	gi|571477885|ref|XP_003533272.2;PREDICTED: uncharacterized protein At5g08430-like [Glycine max];gi|502162881|ref|XP_004512648.1;PREDICTED: uncharacterized protein At5g08430 [Cicer arietinum];gi|947059896|gb|KRH09302.1;hypothetical protein GLYMA_16G208800 [Glycine max]	9.5	CGUGGAACUGCUGCAGAAGAUC&GAUC--AUGUGGCAGUUUCACC	NA	ko00565(Ether lipid metabolism);ko01100(Metabolic pathways);ko01110(Biosynthesis of secondary metabolites)
ahy-miR167-3p_L-1	BGI_novel_T009224	gi|502144710|ref|XP_004505724.1;PREDICTED: phosphoribosylaminoimidazole-succinocarboxamide synthase, chloroplastic [Cicer arietinum];gi|920705076|gb|KOM48301.1;hypothetical protein LR48_Vigan07g200500 [Vigna angularis]	7.5	GGUGGAACUGCCGU-UG-UC&GAUCAUGUGGCAGUUUCACC	GO:0005737(cytoplasm);GO:0043229(intracellular organelle);GO:0005622(intracellular);GO:0044424(intracellular part);GO:0009507(chloroplast);GO:0005623(cell);GO:0044444(cytoplasmic part);GO:0044464(cell part);GO:0043226(organelle);GO:0009536(plastid);GO:0043227(membrane-bounded organelle);GO:0043231(intracellular membrane-bounded organelle)	ko01110(Biosynthesis of secondary metabolites);ko01100(Metabolic pathways);ko00230(Purine metabolism)
ahy-miR167-3p_L-1	BGI_novel_T009323	gi|356569370|ref|XP_003552875.1;PREDICTED: protein FIZZY-RELATED 3-like [Glycine max];gi|593800756|ref|XP_007163415.1;hypothetical protein PHAVU_001G232800g [Phaseolus vulgaris]	6.5	GGUGGAACUGCCGACA-GGUG&GAUCAUGU-GGCAGUUUCACC	GO:0051443(positive regulation of ubiquitin-protein transferase activity);GO:0051338(regulation of transferase activity);GO:0065009(regulation of molecular function);GO:0098772(molecular function regulator);GO:0031323(regulation of cellular metabolic process);GO:0032268(regulation of cellular protein metabolic process);GO:0005488(binding);GO:0031396(regulation of protein ubiquitination);GO:005124…	ko04120(Ubiquitin mediated proteolysis)
ahy-miR167-3p_L-1	BGI_novel_T009753	gi|342365835|gb|AEL30368.1;hypothetical protein 205D04_8 [Arachis hypogaea]	7.5	GGUG-GACUGGCACAUGUGC&GAUCAUGUGGCAGUUUCACC	NA	ko00350(Tyrosine metabolism);ko00360(Phenylalanine metabolism)
ahy-miR167-3p_L-1	BGI_novel_T013444	gi|356516237|ref|XP_003526802.1;PREDICTED: aminoacyl tRNA synthase complex-interacting multifunctional protein 1-like [Glycine max]	7.5	GGAAAAGCUGCCACAUGUGU&GAUCAUGUGGCAGUUUCACC	GO:0009506(plasmodesma);GO:0005488(binding);GO:0044267(cellular protein metabolic process);GO:0043038(amino acid activation);GO:0005911(cell-cell junction);GO:0003723(RNA binding);GO:0006520(cellular amino acid metabolic process);GO:0006399(tRNA metabolic process);GO:0006412(translation);GO:0006807(nitrogen compound metabolic process);GO:0044271(cellular nitrogen compound biosynthetic process);GO…	NA
ahy-miR167-3p_L-1	XM_016077013.2	gi|965659414|dbj|BAT75833.1;hypothetical protein VIGAN_01375800 [Vigna angularis var. angularis];gi|593785279|ref|XP_007155680.1;hypothetical protein PHAVU_003G222100g [Phaseolus vulgaris]	4.5	GGUGGU-CUGCCUCAUGAUC&GAUCAUGUGGCAGUUUCACC	GO:0005488(binding);GO:0046872(metal ion binding);GO:0043167(ion binding);GO:0046914(transition metal ion binding);GO:0044424(intracellular part);GO:0008270(zinc ion binding);GO:0003676(nucleic acid binding);GO:0043231(intracellular membrane-bounded organelle);GO:1901363(heterocyclic compound binding);GO:0005622(intracellular);GO:0043229(intracellular organelle);GO:0043227(membrane-bounded organe…	NA
ahy-miR167-3p_L-1	XM_016077326.2	gi|356552864|ref|XP_003544782.1;PREDICTED: random slug protein 5-like [Glycine max]	5.5	CGUGAAACUGCC-CAUGUAUU&GAU-CAUGUGGCAGUUUCACC	NA	ko00970(Aminoacyl-tRNA biosynthesis);ko03015(mRNA surveillance pathway);ko01100(Metabolic pathways)
ahy-miR167-3p_L-1	XM_016085812.2	gi|734351787|gb|KHN12918.1;Pyruvate kinase isozyme G, chloroplastic [Glycine soja]	8	GGUGAAACUGCU-CAUGGAA&GAUCAUGUGGCAGUUUCACC	GO:0009126(purine nucleoside monophosphate metabolic process);GO:1901564(organonitrogen compound metabolic process);GO:0044281(small molecule metabolic process);GO:0006725(cellular aromatic compound metabolic process);GO:0006796(phosphate-containing compound metabolic process);GO:0006091(generation of precursor metabolites and energy);GO:0000287(magnesium ion binding);GO:0006753(nucleoside phosph…	ko01100(Metabolic pathways);ko00620(Pyruvate metabolism);ko00010(Glycolysis / Gluconeogenesis);ko01200(Carbon metabolism);ko01230(Biosynthesis of amino acids);ko00230(Purine metabolism);ko01110(Biosynthesis of secondary metabolites)
ahy-miR167-3p_L-1	XM_016086065.2	gi|965607742|dbj|BAT94233.1;hypothetical protein VIGAN_08081700 [Vigna angularis var. angularis]	6.5	GGUGAGUG-GCCACUUGAUC&GAUCAUGUGGCAGUUUCACC	GO:0044260(cellular macromolecule metabolic process);GO:0071704(organic substance metabolic process);GO:0016740(transferase activity);GO:0044267(cellular protein metabolic process);GO:0043412(macromolecule modification);GO:0044237(cellular metabolic process);GO:0043170(macromolecule metabolic process);GO:0006464(cellular protein modification process);GO:1901564(organonitrogen compound metabolic p…	NA
ahy-miR167-3p_L-1	XM_016088610.2	gi|947082472|gb|KRH31261.1;hypothetical protein GLYMA_11G237800 [Glycine max]	6.5	GAAGAAGCUGCUACA-GAUC&GAUCAUGUGGCAGUUUCACC	GO:0005634(nucleus);GO:0043231(intracellular membrane-bounded organelle);GO:0043227(membrane-bounded organelle);GO:0044464(cell part);GO:0005622(intracellular);GO:0043229(intracellular organelle);GO:0005737(cytoplasm);GO:0005623(cell);GO:0044424(intracellular part);GO:0043226(organelle)	NA
ahy-miR167-3p_L-1	XM_016090204.2	gi|502131934|ref|XP_004501157.1;PREDICTED: carotenoid cleavage dioxygenase 8 homolog B, chloroplastic [Cicer arietinum]	10.5	GGUGAAGCCUGGCUACGUGGUG&GAUCAUGUGGC--AGUUUCACC	GO:0016701(oxidoreductase activity, acting on single donors with incorporation of molecular oxygen);GO:0003824(catalytic activity);GO:0051213(dioxygenase activity);GO:0016702(oxidoreductase activity, acting on single donors with incorporation of molecular oxygen, incorporation of two atoms of oxygen);GO:0055114(oxidation-reduction process);GO:0008152(metabolic process);GO:0016491(oxidoreductase a…	ko00906(Carotenoid biosynthesis)
ahy-miR167-3p_L-1	XM_016090369.2	gi|951013322|ref|XP_014510282.1;PREDICTED: protein starmaker-like [Vigna radiata var. radiata]	6.5	AGUGAUGCUGCCGCA-GAUG&GAUCAUGUGGCAGUUUCACC	NA	NA
ahy-miR167-3p_L-1	XM_016092368.2	gi|356498468|ref|XP_003518074.1;PREDICTED: BTB/POZ domain-containing protein At5g66560-like isoform X2 [Glycine max]	9	GGUGAAGGCAGUGCCGCGAGGUC&GAUCAUGUGGCAGU---UUCACC	GO:0031224(intrinsic component of membrane);GO:0044425(membrane part);GO:0016021(integral component of membrane);GO:0016020(membrane)	NA
ahy-miR167-3p_L-1	XM_016093387.2	gi|571481543|ref|XP_006588689.1;PREDICTED: tetratricopeptide repeat protein 7A-like [Glycine max]	10	GGUGUGGCUGCCACCCUAUGCUC&GAUCAU---GUGGCAGUUUCACC	NA	NA
ahy-miR167-3p_L-1	XM_016095013.2	gi|698476475|ref|XP_009785556.1;PREDICTED: abscisic acid receptor PYL4-like [Nicotiana sylvestris]	6.5	CGUGAAGAGCUGCCACGUCAUC&GAUCAUGUGGCAGU--UUCACC	NA	ko04075(Plant hormone signal transduction);ko04016(MAPK signaling pathway - plant)
ahy-miR167-3p_L-1	XM_016097743.2	gi|356542784|ref|XP_003539845.1;PREDICTED: protein YLS9-like [Glycine max]	8	GGUGCGGGUGCCGUCGUGGUC&GAUCAUG-UGGCAGUUUCACC	GO:0065007(biological regulation);GO:0005911(cell-cell junction);GO:0051716(cellular response to stimulus);GO:0031225(anchored component of membrane);GO:0016021(integral component of membrane);GO:0031226(intrinsic component of plasma membrane);GO:0044425(membrane part);GO:0044464(cell part);GO:0006950(response to stress);GO:0071944(cell periphery);GO:0009506(plasmodesma);GO:0005886(plasma membran…	NA
ahy-miR167-3p_L-1	XM_016100264.2	gi|449438313|ref|XP_004136933.1;PREDICTED: magnesium transporter MRS2-3 isoform X1 [Cucumis sativus]	10	GGUGGAGCUGCUGCAAGCGAUG&GAUC--AUGUGGCAGUUUCACC	GO:0016020(membrane);GO:0031224(intrinsic component of membrane);GO:0044425(membrane part);GO:0016021(integral component of membrane)	NA
ahy-miR167-3p_L-1	XM_016100982.2	gi|593792570|ref|XP_007159324.1;hypothetical protein PHAVU_002G228500g [Phaseolus vulgaris]	13	CGUGAGGCUGCCACUAGCAA&GAUCAUGUGGCAGUUUCACC	GO:0033036(macromolecule localization);GO:1901363(heterocyclic compound binding);GO:0098791(Golgi subcompartment);GO:0072659(protein localization to plasma membrane);GO:0070727(cellular macromolecule localization);GO:0045184(establishment of protein localization);GO:0005524(ATP binding);GO:0005622(intracellular);GO:1990778(protein localization to cell periphery);GO:0044446(intracellular organelle…	NA
ahy-miR167-3p_L-1	XM_016101572.2	gi|965614652|dbj|BAU00285.1;hypothetical protein VIGAN_10186600 [Vigna angularis var. angularis]	7	GGUGGAACUGCUAUGUUGGUU&GAUCA-UGUGGCAGUUUCACC	GO:0003824(catalytic activity);GO:0016787(hydrolase activity)	ko00500(Starch and sucrose metabolism)
ahy-miR167-3p_L-1	XM_016102144.2	gi|734329901|gb|KHN06556.1;Homeobox-leucine zipper protein ATHB-16 [Glycine soja]	7.5	GGUGAAGCUGGCACAAGAAC&GAUCAUGUGGCAGUUUCACC	NA	NA
ahy-miR167-3p_L-1	XM_016102339.2	gi|965657898|dbj|BAT74317.1;hypothetical protein VIGAN_01196400 [Vigna angularis var. angularis]	8	GGUGGCUGCUGCUGC-UGGUC&GAUCAUGUGGCAGU-UUCACC	GO:0048500(signal recognition particle);GO:0044464(cell part);GO:0055085(transmembrane transport);GO:0005623(cell);GO:0051179(localization);GO:0006605(protein targeting);GO:0006614(SRP-dependent cotranslational protein targeting to membrane);GO:0071705(nitrogen compound transport);GO:0006886(intracellular protein transport);GO:0071806(protein transmembrane transport);GO:0097159(organic cyclic com…	ko03060(Protein export)
ahy-miR167-3p_L-1	XM_016102682.2	gi|734329732|gb|KHN06387.1;Mitogen-activated protein kinase 7 [Glycine soja];gi|951064431|ref|XP_014523511.1;PREDICTED: mitogen-activated protein kinase 7 [Vigna radiata var. radiata]	10.5	GGUGAAGCUGCUAAGGCAU-AUC&GAUCAUGU---GGCAGUUUCACC	GO:0000166(nucleotide binding);GO:0017076(purine nucleotide binding);GO:0016310(phosphorylation);GO:0050896(response to stimulus);GO:0050789(regulation of biological process);GO:0032553(ribonucleotide binding);GO:0044260(cellular macromolecule metabolic process);GO:0007154(cell communication);GO:0097367(carbohydrate derivative binding);GO:0043168(anion binding);GO:0036094(small molecule binding);…	ko04016(MAPK signaling pathway - plant)
ahy-miR167-3p_L-1	XM_016103194.2	gi|951042104|ref|XP_014518091.1;PREDICTED: endo-1,3;1,4-beta-D-glucanase-like [Vigna radiata var. radiata]	7	GGUGUUACUGCCAUA-GGUG&GAUCAUGUGGCAGUUUCACC	GO:0003824(catalytic activity);GO:0016787(hydrolase activity)	ko01100(Metabolic pathways);ko01110(Biosynthesis of secondary metabolites)
ahy-miR167-3p_L-1	XM_016103216.2	gi|593694594|ref|XP_007147818.1;hypothetical protein PHAVU_006G157500g [Phaseolus vulgaris]	7.5	GCUGAGGCUGCCACG-GGUU&GAUCAUGUGGCAGUUUCACC	NA	NA
ahy-miR167-3p_L-1	XM_016103344.2	gi|356543498|ref|XP_003540197.1;PREDICTED: altered inheritance rate of mitochondria protein 25 [Glycine max]	13.5	GGAUGAGACUGCUUGAUGGUGAUC&GAUCAU---GUGGCAGUUUCA-CC	GO:0061024(membrane organization);GO:0016043(cellular component organization);GO:0007009(plasma membrane organization);GO:0009987(cellular process);GO:0071840(cellular component organization or biogenesis);GO:0005548(phospholipid transporter activity);GO:0065008(regulation of biological quality);GO:0097035(regulation of membrane lipid distribution);GO:0016020(membrane);GO:0065007(biological regul…	NA
ahy-miR167-3p_L-1	XM_016104060.2	gi|593693686|ref|XP_007147364.1;hypothetical protein PHAVU_006G118000g [Phaseolus vulgaris];gi|951072036|ref|XP_014491496.1;PREDICTED: uncharacterized protein LOC106754067 isoform X2 [Vigna radiata var. radiata]	18	GGUGGAGCUGCUAGAAUAGAGGAUC&GAUC-----AUGUGGCAGUUUCACC	NA	NA
ahy-miR167-3p_L-1	XM_016104084.2	gi|922386220|ref|XP_003594790.2;calmodulin-binding transcription activator [Medicago truncatula]	7.5	GGUGGAUGUACUGCUGC-UGAUC&GAUCAUGUGGCAGU---UUCACC	GO:0031328(positive regulation of cellular biosynthetic process);GO:0043565(sequence-specific DNA binding);GO:0010556(regulation of macromolecule biosynthetic process);GO:0048522(positive regulation of cellular process);GO:0051254(positive regulation of RNA metabolic process);GO:0005634(nucleus);GO:0097159(organic cyclic compound binding);GO:0031325(positive regulation of cellular metabolic proce…	ko00590(Arachidonic acid metabolism);ko01110(Biosynthesis of secondary metabolites);ko00592(alpha-Linolenic acid metabolism);ko01100(Metabolic pathways);ko00564(Glycerophospholipid metabolism);ko00591(Linoleic acid metabolism);ko00100(Steroid biosynthesis);ko00561(Glycerolipid metabolism);ko00565(Ether lipid metabolism)
ahy-miR167-3p_L-1	XM_016105334.2	gi|965669928|dbj|BAT84535.1;hypothetical protein VIGAN_04194200 [Vigna angularis var. angularis];gi|356523219|ref|XP_003530239.1;PREDICTED: uncharacterized protein LOC100786732 [Glycine max]	8	GGUGGGGUGCCUGCCGCAUCGAUU&GAUC-AUGUGGCAG---UUUCACC	NA	NA
ahy-miR167-3p_L-1	XM_016106405.2	gi|571548553|ref|XP_006602819.1;PREDICTED: uncharacterized protein LOC100816751 isoform X1 [Glycine max]	4.5	GGUGGAACUGUC-UAUGAUC&GAUCAUGUGGCAGUUUCACC	GO:0016021(integral component of membrane);GO:0044425(membrane part);GO:0031224(intrinsic component of membrane);GO:0016020(membrane)	NA
ahy-miR167-3p_L-1	XM_016108245.2	gi|965614724|dbj|BAU00357.1;hypothetical protein VIGAN_10194300 [Vigna angularis var. angularis]	8	GGUGAACGUGCCAUCAGGUC&GAUCAUGUGGCAGUUUCACC	GO:0003824(catalytic activity)	NA
ahy-miR167-3p_L-1	XM_016111317.2	gi|502163283|ref|XP_004512789.1;PREDICTED: exonuclease 1 isoform X1 [Cicer arietinum]	5	GGUGGAAUUGCUGCAGUGAUC&GAUCA-UGUGGCAGUUUCACC	GO:0016788(hydrolase activity, acting on ester bonds);GO:0051716(cellular response to stimulus);GO:0008152(metabolic process);GO:0003676(nucleic acid binding);GO:1901363(heterocyclic compound binding);GO:0044237(cellular metabolic process);GO:0005622(intracellular);GO:0046483(heterocycle metabolic process);GO:0044238(primary metabolic process);GO:0005623(cell);GO:0050896(response to stimulus);GO:…	ko03430(Mismatch repair)
ahy-miR167-3p_L-1	XM_016112113.2	gi|951054124|ref|XP_014521156.1;PREDICTED: serine/threonine-protein kinase STN7, chloroplastic [Vigna radiata var. radiata]	10.5	GGAGAAGCUGCCAAGUGGGUC&GAUC-AUGUGGCAGUUUCACC	GO:0032559(adenyl ribonucleotide binding);GO:0043231(intracellular membrane-bounded organelle);GO:0016310(phosphorylation);GO:0006796(phosphate-containing compound metabolic process);GO:0010109(regulation of photosynthesis);GO:0016772(transferase activity, transferring phosphorus-containing groups);GO:0017076(purine nucleotide binding);GO:0005488(binding);GO:0044267(cellular protein metabolic pro…	NA
ahy-miR167-3p_L-1	XM_016113265.2	gi|593800466|ref|XP_007163270.1;hypothetical protein PHAVU_001G220300g [Phaseolus vulgaris]	7.5	GGUGAAAUUGCU-CGUGAAG&GAUCAUGUGGCAGUUUCACC	GO:0005623(cell);GO:0044464(cell part);GO:0071944(cell periphery);GO:0005886(plasma membrane);GO:0016020(membrane)	NA
ahy-miR167-3p_L-1	XM_016116428.2	gi|920698758|gb|KOM41983.1;hypothetical protein LR48_Vigan04g218100 [Vigna angularis];gi|356515448|ref|XP_003526412.1;PREDICTED: DEAD-box ATP-dependent RNA helicase 56 [Glycine max]	13.5	GGUGAAGCUGCCAAGAAGGG&GAUCAUGUGGCAGUUUCACC	GO:0016887(ATPase activity);GO:0044422(organelle part);GO:0005681(spliceosomal complex);GO:0017076(purine nucleotide binding);GO:0043170(macromolecule metabolic process);GO:0006810(transport);GO:0060255(regulation of macromolecule metabolic process);GO:0008152(metabolic process);GO:0044428(nuclear part);GO:0097367(carbohydrate derivative binding);GO:1901360(organic cyclic compound metabolic proce…	ko03040(Spliceosome);ko03013(RNA transport);ko03015(mRNA surveillance pathway)
ahy-miR167-3p_L-1	XM_016117827.2	gi|734416420|gb|KHN38299.1;DNA/RNA-binding protein KIN17 [Glycine soja]	7.5	GGUGGUACUGCCAGAUGUGC&GAUCAUGUGGCAGUUUCACC	GO:1901576(organic substance biosynthetic process);GO:0044424(intracellular part);GO:0071704(organic substance metabolic process);GO:0043170(macromolecule metabolic process);GO:0006807(nitrogen compound metabolic process);GO:0006260(DNA replication);GO:0044237(cellular metabolic process);GO:0050896(response to stimulus);GO:0043226(organelle);GO:0003676(nucleic acid binding);GO:0005488(binding);GO…	NA
ahy-miR167-3p_L-1	XM_021124754.1	gi|593799727|ref|XP_007162901.1;hypothetical protein PHAVU_001G190000g [Phaseolus vulgaris]	6	AGUGGAGCUGCCG-AUGAUG&GAUCAUGUGGCAGUUUCACC	GO:0051186(cofactor metabolic process);GO:0044445(cytosolic part);GO:0043234(protein complex);GO:0044249(cellular biosynthetic process);GO:0009058(biosynthetic process);GO:0044237(cellular metabolic process);GO:0044464(cell part);GO:0006790(sulfur compound metabolic process);GO:0005737(cytoplasm);GO:0097361(CIA complex);GO:0044085(cellular component biogenesis);GO:0032991(macromolecular complex);…	ko03015(mRNA surveillance pathway)
ahy-miR167-3p_L-1	XM_021125093.1	gi|356571611|ref|XP_003553970.1;PREDICTED: acyltransferase-like protein At3g26840, chloroplastic [Glycine max];gi|357508295|ref|XP_003624436.1;esterase/lipase/thioesterase family protein [Medicago truncatula]	8.5	GGUGGAGC-GCCGCGGUGGUU&GAUCAU-GUGGCAGUUUCACC	GO:0016747(transferase activity, transferring acyl groups other than amino-acyl groups);GO:1901615(organic hydroxy compound metabolic process);GO:0009987(cellular process);GO:0003824(catalytic activity);GO:0006720(isoprenoid metabolic process);GO:0033306(phytol metabolic process);GO:0044424(intracellular part);GO:0044238(primary metabolic process);GO:0010287(plastoglobule);GO:1903173(fatty alcoho…	NA
ahy-miR167-3p_L-1	XM_021135190.1	gi|965659414|dbj|BAT75833.1;hypothetical protein VIGAN_01375800 [Vigna angularis var. angularis];gi|593785279|ref|XP_007155680.1;hypothetical protein PHAVU_003G222100g [Phaseolus vulgaris];gi|947054706|gb|KRH04159.1;hypothetical protein GLYMA_17G143300 [Glycine max]	4.5	GGUGGU-CUGCCUCAUGAUC&GAUCAUGUGGCAGUUUCACC	GO:0046914(transition metal ion binding);GO:0043167(ion binding);GO:0005623(cell);GO:0005622(intracellular);GO:0003676(nucleic acid binding);GO:0005488(binding);GO:0097159(organic cyclic compound binding);GO:0005634(nucleus);GO:0043226(organelle);GO:0046872(metal ion binding);GO:1901363(heterocyclic compound binding);GO:0043231(intracellular membrane-bounded organelle);GO:0044464(cell part);GO:00…	NA
ahy-miR167-3p_L-1	XM_021138747.1	gi|449438313|ref|XP_004136933.1;PREDICTED: magnesium transporter MRS2-3 isoform X1 [Cucumis sativus]	10	GGUGGAGCUGCUGCAAGCGAUG&GAUC--AUGUGGCAGUUUCACC	GO:0016020(membrane);GO:0031224(intrinsic component of membrane);GO:0044425(membrane part);GO:0016021(integral component of membrane)	NA
ahy-miR167-3p_L-1	XM_021138748.1	gi|449438313|ref|XP_004136933.1;PREDICTED: magnesium transporter MRS2-3 isoform X1 [Cucumis sativus]	10	GGUGGAGCUGCUGCAAGCGAUG&GAUC--AUGUGGCAGUUUCACC	GO:0016020(membrane);GO:0031224(intrinsic component of membrane);GO:0044425(membrane part);GO:0016021(integral component of membrane)	NA
ahy-miR167-3p_L-1	XM_021139552.1	gi|734329732|gb|KHN06387.1;Mitogen-activated protein kinase 7 [Glycine soja];gi|951064431|ref|XP_014523511.1;PREDICTED: mitogen-activated protein kinase 7 [Vigna radiata var. radiata]	10.5	GGUGAAGCUGCUAAGGCAU-AUC&GAUCAUGU---GGCAGUUUCACC	GO:0000166(nucleotide binding);GO:0017076(purine nucleotide binding);GO:0016310(phosphorylation);GO:0050896(response to stimulus);GO:0050789(regulation of biological process);GO:0032553(ribonucleotide binding);GO:0044260(cellular macromolecule metabolic process);GO:0007154(cell communication);GO:0097367(carbohydrate derivative binding);GO:0043168(anion binding);GO:0036094(small molecule binding);…	ko04016(MAPK signaling pathway - plant)
ahy-miR167-3p_L-1	XM_021144146.1	gi|388491266|gb|AFK33699.1;unknown [Lotus japonicus]	9.5	GGUGAAGCUGCUUGGUGAGG&GAUCAUGUGGCAGUUUCACC	GO:0043168(anion binding);GO:0005488(binding);GO:0044281(small molecule metabolic process);GO:0048037(cofactor binding);GO:0097159(organic cyclic compound binding);GO:0043167(ion binding);GO:0018130(heterocycle biosynthetic process);GO:0008652(cellular amino acid biosynthetic process);GO:1901576(organic substance biosynthetic process);GO:1901360(organic cyclic compound metabolic process);GO:00038…	ko00400(Phenylalanine, tyrosine and tryptophan biosynthesis);ko01100(Metabolic pathways);ko00260(Glycine, serine and threonine metabolism);ko01110(Biosynthesis of secondary metabolites);ko01230(Biosynthesis of amino acids)
ahy-miR3508	BGI_novel_T000350	gi|571537389|ref|XP_006600988.1;PREDICTED: uncharacterized protein LOC100818172 isoform X1 [Glycine max];gi|502153079|ref|XP_004509208.1;PREDICTED: uncharacterized protein LOC101497795 [Cicer arietinum]	11.5	GGGGAACAUGGGGGCCGGAAG&UAGAGGGUCCCCAUGUUCUCA	NA	NA
ahy-miR3508	BGI_novel_T002849	gi|920708849|gb|KOM50846.1;hypothetical protein LR48_Vigan08g167300 [Vigna angularis];gi|571492081|ref|XP_003540686.2;PREDICTED: extra-large guanine nucleotide-binding protein 1-like [Glycine max]	7.5	UGAGGACAUGGAUGAUCCUUCUA&UAGA-GGGUC-CCCAUGUUCUCA	GO:1901265(nucleoside phosphate binding);GO:0000166(nucleotide binding);GO:0036094(small molecule binding);GO:1901363(heterocyclic compound binding);GO:0005488(binding);GO:0097159(organic cyclic compound binding)	NA
ahy-miR3508	BGI_novel_T008789	gi|764537226|ref|XP_011458839.1;PREDICTED: homeobox protein knotted-1-like 3 isoform X2 [Fragaria vesca subsp. vesca];gi|965662418|dbj|BAT78127.1;hypothetical protein VIGAN_02076800 [Vigna angularis var. angularis];gi|955364145|ref|XP_014622540.1;PREDICTED: homeobox protein knotted-1-like 3 isoform X2 [Glycine max];gi|764537220|ref|XP_011458838.1;PREDICTED: homeobox protein knotted-1-like 3 isofo…	12.5	AGAUAGCAUGGGGUUUGGCCCUCUU&UAGAGGGU----CCCCAUGUUCUCA	NA	NA
ahy-miR3508	BGI_novel_T011505	gi|356499161|ref|XP_003518411.1;PREDICTED: uncharacterized oxidoreductase At4g09670-like [Glycine max]	10	AGAGGAGGCCGGGGGCCCUCGA&UAGAGGGUCCCC-AUGUUCUCA	GO:1901363(heterocyclic compound binding);GO:0003676(nucleic acid binding);GO:0005488(binding);GO:0003723(RNA binding);GO:0097159(organic cyclic compound binding)	ko03040(Spliceosome)
ahy-miR3508	BGI_novel_T011506	gi|734370801|gb|KHN19417.1;Quinone oxidoreductase 1 [Glycine soja]	10	AGAGGAGGCCGGGGGCCCUCGA&UAGAGGGUCCCC-AUGUUCUCA	GO:0003723(RNA binding);GO:0003676(nucleic acid binding);GO:0097159(organic cyclic compound binding);GO:1901363(heterocyclic compound binding);GO:0005488(binding)	ko03040(Spliceosome)
ahy-miR3508	XM_016077323.2	gi|502103363|ref|XP_004492264.1;PREDICTED: probable mitochondrial-processing peptidase subunit beta [Cicer arietinum]	11	CGAGAACAUGGGAGGCCACCUCAA&UAGAGG--GUC-CCCAUGUUCUCA	GO:0006796(phosphate-containing compound metabolic process);GO:0004222(metalloendopeptidase activity);GO:0022900(electron transport chain);GO:0046872(metal ion binding);GO:0046483(heterocycle metabolic process);GO:0070469(respiratory chain);GO:0043231(intracellular membrane-bounded organelle);GO:0009199(ribonucleoside triphosphate metabolic process);GO:0009259(ribonucleotide metabolic process);GO…	NA
ahy-miR3508	XM_016078244.2	gi|593783487|ref|XP_007154784.1;hypothetical protein PHAVU_003G147700g [Phaseolus vulgaris];gi|357479735|ref|XP_003610153.1;xyloglucan endotransglucosylase/hydrolase family protein [Medicago truncatula];gi|728808275|gb|KHF98175.1;putative xyloglucan endotransglucosylase/hydrolase 23 -like protein [Gossypium arboreum];gi|388518287|gb|AFK47205.1;unknown [Lotus japonicus]	8.5	AGAGAGCAUGGGUGUCCC-CUU&UAGAGGGUC-CCCAUGUUCUCA	GO:0071555(cell wall organization);GO:0016762(xyloglucan:xyloglucosyl transferase activity);GO:0009987(cellular process);GO:0016757(transferase activity, transferring glycosyl groups);GO:0016787(hydrolase activity);GO:0044238(primary metabolic process);GO:0005576(extracellular region);GO:0016043(cellular component organization);GO:0010411(xyloglucan metabolic process);GO:0016758(transferase activ…	ko04075(Plant hormone signal transduction)
ahy-miR3508	XM_016079316.2	gi|955323722|ref|XP_003526577.2;PREDICTED: 7-deoxyloganetin glucosyltransferase-like isoform X2 [Glycine max]	6.5	UGAGUUUGCAUGGGGACUCGCUA&UAGAGGGUCCCCAUGU--UCUCA	GO:0032787(monocarboxylic acid metabolic process);GO:0016758(transferase activity, transferring hexosyl groups);GO:0005975(carbohydrate metabolic process);GO:0052696(flavonoid glucuronidation);GO:0044464(cell part);GO:0016757(transferase activity, transferring glycosyl groups);GO:0043227(membrane-bounded organelle);GO:0006082(organic acid metabolic process);GO:0003824(catalytic activity);GO:00432…	ko00040(Pentose and glucuronate interconversions);ko01110(Biosynthesis of secondary metabolites);ko00053(Ascorbate and aldarate metabolism);ko01100(Metabolic pathways);ko00860(Porphyrin and chlorophyll metabolism);ko00460(Cyanoamino acid metabolism)
ahy-miR3508	XM_016080215.2	gi|593699751|ref|XP_007150314.1;hypothetical protein PHAVU_005G143100g [Phaseolus vulgaris]	6	UGAGAACAU---GACCCUCUA&UAGAGGGUCCCCAUGUUCUCA	NA	ko04712(Circadian rhythm - plant)
ahy-miR3508	XM_016081587.2	gi|920707209|gb|KOM49206.1;hypothetical protein LR48_Vigan08g003300 [Vigna angularis]	9.5	CGGGCGCGUGGGGAUCGUCGA&UAGAGGGUCCCCAUGUUCUCA	GO:0043229(intracellular organelle);GO:0005634(nucleus);GO:0005623(cell);GO:0005737(cytoplasm);GO:0044424(intracellular part);GO:0043226(organelle);GO:0005622(intracellular);GO:0044464(cell part);GO:0043227(membrane-bounded organelle);GO:0043231(intracellular membrane-bounded organelle)	ko04075(Plant hormone signal transduction)
ahy-miR3508	XM_016081992.2	gi|356508929|ref|XP_003523205.1;PREDICTED: NAC domain-containing protein 2 [Glycine max]	10	UGAGAUCAUGGGGACCAAAGC&UAGAGGGUCCCCAUGUUCUCA	GO:0043229(intracellular organelle);GO:0019219(regulation of nucleobase-containing compound metabolic process);GO:0009889(regulation of biosynthetic process);GO:0050794(regulation of cellular process);GO:0050789(regulation of biological process);GO:0044424(intracellular part);GO:2000112(regulation of cellular macromolecule biosynthetic process);GO:0031323(regulation of cellular metabolic process)…	ko03013(RNA transport);ko04141(Protein processing in endoplasmic reticulum);ko01100(Metabolic pathways);ko00561(Glycerolipid metabolism);ko03018(RNA degradation);ko04120(Ubiquitin mediated proteolysis);ko03015(mRNA surveillance pathway)
ahy-miR3508	XM_016082004.2	gi|593524513|ref|XP_007142217.1;hypothetical protein PHAVU_008G262000g [Phaseolus vulgaris]	19	UGGGAGCAUGGGAAGCUUUGGUCCCUCUC&UAGAGGG-UC-------CCCAUGUUCUCA	GO:0003824(catalytic activity);GO:0016757(transferase activity, transferring glycosyl groups);GO:0016758(transferase activity, transferring hexosyl groups);GO:0016020(membrane);GO:0008152(metabolic process);GO:0031224(intrinsic component of membrane);GO:0016021(integral component of membrane);GO:0016740(transferase activity);GO:0044425(membrane part)	ko01110(Biosynthesis of secondary metabolites);ko00130(Ubiquinone and other terpenoid-quinone biosynthesis);ko00942(Anthocyanin biosynthesis)
ahy-miR3508	XM_016082378.1	gi|593784495|ref|XP_007155288.1;hypothetical protein PHAVU_003G188200g [Phaseolus vulgaris]	10.5	UGGGAGCUAUGGGGAUUACCCUGUG&UAGAGGG---UCCCCAU-GUUCUCA	GO:0016021(integral component of membrane);GO:0016740(transferase activity);GO:0044425(membrane part);GO:0016020(membrane);GO:0016757(transferase activity, transferring glycosyl groups);GO:0031224(intrinsic component of membrane);GO:0003824(catalytic activity)	NA
ahy-miR3508	XM_016085585.2	gi|593781849|ref|XP_007153965.1;hypothetical protein PHAVU_003G080200g [Phaseolus vulgaris]	7.5	CGAGGAUGAGGGGACUCUCAC&UAGAGGGUCCCCAUGUUCUCA	GO:0003676(nucleic acid binding);GO:0042274(ribosomal small subunit biogenesis);GO:0006396(RNA processing);GO:0044260(cellular macromolecule metabolic process);GO:0031974(membrane-enclosed lumen);GO:0005623(cell);GO:0005488(binding);GO:0005730(nucleolus);GO:0006725(cellular aromatic compound metabolic process);GO:0005622(intracellular);GO:0043234(protein complex);GO:0016072(rRNA metabolic process…	ko03008(Ribosome biogenesis in eukaryotes)
ahy-miR3508	XM_016086377.2	gi|571484965|ref|XP_006589704.1;PREDICTED: protein RNA-directed DNA methylation 3-like isoform X1 [Glycine max];gi|955347597|ref|XP_014618911.1;PREDICTED: protein RNA-directed DNA methylation 3-like isoform X2 [Glycine max]	8.5	GGAGAACGCGGGGGCUUUCGU&UAGAGGGUCCCCAUGUUCUCA	GO:0044451(nucleoplasm part);GO:0006351(transcription, DNA-templated);GO:0044238(primary metabolic process);GO:0097159(organic cyclic compound binding);GO:0005623(cell);GO:0043043(peptide biosynthetic process);GO:0051171(regulation of nitrogen compound metabolic process);GO:0043233(organelle lumen);GO:0043603(cellular amide metabolic process);GO:0070013(intracellular organelle lumen);GO:0044422(o…	NA
ahy-miR3508	XM_016086377.2	gi|571484965|ref|XP_006589704.1;PREDICTED: protein RNA-directed DNA methylation 3-like isoform X1 [Glycine max];gi|955347597|ref|XP_014618911.1;PREDICTED: protein RNA-directed DNA methylation 3-like isoform X2 [Glycine max]	7.5	GGAGAACGUGGGGGCUUUCGU&UAGAGGGUCCCCAUGUUCUCA	GO:0044451(nucleoplasm part);GO:0006351(transcription, DNA-templated);GO:0044238(primary metabolic process);GO:0097159(organic cyclic compound binding);GO:0005623(cell);GO:0043043(peptide biosynthetic process);GO:0051171(regulation of nitrogen compound metabolic process);GO:0043233(organelle lumen);GO:0043603(cellular amide metabolic process);GO:0070013(intracellular organelle lumen);GO:0044422(o…	NA
ahy-miR3508	XM_016092902.2	gi|593692532|ref|XP_007146808.1;hypothetical protein PHAVU_006G071400g [Phaseolus vulgaris]	12	UGAGAGGAUGACAAGGGAACCCUCUG&UAGAGGGU-CCC----CAUGUUCUCA	NA	NA
ahy-miR3508	XM_016095212.2	gi|703163664|ref|XP_010113408.1;hypothetical protein L484_026741 [Morus notabilis]	8.5	GGAGGACAUGGUUACCCUCCA&UAGAGGGUCCCCAUGUUCUCA	NA	NA
ahy-miR3508	XM_016095212.2	gi|703163664|ref|XP_010113408.1;hypothetical protein L484_026741 [Morus notabilis]	6.5	UGAUAAUAUGGGGAUCCUUGA&UAGAGGGUCCCCAUGUUCUCA	NA	NA
ahy-miR3508	XM_016098705.2	gi|356511389|ref|XP_003524409.1;PREDICTED: probable pectinesterase 53 [Glycine max]	9	GAAGGGCAUGGGGUCCCUUCU&UAGAGGGUCCCCAUGUUCUCA	GO:0071555(cell wall organization);GO:0045229(external encapsulating structure organization);GO:0005618(cell wall);GO:0030312(external encapsulating structure);GO:0042545(cell wall modification);GO:0009987(cellular process);GO:0009057(macromolecule catabolic process);GO:0016043(cellular component organization);GO:0043170(macromolecule metabolic process);GO:1901575(organic substance catabolic proc…	ko00040(Pentose and glucuronate interconversions);ko01100(Metabolic pathways)
ahy-miR3508	XM_016098722.2	gi|595806551|ref|XP_007202464.1;hypothetical protein PRUPE_ppa010130mg [Prunus persica]	17.5	UGAGAGCGUGGGGCAAGUGGGUCUCUG&UAGAGGGU------CCCCAUGUUCUCA	GO:0009058(biosynthetic process);GO:0034654(nucleobase-containing compound biosynthetic process);GO:0009059(macromolecule biosynthetic process);GO:0046483(heterocycle metabolic process);GO:0009987(cellular process);GO:0008152(metabolic process);GO:0044238(primary metabolic process);GO:0097659(nucleic acid-templated transcription);GO:0016070(RNA metabolic process);GO:0006807(nitrogen compound meta…	NA
ahy-miR3508	XM_016099734.2	gi|593785713|ref|XP_007155897.1;hypothetical protein PHAVU_003G241200g [Phaseolus vulgaris];gi|388501998|gb|AFK39065.1;unknown [Lotus japonicus]	10.5	AGAGAGC-UGGGGAUCCAUUU&UAGAGGGUCCCCAUGUUCUCA	GO:0046872(metal ion binding);GO:0008152(metabolic process);GO:0005488(binding);GO:0043169(cation binding);GO:0055114(oxidation-reduction process);GO:0046914(transition metal ion binding);GO:0016491(oxidoreductase activity);GO:0003824(catalytic activity);GO:0005506(iron ion binding);GO:0043167(ion binding)	ko01100(Metabolic pathways);ko00904(Diterpenoid biosynthesis);ko01110(Biosynthesis of secondary metabolites)
ahy-miR3508	XM_016100830.2	gi|920712563|gb|KOM53812.1;hypothetical protein LR48_Vigan09g247100 [Vigna angularis]	3.5	UGAGGACAUGGGGUCCUUCUA&UAGAGGGUCCCCAUGUUCUCA	NA	ko00350(Tyrosine metabolism);ko00950(Isoquinoline alkaloid biosynthesis);ko01110(Biosynthesis of secondary metabolites);ko01100(Metabolic pathways)
ahy-miR3508	XM_016100832.2	gi|920712563|gb|KOM53812.1;hypothetical protein LR48_Vigan09g247100 [Vigna angularis]	3.5	GGAGGACAUGGGGUCCCUCUA&UAGAGGGUCCCCAUGUUCUCA	GO:0008152(metabolic process)	ko01100(Metabolic pathways);ko01110(Biosynthesis of secondary metabolites);ko00350(Tyrosine metabolism);ko00950(Isoquinoline alkaloid biosynthesis)
ahy-miR3508	XM_016101495.2	gi|929652374|gb|ALF12286.1;polyphenol oxidase [Morus alba var. multicaulis]	4.5	UGAGGACAUGGGAGCUCUCUA&UAGAGGGUCCCCAUGUUCUCA	NA	ko01110(Biosynthesis of secondary metabolites);ko01100(Metabolic pathways);ko00950(Isoquinoline alkaloid biosynthesis);ko00350(Tyrosine metabolism)
ahy-miR3508	XM_016106634.2	gi|356531846|ref|XP_003534487.1;PREDICTED: acyl-coenzyme A thioesterase 9, mitochondrial [Glycine max]	14.5	AGAGAGCAGUAUAGGGACCCUUGG&UAGAGGGUCCC---CAUGUUCUCA	GO:0003824(catalytic activity);GO:0016787(hydrolase activity)	NA
ahy-miR3508	XM_016113494.2	gi|731439754|ref|XP_010646725.1;PREDICTED: protein FAR1-RELATED SEQUENCE 5-like [Vitis vinifera];gi|147765294|emb|CAN77889.1;hypothetical protein VITISV_003778 [Vitis vinifera]	9	UGGGAACGAUUGGGGUACCCUUGU&UAGAGGGU-CCCCA--UGUUCUCA	NA	NA
ahy-miR3508	XM_016115739.2	gi|593797222|ref|XP_007161649.1;hypothetical protein PHAVU_001G087000g [Phaseolus vulgaris]	6.5	AGAGUGACAAGGGGAUGCUCUA&UAGAGGGUCCCCAUGUU-CUCA	NA	ko04075(Plant hormone signal transduction)
ahy-miR3508	XM_021125414.1	gi|764537226|ref|XP_011458839.1;PREDICTED: homeobox protein knotted-1-like 3 isoform X2 [Fragaria vesca subsp. vesca];gi|965662418|dbj|BAT78127.1;hypothetical protein VIGAN_02076800 [Vigna angularis var. angularis];gi|955364145|ref|XP_014622540.1;PREDICTED: homeobox protein knotted-1-like 3 isoform X2 [Glycine max];gi|764537220|ref|XP_011458838.1;PREDICTED: homeobox protein knotted-1-like 3 isofo…	12.5	AGAUAGCAUGGGGUUUGGCCCUCUU&UAGAGGGU----CCCCAUGUUCUCA	NA	NA
ahy-miR3508	XM_021126392.1	gi|731439754|ref|XP_010646725.1;PREDICTED: protein FAR1-RELATED SEQUENCE 5-like [Vitis vinifera];gi|147765294|emb|CAN77889.1;hypothetical protein VITISV_003778 [Vitis vinifera]	9	UGGGAACGAUUGGGGUACCCUUGU&UAGAGGGU-CCCCA--UGUUCUCA	NA	NA
ahy-miR3508	XM_021129210.1	gi|734416992|gb|KHN38709.1;Shugoshin-1 [Glycine soja]	7.5	AAAGGACAAAGGGGAGCCUCUA&UAGAGGGUCCCC-AUGUUCUCA	NA	NA
ahy-miR3508	XM_021132806.1	gi|356555113|ref|XP_003545882.1;PREDICTED: polyphenol oxidase A1, chloroplastic-like [Glycine max]	4.5	CGAGGACAUGGGGACAUUCUA&UAGAGGGUCCCCAUGUUCUCA	GO:0008152(metabolic process);GO:0016679(oxidoreductase activity, acting on diphenols and related substances as donors);GO:0042440(pigment metabolic process);GO:0046872(metal ion binding);GO:0043169(cation binding);GO:0016491(oxidoreductase activity);GO:0046148(pigment biosynthetic process);GO:0055114(oxidation-reduction process);GO:0043167(ion binding);GO:0003824(catalytic activity);GO:0005488(b…	ko00350(Tyrosine metabolism);ko01110(Biosynthesis of secondary metabolites);ko00950(Isoquinoline alkaloid biosynthesis);ko01100(Metabolic pathways)
ahy-miR3508	XM_021133848.1	gi|571472073|ref|XP_006585488.1;PREDICTED: UDP-glucose:glycoprotein glucosyltransferase-like [Glycine max]	6	CUAGAACAUGGGCGCCCUCUU&UAGAGGGUCCCCAUGUUCUCA	GO:0044267(cellular protein metabolic process);GO:0006486(protein glycosylation);GO:0016757(transferase activity, transferring glycosyl groups);GO:0046483(heterocycle metabolic process);GO:0016740(transferase activity);GO:0009100(glycoprotein metabolic process);GO:0009987(cellular process);GO:0044260(cellular macromolecule metabolic process);GO:0034641(cellular nitrogen compound metabolic process…	ko04141(Protein processing in endoplasmic reticulum)
ahy-miR3508	XM_021136163.1	gi|571440886|ref|XP_006575285.1;PREDICTED: uncharacterized protein LOC100793152 [Glycine max]	13	GGAGGACUUGGGGACAAAUUCCUCUG&UAGAGG-----GUCCCCAUGUUCUCA	NA	ko04141(Protein processing in endoplasmic reticulum)
ahy-miR3508	XM_021143971.1	gi|593783487|ref|XP_007154784.1;hypothetical protein PHAVU_003G147700g [Phaseolus vulgaris];gi|357479735|ref|XP_003610153.1;xyloglucan endotransglucosylase/hydrolase family protein [Medicago truncatula];gi|728808275|gb|KHF98175.1;putative xyloglucan endotransglucosylase/hydrolase 23 -like protein [Gossypium arboreum];gi|388518287|gb|AFK47205.1;unknown [Lotus japonicus]	8.5	AGAGAGCAUGGGUGUCCC-CUU&UAGAGGGUC-CCCAUGUUCUCA	GO:0071555(cell wall organization);GO:0016762(xyloglucan:xyloglucosyl transferase activity);GO:0009987(cellular process);GO:0016757(transferase activity, transferring glycosyl groups);GO:0016787(hydrolase activity);GO:0044238(primary metabolic process);GO:0005576(extracellular region);GO:0016043(cellular component organization);GO:0010411(xyloglucan metabolic process);GO:0016758(transferase activ…	ko04075(Plant hormone signal transduction)
ahy-miR3508	BGI_novel_T000307	gi|571439840|ref|XP_006574971.1;PREDICTED: transcription factor bHLH49 isoform X1 [Glycine max];gi|571434393|ref|XP_006573184.1;PREDICTED: transcription factor bHLH49-like isoform X1 [Glycine max]	6.5	AGGGAACA-GGGGAUGCUCUU&UAGAGGGUCCCCAUGUUCUCA	GO:0046983(protein dimerization activity);GO:0005488(binding);GO:0005515(protein binding)	ko04075(Plant hormone signal transduction);ko04141(Protein processing in endoplasmic reticulum);ko04712(Circadian rhythm - plant)
ahy-miR3508	BGI_novel_T001337	gi|502151879|ref|XP_004508658.1;PREDICTED: ABC transporter B family member 25 [Cicer arietinum]	16	GGAGAGCGUGGGGUACGGCUUUCGG&UAGAGGGU----CCCCAUGUUCUCA	GO:0032555(purine ribonucleotide binding);GO:0030554(adenyl nucleotide binding);GO:0055085(transmembrane transport);GO:0043167(ion binding);GO:0043168(anion binding);GO:0036094(small molecule binding);GO:0035639(purine ribonucleoside triphosphate binding);GO:0005215(transporter activity);GO:0043492(ATPase activity, coupled to movement of substances);GO:0032559(adenyl ribonucleotide binding);GO:00…	ko02010(ABC transporters)
ahy-miR3508	BGI_novel_T002714	gi|449446698|ref|XP_004141108.1;PREDICTED: anaphase-promoting complex subunit 10 [Cucumis sativus];gi|593699342|ref|XP_007150136.1;hypothetical protein PHAVU_005G129800g [Phaseolus vulgaris];gi|965659043|dbj|BAT75462.1;hypothetical protein VIGAN_01332900 [Vigna angularis var. angularis];gi|502083758|ref|XP_004487555.1;PREDICTED: uncharacterized protein LOC101496252 [Cicer arietinum]	8	UAAGAACUAGGGGGCCCUCCA&UAGAGGGUCCCCAUGUUCUCA	GO:0050789(regulation of biological process);GO:0009987(cellular process);GO:0010498(proteasomal protein catabolic process);GO:0044265(cellular macromolecule catabolic process);GO:0043226(organelle);GO:0005634(nucleus);GO:0010965(regulation of mitotic sister chromatid separation);GO:0043170(macromolecule metabolic process);GO:0050794(regulation of cellular process);GO:1901565(organonitrogen compo…	ko04120(Ubiquitin mediated proteolysis)
ahy-miR3508	BGI_novel_T004554	gi|356556525|ref|XP_003546575.1;PREDICTED: protein MEI2-like 5 [Glycine max]	12	AGAGAACAAUGGGGGCCAAGCU&UAGAGGGUCCCCAU-GUUCUCA	GO:0003676(nucleic acid binding);GO:0036094(small molecule binding);GO:0097159(organic cyclic compound binding);GO:1901265(nucleoside phosphate binding);GO:0000166(nucleotide binding);GO:0005488(binding);GO:1901363(heterocyclic compound binding)	ko03040(Spliceosome)
ahy-miR3508	BGI_novel_T006893	gi|734397078|gb|KHN29943.1;Protease 2 [Glycine soja];gi|571439821|ref|XP_006574967.1;PREDICTED: protease 2 [Glycine max];gi|357488089|ref|XP_003614332.1;prolyl oligopeptidase family protein [Medicago truncatula];gi|947122796|gb|KRH71002.1;hypothetical protein GLYMA_02G123100 [Glycine max]	9.5	CCGGAGCGUUGGGGACCCUGGA&UAGAGGGUCCCCA-UGUUCUCA	GO:0043231(intracellular membrane-bounded organelle);GO:0004252(serine-type endopeptidase activity);GO:0005623(cell);GO:0019538(protein metabolic process);GO:0008152(metabolic process);GO:1901564(organonitrogen compound metabolic process);GO:0005622(intracellular);GO:0070011(peptidase activity, acting on L-amino acid peptides);GO:0017171(serine hydrolase activity);GO:0006807(nitrogen compound met…	NA
ahy-miR3508	BGI_novel_T008036	gi|356503527|ref|XP_003520559.1;PREDICTED: protein HUA2-LIKE 2-like [Glycine max];gi|947045855|gb|KRG95484.1;hypothetical protein GLYMA_19G153900 [Glycine max]	8.5	GGAGGAGAUGGGGAUGCCUCAC&UAGAGG-GUCCCCAUGUUCUCA	NA	ko00590(Arachidonic acid metabolism);ko00480(Glutathione metabolism)
ahy-miR3508	BGI_novel_T010630	gi|734416992|gb|KHN38709.1;Shugoshin-1 [Glycine soja]	7.5	AAAGGACAAAGGGGAGCCUCUA&UAGAGGGUCCCC-AUGUUCUCA	NA	NA
ahy-miR3508	BGI_novel_T012242	-	11	GGAGGAGGUGGGGAUCCGCCG&UAGAGGGUCCCCAUGUUCUCA	NA	NA
ahy-miR3508	BGI_novel_T012526	gi|571484965|ref|XP_006589704.1;PREDICTED: protein RNA-directed DNA methylation 3-like isoform X1 [Glycine max];gi|955347597|ref|XP_014618911.1;PREDICTED: protein RNA-directed DNA methylation 3-like isoform X2 [Glycine max]	8.5	GGAGAACGCGGGGGCUUUCGU&UAGAGGGUCCCCAUGUUCUCA	GO:0044451(nucleoplasm part);GO:0006351(transcription, DNA-templated);GO:0044238(primary metabolic process);GO:0097159(organic cyclic compound binding);GO:0005623(cell);GO:0043043(peptide biosynthetic process);GO:0051171(regulation of nitrogen compound metabolic process);GO:0043233(organelle lumen);GO:0043603(cellular amide metabolic process);GO:0070013(intracellular organelle lumen);GO:0044422(o…	NA
ahy-miR3508	XM_016076587.2	gi|593524513|ref|XP_007142217.1;hypothetical protein PHAVU_008G262000g [Phaseolus vulgaris]	19	UGGGAGCAUGGGAAGCUUUGGUCCCUCUC&UAGAGGG-UC-------CCCAUGUUCUCA	GO:0016021(integral component of membrane);GO:0008152(metabolic process);GO:0016758(transferase activity, transferring hexosyl groups);GO:0016020(membrane);GO:0031224(intrinsic component of membrane);GO:0016740(transferase activity);GO:0016757(transferase activity, transferring glycosyl groups);GO:0044425(membrane part);GO:0003824(catalytic activity)	ko00940(Phenylpropanoid biosynthesis);ko00942(Anthocyanin biosynthesis)
ahy-miR3508	XM_016077259.2	gi|356508404|ref|XP_003522947.1;PREDICTED: glucan endo-1,3-beta-D-glucosidase-like [Glycine max]	6	UGAG-AC-UGGGUGGCCCUCUC&UAGAGGGUC-CCCAUGUUCUCA	GO:0071944(cell periphery);GO:0031224(intrinsic component of membrane);GO:0005975(carbohydrate metabolic process);GO:0016020(membrane);GO:0071704(organic substance metabolic process);GO:0044238(primary metabolic process);GO:0016798(hydrolase activity, acting on glycosyl bonds);GO:0046658(anchored component of plasma membrane);GO:0003824(catalytic activity);GO:0005623(cell);GO:0031226(intrinsic co…	ko00500(Starch and sucrose metabolism)
ahy-miR3508	XM_016079985.2	gi|502177769|ref|XP_004516114.1;PREDICTED: fasciclin-like arabinogalactan protein 1, partial [Cicer arietinum]	10.5	CGAGAAUAACGGCGGGGCCCUCUC&UAGAGGGUCCC-C--AUGUUCUCA	NA	NA
ahy-miR3508	XM_016080385.2	gi|356543584|ref|XP_003540240.1;PREDICTED: protein SUPPRESSOR OF K(+) TRANSPORT GROWTH DEFECT 1-like [Glycine max]	5.5	UGAGGGGAUGUGGACCCUUUG&UAGAGGGUCCCCAUGUUCUCA	GO:0005524(ATP binding);GO:0030554(adenyl nucleotide binding);GO:0032553(ribonucleotide binding);GO:0031122(cytoplasmic microtubule organization);GO:0097367(carbohydrate derivative binding);GO:0043231(intracellular membrane-bounded organelle);GO:0000226(microtubule cytoskeleton organization);GO:0016887(ATPase activity);GO:0016787(hydrolase activity);GO:0000166(nucleotide binding);GO:0007033(vacuo…	ko04144(Endocytosis)
ahy-miR3508	XM_016087111.2	gi|922405599|ref|XP_013469565.1;cytochrome P450 family protein [Medicago truncatula]	11	GGAGGACGUGGUGGACCCGGAG&UAGAGGGUCC-CCAUGUUCUCA	GO:0016491(oxidoreductase activity);GO:1901363(heterocyclic compound binding);GO:0043167(ion binding);GO:0008152(metabolic process);GO:0031224(intrinsic component of membrane);GO:0055114(oxidation-reduction process);GO:0003824(catalytic activity);GO:0044425(membrane part);GO:0097159(organic cyclic compound binding);GO:0016020(membrane);GO:0005488(binding);GO:0046906(tetrapyrrole binding);GO:00167…	NA
ahy-miR3508	XM_016087603.2	gi|502078227|ref|XP_004485878.1;PREDICTED: GDSL esterase/lipase At1g28610-like [Cicer arietinum]	7.5	UGAGAAGAUGGGGUUCCCACUG&UAGAGGG-UCCCCAUGUUCUCA	GO:0016491(oxidoreductase activity);GO:0003824(catalytic activity);GO:0016787(hydrolase activity)	ko00901(Indole alkaloid biosynthesis);ko01110(Biosynthesis of secondary metabolites)
ahy-miR3508	XM_016088157.2	gi|502151879|ref|XP_004508658.1;PREDICTED: ABC transporter B family member 25 [Cicer arietinum]	16	GGAGAGCGUGGGGUACGGCUUUCGG&UAGAGGGU----CCCCAUGUUCUCA	GO:0032555(purine ribonucleotide binding);GO:0030554(adenyl nucleotide binding);GO:0055085(transmembrane transport);GO:0043167(ion binding);GO:0043168(anion binding);GO:0036094(small molecule binding);GO:0035639(purine ribonucleoside triphosphate binding);GO:0005215(transporter activity);GO:0043492(ATPase activity, coupled to movement of substances);GO:0032559(adenyl ribonucleotide binding);GO:00…	ko02010(ABC transporters)
ahy-miR3508	XM_016090593.2	gi|356550929|ref|XP_003543834.1;PREDICTED: pectinesterase 31-like [Glycine max]	4.5	GAAGACCAUGGGGACCCUUUG&UAGAGGGUCCCCAUGUUCUCA	GO:0044464(cell part);GO:0030312(external encapsulating structure);GO:0030599(pectinesterase activity);GO:0045490(pectin catabolic process);GO:0045488(pectin metabolic process);GO:0043170(macromolecule metabolic process);GO:0016052(carbohydrate catabolic process);GO:0016788(hydrolase activity, acting on ester bonds);GO:0009987(cellular process);GO:0005623(cell);GO:0016787(hydrolase activity);GO:0…	ko01100(Metabolic pathways);ko00040(Pentose and glucuronate interconversions)
ahy-miR3508	XM_016095169.2	gi|356496364|ref|XP_003517038.1;PREDICTED: UDP-glucuronate 4-epimerase 3 [Glycine max]	9	CGGGGAGAUGGGG-UCCUCGG&UAGAGGGUCCCCAUGUUCUCA	GO:0016021(integral component of membrane);GO:0005975(carbohydrate metabolic process);GO:0050662(coenzyme binding);GO:0005488(binding);GO:0048037(cofactor binding);GO:0044238(primary metabolic process);GO:0016020(membrane);GO:0008152(metabolic process);GO:0003824(catalytic activity);GO:0071704(organic substance metabolic process);GO:0016857(racemase and epimerase activity, acting on carbohydrates…	ko01100(Metabolic pathways);ko00520(Amino sugar and nucleotide sugar metabolism)
ahy-miR3508	XM_016095668.2	gi|965609211|dbj|BAT95702.1;hypothetical protein VIGAN_08247300 [Vigna angularis var. angularis]	8	GGAGAACAUGUGGGACCUUUCA&UAGAGGGUCCC-CAUGUUCUCA	GO:0016021(integral component of membrane);GO:0044425(membrane part);GO:0031224(intrinsic component of membrane);GO:0016020(membrane)	ko00520(Amino sugar and nucleotide sugar metabolism);ko01100(Metabolic pathways)
ahy-miR3508	XM_016102603.2	gi|356556525|ref|XP_003546575.1;PREDICTED: protein MEI2-like 5 [Glycine max]	12	AGAGAACAAUGGGGGCCAAGCU&UAGAGGGUCCCCAU-GUUCUCA	GO:0003676(nucleic acid binding);GO:0036094(small molecule binding);GO:0097159(organic cyclic compound binding);GO:1901265(nucleoside phosphate binding);GO:0000166(nucleotide binding);GO:0005488(binding);GO:1901363(heterocyclic compound binding)	ko03040(Spliceosome)
ahy-miR3508	XM_016104068.2	gi|734351697|gb|KHN12886.1;Glucan endo-1,3-beta-glucosidase, basic isoform [Glycine soja];gi|593331147|ref|XP_007139000.1;hypothetical protein PHAVU_009G256400g [Phaseolus vulgaris]	8.5	UGAGAGC--GGGUGGCCCUCAA&UAGAGGGUC-CCCAUGUUCUCA	GO:0004553(hydrolase activity, hydrolyzing O-glycosyl compounds);GO:0005975(carbohydrate metabolic process);GO:0044238(primary metabolic process);GO:0008152(metabolic process);GO:0016798(hydrolase activity, acting on glycosyl bonds);GO:0071704(organic substance metabolic process);GO:0016787(hydrolase activity);GO:0003824(catalytic activity)	ko00500(Starch and sucrose metabolism)
ahy-miR3508	XM_016107772.2	gi|502162393|ref|XP_004512487.1;PREDICTED: lysine-specific demethylase JMJ706 isoform X1 [Cicer arietinum]	7	CGAGAAUGUGGGGAGCCUCGU&UAGAGGGUCCCCAUGUUCUCA	NA	NA
ahy-miR3508	XM_016109021.2	gi|502176326|ref|XP_004515848.1;PREDICTED: BTB/POZ and TAZ domain-containing protein 2-like [Cicer arietinum]	7.5	GGAGAACGUGGUGGACCUGCUU&UAGAGGGUCC-CCAUGUUCUCA	GO:0004402(histone acetyltransferase activity);GO:0000989(transcription factor activity, transcription factor binding);GO:0060255(regulation of macromolecule metabolic process);GO:0006475(internal protein amino acid acetylation);GO:0016569(covalent chromatin modification);GO:0044267(cellular protein metabolic process);GO:0003712(transcription cofactor activity);GO:0016407(acetyltransferase activi…	NA
ahy-miR3508	XM_016111592.2	gi|728829017|gb|KHG08460.1;putative ubiquinone biosynthesis UbiB [Gossypium arboreum]	11	AGAGGACGGGCAGGGGAUCCUCUU&UAGAGGGUCCCC---AUGUUCUCA	NA	ko00500(Starch and sucrose metabolism)
ahy-miR3508	XM_016113796.2	gi|356503527|ref|XP_003520559.1;PREDICTED: protein HUA2-LIKE 2-like [Glycine max];gi|947045855|gb|KRG95484.1;hypothetical protein GLYMA_19G153900 [Glycine max]	8.5	GGAGGAGAUGGGGAUGCCUCAC&UAGAGG-GUCCCCAUGUUCUCA	NA	ko00590(Arachidonic acid metabolism);ko00480(Glutathione metabolism)
ahy-miR3508	XM_016116577.2	gi|764537226|ref|XP_011458839.1;PREDICTED: homeobox protein knotted-1-like 3 isoform X2 [Fragaria vesca subsp. vesca];gi|965662418|dbj|BAT78127.1;hypothetical protein VIGAN_02076800 [Vigna angularis var. angularis];gi|955364145|ref|XP_014622540.1;PREDICTED: homeobox protein knotted-1-like 3 isoform X2 [Glycine max];gi|764537220|ref|XP_011458838.1;PREDICTED: homeobox protein knotted-1-like 3 isofo…	12.5	AGAUAGCAUGGGGUUUGGCCCUCUU&UAGAGGGU----CCCCAUGUUCUCA	NA	NA
ahy-miR3508	XM_021125413.1	gi|764537226|ref|XP_011458839.1;PREDICTED: homeobox protein knotted-1-like 3 isoform X2 [Fragaria vesca subsp. vesca];gi|965662418|dbj|BAT78127.1;hypothetical protein VIGAN_02076800 [Vigna angularis var. angularis];gi|955364145|ref|XP_014622540.1;PREDICTED: homeobox protein knotted-1-like 3 isoform X2 [Glycine max];gi|764537220|ref|XP_011458838.1;PREDICTED: homeobox protein knotted-1-like 3 isofo…	12.5	AGAUAGCAUGGGGUUUGGCCCUCUU&UAGAGGGU----CCCCAUGUUCUCA	NA	NA
ahy-miR3508	XM_021135414.1	gi|342365835|gb|AEL30368.1;hypothetical protein 205D04_8 [Arachis hypogaea]	19	UGAGAGCAUAUGCCGGCGGGGAACCUCUG&UAGAGGGUCCCC--------AUGUUCUCA	NA	NA
ahy-miR3508	XM_021135415.1	gi|342365835|gb|AEL30368.1;hypothetical protein 205D04_8 [Arachis hypogaea]	19	UGAGAGCAUAUGCCGGCGGGGAACCUCUG&UAGAGGGUCCCC--------AUGUUCUCA	NA	NA
ahy-MIR3510-p5_1ss22GT	XM_016088895.2	gi|502136637|ref|XP_004502764.1;PREDICTED: protein TRANSPARENT TESTA GLABRA 1 [Cicer arietinum]	8	UUCGCUUCAGUCUCCGCU-GAUGG&CCAUCUUGCG-AGACUGAA-CGAU	GO:0048856(anatomical structure development);GO:0032501(multicellular organismal process);GO:0032502(developmental process);GO:0007275(multicellular organism development)	NA
ahy-MIR3510-p5_1ss22GT	XM_016097021.2	gi|356571411|ref|XP_003553870.1;PREDICTED: cytochrome c1-2, heme protein, mitochondrial-like [Glycine max]	6.5	GUCUGUUCUAAAGUCUCGCAAGCUGG&CCAUCUUGCGAGACU---GAAC-GAU	GO:0020037(heme binding);GO:0046906(tetrapyrrole binding);GO:0009055(electron transfer activity);GO:1901363(heterocyclic compound binding);GO:0005488(binding);GO:0097159(organic cyclic compound binding)	ko01100(Metabolic pathways);ko00190(Oxidative phosphorylation)
ahy-MIR3510-p5_1ss22GT	XM_016099536.2	gi|571537389|ref|XP_006600988.1;PREDICTED: uncharacterized protein LOC100818172 isoform X1 [Glycine max];gi|502153079|ref|XP_004509208.1;PREDICTED: uncharacterized protein LOC101497795 [Cicer arietinum]	13	UCAGUUCAGUAUUGCGCGAGGUGG&CCAUCUUGCG--AGACUGAACGAU	NA	NA
ahy-MIR3510-p5_1ss22GT	XM_016105478.2	gi|593702557|ref|XP_007151688.1;hypothetical protein PHAVU_004G067700g [Phaseolus vulgaris];gi|734312466|gb|KHN00644.1;DEAD-box ATP-dependent RNA helicase 41 [Glycine soja]	11	GUCGAUUCUGGUCUCAGGCGCAAGAUGG&CCAUCUUGC----GAGACU-GAA-CGAU	GO:0010501(RNA secondary structure unwinding);GO:0000166(nucleotide binding);GO:0004386(helicase activity);GO:0003824(catalytic activity);GO:1901363(heterocyclic compound binding);GO:1901360(organic cyclic compound metabolic process);GO:0034641(cellular nitrogen compound metabolic process);GO:0008026(ATP-dependent helicase activity);GO:0006725(cellular aromatic compound metabolic process);GO:0043…	NA
ahy-MIR3510-p5_1ss22GT	XM_016085170.2	gi|356562571|ref|XP_003549543.1;PREDICTED: cytochrome b561 and DOMON domain-containing protein At5g47530-like [Glycine max]	4	AUCGUCCACGUCUGGCAAGAUGG&CCAUCUUGCGAGAC-UGAACGAU	GO:0016021(integral component of membrane);GO:0016020(membrane);GO:0044425(membrane part);GO:0008152(metabolic process);GO:0031224(intrinsic component of membrane);GO:0055114(oxidation-reduction process)	NA
ahy-MIR3510-p5_1ss22GT	XM_016087949.2	gi|951045272|ref|XP_014518872.1;PREDICTED: polyadenylate-binding protein 2-like [Vigna radiata var. radiata];gi|593792162|ref|XP_007159120.1;hypothetical protein PHAVU_002G210300g [Phaseolus vulgaris]	15	CUCGUUCAGUCUUUGUAGGCAAUGUGG&CCAUCUUGC-----GAGACUGAACGAU	GO:0000166(nucleotide binding);GO:1901363(heterocyclic compound binding);GO:0036094(small molecule binding);GO:0003676(nucleic acid binding);GO:0097159(organic cyclic compound binding);GO:0005488(binding);GO:1901265(nucleoside phosphate binding)	ko03015(mRNA surveillance pathway)
ahy-MIR3510-p5_1ss22GT	XM_016090067.2	gi|356514729|ref|XP_003526056.1;PREDICTED: F-box/LRR-repeat protein 15-like [Glycine max]	12	UUC-UUCAGUCUUGCAGUAUUGAUGG&CCAUC----UUGCGAGACUGAACGAU	NA	NA
ahy-MIR3510-p5_1ss22GT	XM_016096245.2	gi|590587422|ref|XP_007015960.1;Zinc finger C-x8-C-x5-C-x3-H type family protein [Theobroma cacao]	11	UACGUUCAGUUUCGCGAGGAAG&CCAUCUUGCGAGACUGAACGAU	GO:0044237(cellular metabolic process);GO:0043227(membrane-bounded organelle);GO:0000166(nucleotide binding);GO:0006396(RNA processing);GO:0034641(cellular nitrogen compound metabolic process);GO:1901363(heterocyclic compound binding);GO:0005488(binding);GO:0009987(cellular process);GO:1901265(nucleoside phosphate binding);GO:0008380(RNA splicing);GO:0000375(RNA splicing, via transesterification …	ko03040(Spliceosome)
ahy-MIR3510-p5_1ss22GT	XM_016096247.2	gi|590587422|ref|XP_007015960.1;Zinc finger C-x8-C-x5-C-x3-H type family protein [Theobroma cacao]	11	UACGUUCAGUUUCGCGAGGAAG&CCAUCUUGCGAGACUGAACGAU	GO:0044237(cellular metabolic process);GO:0043227(membrane-bounded organelle);GO:0000166(nucleotide binding);GO:0006396(RNA processing);GO:0034641(cellular nitrogen compound metabolic process);GO:1901363(heterocyclic compound binding);GO:0005488(binding);GO:0009987(cellular process);GO:1901265(nucleoside phosphate binding);GO:0008380(RNA splicing);GO:0000375(RNA splicing, via transesterification …	ko03040(Spliceosome)
ahy-MIR3510-p5_1ss22GT	XM_016101898.2	gi|571455343|ref|XP_006580062.1;PREDICTED: E3 ubiquitin-protein ligase UPL1-like isoform X1 [Glycine max]	10	GUCGUUCAAUGGUUUUGGGAGGUGG&CCAUCUUGCGAGACU---GAACGAU	NA	ko04120(Ubiquitin mediated proteolysis)
ahy-MIR3510-p5_1ss22GT	XM_021132428.1	gi|356514729|ref|XP_003526056.1;PREDICTED: F-box/LRR-repeat protein 15-like [Glycine max]	12	UUC-UUCAGUCUUGCAGUAUUGAUGG&CCAUC----UUGCGAGACUGAACGAU	NA	NA
ahy-MIR3510-p5_1ss22GT	XM_021134218.1	gi|357497049|ref|XP_003618813.1;cytochrome c1, heme protein [Medicago truncatula]	7	UCCGUUCUAAAGUCUCGCAAGCUGG&CCAUCUUGCGAGACU---GAACGAU	GO:1901363(heterocyclic compound binding);GO:0005488(binding);GO:0046906(tetrapyrrole binding);GO:0020037(heme binding);GO:0009055(electron transfer activity);GO:0097159(organic cyclic compound binding)	ko01100(Metabolic pathways);ko00190(Oxidative phosphorylation)
ahy-MIR3513-p3_1ss5AG	BGI_novel_T000909	gi|593783487|ref|XP_007154784.1;hypothetical protein PHAVU_003G147700g [Phaseolus vulgaris];gi|357479735|ref|XP_003610153.1;xyloglucan endotransglucosylase/hydrolase family protein [Medicago truncatula];gi|728808275|gb|KHF98175.1;putative xyloglucan endotransglucosylase/hydrolase 23 -like protein [Gossypium arboreum];gi|388518287|gb|AFK47205.1;unknown [Lotus japonicus]	7.5	AUGCCAACAAUGCAUGCAUCU&UGUUGCAUGUGUUGUUGGUUU	GO:0071555(cell wall organization);GO:0016762(xyloglucan:xyloglucosyl transferase activity);GO:0009987(cellular process);GO:0016757(transferase activity, transferring glycosyl groups);GO:0016787(hydrolase activity);GO:0044238(primary metabolic process);GO:0005576(extracellular region);GO:0016043(cellular component organization);GO:0010411(xyloglucan metabolic process);GO:0016758(transferase activ…	ko04075(Plant hormone signal transduction)
ahy-MIR3513-p3_1ss5AG	BGI_novel_T001033	gi|951009708|ref|XP_014509363.1;PREDICTED: flowering time control protein FCA isoform X1 [Vigna radiata var. radiata];gi|356521753|ref|XP_003529516.1;PREDICTED: flowering time control protein FCA-like isoform X1 [Glycine max]	6	CCACCAUCAACAAAUGCAGCA&UGUUGCAUGUGUUGUUGGUUU	GO:0005488(binding);GO:0003676(nucleic acid binding);GO:0036094(small molecule binding);GO:1901363(heterocyclic compound binding);GO:0097159(organic cyclic compound binding);GO:0003723(RNA binding);GO:1901265(nucleoside phosphate binding);GO:0000166(nucleotide binding)	NA
ahy-MIR3513-p3_1ss5AG	BGI_novel_T001034	gi|951009708|ref|XP_014509363.1;PREDICTED: flowering time control protein FCA isoform X1 [Vigna radiata var. radiata];gi|356521753|ref|XP_003529516.1;PREDICTED: flowering time control protein FCA-like isoform X1 [Glycine max]	6	CCACCAUCAACAAAUGCAGCA&UGUUGCAUGUGUUGUUGGUUU	GO:0005488(binding);GO:0003676(nucleic acid binding);GO:0036094(small molecule binding);GO:1901363(heterocyclic compound binding);GO:0097159(organic cyclic compound binding);GO:0003723(RNA binding);GO:1901265(nucleoside phosphate binding);GO:0000166(nucleotide binding)	NA
ahy-MIR3513-p3_1ss5AG	BGI_novel_T001069	gi|356521817|ref|XP_003529547.1;PREDICTED: WD repeat-containing protein 43-like [Glycine max]	7.5	UUGCCAACAAUAUAUGCUGCA&UGUUGCAUGUGUUGUUGGUUU	NA	ko03008(Ribosome biogenesis in eukaryotes)
ahy-MIR3513-p3_1ss5AG	BGI_novel_T001070	gi|356521817|ref|XP_003529547.1;PREDICTED: WD repeat-containing protein 43-like [Glycine max]	7.5	UUGCCAACAAUAUAUGCUGCA&UGUUGCAUGUGUUGUUGGUUU	NA	ko03008(Ribosome biogenesis in eukaryotes)
ahy-MIR3513-p3_1ss5AG	BGI_novel_T001562	gi|950945716|ref|XP_014494326.1;PREDICTED: GTPase Der isoform X2 [Vigna radiata var. radiata];gi|965603595|dbj|BAT90772.1;hypothetical protein VIGAN_06205700 [Vigna angularis var. angularis]	6	GAACCAGCAG-AC-UGCAACA&UGUUGCAUGUGUUGUUGGUUU	GO:0032555(purine ribonucleotide binding);GO:0043168(anion binding);GO:1901265(nucleoside phosphate binding);GO:0036094(small molecule binding);GO:0032553(ribonucleotide binding);GO:0017076(purine nucleotide binding);GO:0032550(purine ribonucleoside binding);GO:0005488(binding);GO:0019001(guanyl nucleotide binding);GO:0097367(carbohydrate derivative binding);GO:0000166(nucleotide binding);GO:0005…	NA
ahy-MIR3513-p3_1ss5AG	BGI_novel_T001571	gi|645244228|ref|XP_008228334.1;PREDICTED: E3 ubiquitin-protein ligase RNF144B [Prunus mume];gi|951055753|ref|XP_014521574.1;PREDICTED: probable E3 ubiquitin-protein ligase ARI10 [Vigna radiata var. radiata]	10	UUGCCGGCGGCAGAAGCAGCA&UGUUGCAUGUGUUGUUGGUUU	GO:0030162(regulation of proteolysis);GO:0005515(protein binding);GO:0051171(regulation of nitrogen compound metabolic process);GO:0042787(protein ubiquitination involved in ubiquitin-dependent protein catabolic process);GO:0051173(positive regulation of nitrogen compound metabolic process);GO:1902494(catalytic complex);GO:0050794(regulation of cellular process);GO:0009987(cellular process);GO:00…	NA
ahy-MIR3513-p3_1ss5AG	BGI_novel_T001572	gi|645244228|ref|XP_008228334.1;PREDICTED: E3 ubiquitin-protein ligase RNF144B [Prunus mume];gi|951055753|ref|XP_014521574.1;PREDICTED: probable E3 ubiquitin-protein ligase ARI10 [Vigna radiata var. radiata]	10	UUGCCGGCGGCAGAAGCAGCA&UGUUGCAUGUGUUGUUGGUUU	GO:0030162(regulation of proteolysis);GO:0005515(protein binding);GO:0051171(regulation of nitrogen compound metabolic process);GO:0042787(protein ubiquitination involved in ubiquitin-dependent protein catabolic process);GO:0051173(positive regulation of nitrogen compound metabolic process);GO:1902494(catalytic complex);GO:0050794(regulation of cellular process);GO:0009987(cellular process);GO:00…	NA
ahy-MIR3513-p3_1ss5AG	BGI_novel_T001704	gi|502108917|ref|XP_004493520.1;PREDICTED: putative pentatricopeptide repeat-containing protein At5g52630 [Cicer arietinum];gi|593798406|ref|XP_007162241.1;hypothetical protein PHAVU_001G135800g [Phaseolus vulgaris];gi|965670675|dbj|BAT85282.1;hypothetical protein VIGAN_04281100 [Vigna angularis var. angularis];gi|590636314|ref|XP_007028824.1;Mitochondrial RNAediting factor 1 [Theobroma cacao];gi…	10	UCGCCGGCGGCAGAAGCAACU&UGUUGCAUGUGUUGUUGGUUU	GO:0006807(nitrogen compound metabolic process);GO:0008152(metabolic process);GO:1901360(organic cyclic compound metabolic process);GO:0044238(primary metabolic process);GO:0043169(cation binding);GO:0016070(RNA metabolic process);GO:0071704(organic substance metabolic process);GO:0043167(ion binding);GO:0043170(macromolecule metabolic process);GO:0016553(base conversion or substitution editing);…	ko03440(Homologous recombination)
ahy-MIR3513-p3_1ss5AG	BGI_novel_T001803	gi|727644876|ref|XP_010493474.1;PREDICTED: 50S ribosomal protein L24, chloroplastic-like [Camelina sativa];gi|823202525|ref|XP_012435845.1;PREDICTED: 50S ribosomal protein L24, chloroplastic [Gossypium raimondii];gi|590717151|ref|XP_007050544.1;KOW domain-containing protein [Theobroma cacao]	10	UCGCCGGCGGCAGAAGCAACU&UGUUGCAUGUGUUGUUGGUUU	GO:1901566(organonitrogen compound biosynthetic process);GO:1990904(ribonucleoprotein complex);GO:0009058(biosynthetic process);GO:0043232(intracellular non-membrane-bounded organelle);GO:0005737(cytoplasm);GO:0006518(peptide metabolic process);GO:0044267(cellular protein metabolic process);GO:0005623(cell);GO:0005198(structural molecule activity);GO:0034645(cellular macromolecule biosynthetic pr…	ko03010(Ribosome)
ahy-MIR3513-p3_1ss5AG	BGI_novel_T001879	-	9.5	AAGCCAACU-CACAAGAUGCAACA&UGUUGCA---UGUGUUGUUGGUUU	GO:0044424(intracellular part);GO:0005737(cytoplasm);GO:0071840(cellular component organization or biogenesis);GO:0140030(modification-dependent protein binding);GO:0044257(cellular protein catabolic process);GO:0043227(membrane-bounded organelle);GO:0006508(proteolysis);GO:0005622(intracellular);GO:0043170(macromolecule metabolic process);GO:1902494(catalytic complex);GO:0010498(proteasomal prot…	ko03050(Proteasome)
ahy-MIR3513-p3_1ss5AG	BGI_novel_T002317	gi|593264890|ref|XP_007134623.1;hypothetical protein PHAVU_010G062400g [Phaseolus vulgaris];gi|922365075|ref|XP_013454783.1;F-box/LRR protein [Medicago truncatula]	11	UCGCUAGCCGGCGCGUGCGGCC&UGUUGCAUGUGUUG-UUGGUUU	NA	NA
ahy-MIR3513-p3_1ss5AG	BGI_novel_T002679	gi|734416918|gb|KHN38635.1;hypothetical protein glysoja_008184 [Glycine soja]	4.5	CAGCCAGUAAUACAUGUAACA&UGUUGCAUGUGUUGUUGGUUU	NA	NA
ahy-MIR3513-p3_1ss5AG	BGI_novel_T002858	gi|502145345|ref|XP_004505991.1;PREDICTED: uncharacterized protein LOC101512970 [Cicer arietinum]	10	AAGCCAACGACACAUGGUUCU&UGUUGCAUGUGUUGUUGGUUU	NA	NA
ahy-MIR3513-p3_1ss5AG	BGI_novel_T002883	gi|951067674|ref|XP_014524330.1;PREDICTED: probable transcription factor PosF21 [Vigna radiata var. radiata]	7	CCACCAACAGCAACA-GCAACA&UGUUGCAUGU-GUUGUUGGUUU	GO:0043231(intracellular membrane-bounded organelle);GO:0003677(DNA binding);GO:0005623(cell);GO:0043226(organelle);GO:0003676(nucleic acid binding);GO:0005488(binding);GO:0005622(intracellular);GO:0043229(intracellular organelle);GO:0097159(organic cyclic compound binding);GO:0044424(intracellular part);GO:0044464(cell part);GO:0043227(membrane-bounded organelle);GO:0005634(nucleus);GO:0003700(D…	ko04016(MAPK signaling pathway - plant)
ahy-MIR3513-p3_1ss5AG	BGI_novel_T003145	gi|502143997|ref|XP_004505542.1;PREDICTED: 26S proteasome non-ATPase regulatory subunit 2 homolog A [Cicer arietinum];gi|357474441|ref|XP_003607505.1;26S proteasome regulatory subunit S2 1B [Medicago truncatula]	11.5	UCACCGACAGCACUUGCUGGACU&UGUU--GCAUGUGUUGUUGGUUU	GO:0006807(nitrogen compound metabolic process);GO:0005622(intracellular);GO:1905369(endopeptidase complex);GO:0044445(cytosolic part);GO:0030234(enzyme regulator activity);GO:0019538(protein metabolic process);GO:0042176(regulation of protein catabolic process);GO:0044265(cellular macromolecule catabolic process);GO:0043229(intracellular organelle);GO:0044424(intracellular part);GO:0044257(cellu…	ko03050(Proteasome)
ahy-MIR3513-p3_1ss5AG	BGI_novel_T003283	gi|20269127|emb|CAD19990.1;TCP1 protein [Lupinus albus];gi|976926592|gb|KVI10452.1;Transcription factor, TCP [Cynara cardunculus var. scolymus]	22.5	GAACCAGCGGUGGCAGUUGCACAAGCAACA&UGUUGCAUGUGU---------UGUUGGUUU	NA	NA
ahy-MIR3513-p3_1ss5AG	BGI_novel_T003474	gi|593329088|ref|XP_007137971.1;hypothetical protein PHAVU_009G170000g [Phaseolus vulgaris];gi|571461073|ref|XP_003526980.2;PREDICTED: probable UDP-N-acetylglucosamine--peptide N-acetylglucosaminyltransferase SPINDLY isoform X1 [Glycine max]	7	CUACCGAACAAGCACAUGCGAUA&UGUUGCAUGUGUU-GUU-GGUUU	NA	ko00514(Other types of O-glycan biosynthesis)
ahy-MIR3513-p3_1ss5AG	BGI_novel_T003515	gi|702263310|ref|XP_010038066.1;PREDICTED: sterol 3-beta-glucosyltransferase UGT80A2-like [Eucalyptus grandis]	6	AAGCCAGCAACA-AUGCAGGCA&UGU-UGCAUGUGUUGUUGGUUU	NA	NA
ahy-MIR3513-p3_1ss5AG	BGI_novel_T003784	gi|947111581|gb|KRH59907.1;hypothetical protein GLYMA_05G208200 [Glycine max];gi|351724457|ref|NP_001237826.1;uncharacterized protein LOC100305606 [Glycine max];gi|955318769|ref|XP_014630774.1;PREDICTED: uncharacterized protein LOC100305606 isoform X3 [Glycine max];gi|965609214|dbj|BAT95705.1;hypothetical protein VIGAN_08247700 [Vigna angularis var. angularis]	7.5	CCACCAUCGACCACAUGCAAUG&UGUUGCAUGUG-UUGUUGGUUU	GO:0016020(membrane)	ko00564(Glycerophospholipid metabolism);ko01110(Biosynthesis of secondary metabolites);ko01100(Metabolic pathways);ko04070(Phosphatidylinositol signaling system)
ahy-MIR3513-p3_1ss5AG	BGI_novel_T003786	gi|947111581|gb|KRH59907.1;hypothetical protein GLYMA_05G208200 [Glycine max];gi|351724457|ref|NP_001237826.1;uncharacterized protein LOC100305606 [Glycine max];gi|955318769|ref|XP_014630774.1;PREDICTED: uncharacterized protein LOC100305606 isoform X3 [Glycine max];gi|965609214|dbj|BAT95705.1;hypothetical protein VIGAN_08247700 [Vigna angularis var. angularis]	7.5	CCACCAUCGACCACAUGCAAUG&UGUUGCAUGUG-UUGUUGGUUU	GO:0016020(membrane)	ko00564(Glycerophospholipid metabolism);ko01110(Biosynthesis of secondary metabolites);ko01100(Metabolic pathways);ko04070(Phosphatidylinositol signaling system)
ahy-MIR3513-p3_1ss5AG	BGI_novel_T003805	gi|734382531|gb|KHN23663.1;30S ribosomal protein S1 [Glycine soja]	13.5	AGACCAAAUUUGUAUCAGCACAUGCGGGA&UGUUGCAUGUGUUG--------UUGGUUU	GO:1901363(heterocyclic compound binding);GO:0044446(intracellular organelle part);GO:0032040(small-subunit processome);GO:0070013(intracellular organelle lumen);GO:0043229(intracellular organelle);GO:0043232(intracellular non-membrane-bounded organelle);GO:0032991(macromolecular complex);GO:0005623(cell);GO:0005488(binding);GO:0043226(organelle);GO:0044464(cell part);GO:0043231(intracellular mem…	NA
ahy-MIR3513-p3_1ss5AG	BGI_novel_T004007	gi|571466829|ref|XP_003528401.2;PREDICTED: L-type lectin-domain containing receptor kinase IX.1-like [Glycine max];gi|502077332|ref|XP_004485622.1;PREDICTED: probable cinnamyl alcohol dehydrogenase 1 [Cicer arietinum]	11	AGGCCAACAACACAGGACUAGCA&UGUUG--CAUGUGUUGUUGGUUU	GO:0016740(transferase activity);GO:0008152(metabolic process);GO:0008270(zinc ion binding);GO:0097159(organic cyclic compound binding);GO:1901265(nucleoside phosphate binding);GO:0097367(carbohydrate derivative binding);GO:0044425(membrane part);GO:0016614(oxidoreductase activity, acting on CH-OH group of donors);GO:0036094(small molecule binding);GO:0043167(ion binding);GO:0052747(sinapyl alcoh…	ko00940(Phenylpropanoid biosynthesis);ko01110(Biosynthesis of secondary metabolites);ko01100(Metabolic pathways)
ahy-MIR3513-p3_1ss5AG	BGI_novel_T004623	gi|593690759|ref|XP_007145949.1;hypothetical protein PHAVU_006G000200g [Phaseolus vulgaris]	9.5	GUUCCAGCAGC-UAUGCGACU&UGUUGCAUGUGUUGUUGGUUU	NA	NA
ahy-MIR3513-p3_1ss5AG	BGI_novel_T004705	gi|593696127|ref|XP_007148562.1;hypothetical protein PHAVU_006G219000g [Phaseolus vulgaris]	12	UAGCCAGCAACACG-GCUUUGACA&UGUU---GCAUGUGUUGUUGGUUU	NA	ko03008(Ribosome biogenesis in eukaryotes)
ahy-MIR3513-p3_1ss5AG	BGI_novel_T004746	gi|950996436|ref|XP_014505730.1;PREDICTED: SWI/SNF-related matrix-associated actin-dependent regulator of chromatin subfamily A-like protein 1 isoform X2 [Vigna radiata var. radiata];gi|947070574|gb|KRH19465.1;hypothetical protein GLYMA_13G118200 [Glycine max];gi|947053037|gb|KRH02490.1;hypothetical protein GLYMA_17G041700 [Glycine max];gi|955357174|ref|XP_014620946.1;PREDICTED: SWI/SNF-related m…	7.5	CAGCCAAUGAUAGAUGCGAUA&UGUUGCAUGUGUUGUUGGUUU	GO:0032553(ribonucleotide binding);GO:1901265(nucleoside phosphate binding);GO:0017076(purine nucleotide binding);GO:0000166(nucleotide binding);GO:0043168(anion binding);GO:0030554(adenyl nucleotide binding);GO:0005524(ATP binding);GO:0005488(binding);GO:0036094(small molecule binding);GO:0097367(carbohydrate derivative binding);GO:1901363(heterocyclic compound binding);GO:0035639(purine ribonuc…	NA
ahy-MIR3513-p3_1ss5AG	BGI_novel_T004845	gi|502079291|ref|XP_004486214.1;PREDICTED: transcription initiation factor IIF subunit alpha [Cicer arietinum];gi|593694278|ref|XP_007147660.1;hypothetical protein PHAVU_006G143600g [Phaseolus vulgaris];gi|965600349|dbj|BAT87527.1;hypothetical protein VIGAN_05090900 [Vigna angularis var. angularis]	14.5	AAACCAGCAGCAGCAGGGGCAACU&UGUUGC---AUGUGUUGUUGGUUU	GO:0043226(organelle);GO:0005623(cell);GO:0031224(intrinsic component of membrane);GO:0031328(positive regulation of cellular biosynthetic process);GO:0010628(positive regulation of gene expression);GO:0044424(intracellular part);GO:0043231(intracellular membrane-bounded organelle);GO:0009893(positive regulation of metabolic process);GO:0051252(regulation of RNA metabolic process);GO:0031325(posi…	ko03022(Basal transcription factors)
ahy-MIR3513-p3_1ss5AG	BGI_novel_T004931	gi|593693942|ref|XP_007147492.1;hypothetical protein PHAVU_006G129000g [Phaseolus vulgaris]	8.5	AAGCCAACAACACAUGCUGAAAACA&UGUU----GCAUGUGUUGUUGGUUU	GO:0043229(intracellular organelle);GO:0044437(vacuolar part);GO:0043227(membrane-bounded organelle);GO:0005774(vacuolar membrane);GO:0044464(cell part);GO:0044424(intracellular part);GO:0044446(intracellular organelle part);GO:0005773(vacuole);GO:0098588(bounding membrane of organelle);GO:0044444(cytoplasmic part);GO:0044422(organelle part);GO:0031090(organelle membrane);GO:0005623(cell);GO:0016…	NA
ahy-MIR3513-p3_1ss5AG	BGI_novel_T005165	gi|502085327|ref|XP_004487891.1;PREDICTED: uncharacterized protein LOC101504855 [Cicer arietinum]	8.5	AAACCGGCGGC---UGCAACA&UGUUGCAUGUGUUGUUGGUUU	NA	NA
ahy-MIR3513-p3_1ss5AG	BGI_novel_T005396	gi|950971136|ref|XP_014500239.1;PREDICTED: oxysterol-binding protein-related protein 4C-like isoform X1 [Vigna radiata var. radiata]	12	GGACCAACAACGCAAAACCGCAACA&UGUUGC----AUGUGUUGUUGGUUU	NA	NA
ahy-MIR3513-p3_1ss5AG	BGI_novel_T005953	gi|388508922|gb|AFK42527.1;unknown [Lotus japonicus]	9.5	GGGCCAACAUUAUAUGCGAAU&UGUUGCAUGUGUUGUUGGUUU	NA	NA
ahy-MIR3513-p3_1ss5AG	BGI_novel_T005967	gi|502148857|ref|XP_004507297.1;PREDICTED: probable tRNA (guanine(26)-N(2))-dimethyltransferase 1 isoform X3 [Cicer arietinum];gi|502148853|ref|XP_004507295.1;PREDICTED: probable tRNA (guanine(26)-N(2))-dimethyltransferase 1 isoform X1 [Cicer arietinum];gi|502148855|ref|XP_004507296.1;PREDICTED: probable tRNA (guanine(26)-N(2))-dimethyltransferase 1 isoform X2 [Cicer arietinum]	10	UCGCCGGCGGCAGAAGCAACU&UGUUGCAUGUGUUGUUGGUUU	NA	NA
ahy-MIR3513-p3_1ss5AG	BGI_novel_T006014	gi|356499669|ref|XP_003518659.1;PREDICTED: ABC transporter B family member 20-like [Glycine max]	8.5	GUCCCCGCCGCACGUGCAACC&UGUUGCAUGUGUUGUUGGUUU	GO:0042626(ATPase activity, coupled to transmembrane movement of substances);GO:0005524(ATP binding);GO:0097159(organic cyclic compound binding);GO:0032559(adenyl ribonucleotide binding);GO:0051234(establishment of localization);GO:0031224(intrinsic component of membrane);GO:0043167(ion binding);GO:0016020(membrane);GO:0005488(binding);GO:0044425(membrane part);GO:0030554(adenyl nucleotide bindin…	ko02010(ABC transporters)
ahy-MIR3513-p3_1ss5AG	BGI_novel_T006092	gi|658006605|ref|XP_008338471.1;PREDICTED: uncharacterized protein LOC103401535 [Malus domestica];gi|971573765|ref|XP_015170284.1;PREDICTED: LOW QUALITY PROTEIN: histone-lysine N-methyltransferase 2D [Solanum tuberosum];gi|694376965|ref|XP_009364808.1;PREDICTED: uncharacterized protein LOC103954710 [Pyrus x bretschneideri]	8	GCAACAACAGCAGAUGCAGCA&UGUUGCAUGUGUUGUUGGUUU	NA	NA
ahy-MIR3513-p3_1ss5AG	BGI_novel_T006448	gi|593790872|ref|XP_007158475.1;hypothetical protein PHAVU_002G155600g [Phaseolus vulgaris];gi|951052421|ref|XP_014520697.1;PREDICTED: methyl-CpG-binding domain-containing protein 13-like isoform X2 [Vigna radiata var. radiata]	9	AAGCCAGCAGCACACAGGAACC&UGUUGC-AUGUGUUGUUGGUUU	NA	ko00230(Purine metabolism);ko01100(Metabolic pathways);ko03020(RNA polymerase);ko00040(Pentose and glucuronate interconversions);ko00240(Pyrimidine metabolism)
ahy-MIR3513-p3_1ss5AG	BGI_novel_T006862	gi|828294513|ref|XP_012568317.1;PREDICTED: ureide permease 2-like isoform X1 [Cicer arietinum];gi|502094312|ref|XP_004490188.1;PREDICTED: ureide permease 2-like isoform X2 [Cicer arietinum]	8.5	CAAGCAGCAGGAUAUGCGGCA&UGUUGCAUGUGUUGUUGGUUU	GO:0044425(membrane part);GO:0031224(intrinsic component of membrane);GO:0006810(transport);GO:0051234(establishment of localization);GO:0071705(nitrogen compound transport);GO:0016020(membrane);GO:0051179(localization);GO:0016021(integral component of membrane)	NA
ahy-MIR3513-p3_1ss5AG	BGI_novel_T007076	gi|356527769|ref|XP_003532480.1;PREDICTED: CRS2-associated factor 1, chloroplastic-like [Glycine max];gi|922338653|ref|XP_013447316.1;CRS2-associated factor 1 [Medicago truncatula]	9	GGACCAGCGACG-AUGCCGCG&UGUUGCAUGUGUUGUUGGUUU	NA	NA
ahy-MIR3513-p3_1ss5AG	BGI_novel_T007077	gi|356527769|ref|XP_003532480.1;PREDICTED: CRS2-associated factor 1, chloroplastic-like [Glycine max];gi|922338653|ref|XP_013447316.1;CRS2-associated factor 1 [Medicago truncatula]	9	GGACCAGCGACG-AUGCCGCG&UGUUGCAUGUGUUGUUGGUUU	NA	NA
ahy-MIR3513-p3_1ss5AG	BGI_novel_T007078	gi|356527769|ref|XP_003532480.1;PREDICTED: CRS2-associated factor 1, chloroplastic-like [Glycine max];gi|922338653|ref|XP_013447316.1;CRS2-associated factor 1 [Medicago truncatula]	9	GGACCAGCGACG-AUGCCGCG&UGUUGCAUGUGUUGUUGGUUU	NA	NA
ahy-MIR3513-p3_1ss5AG	BGI_novel_T007189	gi|947102562|gb|KRH51054.1;hypothetical protein GLYMA_07G258500 [Glycine max]	5.5	UGAGCAGCGACA-AUGCAACA&UGUUGCAUGUGUUGUUGGUUU	GO:0016020(membrane);GO:0004040(amidase activity);GO:0016811(hydrolase activity, acting on carbon-nitrogen (but not peptide) bonds, in linear amides);GO:0016810(hydrolase activity, acting on carbon-nitrogen (but not peptide) bonds);GO:0031224(intrinsic component of membrane);GO:0016787(hydrolase activity);GO:0003824(catalytic activity);GO:0016021(integral component of membrane);GO:0044425(membran…	ko00380(Tryptophan metabolism);ko00330(Arginine and proline metabolism);ko00360(Phenylalanine metabolism)
ahy-MIR3513-p3_1ss5AG	BGI_novel_T007191	gi|955341651|ref|XP_014617710.1;PREDICTED: putative pentatricopeptide repeat-containing protein At1g12700, mitochondrial isoform X1 [Glycine max]	4.5	UAAGCAGCAACA-AUGCAACA&UGUUGCAUGUGUUGUUGGUUU	NA	NA
ahy-MIR3513-p3_1ss5AG	BGI_novel_T007480	gi|922385618|ref|XP_003593050.2;vacuolar protein sorting-associated protein, putative [Medicago truncatula];gi|951006894|ref|XP_014508574.1;PREDICTED: uncharacterized protein LOC106768127 isoform X2 [Vigna radiata var. radiata]	5	UAAUCAGCAAUGCAUGCAGCA&UGUUGCAUGUGUUGUUGGUUU	NA	NA
ahy-MIR3513-p3_1ss5AG	BGI_novel_T007617	gi|571445969|ref|XP_006576959.1;PREDICTED: pre-mRNA-processing factor 39-like isoform X1 [Glycine max];gi|734316987|gb|KHN02469.1;Pre-mRNA-processing factor 39 [Glycine soja];gi|571445972|ref|XP_006576960.1;PREDICTED: pre-mRNA-processing factor 39-like isoform X3 [Glycine max];gi|356505060|ref|XP_003521310.1;PREDICTED: pre-mRNA-processing factor 39-like isoform X2 [Glycine max]	7.5	GGUGCAAUAGCAGAUGCAACA&UGUUGCAUGUGUUGUUGGUUU	GO:0008152(metabolic process);GO:0043933(macromolecular complex subunit organization);GO:1990904(ribonucleoprotein complex);GO:0045292(mRNA cis splicing, via spliceosome);GO:0044237(cellular metabolic process);GO:0005622(intracellular);GO:0016043(cellular component organization);GO:0044238(primary metabolic process);GO:0003723(RNA binding);GO:1901363(heterocyclic compound binding);GO:1901360(orga…	NA
ahy-MIR3513-p3_1ss5AG	BGI_novel_T007901	gi|920696259|gb|KOM39484.1;hypothetical protein LR48_Vigan03g286600 [Vigna angularis];gi|357446669|ref|XP_003593610.1;dephospho-CoA kinase [Medicago truncatula];gi|502112521|ref|XP_004494358.1;PREDICTED: dephospho-CoA kinase [Cicer arietinum]	10	UCGCCGGCGGCAGAAGCAACU&UGUUGCAUGUGUUGUUGGUUU	GO:1901363(heterocyclic compound binding);GO:0043169(cation binding);GO:0016740(transferase activity);GO:0034654(nucleobase-containing compound biosynthetic process);GO:0009108(coenzyme biosynthetic process);GO:0034641(cellular nitrogen compound metabolic process);GO:0019438(aromatic compound biosynthetic process);GO:0032553(ribonucleotide binding);GO:0009987(cellular process);GO:0008152(metaboli…	ko01100(Metabolic pathways);ko00770(Pantothenate and CoA biosynthesis)
ahy-MIR3513-p3_1ss5AG	BGI_novel_T008056	gi|920677932|gb|KOM25100.1;hypothetical protein LR48_Vigan50s002000 [Vigna angularis];gi|571557630|ref|XP_006604440.1;PREDICTED: F-box protein At4g02760-like [Glycine max]	10.5	UGACCGGCAGCAUACGUGCUACA&UGUUGCAUGU--GUUGUUGGUUU	NA	NA
ahy-MIR3513-p3_1ss5AG	BGI_novel_T008099	gi|357438101|ref|XP_003589326.1;peroxidase family protein [Medicago truncatula];gi|955363261|ref|XP_003545265.3;PREDICTED: peroxidase 9-like [Glycine max];gi|571539657|ref|XP_006601328.1;PREDICTED: peroxidase 9-like [Glycine max]	5.5	GGAGCAGCAACACAUGAAGCA&UGUUGCAUGUGUUGUUGGUUU	GO:0006979(response to oxidative stress);GO:0016209(antioxidant activity);GO:0050896(response to stimulus);GO:0044237(cellular metabolic process);GO:0016684(oxidoreductase activity, acting on peroxide as acceptor);GO:0042221(response to chemical);GO:0097159(organic cyclic compound binding);GO:0042744(hydrogen peroxide catabolic process);GO:0098869(cellular oxidant detoxification);GO:0055114(oxida…	ko01100(Metabolic pathways);ko00940(Phenylpropanoid biosynthesis);ko01110(Biosynthesis of secondary metabolites)
ahy-MIR3513-p3_1ss5AG	BGI_novel_T008611	gi|502165342|ref|XP_004513535.1;PREDICTED: sister chromatid cohesion 1 protein 2 isoform X2 [Cicer arietinum];gi|922339203|ref|XP_003622209.2;sister chromatid cohesion 1 protein [Medicago truncatula];gi|593797440|ref|XP_007161758.1;hypothetical protein PHAVU_001G096000g [Phaseolus vulgaris]	5.5	GAAGCGGCAACACAAGCAGCA&UGUUGCAUGUGUUGUUGGUUU	NA	NA
ahy-MIR3513-p3_1ss5AG	BGI_novel_T009606	gi|922366677|ref|XP_013455505.1;receptor-like kinase, putative [Medicago truncatula];gi|947110503|gb|KRH58829.1;hypothetical protein GLYMA_05G150800 [Glycine max]	0	AAACCAACAACACAUGCAACA&UGUUGCAUGUGUUGUUGGUUU	NA	NA
ahy-MIR3513-p3_1ss5AG	BGI_novel_T009607	gi|922366677|ref|XP_013455505.1;receptor-like kinase, putative [Medicago truncatula];gi|947110503|gb|KRH58829.1;hypothetical protein GLYMA_05G150800 [Glycine max]	0	AAACCAACAACACAUGCAACA&UGUUGCAUGUGUUGUUGGUUU	NA	NA
ahy-MIR3513-p3_1ss5AG	BGI_novel_T010155	gi|388519229|gb|AFK47676.1;unknown [Lotus japonicus]	10	UCGCCGGCGGCAGAAGCAACU&UGUUGCAUGUGUUGUUGGUUU	GO:0043226(organelle);GO:0010468(regulation of gene expression);GO:0050794(regulation of cellular process);GO:0019219(regulation of nucleobase-containing compound metabolic process);GO:0005739(mitochondrion);GO:0003690(double-stranded DNA binding);GO:0044444(cytoplasmic part);GO:0060255(regulation of macromolecule metabolic process);GO:0051171(regulation of nitrogen compound metabolic process);GO…	NA
ahy-MIR3513-p3_1ss5AG	BGI_novel_T010334	gi|571457835|ref|XP_006580908.1;PREDICTED: oxysterol-binding protein isoform X1 [Glycine max];gi|828311950|ref|XP_012571374.1;PREDICTED: LOW QUALITY PROTEIN: oxysterol-binding protein-related protein 1C-like [Cicer arietinum]	7	GAGCCAGCAACAACA-GCAGCG&UGUUGCAUGU-GUUGUUGGUUU	NA	NA
ahy-MIR3513-p3_1ss5AG	BGI_novel_T010453	gi|593795830|ref|XP_007160953.1;hypothetical protein PHAVU_001G031200g [Phaseolus vulgaris];gi|571449182|ref|XP_006578065.1;PREDICTED: AP2-like ethylene-responsive transcription factor ANT [Glycine max]	7.5	GGAGCAGCAGCAGCA-GCAACA&UGUUGCAUG-UGUUGUUGGUUU	NA	NA
ahy-MIR3513-p3_1ss5AG	BGI_novel_T010995	gi|502090769|ref|XP_004489334.1;PREDICTED: senescence-associated carboxylesterase 101 isoform X1 [Cicer arietinum];gi|734363074|gb|KHN16343.1;hypothetical protein glysoja_041437 [Glycine soja]	8	AUUCCAACAGCACAGGC-ACA&UGUUGCAUGUGUUGUUGGUUU	NA	ko04626(Plant-pathogen interaction)
ahy-MIR3513-p3_1ss5AG	BGI_novel_T011303	gi|593331476|ref|XP_007139164.1;hypothetical protein PHAVU_008G006700g [Phaseolus vulgaris];gi|571467125|ref|XP_006583845.1;PREDICTED: ribosomal RNA-processing protein 7 homolog A-like isoform X2 [Glycine max];gi|965599982|dbj|BAT87160.1;hypothetical protein VIGAN_05050200 [Vigna angularis var. angularis]	9.5	AGGCCGGGGGCAUAUGUUGCA&UGUUGCAUGUGUUGUUGGUUU	GO:0030686(90S preribosome);GO:0071826(ribonucleoprotein complex subunit organization);GO:0043234(protein complex);GO:0043227(membrane-bounded organelle);GO:0042274(ribosomal small subunit biogenesis);GO:0030529(intracellular ribonucleoprotein complex);GO:0022618(ribonucleoprotein complex assembly);GO:0043232(intracellular non-membrane-bounded organelle);GO:0071840(cellular component organization…	ko03008(Ribosome biogenesis in eukaryotes)
ahy-MIR3513-p3_1ss5AG	BGI_novel_T011359	gi|356556489|ref|XP_003546557.1;PREDICTED: NADP-dependent malic enzyme [Glycine max];gi|951030785|ref|XP_014514984.1;PREDICTED: NADP-dependent malic enzyme [Vigna radiata var. radiata]	16.5	GCGCCGACAGCACGGACGGCGGCG&UGUUGC---AUGUGUUGUUGGUUU	GO:0005623(cell);GO:0006082(organic acid metabolic process);GO:0050662(coenzyme binding);GO:0003824(catalytic activity);GO:0043231(intracellular membrane-bounded organelle);GO:0042803(protein homodimerization activity);GO:0044281(small molecule metabolic process);GO:0043227(membrane-bounded organelle);GO:0044237(cellular metabolic process);GO:0008152(metabolic process);GO:0016491(oxidoreductase a…	ko00620(Pyruvate metabolism);ko01100(Metabolic pathways);ko00710(Carbon fixation in photosynthetic organisms);ko01200(Carbon metabolism)
ahy-MIR3513-p3_1ss5AG	BGI_novel_T011493	gi|985475175|ref|XP_006495387.2;PREDICTED: toll/interleukin-1 receptor-like protein, partial [Citrus sinensis];gi|593262586|ref|XP_007133472.1;hypothetical protein PHAVU_011G181400g [Phaseolus vulgaris];gi|922379596|ref|XP_013460032.1;disease resistance protein (TIR-NBS-LRR class) [Medicago truncatula]	7.5	GAACCAACCAACACAUGUACGA&UGUUGCAUGUGUUG-UUGGUUU	GO:0050896(response to stimulus)	ko03420(Nucleotide excision repair);ko03440(Homologous recombination);ko04144(Endocytosis);ko04141(Protein processing in endoplasmic reticulum);ko03040(Spliceosome);ko03030(DNA replication);ko03430(Mismatch repair);ko04016(MAPK signaling pathway - plant);ko04626(Plant-pathogen interaction);ko04070(Phosphatidylinositol signaling system)
ahy-MIR3513-p3_1ss5AG	BGI_novel_T011505	gi|356499161|ref|XP_003518411.1;PREDICTED: uncharacterized oxidoreductase At4g09670-like [Glycine max]	8.5	GAAUCAGCAGCAGCA-GCAGCC&UGUUGCAUG-UGUUGUUGGUUU	GO:1901363(heterocyclic compound binding);GO:0003676(nucleic acid binding);GO:0005488(binding);GO:0003723(RNA binding);GO:0097159(organic cyclic compound binding)	ko03040(Spliceosome)
ahy-MIR3513-p3_1ss5AG	BGI_novel_T011506	gi|734370801|gb|KHN19417.1;Quinone oxidoreductase 1 [Glycine soja]	8.5	GAAUCAGCAGCAGCA-GCAGCC&UGUUGCAUG-UGUUGUUGGUUU	GO:0003723(RNA binding);GO:0003676(nucleic acid binding);GO:0097159(organic cyclic compound binding);GO:1901363(heterocyclic compound binding);GO:0005488(binding)	ko03040(Spliceosome)
ahy-MIR3513-p3_1ss5AG	BGI_novel_T011585	gi|502117896|ref|XP_004495999.1;PREDICTED: U1 small nuclear ribonucleoprotein C-like [Cicer arietinum];gi|951016052|ref|XP_014511016.1;PREDICTED: U1 small nuclear ribonucleoprotein C [Vigna radiata var. radiata]	9	AAUCCAACAGCACCAGCAACU&UGUUGCAUGUGUUGUUGGUUU	GO:0019012(virion);GO:0032991(macromolecular complex);GO:0030532(small nuclear ribonucleoprotein complex);GO:0022607(cellular component assembly);GO:0044464(cell part);GO:0034622(cellular macromolecular complex assembly);GO:0000245(spliceosomal complex assembly);GO:0003729(mRNA binding);GO:0030619(U1 snRNA binding);GO:0046872(metal ion binding);GO:1990904(ribonucleoprotein complex);GO:0071010(pre…	ko03040(Spliceosome)
ahy-MIR3513-p3_1ss5AG	BGI_novel_T011918	gi|951027408|ref|XP_014514165.1;PREDICTED: putative inactive cysteine synthase 2 isoform X2 [Vigna radiata var. radiata];gi|947085332|gb|KRH34053.1;hypothetical protein GLYMA_10G159800 [Glycine max];gi|571562315|ref|XP_006605279.1;PREDICTED: cysteine synthase isoform X1 [Glycine max]	10	GAGCCGCAGCAGCAGCUGCAAUA&UGUUGCAUGUGUUGU--UGGUUU	GO:0005622(intracellular);GO:0071704(organic substance metabolic process);GO:0043167(ion binding);GO:0036094(small molecule binding);GO:0003824(catalytic activity);GO:1901564(organonitrogen compound metabolic process);GO:0006082(organic acid metabolic process);GO:0030170(pyridoxal phosphate binding);GO:0046394(carboxylic acid biosynthetic process);GO:0000097(sulfur amino acid biosynthetic process…	ko01230(Biosynthesis of amino acids);ko00270(Cysteine and methionine metabolism);ko00920(Sulfur metabolism);ko01110(Biosynthesis of secondary metabolites);ko01200(Carbon metabolism);ko01100(Metabolic pathways)
ahy-MIR3513-p3_1ss5AG	BGI_novel_T012797	gi|734434364|gb|KHN47392.1;U-box domain-containing protein 17 [Glycine soja];gi|502078401|ref|XP_004485933.1;PREDICTED: U-box domain-containing protein 17 [Cicer arietinum]	10.5	AAGCCAACAGAGCCACA-GCGACA&UGUUGCAUGUG---UUGUUGGUUU	GO:0043226(organelle);GO:0045087(innate immune response);GO:0005623(cell);GO:0043412(macromolecule modification);GO:0036211(protein modification process);GO:0043231(intracellular membrane-bounded organelle);GO:0044464(cell part);GO:0043207(response to external biotic stimulus);GO:0016567(protein ubiquitination);GO:0044424(intracellular part);GO:0004842(ubiquitin-protein transferase activity);GO:0…	NA
ahy-MIR3513-p3_1ss5AG	BGI_novel_T012936	-	6	AAACCAAC-ACACACCCAGCA&UGUUGCAUGUGUUGUUGGUUU	NA	NA
ahy-MIR3513-p3_1ss5AG	BGI_novel_T013194	gi|593801104|ref|XP_007163589.1;hypothetical protein PHAVU_001G247100g [Phaseolus vulgaris]	11.5	AGACCAACAAUACAUGACUGUAACU&UGUUGCA----UGUGUUGUUGGUUU	NA	ko03013(RNA transport);ko03008(Ribosome biogenesis in eukaryotes);ko01230(Biosynthesis of amino acids);ko01110(Biosynthesis of secondary metabolites);ko00400(Phenylalanine, tyrosine and tryptophan biosynthesis);ko01100(Metabolic pathways)
ahy-MIR3513-p3_1ss5AG	BGI_novel_T013295	gi|502142915|ref|XP_004505151.1;PREDICTED: protein IQ-DOMAIN 14 [Cicer arietinum];gi|920687865|gb|KOM31848.1;hypothetical protein LR48_Vigan01g140400 [Vigna angularis]	8.5	AUGCCAUGAAACAUAUGCAGCU&UGUUGCAUGUGUU-GUUGGUUU	NA	ko03015(mRNA surveillance pathway)
ahy-MIR3513-p3_1ss5AG	BGI_novel_T013532	gi|356516364|ref|XP_003526865.1;PREDICTED: probable polygalacturonase isoform X1 [Glycine max];gi|593328608|ref|XP_007137731.1;hypothetical protein PHAVU_009G151200g [Phaseolus vulgaris]	6.5	GGAUCAACAAUCACAUGGAACC&UGUUGCAUGUG-UUGUUGGUUU	GO:0046872(metal ion binding);GO:0071554(cell wall organization or biogenesis);GO:0046914(transition metal ion binding);GO:0005576(extracellular region);GO:0044238(primary metabolic process);GO:0008152(metabolic process);GO:0009987(cellular process);GO:0031224(intrinsic component of membrane);GO:0016021(integral component of membrane);GO:0045229(external encapsulating structure organization);GO:0…	ko00040(Pentose and glucuronate interconversions);ko01100(Metabolic pathways)
ahy-MIR3513-p3_1ss5AG	BGI_novel_T013602	gi|645233973|ref|XP_008223594.1;PREDICTED: mitochondrial 37S ribosomal protein S27 [Prunus mume];gi|702315624|ref|XP_010051808.1;PREDICTED: 28S ribosomal protein S33, mitochondrial [Eucalyptus grandis]	11	GGGCCAAGGCAGGCGUGCAGCC&UGUUGCAUGUGU-UGUUGGUUU	GO:0005622(intracellular);GO:0043227(membrane-bounded organelle);GO:0043229(intracellular organelle);GO:0044444(cytoplasmic part);GO:0044424(intracellular part);GO:0043231(intracellular membrane-bounded organelle);GO:0044464(cell part);GO:0043226(organelle);GO:0005737(cytoplasm);GO:0005739(mitochondrion);GO:0005623(cell)	NA
ahy-MIR3513-p3_1ss5AG	BGI_novel_T013627	gi|734426019|gb|KHN43630.1;Down syndrome critical region protein 3 like [Glycine soja];gi|947100154|gb|KRH48646.1;hypothetical protein GLYMA_07G102800 [Glycine max];gi|947090405|gb|KRH39070.1;hypothetical protein GLYMA_09G176200, partial [Glycine max];gi|955330641|ref|XP_014633391.1;PREDICTED: Down syndrome critical region protein 3 isoform X2 [Glycine max];gi|922349248|ref|XP_003619837.2;down sy…	10	UCGCCGGCGGCAGAAGCAACU&UGUUGCAUGUGUUGUUGGUUU	GO:0046907(intracellular transport);GO:0071705(nitrogen compound transport);GO:0006886(intracellular protein transport);GO:0071702(organic substance transport);GO:0005215(transporter activity);GO:0097708(intracellular vesicle);GO:0008104(protein localization);GO:0005623(cell);GO:0042886(amide transport);GO:0043227(membrane-bounded organelle);GO:0031410(cytoplasmic vesicle);GO:0051179(localization…	ko04144(Endocytosis)
ahy-MIR3513-p3_1ss5AG	BGI_novel_T013760	gi|388496054|gb|AFK36093.1;unknown [Lotus japonicus];gi|703156927|ref|XP_010111592.1;Ribulose-phosphate 3-epimerase, cytoplasmic isoform [Morus notabilis]	8	ACAGCAACAGCACA-GCAGCC&UGUUGCAUGUGUUGUUGGUUU	GO:0044262(cellular carbohydrate metabolic process);GO:0019693(ribose phosphate metabolic process);GO:0043167(ion binding);GO:0072524(pyridine-containing compound metabolic process);GO:0008152(metabolic process);GO:0044444(cytoplasmic part);GO:0016853(isomerase activity);GO:0044464(cell part);GO:0016052(carbohydrate catabolic process);GO:0005829(cytosol);GO:0034641(cellular nitrogen compound meta…	ko00710(Carbon fixation in photosynthetic organisms);ko01200(Carbon metabolism);ko01230(Biosynthesis of amino acids);ko01110(Biosynthesis of secondary metabolites);ko01100(Metabolic pathways);ko00030(Pentose phosphate pathway);ko00040(Pentose and glucuronate interconversions)
ahy-MIR3513-p3_1ss5AG	XM_016076257.2	gi|356500946|ref|XP_003519291.1;PREDICTED: protein NETWORKED 4A-like isoform X1 [Glycine max]	5.5	GAACCAACUUCACAUGGAACA&UGUUGCAUGUGUUGUUGGUUU	GO:0008092(cytoskeletal protein binding);GO:0003779(actin binding);GO:0005515(protein binding);GO:0005488(binding)	ko03013(RNA transport)
ahy-MIR3513-p3_1ss5AG	XM_016076444.2	gi|502096226|ref|XP_004490667.1;PREDICTED: exocyst complex component EXO70B1-like [Cicer arietinum]	9.5	GUGCCGAGGACAUGCUGCAGCA&UGUUGCA-UGUGUUGUUGGUUU	GO:0009987(cellular process);GO:0051234(establishment of localization);GO:0046903(secretion);GO:0005623(cell);GO:0032940(secretion by cell);GO:0044424(intracellular part);GO:0043234(protein complex);GO:0016192(vesicle-mediated transport);GO:0006810(transport);GO:0006887(exocytosis);GO:0005737(cytoplasm);GO:0005938(cell cortex);GO:0044448(cell cortex part);GO:0071944(cell periphery);GO:0051179(loc…	NA
ahy-MIR3513-p3_1ss5AG	XM_016076515.2	gi|19699035|gb|AAL91002.1;asparagine synthetase [Securigera parviflora]	8	GAGCGAGCGUCGCAUGUAGCA&UGUUGCAUGUGUUGUUGGUUU	GO:0016874(ligase activity);GO:0005488(binding);GO:0044281(small molecule metabolic process);GO:1901363(heterocyclic compound binding);GO:0044271(cellular nitrogen compound biosynthetic process);GO:0006807(nitrogen compound metabolic process);GO:0043168(anion binding);GO:0016053(organic acid biosynthetic process);GO:0006520(cellular amino acid metabolic process);GO:0043603(cellular amide metaboli…	ko01110(Biosynthesis of secondary metabolites);ko01100(Metabolic pathways);ko00250(Alanine, aspartate and glutamate metabolism)
ahy-MIR3513-p3_1ss5AG	XM_016076694.2	gi|351727563|ref|NP_001237165.1;uncharacterized protein LOC100527772 [Glycine max]	9	UAGCCGGCGGCAGAAGCAGCA&UGUUGCAUGUGUUGUUGGUUU	GO:0044237(cellular metabolic process);GO:0019538(protein metabolic process);GO:1901564(organonitrogen compound metabolic process);GO:0008152(metabolic process);GO:0006464(cellular protein modification process);GO:0004526(ribonuclease P activity);GO:1901360(organic cyclic compound metabolic process);GO:0009987(cellular process);GO:0016788(hydrolase activity, acting on ester bonds);GO:0008033(tRNA…	ko03013(RNA transport);ko03008(Ribosome biogenesis in eukaryotes)
ahy-MIR3513-p3_1ss5AG	XM_016076764.2	gi|571521644|ref|XP_003545913.2;PREDICTED: uncharacterized protein LOC100787648 [Glycine max]	9	AUGCCAAUAAUGAUGUGCAGCA&UGUUGCAUGU-GUUGUUGGUUU	GO:0046700(heterocycle catabolic process);GO:0000288(nuclear-transcribed mRNA catabolic process, deadenylation-dependent decay);GO:0035770(ribonucleoprotein granule);GO:0043170(macromolecule metabolic process);GO:0019222(regulation of metabolic process);GO:0043226(organelle);GO:0044270(cellular nitrogen compound catabolic process);GO:0044260(cellular macromolecule metabolic process);GO:0044238(pr…	ko03018(RNA degradation)
ahy-MIR3513-p3_1ss5AG	XM_016076962.2	gi|593784153|ref|XP_007155117.1;hypothetical protein PHAVU_003G174900g [Phaseolus vulgaris];gi|965659821|dbj|BAT76240.1;hypothetical protein VIGAN_01421600 [Vigna angularis var. angularis]	7.5	CCACGAGCACCAUAUGCAGCA&UGUUGCAUGUGUUGUUGGUUU	GO:0051252(regulation of RNA metabolic process);GO:0051171(regulation of nitrogen compound metabolic process);GO:2000112(regulation of cellular macromolecule biosynthetic process);GO:0060255(regulation of macromolecule metabolic process);GO:0019219(regulation of nucleobase-containing compound metabolic process);GO:0043231(intracellular membrane-bounded organelle);GO:0003676(nucleic acid binding);…	NA
ahy-MIR3513-p3_1ss5AG	XM_016076968.2	gi|593784153|ref|XP_007155117.1;hypothetical protein PHAVU_003G174900g [Phaseolus vulgaris];gi|965659821|dbj|BAT76240.1;hypothetical protein VIGAN_01421600 [Vigna angularis var. angularis]	7.5	CCACGAGCACCAUAUGCAGCA&UGUUGCAUGUGUUGUUGGUUU	GO:0051252(regulation of RNA metabolic process);GO:0051171(regulation of nitrogen compound metabolic process);GO:2000112(regulation of cellular macromolecule biosynthetic process);GO:0060255(regulation of macromolecule metabolic process);GO:0019219(regulation of nucleobase-containing compound metabolic process);GO:0043231(intracellular membrane-bounded organelle);GO:0003676(nucleic acid binding);…	NA
ahy-MIR3513-p3_1ss5AG	XM_016076968.2	gi|593784153|ref|XP_007155117.1;hypothetical protein PHAVU_003G174900g [Phaseolus vulgaris];gi|965659821|dbj|BAT76240.1;hypothetical protein VIGAN_01421600 [Vigna angularis var. angularis]	25	GAACUAACAGCAGAGAAUAGGGACAUGCAGCA&UGUUGCAUGU-----------GUUGUUGGUUU	GO:0051252(regulation of RNA metabolic process);GO:0051171(regulation of nitrogen compound metabolic process);GO:2000112(regulation of cellular macromolecule biosynthetic process);GO:0060255(regulation of macromolecule metabolic process);GO:0019219(regulation of nucleobase-containing compound metabolic process);GO:0043231(intracellular membrane-bounded organelle);GO:0003676(nucleic acid binding);…	NA
ahy-MIR3513-p3_1ss5AG	XM_016076986.2	-	17	AGACCAAUAACAUUUAGUAGUGCAAUU&UGUUGCAU------GUGUUGUUGGUUU	NA	NA
ahy-MIR3513-p3_1ss5AG	XM_016077437.2	gi|511093534|dbj|BAN37442.1;lectin-like protein [Apios americana]	7	CCACCAACAACAUUGUGUAACA&UGUUGCAUG-UGUUGUUGGUUU	NA	NA
ahy-MIR3513-p3_1ss5AG	XM_016077518.2	gi|571511207|ref|XP_006596386.1;PREDICTED: E3 ubiquitin-protein ligase UPL1-like [Glycine max]	10.5	UAACCAGCUUCGCAUGCGGUCG&UG-UUGCAUGUGUUGUUGGUUU	GO:0016567(protein ubiquitination);GO:0043632(modification-dependent macromolecule catabolic process);GO:0008152(metabolic process);GO:0043229(intracellular organelle);GO:0044248(cellular catabolic process);GO:0009057(macromolecule catabolic process);GO:0006511(ubiquitin-dependent protein catabolic process);GO:0004842(ubiquitin-protein transferase activity);GO:0006464(cellular protein modificatio…	ko04120(Ubiquitin mediated proteolysis)
ahy-MIR3513-p3_1ss5AG	XM_016077875.2	gi|950969251|ref|XP_014499777.1;PREDICTED: uncharacterized protein At2g34160-like [Vigna radiata var. radiata];gi|502080800|ref|XP_004486682.1;PREDICTED: uncharacterized protein At2g34160-like [Cicer arietinum]	8.5	UCGCCAAGAGGUACAUGCAACA&UGUUGCAUGU-GUUGUUGGUUU	GO:0003676(nucleic acid binding);GO:1901363(heterocyclic compound binding);GO:0097159(organic cyclic compound binding);GO:0005488(binding)	NA
ahy-MIR3513-p3_1ss5AG	XM_016078071.2	gi|922394272|ref|XP_013465540.1;group 1 family glycosyltransferase [Medicago truncatula]	8.5	CAGCC-ACAACACGUGUUGCU&UGUUGCAUGUGUUGUUGGUUU	GO:0016021(integral component of membrane);GO:0016020(membrane);GO:0003824(catalytic activity);GO:0031224(intrinsic component of membrane);GO:0044425(membrane part);GO:0016740(transferase activity)	ko00561(Glycerolipid metabolism);ko01100(Metabolic pathways);ko00510(N-Glycan biosynthesis)
ahy-MIR3513-p3_1ss5AG	XM_016078080.2	gi|359807550|ref|NP_001240896.1;uncharacterized protein LOC100815998 [Glycine max]	8	GAACCAGUCAGCUACAAGCAACU&UGUUGCAUGU-GUUG-UUGGUUU	NA	NA
ahy-MIR3513-p3_1ss5AG	XM_016078385.2	gi|951036472|ref|XP_014516622.1;PREDICTED: DEAD-box ATP-dependent RNA helicase 8-like [Vigna radiata var. radiata]	6.5	UUACCAGCAACACCAGCAACA&UGUUGCAUGUGUUGUUGGUUU	GO:0017076(purine nucleotide binding);GO:0017111(nucleoside-triphosphatase activity);GO:0036094(small molecule binding);GO:0035639(purine ribonucleoside triphosphate binding);GO:1901265(nucleoside phosphate binding);GO:0032555(purine ribonucleotide binding);GO:0016787(hydrolase activity);GO:0043168(anion binding);GO:0004386(helicase activity);GO:0000166(nucleotide binding);GO:0003824(catalytic ac…	ko03018(RNA degradation)
ahy-MIR3513-p3_1ss5AG	XM_016078476.2	gi|356517897|ref|XP_003527622.1;PREDICTED: tubulin beta chain [Glycine max]	11.5	GUACCAGCAAUACCAGGAUGCAACA&UGUUGCAU----GUGUUGUUGGUUU	GO:0001883(purine nucleoside binding);GO:0019001(guanyl nucleotide binding);GO:0043229(intracellular organelle);GO:0044446(intracellular organelle part);GO:0005525(GTP binding);GO:0044424(intracellular part);GO:0005623(cell);GO:0007017(microtubule-based process);GO:0043228(non-membrane-bounded organelle);GO:0032549(ribonucleoside binding);GO:0001882(nucleoside binding);GO:0016787(hydrolase activi…	ko04145(Phagosome)
ahy-MIR3513-p3_1ss5AG	XM_016078522.2	gi|357467101|ref|XP_003603835.1;syringolide-induced protein 14-1-1 [Medicago truncatula]	7.5	AAAGCAGCAGCAUCAGCAACA&UGUUGCAUGUGUUGUUGGUUU	NA	NA
ahy-MIR3513-p3_1ss5AG	XM_016078951.2	gi|920698246|gb|KOM41471.1;hypothetical protein LR48_Vigan04g166900 [Vigna angularis]	7.5	UCACCAGCAACAACA-GCAGCA&UGUUGCAUGU-GUUGUUGGUUU	NA	NA
ahy-MIR3513-p3_1ss5AG	XM_016079190.2	gi|950964305|ref|XP_014498530.1;PREDICTED: lysM domain-containing GPI-anchored protein 1 [Vigna radiata var. radiata]	10	GCACCAACAACGACUCAUGCAACG&UGUUGCAUG---UGUUGUUGGUUU	NA	ko04626(Plant-pathogen interaction)
ahy-MIR3513-p3_1ss5AG	XM_016079497.2	gi|356507971|ref|XP_003522736.1;PREDICTED: phosphoenolpyruvate carboxykinase [ATP]-like [Glycine max]	9.5	UAACCGAGAACACUCGUGCAGCU&UGUUGCAU--GUGUUGUUGGUUU	GO:0004611(phosphoenolpyruvate carboxykinase activity);GO:0005829(cytosol);GO:0008152(metabolic process);GO:0005737(cytoplasm);GO:0046364(monosaccharide biosynthetic process);GO:0044283(small molecule biosynthetic process);GO:0017076(purine nucleotide binding);GO:0016772(transferase activity, transferring phosphorus-containing groups);GO:0005996(monosaccharide metabolic process);GO:0035639(purine…	ko00020(Citrate cycle (TCA cycle));ko01100(Metabolic pathways);ko00710(Carbon fixation in photosynthetic organisms);ko00010(Glycolysis / Gluconeogenesis);ko01110(Biosynthesis of secondary metabolites);ko01200(Carbon metabolism);ko00620(Pyruvate metabolism)
ahy-MIR3513-p3_1ss5AG	XM_016079649.2	gi|502132796|ref|XP_004501532.1;PREDICTED: subtilisin-like protease SBT1.7 [Cicer arietinum]	7.5	CAGCC-ACAGCACAUGGAAUU&UGUUGCAUGUGUUGUUGGUUU	GO:0008152(metabolic process);GO:0044238(primary metabolic process);GO:1901564(organonitrogen compound metabolic process);GO:0019538(protein metabolic process);GO:0006807(nitrogen compound metabolic process);GO:0006508(proteolysis);GO:0008236(serine-type peptidase activity);GO:0016787(hydrolase activity);GO:0043170(macromolecule metabolic process);GO:0071704(organic substance metabolic process);G…	ko00010(Glycolysis / Gluconeogenesis);ko00350(Tyrosine metabolism);ko01110(Biosynthesis of secondary metabolites);ko00520(Amino sugar and nucleotide sugar metabolism);ko01200(Carbon metabolism);ko01100(Metabolic pathways);ko04146(Peroxisome);ko00071(Fatty acid degradation)
ahy-MIR3513-p3_1ss5AG	XM_016079665.2	gi|356514571|ref|XP_003525979.1;PREDICTED: vacuolar-processing enzyme [Glycine max]	8.5	AUGCCU-CAGCACAUGCAUGCA&UGU-UGCAUGUGUUGUUGGUUU	GO:0004175(endopeptidase activity);GO:0008152(metabolic process);GO:0043231(intracellular membrane-bounded organelle);GO:0071704(organic substance metabolic process);GO:0005623(cell);GO:0044248(cellular catabolic process);GO:0043229(intracellular organelle);GO:0010467(gene expression);GO:0005737(cytoplasm);GO:0070011(peptidase activity, acting on L-amino acid peptides);GO:0044424(intracellular pa…	NA
ahy-MIR3513-p3_1ss5AG	XM_016079749.2	gi|947066270|gb|KRH15413.1;hypothetical protein GLYMA_14G086300 [Glycine max]	8.5	GAACGGUUACGACACGUGCGGCG&UGUUGCAUGUGUUGU--UGGUUU	GO:0016787(hydrolase activity);GO:0003824(catalytic activity)	NA
ahy-MIR3513-p3_1ss5AG	XM_016080147.2	gi|659095069|ref|XP_008448379.1;PREDICTED: ras-related protein RABE1c [Cucumis melo]	8	CAACCAACAAGAUCAGGCAGCA&UGUUGCAUG-UGUUGUUGGUUU	GO:0016788(hydrolase activity, acting on ester bonds);GO:0097159(organic cyclic compound binding);GO:0042886(amide transport);GO:0008081(phosphoric diester hydrolase activity);GO:0005488(binding);GO:0050789(regulation of biological process);GO:0005623(cell);GO:0032553(ribonucleotide binding);GO:0016787(hydrolase activity);GO:0044464(cell part);GO:0032549(ribonucleoside binding);GO:0033036(macromo…	ko04144(Endocytosis)
ahy-MIR3513-p3_1ss5AG	XM_016080231.2	gi|593783967|ref|XP_007155024.1;hypothetical protein PHAVU_003G166800g [Phaseolus vulgaris]	7	CAGCAUACGAUGCAUGCAACG&UGUUGCAUGUGUUGUUGGUUU	GO:0016020(membrane)	NA
ahy-MIR3513-p3_1ss5AG	XM_016080241.2	gi|950959842|ref|XP_014497533.1;PREDICTED: transcription factor RAX2-like [Vigna radiata var. radiata]	7	AAACCAACAACAAGAGCAGCA&UGUUGCAUGUGUUGUUGGUUU	GO:0005488(binding);GO:1901363(heterocyclic compound binding);GO:0003676(nucleic acid binding);GO:0003677(DNA binding);GO:0097159(organic cyclic compound binding)	NA
ahy-MIR3513-p3_1ss5AG	XM_016080260.2	gi|356550171|ref|XP_003543462.1;PREDICTED: beta-galactosidase 8-like [Glycine max]	5.5	CGAUUAUCAAUACAUGCAACG&UGUUGCAUGUGUUGUUGGUUU	GO:0005618(cell wall);GO:0005975(carbohydrate metabolic process);GO:0005488(binding);GO:0016787(hydrolase activity);GO:0044444(cytoplasmic part);GO:0008152(metabolic process);GO:0005737(cytoplasm);GO:0043226(organelle);GO:0030246(carbohydrate binding);GO:0044424(intracellular part);GO:0044238(primary metabolic process);GO:0043231(intracellular membrane-bounded organelle);GO:0015925(galactosidase …	ko00604(Glycosphingolipid biosynthesis - ganglio series);ko00531(Glycosaminoglycan degradation);ko00052(Galactose metabolism);ko01100(Metabolic pathways);ko00600(Sphingolipid metabolism);ko00511(Other glycan degradation)
ahy-MIR3513-p3_1ss5AG	XM_016080323.2	gi|920700929|gb|KOM44154.1;hypothetical protein LR48_Vigan05g175900 [Vigna angularis]	7	AAACCAACAACAAGAGCAGCA&UGUUGCAUGUGUUGUUGGUUU	NA	NA
ahy-MIR3513-p3_1ss5AG	XM_016080438.2	gi|965604902|dbj|BAT92078.1;hypothetical protein VIGAN_07073900 [Vigna angularis var. angularis]	5.5	GGACCAAAUAACAC-UGUAACA&UGUUGCAUGUGUUGUU-GGUUU	GO:0060255(regulation of macromolecule metabolic process);GO:0010556(regulation of macromolecule biosynthetic process);GO:0080090(regulation of primary metabolic process);GO:1901363(heterocyclic compound binding);GO:1903506(regulation of nucleic acid-templated transcription);GO:0065007(biological regulation);GO:0005634(nucleus);GO:0006355(regulation of transcription, DNA-templated);GO:0005622(int…	ko04933(AGE-RAGE signaling pathway in diabetic complications);ko03040(Spliceosome);ko04075(Plant hormone signal transduction)
ahy-MIR3513-p3_1ss5AG	XM_016080586.2	gi|922386864|ref|XP_003597023.2;peroxidase family protein [Medicago truncatula]	11	AUUGCAACAACACAUGCUCAA&UGUUGCAUGUGUUGUUGGUUU	GO:0043169(cation binding);GO:0016491(oxidoreductase activity);GO:0016209(antioxidant activity);GO:0004601(peroxidase activity);GO:0042744(hydrogen peroxide catabolic process);GO:0043167(ion binding);GO:0003824(catalytic activity);GO:0008152(metabolic process);GO:0005488(binding);GO:0055114(oxidation-reduction process);GO:0046872(metal ion binding);GO:0046906(tetrapyrrole binding);GO:0072593(reac…	ko00940(Phenylpropanoid biosynthesis);ko01100(Metabolic pathways);ko01110(Biosynthesis of secondary metabolites)
ahy-MIR3513-p3_1ss5AG	XM_016081016.2	gi|502084134|ref|XP_004487630.1;PREDICTED: scarecrow-like protein 21 [Cicer arietinum]	8	GAGCCAGGGAUCAUAUGUAACU&UGUUGCAUGUG-UUGUUGGUUU	GO:0065007(biological regulation);GO:0019219(regulation of nucleobase-containing compound metabolic process);GO:1903506(regulation of nucleic acid-templated transcription);GO:1901363(heterocyclic compound binding);GO:0031326(regulation of cellular biosynthetic process);GO:0044464(cell part);GO:0043229(intracellular organelle);GO:0060255(regulation of macromolecule metabolic process);GO:0031323(re…	ko04075(Plant hormone signal transduction)
ahy-MIR3513-p3_1ss5AG	XM_016081144.2	gi|306489779|gb|ADM94307.1;NAC transcription factor [Arachis hypogaea]	8	ACUCCAACAGCAACA-GCAACA&UGUUGCAUGU-GUUGUUGGUUU	GO:0043227(membrane-bounded organelle);GO:0009889(regulation of biosynthetic process);GO:0005623(cell);GO:0044425(membrane part);GO:0080090(regulation of primary metabolic process);GO:0097159(organic cyclic compound binding);GO:0044464(cell part);GO:0043229(intracellular organelle);GO:0050789(regulation of biological process);GO:0010556(regulation of macromolecule biosynthetic process);GO:0043226…	ko03015(mRNA surveillance pathway);ko04141(Protein processing in endoplasmic reticulum);ko01100(Metabolic pathways);ko03013(RNA transport);ko04120(Ubiquitin mediated proteolysis);ko00561(Glycerolipid metabolism);ko03018(RNA degradation)
ahy-MIR3513-p3_1ss5AG	XM_016081410.2	gi|947062657|gb|KRH11918.1;hypothetical protein GLYMA_15G139000 [Glycine max]	10	CAGCCAGCAGCA---GCAGCA&UGUUGCAUGUGUUGUUGGUUU	NA	ko04016(MAPK signaling pathway - plant);ko04626(Plant-pathogen interaction)
ahy-MIR3513-p3_1ss5AG	XM_016081484.2	gi|356500043|ref|XP_003518844.1;PREDICTED: benzyl alcohol O-benzoyltransferase [Glycine max]	7.5	CCGCCAAGAAUUACAUGCAACC&UGUUGCAUGUG-UUGUUGGUUU	GO:0016747(transferase activity, transferring acyl groups other than amino-acyl groups);GO:0003824(catalytic activity);GO:0016740(transferase activity);GO:0016746(transferase activity, transferring acyl groups)	NA
ahy-MIR3513-p3_1ss5AG	XM_016081702.2	gi|502090769|ref|XP_004489334.1;PREDICTED: senescence-associated carboxylesterase 101 isoform X1 [Cicer arietinum];gi|734363074|gb|KHN16343.1;hypothetical protein glysoja_041437 [Glycine soja]	8	AUUCCAACAGCACAGGC-ACA&UGUUGCAUGUGUUGUUGGUUU	NA	ko04626(Plant-pathogen interaction)
ahy-MIR3513-p3_1ss5AG	XM_016081704.2	gi|502090769|ref|XP_004489334.1;PREDICTED: senescence-associated carboxylesterase 101 isoform X1 [Cicer arietinum];gi|734363074|gb|KHN16343.1;hypothetical protein glysoja_041437 [Glycine soja]	8	AUUCCAACAGCACAGGC-ACA&UGUUGCAUGUGUUGUUGGUUU	NA	ko04626(Plant-pathogen interaction)
ahy-MIR3513-p3_1ss5AG	XM_016081748.2	gi|502132152|ref|XP_004501243.1;PREDICTED: uncharacterized protein LOC101496875 [Cicer arietinum]	6	AAAGCAGCGGCGCA-GCAACA&UGUUGCAUGUGUUGUUGGUUU	GO:0008270(zinc ion binding);GO:0046872(metal ion binding);GO:0016874(ligase activity);GO:0005488(binding);GO:0003824(catalytic activity);GO:0043167(ion binding);GO:0043169(cation binding);GO:0046914(transition metal ion binding)	NA
ahy-MIR3513-p3_1ss5AG	XM_016081807.2	gi|593783369|ref|XP_007154725.1;hypothetical protein PHAVU_003G142200g [Phaseolus vulgaris]	15	UAGCGCAGCAGCACGUGUGGGCAGCG&UGUUGC----AUGUGUUGUUG-GUUU	NA	NA
ahy-MIR3513-p3_1ss5AG	XM_016081831.2	gi|593783369|ref|XP_007154725.1;hypothetical protein PHAVU_003G142200g [Phaseolus vulgaris]	15	UAGCGCAGCAGCACGUGUGGGCAGCG&UGUUGC----AUGUGUUGUUG-GUUU	NA	NA
ahy-MIR3513-p3_1ss5AG	XM_016082361.2	gi|490255592|gb|AGL09062.1;acetohydroxyacid synthase catalytic subunit [Glycine max]	7.5	AUACCAGCAGCACGUGUGACG&UGUUGCAUGUGUUGUUGGUUU	GO:0008652(cellular amino acid biosynthetic process);GO:0009099(valine biosynthetic process);GO:1901363(heterocyclic compound binding);GO:0006807(nitrogen compound metabolic process);GO:0000287(magnesium ion binding);GO:0006549(isoleucine metabolic process);GO:0046872(metal ion binding);GO:1901681(sulfur compound binding);GO:0003824(catalytic activity);GO:0050660(flavin adenine dinucleotide bindi…	ko00770(Pantothenate and CoA biosynthesis);ko00650(Butanoate metabolism);ko01100(Metabolic pathways);ko01210(2-Oxocarboxylic acid metabolism);ko00290(Valine, leucine and isoleucine biosynthesis);ko01110(Biosynthesis of secondary metabolites);ko01230(Biosynthesis of amino acids);ko00660(C5-Branched dibasic acid metabolism)
ahy-MIR3513-p3_1ss5AG	XM_016082370.2	gi|388515987|gb|AFK46055.1;unknown [Lotus japonicus]	10	CGACGAGCAAUAUAUCAUGCAACA&UGUUGCAUG---UGUUGUUGGUUU	GO:0008152(metabolic process);GO:0043226(organelle);GO:0044260(cellular macromolecule metabolic process);GO:0005737(cytoplasm);GO:0044267(cellular protein metabolic process);GO:0043227(membrane-bounded organelle);GO:0044248(cellular catabolic process);GO:0044237(cellular metabolic process);GO:0008233(peptidase activity);GO:0030163(protein catabolic process);GO:0044424(intracellular part);GO:19053…	ko03050(Proteasome)
ahy-MIR3513-p3_1ss5AG	XM_016082371.2	gi|388515987|gb|AFK46055.1;unknown [Lotus japonicus]	10	CGACGAGCAAUAUAUCAUGCAACA&UGUUGCAUG---UGUUGUUGGUUU	GO:0008152(metabolic process);GO:0043226(organelle);GO:0044260(cellular macromolecule metabolic process);GO:0005737(cytoplasm);GO:0044267(cellular protein metabolic process);GO:0043227(membrane-bounded organelle);GO:0044248(cellular catabolic process);GO:0044237(cellular metabolic process);GO:0008233(peptidase activity);GO:0030163(protein catabolic process);GO:0044424(intracellular part);GO:19053…	ko03050(Proteasome)
ahy-MIR3513-p3_1ss5AG	XM_016082394.2	gi|449440548|ref|XP_004138046.1;PREDICTED: nuclear transcription factor Y subunit C-1-like [Cucumis sativus]	7.5	CCUCCAGCAACAACA-GCAACA&UGUUGCAUGU-GUUGUUGGUUU	GO:0005622(intracellular);GO:0005623(cell);GO:0005634(nucleus);GO:0046982(protein heterodimerization activity);GO:0046983(protein dimerization activity);GO:0043227(membrane-bounded organelle);GO:0005488(binding);GO:0043226(organelle);GO:0043229(intracellular organelle);GO:0005515(protein binding);GO:0044424(intracellular part);GO:0043231(intracellular membrane-bounded organelle);GO:0044464(cell p…	NA
ahy-MIR3513-p3_1ss5AG	XM_016082453.1	gi|951004645|ref|XP_014507918.1;PREDICTED: uncharacterized protein LOC106767519 isoform X2 [Vigna radiata var. radiata]	11	GAACUAACAGCACAGAGCAUGG&UGUUGC-AUGUGUUGUUGGUUU	GO:0003824(catalytic activity)	ko00790(Folate biosynthesis)
ahy-MIR3513-p3_1ss5AG	XM_016082530.2	gi|951068758|ref|XP_014489864.1;PREDICTED: GATA transcription factor 28 [Vigna radiata var. radiata];gi|571472616|ref|XP_006585660.1;PREDICTED: GATA transcription factor 28-like isoform X1 [Glycine max]	8.5	GGGCCAAGAACACUCUGCAAUG&UGUUGCA-UGUGUUGUUGGUUU	GO:0008270(zinc ion binding);GO:0003677(DNA binding);GO:0009889(regulation of biosynthetic process);GO:0046914(transition metal ion binding);GO:0010556(regulation of macromolecule biosynthetic process);GO:0019222(regulation of metabolic process);GO:0050789(regulation of biological process);GO:0097159(organic cyclic compound binding);GO:0043565(sequence-specific DNA binding);GO:0065007(biological …	ko04712(Circadian rhythm - plant)
ahy-MIR3513-p3_1ss5AG	XM_016082531.2	gi|951068758|ref|XP_014489864.1;PREDICTED: GATA transcription factor 28 [Vigna radiata var. radiata];gi|571472616|ref|XP_006585660.1;PREDICTED: GATA transcription factor 28-like isoform X1 [Glycine max]	8.5	GGGCCAAGAACACUCUGCAAUG&UGUUGCA-UGUGUUGUUGGUUU	GO:0008270(zinc ion binding);GO:0003677(DNA binding);GO:0009889(regulation of biosynthetic process);GO:0046914(transition metal ion binding);GO:0010556(regulation of macromolecule biosynthetic process);GO:0019222(regulation of metabolic process);GO:0050789(regulation of biological process);GO:0097159(organic cyclic compound binding);GO:0043565(sequence-specific DNA binding);GO:0065007(biological …	ko04712(Circadian rhythm - plant)
ahy-MIR3513-p3_1ss5AG	XM_016082612.2	gi|571472486|ref|XP_006585625.1;PREDICTED: topless-related protein 1-like isoform X1 [Glycine max]	7.5	GCACCAAUAUCGCAUGCGACU&UGUUGCAUGUGUUGUUGGUUU	GO:0051252(regulation of RNA metabolic process);GO:0050789(regulation of biological process);GO:0050794(regulation of cellular process);GO:0019222(regulation of metabolic process);GO:0031326(regulation of cellular biosynthetic process);GO:0009889(regulation of biosynthetic process);GO:0065007(biological regulation);GO:0010556(regulation of macromolecule biosynthetic process);GO:0051171(regulation…	NA
ahy-MIR3513-p3_1ss5AG	XM_016082637.2	gi|939460716|gb|ALJ77575.1;hydroxycinnamoyl-CoA:shikimate hydroxycinnamoyl transferase, partial [Medicago sativa]	8.5	UGGCAUGCAGCACCAUGCAGCA&UGUUGCAUG-UGUUGUUGGUUU	GO:0003824(catalytic activity);GO:0016747(transferase activity, transferring acyl groups other than amino-acyl groups);GO:0016740(transferase activity);GO:0016746(transferase activity, transferring acyl groups)	ko00940(Phenylpropanoid biosynthesis);ko00945(Stilbenoid, diarylheptanoid and gingerol biosynthesis);ko00941(Flavonoid biosynthesis);ko01100(Metabolic pathways);ko01110(Biosynthesis of secondary metabolites)
ahy-MIR3513-p3_1ss5AG	XM_016082921.2	gi|571464238|ref|XP_006582999.1;PREDICTED: heat shock 70 kDa protein 15-like [Glycine max]	13	AAGCCAGCUACUCCCCCAGCACAAGCAACA&UGUUGCAUGUGUU---------GUUGGUUU	GO:0097367(carbohydrate derivative binding);GO:0043168(anion binding);GO:0032553(ribonucleotide binding);GO:0000166(nucleotide binding);GO:0005524(ATP binding);GO:0016628(oxidoreductase activity, acting on the CH-CH group of donors, NAD or NADP as acceptor);GO:0055114(oxidation-reduction process);GO:0017076(purine nucleotide binding);GO:0032555(purine ribonucleotide binding);GO:0032440(2-alkenal …	NA
ahy-MIR3513-p3_1ss5AG	XM_016082945.2	gi|947095690|gb|KRH44275.1;hypothetical protein GLYMA_08G201000 [Glycine max]	13.5	AAGCCAACAACAUUUUUGUGCAAAA&UGUUGCAU----GUGUUGUUGGUUU	GO:0005622(intracellular);GO:0016591(DNA-directed RNA polymerase II, holoenzyme);GO:0006464(cellular protein modification process);GO:0071704(organic substance metabolic process);GO:0005623(cell);GO:0055029(nuclear DNA-directed RNA polymerase complex);GO:0016569(covalent chromatin modification);GO:0006368(transcription elongation from RNA polymerase II promoter);GO:1901576(organic substance biosy…	NA
ahy-MIR3513-p3_1ss5AG	XM_016083405.2	gi|951031060|ref|XP_014515054.1;PREDICTED: mediator of RNA polymerase II transcription subunit 9 isoform X2 [Vigna radiata var. radiata];gi|593266736|ref|XP_007135546.1;hypothetical protein PHAVU_010G138400g [Phaseolus vulgaris]	10	UCGCCGGCGGCAGAAGCAACU&UGUUGCAUGUGUUGUUGGUUU	NA	NA
ahy-MIR3513-p3_1ss5AG	XM_016083405.2	gi|951031060|ref|XP_014515054.1;PREDICTED: mediator of RNA polymerase II transcription subunit 9 isoform X2 [Vigna radiata var. radiata];gi|593266736|ref|XP_007135546.1;hypothetical protein PHAVU_010G138400g [Phaseolus vulgaris]	8.5	GCAGCAGCAGCAGCUGCAACA&UGUUGCAUGUGUUGUUGGUUU	NA	NA
ahy-MIR3513-p3_1ss5AG	XM_016083816.2	gi|14589309|emb|CAC43237.1;lipoxygenase [Sesbania rostrata]	13.5	CAACUCAACGGCAUGACUGUGCAACA&UGUUGCAU----GUGUUGUUG-GUUU	GO:0009058(biosynthetic process);GO:0044281(small molecule metabolic process);GO:0016701(oxidoreductase activity, acting on single donors with incorporation of molecular oxygen);GO:0031408(oxylipin biosynthetic process);GO:0031407(oxylipin metabolic process);GO:0008152(metabolic process);GO:0055114(oxidation-reduction process);GO:0009987(cellular process);GO:0044255(cellular lipid metabolic proce…	ko00591(Linoleic acid metabolism);ko01110(Biosynthesis of secondary metabolites);ko00592(alpha-Linolenic acid metabolism);ko01100(Metabolic pathways)
ahy-MIR3513-p3_1ss5AG	XM_016083829.2	gi|920717831|gb|KOM57028.1;hypothetical protein LR48_Vigan11g006000 [Vigna angularis]	8	AGGCCGAGGAUGCA-GCAGCA&UGUUGCAUGUGUUGUUGGUUU	NA	ko00240(Pyrimidine metabolism);ko01100(Metabolic pathways)
ahy-MIR3513-p3_1ss5AG	XM_016083829.2	gi|920717831|gb|KOM57028.1;hypothetical protein LR48_Vigan11g006000 [Vigna angularis]	9.5	GCGCCGGCACCGCA-GCAGCA&UGUUGCAUGUGUUGUUGGUUU	NA	ko00240(Pyrimidine metabolism);ko01100(Metabolic pathways)
ahy-MIR3513-p3_1ss5AG	XM_016083970.2	gi|571438236|ref|XP_006574521.1;PREDICTED: protein translocase subunit SecA, chloroplastic-like [Glycine max]	8.5	GAGGCAGCAAUACGCUGCGACU&UGUUGCA-UGUGUUGUUGGUUU	NA	ko03060(Protein export)
ahy-MIR3513-p3_1ss5AG	XM_016084305.2	gi|357511945|ref|XP_003626261.1;acyl-CoA-binding domain protein [Medicago truncatula]	7	AAACCAACACCACGUGCGGGA&UGUUGCAUGUGUUGUUGGUUU	GO:1901567(fatty acid derivative binding);GO:0043168(anion binding);GO:1901681(sulfur compound binding);GO:0005488(binding);GO:0000062(fatty-acyl-CoA binding);GO:0050662(coenzyme binding);GO:0048037(cofactor binding);GO:0043167(ion binding)	NA
ahy-MIR3513-p3_1ss5AG	XM_016084583.2	gi|951027408|ref|XP_014514165.1;PREDICTED: putative inactive cysteine synthase 2 isoform X2 [Vigna radiata var. radiata];gi|947085332|gb|KRH34053.1;hypothetical protein GLYMA_10G159800 [Glycine max];gi|571562315|ref|XP_006605279.1;PREDICTED: cysteine synthase isoform X1 [Glycine max]	10	GAGCCGCAGCAGCAGCUGCAAUA&UGUUGCAUGUGUUGU--UGGUUU	GO:0005622(intracellular);GO:0071704(organic substance metabolic process);GO:0043167(ion binding);GO:0036094(small molecule binding);GO:0003824(catalytic activity);GO:1901564(organonitrogen compound metabolic process);GO:0006082(organic acid metabolic process);GO:0030170(pyridoxal phosphate binding);GO:0046394(carboxylic acid biosynthetic process);GO:0000097(sulfur amino acid biosynthetic process…	ko01230(Biosynthesis of amino acids);ko00270(Cysteine and methionine metabolism);ko00920(Sulfur metabolism);ko01110(Biosynthesis of secondary metabolites);ko01200(Carbon metabolism);ko01100(Metabolic pathways)
ahy-MIR3513-p3_1ss5AG	XM_016085253.2	gi|571480855|ref|XP_006588461.1;PREDICTED: uncharacterized protein LOC100798109 isoform X1 [Glycine max]	7.5	AUGCCACCAACACGUGCAAAA&UGUUGCAUGUGUUGUUGGUUU	NA	NA
ahy-MIR3513-p3_1ss5AG	XM_016085254.2	gi|571480855|ref|XP_006588461.1;PREDICTED: uncharacterized protein LOC100798109 isoform X1 [Glycine max]	7.5	AUGCCACCAACACGUGCAAAA&UGUUGCAUGUGUUGUUGGUUU	NA	NA
ahy-MIR3513-p3_1ss5AG	XM_016085255.2	gi|571480855|ref|XP_006588461.1;PREDICTED: uncharacterized protein LOC100798109 isoform X1 [Glycine max]	7.5	AUGCCACCAACACGUGCAAAA&UGUUGCAUGUGUUGUUGGUUU	NA	NA
ahy-MIR3513-p3_1ss5AG	XM_016085306.2	gi|571483637|ref|XP_006589298.1;PREDICTED: uncharacterized protein At4g14450, chloroplastic-like [Glycine max]	8	UCGCCGACCACGCA-GCAACC&UGUUGCAUGUGUUGUUGGUUU	NA	NA
ahy-MIR3513-p3_1ss5AG	XM_016085374.2	gi|828303353|ref|XP_012569842.1;PREDICTED: uncharacterized protein LOC101501999 isoform X1 [Cicer arietinum]	11.5	AAACCAGCAGCAUGGAGUGCAAUU&UGUUGCAU---GUGUUGUUGGUUU	GO:0003824(catalytic activity);GO:0005622(intracellular);GO:0005737(cytoplasm);GO:0008757(S-adenosylmethionine-dependent methyltransferase activity);GO:0005623(cell);GO:0016491(oxidoreductase activity);GO:0044424(intracellular part);GO:0016740(transferase activity);GO:0032259(methylation);GO:0008152(metabolic process);GO:0055114(oxidation-reduction process);GO:0044464(cell part);GO:0008168(methyl…	NA
ahy-MIR3513-p3_1ss5AG	XM_016085375.2	gi|828303353|ref|XP_012569842.1;PREDICTED: uncharacterized protein LOC101501999 isoform X1 [Cicer arietinum]	11.5	AAACCAGCAGCAUGGAGUGCAAUU&UGUUGCAU---GUGUUGUUGGUUU	GO:0003824(catalytic activity);GO:0005622(intracellular);GO:0005737(cytoplasm);GO:0008757(S-adenosylmethionine-dependent methyltransferase activity);GO:0005623(cell);GO:0016491(oxidoreductase activity);GO:0044424(intracellular part);GO:0016740(transferase activity);GO:0032259(methylation);GO:0008152(metabolic process);GO:0055114(oxidation-reduction process);GO:0044464(cell part);GO:0008168(methyl…	NA
ahy-MIR3513-p3_1ss5AG	XM_016085375.2	gi|828303353|ref|XP_012569842.1;PREDICTED: uncharacterized protein LOC101501999 isoform X1 [Cicer arietinum]	8	GGACCAACCCAAAACACAUGGAACC&UGUUGCAUGUGUU----GUUGGUUU	GO:0003824(catalytic activity);GO:0005622(intracellular);GO:0005737(cytoplasm);GO:0008757(S-adenosylmethionine-dependent methyltransferase activity);GO:0005623(cell);GO:0016491(oxidoreductase activity);GO:0044424(intracellular part);GO:0016740(transferase activity);GO:0032259(methylation);GO:0008152(metabolic process);GO:0055114(oxidation-reduction process);GO:0044464(cell part);GO:0008168(methyl…	NA
ahy-MIR3513-p3_1ss5AG	XM_016085789.2	gi|593781791|ref|XP_007153936.1;hypothetical protein PHAVU_003G077700g [Phaseolus vulgaris]	8.5	CAACCAGCAGUACCAGCAGCA&UGUUGCAUGUGUUGUUGGUUU	GO:1901265(nucleoside phosphate binding);GO:0000166(nucleotide binding);GO:0003676(nucleic acid binding);GO:0097159(organic cyclic compound binding);GO:1901363(heterocyclic compound binding);GO:0005488(binding);GO:0036094(small molecule binding)	ko03013(RNA transport)
ahy-MIR3513-p3_1ss5AG	XM_016085891.2	gi|571467885|ref|XP_006584068.1;PREDICTED: E3 ubiquitin-protein ligase RHF1A-like [Glycine max];gi|356564526|ref|XP_003550504.1;PREDICTED: E3 ubiquitin-protein ligase RHF1A-like [Glycine max]	8.5	GCUCCGAUGACGCCUGCAGCA&UGUUGCAUGUGUUGUUGGUUU	GO:0071704(organic substance metabolic process);GO:0061630(ubiquitin protein ligase activity);GO:0036211(protein modification process);GO:0003824(catalytic activity);GO:0000209(protein polyubiquitination);GO:0009987(cellular process);GO:0044260(cellular macromolecule metabolic process);GO:0016567(protein ubiquitination);GO:0044248(cellular catabolic process);GO:0019787(ubiquitin-like protein tran…	NA
ahy-MIR3513-p3_1ss5AG	XM_016086298.2	gi|734423719|gb|KHN42338.1;Snakin-1 [Glycine soja]	12	CAGCCAGCAACAUUUGCUGAA&UGUUGCAUGUGUUGUUGGUUU	NA	ko00563(Glycosylphosphatidylinositol (GPI)-anchor biosynthesis);ko01100(Metabolic pathways)
ahy-MIR3513-p3_1ss5AG	XM_016086490.2	gi|593627946|ref|XP_007143001.1;hypothetical protein PHAVU_007G035300g [Phaseolus vulgaris]	9	GAGCCACCAACAUCAUGCUCGCA&UGU-UGCAUG-UGUUGUUGGUUU	NA	ko04144(Endocytosis)
ahy-MIR3513-p3_1ss5AG	XM_016086491.2	gi|965607208|dbj|BAT93699.1;hypothetical protein VIGAN_08022600 [Vigna angularis var. angularis]	11	AGACCAGCAGCACC-GCAUAG&UGUUGCAUGUGUUGUUGGUUU	GO:0006888(ER to Golgi vesicle-mediated transport);GO:0098796(membrane protein complex);GO:0043229(intracellular organelle);GO:0016020(membrane);GO:0005794(Golgi apparatus);GO:0030134(COPII-coated ER to Golgi transport vesicle);GO:0098588(bounding membrane of organelle);GO:0044446(intracellular organelle part);GO:0012505(endomembrane system);GO:0043234(protein complex);GO:0030117(membrane coat);G…	ko04141(Protein processing in endoplasmic reticulum)
ahy-MIR3513-p3_1ss5AG	XM_016086496.2	gi|871510|emb|CAA90080.1;small GTP-binding protein [Pisum sativum]	12	GAACCAGCAUCUUCAC-UGCAGCA&UGUUGCAUGUG---UUGUUGGUUU	GO:0005623(cell);GO:0036094(small molecule binding);GO:0005525(GTP binding);GO:1901363(heterocyclic compound binding);GO:1901265(nucleoside phosphate binding);GO:0017076(purine nucleotide binding);GO:0005488(binding);GO:0050896(response to stimulus);GO:0035639(purine ribonucleoside triphosphate binding);GO:0001883(purine nucleoside binding);GO:0035556(intracellular signal transduction);GO:0032549…	ko04144(Endocytosis)
ahy-MIR3513-p3_1ss5AG	XM_016086643.2	gi|951029297|ref|XP_014514647.1;PREDICTED: probable protein phosphatase 2C 63 [Vigna radiata var. radiata]	13.5	CUUCCGGCGACGCGUCGGCGGCU&UGUUGC--AUGUGUUGUUGGUUU	GO:0004722(protein serine/threonine phosphatase activity);GO:0006464(cellular protein modification process);GO:0044267(cellular protein metabolic process);GO:0008152(metabolic process);GO:1901564(organonitrogen compound metabolic process);GO:0004721(phosphoprotein phosphatase activity);GO:0043412(macromolecule modification);GO:0046872(metal ion binding);GO:0016791(phosphatase activity);GO:0036211…	NA
ahy-MIR3513-p3_1ss5AG	XM_016086998.2	gi|922355420|ref|XP_003611270.2;PPR containing plant-like protein [Medicago truncatula];gi|734408847|gb|KHN34954.1;Pentatricopeptide repeat-containing protein, chloroplastic [Glycine soja]	10	UCGCCGGCGGCAGAAGCAACU&UGUUGCAUGUGUUGUUGGUUU	NA	NA
ahy-MIR3513-p3_1ss5AG	XM_016087005.2	gi|502118696|ref|XP_004496371.1;PREDICTED: 50S ribosomal protein L21, chloroplastic [Cicer arietinum]	11.5	CAACCAGCAACGCA-GCUUGU&UGUUGCAUGUGUUGUUGGUUU	GO:0009059(macromolecule biosynthetic process);GO:0044424(intracellular part);GO:0005739(mitochondrion);GO:0043232(intracellular non-membrane-bounded organelle);GO:0003723(RNA binding);GO:0043043(peptide biosynthetic process);GO:0005762(mitochondrial large ribosomal subunit);GO:0071704(organic substance metabolic process);GO:0005622(intracellular);GO:0006807(nitrogen compound metabolic process);G…	ko03010(Ribosome)
ahy-MIR3513-p3_1ss5AG	XM_016087117.2	gi|571474043|ref|XP_006586107.1;PREDICTED: cell division protein FtsZ homolog 1, chloroplastic-like [Glycine max]	6.5	GAACCCCAAACGCAUGCGACG&UGUUGCAUGUGUUGUUGGUUU	GO:0005623(cell);GO:0035639(purine ribonucleoside triphosphate binding);GO:0005856(cytoskeleton);GO:1901265(nucleoside phosphate binding);GO:0016043(cellular component organization);GO:0032561(guanyl ribonucleotide binding);GO:0005737(cytoplasm);GO:0032550(purine ribonucleoside binding);GO:0017076(purine nucleotide binding);GO:0043226(organelle);GO:0036094(small molecule binding);GO:0003924(GTPas…	NA
ahy-MIR3513-p3_1ss5AG	XM_016087156.2	gi|593686082|ref|XP_007143712.1;hypothetical protein PHAVU_007G095300g [Phaseolus vulgaris]	17	GGGCCAAAAACACUCUGCAAUGCAUGCGGCG&UGUUGCAUGUGUUGU----------UGGUUU	GO:0043226(organelle);GO:1990837(sequence-specific double-stranded DNA binding);GO:0048522(positive regulation of cellular process);GO:0043167(ion binding);GO:0009987(cellular process);GO:0000981(RNA polymerase II transcription factor activity, sequence-specific DNA binding);GO:0001012(RNA polymerase II regulatory region DNA binding);GO:0043234(protein complex);GO:0048518(positive regulation of b…	NA
ahy-MIR3513-p3_1ss5AG	XM_016087404.2	gi|734434364|gb|KHN47392.1;U-box domain-containing protein 17 [Glycine soja];gi|502078401|ref|XP_004485933.1;PREDICTED: U-box domain-containing protein 17 [Cicer arietinum]	10.5	AAGCCAACAGAGCCACA-GCGACA&UGUUGCAUGUG---UUGUUGGUUU	GO:0043226(organelle);GO:0045087(innate immune response);GO:0005623(cell);GO:0043412(macromolecule modification);GO:0036211(protein modification process);GO:0043231(intracellular membrane-bounded organelle);GO:0044464(cell part);GO:0043207(response to external biotic stimulus);GO:0016567(protein ubiquitination);GO:0044424(intracellular part);GO:0004842(ubiquitin-protein transferase activity);GO:0…	NA
ahy-MIR3513-p3_1ss5AG	XM_016087557.2	gi|571500114|ref|XP_006594589.1;PREDICTED: protein SMG7L-like [Glycine max]	8	AGGCCAACAAUUAUGUGCAGCC&UGUUGCAUGUG-UUGUUGGUUU	NA	ko03015(mRNA surveillance pathway)
ahy-MIR3513-p3_1ss5AG	XM_016087629.2	gi|951038227|ref|XP_014517109.1;PREDICTED: plant cysteine oxidase 5-like [Vigna radiata var. radiata]	7	AGACCAGCAACACUAGCAAGA&UGUUGCAUGUGUUGUUGGUUU	GO:0043170(macromolecule metabolic process);GO:0003824(catalytic activity);GO:0036211(protein modification process);GO:0044237(cellular metabolic process);GO:0070482(response to oxygen levels);GO:0051213(dioxygenase activity);GO:0045333(cellular respiration);GO:0070483(detection of hypoxia);GO:0019538(protein metabolic process);GO:0050896(response to stimulus);GO:0009061(anaerobic respiration);GO…	ko00430(Taurine and hypotaurine metabolism);ko01100(Metabolic pathways)
ahy-MIR3513-p3_1ss5AG	XM_016087958.2	gi|527185873|gb|EPS59096.1;hypothetical protein M569_15712 [Genlisea aurea]	9.5	CGCCCAGCUCCACGUGCAGCU&UGUUGCAUGUGUUGUUGGUUU	NA	NA
ahy-MIR3513-p3_1ss5AG	XM_016088172.2	gi|950993885|ref|XP_014505005.1;PREDICTED: protein VACUOLELESS1 [Vigna radiata var. radiata]	14.5	AAACUAACAUUUGCACAAAAUGCAGCA&UGUUGCA---UGUGU---UGUUGGUUU	GO:0044464(cell part);GO:0046907(intracellular transport);GO:0005623(cell);GO:0050794(regulation of cellular process);GO:0051049(regulation of transport);GO:0016197(endosomal transport);GO:0050789(regulation of biological process);GO:0043234(protein complex);GO:0051128(regulation of cellular component organization);GO:0015031(protein transport);GO:0044446(intracellular organelle part);GO:0005737(…	NA
ahy-MIR3513-p3_1ss5AG	XM_016088534.2	gi|743826358|ref|XP_011022779.1;PREDICTED: uncharacterized protein DDB_G0271670-like isoform X1 [Populus euphratica]	9	CCACCAACAACAUCAGCAAUG&UGUUGCAUGUGUUGUUGGUUU	NA	NA
ahy-MIR3513-p3_1ss5AG	XM_016088982.2	gi|502142915|ref|XP_004505151.1;PREDICTED: protein IQ-DOMAIN 14 [Cicer arietinum];gi|920687865|gb|KOM31848.1;hypothetical protein LR48_Vigan01g140400 [Vigna angularis]	8.5	AUGCCAUGAAACAUAUGCAGCU&UGUUGCAUGUGUU-GUUGGUUU	NA	ko03015(mRNA surveillance pathway)
ahy-MIR3513-p3_1ss5AG	XM_016089002.2	gi|356539913|ref|XP_003538437.1;PREDICTED: UDP-glycosyltransferase 76F1-like [Glycine max]	8.5	UAGCCAACA--GCAUGCAGCC&UGUUGCAUGUGUUGUUGGUUU	GO:0044464(cell part);GO:0044238(primary metabolic process);GO:0006082(organic acid metabolic process);GO:0005622(intracellular);GO:0044237(cellular metabolic process);GO:0052696(flavonoid glucuronidation);GO:0009812(flavonoid metabolic process);GO:0080044(quercetin 7-O-glucosyltransferase activity);GO:0005996(monosaccharide metabolic process);GO:0016758(transferase activity, transferring hexosyl…	ko00908(Zeatin biosynthesis);ko00040(Pentose and glucuronate interconversions);ko01110(Biosynthesis of secondary metabolites);ko01100(Metabolic pathways);ko00860(Porphyrin and chlorophyll metabolism);ko00053(Ascorbate and aldarate metabolism)
ahy-MIR3513-p3_1ss5AG	XM_016089594.2	gi|920697446|gb|KOM40671.1;hypothetical protein LR48_Vigan04g086900 [Vigna angularis]	8	GGGCCAGCAACGUGAGCAAUA&UGUUGCAUGUGUUGUUGGUUU	GO:0098660(inorganic ion transmembrane transport);GO:0098662(inorganic cation transmembrane transport);GO:0034220(ion transmembrane transport);GO:0006811(ion transport);GO:0030001(metal ion transport);GO:0015075(ion transmembrane transporter activity);GO:0098655(cation transmembrane transport);GO:0071805(potassium ion transmembrane transport);GO:0044425(membrane part);GO:0016020(membrane);GO:0015…	NA
ahy-MIR3513-p3_1ss5AG	XM_016089934.2	gi|388497120|gb|AFK36626.1;unknown [Lotus japonicus]	12	GAGCC-ACAGCGCGUGCUUGU&UGUUGCAUGUGUUGUUGGUUU	NA	NA
ahy-MIR3513-p3_1ss5AG	XM_016090149.2	gi|645233973|ref|XP_008223594.1;PREDICTED: mitochondrial 37S ribosomal protein S27 [Prunus mume];gi|702315624|ref|XP_010051808.1;PREDICTED: 28S ribosomal protein S33, mitochondrial [Eucalyptus grandis]	11	GGGCCAAGGCAGGCGUGCAGCC&UGUUGCAUGUGU-UGUUGGUUU	GO:0005622(intracellular);GO:0043227(membrane-bounded organelle);GO:0043229(intracellular organelle);GO:0044444(cytoplasmic part);GO:0044424(intracellular part);GO:0043231(intracellular membrane-bounded organelle);GO:0044464(cell part);GO:0043226(organelle);GO:0005737(cytoplasm);GO:0005739(mitochondrion);GO:0005623(cell)	NA
ahy-MIR3513-p3_1ss5AG	XM_016090186.2	gi|356515619|ref|XP_003526496.1;PREDICTED: homeobox-leucine zipper protein ATHB-15-like [Glycine max]	9.5	GGAGUGGCAGCACGUGCAUGCG&UGU-UGCAUGUGUUGUUGGUUU	GO:0043227(membrane-bounded organelle);GO:0043229(intracellular organelle);GO:0097159(organic cyclic compound binding);GO:0044464(cell part);GO:0005634(nucleus);GO:0005488(binding);GO:1901363(heterocyclic compound binding);GO:0008289(lipid binding);GO:0003677(DNA binding);GO:0043231(intracellular membrane-bounded organelle);GO:0044424(intracellular part);GO:0043226(organelle);GO:0005623(cell);GO:…	NA
ahy-MIR3513-p3_1ss5AG	XM_016090367.2	gi|571509674|ref|XP_006596164.1;PREDICTED: DNA topoisomerase 1-like [Glycine max]	4	AGACCUUCGACAUAUGCAACA&UGUUGCAUGUGUUGUUGGUUU	GO:0003916(DNA topoisomerase activity);GO:0016853(isomerase activity);GO:0003824(catalytic activity)	NA
ahy-MIR3513-p3_1ss5AG	XM_016090539.2	gi|388496054|gb|AFK36093.1;unknown [Lotus japonicus];gi|703156927|ref|XP_010111592.1;Ribulose-phosphate 3-epimerase, cytoplasmic isoform [Morus notabilis]	8	ACAGCAACAGCACA-GCAGCC&UGUUGCAUGUGUUGUUGGUUU	GO:0044262(cellular carbohydrate metabolic process);GO:0019693(ribose phosphate metabolic process);GO:0043167(ion binding);GO:0072524(pyridine-containing compound metabolic process);GO:0008152(metabolic process);GO:0044444(cytoplasmic part);GO:0016853(isomerase activity);GO:0044464(cell part);GO:0016052(carbohydrate catabolic process);GO:0005829(cytosol);GO:0034641(cellular nitrogen compound meta…	ko00710(Carbon fixation in photosynthetic organisms);ko01200(Carbon metabolism);ko01230(Biosynthesis of amino acids);ko01110(Biosynthesis of secondary metabolites);ko01100(Metabolic pathways);ko00030(Pentose phosphate pathway);ko00040(Pentose and glucuronate interconversions)
ahy-MIR3513-p3_1ss5AG	XM_016090616.2	gi|356550795|ref|XP_003543769.1;PREDICTED: ABC transporter B family member 19 isoform X1 [Glycine max]	10.5	UGGCGAACGGGGCGUGCAGCU&UGUUGCAUGUGUUGUUGGUUU	GO:0032555(purine ribonucleotide binding);GO:0042221(response to chemical);GO:0043167(ion binding);GO:0022804(active transmembrane transporter activity);GO:0006810(transport);GO:0016818(hydrolase activity, acting on acid anhydrides, in phosphorus-containing anhydrides);GO:0035639(purine ribonucleoside triphosphate binding);GO:0042493(response to drug);GO:0008559(xenobiotic transmembrane transport…	ko02010(ABC transporters)
ahy-MIR3513-p3_1ss5AG	XM_016090847.2	gi|593332066|ref|XP_007139459.1;hypothetical protein PHAVU_008G031500g [Phaseolus vulgaris]	9	AUGCCAUGCAGCACAAAGCAACA&UGUUGC-AUGUGUUGU-UGGUUU	GO:0003824(catalytic activity);GO:0004721(phosphoprotein phosphatase activity);GO:0016791(phosphatase activity);GO:0016787(hydrolase activity);GO:0016788(hydrolase activity, acting on ester bonds);GO:0042578(phosphoric ester hydrolase activity)	NA
ahy-MIR3513-p3_1ss5AG	XM_016090937.2	gi|593269392|ref|XP_007136873.1;hypothetical protein PHAVU_009G081000g [Phaseolus vulgaris]	9.5	GAACUAGCAAUGACAUAUGCAGCA&UGUUGCAUGUGU---UGUUGGUUU	GO:0008152(metabolic process);GO:0006807(nitrogen compound metabolic process);GO:0016810(hydrolase activity, acting on carbon-nitrogen (but not peptide) bonds);GO:0016787(hydrolase activity);GO:0003824(catalytic activity)	ko00250(Alanine, aspartate and glutamate metabolism)
ahy-MIR3513-p3_1ss5AG	XM_016091330.2	gi|363808376|ref|NP_001242257.1;uncharacterized protein LOC100807775 [Glycine max]	12	UAACCAACGAGGGGGAAAACACAUGCAAUG&UGUUGCAUGUGUU---------GUUGGUUU	GO:0016020(membrane)	NA
ahy-MIR3513-p3_1ss5AG	XM_016091500.2	gi|922377162|ref|XP_013458915.1;negative cofactor 2 transcriptional co-repressor, putative [Medicago truncatula]	8	UGGCCAUUGACACUAUGCAGCU&UGUUGCAU-GUGUUGUUGGUUU	GO:0005488(binding);GO:0046983(protein dimerization activity);GO:0043226(organelle);GO:0005515(protein binding);GO:0043227(membrane-bounded organelle);GO:0044424(intracellular part);GO:0044464(cell part);GO:0005623(cell);GO:0005622(intracellular);GO:0043231(intracellular membrane-bounded organelle);GO:0046982(protein heterodimerization activity);GO:0043229(intracellular organelle);GO:0005634(nucl…	NA
ahy-MIR3513-p3_1ss5AG	XM_016091796.2	gi|356520420|ref|XP_003528860.1;PREDICTED: AT-hook motif nuclear-localized protein 9 [Glycine max]	8.5	CUUCCGGCGGCAC-UGUAACA&UGUUGCAUGUGUUGUUGGUUU	GO:1901363(heterocyclic compound binding);GO:0003676(nucleic acid binding);GO:0003677(DNA binding);GO:0005488(binding);GO:0097159(organic cyclic compound binding)	NA
ahy-MIR3513-p3_1ss5AG	XM_016093318.2	gi|965601087|dbj|BAT88265.1;hypothetical protein VIGAN_05172000 [Vigna angularis var. angularis]	5.5	UUACCAGC-AC-CAUGCAACA&UGUUGCAUGUGUUGUUGGUUU	NA	ko00073(Cutin, suberine and wax biosynthesis)
ahy-MIR3513-p3_1ss5AG	XM_016094515.1	gi|71040683|gb|AAZ20290.1;type 2 metallothionein [Arachis hypogaea]	6	GAUCUAACUGCACAUGCGACC&UGUUGCAUGUGUUGUUGGUUU	GO:0043169(cation binding);GO:0046872(metal ion binding);GO:0043167(ion binding);GO:0005488(binding)	NA
ahy-MIR3513-p3_1ss5AG	XM_016094523.2	gi|356504274|ref|XP_003520922.1;PREDICTED: RHOMBOID-like protein 1 [Glycine max]	6	GAACCAGCAGCAACA-GCAACA&UGUUGCAUGU-GUUGUUGGUUU	GO:1901564(organonitrogen compound metabolic process);GO:0004252(serine-type endopeptidase activity);GO:0016021(integral component of membrane);GO:0006807(nitrogen compound metabolic process);GO:0006508(proteolysis);GO:0004175(endopeptidase activity);GO:0017171(serine hydrolase activity);GO:0044238(primary metabolic process);GO:0071704(organic substance metabolic process);GO:0008236(serine-type p…	ko00760(Nicotinate and nicotinamide metabolism);ko00240(Pyrimidine metabolism)
ahy-MIR3513-p3_1ss5AG	XM_016095050.2	gi|593264890|ref|XP_007134623.1;hypothetical protein PHAVU_010G062400g [Phaseolus vulgaris];gi|922365075|ref|XP_013454783.1;F-box/LRR protein [Medicago truncatula]	11	UCGCUAGCCGGCGCGUGCGGCC&UGUUGCAUGUGUUG-UUGGUUU	NA	NA
ahy-MIR3513-p3_1ss5AG	XM_016095344.1	gi|593265282|ref|XP_007134819.1;hypothetical protein PHAVU_010G078900g [Phaseolus vulgaris]	10.5	CAGCUAUGCAACGCAUGUUGCAACA&UGUUGCA---UGUGUUGU-UGGUUU	GO:0046983(protein dimerization activity);GO:0043167(ion binding);GO:0005488(binding);GO:0008152(metabolic process);GO:0043168(anion binding);GO:0005515(protein binding);GO:0036094(small molecule binding);GO:0016597(amino acid binding);GO:0031406(carboxylic acid binding);GO:0043177(organic acid binding)	NA
ahy-MIR3513-p3_1ss5AG	XM_016096225.2	gi|388515173|gb|AFK45648.1;unknown [Lotus japonicus]	9.5	GCCUCGGCAACAUAUGCAGAA&UGUUGCAUGUGUUGUUGGUUU	NA	NA
ahy-MIR3513-p3_1ss5AG	XM_016096242.2	gi|356544700|ref|XP_003540785.1;PREDICTED: arogenate dehydratase/prephenate dehydratase 6, chloroplastic-like [Glycine max]	10	UCGCCAGC-GCACGCGCGGCA&UGUUGCAUGUGUUGUUGGUUU	GO:0044249(cellular biosynthetic process);GO:0031406(carboxylic acid binding);GO:0044424(intracellular part);GO:0016053(organic acid biosynthetic process);GO:0009532(plastid stroma);GO:0009058(biosynthetic process);GO:0009507(chloroplast);GO:0044238(primary metabolic process);GO:0009570(chloroplast stroma);GO:0044422(organelle part);GO:0044446(intracellular organelle part);GO:1901564(organonitrog…	ko01100(Metabolic pathways);ko01110(Biosynthesis of secondary metabolites);ko01230(Biosynthesis of amino acids);ko00400(Phenylalanine, tyrosine and tryptophan biosynthesis)
ahy-MIR3513-p3_1ss5AG	XM_016096293.2	gi|965603332|dbj|BAT90509.1;hypothetical protein VIGAN_06176500 [Vigna angularis var. angularis]	9	UUUCCACACACGCACAUGCGGCA&UGUUGCAUGUGU-UGU-UGGUUU	GO:0031224(intrinsic component of membrane);GO:0016021(integral component of membrane);GO:0044425(membrane part);GO:0016020(membrane)	NA
ahy-MIR3513-p3_1ss5AG	XM_016096570.2	gi|965603717|dbj|BAT90894.1;hypothetical protein VIGAN_06218600 [Vigna angularis var. angularis];gi|920708867|gb|KOM50864.1;hypothetical protein LR48_Vigan08g169100 [Vigna angularis]	8.5	AGGCCAAUAAUACCGGUGUAACA&UGUUGCAU--GUGUUGUUGGUUU	GO:0019538(protein metabolic process);GO:0031325(positive regulation of cellular metabolic process);GO:0009893(positive regulation of metabolic process);GO:0044260(cellular macromolecule metabolic process);GO:0005488(binding);GO:0043412(macromolecule modification);GO:0004842(ubiquitin-protein transferase activity);GO:0030163(protein catabolic process);GO:0032436(positive regulation of proteasomal…	NA
ahy-MIR3513-p3_1ss5AG	XM_016096897.2	gi|947076036|gb|KRH24876.1;hypothetical protein GLYMA_12G068100 [Glycine max]	8.5	CGGCCUGACAACACGUGGGACC&UGUUGCAUGUGUUGUU-GGUUU	GO:1901360(organic cyclic compound metabolic process);GO:0016070(RNA metabolic process);GO:0006725(cellular aromatic compound metabolic process);GO:0071704(organic substance metabolic process);GO:0006807(nitrogen compound metabolic process);GO:0006139(nucleobase-containing compound metabolic process);GO:0005488(binding);GO:0044237(cellular metabolic process);GO:0034641(cellular nitrogen compound …	NA
ahy-MIR3513-p3_1ss5AG	XM_016097161.2	gi|571488010|ref|XP_006590809.1;PREDICTED: MAP3K epsilon protein kinase 1-like isoform X5 [Glycine max]	8.5	CUGCCAACAGGACAU-CGACA&UGUUGCAUGUGUUGUUGGUUU	GO:0065007(biological regulation);GO:0007165(signal transduction);GO:0004702(signal transducer, downstream of receptor, with serine/threonine kinase activity);GO:0006468(protein phosphorylation);GO:0016301(kinase activity);GO:0071704(organic substance metabolic process);GO:0016773(phosphotransferase activity, alcohol group as acceptor);GO:0004672(protein kinase activity);GO:0016310(phosphorylatio…	ko04626(Plant-pathogen interaction);ko04016(MAPK signaling pathway - plant)
ahy-MIR3513-p3_1ss5AG	XM_016097808.2	gi|356567418|ref|XP_003551917.1;PREDICTED: mitogen-activated protein kinase 20 isoform X1 [Glycine max]	6.5	CAGGCAACAACACAUGGUCAACA&UGUUG--CAUGUGUUGUUGGUUU	GO:0006796(phosphate-containing compound metabolic process);GO:0005057(signal transducer activity, downstream of receptor);GO:0051716(cellular response to stimulus);GO:0050789(regulation of biological process);GO:0035639(purine ribonucleoside triphosphate binding);GO:0050794(regulation of cellular process);GO:0004672(protein kinase activity);GO:0003824(catalytic activity);GO:0004871(signal transd…	ko04016(MAPK signaling pathway - plant)
ahy-MIR3513-p3_1ss5AG	XM_016097871.2	gi|734415285|gb|KHN37697.1;Ribosome-recycling factor [Glycine soja]	8.5	UGACCAAAGAGCACAUGCAGGC&UGUUGCAUGUGUU-GUUGGUUU	GO:0070126(mitochondrial translational termination);GO:0043226(organelle);GO:0043603(cellular amide metabolic process);GO:0043624(cellular protein complex disassembly);GO:0043227(membrane-bounded organelle);GO:0044238(primary metabolic process);GO:0044444(cytoplasmic part);GO:0043604(amide biosynthetic process);GO:0010467(gene expression);GO:0008152(metabolic process);GO:0044237(cellular metaboli…	NA
ahy-MIR3513-p3_1ss5AG	XM_016098055.2	gi|571482330|ref|XP_006588921.1;PREDICTED: DNA-directed RNA polymerase I subunit 1-like [Glycine max]	8	GAACCAGCAACACAAAUGACC&UGUUGCAUGUGUUGUUGGUUU	GO:0009059(macromolecule biosynthetic process);GO:0031981(nuclear lumen);GO:0006351(transcription, DNA-templated);GO:0046483(heterocycle metabolic process);GO:0043232(intracellular non-membrane-bounded organelle);GO:0046914(transition metal ion binding);GO:0044260(cellular macromolecule metabolic process);GO:0043231(intracellular membrane-bounded organelle);GO:0005622(intracellular);GO:0043227(me…	ko00230(Purine metabolism);ko00240(Pyrimidine metabolism);ko03020(RNA polymerase);ko01100(Metabolic pathways)
ahy-MIR3513-p3_1ss5AG	XM_016098277.2	gi|920708311|gb|KOM50308.1;hypothetical protein LR48_Vigan08g113500 [Vigna angularis]	23	CACCCAACAGCCUACUUAUUACAUGCAGCA&UGUUGCAUGU---------GUUGUUGGUUU	NA	ko00380(Tryptophan metabolism);ko01100(Metabolic pathways)
ahy-MIR3513-p3_1ss5AG	XM_016098370.2	gi|357517795|ref|XP_003629186.1;adipocyte plasma membrane-associated-like protein [Medicago truncatula];gi|734379216|gb|KHN22380.1;hypothetical protein glysoja_024889 [Glycine soja]	8.5	CUCGCAACGACAACAUGCGACG&UGUUGCAUGU-GUUGUUGGUUU	GO:0051252(regulation of RNA metabolic process);GO:0005737(cytoplasm);GO:0051171(regulation of nitrogen compound metabolic process);GO:0003676(nucleic acid binding);GO:0097159(organic cyclic compound binding);GO:0065007(biological regulation);GO:0031323(regulation of cellular metabolic process);GO:2001141(regulation of RNA biosynthetic process);GO:0003690(double-stranded DNA binding);GO:0043227(m…	ko01110(Biosynthesis of secondary metabolites);ko01100(Metabolic pathways);ko00901(Indole alkaloid biosynthesis)
ahy-MIR3513-p3_1ss5AG	XM_016099074.2	gi|356516635|ref|XP_003526999.1;PREDICTED: serine/threonine-protein kinase HT1-like [Glycine max]	10	AAACCUCCAGGCAGCAUAUGCUGCA&UGUUGCAUGUGUUGUU----GGUUU	GO:0003824(catalytic activity);GO:0065009(regulation of molecular function);GO:0004871(signal transducer activity);GO:0004674(protein serine/threonine kinase activity);GO:0036094(small molecule binding);GO:0051347(positive regulation of transferase activity);GO:0005488(binding);GO:0071900(regulation of protein serine/threonine kinase activity);GO:0035639(purine ribonucleoside triphosphate binding…	NA
ahy-MIR3513-p3_1ss5AG	XM_016099366.2	gi|970011546|ref|XP_015066690.1;PREDICTED: CBL-interacting serine/threonine-protein kinase 23 [Solanum pennellii];gi|356530563|ref|XP_003533850.1;PREDICTED: CBL-interacting serine/threonine-protein kinase 23 [Glycine max];gi|950976563|ref|XP_014501312.1;PREDICTED: CBL-interacting serine/threonine-protein kinase 23-like [Vigna radiata var. radiata];gi|694363261|ref|XP_009360934.1;PREDICTED: CBL-in…	22.5	CGACCAACAGCGGAAGGACACGUGUCGGCA&UGUUG-CAUGUGU--------UGUUGGUUU	GO:0016773(phosphotransferase activity, alcohol group as acceptor);GO:0043229(intracellular organelle);GO:0023052(signaling);GO:0055085(transmembrane transport);GO:0005829(cytosol);GO:0006950(response to stress);GO:0006793(phosphorus metabolic process);GO:0009991(response to extracellular stimulus);GO:0010118(stomatal movement);GO:0006813(potassium ion transport);GO:0031667(response to nutrient l…	NA
ahy-MIR3513-p3_1ss5AG	XM_016099641.2	gi|356556579|ref|XP_003546602.1;PREDICTED: uncharacterized protein LOC100815807 [Glycine max]	11	GAGCCUGGCAGCAUGUGCGGUU&UGUUGCAUGUGUUGUU-GGUUU	NA	NA
ahy-MIR3513-p3_1ss5AG	XM_016099722.2	gi|955334093|ref|XP_006584795.2;PREDICTED: probable zinc protease PqqL [Glycine max];gi|920718670|gb|KOM57867.1;hypothetical protein LR48_Vigan11g090000 [Vigna angularis];gi|955321928|ref|XP_006580490.2;PREDICTED: probable zinc protease PqqL isoform X1 [Glycine max]	6.5	AAAUUAAGGACAUCAUGCAGCU&UGUUGCAUG-UGUUGUUGGUUU	GO:0006807(nitrogen compound metabolic process);GO:0070011(peptidase activity, acting on L-amino acid peptides);GO:0008233(peptidase activity);GO:0004222(metalloendopeptidase activity);GO:0005488(binding);GO:0043170(macromolecule metabolic process);GO:0004175(endopeptidase activity);GO:0003824(catalytic activity);GO:0071704(organic substance metabolic process);GO:0019538(protein metabolic process…	NA
ahy-MIR3513-p3_1ss5AG	XM_016100142.2	gi|823179873|ref|XP_012487635.1;PREDICTED: microtubule-associated protein 1B-like [Gossypium raimondii]	8	GAAGCAGCAGCAGCA-GCAGCA&UGUUGCAUG-UGUUGUUGGUUU	GO:0046914(transition metal ion binding);GO:0044424(intracellular part);GO:0005623(cell);GO:0030001(metal ion transport);GO:0030003(cellular cation homeostasis);GO:0048878(chemical homeostasis);GO:0006811(ion transport);GO:0009987(cellular process);GO:0019725(cellular homeostasis);GO:0051234(establishment of localization);GO:0098771(inorganic ion homeostasis);GO:0051179(localization);GO:0055082(c…	NA
ahy-MIR3513-p3_1ss5AG	XM_016100244.2	gi|571476920|ref|XP_006587114.1;PREDICTED: APO protein 2, chloroplastic-like [Glycine max]	12	ACACCAACAACGCAAUGGGCAGCA&UGUUGC---AUGUGUUGUUGGUUU	GO:0097159(organic cyclic compound binding);GO:0005488(binding);GO:0003676(nucleic acid binding);GO:0003723(RNA binding);GO:1901363(heterocyclic compound binding)	ko01100(Metabolic pathways);ko01110(Biosynthesis of secondary metabolites);ko00500(Starch and sucrose metabolism)
ahy-MIR3513-p3_1ss5AG	XM_016100269.2	gi|947115590|gb|KRH63892.1;hypothetical protein GLYMA_04G202600 [Glycine max];gi|593328794|ref|XP_007137824.1;hypothetical protein PHAVU_009G158800g [Phaseolus vulgaris]	9.5	UCCCCAGCAACAAGAGCAACA&UGUUGCAUGUGUUGUUGGUUU	NA	NA
ahy-MIR3513-p3_1ss5AG	XM_016100410.2	gi|502139879|ref|XP_004503950.1;PREDICTED: probable pectinesterase/pectinesterase inhibitor 51 [Cicer arietinum]	7.5	ACGCCAACGACACAUCCAAGG&UGUUGCAUGUGUUGUUGGUUU	GO:0005976(polysaccharide metabolic process);GO:0045490(pectin catabolic process);GO:0009987(cellular process);GO:0046910(pectinesterase inhibitor activity);GO:0044092(negative regulation of molecular function);GO:0071944(cell periphery);GO:0065007(biological regulation);GO:0016787(hydrolase activity);GO:0042545(cell wall modification);GO:0071555(cell wall organization);GO:0005623(cell);GO:007184…	ko01100(Metabolic pathways);ko00040(Pentose and glucuronate interconversions)
ahy-MIR3513-p3_1ss5AG	XM_016100778.2	gi|593695509|ref|XP_007148253.1;hypothetical protein PHAVU_006G192900g [Phaseolus vulgaris]	5.5	ACAUCAACAAUAACAUGCAACA&UGUUGCAUGU-GUUGUUGGUUU	NA	NA
ahy-MIR3513-p3_1ss5AG	XM_016101116.2	gi|955303682|ref|XP_014631739.1;PREDICTED: uncharacterized protein LOC100814070 isoform X3 [Glycine max];gi|947129242|gb|KRH77096.1;hypothetical protein GLYMA_01G192200 [Glycine max];gi|659079631|ref|XP_008440359.1;PREDICTED: uncharacterized protein LOC103484834 [Cucumis melo]	12	CCGCCGACAACACGUGGAUCGACG&UGUUG---CAUGUGUUGUUGGUUU	GO:0051248(negative regulation of protein metabolic process);GO:0004540(ribonuclease activity);GO:0051716(cellular response to stimulus);GO:0009987(cellular process);GO:0016893(endonuclease activity, active with either ribo- or deoxyribonucleic acids and producing 5'-phosphomonoesters);GO:0010467(gene expression);GO:1901699(cellular response to nitrogen compound);GO:0043170(macromolecule metaboli…	NA
ahy-MIR3513-p3_1ss5AG	XM_016101277.2	gi|356569531|ref|XP_003552953.1;PREDICTED: protease Do-like 7 [Glycine max]	5	AAAUGGCACAACACAUGCAAUU&UGUUGCAUGUGUUGU-UGGUUU	GO:0008233(peptidase activity);GO:0008236(serine-type peptidase activity);GO:0070011(peptidase activity, acting on L-amino acid peptides);GO:0044238(primary metabolic process);GO:0004175(endopeptidase activity);GO:0016787(hydrolase activity);GO:1901564(organonitrogen compound metabolic process);GO:0004252(serine-type endopeptidase activity);GO:0071704(organic substance metabolic process);GO:00038…	ko00330(Arginine and proline metabolism)
ahy-MIR3513-p3_1ss5AG	XM_016102024.2	gi|965657627|dbj|BAT74046.1;hypothetical protein VIGAN_01163300 [Vigna angularis var. angularis]	8.5	CUGCCAACAACACCAACAACA&UGUUGCAUGUGUUGUUGGUUU	NA	ko04626(Plant-pathogen interaction);ko04016(MAPK signaling pathway - plant)
ahy-MIR3513-p3_1ss5AG	XM_016102748.2	gi|357518653|ref|XP_003629615.1;microfibrillar-associated-like protein [Medicago truncatula]	10	UCGCCGGCGGCAGAAGCAACU&UGUUGCAUGUGUUGUUGGUUU	GO:0031012(extracellular matrix);GO:0099512(supramolecular fiber);GO:0099080(supramolecular complex);GO:0005576(extracellular region);GO:0044421(extracellular region part);GO:0099081(supramolecular polymer)	NA
ahy-MIR3513-p3_1ss5AG	XM_016103012.2	-	8.5	CAGCCAUCAUACAUAUGCGGCU&UGUUGCAUGUGU-UGUUGGUUU	NA	NA
ahy-MIR3513-p3_1ss5AG	XM_016103020.2	-	8.5	CAGCCAUCAUACAUAUGCGGCU&UGUUGCAUGUGU-UGUUGGUUU	NA	NA
ahy-MIR3513-p3_1ss5AG	XM_016103177.2	gi|922388418|ref|XP_013462739.1;eukaryotic aspartyl protease family protein [Medicago truncatula]	8	GCUCCAACAACACCUGCGGCG&UGUUGCAUGUGUUGUUGGUUU	GO:0016787(hydrolase activity);GO:0070011(peptidase activity, acting on L-amino acid peptides);GO:0003824(catalytic activity);GO:0006508(proteolysis);GO:0004175(endopeptidase activity);GO:0019538(protein metabolic process);GO:0008152(metabolic process);GO:1901564(organonitrogen compound metabolic process);GO:0070001(aspartic-type peptidase activity);GO:0006807(nitrogen compound metabolic process)…	ko03010(Ribosome)
ahy-MIR3513-p3_1ss5AG	XM_016103212.2	gi|951044740|ref|XP_014518729.1;PREDICTED: BI1-like protein [Vigna radiata var. radiata]	11.5	GGACCAGCAGCUCAUGCUAUU&UGUUGCAUGUGUUGUUGGUUU	GO:0031224(intrinsic component of membrane);GO:0016020(membrane);GO:0044425(membrane part);GO:0016021(integral component of membrane)	NA
ahy-MIR3513-p3_1ss5AG	XM_016103529.2	gi|502079291|ref|XP_004486214.1;PREDICTED: transcription initiation factor IIF subunit alpha [Cicer arietinum];gi|593694278|ref|XP_007147660.1;hypothetical protein PHAVU_006G143600g [Phaseolus vulgaris];gi|965600349|dbj|BAT87527.1;hypothetical protein VIGAN_05090900 [Vigna angularis var. angularis]	14.5	AAACCAGCAGCAGCAGGGGCAACU&UGUUGC---AUGUGUUGUUGGUUU	GO:0043226(organelle);GO:0005623(cell);GO:0031224(intrinsic component of membrane);GO:0031328(positive regulation of cellular biosynthetic process);GO:0010628(positive regulation of gene expression);GO:0044424(intracellular part);GO:0043231(intracellular membrane-bounded organelle);GO:0009893(positive regulation of metabolic process);GO:0051252(regulation of RNA metabolic process);GO:0031325(posi…	ko03022(Basal transcription factors)
ahy-MIR3513-p3_1ss5AG	XM_016103550.2	gi|920712045|gb|KOM53294.1;hypothetical protein LR48_Vigan09g195300 [Vigna angularis]	5.5	AGACCAAGAACAACA-GCAACA&UGUUGCAUGU-GUUGUUGGUUU	NA	NA
ahy-MIR3513-p3_1ss5AG	XM_016104330.2	gi|920681039|gb|KOM27859.1;hypothetical protein LR48_Vigan468s002100 [Vigna angularis]	16	ACACCAACAACACUUCUCAAUGCAAACA&UGUU-GCAU------GUGUUGUUGGUUU	NA	NA
ahy-MIR3513-p3_1ss5AG	XM_016104361.2	gi|950974914|ref|XP_014501007.1;PREDICTED: eukaryotic initiation factor 4A-3 [Vigna radiata var. radiata]	9	GUCUCAGCAAUGCAUGGCGACA&UGUUGC-AUGUGUUGUUGGUUU	GO:0032555(purine ribonucleotide binding);GO:0005488(binding);GO:0032559(adenyl ribonucleotide binding);GO:0097159(organic cyclic compound binding);GO:0036094(small molecule binding);GO:0016817(hydrolase activity, acting on acid anhydrides);GO:0004386(helicase activity);GO:0030554(adenyl nucleotide binding);GO:0016818(hydrolase activity, acting on acid anhydrides, in phosphorus-containing anhydri…	ko03015(mRNA surveillance pathway);ko03040(Spliceosome);ko03013(RNA transport)
ahy-MIR3513-p3_1ss5AG	XM_016104757.2	gi|922369277|ref|XP_013456803.1;glycoside hydrolase family 17 protein [Medicago truncatula]	19	GGACCAAC-ACACUUUGUGGGGUGCAACA&UGUUGCAU--------GUGUUGUUGGUUU	GO:0044238(primary metabolic process);GO:0016798(hydrolase activity, acting on glycosyl bonds);GO:0005975(carbohydrate metabolic process);GO:0016021(integral component of membrane);GO:0031224(intrinsic component of membrane);GO:0071704(organic substance metabolic process);GO:0004553(hydrolase activity, hydrolyzing O-glycosyl compounds);GO:0016020(membrane);GO:0003824(catalytic activity);GO:001678…	ko00500(Starch and sucrose metabolism)
ahy-MIR3513-p3_1ss5AG	XM_016104757.2	gi|922369277|ref|XP_013456803.1;glycoside hydrolase family 17 protein [Medicago truncatula]	11.5	AUUCCAGCAGCAACCAUGUGGCA&UGUUGCAUG--UGUUGUUGGUUU	GO:0044238(primary metabolic process);GO:0016798(hydrolase activity, acting on glycosyl bonds);GO:0005975(carbohydrate metabolic process);GO:0016021(integral component of membrane);GO:0031224(intrinsic component of membrane);GO:0071704(organic substance metabolic process);GO:0004553(hydrolase activity, hydrolyzing O-glycosyl compounds);GO:0016020(membrane);GO:0003824(catalytic activity);GO:001678…	ko00500(Starch and sucrose metabolism)
ahy-MIR3513-p3_1ss5AG	XM_016105061.2	gi|823253409|ref|XP_012459327.1;PREDICTED: V-type proton ATPase subunit D [Gossypium raimondii]	14.5	UGGCCCGGGGUGGACAGCAGGUGCAGCA&UGUUGCAUGUGUUGUU-------GGUUU	GO:0043492(ATPase activity, coupled to movement of substances);GO:0043229(intracellular organelle);GO:0051234(establishment of localization);GO:0017111(nucleoside-triphosphatase activity);GO:0042623(ATPase activity, coupled);GO:0043231(intracellular membrane-bounded organelle);GO:0044422(organelle part);GO:0098805(whole membrane);GO:0044437(vacuolar part);GO:0044464(cell part);GO:0005773(vacuole)…	ko04145(Phagosome);ko01100(Metabolic pathways);ko00190(Oxidative phosphorylation)
ahy-MIR3513-p3_1ss5AG	XM_016105155.2	gi|734331314|gb|KHN06987.1;Rop guanine nucleotide exchange factor 1 [Glycine soja]	9.5	UUCCCAGCAGCAGCA-GCAGCA&UGUUGCAUG-UGUUGUUGGUUU	GO:0005088(Ras guanyl-nucleotide exchange factor activity);GO:0050790(regulation of catalytic activity);GO:0065007(biological regulation);GO:0005085(guanyl-nucleotide exchange factor activity);GO:0051336(regulation of hydrolase activity);GO:0044093(positive regulation of molecular function);GO:0043087(regulation of GTPase activity);GO:0098772(molecular function regulator);GO:0051345(positive regu…	NA
ahy-MIR3513-p3_1ss5AG	XM_016105402.2	gi|951073294|ref|XP_014492101.1;PREDICTED: ribosome maturation protein SBDS [Vigna radiata var. radiata]	7.5	AAACAAGUGCAGCACAUGCAAUG&UGUUGCAUGUGUUGU--UGGUUU	GO:0034641(cellular nitrogen compound metabolic process);GO:0005737(cytoplasm);GO:0009987(cellular process);GO:0003723(RNA binding);GO:0043231(intracellular membrane-bounded organelle);GO:0005488(binding);GO:0016043(cellular component organization);GO:0042255(ribosome assembly);GO:0006996(organelle organization);GO:0070925(organelle assembly);GO:0003676(nucleic acid binding);GO:0043933(macromolec…	ko03008(Ribosome biogenesis in eukaryotes)
ahy-MIR3513-p3_1ss5AG	XM_016106203.2	gi|950962191|ref|XP_014498037.1;PREDICTED: DEAD-box ATP-dependent RNA helicase 8-like [Vigna radiata var. radiata]	14.5	GAAUCAGCAACAACAUCAACAGCAGCA&UGUUGC-----AUGU-GUUGUUGGUUU	GO:0016462(pyrophosphatase activity);GO:0032553(ribonucleotide binding);GO:0004386(helicase activity);GO:0016787(hydrolase activity);GO:0005524(ATP binding);GO:0003676(nucleic acid binding);GO:0097367(carbohydrate derivative binding);GO:0017076(purine nucleotide binding);GO:0043167(ion binding);GO:0043168(anion binding);GO:0003824(catalytic activity);GO:1901363(heterocyclic compound binding);GO:0…	ko03018(RNA degradation)
ahy-MIR3513-p3_1ss5AG	XM_016106529.2	gi|661881573|emb|CDP14733.1;unnamed protein product [Coffea canephora]	15.5	GGACGAGCACACAAGCGCAUGCAAUA&UGUUGCAUGUGU-----UGUUGGUUU	GO:0009059(macromolecule biosynthetic process);GO:0044237(cellular metabolic process);GO:0005739(mitochondrion);GO:0044464(cell part);GO:0009058(biosynthetic process);GO:0030529(intracellular ribonucleoprotein complex);GO:1901576(organic substance biosynthetic process);GO:0019538(protein metabolic process);GO:0043043(peptide biosynthetic process);GO:0010467(gene expression);GO:0044424(intracellul…	ko03010(Ribosome)
ahy-MIR3513-p3_1ss5AG	XM_016106625.2	gi|356536388|ref|XP_003536720.1;PREDICTED: probable protein phosphatase 2C 64 [Glycine max];gi|802633892|ref|XP_012077728.1;PREDICTED: probable protein phosphatase 2C 60 [Jatropha curcas]	7.5	AAGAGAGCAACACAUGCAAUU&UGUUGCAUGUGUUGUUGGUUU	GO:0006793(phosphorus metabolic process);GO:0004722(protein serine/threonine phosphatase activity);GO:0008152(metabolic process);GO:0016311(dephosphorylation);GO:0006470(protein dephosphorylation);GO:1901564(organonitrogen compound metabolic process);GO:0046872(metal ion binding);GO:0044237(cellular metabolic process);GO:0043167(ion binding);GO:0016791(phosphatase activity);GO:0031224(intrinsic c…	NA
ahy-MIR3513-p3_1ss5AG	XM_016107086.2	gi|388508922|gb|AFK42527.1;unknown [Lotus japonicus]	9.5	GGGCCAACAUUAUAUGCGAAU&UGUUGCAUGUGUUGUUGGUUU	NA	NA
ahy-MIR3513-p3_1ss5AG	XM_016107778.2	gi|356496275|ref|XP_003516994.1;PREDICTED: binding partner of ACD11 1-like [Glycine max]	9	AGACCAAAUCGGCAUUUGCAGCU&UGUUGCAUGUGUUG--UUGGUUU	GO:1901265(nucleoside phosphate binding);GO:0036094(small molecule binding);GO:1901363(heterocyclic compound binding);GO:0003676(nucleic acid binding);GO:0097159(organic cyclic compound binding);GO:0000166(nucleotide binding);GO:0005488(binding)	NA
ahy-MIR3513-p3_1ss5AG	XM_016107863.2	gi|593790644|ref|XP_007158361.1;hypothetical protein PHAVU_002G146400g [Phaseolus vulgaris]	9	CCACCGGCAGC-CA-GCAGCA&UGUUGCAUGUGUUGUUGGUUU	GO:0051171(regulation of nitrogen compound metabolic process);GO:0043226(organelle);GO:0080090(regulation of primary metabolic process);GO:0031326(regulation of cellular biosynthetic process);GO:0048856(anatomical structure development);GO:0003677(DNA binding);GO:0003676(nucleic acid binding);GO:0032502(developmental process);GO:0009889(regulation of biosynthetic process);GO:2001141(regulation of…	NA
ahy-MIR3513-p3_1ss5AG	XM_016107995.2	gi|356495293|ref|XP_003516513.1;PREDICTED: subtilisin-like protease SBT5.3 [Glycine max];gi|502161828|ref|XP_004512297.1;PREDICTED: subtilisin-like protease SBT5.3 isoform X1 [Cicer arietinum]	9	GAGACAACAGCACAUGUGAUG&UGUUGCAUGUGUUGUUGGUUU	GO:0044238(primary metabolic process);GO:0017171(serine hydrolase activity);GO:0044464(cell part);GO:0004252(serine-type endopeptidase activity);GO:0005618(cell wall);GO:0019538(protein metabolic process);GO:0006807(nitrogen compound metabolic process);GO:0071704(organic substance metabolic process);GO:0070011(peptidase activity, acting on L-amino acid peptides);GO:0008236(serine-type peptidase a…	ko00520(Amino sugar and nucleotide sugar metabolism);ko03008(Ribosome biogenesis in eukaryotes);ko03018(RNA degradation);ko01100(Metabolic pathways);ko04146(Peroxisome)
ahy-MIR3513-p3_1ss5AG	XM_016108148.2	gi|356497107|ref|XP_003517405.1;PREDICTED: phospholipase A1-Ibeta2, chloroplastic [Glycine max]	13	UGGCCGAUGAGAUAAGCACGUGCAGCC&UGUUGCAUGUGUU------GUUGGUUU	GO:0008152(metabolic process);GO:0016787(hydrolase activity);GO:0003824(catalytic activity);GO:0044238(primary metabolic process);GO:0006629(lipid metabolic process);GO:0071704(organic substance metabolic process)	ko01100(Metabolic pathways);ko00564(Glycerophospholipid metabolism);ko00592(alpha-Linolenic acid metabolism);ko01110(Biosynthesis of secondary metabolites)
ahy-MIR3513-p3_1ss5AG	XM_016108261.2	gi|734314297|gb|KHN01700.1;Transcription factor bHLH25 [Glycine soja]	9	CCACCAACAAUAUAUAGUAGCG&UGUUGC-AUGUGUUGUUGGUUU	NA	ko01210(2-Oxocarboxylic acid metabolism);ko04075(Plant hormone signal transduction);ko01230(Biosynthesis of amino acids);ko00630(Glyoxylate and dicarboxylate metabolism);ko00020(Citrate cycle (TCA cycle));ko04016(MAPK signaling pathway - plant);ko01110(Biosynthesis of secondary metabolites);ko01200(Carbon metabolism);ko01100(Metabolic pathways)
ahy-MIR3513-p3_1ss5AG	XM_016108539.2	gi|351722861|ref|NP_001235211.1;uncharacterized protein LOC100305681 [Glycine max]	7.5	CGACCGUGCAGCAC-UGCAGCA&UGUUGCAUGUGUUGU-UGGUUU	NA	NA
ahy-MIR3513-p3_1ss5AG	XM_016108574.2	gi|694447103|ref|XP_009349751.1;PREDICTED: BES1/BZR1 homolog protein 2-like [Pyrus x bretschneideri]	8.5	AAACCAGCAAUGCA-GCAGAU&UGUUGCAUGUGUUGUUGGUUU	GO:0006355(regulation of transcription, DNA-templated);GO:0010468(regulation of gene expression);GO:0010033(response to organic substance);GO:0060255(regulation of macromolecule metabolic process);GO:0031323(regulation of cellular metabolic process);GO:0009725(response to hormone);GO:0051252(regulation of RNA metabolic process);GO:1903506(regulation of nucleic acid-templated transcription);GO:003…	ko04075(Plant hormone signal transduction)
ahy-MIR3513-p3_1ss5AG	XM_016108773.2	gi|734407624|gb|KHN34430.1;Scarecrow-like protein 28 [Glycine soja]	9	ACAGCAACAGCACCAGCGACA&UGUUGCAUGUGUUGUUGGUUU	GO:0003677(DNA binding);GO:0003676(nucleic acid binding);GO:0009889(regulation of biosynthetic process);GO:0031323(regulation of cellular metabolic process);GO:0051171(regulation of nitrogen compound metabolic process);GO:0043229(intracellular organelle);GO:0006355(regulation of transcription, DNA-templated);GO:0031326(regulation of cellular biosynthetic process);GO:0010556(regulation of macromol…	ko04075(Plant hormone signal transduction)
ahy-MIR3513-p3_1ss5AG	XM_016108886.2	gi|356540489|ref|XP_003538721.1;PREDICTED: AT-hook motif nuclear-localized protein 24-like [Glycine max]	10	UGGUCAGCAGCAUGCGCAGCA&UGUUGCAUGUGUUGUUGGUUU	GO:0003677(DNA binding);GO:0097159(organic cyclic compound binding);GO:1901363(heterocyclic compound binding);GO:0003676(nucleic acid binding);GO:0005488(binding)	NA
ahy-MIR3513-p3_1ss5AG	XM_016109112.2	gi|955304218|ref|XP_014632792.1;PREDICTED: far upstream element-binding protein 2-like isoform X1 [Glycine max];gi|955304220|ref|XP_014632793.1;PREDICTED: far upstream element-binding protein 1-like isoform X2 [Glycine max]	16	CACCCAACAGCAUAUGAUUAUCAGCA&UGUUG-----CAUGUGUUGUUGGUUU	GO:0005488(binding);GO:1901363(heterocyclic compound binding);GO:0097159(organic cyclic compound binding);GO:0003676(nucleic acid binding);GO:0003723(RNA binding)	NA
ahy-MIR3513-p3_1ss5AG	XM_016109113.2	gi|955304218|ref|XP_014632792.1;PREDICTED: far upstream element-binding protein 2-like isoform X1 [Glycine max];gi|955304220|ref|XP_014632793.1;PREDICTED: far upstream element-binding protein 1-like isoform X2 [Glycine max]	16	CACCCAACAGCAUAUGAUUAUCAGCA&UGUUG-----CAUGUGUUGUUGGUUU	GO:0005488(binding);GO:1901363(heterocyclic compound binding);GO:0097159(organic cyclic compound binding);GO:0003676(nucleic acid binding);GO:0003723(RNA binding)	NA
ahy-MIR3513-p3_1ss5AG	XM_016109210.2	gi|351723189|ref|NP_001237270.1;4-coumarate:CoA ligase isoenzyme 3 [Glycine max]	8	AACCCAACAACAACA-GCAGCA&UGUUGCAUGU-GUUGUUGGUUU	GO:0000166(nucleotide binding);GO:0043167(ion binding);GO:0016877(ligase activity, forming carbon-sulfur bonds);GO:0009698(phenylpropanoid metabolic process);GO:0016874(ligase activity);GO:0071704(organic substance metabolic process);GO:0036094(small molecule binding);GO:0016207(4-coumarate-CoA ligase activity);GO:0032553(ribonucleotide binding);GO:0097159(organic cyclic compound binding);GO:0006…	ko01100(Metabolic pathways);ko01110(Biosynthesis of secondary metabolites);ko00360(Phenylalanine metabolism);ko00940(Phenylpropanoid biosynthesis);ko00130(Ubiquinone and other terpenoid-quinone biosynthesis)
ahy-MIR3513-p3_1ss5AG	XM_016109276.2	gi|951052467|ref|XP_014520711.1;PREDICTED: ARM REPEAT PROTEIN INTERACTING WITH ABF2 [Vigna radiata var. radiata];gi|571436829|ref|XP_006573888.1;PREDICTED: ARM REPEAT PROTEIN INTERACTING WITH ABF2-like [Glycine max]	10.5	CUACCGGCGACGCCCGCGACG&UGUUGCAUGUGUUGUUGGUUU	GO:0043231(intracellular membrane-bounded organelle);GO:0043229(intracellular organelle);GO:0005622(intracellular);GO:0044424(intracellular part);GO:0005623(cell);GO:0005634(nucleus);GO:0044464(cell part);GO:0043226(organelle);GO:0005737(cytoplasm);GO:0043227(membrane-bounded organelle)	ko03018(RNA degradation)
ahy-MIR3513-p3_1ss5AG	XM_016109679.2	gi|571519170|ref|XP_006597798.1;PREDICTED: pathogenesis-related homeodomain protein-like isoform X1 [Glycine max];gi|502085745|ref|XP_004487993.1;PREDICTED: pathogenesis-related homeodomain protein [Cicer arietinum];gi|955371769|ref|XP_014623468.1;PREDICTED: pathogenesis-related homeodomain protein-like isoform X2 [Glycine max];gi|593330695|ref|XP_007138774.1;hypothetical protein PHAVU_009G236200…	8	UCUGCGACGGCACAUGCAAUC&UGUUGCAUGUGUUGUUGGUUU	GO:0005634(nucleus);GO:0003676(nucleic acid binding);GO:0097159(organic cyclic compound binding);GO:0043169(cation binding);GO:0005623(cell);GO:0043231(intracellular membrane-bounded organelle);GO:0044464(cell part);GO:0043226(organelle);GO:0003677(DNA binding);GO:0005622(intracellular);GO:0043227(membrane-bounded organelle);GO:0043167(ion binding);GO:0046914(transition metal ion binding);GO:0005…	ko03018(RNA degradation)
ahy-MIR3513-p3_1ss5AG	XM_016111026.2	gi|920714171|gb|KOM54259.1;hypothetical protein LR48_Vigan10g015100 [Vigna angularis]	14.5	AGACGAGCGAUUGAAGCAUGCAGCG&UGUUGCAUGU----GUUGUUGGUUU	GO:0097159(organic cyclic compound binding);GO:0030554(adenyl nucleotide binding);GO:0043167(ion binding);GO:0032553(ribonucleotide binding);GO:0005524(ATP binding);GO:1901363(heterocyclic compound binding);GO:1901265(nucleoside phosphate binding);GO:0097367(carbohydrate derivative binding);GO:0036094(small molecule binding);GO:0043168(anion binding);GO:0032559(adenyl ribonucleotide binding);GO:0…	NA
ahy-MIR3513-p3_1ss5AG	XM_016111046.2	gi|255562456|ref|XP_002522234.1;PREDICTED: 60S ribosomal protein L11 [Ricinus communis]	9.5	GAGGCGACAAGGCGAUGCAGCU&UGUUGCAU-GUGUUGUUGGUUU	GO:0016043(cellular component organization);GO:0006996(organelle organization);GO:0042255(ribosome assembly);GO:0010467(gene expression);GO:0044267(cellular protein metabolic process);GO:0065003(macromolecular complex assembly);GO:0044444(cytoplasmic part);GO:0044260(cellular macromolecule metabolic process);GO:0043226(organelle);GO:0005737(cytoplasm);GO:0015934(large ribosomal subunit);GO:000562…	ko03010(Ribosome)
ahy-MIR3513-p3_1ss5AG	XM_016111895.2	gi|828332252|ref|XP_012574734.1;PREDICTED: uncharacterized protein LOC101494240 [Cicer arietinum]	9	GGACCAACCACUAAAUGCAGCA&UGUUGCAU-GUGUUGUUGGUUU	NA	NA
ahy-MIR3513-p3_1ss5AG	XM_016112136.2	gi|358249016|ref|NP_001239723.1;uncharacterized protein LOC100812818 [Glycine max]	7	GAGUCAGCAGCAUUUGCAGCA&UGUUGCAUGUGUUGUUGGUUU	GO:0015833(peptide transport);GO:0042886(amide transport);GO:0006810(transport);GO:0051234(establishment of localization);GO:0071702(organic substance transport);GO:0015031(protein transport);GO:0033036(macromolecule localization);GO:0045184(establishment of protein localization);GO:0051179(localization);GO:0071705(nitrogen compound transport);GO:0008104(protein localization)	ko04144(Endocytosis)
ahy-MIR3513-p3_1ss5AG	XM_016112307.2	gi|358249016|ref|NP_001239723.1;uncharacterized protein LOC100812818 [Glycine max]	6.5	GAAUCAGCAGCAUUUGCAGCA&UGUUGCAUGUGUUGUUGGUUU	NA	ko04144(Endocytosis)
ahy-MIR3513-p3_1ss5AG	XM_016112587.2	gi|356505102|ref|XP_003521331.1;PREDICTED: 26S proteasome regulatory subunit 4 homolog A [Glycine max]	17	CAACCGGCAGGGCAUGCCGGGGGACA&UGUU-----GCAUGUGUUGUUGGUUU	GO:0097159(organic cyclic compound binding);GO:0044238(primary metabolic process);GO:0005737(cytoplasm);GO:0097367(carbohydrate derivative binding);GO:0044424(intracellular part);GO:0009057(macromolecule catabolic process);GO:0030554(adenyl nucleotide binding);GO:0009056(catabolic process);GO:0005488(binding);GO:1901575(organic substance catabolic process);GO:1905368(peptidase complex);GO:0000502…	ko03050(Proteasome)
ahy-MIR3513-p3_1ss5AG	XM_016112780.2	gi|571464812|ref|XP_006583175.1;PREDICTED: uncharacterized protein LOC100812963 isoform X1 [Glycine max]	13	AGGCCGAACAACUUACCACAUGCGACA&UGUUGCAUGU-----GUUGUU-GGUUU	NA	NA
ahy-MIR3513-p3_1ss5AG	XM_016113250.2	gi|502152279|ref|XP_004508851.1;PREDICTED: uncharacterized protein LOC101489558 [Cicer arietinum]	6	AAACCAACAACACACUCAUCA&UGUUGCAUGUGUUGUUGGUUU	NA	NA
ahy-MIR3513-p3_1ss5AG	XM_016113460.2	gi|955314344|ref|XP_014629799.1;PREDICTED: peroxidase 3-like [Glycine max]	9	AAUCCAACAACACGUUGCUGCA&UGUUGCA-UGUGUUGUUGGUUU	GO:0072593(reactive oxygen species metabolic process);GO:0042221(response to chemical);GO:0008152(metabolic process);GO:0042743(hydrogen peroxide metabolic process);GO:0005488(binding);GO:0020037(heme binding);GO:0009056(catabolic process);GO:0004601(peroxidase activity);GO:0009636(response to toxic substance);GO:0003824(catalytic activity);GO:0005576(extracellular region);GO:0006979(response to …	ko00940(Phenylpropanoid biosynthesis);ko01110(Biosynthesis of secondary metabolites);ko01100(Metabolic pathways)
ahy-MIR3513-p3_1ss5AG	XM_016113461.2	gi|955314344|ref|XP_014629799.1;PREDICTED: peroxidase 3-like [Glycine max]	9	AAUCCAACAACACGUUGCUGCA&UGUUGCA-UGUGUUGUUGGUUU	GO:0044248(cellular catabolic process);GO:0020037(heme binding);GO:0006950(response to stress);GO:0044237(cellular metabolic process);GO:0098754(detoxification);GO:0009636(response to toxic substance);GO:0042744(hydrogen peroxide catabolic process);GO:0055114(oxidation-reduction process);GO:0016684(oxidoreductase activity, acting on peroxide as acceptor);GO:0043167(ion binding);GO:0016209(antioxi…	ko00940(Phenylpropanoid biosynthesis);ko01100(Metabolic pathways);ko01110(Biosynthesis of secondary metabolites)
ahy-MIR3513-p3_1ss5AG	XM_016113678.2	gi|470137151|ref|XP_004304334.1;PREDICTED: transcription initiation factor IIB [Fragaria vesca subsp. vesca]	12.5	AGCCCAACGGCGCCAGCGGCG&UGUUGCAUGUGUUGUUGGUUU	GO:0070897(DNA-templated transcriptional preinitiation complex assembly);GO:0034654(nucleobase-containing compound biosynthetic process);GO:0019438(aromatic compound biosynthetic process);GO:0046914(transition metal ion binding);GO:0016070(RNA metabolic process);GO:0005488(binding);GO:0043226(organelle);GO:0016043(cellular component organization);GO:1901360(organic cyclic compound metabolic proce…	ko03022(Basal transcription factors)
ahy-MIR3513-p3_1ss5AG	XM_016113756.2	gi|951045634|ref|XP_014518972.1;PREDICTED: uncharacterized protein LOC106776139 [Vigna radiata var. radiata]	10	CGGCCAGCGGCGCACGGAACC&UGUUGCAUGUGUUGUUGGUUU	NA	ko00531(Glycosaminoglycan degradation);ko01100(Metabolic pathways)
ahy-MIR3513-p3_1ss5AG	XM_016114053.2	gi|920691783|gb|KOM35008.1;hypothetical protein LR48_Vigan02g115800 [Vigna angularis]	9	GCAACAACAACACCUGCGGCC&UGUUGCAUGUGUUGUUGGUUU	GO:0070001(aspartic-type peptidase activity);GO:0006807(nitrogen compound metabolic process);GO:0006508(proteolysis);GO:0004175(endopeptidase activity);GO:0019538(protein metabolic process);GO:0003824(catalytic activity);GO:0043170(macromolecule metabolic process);GO:0008233(peptidase activity);GO:0071704(organic substance metabolic process);GO:0016787(hydrolase activity);GO:0044238(primary metab…	ko03010(Ribosome)
ahy-MIR3513-p3_1ss5AG	XM_016114101.2	gi|920677932|gb|KOM25100.1;hypothetical protein LR48_Vigan50s002000 [Vigna angularis];gi|571557630|ref|XP_006604440.1;PREDICTED: F-box protein At4g02760-like [Glycine max]	10.5	UGACCGGCAGCAUACGUGCUACA&UGUUGCAUGU--GUUGUUGGUUU	NA	NA
ahy-MIR3513-p3_1ss5AG	XM_016114319.2	gi|115187353|gb|ABI84248.1;syringolide-induced protein 14-1-1 [Arachis hypogaea]	13	CUACCGAUUGGUCACAUGCGGCG&UGUUGCAUGUG--UUGUUGGUUU	NA	NA
ahy-MIR3513-p3_1ss5AG	XM_016114346.2	gi|645228998|ref|XP_008221256.1;PREDICTED: tubulin beta chain-like [Prunus mume]	12.5	GUACCAGCAAUACCAGGAUGCAACU&UGUUGCAU----GUGUUGUUGGUUU	GO:0099513(polymeric cytoskeletal fiber);GO:0043229(intracellular organelle);GO:0019001(guanyl nucleotide binding);GO:0032550(purine ribonucleoside binding);GO:0001883(purine nucleoside binding);GO:0099080(supramolecular complex);GO:0005737(cytoplasm);GO:0044464(cell part);GO:0043232(intracellular non-membrane-bounded organelle);GO:0007017(microtubule-based process);GO:0005623(cell);GO:0005856(cy…	ko04145(Phagosome)
ahy-MIR3513-p3_1ss5AG	XM_016114704.2	gi|985454074|ref|XP_015386988.1;PREDICTED: uncharacterized protein LOC107177563 [Citrus sinensis]	8.5	GGGCGAACAGCGCAUGGAGCG&UGUUGCAUGUGUUGUUGGUUU	NA	NA
ahy-MIR3513-p3_1ss5AG	XM_016114941.2	gi|965671217|dbj|BAT85824.1;hypothetical protein VIGAN_04341700 [Vigna angularis var. angularis]	7	AGGCCAACU-CACAAGCAACC&UGUUGCAUGUGUUGUUGGUUU	GO:0006163(purine nucleotide metabolic process);GO:0046496(nicotinamide nucleotide metabolic process);GO:0008152(metabolic process);GO:0009123(nucleoside monophosphate metabolic process);GO:0016830(carbon-carbon lyase activity);GO:0006807(nitrogen compound metabolic process);GO:0016310(phosphorylation);GO:0019752(carboxylic acid metabolic process);GO:0072524(pyridine-containing compound metabolic…	ko00010(Glycolysis / Gluconeogenesis);ko00030(Pentose phosphate pathway);ko01230(Biosynthesis of amino acids);ko01110(Biosynthesis of secondary metabolites);ko01200(Carbon metabolism);ko01100(Metabolic pathways);ko00051(Fructose and mannose metabolism);ko00710(Carbon fixation in photosynthetic organisms)
ahy-MIR3513-p3_1ss5AG	XM_016115307.2	gi|593329192|ref|XP_007138023.1;hypothetical protein PHAVU_009G174700g [Phaseolus vulgaris]	8	GAAGCAGCAGCAGCA-GCAGCA&UGUUGCAUG-UGUUGUUGGUUU	GO:0008152(metabolic process);GO:0005840(ribosome);GO:0005623(cell);GO:0009987(cellular process);GO:1901566(organonitrogen compound biosynthetic process);GO:1990904(ribonucleoprotein complex);GO:0044464(cell part);GO:0044446(intracellular organelle part);GO:0044271(cellular nitrogen compound biosynthetic process);GO:0043226(organelle);GO:1901564(organonitrogen compound metabolic process);GO:00329…	ko03010(Ribosome)
ahy-MIR3513-p3_1ss5AG	XM_016115479.2	gi|922395217|ref|XP_003588571.2;2-on-2 hemoglobin [Medicago truncatula];gi|502124477|ref|XP_004498545.1;PREDICTED: two-on-two hemoglobin-3 [Cicer arietinum]	23.5	AAACCAGCAAGUGCCAUGCAAGCAUGCAGCA&UGUUGCAUGU-------GU---UGUUGGUUU	GO:0005488(binding);GO:0097159(organic cyclic compound binding);GO:0020037(heme binding);GO:1901363(heterocyclic compound binding);GO:0019825(oxygen binding);GO:0046906(tetrapyrrole binding)	NA
ahy-MIR3513-p3_1ss5AG	XM_016116120.2	gi|734396233|gb|KHN29552.1;Putative WRKY transcription factor 33 [Glycine soja]	12	GUGCCUGCAGCACGCGGCAGCG&UGUUGC-AUGUGUUGUUGGUUU	GO:1903506(regulation of nucleic acid-templated transcription);GO:0065007(biological regulation);GO:0010556(regulation of macromolecule biosynthetic process);GO:0005488(binding);GO:0097159(organic cyclic compound binding);GO:0019222(regulation of metabolic process);GO:0003676(nucleic acid binding);GO:0050789(regulation of biological process);GO:0003677(DNA binding);GO:0051171(regulation of nitrog…	ko04016(MAPK signaling pathway - plant);ko04626(Plant-pathogen interaction)
ahy-MIR3513-p3_1ss5AG	XM_016116254.2	gi|502124374|ref|XP_004498500.1;PREDICTED: exonuclease mut-7 homolog [Cicer arietinum]	6	GAGCAGAUAACAUAUGCAGCU&UGUUGCAUGUGUUGUUGGUUU	GO:0097159(organic cyclic compound binding);GO:0009987(cellular process);GO:0005488(binding);GO:0044238(primary metabolic process);GO:0003824(catalytic activity);GO:0071704(organic substance metabolic process);GO:0006725(cellular aromatic compound metabolic process);GO:1901363(heterocyclic compound binding);GO:0004518(nuclease activity);GO:0006807(nitrogen compound metabolic process);GO:0090305(n…	NA
ahy-MIR3513-p3_1ss5AG	XM_016116654.2	gi|920679764|gb|KOM26653.1;hypothetical protein LR48_Vigan303s007500 [Vigna angularis];gi|965615239|dbj|BAU00872.1;hypothetical protein VIGAN_10250800 [Vigna angularis var. angularis]	6.5	GAGCUUGAACAAUACAUGCAAUC&UGUUGCAUGUGUUGUU--GGUUU	NA	ko04141(Protein processing in endoplasmic reticulum)
ahy-MIR3513-p3_1ss5AG	XM_016116655.2	gi|920679764|gb|KOM26653.1;hypothetical protein LR48_Vigan303s007500 [Vigna angularis];gi|965615239|dbj|BAU00872.1;hypothetical protein VIGAN_10250800 [Vigna angularis var. angularis]	6.5	GAGCUUGAACAAUACAUGCAAUC&UGUUGCAUGUGUUGUU--GGUUU	NA	ko04141(Protein processing in endoplasmic reticulum)
ahy-MIR3513-p3_1ss5AG	XM_016116656.2	gi|920679764|gb|KOM26653.1;hypothetical protein LR48_Vigan303s007500 [Vigna angularis];gi|965615239|dbj|BAU00872.1;hypothetical protein VIGAN_10250800 [Vigna angularis var. angularis]	6.5	GAGCUUGAACAAUACAUGCAAUC&UGUUGCAUGUGUUGUU--GGUUU	NA	ko04141(Protein processing in endoplasmic reticulum)
ahy-MIR3513-p3_1ss5AG	XM_016117330.2	gi|747044526|ref|XP_011089536.1;PREDICTED: heat shock cognate protein 80 [Sesamum indicum]	4	AGACUAACAACACAU-UAACA&UGUUGCAUGUGUUGUUGGUUU	GO:1901363(heterocyclic compound binding);GO:1901265(nucleoside phosphate binding);GO:0005488(binding);GO:0097159(organic cyclic compound binding);GO:0006457(protein folding);GO:0050896(response to stimulus);GO:0000166(nucleotide binding);GO:0043168(anion binding);GO:0006950(response to stress);GO:0005515(protein binding);GO:0035639(purine ribonucleoside triphosphate binding);GO:0009987(cellular …	ko04141(Protein processing in endoplasmic reticulum);ko04626(Plant-pathogen interaction)
ahy-MIR3513-p3_1ss5AG	XM_016117396.2	gi|84468390|dbj|BAE71278.1;putative fasciclin-like arabinogalactan protein FLA2 [Trifolium pratense]	9	AAAUCAGCAGCGCAUUGAGCU&UGUUGCAUGUGUUGUUGGUUU	NA	NA
ahy-MIR3513-p3_1ss5AG	XM_016117981.2	gi|828296286|ref|XP_012568616.1;PREDICTED: UBP1-associated protein 2B-like [Cicer arietinum]	10	GAACCAGCCGGGGAUGCAGCC&UGUUGCAUGUGUUGUUGGUUU	GO:0005488(binding);GO:0097159(organic cyclic compound binding);GO:1901363(heterocyclic compound binding)	ko03040(Spliceosome)
ahy-MIR3513-p3_1ss5AG	XM_016117982.2	gi|828296286|ref|XP_012568616.1;PREDICTED: UBP1-associated protein 2B-like [Cicer arietinum]	10	GAACCAGCCGGGGAUGCAGCC&UGUUGCAUGUGUUGUUGGUUU	GO:0005488(binding);GO:0097159(organic cyclic compound binding);GO:1901363(heterocyclic compound binding)	ko03040(Spliceosome)
ahy-MIR3513-p3_1ss5AG	XM_016118259.2	gi|734416678|gb|KHN38557.1;Putative 38.1 kDa protein [Glycine soja]	11.5	AGAUCAGCAGCGCGUGCUCGG&UGUUGCAUGUGUUGUUGGUUU	GO:0006139(nucleobase-containing compound metabolic process);GO:0046483(heterocycle metabolic process);GO:0044238(primary metabolic process);GO:0005488(binding);GO:0043170(macromolecule metabolic process);GO:0006807(nitrogen compound metabolic process);GO:0034641(cellular nitrogen compound metabolic process);GO:1901360(organic cyclic compound metabolic process);GO:0003676(nucleic acid binding);GO…	NA
ahy-MIR3513-p3_1ss5AG	XM_016118330.2	gi|950984188|ref|XP_014502987.1;PREDICTED: U-box domain-containing protein 12-like [Vigna radiata var. radiata]	8	UGGCCAACAACAUGAUGCAAAA&UGUUGCAU-GUGUUGUUGGUUU	GO:0071704(organic substance metabolic process);GO:0009608(response to symbiont);GO:0044419(interspecies interaction between organisms);GO:0009609(response to symbiotic bacterium);GO:0006464(cellular protein modification process);GO:0019538(protein metabolic process);GO:0085030(mutualism);GO:0005488(binding);GO:0044267(cellular protein metabolic process);GO:0016020(membrane);GO:0044464(cell part)…	NA
ahy-MIR3513-p3_1ss5AG	XM_021124532.1	gi|363806976|ref|NP_001242314.1;uncharacterized protein LOC100820588 [Glycine max]	5.5	AAGCACAACAUCACAUGUGACA&UGUUGCAUGUGUUGUUG-GUUU	GO:0046914(transition metal ion binding);GO:0043167(ion binding);GO:0043169(cation binding);GO:0005488(binding);GO:0046872(metal ion binding);GO:0003824(catalytic activity);GO:0008152(metabolic process);GO:0008270(zinc ion binding);GO:0055114(oxidation-reduction process);GO:0016491(oxidoreductase activity)	ko01100(Metabolic pathways);ko01110(Biosynthesis of secondary metabolites);ko00940(Phenylpropanoid biosynthesis)
ahy-MIR3513-p3_1ss5AG	XM_021124533.1	gi|363806976|ref|NP_001242314.1;uncharacterized protein LOC100820588 [Glycine max]	5.5	AAGCACAACAUCACAUGUGACA&UGUUGCAUGUGUUGUUG-GUUU	GO:0046914(transition metal ion binding);GO:0043167(ion binding);GO:0043169(cation binding);GO:0005488(binding);GO:0046872(metal ion binding);GO:0003824(catalytic activity);GO:0008152(metabolic process);GO:0008270(zinc ion binding);GO:0055114(oxidation-reduction process);GO:0016491(oxidoreductase activity)	ko01100(Metabolic pathways);ko01110(Biosynthesis of secondary metabolites);ko00940(Phenylpropanoid biosynthesis)
ahy-MIR3513-p3_1ss5AG	XM_021125444.1	gi|593796114|ref|XP_007161095.1;hypothetical protein PHAVU_001G042200g [Phaseolus vulgaris]	8	GACCCAACAAUACUUGUAGCA&UGUUGCAUGUGUUGUUGGUUU	GO:0006351(transcription, DNA-templated);GO:0071704(organic substance metabolic process);GO:0009058(biosynthetic process);GO:0043226(organelle);GO:0034654(nucleobase-containing compound biosynthetic process);GO:0032774(RNA biosynthetic process);GO:0003700(DNA binding transcription factor activity);GO:0043229(intracellular organelle);GO:0006725(cellular aromatic compound metabolic process);GO:0009…	ko04626(Plant-pathogen interaction);ko04016(MAPK signaling pathway - plant)
ahy-MIR3513-p3_1ss5AG	XM_021125788.1	gi|950953226|ref|XP_014496124.1;PREDICTED: serine/threonine-protein kinase Nek6-like isoform X2 [Vigna radiata var. radiata]	6	AAGCCGACU-UGCAUGCAACA&UGUUGCAUGUGUUGUUGGUUU	GO:0035639(purine ribonucleoside triphosphate binding);GO:1901564(organonitrogen compound metabolic process);GO:0043167(ion binding);GO:0036094(small molecule binding);GO:0016301(kinase activity);GO:0006793(phosphorus metabolic process);GO:0005524(ATP binding);GO:0044237(cellular metabolic process);GO:1901363(heterocyclic compound binding);GO:0000166(nucleotide binding);GO:0006464(cellular protei…	NA
ahy-MIR3513-p3_1ss5AG	XM_021126414.1	gi|920696259|gb|KOM39484.1;hypothetical protein LR48_Vigan03g286600 [Vigna angularis];gi|357446669|ref|XP_003593610.1;dephospho-CoA kinase [Medicago truncatula];gi|502112521|ref|XP_004494358.1;PREDICTED: dephospho-CoA kinase [Cicer arietinum]	10	UCGCCGGCGGCAGAAGCAACU&UGUUGCAUGUGUUGUUGGUUU	GO:1901363(heterocyclic compound binding);GO:0043169(cation binding);GO:0016740(transferase activity);GO:0034654(nucleobase-containing compound biosynthetic process);GO:0009108(coenzyme biosynthetic process);GO:0034641(cellular nitrogen compound metabolic process);GO:0019438(aromatic compound biosynthetic process);GO:0032553(ribonucleotide binding);GO:0009987(cellular process);GO:0008152(metaboli…	ko01100(Metabolic pathways);ko00770(Pantothenate and CoA biosynthesis)
ahy-MIR3513-p3_1ss5AG	XM_021126556.1	gi|596176681|ref|XP_007223232.1;hypothetical protein PRUPE_ppa003791mg [Prunus persica]	8	ACAGCAACAAUACAUGGCAGCU&UGUUGC-AUGUGUUGUUGGUUU	GO:0006873(cellular ion homeostasis);GO:0098771(inorganic ion homeostasis);GO:0055080(cation homeostasis);GO:0005488(binding);GO:0043169(cation binding);GO:0055076(transition metal ion homeostasis);GO:0042592(homeostatic process);GO:0046914(transition metal ion binding);GO:0050801(ion homeostasis);GO:0051179(localization);GO:0046916(cellular transition metal ion homeostasis);GO:0009987(cellular p…	NA
ahy-MIR3513-p3_1ss5AG	XM_021126825.1	gi|922385546|ref|XP_003592893.2;zinc finger CCCH domain protein, putative [Medicago truncatula];gi|571471724|ref|XP_006585389.1;PREDICTED: zinc finger CCCH domain-containing protein 5-like isoform X2 [Glycine max];gi|566168313|ref|XP_006385082.1;hypothetical protein POPTR_0004s23730g [Populus trichocarpa];gi|140053486|gb|ABO80461.1;Concanavalin A-like lectin/glucanase; U2 auxiliary factor small s…	9.5	UCACCGGCGGCAGAAGCAACU&UGUUGCAUGUGUUGUUGGUUU	GO:0097159(organic cyclic compound binding);GO:1901363(heterocyclic compound binding);GO:0005488(binding);GO:0003676(nucleic acid binding)	ko03040(Spliceosome)
ahy-MIR3513-p3_1ss5AG	XM_021127228.1	gi|828296286|ref|XP_012568616.1;PREDICTED: UBP1-associated protein 2B-like [Cicer arietinum]	10	GAACCAGCCGGGGAUGCAGCC&UGUUGCAUGUGUUGUUGGUUU	GO:0005488(binding);GO:0097159(organic cyclic compound binding);GO:1901363(heterocyclic compound binding)	ko03040(Spliceosome)
ahy-MIR3513-p3_1ss5AG	XM_021127558.1	gi|502096441|ref|XP_004490738.1;PREDICTED: KH domain-containing protein At3g08620-like isoform X2 [Cicer arietinum]	8	AAACCAACAACUCUUGUGGCU&UGUUGCAUGUGUUGUUGGUUU	GO:0097159(organic cyclic compound binding);GO:1901363(heterocyclic compound binding);GO:0005488(binding);GO:0003676(nucleic acid binding);GO:0003723(RNA binding)	NA
ahy-MIR3513-p3_1ss5AG	XM_021127828.1	-	17	AGACCAAUAACAUUUAGUAGUGCAAUU&UGUUGCAU------GUGUUGUUGGUUU	NA	NA
ahy-MIR3513-p3_1ss5AG	XM_021127829.1	-	17	AGACCAAUAACAUUUAGUAGUGCAAUU&UGUUGCAU------GUGUUGUUGGUUU	NA	NA
ahy-MIR3513-p3_1ss5AG	XM_021127831.1	gi|950978847|ref|XP_014501754.1;PREDICTED: protein FLX-like 1 isoform X1 [Vigna radiata var. radiata];gi|950978865|ref|XP_014501757.1;PREDICTED: protein FLX-like 1 isoform X2 [Vigna radiata var. radiata]	12	AGGCCGCGCAGCACGAGCUGCAACG&UGUUGCA---UGUGUUGU-UGGUUU	NA	ko01100(Metabolic pathways);ko01200(Carbon metabolism);ko00620(Pyruvate metabolism);ko00020(Citrate cycle (TCA cycle));ko03013(RNA transport);ko00010(Glycolysis / Gluconeogenesis);ko01110(Biosynthesis of secondary metabolites)
ahy-MIR3513-p3_1ss5AG	XM_021127832.1	gi|950978847|ref|XP_014501754.1;PREDICTED: protein FLX-like 1 isoform X1 [Vigna radiata var. radiata];gi|950978865|ref|XP_014501757.1;PREDICTED: protein FLX-like 1 isoform X2 [Vigna radiata var. radiata]	12	AGGCCGCGCAGCACGAGCUGCAACG&UGUUGCA---UGUGUUGU-UGGUUU	NA	ko01100(Metabolic pathways);ko01200(Carbon metabolism);ko00620(Pyruvate metabolism);ko00020(Citrate cycle (TCA cycle));ko03013(RNA transport);ko00010(Glycolysis / Gluconeogenesis);ko01110(Biosynthesis of secondary metabolites)
ahy-MIR3513-p3_1ss5AG	XM_021128182.1	gi|571514732|ref|XP_006597144.1;PREDICTED: uncharacterized protein LOC100779103 isoform X2 [Glycine max];gi|356550559|ref|XP_003543653.1;PREDICTED: uncharacterized protein LOC100816837 isoform X1 [Glycine max]	7.5	AAACUGGCAGCACAAGCAGGA&UGUUGCAUGUGUUGUUGGUUU	GO:0046916(cellular transition metal ion homeostasis);GO:0006812(cation transport);GO:0009987(cellular process);GO:0050801(ion homeostasis);GO:0042592(homeostatic process);GO:0065007(biological regulation);GO:0043169(cation binding);GO:0098771(inorganic ion homeostasis);GO:0044464(cell part);GO:0043167(ion binding);GO:0046872(metal ion binding);GO:0046914(transition metal ion binding);GO:0030003(…	ko03015(mRNA surveillance pathway);ko03013(RNA transport)
ahy-MIR3513-p3_1ss5AG	XM_021129179.1	gi|356550171|ref|XP_003543462.1;PREDICTED: beta-galactosidase 8-like [Glycine max]	5.5	CGAUUAUCAAUACAUGCAACG&UGUUGCAUGUGUUGUUGGUUU	GO:0005618(cell wall);GO:0005975(carbohydrate metabolic process);GO:0005488(binding);GO:0016787(hydrolase activity);GO:0044444(cytoplasmic part);GO:0008152(metabolic process);GO:0005737(cytoplasm);GO:0043226(organelle);GO:0030246(carbohydrate binding);GO:0044424(intracellular part);GO:0044238(primary metabolic process);GO:0043231(intracellular membrane-bounded organelle);GO:0015925(galactosidase …	ko00604(Glycosphingolipid biosynthesis - ganglio series);ko00531(Glycosaminoglycan degradation);ko00052(Galactose metabolism);ko01100(Metabolic pathways);ko00600(Sphingolipid metabolism);ko00511(Other glycan degradation)
ahy-MIR3513-p3_1ss5AG	XM_021129567.1	gi|965606164|dbj|BAT93340.1;hypothetical protein VIGAN_07228700 [Vigna angularis var. angularis]	10	GAGCCAUUCAUCGCGUGCGAUG&UGUUGCAUGUGUUG-UUGGUUU	GO:0009250(glucan biosynthetic process);GO:0033692(cellular polysaccharide biosynthetic process);GO:0003824(catalytic activity);GO:0045229(external encapsulating structure organization);GO:0071704(organic substance metabolic process);GO:0051273(beta-glucan metabolic process);GO:0008270(zinc ion binding);GO:0016740(transferase activity);GO:0071840(cellular component organization or biogenesis);GO:…	NA
ahy-MIR3513-p3_1ss5AG	XM_021130024.1	gi|955302495|ref|XP_003516268.2;PREDICTED: putative phospholipid-transporting ATPase 9 [Glycine max];gi|356508527|ref|XP_003523007.1;PREDICTED: putative phospholipid-transporting ATPase 9 isoform X1 [Glycine max];gi|593705903|ref|XP_007153308.1;hypothetical protein PHAVU_003G024200g [Phaseolus vulgaris]	7.5	AAACCUUGGAGCAUGUGCAGCA&UGUUGCAUGUGUUGU-UGGUUU	GO:0043231(intracellular membrane-bounded organelle);GO:0016462(pyrophosphatase activity);GO:0005802(trans-Golgi network);GO:0005737(cytoplasm);GO:0000139(Golgi membrane);GO:0005524(ATP binding);GO:0016050(vesicle organization);GO:0005886(plasma membrane);GO:0034204(lipid translocation);GO:0065007(biological regulation);GO:0006811(ion transport);GO:0006810(transport);GO:0017111(nucleoside-triphos…	NA
ahy-MIR3513-p3_1ss5AG	XM_021130106.1	gi|359806059|ref|NP_001240924.1;uncharacterized protein LOC100795779 [Glycine max]	7	AAACCAGCGACGAC-UGUGACA&UGUUGCAUGU-GUUGUUGGUUU	GO:0016020(membrane)	ko00730(Thiamine metabolism);ko01100(Metabolic pathways)
ahy-MIR3513-p3_1ss5AG	XM_021131237.1	gi|571567282|ref|XP_006606049.1;PREDICTED: protein TIME FOR COFFEE-like isoform X2 [Glycine max];gi|593660629|ref|XP_007143234.1;hypothetical protein PHAVU_007G055400g [Phaseolus vulgaris]	9	AAACCAUCCACAGCACAGGUGCAACC&UGUUGCA--UGUGUUGU---UGGUUU	NA	ko03010(Ribosome)
ahy-MIR3513-p3_1ss5AG	XM_021131602.1	gi|922355420|ref|XP_003611270.2;PPR containing plant-like protein [Medicago truncatula];gi|734408847|gb|KHN34954.1;Pentatricopeptide repeat-containing protein, chloroplastic [Glycine soja]	10	UCGCCGGCGGCAGAAGCAACU&UGUUGCAUGUGUUGUUGGUUU	NA	NA
ahy-MIR3513-p3_1ss5AG	XM_021132137.1	gi|571465848|ref|XP_006583492.1;PREDICTED: TMV resistance protein N-like [Glycine max];gi|955336332|ref|XP_006586404.2;PREDICTED: disease resistance protein LAZ5-like [Glycine max];gi|734406617|gb|KHN34011.1;TMV resistance protein N [Glycine soja]	6.5	CAACCGUAAACAUGUGCAGCA&UGUUGCAUGUGUUGUUGGUUU	NA	ko03040(Spliceosome);ko04141(Protein processing in endoplasmic reticulum);ko04144(Endocytosis)
ahy-MIR3513-p3_1ss5AG	XM_021132274.1	gi|356504428|ref|XP_003520998.1;PREDICTED: uncharacterized protein LOC100799171 [Glycine max]	9	GAACCAGCAGCGCAGGUUACG&UGUUGCAUGUGUUGUUGGUUU	NA	NA
ahy-MIR3513-p3_1ss5AG	XM_021132322.1	gi|734393568|gb|KHN28254.1;G-type lectin S-receptor-like serine/threonine-protein kinase CES101 [Glycine soja];gi|571514788|ref|XP_006597152.1;PREDICTED: G-type lectin S-receptor-like serine/threonine-protein kinase CES101 [Glycine max]	7	AAACCAACAACAAUUGCAUACU&UGU-UGCAUGUGUUGUUGGUUU	GO:0044237(cellular metabolic process);GO:0071704(organic substance metabolic process);GO:0006796(phosphate-containing compound metabolic process);GO:0004553(hydrolase activity, hydrolyzing O-glycosyl compounds);GO:0003824(catalytic activity);GO:0008152(metabolic process);GO:0009987(cellular process);GO:0016310(phosphorylation);GO:0016773(phosphotransferase activity, alcohol group as acceptor);GO…	ko00520(Amino sugar and nucleotide sugar metabolism);ko01100(Metabolic pathways)
ahy-MIR3513-p3_1ss5AG	XM_021132806.1	gi|356555113|ref|XP_003545882.1;PREDICTED: polyphenol oxidase A1, chloroplastic-like [Glycine max]	11	AGACCAGCAGCACAUUUGGUCAACG&UGUUG-C---AUGUGUUGUUGGUUU	GO:0008152(metabolic process);GO:0016679(oxidoreductase activity, acting on diphenols and related substances as donors);GO:0042440(pigment metabolic process);GO:0046872(metal ion binding);GO:0043169(cation binding);GO:0016491(oxidoreductase activity);GO:0046148(pigment biosynthetic process);GO:0055114(oxidation-reduction process);GO:0043167(ion binding);GO:0003824(catalytic activity);GO:0005488(b…	ko00350(Tyrosine metabolism);ko01110(Biosynthesis of secondary metabolites);ko00950(Isoquinoline alkaloid biosynthesis);ko01100(Metabolic pathways)
ahy-MIR3513-p3_1ss5AG	XM_021133011.1	gi|951038227|ref|XP_014517109.1;PREDICTED: plant cysteine oxidase 5-like [Vigna radiata var. radiata]	7	AGACCAGCAACACUAGCAAGA&UGUUGCAUGUGUUGUUGGUUU	GO:0043170(macromolecule metabolic process);GO:0003824(catalytic activity);GO:0036211(protein modification process);GO:0044237(cellular metabolic process);GO:0070482(response to oxygen levels);GO:0051213(dioxygenase activity);GO:0045333(cellular respiration);GO:0070483(detection of hypoxia);GO:0019538(protein metabolic process);GO:0050896(response to stimulus);GO:0009061(anaerobic respiration);GO…	ko00430(Taurine and hypotaurine metabolism);ko01100(Metabolic pathways)
ahy-MIR3513-p3_1ss5AG	XM_021133107.1	gi|502135596|ref|XP_004502387.1;PREDICTED: protein-tyrosine-phosphatase MKP1-like isoform X2 [Cicer arietinum]	8	CAGAAAACAGGACAUGCAACA&UGUUGCAUGUGUUGUUGGUUU	GO:0006793(phosphorus metabolic process);GO:0044238(primary metabolic process);GO:0019538(protein metabolic process);GO:0036211(protein modification process);GO:0016788(hydrolase activity, acting on ester bonds);GO:0043170(macromolecule metabolic process);GO:0043412(macromolecule modification);GO:0044237(cellular metabolic process);GO:0042578(phosphoric ester hydrolase activity);GO:0006464(cellul…	NA
ahy-MIR3513-p3_1ss5AG	XM_021133833.1	-	6	AAACCAAC-ACACACCCAGCA&UGUUGCAUGUGUUGUUGGUUU	NA	NA
ahy-MIR3513-p3_1ss5AG	XM_021134151.1	gi|950993885|ref|XP_014505005.1;PREDICTED: protein VACUOLELESS1 [Vigna radiata var. radiata]	14.5	AAACUAACAUUUGCACAAAAUGCAGCA&UGUUGCA---UGUGU---UGUUGGUUU	GO:0044464(cell part);GO:0046907(intracellular transport);GO:0005623(cell);GO:0050794(regulation of cellular process);GO:0051049(regulation of transport);GO:0016197(endosomal transport);GO:0050789(regulation of biological process);GO:0043234(protein complex);GO:0051128(regulation of cellular component organization);GO:0015031(protein transport);GO:0044446(intracellular organelle part);GO:0005737(…	NA
ahy-MIR3513-p3_1ss5AG	XM_021134308.1	gi|571449345|ref|XP_006578110.1;PREDICTED: uncharacterized protein LOC100813264 [Glycine max]	7	AGGCCGAGGGCAAAUGCAACG&UGUUGCAUGUGUUGUUGGUUU	NA	NA
ahy-MIR3513-p3_1ss5AG	XM_021136277.1	gi|645244228|ref|XP_008228334.1;PREDICTED: E3 ubiquitin-protein ligase RNF144B [Prunus mume];gi|951055753|ref|XP_014521574.1;PREDICTED: probable E3 ubiquitin-protein ligase ARI10 [Vigna radiata var. radiata]	10	UUGCCGGCGGCAGAAGCAGCA&UGUUGCAUGUGUUGUUGGUUU	GO:0030162(regulation of proteolysis);GO:0005515(protein binding);GO:0051171(regulation of nitrogen compound metabolic process);GO:0042787(protein ubiquitination involved in ubiquitin-dependent protein catabolic process);GO:0051173(positive regulation of nitrogen compound metabolic process);GO:1902494(catalytic complex);GO:0050794(regulation of cellular process);GO:0009987(cellular process);GO:00…	NA
ahy-MIR3513-p3_1ss5AG	XM_021136282.1	gi|571530486|ref|XP_006599745.1;PREDICTED: acid phosphatase 1-like [Glycine max]	8	AUGCU-ACAAUCACGUGCAGCA&UGUUGCAUGUG-UUGUUGGUUU	NA	ko03010(Ribosome);ko04016(MAPK signaling pathway - plant)
ahy-MIR3513-p3_1ss5AG	XM_021137737.1	gi|356567418|ref|XP_003551917.1;PREDICTED: mitogen-activated protein kinase 20 isoform X1 [Glycine max]	6.5	CAGGCAACAACACAUGGUCAACA&UGUUG--CAUGUGUUGUUGGUUU	GO:0006796(phosphate-containing compound metabolic process);GO:0005057(signal transducer activity, downstream of receptor);GO:0051716(cellular response to stimulus);GO:0050789(regulation of biological process);GO:0035639(purine ribonucleoside triphosphate binding);GO:0050794(regulation of cellular process);GO:0004672(protein kinase activity);GO:0003824(catalytic activity);GO:0004871(signal transd…	ko04016(MAPK signaling pathway - plant)
ahy-MIR3513-p3_1ss5AG	XM_021138401.1	gi|970011546|ref|XP_015066690.1;PREDICTED: CBL-interacting serine/threonine-protein kinase 23 [Solanum pennellii];gi|356530563|ref|XP_003533850.1;PREDICTED: CBL-interacting serine/threonine-protein kinase 23 [Glycine max];gi|950976563|ref|XP_014501312.1;PREDICTED: CBL-interacting serine/threonine-protein kinase 23-like [Vigna radiata var. radiata];gi|694363261|ref|XP_009360934.1;PREDICTED: CBL-in…	22.5	CGACCAACAGCGGAAGGACACGUGUCGGCA&UGUUG-CAUGUGU--------UGUUGGUUU	GO:0016773(phosphotransferase activity, alcohol group as acceptor);GO:0043229(intracellular organelle);GO:0023052(signaling);GO:0055085(transmembrane transport);GO:0005829(cytosol);GO:0006950(response to stress);GO:0006793(phosphorus metabolic process);GO:0009991(response to extracellular stimulus);GO:0010118(stomatal movement);GO:0006813(potassium ion transport);GO:0031667(response to nutrient l…	NA
ahy-MIR3513-p3_1ss5AG	XM_021138667.1	gi|947111581|gb|KRH59907.1;hypothetical protein GLYMA_05G208200 [Glycine max];gi|351724457|ref|NP_001237826.1;uncharacterized protein LOC100305606 [Glycine max];gi|955318769|ref|XP_014630774.1;PREDICTED: uncharacterized protein LOC100305606 isoform X3 [Glycine max];gi|965609214|dbj|BAT95705.1;hypothetical protein VIGAN_08247700 [Vigna angularis var. angularis]	7.5	CCACCAUCGACCACAUGCAAUG&UGUUGCAUGUG-UUGUUGGUUU	GO:0016020(membrane)	ko00564(Glycerophospholipid metabolism);ko01110(Biosynthesis of secondary metabolites);ko01100(Metabolic pathways);ko04070(Phosphatidylinositol signaling system)
ahy-MIR3513-p3_1ss5AG	XM_021138762.1	gi|947115590|gb|KRH63892.1;hypothetical protein GLYMA_04G202600 [Glycine max];gi|593328794|ref|XP_007137824.1;hypothetical protein PHAVU_009G158800g [Phaseolus vulgaris]	9.5	UCCCCAGCAACAAGAGCAACA&UGUUGCAUGUGUUGUUGGUUU	NA	NA
ahy-MIR3513-p3_1ss5AG	XM_021139320.1	gi|734436409|gb|KHN48113.1;Subtilisin-like protease [Glycine soja]	8.5	CAACCAGCAACAGCACUGCUGCA&UGUUGCA-UG-UGUUGUUGGUUU	GO:0004252(serine-type endopeptidase activity);GO:0006508(proteolysis);GO:0016020(membrane);GO:0004175(endopeptidase activity);GO:0071944(cell periphery);GO:0005623(cell);GO:0043170(macromolecule metabolic process);GO:0016787(hydrolase activity);GO:0019538(protein metabolic process);GO:0044238(primary metabolic process);GO:0030312(external encapsulating structure);GO:0017171(serine hydrolase acti…	ko04146(Peroxisome)
ahy-MIR3513-p3_1ss5AG	XM_021139393.1	gi|920687307|gb|KOM31290.1;hypothetical protein LR48_Vigan01g084500 [Vigna angularis]	13.5	GGGCUAAUAGCCGGAGCAUGCAGCA&UGUUGCAUGU----GUUGUUGGUUU	GO:0016021(integral component of membrane);GO:0031224(intrinsic component of membrane);GO:0016020(membrane);GO:0044425(membrane part)	ko00940(Phenylpropanoid biosynthesis);ko01100(Metabolic pathways);ko01110(Biosynthesis of secondary metabolites)
ahy-MIR3513-p3_1ss5AG	XM_021139601.1	gi|734416918|gb|KHN38635.1;hypothetical protein glysoja_008184 [Glycine soja]	4.5	CAGCCAGUAAUACAUGUAACA&UGUUGCAUGUGUUGUUGGUUU	NA	NA
ahy-MIR3513-p3_1ss5AG	XM_021139784.1	gi|823253409|ref|XP_012459327.1;PREDICTED: V-type proton ATPase subunit D [Gossypium raimondii]	14.5	UGGCCCGGGGUGGACAGCAGGUGCAGCA&UGUUGCAUGUGUUGUU-------GGUUU	GO:0043492(ATPase activity, coupled to movement of substances);GO:0043229(intracellular organelle);GO:0051234(establishment of localization);GO:0017111(nucleoside-triphosphatase activity);GO:0042623(ATPase activity, coupled);GO:0043231(intracellular membrane-bounded organelle);GO:0044422(organelle part);GO:0098805(whole membrane);GO:0044437(vacuolar part);GO:0044464(cell part);GO:0005773(vacuole)…	ko04145(Phagosome);ko01100(Metabolic pathways);ko00190(Oxidative phosphorylation)
ahy-MIR3513-p3_1ss5AG	XM_021140232.1	gi|950974914|ref|XP_014501007.1;PREDICTED: eukaryotic initiation factor 4A-3 [Vigna radiata var. radiata]	9	GUCUCAGCAAUGCAUGGCGACA&UGUUGC-AUGUGUUGUUGGUUU	GO:0032555(purine ribonucleotide binding);GO:0005488(binding);GO:0032559(adenyl ribonucleotide binding);GO:0097159(organic cyclic compound binding);GO:0036094(small molecule binding);GO:0016817(hydrolase activity, acting on acid anhydrides);GO:0004386(helicase activity);GO:0030554(adenyl nucleotide binding);GO:0016818(hydrolase activity, acting on acid anhydrides, in phosphorus-containing anhydri…	ko03015(mRNA surveillance pathway);ko03040(Spliceosome);ko03013(RNA transport)
ahy-MIR3513-p3_1ss5AG	XM_021140584.1	gi|951036604|ref|XP_014516665.1;PREDICTED: ubiquitin receptor RAD23b-like [Vigna radiata var. radiata]	11	CUGCCAGCAAUCCACCUGCAGCU&UGUUGCAUGUG--UUGUUGGUUU	GO:0019538(protein metabolic process);GO:0071704(organic substance metabolic process);GO:0043229(intracellular organelle);GO:0003684(damaged DNA binding);GO:0044260(cellular macromolecule metabolic process);GO:1901564(organonitrogen compound metabolic process);GO:0044424(intracellular part);GO:0043231(intracellular membrane-bounded organelle);GO:0043170(macromolecule metabolic process);GO:0006289…	ko04141(Protein processing in endoplasmic reticulum);ko03420(Nucleotide excision repair)
ahy-MIR3513-p3_1ss5AG	XM_021140611.1	-	9	CCGCCAGCAGCACCUGU-ACA&UGUUGCAUGUGUUGUUGGUUU	NA	NA
ahy-MIR3513-p3_1ss5AG	XM_021141910.1	gi|356496275|ref|XP_003516994.1;PREDICTED: binding partner of ACD11 1-like [Glycine max]	9	AGACCAAAUCGGCAUUUGCAGCU&UGUUGCAUGUGUUG--UUGGUUU	GO:1901265(nucleoside phosphate binding);GO:0036094(small molecule binding);GO:1901363(heterocyclic compound binding);GO:0003676(nucleic acid binding);GO:0097159(organic cyclic compound binding);GO:0000166(nucleotide binding);GO:0005488(binding)	NA
ahy-MIR3513-p3_1ss5AG	XM_021142134.1	gi|828331144|ref|XP_012574554.1;PREDICTED: STS14 protein [Cicer arietinum]	11.5	ACAGCAGCAACACGUGCGUGU&UGUUGCAUGUGUUGUUGGUUU	NA	ko04016(MAPK signaling pathway - plant);ko04626(Plant-pathogen interaction);ko04075(Plant hormone signal transduction)
ahy-MIR3513-p3_1ss5AG	XM_021143289.1	gi|356560055|ref|XP_003548311.1;PREDICTED: protein argonaute 1-like [Glycine max]	11.5	GGGCCAACAGCGCCCUGCAGAA&UGUUGCA-UGUGUUGUUGGUUU	GO:0003676(nucleic acid binding);GO:0005488(binding);GO:0097159(organic cyclic compound binding);GO:1901363(heterocyclic compound binding)	NA
ahy-MIR3513-p3_1ss5AG	XM_021143975.1	gi|593783487|ref|XP_007154784.1;hypothetical protein PHAVU_003G147700g [Phaseolus vulgaris];gi|357479735|ref|XP_003610153.1;xyloglucan endotransglucosylase/hydrolase family protein [Medicago truncatula];gi|728808275|gb|KHF98175.1;putative xyloglucan endotransglucosylase/hydrolase 23 -like protein [Gossypium arboreum];gi|388518287|gb|AFK47205.1;unknown [Lotus japonicus]	7.5	AUGCCAACAAUGCAUGCAUCU&UGUUGCAUGUGUUGUUGGUUU	GO:0071555(cell wall organization);GO:0016762(xyloglucan:xyloglucosyl transferase activity);GO:0009987(cellular process);GO:0016757(transferase activity, transferring glycosyl groups);GO:0016787(hydrolase activity);GO:0044238(primary metabolic process);GO:0005576(extracellular region);GO:0016043(cellular component organization);GO:0010411(xyloglucan metabolic process);GO:0016758(transferase activ…	ko04075(Plant hormone signal transduction)
ahy-MIR3513-p3_1ss5AG	BGI_novel_T000037	gi|571482330|ref|XP_006588921.1;PREDICTED: DNA-directed RNA polymerase I subunit 1-like [Glycine max]	8	GAACCAGCAACACAAAUGACC&UGUUGCAUGUGUUGUUGGUUU	GO:0009059(macromolecule biosynthetic process);GO:0031981(nuclear lumen);GO:0006351(transcription, DNA-templated);GO:0046483(heterocycle metabolic process);GO:0043232(intracellular non-membrane-bounded organelle);GO:0046914(transition metal ion binding);GO:0044260(cellular macromolecule metabolic process);GO:0043231(intracellular membrane-bounded organelle);GO:0005622(intracellular);GO:0043227(me…	ko00230(Purine metabolism);ko00240(Pyrimidine metabolism);ko03020(RNA polymerase);ko01100(Metabolic pathways)
ahy-MIR3513-p3_1ss5AG	BGI_novel_T000073	gi|571474043|ref|XP_006586107.1;PREDICTED: cell division protein FtsZ homolog 1, chloroplastic-like [Glycine max]	6.5	GAACCCCAAACGCAUGCGACG&UGUUGCAUGUGUUGUUGGUUU	GO:0005623(cell);GO:0035639(purine ribonucleoside triphosphate binding);GO:0005856(cytoskeleton);GO:1901265(nucleoside phosphate binding);GO:0016043(cellular component organization);GO:0032561(guanyl ribonucleotide binding);GO:0005737(cytoplasm);GO:0032550(purine ribonucleoside binding);GO:0017076(purine nucleotide binding);GO:0043226(organelle);GO:0036094(small molecule binding);GO:0003924(GTPas…	NA
ahy-MIR3513-p3_1ss5AG	BGI_novel_T000085	gi|571474079|ref|XP_006586116.1;PREDICTED: uncharacterized protein LOC100804602 [Glycine max];gi|734426472|gb|KHN43807.1;hypothetical protein glysoja_035660 [Glycine soja]	10	UGUACAACAAAAGCAUGCAGCA&UGUUGCAUGU-GUUGUUGGUUU	NA	ko00010(Glycolysis / Gluconeogenesis);ko00051(Fructose and mannose metabolism);ko01100(Metabolic pathways);ko00030(Pentose phosphate pathway);ko01110(Biosynthesis of secondary metabolites)
ahy-MIR3513-p3_1ss5AG	BGI_novel_T000166	gi|571543461|ref|XP_006602078.1;PREDICTED: ubiquitin-activating enzyme E1 1-like [Glycine max];gi|356537581|ref|XP_003537305.1;PREDICTED: ubiquitin-activating enzyme E1 1-like isoform X1 [Glycine max]	7.5	GAACUGACAACAGA-GCAGCU&UGUUGCAUGUGUUGUUGGUUU	GO:0005829(cytosol);GO:0044237(cellular metabolic process);GO:0005488(binding);GO:1901564(organonitrogen compound metabolic process);GO:0043231(intracellular membrane-bounded organelle);GO:0016874(ligase activity);GO:0043167(ion binding);GO:0044444(cytoplasmic part);GO:0005524(ATP binding);GO:0004839(ubiquitin activating enzyme activity);GO:0005634(nucleus);GO:0036211(protein modification process…	ko04120(Ubiquitin mediated proteolysis)
ahy-MIR3513-p3_1ss5AG	BGI_novel_T000737	gi|593329192|ref|XP_007138023.1;hypothetical protein PHAVU_009G174700g [Phaseolus vulgaris]	8	GAAGCAGCAGCAGCA-GCAGCA&UGUUGCAUG-UGUUGUUGGUUU	GO:0008152(metabolic process);GO:0005840(ribosome);GO:0005623(cell);GO:0009987(cellular process);GO:1901566(organonitrogen compound biosynthetic process);GO:1990904(ribonucleoprotein complex);GO:0044464(cell part);GO:0044446(intracellular organelle part);GO:0044271(cellular nitrogen compound biosynthetic process);GO:0043226(organelle);GO:1901564(organonitrogen compound metabolic process);GO:00329…	ko03010(Ribosome)
ahy-MIR3513-p3_1ss5AG	BGI_novel_T001012	gi|947070573|gb|KRH19464.1;hypothetical protein GLYMA_13G118200 [Glycine max];gi|955379803|ref|XP_003550580.3;PREDICTED: SWI/SNF-related matrix-associated actin-dependent regulator of chromatin subfamily A-like protein 1 [Glycine max];gi|947070574|gb|KRH19465.1;hypothetical protein GLYMA_13G118200 [Glycine max];gi|947053037|gb|KRH02490.1;hypothetical protein GLYMA_17G041700 [Glycine max];gi|94705…	7.5	CAGCCAAUGAUAGAUGCGAUA&UGUUGCAUGUGUUGUUGGUUU	GO:0035639(purine ribonucleoside triphosphate binding);GO:0005524(ATP binding);GO:0032555(purine ribonucleotide binding);GO:0017076(purine nucleotide binding);GO:0032559(adenyl ribonucleotide binding);GO:0097367(carbohydrate derivative binding);GO:0030554(adenyl nucleotide binding);GO:0005488(binding);GO:0032553(ribonucleotide binding);GO:0043167(ion binding);GO:1901363(heterocyclic compound bind…	NA
ahy-MIR3513-p3_1ss5AG	BGI_novel_T001214	gi|955357174|ref|XP_014620946.1;PREDICTED: SWI/SNF-related matrix-associated actin-dependent regulator of chromatin subfamily A-like protein 1 isoform X2 [Glycine max]	7.5	CAGCCAAUGAUAGAUGCGAUA&UGUUGCAUGUGUUGUUGGUUU	NA	NA
ahy-MIR3513-p3_1ss5AG	BGI_novel_T001315	gi|593784215|ref|XP_007155148.1;hypothetical protein PHAVU_003G177400g [Phaseolus vulgaris]	10	UCCUCAGCAGCACCAGCAGCA&UGUUGCAUGUGUUGUUGGUUU	GO:0044446(intracellular organelle part);GO:0003700(DNA binding transcription factor activity);GO:0006508(proteolysis);GO:0046872(metal ion binding);GO:0034641(cellular nitrogen compound metabolic process);GO:0031325(positive regulation of cellular metabolic process);GO:0043229(intracellular organelle);GO:0061695(transferase complex, transferring phosphorus-containing groups);GO:0045893(positive …	ko03022(Basal transcription factors)
ahy-MIR3513-p3_1ss5AG	BGI_novel_T001316	gi|593784215|ref|XP_007155148.1;hypothetical protein PHAVU_003G177400g [Phaseolus vulgaris]	10	UCCUCAGCAGCACCAGCAGCA&UGUUGCAUGUGUUGUUGGUUU	GO:0044446(intracellular organelle part);GO:0003700(DNA binding transcription factor activity);GO:0006508(proteolysis);GO:0046872(metal ion binding);GO:0034641(cellular nitrogen compound metabolic process);GO:0031325(positive regulation of cellular metabolic process);GO:0043229(intracellular organelle);GO:0061695(transferase complex, transferring phosphorus-containing groups);GO:0045893(positive …	ko03022(Basal transcription factors)
ahy-MIR3513-p3_1ss5AG	BGI_novel_T001571	gi|645244228|ref|XP_008228334.1;PREDICTED: E3 ubiquitin-protein ligase RNF144B [Prunus mume];gi|951055753|ref|XP_014521574.1;PREDICTED: probable E3 ubiquitin-protein ligase ARI10 [Vigna radiata var. radiata]	9	UCACCGACGGCAGAAGCAGCA&UGUUGCAUGUGUUGUUGGUUU	GO:0030162(regulation of proteolysis);GO:0005515(protein binding);GO:0051171(regulation of nitrogen compound metabolic process);GO:0042787(protein ubiquitination involved in ubiquitin-dependent protein catabolic process);GO:0051173(positive regulation of nitrogen compound metabolic process);GO:1902494(catalytic complex);GO:0050794(regulation of cellular process);GO:0009987(cellular process);GO:00…	NA
ahy-MIR3513-p3_1ss5AG	BGI_novel_T002677	gi|734416918|gb|KHN38635.1;hypothetical protein glysoja_008184 [Glycine soja]	4.5	CAGCCAGUAAUACAUGUAACA&UGUUGCAUGUGUUGUUGGUUU	NA	NA
ahy-MIR3513-p3_1ss5AG	BGI_novel_T002680	gi|734416918|gb|KHN38635.1;hypothetical protein glysoja_008184 [Glycine soja]	4.5	CAGCCAGUAAUACAUGUAACA&UGUUGCAUGUGUUGUUGGUUU	NA	NA
ahy-MIR3513-p3_1ss5AG	BGI_novel_T003062	gi|502111642|ref|XP_004494120.1;PREDICTED: pentatricopeptide repeat-containing protein At5g03800 [Cicer arietinum]	9.5	CGGCCAGCAAUUACAUGCCGCG&UGUUGCAUGUG-UUGUUGGUUU	GO:0032502(developmental process);GO:1901363(heterocyclic compound binding);GO:0016070(RNA metabolic process);GO:0043412(macromolecule modification);GO:0010154(fruit development);GO:0043231(intracellular membrane-bounded organelle);GO:0061458(reproductive system development);GO:0097159(organic cyclic compound binding);GO:0009790(embryo development);GO:0006807(nitrogen compound metabolic process);…	NA
ahy-MIR3513-p3_1ss5AG	BGI_novel_T003292	gi|190411131|gb|ACE78321.1;cation-chloride cotransporter-like protein [Lotus tenuis]	15	GAGCUUGCAAGGACACGCAUGCAGCA&UGUUGCAUGUGU-----UGUUGGUUU	GO:0044422(organelle part);GO:0051649(establishment of localization in cell);GO:0044425(membrane part);GO:0043231(intracellular membrane-bounded organelle);GO:0051234(establishment of localization);GO:0019866(organelle inner membrane);GO:0044444(cytoplasmic part);GO:0005743(mitochondrial inner membrane);GO:0006839(mitochondrial transport);GO:0031975(envelope);GO:0005739(mitochondrion);GO:0044424(…	NA
ahy-MIR3513-p3_1ss5AG	BGI_novel_T003324	gi|571439495|ref|XP_006574879.1;PREDICTED: mediator of RNA polymerase II transcription subunit 25 [Glycine max]	6.5	GCAGCAGCAACAAAUGCAGCA&UGUUGCAUGUGUUGUUGGUUU	NA	NA
ahy-MIR3513-p3_1ss5AG	BGI_novel_T003631	gi|571520172|ref|XP_006597948.1;PREDICTED: uncharacterized protein LOC100776264 [Glycine max];gi|947063624|gb|KRH12885.1;hypothetical protein GLYMA_15G202000 [Glycine max]	11	GAGCCUGGCAGCAUGUGCGGUU&UGUUGCAUGUGUUGUU-GGUUU	NA	ko04075(Plant hormone signal transduction);ko04016(MAPK signaling pathway - plant)
ahy-MIR3513-p3_1ss5AG	BGI_novel_T003634	gi|571520172|ref|XP_006597948.1;PREDICTED: uncharacterized protein LOC100776264 [Glycine max];gi|947063624|gb|KRH12885.1;hypothetical protein GLYMA_15G202000 [Glycine max]	11	GAGCCUGGCAGCAUGUGCGGUU&UGUUGCAUGUGUUGUU-GGUUU	NA	ko04075(Plant hormone signal transduction);ko04016(MAPK signaling pathway - plant)
ahy-MIR3513-p3_1ss5AG	BGI_novel_T003659	gi|955334093|ref|XP_006584795.2;PREDICTED: probable zinc protease PqqL [Glycine max];gi|920718670|gb|KOM57867.1;hypothetical protein LR48_Vigan11g090000 [Vigna angularis];gi|955321928|ref|XP_006580490.2;PREDICTED: probable zinc protease PqqL isoform X1 [Glycine max]	6.5	AAAUUAAGGACAUCAUGCAGCU&UGUUGCAUG-UGUUGUUGGUUU	GO:0006807(nitrogen compound metabolic process);GO:0070011(peptidase activity, acting on L-amino acid peptides);GO:0008233(peptidase activity);GO:0004222(metalloendopeptidase activity);GO:0005488(binding);GO:0043170(macromolecule metabolic process);GO:0004175(endopeptidase activity);GO:0003824(catalytic activity);GO:0071704(organic substance metabolic process);GO:0019538(protein metabolic process…	NA
ahy-MIR3513-p3_1ss5AG	BGI_novel_T004844	gi|502079291|ref|XP_004486214.1;PREDICTED: transcription initiation factor IIF subunit alpha [Cicer arietinum];gi|593694278|ref|XP_007147660.1;hypothetical protein PHAVU_006G143600g [Phaseolus vulgaris];gi|965600349|dbj|BAT87527.1;hypothetical protein VIGAN_05090900 [Vigna angularis var. angularis]	14.5	AAACCAGCAGCAGCAGGGGCAACU&UGUUGC---AUGUGUUGUUGGUUU	GO:0043226(organelle);GO:0005623(cell);GO:0031224(intrinsic component of membrane);GO:0031328(positive regulation of cellular biosynthetic process);GO:0010628(positive regulation of gene expression);GO:0044424(intracellular part);GO:0043231(intracellular membrane-bounded organelle);GO:0009893(positive regulation of metabolic process);GO:0051252(regulation of RNA metabolic process);GO:0031325(posi…	ko03022(Basal transcription factors)
ahy-MIR3513-p3_1ss5AG	BGI_novel_T005377	gi|950954026|ref|XP_014496320.1;PREDICTED: preprotein translocase subunit SCY2, chloroplastic [Vigna radiata var. radiata];gi|920683381|gb|KOM30107.1;hypothetical protein LR48_Vigan902s000400 [Vigna angularis];gi|502109502|ref|XP_004493661.1;PREDICTED: preprotein translocase subunit SCY2, chloroplastic [Cicer arietinum]	8	GAACCAGAAUCGCAUGCAGCC&UGUUGCAUGUGUUGUUGGUUU	GO:0031967(organelle envelope);GO:0005737(cytoplasm);GO:0015031(protein transport);GO:0043226(organelle);GO:0006810(transport);GO:0071702(organic substance transport);GO:0044464(cell part);GO:0009536(plastid);GO:0044446(intracellular organelle part);GO:0051179(localization);GO:0009526(plastid envelope);GO:0071705(nitrogen compound transport);GO:0044422(organelle part);GO:0031224(intrinsic compone…	ko04145(Phagosome);ko03060(Protein export);ko04141(Protein processing in endoplasmic reticulum)
ahy-MIR3513-p3_1ss5AG	BGI_novel_T005964	gi|502148857|ref|XP_004507297.1;PREDICTED: probable tRNA (guanine(26)-N(2))-dimethyltransferase 1 isoform X3 [Cicer arietinum];gi|502148853|ref|XP_004507295.1;PREDICTED: probable tRNA (guanine(26)-N(2))-dimethyltransferase 1 isoform X1 [Cicer arietinum];gi|502148855|ref|XP_004507296.1;PREDICTED: probable tRNA (guanine(26)-N(2))-dimethyltransferase 1 isoform X2 [Cicer arietinum]	10	UCGCCGGCGGCAGAAGCAACU&UGUUGCAUGUGUUGUUGGUUU	NA	NA
ahy-MIR3513-p3_1ss5AG	BGI_novel_T006136	gi|356495970|ref|XP_003516843.1;PREDICTED: plastidal glycolate/glycerate translocator 1, chloroplastic-like [Glycine max];gi|593790328|ref|XP_007158203.1;hypothetical protein PHAVU_002G132800g [Phaseolus vulgaris]	9	UUCCCAACAGCACUUGGGACA&UGUUGCAUGUGUUGUUGGUUU	GO:0009526(plastid envelope);GO:0043227(membrane-bounded organelle);GO:0009528(plastid inner membrane);GO:0071840(cellular component organization or biogenesis);GO:0043229(intracellular organelle);GO:0016020(membrane);GO:0044464(cell part);GO:0009706(chloroplast inner membrane);GO:0009507(chloroplast);GO:0031224(intrinsic component of membrane);GO:0009536(plastid);GO:0006996(organelle organizatio…	NA
ahy-MIR3513-p3_1ss5AG	BGI_novel_T006619	gi|218186089|gb|EEC68516.1;hypothetical protein OsI_36791 [Oryza sativa Indica Group]	16	CCACCAACAACACCGCUACUGCAGCU&UGUUGCA-----UGUGUUGUUGGUUU	GO:0016491(oxidoreductase activity);GO:0006807(nitrogen compound metabolic process);GO:0046914(transition metal ion binding);GO:0005488(binding);GO:0008152(metabolic process);GO:0003824(catalytic activity);GO:0046872(metal ion binding);GO:0008131(primary amine oxidase activity);GO:0043167(ion binding);GO:0005507(copper ion binding);GO:0048037(cofactor binding);GO:0071704(organic substance metabol…	ko01100(Metabolic pathways);ko00360(Phenylalanine metabolism);ko00410(beta-Alanine metabolism);ko00950(Isoquinoline alkaloid biosynthesis);ko00960(Tropane, piperidine and pyridine alkaloid biosynthesis);ko01110(Biosynthesis of secondary metabolites);ko00350(Tyrosine metabolism);ko00260(Glycine, serine and threonine metabolism)
ahy-MIR3513-p3_1ss5AG	BGI_novel_T006672	gi|571519170|ref|XP_006597798.1;PREDICTED: pathogenesis-related homeodomain protein-like isoform X1 [Glycine max];gi|502085745|ref|XP_004487993.1;PREDICTED: pathogenesis-related homeodomain protein [Cicer arietinum];gi|955371769|ref|XP_014623468.1;PREDICTED: pathogenesis-related homeodomain protein-like isoform X2 [Glycine max];gi|593330695|ref|XP_007138774.1;hypothetical protein PHAVU_009G236200…	8	UCUGCGACGGCACAUGCAAUC&UGUUGCAUGUGUUGUUGGUUU	GO:0005634(nucleus);GO:0003676(nucleic acid binding);GO:0097159(organic cyclic compound binding);GO:0043169(cation binding);GO:0005623(cell);GO:0043231(intracellular membrane-bounded organelle);GO:0044464(cell part);GO:0043226(organelle);GO:0003677(DNA binding);GO:0005622(intracellular);GO:0043227(membrane-bounded organelle);GO:0043167(ion binding);GO:0046914(transition metal ion binding);GO:0005…	ko03018(RNA degradation)
ahy-MIR3513-p3_1ss5AG	BGI_novel_T006772	gi|965603595|dbj|BAT90772.1;hypothetical protein VIGAN_06205700 [Vigna angularis var. angularis];gi|147785731|emb|CAN73088.1;hypothetical protein VITISV_030762 [Vitis vinifera]	6	GAACCAGCAG-AC-UGCAACA&UGUUGCAUGUGUUGUUGGUUU	NA	ko00052(Galactose metabolism)
ahy-MIR3513-p3_1ss5AG	BGI_novel_T006789	gi|593788770|ref|XP_007157424.1;hypothetical protein PHAVU_002G069100g [Phaseolus vulgaris];gi|574139405|emb|CCW28804.1;hypothetical protein ARAX_ADH177M04-005 [Arachis duranensis]	6.5	GAACCGGCUGCACAUGUAGCU&UGUUGCAUGUGUUGUUGGUUU	GO:0016462(pyrophosphatase activity);GO:0016787(hydrolase activity);GO:0016817(hydrolase activity, acting on acid anhydrides);GO:0003824(catalytic activity);GO:0016818(hydrolase activity, acting on acid anhydrides, in phosphorus-containing anhydrides)	NA
ahy-MIR3513-p3_1ss5AG	BGI_novel_T006863	gi|828294513|ref|XP_012568317.1;PREDICTED: ureide permease 2-like isoform X1 [Cicer arietinum];gi|502094312|ref|XP_004490188.1;PREDICTED: ureide permease 2-like isoform X2 [Cicer arietinum]	8.5	CAAGCAGCAGGAUAUGCGGCA&UGUUGCAUGUGUUGUUGGUUU	GO:0044425(membrane part);GO:0031224(intrinsic component of membrane);GO:0006810(transport);GO:0051234(establishment of localization);GO:0071705(nitrogen compound transport);GO:0016020(membrane);GO:0051179(localization);GO:0016021(integral component of membrane)	NA
ahy-MIR3513-p3_1ss5AG	BGI_novel_T006864	gi|828294513|ref|XP_012568317.1;PREDICTED: ureide permease 2-like isoform X1 [Cicer arietinum];gi|502094312|ref|XP_004490188.1;PREDICTED: ureide permease 2-like isoform X2 [Cicer arietinum]	8.5	CAAGCAGCAGGAUAUGCGGCA&UGUUGCAUGUGUUGUUGGUUU	GO:0044425(membrane part);GO:0031224(intrinsic component of membrane);GO:0006810(transport);GO:0051234(establishment of localization);GO:0071705(nitrogen compound transport);GO:0016020(membrane);GO:0051179(localization);GO:0016021(integral component of membrane)	NA
ahy-MIR3513-p3_1ss5AG	BGI_novel_T007080	gi|356527769|ref|XP_003532480.1;PREDICTED: CRS2-associated factor 1, chloroplastic-like [Glycine max];gi|922338653|ref|XP_013447316.1;CRS2-associated factor 1 [Medicago truncatula]	9	GGACCAGCGACG-AUGCCGCG&UGUUGCAUGUGUUGUUGGUUU	NA	NA
ahy-MIR3513-p3_1ss5AG	BGI_novel_T007182	gi|356520645|ref|XP_003528971.1;PREDICTED: serine/threonine-protein kinase EDR1 isoform X1 [Glycine max];gi|571478141|ref|XP_006587479.1;PREDICTED: serine/threonine-protein kinase EDR1-like isoform X2 [Glycine max]	12.5	GAAUCAACGAUAUGCACAUGCAAGA&UGUUGCAUGUGU----UGUUGGUUU	GO:0016773(phosphotransferase activity, alcohol group as acceptor);GO:1901564(organonitrogen compound metabolic process);GO:1901265(nucleoside phosphate binding);GO:0050794(regulation of cellular process);GO:0043170(macromolecule metabolic process);GO:0000166(nucleotide binding);GO:0016310(phosphorylation);GO:0009987(cellular process);GO:0005622(intracellular);GO:1901363(heterocyclic compound bin…	NA
ahy-MIR3513-p3_1ss5AG	BGI_novel_T007482	gi|922385618|ref|XP_003593050.2;vacuolar protein sorting-associated protein, putative [Medicago truncatula];gi|951006894|ref|XP_014508574.1;PREDICTED: uncharacterized protein LOC106768127 isoform X2 [Vigna radiata var. radiata]	5	UAAUCAGCAAUGCAUGCAGCA&UGUUGCAUGUGUUGUUGGUUU	NA	NA
ahy-MIR3513-p3_1ss5AG	BGI_novel_T008506	gi|922395217|ref|XP_003588571.2;2-on-2 hemoglobin [Medicago truncatula];gi|502124477|ref|XP_004498545.1;PREDICTED: two-on-two hemoglobin-3 [Cicer arietinum]	23.5	AAACCAGCAAGUGCCAUGCAAGCAUGCAGCA&UGUUGCAUGU-------GU---UGUUGGUUU	GO:0005488(binding);GO:0097159(organic cyclic compound binding);GO:0020037(heme binding);GO:1901363(heterocyclic compound binding);GO:0019825(oxygen binding);GO:0046906(tetrapyrrole binding)	NA
ahy-MIR3513-p3_1ss5AG	BGI_novel_T008639	gi|502170387|ref|XP_004514819.1;PREDICTED: phosphoglucan phosphatase LSF1, chloroplastic isoform X1 [Cicer arietinum];gi|356573817|ref|XP_003555052.1;PREDICTED: phosphoglucan phosphatase LSF1, chloroplastic-like [Glycine max]	13.5	AGGCCAGCAAUUGCAUGGGCAACA&UGUUGCAUGUGU---UGUUGGUUU	GO:0016787(hydrolase activity);GO:1901564(organonitrogen compound metabolic process);GO:0004721(phosphoprotein phosphatase activity);GO:0044267(cellular protein metabolic process);GO:0005975(carbohydrate metabolic process);GO:0044264(cellular polysaccharide metabolic process);GO:0009057(macromolecule catabolic process);GO:0044237(cellular metabolic process);GO:0071704(organic substance metabolic …	ko01100(Metabolic pathways);ko00520(Amino sugar and nucleotide sugar metabolism);ko00051(Fructose and mannose metabolism)
ahy-MIR3513-p3_1ss5AG	BGI_novel_T008654	gi|734360295|gb|KHN15380.1;E3 ubiquitin-protein ligase BRE1-like 1 [Glycine soja]	7.5	AAACCAGCAUAUGC-UGCAGCA&UGUUGCAUGUGU-UGUUGGUUU	GO:0008270(zinc ion binding);GO:0043167(ion binding);GO:0046872(metal ion binding);GO:0046914(transition metal ion binding);GO:0043169(cation binding);GO:0005488(binding)	NA
ahy-MIR3513-p3_1ss5AG	BGI_novel_T009636	gi|950978847|ref|XP_014501754.1;PREDICTED: protein FLX-like 1 isoform X1 [Vigna radiata var. radiata];gi|950978865|ref|XP_014501757.1;PREDICTED: protein FLX-like 1 isoform X2 [Vigna radiata var. radiata]	12	AGGCCGCGCAGCACGAGCUGCAACG&UGUUGCA---UGUGUUGU-UGGUUU	NA	ko01100(Metabolic pathways);ko01200(Carbon metabolism);ko00620(Pyruvate metabolism);ko00020(Citrate cycle (TCA cycle));ko03013(RNA transport);ko00010(Glycolysis / Gluconeogenesis);ko01110(Biosynthesis of secondary metabolites)
ahy-MIR3513-p3_1ss5AG	BGI_novel_T009901	gi|571514732|ref|XP_006597144.1;PREDICTED: uncharacterized protein LOC100779103 isoform X2 [Glycine max];gi|356550559|ref|XP_003543653.1;PREDICTED: uncharacterized protein LOC100816837 isoform X1 [Glycine max]	7.5	AAACUGGCAGCACAAGCAGGA&UGUUGCAUGUGUUGUUGGUUU	GO:0046916(cellular transition metal ion homeostasis);GO:0006812(cation transport);GO:0009987(cellular process);GO:0050801(ion homeostasis);GO:0042592(homeostatic process);GO:0065007(biological regulation);GO:0043169(cation binding);GO:0098771(inorganic ion homeostasis);GO:0044464(cell part);GO:0043167(ion binding);GO:0046872(metal ion binding);GO:0046914(transition metal ion binding);GO:0030003(…	ko03015(mRNA surveillance pathway);ko03013(RNA transport)
ahy-MIR3513-p3_1ss5AG	BGI_novel_T009944	gi|922385546|ref|XP_003592893.2;zinc finger CCCH domain protein, putative [Medicago truncatula];gi|571471724|ref|XP_006585389.1;PREDICTED: zinc finger CCCH domain-containing protein 5-like isoform X2 [Glycine max];gi|566168313|ref|XP_006385082.1;hypothetical protein POPTR_0004s23730g [Populus trichocarpa];gi|140053486|gb|ABO80461.1;Concanavalin A-like lectin/glucanase; U2 auxiliary factor small s…	9.5	UCACCGGCGGCAGAAGCAACU&UGUUGCAUGUGUUGUUGGUUU	GO:0097159(organic cyclic compound binding);GO:1901363(heterocyclic compound binding);GO:0005488(binding);GO:0003676(nucleic acid binding)	ko03040(Spliceosome)
ahy-MIR3513-p3_1ss5AG	BGI_novel_T010996	gi|502090769|ref|XP_004489334.1;PREDICTED: senescence-associated carboxylesterase 101 isoform X1 [Cicer arietinum];gi|734363074|gb|KHN16343.1;hypothetical protein glysoja_041437 [Glycine soja]	8	AUUCCAACAGCACAGGC-ACA&UGUUGCAUGUGUUGUUGGUUU	NA	ko04626(Plant-pathogen interaction)
ahy-MIR3513-p3_1ss5AG	BGI_novel_T011268	gi|951068758|ref|XP_014489864.1;PREDICTED: GATA transcription factor 28 [Vigna radiata var. radiata];gi|571472616|ref|XP_006585660.1;PREDICTED: GATA transcription factor 28-like isoform X1 [Glycine max]	8.5	GGGCCAAGAACACUCUGCAAUG&UGUUGCA-UGUGUUGUUGGUUU	GO:0008270(zinc ion binding);GO:0003677(DNA binding);GO:0009889(regulation of biosynthetic process);GO:0046914(transition metal ion binding);GO:0010556(regulation of macromolecule biosynthetic process);GO:0019222(regulation of metabolic process);GO:0050789(regulation of biological process);GO:0097159(organic cyclic compound binding);GO:0043565(sequence-specific DNA binding);GO:0065007(biological …	ko04712(Circadian rhythm - plant)
ahy-MIR3513-p3_1ss5AG	BGI_novel_T011295	gi|593267108|ref|XP_007135732.1;hypothetical protein PHAVU_010G153700g [Phaseolus vulgaris];gi|388518917|gb|AFK47520.1;unknown [Lotus japonicus]	10.5	GUGCCAGCGAUGCG-GCGACU&UGUUGCAUGUGUUGUUGGUUU	GO:0046914(transition metal ion binding);GO:0008270(zinc ion binding);GO:0043169(cation binding);GO:0043167(ion binding);GO:0005488(binding);GO:0046872(metal ion binding)	ko03022(Basal transcription factors)
ahy-MIR3513-p3_1ss5AG	BGI_novel_T011320	gi|734393568|gb|KHN28254.1;G-type lectin S-receptor-like serine/threonine-protein kinase CES101 [Glycine soja];gi|571512227|ref|XP_006596544.1;PREDICTED: thaumatin-like protein 1 [Glycine max];gi|571514788|ref|XP_006597152.1;PREDICTED: G-type lectin S-receptor-like serine/threonine-protein kinase CES101 [Glycine max];gi|698521946|ref|XP_009757784.1;PREDICTED: cysteine-rich receptor-like protein k…	7	AAACCAACAACAAUUGCAUACU&UGU-UGCAUGUGUUGUUGGUUU	GO:0008152(metabolic process);GO:0004674(protein serine/threonine kinase activity);GO:0043412(macromolecule modification);GO:0043168(anion binding);GO:0055044(symplast);GO:0016798(hydrolase activity, acting on glycosyl bonds);GO:0009987(cellular process);GO:0030054(cell junction);GO:0006950(response to stress);GO:0044238(primary metabolic process);GO:0006464(cellular protein modification process)…	ko01100(Metabolic pathways);ko00520(Amino sugar and nucleotide sugar metabolism);ko03440(Homologous recombination)
ahy-MIR3513-p3_1ss5AG	BGI_novel_T011977	gi|357440785|ref|XP_003590670.1;phenazine biosynthesis PhzC/PhzF family protein [Medicago truncatula]	6	GAACCAGCAG-AC-UGCAACA&UGUUGCAUGUGUUGUUGGUUU	NA	ko00052(Galactose metabolism)
ahy-MIR3513-p3_1ss5AG	BGI_novel_T012028	-	18	CAGCCUAGCAACACACUCGAGCUGCAGCA&UGUUGCA-------UGUGUUGUU-GGUUU	NA	NA
ahy-MIR3513-p3_1ss5AG	BGI_novel_T012145	gi|828303353|ref|XP_012569842.1;PREDICTED: uncharacterized protein LOC101501999 isoform X1 [Cicer arietinum]	8	GGACCAACCCAAAACACAUGGAACC&UGUUGCAUGUGUU----GUUGGUUU	GO:0003824(catalytic activity);GO:0005622(intracellular);GO:0005737(cytoplasm);GO:0008757(S-adenosylmethionine-dependent methyltransferase activity);GO:0005623(cell);GO:0016491(oxidoreductase activity);GO:0044424(intracellular part);GO:0016740(transferase activity);GO:0032259(methylation);GO:0008152(metabolic process);GO:0055114(oxidation-reduction process);GO:0044464(cell part);GO:0008168(methyl…	NA
ahy-MIR3513-p3_1ss5AG	BGI_novel_T012145	gi|828303353|ref|XP_012569842.1;PREDICTED: uncharacterized protein LOC101501999 isoform X1 [Cicer arietinum]	11.5	AAACCAGCAGCAUGGAGUGCAAUU&UGUUGCAU---GUGUUGUUGGUUU	GO:0003824(catalytic activity);GO:0005622(intracellular);GO:0005737(cytoplasm);GO:0008757(S-adenosylmethionine-dependent methyltransferase activity);GO:0005623(cell);GO:0016491(oxidoreductase activity);GO:0044424(intracellular part);GO:0016740(transferase activity);GO:0032259(methylation);GO:0008152(metabolic process);GO:0055114(oxidation-reduction process);GO:0044464(cell part);GO:0008168(methyl…	NA
ahy-MIR3513-p3_1ss5AG	BGI_novel_T012562	gi|502121125|ref|XP_004497196.1;PREDICTED: dnaJ homolog subfamily C member 17 [Cicer arietinum];gi|356536396|ref|XP_003536724.1;PREDICTED: dnaJ homolog subfamily C member 17-like isoform X2 [Glycine max]	21	CGACCAGCAGCGCCGCCAGGAGCAGCG&UGUUGCAU------GUGUUGUUGGUUU	GO:0000166(nucleotide binding);GO:0097159(organic cyclic compound binding);GO:0044464(cell part);GO:0044444(cytoplasmic part);GO:1901265(nucleoside phosphate binding);GO:0005488(binding);GO:0005737(cytoplasm);GO:0044424(intracellular part);GO:0003676(nucleic acid binding);GO:1901363(heterocyclic compound binding);GO:0005829(cytosol);GO:0036094(small molecule binding);GO:0005622(intracellular);GO:…	NA
ahy-MIR3513-p3_1ss5AG	BGI_novel_T012582	gi|951016441|ref|XP_014511120.1;PREDICTED: E3 ubiquitin-protein ligase CIP8 [Vigna radiata var. radiata];gi|593597422|ref|XP_007142752.1;hypothetical protein PHAVU_007G014100g [Phaseolus vulgaris]	11.5	CGCCCAGUCAGCGCGUGACGACG&UGUUG-CAUGUGUUG-UUGGUUU	GO:0044267(cellular protein metabolic process);GO:0005622(intracellular);GO:0044424(intracellular part);GO:0006464(cellular protein modification process);GO:0044237(cellular metabolic process);GO:0044238(primary metabolic process);GO:0032446(protein modification by small protein conjugation);GO:0005623(cell);GO:0009987(cellular process);GO:0071704(organic substance metabolic process);GO:0043412(m…	NA
ahy-MIR3513-p3_1ss5AG	BGI_novel_T013138	gi|947094577|gb|KRH43162.1;hypothetical protein GLYMA_08G134400 [Glycine max];gi|571490472|ref|XP_006591500.1;PREDICTED: chaperone protein DnaJ [Glycine max]	12.5	GAACCGGAGAAACAUCAACACCAUGCAGCA&UGUUGCAUG-UGUUG--------UUGGUUU	GO:0017076(purine nucleotide binding);GO:0050896(response to stimulus);GO:1901363(heterocyclic compound binding);GO:0005488(binding);GO:0097159(organic cyclic compound binding);GO:0009266(response to temperature stimulus);GO:0006457(protein folding);GO:0032555(purine ribonucleotide binding);GO:0000166(nucleotide binding);GO:0032559(adenyl ribonucleotide binding);GO:0009987(cellular process);GO:00…	NA
ahy-MIR3513-p3_1ss5AG	BGI_novel_T013294	gi|502142915|ref|XP_004505151.1;PREDICTED: protein IQ-DOMAIN 14 [Cicer arietinum];gi|920687865|gb|KOM31848.1;hypothetical protein LR48_Vigan01g140400 [Vigna angularis]	8.5	AUGCCAUGAAACAUAUGCAGCU&UGUUGCAUGUGUU-GUUGGUUU	NA	ko03015(mRNA surveillance pathway)
ahy-MIR3513-p3_1ss5AG	BGI_novel_T013865	gi|922346568|ref|XP_013450198.1;late embryogenesis abundant hydroxyproline-rich glycoprotein [Medicago truncatula]	10	AACCCAACAGAACACAUGCAAGCA&UGUU-GCAUGUGU--UGUUGGUUU	GO:0016020(membrane);GO:0044425(membrane part);GO:0044459(plasma membrane part);GO:0030054(cell junction);GO:0005623(cell);GO:0009987(cellular process);GO:0031226(intrinsic component of plasma membrane);GO:0016021(integral component of membrane);GO:0055044(symplast);GO:0050794(regulation of cellular process);GO:0005911(cell-cell junction);GO:0007165(signal transduction);GO:0006950(response to str…	ko00040(Pentose and glucuronate interconversions);ko01100(Metabolic pathways)
ahy-MIR3513-p3_1ss5AG	XM_016076283.2	gi|502096441|ref|XP_004490738.1;PREDICTED: KH domain-containing protein At3g08620-like isoform X2 [Cicer arietinum]	8	AAACCAACAACUCUUGUGGCU&UGUUGCAUGUGUUGUUGGUUU	GO:0097159(organic cyclic compound binding);GO:1901363(heterocyclic compound binding);GO:0005488(binding);GO:0003676(nucleic acid binding);GO:0003723(RNA binding)	NA
ahy-MIR3513-p3_1ss5AG	XM_016076982.2	gi|950978847|ref|XP_014501754.1;PREDICTED: protein FLX-like 1 isoform X1 [Vigna radiata var. radiata];gi|950978865|ref|XP_014501757.1;PREDICTED: protein FLX-like 1 isoform X2 [Vigna radiata var. radiata]	12	AGGCCGCGCAGCACGAGCUGCAACG&UGUUGCA---UGUGUUGU-UGGUUU	NA	ko01100(Metabolic pathways);ko01200(Carbon metabolism);ko00620(Pyruvate metabolism);ko00020(Citrate cycle (TCA cycle));ko03013(RNA transport);ko00010(Glycolysis / Gluconeogenesis);ko01110(Biosynthesis of secondary metabolites)
ahy-MIR3513-p3_1ss5AG	XM_016077227.2	gi|661897974|emb|CDO97941.1;unnamed protein product [Coffea canephora]	12.5	CAGCCGGCAGCACACGCCGUG&UGUUGCAUGUGUUGUUGGUUU	GO:0005622(intracellular);GO:0046907(intracellular transport);GO:0005623(cell);GO:0007034(vacuolar transport);GO:0051179(localization);GO:0051641(cellular localization);GO:0044464(cell part);GO:0051649(establishment of localization in cell);GO:0051234(establishment of localization);GO:0006810(transport)	ko04144(Endocytosis)
ahy-MIR3513-p3_1ss5AG	XM_016077356.2	gi|955381725|ref|XP_014625691.1;PREDICTED: uncharacterized protein LOC100527893 isoform X1 [Glycine max];gi|951046031|ref|XP_014519077.1;PREDICTED: uridine kinase-like protein 3 [Vigna radiata var. radiata]	8.5	CAACCGACAACAUCGGCGACU&UGUUGCAUGUGUUGUUGGUUU	GO:0019206(nucleoside kinase activity);GO:0072527(pyrimidine-containing compound metabolic process);GO:0016772(transferase activity, transferring phosphorus-containing groups);GO:0006206(pyrimidine nucleobase metabolic process);GO:0006220(pyrimidine nucleotide metabolic process);GO:0009156(ribonucleoside monophosphate biosynthetic process);GO:0044281(small molecule metabolic process);GO:0009173(p…	ko01100(Metabolic pathways);ko00240(Pyrimidine metabolism)
ahy-MIR3513-p3_1ss5AG	XM_016078472.2	gi|224065789|ref|XP_002301962.1;hypothetical protein POPTR_0002s02120g [Populus trichocarpa]	10	CCGCCAGCAGCA---GCAACA&UGUUGCAUGUGUUGUUGGUUU	NA	NA
ahy-MIR3513-p3_1ss5AG	XM_016078494.2	gi|356517980|ref|XP_003527662.1;PREDICTED: putative HVA22-like protein g [Glycine max]	9	CAAUCAGCAGCACCUGCAGAG&UGUUGCAUGUGUUGUUGGUUU	GO:0008152(metabolic process);GO:0044425(membrane part);GO:0016021(integral component of membrane);GO:0016020(membrane);GO:0016491(oxidoreductase activity);GO:0055114(oxidation-reduction process);GO:0031224(intrinsic component of membrane);GO:0003824(catalytic activity)	NA
ahy-MIR3513-p3_1ss5AG	XM_016078777.2	gi|947112937|gb|KRH61239.1;hypothetical protein GLYMA_04G036300 [Glycine max];gi|734322471|gb|KHN04526.1;Mitogen-activated protein kinase kinase kinase 1 [Glycine soja];gi|593268950|ref|XP_007136652.1;hypothetical protein PHAVU_009G062400g [Phaseolus vulgaris]	8.5	UGGCCAUCGACAUAUGGAGCU&UGUUGCAUGUGUUGUUGGUUU	GO:0004871(signal transducer activity);GO:0043170(macromolecule metabolic process);GO:0044237(cellular metabolic process);GO:0005737(cytoplasm);GO:0016301(kinase activity);GO:0006796(phosphate-containing compound metabolic process);GO:0016773(phosphotransferase activity, alcohol group as acceptor);GO:0004672(protein kinase activity);GO:0000166(nucleotide binding);GO:0019538(protein metabolic proc…	NA
ahy-MIR3513-p3_1ss5AG	XM_016078778.2	gi|947112937|gb|KRH61239.1;hypothetical protein GLYMA_04G036300 [Glycine max];gi|734322471|gb|KHN04526.1;Mitogen-activated protein kinase kinase kinase 1 [Glycine soja];gi|593268950|ref|XP_007136652.1;hypothetical protein PHAVU_009G062400g [Phaseolus vulgaris]	8.5	UGGCCAUCGACAUAUGGAGCU&UGUUGCAUGUGUUGUUGGUUU	GO:0004871(signal transducer activity);GO:0043170(macromolecule metabolic process);GO:0044237(cellular metabolic process);GO:0005737(cytoplasm);GO:0016301(kinase activity);GO:0006796(phosphate-containing compound metabolic process);GO:0016773(phosphotransferase activity, alcohol group as acceptor);GO:0004672(protein kinase activity);GO:0000166(nucleotide binding);GO:0019538(protein metabolic proc…	NA
ahy-MIR3513-p3_1ss5AG	XM_016078780.2	gi|356564176|ref|XP_003550332.1;PREDICTED: polyadenylate-binding protein 2 [Glycine max]	9	GUGCCGAUGAUGCA-GCAGCA&UGUUGCAUGUGUUGUUGGUUU	GO:0044424(intracellular part);GO:0097159(organic cyclic compound binding);GO:0005623(cell);GO:0005488(binding);GO:1901265(nucleoside phosphate binding);GO:0000166(nucleotide binding);GO:0036094(small molecule binding);GO:1901363(heterocyclic compound binding);GO:0044464(cell part);GO:0003723(RNA binding);GO:0005622(intracellular);GO:0005737(cytoplasm);GO:0003676(nucleic acid binding)	ko03015(mRNA surveillance pathway);ko03013(RNA transport);ko03018(RNA degradation)
ahy-MIR3513-p3_1ss5AG	XM_016078950.2	gi|920698246|gb|KOM41471.1;hypothetical protein LR48_Vigan04g166900 [Vigna angularis]	7.5	UCACCAGCAACAACA-GCAGCA&UGUUGCAUGU-GUUGUUGGUUU	NA	NA
ahy-MIR3513-p3_1ss5AG	XM_016079077.2	gi|502135900|ref|XP_004502492.1;PREDICTED: IAA-amino acid hydrolase ILR1-like 6 [Cicer arietinum]	8.5	GGUGCAGCAGCACAUGCCACC&UGUUGCAUGUGUUGUUGGUUU	GO:0001101(response to acid chemical);GO:0009719(response to endogenous stimulus);GO:0044237(cellular metabolic process);GO:0031224(intrinsic component of membrane);GO:0016810(hydrolase activity, acting on carbon-nitrogen (but not peptide) bonds);GO:0042221(response to chemical);GO:0009725(response to hormone);GO:0008152(metabolic process);GO:0044425(membrane part);GO:0043436(oxoacid metabolic pr…	NA
ahy-MIR3513-p3_1ss5AG	XM_016079164.2	gi|226425249|gb|ACO53624.1;acetyl-CoA carboxylase 1 [Arachis hypogaea]	12	CUGCCAGCAGCACAAGUUGCAAUU&UGUUGCA---UGUGUUGUUGGUUU	NA	ko00640(Propanoate metabolism);ko01100(Metabolic pathways);ko01110(Biosynthesis of secondary metabolites);ko01212(Fatty acid metabolism);ko00061(Fatty acid biosynthesis);ko00620(Pyruvate metabolism)
ahy-MIR3513-p3_1ss5AG	XM_016080012.2	gi|356557515|ref|XP_003547061.1;PREDICTED: transcription factor bHLH122-like isoform X3 [Glycine max];gi|734397365|gb|KHN30120.1;Transcription factor bHLH122 [Glycine soja]	8.5	ACACCAGCAGCAGCA-GCAGCA&UGUUGCAUG-UGUUGUUGGUUU	GO:0005622(intracellular);GO:0044271(cellular nitrogen compound biosynthetic process);GO:0044238(primary metabolic process);GO:0009059(macromolecule biosynthetic process);GO:0044212(transcription regulatory region DNA binding);GO:0003677(DNA binding);GO:0003700(DNA binding transcription factor activity);GO:0009058(biosynthetic process);GO:1901576(organic substance biosynthetic process);GO:0001046…	ko04075(Plant hormone signal transduction);ko04712(Circadian rhythm - plant);ko04141(Protein processing in endoplasmic reticulum)
ahy-MIR3513-p3_1ss5AG	XM_016080034.2	gi|356550410|ref|XP_003543580.1;PREDICTED: eukaryotic initiation factor 4A-10 [Glycine max]	6	GAACUGGCAAGACA-GCAACA&UGUUGCAUGUGUUGUUGGUUU	GO:0043167(ion binding);GO:0005488(binding);GO:1901363(heterocyclic compound binding);GO:1901265(nucleoside phosphate binding);GO:0032559(adenyl ribonucleotide binding);GO:0016817(hydrolase activity, acting on acid anhydrides);GO:0004386(helicase activity);GO:0000166(nucleotide binding);GO:0016818(hydrolase activity, acting on acid anhydrides, in phosphorus-containing anhydrides);GO:0030554(adeny…	ko03013(RNA transport)
ahy-MIR3513-p3_1ss5AG	XM_016080176.2	gi|734397476|gb|KHN30231.1;Ethylene-responsive transcription factor RAP2-7 [Glycine soja];gi|571502704|ref|XP_006595001.1;PREDICTED: ethylene-responsive transcription factor RAP2-7-like isoform X2 [Glycine max];gi|593699588|ref|XP_007150248.1;hypothetical protein PHAVU_005G138300g [Phaseolus vulgaris]	7	GAAGCAGCAGCAACA-GCAACA&UGUUGCAUGU-GUUGUUGGUUU	GO:2000112(regulation of cellular macromolecule biosynthetic process);GO:0019222(regulation of metabolic process);GO:0005634(nucleus);GO:0008152(metabolic process);GO:0034645(cellular macromolecule biosynthetic process);GO:0010467(gene expression);GO:0050794(regulation of cellular process);GO:0006351(transcription, DNA-templated);GO:0046483(heterocycle metabolic process);GO:0005623(cell);GO:00442…	NA
ahy-MIR3513-p3_1ss5AG	XM_016080177.2	gi|734397476|gb|KHN30231.1;Ethylene-responsive transcription factor RAP2-7 [Glycine soja];gi|571502704|ref|XP_006595001.1;PREDICTED: ethylene-responsive transcription factor RAP2-7-like isoform X2 [Glycine max];gi|593699588|ref|XP_007150248.1;hypothetical protein PHAVU_005G138300g [Phaseolus vulgaris]	7	GAAGCAGCAGCAACA-GCAACA&UGUUGCAUGU-GUUGUUGGUUU	GO:2000112(regulation of cellular macromolecule biosynthetic process);GO:0019222(regulation of metabolic process);GO:0005634(nucleus);GO:0008152(metabolic process);GO:0034645(cellular macromolecule biosynthetic process);GO:0010467(gene expression);GO:0050794(regulation of cellular process);GO:0006351(transcription, DNA-templated);GO:0046483(heterocycle metabolic process);GO:0005623(cell);GO:00442…	NA
ahy-MIR3513-p3_1ss5AG	XM_016080532.2	gi|356543756|ref|XP_003540326.1;PREDICTED: probable terpene synthase 11 [Glycine max]	6	UGGCC-AUGACGCAUGCAACU&UGUUGCAUGUGUUGUUGGUUU	GO:0043169(cation binding);GO:0046872(metal ion binding);GO:0008152(metabolic process);GO:0005488(binding);GO:0016835(carbon-oxygen lyase activity);GO:0000287(magnesium ion binding);GO:0003824(catalytic activity);GO:0010333(terpene synthase activity);GO:0016838(carbon-oxygen lyase activity, acting on phosphates);GO:0043167(ion binding);GO:0016829(lyase activity)	ko00902(Monoterpenoid biosynthesis);ko01110(Biosynthesis of secondary metabolites);ko01100(Metabolic pathways)
ahy-MIR3513-p3_1ss5AG	XM_016081016.2	gi|502084134|ref|XP_004487630.1;PREDICTED: scarecrow-like protein 21 [Cicer arietinum]	11.5	GGACCAGCAGCACA-GCCCUG&UGUUGCAUGUGUUGUUGGUUU	GO:0065007(biological regulation);GO:0019219(regulation of nucleobase-containing compound metabolic process);GO:1903506(regulation of nucleic acid-templated transcription);GO:1901363(heterocyclic compound binding);GO:0031326(regulation of cellular biosynthetic process);GO:0044464(cell part);GO:0043229(intracellular organelle);GO:0060255(regulation of macromolecule metabolic process);GO:0031323(re…	ko04075(Plant hormone signal transduction)
ahy-MIR3513-p3_1ss5AG	XM_016081592.2	gi|955372381|ref|XP_014623605.1;PREDICTED: dr1-associated corepressor-like isoform X2 [Glycine max]	9	AAAACGAUAGCACA-GCAGCA&UGUUGCAUGUGUUGUUGGUUU	GO:0043231(intracellular membrane-bounded organelle);GO:0005488(binding);GO:0005634(nucleus);GO:0046982(protein heterodimerization activity);GO:0044424(intracellular part);GO:0043229(intracellular organelle);GO:0005622(intracellular);GO:0005515(protein binding);GO:0046983(protein dimerization activity);GO:0043227(membrane-bounded organelle);GO:0043226(organelle);GO:0044464(cell part);GO:0005623(c…	NA
ahy-MIR3513-p3_1ss5AG	XM_016081703.2	gi|502090769|ref|XP_004489334.1;PREDICTED: senescence-associated carboxylesterase 101 isoform X1 [Cicer arietinum];gi|734363074|gb|KHN16343.1;hypothetical protein glysoja_041437 [Glycine soja]	8	AUUCCAACAGCACAGGC-ACA&UGUUGCAUGUGUUGUUGGUUU	NA	ko04626(Plant-pathogen interaction)
ahy-MIR3513-p3_1ss5AG	XM_016081819.2	gi|951002240|ref|XP_014507285.1;PREDICTED: 3-oxo-Delta(4,5)-steroid 5-beta-reductase-like [Vigna radiata var. radiata]	15	UAGCGCAGCAGCACGUGUGGGCAGCG&UGUUGC----AUGUGUUGUUG-GUUU	NA	NA
ahy-MIR3513-p3_1ss5AG	XM_016081842.2	gi|593783369|ref|XP_007154725.1;hypothetical protein PHAVU_003G142200g [Phaseolus vulgaris];gi|951002240|ref|XP_014507285.1;PREDICTED: 3-oxo-Delta(4,5)-steroid 5-beta-reductase-like [Vigna radiata var. radiata]	15	UAGCGCAGCAGCACGUGUGGGCAGCG&UGUUGC----AUGUGUUGUUG-GUUU	NA	NA
ahy-MIR3513-p3_1ss5AG	XM_016082369.2	gi|388515987|gb|AFK46055.1;unknown [Lotus japonicus]	10	CGACGAGCAAUAUAUCAUGCAACA&UGUUGCAUG---UGUUGUUGGUUU	GO:0008152(metabolic process);GO:0043226(organelle);GO:0044260(cellular macromolecule metabolic process);GO:0005737(cytoplasm);GO:0044267(cellular protein metabolic process);GO:0043227(membrane-bounded organelle);GO:0044248(cellular catabolic process);GO:0044237(cellular metabolic process);GO:0008233(peptidase activity);GO:0030163(protein catabolic process);GO:0044424(intracellular part);GO:19053…	ko03050(Proteasome)
ahy-MIR3513-p3_1ss5AG	XM_016082529.2	gi|951068758|ref|XP_014489864.1;PREDICTED: GATA transcription factor 28 [Vigna radiata var. radiata];gi|571472616|ref|XP_006585660.1;PREDICTED: GATA transcription factor 28-like isoform X1 [Glycine max]	8.5	GGGCCAAGAACACUCUGCAAUG&UGUUGCA-UGUGUUGUUGGUUU	GO:0008270(zinc ion binding);GO:0003677(DNA binding);GO:0009889(regulation of biosynthetic process);GO:0046914(transition metal ion binding);GO:0010556(regulation of macromolecule biosynthetic process);GO:0019222(regulation of metabolic process);GO:0050789(regulation of biological process);GO:0097159(organic cyclic compound binding);GO:0043565(sequence-specific DNA binding);GO:0065007(biological …	ko04712(Circadian rhythm - plant)
ahy-MIR3513-p3_1ss5AG	XM_016082583.2	gi|593267108|ref|XP_007135732.1;hypothetical protein PHAVU_010G153700g [Phaseolus vulgaris];gi|388518917|gb|AFK47520.1;unknown [Lotus japonicus]	10.5	GUGCCAGCGAUGCG-GCGACU&UGUUGCAUGUGUUGUUGGUUU	GO:0046914(transition metal ion binding);GO:0008270(zinc ion binding);GO:0043169(cation binding);GO:0043167(ion binding);GO:0005488(binding);GO:0046872(metal ion binding)	ko03022(Basal transcription factors)
ahy-MIR3513-p3_1ss5AG	XM_016082821.2	gi|593700695|ref|XP_007150783.1;hypothetical protein PHAVU_005G180200g [Phaseolus vulgaris]	4	AAUACAACAA-ACAUGCAACA&UGUUGCAUGUGUUGUUGGUUU	GO:2000112(regulation of cellular macromolecule biosynthetic process);GO:0019219(regulation of nucleobase-containing compound metabolic process);GO:0006355(regulation of transcription, DNA-templated);GO:2001141(regulation of RNA biosynthetic process);GO:0050794(regulation of cellular process);GO:0060255(regulation of macromolecule metabolic process);GO:1903506(regulation of nucleic acid-templated…	NA
ahy-MIR3513-p3_1ss5AG	XM_016083330.2	gi|593782389|ref|XP_007154235.1;hypothetical protein PHAVU_003G101700g [Phaseolus vulgaris]	9	GAACUAACAAGGAGGUGCGACA&UGUUGCAUGU-GUUGUUGGUUU	GO:0032559(adenyl ribonucleotide binding);GO:0006996(organelle organization);GO:0035639(purine ribonucleoside triphosphate binding);GO:0044428(nuclear part);GO:0043227(membrane-bounded organelle);GO:0016887(ATPase activity);GO:0003676(nucleic acid binding);GO:0070013(intracellular organelle lumen);GO:0070603(SWI/SNF superfamily-type complex);GO:0031974(membrane-enclosed lumen);GO:0044424(intracel…	NA
ahy-MIR3513-p3_1ss5AG	XM_016084113.2	gi|951030417|ref|XP_014514892.1;PREDICTED: actin cytoskeleton-regulatory complex protein pan1-like [Vigna radiata var. radiata]	8	UCACCAACAACACCUAUGCAAUC&UGUUGCAU--GUGUUGUUGGUUU	GO:0003824(catalytic activity)	ko03020(RNA polymerase);ko01100(Metabolic pathways);ko00230(Purine metabolism);ko00240(Pyrimidine metabolism)
ahy-MIR3513-p3_1ss5AG	XM_016084298.1	gi|596176681|ref|XP_007223232.1;hypothetical protein PRUPE_ppa003791mg [Prunus persica]	8	ACAGCAACAAUACAUGGCAGCU&UGUUGC-AUGUGUUGUUGGUUU	GO:0006873(cellular ion homeostasis);GO:0098771(inorganic ion homeostasis);GO:0055080(cation homeostasis);GO:0005488(binding);GO:0043169(cation binding);GO:0055076(transition metal ion homeostasis);GO:0042592(homeostatic process);GO:0046914(transition metal ion binding);GO:0050801(ion homeostasis);GO:0051179(localization);GO:0046916(cellular transition metal ion homeostasis);GO:0009987(cellular p…	NA
ahy-MIR3513-p3_1ss5AG	XM_016084900.2	gi|951009885|ref|XP_014509407.1;PREDICTED: DEAD-box ATP-dependent RNA helicase 21 [Vigna radiata var. radiata]	11	ACACCGAGGACACAUCUCGCGACA&UGUUGC---AUGUGUUGUUGGUUU	GO:0032559(adenyl ribonucleotide binding);GO:0016462(pyrophosphatase activity);GO:0043168(anion binding);GO:0003824(catalytic activity);GO:1901363(heterocyclic compound binding);GO:0005524(ATP binding);GO:0005488(binding);GO:0097159(organic cyclic compound binding);GO:0030554(adenyl nucleotide binding);GO:0016787(hydrolase activity);GO:0017076(purine nucleotide binding);GO:0043167(ion binding);GO…	ko03040(Spliceosome)
ahy-MIR3513-p3_1ss5AG	XM_016085218.2	gi|502116279|ref|XP_004495363.1;PREDICTED: putative protein phosphatase 2C-like protein 44 [Cicer arietinum]	10	AUGCCAAUAACACAUGGAUAU&UGUUGCAUGUGUUGUUGGUUU	GO:0006470(protein dephosphorylation);GO:0042578(phosphoric ester hydrolase activity);GO:0044237(cellular metabolic process);GO:0044267(cellular protein metabolic process);GO:0019538(protein metabolic process);GO:0044238(primary metabolic process);GO:0003824(catalytic activity);GO:0006807(nitrogen compound metabolic process);GO:0016787(hydrolase activity);GO:0016791(phosphatase activity);GO:00434…	NA
ahy-MIR3513-p3_1ss5AG	XM_016085305.2	gi|225469636|ref|XP_002265147.1;PREDICTED: uncharacterized protein LOC100252669 [Vitis vinifera]	9	CCACCAACAAUAACGGCAACA&UGUUGCAUGUGUUGUUGGUUU	NA	NA
ahy-MIR3513-p3_1ss5AG	XM_016085374.2	gi|828303353|ref|XP_012569842.1;PREDICTED: uncharacterized protein LOC101501999 isoform X1 [Cicer arietinum]	8	GGACCAACCCAAAACACAUGGAACC&UGUUGCAUGUGUU----GUUGGUUU	GO:0003824(catalytic activity);GO:0005622(intracellular);GO:0005737(cytoplasm);GO:0008757(S-adenosylmethionine-dependent methyltransferase activity);GO:0005623(cell);GO:0016491(oxidoreductase activity);GO:0044424(intracellular part);GO:0016740(transferase activity);GO:0032259(methylation);GO:0008152(metabolic process);GO:0055114(oxidation-reduction process);GO:0044464(cell part);GO:0008168(methyl…	NA
ahy-MIR3513-p3_1ss5AG	XM_016085529.1	gi|593686997|ref|XP_007144163.1;hypothetical protein PHAVU_007G134000g [Phaseolus vulgaris];gi|951019994|ref|XP_014512284.1;PREDICTED: nuclear transcription factor Y subunit B-1-like isoform X1 [Vigna radiata var. radiata]	9	ACGCCAAGGACACAAUGCAGGA&UGUUGCAU-GUGUUGUUGGUUU	GO:0031326(regulation of cellular biosynthetic process);GO:0043231(intracellular membrane-bounded organelle);GO:0051252(regulation of RNA metabolic process);GO:0005488(binding);GO:0044424(intracellular part);GO:0043565(sequence-specific DNA binding);GO:0051171(regulation of nitrogen compound metabolic process);GO:1903506(regulation of nucleic acid-templated transcription);GO:0050794(regulation of…	NA
ahy-MIR3513-p3_1ss5AG	XM_016085788.2	gi|955393771|ref|XP_003555714.3;PREDICTED: probable pectate lyase 8 [Glycine max]	7.5	AAGCCAGGGACAU-UGCGGCA&UGUUGCAUGUGUUGUUGGUUU	GO:0005975(carbohydrate metabolic process);GO:0005976(polysaccharide metabolic process);GO:0043169(cation binding);GO:0043167(ion binding);GO:0043170(macromolecule metabolic process);GO:0030570(pectate lyase activity);GO:0005488(binding);GO:0045488(pectin metabolic process);GO:0044238(primary metabolic process);GO:0016835(carbon-oxygen lyase activity);GO:1901575(organic substance catabolic proces…	ko00040(Pentose and glucuronate interconversions)
ahy-MIR3513-p3_1ss5AG	XM_016086193.2	gi|947086877|gb|KRH35598.1;hypothetical protein GLYMA_10G252400 [Glycine max]	7.5	CUGCCAGUAAUAUGUGCAGCA&UGUUGCAUGUGUUGUUGGUUU	GO:0016020(membrane)	NA
ahy-MIR3513-p3_1ss5AG	XM_016086600.2	gi|502121125|ref|XP_004497196.1;PREDICTED: dnaJ homolog subfamily C member 17 [Cicer arietinum];gi|356536396|ref|XP_003536724.1;PREDICTED: dnaJ homolog subfamily C member 17-like isoform X2 [Glycine max]	21	CGACCAGCAGCGCCGCCAGGAGCAGCG&UGUUGCAU------GUGUUGUUGGUUU	GO:0000166(nucleotide binding);GO:0097159(organic cyclic compound binding);GO:0044464(cell part);GO:0044444(cytoplasmic part);GO:1901265(nucleoside phosphate binding);GO:0005488(binding);GO:0005737(cytoplasm);GO:0044424(intracellular part);GO:0003676(nucleic acid binding);GO:1901363(heterocyclic compound binding);GO:0005829(cytosol);GO:0036094(small molecule binding);GO:0005622(intracellular);GO:…	NA
ahy-MIR3513-p3_1ss5AG	XM_016087037.2	gi|566006161|ref|NP_001274375.1;uncharacterized protein LOC100794925 [Glycine max]	7	AAGCCGACGAACACA-GCUGCA&UGUUGCAUGUGUU-GUUGGUUU	GO:0009889(regulation of biosynthetic process);GO:2000112(regulation of cellular macromolecule biosynthetic process);GO:0031326(regulation of cellular biosynthetic process);GO:0031224(intrinsic component of membrane);GO:0006355(regulation of transcription, DNA-templated);GO:0019219(regulation of nucleobase-containing compound metabolic process);GO:0005488(binding);GO:0031323(regulation of cellula…	ko03013(RNA transport);ko03018(RNA degradation);ko01100(Metabolic pathways);ko04141(Protein processing in endoplasmic reticulum);ko04120(Ubiquitin mediated proteolysis);ko00561(Glycerolipid metabolism);ko03015(mRNA surveillance pathway)
ahy-MIR3513-p3_1ss5AG	XM_016087151.1	gi|951025162|ref|XP_014513610.1;PREDICTED: aquaporin PIP2-1 [Vigna radiata var. radiata]	11	AAGCCGGCGGUGAUAUGUGCGGCG&UGUUGCAUGUGUU---GUUGGUUU	GO:0016020(membrane);GO:0016021(integral component of membrane);GO:0031224(intrinsic component of membrane);GO:0006810(transport);GO:0005215(transporter activity);GO:0044425(membrane part);GO:0051234(establishment of localization);GO:0051179(localization)	NA
ahy-MIR3513-p3_1ss5AG	XM_016087379.2	gi|720064303|ref|XP_010275911.1;PREDICTED: auxin response factor 6-like isoform X2 [Nelumbo nucifera];gi|571499695|ref|XP_006594517.1;PREDICTED: auxin response factor 6 isoform X1 [Glycine max];gi|357447187|ref|XP_003593869.1;auxin response factor 2 [Medicago truncatula]	7.5	CAACCAGCAACA---GCAACA&UGUUGCAUGUGUUGUUGGUUU	GO:0071310(cellular response to organic substance);GO:0005622(intracellular);GO:0043231(intracellular membrane-bounded organelle);GO:0043229(intracellular organelle);GO:0060255(regulation of macromolecule metabolic process);GO:0009734(auxin-activated signaling pathway);GO:0051716(cellular response to stimulus);GO:0009755(hormone-mediated signaling pathway);GO:0010033(response to organic substance…	ko04075(Plant hormone signal transduction)
ahy-MIR3513-p3_1ss5AG	XM_016087628.2	gi|951038227|ref|XP_014517109.1;PREDICTED: plant cysteine oxidase 5-like [Vigna radiata var. radiata]	7	AGACCAGCAACACUAGCAAGA&UGUUGCAUGUGUUGUUGGUUU	GO:0043170(macromolecule metabolic process);GO:0003824(catalytic activity);GO:0036211(protein modification process);GO:0044237(cellular metabolic process);GO:0070482(response to oxygen levels);GO:0051213(dioxygenase activity);GO:0045333(cellular respiration);GO:0070483(detection of hypoxia);GO:0019538(protein metabolic process);GO:0050896(response to stimulus);GO:0009061(anaerobic respiration);GO…	ko00430(Taurine and hypotaurine metabolism);ko01100(Metabolic pathways)
ahy-MIR3513-p3_1ss5AG	XM_016087910.2	gi|951044911|ref|XP_014518779.1;PREDICTED: fatty acid amide hydrolase [Vigna radiata var. radiata]	10	ACACCAACAACUGGCAUGACAGCA&UGUUG-CAUGU--GUUGUUGGUUU	GO:0003824(catalytic activity);GO:0016884(carbon-nitrogen ligase activity, with glutamine as amido-N-donor);GO:0016879(ligase activity, forming carbon-nitrogen bonds);GO:0016874(ligase activity)	ko00970(Aminoacyl-tRNA biosynthesis);ko01100(Metabolic pathways)
ahy-MIR3513-p3_1ss5AG	XM_016087931.2	gi|356555068|ref|XP_003545861.1;PREDICTED: katanin p80 WD40 repeat-containing subunit B1 homolog isoform X1 [Glycine max]	8	GGUCCAACAAUUCGUGCAACU&UGUUGCAUGUGUUGUUGGUUU	GO:0008017(microtubule binding);GO:0007010(cytoskeleton organization);GO:0099080(supramolecular complex);GO:0015630(microtubule cytoskeleton);GO:0044422(organelle part);GO:0008352(katanin complex);GO:0005622(intracellular);GO:0099081(supramolecular polymer);GO:0099512(supramolecular fiber);GO:0043226(organelle);GO:0032991(macromolecular complex);GO:0005875(microtubule associated complex);GO:00444…	NA
ahy-MIR3513-p3_1ss5AG	XM_016088540.2	gi|920689149|gb|KOM33132.1;hypothetical protein LR48_Vigan01g268800 [Vigna angularis]	11	AAGCCAAUAGCUUCGGCGACA&UGUUGCAUGUGUUGUUGGUUU	GO:0005515(protein binding);GO:0005488(binding);GO:0003779(actin binding);GO:0008092(cytoskeletal protein binding)	NA
ahy-MIR3513-p3_1ss5AG	XM_016088662.2	gi|947054369|gb|KRH03822.1;hypothetical protein GLYMA_17G122200 [Glycine max]	6.5	AGACCACAAACAACAUAUGCACCA&UGUUGCAUGUGUUGU---UGGUUU	GO:0044424(intracellular part);GO:0051171(regulation of nitrogen compound metabolic process);GO:0065007(biological regulation);GO:0009889(regulation of biosynthetic process);GO:0001067(regulatory region nucleic acid binding);GO:0051252(regulation of RNA metabolic process);GO:0003676(nucleic acid binding);GO:0060255(regulation of macromolecule metabolic process);GO:2000112(regulation of cellular m…	ko01100(Metabolic pathways);ko01110(Biosynthesis of secondary metabolites);ko01230(Biosynthesis of amino acids);ko00260(Glycine, serine and threonine metabolism);ko02010(ABC transporters)
ahy-MIR3513-p3_1ss5AG	XM_016088983.2	gi|502142915|ref|XP_004505151.1;PREDICTED: protein IQ-DOMAIN 14 [Cicer arietinum];gi|920687865|gb|KOM31848.1;hypothetical protein LR48_Vigan01g140400 [Vigna angularis]	8.5	AUGCCAUGAAACAUAUGCAGCU&UGUUGCAUGUGUU-GUUGGUUU	NA	ko03015(mRNA surveillance pathway)
ahy-MIR3513-p3_1ss5AG	XM_016088984.2	gi|502142915|ref|XP_004505151.1;PREDICTED: protein IQ-DOMAIN 14 [Cicer arietinum];gi|920687865|gb|KOM31848.1;hypothetical protein LR48_Vigan01g140400 [Vigna angularis]	8.5	AUGCCAUGAAACAUAUGCAGCU&UGUUGCAUGUGUU-GUUGGUUU	NA	ko03015(mRNA surveillance pathway)
ahy-MIR3513-p3_1ss5AG	XM_016089067.2	gi|947067444|gb|KRH16587.1;hypothetical protein GLYMA_14G163900 [Glycine max];gi|571510589|ref|XP_006596302.1;PREDICTED: uncharacterized protein At1g04910-like [Glycine max]	9.5	UAACCAGCAACGCUCUGCGAUU&UGUUGCA-UGUGUUGUUGGUUU	GO:0016020(membrane);GO:0016021(integral component of membrane);GO:0044425(membrane part);GO:0031224(intrinsic component of membrane)	ko03010(Ribosome)
ahy-MIR3513-p3_1ss5AG	XM_016089595.2	gi|920697446|gb|KOM40671.1;hypothetical protein LR48_Vigan04g086900 [Vigna angularis]	8	GGGCCAGCAACGUGAGCAAUA&UGUUGCAUGUGUUGUUGGUUU	GO:0098660(inorganic ion transmembrane transport);GO:0098662(inorganic cation transmembrane transport);GO:0034220(ion transmembrane transport);GO:0006811(ion transport);GO:0030001(metal ion transport);GO:0015075(ion transmembrane transporter activity);GO:0098655(cation transmembrane transport);GO:0071805(potassium ion transmembrane transport);GO:0044425(membrane part);GO:0016020(membrane);GO:0015…	NA
ahy-MIR3513-p3_1ss5AG	XM_016089851.2	gi|734400074|gb|KHN31160.1;ABC transporter G family member 5 [Glycine soja]	7.5	AGAUCAGCAGCAAGUGCCACA&UGUUGCAUGUGUUGUUGGUUU	GO:0016462(pyrophosphatase activity);GO:0043167(ion binding);GO:0042626(ATPase activity, coupled to transmembrane movement of substances);GO:0006810(transport);GO:0016817(hydrolase activity, acting on acid anhydrides);GO:0030554(adenyl nucleotide binding);GO:0016021(integral component of membrane);GO:0036094(small molecule binding);GO:0032553(ribonucleotide binding);GO:0022804(active transmembran…	ko02010(ABC transporters)
ahy-MIR3513-p3_1ss5AG	XM_016090041.2	gi|731386241|ref|XP_010648799.1;PREDICTED: pentatricopeptide repeat-containing protein At4g33170 [Vitis vinifera];gi|920698878|gb|KOM42103.1;hypothetical protein LR48_Vigan04g230100 [Vigna angularis]	15	AUCUCAGCAGCACAUUAAUGGCAACA&UGUUGC-----AUGUGUUGUUGGUUU	NA	ko03440(Homologous recombination)
ahy-MIR3513-p3_1ss5AG	XM_016090521.2	gi|955390289|ref|XP_014627633.1;PREDICTED: LOW QUALITY PROTEIN: ABC transporter B family member 15-like [Glycine max]	7.5	GAGCCAGCACUAUUUGCAACA&UGUUGCAUGUGUUGUUGGUUU	NA	ko02010(ABC transporters)
ahy-MIR3513-p3_1ss5AG	XM_016090546.2	gi|502133905|ref|XP_004501930.1;PREDICTED: probable inactive poly [ADP-ribose] polymerase SRO2 isoform X1 [Cicer arietinum]	10.5	GAGCGUGGCGGCGCAUGCGAAG&UGUUGCAUGUGUUGUU-GGUUU	NA	NA
ahy-MIR3513-p3_1ss5AG	XM_016090616.2	gi|356550795|ref|XP_003543769.1;PREDICTED: ABC transporter B family member 19 isoform X1 [Glycine max]	8	AGGCUUGCAACGGAUGCAGCU&UGUUGCAUGUGUUGUUGGUUU	GO:0032555(purine ribonucleotide binding);GO:0042221(response to chemical);GO:0043167(ion binding);GO:0022804(active transmembrane transporter activity);GO:0006810(transport);GO:0016818(hydrolase activity, acting on acid anhydrides, in phosphorus-containing anhydrides);GO:0035639(purine ribonucleoside triphosphate binding);GO:0042493(response to drug);GO:0008559(xenobiotic transmembrane transport…	ko02010(ABC transporters)
ahy-MIR3513-p3_1ss5AG	XM_016091001.2	gi|502108060|ref|XP_004493378.1;PREDICTED: putative SWI/SNF-related matrix-associated actin-dependent regulator of chromatin subfamily A member 3-like 1 [Cicer arietinum]	12.5	UGACCAAUUACAGCACGUGCGUUA&UGUUGCAUGUGUUGU---UGGUUU	GO:0043169(cation binding);GO:0003824(catalytic activity);GO:0016787(hydrolase activity);GO:0016818(hydrolase activity, acting on acid anhydrides, in phosphorus-containing anhydrides);GO:0046872(metal ion binding);GO:0016817(hydrolase activity, acting on acid anhydrides);GO:0043167(ion binding);GO:0097159(organic cyclic compound binding);GO:1901363(heterocyclic compound binding);GO:0005488(bindin…	NA
ahy-MIR3513-p3_1ss5AG	XM_016091522.2	gi|356549567|ref|XP_003543164.1;PREDICTED: translation initiation factor eIF-2B subunit beta [Glycine max]	9.5	UUCGCAGCAGCGCGUGCCACA&UGUUGCAUGUGUUGUUGGUUU	GO:0044093(positive regulation of molecular function);GO:0080090(regulation of primary metabolic process);GO:0000096(sulfur amino acid metabolic process);GO:0005851(eukaryotic translation initiation factor 2B complex);GO:0010556(regulation of macromolecule biosynthetic process);GO:0044238(primary metabolic process);GO:0009987(cellular process);GO:0009889(regulation of biosynthetic process);GO:003…	ko03013(RNA transport)
ahy-MIR3513-p3_1ss5AG	XM_016092475.2	gi|955328405|ref|XP_014632872.1;PREDICTED: formin-like protein 1, partial [Glycine max]	5.5	CCACCACCGACACA-GCAACA&UGUUGCAUGUGUUGUUGGUUU	GO:0016020(membrane)	NA
ahy-MIR3513-p3_1ss5AG	XM_016093709.2	gi|356536883|ref|XP_003536962.1;PREDICTED: probable 125 kDa kinesin-related protein [Glycine max];gi|571497985|ref|XP_003541394.2;PREDICTED: 125 kDa kinesin-related protein-like [Glycine max]	7	AAACUAGCAACACCUUGCAAGA&UGUUGCA-UGUGUUGUUGGUUU	GO:0003777(microtubule motor activity);GO:0017111(nucleoside-triphosphatase activity);GO:0044430(cytoskeletal part);GO:0003774(motor activity);GO:0043232(intracellular non-membrane-bounded organelle);GO:0005856(cytoskeleton);GO:0016818(hydrolase activity, acting on acid anhydrides, in phosphorus-containing anhydrides);GO:0007018(microtubule-based movement);GO:1990939(ATP-dependent microtubule mot…	NA
ahy-MIR3513-p3_1ss5AG	XM_016093709.2	gi|356536883|ref|XP_003536962.1;PREDICTED: probable 125 kDa kinesin-related protein [Glycine max];gi|571497985|ref|XP_003541394.2;PREDICTED: 125 kDa kinesin-related protein-like [Glycine max]	10	AAGCCAACGAUGUUAUAUGCAAUA&UGUUGCAUGU---GUUGUUGGUUU	GO:0003777(microtubule motor activity);GO:0017111(nucleoside-triphosphatase activity);GO:0044430(cytoskeletal part);GO:0003774(motor activity);GO:0043232(intracellular non-membrane-bounded organelle);GO:0005856(cytoskeleton);GO:0016818(hydrolase activity, acting on acid anhydrides, in phosphorus-containing anhydrides);GO:0007018(microtubule-based movement);GO:1990939(ATP-dependent microtubule mot…	NA
ahy-MIR3513-p3_1ss5AG	XM_016094273.2	gi|502122755|ref|XP_004497885.1;PREDICTED: centromere-associated protein E isoform X2 [Cicer arietinum];gi|356561998|ref|XP_003549262.1;PREDICTED: kinesin-related protein 4 isoform X2 [Glycine max];gi|950983304|ref|XP_014502743.1;PREDICTED: centromere-associated protein E isoform X1 [Vigna radiata var. radiata]	8.5	AGACCAACAGAAACAUGUUACA&UGUUGCAUGU-GUUGUUGGUUU	GO:0015630(microtubule cytoskeleton);GO:0005623(cell);GO:0030554(adenyl nucleotide binding);GO:0007017(microtubule-based process);GO:0005515(protein binding);GO:0005524(ATP binding);GO:0036094(small molecule binding);GO:1901363(heterocyclic compound binding);GO:0005875(microtubule associated complex);GO:0044422(organelle part);GO:0008092(cytoskeletal protein binding);GO:0005488(binding);GO:190126…	NA
ahy-MIR3513-p3_1ss5AG	XM_016094283.2	gi|571482330|ref|XP_006588921.1;PREDICTED: DNA-directed RNA polymerase I subunit 1-like [Glycine max]	8	GAACCAGCAACACAAAUGACC&UGUUGCAUGUGUUGUUGGUUU	GO:0044452(nucleolar part);GO:0044271(cellular nitrogen compound biosynthetic process);GO:0006807(nitrogen compound metabolic process);GO:0043167(ion binding);GO:0044424(intracellular part);GO:0043232(intracellular non-membrane-bounded organelle);GO:0001054(RNA polymerase I activity);GO:0032774(RNA biosynthetic process);GO:0003676(nucleic acid binding);GO:0005730(nucleolus);GO:0010467(gene expres…	ko00230(Purine metabolism);ko00240(Pyrimidine metabolism);ko01100(Metabolic pathways);ko03020(RNA polymerase)
ahy-MIR3513-p3_1ss5AG	XM_016095788.2	gi|571482179|ref|XP_006588877.1;PREDICTED: uncharacterized protein LOC100796676 [Glycine max]	7	CAACGCAGCGA-ACGUGCAGCA&UGUUGCAUGUGUUGUUG-GUUU	NA	NA
ahy-MIR3513-p3_1ss5AG	XM_016096496.2	gi|255543765|ref|XP_002512945.1;PREDICTED: bZIP transcription factor 53 [Ricinus communis]	9	AUGCCAAUAACACUAGCAAUG&UGUUGCAUGUGUUGUUGGUUU	GO:0010556(regulation of macromolecule biosynthetic process);GO:1901363(heterocyclic compound binding);GO:0050789(regulation of biological process);GO:0003676(nucleic acid binding);GO:0080090(regulation of primary metabolic process);GO:0097159(organic cyclic compound binding);GO:0003677(DNA binding);GO:0065007(biological regulation);GO:0050794(regulation of cellular process);GO:1903506(regulation…	NA
ahy-MIR3513-p3_1ss5AG	XM_016096554.2	gi|502161362|ref|XP_004512135.1;PREDICTED: calcium-dependent protein kinase 28 [Cicer arietinum];gi|357483761|ref|XP_003612167.1;calcium-dependent kinase [Medicago truncatula]	8.5	UCACCAGCAGCAGAAGCAACG&UGUUGCAUGUGUUGUUGGUUU	GO:0004672(protein kinase activity);GO:0044238(primary metabolic process);GO:0032555(purine ribonucleotide binding);GO:1901564(organonitrogen compound metabolic process);GO:0097159(organic cyclic compound binding);GO:0006796(phosphate-containing compound metabolic process);GO:0009987(cellular process);GO:0016740(transferase activity);GO:0046872(metal ion binding);GO:0006807(nitrogen compound meta…	ko04626(Plant-pathogen interaction)
ahy-MIR3513-p3_1ss5AG	XM_016096832.2	gi|502145176|ref|XP_004505914.1;PREDICTED: ankyrin repeat-containing protein At5g02620-like isoform X1 [Cicer arietinum]	8.5	AAGCCAACAACA---GCAGCU&UGUUGCAUGUGUUGUUGGUUU	GO:0031224(intrinsic component of membrane);GO:0016021(integral component of membrane);GO:0044425(membrane part);GO:0016020(membrane)	NA
ahy-MIR3513-p3_1ss5AG	XM_016097743.2	gi|356542784|ref|XP_003539845.1;PREDICTED: protein YLS9-like [Glycine max]	14	UAACCAACAGGUAACGCUUGCGACC&UGUUGCAUGUGU----UGUUGGUUU	GO:0065007(biological regulation);GO:0005911(cell-cell junction);GO:0051716(cellular response to stimulus);GO:0031225(anchored component of membrane);GO:0016021(integral component of membrane);GO:0031226(intrinsic component of plasma membrane);GO:0044425(membrane part);GO:0044464(cell part);GO:0006950(response to stress);GO:0071944(cell periphery);GO:0009506(plasmodesma);GO:0005886(plasma membran…	NA
ahy-MIR3513-p3_1ss5AG	XM_016097815.2	gi|358248588|ref|NP_001239651.1;uncharacterized protein LOC100784390 [Glycine max]	6.5	UCACCGCCAAUACAUCGCAACA&UGUUGC-AUGUGUUGUUGGUUU	GO:0043603(cellular amide metabolic process);GO:0019538(protein metabolic process);GO:1901363(heterocyclic compound binding);GO:0003676(nucleic acid binding);GO:0008135(translation factor activity, RNA binding);GO:0097159(organic cyclic compound binding);GO:0044249(cellular biosynthetic process);GO:0009058(biosynthetic process);GO:0044238(primary metabolic process);GO:0010467(gene expression);GO:…	ko03013(RNA transport)
ahy-MIR3513-p3_1ss5AG	XM_016097874.2	gi|734415285|gb|KHN37697.1;Ribosome-recycling factor [Glycine soja]	8.5	UGACCAAAGAGCACAUGCAGGC&UGUUGCAUGUGUU-GUUGGUUU	GO:0070126(mitochondrial translational termination);GO:0043226(organelle);GO:0043603(cellular amide metabolic process);GO:0043624(cellular protein complex disassembly);GO:0043227(membrane-bounded organelle);GO:0044238(primary metabolic process);GO:0044444(cytoplasmic part);GO:0043604(amide biosynthetic process);GO:0010467(gene expression);GO:0008152(metabolic process);GO:0044237(cellular metaboli…	NA
ahy-MIR3513-p3_1ss5AG	XM_016098210.2	gi|502143997|ref|XP_004505542.1;PREDICTED: 26S proteasome non-ATPase regulatory subunit 2 homolog A [Cicer arietinum];gi|357474441|ref|XP_003607505.1;26S proteasome regulatory subunit S2 1B [Medicago truncatula]	11.5	UCACCGACAGCACUUGCUGGACU&UGUU--GCAUGUGUUGUUGGUUU	GO:0006807(nitrogen compound metabolic process);GO:0005622(intracellular);GO:1905369(endopeptidase complex);GO:0044445(cytosolic part);GO:0030234(enzyme regulator activity);GO:0019538(protein metabolic process);GO:0042176(regulation of protein catabolic process);GO:0044265(cellular macromolecule catabolic process);GO:0043229(intracellular organelle);GO:0044424(intracellular part);GO:0044257(cellu…	ko03050(Proteasome)
ahy-MIR3513-p3_1ss5AG	XM_016099643.2	gi|951008715|ref|XP_014509087.1;PREDICTED: probable cadmium/zinc-transporting ATPase HMA1, chloroplastic [Vigna radiata var. radiata]	6.5	GCCCCAUUAGCAUAUGCAACA&UGUUGCAUGUGUUGUUGGUUU	NA	NA
ahy-MIR3513-p3_1ss5AG	XM_016099781.2	gi|593785729|ref|XP_007155905.1;hypothetical protein PHAVU_003G241900g [Phaseolus vulgaris]	12.5	UCACCAGCAGCUCAUGCCAUC&UGUUGCAUGUGUUGUUGGUUU	GO:0097159(organic cyclic compound binding);GO:0071704(organic substance metabolic process);GO:0044424(intracellular part);GO:0005622(intracellular);GO:0034641(cellular nitrogen compound metabolic process);GO:0006725(cellular aromatic compound metabolic process);GO:0003676(nucleic acid binding);GO:0097659(nucleic acid-templated transcription);GO:0005623(cell);GO:1901363(heterocyclic compound bind…	NA
ahy-MIR3513-p3_1ss5AG	XM_016100243.2	gi|571476920|ref|XP_006587114.1;PREDICTED: APO protein 2, chloroplastic-like [Glycine max]	12	ACACCAACAACGCAAUGGGCAGCA&UGUUGC---AUGUGUUGUUGGUUU	GO:0097159(organic cyclic compound binding);GO:0005488(binding);GO:0003676(nucleic acid binding);GO:0003723(RNA binding);GO:1901363(heterocyclic compound binding)	ko01100(Metabolic pathways);ko01110(Biosynthesis of secondary metabolites);ko00500(Starch and sucrose metabolism)
ahy-MIR3513-p3_1ss5AG	XM_016100534.2	gi|356511119|ref|XP_003524277.1;PREDICTED: uncharacterized protein LOC100807370 [Glycine max]	12	GAACCAGCAACACUUAGCAUCC&UGUUGC-AUGUGUUGUUGGUUU	GO:0005634(nucleus);GO:0005737(cytoplasm);GO:0005622(intracellular);GO:0044464(cell part);GO:0043226(organelle);GO:0043231(intracellular membrane-bounded organelle);GO:0043229(intracellular organelle);GO:0044424(intracellular part);GO:0043227(membrane-bounded organelle);GO:0005623(cell)	NA
ahy-MIR3513-p3_1ss5AG	XM_016100535.2	gi|356511119|ref|XP_003524277.1;PREDICTED: uncharacterized protein LOC100807370 [Glycine max]	12	GAACCAGCAACACUUAGCAUCC&UGUUGC-AUGUGUUGUUGGUUU	GO:0005634(nucleus);GO:0005737(cytoplasm);GO:0005622(intracellular);GO:0044464(cell part);GO:0043226(organelle);GO:0043231(intracellular membrane-bounded organelle);GO:0043229(intracellular organelle);GO:0044424(intracellular part);GO:0043227(membrane-bounded organelle);GO:0005623(cell)	NA
ahy-MIR3513-p3_1ss5AG	XM_016100692.2	gi|540360864|gb|AGV08374.1;malate dehydrogenase [Arachis hypogaea]	7.5	CUAUCAAUGGCAUAUGCAGCU&UGUUGCAUGUGUUGUUGGUUU	GO:0009987(cellular process);GO:0071704(organic substance metabolic process);GO:0006108(malate metabolic process);GO:0043648(dicarboxylic acid metabolic process);GO:0016615(malate dehydrogenase activity);GO:0006082(organic acid metabolic process);GO:0003824(catalytic activity);GO:0016491(oxidoreductase activity);GO:0005975(carbohydrate metabolic process);GO:0008152(metabolic process);GO:0044238(p…	ko01200(Carbon metabolism);ko00630(Glyoxylate and dicarboxylate metabolism);ko00710(Carbon fixation in photosynthetic organisms);ko01110(Biosynthesis of secondary metabolites);ko00270(Cysteine and methionine metabolism);ko00620(Pyruvate metabolism);ko01100(Metabolic pathways);ko00020(Citrate cycle (TCA cycle))
ahy-MIR3513-p3_1ss5AG	XM_016100758.2	gi|571466905|ref|XP_006583789.1;PREDICTED: uncharacterized protein LOC100781939 isoform X1 [Glycine max]	10	AUGCCAAUAAACCAGAUGCAGCA&UGUUGCAUGUG--UUGUUGGUUU	NA	ko04070(Phosphatidylinositol signaling system);ko00562(Inositol phosphate metabolism);ko04145(Phagosome)
ahy-MIR3513-p3_1ss5AG	XM_016100777.2	gi|593695509|ref|XP_007148253.1;hypothetical protein PHAVU_006G192900g [Phaseolus vulgaris]	5.5	ACAUCAACAAUAACAUGCAACA&UGUUGCAUGU-GUUGUUGGUUU	NA	NA
ahy-MIR3513-p3_1ss5AG	XM_016100840.2	gi|951038385|ref|XP_014517144.1;PREDICTED: dof zinc finger protein DOF3.2-like [Vigna radiata var. radiata]	5	AGAUCAACUACAGAUGCAGCA&UGUUGCAUGUGUUGUUGGUUU	NA	ko04712(Circadian rhythm - plant)
ahy-MIR3513-p3_1ss5AG	XM_016101309.2	gi|502158634|ref|XP_004511224.1;PREDICTED: sucrose transport protein SUC3 isoform X1 [Cicer arietinum]	9	UUGCCAACAACACUGUGCAGGG&UGUUGCAU-GUGUUGUUGGUUU	GO:0031224(intrinsic component of membrane);GO:0031226(intrinsic component of plasma membrane);GO:0008515(sucrose transmembrane transporter activity);GO:0015157(oligosaccharide transmembrane transporter activity);GO:0016021(integral component of membrane);GO:0015772(oligosaccharide transport);GO:0006810(transport);GO:0044425(membrane part);GO:0071944(cell periphery);GO:0016020(membrane);GO:002285…	NA
ahy-MIR3513-p3_1ss5AG	XM_016101742.2	gi|356524218|ref|XP_003530728.1;PREDICTED: cysteine-rich repeat secretory protein 12 [Glycine max]	10	CUGCCUG-GACGCAUGCGGCG&UGUUGCAUGUGUUGUUGGUUU	GO:0044425(membrane part);GO:0016021(integral component of membrane);GO:0016020(membrane);GO:0031224(intrinsic component of membrane)	NA
ahy-MIR3513-p3_1ss5AG	XM_016102069.2	gi|356524846|ref|XP_003531039.1;PREDICTED: 3',5'-nucleoside bisphosphate phosphatase-like [Glycine max]	8.5	AGGCUGGCAGCAUAUAGCGACC&UGUUGC-AUGUGUUGUUGGUUU	GO:0097159(organic cyclic compound binding);GO:0046483(heterocycle metabolic process);GO:0090304(nucleic acid metabolic process);GO:0044249(cellular biosynthetic process);GO:1901576(organic substance biosynthetic process);GO:0009059(macromolecule biosynthetic process);GO:0003887(DNA-directed DNA polymerase activity);GO:1901362(organic cyclic compound biosynthetic process);GO:0019438(aromatic comp…	NA
ahy-MIR3513-p3_1ss5AG	XM_016102294.2	gi|828324912|ref|XP_012573450.1;PREDICTED: lysine-specific demethylase JMJ25 [Cicer arietinum]	11.5	AAGCUGAAAGAAGCACAUGCAGCA&UGUUGCAUGUGU---UGUUGGUUU	GO:0008152(metabolic process);GO:0003824(catalytic activity)	NA
ahy-MIR3513-p3_1ss5AG	XM_016102975.2	gi|593489589|ref|XP_007141662.1;hypothetical protein PHAVU_008G214700g [Phaseolus vulgaris]	11.5	CCACCAGCAGCGGCAUGAGCAGCA&UGUUGC--AUGU-GUUGUUGGUUU	GO:0006725(cellular aromatic compound metabolic process);GO:1901362(organic cyclic compound biosynthetic process);GO:0008152(metabolic process);GO:0034654(nucleobase-containing compound biosynthetic process);GO:0071704(organic substance metabolic process);GO:0097659(nucleic acid-templated transcription);GO:0034641(cellular nitrogen compound metabolic process);GO:0006807(nitrogen compound metaboli…	NA
ahy-MIR3513-p3_1ss5AG	XM_016103545.2	gi|502079249|ref|XP_004486201.1;PREDICTED: uncharacterized protein LOC101488219 [Cicer arietinum]	6.5	GGACCAAUCAAACGCAUGCAAGA&UGUUGCAUGUGUU--GUUGGUUU	GO:0016021(integral component of membrane);GO:0044425(membrane part);GO:0031224(intrinsic component of membrane);GO:0016020(membrane)	NA
ahy-MIR3513-p3_1ss5AG	XM_016103635.2	gi|356555783|ref|XP_003546209.1;PREDICTED: nuclear inhibitor of protein phosphatase 1-like [Glycine max]	10	AUCCCAACAGCAUCAGCAGCA&UGUUGCAUGUGUUGUUGGUUU	NA	NA
ahy-MIR3513-p3_1ss5AG	XM_016103768.2	gi|593693942|ref|XP_007147492.1;hypothetical protein PHAVU_006G129000g [Phaseolus vulgaris]	8.5	AAGCCAACAACACAUGCUGAAAACA&UGUU----GCAUGUGUUGUUGGUUU	GO:0043229(intracellular organelle);GO:0044437(vacuolar part);GO:0043227(membrane-bounded organelle);GO:0005774(vacuolar membrane);GO:0044464(cell part);GO:0044424(intracellular part);GO:0044446(intracellular organelle part);GO:0005773(vacuole);GO:0098588(bounding membrane of organelle);GO:0044444(cytoplasmic part);GO:0044422(organelle part);GO:0031090(organelle membrane);GO:0005623(cell);GO:0016…	NA
ahy-MIR3513-p3_1ss5AG	XM_016104294.2	gi|502086481|ref|XP_004488232.1;PREDICTED: uncharacterized protein LOC101489232 [Cicer arietinum]	9	UAACCCACAGCGCGUGC-GCG&UGUUGCAUGUGUUGUUGGUUU	GO:0016021(integral component of membrane);GO:0044425(membrane part);GO:0016020(membrane);GO:0031224(intrinsic component of membrane)	NA
ahy-MIR3513-p3_1ss5AG	XM_016104738.2	gi|502143329|ref|XP_004505300.1;PREDICTED: DNA-directed RNA polymerases II, IV and V subunit 3-like [Cicer arietinum]	8	UGACU-GCGACGCGUGCGACG&UGUUGCAUGUGUUGUUGGUUU	GO:0044424(intracellular part);GO:0016779(nucleotidyltransferase activity);GO:0016591(DNA-directed RNA polymerase II, holoenzyme);GO:0031974(membrane-enclosed lumen);GO:0034062(5'-3' RNA polymerase activity);GO:0001055(RNA polymerase II activity);GO:0032774(RNA biosynthetic process);GO:0043227(membrane-bounded organelle);GO:0034641(cellular nitrogen compound metabolic process);GO:0097159(organic …	ko00230(Purine metabolism);ko01100(Metabolic pathways);ko03020(RNA polymerase);ko00240(Pyrimidine metabolism)
ahy-MIR3513-p3_1ss5AG	XM_016106071.2	gi|955342829|ref|XP_014617920.1;PREDICTED: polygalacturonate 4-alpha-galacturonosyltransferase-like isoform X1 [Glycine max]	9	CAACCAACAACACAUGGUGUACA&UGU--UGCAUGUGUUGUUGGUUU	GO:0000139(Golgi membrane);GO:0043229(intracellular organelle);GO:0005623(cell);GO:0031090(organelle membrane);GO:0016740(transferase activity);GO:0098588(bounding membrane of organelle);GO:0045489(pectin biosynthetic process);GO:0044431(Golgi apparatus part);GO:0005976(polysaccharide metabolic process);GO:0071704(organic substance metabolic process);GO:1901576(organic substance biosynthetic proc…	ko00520(Amino sugar and nucleotide sugar metabolism)
ahy-MIR3513-p3_1ss5AG	XM_016107074.2	gi|950962643|ref|XP_014498147.1;PREDICTED: cell division cycle protein 27 homolog B-like isoform X1 [Vigna radiata var. radiata]	4.5	CAACCAA-AACACAUGCAAGG&UGUUGCAUGUGUUGUUGGUUU	NA	ko04120(Ubiquitin mediated proteolysis)
ahy-MIR3513-p3_1ss5AG	XM_016107124.2	gi|922339019|ref|XP_003621524.2;DSBA oxidoreductase family protein [Medicago truncatula];gi|593331964|ref|XP_007139408.1;hypothetical protein PHAVU_008G027000g [Phaseolus vulgaris];gi|593331980|ref|XP_007139416.1;hypothetical protein PHAVU_008G027600g [Phaseolus vulgaris]	12	GGAUCAUGGCUGCAGCGCAUAGCAGCA&UGUUGC-AUGUGUUGU-----UGGUUU	GO:0005737(cytoplasm);GO:0009605(response to external stimulus);GO:0009814(defense response, incompatible interaction);GO:0005829(cytosol);GO:0050832(defense response to fungus);GO:0002376(immune system process);GO:0015035(protein disulfide oxidoreductase activity);GO:0044464(cell part);GO:0003824(catalytic activity);GO:0005623(cell);GO:0009607(response to biotic stimulus);GO:0006952(defense resp…	NA
ahy-MIR3513-p3_1ss5AG	XM_016107261.2	gi|965616126|dbj|BAU01276.1;hypothetical protein VIGAN_11047800 [Vigna angularis var. angularis]	10	AAACCAACAACACCACCAGCAACA&UGUUGC---AUGUGUUGUUGGUUU	GO:0097159(organic cyclic compound binding);GO:1901363(heterocyclic compound binding);GO:0003723(RNA binding);GO:0005488(binding);GO:0003676(nucleic acid binding)	NA
ahy-MIR3513-p3_1ss5AG	XM_016107281.2	gi|525313485|ref|NP_001266068.1;aquaporin NIP2-1-like [Cicer arietinum]	16	GAACCAGCAACACAAAUUGGUGCCACG&UGUUGCA------UGUGUUGUUGGUUU	GO:0006884(cell volume homeostasis);GO:0005887(integral component of plasma membrane);GO:0044425(membrane part);GO:0071702(organic substance transport);GO:0019725(cellular homeostasis);GO:0015166(polyol transmembrane transporter activity);GO:0022803(passive transmembrane transporter activity);GO:0044459(plasma membrane part);GO:0015250(water channel activity);GO:0051179(localization);GO:0016043(c…	NA
ahy-MIR3513-p3_1ss5AG	XM_016107731.2	gi|356495970|ref|XP_003516843.1;PREDICTED: plastidal glycolate/glycerate translocator 1, chloroplastic-like [Glycine max];gi|593790328|ref|XP_007158203.1;hypothetical protein PHAVU_002G132800g [Phaseolus vulgaris]	9	UUCCCAACAGCACUUGGGACA&UGUUGCAUGUGUUGUUGGUUU	GO:0009526(plastid envelope);GO:0043227(membrane-bounded organelle);GO:0009528(plastid inner membrane);GO:0071840(cellular component organization or biogenesis);GO:0043229(intracellular organelle);GO:0016020(membrane);GO:0044464(cell part);GO:0009706(chloroplast inner membrane);GO:0009507(chloroplast);GO:0031224(intrinsic component of membrane);GO:0009536(plastid);GO:0006996(organelle organizatio…	NA
ahy-MIR3513-p3_1ss5AG	XM_016107983.2	gi|947080196|gb|KRH28985.1;hypothetical protein GLYMA_11G090000 [Glycine max]	6.5	UGACCAAUCCAACAUAUGCAGCU&UGUUGCAUGUGUUG--UUGGUUU	GO:0005215(transporter activity);GO:0044464(cell part);GO:0005623(cell);GO:0022857(transmembrane transporter activity);GO:0005886(plasma membrane);GO:0006810(transport);GO:0071944(cell periphery);GO:0016020(membrane);GO:0051179(localization);GO:0051234(establishment of localization)	ko01110(Biosynthesis of secondary metabolites);ko00100(Steroid biosynthesis);ko01100(Metabolic pathways);ko00909(Sesquiterpenoid and triterpenoid biosynthesis)
ahy-MIR3513-p3_1ss5AG	XM_016108538.2	gi|351722861|ref|NP_001235211.1;uncharacterized protein LOC100305681 [Glycine max]	7.5	CGACCGUGCAGCAC-UGCAGCA&UGUUGCAUGUGUUGU-UGGUUU	NA	NA
ahy-MIR3513-p3_1ss5AG	XM_016109248.2	gi|502159097|ref|XP_004511392.1;PREDICTED: non-specific lipid-transfer protein-like protein At5g64080 [Cicer arietinum]	8.5	GGACCAGCAGCACUUGGACCA&UGUUGCAUGUGUUGUUGGUUU	NA	NA
ahy-MIR3513-p3_1ss5AG	XM_016109249.2	gi|502159097|ref|XP_004511392.1;PREDICTED: non-specific lipid-transfer protein-like protein At5g64080 [Cicer arietinum]	8.5	GGACCAGCAGCACUUGGACCA&UGUUGCAUGUGUUGUUGGUUU	NA	NA
ahy-MIR3513-p3_1ss5AG	XM_016109356.2	gi|955304370|ref|XP_006573896.2;PREDICTED: cysteine-rich receptor-like protein kinase 15 [Glycine max]	9.5	CUGCCAACAACAUGUUUGCAGCA&UGUUGCA--UGUGUUGUUGGUUU	GO:0032553(ribonucleotide binding);GO:0097367(carbohydrate derivative binding);GO:1901363(heterocyclic compound binding);GO:1901265(nucleoside phosphate binding);GO:0016020(membrane);GO:0004672(protein kinase activity);GO:0006950(response to stress);GO:0005488(binding);GO:0030554(adenyl nucleotide binding);GO:0044464(cell part);GO:0071704(organic substance metabolic process);GO:0019538(protein me…	NA
ahy-MIR3513-p3_1ss5AG	XM_016109531.2	gi|922349122|ref|XP_003619440.2;NBS-LRR type disease resistance protein [Medicago truncatula]	9.5	GAACUGAGCAGCACAUGUAUGG&UGUUGCAUGUGUUGUU-GGUUU	NA	NA
ahy-MIR3513-p3_1ss5AG	XM_016110034.2	gi|593788770|ref|XP_007157424.1;hypothetical protein PHAVU_002G069100g [Phaseolus vulgaris];gi|574139405|emb|CCW28804.1;hypothetical protein ARAX_ADH177M04-005 [Arachis duranensis]	6.5	GAACCGGCUGCACAUGUAGCU&UGUUGCAUGUGUUGUUGGUUU	GO:0016462(pyrophosphatase activity);GO:0016787(hydrolase activity);GO:0016817(hydrolase activity, acting on acid anhydrides);GO:0003824(catalytic activity);GO:0016818(hydrolase activity, acting on acid anhydrides, in phosphorus-containing anhydrides)	NA
ahy-MIR3513-p3_1ss5AG	XM_016110480.2	gi|593784993|ref|XP_007155537.1;hypothetical protein PHAVU_003G210200g [Phaseolus vulgaris]	15	ACACCGGCAAAAUUUGCAUGCAGCU&UGUUGCAUGUG----UUGUUGGUUU	GO:0015031(protein transport);GO:0017119(Golgi transport complex);GO:0044464(cell part);GO:0045184(establishment of protein localization);GO:0006810(transport);GO:0016020(membrane);GO:0044422(organelle part);GO:0007030(Golgi organization);GO:0043227(membrane-bounded organelle);GO:0044424(intracellular part);GO:0071840(cellular component organization or biogenesis);GO:0042886(amide transport);GO:0…	NA
ahy-MIR3513-p3_1ss5AG	XM_016110539.2	gi|357498565|ref|XP_003619571.1;Kunitz type trypsin inhibitor / Alpha-fucosidase [Medicago truncatula]	9.5	UUGCCGGCACCAUAUGUAGCU&UGUUGCAUGUGUUGUUGGUUU	NA	NA
ahy-MIR3513-p3_1ss5AG	XM_016111463.2	gi|356520645|ref|XP_003528971.1;PREDICTED: serine/threonine-protein kinase EDR1 isoform X1 [Glycine max];gi|571478141|ref|XP_006587479.1;PREDICTED: serine/threonine-protein kinase EDR1-like isoform X2 [Glycine max]	12.5	GAAUCAACGAUAUGCACAUGCAAGA&UGUUGCAUGUGU----UGUUGGUUU	GO:0016773(phosphotransferase activity, alcohol group as acceptor);GO:1901564(organonitrogen compound metabolic process);GO:1901265(nucleoside phosphate binding);GO:0050794(regulation of cellular process);GO:0043170(macromolecule metabolic process);GO:0000166(nucleotide binding);GO:0016310(phosphorylation);GO:0009987(cellular process);GO:0005622(intracellular);GO:1901363(heterocyclic compound bin…	NA
ahy-MIR3513-p3_1ss5AG	XM_016111616.1	gi|922349947|ref|XP_013450840.1;NHL domain protein [Medicago truncatula]	13.5	CCGCCAGCGACGACGACAUGCAAGA&UGUUGCAUGU----GUUGUUGGUUU	NA	NA
ahy-MIR3513-p3_1ss5AG	XM_016112037.2	gi|922328229|ref|XP_013443507.1;GDSL-like lipase/acylhydrolase [Medicago truncatula]	6	GAGCCAACCAAAUAUAUGCAAUA&UGUUGCAUGUGUU--GUUGGUUU	GO:0016787(hydrolase activity);GO:0003824(catalytic activity)	ko01110(Biosynthesis of secondary metabolites);ko00901(Indole alkaloid biosynthesis);ko00561(Glycerolipid metabolism);ko01100(Metabolic pathways);ko00940(Phenylpropanoid biosynthesis);ko00460(Cyanoamino acid metabolism);ko00500(Starch and sucrose metabolism);ko00860(Porphyrin and chlorophyll metabolism);ko00900(Terpenoid backbone biosynthesis)
ahy-MIR3513-p3_1ss5AG	XM_016112394.2	gi|351727717|ref|NP_001238450.1;uncharacterized protein LOC100305900 precursor [Glycine max]	8	AGAUCAGCGACAGCUGUGACA&UGUUGCAUGUGUUGUUGGUUU	GO:0030234(enzyme regulator activity);GO:0016788(hydrolase activity, acting on ester bonds);GO:0050790(regulation of catalytic activity);GO:0043086(negative regulation of catalytic activity);GO:0065007(biological regulation);GO:0004857(enzyme inhibitor activity);GO:0016787(hydrolase activity);GO:0065009(regulation of molecular function);GO:0003824(catalytic activity);GO:0044092(negative regulatio…	ko01100(Metabolic pathways);ko00040(Pentose and glucuronate interconversions)
ahy-MIR3513-p3_1ss5AG	XM_016112490.2	gi|593703165|ref|XP_007151985.1;hypothetical protein PHAVU_004G092100g [Phaseolus vulgaris]	9	AAACCAACCUCACG-GCGGCG&UGUUGCAUGUGUUGUUGGUUU	NA	NA
ahy-MIR3513-p3_1ss5AG	XM_016112491.2	gi|593703165|ref|XP_007151985.1;hypothetical protein PHAVU_004G092100g [Phaseolus vulgaris]	9	AAACCAACCUCACG-GCGGCG&UGUUGCAUGUGUUGUUGGUUU	NA	NA
ahy-MIR3513-p3_1ss5AG	XM_016112629.2	gi|571445969|ref|XP_006576959.1;PREDICTED: pre-mRNA-processing factor 39-like isoform X1 [Glycine max];gi|734316987|gb|KHN02469.1;Pre-mRNA-processing factor 39 [Glycine soja];gi|571445972|ref|XP_006576960.1;PREDICTED: pre-mRNA-processing factor 39-like isoform X3 [Glycine max];gi|356505060|ref|XP_003521310.1;PREDICTED: pre-mRNA-processing factor 39-like isoform X2 [Glycine max]	7.5	GGUGCAAUAGCAGAUGCAACA&UGUUGCAUGUGUUGUUGGUUU	GO:0008152(metabolic process);GO:0043933(macromolecular complex subunit organization);GO:1990904(ribonucleoprotein complex);GO:0045292(mRNA cis splicing, via spliceosome);GO:0044237(cellular metabolic process);GO:0005622(intracellular);GO:0016043(cellular component organization);GO:0044238(primary metabolic process);GO:0003723(RNA binding);GO:1901363(heterocyclic compound binding);GO:1901360(orga…	NA
ahy-MIR3513-p3_1ss5AG	XM_016112780.2	gi|571464812|ref|XP_006583175.1;PREDICTED: uncharacterized protein LOC100812963 isoform X1 [Glycine max]	8.5	CCUGCAGCAGCAGAUGCAACC&UGUUGCAUGUGUUGUUGGUUU	NA	NA
ahy-MIR3513-p3_1ss5AG	XM_016112975.2	gi|571447187|ref|XP_006577311.1;PREDICTED: uncharacterized protein LOC100802896 isoform X1 [Glycine max]	6	CAACUGAGUACACAUGCAGCC&UGUUGCAUGUGUUGUUGGUUU	GO:0009987(cellular process);GO:0036211(protein modification process);GO:0031224(intrinsic component of membrane);GO:0016020(membrane);GO:0043413(macromolecule glycosylation);GO:0044249(cellular biosynthetic process);GO:0003824(catalytic activity);GO:1901137(carbohydrate derivative biosynthetic process);GO:0044260(cellular macromolecule metabolic process);GO:0006486(protein glycosylation);GO:0036…	ko00510(N-Glycan biosynthesis);ko01100(Metabolic pathways)
ahy-MIR3513-p3_1ss5AG	XM_016113039.2	gi|920711691|gb|KOM52940.1;hypothetical protein LR48_Vigan09g159900 [Vigna angularis]	6	GGAUCAGCAAACAAUAUGCAACA&UGUUGCAUGU-GUU-GUUGGUUU	GO:0016788(hydrolase activity, acting on ester bonds);GO:1901363(heterocyclic compound binding);GO:0006725(cellular aromatic compound metabolic process);GO:0046914(transition metal ion binding);GO:0071704(organic substance metabolic process);GO:0005488(binding);GO:0044237(cellular metabolic process);GO:0090305(nucleic acid phosphodiester bond hydrolysis);GO:0006807(nitrogen compound metabolic pro…	ko04016(MAPK signaling pathway - plant)
ahy-MIR3513-p3_1ss5AG	XM_016113172.2	gi|955387927|ref|XP_014627177.1;PREDICTED: pectinesterase-like [Glycine max]	9.5	CAACC-ACGACACAUGCUUAG&UGUUGCAUGUGUUGUUGGUUU	GO:0071944(cell periphery);GO:0045488(pectin metabolic process);GO:0045330(aspartyl esterase activity);GO:0044464(cell part);GO:0016788(hydrolase activity, acting on ester bonds);GO:0052689(carboxylic ester hydrolase activity);GO:0045490(pectin catabolic process);GO:0044238(primary metabolic process);GO:0005976(polysaccharide metabolic process);GO:0005618(cell wall);GO:0009987(cellular process);G…	ko00040(Pentose and glucuronate interconversions);ko01100(Metabolic pathways)
ahy-MIR3513-p3_1ss5AG	XM_016113257.2	gi|502154667|ref|XP_004509778.1;PREDICTED: translation initiation factor IF-2, mitochondrial [Cicer arietinum]	6.5	CAACGAGCAACACCUGCAAUG&UGUUGCAUGUGUUGUUGGUUU	GO:0071704(organic substance metabolic process);GO:0044249(cellular biosynthetic process);GO:0032555(purine ribonucleotide binding);GO:0044271(cellular nitrogen compound biosynthetic process);GO:1901265(nucleoside phosphate binding);GO:0043170(macromolecule metabolic process);GO:0001883(purine nucleoside binding);GO:0043167(ion binding);GO:0019538(protein metabolic process);GO:0005622(intracellul…	NA
ahy-MIR3513-p3_1ss5AG	XM_016115625.2	gi|358248834|ref|NP_001239692.1;cytochrome P450 71A9 precursor [Glycine max]	10	GAACCGACACGGCA-GCAGCC&UGUUGCAUGUGUUGUUGGUUU	GO:0043169(cation binding);GO:0016020(membrane);GO:0019748(secondary metabolic process);GO:0005488(binding);GO:0016491(oxidoreductase activity);GO:1901363(heterocyclic compound binding);GO:0016705(oxidoreductase activity, acting on paired donors, with incorporation or reduction of molecular oxygen);GO:0005506(iron ion binding);GO:0055114(oxidation-reduction process);GO:0044425(membrane part);GO:0…	NA
ahy-MIR3513-p3_1ss5AG	XM_016115690.2	gi|950995371|ref|XP_014505374.1;PREDICTED: sialyltransferase-like protein 5 [Vigna radiata var. radiata]	5.5	UAGCCAA--GCACAUGCAGCA&UGUUGCAUGUGUUGUUGGUUU	GO:0005794(Golgi apparatus);GO:0005975(carbohydrate metabolic process);GO:0009101(glycoprotein biosynthetic process);GO:0018196(peptidyl-asparagine modification);GO:0018279(protein N-linked glycosylation via asparagine);GO:0043226(organelle);GO:0070085(glycosylation);GO:0034645(cellular macromolecule biosynthetic process);GO:0044237(cellular metabolic process);GO:0043229(intracellular organelle);…	ko01100(Metabolic pathways);ko00603(Glycosphingolipid biosynthesis - globo and isoglobo series);ko00604(Glycosphingolipid biosynthesis - ganglio series)
ahy-MIR3513-p3_1ss5AG	XM_016116011.2	gi|743927529|ref|XP_011007941.1;PREDICTED: probable inactive receptor kinase At4g23740 [Populus euphratica]	14.5	CCACCAGCAGCACUAAGGGCAGCA&UGUUGC---AUGUGUUGUUGGUUU	GO:0032555(purine ribonucleotide binding);GO:0031224(intrinsic component of membrane);GO:0019538(protein metabolic process);GO:0006468(protein phosphorylation);GO:0000166(nucleotide binding);GO:1901564(organonitrogen compound metabolic process);GO:0016772(transferase activity, transferring phosphorus-containing groups);GO:0036211(protein modification process);GO:0071704(organic substance metaboli…	NA
ahy-MIR3513-p3_1ss5AG	XM_016116082.2	gi|734360295|gb|KHN15380.1;E3 ubiquitin-protein ligase BRE1-like 1 [Glycine soja]	7.5	AAACCAGCAUAUGC-UGCAGCA&UGUUGCAUGUGU-UGUUGGUUU	GO:0008270(zinc ion binding);GO:0043167(ion binding);GO:0046872(metal ion binding);GO:0046914(transition metal ion binding);GO:0043169(cation binding);GO:0005488(binding)	NA
ahy-MIR3513-p3_1ss5AG	XM_016116307.2	gi|574584565|ref|NP_001276132.1;endoplasmic oxidoreductin-1-like [Glycine max]	7	GGACCAACU-CACAUUGUAACA&UGUUGCA-UGUGUUGUUGGUUU	GO:0008152(metabolic process);GO:0043231(intracellular membrane-bounded organelle);GO:0043227(membrane-bounded organelle);GO:0043229(intracellular organelle);GO:0016671(oxidoreductase activity, acting on a sulfur group of donors, disulfide as acceptor);GO:0055114(oxidation-reduction process);GO:0044444(cytoplasmic part);GO:0005783(endoplasmic reticulum);GO:0005622(intracellular);GO:0044464(cell p…	ko04141(Protein processing in endoplasmic reticulum)
ahy-MIR3513-p3_1ss5AG	XM_016116845.2	gi|593796114|ref|XP_007161095.1;hypothetical protein PHAVU_001G042200g [Phaseolus vulgaris]	8	GACCCAACAAUACUUGUAGCA&UGUUGCAUGUGUUGUUGGUUU	GO:0006351(transcription, DNA-templated);GO:0071704(organic substance metabolic process);GO:0009058(biosynthetic process);GO:0043226(organelle);GO:0034654(nucleobase-containing compound biosynthetic process);GO:0032774(RNA biosynthetic process);GO:0003700(DNA binding transcription factor activity);GO:0043229(intracellular organelle);GO:0006725(cellular aromatic compound metabolic process);GO:0009…	ko04626(Plant-pathogen interaction);ko04016(MAPK signaling pathway - plant)
ahy-MIR3513-p3_1ss5AG	XM_016116878.2	gi|359806917|ref|NP_001241067.1;uncharacterized protein LOC100786585 [Glycine max]	5.5	GGAUCAUCAUGCACAUGCAACA&UGUUGCAUGUGU-UGUUGGUUU	NA	NA
ahy-MIR3513-p3_1ss5AG	XM_016116915.2	gi|593795660|ref|XP_007160868.1;hypothetical protein PHAVU_001G023500g [Phaseolus vulgaris]	10.5	GGACCAGCUGGAGCAUGAUGCAGCU&UGUUGCAU-GUGUU---GUUGGUUU	GO:1901265(nucleoside phosphate binding);GO:0097159(organic cyclic compound binding);GO:0005622(intracellular);GO:0005737(cytoplasm);GO:0000166(nucleotide binding);GO:1901363(heterocyclic compound binding);GO:0005488(binding);GO:0005623(cell);GO:0003723(RNA binding);GO:0044424(intracellular part);GO:0044464(cell part);GO:0003676(nucleic acid binding);GO:0036094(small molecule binding)	ko03013(RNA transport);ko03015(mRNA surveillance pathway);ko03018(RNA degradation)
ahy-MIR3513-p3_1ss5AG	XM_016116924.2	gi|950992042|ref|XP_014504639.1;PREDICTED: kinesin-like protein FRA1 isoform X2 [Vigna radiata var. radiata]	7.5	AUGAUGACAGCACAUGCAACG&UGUUGCAUGUGUUGUUGGUUU	NA	NA
ahy-MIR3513-p3_1ss5AG	XM_016117033.2	gi|593795716|ref|XP_007160896.1;hypothetical protein PHAVU_001G026200g [Phaseolus vulgaris]	8.5	GAGCGAGGAACACGUGGCGGCA&UGUUGC-AUGUGUUGUUGGUUU	NA	NA
ahy-MIR3513-p3_1ss5AG	XM_016117092.2	gi|571539447|ref|XP_006601299.1;PREDICTED: uncharacterized protein LOC100801978 isoform X1 [Glycine max]	7.5	AAUCCAGCAACAUCUGCAACU&UGUUGCAUGUGUUGUUGGUUU	NA	NA
ahy-MIR3513-p3_1ss5AG	XM_016117093.2	gi|571539447|ref|XP_006601299.1;PREDICTED: uncharacterized protein LOC100801978 isoform X1 [Glycine max]	7.5	AAUCCAGCAACAUCUGCAACU&UGUUGCAUGUGUUGUUGGUUU	NA	NA
ahy-MIR3513-p3_1ss5AG	XM_016118046.2	gi|356554251|ref|XP_003545462.1;PREDICTED: protein argonaute 4-like [Glycine max]	8.5	AAACCAGCAAC-UAUGCUUCU&UGUUGCAUGUGUUGUUGGUUU	GO:0009058(biosynthetic process);GO:0008135(translation factor activity, RNA binding);GO:0043604(amide biosynthetic process);GO:1901564(organonitrogen compound metabolic process);GO:0044237(cellular metabolic process);GO:0008152(metabolic process);GO:0006412(translation);GO:0071704(organic substance metabolic process);GO:0006807(nitrogen compound metabolic process);GO:0005488(binding);GO:0009059(…	NA
ahy-MIR3513-p3_1ss5AG	XM_016118328.2	gi|356540026|ref|XP_003538492.1;PREDICTED: probable sodium-coupled neutral amino acid transporter 6 [Glycine max];gi|955385662|ref|XP_003552164.3;PREDICTED: probable sodium-coupled neutral amino acid transporter 6 [Glycine max]	7	UCUCCACCAACAUAUGCAAUU&UGUUGCAUGUGUUGUUGGUUU	GO:0015711(organic anion transport);GO:0006865(amino acid transport);GO:0046942(carboxylic acid transport);GO:0055085(transmembrane transport);GO:0071705(nitrogen compound transport);GO:0006810(transport);GO:0071702(organic substance transport);GO:0044425(membrane part);GO:0005342(organic acid transmembrane transporter activity);GO:1903825(organic acid transmembrane transport);GO:0015075(ion tran…	NA
ahy-MIR3513-p3_1ss5AG	XM_021125437.1	gi|965604149|dbj|BAT91326.1;hypothetical protein VIGAN_06264600 [Vigna angularis var. angularis];gi|950945536|ref|XP_014494281.1;PREDICTED: structural maintenance of chromosomes protein 6B-like [Vigna radiata var. radiata]	9	AUACC-ACAGCACAUGCUUCC&UGUUGCAUGUGUUGUUGGUUU	GO:0043167(ion binding);GO:0051276(chromosome organization);GO:0044238(primary metabolic process);GO:0006950(response to stress);GO:0035639(purine ribonucleoside triphosphate binding);GO:0044464(cell part);GO:0006807(nitrogen compound metabolic process);GO:0009987(cellular process);GO:0034641(cellular nitrogen compound metabolic process);GO:0043170(macromolecule metabolic process);GO:0000793(cond…	NA
ahy-MIR3513-p3_1ss5AG	XM_021125518.1	gi|947070573|gb|KRH19464.1;hypothetical protein GLYMA_13G118200 [Glycine max];gi|955379803|ref|XP_003550580.3;PREDICTED: SWI/SNF-related matrix-associated actin-dependent regulator of chromatin subfamily A-like protein 1 [Glycine max];gi|593782897|ref|XP_007154489.1;hypothetical protein PHAVU_003G123100g [Phaseolus vulgaris];gi|947053037|gb|KRH02490.1;hypothetical protein GLYMA_17G041700 [Glycine…	7.5	CAGCCAAUGAUAGAUGCGAUA&UGUUGCAUGUGUUGUUGGUUU	GO:1901363(heterocyclic compound binding);GO:0036094(small molecule binding);GO:0097367(carbohydrate derivative binding);GO:0043168(anion binding);GO:0000166(nucleotide binding);GO:0030554(adenyl nucleotide binding);GO:0032559(adenyl ribonucleotide binding);GO:1901265(nucleoside phosphate binding);GO:0097159(organic cyclic compound binding);GO:0032553(ribonucleotide binding);GO:0017076(purine nuc…	NA
ahy-MIR3513-p3_1ss5AG	XM_021125570.1	gi|950992042|ref|XP_014504639.1;PREDICTED: kinesin-like protein FRA1 isoform X2 [Vigna radiata var. radiata]	7.5	AUGAUGACAGCACAUGCAACG&UGUUGCAUGUGUUGUUGGUUU	NA	NA
ahy-MIR3513-p3_1ss5AG	XM_021125813.1	gi|951009708|ref|XP_014509363.1;PREDICTED: flowering time control protein FCA isoform X1 [Vigna radiata var. radiata];gi|356521753|ref|XP_003529516.1;PREDICTED: flowering time control protein FCA-like isoform X1 [Glycine max]	6	CCACCAUCAACAAAUGCAGCA&UGUUGCAUGUGUUGUUGGUUU	GO:0005488(binding);GO:0003676(nucleic acid binding);GO:0036094(small molecule binding);GO:1901363(heterocyclic compound binding);GO:0097159(organic cyclic compound binding);GO:0003723(RNA binding);GO:1901265(nucleoside phosphate binding);GO:0000166(nucleotide binding)	NA
ahy-MIR3513-p3_1ss5AG	XM_021126100.1	gi|571445969|ref|XP_006576959.1;PREDICTED: pre-mRNA-processing factor 39-like isoform X1 [Glycine max];gi|734316987|gb|KHN02469.1;Pre-mRNA-processing factor 39 [Glycine soja];gi|571445972|ref|XP_006576960.1;PREDICTED: pre-mRNA-processing factor 39-like isoform X3 [Glycine max];gi|356505060|ref|XP_003521310.1;PREDICTED: pre-mRNA-processing factor 39-like isoform X2 [Glycine max]	7.5	GGUGCAAUAGCAGAUGCAACA&UGUUGCAUGUGUUGUUGGUUU	GO:0008152(metabolic process);GO:0043933(macromolecular complex subunit organization);GO:1990904(ribonucleoprotein complex);GO:0045292(mRNA cis splicing, via spliceosome);GO:0044237(cellular metabolic process);GO:0005622(intracellular);GO:0016043(cellular component organization);GO:0044238(primary metabolic process);GO:0003723(RNA binding);GO:1901363(heterocyclic compound binding);GO:1901360(orga…	NA
ahy-MIR3513-p3_1ss5AG	XM_021126306.1	gi|356505803|ref|XP_003521679.1;PREDICTED: F-box/LRR-repeat protein 3-like isoform X1 [Glycine max]	8.5	GGGCUAGCAGCACUUGCAAGU&UGUUGCAUGUGUUGUUGGUUU	NA	NA
ahy-MIR3513-p3_1ss5AG	XM_021126689.1	gi|920678583|gb|KOM25603.1;hypothetical protein LR48_Vigan123s002300 [Vigna angularis]	8.5	CAACUAAUUACAGCGCAUGCAAGA&UGUUGCAUGUGUUGU---UGGUUU	GO:0007165(signal transduction);GO:0019001(guanyl nucleotide binding);GO:0097159(organic cyclic compound binding);GO:0000166(nucleotide binding);GO:0065007(biological regulation);GO:0009987(cellular process);GO:0036094(small molecule binding);GO:0050896(response to stimulus);GO:0023052(signaling);GO:0007154(cell communication);GO:0051716(cellular response to stimulus);GO:0050794(regulation of cel…	NA
ahy-MIR3513-p3_1ss5AG	XM_021127362.1	gi|571468137|ref|XP_006584140.1;PREDICTED: ankyrin repeat protein SKIP35-like [Glycine max];gi|920689866|gb|KOM33849.1;hypothetical protein LR48_Vigan01g340500 [Vigna angularis]	10.5	UUGCCGACGGCGCUUGUGACU&UGUUGCAUGUGUUGUUGGUUU	NA	NA
ahy-MIR3513-p3_1ss5AG	XM_021127568.1	gi|356500946|ref|XP_003519291.1;PREDICTED: protein NETWORKED 4A-like isoform X1 [Glycine max]	5.5	GAACCAACUUCACAUGGAACA&UGUUGCAUGUGUUGUUGGUUU	GO:0008092(cytoskeletal protein binding);GO:0003779(actin binding);GO:0005515(protein binding);GO:0005488(binding)	ko03013(RNA transport)
ahy-MIR3513-p3_1ss5AG	XM_021128061.1	gi|571511207|ref|XP_006596386.1;PREDICTED: E3 ubiquitin-protein ligase UPL1-like [Glycine max]	10.5	UAACCAGCUUCGCAUGCGGUCG&UG-UUGCAUGUGUUGUUGGUUU	GO:0016567(protein ubiquitination);GO:0043632(modification-dependent macromolecule catabolic process);GO:0008152(metabolic process);GO:0043229(intracellular organelle);GO:0044248(cellular catabolic process);GO:0009057(macromolecule catabolic process);GO:0006511(ubiquitin-dependent protein catabolic process);GO:0004842(ubiquitin-protein transferase activity);GO:0006464(cellular protein modificatio…	ko04120(Ubiquitin mediated proteolysis)
ahy-MIR3513-p3_1ss5AG	XM_021128209.1	gi|356563099|ref|XP_003549803.1;PREDICTED: uncharacterized protein LOC100791390 isoform X1 [Glycine max];gi|955380063|ref|XP_014625396.1;PREDICTED: uncharacterized protein LOC100791390 isoform X2 [Glycine max]	16.5	AUGCCGGCAUCACAUCCUUUGCAGCA&UGUUGCA-----UGUGUUGUUGGUUU	GO:0043167(ion binding);GO:0004842(ubiquitin-protein transferase activity);GO:0046914(transition metal ion binding);GO:0044464(cell part);GO:0044237(cellular metabolic process);GO:0044267(cellular protein metabolic process);GO:0044238(primary metabolic process);GO:0008270(zinc ion binding);GO:0016740(transferase activity);GO:0003824(catalytic activity);GO:0008152(metabolic process);GO:0065007(bio…	NA
ahy-MIR3513-p3_1ss5AG	XM_021128234.1	gi|593784215|ref|XP_007155148.1;hypothetical protein PHAVU_003G177400g [Phaseolus vulgaris]	10	UCCUCAGCAGCACCAGCAGCA&UGUUGCAUGUGUUGUUGGUUU	GO:0044446(intracellular organelle part);GO:0003700(DNA binding transcription factor activity);GO:0006508(proteolysis);GO:0046872(metal ion binding);GO:0034641(cellular nitrogen compound metabolic process);GO:0031325(positive regulation of cellular metabolic process);GO:0043229(intracellular organelle);GO:0061695(transferase complex, transferring phosphorus-containing groups);GO:0045893(positive …	ko03022(Basal transcription factors)
ahy-MIR3513-p3_1ss5AG	XM_021129995.1	gi|356559132|ref|XP_003547855.1;PREDICTED: probable calcium-binding protein CML16 [Glycine max]	10	AAGCCGACAGCAAUGGCGACG&UGUUGCAUGUGUUGUUGGUUU	GO:0005509(calcium ion binding);GO:0043169(cation binding);GO:0005488(binding);GO:0046872(metal ion binding);GO:0043167(ion binding)	ko04626(Plant-pathogen interaction)
ahy-MIR3513-p3_1ss5AG	XM_021130425.1	gi|951031060|ref|XP_014515054.1;PREDICTED: mediator of RNA polymerase II transcription subunit 9 isoform X2 [Vigna radiata var. radiata];gi|593266736|ref|XP_007135546.1;hypothetical protein PHAVU_010G138400g [Phaseolus vulgaris]	8.5	CCACCAGCAGCAACA-GCAGCA&UGUUGCAUGU-GUUGUUGGUUU	NA	NA
ahy-MIR3513-p3_1ss5AG	XM_021131455.1	gi|951016441|ref|XP_014511120.1;PREDICTED: E3 ubiquitin-protein ligase CIP8 [Vigna radiata var. radiata];gi|593597422|ref|XP_007142752.1;hypothetical protein PHAVU_007G014100g [Phaseolus vulgaris]	11.5	CGCCCAGUCAGCGCGUGACGACG&UGUUG-CAUGUGUUG-UUGGUUU	GO:0044267(cellular protein metabolic process);GO:0005622(intracellular);GO:0044424(intracellular part);GO:0006464(cellular protein modification process);GO:0044237(cellular metabolic process);GO:0044238(primary metabolic process);GO:0032446(protein modification by small protein conjugation);GO:0005623(cell);GO:0009987(cellular process);GO:0071704(organic substance metabolic process);GO:0043412(m…	NA
ahy-MIR3513-p3_1ss5AG	XM_021131692.1	gi|922332556|ref|XP_013444269.1;FBD, F-box and LRR protein, putative [Medicago truncatula];gi|955336377|ref|XP_014634597.1;PREDICTED: FBD-associated F-box protein At5g60610-like [Glycine max]	9	CCACCAACUAUUAAACACAUGCAAUU&UGUUGCAUGUGUU-----GUUGGUUU	NA	NA
ahy-MIR3513-p3_1ss5AG	XM_021131693.1	gi|922332556|ref|XP_013444269.1;FBD, F-box and LRR protein, putative [Medicago truncatula];gi|955336377|ref|XP_014634597.1;PREDICTED: FBD-associated F-box protein At5g60610-like [Glycine max]	9	CCACCAACUAUUAAACACAUGCAAUU&UGUUGCAUGUGUU-----GUUGGUUU	NA	NA
ahy-MIR3513-p3_1ss5AG	XM_021132182.1	gi|571472486|ref|XP_006585625.1;PREDICTED: topless-related protein 1-like isoform X1 [Glycine max]	7.5	GCACCAAUAUCGCAUGCGACU&UGUUGCAUGUGUUGUUGGUUU	GO:0051252(regulation of RNA metabolic process);GO:0050789(regulation of biological process);GO:0050794(regulation of cellular process);GO:0019222(regulation of metabolic process);GO:0031326(regulation of cellular biosynthetic process);GO:0009889(regulation of biosynthetic process);GO:0065007(biological regulation);GO:0010556(regulation of macromolecule biosynthetic process);GO:0051171(regulation…	NA
ahy-MIR3513-p3_1ss5AG	XM_021133362.1	gi|920697446|gb|KOM40671.1;hypothetical protein LR48_Vigan04g086900 [Vigna angularis]	8	GGGCCAGCAACGUGAGCAAUA&UGUUGCAUGUGUUGUUGGUUU	GO:0098660(inorganic ion transmembrane transport);GO:0098662(inorganic cation transmembrane transport);GO:0034220(ion transmembrane transport);GO:0006811(ion transport);GO:0030001(metal ion transport);GO:0015075(ion transmembrane transporter activity);GO:0098655(cation transmembrane transport);GO:0071805(potassium ion transmembrane transport);GO:0044425(membrane part);GO:0016020(membrane);GO:0015…	NA
ahy-MIR3513-p3_1ss5AG	XM_021133669.1	gi|388501072|gb|AFK38602.1;unknown [Lotus japonicus];gi|950957163|ref|XP_014497003.1;PREDICTED: chloroplastic group IIB intron splicing facilitator CRS2-B, chloroplastic isoform X1 [Vigna radiata var. radiata]	8	CCACCGACGGCUCAGGCAACA&UGUUGCAUGUGUUGUUGGUUU	NA	NA
ahy-MIR3513-p3_1ss5AG	XM_021133721.1	gi|356554800|ref|XP_003545730.1;PREDICTED: dynamin-related protein 3A-like [Glycine max]	9	GCGGCAACGACAUAUGCACGCG&UGU-UGCAUGUGUUGUUGGUUU	GO:0032555(purine ribonucleotide binding);GO:0016462(pyrophosphatase activity);GO:0017076(purine nucleotide binding);GO:1901265(nucleoside phosphate binding);GO:0097367(carbohydrate derivative binding);GO:0001882(nucleoside binding);GO:0097159(organic cyclic compound binding);GO:0016818(hydrolase activity, acting on acid anhydrides, in phosphorus-containing anhydrides);GO:1901363(heterocyclic com…	NA
ahy-MIR3513-p3_1ss5AG	XM_021133722.1	gi|356554800|ref|XP_003545730.1;PREDICTED: dynamin-related protein 3A-like [Glycine max]	9	GCGGCAACGACAUAUGCACGCG&UGU-UGCAUGUGUUGUUGGUUU	GO:0032555(purine ribonucleotide binding);GO:0016462(pyrophosphatase activity);GO:0017076(purine nucleotide binding);GO:1901265(nucleoside phosphate binding);GO:0097367(carbohydrate derivative binding);GO:0001882(nucleoside binding);GO:0097159(organic cyclic compound binding);GO:0016818(hydrolase activity, acting on acid anhydrides, in phosphorus-containing anhydrides);GO:1901363(heterocyclic com…	NA
ahy-MIR3513-p3_1ss5AG	XM_021134769.1	gi|731403037|ref|XP_010654884.1;PREDICTED: uncharacterized protein LOC100251572 [Vitis vinifera]	5.5	UUCCCAG-AACACGUGCAACA&UGUUGCAUGUGUUGUUGGUUU	NA	ko03018(RNA degradation);ko04141(Protein processing in endoplasmic reticulum);ko04144(Endocytosis);ko03040(Spliceosome)
ahy-MIR3513-p3_1ss5AG	XM_021134855.1	gi|950945716|ref|XP_014494326.1;PREDICTED: GTPase Der isoform X2 [Vigna radiata var. radiata];gi|965603595|dbj|BAT90772.1;hypothetical protein VIGAN_06205700 [Vigna angularis var. angularis]	6	GAACCAGCAG-AC-UGCAACA&UGUUGCAUGUGUUGUUGGUUU	GO:0032555(purine ribonucleotide binding);GO:0043168(anion binding);GO:1901265(nucleoside phosphate binding);GO:0036094(small molecule binding);GO:0032553(ribonucleotide binding);GO:0017076(purine nucleotide binding);GO:0032550(purine ribonucleoside binding);GO:0005488(binding);GO:0019001(guanyl nucleotide binding);GO:0097367(carbohydrate derivative binding);GO:0000166(nucleotide binding);GO:0005…	NA
ahy-MIR3513-p3_1ss5AG	XM_021135207.1	gi|951037472|ref|XP_014516923.1;PREDICTED: DNA damage-inducible protein 1 [Vigna radiata var. radiata];gi|947048891|gb|KRG98419.1;hypothetical protein GLYMA_18G072500 [Glycine max]	10.5	UUUCCAGCAGCACAUAAGACG&UGUUGCAUGUGUUGUUGGUUU	GO:0005488(binding);GO:1901564(organonitrogen compound metabolic process);GO:0006807(nitrogen compound metabolic process);GO:0043130(ubiquitin binding);GO:0008233(peptidase activity);GO:0019538(protein metabolic process);GO:0043170(macromolecule metabolic process);GO:0071704(organic substance metabolic process);GO:0003824(catalytic activity);GO:0004190(aspartic-type endopeptidase activity);GO:000…	NA
ahy-MIR3513-p3_1ss5AG	XM_021135246.1	gi|356536883|ref|XP_003536962.1;PREDICTED: probable 125 kDa kinesin-related protein [Glycine max];gi|571497985|ref|XP_003541394.2;PREDICTED: 125 kDa kinesin-related protein-like [Glycine max]	10	AAGCCAACGAUGUUAUAUGCAAUA&UGUUGCAUGU---GUUGUUGGUUU	GO:0003777(microtubule motor activity);GO:0017111(nucleoside-triphosphatase activity);GO:0044430(cytoskeletal part);GO:0003774(motor activity);GO:0043232(intracellular non-membrane-bounded organelle);GO:0005856(cytoskeleton);GO:0016818(hydrolase activity, acting on acid anhydrides, in phosphorus-containing anhydrides);GO:0007018(microtubule-based movement);GO:1990939(ATP-dependent microtubule mot…	NA
ahy-MIR3513-p3_1ss5AG	XM_021135510.1	gi|356569554|ref|XP_003552964.1;PREDICTED: uncharacterized protein LOC100785244 [Glycine max]	5.5	CCACCAGCUACACAU-CAACA&UGUUGCAUGUGUUGUUGGUUU	GO:0046872(metal ion binding);GO:0005488(binding);GO:0003950(NAD+ ADP-ribosyltransferase activity);GO:0016763(transferase activity, transferring pentosyl groups);GO:0016020(membrane);GO:0043167(ion binding);GO:0031224(intrinsic component of membrane);GO:0043169(cation binding);GO:0016021(integral component of membrane);GO:0016757(transferase activity, transferring glycosyl groups);GO:0003824(cata…	NA
[truncated: 10,343 more rows]
