# Supplementary material for: Integration of Small RNA and Degradome Sequencing Reveals the Regulatory Network of Al-Induced Programmed Cell Death in Peanut
Source: Int J Mol Sci. 2021 Dec 27;23(1):246. doi: 10.3390/ijms23010246 (PMC8745729; doi:10.3390/ijms23010246)
Supplement: Supplementary file 1 [file ijms-23-00246-s001.zip › Table S7 Differentially expressed miRNAs-mRNA related to aluminum-induced programmed cell death.xlsx]

## Sheet: Sheet1
Table S7 Differentially expressed miRNAs-mRNA related to aluminum-induced programmed cell death
Query	Transcript	Annotation	Symbol	AllenScore	Sequence	GO	KEGG
gma-miR10420_R-1_1ss2CT	XM_016108166.2	DNA repair endonuclease UVH1	UVH1	11	CGGAGGUGGUGGACAUCAGG&CUUGA--ACCAUCAUUUUUU	GO:0044424(intracellular part);GO:0000003(reproduction);GO:0035825(homologous recombination);GO:0006139(nucleobase-containing compound metabolic process);GO:0071704(organic substance metabolic process);GO:0051304(chromosome separation);GO:0033554(cellular response to stress);GO:0050896(response to stimulus);GO:0044464(cell part);GO:0097159(organic cyclic compound binding);GO:0006996(organelle org…	ko03420(Nucleotide excision repair)
ahy-miR408-3p_L-1R+1_2	XM_016085261.2	thiol:disulfide interchange protein TxlA	TxlA	12.5	GGCCAGCGGGAAGGAGGCGACGGUGCU&UGCACU---GCCUC-UUCCC--UGGCU	GO:0034599(cellular response to oxidative stress);GO:0042592(homeostatic process);GO:0044237(cellular metabolic process);GO:0005622(intracellular);GO:0006979(response to oxidative stress);GO:0015036(disulfide oxidoreductase activity);GO:0006457(protein folding);GO:0016671(oxidoreductase activity, acting on a sulfur group of donors, disulfide as acceptor);GO:0050789(regulation of biological proces…	ko00909(Sesquiterpenoid and triterpenoid biosynthesis)
gma-miR10420_R-1_1ss2CT	XM_016102252.2	20 kDa chaperonin	CPN20	6	GGAAAA-GAUGGUUCGGA&CUUGAACCAUCAUUUUUU	GO:1900409(positive regulation of cellular response to oxidative stress);GO:1901033(positive regulation of response to reactive oxygen species);GO:0050789(regulation of biological process);GO:1902882(regulation of response to oxidative stress);GO:0044444(cytoplasmic part);GO:0043167(ion binding);GO:0043085(positive regulation of catalytic activity);GO:0005739(mitochondrion);GO:1902884(positive re…	NA
gma-miR10420_R-1_1ss2CT	XM_021140409.1	superoxide dismutase [Cu-Zn], chloroplastic-like	SODs	11.5	GAAGAGCCUUGGUGGUUCAUG&CUUGAACCAUCA---UUUUUU	GO:0033554(cellular response to stress);GO:0042221(response to chemical);GO:0009642(response to light intensity);GO:0019430(removal of superoxide radicals);GO:0008152(metabolic process);GO:0034599(cellular response to oxidative stress);GO:0071482(cellular response to light stimulus);GO:0055114(oxidation-reduction process);GO:0009644(response to high light intensity);GO:0046914(transition metal io…	ko04146(Peroxisome)
gma-miR172g_R+1_1ss9AT	XM_016089609.2	superoxide dismutase [Mn]	SODs	8	GGUGAA-CGCAGAGGGUGCUGC&GCAGCACCUUC-AAGAUUCACA	GO:1901701(cellular response to oxygen-containing compound);GO:0098754(detoxification);GO:0008152(metabolic process);GO:0071450(cellular response to oxygen radical);GO:0000303(response to superoxide);GO:0006950(response to stress);GO:0003824(catalytic activity);GO:0042221(response to chemical);GO:0004784(superoxide dismutase activity);GO:0044237(cellular metabolic process);GO:0070887(cellular res…	ko04146(Peroxisome)
gma-miR6300_L-1R+1_2	XM_016096272.2	superoxide dismutase [Cu-Zn]	SODs	8	UCCACUGUAAAUGCAAUGA&UCGUUGUA-GUAUAGUGGU	GO:0009987(cellular process);GO:0009644(response to high light intensity);GO:0043231(intracellular membrane-bounded organelle);GO:0009628(response to abiotic stimulus);GO:0043226(organelle);GO:0005488(binding);GO:0044464(cell part);GO:0071486(cellular response to high light intensity);GO:0098869(cellular oxidant detoxification);GO:0016209(antioxidant activity);GO:0006950(response to stress);GO:00…	ko04146(Peroxisome)
mtr-miR398b	XM_016080446.2	superoxide dismutase [Cu-Zn], chloroplastic	SODs	7.5	UGCGGGUGACCUGGGAAACAUA&UGUGUU-CUCAGGUCGCCCCUG	GO:0042221(response to chemical);GO:0034614(cellular response to reactive oxygen species);GO:0046914(transition metal ion binding);GO:0043169(cation binding);GO:1901701(cellular response to oxygen-containing compound);GO:0009314(response to radiation);GO:0071482(cellular response to light stimulus);GO:1901700(response to oxygen-containing compound);GO:0043167(ion binding);GO:0072593(reactive oxyg…	ko04146(Peroxisome)
mtr-miR398b	XM_016096272.2	superoxide dismutase [Cu-Zn]	SODs	7.5	UGCGGGUGACCUGGGAAACAUA&UGUGUU-CUCAGGUCGCCCCUG	GO:0009987(cellular process);GO:0009644(response to high light intensity);GO:0043231(intracellular membrane-bounded organelle);GO:0009628(response to abiotic stimulus);GO:0043226(organelle);GO:0005488(binding);GO:0044464(cell part);GO:0071486(cellular response to high light intensity);GO:0098869(cellular oxidant detoxification);GO:0016209(antioxidant activity);GO:0006950(response to stress);GO:00…	ko04146(Peroxisome)
mtr-miR398b	XM_016113052.2	superoxide dismutase [Cu-Zn]	SODs	5.5	AAGGGGUUCCCUGAGAUCACA&UGUGUUCUCAGGUCGCCCCUG	GO:1990748(cellular detoxification);GO:0005507(copper ion binding);GO:0042221(response to chemical);GO:0005622(intracellular);GO:0046914(transition metal ion binding);GO:0016721(oxidoreductase activity, acting on superoxide radicals as acceptor);GO:0033554(cellular response to stress);GO:0051716(cellular response to stimulus);GO:0071451(cellular response to superoxide);GO:0003824(catalytic activi…	ko04146(Peroxisome)
eun-MIR530-p3_2ss3AT17CA	XM_016103556.2	stromal cell-derived factor 2-like protein	SDF2L	7	CACGCUGCGAUC-UCAUC&GAUGAAGAACGUAGCGAA	GO:0070085(glycosylation);GO:0005622(intracellular);GO:0043229(intracellular organelle);GO:0031506(cell wall glycoprotein biosynthetic process);GO:0071840(cellular component organization or biogenesis);GO:0044238(primary metabolic process);GO:0098827(endoplasmic reticulum subcompartment);GO:0080134(regulation of response to stress);GO:0044444(cytoplasmic part);GO:0012505(endomembrane system);GO:0…	NA
eun-MIR530-p3_2ss3AT17CA	XM_021139904.1	stromal cell-derived factor 2-like protein	SDF2L	7	CACGCUGCGAUC-UCAUC&GAUGAAGAACGUAGCGAA	GO:0070085(glycosylation);GO:0005622(intracellular);GO:0043229(intracellular organelle);GO:0031506(cell wall glycoprotein biosynthetic process);GO:0071840(cellular component organization or biogenesis);GO:0044238(primary metabolic process);GO:0098827(endoplasmic reticulum subcompartment);GO:0080134(regulation of response to stress);GO:0044444(cytoplasmic part);GO:0012505(endomembrane system);GO:0…	NA
mtr-MIR2592ay-p5_2ss6AG17CG_2	XM_016090001.2	stromal cell-derived factor 2-like protein	SDF2L	5	UUCCCAAAC-ACCCGGGUC&GAGUCGGGUUGUUUGGGAA	GO:0005623(cell);GO:0043229(intracellular organelle);GO:0044260(cellular macromolecule metabolic process);GO:0006057(mannoprotein biosynthetic process);GO:0008152(metabolic process);GO:0012505(endomembrane system);GO:0006056(mannoprotein metabolic process);GO:0016740(transferase activity);GO:1901576(organic substance biosynthetic process);GO:0071554(cell wall organization or biogenesis);GO:004446…	NA
gma-miR10420_R-1_1ss2CT	XM_016113942.2	RING finger protein 219	RNF219	3	GAGAAAUGAUGCUUCAAG&CUUGAACCAUCAUUUUUU	GO:0044248(cellular catabolic process);GO:0050896(response to stimulus);GO:0043227(membrane-bounded organelle);GO:0010498(proteasomal protein catabolic process);GO:0044265(cellular macromolecule catabolic process);GO:0008152(metabolic process);GO:0010243(response to organonitrogen compound);GO:0006464(cellular protein modification process);GO:0031984(organelle subcompartment);GO:0044237(cellular …	ko04141(Protein processing in endoplasmic reticulum)
gma-miR10420_L+1R-2	XM_016113119.2	respiratory burst oxidase homolog protein B	RBOHs	10	CGUUCGAGUGGUUCAGGG&ACCUGAACCAUCAUUUUU	GO:0050664(oxidoreductase activity, acting on NAD(P)H, oxygen as acceptor);GO:0016021(integral component of membrane);GO:0046872(metal ion binding);GO:0031224(intrinsic component of membrane);GO:0004601(peroxidase activity);GO:0044425(membrane part);GO:0050896(response to stimulus);GO:1990748(cellular detoxification);GO:0016684(oxidoreductase activity, acting on peroxide as acceptor);GO:0003824(c…	ko04626(Plant-pathogen interaction);ko04016(MAPK signaling pathway - plant)
gma-miR10420_R-1_1ss2CT	XM_016099546.2	respiratory burst oxidase homolog protein E	RBOHs	5.5	AAGGAGUGCUGGAUCAAG&CUUGAACCAUCAUUUUUU	GO:0044425(membrane part);GO:0004601(peroxidase activity);GO:0008152(metabolic process);GO:0016491(oxidoreductase activity);GO:0009636(response to toxic substance);GO:0016651(oxidoreductase activity, acting on NAD(P)H);GO:0046872(metal ion binding);GO:0050664(oxidoreductase activity, acting on NAD(P)H, oxygen as acceptor);GO:0016684(oxidoreductase activity, acting on peroxide as acceptor);GO:0016…	ko04626(Plant-pathogen interaction);ko04016(MAPK signaling pathway - plant)
mtr-MIR2592bj-p3_2ss11TC18AT	XM_016113119.2	respiratory burst oxidase homolog protein B	RBOHs	8.5	GGACAGGGAUAGUGAUUG&UUCCCACUGUCCCUGUCU	GO:0050664(oxidoreductase activity, acting on NAD(P)H, oxygen as acceptor);GO:0016021(integral component of membrane);GO:0046872(metal ion binding);GO:0031224(intrinsic component of membrane);GO:0004601(peroxidase activity);GO:0044425(membrane part);GO:0050896(response to stimulus);GO:1990748(cellular detoxification);GO:0016684(oxidoreductase activity, acting on peroxide as acceptor);GO:0003824(c…	ko04626(Plant-pathogen interaction);ko04016(MAPK signaling pathway - plant)
mtr-MIR2592bj-p5_2ss12TC19AT	XM_016113119.2	respiratory burst oxidase homolog protein B	RBOHs	10.5	UGGACAGGGAUAGUGAUUGU&AUUCCCACUGUCCCUGUCUA	GO:0050664(oxidoreductase activity, acting on NAD(P)H, oxygen as acceptor);GO:0016021(integral component of membrane);GO:0046872(metal ion binding);GO:0031224(intrinsic component of membrane);GO:0004601(peroxidase activity);GO:0044425(membrane part);GO:0050896(response to stimulus);GO:1990748(cellular detoxification);GO:0016684(oxidoreductase activity, acting on peroxide as acceptor);GO:0003824(c…	ko04626(Plant-pathogen interaction);ko04016(MAPK signaling pathway - plant)
gma-miR6300_L-1R+1_1	XM_016103041.2	26S protease regulatory subunit 8 homolog A	psmc5	8	GCGCACUAUGCUGGAACUU&UCGUUGUAGUAUAGUG-GC	GO:0016817(hydrolase activity, acting on acid anhydrides);GO:0036503(ERAD pathway);GO:0097367(carbohydrate derivative binding);GO:1903508(positive regulation of nucleic acid-templated transcription);GO:0031325(positive regulation of cellular metabolic process);GO:0031981(nuclear lumen);GO:0017076(purine nucleotide binding);GO:0016462(pyrophosphatase activity);GO:0043233(organelle lumen);GO:004424…	ko03050(Proteasome)
gma-miR6300_L-1R+1_1	XM_021130030.1	26S protease regulatory subunit 8 homolog A	psmc5	8	GCGCACUAUGCUGGAACUU&UCGUUGUAGUAUAGUG-GC	GO:0016887(ATPase activity);GO:0016818(hydrolase activity, acting on acid anhydrides, in phosphorus-containing anhydrides);GO:0043227(membrane-bounded organelle);GO:0016787(hydrolase activity);GO:0043226(organelle);GO:0009056(catabolic process);GO:0043231(intracellular membrane-bounded organelle);GO:0043168(anion binding);GO:0051171(regulation of nitrogen compound metabolic process);GO:0022624(pr…	ko03050(Proteasome)
gma-miR6300_L-1R+1_1	XM_021130031.1	26S protease regulatory subunit 8 homolog A	psmc5	8	GCGCACUAUGCUGGAACUU&UCGUUGUAGUAUAGUG-GC	GO:0016887(ATPase activity);GO:0016818(hydrolase activity, acting on acid anhydrides, in phosphorus-containing anhydrides);GO:0043227(membrane-bounded organelle);GO:0016787(hydrolase activity);GO:0043226(organelle);GO:0009056(catabolic process);GO:0043231(intracellular membrane-bounded organelle);GO:0043168(anion binding);GO:0051171(regulation of nitrogen compound metabolic process);GO:0022624(pr…	ko03050(Proteasome)
gma-miR10420_L+1R-2	XM_021134746.1	pentatricopeptide repeat-containing protein At1g69290	PPR	9	GACAUUAGUGGUUCAGGU&ACCUGAACCAUCAUUUUU	GO:0042981(regulation of apoptotic process);GO:0010941(regulation of cell death);GO:0050789(regulation of biological process);GO:0043067(regulation of programmed cell death);GO:0050794(regulation of cellular process);GO:0065007(biological regulation)	NA
gma-MIR10423-p5_1ss3AC	XM_021134747.1	pentatricopeptide repeat-containing protein At1g69290	PPR	3	UGUUGCUUUC-UUGAGAG&CUCUCAAUGAAAGCACCA	GO:0042981(regulation of apoptotic process);GO:0010941(regulation of cell death);GO:0050789(regulation of biological process);GO:0043067(regulation of programmed cell death);GO:0050794(regulation of cellular process);GO:0065007(biological regulation)	NA
gma-miR10420_R-1_1ss5AG	XM_016103774.2	peroxidase 15	PODs	7	CCCUAAUGGUGGUCCCGG&CCUGGACCAUCAUUUUUU	GO:0097159(organic cyclic compound binding);GO:0044248(cellular catabolic process);GO:1990748(cellular detoxification);GO:0004601(peroxidase activity);GO:0050896(response to stimulus);GO:0005576(extracellular region);GO:0098869(cellular oxidant detoxification);GO:0006979(response to oxidative stress);GO:0043167(ion binding);GO:0046906(tetrapyrrole binding);GO:0055114(oxidation-reduction process);…	ko01100(Metabolic pathways);ko00940(Phenylpropanoid biosynthesis);ko01110(Biosynthesis of secondary metabolites)
gma-MIR156u-p3_1ss22CT	XM_016086050.2	peroxidase 66	PODs	4.5	UCUGG-AGAUGGAGAAGUGAGA&GCUCACUUCUCUAUCUGUCAGU	GO:0016209(antioxidant activity);GO:0009056(catabolic process);GO:0097159(organic cyclic compound binding);GO:0042743(hydrogen peroxide metabolic process);GO:0044237(cellular metabolic process);GO:1901363(heterocyclic compound binding);GO:0046906(tetrapyrrole binding);GO:0043169(cation binding);GO:0042221(response to chemical);GO:0098869(cellular oxidant detoxification);GO:0003824(catalytic activ…	ko01110(Biosynthesis of secondary metabolites);ko00940(Phenylpropanoid biosynthesis);ko01100(Metabolic pathways)
gma-miR396a-5p_1ss21GA	XM_016085760.2	peroxidase 42	PODs	6	ACCAUCAAGGAAGCUGUGGAG&UUCCACAGCUUUCUUGAACUA	GO:0004601(peroxidase activity);GO:0020037(heme binding);GO:1990748(cellular detoxification);GO:0005488(binding);GO:0016209(antioxidant activity);GO:0042743(hydrogen peroxide metabolic process);GO:0009636(response to toxic substance);GO:0046872(metal ion binding);GO:0016684(oxidoreductase activity, acting on peroxide as acceptor);GO:0003824(catalytic activity);GO:0043169(cation binding);GO:001649…	ko01100(Metabolic pathways);ko01110(Biosynthesis of secondary metabolites);ko00940(Phenylpropanoid biosynthesis)
gma-miR6300_L-1R+1_1	XM_016101689.2	peroxidase 51	PODs	7	GCCACAAAUACUACAGGGU&UCGUUGUAGUAU-AGUGGC	GO:0008152(metabolic process);GO:0046906(tetrapyrrole binding);GO:0042221(response to chemical);GO:0005576(extracellular region);GO:0044237(cellular metabolic process);GO:0098754(detoxification);GO:0055114(oxidation-reduction process);GO:0005488(binding);GO:0006979(response to oxidative stress);GO:0072593(reactive oxygen species metabolic process);GO:0046872(metal ion binding);GO:0016209(antioxid…	ko01100(Metabolic pathways);ko00940(Phenylpropanoid biosynthesis);ko01110(Biosynthesis of secondary metabolites)
mtr-miR172b_L+1R-1	XM_016082520.2	peroxidase 21	PODs	9	AGCAGGCGUCGUCGAGAAGCUU&GAGAAUCUUGAUGAUGC-UGCA	GO:0009987(cellular process);GO:0098869(cellular oxidant detoxification);GO:0009056(catabolic process);GO:0006950(response to stress);GO:1901363(heterocyclic compound binding);GO:0008152(metabolic process);GO:0042743(hydrogen peroxide metabolic process);GO:0042221(response to chemical);GO:0072593(reactive oxygen species metabolic process);GO:0003824(catalytic activity);GO:1990748(cellular detoxif…	ko01100(Metabolic pathways);ko00940(Phenylpropanoid biosynthesis);ko01110(Biosynthesis of secondary metabolites)
PC-3p-77308_120	XM_016115382.2	peroxidase 44	PODs	11.5	GGUUGGUAACGAGGGAGAGAUU&AAACUCUCCC-AUUUAUCAACC	GO:0008152(metabolic process);GO:1990748(cellular detoxification);GO:0006950(response to stress);GO:0043169(cation binding);GO:0071840(cellular component organization or biogenesis);GO:0016209(antioxidant activity);GO:0071669(plant-type cell wall organization or biogenesis);GO:0005576(extracellular region);GO:0005488(binding);GO:0071555(cell wall organization);GO:0042744(hydrogen peroxide catabol…	ko01110(Biosynthesis of secondary metabolites);ko00940(Phenylpropanoid biosynthesis);ko01100(Metabolic pathways)
gma-miR10420_L+1R-2	XM_016084634.2	PITH domain-containing protein At3g04780	PITHD	9	GAAGAUGAUGGUUUGCAU&ACCUGAACCAUCAUUUUU	GO:0050794(regulation of cellular process);GO:0045454(cell redox homeostasis);GO:0044464(cell part);GO:0000103(sulfate assimilation);GO:0051716(cellular response to stimulus);GO:0065007(biological regulation);GO:0008152(metabolic process);GO:0003824(catalytic activity);GO:0006457(protein folding);GO:0005623(cell);GO:0070887(cellular response to chemical stimulus);GO:0042221(response to chemical);…	NA
gma-miR10420_R-1_1ss2CT	XM_016084634.2	PITH domain-containing protein At3g04780	PITHD	7	AGAAGAUGAUGGUUUGCA&CUUGAACCAUCAUUUUUU	GO:0050794(regulation of cellular process);GO:0045454(cell redox homeostasis);GO:0044464(cell part);GO:0000103(sulfate assimilation);GO:0051716(cellular response to stimulus);GO:0065007(biological regulation);GO:0008152(metabolic process);GO:0003824(catalytic activity);GO:0006457(protein folding);GO:0005623(cell);GO:0070887(cellular response to chemical stimulus);GO:0042221(response to chemical);…	NA
PC-5p-5063_2348	XM_016084634.2	PITH domain-containing protein At3g04780	PITHD	10.5	UUUGCUCUGUGUCGUCCCGUU&CUAGGGAUGAGAUAGAGCAUG	GO:0050794(regulation of cellular process);GO:0045454(cell redox homeostasis);GO:0044464(cell part);GO:0000103(sulfate assimilation);GO:0051716(cellular response to stimulus);GO:0065007(biological regulation);GO:0008152(metabolic process);GO:0003824(catalytic activity);GO:0006457(protein folding);GO:0005623(cell);GO:0070887(cellular response to chemical stimulus);GO:0042221(response to chemical);…	NA
mtr-miR172b_L+1R-1	XM_016100069.1	probable phospholipid hydroperoxide glutathione peroxidase	PHGPx	9.5	AGCGGCAUCAUCAUA--UCUC&GAGAAUCUUGAUGAUGCUGCA	GO:0006979(response to oxidative stress);GO:0098869(cellular oxidant detoxification);GO:0006950(response to stress);GO:1990748(cellular detoxification);GO:0055114(oxidation-reduction process);GO:0009636(response to toxic substance);GO:0042221(response to chemical);GO:0098754(detoxification);GO:0009987(cellular process);GO:0004602(glutathione peroxidase activity);GO:0016684(oxidoreductase activity…	ko00480(Glutathione metabolism);ko00590(Arachidonic acid metabolism)
gma-miR10420_R-1_1ss2CT	XM_016097581.2	probable protein disulfide-isomerase A6	PDIs	5	GAGAAAUG-UGGUACAAG&CUUGAACCAUCAUUUUUU	GO:0042592(homeostatic process);GO:0050896(response to stimulus);GO:0003824(catalytic activity);GO:0043229(intracellular organelle);GO:0005737(cytoplasm);GO:0006950(response to stress);GO:0050794(regulation of cellular process);GO:0045454(cell redox homeostasis);GO:0016864(intramolecular oxidoreductase activity, transposing S-S bonds);GO:0065007(biological regulation);GO:0044464(cell part);GO:000…	ko04141(Protein processing in endoplasmic reticulum)
gma-miR10420_R-1_1ss2CT	XM_016097582.2	probable protein disulfide-isomerase A6	PDIs	5	GAGAAAUG-UGGUACAAG&CUUGAACCAUCAUUUUUU	GO:0042592(homeostatic process);GO:0050896(response to stimulus);GO:0003824(catalytic activity);GO:0043229(intracellular organelle);GO:0005737(cytoplasm);GO:0006950(response to stress);GO:0050794(regulation of cellular process);GO:0045454(cell redox homeostasis);GO:0016864(intramolecular oxidoreductase activity, transposing S-S bonds);GO:0065007(biological regulation);GO:0044464(cell part);GO:000…	ko04141(Protein processing in endoplasmic reticulum)
gma-miR10420_R-1_1ss2CT	XM_016097583.2	probable protein disulfide-isomerase A6	PDIs	5	GAGAAAUG-UGGUACAAG&CUUGAACCAUCAUUUUUU	GO:0042592(homeostatic process);GO:0050896(response to stimulus);GO:0003824(catalytic activity);GO:0043229(intracellular organelle);GO:0005737(cytoplasm);GO:0006950(response to stress);GO:0050794(regulation of cellular process);GO:0045454(cell redox homeostasis);GO:0016864(intramolecular oxidoreductase activity, transposing S-S bonds);GO:0065007(biological regulation);GO:0044464(cell part);GO:000…	ko04141(Protein processing in endoplasmic reticulum)
gma-miR10420_R-1_1ss2CT	XM_016102015.2	protein disulfide-isomerase 5-2	PDIs	7.5	GAAAAAUGCAUGGUUCUCU&CUUGAACCAU-CAUUUUUU	GO:0005911(cell-cell junction);GO:0005774(vacuolar membrane);GO:0033554(cellular response to stress);GO:0019725(cellular homeostasis);GO:0043227(membrane-bounded organelle);GO:0045454(cell redox homeostasis);GO:0050789(regulation of biological process);GO:0044422(organelle part);GO:0005618(cell wall);GO:0030054(cell junction);GO:0031090(organelle membrane);GO:0051716(cellular response to stimulus…	ko04141(Protein processing in endoplasmic reticulum)
mtr-miR166e-5p_2ss10GT11CT	XM_016079085.2	protein disulfide-isomerase	PDIs	5.5	CCUUGAGGCCAAAC-ACCUUCC&GGAAUGUUGUUUGGC-UCGAGG	GO:0005622(intracellular);GO:0016853(isomerase activity);GO:0003824(catalytic activity);GO:0044464(cell part);GO:0033554(cellular response to stress);GO:0045454(cell redox homeostasis);GO:0016860(intramolecular oxidoreductase activity);GO:0051716(cellular response to stimulus);GO:0043231(intracellular membrane-bounded organelle);GO:0050789(regulation of biological process);GO:0005737(cytoplasm);G…	ko04141(Protein processing in endoplasmic reticulum)
mtr-miR166e-5p_2ss10GT11CT	XM_016079086.2	protein disulfide-isomerase	PDIs	5.5	CCUUGAGGCCAAAC-ACCUUCC&GGAAUGUUGUUUGGC-UCGAGG	GO:0005622(intracellular);GO:0016853(isomerase activity);GO:0003824(catalytic activity);GO:0044464(cell part);GO:0033554(cellular response to stress);GO:0045454(cell redox homeostasis);GO:0016860(intramolecular oxidoreductase activity);GO:0051716(cellular response to stimulus);GO:0043231(intracellular membrane-bounded organelle);GO:0050789(regulation of biological process);GO:0005737(cytoplasm);G…	ko04141(Protein processing in endoplasmic reticulum)
mtr-miR166g-5p_1ss11CT	XM_016079086.2	protein disulfide-isomerase	PDIs	5.5	CCUUGAGGCCAAAC-ACCUUCC&GGAAUGUUGUUUGGC-UCGAGG	GO:0005622(intracellular);GO:0016853(isomerase activity);GO:0003824(catalytic activity);GO:0044464(cell part);GO:0033554(cellular response to stress);GO:0045454(cell redox homeostasis);GO:0016860(intramolecular oxidoreductase activity);GO:0051716(cellular response to stimulus);GO:0043231(intracellular membrane-bounded organelle);GO:0050789(regulation of biological process);GO:0005737(cytoplasm);G…	ko04141(Protein processing in endoplasmic reticulum)
gma-miR10420_R-1_1ss2CT	XM_016096903.2	protein disulfide isomerase-like 1-4	PDILs	5.5	CAAGAUGGAUGGUUCAAC&CUUGAACCAUCAUUUUUU	GO:0050896(response to stimulus);GO:0005622(intracellular);GO:0098588(bounding membrane of organelle);GO:0065008(regulation of biological quality);GO:0016853(isomerase activity);GO:0005623(cell);GO:0044464(cell part);GO:0009536(plastid);GO:0034976(response to endoplasmic reticulum stress);GO:0045454(cell redox homeostasis);GO:0012505(endomembrane system);GO:0003756(protein disulfide isomerase act…	ko04141(Protein processing in endoplasmic reticulum)
gma-miR395d_1ss21TC	XM_016080274.2	protein disulfide isomerase-like 1-4	PDILs	6.5	GAAGUUCCUCCCGGUAUUUCA&UGAAGUGUUUGGGGGAACUUC	GO:0065007(biological regulation);GO:0016860(intramolecular oxidoreductase activity);GO:0044424(intracellular part);GO:0003756(protein disulfide isomerase activity);GO:0003824(catalytic activity);GO:0006457(protein folding);GO:0042592(homeostatic process);GO:0050794(regulation of cellular process);GO:0033554(cellular response to stress);GO:0005737(cytoplasm);GO:0006950(response to stress);GO:0043…	ko04141(Protein processing in endoplasmic reticulum)
gma-MIR6300-p3	XM_021137249.1	protein disulfide isomerase-like 1-4	PDILs	9	GGCGCCGGAGUAC--GCCGCUG&UAGUGGUAAGUAUUCC--CGCC	GO:0050896(response to stimulus);GO:0005622(intracellular);GO:0098588(bounding membrane of organelle);GO:0065008(regulation of biological quality);GO:0016853(isomerase activity);GO:0005623(cell);GO:0044464(cell part);GO:0009536(plastid);GO:0034976(response to endoplasmic reticulum stress);GO:0045454(cell redox homeostasis);GO:0012505(endomembrane system);GO:0003756(protein disulfide isomerase act…	ko04141(Protein processing in endoplasmic reticulum)
PC-3p-36353_314	XM_016118199.2	protein disulfide isomerase-like 2-3	PDILs	12	GCUACAUGGUCCAGAUGUUAUGGAAGAG&AUAUUCCAUAGCAUU----UCAUGUAGA	GO:0043231(intracellular membrane-bounded organelle);GO:0065008(regulation of biological quality);GO:0042592(homeostatic process);GO:0051716(cellular response to stimulus);GO:0006950(response to stress);GO:0043227(membrane-bounded organelle);GO:0043226(organelle);GO:0016864(intramolecular oxidoreductase activity, transposing S-S bonds);GO:0016860(intramolecular oxidoreductase activity);GO:0019725…	ko04141(Protein processing in endoplasmic reticulum)
ptc-miR6478_2ss20TC21GA	XM_021127361.1	protein disulfide isomerase-like 1-4	PDILs	7.5	UGCCAGCUGAGUCAAGCACGG&CCGACCUUAGCUCAGUUGGCA	GO:0043178(alcohol binding);GO:0019220(regulation of phosphate metabolic process);GO:0004864(protein phosphatase inhibitor activity);GO:0019888(protein phosphatase regulator activity);GO:1901701(cellular response to oxygen-containing compound);GO:0044092(negative regulation of molecular function);GO:0071229(cellular response to acid chemical);GO:0051171(regulation of nitrogen compound metabolic p…	ko04075(Plant hormone signal transduction);ko04016(MAPK signaling pathway - plant)
ptc-miR6478_R-1_1ss6CT	XM_016080274.2	protein disulfide isomerase-like 1-4	PDILs	7.5	GCC-ACUGAGCUGAAGGGCGA&CCG-ACUUUAGCUCAGUUGGU	GO:0065007(biological regulation);GO:0016860(intramolecular oxidoreductase activity);GO:0044424(intracellular part);GO:0003756(protein disulfide isomerase activity);GO:0003824(catalytic activity);GO:0006457(protein folding);GO:0042592(homeostatic process);GO:0050794(regulation of cellular process);GO:0033554(cellular response to stress);GO:0005737(cytoplasm);GO:0006950(response to stress);GO:0043…	ko04141(Protein processing in endoplasmic reticulum)
gma-miR6300_L-1R+1_2	XM_016091672.1	plastid-lipid-associated protein 6, chloroplastic-like	PAP6	8	ACCACUUGAUGCAACAGCGA&UCGUUGUAGUAU--AGUGGU	GO:0009570(chloroplast stroma);GO:0042651(thylakoid membrane);GO:0044434(chloroplast part);GO:0051704(multi-organism process);GO:0009534(chloroplast thylakoid);GO:0043226(organelle);GO:0043207(response to external biotic stimulus);GO:0031977(thylakoid lumen);GO:0009605(response to external stimulus);GO:0043231(intracellular membrane-bounded organelle);GO:0006952(defense response);GO:0009536(plast…	NA
gma-miR10420_R-1_1ss5AG	XM_021138429.1	protein OS-9 homolog	OS9	12	GGAGGAUGAUAAGGUGGUCCAGG&CCUGGACCA-----UCAUUUUUU	GO:0044267(cellular protein metabolic process);GO:0051603(proteolysis involved in cellular protein catabolic process);GO:0006807(nitrogen compound metabolic process);GO:0009628(response to abiotic stimulus);GO:0006508(proteolysis);GO:0044446(intracellular organelle part);GO:0010243(response to organonitrogen compound);GO:0044257(cellular protein catabolic process);GO:1901564(organonitrogen compou…	ko04141(Protein processing in endoplasmic reticulum)
gma-miR10420_R-1_1ss5AG	XM_021138430.1	protein OS-9 homolog	OS9	12	GGAGGAUGAUAAGGUGGUCCAGG&CCUGGACCA-----UCAUUUUUU	GO:0044267(cellular protein metabolic process);GO:0051603(proteolysis involved in cellular protein catabolic process);GO:0006807(nitrogen compound metabolic process);GO:0009628(response to abiotic stimulus);GO:0006508(proteolysis);GO:0044446(intracellular organelle part);GO:0010243(response to organonitrogen compound);GO:0044257(cellular protein catabolic process);GO:1901564(organonitrogen compou…	ko04141(Protein processing in endoplasmic reticulum)
mtr-MIR2592ay-p5_2ss6AG17CG_1	XM_016079517.2	NADH dehydrogenase [ubiquinone] flavoprotein 2, mitochondrial	NDUFV2	9.5	UCCCGAUAACAACCCUGACCU&GAGUC-GGGUUGU--UUGGGA	GO:0031975(envelope);GO:0098800(inner mitochondrial membrane protein complex);GO:0044424(intracellular part);GO:0044444(cytoplasmic part);GO:0005740(mitochondrial envelope);GO:0008270(zinc ion binding);GO:0044464(cell part);GO:0043231(intracellular membrane-bounded organelle);GO:0005623(cell);GO:0006979(response to oxidative stress);GO:0044429(mitochondrial part);GO:0098803(respiratory chain comp…	ko00190(Oxidative phosphorylation);ko01100(Metabolic pathways)
gma-miR10420_L+1R-2	XM_016092791.2	26S protease regulatory subunit 7	MSS1	8.5	GGAAGUGAACUGGUUCAGAA&ACCUGAACCA--UCAUUUUU	GO:0043233(organelle lumen);GO:0048518(positive regulation of biological process);GO:0044428(nuclear part);GO:0044248(cellular catabolic process);GO:0044267(cellular protein metabolic process);GO:0045898(regulation of RNA polymerase II transcriptional preinitiation complex assembly);GO:0030433(ubiquitin-dependent ERAD pathway);GO:2000144(positive regulation of DNA-templated transcription, initiat…	ko03050(Proteasome)
gma-miR10420_L+1R-2	XM_016092791.2	26S protease regulatory subunit 7	MSS1	8	AGCUCGGAUGGUUCGGGA&ACCUGAACCAUCAUUUUU	GO:0043233(organelle lumen);GO:0048518(positive regulation of biological process);GO:0044428(nuclear part);GO:0044248(cellular catabolic process);GO:0044267(cellular protein metabolic process);GO:0045898(regulation of RNA polymerase II transcriptional preinitiation complex assembly);GO:0030433(ubiquitin-dependent ERAD pathway);GO:2000144(positive regulation of DNA-templated transcription, initiat…	ko03050(Proteasome)
gma-miR10420_R-1_1ss2CT	XM_016092791.2	26S protease regulatory subunit 7	MSS1	8.5	UGGAAGUGAACUGGUUCAGA&CUUGAACCA--UCAUUUUUU	GO:0043233(organelle lumen);GO:0048518(positive regulation of biological process);GO:0044428(nuclear part);GO:0044248(cellular catabolic process);GO:0044267(cellular protein metabolic process);GO:0045898(regulation of RNA polymerase II transcriptional preinitiation complex assembly);GO:0030433(ubiquitin-dependent ERAD pathway);GO:2000144(positive regulation of DNA-templated transcription, initiat…	ko03050(Proteasome)
gma-miR10420_R-1_1ss2CT	XM_016092791.2	26S protease regulatory subunit 7	MSS1	10	GAGCUCGGAUGGUUCGGG&CUUGAACCAUCAUUUUUU	GO:0043233(organelle lumen);GO:0048518(positive regulation of biological process);GO:0044428(nuclear part);GO:0044248(cellular catabolic process);GO:0044267(cellular protein metabolic process);GO:0045898(regulation of RNA polymerase II transcriptional preinitiation complex assembly);GO:0030433(ubiquitin-dependent ERAD pathway);GO:2000144(positive regulation of DNA-templated transcription, initiat…	ko03050(Proteasome)
PC-3p-21315_564	XM_016092791.2	26S protease regulatory subunit 7	MSS1	8	GGAGCUCGGAUGGUUCGGGAA&UUCUUGGGCCAUUCGAGUAGG	GO:0043233(organelle lumen);GO:0048518(positive regulation of biological process);GO:0044428(nuclear part);GO:0044248(cellular catabolic process);GO:0044267(cellular protein metabolic process);GO:0045898(regulation of RNA polymerase II transcriptional preinitiation complex assembly);GO:0030433(ubiquitin-dependent ERAD pathway);GO:2000144(positive regulation of DNA-templated transcription, initiat…	ko03050(Proteasome)
ath-miR8175_L+4	XM_016117745.1	peptide methionine sulfoxide reductase	Msrs	12	UGGCGCUGGCUGCUUCUGGGGUAUCGAAU&GUUCGAU-CCCC---GGCA-ACGGCGCCA	GO:0044238(primary metabolic process);GO:0006950(response to stress);GO:0009987(cellular process);GO:0030091(protein repair);GO:0016491(oxidoreductase activity);GO:0044237(cellular metabolic process);GO:1901564(organonitrogen compound metabolic process);GO:0006807(nitrogen compound metabolic process);GO:0008113(peptide-methionine (S)-S-oxide reductase activity);GO:0008152(metabolic process);GO:00…	NA
gma-miR10420_L+1R-2	XM_016117746.2	peptide methionine sulfoxide reductase	Msrs	6.5	GAGGAUG-UGUGUUCAGGG&ACCUGAAC-CAUCAUUUUU	GO:0044238(primary metabolic process);GO:0006950(response to stress);GO:0009987(cellular process);GO:0030091(protein repair);GO:0016491(oxidoreductase activity);GO:0044237(cellular metabolic process);GO:1901564(organonitrogen compound metabolic process);GO:0006807(nitrogen compound metabolic process);GO:0008113(peptide-methionine (S)-S-oxide reductase activity);GO:0008152(metabolic process);GO:00…	NA
gma-miR10420_R-1_1ss2CT	XM_016099029.2	peptide methionine sulfoxide reductase	Msrs	7.5	GAAAGGUGGUGGUA-GAG&CUUGAACCAUCAUUUUUU	GO:0071704(organic substance metabolic process);GO:0008113(peptide-methionine (S)-S-oxide reductase activity);GO:0050896(response to stimulus);GO:0016667(oxidoreductase activity, acting on a sulfur group of donors);GO:0016671(oxidoreductase activity, acting on a sulfur group of donors, disulfide as acceptor);GO:0043170(macromolecule metabolic process);GO:0030091(protein repair);GO:0006979(respons…	NA
gma-miR10420_R-1_1ss5AG	XM_016099391.2	peptide methionine sulfoxide reductase MsrB	Msrs	9.5	GUUUGAUGAUGGUCCUCC&CCUGGACCAUCAUUUUUU	GO:0033743(peptide-methionine (R)-S-oxide reductase activity);GO:0044424(intracellular part);GO:0006979(response to oxidative stress);GO:0044422(organelle part);GO:0019538(protein metabolic process);GO:0043227(membrane-bounded organelle);GO:0043226(organelle);GO:0044237(cellular metabolic process);GO:0005623(cell);GO:0071704(organic substance metabolic process);GO:0043231(intracellular membrane-b…	NA
gma-miR396a-5p_1ss21GA	XM_016087987.2	metacaspase-1	MCs	8.5	UGGUAACAAGAGAGCUGUGUUG&UUCCACAGCUUUCUUG-AACUA	GO:0006508(proteolysis);GO:0008233(peptidase activity);GO:0003824(catalytic activity);GO:0016787(hydrolase activity);GO:0006807(nitrogen compound metabolic process);GO:0071704(organic substance metabolic process);GO:0044238(primary metabolic process);GO:0019538(protein metabolic process);GO:0008152(metabolic process);GO:1901564(organonitrogen compound metabolic process);GO:0043170(macromolecule m…	NA
mtr-MIR2592bj-p3_2ss11TC18AT	XM_016089542.2	metacaspase-4-like	MCs	10.5	GGAUUCUUGGGGAUGGUGGGUA&UUCCCACUGUCCCU----GUCU	GO:0071704(organic substance metabolic process);GO:0016787(hydrolase activity);GO:0006807(nitrogen compound metabolic process);GO:0043170(macromolecule metabolic process);GO:1901564(organonitrogen compound metabolic process);GO:0006508(proteolysis);GO:0008152(metabolic process);GO:0003824(catalytic activity);GO:0044238(primary metabolic process);GO:0019538(protein metabolic process);GO:0008233(pe…	ko03018(RNA degradation)
PC-3p-2995_3874	XM_016087420.2	MACPF domain-containing protein CAD1	CAD1	8	UCUUGAUGAGGGGAAUACAAG&ACUGUGUUCCCUUGAUCAAAU	GO:0065007(biological regulation);GO:0019222(regulation of metabolic process);GO:0045087(innate immune response);GO:0008219(cell death);GO:0006950(response to stress);GO:0009987(cellular process);GO:0012501(programmed cell death);GO:0050896(response to stimulus);GO:0050794(regulation of cellular process);GO:0002376(immune system process);GO:0010565(regulation of cellular ketone metabolic process)…	ko01100(Metabolic pathways);ko00520(Amino sugar and nucleotide sugar metabolism);ko03022(Basal transcription factors)
mtr-MIR2603-p3_2ss9AC17AC	XM_016084203.2	lon protease homolog 1	LONP1	7	UG-ACAAAUUGGGCAGAGGAC&GUCC-CUGCCC--UUUGUACA	GO:0042623(ATPase activity, coupled);GO:0019222(regulation of metabolic process);GO:0043229(intracellular organelle);GO:0030163(protein catabolic process);GO:0044260(cellular macromolecule metabolic process);GO:0008236(serine-type peptidase activity);GO:0006807(nitrogen compound metabolic process);GO:1901564(organonitrogen compound metabolic process);GO:0001067(regulatory region nucleic acid bind…	NA
PC-3p-27183_435	XM_016084203.2	lon protease homolog 1	LONP1	9.5	ACACCUAUUGGGGUUGUCAUGGG&UUUAUGAUUGCUCCAA-AGGUGA	GO:0042623(ATPase activity, coupled);GO:0019222(regulation of metabolic process);GO:0043229(intracellular organelle);GO:0030163(protein catabolic process);GO:0044260(cellular macromolecule metabolic process);GO:0008236(serine-type peptidase activity);GO:0006807(nitrogen compound metabolic process);GO:1901564(organonitrogen compound metabolic process);GO:0001067(regulatory region nucleic acid bind…	NA
mtr-miR166e-5p_2ss8TC10GT	XM_016112239.1	protein EXECUTER 2	EX2	4.5	CCUGCUGGCCAGGUGACAUUCC&GGAAUGUCGUCUGGCUCG-AGG	GO:0042651(thylakoid membrane);GO:0016020(membrane);GO:0042221(response to chemical);GO:0044436(thylakoid part);GO:0006950(response to stress);GO:0000304(response to singlet oxygen);GO:0005623(cell);GO:0009579(thylakoid);GO:1901700(response to oxygen-containing compound);GO:0044464(cell part);GO:0050896(response to stimulus);GO:0044424(intracellular part);GO:0000302(response to reactive oxygen sp…	ko03018(RNA degradation)
mtr-MIR2592ay-p5_2ss6AG17CG_1	XM_016112239.1	protein EXECUTER 2	EX2	8.5	CCCCGAAGGACCCGCACCC&GAGU-CGGGUUGUUUGGGA	GO:0042651(thylakoid membrane);GO:0016020(membrane);GO:0042221(response to chemical);GO:0044436(thylakoid part);GO:0006950(response to stress);GO:0000304(response to singlet oxygen);GO:0005623(cell);GO:0009579(thylakoid);GO:1901700(response to oxygen-containing compound);GO:0044464(cell part);GO:0050896(response to stimulus);GO:0044424(intracellular part);GO:0000302(response to reactive oxygen sp…	ko03018(RNA degradation)
PC-3p-77308_120	XM_016112239.1	protein EXECUTER 2	EX2	14.5	GGUUGGUGGGUGGGGUACUCA&AAACUCUCCCAUUUAUCAACC	GO:0042651(thylakoid membrane);GO:0016020(membrane);GO:0042221(response to chemical);GO:0044436(thylakoid part);GO:0006950(response to stress);GO:0000304(response to singlet oxygen);GO:0005623(cell);GO:0009579(thylakoid);GO:1901700(response to oxygen-containing compound);GO:0044464(cell part);GO:0050896(response to stimulus);GO:0044424(intracellular part);GO:0000302(response to reactive oxygen sp…	ko03018(RNA degradation)
mtr-miR172c-5p	XM_016086529.2	elongator complex protein 1	ELP1	6.5	AGUGAUAUUGAUGAUGAUGCUGC&GUAGCAUCAUCA-AGAU-UCACA	GO:0010646(regulation of cell communication);GO:0034641(cellular nitrogen compound metabolic process);GO:0006399(tRNA metabolic process);GO:0071229(cellular response to acid chemical);GO:0044260(cellular macromolecule metabolic process);GO:0071396(cellular response to lipid);GO:0032502(developmental process);GO:0016070(RNA metabolic process);GO:0097306(cellular response to alcohol);GO:0034470(ncR…	NA
gma-miR482a-3p_L-2_1ss14GA	XM_016081382.2	E3 ubiquitin-protein ligase SINAT5	E3	4	UAGAAGUGGGUGGAAAUGGGAG&UUCCCAAUUCCACCCAUUCCUA	GO:0016740(transferase activity);GO:0007275(multicellular organism development);GO:0005488(binding);GO:0019787(ubiquitin-like protein transferase activity);GO:0044424(intracellular part);GO:0008270(zinc ion binding);GO:0043167(ion binding);GO:0019538(protein metabolic process);GO:0036211(protein modification process);GO:0043632(modification-dependent macromolecule catabolic process);GO:1901564(or…	ko04120(Ubiquitin mediated proteolysis)
gma-miR482a-3p_L-2_1ss14GA	XM_016081383.2	E3 ubiquitin-protein ligase SINAT5	E3	4	UAGAAGUGGGUGGAAAUGGGAG&UUCCCAAUUCCACCCAUUCCUA	GO:0016740(transferase activity);GO:0007275(multicellular organism development);GO:0005488(binding);GO:0019787(ubiquitin-like protein transferase activity);GO:0044424(intracellular part);GO:0008270(zinc ion binding);GO:0043167(ion binding);GO:0019538(protein metabolic process);GO:0036211(protein modification process);GO:0043632(modification-dependent macromolecule catabolic process);GO:1901564(or…	ko04120(Ubiquitin mediated proteolysis)
gma-miR482a-3p_L-2_1ss14GA	XM_021129631.1	E3 ubiquitin-protein ligase SINAT5	E3	4	UAGAAGUGGGUGGAAAUGGGAG&UUCCCAAUUCCACCCAUUCCUA	GO:0016740(transferase activity);GO:0007275(multicellular organism development);GO:0005488(binding);GO:0019787(ubiquitin-like protein transferase activity);GO:0044424(intracellular part);GO:0008270(zinc ion binding);GO:0043167(ion binding);GO:0019538(protein metabolic process);GO:0036211(protein modification process);GO:0043632(modification-dependent macromolecule catabolic process);GO:1901564(or…	ko04120(Ubiquitin mediated proteolysis)
ath-miR159b-3p_1ss7TA	XM_016092777.2	ubiquitin-conjugating enzyme E2 34	E2	10	CAGGGCUUCUUUCAUUCAUGA&UUUGGAAUGAAGGGAGCUCUU	GO:0031625(ubiquitin protein ligase binding);GO:0008152(metabolic process);GO:0061630(ubiquitin protein ligase activity);GO:1901565(organonitrogen compound catabolic process);GO:0009987(cellular process);GO:0061659(ubiquitin-like protein ligase activity);GO:0043226(organelle);GO:0031224(intrinsic component of membrane);GO:0005515(protein binding);GO:0036503(ERAD pathway);GO:0016567(protein ubiqui…	ko04141(Protein processing in endoplasmic reticulum);ko04120(Ubiquitin mediated proteolysis)
csi-miR167c-3p_1ss10TA	XM_016092776.2	ubiquitin-conjugating enzyme E2 34	E2	7.5	CUUGAAGUUGUUGGAUGGCAG&AGGUCAUCUAGCAGCUUCAAU	GO:0031625(ubiquitin protein ligase binding);GO:0008152(metabolic process);GO:0061630(ubiquitin protein ligase activity);GO:1901565(organonitrogen compound catabolic process);GO:0009987(cellular process);GO:0061659(ubiquitin-like protein ligase activity);GO:0043226(organelle);GO:0031224(intrinsic component of membrane);GO:0005515(protein binding);GO:0036503(ERAD pathway);GO:0016567(protein ubiqui…	ko04141(Protein processing in endoplasmic reticulum);ko04120(Ubiquitin mediated proteolysis)
csi-miR167c-3p_1ss10TA	XM_016092777.2	ubiquitin-conjugating enzyme E2 34	E2	7.5	CUUGAAGUUGUUGGAUGGCAG&AGGUCAUCUAGCAGCUUCAAU	GO:0031625(ubiquitin protein ligase binding);GO:0008152(metabolic process);GO:0061630(ubiquitin protein ligase activity);GO:1901565(organonitrogen compound catabolic process);GO:0009987(cellular process);GO:0061659(ubiquitin-like protein ligase activity);GO:0043226(organelle);GO:0031224(intrinsic component of membrane);GO:0005515(protein binding);GO:0036503(ERAD pathway);GO:0016567(protein ubiqui…	ko04141(Protein processing in endoplasmic reticulum);ko04120(Ubiquitin mediated proteolysis)
mtr-miR172c-5p_L-1R+1	XM_016078067.2	DJ-1 homolog B	DJ1B	6.5	AGGUGGA-CUUGGUGGUGCUC&UAGCAUCAUCAAGAUUCACAU	GO:0061727(methylglyoxal catabolic process to lactate);GO:0051252(regulation of RNA metabolic process);GO:0005829(cytosol);GO:0044282(small molecule catabolic process);GO:1901575(organic substance catabolic process);GO:0072330(monocarboxylic acid biosynthetic process);GO:0050794(regulation of cellular process);GO:0003713(transcription coactivator activity);GO:0044238(primary metabolic process);GO…	NA
PC-5p-30369_386	XM_016078067.2	DJ-1 homolog B	DJ1B	9.5	UGUACCAAUUGCUAAUGGCUCA&UGA-AAGUUAGUAGUUGGUACC	GO:0061727(methylglyoxal catabolic process to lactate);GO:0051252(regulation of RNA metabolic process);GO:0005829(cytosol);GO:0044282(small molecule catabolic process);GO:1901575(organic substance catabolic process);GO:0072330(monocarboxylic acid biosynthetic process);GO:0050794(regulation of cellular process);GO:0003713(transcription coactivator activity);GO:0044238(primary metabolic process);GO…	NA
gma-miR10420_R-1_1ss5AG	XM_016109085.2	cytochrome c	Cyt c	6.5	CAAAGAUGGUGUUUCCAGG&CCUGGA-CCAUCAUUUUUU	GO:0009144(purine nucleoside triphosphate metabolic process);GO:0022900(electron transport chain);GO:0042775(mitochondrial ATP synthesis coupled electron transport);GO:0043229(intracellular organelle);GO:0009167(purine ribonucleoside monophosphate metabolic process);GO:0045333(cellular respiration);GO:0009150(purine ribonucleotide metabolic process);GO:0006139(nucleobase-containing compound metab…	NA
ath-miR159b-3p_1ss7TA	XM_016102113.2	CMP-sialic acid transporter 5	CSTLP5	9	CAGAGUUCUCUUCUAUUCCCUC&UUUGGAAU-GAAGGGAGCUCUU	GO:0031324(negative regulation of cellular metabolic process);GO:0031329(regulation of cellular catabolic process);GO:0048229(gametophyte development);GO:0051248(negative regulation of protein metabolic process);GO:1901505(carbohydrate derivative transmembrane transporter activity);GO:0015295(solute:proton symporter activity);GO:0065007(biological regulation);GO:0008643(carbohydrate transport);GO…	NA
eun-MIR530-p5_2ss3AT17CA	XM_016117685.2	caffeoylshikimate esterase	CSE	13.5	GGCGUUACGUGUCCGUCUUCGUC&GAUGAAGA-----ACGUAGCGAA	GO:0016787(hydrolase activity);GO:0004622(lysophospholipase activity);GO:0000302(response to reactive oxygen species);GO:0071944(cell periphery);GO:0006950(response to stress);GO:0010035(response to inorganic substance);GO:0008374(O-acyltransferase activity);GO:0016020(membrane);GO:0050896(response to stimulus);GO:0052689(carboxylic ester hydrolase activity);GO:0016411(acylglycerol O-acyltransfer…	ko00940(Phenylpropanoid biosynthesis);ko01110(Biosynthesis of secondary metabolites);ko01100(Metabolic pathways)
gma-miR6300_L-1R+1_1	XM_016117685.2	caffeoylshikimate esterase	CSE	10.5	GCCGCUAUGCCUGACAACAA&UCGUUGU--AGUAUAGUGGC	GO:0016787(hydrolase activity);GO:0004622(lysophospholipase activity);GO:0000302(response to reactive oxygen species);GO:0071944(cell periphery);GO:0006950(response to stress);GO:0010035(response to inorganic substance);GO:0008374(O-acyltransferase activity);GO:0016020(membrane);GO:0050896(response to stimulus);GO:0052689(carboxylic ester hydrolase activity);GO:0016411(acylglycerol O-acyltransfer…	ko00940(Phenylpropanoid biosynthesis);ko01110(Biosynthesis of secondary metabolites);ko01100(Metabolic pathways)
mtr-miR398b	XM_016107865.2	copper chaperone for superoxide dismutase, chloroplastic/cytosolic	CCS	7	ACUUGGCGACCUGGGAACAUU&UGUGUUCUCAGGUCGCCCCUG	GO:0008270(zinc ion binding);GO:0050896(response to stimulus);GO:0005737(cytoplasm);GO:0008047(enzyme activator activity);GO:0043231(intracellular membrane-bounded organelle);GO:0046872(metal ion binding);GO:0000303(response to superoxide);GO:0000305(response to oxygen radical);GO:0044446(intracellular organelle part);GO:0009507(chloroplast);GO:0044464(cell part);GO:0043226(organelle);GO:0006811(…	NA
gma-MIR6300-p3_1ss13CT	XM_016078545.2	catalase	CAT	7	GGCGGAGAUAGAUACCGU&GUGGUAAGUAUUUCCGCC	GO:0097159(organic cyclic compound binding);GO:0020037(heme binding);GO:0055114(oxidation-reduction process);GO:0004601(peroxidase activity);GO:0008152(metabolic process);GO:0006950(response to stress);GO:0044237(cellular metabolic process);GO:0009987(cellular process);GO:1901363(heterocyclic compound binding);GO:0098869(cellular oxidant detoxification);GO:0042743(hydrogen peroxide metabolic proc…	ko04146(Peroxisome);ko01110(Biosynthesis of secondary metabolites);ko00630(Glyoxylate and dicarboxylate metabolism);ko00380(Tryptophan metabolism);ko01200(Carbon metabolism);ko04016(MAPK signaling pathway - plant)
gma-MIR6300-p3_1ss15CT	XM_016078545.2	catalase	CAT	10.5	GGCGGAGAUAGAUACCGUUC&UAGUGGUAAGUAUUUCCGCC	GO:0097159(organic cyclic compound binding);GO:0020037(heme binding);GO:0055114(oxidation-reduction process);GO:0004601(peroxidase activity);GO:0008152(metabolic process);GO:0006950(response to stress);GO:0044237(cellular metabolic process);GO:0009987(cellular process);GO:1901363(heterocyclic compound binding);GO:0098869(cellular oxidant detoxification);GO:0042743(hydrogen peroxide metabolic proc…	ko04146(Peroxisome);ko01110(Biosynthesis of secondary metabolites);ko00630(Glyoxylate and dicarboxylate metabolism);ko00380(Tryptophan metabolism);ko01200(Carbon metabolism);ko04016(MAPK signaling pathway - plant)
gma-MIR6300-p5_1ss16CT	XM_016078545.2	catalase	CAT	13.5	GGCGGAGAUAGAUACCGUUCU&AUAGUGGUAAGUAUUUCCGCC	GO:0097159(organic cyclic compound binding);GO:0020037(heme binding);GO:0055114(oxidation-reduction process);GO:0004601(peroxidase activity);GO:0008152(metabolic process);GO:0006950(response to stress);GO:0044237(cellular metabolic process);GO:0009987(cellular process);GO:1901363(heterocyclic compound binding);GO:0098869(cellular oxidant detoxification);GO:0042743(hydrogen peroxide metabolic proc…	ko04146(Peroxisome);ko01110(Biosynthesis of secondary metabolites);ko00630(Glyoxylate and dicarboxylate metabolism);ko00380(Tryptophan metabolism);ko01200(Carbon metabolism);ko04016(MAPK signaling pathway - plant)
gma-miR10420_R-1_1ss5AG	XM_016096857.2	L-ascorbate peroxidase, cytosolic	APXs	10	AAAGAGUGGAGGUCCAUUUGG&CC---UGGACCAUCAUUUUUU	GO:0016684(oxidoreductase activity, acting on peroxide as acceptor);GO:0006979(response to oxidative stress);GO:0009636(response to toxic substance);GO:1901363(heterocyclic compound binding);GO:0020037(heme binding);GO:0098754(detoxification);GO:0050896(response to stimulus);GO:0042221(response to chemical);GO:0006950(response to stress);GO:0016209(antioxidant activity);GO:0055114(oxidation-reduc…	ko00053(Ascorbate and aldarate metabolism);ko00480(Glutathione metabolism)
PC-3p-28359_415	XM_016096390.2	L-ascorbate peroxidase 3	APXs	13	GCAGCUGUGGUGAUCCUCGGU&GUUAAUGAUCACCAUGGCUGA	GO:1990748(cellular detoxification);GO:0097159(organic cyclic compound binding);GO:0016209(antioxidant activity);GO:0004601(peroxidase activity);GO:1901363(heterocyclic compound binding);GO:0016021(integral component of membrane);GO:0044425(membrane part);GO:0009987(cellular process);GO:0008152(metabolic process);GO:0098754(detoxification);GO:0020037(heme binding);GO:0098869(cellular oxidant deto…	ko00480(Glutathione metabolism);ko00053(Ascorbate and aldarate metabolism)
PC-3p-24641_483	XM_016102089.1	alternative oxidase 3, mitochondrial	AOXs	6	GGCUUCCAAAGGAUGCAACUCUCA&AGAGAGAUGCAUGCUUUGAAAGUU	GO:0009916(alternative oxidase activity);GO:0070469(respiratory chain);GO:0044444(cytoplasmic part);GO:0016021(integral component of membrane);GO:0044422(organelle part);GO:0043231(intracellular membrane-bounded organelle);GO:0031966(mitochondrial membrane);GO:0044429(mitochondrial part);GO:0043229(intracellular organelle);GO:0005737(cytoplasm);GO:0016679(oxidoreductase activity, acting on diphen…	NA
PC-3p-24641_483	XM_016102090.2	alternative oxidase 3, mitochondrial	AOXs	6	GGCUUCCAAAGGAUGCAACUCUCA&AGAGAGAUGCAUGCUUUGAAAGUU	GO:0005740(mitochondrial envelope);GO:0044446(intracellular organelle part);GO:0009916(alternative oxidase activity);GO:0005739(mitochondrion);GO:0055114(oxidation-reduction process);GO:0044424(intracellular part);GO:0031224(intrinsic component of membrane);GO:0044444(cytoplasmic part);GO:0003824(catalytic activity);GO:0046872(metal ion binding);GO:0008152(metabolic process);GO:0043226(organelle)…	NA
ptc-MIR171m-p5_1ss17CT	XM_016102089.1	alternative oxidase 3, mitochondrial	AOXs	7	GGUG-GCCGGAUC--UACCACC&CGUGGUAUUGAUCCGGUUCAUC	GO:0009916(alternative oxidase activity);GO:0070469(respiratory chain);GO:0044444(cytoplasmic part);GO:0016021(integral component of membrane);GO:0044422(organelle part);GO:0043231(intracellular membrane-bounded organelle);GO:0031966(mitochondrial membrane);GO:0044429(mitochondrial part);GO:0043229(intracellular organelle);GO:0005737(cytoplasm);GO:0016679(oxidoreductase activity, acting on diphen…	NA
ptc-MIR171m-p5_1ss17CT	XM_021139380.1	alternative oxidase 3, mitochondrial	AOXs	7	GGUG-GCCGGAUC--UACCACC&CGUGGUAUUGAUCCGGUUCAUC	GO:0009916(alternative oxidase activity);GO:0070469(respiratory chain);GO:0044444(cytoplasmic part);GO:0016021(integral component of membrane);GO:0044422(organelle part);GO:0043231(intracellular membrane-bounded organelle);GO:0031966(mitochondrial membrane);GO:0044429(mitochondrial part);GO:0043229(intracellular organelle);GO:0005737(cytoplasm);GO:0016679(oxidoreductase activity, acting on diphen…	NA
