# Supplementary material for: Integration of Small RNA and Degradome Sequencing Reveals the Regulatory Network of Al-Induced Programmed Cell Death in Peanut
Source: Int J Mol Sci. 2021 Dec 27;23(1):246. doi: 10.3390/ijms23010246 (PMC8745729; doi:10.3390/ijms23010246)
Supplement: Supplementary file 1 [file ijms-23-00246-s001.zip › Table S8 The primers and probes used in this study.xlsx]

## Sheet: Sheet1
Table S8. The primers and probes used in this study
Primers for quantitative real-time PCR (miRNA）
U6	U6-F	CATCCGATAAAATTGGAACGA
	U6-R	TTTGTGCGTGTCATCCTTGCG
PC-5p-5063_2348	RT	GTCGTATCCAGTGCAGGGTCCGAGGTATTCGCACTGGATACGACCATGCT
	FP	GCGCGCTAGGGATGAGATAG
	RP	mRQ 3’ Primer (supplied with the kit)
gma-miR6300_L-1R+1_1	RT	GTCGTATCCAGTGCAGGGTCCGAGGTATTCGCACTGGATACGACGCCACT
	FP	GCGCGCGTCGTTGTAGTAT
	RP	mRQ 3’ Primer (supplied with the kit)
mtr-miR398b	RT	GTCGTATCCAGTGCAGGGTCCGAGGTATTCGCACTGGATACGACCAGGGG
	FP	CGCGTGTGTTCTCAGGTCG
	RP	mRQ 3’ Primer (supplied with the kit)
mtr-MIR2603-p3_2ss9AC17AC	RT	GTCGTATCCAGTGCAGGGTCCGAGGTATTCGCACTGGATACGACTGTACA
	FP	CGCGGTCCCTGCCCTT
	RP	mRQ 3’ Primer (supplied with the kit)
peu-MIR2916-p5_1ss5AG	RT	GTCGTATCCAGTGCAGGGTCCGAGGTATTCGCACTGGATACGACTATGGT
	FP	CGCGTACCGTCCTAGTCTCA
	RP	mRQ 3’ Primer (supplied with the kit)
ahy-miR408-3p_L-1R+1_1	RT	GTCGTATCCAGTGCAGGGTCCGAGGTATTCGCACTGGATACGACTGCCAG
	FP	GCGTGCACTGCCTCTTCC
	RP	mRQ 3’ Primer (supplied with the kit)
Primers for quantitative real-time PCR (miRNA target)
Actin	Actin-F	GAGGAGAAGCAGAAGCAAGTTG
	Actin-R	AGACAGCATATCGGCACTCATC
LOC107460847	F	AGCCATCTTCTTTCTTTAGC
	R	TCCTCACTCCAATCGTCA
LOC107462418	F	CACAATCACCGCAAACTC
	R	TTCCGTCGGCTACACTTC
LOC107477395	F	CCCTTTCGCACTCTGTCTGT
	R	TGTCCCTGATGTCTCACTGG
LOC107471475	F	GTGAACCCGATTTATGGA
	R	CGGTGTTGTTATGAGGCT
LOC107487222	F	TCCTTATGGCAAAGCAGT
	R	TATGATCCCAGGCAACAC
LOC107467114	F	AGGTCTGCCTGCCTCAAC
	R	ACCAGTCTCCGATTCCGT
