# Supplementary figures and images for: Integration of Small RNA and Degradome Sequencing Reveals the Regulatory Network of Al-Induced Programmed Cell Death in Peanut
Source: MDPI journal article supplement (doi:10.3390/ijms23010246), 2021-12-27

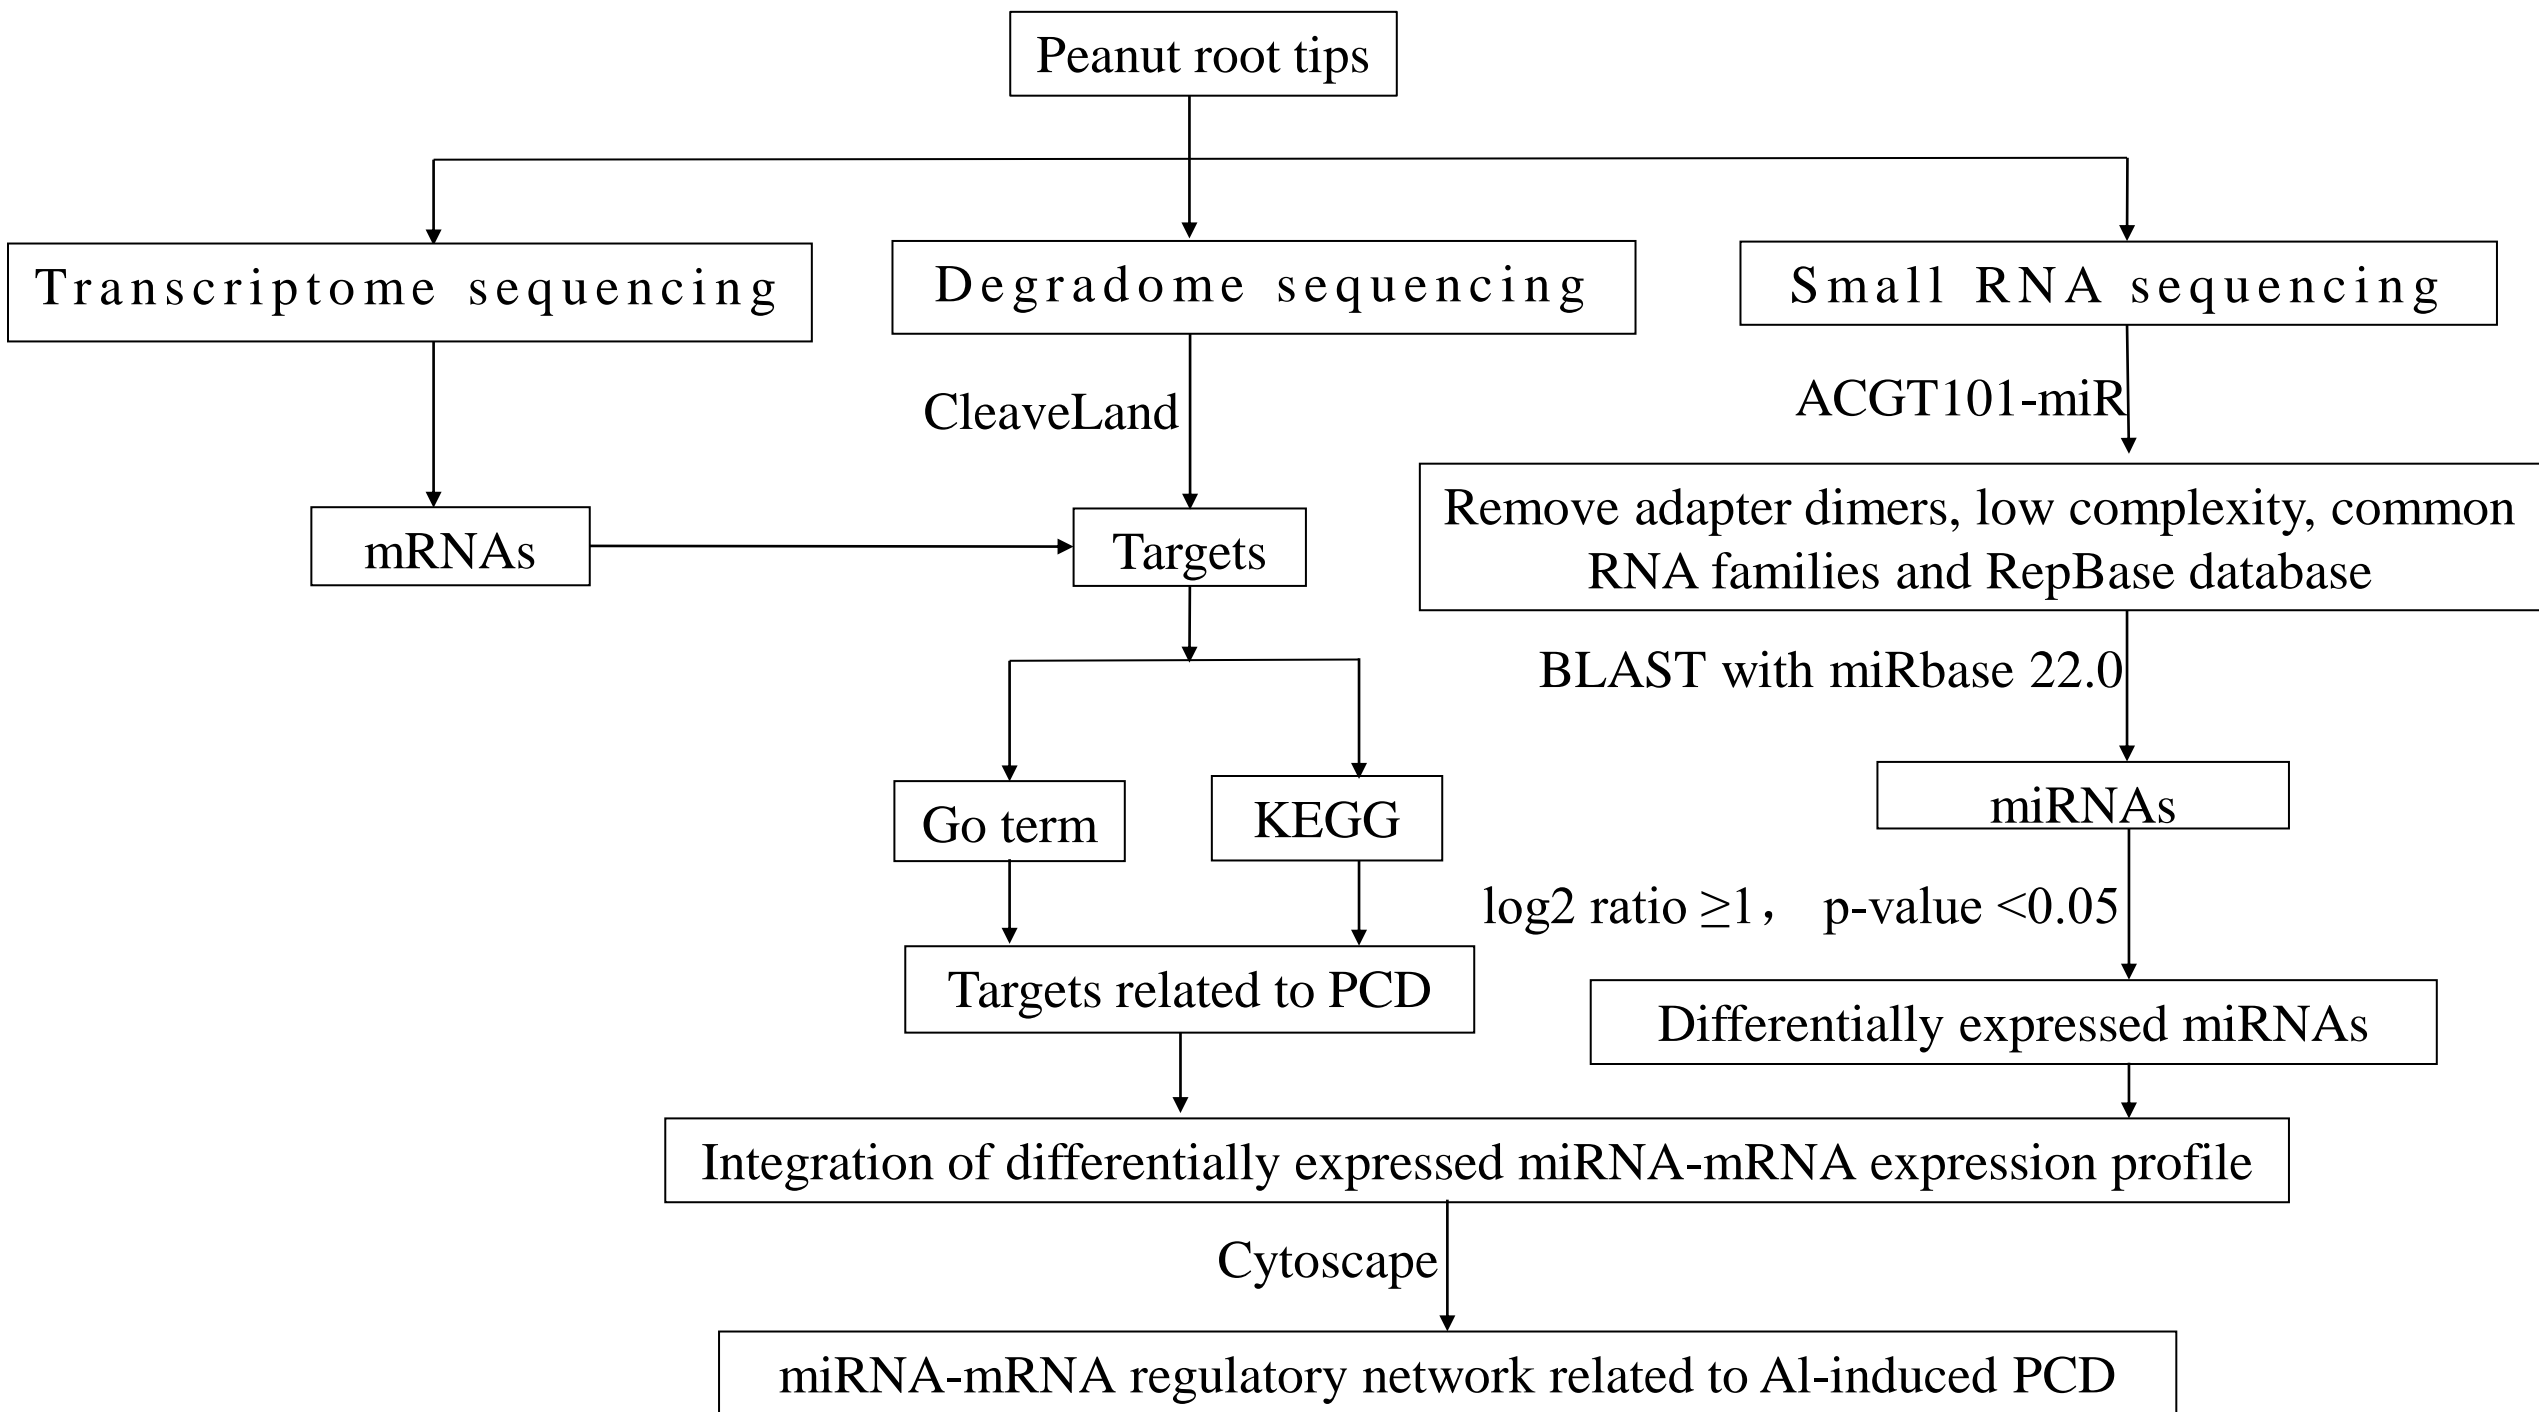

Supplement: s1 [file s1]

Number of miRNA

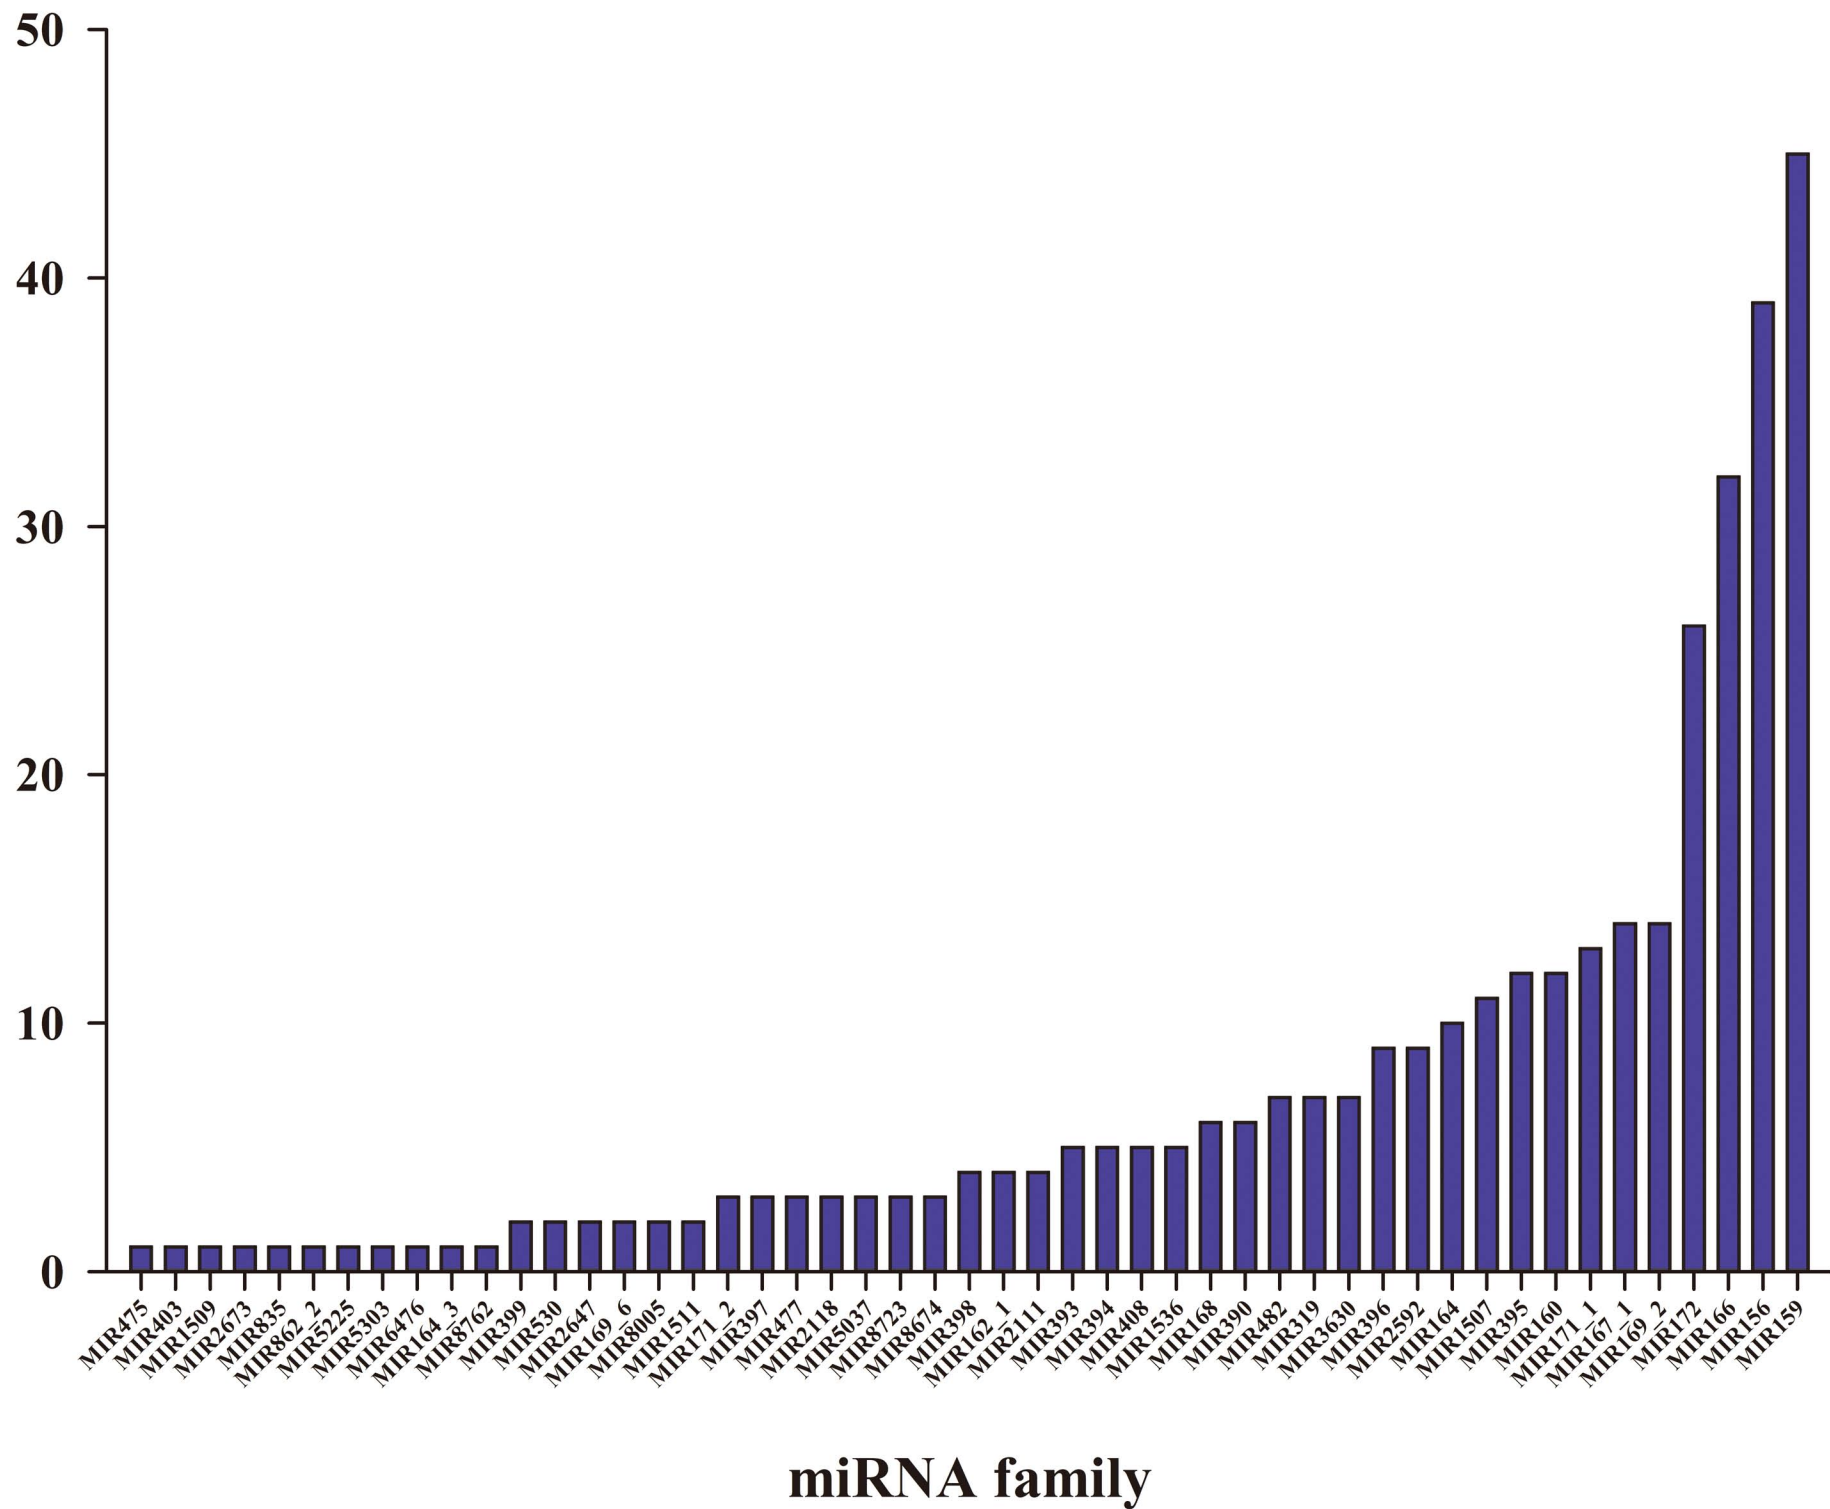

Supplement: s1 [file s1]
